# Supplementary material for: How biological attention mechanisms improve task performance in a large-scale visual system model
Source: eLife journal article supplement (doi:10.7554/elife.38105), 2018-10-01
Supplement: supp [file elife-38105-supp-v1.zip]

Archive with 15 entries (15 files):
- elife_poa_e38105_Figure_6_source_data_1.txt
- elife_poa_e38105_Figure_3_figure_supplement_2.pdf
- elife_poa_e38105_Figure_5_figure_supplement_1.pdf
- elife_poa_e38105_Transparent_Reporting_File.pdf
- elife_poa_e38105_Figure_3_figure_supplement_1.pdf
- elife_poa_e38105_Figure_4_figure_supplement_1.pdf
- elife_poa_e38105_Figure_6_figure_supplement_1.pdf
- elife_poa_e38105_Figure_3_source_data_1.txt
- elife_poa_e38105_Figure_2_source_data_1.txt
- elife_poa_e38105_Figure_6_source_data_2.txt
- elife_poa_e38105_Figure_6_figure_supplement_2.pdf
- elife_poa_e38105_Figure_5_source_data_1.txt
- elife_poa_e38105_Figure_5_source_data_2.txt
- elife_poa_e38105_Source_code_1.txt
- elife_poa_e38105_Figure_7_source_data_1.txt
