# Supplementary material for: How biological attention mechanisms improve task performance in a large-scale visual system model
Source: eLife journal article supplement (doi:10.7554/elife.38105), 2018-10-01
Supplement: supp [file elife-38105-supp-v1.zip › elife_poa_e38105_Figure_2_source_data_1.txt]

(lp0
(lp1
cnumpy.core.multiarray
_reconstruct
p2
(cnumpy
ndarray
p3
(I0
tp4
S'b'
p5
tp6
Rp7
(I1
(I20
I64
tp8
cnumpy
dtype
p9
(S'f8'
p10
I0
I1
tp11
Rp12
(I3
S'<'
p13
NNNI-1
I-1
I0
tp14
bI00
S'\x1a\x04\xba9\xee\x10\xd1\xbfxZ|a\x95\x1e\xcf?\xfe\xe39R@\x9c\xce?\xab\xd0\xefuu\xa4\xd2\xbf\x02\xa3:\xba\x93?\xb5\xbf\x85(0\x89\xa6y\xd3?\x8e\xeeY\xce\x1e#\xd9\xbfw\x16\xf1\xc2\x96b\xbc\xbf\xa0I(\xbe\xc0^\xdc?fj\xdba \xa8\xca?\x99\x8b\xa7|\xc5\x81\xd4\xbf\x01\xce \xd0\xa9\x16\xdc\xbf\x9e\xd8\xabk\xe7Z\xcc\xbf\x16}\xf7z\xf8\xc3\xb0?\xc9\x98\xf7\x0b55\xd1\xbf8#\t\xef\x85\x88\xe0?7\x0f\xa6\x05\x0e\xbb\xd9?\x91\x00\x94,\x80n\xda\xbf\x94\x15n\xf6X\x93\xe2?1f\x80\x11\x02N\xc9?\x97\xb2\xe78_\xab\xc7?\xb9A}\xd7z,\xc5\xbf\xee\x16\xb7\xd2?o\xca?\xa3/6HiI\xd4?\xfb\x98\x90g\x1dP\xbe\xbf\x0c6\xef-R\xb6\xd1?\x10\x1dETNX\xda\xbf\xbd\x9e\x95\xc5Z\xb1\xc8\xbf\x8b7\x0c\x1c\x96\x0b\xd3\xbf\x9d0\xa2\xe5\x07\xa6\xbc?\xc8\xe1\xb6\xbb\x07\xfc\xd7\xbfm\x8c\x97\xf2\x81\x96\xd8?Sq\xb8\xa2\xed"\xb8\xbf\xe9%,\x1b\x91j\xdf?\xf8\xf0}\xf8\xc6\xb8\xd7\xbfc0%B\x8d\t\xd4\xbf\x8b\x9f"\x1fex\xbe\xbf<bst\xb9T\xc3\xbf\x08\xdb6\xdf\xf1/\xcf\xbf/\xe3\xeb\x93\x9ai\x97\xbf\xc9\x03\xa0a\'n\xd4\xbfV+\xda\x9f\xaa&\xc6?\xf5\xbbv\xcd\x1b\xd8\xd6\xbf\x13&(\xd9.\xa9\xd4\xbfp\xb6sh\xec\x86\xd1\xbf\xf9@H\xfe\xeb\xef\xd7\xbfpS\xac\x15\xae~\xa7\xbf\x84\x14fE]\xe3\xd5\xbf\xc3)\x96#)`\xc6\xbf\xb3-\xcb\x10\x84B\xb9?)\xff\x8bW\xde\xfd\xbb\xbfM\xb9\xf5\x9e%\xb2\xd0\xbf\x81\xd6\xd9\x9d\x17\xad\xd3?\x9f\x9d\xbf\rt\xc1\xba\xbf\xab\xfcn\r\xc3x\xc1?\xf0fg\x12\xec{\xc4\xbf"\xe5\x14\xc8\xf7\xa4\xd8?\xe2\x94\x9f\xd8\xec\x0e\xd7?XZ\xdb\x8d\xd9\xf2\xd0\xbf(Oah\'\x82\x90?Fn\xb5\xa9\xb0\xb7\xd5\xbf\xa7\xa8\xb9Pm)\xc7\xbf\xdb\xb0\xb2\xb9=\x99\xd4\xbf\xed\xfa\x05\x81Y\x90\xbf\xbf\xd3\xbe(\xfc\x92\xce\xdd\xbf\x14\x18_\x9eD\x19\xa1?\xbbpi{Z\xc2\xd3?\x0e\xf3\x199\x8d\xef\xe1\xbf\xf8`D\xf0 V\xb7\xbf\x16\x02\r2\xc5\xd7\xd5\xbf\x87\xec\xcb+u\xf4\xe1\xbf\x92Hr\xde\x15\xd5\xc6\xbfKG\xde!Y=\x99\xbf\xf8`q\xe8\x18\xa6\xc5\xbf*\xe8\xcf\xd4\xd9\xd5\xde\xbf\xe9\xbb*\x9b\xc4\x9c\xe4\xbf\xe3H\x947O>\xdc\xbf:\x12\x8a\x8d\xa6\xd2\xcd\xbf\x9d\xa0g\xaed\xdf\xe6\xbf\xefIq\x90\xfa\xd8\xbd\xbf\xf5\x9b\xdb\x15\xc2(\xdc?VX\xfc\x9c\x00C\xe2\xbf{\x85\xc4]G\x88\x89\xbf"\xb4!Z\xe9\x0c\x82?(\xaa\xab\xbb~\xa2\xcb\xbf\xd5F\r\xb0\xe2\x7f\xd9\xbf\x14v\x14tOm\xc1\xbfA\xbbNNF[\xd3\xbf\x81\x0b*j\x9f2\xd9\xbf7\x91\xc9\xa8\xf0\xdf\xc6?\x8b3\xbfz\r\xf6\xe2\xbf26^\x88\x9be\xb5\xbf\xac\x916\x0b\xa1\xbd\xe4\xbfnY\x90\xe1o\xac\xc7?\xa1\xdf\x8f\x8a\xd7\x7f\xe3\xbfv\x88\xb1\xb5z\xca\xdd?\xb7\x116\x9d\'Q\xd9\xbfx$Y\xa9\xc5\xd2\xd0?~\xbe\xafgb\t\xe0\xbf\xda\xfa\x03\x02`Z\xdd\xbfPO\xe0\xf0@@\xe4\xbf7\x80\xe2\xb1$P\xce\xbf\xccl\xa2#Zw\xe1\xbfj\xda\x01\xf7Bo\xe4\xbf\x9d\xf42\xab\x86`\xde\xbf\xe8u]W\x9e\x99\xd7\xbf\xf8.\x14X\xd8\x99\xdf\xbfp%{L\xd9d\xe6\xbf<\x10"\xa7\xae\x05\xe1\xbf\xee\xe1\xc9]\x1d\xfb\xe0\xbf\xac\xc8\xbb\xa6\x1a\x80\xab?\xe1)\xf2\x8b\x97\x99\xe1\xbf\x80S\xde{EL\xd3\xbfR#u?\xec\x97\xca\xbf\xd3\\\xf1\xfe\x8a\t\xdc\xbfV&\x87\xd4\xe1^\xdc\xbf\x85\xf9\xc6\xc7\xa1\xf0\xb9?Y5\xaa\x7f\xc6+\xc0\xbfV,\xc0\xf5\x8aQ\xd8\xbf?1\xef\x9b\xa2\xec\xdc\xbf\x89[ \xd9/\xef\xc7\xbf\x0f\x92[\xbb\x8e\x8b\xd0\xbf\x9c\xbb\x05-\xe5\x92\xd7\xbf\xf4\xe2q\xb5\xc1\x8d\xc8?\xd7\x8c{\xfd\xc5\xc3\xde\xbf\xeb\xdb\xa9h3\xbc\xe4\xbf};\xdf\xcd\xb1\xb1\xdd\xbf\x04\x1d\xbc0\x99i\xbc\xbf|S\x8ep\xc2=\xe7?\x02v\xd9>\x9ay\xc7\xbf^\x1e`\xf8\x1b\xcf\xd2\xbf/\xe3*\x9b\xbb_\xe9?\xaa\xe0\xc1\xc2\xa1i\xd9?\xc8\xc7\xbc[\xf5\x1c\xd7?\x8d\xafO\xfd\x06J\xe5?\xc4\xd4\x04\xa5\x98+\xd7?\xa5RN\x9c\xeb\xf9\xcc\xbf\xa6\x15+\xcc\x8e\xb2\xcc?\xf3\\p\xe9pU\xe6?#\x0c\x83\x9d6_\xc7?^\xd1\xf7\x8d\x8e\xa9\xd9\xbf\x96\xa8\xd3\x9di\x18\xc7?\x9d\xd6\xee\x9d\x8c\xac\xee?\xac\n]\x07\x7f)\xc3\xbf\x0e\xb2\x9f\xecd\x83\xd7\xbf\xa0\x95\xde\xce\xde\xe9\xcb?\xc8\xd7\x81\x93/\xa6\xd0\xbf\xb5cg\x9aV\xab\xb1?\xb3:\x9d]"*\xdb?Y\x93|\xab\x01\xc8\xe6?m#\xbb\xfe\xf4\x99\xb6?\xa3\xf4\xc5i\xe7\xd4\xdb?\xd6(\x19\xd5\x00V\xc0\xbf\xb6*\xe1\x16\xf9D\xd6\xbf\xfb\xe1\xcfe\x19j\xe9?\x000\xb5\xf17\xc8\xd6\xbfAW\x06V\x18!\xed?\xd92\x83\xa2\x94z\xcd\xbf\x0e!Dx\xe66\xe1?yv\x89E\xe1\xf5\xd8\xbf\x97\xf8\x9d\x11\xadn\xe1?\tPb\xf1\x12\x17\xc9\xbf\xc8\xe9\x00:n\xf5\xe6?\xf7\xdco\x88\xb6\xe5\xe5?9\x06\xf74\xff\xc0\xe3?\xa6\x99\xd2[\x14\xf4\xe1?\xc0\xc7\x84\xa2\x15\xce\xc9?f4\xdd\x11\x96*\xeb?\xf2\xc5\xa9\xafO\x08\xcb\xbf39\xc3]\xb3\xa4\xe1?]fi\xb1\xbdG\xe6?}\x14\xf0\x8e\xf3\xa7\xec?\x01@\xb6}i\xf0\xc0?\x0f\xa2\xa9]\x05\xde\xe7?/\x99\x15\x8d\x89,d?\xf3\x07\'\xe0\xaa\xae\xe8?\x96\xc3\x83+\xddi\xe1?%\xac)\x93n\\\xd7?q=\xe2D\x14\xad\xc9\xbf\x8c)\xa4\xacg\n\xe6?\xd0\xe8\x15\xb6\xc2%\xbc\xbf"\xf9KW|O\xd3?\xba\xd5\xd2ND\xe8\xe3?\xf7\xb3\xc8\xd1\xad\xcf\x90\xbf\xc5\x89\xa6x\x17\xe3\xc8?8\xcab\xde\xa9\x89\xd7?\t\x898\x03\xd6\x0b\xe3?\xc2\xab\xcf\x16A\xd7\xd7\xbf\xcb{k-\x87\x9b\xe5?\x95X!:\xacC\xe9?.\x88HU\x94b\xe7?\x0b\t\x00m\xae\xe5\xdc?\x8a\xbf\x19\xfe\xd4.\xe8?\x07\xb9\xa1{\xb1\xa5\xd0?K\xacf\xb3\xb6\x0cq?\x93\x13Q\xf5=\xe1\xea?\xe7\xf7=\x7f\xcd+\xee?\x19YY]\xd14\xc9?\x9e\xf2tTe\xa8\xdf?sk\x0e~\xf7\xc2\xe3?\x87\x86\x99W\x0c\xa5\xf3?p\xe8h\xcfB\xa4\xd4?\x0f\xdc\xaa\x125\xba\xe8?\x91C\x90&\x85\xe5\xd2\xbf\xeeDq\x1eSq\xd9\xbf\x08gz\xc8vn\xd3?\x9c\xfft:\x94B\xcd?\xad\xbeo<[\x7f\xf4?AD\x7f\xbc\xfb\xbf\xe4?\xf3\xb9\t\xba,\x8c\xca\xbf\x1d\xf2\xdd\x97\x06\x8f\xf0?EE\xf3R\x88\xc8\xe9?*\xb2\xe0\x08\x15P\xdd?*py\x19\x1c(\xf0?J\x9a\xb8\xfe=\xbe\xcd?\x8d\xe2\xc0\x19\xa7\xde\xf0?\x02&zP\xf7\xe3\x90?\xac\xc4\xd0w\xc6:\xc6?O\xccve\x08\xe1\xe5?\x0f={@\xa8k\xe4\xbfU\xae\xe1\xfc\xc4\xc3\xd7?\xea\x00e@\xdb\xdc\xd9?\x9e\xcf\xe9\x13\xd3#\xd5?]\xd2\xf4\x82\xf5\x9a\x93\xbf#\xa6V\xa1!\xaa\xd2?\x8a\xc3\xe3\xe5\x1a\x05\xf0?P~\x97\xefjt\xe6?\x10Q1\xfb\xa0\xd4\xe2?JC\xe8\xc8X\xab\xaf\xbfY\xe33\x06\xda\xe7\xe9?\xe94\xa2\xb2\x01\xe9\xbf?\x95\x98Ma\x9b\xc9\xb5?\xca6VXI\xa6\xdb\xbf\xc6\xb3Ie\xb0\x10\xf2?n\xd6\x8b0UB\xe6?\xe26\xb38\xfdB\xcd?\xb4p\x94\xa2m\x19\xb0?\x893\x02h7\x00\xe8?6l\xc0fFj\xd5?\xeb\xd1\xe4\xa0\x80\xeb\xe4?\xf8\xd7\x18\xd7Y\xe7\xe1?H\x1c%\xc8p\x8f\xdc?/F\x12\x9f\xab:\xa6\xbf\xe11\xf1\x12\xe1\r\xe5?\xd5H\x88\xbd\xb0g\xf1?\x11Ow\x84\xa7\x1d\xde?\x00\x1f\x87\x81K\xd9\xec?G\x92W\x0b\nu\xa8?\xfa\xc5\xa0\xaf\xd9\xb0\xf6?\xc0\xd4\x1b\x94\xdf\x84\xf0?c.\xf1\x0f\xdf\x0c\xe5?^\xa6M\xf42\xd2\xd3\xbf\xfe\xb21)}F\xe1?L\x9eTr\xbaW\xaf\xbf\x9b\x8d\x04\x07T\xd9\xe7?\xe3\x05\xf6L\x1e,\xe9?\x8e4\x99xe\xe9\xbc\xbf\x9b\xe4y\x7f\xa63\xdd?\xc6\x14^\xe3\x81\x13\xe1?\x9e}\xaf\xc4\xc6\x1c\xc6\xbf\xab\xa8!\xbd+]\x94\xbf\x08\xfcd\xa4\x83h\xb3?\xef2\x8a\xd5S\xf4\xa8\xbf\x81\tON8\xc7\xda\xbf3-j\xf9\x1d\x8c\xd1\xbf\x83\xadhQ\x9a\xbd\xd5?\x90\xf0\xb9\x03\x85a\xc1\xbfI\xa0\xac\x13\xd9\xe3\xd4\xbf\xef\xfc\xca\x83\x8c\x82\xd3\xbft\xd0/\xa4\x83\xca\xd6?\xc3z9\xa0`$\xd4\xbf\xc75&q\xb4\xcf\xcd\xbf\xc7]\xdc\t\x95\xe3\xa3?\xe2\xc54\xe7zS\xd5\xbf\xbd|\x02\x84P9\xaa?\xf9~\x0b\xf0oh\xd5\xbf\xe9\x01W\r\xc9\x1f\xd3?f\xe25YV\x04\xd1\xbf\xe4\x91\x01-\x82\xe0\xd5?O\xaf\xdd-9J\xb4?\xf1\xe2\xc0\x9d\x8dl\xba?\xe6S\xa1c\xe5\x1b\xe2?\x16\xcc\\\xca\x7ft\xc5\xbf\x9c\xe6;\x8d\x0bp\xdb\xbf\xa6?\xe22-\xfd\xd4\xbf\xe8\x1a\xda+\x8d\x8c\xd6\xbf4XW\xbfAE\xaf\xbf\xe3[\xbb\xebR=\xe2?+|\x0b&\x9d\x00\xda\xbf\x92p f\xef\'\xd3?JAv0(p\xc0\xbf|\xa6:",\x95\xb4\xbfA\x19\xe3\x9d\xd9\xe1\xa4?\xffI>pP\xdd\xa4\xbf\x7f\x1a\xd4FO\xa1b?\xdeu\xeb9?\xff\xb7\xbfh\xfe~[\xee\x9e\xd6\xbf\x7f\x93\x13\n\xa2p\xa0?\xe8g\xbf\xf02q\xa2\xbf\xe4\xc3\x98\xb4\xbd\xd3\xd8\xbfJtmO/\x87\x85\xbf\xc7l\x85ux\x8a\xbb\xbf\x80Y\x05L\x08\x1b\xda\xbf\x13\xa7{\xa48\xf7\xc1\xbf\x94\xe6<L\xccU\xda\xbf\xef\x9ac)\xe0\xac\xd7?]\xc9\xab\x99\x98\xfb\xa6?\xd2=\xe7-9\xdd\xb6\xbfF\xe3G\x17\x15\x89\xd1\xbf\x89]\xe4\xcc\\\xb6\xdb\xbf\x14\xcd\x94.\xe5\xd8\xbe?U \xe0\x07\xf9]\xbc?\x17\xbd\'\xdb\xad\x94\xb4\xbf\xea\'\xaf\xe88\x9e\xaa?\x05_\xfd\xc19\x1d\x9c\xbf\x8e\xe9\xdaR\xf1\xfa\xd2\xbf\xab)\x0f\x91~\xf9\xb7\xbf\xba\xe4\\jm\xe4\xd1\xbf\xb5N$#\xcc\x83\xae\xbf\x92\xdbx\xff\xb2\xab\x8e?\x8d\xbau\xad*\xd2\xde\xbfs\x99\xf2E\xc3\x81\xa5\xbf\x93r\xd8\xd8\x98\xd0\xb5?\xfc\xb8]g\xc3\x1e\xe3\xbf\x97F\x89y\xcd<\xe7\xbf\xf2\xac\xd6`\xe5\xef\xdf\xbf\xf1\xaab/n\xe3\xb0\xbf_\xb5\xba\xe1H\x99\xd9\xbf\xf6\x10\xadz\xe9\xa5\xe1\xbf\xc9y\xb3\xd8\x86\x83\xd7\xbf\xb8c5`\x16\xf8\xde\xbfB\x89\'\xe8]\x9c\xf1?%`\xd08\x0f\xdd\xf6?}\xa1k-\xf5*\xa2\xbf\xcb\xf3\x9f\xf4&\x1e\xda\xbf\x07\n\x9f9\xc1i\xe3\xbf\x01\xbee\xf1?c\xe2\xbf\xf0\xed^\xfd]\x18\xef?\x18:\x98\x13\xeeO\xe3\xbf[\x028\x8d\x8c>\xe2\xbf\xe7\x86\x1a/\x0e\x18\xdf\xbf8\xa9\x19;r\xde\xe6\xbf\x8cM\xea\xce\x1d\xd2\xca\xbf|\xfb~\xa6\x9a\x81\xeb\xbf\xc6\xc8\x08\x91C\xe8\xed?8\x1c\xb8@\xef]\xc7?\xe7\xae\x13\x13\x9f\xeb\xde\xbf\xa9:\xe2\xfb <\xec?\x16\x8c\xe4\x12\xe7\x81\xd9\xbf\x8a\xed[P}-\xcb\xbf\xe4~\xbd\xa0\xfd\xa1\xd3?\x87\xd0\x989lb\xc7\xbfx\x0e\r\ry\xc3\xd5\xbf\xd6Q\xe2\x88\xc7\x88\xe4\xbf\x975\x14]\xcc\x19\xde\xbf\x00\xb1\x04\xcb\x16\xf3\xd7\xbf\xe1\xe5Bi8\xdd\x9e\xbf<\xb4\xa7\x03G\xe9\xe4\xbf\x90\xf7\xca\xcc\xbb&\xe9?\xeb\\\xae^\xd9~\xe0\xbf\x96&\\\xa5\x7f9\xf5?2<\x8eGtY\xec\xbfn\x9c`\xa9\x14`\xd9\xbf\xa5\xa0\xc3T\x03$\xd2\xbf\xc34\x85\xaa\x93J\xed?\xc8MO\x133\xe7\xde\xbf%\x8a\xf1U\xbbj\xb9\xbf=\'l\x8e"\x85\xdb\xbf\x9d\xe2/>\xce\xc2\xd6\xbf\xef\xd5\xf19\x1c\xa5\xd7\xbf\xac\xe7d\x90/\xc9\xee?/O`\nd#\xdc\xbfAaQ\xff\x13d\xe3\xbfp\xb0\x1f\xb12Y\xd0\xbfGZ$.\x82\xd4\xea\xbfv\xab\xac\xd8U\xaa\xeb?=\x90N\x8b\xc5\x9d\xea\xbfH\x07\xf4\x98v\x90\xe9\xbf-\x04H~\xb1\x9f\xda\xbfQr\xc8\xdf\x05\x92\xd7?\x838\xb7.0\xbc\xd2\xbf\xde\x9d\xe8(\x1e\xd2\xcb\xbf\xcd\xde\x9ag!\xae\xdf\xbfJ\xe8j\xfbI\x19\xe2\xbfcE\x97j\x07\xa1\xc9\xbf\x03w\xb8\x03V\xbc\xd8\xbf\x9bID\x87,\xbc\xcf?W\xad\xda\xd3B\xc6\xd1\xbfi\xdaewml\xba\xbf3#\xfa\x1a\xf9?\xe3\xbfV\xbc\xf7F\x9f\xd4\xb2?\xc2\xf4\xcf\x8dg\x12\xc5\xbf6\x07j\x9dC\xbd\xd7\xbf\xfe\xab\xc9\x94\xc0k\xe2\xbf\xd9\xb9sG\xbap\xc1\xbf\xc1\x9e\xb1\x12\xeaY\xe8?O\xcf\x00-@\x91\xef?\x87\x93\xc6\x87\xea\x8b\xd8\xbf\xcc\xa2I\xad"Z\xd9\xbf\x1f\x81\xb8\x81V\xe7\xdd\xbf\xf5\xb2o\xe6^\xc4\xad\xbf\x94h\xa0\x9de\xe5\xe7?\x00\x9cw\x81\x02\x10\xe2\xbf<z0\xefq\x89\xd6\xbf\xfe\xbd\xbe\x98Fo\xe4\xbf\x99\xa2\\\x1b\xf8\xfe\xd4\xbf\x8ai\xdb\xb2\x03\xdd\xdf\xbf\x91\xe7+\xb3\x84\\\xe7\xbfG\xb6\x97Y\xff\x9d\xd6?\xc1o\x84\xbb\x93\xb5\xc0\xbf\xca)\xea4S\x10\xc0\xbf\x84o\x93\xaa!\x06\xeb?t\xaf\xaf\xd4#\xc8\xd5\xbf\x15\x18Z+\x8e\xd9\xaa?$\x86\xa7 \x8dt\xd0?\r!\xfdS0\xa4\xae?J\xe7\x1a\xf63\x03\xd7\xbf\x05G\x0c\x13\x1b\xc6\xda\xbft\xb4z\xb2<{\xb6\xbf~v\xb7\x9d\x86\x03\xb7\xbf\t\xc7\xb5Ur\xa4\xd4\xbf\x18\x06\x81\xe4\xd2\xf5\xba\xbf\x18\x00\xd6q\xbf\xbd\xd3?)3\xb9{5;\xe1\xbfL<\xc6Z>5\xee?\xfaI\xa5-\xb4I\xe6\xbf\xb3\x8eH\xa8\xd5\xec\xba\xbf{\x86}t\xa76\xd3\xbf\xf6\xfe>\x19\xfe\x19\xdd?\xb9A\xfb\xd6\xb2\x1e\xc4\xbfq\x81a:y\xe8\xc3?g\x11\xea}\xf6D\xc0\xbf\xfe\x03\xaaX\x87}\xc5\xbf5\x0e\xf8\x93\x07\xe8\xe1\xbf\x19\x08\x0e\xa9K\xa2\xd6?B\x91fXt\xf1\xc4\xbf\x89\xd2\xcbl\x02\\\xd5\xbf\xaeq>p\xba\x90\xa2\xbf\x850a__&\xe6\xbf\xd2\\+M\x11\xb5\xd4?\x94\xe6{\x9b\xcf\xb4\xe2\xbf\x9en\x87\xb2-l\xe6\xbfk\xfb{\xaauF\xb3\xbf?\xf4\x8b\xb7%2\xe6?\x12\xefa\xe4\x7f/\xa2\xbf\xde\xfb\xc8)\xf1\xe1\xd5\xbf\x19\x9d\x17\xfe:]\xc3\xbf%\xfb\xd3\xbe,\xc5\x9c\xbf\x8e\xc1;\xc5RB\xb1\xbf\x99u|O#\x8d\xd3\xbf+\x94\xa8\x1b\xb0\x89\xc7\xbf\x00/#U\xae\x10\xc4\xbf\xb6\xc7_)\x05\xf6\xd4\xbf\x8e\x88L3ow\xd4\xbf\xf3\xe2\x91\xef5^\xd3?\xed\x1b\x91\xd61\xec\xb1?k\x7f\xacp\xedu\xd9\xbfF\x8a\x1b\xa1g\xaf\xd8\xbfa\x07\xbfK\xf2\xe2\xc3\xbf\xeb\xde>{6\t\xf4?r\xc6I`>\xa7\xf3?l[\x05\xc5F\xc0\xc5\xbfH\xa2\xe9(1\xe5\xd7?\xcdz\x80mI\x9d\xd9\xbfAIh\xfb\x01j\xde\xbfp\xd0\xc96\x82\x9f\xf1?@\x1aVp-^\xdb\xbf\x01\xe6`\xeb\\\xc7\xd4\xbf\xeeE\x0f\xef\xfb\xc7\xdb\xbfXr\xba\x89N\x11\xcb\xbf\xd4NHr\xa9a\xd4\xbf\x0c\x15\x8c/\xb9)\xe2\xbf\x11\xb2\xe0\xb7\x00u\xe3?\xebr\x9d\xa1\xea\xce\xce\xbf\xa2[rP\x9e\xe5\x9b?6\xc8\xbc\x11B:\xee?$\xfb\x1e\xbaT\x01\xd9?\xe3\x982o\xc7\x0b\xb2\xbf\xac\x06i\xefe\x0b\xdd?\xf0\xb7\x8c\x95@!\xd5\xbf\xfb\x1d/\x9b\x17x\xd2?@@},O\xa9\xe1\xbft{\xadds<\xb4\xbf\x1b\x12\x98A|\x14\xb4?\x85\xa5\xcf.G=\xd7?`\xaa/\x1c_\xb7\xd3\xbfthq\xd1\xaa5\xe3?qs\xe0N/\x89\xb4?\x04s\xed\xe5\x16\x1a\xf5?"LShqf\xe2\xbf\xb6\xa3|s0}\xad?\xbf\x9fR\x9b\x99\xb8\xde?4O\x81\xed\x989\xe8?"\xac\xc4)\xdc\'\xa2?v\xbeAX\xe3\x7f\xc2?\x87z\xe2\x97\xbf_o?I\xa5\x9d\xb6\xe3{\xce?\xf7\xc1\xfb\x84\x03\xbb\xd4\xbfJ<\xe6\xbf\xab\x91\xe5?\xe7\xe9\x1a \xd1\x1d\xa9?\xf7\xd9R\xcc\x8e6\xdf\xbf\xb4\xa2\xab\r\xaf\xe0\xc1?\xb9~\x83Z=\x9a\xe0\xbf\x1b\xa6\xabq\xaf\xe2\xe3?y\x17\x0ch.\xec\xe0\xbf\xaf\x90\xbe\x14\xfd$\xe1\xbf\xd1\xcd\xd7 \x0e\x96\x95?]\xf0\xf6\xb6(,\xd3?}\x01C\x9c\xf4Y\xc3?R\x98\xe5\x18\x8a\xa3\xdf?B\x82\xdb=\xc5\x08\x9c\xbf\x96\xc8\x12P;9\xc7\xbf\xc9J\xca\xe1\xc9(\xe2\xbf\x9f\x88K(\x8b\xaf\xce?\x7f\xe0\xe2\x8fL\'\xdc?T-\xfax\xea\x94\xe1\xbf\xe0\xfc%\x86\'i\xcc\xbfE\xcf\xef\xbeu\'\x99?E\x0f.I:\xbf\xe3\xbf:\xbeS\x19\x87d\xc7\xbfv\xa3\x0b\xf2q\xb5\xba?d\x7f\xcff\xc1\xca\xb9?\xcb\xeb\x16K\t\x97\xe0\xbfX\x9d\xe5\xd2\xc8\x98\xdd\xbfL[)\x81\xaa\xb3\xd4\xbf\xb1\xee?\xe3\x02\xa3\x91?N\xac;\xdf\x1eC\xd3\xbf\x87\xa6D\x1a\xc6\x1b\xc1?\xbf\x81\x9f?\xe8u\xd9?\xe2\xdc&\x0e\x1e\xa4\xe0\xbf\xf7\x07o\xe2\x0f4\xd2?\xc5C\x909\xbeJ\xba?\x84{\xcc\xac\x98-s?"\x80d\x94\x9e\x18\xdd\xbf\xf0\xba:\x88\xcb\xfc\xbf?y\x86\x06\x01U\xd9\x96\xbfcv\xc9%\xc4\x1e\xcc\xbf\xbd\t[\x95\xfc\xf1\xdb?o;*\xc9\x80I\xe2\xbf\xc0\x84Nw\xec\xf4\xc9\xbf\xfb\x11N\xcaUC\xda\xbf\x04\xbdw\xebN\xf3\xa0?\x14c\t\xc1\xbb\xa2\xe1\xbf\xe2\xfe\x8f\xbfO!\xe3?\xb8vdR\xd1\xf4\xb1\xbf\x14\x1a>(\x8c\x95\xdb?R$\x8cM\x85?\xe1\xbf\xae\x88\xe1\x14\xe0D\xe3\xbf\xf7\x80\xe4\x86\xf0\x94\xc1\xbf3\xbf\xa1\xdf\x01\x1e\xd3\xbfs\xe0\x83A0\x10\xd7\xbfZ\x87\xef\x1c\xf1\xff\xbe\xbf\x1e{\xe2\xec\xc79\xd6\xbf\xbf\x11\x83\xde\x8d!\xba\xbf+\xc2\x10\x9eu\x14\xe2\xbf\xe0\xfcK\xef\x00\x0f\xd6\xbfT\xd2\xb0\xe8V,\xdc\xbf\xc4\xdd\xcd\x9f\x01\xce\xe2\xbf)\n\xe1\xf1\xb5r\xbe\xbfN\xb2h\xc9\xb0\x19\xe2\xbf\x8d\xf5\xf6.\n\x83\xd3\xbf\xb2\x16\xf9\xeb(\x81z\xbf\x8a\xeegz\xa4|\xcb\xbf\x98)\xe8\xf3\x9d\xd8\xe4\xbf\xd8\xb6wg!\x94\xb6?\xf9\x81\xf1\xedL2\xc9\xbf\xbd\xc7\x85\x1e\x17\xfd\xc3\xbf\xf7\xb4.\x08Q\x8f\xd0\xbf\x1f\xa4,\x19B\xc0u?9\x8c)O\xba\xc8\xa9\xbf\x97kw)!\xa6\xe2\xbf\xc5\x92\x8f\xd9\x01\xf7\x92\xbf\x11%\x8b\xc3i\x07\xe4\xbf\xe2v\xc6\xcd\xce\xe5\xc6\xbfN\xb1\xfai\x81=\xe2\xbf3\x0b\xed\x9d3\xc9\xd8\xbf)~\ts\xa8\x85\xf2?V\x81\x96cwA\xcd?\x9a\x89\xf6*\x1b\xcd\xcc?\x1aM2\x12\x88\xa1\xf3?9+Kw\x00\xb8\xe7?Vn\xdb\xf7\xf4\xc3\xb1\xbf!\x0e\t\xd2\xcb\xac\xf1?\x85\x14\x02k\xbe[\x89?\xf99w\xc5YB\xda\xbf\xf4\xb3\'\xf2\x9bJ\xd5?\xa2\\+\x9b\xb2\x10\xf4?\x83g/\x96\xedV\xdd?#`r\x93\x19\x1e\xbe?\xd4\x1a2\x91C*\xdc?R<m\xa3 \xfd\xc9?!\xc3\r\xa6\xe5\xb9\xd7\xbf\n\xd6\x0e\x87\xf9\x11\xdf\xbf>\xa8\xeey\x18v\xe3?\xac m$\x94\xd5\xc8\xbf~\x1d\x0c\xea\xb0_\xdf\xbf\xda\xdf\xa1p\xec\xfb\xdf?`qiG\x84\xc7\xea?\xa5D\xb3/\x96\x95\xc5?\xe6\xad\x10|\xf0N\xda?x:%\x86>\xa5\xd9?\x7f\x93\x16\t\x99\'\xcc?\x19\x91\x16\xf7\xb2)\xf2?\x9c\x8c\x9c\x11\xf4\xfd\xc5\xbf\xef\x1dLX\x07\xa4\xd3?8\xb6\x06\xa4~8\xdc\xbf\x18/A\xb1\x06#\xf2?\xd6\x9a\x08\\\xcf*\x83?\xa9\xcb\x8a\x9f\x88\x95\xd3\xbf{*|S\x0f\xab\xb1?\xe3\x95\xd8\x1bQ\x10\xf3?\xef~\xc6PW\xd6\xf0?D\xcf\xdaP_\xd9\xb4?\xd6WiC\xb7\xc8\xef?\x13\x9f\xe2\x9e\xce\xf0\xe8?F(\xfb\xd2\xf5\xd6\xbf\xbf\xdc\xc4\xef\x18YO\xc4?\xcd\xfc5\xa1y\xc3\xe3?\x00\r\xa2\xf9\xac\xf4\xf1?H\x01\xf4\x16:\xce\xd1?\x8c\x7fn/\x93\xf0\xe4?\xb4\xe1\xc2\x86\xc8\x14\xf2?z\xf2\xb47EQ\xc9\xbfv\x01\x9f\xc4\xc9\xd2\xf2?L\xabj\xd7\xf5-\xae?#\xd6\x96\xdd\xa3$\xe1?\xe1/\x17hH\xac\xd1?[B\xd2us\x1d\xf0?\xa5|\xc7\x00\x82\x9d\xd9\xbf\xbb7[E\x91dg\xbf>\xef\xfc\x10\xce\xfd\xe4?\x17[@\xb6\xed\xad\xdf?&\xb7\xcb\x90\xdd\xdd\xbc?\x85\xf2\xc4f\xe5\x92\xcf?\x07\x10\rk8\xd3\xef?\xf2;\xd7\xb6HJ\xda\xbf\xa0^\x97p\xfa\xe1\xf0?\t\x1b\r\xce\x9cO\xba\xbf\x8e\xca\x9a\xec\xe3W\xf1?\x02&\x12@\xd3\xe0\xea?o\xb0\xad\xaf\x9f\xde\xd5?;\xb9\x90\x87\xaa\xbc\x9e\xbf\xa2\xbd\xe4Lod\xba\xbf\xf5\xd9\xea\xcen\x1c\xd6?\x08A\xe67\xbf\x94\xda?\xb9\x0bo\x8c\xd9B\x96\xbfY&\xc5\xdf\x91\xa8\xc7?\xbbc\xe4W\xd2M\xdc?Y\xf0c\xe3\xaa\x08\xcf?\xf1H~\xc0\xd2\xca\x9f\xbf\xd4<\xb1S}\xcc\xd5?\x1c \xe9\xaf\xaf\xda\xc0\xbf\xeb\xa1\xfb\xc1\xfe\xb4\xca\xbf\\\x1d\xc6b\xf7\x9d\xad\xbf3ud\x1c\xe9\xca\xc2?C%\xc1;\xee\xfd\xc3?`h\x8d\xb3\xa4\n\xd2?\xf3\xf0\xc6\xb23\xb4\xa4\xbf\x96|\x811\xa8\x19\x9e?\xe9Ac#\xe6}\xda?\xd0\xe0\xd3\xc9h\x01=?\x87>(/\xe9\xa8\xdd?_]D4C\xc9\xa4\xbfy0z\xdb\x1a\x85\xc0?\xc8\x81-\x17?P\xc7\xbf\x8a\xfcG\xed\x07m\xbb\xbf\x8cw\x8b\xf3p~\xd8?\x9d\xaf\xab\xa0\xc4\xc4\xc1?\xccf5\x0by\xd8\xc8?p\x12\x95\xa1\x99\x13\xdc?\xfe\xbe\xbf\x8aI\xf0\xb9?\xb6vm\x06d\xfa\xb2\xbf\n\x1b\x17\xc7v9\xce?\x9b\xd6\x87a\xa7\xe7\xaf?lD\xfa\x7f\x1e\xbe\xd6?\x9a\xb2\x91\xb5\x1b\xc1\xd2?J\xdb\x17\xb5w\x82\xc7\xbfc\xd5\xf7^\xf6\x0f\xda?\x9655\xf8\xf3\xb2\xbe\xbf,\xcft\xe3\xa3\xfd\xae\xbfV\xe4\xf0$g\x06\xc7\xbf\xe4\xceJa\x81!\xc6?\xce\x1b\xff}\x93\xa8\xd2?\xf0\xb9\xd4\xcc\x8c\xd9\xc6?\xff\x08E\xc3\xc7-\xc4\xbf0\x8b\xd5\x00n(\xd5?\x99\x0f\x1c\xe1=\x8b\xdb?\x88\xbe\xc1:\xcd\xd8\xd7?3\xca\xf8\x0b\xe4\x06\xd9?\xf6\x99\x02\x84*\xc4\x8f\xbffx\x95Jz\xc3\xc6\xbf\xd1:3\x9e\xe9\x05\xcf?\xa4\x90\x12x^\x07\xd9?\x15Ha\x1a%\x02\xdd?&\xf8|\xa1\xf5\xaa\xc3?j\x9f*r\xeb\x1a\xc6\xbf\xa0\xfd6\x96E-\xc7?\x068\xcf\xa0b\xc1\xb2?\x8f\xe8\xc5\xd4\x86\xc6\xcf?\xb2\xfb7u\x1f \xd1?-\xec\xb0\xda!~\xd1?f\xdc#wV\x08Q?1\xa8\xa0\xa1\xc2X\xd4?m\xf1\xfbeP\xd1\xd3?I\xc1Y\xc9\xdf\xda\xed?\xe1\x15\x94\xaf%d\x99\xbf\xfa\xfd\x8c)\xad\x1f\xb4\xbfL\x89!\xe8D\x98\xf0?P\x81v"\x10\xcd\xe5?\rjA\xdc<)\xb8\xbfP\x9f\xb7\x86\x94:\xeb?\x1cr\x90\x17A\r\xaf?5\x8a5\x97\x82\x02\xca\xbfo\xb6(g\xff\xe0\xbb?+*\x1b[1\x19\xf1?\xf7\xb2\xde\xff\xfb\xf1\xcc?[\x95\x19\xf2I\x91\xa2\xbfM\xd3\x07\xb5\xcb\x16\xc1?\xa2\xd5"0\x05\xd8\xb2\xbf\xc6\x84\xbb[\x9f+\xc6\xbfW\xe9\xfd~9\x9e\xce\xbf\xdc\x0f\x0e\xcd\xfa\x8f\xda?\x89^n!\xf3d\xb2\xbfA{\n\x9e\xf4w\xd3\xbfTA\xad\x10I\xc7\xcd?2\xe2<\x05\xd9\xff\xe7?\xedv(\xd2\xc8"\x9c\xbf,\x1a]\x15G2\xd6?\xd5\xc6\xaa\xb3\x93\xbf\xb7?\xe7+\xa7t\xbcy\xba\xbf\xe5H\x1c\xbb\x0c\xd7\xee?\xdf\xfe\xbe;\xc9\xc3\xb0\xbf7\x82\x0e?b\x16\xad?\xee\x85e,9M\xc8\xbf\xa9\x03\x18\x99:d\xea?\x8aK\xd4h\x07s\xce\xbf\xf2\x8e\x95\x84^\xcf\xdc\xbfw\xe4\x0e\x9a\x06F\xab?\x02\xcc:\xbe\x92\xc2\xf0?*2[b\xa3\xb6\xeb?\x9c\xfd\xf3y\x04y\xc7\xbf\x064\xe5\x8dn4\xed?`h\xa8z(\x9c\xda?\xabB\x1cz\xdaY\xd5\xbf\x03\xa8\x04\xaf\xf6\xce\xa6?\x88\x92\xe94\xf6\x0c\xe1?\x81\xa0\x97)\xe52\xec?o\x1b\xfa2\x8bKt\xbfat\xc5\xab\x0f\x81\xd6?\x12\xe0Y\x0bU\xff\xec?\xd5O\xfcp\xb7\x8f\x91\xbf\x17b\x8d\xd1\xd0\xe8\xee?\x1b}d\x8b(\x80\xa8?\xc9b\xdb\x0f\xd5\xe0\xcd?M\x95\xd2\xef\xe3\xb2\xa0\xbf\x04\x82#\x9cR\x1f\xeb?.QC\x7f\xb4\x11\xc3\xbfK,\xc2\x1c\x88\x1e\xb3?:\x9c\xfb1\x80\xb9\xdf?\x18\xea\xe3\r\x1c\xed\xc5?\x9e\x97\xa1\xeb\xbb\xf0\xcc?\x8do;\x13\xfd\xbb\xcf?\xc3\xb7\xc3\x92L\xe3\xea?\xb1\xdb\xc3\xbd\'\x03\xc3\xbfX\xfc\xc6\x82\xabw\xeb?\xa2\x8aIpH\xf6\xd9\xbfC\xe6Yo\x98\xff\xec?ET4v7\xb0\xe8?L\xb0D6\x85d\xe1?2\xc9ab4\xb8\xcb\xbf\xd2\xff\xde \xd1\x12\xb2\xbft(\xbf\xf1\xcf\xee\xd6?e\x9c\xc0\xe5\x98\x07\xd3?\x1e\x91\x0b2\xae\xea\xc6\xbf\xf4\xcf\x96\x94\x08\x0b\xe4?p\x93F\x96\xff&\xcf?\xceI\x82\x97\xceZ\xab?\xe1\xf74\xfd\x83\xa6\xce\xbf\xe3\xf1-u\xc1\x8b\xd9?\xe2\xac\xdc*_u\xec?\x9e\x0b\x8d\xa6\xa8;\xec?\xfe\xe0\xea\xf8\xc2\xd9\xbd\xbf\xe4P\xf0\xdaB\x8c\xc6?\x10\x98\x85\xf3\xcd\xa6\xb4?Xv~\x99\x07\xed\xc7\xbf\xe1\xb3\xb0\xd2\x02\xee\xec?\xd6\xdc\xc8l\xfc\x91\xa6?\x8b\xe6A\xb1\xa1\xd8\xbf\xbf\x99`o\xfc\x1c%\xc6\xbf\r0l\xd6\x9b\xe8\xd8?A\xf0\x95w\x1c\x14\xd0\xbf\x05\xf1\xa6\xc1n\x99\x83\xbf\x85\xa0\xcc\xe2b\xdd\xd9?\xe6\xe5\xfb\xea\xfb{\xca\xbf\xb0W\r\xa5\xec\xd8\xdb?\xd1|+\xbf4q\xe5?\x95\xfc\x17\xa4\x19\x1c\xd8?<\xc8\xe0qw\x02\xae?\x91J1\x17\xc3\xb6\xe3?\xa4o(\x99\xa3\xce\xcf\xbf\xc9\x05\xb1$j!\xb4?\xb5y\x82|J\x8b\xb8\xbf\xebRd?\xf0\xa3\xd9?\xf3Q\x17TL\xdf\xe4?\xb5I\x194\xb4w\xa5?\xe4\x92h\xeba\xf1\xd0?\xf7O\xa5tk\n\xde?VxI\x19\x0fR\xb7\xbf\t\xe7\x02\\@Y\xed?\x8c\x950Y\x88\xc9\xb0\xbf\x98,\x8ff\xe0h\xe2?*\x0f+BN\xf8\xd2?*\xf2\x0e_\x19W\xe3?\x8c)\xc9\x0e\xdd8\xe1?\xf1\xc4"\xca\xb6\x81\xcb?\xb8\x12\x90jC\xe6\xde?\x16\xc5+?ha\xd7?\xfbtZ\xc3\x9f\xdd\xc0\xbfv\x8e\xa9a\\J\xd9?f\xcfqw\x19\xff\xe4?O\x17\x12\xbc\xeb<\xb7\xbff\xe6\xd7\x8b\x84I\xd1?\xc9e\x18\x10L\x18}?\xf4\xf49\xe0\xe2\x07\xdb?\x86\x9a\x93\tP(\xad?\xc1A\xb5\xb8m\xd6`?\x022\x94\xd4\x13n\xe5?Z\x1f\x01\x14_\x12\xd0?\xc3\xf7\x81\xdbs\xe0\xe5?\xa6;2\xc5\xdf\x97\xc0?\xb8\x90(73\x8e\xe0?;\xecXhK\xa2\xdf?r\x8d(d>\xa0\xec\xbf\x87\xc7\x18Q\xb1e\xb8?#\x87\x01}\x98\x9c\xca\xbfa\x18tL\x99$\xe9\xbfrB\xb4\xbd`k\xed\xbf^ \x80\x9cJ4\xd4?\x93\xb5uf\xbf\xca\xec\xbf5c\x04v\x7f6\xe0\xbf\x1c\x96\xc1#C\xdb\xd1\xbf\xe9\xb9\x00\xb0\xfe\xec\xc0?X\xefA\xcb\x08\xe0\xea\xbf\x1a\xf0\xca\xf0\r\xf9\xe0\xbf\x04\xe5\x19U\x19.\xde\xbf\x80X\xd3[\\\xc8\x87?p\\\xac\xf4\x17\x97\x99?\xec\xedL,\xb6\x9b\xcc\xbf\xb0\xea\xf8!u5\xd4\xbf\x01\xd7\xa79\xde\x94\xe7\xbfP\xf0\xcbf\xf4\xa9\xb7\xbf\'\x7f\xab\x06\x10K\xc7\xbf\x9a\xdf\xd4\x95\xc2\x06\x94?\x92\xb9\xa3+>1\xeb\xbf\xd5z\x8b\xba,\x86\xcb?\x15#-y\xb1a\xd1\xbf\xc5n|-\xe4\xb1\xd4\xbf$\xfc\x98\x8bU\xa1r\xbf\xa9\xac\xac\x97\x88!\xeb\xbf\x12\xf3\xb4oYP\xdd\xbf\xe0\xa9czL\xc0\xcf\xbf)\x98K!\x08=\xd7\xbf\x8e/p\xf7\xacY\xea\xbf\xef\xd0\xfaO\xfdL\xa0\xbf\xdd_\xbd\x12\xb3\xd1\xb5?a\xca%\x0e\xfd@\xd1\xbf\x17\xa9d\xf0\xf5\xcb\xeb\xbf_y~g\xfcx\xee\xbf\x8fp\x16\xd6\x12\xc1\xd2?\x8d\xd4\'\x9f\xcd\xd7\xec\xbfEjJu\x86p\xdd\xbfy\x12\xb4\x9c\x15]\xda?#\xf9\x8a\x91j\xfb\xdf\xbf\xc3\x1e1\x83\x0e\xb4\xd3\xbfB\xbfO\x0c0\x96\xec\xbf\xe4\xecw\xf8\xaf\x1b\xb6\xbf\x7f\x17n\xfc\x93\xe2\xe1\xbf\xfa\x122J\xae\x03\xec\xbf;\xefT\xf5\xad\xd6\xe0\xbf\x9e\xb9!m7\xfb\xeb\xbf\xc1>\r\xed\x84\x01\xe1\xbf\xf3\xce\x10\x7fp\x9a\x96\xbf\x12F\xed\xac\xcd?\xc9\xbfF\x8c\x03$\x1e\xa0\xee\xbf+s^\x19\xa6Y\xd6\xbf\xfd\x05\x83\x9dd\x1d\xe2\xbf\xfd\xfdn\x11P\x90\xd3\xbf\xe1\xbcQqN@\xd6\xbf\xccfr\xbc`d\xdd\xbf}f\xc9*\xcb\x86\xce\xbf\\\xd0\x91g\xa1B\xf0\xbf\x08\xd5\xe2G.\x05\xdc\xbf-\x10h\x06Q\xb4\xee\xbf\x0e}\xaf\x0b\x9do\xd2?\x07\t\xa6r\xa9\xf3\xec\xbfZ/o\x93ux\xf0\xbf\r\x987\x18\xf6)\xe5?a^\xde\xbf\x11q\xb2?%\xaf\xc6d\x81e\xc1\xbf(\x88\xe2\xdf\x11\xf4\xe4?3\xf7F|\xc2T\xd1?\x84\x9d8}\x18*\xe0?\x8d4\x10\xfb\xf70\xe9?\xae\xce\x94wl\x1dx\xbf\xd6\x97\x075\x82c\xa9\xbf\xf7\x0b\xd5\xae\xd7d\xd9?%V\x97\xb9}C\xe2?$\xb0\rH\x02\x9e\xda?9L~t\xda\x9c\xc0?\x81C\xe1\xb2(\x8a\xda?fvA\xac\xc4Q\xe4?x&\x95\xde\x941\xbb?\xe4i,V\x01\xf3\xdb\xbfl\x85\xb1\xc4\xab\xf0\xd9?fx\xee\xdaQ\x1b\xc8?\xed\xabD\xf5\x1ea\xce\xbf@\x8cL\xd5qO\xe1?\xaa\xaa\xa4\xac\xff\xd0\xdc?5\xe3\x101Ij\xd2?\x04\xd6lU\x8f,\xe3?\xf8\x8b\x80\xd4\x949\xd7?\x06\x08\xf1O\xd4\xe0\xb7\xbf\xf3\r<\xa3JY\xe7?\x14\xa5\xc5\x9c\x15=\xd1\xbfu\xb5\x94$\xfd\xf1\xe3?\x93\x17\xfd\x8d*I\xde\xbf\xea\xc4R\x1c\x05\xdd\xe5?\xb2zW\xd4\xbeK\xd2\xbf\xad\xb6\xfd#\x7f\xe6\xc2?\xea\xdb\xb2\x16&\x1c\xa2?O\xe1\x89\xbb;B\xe5?NK\xea\xeb-\xda\xe6?n\xd4\xb5\x1fik\xe5?\x82\xbe\x82H\xe4C\xdb?\xc5\x0c\x12\xd1\x84k\xdf?#\xfd\xcb\xb5b\x97\xe3?\x9cW~\xad\xb9m\xc9?C\xf1o{\xa4M\xe4?\xe0\x9a\xeb\x14\x14t\xe6?\x8cg\t\x0f|u\xe1?\xf4>%*e\xf7\xe1?>f\xb0\x8e%y\xe6?,YA@%v\xd2\xbfV\xc1\x8ff\xd7\\\xe6?Rno\x11\xfa\x0f\xca?\x9c\xa3J\x9e,\xde\xdf?\x16\xa6\x99Nd\xc6\xd4?D\x11\x03\\\x18\t\xe8?\t;\xae0\xf7\xf1\xcb\xbf3\x01\x8e<\x9cA\xa6\xbf!p\xcdg\x8cv\xe7?\xb3\xff\x0b\x8c\x03\x87\xda?\xb0\xa5w8\xafR\xd9?\x07\xcf\xc3\xa0\t0\xe3?\x08\xcd\x04\xc6\xab!\xe5?a*\xb0\x0eSL\xdd\xbf\x15;v\xcb\x83\x14\xe7?\xbaGy\x0f\xf33\xe0?:\x02q)\xc2\xc2\xe7?G\x1e\x80y\xf6\xcc\xda?\x96\xca\xa2O!9<?\x92\xd0x\x81sZ\xcb\xbf\xe3\x15\xe3\xd9\xc4H\xe6\xbf\x81\xb7y\x84aX\xac?cN\xf7\xe0M\x9b\xcf\xbf\xf7j\xc1\xb0\x91\xbe\xf1?\xc1;>A~\xd0\xac\xbf\x02&\xb6z\xcd`\xda?<\xa2O\x93\xb5\xe0\xd0?\x9cDh\xa8\xd3\xe2\xd5??\xb6\x0f\x94\xbb\xa1\xca\xbf\xd6\xe1jmi\xa1\xaf\xbf\x81Z\x02\'\x86"\xdc\xbf\x9c\xfc\xb2j\xbe6\xb4?vB\x16&\x13\x14\xf6?\x03%sd\x08l\xdc?\xec\x89\x04\xd6A\xa1\xd1\xbf\x11`\x16\xfa\xa1\xb8\xc6\xbf\xbb\xdb&\xe0:\xa3\xd5?\x96)\x8f\x07\x9b4\xe1?\xbd\xd3\x0b>\xc9*\xdb?\x1e\xe8\xb6>c\xd4\xc9?KI\x7f\x8c<\x0f\xd4?D\x17\xbb\x9c^\\\xe4?\xce\x18\x17\xbc:\x92\xd6\xbf<F\xf2y1!\xe3\xbf\xcc1\xf35\xce\x9f\xa1?\xa8\x0f\xfbL\xc2`\xd1\xbf:\x19\xc5h\x0f1\xf4?\x8d\xf1\xbe\x0fl:R?\x9c\x95\x7f\xfc^\xee\xd2\xbf\xb9\xb60&\x97&\xe5\xbf\x81\tWo\xf5<\xf3?\xf05\x1b\xfcUh\xd4\xbf\xbb\x8b\x9c\xd5\xb4\xa1\xc5\xbf\xd2\x1a\xc4\xf8\xecj\xb4?b M\x16b\xfc\xf1?\x8c\xb7\xa5\xc9 \x0e\xd6\xbf\xd08\x19\x00\xdb\xa0\xd5\xbf\x0e\x80g2\xcb\x9a\xfa?\xb1\xb3\x0c\x8e\x92\xf5\xd2\xbf\x99\x19\xeb\xd4\xba\xd3\xe0?M*\x9b\xf4\x1f\xb9\x84\xbf\x8fd\xd1\x1c\xc3i\xf3?P\xaf\xc7&E\xb0\xd2\xbfj\x12\xb8\xcf\xbd=\xb5?\xf53\xb7\x98.rt?\x1d\xbf\xcb\xb8(\n\xa6\xbfj\x94\x9e\xeef\x84\xe5?\xcf\xe7\x08\x16\xef\xd3\xd0?\x14\xd6\xfdi.\xf9\xcd\xbf\xb3`\xdd\xc6\x96\xb3\xcd?\xb8\xc5\x1f\x1dj\x8c\xc8?\x1b\xc3~\r<C\xd1?\xe2\x89|/\xcdZ\xe3?\x1e\xc8\xe49#$\xd3\xbf\xe7U$\xa9\x94A\xdc?\x1d\x12\xcf\xcf\xe9\xe8\xe8?$\xd3\xcf\x9a\xdd\xdf\xad?\xfe\xf8 j\x03\xd9\xcd\xbfg\xb6\xab\xd0$\x1b\xb3?Vvn\xb7\xa8\x87\xf7?H\xa0<\x11W^\x92?\xfc\xe5\xd3l]\x11\xc5\xbf\xa2|\x12(\x83\x03\xdb\xbf\xa6\xda\xc2\x0c(\xe6\xd3?\xb0f\x17\xef<g\xc1?\xd0?\xb1M\xa9\xd9\xd6\xbf"\x8c\x04Jm7\xd3\xbf\x8d\xabZ\xa2\xe4c\xb4?\xfaSA\xb9\x13\x9a\xda\xbf\xceq\xd0)\xb8\xa0\xd8\xbfl_\xd2\xc1i\xad\xaa?S\xfd\xc9\xe2)\xec\xca?\x03n\xbe\x1b\xc5A\xd5\xbf\xa26\xbd\xf9y?\xe2\xbf;\xc0h\x10Fr\xd5\xbf\x83\x9f\xb9w!.\xc4?\xde\xb1\x0ef}U\xdc\xbf\xaa\xc5\xfdSy)\xa8?\x8f\xb1\x0b\x85Q/\xb8?\x96f\xcb\x1cy\xee\xe2\xbf\x9e\x90h.\xd2\xde\xc3?\x10_\xe07@6\xba\xbf\xf3b\xee\x8a\xc8\x1f\xb9?\x9a\'\x96\xd4\x96\xc9\xda\xbf<\xdbAe\x97\'\xce?\x7f\xf4\xf5\xdb\x1d\xa4e?\x951\x18$\xef\x8e\xb3\xbf`\xa5\x9a\xa6\xcd\r\xd4?\xa3+(\ti\xb0\xd8\xbfS\xe05Z\x94\x97\xda\xbf(j=\x9d\xe2!\xe1\xbfs(\x17\'\xdd\xc2\xc1\xbfe\xfc\x84\xe9u\xa5\xd8\xbfV\x8e\t \x87L\xd1?\x8f\xf6\xe3\x05a\x17\xd4\xbfj\xf5\xc5\xac\xf9\x13\xc4?\xb5\xab\xba\xd2\xe5u\xd4\xbf\x19o\x83\xbb}f\xdb\xbfK\xb1u\x1c\n\x02\xbe\xbf\x87\x0en\xd6d\x1e\xcf\xbf\x80[]\xd9\x96\x7f\xca\xbflC\xe5~\xc3\xda\xc4\xbf\x93\x8c\xc5T|#\xde\xbf\xd8U\xd7\x91\xaa\xa4\xab\xbf,#v\x92\xb1\xbd\xda\xbf\xcc\xaaq\xf4\xae\x14\xe0\xbf\x8b\x1a\xcf\xbc\x84\x02\xd1\xbf\xdc:\xc7\x10\xd6M\xdc\xbfToLID2\xd3\xbf9\x99\xe6\x93\x90\xe2\xd8\xbfH\xf0\x96\xa7\xf3\x95\xde\xbf\xb4\x15\x058\xfc\xbf\xbb?\x8f!\x18\xe5\xa7`\xb3\xbf\xd3\x85,:\xf4\x03\xdb\xbf\xb7\x8ba\xff-\xd1\x88\xbf\xa4\xf9a\xf5\x86+\xd9\xbf^IA:\xacT\xa8\xbf0\x98\x13\xbe\xeft\xbe\xbff\xc1\x8e\xae \x87\xa9\xbfb|\'"\xc6\xfa\x84\xbf\xb8\x8f\xec\x01\xc1E\xd9\xbf\xe3z\x9c\x9b.\xce\xce\xbf\xad\xb2.1\xfd\xc9\xdc\xbf\xbe\xad\x97{\xd3~\xd5\xbfO/\x03\xf7>T\xd8\xbfE\x08U\x8eU%\xd6\xbf-;;\xc0x{\xe6\xbfa\x9e=\x02x\x07\xdd\xbfL\x14\xa5*\xc0b\xd3\xbfK\x01\xa9"(\xf5\xe4\xbf\xae\xa8\xc7\xe7\xda\xce\xd2\xbf\xea$\x85\x82\xd1j\xe1\xbfy\xb6Z\x834!\xec\xbf\xaazPq\x8c\xff\xd6?\x10\x1e\xe4\x077o\xd2?\x12J\x11\xb2d\x0b\xe4\xbf\x07j[\x15\xcai\xe4\xbfiK\xa2\x96\xc3\xd1\xe3\xbfQv\x08\xd95Z\xd9\xbf?\xa7\xadC\n\x1f\xe6\xbfL\xdd\xa2\xb1D\xa2\xcb\xbf\xe9\x87\xdbo\xca\xc0\xaa?J%i\x11nK\xde?\xa7\xc2\x14A\xab\xd2\xe3\xbf\xc5\xe7\x8c\xc0t\x95\xd3\xbfU\x82\xf4\x812\xc4\xe4?\xef\xa7d\x9b b\xe7\xbfbM(Jd\xfe\xd1\xbf\xaa\xe0\xd12\xab\x80\xe1\xbf\x88\xfa?\xa0\x0b\x86\xe4\xbfYiJZ\xd4\x04\xe6\xbf\x0f\x04%\xc0\x9b\x08\xd8\xbf\x13k\xbfC\x9c\x96\xe4\xbf\xabp\xa6JY;\xcb?.r\xa0\x8e\x87\x1f\xd0\xbf\xbf\x1dv\xef\xda\x86\xe6?\x01`\xb2\xa0\x16T\xec\xbfn(k~\xe3\x1a\xbc\xbf\xde\xaa\xb8\xb28\xfe\xd4?)\xe8\xa4\x00\xd2\x9e\xd0\xbf\xd2\x8d\'\xe54\xce\xe4\xbf\xa2\xa1\xe9\xa9\xd8[\xe7\xbf\x16\xff8\x86/\xc5\xe4\xbf\x0e\xba@\xa9\xd8\xd9\xdb\xbf\x9b\x94+c\xe6&\xea\xbf\xac\xfdt\x8a\x17\x15\xd5\xbf\xe6Z\r%\xd8\x8f\xda\xbf+\xa8\xbaV\x8aA\xe5\xbf\xc4\xf7\x14\xb4\xad0\xe9\xbf\xfb+\xf6\xee)\xd9\xc6\xbfF\xcf\xa6vu\xc9\xea\xbfq\x98?G\xbbf\xe7\xbf\x90\x95\xf6\x95<\x06\xe1?C\x17V!\x0f\xd3\xe5\xbf7\t\x9b\xf1\x9e\xcd\xc8?\xce(\x90\x9f\xa3\xf9\xe7\xbf\xab\xeb\x94\xca\xb5\xdc\xe3\xbf\xa6\x07F`\xcb\x82\xe7\xbf\x92\xc2\xc4\x9b\x99(\xe1?B\x83\xa7\xb1\xa4\x89\xd8?\xa1\xcd\x1a\xec\x8f\xae\xe8\xbf\xfd\x82\xbeA\xb1\xcc\xe7\xbf#\x19v\x87\xa23\xd4\xbf\x9b\x08\xe0\xa5\x9bV\xe3\xbf\xf6u\xdd\xf3\xe9\x95\xe6\xbf\xd5\x0c\xad\xc1z\xa9\xdc?\xa6@\xb0\xf2\x10\xc9\xe7\xbf\x0f/\x03(\xd8\x1f\xc1\xbf\x92|\xb6%\xb8\xe8\xe7\xbf\xc2\x10\xf8XB\xb3\xdf\xbf\t%]\x8f\xaaQ\xd0\xbfK\xe8\xbc\x8b\x10\xe7\xca\xbf\x12\xe1J\x8f\xac\n\xd1\xbf\x84e\xbf\xd7\xe0\xe1\xc9\xbf\xb8\x03E\x129\x93\xb8?\xc1\x96\nN\xbf<\xd0\xbf1g>\xc7[W\xda\xbf\x11T\xa5^\xb4\x95\xd3?\xcc\xb0\xa6S\xd3s\xc6?w\x15\x8f\x15I\xcc\xd2\xbfA\xe8h\x10NI\xc6\xbf\xd4\x12\xef\x81\x08N\xe1\xbf\xa7c\x13\xe5\xa9\xc5\xd8\xbf\x074\xd9V\x9f\xb8\xd7\xbf\x0c\xc1xnS\x81\xd7\xbf\xf2\xdb\xab\xaa\x8c\xc7t\xbf\xfc\xa5\xf8 b\xc1\xe0?\xec\x9c\x04\x0b\x0cI\xdc\xbf<Q\xd0s\xb4\xe0\xca\xbf\xa1l#;W\x8d\xdb?\xbd\xe5\xb8\x8f=\x15\xd9\xbf\xf3\xba\xd1^I{\x7f\xbf\x1d\x15\xbe,c\xa5\xce\xbfL\xa33\x02\xda\x97\xd4\xbf\xe2&\x18\x85\x8f\xba\xdf\xbf\xb4\x14\x14\xd8\x0f\xa1\xd3\xbf\x88\x88\x0f\xbcz\x11\xc7\xbfx\xf1\xd3}\x1c\xbb\xca?\xe3A\xaf\xb2\x14\x82\xd5\xbf\x18Z\xe8\x9c\x1dY\xe4?\xa1\x06)K\xd2$\xdf\xbfeW\x11\x1dB&\xbf\xbf\x9c\xd5\xcb\r\x01\x95\xa5\xbfa(\xedU\xcd\xff\xca\xbf7y\\\n\x911\xc5\xbf\xdf\xc0\xf7\xc1#\x8c\xd1\xbf2:}\xf8\r\xdb\xde\xbf\xba\xe7\r\xdc\xa0\t\x91\xbf\x0c1\x03\xb6\xbd\xa1\xe2\xbf\x7fY1\xc7>\xd0\xd7\xbf\x94t\xa4\xe3\xed\xac\xd9\xbf:\xd6:J^\xe6\xd3\xbf\x90\xac\xd3\xacT\xfb\xd2\xbf\x88\xc3\x1e\xdd\xa2Q\xd4\xbf|\xb6E\xe3r\x04\xe3\xbf\xcd`\x95\x80\xbfg\xcf\xbfq\x91yf)%\xdf?\xe4\x9aG\xed\x97\xcb\xca\xbf#\xc6\xd3oJ\xb1\xb6?\x95\xec\x0b\'\xd9y\xda\xbf\x85\x02n}\x99v\xdb\xbf\x80\r\x08\xc8*\xf6\xd3\xbfrA\xa7\xad\x95\xfc\xdb?\xb3\xb5X\xdc~F\xd5?H\xee\xa2H\xbd\xa5\xd6\xbfc\x1d\xee\xb6\xe72\xe1\xbfOI\x06\x99\xef0\xc3\xbf\xb8\x84~\xber@\xd5\xbf\xc3g\x82\x92^n\xd0\xbfu\xfc\xa1\xfd\xe0\xe8\xe1?%\xf1\xb9\xf6"\xb2\xd2\xbfN\x9d\xe1\xf4:\xa0\xd8\xbf-vX\xf7,\xd2\xd0\xbf\xf0\xca\xccS\xe4`\xbb\xbf\xccR\x9f\xb2s\xde\xe5\xbf&\xa0\x88\x84u9\xc0?\x9aJB\xb71\xa9\xbe??r\xf1\x0c\xc8\x90\xe6\xbf^\x9c\xdf\x88\x03F\xe0\xbf\x94\xe6\x11)\xc7\x98\xa8\xbf\x9d\x02\x04M\x94\xbf\xe7\xbf?\x93\xbdW\x92\x11\xe1\xbf\x89\x1c\x82\t\x16!\xb0\xbf\xbe\xcf\xe2",\x88\x9e\xbf\'\xf8k\xa5b\xc1\xe5\xbf\xf48\x1b\x0b\xf3F\xe5\xbfQ\x8d\xf6!\xb24\xda\xbfv{\x06\x04>\xde\xb9\xbfe/\x01\x1e\xa3\xf2\xe3\xbf\xd2\xda\xdd\xb2L|\xb2\xbf\x0e*I\xae\xdcK\xbd?\xfcf\x83\x97\x92\xfc\xe6\xbf\x1c\xc1\xc8\x161\x95\xa2?\xae0?u\x12\xb6\xc8\xbf\xb1\xf9\xb6"|\xe5\xbd\xbf@\xba5\x96\xf3\xf5\xe6\xbfNj\xfc\x88\xc8M\xab?,\xba\xee\xa0i1\xd2\xbf\x1f\xd0\xe28\xca\x18\xd3\xbf_)\xb0\xc6R_\xc5?\xd9\xb2\x8f\xf3E\xdc\xe8\xbf\xee(t\x97?G\xd6\xbfg\xc0x$\xdfS\xe6\xbf\xf3\x7f\xd3\xc7\x00\xa4\xc3\xbf\xd1\xf2\xf2D\xdf\xb6\xe8\xbf\xb2\xbf\xf9_\xa6{\xd5?:\xff\xcdC\x1a1\xdb\xbf{K\xee\xcd\xdc\xcd\xb9?\xf7\xfe\x08S\xc3S\xe7\xbf\xfc\xec\x02\x85\x00\x96\xe6\xbfjw\xf5\x8f\xca\xf5\xd3\xbf\x86\xb4\xf5xCv\xe4\xbf\xe4\x85\x05\x7f`%\xe0\xbf\xae\xa82\xfdT\x01\xd3\xbf\x04\xa5t\x9f\xbb>\xe0\xbf<1\x03rB\xa8\xd5\xbf\x85}\x0b\xf7\xf56\xe5\xbfoca\xef\xab\xff\xe5\xbf\xa7=\x02\x01M\x05\xe1\xbfcu54\xa3\xfe\xe5\xbf\x0eN)\xc3\xb7\xec\xd6\xbf\xdb\xa2\x80\xed\xa3\xba\xe8\xbf\xa9\x1e\xd5~Ni\xe4\xbf@b\x8a\x00-m\xbe\xbfE\xf3?R\x83r\xd0\xbf\x8b\xed\x06R \x10\xe5\xbf8.\xc3\xf7\x991\xbc\xbf\xc6\xd9Y%\xe62\xe1\xbf\xc0\x13\xf4\xe7N\x7f\xd7\xbf\xbe\x1e\x1f\xbfcS\xd7\xbf\xd4\xcb\xf1W\x0fj\xcd\xbfb\xda\xd2_\xd6\x94\xcd\xbf\\\xbe\xd4T{c\xe4\xbf\x86\xb5\x08e\xd8\xb4\xc5\xbff\xe2\x15\x04\xb8\n\xe7\xbf\xf71\xd4\xcel*\xda\xbf\xef\xe5\r\xf2\x1e\xb2\xe5\xbf\xd1d\xdc\xce\xb2\x8b\xe1\xbf'
p15
tp16
bag2
(g3
(I0
tp17
g5
tp18
Rp19
(I1
(I20
I64
tp20
g12
I00
S':j\xb5\xaa\xceO\xa2\xbfgp\xa3\x04\xdc\xd7\xa1\xbf\xd1\x1b{47\xca\xd7?\xbfaH\x10D\'\xd2\xbf\x93pMc\x96&\xdb?\xfeB:\xaf\x01\x81\xa7\xbf\x83\x92L\xe2B\x91\xd7\xbfd\xed\xc1\xe5\xb4\x84\xcb\xbf7\x91\xb41L\xa5\xd7\xbf\xfb:e(\xba9\xc7?\xfb\x992G\xff7\xc4\xbf\xb2\x86\xaf\xbc"2\xcd?CM\xee\t*\xf7\xa7?!z\x8a\xc6\xf7\x98\x99\xbf\xa3\xcc\x8c\xea\x83:\xbb\xbf\x17k\x13\xa6Ic\xd3\xbf\x9aO\x1cB\x1c\xfb\xd7\xbf\xec\xfb\xf0\x92\xf2\x8f\xd2\xbfx+i\x9c\x8b\x8c\xdb?V6B\x19\xfc\xac\xd1\xbfm5\xd8\xe8\xfd\xe5\xda\xbfA=\x07\xef\xcfo\xc3\xbf\xc2{A\x9f\xe1z\xd7\xbf\xc8\n\xf2\xefy\x95\xb7?(\xbc\xbf\xe14\x10\xc1\xbf\x8f\xcc\xf3\x06\x0f\xba\xd8?\xb8f8yMP\xd2\xbf\xd7\xcd\xc5\xcca\xed\xce?7\xb28\x1b\xc8\xba\xc6\xbf>MD\xdc\x1c\xf3\xd3\xbf\x9f\xa3\xdf\x91\x84C\xdb\xbf\xe5\xd4zVi\xe5\xd6?\xaf\x808\xc6\x81R\xd0\xbf\xe5\x82\xd3"\xefK\xd1\xbf\x1d\x7f<\xf3\tJ\xdc?\x04\x86\xdcY!\x18\xd5\xbf\xb9\xfd\x8f\x8cN6\xda\xbf\x02\xeaf\xcf\xcba\x85\xbf\xc3f\xf4\xea\xa5m\xb9\xbf\xed~D\x14\x05\x1c\xb5?\x0cH\xd8\xc4\x83\x8b\xc0\xbf\xa9ZO\x9d\xa98\xd3?\x84[d\\Jo\xac\xbf\x12\x00\xe8\xbeof\xd1\xbf-\xdcJ\xa7?\x05\xcb\xbf\x93aj\xe3\xdb\x1c\xc9?N]\xe8\x8eh\xe6\xd2?\xd8\xca\x94c\x05E\xd3?\xe8\x8d^\xa8\xb3z\xd4\xbf\x8e%\xdeaL\x1f\xba\xbf\xb3\xcd\x01\x14\xedk\xd9\xbfF\xd20_3\xb7\xa6\xbf:\xedA2j\xe8\xe0?Gr\xc6?\x87\x93\xc3\xbf\xb6U\x1b\x99\xd7\xb7\xd6?\xb3=5\xbd\x0b\x1b\xda\xbfY\x8fW"\xb4\xa6\xd3\xbf\xd9\xea\xaa\\J\x9c\xd8\xbfv#\x10\\\x89|\xc9\xbf(\x10d\xb3LK\xa1?\xb9!7\x86P\xcf\xcd\xbf\x06M\xef\xba\xbb\xf5\xd2?\xc5E\xa4m\xb0\xa1\xd9\xbf\xdd\xab\xcc\xb0\x1d\xd7\xd6\xbfX\xda\xcb\x92>\xb3\xb4\xbf\x89>\xda\x95\xb0P\xe6\xbf\xd3X\xa4\xddX6\xc7\xbf\xf2~|\x0f\xf8\x85\xda\xbf\x12e\xab\x9d\xb9y\xc6?\x88\xe5|jmx\xdb\xbf\t\xf2\xa9\xe2pi\xe7\xbf\x91\x9e".\xeb\xd6\xde\xbf\x93\xdc\xd8.\xe1O\xd5\xbf\xbb!\xdd+y\x1a\xe5\xbf\xf3\x94\x89\x8f\xca\xa2\xcb\xbf<\xb8\xaa\xecP\xfc\x93\xbf\xe9\xe5\xa5\x9e\x10\x9d\xe4\xbf\x10\x92\xd6F+\x8c\xd9\xbfma\xc3\xc9\xf7\xac\xd6\xbf\xcd\x96W\xa3\x01\x80\xde\xbf\xe2\xd8\xd2l\xee\xe4\xd2\xbf\xe5\x15\t\x01k\xcd\xe2\xbfja\xdd\x80ZA\x92?\x9d\xeam\x7fK\x0e\xd2\xbf\x95w>MC\xfb\xde\xbf\xffD\x90FF<\xe8\xbftN-%Y\xd7\xd5\xbf\xd4\xd4\xb0J\xfd\xdd\xbd?\x03\xcc\xfd\x0b\xae\xc8\xe3\xbfk\xe7\xc7}}\xf4\xdf?\x14\x81\n)\x86w\xe6\xbf\xb0\xbf\x07\xdal\xce\xc0\xbfa\xcb\xeb\x12`\x17\xe0\xbf7_\xf7\x13\x86\x9f\xd1\xbf\xd6Au\x1au\x11\xde\xbfm\xfb\xb3\x95\xce9\xdc?\xfa\x11\xb5\x9b\xf4F\xe0\xbf[BG\xe1\x08\xf8\xe6\xbf\xb6\xee\xbac\xda\xd1\xd5?\xb8im\xf9\xbb\xc9\xd2\xbf\x01\xbe\x96`9\xfa\xe0\xbfi.\xe3J\x04\xcb\xd8\xbf|\xca\xe2\xb9\xe9\x8c\xe4\xbfz\x88\xc0\xf9*\'\xdc\xbf|\x99L\xf6:r\xd3\xbf\x01O\xcc\xf3P\xe1\xc2?\x15\xfc\xbd\xc8O\xde\xe5\xbf\x02`\xccrX\t\xda\xbf\x10\x93y\xdd\xba\x0e\xde\xbf\x12\xee\xc0\xae\xb2a\xc3?\x927\xce\xee\xa1\x97\xca?\xebd\xc7\x84\x07\x18\xcc?S-\xff\xb4\x08\x8d\xd7\xbf0\xfd\xc1\xc2\xffs\x82\xbf\xc4\x99\xd3\x96QT\xdc\xbf\x13*\xe7\x8d\x1fw\xe4\xbf\xf8\x15\xe7\xffHR\xc0\xbf\xc0p\xf59\x91\xfd\xdf\xbf\x1d\xd5:\'\xfd\x8f\xa5?[\xd4\xb1}\xed\xdc\xe0\xbf\x98\x19E\xdf\x8c\xee\xea\xbfL\xbf\xddV\xe2\xcb\xdc\xbf9\xc5\xf1\x01I\x12\xdf\xbf\x85x\xeb\x92\x97)\xb1\xbf\x83\xf26%x\xe5\xd0\xbf\xda(AV\xa9\xea\xbe?\xec\xed\xfc\x8f&\x97\xda\xbf\x9d\xd5\x85\xc3\xf1\xe1\xdb\xbfWw\xf4\x07A:\xdf?\xc9\x9a\xc5QE\xef\xea?\x7f\x14\xd9\xeaQDh\xbfL\xd2\x14\x00o\x97\xd2\xbf\x10\xdd%\xb7/\x1c\xcf\xbf\x92\tN\xbb\xaa\x84\xe5?\x8a\x15\x9a\xdcT.\xe8?y\xed_\x00s\x88\xcc\xbfd\xa4\x99L\x11\xa2\xee?\x7f\xa0\x0b\x8b3\x98\xe9?\x80*\xc9\x7f\xb9D\xe1?n:\xb8\x0c|\x08\xc0?M\xa6\xbc\xf3\x8c\x93\xec?J\xe4\x80\xb2\xbe\xb1\xe8?;w\t</F\xe1?\xf6\xd5SH\xfc\x16\xc9\xbf\x1e\xf9r\xe8)\x80\xec?\xba\xac_y\xcd\xc5\xea?\xdf\nLo\x19\x96\xb7\xbf\xde\x1b\x00\xff\xda\x96\xe3?\x92\x14\xce\xa5\x95C\xe9?7\x1dS\x11\xd3\x97\xef?\x99CMo\xf1\x85\xea?\xde7\xa3\xa1\xb0]\xc0\xbfE\x8f\xee\x94\xc7\xfe\xc4?w\xc9\x89\x1c\xb8\x00\xde\xbf\x0c@\xc7\xb91\x03\xeb?\x8d\x8d\xbc\xbf\xf3\xb8\x95?\xb1\xa6\x13(\x8e\xe2\xe0?q\x80\xda\xa4g\\\xe6?\x91\x94\x17no\x8c\xe8?rq\x8d\x04\x0f\x10\xda\xbf=\\G:\x00\xef\xe4?\x1f\x80\x97w\xf4\xf1\xeb?E\xab\xc1\xd0p\xb5\xca\xbf\thK\xdd)u\xe5?\x81\xcbE\x0e\x8a*\xed?\xc3t\xcc\xfa\x19\x02\xe6?I\x91\x1e?&\xab\xe9?\xa1%EA\x8fu\xe3?\xd3\xff\xb3P\xdf\xc6\xe3?A\x87\x0c\xa3\x83\x0f\xbf?\xf8\xc6a%\x08o\xea?\xfc\xd2\xc5cM:\xe7?\xc0,\xb2\xae\x93\xe6\xe6?\x94}\x19\xed\x13\x93\xbe\xbfC&!c\x87\r\xb1?\x95\xce\xa0\x0b\xfa\xc6\xb1\xbf\xd73\xbf\xa4fI\xea?D\xdd\xdbm\xfd\xbe\xd3\xbfdZ\x99\xa8}\x8e\xe7?\x05\n\x8d\xadK\x84\xe7?\xe9\xf4\xd0\xbf\x18\x12\xb0?\xff\x05sV\xda\xb5\xe9?\xd9 K\xceM\xd2\xc4\xbf9\xbcV\xbb\xbcc\xe9?\xd3G;T\x86\x17\xf1?\x13C<z\xcb%\xe6?\x1d\x9d\xfc<c5\xe8?u\xbd+\xc7\xae\x9f\xc2?\x12+\xc9\x16\xb9\xe4\xcf\xbfC\x8b\x17T\xac&\xc1\xbf\x8eU\xb9\xda\xd2m\xe7?$a\xaa\x1f\xbeE\xeb?>\x04\xe9\x87]\x98\xe2?\xf2\x0e\xd9F\xee)\xcb?\xd9P\xab\x9a!V\xdb?\xbf\'@\x11\xea\x9a\xdd\xbfV\xc2\x1a\xf6b\x10\xcb?0\xbd;\x9f\xd3#\xf2?(\xdeY\xaf/\x8f\xe2?\x8do\x15\xeb\xfaO\xbb\xbf?\xf9*y\x1a.\xe3?\xae\xf3\xca1/_\xe4?\x91\xd4\x9d\x1e]\xeb\xe4?\xf5\x0e\xe7:\xf99\xec?O\xc3\xf7\xdd\x9e\xab\xe2?\x9cF\xdb\xf8\x01p\xec?j\xd7"C\xd2f\xd0?Np\x9c\x93\x04i\xde\xbf\xf0\x9a\xbc^\xc1\xff\xe3?,sY\xa6\xfb\'\xe6?\xec\x04\xda\xcf)\xdc\xf1?c,\x10\x9f\x07\x02\xe8?\x95\xf0^\x12"\xea\xe8?\x00\xa2\xc9\xc0F\xce\xe0?\xa6\x8bXN\x1d\x9d\xe2?l\xe6\xcdY\xcf\xe8\xd8?\x8egXx\xf0\x0e\xc1\xbf\xbd\xfd\xce\x05B\x04\x9c\xbf\xb56$ ~\x08\xeb?H\xb5\x984\xb8M\xc4?O\xbd\x1d\xa9\xa61\xe0?\xd8/\xe8\x0b=1\xe6?\xd5\x942\xfd\xe4\xe4\xe8?]c\xf2<\xbe\xdd\xce?\x18\x1e\x87J\ne\xe5?\xb6H\x9a\xde\xb6\xa3\xe1?P65\xfa-\x02\xcd?\x16\xa2\xaaYk2\xe6?\xd3\xf7$}sL\xe8?\xf6&u\xf7\x8f\x9e\xe5?";J/\xe8T\xb6?z\xf0\x11\xdeSJ\xe1?!>\x9fm\x93O\xe2?dI\xfbP\x8er\xda?\xed4{\xd6}Y\xc0?B\\\x14\xcc\xbb\x1d\xed?\xa4I\xcb\xeef\xa1\xe4?\xd1\x93\xda\xfa\x0cG\xe0?\x0f\xa92\xe2=d\xdb?\xaa\xb3`\xd9\x9d\x9f\xd5?J\xcf\xd7v\x99\xe3\xe7?w\xb59\xe9S\xf2\xd4\xbf\xe1=\xaeP<\xb7\xea?DOw\xb2\x9b"\xc0?{.\xc2\xa5"!\xf0?\x9fA\xf9\x96\xcfJ\xe9?M\x9c\xc4\x9e\x91"\xdf?\xff\x12\x1a*\x00\xb7\xe7?L:\xba\xd9<A\xe1?W7\xf3\x7f\xe7\xc1\xec?\xc0\x9c*\xe1\xba,\xe6?\x02\xea\xa5\x96K]\xe5?\xcb^\x93\r!\xb4\xe4\xbfY\x03K^\x908\xee?=\xca\x16\x80\xe3t\xe9?.n\xf0(3#\xe8?\x19ej+\x8f/\xd2?<\x02}H\xf3\x18\xb0\xbf\xb6\x9f/\xa4\x88\xef\xb7?\x97\xbbT\xb5B\xad\xd2\xbfWc\xe0)\xac\xc0\xe2?\xc9\x97v\x14h\x1d\xc6\xbf\x82w\xe4\xe6u\x05\xd3\xbf\x0b\xcd\x04\x91.\x8a\xba\xbf\x95e-\x0f\xebZ\xa2?\x84\xb6Z,\xd4\x12m?\xee\xcc\x81\xb8\xf8\xaf\xbb?\xf9Z\xf1\xfc\xc4\x1d\xd5\xbfNEbH\xcbs\xc1\xbf&\xb3p\x1eU\xef\xb3?\xb4A\x94\xc7f\xf4\xda\xbf:+\xc2\xdf0`\xd3\xbf\x9a\xd0\xd8Rq}\xa3?\x0fiq\xfe\x12G\xb6\xbf1o3\x85\x1a\x04\xd1\xbfG\x17\x0e\xd9PJ\xb3\xbf\n\xd0D\xa4#\r\xc2\xbf\x8f7\xa2\xdcci\xce\xbfn\\h\xd0\xa7\xf3\xb4?TZ\xdb\xcak\xe3\xd8\xbf\x88\x8a?\x18\x0eD\xa2?\xc0\x18\xdd\x90\xc2\xeb\xdd?e\xcc!\xcd\xc8\x1c\xca\xbf\xd2\xa6N\xd9uX\xdd?E\xf6`\x009]\xc0\xbf\xc9\x95\xc8\x89LN\x9b\xbf\xd9\xb0\x8d*\xb3b\xbd\xbf\xc8^\xd1 \x1e<\xb0?K\xab\xfdU!~\x9f\xbf\xce\x8cZ\x94\xafp\xbe\xbf}$jq\xdc\x8e\xe0?\xfcc\x1b\x00\xe6\xfe\xa7\xbf\x881Ms\xdc\xa3\xb7\xbfV\x15k\xff\x0b\xb5\xbd?\x1f\xfa)\x1b\xa3\xec\xcd\xbfL\xc7Z\xa8\xea\x1a\xd6\xbfh\xbe\x1d\x04\x19\x88\xc7?^\xee,\xd9\xd0\xb2\xdf?eA\x1b\x80\xa5\xf0\xc0\xbf\xda\xf3\x86\x01<;\xc2\xbf\x8dd\xc9\xa8\r\xcb\xb7\xbf\xf2\x86\xbf4\x17\xec\xd2\xbf\xbe\xc8\xeb\xca\x14\xd6\xdd?\x8f\x91]l\xf2l\xe0?\xeb\x94\x93v\xe18\x89?\xcb\xfd\xdc\xe7j6\xde\xbfD\x91\xb2my0\xc2\xbf\xe5vh\n[\xab\xcb\xbf\x01\x0e\x80\xa7AU\xc5? \x03\x18\x80\x80\xda\xa0\xbf\x17\x9b\x94$\x82F\xd0\xbf\xfa\xc6\xb2\xb4^\x1b\xc1\xbf\xdcaH\x1a\xfe+\xd0\xbf\x15\x1b\x1c\xb4V:\xc5\xbf\x84l\x92\xeb+\x00\xaf\xbf\x0e>\x1c-0\xd3\xcd?\xa1\xbbL\xa4\x9ag\xdc\xbf\xcf\xba\xfbE\xdc\x15\xd3\xbf\x10g\xd9\xc1\x9ap\xb9\xbf\x17\xcf\xf4\xff\x87\x18\xb0\xbfxe\xca\x94Z\xd7\xe1\xbf\x94v\xe6\xa1\xc7A\xda\xbf5K\xdcB\x9b\xe9\xd6\xbf\x86\xeb\x86\x06MY\xf5?\x0c},\xe9\x10W\xc4\xbf\x02\xab\xc6\x8fv/\xe8\xbf\xb9\x11\xfc\x8dBz\x98?\xd2\xe3\xce\xe9\xc1\x9d\xf2?c\xdf\x14\xb3\xa11\xda\xbf\xcb\x97\x8ajC\xa5\xe8\xbf\xfe\x99\xd4\xd3\x15\xfe\xdb\xbf\x95\xb8\xd0xU\x99\xe5\xbf\xf1\x85\n_\x96\x1b\xe5\xbf\xf5r\xd4\x89\xf07\xe5\xbf\x11\xb1\xc0\x8b\xfe\x0e\xda\xbf\xa7Bc\x87q\x13\xf5?\x8c\xd7\xbe8%\xbe\xdb\xbf\xca\x8c\x08&\xf2\xda\xe1\xbf\xf8>\xc0b\xcb\xf2\xe5\xbf\x17\x8e\\\xfaau\xde\xbf\xab\xe5\xbe\xc1\x92/\xe2\xbf\x034L!d\xe6\xe0\xbft\x10B\xa113\xd3\xbf\xd3\x1aS\x9a\xd6\x88\xcc\xbfY\xb2\xcf\xb6D\xb8\xe6?v_\xf3\xf51\x1e\xb8\xbf@\xf7\x13\x054\x9a\xdf\xbfhK\x82\xcc\x1b=|\xbf\xca\xb9p\x8c\x9f\xf7\x89\xbf\xf6)Q\x16d\xb7\xdb\xbf\n\xe9\x0c\x8a\x91G\xe1\xbf\xc4\x1a\xfc:\xe0 \xd2\xbf\x07J5\xcdM\x9b\xd6\xbfL^S_\r\xe0\xda\xbf\xab\xbfB*\x86\xa1\xd3\xbf2jE4+\x02\xe0\xbfd\xb0\xd7\xb8\xeaB\xda\xbf\xa66R\x1c\xec\xb6\xe4\xbf\xe9\x903\xdd\xa3!\xd8\xbf\nyn\x08\x9f\x9f\xe4\xbf\xc1\x04\xb4\n\xd2]\xe0\xbf\xc6V\xd3\xb2\xa6\xa4\xdc\xbf\xc5)\xab\\\xd08\xd9\xbf\x8d-\xf3\xf9\xb0\xe1\xe0\xbf\x0c\xf7I\xa9B=\xd9\xbf\x9b\x14i>\xe4q\xdb\xbf\x11`\xb2\xb5]S\xd9\xbfL\xb5fav.\xd4\xbf\xe3\x9c\x80\xbd\xbd\x00\xde\xbf4V\xf8J\x1b\xaf\xe1?D=\xed\xc6\xf4\n\xe0\xbfm\xf0\xd4\x9e\x07M\xd8\xbf\x8d\xd1\xadY\xb6\xf2\xe7\xbf?C@\x17c|\xe4\xbf0\x04\x9f\x19\x8c\x11\xc3\xbf\xe7\x13\xa3\xd9HC\xdf\xbf\x16\xb8\xb0\xc1\xff\x12\xe2\xbf-\xf0\xe5\xd2d\xd5\xdf\xbf\xcb+\x08\xda\xc8\xf0\xdb\xbf\x9cSa\xf76\x93\xd4\xbf\xe1\xff\xd2\x18\x19\xb4\xf0?\x0e\x1e\xd9\x89\xef|\xe2\xbf\xd3\x1d\xeb\xed\xd0|\xde\xbf\x00|L9n \xe2\xbf\xdc\x86\x80\xaf\xaa\x14\xc4\xbf\xd2W?\x9bgh\xe0\xbf\xc4=\x84\xe8\xc7\xcd\xe0\xbf \x879\x11\x88\xb1\xee?C\xd0\x97J\x96*\xc5\xbf\t\xd8\x17\xd5t\xee\xd5\xbf\x85-\xcb\x9a\x10\xdf\xc2?\xf5\xec\xc7SH\xcf\xe2?\r]\xce-\xc8\x7f\xc9\xbf~3\x8b\xd0\x9e\xf7\xe7\xbf*)\n\xce\x07h\xb1\xbf\xbf\x1e\x93\x83y`\xd5\xbf\xe1\x8b\xb6\xcf~n\xe1\xbf\xbe\x9b\x08\xe6\x88\xa0\xd2\xbf\xef#$Y\xf99\xd1\xbf\x91\x12\xc6\x13Z\xe5\xec?\x1f?\x8dD\xe0\xe1\xcd\xbf2\xa5\xf8J?\xfa\xc3\xbf\x0b\x8c\xa9\x98E\xf2\xd9\xbf\x9ec\x14\xb6\xa23\xc1\xbf\xc9\xf4C\xb4\x9d\x9a\xcf\xbfU|\x9c\x89\x92\xd5\xdb\xbfY\xb2\xb14L3\xcb\xbfof6\xa5-\xd5\xb1?t\xc1\xe6,\xf7\xdf\xc2?r\x05/\xeb\xa1/\xcf?\xd6\xea\xe6!W\x8f\xc7\xbf\xd1HG\xd3\'g\xd5\xbf;=\x83\x08\x92M\xc6?5*\xa6\xd4\xd6`\xc0\xbf\xfd,\xaa\x85\x85l\xc3\xbf\xac\xa6\x9b\xa1\xad\xa8\xc7?x(\x07\xa1\x0b\xa7\xb3\xbfU\xc49\xcak4\xcc\xbf\x86\xb99\xefD\xb5\x9e\xbf}}\x9d)\xde\xd7\xc2\xbf\xaa\xb6p\x8d\x96\xf9\xc8\xbf.\xcf\x84\x9d\x9b\xb9\xc6\xbf7PT\xa61\xab\xdd\xbf\x9dl,\xa2p\r\xe2\xbf\xe2R\x89\xe5\n\xfb\xc5\xbf\x80#\xddD\x8b\x14\xc1\xbf\xd5O\xd0\x86\xe9O\xe1\xbf\xbf\xc3%\x9e\xa2\xc9\xbe\xbf\x0e\xbb\xe8\x08\ru\xc0\xbf\x81-\x1es\x1a\xc3\xa6\xbf\x1a\xe0\x92\xc7\xf33\xb8\xbf\x11\x1d\x05\x00T\xdb\xb1\xbf*\xda[ZNj\xcf\xbf2\x96\xef_t\xe3\xe5?w\xc1\xb8\x8e\xed\xd8\xc6\xbf\xf4\xb7\xed\xe7\xb0@\xdf\xbf\xc4\x1eB\x05\xab\xa9\xe7\xbfo\x96\x06)\xb6\xeb\xd0\xbf\xdb\xbb\xbaB\xf8M\xc0\xbfO\xc3\x86\x1fh\xed\xc3\xbf\xc8pN7<\xfe\xda\xbf*{_\x0b>o\xcc\xbf^\xa0\x00\x0c\xcc\x1a\xc9\xbf}6\x07\x91\x00\x9c\x85\xbf\x93\xe5N\xb4\x9c\xc0\xed?3)\x11\xe4@}\xcd\xbf,R@h\rI\xbb\xbfk\x80\x0cg\x93\xf3\xcf\xbfS\xbc\xdc6\xc8\x07\xd3\xbf\xafx\x1b\xf9,\xcf\xd2?_;,\xb6\x99s\xd4\xbf\xde\xd4\x15\xc1\xfc\xc0\xf3?\x12;\xc0\xf1\x83\xe6\xd1\xbf\xc2\x80@\tfr\xc2\xbf3\xbe\xd4\xff\xce9\xdf?\xed\xfb\xc2|\xfbV\xeb?r\xbb&\x9di\xf0\xcb\xbf\xdc\xbd\xbf8Y\xf5\xbf\xbf@\xee`m\x93\xd0\xcd\xbfkhh\xc0F[\xd4\xbf\xb1\xbc7j-\x03\xbf?T\xf2d\xa6*\x8e\xb2\xbft\x91\xb6\x14\xe6\x1f\xcf?\x1b\xba\rGvJ\xf4?T\xa4\x8fB{$\xcb\xbf\xda*\xd1\x1d\x16\t\x8d\xbf^\x15TP\xdbZ\xdf\xbf\x91\xa7Ha\x90\xc2\xb9\xbf\x87l\xaf\x01q.\xca\xbfT\x90\xfb\xaaC\xfa\xd0?\xd8\x8b\xef\x96"\x1e\xc2\xbf\x0ck);~\xa0\x81\xbf\xf8)\xb0Ho\x01\xe7?\x8f^a\xe9\x00o\xd0\xbf\x13S\xc5T\xf2\x08\x96?N\xcf\xc2@\x9a\x0f\xbd\xbf\xbd\x02W\xd9B2\xde?g}pq\xc1a\xb3\xbf\xfe\xdc\xb9\xdc\\\xc3\xb5\xbf\x1d9\xca\xe6\x0f\xe7\xc7\xbf%L\xc4\x08d\xeb\xcb?\xcc#\x1d\x85\x89\x88\xd7?\xae\xca\x15G\x7f\x1a\xd5\xbfZ\xcd]a\'\x04\xb9\xbfA|\xeaX\xbf*\xb4??C\xcdD\x91\xf7\xc0\xbf\r\xffT\x15\xb7\xec\xd3?\xbaX-Y\x8f\x96\x82\xbf\xc3\xe8G\xcb\x85S\x88\xbfr\xf6E=\xae\xf7\xce\xbfg\x1c\x8fo\xd5\xe7\xcf?J\x1d\xdf\xc6)\xfb\xc1\xbf\xb96\x8f\x00 i\xc0?~\xf4-\xf1O\x81\xc5\xbfQW\xf4\xaa\x98\xae\xd5\xbf\x13\x9a]X\xdb\xed\xd7\xbf\xdbEDmv6\xaf\xbfy\xd6\xf4\x17/\xb2\xe5?!\xd0\x87\x8d\xb7T\xce\xbf.\xf1\xb4\x8e$\\\xd2?2\xd8\x7f\xd2d\x06\xe3\xbf\xb0Y\xc7K\x8at\xc5\xbf\xd3a\xb7D\xc7E\x98\xbf\xb2nIA\x96K\x9f?\x98\x05\xa7rW\xa7\xc9?s\xeaH\xc3W\xc5\xcc\xbf\x8dS\xc0&\xff{\xad?\xe6\x8dz\x12w\xa8\xd1\xbf\xed\xefT!\xbb=\xf2?\xde\xf9\xf8fL\xd0\xda\xbf\x95so\x9b\x84\x17\xb7\xbf&\'\xba]l\xab\xca\xbfP\x10\xea\x02PP\xc1\xbf(\xed\x1a\x8ek\xa1\xb5\xbf\x9f\x83\xb5(\xb5*\xb1?<|fdF\x9d\xd5\xbf\xdas\xac\x8d\xc9\x90\xe0?U\xc9:\xb7V\x7f\xd6\xbf&\x8d\x16\x9c\xe6\xdb\xe0\xbf\x8c1\xdd\x8e\xea"\xd6\xbf=\x8d\xb6\xa6$\n\xde\xbfa\x82\xba|\xfa1\x97?/\xb3l:\xe3\xd9\xd2\xbf\x12\xacA\xa8UG\xa6?\x0f\xc5\xe57}\xcc\xca\xbf\xa0\xec\x90\x1bCA\xd3\xbf\xf6Y\x17\xc0<\xbc\xbc\xbf3\xe6=B\xb2\xf6\xd5\xbf)\xe4\xa4p\xba\x95\xde\xbf\xd3W\r\xdc\x87\xd3\xd9\xbf5lq\xc4\xc2\x00\xc2?\x05\x90t\x98k\x12\xe4\xbfQ\xba?\xbc\x01\xc3\xe0\xbf"$\x8a(Hh\xd8\xbf)\xbf\xe2&\x9b/\xde\xbf\xc4\xdd\xac\xc9\\\x14\xa3?E\xda\xacu\xac\n\xc6\xbf\xd3\xc3\xef\xe8\xfe\xa4\xe2?\xedH|\xab\xbaw\xdc\xbf\x11\xf9\xf0C\xd8\\\xd0?m\xd8\xcf\xfb\xdb0\xdc\xbf\xab-\xe0\xd5\xad\xd6\xe3\xbf\xd41;fPD\xe4\xbf\x14\xbf<u4\x9f\xdb?\x1f\xa4\xb1u\x83\x98\xe0\xbf\xe2\xc1\x00\xfcq\xd1\xdf\xbf\xdbs\x98\x12\x8e\x8a\xe3?V\x82\x12\x11\xf0\xf9\xe4\xbf\r\xf9\x82\xa83\xed\xe2\xbf/V\x98j\xb1d\xb0\xbf\xbb^\xd5\xcf?]\xc2\xbf\xc7\xeb\xb8K\xa0\xa7\xa1\xbfE\xf82H\x89F\xd1\xbf\xa26\xf9l!\xf8\xd1?Y\xdf\x13\xcfO\xe4\xc0\xbf`cY\xd7\x9dw\xda\xbf]\xba\x86\x8b\xaa=\xe3\xbf\x94!\xa5\x8dl\xeb\xc0?\xe0\xdd\xee\x95\x05\xb1\xd8?\x18\xf9\x15\x8b\xe1{\xd6?\xabv\xd0\x00\xf27\xe2\xbf\x18\xa8V\xbf01\xc6\xbfOr\xf2\xd8\xfc\x81\xdf\xbf\x1c\xe0:\xc8\xb6\x07\xbd\xbf@ X\x9b7\x08\xd1?\xd3k]\x14\xee+\xd1\xbf\x92\xb1$\xa7\x83\x02\xd3?g$`O\xab\xf5\xe3\xbf\xe3\xff\xa5\x81\xeb\xe5\xda\xbfb%Yl\x99\x8f\xe0\xbf\xf6\xa4\xa7\xba<l\xe2\xbf\x821\xb3\x90~\xe9F\xbfz.\x98\xbez.\xd1\xbf}+\x8b\xd0$\x81\xb5?$\xec\xbae\xad@\xe3\xbf]\x85b\xf9|\xcb\xde\xbf\xf7Hr\xffF\xa6\xf0?\xae\xfem*\xf7\'\xb4?%*\xd5\xa4\x0b8\x98\xbf\x1a[HU\x1e\x92\xcd?\x85\xa6X\xca"J\xc1?\xd7\xcd\x88\xae\xf2\t\xe4?\xe60\x9c\xfb\xcb\xb2\xeb?\x85x=D[\t\xda?nGVX\xd8\xde\xf2?\xf5\x8f\x07\xc1\x90\x89\xc5?\xa1\x07M/u\x8e\xf2?\xdf\xab\xd4HC\x88\xd8\xbf\x1e\xbe\x15\xcc!\xda\xc4?b\xf7f;%-\xe5?UT\x10\xbf\xbfq\xcd\xbf\x16\xc8\xd0\x84\xb2\xce\xc9?\x1e\x92$S\x1b\x02\xf3?\x1b\x03\xb8B\xa4\x08\xee?1f\x8b*\xb1\xb4\xde\xbf\x16\x85\x92*\xe9\x19\xf2?5\x1c\x1bz\xce\xd3\xf4?\xf4\xb98\xacj\xb4\xd8?\x10\xa6\xa8\xb7\xe7<\xf4?+\x01\x0e\x04\xc5K\xdb\xbf{5\x9e[Y\xb2\xcd?\xe6D,\xe1\x1dX\xbe\xbfc?\xe8\xd9\xe8z\xef?z5\xc0\x8c\xf5#\xce?\xdfi\xbe\x9e\x1f\xa0\xe1?\xa8Q\xc4\x1a\xe49\xf0?\x04\xf4r#\x0f\xf9\xf2?Lu\xa4\xb8\x96\x8f\xde\xbf\xf1\xbaM&\xd1\x87\xe9?\x8c;\xe6\x0b\xc7-\xe4?\x18\xcf\x91\xb6\x8b,R?Xq\xbc\x12\x0f\xc7\xf1?\xd4T1\xee\xe3F\xf1?\xb1\xa4\x9c+=X\xe8?\xfd\xf2A\x06\'\x16\xc2\xbf\xfe\xbf\x9cyj\xd2\xd6\xbf\xd2c\x1f\xab}\xf7\xeb?\x97\xda\xe4\x02\xaa#\xd4?nwS\x18Me\x88\xbf\xc0EQ\x9f\xc2\x80\xf0?\xb5\xb5\xfb\xfe<\x7f\xea?\x17\xe0}8\xc0\xd9\xdf\xbfP\x1c\xe3\x17\xf5\xa8\xd8?\x87\x9cn^[\xdc\xde?\xcd\xe2/t\x1c\xce\xef?|J\x1c\x1bp\xa5\xd1\xbf\x85\xf0O=\x85\x9a\xf4?\x1f"\xb7\xfaa\xc6\xca\xbf\xde\xfa[|\xbe\x0c\xbd\xbf\x86\x0f\x1d\x9c\xb1\x16\xf1?\xa7(\x96\x7f\xd5\x8f\xe7\xbf\x9c\x0cTO \x10\xf2?/I\xa8\x93V6\xe7?\x8c\'\x063\x01F\xf6?$\xf5\x11\xc8\xc4m\xed?\xa2i\x7f6\xc8|\xef?\xe3\xd6\xd1e#[\xa0\xbfcp\xe7I\xfe\x88\xda\xbf}\xaf8m\xf6|\xf2?\xd8\x15\x1b12\x88\xf3?:\xd1\xad\xce\x90"\xc4?\\\xe6\x15\xdc\xab\xcb\x96?,Hg\xb8\xc8T\x85?\xb9\xf0h\xee\xd8\xfa\xbc\xbf\x9e-\xd4-\x80\x99\xbd\xbf\xf4\xd2\xca\xe8\xb58\xdb?A\xb9\x84W\x1d\xcd\xce?\xaaQ!\n\xe8\x9a\xc6\xbf\x04Ks\x9f\xb5\x08\xb5?\xf4Q\xd7PBU\xb3?\x1a\x96\xa6\xf6l\x9d\xcd?\x18\xd6\xd5\x8a\xd8i\xda?W\xadC\xa1\xff\x86\xc8?xs\\\xe3\x15\x99\xd4?\x17\xd6i7\x13\xfa\xd3?\x1d\xcd\xef\xb4\x13\x15\xbf\xbfp\xc83I\xfb\x00\xb9?\xe2w3>fp\xda?\x87\xee\xf7\xe2\x01;\xd4?\x06\x9b\xdb\xe0\x85\xaa\xc6?r?0\xb9\xe4)\xd6?\nyr|o>\xc8?:\x04\xb1\xa5,`\x9c?)Q\x05\x97\xf2\xc0\xd9?\xcb\x94?\x8e\xf2\x9c\xce\xbfjb\xd2\xe0\xf6\xe5a?\xad\xe8&\x1d|\x0e\xd7?y(\x16a\x0b\xb1\xc3\xbf\xe2\xc4Z\x98l4\xd0?J\x1bwh\xda\xb9\xc7?u\x9cW\xb8A\x80\xcf?YNV\xdd\xa6\x9f\xd1?r:\xc9\x82\x80P\xd1?9Q\x15/lx\xc9?{\xf0c\rD\xf9\xa6?4~<\xb8\x14\xce\xc8?\xc8\xc9\xedy\xa3\x9b\xcf?\xeb:q\x04\xe1\x10\xd7?\xfa\xa0\'\xe7\xf7\x1d\x8e?~\xfa/\x14\x1f\xcd\xcc?\x93\xa2\xe6\xafP&\xd0?\x89>\x1d\xd4M\xa3\xac?j\xe3I\xdb\xcf\x8e\x9d\xbfJ6\x87\x0c\xec\xda\xda?,\xc0^:\x9bp\xd0?\xd5\xe9\xc5\x7fF\x08\xdb?_\xad}\xef\xcbk\xb3?\x1a\x19\xfa\xdc\n\xf7\x9f?\xd9\x18\xe0\xf2\x0e\xa6\xc6?\x9cH:j\xd9\xb1\xd0?&\xdd@\xfa\x0fm\xd5?\x0f\x06\xd2\xea\xddt\x83?B9\xfa\xe3\xcd%\xa7?\xa4\xfdU\xb1\xf1F\xd5?y\x83\xfa\x1d\xe7\x90\xc6?\xd4\xd8\x9b\x89\xf7\xd8\xd0?p\x96\xf2\x1b\x18\xee\xcb?\xab\xb2n\x9cb\xea\xd2?\x12g\xc3UP\xe6\xd0?\xaa\xbd\x9c:\x9a\xf3\xcf?@\xa7\x06?\xec^\xab?a4}\x01\x9a\xcf\xdb?\x90\x91\x88Q\xca\x11\xd0?m\xda\xc0\xdfY\xfb\xd3?\xf6D|p7\xae\xe8?\x06w:P6\x94\xd5\xbf\xc2,\xa2:\x07\x80\x94?\xfb(\x1d\xa3W>\xb2?\xd7sn\xc3.n\xcb\xbf\xf9~\xcah\xc7\x1b\xe0?)\xff\x7f:\x8dv\xe0?\x1fhDa\xe7h\xc3?t<0SL\xa3\xef?\xf4\x1bar\x0f9\xc9\xbf}{>d(\xee\xed?\x86\xf3\xfe\xbc\xcb\xed\xc9\xbf\x86\xd6\x94Jv\xfa\xc6\xbf"\xf7\xa8\xec\x01\x13\xd7?\x87mh\xf3\xc1Q\xd5\xbfRJl4\xbe{\x91?x\x12eg\xb6\x0c\xf0?\x88\x8e\\W2\xbf\xe7?\xb8\x8a\xaa\x0e\x0f?\xcc\xbf\x80\xc2\xc0\xc7\x1a\x94\xf0?b\xbdl%\xb9\x85\xf2?\xc84>\xe1u\xe5\x90?aS\x16KX\xfb\xee?\x081\xaep\x85,\xce\xbf} \xbal\x88\xf9\xbd\xbf\x83\x11/\x14\xc3\x04\xd1\xbf\xbb{,\xac5\xfb\xe6?\xdb\x86\xe6Ru\x96\xc2\xbf\xf3\xe5\x1b\xa7#\xca\xd0?q\xd6fC.%\xec?l\xdc\x849\x06\x9d\xf1?K\x08:\xf1\xcbX\xd8\xbfo\xb0\xda\x01\xc5\xe9\xe0?NL\xf3\xa68\xef\xd1?6\xbfdD\x00\xa8\xd0\xbf\x9a3pS\xc1\x0f\xf0?:\xeb\x03\xc3`\x03\xea?\xb4\x07\x9a\x8cb6\xdd?Q\xac\x06\x12-\xc1\xd9\xbf\x10\xc3Q\x16\xac\xa2\xdb\xbfO\xcb\xd7i\xffk\xe1?\xdaL\xf4~\xdb\x1b\x9d\xbf>\x0c!J\xc0\x83\xd4\xbfG\xdf\xb4(e\xcc\xeb?W\xce\xab#\xd0a\xe4?\x8b\',\x19=\xd0\xd1\xbfv\x92e\xf1\xef\xda\x96?\xeb\xcf\xded\xc7\xcc\xc6?MMb-N\x0f\xea?\x17}\xcb\x16F;\xc2\xbf\'<9\'\xb0K\xf2?\xa1"\x99\\\xa1\xfe\xdb\xbf\x16\xd8\xbax./\xbf\xbfh\x12\x00\x8e\xadg\xe7?\x1b4*7-\xb7\xe4\xbf\x1b\xb8=\n\x93\xb0\xee?\r\xae\xc5\x04\xdaS\xd7?@\xe8\x18\xd7f\xb2\xf3?\xc4=2\rv\xb0\xe5?\x02\x13\xb2\xab@%\xe8?\x06\x7fB\xf1\xe6\\\xaf\xbf\xdf@\x85\xd0\x8f\xd0\xbf\xbf\xa6\x93\xa3\xc9\xdd\xb2\xf0?\ne\x00P\x08o\xf0?}=Yc\x90\x00\xcc?%\x8e\x0f\xeeb\xe9\xb4?S\x06b\xeav\xd8\xb8\xbf:\x10_\xb0\xdf\x0e\xec?\x18W\xf7\xbc\xfd\xd1\xc7\xbf^|\xc3\xcf\x98\xc4\xd5?\xb7=\x11\xab\xc8\xaf\xe5?\x0f\xacQ(\xd8t\xe4?\xfa\x84\xa6F\xcb\xd7\xbb?\x04\xfb\x9e\xc5@K\x81\xbf\x1f\xc8\'\xf1\xd1\x9f\xd5?\x14\x93\xbe\\\xf6Sr\xbfL!\xa7\xae\x86\xc2\xcf?Q\xa1\x07\x18\xce\x8d\xda?\x13L\x98\xbe\xebp\xbf?\xa5$W\t\x02\xb4\xeb?\x12q%\x16\xbdO\xbb?\x9e\x0c(\xb6\x1c\x8d\xd8?\xe9\xca~+\x07\xc9\xa2\xbf+\xc8\x0b\x1fJ\x9c\xe0?z\xa0n\xc7\x01E\xc1?\xf3s\x8a4\xe4\x8b\xd8?\xd6\xd7cW$\xc6\xbd?\xc4)\x89d\x19\xbc\xaf?.\xec\xf9\x82m\xfd\xd6?8\x0e\xc6\x7f\xef \xc5\xbf2\xf54[\x1b#\xdf?\xc6j\xe8\xab!\xdb\xc3\xbf\xb8\x84b\xd5\x90`\xe8?\xb1/\xc5\x1d\x86\xad\xe1?g\x92\xf3\xfcjH\xd8?\xae\x93n\x1f7!\xb8\xbf\x8a$\nE\x8b\x8b\xe7?\x95\x9a\xcf\x1d-&\xe4?{=\xd3\xd4\x8d7\xca\xbfCE\xd1\x8bN\xc4\xde?\xea\x8a\xbc\x05\x8d=\xdf?)`\xd6N\xd7\xb5\xca?\xcb@\x94\x15w.\xa5?g5\xc8\xbe\xf45\xa3\xbf\x85M6\xe0\x90\xa5\xe0?eQ/\x7fqz\xbe?\x96U\xd6\x91\xd15\x97?\xa4\xa0\xb3\x935\x8c\xd3?D\x134\xda\xd4\x80\xe6?\xa1\xa6ng]\nY?\xb9\xa6\xfa\xb4\xc6\xd6\x94\xbf\xff5\xf3n\x03Q\xa7\xbf\xae\xf4\x9aR4{\xdc?4\x8f\xd7\x85x\x8a\xe0?\xa3\xcc\x90\xf6#)\xc9?\x15\xbbZ\xce\xd7R\x8a?\xa0\x15\xca\x85P\xca\xc7\xbf\x0b\x89\xac\x81h\xd5\xd3?\x7f1\xb9\x1d\x03\xbb\xc6\xbf\xa4\xa1\n4r\x9f\xe0?\x8d\x16\xaa\xf9\xb3\xaf\xd2?\xbcV\xe26\x8fn\xc4?\xb0\xcc\xc4\xb31\x92\xe4?\t\xb8n\xb1\xfb=\xb3?\x9e\xac\x9f\x05\x1c\x87\xe9? \xc3\\3D\x8f\x8d\xbf\x9b{\xa9>g.\xdd?J0\xbaZ\xbd\x8c\xce?h}]\xae/\xcf\xe8\xbfTJu\xf3\x9f-\xc9?\x9d\xe4\xc1\xcdj\n\xbd?KA\x86W\x9a\xa1\xe1\xbf\x87\xa6\x7f\xc5\xb6\x9bp\xbf_\xcdhp\xeb\xe7\xe9\xbfw^\xd4jB\xaa\xe9\xbf9\xa9b\x00/d\xda\xbf\xc0k\x83\xcf\x9ar\xe2\xbf\xa2\xe2\xf39\x12\xf0\xc3?\x9a\xb3CV\xba:\xeb\xbf\x95F\xb7\x0f\xb0\xfc\xd4\xbf\xd5\xbe>\xa3V\x85\xc8\xbf2\xc6)?ux\xea\xbf\xe1\xf4\xe2\x99{\x13\xb1\xbfl\xc4\xcc\x96\xe4\xca\xde\xbf#\xd7N\xc2|q\xe2\xbf\x95(i7\xfa\x19\xe9\xbf\xe2\xb9\xa8\xa2l^\xd1\xbf\xc9\xe0HQ\xe7\x03\xed\xbf\xfd-GR?{\xe6\xbf8\x81\xc1\xdb\x0c\x1b\xcf\xbf+\xefm\x13\x0b7\xe1\xbf\xea\x94\xa1!\xfa\x89\xd6\xbf\x91\xef\xa5\x02\x84\xf9\x95?\x9e!\xe9\x9d)\xb7\xc7\xbf]\xde\xbb\xae\x8c\xab\xe7\xbf\x0b\xa5P\xc7\x94\x8c\xc4?\x1dgk~@T\xef\xbf\xd1P\xf0X\xc5\xfd\xec\xbf\xef\x03\x960\xed\x15\xeb\xbf!=4/eH\xd5\xbfk\x9f\xcc\xe2)\xd8\xed\xbf\xe1\xaf\x8e^t\xc5\xe3\xbf\xdf|\xa7\x05\x8f3\xc6\xbfr.\xe76\'\x7f\xec\xbf\xb7\xc78\x13b\xaf\xe9\xbf\x94\x8az5/\x99\xe6\xbf#l\xd0\x94W\xbf\xd4?&\x80O2\x98!\xc2?\x9bq\xa43\xc5\x19\xeb\xbf\xc1[j\x9a\xa6\xc2\xdd\xbf\x15\x04\x8c\xb5\x02\xb2\xd4?n\x12\x8aQ]b\xec\xbf\x82i{\x91\x06u\xee\xbf1z\xd4\x9cJ~\xd6\xbf\x1e|\x8e\xa4O\x92\xd8\xbfx\x85/^V\x9f\xd8\xbf\xecR$m\xdc\x1c\xe9\xbf@\xdb\xc6\xb1h[\xdf\xbf\x85N=\xca\xf5U\xe7\xbf=\xf3\x99\x0e\xec\'\xd6?d}\x1ce\rs\xa5?#]\x93~\xeaF\xe6\xbf>\xa3\x08\x97\xcf~\x88?8${\xedK_\xeb\xbf\xdbm(\x86\xa8\xd6\xd0\xbf\x1e\xdc\x0c\xeb\x83\xd9\xe7\xbf\xc6"\xa3o\xd19\xee\xbf6\x86\xc3\xc1\xa5\xda\xe8\xbf\xa8\x9a\x14e\xa8R\xe0\xbf\n\xad\x16\xfc13\xda\xbf\xa48#b\x0b\xf2\xeb\xbf\xb8\x08\xf9\x10{\x07\xe6\xbf\xfd_;\x16\x01\xee\xda?\x03\x1a\xf7\x8e5l\xe6?\xad\xc1\xf5\xce\x90\xd6\xd3?\xf7\xdfV\xc4\xb3\xee\xb7?\x19\xdf/Z\xa1\xc7\x9d?\x11\xbb\x87\xcf\x8bY\xe5?\xd3\xb4\x8cEhr\xe5?\xbb\x0cr\xd1R\xbf\xd3?\xafK\x98\xe9Y \xe6?9\x95B\xbc\xd2\xe0\xe6?\x00\xe3\x01}\x16<\xde?\xd1\x07\xc2:6\xe4\xbd\xbf\xaa\xd9\x02Lt;\xe8?\x8d\xb1\xfe\x85\xc6\xc1\xe9?\xc1\x10\xf4AIY\xb1?\xfc\xa5g\x85\xfbP\xc4?\x93 /\x19\xf4\x16\xe6?*\xb9\xe0\xb5\xde[\xe9?\n\xe9\x85\x9e&\xeb\xb3\xbf.\xad\xf0?\x15\x1c\xe4?\x85,\x8f\xe3\x15\x8a\xe3?fo\x04 \xe7D\xe9?:\x0c\x94\x9f\x83\xc0\xe7?\x1f\xd9\xd6&\x86,\xda\xbf\xdb\x03\xf9\xc2\xc5\x14\xe0?\x84B\xd2\xb7\xc9\xef\xd8\xbf*\x03\x03A\x1aQ\xe7?ye\xf1^\xba\x14\xd4?we\xae+\xc7\xb6\xe5?\xa53y\xaa\xab1\xe6?\x1barh\xe5\xe0\xe6?G/\xc0\n\xc4\xc4\xe1\xbfs\xcc\x06Z9\xe7\xe8?Y\x84\xb9\x18\xa4\x8b\xec?B\xb2\rO\xe2\x9e\xc1\xbf\xabu~\xc2\xe4\xb4\xe4?8l\xb5\xb3I\x14\xea?Un\xba)h\x13\xe4?\xdf\tv\x0bn\x1c\xe1?\\\x85\xa2"Qf\xd2?l\xb6\x0f3\x96\x89\xe5?\x03\x1bk\xc0Q<\xd0? \x97\x02[\xfc\xf8\xe4?c\x13\xea\x07p6\xe2?F\xee9b\x96\x98\xe9?]\x04i\xc8\xb2\x12\xda\xbf\tQ2\x10\x19!\xab?\x9b<,\xba\x9e9\x9f?y\xb8<\x04\x9fn\xea?\xfe\'\xea5\x96Y\xd8\xbf\x86\xa6-\x95\xd2\xd9\xe1?`T\xc2<\x17\x13\xe1?%\xb8\xda\xdcu\xf7\xd5?D\xd7\xab\xdeP*\xe3?\xb0\xf6=\x0fmL\xd2\xbf\x0egI\xbf\xafa\xe7?0SB\x1f\xbc\xc8\xe9?\xce0\xb2#@"\xe0?\x9fIw\x01N\xc2\xe9?\xdf\x96\xc1>\xa1\xba\xc7?\x17\x9bb\x99\x01\x0e\xc0\xbf\xb1\xbc\\oh\xed\xd0\xbf<\xcb3"\xe9\xf2\xe5?\x89\xdf\x19\xb7\xc4\xdb\xe4?\xae\xa5\x1eZ\xbf\n\xd1\xbf?e\x06\xf8]\xef\xf8?\xcac0\xef\x13\\\xe1?\xb3\xd4l\xf6Tw\xdc\xbf\xcaI\xa8\xf3\xe9(\xd3\xbf3\xf2\xfc\x13\xf7\x1d\xe0?7!\xd5\x9e\x11\xa3\xd2?\x00\r\xf8\x03\xb1\x88\xdb\xbf]\x0f\xdb\x17^\x8d\xb0\xbf`E~\x0c\xda\x1c\xf6?\x15@\xe0<NS\xd6\xbf;?R\x81aK\xe3?0$i\x1e\x19\xc7\xf7?U\xc4\x19\xa6\xdc\xd8\xda??i\xbcG\x8d\xae\xf0?\xb0\xf0\xb2\xdd9\x19\xd3\xbf\xff\x99;\x13n\xdb\x8d?_\xbb\xa7\x1c\x86\x8dy\xbf\xfa\x13\xe6\x88\x8c\xdb\xdc?\x0b\xdc\x0f\xf7\xa3\xb6\xd0?(\x07\xeaj:\xda\xa1\xbf:\r\xb5\xf8\x84\xc9\xf5?\x13\xcbz\x9f\xd3\x95\xba\xbf\xdf\xd08\x8dt\x0f\xbb?\x10\xc5c1\xf8\xb9\xd8?1\x14\xc18\x9f\x9b\xe6\xbf\x8a\x07\xc3\xc7X\xbd\xad?\x1eW\xd7\xe0]\xef\xc0?<A\xd1\xb38;\xd5?\xcd\x85\xff\xa9\xac\xac\xc5?\xf9\xa9\x8e\xdcD\x94\xc0?ZT\x19^\x17F\xd6\xbf\x94\xa0\x89U\x10\x93\xcf?\x05\xcf6\xed\xd5\xe1\xed?\xfes`\xb5\xde\xfb\xdf\xbf\x9f\xc4%\xfbV\xa9\xd0?+2\x8e\xf1\xf71\xc2?\xf5 K($#\x8e?\xb4\xcc\x89\x7fHl\xf9?\x16\xd7z\xf52G\xf7?\x00\xc5\x8c\xff\xb4\xbb\xaf?\xa5\xbf\xccNyw\xc9\xbfH\x10\xb5\xe8@#\xf9?Pu\xc33@\x1b\xc0\xbf\xd1\xdb\xe3l\xbb\xf1\xd7?\xf9dI\xf6"\xc0\xca?\x9eQ\x92\xdf\x9b\x08\xdf\xbf\xe1\xcaO\x9a\xdd\xd4\xe1\xbf\xac\xc22*M=\xcb?)R\xe4B\x99\x00\xc7\xbfH\xf6\x1e\xb5\xd2\x8b\xc9\xbfe=}a\xf1\x16\xfa?e4\xce\r\xaa\xce\xe4?w\xf1\xdd23\xec\xa6?\t+IW\x8b\xb2\xe2?\xa3\x8e}@\xc8\xdc\xcb?`*w\xae\xd3\x13\xf1?Nt!\x9b\x85\x99\xa9\xbf\xef\x04\xf2\xc2\x98\xa0\xd1?I\xe0\x1bPq\x82\xe0\xbf\x8f*\xac\x1ei\xae\xcf\xbf.\x9d\xfb0\xf8^\xc5?\xcc\x9f\xab7\x12\x10v?4{\x02/\xc2h\xb2\xbfK\xa0\xf2\xf0\xd4\xbf\xc5\xbf\x16W\xaa\xa5y*\xd3\xbf\xad.(\x97b\x1b\xc9?\xd4G1y\xef,\xda\xbf*\x87\x07b{\x1b\xd1?s\x0c\x91{/\xed\xd8\xbf\xe0\xdcK\xc1$\xb1\xe3\xbf/\t$\x03\x02p\xc7\xbf\xbc\xf4\xca4\x8c<\xd7\xbf\xa5\x93\n\xe6\xf6Z\xc4\xbf!\x92Z\xe4\x80;\xd0\xbf\xc6\xfbv9\xfb\xd9\xc5\xbf\xf3\x02\xde\x86\x1c\xfe\xda\xbf\xb2\x15\xb2\xae&\x9a\xd7\xbf\xd64\xb7|\xb7&\xd7\xbf\xe6Q\x81n*m\xdb\xbfLm\x8f\x98u>\xd9\xbfg\xf5\x0bo\xe2\xe0\xd3\xbfW~\xcey3Dv\xbfn\xb2\xa1F\xb7\'\xdb\xbf3\x19S\xe0\xdcv\xd3\xbf\xc7\xcf@\x16\xad\x94\xe0\xbf\xee\xa1"\xa9\xb4|\xd8\xbf/9\x84\xf0O\xcb\xc7\xbf{\x8a\xden\xa9\x17\xc2\xbf\x13\xd9\x1c\xef\xf3\xed\xc7?\xbe\xab\t\xd0t\x04\xda\xbf\xbd\xcck\x8a\xa0M\xca?Dw\x82\x81\xd6\x96\xe1\xbf\xb2\xb8\xdb\xdfYj\xda\xbf\xa3\x87\x08\xfc%\xb5\xd6\xbf~\x9a\xf1\xecz\x7f\xa2?xP\x15\x8b\x1b\xb6\xdf\xbf\xdeui\xeb\xb7T\xe2\xbf\x85\xeb\xe9\x0c\xado\xca?\x19H\xf1b\xfd\xad\xda\xbf\x183\x1a\xce\x82R\xde\xbf\x11\xb5\rO\x11\x7f\xcb\xbfq\x9b\xdb&\xaf\xff\xd1\xbf\xde\x01*}F\x1b\xcf\xbf\xffW\xca>\xe3\x8a\xd6\xbf\x86\x1f\xeb\xcf\x8e\xf2\x85\xbf\x91\x16\x8cBrp\xcd\xbf\x04\x04E\xa1U\n\xd6\xbf\x97+\xe8]$\xdf\xde\xbfvK\'\x96N\xbd\xbd\xbfn\x96Wk\xd4\xfd\x9b?\x1c\x8b\x9cf\xf9\xee\xbf?\x16#\xb3\x81\xc0]\xdb\xbf\x0f\x95\xb0S\xa9O\xd6\xbf\xa1\x8c\xde\x06\x8b\xeb\xd2\xbf\xd6K\x87Y\xd3\xc5\xce\xbf\x87\xfa\xe6\xce\xb0L\xc8?\xd2\n\xffS\xc5\x8b\xd6\xbf\xdbY\x05\xa04\x11\xb8\xbf\x86\x07q\x83\xf0\x17\xdc\xbf\xf9\x1d\xc9\x8d\xff\xf3\xdd\xbf\x04\xe8\x033\xa3\xbb\xd5\xbfUyo\xcb\xbb\x7f\xdc\xbf(\xf3\xdc\x10\xdb2\xb6\xbf\xdf\x8c\xa6\xcd\xce\xa2\xdd\xbf\x16\x14\x1f\xb7\xf6\x8c\xaa\xbf!\xe0\xbc\x1e4d\xd7\xbf=\x9f\x1a\x94\x94\x07\xd7\xbf?\xcd_\x92\xb1\x8d\xe6\xbf\xd4g\x1d\x89\xd0w\xe0\xbfm\xa1d\xd3\xa8\x96\xdf\xbf[H\xb6\xc7I\xfc\xd7\xbf.X\xeb\x17\x87V\xdf\xbf\x9b\x1cz\xbb\x1e\xa9\xe0\xbfZ\x8b\xd3b\xc8\x85\xe5\xbf-c\x11q\rT\xe3\xbf"\x87eq\x8e\r\xe4\xbfw\x06=\xc6\xbe\t\xe2\xbf\x08H\x05\xf60\xe2\xe6\xbf\xa4\xa8nV\x1fc\xde?\x93\xa2G\xc2@\x89\xdd\xbf\xf7)hR\xd5y\xe6\xbfL\xec\x92W8\xae\xd8?\xa1\x80\x82\xf3&\t\xda\xbf\xa8;\x10\xbcfp\xe5\xbf\xe5\x83[\x13\xd0\xdf\xe2\xbf\xfe\x94!\xcbL\xfe\xd6?`<\xfan\x87\xaa\xea\xbf\x0c\xcf\xb4\x98\xbd\x02\xe5\xbf\xa2\xab\xbe\xd2\xaff\xe0\xbf\xe2/F"R\x17\xe6\xbfm \xa9\xcd\x17\xd8\xe5?\x7f\xb8\x15\xb5\xc9\xcb\xe8\xbfC\x1f\xf8\xae\x055\x90?\x88\x07Ms\x12\xd3\xe2\xbfZ\x85\xc7s:\xa1\xe5\xbfNW\xc2$\xcd\xd8\xe2\xbf\xdbvK[\xe2\xb4\xe8\xbf\xe3\x98\xecw\xc6\x17\xe8\xbf\x91\x1eb\'\x0f\x02\xe1?~\xa8\x1d\'\x0f"\xe7\xbf\x9f\x02\xe2s\xef\x11\xe7\xbf\xd0\xa6\xb2\'Y\xff\xc6\xbf\xac\x90\xee\t\xb2\xec\xe8\xbf.\xce\x02<\x90\x14\xe7\xbf\x92:\xa3\xe6\x1a\xb3\xe2\xbf~\xff\xc0\x87\xa6o\xc5\xbf\x90\x18_}\x89\xdd\xc7?\x87\xe9\x90BO\xe8\xe6\xbf\n\x1aVP/\x93\xdf\xbf\xdft\x08\xf5\x81\x9b\xd9\xbf!?rN\x17\xad\xe1\xbfg\xf5\xa9\xddH\x8b\xe6\xbf\xdd\xa2\x1f\xeb0`\xe5?D\xcc\xc1}\x18\x89\xd7\xbfp\xdeY\xd7*\x0f\xdf\xbfI\xc7\xc3*p\xb6\xe8\xbf\xc7\x8aM\xc3\x8f\xf3\xda?\x96\x1f\x0b\x8b7}\xe4\xbf\',\xefN6\x10\xc7\xbf{\xa29\xc7\xef\xb3\xda\xbf\xba/\x9a\xd0\xa1%\xe4\xbf2\x9c[\xb8l\xc0\xe1?\x89U\xb3D\x90\t\xe8\xbf\xe6\xc5\xea\x0b\xf5\xeb\xe2\xbf2\x15n\xb4\x16\x9f\xe6\xbf\'\x12\xf7e\x1c~\xe6\xbf\xb8\xe8\x80&<i\xe5\xbf\x9d\xcb\xfa\x18$>\x98?s\xa4f\xe0\x85\n\xe1?\xb9\xb7\xe8\xad\xcc\x18\xe8\xbf\xfbd+\xa8p\xeb\xe4\xbf\xf58Fs#o\xd6\xbfX\xa3 d"V\xe1\xbf\xb7U\xe0mp\x19\xc4\xbfM\xe8\xa4\xc2\xc9I\xd4\xbf\xb2C\xe3\xb3\x8c\xd2\xd7\xbf\x8b>\x91\xc4\xaen\xc8\xbf\xd6<\x18\xebXH\xd6\xbf-h\xefi\xfd\xa7\xdc\xbf\xe7\x8d\xb3\xfbB\xa0\xd8\xbfa\xcb\n]\\G\xe0\xbf\x05\xfb\xef\xd7o\x8f\xd2\xbf\xd7\xba\xdbmd\x19\xd7?!\xb3\xb7\xc9\x90W\xdb\xbf\x88r\x16\x1fB\x82\xd8\xbf\xba6m<8\x1f\xc0?\x86\xddZ\xdc*\xaa\xd7\xbf&2DS/\xd7\xd7\xbf\xc9\x89WQ\xa1\xd6\xc8\xbf\xd5\xd9\xf5\xb3\x05\xd6\xd2?\xbc)\x9e\x13\xda\xf1\xd9\xbf\xb9\x82M\x1f\xa0v\xc2\xbf<\x18\xb4/#\xa8\xdc\xbf^Xk&\xab\x8b\xdd\xbf\x18\x18h\xa9\xd4\xa9\xe2?y\x9bz\x9b\xd9\xa6\xe3\xbf=\xd2.#r\x06\xa3?\xb8\x89\x9a\xda\xa0\x02\xcd\xbf\x85\xcd\xc4h\x90e\xdf\xbf\x8c\xaf\xaewJ\x99\xd3\xbf\xb8A\xf2\x8e\xe0\xd3\xd5\xbf\xe8\xde\t^F(\xcf\xbfJ\t\xa2\x0e\x9fg\xdc?\xe8R\xdeE\xd4\x97\xd3\xbf.<#\xeb\'\xc5\xdc\xbf@\x9bK\x82\xab.\xc4\xbf\xc6\r;\xff\x06\xe5\xd4\xbf\xbf\x95\x88\xfe\xfaE\xd7\xbf\x16{\xcf\x04\xaf\xc4\xd1\xbf\xd6m\xc6\tp\xbd\xd6\xbf\x0c\x93\xa1>\x06\xbb\xaa\xbf\xf0n\xf8_q\xac\xd7\xbf\x8d\x86i\xb5\x19\xeb\xd7\xbf\xe1\xec\x9c\'\xd2\xe5\xdd\xbfcX\xaa4\xde\xa7\xbf\xbf"\x96i\xfb\x95N\xd5\xbf\x0b\xe7\x96\xb0\xaaW\xe2?\xbe\xc41y\xb1\xaf\xd1\xbf\xe7\xdd%q\x8e"\xd1\xbfZ\xe5\x08\x0e\x03\x12\xd8\xbf\xeb\xf2\x7f(\x18I\xda?\x15\'v\xf0\xdaR\xc4\xbfu\x96\xd8\x86\xda\xfc\xd5\xbfG\x98{\xa8x\xb3\xd0\xbf\xddf\xee\xe5;\xa3\xd2\xbf\xcaQ6S\x16\xd4\xd0?&-\xf5\'\xb2\xe5\xd2\xbf\xd0\xd0eZ\xa4\xaf\xd9\xbf8\xf9/fE\xac\xcc\xbf\xba\xce.9\x9f\x00\xd6\xbfu\xfe8\xd3\xc4O\xcb\xbf\xd2\x04k(\xbe\xa3\x83?K\xc9#(_\xb1\xdf?\xa3\x9a\x16z.\x83\xd1\xbf\'\xf1\xdc0"\x87\xcb\xbf\x8c?(\xd6S\x9c\xdb\xbf\x8cs\x01\xf1Qh\xdf\xbfV=\xd5\xf2l9z?\xa9 X\xbb\xf3S\xe0\xbf/5\x92\xa8vI\xc7?J\r\x85\x08R\x06\xe7\xbf\x8e\xf7-\xabL\x90\xec\xbf\xd6\x93\x1f\xf9\xffp\xd8\xbfh{\xe2\x94~\x1e\xe4\xbff\xb4-\x05w\x9d\xd9\xbf9\xa9FR\x98V\xe2\xbf\x00\r\x17\xc8D\xc0\xcf\xbf2\xff\x12}\xf2\xaa\xe3\xbf\xe4\xab\x1f\x1e\x00\n\xe6\xbff\x1d\xd3\xfa\x8e\xc9\xdb\xbf(\xcb\x8a\xcc\xac\xec\xe0\xbf\xdc\x12\x9e\xac\x9c\xa5\xe3\xbf\r\xecm\x1d\x90\'\xea\xbf{\xe1\x1aHFB\xb8\xbf\xf7=D\xb1\xc0^\xe2\xbf6\x1f\x00\xf0\x96\x03\xe6\xbf&*\xedK\x05$\xe6\xbf\x81\xf7+\xf7\xcd>\xe3\xbf\xec\xf7bP\x99w\xc7\xbfD.\x7f\x90\xc3`\xd5\xbf\x0f\xd1\xb5\x86fj\xd0?(\x1e\xee\x81\xa3\xa2\xe8\xbfk\xbe\xe3vj*\x98?\xf8\x8c\xfd\xa2\xe0\xa6\xea\xbf^\xf9\x1e*\x18\xb3\xe2\xbf\x1d#\x90J!\xdf\xe5\xbfr7\xa8\xb1v\t\xae?\xa5g\xadX\xdfW\xe6\xbf7\xe1\xc4\xeet\x10\xe8\xbf\xaf\x1b\x19q\xdc#\xb9?W\xd0\xda\x7f\xa2{\xe2\xbf\x17\xfc@\x14\xd9\xcc\xe7\xbf,\x8e0+X\x93\xe6\xbf\x01\xbd\xff\xf9\x1ap\xd9\xbf\x16\x17z4N\x89\xd7\xbfD\xeb3\x1e\x1c\xbf\xe3\xbf\x16\x98V+\xce\xd3\xbb\xbf\xa5\xfe\xdb7\n<\xd8\xbfv\xd0\xbbfW\xc3\xe8\xbf\x0bF{\x84\x1b\xfb\xe6\xbf\x92\xd5\x02\x07.\xdc\xc3\xbf\xd8\xf0Q&\xaf3\xaa\xbf\x86\xbc\xa2\x8d\xc2IL\xbf9oa\x0c\x06\xff\xe4\xbf\xf2!\xef. )\xd4\xbf\x1cK\xe1\xe4\x8f\xa8\xe5\xbf}\x14%\x84\xfc\xd9\xd8\xbfn$*\xc3[\xd0{?2=\x0b\xb5D\xe2\xe5\xbf\x8c\x10I\x81P\xd5\xbc\xbfn,4\xb3\x1a\x9f\xe6\xbfd\x8d\x11\x96\x11\xf8\xe7\xbf~,\x93\x11e\xa6\xe4\xbfb\xf0"\x0eTt\xe6\xbf9wNZv\x08\xd9\xbf\xe5L\xb4fu\x08\xdd\xbf \x80\xdc\n\xfar\xc1\xbf\xd0\xe6\x9c\x86Pm\xe5\xbfo\x11\xda\x11\xeb\xa0\xe6\xbf'
p21
tp22
bag2
(g3
(I0
tp23
g5
tp24
Rp25
(I1
(I20
I128
tp26
g12
I00
S'H\x08\xbd\x1c\x92r{?\xa5\xd3p)\x9e8\xc1\xbf"/I%H\x02\xda\xbf\x0c\xee\xab\x8ci\xb4\xbe\xbf\x90\x1d\xc1I+\x0c\xa7\xbf\xb7w\xa3\xffG\xfc\xcc?\xe1\xd52\xe0,W\xd5\xbf\x9a0\xb9\xe5\x88\xef\xd1?\x81\n\x9d\x08l\xe7\xa4?\xc4\x87A\xb4\n\x15\xc3?b;\xd1\x97\x0f\x10\x93?\xfa\xe7~\xff5k\xd9?G\xcc\xde]\xa6~\xb7\xbf\x86\xa1\xf5e\n@\xb2\xbf\x0c\x01GD\x18\xc4d\xbfC\x89\x96\xe6G\xb5\xd0?,1\'\xa63\x93\xc3?\xce\x91\xa1\xa6O\x06\xce?\xad\xd6m\x17\xdb\x96\xd6?\xc97-\xc8\xcdA\xd0?\xbf\xb4\xc6p\xa7\x85G\xbf>*3\x15\xe9\x93\xca?\xda\xe5\xf7*1\x0b\xd4\xbf\xebR\xdaV\xfa\x8b\xdc??\xfdQ\xd6%\x8c\xc0?\xaeb\xa1\xf2\xbc\x9f\xbd\xbf\x00"\xc4\x13\x84\x95\xd4\xbfT\x9b\x19{\xa4\xdf\xa6?\xdd\xa2\xa5\\\xdc\xb1\xd6\xbf\x9c\xae!\xd3\x86\xda\xb1?W\x07\x19H\xe2\xd7\xd2?t\xb2\xe6&\x97\xb1\x98\xbf\xb4\x98\xc2t&\xa2\xc5\xbf\x14\xfc=l\xbaE\xc1?\x84O\xe1\x8f\x9c;\xd5\xbf\x05\x10\xce\x1f\xf1:\xd1\xbf~)]e\xd29\xb2\xbfD\xa3w\xde\x08x\xcc?P\x82J\x98i6\xd6?\xc7\x95;MD\xd6\xb1\xbf\x87\xfd\x0f\x0b42\xda?v\xf4(\xcb@\x1f\xa8?\xbb\x95IKZ\x16r\xbf\x04\xfc\xd5ph\x15\xc7\xbf\xe0\x83\x17\xda\x7f\xb1\xb3?\x7f\xf0k4c\xd7\xa9\xbf<(\xd5\xfb\x16\xdd\x95\xbf\x9f\x83\xf7u\xa4\x08\xa8\xbf\xc6\xedQID\x96\xa9\xbf\xf5k\xf3\x9d\xce\xca\xae\xbf!\xe9\xd8\xcc\x8cO\xc7?\xf1<\xd1\x96\x9e\xd7\xe2?\xab>\xdf=(\xbe\xa5\xbf\x91\xea\xf4n\x8b\xb6\xc3?\x81o\x86\xc1\x07\xaa\xd8\xbfc\xcc\xea\xcf\x9aH\xd2?\rx\x0f-\xd8a\xbf?\xad\x08t\x05F\xba\xd2\xbf\x97,\xf2\x8eR\xf4\xbb\xbf\x82\xfe\xa3\x15\x91\xeb\xd8\xbf\x86x`?\x1c\xae\xa4\xbf\xb1\x86\xc9i\x12\xc1\x9d?\xcd\xc3\xd3L\x97b\xaa?\x91e\xae\xe1J+\xb1?\xc2\xd9\x92^k\xdf\xc1?i\xab9l\xc7\n\xd9\xbf5L\x05o\x9d\x0b\xb1?@B\xcf:%\'\xd4\xbf\x03\x82\x80*p\x0b\xb3?@\xb0\xcc\x92\x0c\xb2\xdd?Z2\x1d:s\xe0\xc3\xbf\xac\xce\x06(\xab\xd7\x97?\xfd\x1d\xe6/\xff\xba\xda\xbf\x97\xad\xab\xa8\x12I\xc7?vt)c<|\xb0?R\x82\xf9\xeb1\xe1\xd8\xbff\xd2\xb5\x9a\xf6\x95\xb3\xbf\x92\xe5\x05\x98/\xcc\xc1?AD\x10\xbb{\xe3\xcc?\x9c%\xf5\xd0\x90\xe7e\xbf\xc9\xfd`R\xf5\x81\xb0?7ND#\x07\xf4\xd5\xbf?\xbd\x8f\x91\xa3]\xd3?\xc87\xeb;\xd70\x9a?\xb5\xfe\xe4K\x92\n\xdd\xbf&Mt\x1e\xfb\x8c\xce\xbf\x82g\\?\x01f\xa2?_L\xc7z\xf6\x9b\xd2\xbf\xa95`\xab\x0fls?\xe8}\'\x1eDU\xe0\xbf\x98\xd7\x99\x8dx.\xb8\xbf\xec\x87\x04\x8c\xb1\xf7\xda\xbf\xcb]\x15\x94\xb6\x04\xa2?~\xe1\x9d\xa8q\\\xd5?4L\x1aLrW\xba?\xc5|%\x9a\xe7\x84\xdc\xbf\xf7\xdc\xc2U1-\xbd\xbf\xc6~\xbc\x133q\xd4\xbf\xd1\xcd\x0b\x15k\xa8\xc1\xbf\x03Z\xef\xdf\xdb\x85\xd9?<y\xda\x05O\x81\xbf\xbfT\xb4\x0e#I@\xca?\x03+^\xd16\x8e\xcb\xbf\xf1\x9by-\t\xf8\x84?1U\x01\xa8^^\xd7\xbf\xac\xb2B[\x0e\x08\xc9\xbf\t\x17]XX\xed\xc3?o\xaaj\xef\xf6[\xd5\xbf\x93\xb3\x9e\xda\xde3\xdb\xbf\x0c+P\x04\xc5\xaf\xd5\xbf6tg\x11\x86A\xa1\xbf\x89go\xbd\xa9\xba\xd4\xbf\xad\xb63\xd5\xf1\xbe\xc4?N\xda\t,\xb8\xc5\xd8\xbf\xd5(l\xe1\\\xea\x80\xbf\x89\xf8\xe3\xb1v\xa7\xce\xbf\xed\x1e8\xe0*K\xb2\xbfAS\x08i3\x99\xd1?F\x9d\xa6\x19\x11\'\xbd\xbf\x04\xbf\xf9\xf2\xd5\x98\xdc?\x84F\xdd\x99\xdd,\xd8?\xd7\xadL\x8f\x04\x9a\xdc\xbf\xcaYO\x12\xd0R\x9b?\x1b\x19\xab\xa3Ru\xa3?\x1f\x97\x96\x06\xb9o\xdc\xbf\xab\x80\xcb\xdd\x0e\x00\xd2\xbf\x0b\xbdE\xbf(\xfc\xc7?mM\x85\x18X|\xcc\xbff\x16\xf1^\xa4\xd6\xda\xbf\x1b.:D;\xdc\xe0\xbfcu\xc4\xd4\xb1u\xd7\xbf\xa9\x89.\xe7\xd8$\xe2\xbf\xf8\xe9o\x85Z\x9b\xe1\xbfa;\xd8\xc8_2\xd6\xbf\x82\xa0\x84\x06\'\x1c\xd7\xbfM6f%\xa5\xf0\xd5\xbf\x89:Q\\*>\xe2\xbf\r\xbed\xcat\x9e\xe0\xbf\x17J\x0f\x9f\x94Q\xe3\xbf\xde\xd3\xc7\x9d\xf9[\xe1\xbf\x19\x01\xee\x97\xa8\x97\xe3\xbf\x1a\xa1\xba\xdf\xbe\xcb\xe4\xbf2\x83\t"\xe8\xcf\xe2\xbf\xf5\\:Q\xf5\xe4\xdb\xbfE\x04\x18\xc4\xbd\xfe\xe2\xbf"GZv\xc1\x1e\xe1\xbf\xb2+/\xcaC\xf5\xdf\xbfe\x8d\x8d\x1b\x07\xbe\xd6\xbf\xeai_9\x8d"\xda\xbf3c\xec\xd4\xcd\xbd\xd5\xbfw\xb0q\xbfb\x0e\xde\xbf\xf0\x1d\xe2\xe0\xa8\x18\xde\xbf\xca\x00\x8cK\xd6\x00\xd7\xbf\xde\xfc\x93\x8b\xa3i\xe4\xbfU\xeeU2\xc6\xcd\xe0\xbf\xde\xfb\x18S4R\xd1\xbf\x1e\x9d\x0b\x84[4\xd4\xbf\x9c\xb9\x0e\xe5\xe1\xf2\xe2\xbfi\x8bI\xc9\xcd\xd9\xe2\xbfQ\xcb\xccp\xa0\xc9\xdf\xbf_\xb9n\xb8\x95I\xe2\xbf8\xe6\x86\xd0\xfe\x97\xe3\xbf\x96\xaeZ\xb4\xe6C\xd3\xbf\x8a*\xd9\x87\x9d\x96\xe4\xbf\x8d0\xab\x855\xe6\xe3\xbf\xae\xee\xdc\x81\xfco\xe3\xbf\xd8/\xc4e\xad6\xcd\xbf\xe1\xb6\x1e\xa7~\x8f\xd0\xbf\xa1\x14\xd3\xf2\x01h\xdd\xbfZ\xd6OH\xb8\x86\xe0\xbf\xf5\x9bP\xa22\x87\xe1\xbf_\x1a\x8d\xb1Ip\xe3\xbf\x97g\xf9q\xad\xcb\xd5\xbf\x1a(\xc2n\xf5\xf8\xe2\xbf\xc8\xfcf\xd1\xbas\xe0\xbf\xcc\r}\xa6\xdbz\xe2\xbf\x91\xf51_\xd6y\xe4\xbfK\xac@T\xcd\xa7\xce\xbf >\xbcW\x8b&\xd1?\xdd}3\x97J\xcd\xce?\xf2\xcd\x92O\x96\xde\xb7\xbf\xf9s#\x98M\x83\xd0?\xc5\xe4l/w\xcc\xe0\xbfY\x1e\xf7q\xadH\xd9\xbf\xdb\x7f\x16\x1f\x8fc\xde\xbfA\xd0\x05\x9e_\x12\xe1\xbf\xa5x\xc9GGi\xda\xbf\xd8\x99\xc4\x8f\xa1\xb1\xe4\xbf\xe2\xe9\x12\x1fbO\xe1\xbf\xe7zL\rs\x8b\xdf\xbfDH}\t\xb2\xa3\xe0\xbf\xb9?g\x874J\xdd\xbf\x0b\xb340\xd1%\xd8\xbfj9\xd7\xb0b<\xde\xbf\xfe\x90\x0c\xe8\x8f\xa0\xde\xbf\xb5\x86b)Tj\xd0\xbf\x8a\xd6\x91K\xe4\xf6\xdd\xbf%s\x82Q\xe3\xc7\xbb\xbf\xe2BL\x91\xb0\xa0\xe1\xbf0\\\xa6 F\xc1\xd0\xbf3#\xb9\xe6\xa9\xe0\xd7\xbf\xfcB\x07\x05\xfa\x99\xdf\xbf\xd7Z\xc8\x16\xa7\xfb\xc6?\xaa\x0b\x86\xc7?\xe0\xd9\xbf\x17\xa0\xad\x1e\xa4\xd0\xe4\xbfD\xd6\xcaGA\xd2\x90?\xd2@\xbd.\xd5\x18\xd4\xbfm\x91\xcfD\x85z\xdf\xbf\x81\xbc\x83uO<\xd0\xbf\xb8y\x9e/\xe50\xe7\xbf\xae2\xc80\x0c)\xd9\xbf\x14?\x0f\t\xaf_\xe2\xbf\xf7\x1aZ\xba\x12\xa8\xdb\xbf\t(\xbd\xf0\xbe\xf4\xe2\xbfwAQF.o\xdb\xbfc\x8b`=\xbb\x7f\xe0\xbf\xe6-\x05WxR\xe4\xbf\x02N!\xde\x87\x15\xe4\xbf\x117\xf9\xf3z\xfa\xe0\xbf\xb7\x0e\xe8\nP\xeb\xd9\xbf\xdc\x17\x88BvH\xc5?wc\xfa"\x86Jn\xbfq\xce\x12\x91Ha\xb5?+\xb2^OG\xd5\xe5\xbf2\x8b\xc6\x7f\xcbJ\xe3\xbf_\xc8\xa1?\xca\xc6\xe2\xbf\\\xca\x0f\xd89\x9e\xdb\xbf\xdeq\xaf\xfa\xbd\x1e\xd8\xbf\xcd\xde\x1d\xed\x13\xd7\xb0\xbf\x11\x83w\xb8;\x1c\xd1\xbf\x15\xfc\xb0\x82T\x12\xe7\xbf\'\xad#\x7f\xf6d\xe3\xbf\x9e\x9bf:Vr\xe4\xbf\xcd\xaes\xf2\xf9*R?\x87TvG\x0b1\xe2\xbf\x07\x87\xbf.S|\xdc\xbf\xde\xfb\x97E_d\xe5\xbf\xeb\xbci<\xb88\xdc\xbf=\xc1Q\xe0\xad\xda\xe1\xbf\xea\x15h5\xf4`\xdf\xbf\xc8\x13\xb5\xe8A\xe2\xe0\xbfWE\xd4\xb2\x19\x06\xe1\xbfe\xef\xbd.\x16\x17\xe2\xbf\x06\x87\xb0\'Q"\xa1?\xecp`z\xf5\x95\xe3\xbf"\xac\xb2x\x00P\xcc\xbf\x85 w 3#\xb3\xbf@H\xf6\xda\xd6a\xde?\x03z\xd2/%\x98\xc6\xbf\x1bTW\xe8\xe8\xdf\xdd\xbf\x12\xf2\xebi\xa1\x9b\xe2\xbf\x00\xf8O\xcc\x9f\x8d\xca\xbf\x04W#\x15\x1d9\xe1\xbfw\x82sSP\xb9\xdd\xbf\xae\xd1B\xb5i\x03\xe7\xbf2\xa5\xc2+FV\xd5\xbf\xaaC;i\x14\x1e\xd8?\xdd?\xa7b\xd0\x92\xef?(\x8c#[Oe\xe0?\xdb\xcadT\xbe"\xdd?\xe29\xcd\xc2t\xed\xe8?\x9a\xa4\x8a_ae\xe1?|\xb6\x81GrL\xe5?K\xed=\x8a\xae1\xda?-\xe3\x0et\xb18\xe7?\xf8\xfd\x1cRDl\xe1?\x8b\xe1\r\x80)\x0f\xe6?\xa1\x10\x9e\xae\x95\xe2\xdc?8\xd6\xc0\x95\xde?\xde?\xb0>\x80\xf6F2\xef?\x11i\no\x92\r\xea?\xcd\x85\xc3\xf0\xaf\xb7\xe2?]}Z\xa0J\xf1\xe1?\xfb\x8f\x90\x07\x80l\xe3?\x14\x16E\xa08w\xdf?,\x02\xa6\xd0ja\xd5?\x8aDY\r\xb0V\xda?\x88\x1b\xbei)C\xd5?P\xaa\x01\xf9\xa9\xe9\xea?tX\xd5>\xdbt\xd2?\x90O\x83\xc6`\x86\xe1?F#a\xd6F \xe5?\x17]\x006\xd7\xd5\xe6?\xcd\xbe\x1d\xa27E\xe7?\xd9\xa8\xbc\'\xdc|\xee?G\xc9[\x9c\xd8=\xe7?\xc4Tz\xd5_D\xe3?\xb0c\xd3Pri\xee?\xfesG\xff\xd6\xb8\xd5?\xfbU\x93-\x1dx\xe4?\rPU\x9fW\x97\xe8?U\x80\xdev^\xcd\xf0?\x9aA\x05C\xc8\xe5\xe5?\xdd\xadP\xe3\x97A\xde?\x15\xcd>6aQ\xea?\xa1f\xc6\x9c\xffS\xe6?\xf4\x95\xea\xb0\x90\xc3\xd6?\xeb^\x96\x9ff\xbd\xe3?1\x00\xda^fl\xe8?W\xd18\xbe\x91l\xd7?[uL\x9e(\xff\xe7?o\x07\x83W_\xc0\xe7?\n\x19\x98\x04\xabw\xe6?\xc31\x04\xc0\xf6*\xeb?tB*\r\xfaZ\xe7?\x99\x89\x96\xcczG\xe1?\xb1NyV\xef\x85\xc6\xbf[\xbe\xfa\x9e\xb7\x11\xd7\xbf\xec\xfd\xd7\x85\xb6\r\x9a?\xb5e\xee\xa1\xb6\x90\xa3\xbf{\xa5\x95\xd3f\xd5\xe8?\xbe\xca\n\x80a\xab\xe2?\x07\x99y\x0f\r\xb1\xd5?\xf8\x93B\xa2\x93N\xed?vr\xd2\x1doQ\xe0?\xe4\xd3H\x98/\xda\xf0?\xb6\xbc>B2\x95\xf0?\x17]\xa9\xef\xbe\xee\xe3?\x86A\xa0\xb3,U\xe0?\x97\x11\xf0\xa5\xb3\r\xea?\xa4\x0e\x04\xdc\x84\x7f\xe5?`\x86)\xcd\xd8_\xe6?\xe8\xb3\xf0\xfb\xa8\xb7\xe6?+TL\x93\x8e\x10\xeb?e7W\xf3\xc3\x9f\xe9?\xf5y{\xd4\xf9m\xcf\xbf\xc7\xf5\xa0QM\x0c\xd8?\x00KW\xdf\xf5t\xdb?O\xd6-a(\xca\xe4?\xdb"\x19\x1b?\xc2\xe2?=\xf6K\x7fq\x99\xc7?\x89E!\xe4\x8b7\xed?u~%\x1b\xcf\xc2\xe6?\x1a\xfaS\xa6.o\xdf?H\xd5\x93|s\xc8\xe2?\xee~\xc3\xddw\xdf\xe5?\x00\xd1\x9624~\xd0?vuV7\x8e\xdd\xef?\x07\xba\\\x85\xb0\x07\xe2??\xa2\x82\xae+\xb7\xe0?u4\xc8k/\xd5\xe9?dmm\xf3\xd7\xb5\xe5?\xe0\x8c\x7fW\x19p\xdd?\xe7|:|x\xdf\xf2?\xaehTl\xe0%\xe7?t\xa5\x86R@\x05\xd3?\x1eM\xc6\xdbN\x0b\xdd?\x7fO\xdb I\x9d\xeb?\x06#\xc8\xfc<\x96\x88\xbf\xa8\xbe\xac\xe2\x9d%\xd0?\xec\xf0\xa8H\x91\xfe\xb6?\x8b\x19\x14f\xc6\xf2\xf0?\xb9\x82\xe2U`U\xe6?\xa6H\xb8`\xf8\x87\xe5?\xe1G\xac:\xe6\xb5\xe5?s\x8d\r\xfa>\xe3\xd3?]\x06j.n\x9e\xed?\x1f\xae\xea\x1f\x96\xfc\xe0?\x02rE\x99\x03Q\xd8?\xfa\xa3\x1e\xdf\x0cn\xea?\xffG=<\x9f\x07\xd0?\xb8\xfa\xb7#|\xce\xcb?\xa8\x19;\xf0`\x93\xdf?\x1aH\xcf\xc3d\x80\xe6?-^\xc1\xec4\xee\xf1?\xd5\xee#i\x12J\xe4?\xbeG\x9e"\xc6[\xe2?8\xd4\xd13\x8c\xe7\xe5?@\x13Z\xc2\x1a\xdb\xe9?0\xde$[1 \xa3?\x90\xa9\x81\xb7\x04i\xdf?A}\xbd\xdf8\x8e\xd0?l \xe6;\x1f\x00\xe2?Sy\xdfG\'\xb5\xd4?/\xfa\x12z\x03\x1c\xba\xbf\x9c\xbf\xa2#\x04\x9e\xd5\xbf%\xe3\xdc\x07\xd9\x1e\xca?\xe8]\xbf\xc8\x03^\xef?\xa1}\xfcNt;\xe9?\xd0n\x03\x02\xa8\xf6\xba\xbf\x07-7n\xa2Q\xf2?1\xb3/.\xf4\xc8\xe5?\xc5\xcc\xcb\xf13\xe3\xde?\x95\xe6g#a\xd9\xe5?\xb9b\x0b]\xc3z\xb3\xbf\xdaP\xfd\x15\xe7\xb1\xe0?gQ\x18\x1a]\xc2\xd2?_\xe3w\r\xb0\xc0\xed?\x85\xb3J\xfe\xea\xc1\xed?\x11\x08\x03M\xd5\xaa\xe3?}\x0c\x1d\xbf\xaf\xeb\xed?#\xf3_\x0c\x8aL\xed?Y\x16.\xc6\xedu\xe7?\xcd>\x19]\xe2p\xe9?w\xbd\x929\x86{\xde?\xd7\xe9\x9d\xc1n?\xe7?\x1fc\xbc\xa14\x94\xf1?E\xe2\xeal\xc3\xad\xe7?\xc5\xb9+\xc2\xff\xbf\xe5?\x86\xd2\x82\xa1\xfd\x0c\xec?\xa8\xbf\x91\xd5Q\xd2\xe8?\x1d\x0bh$D\xcf\xe1?0\x87ASc\xd9\xe0?LN\xee\xc0\xe4\xa7\xe4?\xf5\xae\xaaW\x83\x9f\xef?6?\x96\xe2\x98\xc6\xdc?\x86#\xfd#\x848\xe3?\x02\x9d\x10]\xd2\xd8\xd3?\x0b=:\xce\xd0\xc0\xe8?\xb54\xdd4Y\x0f\xeb?\xe2\xbb\xee\x83\x9dA\xe9?g\x14}\xa8{\xed\xf1?\x8b+\xef\xfd\x94O\xe8?vo\xe3&\xf8\xe8\xe8?\x86\x96S\x8d\x96\xcf\xea?\xbf\xf57u\xa2\x97\xb6?\x0fy\x98\xfaj\xef\xed?\xd0X\x91Zjt\xe8?\xec6\xbb\xaf\xbb\\\xe4?w\xdc9\x9d\xe0\x90\xc1?\xc8\x96\x02\x0c\xa2\xad\xef?\xcd\xe0\xd7\xa9\xb5\x9f\xdc?c\x1a\x8d\xcc\xb4\xab\xee?\x84\xd0\xaf\xcf\x01u\xf1?\xc7Fi\xf2\x88\xb0\xa0?]\xf8\xb5f\xb1\xcf\xe7?M\x8ezf\xd0\x9b\xef?\x14o\xe0\xa8\xb1H\xd5\xbfs\xd4J.V$\xe5?W\xce\x9ch\x94\xb6\xeb?*\xcc\xc2\xd1D\xfd\xe6?\x06\t\xf0\xad{r\xee?\xd3D\xffe5q\xe1?6\x06\xcc\x83\x0f\x82\xda?\x0e*\x04\xe7\xdbr\xce\xbf\x1d\x94\x9f\x91\x91\xfc\xd8\xbfY\x14\xcc\xec\xc9\x1c\xc8?a\x7f\xf3~&0\xda?\xb5\x06\xbf\x9a\xbd\x8b\xe7?M\xb4:GQ{\xe9?\xb5)\x03I J\xf0?\x16\xd2Iu\xa4\x07\xa9\xbf\xe7\x8ex\xea\xa3\r\xee?{\xac;\xbco\xed\xe8?\xa2\x1b\x18\xa6BT\xe8?\x90\x00\xadh8\xd2\xe1?\x924\xfc\xf5\xebY\xdd?\xca\x93ZH\xee\x1b\xe3?.\xf9\xc1\xe1\xb4<\xd6?e\xccg\xa38\xaf\xe8?\xa2\x96\t\x9cR|\xe3?\xa0\x8f\x82&\x9e8\xe2?\xfeg_\x00:\x16\xea?\xf0\x8d\xaa\x18j\xbe\xf2?Y\xa5\xd9\x0f\x17\xfd\xe4?\x9a|\x158b\xaa\xf2?\x99\xc3\xc1\x80<A\xed?\xd2\xff\xc4\x17ue\xe9?\xee/X\xf5?\xb6\xe5?\xc1\xeb\n\xec\x88\xd7\xe8?q\x89\x15&9\xb9\xed?\x10\xfcIQKv\xc7\xbf-\x03\xa0h\r\xba\xdb?\x1d\x8e_\x86xC\xe4?\xfdn\x15\xb4\x91\xc9\xf1?\x9fS2\xe5\xc9I\xd8?"n\xd0%\x95\xff\xe3?\'\'\x87\xcdf\x00\xeb?\xcb\xcd,\xf4\x01\xd5\xe5?C[\xf4\x810\x12\xeb?\xdf\xfc\x85\x17\xcd\x19\xf2?|\xf3B\xea\x81\xc8\xe2?\xa8DCZ\x95\x07\xea?\xa3\x18\xf2\x91\n\xfe\xde\xbf\x06\xe7\xf7q\xbf\xa9\xed?\xf8\x92\xe6\x92\x9b\xa9\xda?\xcdg\x86\x7f\x85D\xe0? \xb8JP\xa6\xb3\xd2?<\xe1\xfd\xf7\xe4\xef\xe4?\xf0\x14\xc334h\x90\xbf\x9b\xfcr\x17(\xb5\xef?\xc7 \x83\xaa\x9b\xf4\xea?&\xcb\xe6\xc6 [\xf0?%\x83\xb8\xd6\x18\xfa\xdf?\xa4\xaaQ\xfdc\xa4\xe0?\x7f\xb5\xeb\xd5z\xde\xe3?w\xf3\xa7\x7fwk\xeb?<Sdv.\x14\xed?*0\xd8}mJ\xbd?\x8c&\xda\x02\xd8\xe6\x96?N\xa0\xd5\x06Z\xe6\xe0?\xaad\xbd\xa4\xa5 \xe7?j\x96D\xb6\x9aY\x86?-LJ\xd0\xca\xc2\xea?N\xdc\xe1\xa4u\xba\xe4?\xa1\x1e\xc1Q\xdb@\xeb??\xc5bU\xef\x19\xf2?\x83\xb9\x11Sx\xc6\xd4\xbf\xa2\x8c\x11\xd0lJ\xee?IKV\xda\x926\xd5\xbf\xb3\xa2F\xd9\xd1W\xe7?\x81p/\x0b\x94\xd0\xf5?\xb7\x15\xbd\xfa\xd8\xa1\xa6\xbf\xd2\xa8\xe2\xf3jj\xb3?\xfa\x96\xe5iy\xf1\xf7?\x07\x9d\x9cr\xfa\xc3\xe6?\x9fh\xd5\xa6>\xda\xe5?9?\xa7#\x90\x86\xb5\xbfY\x91lez\x0e\xa4\xbf\xcc\xeec\xf9\xb5_\xe9?\x8b"9$\x1f\x11\xde?E\xa7\x8di\x80\xe8\xe8?\x8e\x89\xf6\x98\x96\x8a\xc1\xbfm\x87\xe0G\xcaH\x95?\xc3\x10G\x17}:\xad\xbf\xe1Bz\x1c\x7f\x9a\xd1\xbf\xaa\xae\xbdV\xc9\x02\xb5\xbf\xd64<KIw\xcc?\x96\xd3\x04\xfc\xf4\x8e\xc3\xbf\xb9q.j\x159\xb1?A\x10;P\x91\xbf\xab\xbf\x8e\xd0W\x87\xcd\xc5\x81?\x89\xdd= v\x9e\xc6\xbf:\xc5\xb3\x03+:X?#\xadnE\xcd\xd3\xd4\xbfz\x9f\xf6M;\x9c\xc5\xbf\xe3H0\xb0\xc0:\xc7\xbf\\\x99\xa3),\x9a\xb8?_iT\x8b\x13\x04\xae\xbfj\x00/t1\xa1\xb2?\xc2a\xbd\xd3\xfc\x9d\xb7\xbf\x8a\xb6\xe6\x89S\x95\xc1\xbf\x0b\rO\xdb\xfb\xce\xd0\xbf\'\xa6N\xd6\xb82\xa8?\x91\xb7\xe7<\xcba\xb1\xbf\xb5\xfb6\xae\x12\rR?~L\xc9s\xdey\xc9?\x88b\x9a\xcc?\xd6\xd3\xbfN.\xc0n\x1d\r\xca\xbf\xe7\xadJV\xbd\xfb\x9e\xbf\x84_\xda\xa1S\x80|\xbf\x9a\xa7]\x16Im\xbd\xbf8v\xfap)5\xa2?\xfci|\xf3CA\xb5?\x95\xe9\x0b\xf1\x8dc\xd7\xbfO]T\xe6W\x01\xb2\xbfA\xd9\x02\xa5\x06\xe4h\xbfXy\xcb\xdf\x1a,\xb8?\xa5\xb1Zc\xc2-\xcc\xbf\xeb\xda\x8d\x991\xe0\xc1\xbfY6\xa6\xc69\xca\xc6?\x16i\xcb\xfe=\x04\xd4\xbfr\xc0\xd4~qN\xb4?\xcd\xe1\xa2\xe5>\xf5\xc6\xbf\x17\xaemq!G\xc1\xbf\tL\x84\xdf\x99\x1e\xd5\xbfAB\xf4o\xfe\x9d\xb2?\x06m\x08y=Z\xd0\xbf\xfdDE\x82>h\xc1\xbf\x01Rd\x15J\xe4\xb6\xbf\xae\xc5\xbcw[7}\xbf\xcc\xb5\xa8\xf2Gf\xcd?U\x8b=\xdft\xa3\xdd?\xc6j\x1c\x0e\xa0\xf9\xda?\x00\xef\n\x96\xe2(\xd3?\xe6\xa2\xaf]A\xf6\xe5?\xe5\x9e\xeb\x93Q#\xca\xbf\x06\x8c\xcbN\xe7\xf4\xa7\xbf\xdb\xaf\x17\x8e\x82\xe3\xc8\xbf\xa4\xc7\xe3}\xe49\xd2\xbf\x1e]\x16o\xc8K\xd3\xbf.\x84\x05d\xa0K\xc9\xbf:|\xe4=k\xb8\xb8\xbf\x1c\x8au\xc3~\xa9\x95\xbf\r[\x13f\xe2]\xc4?\xd8\xfc\x95\x18\x88\xb6\xae?\xc6f\xd0:\xaew\xc3?Gv\\\xd0\xa1d\xc3\xbfc\xa2.\xceq\xbe\xa8\xbf\xa4\xfe\x0c\xb4\x05\xad\xa1?f\x8ek[\x17\'\x83\xbf\x1d,\xae\xdbu~\xcc\xbf\xd8\x85\x92\xfa\x11s\xd0\xbf\xa2j\xe0\xc5X2\xd7\xbf]\x03N\xb8\xfd\xa5\xc3\xbf~\x96\xb1\x15\xb68\xb5?\xc6(2\x81$\xf8\xe0?\x94\x0e\xd7\x18wd\xb8\xbf\xff\xefc\xd2Ui\xca\xbf\x81\x1f{\x85\xe5\x02\xe5?6\xc7\xe6\xac\xaa$\xb7?\xc9\x89\xaeoO\xc1\xa2\xbf\xea\xd3hjk\xa7\xd7\xbf\x0f6\xb2,]\x1b\xd1\xbf$\xaaV\xba)?\xa2?\xb5Y\xc8\x04(\x16\xca\xbf\xc6\x17Y\x9dXK\xb3\xbfU\x8c\xd7slX\xc8\xbfp\xa0\'\x82*U\xc0\xbf\xab\xcc\xffhX\xdd\xc8\xbf\xd8\xd0l,\xccc\xc2\xbfn\xd1\xa5\xd3m\xa1\xdb\xbf,4\xe2f\x93\xf1\x8b\xbf\xfeL\xd2\x9c\xa2\xc3\xac\xbf\xfbj^\x87>\xbd\xbc\xbfo\xb3"0\x15\xc6\xcd?\xabe\x8f\xb1,\\\xdb?44\xe8\xd7\x88\xb7\xc1\xbf\xfb\xec\xaf\xd7\xc1\x82\xb0\xbffh\x8f\xfe\xe0R\xcc\xbf0\x9d\xa0\xb7\xb0\xf2\xce\xbf\x07\xa6\x93\x1c\x84\xf5\xb5\xbf\x88c\xe1G_\x8e\xda?\xd1G\xadIP\xdc\xa9?U\x99\xc4\xf4C\xab\xd2\xbf\xb9.0A\\^\xbe\xbfYDG\x08oK\xcd\xbf\xf2(Zbe\xca\xd9\xbf\xc2\x0eT\x81\xc5\xb1\xa8?8O\x08Td2\xc2\xbf\x0e\xa4\x91A_\xee\xb7\xbf1(t\nM\xab\xc3\xbf\x05\x94h\xb6\xdb\xbf\xb0?D H\x00\xab\xde\xc4\xbf\xd2\xbb\xc0\xc5\xdd\xde\xbb\xbf\x8c~%\xf9\x0ba\xd5\xbf\xaa\xe7\x10,\x81\xed\xc2\xbf\x02\x92\xc6_t\xee\xd5\xbf\xa4\xf33\x11 :\xc7\xbf\xbb<5w\x17\x87\xd2\xbf3\x00\x96\x07,\xa3\xd3?K\xea\x18\xb5\x06,\xe2?\xccd\xd1\xb8\xf2\x87\xb9\xbf\xb1N\x05{+B\xc2\xbf\x9a\x0b+\x7fE\x1b\xc2\xbf\xadp\x0b]-4\xd1?\xb6N\xdd\xe6\x19Q\xc9\xbf\xd7\x9a\x1d[\x9a\xa6\xc5\xbf\xc1\x8f\x84\xaf\xdf\xeb\xc7\xbf\xa7g&\xbd\xded\x86?m\x19\xf4\xc1"\t\xd6\xbf\xd8\xd5\xf7.\x90\xac\xe2\xbfw\xcd\xe4+{P\\\xbf\x1bu\xbb\xc0\xcb&\xd8\xbf\xdf@\xae\x1d\x89R\xe3\xbfU\x0f\xd0\x98\xd9=\xdb\xbf.\xbfn\xf7\xaa\x9b\xe4\xbf\xcb\xde\xf9\xd0\xaa*\xe7\xbf#\xba\xdb5\xf6\x97\xe0\xbf\x15\x84\x15f\x04\xab\xe0\xbf\x1cK\x82\xb5\x9fk\xb5?\xb78g\xf2\xb9\x1c\xe0\xbf\x1b\xad\x03+B#\xdf\xbf\xd0\xd3\x0b\xd3\xe4_\xea\xbf\xddiGBi\x85\xdd\xbf\x00Hz\x8e\xf2\xd2\xe7\xbfm~=R\xdcw\xd7\xbf\xfb\xb1\xcd\xa7N\x05\xda\xbf\x0eH\x00\xc2\x1a\xd8\xd8\xbf1\xa1n\x03i\xd5\xdb\xbf\\\xbaD\xd3\x16\xb3\xe2\xbf\xf4}\x13z\x9a\x0c\xb3\xbf\xd5\x07\x91*[h\xd4\xbfP\x96\xce_\x8f>\xbf\xbf#=\x07\xcfo\xa7\xe4\xbf\xe7\x93\t\xed\x9bn\xd7\xbf\xa2\xfd\xea\x8e\xc6\xad\xdd\xbf\xce\xf1\x16LA\xb1\xe7\xbf\xbe\xc5/\x1a\x16\x9a\xe4\xbf\xe2GD\x13\xe9\x1c\xe4\xbf\xfd\x9a\x11\x12\xbd\xf0\xe2\xbf\x00\n{\x9f\xa1r\xe3\xbfI\xbbG\xb8\x83\xaa\xcb\xbfL\\\x12\x07\xb5-\xe6\xbfkg\xa6\xe4\t>\xdb\xbf.\x0e\x02\x84[\xb9\xd6\xbfr:\xd2\xb4X\x18\xe2\xbf\x8b\xd9\x90\xe1\xba\xf1\xc3\xbfe\x1aTI\xb3\xa1\xf2\xbf\xc4jj%V\xae\xea\xbf?\x9ar\xcec!\xcf\xbf\xe3\x8d\xd9\xb3B8\xd7\xbf\xff\xfc=V\xb1q\xe0\xbf\xd4\x0b\xc4Z\xa8\x92\xd1?\x13y\xf8\xe2\xad\xa4\xe1\xbf3\xbd\x02\n\xd9>\xe3\xbf\xbf\'\x15\x88\xd6\xff\xdb\xbfN!3\x98\xe4\xea\xe2\xbf\x01\xb1\xd7\xd6l\xfa\xd7\xbf\xb8R#\x80[\\\xd4\xbf\xb6\x95\xc0Q\xe8n\xc5\xbfN\xb8v#5\xda\xd2?\xff1@\x95\xc9\xa4\xb6?\xf4\xf3\xaa\xe8\x88$\xd1\xbfj\xd2-nq\xce\xdd\xbf\xb2hs\x8c%\xba\xe6\xbf\x86]\xc0\x18A\xa2\xe1\xbfDm\x02\x90\xe9"\xda\xbf\xd7\t;X\xea\xaa\xdb\xbf\xbdTq\xb3\x85\xb6\xe1\xbf7I\xd4K\x02\xe4\xe7\xbf\xc0{\x12\x85G\x8f\xd5\xbf\xfa\x02Z\xa0\xc9O\xd0\xbf\xf2g\xfd\'@\x94\xe9\xbf\x16\x03\xdd\xbbeD\xe1\xbf\xac&\xfa\xc0\xaah\xdf\xbf\xda\x87\xca\x92\xf8\xdc\xdf\xbf\x03\x90\x7f{f\x9b\xd7\xbf\xa8lhG\x16_\xee\xbfL\xa7~\xd1\xd1\x82\xd0\xbfV\x83g`\xfd&\xc4\xbf\x1c\x84\x19>\xb94\xeb\xbf\xd8\xa8\x8c\x1d\x0c\x95\xe3\xbf\xf5"\xa0Kq\xd9\xe6\xbf/\xa3\xd2\xae\x14x\xe6\xbfu\x16\xa4\x95i\xe2\xe0\xbf\xd1F.\x13\x0f\x95\xde\xbf"}3\xd4\x15\x98\xda\xbf\x86o\x80E\x89\xa8\xe2\xbf\xfa)\xdec\xcc\n\xe2\xbf\x90?\x83\xf0\xeb\xb0\xe6\xbf\xb1cc\xa65\x9a\xdd\xbf\x04\xd9\x0e\x01w\xeb\xe3\xbf\xaeg\xdb\x82dU\xd8\xbf\x1b\x1f\x99\x91qH\xdf\xbf\xb3\xfa\xc3)1\xe0\xe0\xbf\xa9\x95\xae\xd3\xb6R\xe7\xbf\xed!\xc4<\x04\x00\xec\xbf\xa1\xba\\?\x01\x01\xd7\xbf~\x04V\xd0\xff:\xed?\x7f)\xb7\xf7\xd3\xfb\xe0\xbfs\xa1\xff\xd15\xc5\xd6\xbfh\x84\xa8\xcb]n\xe3\xbf{\xbb\x99\x95D\xac\xdc\xbf\xd3\xde|"\xf1\xdc\xde\xbf\xdb\xb0$j\x89\x91N\xbf\xad\xd1\x9f\x90\n\xf3\xe4\xbf\xedR\x85\xf1\x9e\xc5\xdc\xbf\xf2\xed\xc4\x95\xbb5\xe4\xbf\x92\xb4J\x0c\x95B\xca\xbf\x96\xf0\xb3\xbf\x10v\xe4\xbf\xbf\x11\xe5\x1b\xfa\xda\xd9\xbfz J\xa2\x17\xb1\xa0\xbf\x11\xf2cWgZ\xe5\xbf\xd6I\xc2\x17\xb2\x04\xe2?\t\'-*\xaea\xcc\xbf\\9Y\x9f\x0e\x99\xc4\xbf\xffu\x1bZ\x9d\xe7\xde\xbf/\xa4\xf6R\x10\xc0\xb2\xbf\x9eO\x01\x1e\xcd\xe6\xdf\xbf@#\xf0\xa9f\x9c\xe3\xbf\x7f\xe0P \x95m\xe2\xbfY\xeb(\xad\x8e&\xef\xbf\xa8\xad\xcdP\x1b0\xf0?E\xccw\xf4\xc2\xcc\xe1\xbf\xed\x96\x96\xfd3n\xc6\xbfX/\xe7wo5\xc6\xbf{E\xc2\xf6\xb2/\xf0\xbf "\x06\xc1FA\xcd?&\x1e\x9dgTF\xd6\xbfbj\xc8\x1f\xd3@\xed\xbf\xb0\xac0\xd75\xf5\xe2\xbf\xc4C\r\xcfy&\xe1\xbf\xd7)\x9e\x08!\xaa\xe5?\xe3\x12\x97fI\x04\xdd\xbfo\xfb\xa6\xbfC\xf7\xde\xbf/ }\xe5\x19p\xae?\xfd\xda\xba\xc2|a\xdf\xbf\xd1\xf6RJb\x14\xd7\xbf|0\xa9\x1c&D\xcb\xbf\xbf-\x96Zh\xc2\xcb?2\xdf\xa2\xd1k\x17\xb9\xbf\x0cg\x98\x11\xfd\xdb\xd9\xbf3^|\xbc\x904\xcf\xbf%\x8f\xbc\x15\xfe`\xc9\xbf\xad\x8fp\x9cml\xdd\xbfN\xf8\xc6\xaa\xb9\xef\xc6\xbfv~\xb6\xbcz\xf1\xd2\xbf\x83\tce\x9e\xf7\xa2?\xdf\x80\x12_3\x10\xde\xbf\x1d;\x921\xfa\xb1\xce\xbf8\xb1E\xf5\xe7\xa8\xe6\xbf\xdf2\x15?t\xba\xca\xbfT\xd4\xb0\xf5\t3\xd9\xbf4\x99\x08\x87\xe1p\xce\xbf7s\xf4\xd8.\xf8\xd9\xbfV\xd0z\x81SZ\xd5\xbf\xa3\xaf[\xaan\xdf\xd1\xbf\xe5\xa4\xf7I\x1a%\xce\xbf\xae\x939\x10a\xe5\xa3?v\xc9\xee\xcb\xd5d\xbc\xbfK?M\x9d/\xa5\xc6\xbf\xfbxKo$\x08\xd5\xbf\xdf\xb7\xbc\xb9\xbc\x9b\xc9\xbf\x83\x8f~\x8b\x01p\xc2\xbfS\x1c\x85&\x8f\xa3\xde\xbf\xc3E\xbbi\x1ci\xd9\xbf\xbdQ\xc4\xc2\x0bQ\xd8\xbfy]\x95\xbd\xd7\r\xdb\xbf\x95\x8b\xf3\x0f\x87\\\xe3\xbffJ\x00"y\xe4\xa5?\xc4\xae\xcf\x13\xf1U\xe1\xbfc\x15\xeb\xe5\xf4|\xc5\xbf\r,\xf5S9P\xdb\xbf\xb0\x85\x1c\xd1\xf9\t\xd1\xbf\xb7\tu\x8c\x87k\xc2\xbf9$i\xc2V\x80\xeb\xbf\xcd\xa8lv\xe5=\xdb\xbf\xf1\'\x8f\xb3\xcdO\xd7\xbf8\x05\x86U\xed\xde\xc6\xbfWE\xaf\xd5\xd3\xc3\xd7\xbf2\xf8G}\xfa\xf5\xae\xbf\xb0\x15\xd6p\x05\xbe\xcb\xbfI\xdb\xb2H\xa0\x1b\xd4\xbf\xd7\x1by\x8b1\xfb\xc7\xbf|\xb2\xd4k5%\xdd\xbf,\xed\xe5Z\rd\xd0\xbf\x9e,@\xdf\xca\xb7\xdf\xbf\xa1j\xce z\xf7\xd2?x\xab/\xc6\xe5\n\xc0?\x0c\xd0\x8c\xaaa\x99\xd3?\xc9\xe5v\xf4a\xa3\xdc\xbf\xd3#\xe50\\\xfe\xc0\xbf8\xb7s\r\xa0\xc4\xde\xbf<\xf1&\x08yI\xcd\xbfH\x93r-\xf9\xcb\xd8\xbf\xfc\x86b~\x80\xd7\xb4\xbf\xff^_\x06>\x9d\xcd\xbf\xef-\xc65\xe9\xee\xe2\xbfq\xe4T\xeb\x9d\xb7\xa7\xbf,hU\x85\xe9\xb1\x97\xbf\xf8\xdc\xa7\xa1\xde\x92\xe0\xbfJ\xb7(0\xdcZ\xd0\xbf\x8d\x1b\xc5C\x0bK\xb7\xbf7\x05~\xf4\x0f\xac\xce\xbf\xc7}\xba\xab\x1f\xc6\xc4\xbf.\x1bM\xb9\xb5\xc0\xe5\xbf\xcc\xd6\xb0\xf0>j\xd0\xbf\xc0\x83\xdccnv\xb8?\x14d\xfb!\xce\xe0\xd2\xbf\x89\x84\xe8\x15ml\xcd\xbfE\'5Uq\xd2\xdc\xbf\xcbi%(\x8c\xe3\xd5\xbf\xdeb\x90>&\x8c\xcf\xbf\xe0\xa8!\xe6 \xed\xce\xbf\xe4\x8e\xc8\xe2P\xcb\xda\xbfV\x18Jg\xf2\xa6\xd7\xbf\xe2o\xda\x0b\xd3v\xd8\xbf\\ \xf6\xa2\xca\xbf\xca\xbf\x7fdM\x88]k\xd9\xbfuQ=\x93\xeb\x18\xdd\xbfi\xff\xa9\x13\xeb9\xc5\xbf\x84x7\x13(\x9f\xcd\xbf;\x96\x07\x0eU\xe7\xc0\xbf\xf9\x0c\xc4\x96\xa86\xd6\xbf\xf3\x16}\x90\xd3>\xdf\xbfR\xd3 \x06L!\xcd\xbf\xb2\xf5\xf4\x11\x9a\xbd\xe5?\x8dl6\x9f\x8dJ\xcc\xbf\xfb,Nt\xd6\xf5\xb9\xbf\xb3O\xc8\xf10\xda\xbb?\xa0~\x17\xe7\xf6\x1c\xd5\xbf\xcfc\x96G8\x19\xc6\xbfB\x9a!\x9dS\xf8\xbf\xbf\xe8\t\xde>[N\xd9\xbf_1\x15\xa3\xb3\xb0\xb7\xbf\x1397\xc5\x9a\xb6\xd3\xbfaoO\xbda\x8a\xc8\xbf\x8a\xb5\xd8.#\xc2\xd8\xbfP\xb3\xc7\\\x97\xb6\xc8\xbf\xc7\xa7H8\x1c\n\x90?\xa6\xab\xa4\xd5gC\xdc\xbfF\xee#\xed\xb6\xbb\xd8?\xfa\xb0\xbd\xaa\xfb%\xb2?\x88a\xa6\x80bE\xc1\xbf\x07\xf4A\xcco\xc3\xbe\xbf*\x1eE\xeb\xb9\xcb\xca\xbf\x16\x06\x7f-~\xf8\xb5\xbfr\x06\x9c\x83\xb0\xbb\xd5\xbfl\xb7\x94\x89\x04\xa3\xc6\xbf\xeeU\xe3\xad\n\x17\xe9\xbf\xcd\x90\x1d}\xb7\x98\xe8?X\xa2\xc47\xba\x00\xd2\xbf\xb9\xd9\xfb\x08\xf2c\xd4?\xd7\x9a%\xf1+3Z?tIM\xa6\xe7\xd8\xe2\xbfh+\xa3\xe9\x88\xe0\xdd?\x81\xd8\xf5g\xb0\xb1\xb6\xbf9\x8f\xbb\xf7&\xf2\xe4\xbf\x8d\xb4\xacO\x9b\x92\xd2\xbfg\x9aR\xa5\xe1N\xd3\xbf\xf0\xd6e\xfdzE\xd2?\xb3\xd1\xa4\xad\x81\x1f\xc2\xbf\x9a\x98\x15\xa4l\xdc\xbb\xbf\xc3\xd8\xc28;\x0b\xa3?\x9f\xb5\xf5@\x16-\xd0\xbf\xc9Q\x06j\xbd\xce\xc7?\xfc\xb0\xef\xd6\xd7;\xb3?\xce;\x17g\xf8i\xc3?O\x12\xaf\xb7q\xac\xc6?\xd8\xd9W$-\x16\xad?t\xdeR\xee\xe1\t\xc4?i\x0e\xb9\x85"&\xce\xbf\x9f\xba\xdb8\x83\x8b\xbd\xbf\xf4\xf6\x9b\x08\xf0\xdc\xc8?\xb96U\xbd\xa5\xc7\xa5?\xb1\xd6\x0f\xe0u\xa7\xe7?\xcf&\xbdI\xc0\x8d\x9d?f\r\xd9\x86\x08\xdc\xb3?\xc0\xa2z\xfc\x90\x01\xd0\xbf\xf2\xa5\x8e}X\xe7\xd3?jT\x98%\xec\x0b\xb6\xbf\xc9\x94}^\x85\x05\xc4?">\x8f\xd7\xa2\x87\xc5?\xed\xf2d\xb1\xd9K\xca?\x15sN\xec\x1a\xc6\xce?i\x1f\x86uw\x96\xa8\xbf\x16B\xf0\xf8+\xc1\xd1?M\xe5\x04\x99\xec\xfd\xba?\xe3\x80\x07l\xe3\xf5\xd7?\x98\xda\x9a\x17_\xf7\xa3\xbf\x9eT&?\x19\x8a\xca?\xb3\x92\xa3\x1d\x90 \x9d?N\xe0;+\xc5E\xdd\xbf\xdb\xaa`l\x88~\xd7\xbf\xc1Q{R\x05\x84\xcb?T-L\xe8sM\xb1?"\x9c\xa8\x80\xa1M\xd4\xbf\xd7!\xd4\x88\xeaE\xcf?\xcb\xb8EQ\xf5h\x88?\xb0\x01O\x9d\x862\x8d\xbf*\xea\xdfM\xf6\xa1\xbe?\x8c\xfc\xe7\xbfl\'\xbd?O09\x17\xbd\xc9\xe3?\xf1\x16EuG\x8c\xe8\xbf\xb1Y\\\xc9\xea\xa5\xe2\xbf\x920\x94=\xb3\xd7\xcf?\x80\xcfs\xac0\x80\xd9?\x85\xfe\xb9D\x02k\xbc?\x92\x98\x05\' \xc0\xec?\xdb~\xac\xc1\xef\xbe\xcf?\xb3\xeb\x87\xa7\x91\xab\x89?\x9b\xe6J\xfb%k\xd5?f\x04\xb7"\n1\xa0?\xa6\x04k\xb9D\x8e\xd5?\xf9\xed@\xbc\xea\xe2\xd3\xbf&\xf9\xd7@"\xec\xb1\xbf\xb4\xbad\xee\xe7K\xbd?d\x1e\xec7\x95B\xa5?\xd8\x8f "\x1d9\xde\xbf\xf61\xe6\xce\x7f\xad\x8b\xbfXE-\xa8\x95%\x9a\xbf3\x01v\x1d\xd9!\xb4?\xda\x1b\xbb\xcc\x91\x84\xd4?\x11\xee6\t\xd5\xd1\xbf?\xc3\xb3\xb8\xd9\x85\\\xb7\xbf\xe9\x87\xf9\xd0%\xcd\xe0\xbfo\xf5\xe5\xbd\t#\xda?\xacR\xf2\xbe\xbd\xbf\xda?\xa2\x9cf\xc9x\x80\xbf?\xeb\x12\xbe\x88\t\x9c\xd4?\xb8\xf1\xa1=\xd1!\x9e\xbfC7\xccd\xf5\xd0\xd0?m\xeb\xe3\xf3\xdcJ\xa0\xbf\xe2\x05\xec\xef\xabb\xd3\xbf\xd3-\x0b9\r+\xc3\xbf\x04i\xdb\xc8\xce\xb3\xda?\x03Zi\xfc\x12\x9f\xd3\xbf\xaf\x8eQ\xbd7\x00\xce\xbf\xb5nOk>>\xb0?\x99&qis\x9b\xe1\xbf\xbc\x88:\x0f\xac\xa4\xd0\xbf\xdaw\x07\x8b\xd5\xcc\xc0?\t}\xc82\x0eE\xc3\xbf\xb4\n\xc0vo\xa2\xce?5]f\xa7\x89\x0e\xd1?7\xefYE\xae\xe5\xc6\xbf\xd8\xc45J\xb6d\xce?/\x8d\xcdxp:\xb9?\xfd\xab\x9ce\xc4\x90\xd3?\xee\xb2\x89\xa6,T\xba\xbf\x0f\xef\xe4\xca\xf9\x13\xbf?\x14\xeaI\xd7\xb3\xea\xc1\xbfy&\xfd\xa2\xfd\xed\xd9\xbf6\x1b\x93\xfbC+\xc7?\xc5\xcd\xdczr\xc5\xf5?UX1o\xf1M\xb0?J\xa1\xbd\xd6\xe1a\xc7\xbf\x8a\x17<\xf9\x8e\x06\xe1\xbf\x80\x92\xe3\x14\xde\xcc\x92?/\x7f\xde\x03\xc5\xbe\xd5\xbf\xde\x1cH\xd9\xcb\\\xe4?\xb54b\xbc\x9b\xd6\xb3\xbfhq\x9d\x13\xd2\xea\xc0?rX:\xa1(z\xb0\xbf(u \x97\xa7\xaf\xd8?\xd1\xbf_\x90\x82\xdf\xda\xbf:\xc0,\xd2\xdd\xb3\xcc?\xf4\x02\xdf#2\xef\xdb?\xff)u\xa8\xd0\x7f\xab?\xef\xaf\xd6YR\x92\xea?\x86\x99\x14\\\xb47\xc9?>\x96g\xd7 \x07\xd7?y\xba\x1b\x83\xfc\xbc\xad\xbf{\xf4\xef&\xe2\xd4\xe0?\x9d\x1c\xf8\x1d R\xa6\xbf\xc9Y\x9d\xe3.\xf4\xc6?\x97g\x16@2\xb1\xc2\xbfBP\x836\x04\xfb\xe1\xbf\xb9\xe5\x95\x10\xef\xe9\xf2?K\xdeS\xcb;\x8e\xa5?$\x01\xcbIo=\xca?*\xc8#\xee\xc21\xd9?\nK\xd7\xf9\x19\x10\xe2\xbf\x06\xd4+\x85;4\xd0?%\xc0\x984\x84\x13\xd9\xbf{\xd6\xc5z\x86\x95\xe4\xbf\xd1vz\x11\xf7d\xcf\xbf\xe3\x86\xa4\xdcJ\xc5\xc8?* \x94\x04\xb8\xdc\xb1?\x99SL\x89\xae\xc9\xcd?q\xff\xf3\x86\n\xa6\xa1\xbf\x87^\x0c\xf6\xc19\xe6?:\xfa\xd9\x0b\xdd\xac\xa4?\xd7\xb7GS\xf6Q\xc0?\x85;\x9b\xf4\x0b\x9d\xcd\xbf\xb6 \x0b\x8a\xb6\x9e\xe3\xbf\xa9e\x96\xf8\xb1\x11\xdd\xbf\xcf\xb1\xb8\xa8\xe3\xeb\xa7\xbf\x13\xd2\xcfVf\xb2\xb6?CO\x1e\xa4\xa4\xb8\xe3\xbf\xaa1<Z\xef\xd6\xcd?ft\xd6\x0f\x81\xcb\xc2\xbfjiL\x93\xcf\xf9\xbd\xbf\x9b\xdb\xbc\x9ex(\xd6\xbf\xab7`^\x87\xd2\xd8?;\xd3\x95\xd4MR\xdf\xbf\xcc\np\r\x19\x88\xce\xbfv\xb5\x15\xbf\xe6k\xd6\xbf\xfd\xacw#X\x99\x97?L\xdb\xee\xad\xe6\x97\x85\xbf\xb08\x9f64}\xce?\xe7V\xe6\xc6\xed \xc4?W\xd7\n3\xecl\xca?\x05\xec\xe2Am\xe0\xca\xbfj/\x13A\xa4Y\x8d?z\x1a\x8d\x97\xe5o\xe4\xbf\x9d\xfb\x06\xbbN\x11\xdb?\x1f\x02\xa7@{\x95\xc3?Zs\xa8Y\x9e\xb1\xda\xbf\x05\xdd-\x16e\x9c\xe4\xbf\x07d\x99\xf7\xb0k\xd3\xbfI\x08\x9bD\xfe\r\xc2\xbf)#\x91=\xc4\x13w?\xc5>\xb6j\xae\x88\xd1?\xb7\xc0\xdf\x13\xeeL\x9f\xbf\xfb&M\xc2\x00\xac\xdd\xbfS\'\xda\xd8fI\xc3?\x91\xdc\xd3\x96\xf1q\xe3\xbfV\xae\xd8\xe2\xa1y\xd4\xbf\xe6\xb8\xfd\xa3\xdb/\xd6\xbfX\xa6wk@\x06\x95?\xefiyx=\xbf\xc4?\xc4F\xbc\x0b\x9b\x1e\xcb\xbf\x16\x17\x0f\x91\xb4J\xda?\xc5\xf6\xd9f\x9fB\xd3\xbf\xedm\xdf\x8c\xd6\x19\xc1\xbf\x12rC\xa5\x0c\x17\xc3\xbf\xddv3\xbf\x19R\xbd\xbf\xbbD\xa4\x85\x8f\xf5\xd6\xbf\x16\x84\x8c\xa4S!\xd4\xbf\xb7\x00|!\x1d_\xc1\xbf\xf4\x8a\x91O\x8b\x14\xcb\xbf\t\x89\xc8%\x80\x03\xcf\xbfB\x91\xccV{\x9f\xdc?g%\xc9\xbc\xc0K\xe9?m*\x96\xe3\xa6\xd1\x9a??\xd7B\xc9\xda\xe6\xdd?4J\xe5\xd3\xb7\xce\xe5\xbf\xc9~\xc4\x87E\xb3\x9e\xbf\xba\xb4x\x9c\x9eT\xd4\xbf\xc1\xc1Ab\t\x0b\xd0\xbf\xc4t\x0e\xd0\x90\'\xdc\xbfw\xefx\xaa\'\xf9\xdf\xbf\xb9\xcd\xa0=\x15,\xb5\xbf\x91\x85\xa6G\x15\x82\xca\xbf\'/\xf9\xfe4X\xb2\xbfxAK%\x04\x83\xa1?mn\x817\x10\x8b\xb1?\xb01.6s\x8a\xe4\xbf\x9c\xa5\xd3\xcc\x08\x08\xa9\xbf7\xf8\xa3\x88\xab\x86\xe2\xbf>v.\xbc\xe9\xfc\xb5?\xf4\xb6\nX\xcfE\xc9?\xe2Hh\xe4\x12\xd4\xdf\xbf\xc97\xd1\xf7T|\xcf\xbfR\xbd\xf4\x13\n\x92\xe2\xbfz\x1e\x98d\xdd\xbf\xc9?L\xf3\x115n\xaa\xca?B\xf0Q\xd6\x93\x89\xdd\xbf\x84\\\xfd\xec*\xb4\xb9\xbf\x0cU\x8a\x8c7;\xe5?\x91\x19T\xc9yn\xb0?-BF\xe9\xe3b\xc7\xbf\x99ZR!\x0e\xa6\xc7\xbf>\x0c\xa5\xe7bQ\xe1\xbfi\x10A\xe9f+\xb5?\x93\x13"\xe8\xc7\xb8\xd2\xbf\xe3\x03_\xa5\xa1\xe3\xdf\xbf\xb7\xbf\xd18\xad\x15\xe2\xbfI\xd7\xb1\x03SA\xd5\xbf\xcf[\xac\xbb\x8d[\xd5\xbf\xe0\x12;H>\x13\xb8\xbf\x99u\x90v/1\xe0\xbf\xcb \xe2\xa0G\x7f\xd0\xbf\xfczFn\xd7\x1a\xdd\xbf\x1a&\x17\xc47\x8a\xbb\xbf\x94D\x93\x9d\xa0\xd8\xe0?\x8dI\xa9o\xf8o\xb3?\xce\x1a\x03\xd5<G\xe0\xbf\x07c\xf9\x12\xd75\xc1\xbf\xbe\t\x9e\xba\xa9\x1c\xe4\xbf\x95\xe6\xb80\xe4\x0c\xdf\xbf\xe4\xde\x85\x8a\x88\xe5\xbf?\x15\xe0\x83\xefi\xd5\xc0\xbf\xf2m\x15 \x00\xd3\xa0?\xc1""\xda\xf8\x88\xdf\xbf\x14\xa4\x97tpR\xb1\xbf\\\nL\xd4U\xe9\xdf\xbfLE\xb1K\xc1\xa7\xd2\xbfK\xdb\x87\xb5\x97\x8a\xa1?Y}x\xa3\xe26\xe5\xbf\xa6\xfd1\xd2\xc8\xb9\xd9\xbf\xff3B\x04$\x0f\xe4\xbf\xe6ZItn\x85\xc9\xbfA\x1d;\xed)d\xe1\xbf)\xea\x1e\xa7\xa5\xe0\x8d?\x8d\xcd\rn\xb5\n\xe0\xbf\xad\x96\xc7\x84\xf3/\xd7\xbf\x88\xc7)V\x13p\xd1\xbf\xd4\x007\xc37\xa2\xb1\xbf\x8d\xbf\x83\xecN\xf6\xb7\xbf\x11h\x10\xc5p\xd5\x8f\xbf\x9a\x90\xd9\xe49\xeb\xe3?\x0b\r:\\\xc1\xfe\xac?U`\xce\xef\x16\xda\xda\xbf)\xd9\x01\x12\xf7\xd6\xd2\xbf\xdd\x05\xdd\xfe\x8d\x03\xbb?\xb0\xadE\xa8\xabC\xd8\xbf\x0c\x89\xd3\xb9G\xe6\xe3\xbf\xc8\x8e\x8b1\xbb\x99\xa5\xbf?)\x88\x06\x8d\x13\xdb\xbf\xde\x85\xb2\xefs\x9d\xda\xbf\xcb\xa8%=\xd9t\xe5?\xf4\xc9\xd4\x9d(\xde\xf3?eD\x01\xd4T\x1c\xe7?e\xb8\x05\xa0\x9b\xf5\xe1?\xd7%\xcc/\xb7\xb1\xd1?n\x89[\x12\xf2\x82\xf3?\xa7\x96\x8b\x8d\x8c<\xc9?U\x103^\x9a\x99\xda?~NR\x99\xa3\n\xe0?\x96\xaa\xa3IT%\x8d?\xf5\x81\x7f\x98\xe5\x89\xc4\xbf[\xefr\xe1}}\xe7?\n@Dv\x80\x1b\xc2?u\x10seA\x98\xde?\r\x1b\x14am\x00\xd8?\xf4\x93\x04w\x84\x8e\xd8?\xc8\xa6\xc5[\xe6g\xc8?\xbe\x1dr\x12S\xf9{\xbf\x06\xe0\x86\xa5x\xbf\xce\xbf\x9dd+;\xf8W\xe2?\xd3\xa8\xf4\xfcz\x85\xd3?n\x81\xf6\xf6\xb7\xce\xed?\x0c\x05[p\xfcU\xe0\xbf\x0cM\xabW\x81\x8a\xde?\xec\x19*\'\xdc\x83\xe7?\xfe@\x1a~\xf4\xd8\xf1?\x8e\xc2\xfe\x19\xeb\xa4\xe1?\xab\xde0$\xf4\x91\xf1?bh\x9cr\xab\t\xc0?\xe3\xba\xc7(\xcc\xf6\xb2?.V\xef\x1bS\x9c\xbc\xbf\xd0\xf2\xd4:\x8c\x1e\xe8?\xabrUL\x11\xd8\xd1?\x01\x8a\x1a\x89\xe5\xb2\xed?c\xd5\x92\xdc:\xb3\xe1?,\xbd\xc54;\xb2\xe6?O(\x93\xad\xba\xb8\xd1\xbf\xa0\xae\x80j\xdf\x80\xa0?\x05\xdf\x11\n\xdf\xda\xa2?b;-Z\xa4\xd0\xe5\xbf(U\xc7\x1d\xe8\xc5\xd1?\xa5\xc9p<\x87\xec\xdf?1\xa7F\xa7Q\xb7\xd1\xbf\xd0\x026\xbeo\x96\xc5?\xbb>jIQ\xd0\xe9?\x1b\n.\x1c\xd7U\xd0?\xcfe\x7f\x89\xd2\xde\xdf?\x97\x7f{\xe7\xa9\x98\xe0?\xc9\'\xf7Y\xe7!\xe3?\xeb\xca\xba\xbd>\xe4\x9b?\x8c+\x0fKH\n\xe5\xbf|E8\x00\x97W\xe7?\xf2\xd8\xeea\xd4\xa7\xdc?+\x06\xdb\xdf\x1c\x1b\xf2?\x96I\xc4o\xbeF\xd0?}x\x8da\x08\xcf\xe6?\xdamq\xcdq\x8a\xc8?{a\x83$H\x9f\xe6?x~\xdc\x89eE\xee?\xf8S\xc7\x8a\x1d\xbf\xc1\xbf\xac\x7fT\x07\x9eG\xd5?Lj|q\xce\xf2\xc6?l\x02\x84AY\x13\xb0\xbfd.\x04;\xe3\xf3\xb2\xbfTI\x0bqt)\xf2?lsW\x86\xec\x80\xc5?\xf8C\xa0\xa3\x1c\xc9\xec?&\xf7\xf9\x1bQ\xc1\xd7\xbf\xc6B\x1a42\xb8\xd1\xbf\xedv\x8d\xcfS\xbf\xed?\x8a\x05\x89>t\xca\xd2?\xcd\xea\xec8\x928\xf6?m\xff\xd9\x0f\x9b/\x8f\xbfHX\xdf\x81\x8cw\xe0?\xb1\\\xcc\xb7\xf32\xf4?\x94^\x05\xe0mB\xe0?HW\xedB\xf3\xc9\xc7\xbf\xa7\xe5L&fJ\xb3\xbf\x8d\xb4\xa2T\x1cn\xd5?E\xb6\x05H\xdbd\xcd?\xf8\xc3\xf7>\xdfq\xe6?\x83+\xafp\x9b\xc6\xc1\xbf\xdb\x7f \xa3a\xba\xd1?9q\x13\xf9\x90\xc2\xf4?\xc9^K\xff\xbe/\xea?Ps\x93\xf8\xd5\x87\xe9?9\xc6\xc2\xa7(\x08\xda?\x8f\x17&W1!\xe2?\xbc\xaf)\xb8\xdb\xca\xe0?\xcb\xa4\xf5CR\xaa\xe8?\x02\xe7\xc3g\x0c\xf6\xf5?D\xb7\xb7r6<\xcd\xbf\xc8\xff\x98\x9e\xb7\xfd\xd4\xbf\xf2\x03k\x9a\xa5\x96\xe5?\x95\xbb\x14\xa1\xc1\xb9\xe6?$l\x86\xf0\x86M\xea?\x06\x93e\xd1\xdc\x89\xef?\x0f/\x12\x9aE\x99\xec?-\xaa\xea\r\xde\\\xd2\xbf\x92\x13\xd9r\x99\x82\xe3?\xd1}P\x80n`\xbf?\xcd\xdc\xf8N\xf9e\xe8?\r\x9e\xec[\xab\x05\xd9?\x19\xed\xde\xf6q\xac\xe9?\xda\xe2"R\x7f\xff\xb0?\xa0\xe3u_4\xee\xc6?\xdf\r\xee\xec\xae\x93\xf2?\xcd\x9a\xfc\x10/\x85\xe6?\x07!Z\xe4:\x9e\xf1?\xe8\xb0+\x99\x8b\xfb\xdd?J\reo{z\xf4?R\xfe\xa9\x10\\\x0e\xb3\xbf\x9d\xf1D\x1c\x00d\xe4?\xa0\xe1\xe0\x15]_\xeb??\x96H\xd3\x14\xe1\xc4?\xf6\xaf:2\xca\xfe\xdd?pb\xcc\x1c\xe7\xf1\xbc?gZV\x7f\x89\xa0\xe2?}\xd37C\xc9\x90\xb4\xbfa)g\xcf\x16\xc3\xc1\xbfo\xd8\x81\xda\x95\x8d\xf3?\x8c\xaf\xa5`\x18\x11\xdf?o\x81 \xd6t\x83\xc4\xbf\x9e\xa0\x1d=(\xaa\xe5?`\xff5XW\xb2\xf1?\x94\xe6\xdc\xee\xe0\x1c\xb2\xbf\xb1\x7fg2\xecd\xe9?\x1cuY\xd3mV\x93\xbf\x87|i\xbd\x19]\xd2?W\xfd$\xf8\x1aR\x98\xbf}\xc2H\xd0\xa1\xa3\xe0?\x16\xa4P\x16\xdfQ\xdd?\xc3\x05\xf5\xb6\xbe:\xc9?<$2\x9dAk\xd1?k\x97\xa5\xb1|\xa9\xd0?\nF\x89\xc5\x86\x94\xd2?\xbe\xef\xf4Ug\xb5\xd4?\x16\xdb\xb4r\x02\x05\xd0?\x11\x1e\xc5\x86\x05]\xd0?]!8Krc\xdd?\x16D`+*\x88\xc2?M<p\x803{\xd6?Ug\xd4l\x8a\xf7\xce?\x87C\xa1\xa5\xf1L\xcf? \x18\xc5\xd8#\xc3\xd5?{buh\x82\xe8\xc6?\x7f\x0cS7\x9a\x0b\xc2?\xaeo\x9c\xcfv\xd1\xd5?]\xc7\xb6:\x86\x0b\xcf?G\xae\\p\x1e\x94\xc6?\xce^\x9c\x16\x93\xaf\xb1?,\x82\x1a\x9b\xee\x0c\xd2?\xacV&\xed@\t\xd9?D}\xf6\xb5\xa0`\xd4?\xc8\xc3P\x8fK\xdc\xbe?\xe6\x7fO\xb5\xd6\xf9\xd7?\xd3\xb6*\x15\xff\xbe\xda?\xd3l\x14i%{\xdb?\x13\xfb\x1e\x82Xs\xb9\xbf\x85<\xd5\x8b\x194\xd9?\xa2\x0f\x92y.\xa5\xd5?\\\xf9n\xf4!\x0f\xca?uGi\xfb\xca\x8d\xbd\xbf:\xdaM$\xabN\xde?\x12\xbdL7m\xaa\xcb?A\xb5\x8b\xff\xbfS\xca?\xc8\xfe\xfeb\xcf \xe0?\'R\xe5(\t=f\xbfoV[\xde\xed\x13\xd1?I/\xb2h\x193\xdb?\x12 v\xaa\xd6\xb0\xb0\xbf\xf3m\x00\xc7S\xa0\xd4?D\xcc\xea\xd2\x9f\xd9\xd6?\x89\xccyZ\x88H\xd3?BT\xf6\xc0\x04\xbe\xdc?\xe7\x8b\x1ey\x87\x17\xd7?\xea\xe4l\xbf\xe3\x0b\xb1\xbf\x8141}\xef\x18\xb1\xbf\xbe3\x02\x913\n\xce\xbfbD\xe9.\xd9\r\xb2?T\xfe\xe2)T9\xb3\xbfJ\xee\xd5t\x81\x92\xd1?}X\xa2:\x8d\x1e\xc7?0\x90\xfd\x18\x8aF\xd9?T\xf0\xc2\x10W\x17\xc2?\xf8ru\r\xa8\xf4\xdb?\x8aQT\x9a\xb7\xe7\xd5?\x9f[ \xe4E\xb1\xba?\xa5\x0b\xc3)r\xab\xd9?\xc1\x7fy\x05.\x8d\xd4?\x9b\xd9\x83a\x90\x92\xd3?\x80\xad/"Pd\xd3?\x98\xb2|a*\xf0\xd3? 4\xc8\x9eI\x0b\xd1?3\xc6\xa8V\x92N\xbe?a\xb5\xfbn\x97A\xd7?\xb8a\xd9o\rp\x9f?4\xfa4\xff\x02\x01\xd6?j1\xb4\x8c\x1c\x13\xe2?\xd0x+\x98\xf4\x03\xd3?\xd6{.[\xec\x12\xd5?2\x89\x86\xde\xc2\x9e\xad?\xe1r\xde%\xf9o\xd2?H\xd5\x80\xd2\x8d!\xde?e\xderR\xe2\x8b\xce\xbfq4\x0c\xbbG\x02\xcb?\xe9Ao*kQ\xd0?9Y\xf8\xea\xa8H\xe0?\xe1Z\xf3\x08\x97\xc7\xbb?"\xe7\xcdo\xd8y\xc3?\xd1\xf2\x1a\x17\x07W\xcc?\xf4\xa1\xdf\xae\x8c\x11\xd5?\x8d\x02R.n\x05\xd4?ii\xa3\x18\xc4\xc5\xd9?Q\xd8\x1f\x0bC\xf7\xd8?\xd9\xfb7}FU\xde?\xb1\xaf\x15\x07\xdc/\xbf\xbf\xaacD\xf77o\xd6?\x96Hp5\x89\xbe\xa9?ddw\x84\xa0d\xd9?\x04b3^\x1aT\xb3?\x85k\xf1\xf4\x97\n\xc1?\xa8T\xde\xf6\x17\xd0\xc2\xbf\xe0\xc7\x1a\x07\x9b$\xd9?\xd6E\x0b\xd7\xf03\xd3?\xbc\x9cC\x95kn\xd1?\x82\x15\x9c\x9d8\x8b\xc8?\xdb\xa17:\xb7\xa1~?\xbc\x04\xb6>\xfd#\xd8?\xeex*b\xaf\x8a\xd4?\xce\x02bI\x959\xd8?>D\x02\x98\xd3&\xb7?\xc5\xed\xa0\x06\xf2\xf9\xe1?\xd4\xf9I\xf8\xc5a\xdb?1\x96f\xf9\xe7\xe2\xcc?aJ"\xd3?\x02\xc9\xbf\xb3\xd7@I\xa8\xb5\xd1?I\xbag^\x01\xca\xd9?-\xd5\xe9\xdbzc\xd4?"\xe2\x8c\x9e\xdb\x00\xd1?\xd9\x98\xd9K\xc1\xdc\xa7\xbf\x91Q\x94ul2\xda?\xa5t\xad\xc3\xc0\x98\xde?\x00D\xeb01+\xda?T\xa1\xd2\xc3aU\xdb?`\xd5\x110\x08\xca\x8c\xbf"G\xf3\x86A\xb1\xb1\xbf\xab \x99\xe5aV\xc6?\xf0\x06umk\x89\xda?{\xdd\x12Y\x00\xd1\xd0?\xa1\x16p-\x86d\xaa\xbf\xc1\xcfv\xfb\xb6\x18\xd3?3\xdc\xfe8mg\xd1?\xbf\x1d\xa6\x9c\x19\x99\xd0?i\xdd\xd1\xb2\x03\x9d\xcd?\xc1\xc7Mx\x90\xf5\xe4\xbfW\xe8\xe3\x84\xe2\xae\xd0?X\xb8\x90\x89Pq\xf0?\x1d\xc2@rwQ\xe0?\x08o\xc9\xb0\xe1\xbd\x8b?LB\x9b\x8fy\xe4\xc7\xbf\xc3\xf0\xacI\x83\xea\xf2?tq\xda+\xb3\xe4\xcf\xbf\x81\xcb\xde\x16T\x98\xb2?\xce\xf2!\xfc\xa6\xa3\xb2?\x02p\x8e\xd5\xc2\x98\xdb\xbf\x9c@v\x898x\xe7\xbfgFY\xa7Y\x1f\xe3?\xc8\x06\xf0|\xcdQ\x9f?\xec\xc0\xa2"\x0fv\xba?$\x8b\x9b\x8d\xe2\xcd\xb9\xbfu\n\xa3_^\xe9\xb7\xbf\'I1\xf5\xe6\x9c\xdb\xbfH\x11|T\x9e\xbd\xe1\xbf\x18\x97]e\xef"\xe1\xbf\xbe$\xbe\x98\xa6\xa5\xdd?\x0b\xa3 *\'\x18\xc1\xbfZ\xfd\x8fc\xb4\x1a\xe7?\x1c\x88\x11\xd2\xaf:\xef\xbf\x89\x93\xed\x13 \x07l?l(D\xc1\xa9\x90\xdc?PKZF\xe9\xe9\xef?\xe4\x0c\xae\xf90\xe9\xe6?J\xb5\xbe\x8d=\x12\xe5?\x85\xf4\xfbW\xa3\x0f\xd4\xbf\xc5W\xfdX\xces\xe0\xbf\xa7.F\xc8 \xea\xce\xbf\xf3647\xbbU\xe2?N\xe3\x0b7U\x9c\xca\xbfS\x8b\xf8\xc5l\x92\xe7?\x9e3V\xa9mD\xd1?g\n`\n3\x96\xd3?\xfb+\xae\x7f\xb2\x00\xe6\xbf\x16g\xdf\x15\x1f\xe2\xca\xbf\xe7UB GS\xc5?g\r\xab\xaa7\x0f\xee\xbf\xee#q:\x01\xf1\xb7\xbfW\x1a\x91\x93\xc6\x7f\x8c\xbf\x9dzh\x03\xac\xd0\xe2\xbf\xdb\xc7l\xdc\xb6/\xcf\xbf\xb8\xaaO`_\x96\xe0?\xcfo\xfc\xc3f\x8b\x8b\xbfH\xbd\x92\x1b]\x96i\xbf)\xd8\xbe\x19\xc2K\xb6?\xeb\xb2\x13\xb7I\x82\xe0?\xa0\x06\x03)]\xcf\xb0\xbf\r\xbcU\x93\xccl\xeb\xbf\x93\x05\xfc\xeeA\xe1\xd7?\xa4\x14Y\x95\x11\x1a\x9a?\x160"$;j\xf1?\x10\xe7\xc2%\xd4p\xce\xbf\'\x02\x1fp\x14{\xe2?\x11\xd6\xc4\x0cn\xba\x91?\xfbu\xd7CZ\xb5\xe2?\xb3\xe9K\xc6p\xa8\xea?\xcf\xb2c\x8c,\xe0\xc2\xbf\xc5/\xebi\x00&\x9f\xbf1|\xff\xf5n\xcf\xce\xbf\x93\xcf\x90V\xb1I\xe0\xbfR\xab\xba/\x8c\xe6\xe0\xbf\xd4\xbf\xbcJy\x01\xf1?j\x1d\xfb\x0eg\xfb\xcb\xbf\xeb\x9c(1\xae\x81\xe6?\xf7ZB\x08^b\xe5\xbf\x99\xcf\xc8=\x93\x88\x8a\xbf\t\xd8\x81\xcd\x9a\xa9\xe7?\xf6\x02\xa65\xb9\xe1\xd7?\x08\x86\x1d\xd9\xa8\xbd\xf4?\xfd\x1a|\xb4\xa4\xc3\xe0\xbf\xa4z^\x10\xd7\xf0\xd5?\x04\x1c\r\xe6\xef\xcd\xf0?R!\xa2=K\xdb\xb0?\x8f|\x07\x15\xaa}\xe2\xbf_\x9a8\xd7i^\xe0\xbf\xf4\x86@\xcc\x1e!\xc8\xbf\xc6[\x08\x02\x1b\x1d\xd2?\xa3{\x0b\xcf*!\xde?z\x1f\xcb>\xb1\x1a\xe3\xbf$m\xb8\xe6\xa39\xab\xbf\x01Z\xa1\xf9\x94\xcf\xf0?\\T\xaa\xa5\xda\xaf\xe5?\xf1\x8e\x8b\xbe2\xd6\xe4?\xbc\xb2\x92\xdf\x8c\xe1\xdd?\xf8\xeb\x0e\xca\xb3\x92\xaf?\xafN\xb75\x85\xe3\xd6?!`q\x07j\x0b\xdb?t\xc2EB\xe10\xf3?\xdbm\xae\x0b\xc0\xfb\xc5?fD\xdfUD\x00\xea\xbfS\xa7\x99\x1cl\xd0\xda??\xf6\xaa\xf5\xb8#\xd9?\xd8\xfaR\xe2\xc1[\xd8?l\x99`\xf4\xd5F\xeb?\xe4p\x97\x19it\xe7?\xb1\xd2\xb9<;!\xe3\xbf\xe4\x02\x7fG\xac\t\xd8?\xd47~\x81\x8a-\xd3\xbfQcR\xa3\x0f\xb1\xdd?\x93\xfa)\x06>\xc2\xb6\xbfk:\xd2?\xaf\x93\xdf?\xf8<\xb2M\xb9P\xcd?\xaf\x14\xcc9\xcf\xcb\xd5\xbf1\xc9&\xa4\xf2\xac\xf1?WK\x9d&?\x16\xd7?\xdem\x9c\xcbsh\xf0?\x11\xf5\x06\x10\xbf\xb6\xb9?1I\x84\x8b\x96j\xf2?NKh\xc5\n\x1c\xd2\xbf\xa2\x19\xea&Ab\xdb?z6\xbcb\x9f]\xe3?\xef:\x87L\xb6\xb8\xd4?\xed\xa3\x1f\x16\xba\xcd\x85\xbf\xc9aM+\x92R\xd0?\x83\x12:07\x0e\xd2?("\xc5{\xcbB\xd2\xbfB\xd5,\x90\xc1\xd8\xa9?\xafB\x1c\xbf\xfeD\xee?\x01k\x02\xf6\xd0\xfa\xbd?\xd2\xa0\xc2\xab\xe8\xe2\xbb\xbf\x99\xda=H#\xe1\xdb?\x08!\xaf\xcf\xf1[\xf0?\xf8\xbc\xd3\xed\xf1\xcb\xe0\xbf}/\xfe\xa9y\x84\xe0?\xc4\xe7\xad"O\xad\xcc\xbf\x83\x86$\xcd\xcc\xfb\xe0?\x9cA,rw\t\xde?\xf6\xa5\xf1oD\xe8\xe3?\xb4\xfbE\xf6e4\xd4?Q\xa25\xd4\r\xd5\xcd?\xd7\x91_rB~\xd9?p\x18\xa7\xb0\xf4a\xc3?U\x90w\xcdR\x8f\xe4?`\x9es\xa4\xd2Y\xe5?%\x1c\xe5\xdf\x08\x02\xef?d4\x12\xad%\xe1\xd1?\x9e\xa7\xa0/I\x19\xe3?\x12{\xef\xe0:\xf1\xba?k\x06\xb3\x86\xdf;\xe8?\x80\x10\xaf\xce\xa9%\xe2?\x14\'\xaf\xf5?\xd6\xe2?\x01@\xa6\x9e\xc9\xb0\xc5?hoq\xb7\xc4\x9f\xda?\x1ej\x08\xe7\xfa\xc1\xc6?E\xb4fk\x1cM\xd1?\xf5\x89\xf6\x80\xc7\x9d\xe0?X`<\x80W\x80\xe3?\x0b\xa2_{\x157\xd8?\xa1\xab\x88\x90.\x04\xcb?\xb1`\xe8\x97\x95g\xe4?<\x000\xee\x89C\xe3?`\x13\xa9\x07\xb83\xbb?)\x0c\xe4\x84\x8b5\xc2\xbf\xfeY\xd5y\x13\n\xd2?=\xc8\x0e\xc9C\xad\xc2?\xfc\xfe\xad\x86\xea\x1e\xd3\xbf\x1d\x9a]\x18\xe4\xe0\xe4?\xc3\x9f$\x952\xde\xd0?\xc7#\x89\x07\x0c\x16\xe0?<\xb6\x82\xa5\x1f\x8d\xaa?\xb9F\\\x0b\xc0\xef\xdd?\x03\xc2\xa4\xfa\xd9\x9f\xe5?\x04\x1ez\xe4\xb1C\xcf\xbf\x7f\x03\xf6\xbc\xb0\xbd\xb3\xbf\x14\xaeB\x10\xa8t\xc4\xbfJ\x98\x05cU\x80\xe9?!\x08"GW\xf0\xd6?=\xc8u?\x8b$\xd3?D\xc5\xed\xec\'\xd4\xe0?4l\xcd\xc6EM\xe0??n\xa0\xa9.\x1c\xe7?4\xf1\xf6\xcd\xe6\xbb\xd6?uU\xa6a\r\xb6\xde?q\xf0\x18z\xcf\x01\xca\xbf\xcc\xf1\xa0\xa6x\xd2\xc2\xbfsRW\x9aT\x99\xd6\xbfv\xbb\xca\x1f_\xfa\xd1?\xffM1Q\x0c\x10\xda\xbfcD\xcb\x89d?\xe2?!%\xe5\xbd\xea\xcf\xe1?\x90\xc1\x9aF\xf44\xe3?\n\xa6\x93\tb\xd5\xbe?\xaf\xba\xc8\xe1e\xbd\xe0?\xae<(\x16\'I\xd1?\xcdX\x93\x8f\xda\xb2\xd1\xbf\xc8V\x95\x01d\xca\xe0?\x85\xc2\xea\x14j\x11\xe4?\x866k\x94W\xbb\xc5?u?\x9b\xb5wC\xdb?\n\xd8\x80\x94\xd6v\xe1?op\xec\xf3\xf5\x91\xd2?kng\xbc\xb3\xda\xdd?\xee\x0b\xb3\xa1`\xe8\xa6\xbf\xbf\x9e\xdf)\xaa\x1e\xc3?"\xd3\x02\xf0\r\xf6\xe8?\x93S^f\xd7\xc8\xd1?\r\xd9\xf8\x0c\xfc\xd9\xc9?J\x17\xe3\x9cP\xf9\xbf?\xb9\x0e\xcb\xb1\x99\x82\xc8\xbf\xf1-|g\x8b\x93\xb6?\x8f\xf5\x1bfC\xc5\xd1?O\\\xa3i\x8e\xc0\xd6\xbf^\x18\xea\xce\xe6\xf9\xda?\x94\x88\xb6$B\xef\xe7?\xf2\xbc\x1e\xd6\xc1\xa1\xd5?\xde\x00\x98CT\xa2\xe0?M\xc1\xfc|\x06a\xe1?\t\xae\xa4O\xe7\xab\xe7?\x15U\xc5?5j\xcb?@\xbdB\x93\xcf3\xe6?\x89\x95\x14\xb7g\xea\xda?\xe3\xcc\x0b\xb8\x9a\xef\x85?\xbbh\x1f\xb4\x9ed\xd3?\x00~\x87X5)\xf0??\xf2G2U\xf8\xe4?\x8c0+@\xe8\xdb\xb3?R\t81~R\xc8\xbf\xd3\x82\xb4\xf2j\xc0\xc8\xbf\xcd*\xa7\x845\xea\xa8?\xdf\x19b\xfc\xca\x8a\xe0?\xdfC\xff\xcb\xe6y\xd1?A\xc9s\xf2Z\xd1\xe4?]Z\x9b\xdfYk\xe0?\xfa\x80Z\xc1\xf7\xc9\xdb?y w\x12\xa9\xb1\xa3\xbf\x19i\x88\x1e\x10\x94\xe2?\x1dSek\x16\r\xe7?&\xe9\x97\x9bE\t\xcb?\x82Ys\x1a\xf5\xc0\xe7?Rl=xF<\xda?\xb9\xb7\xb5\xfd\x95\x06\xd9?\xf4\r\x91\x98+\xad\xe2?\x97F:U\xdc\xdd\xd7?\x9dG\xf5,\x96\x91\xe2?\x9b\xaeH\xee$\xf5\xe1?\x00A\xeck\xe8x\xd8?\x8a\xe7\xb0\x1c\x11s\xc8\xbf)\xef\xc3\x14\x81\x9f\xed?i\x80l\x88P\x10\xdf?s\x86I\x06\x88\x12\xd1?b\xfenY\xdf\x89\xdb?\x02\xf9\xd7\xef\x8f\x18\xaa?\xa5IZ~\x8b\x87\xd8?\xf8n\xdb\xf2\x06\x86\xd1\xbf\x01X\x81\x0f\x1d!\xb4\xbf|\x8f\x81\x83\x14\xf0\xa8?\xdf\x8e\x07[\xca\x1b\xe7?\x1b\x85\xbb\x0b\xe9>\xa7\xbf.~\xe9\x1f\xd2\x7f\xd5?)\xed\xd2NN\xc5\xe3?C \x86@.\x1e\xe9?\xd6i\x05\x18\xad\xb6\xe1?\xa8\xaa\xcf\x9c\x15x\xe3?xXZ\x01W\xc6\xe4\xbf\xd3t\xce}+\x1c\xe9\xbf\x8e\x8b\x92\x8d\xe6\xe2\xee\xbf\x86\xccU\xcf\xca\xef\xdf\xbfg$\xaeQ\x02\xcd\xe0\xbf\x9f\xbe\x85\x9c\x00\xae\xec\xbf<;\x95\xcd3\xb5\xd8\xbf\xbd\x836\x9f#r\xe8\xbfc\xdd\x02\xd2T:\xe6\xbf5\x9d\xef\xce\x05\xb9\xe7\xbf\x0c\xc5\xa7\xedKv\xc1\xbf\xf24;\x12\xb52\xed\xbf\xc0T\xc6<A\'\x88\xbfD\x95Ed\xcf\xb8\xea\xbf\xfe,,\xcd\x13\x17\xe5\xbf1PfO\x06K\xe2\xbf\xb75\xd0\x11\x0c\xfd\xc5\xbf\xd8\xfc`\xad\rj\xd3\xbf\xd0\xe8o\xc8\t|\xc7\xbf\xdd\xe1\x87\x0c\x96\xb2\xe5\xbf\xb7\xf78\xdd\xef\xc4\xe6\xbf\x1a\xbdgH/)\xed\xbf\xda\x081"\xa1\xd9\xb4\xbf\x95\x9eD\x18<\xb1\xe2\xbf\xf2\xf9\xa9\xc2\x1c\xb7\xea\xbf\x88=\x15\xd9\x00\xe0\xee\xbfp\xdb>gI\x1a\xe2\xbfx\xa1Ci9\xd5\xd0\xbf\xb6\x95\xde\xfb\xd7\x9b\xd7\xbf&8\xa1\xad\xb1\xb5\xd5\xbf\xb8l\x92&\xc6{\xe0?\x9f\xf08Q8\xb2\xf0\xbf(M\xc1\x08\x96\x08\xcd\xbf\xd1\x17\xa2Lk\xa2\xea\xbf%N\x80\xfe\xed\x19\xbb?\xd7xZ]\x81\xc7\xe9\xbf\x05\xfe\xfd>\xe50\xdc\xbfg\x05j\x12\x13y\xa4\xbfa\xefz\x80! \xda\xbf\x8f \xcf\x1e\xea\x1a\xdd?\x8bp\xeb\xdc\xe6\xfa\xe7\xbf/c\'\xf3_c\xe0\xbf\x03\xfe,\xaa]}\xd2?\xe1\xdb\x9d\xb3\xa80\xe7\xbfLN!\x07\xf3\xf5\xe8\xbf\xcc\xab\x1c\xc2\x94E\xe9\xbf\xf8\x07k-w\xe0\xe3\xbf\xe4D\xbe\x9b\x94\x14\xe4\xbf\xd8\xfeb\xb1d\xb5\xb6\xbf\x83d\x8c\xec\xc2 \xc2\xbf\xb8\x9eFkv|\xda?4\xecj\xa2\x7f\xef\xe2\xbf\xdf\xc9\xbf\x97\xdfV\xb0?\xd2\xdf\x80\xd5\xfd\xd1\xed\xbf\x1fc5l^\xb7\xda\xbf\x81\xf7\x96\xe7#\xb2\xee\xbf\xc1\x90\x8cGB\xc4\xb8?o\xe4\xbaR\x8c\x8c\xee\xbf`\xe6:)\xedE\xe7\xbf\x84\x8f\xed=B)\xb7?\xc94Kx\xd9k\xe9\xbf\xc4\x13\n\xa6\xd5,\xe5\xbf\xc9JE\xa0_\xce\xc7\xbf\x95\xc9\xd6\xb8\xccK\xd8\xbf\xe2\x8a\xd6\x10\xb3\xcb\xee\xbf?\xf5\xb7\xe8\xfbc\xda\xbf\xf1\xec\xfc\xd0\xba\xa0\xe7\xbfke\x05%\xc6\n\x91\xbf\xdd\x11^k|S\xd0\xbf\x87k\xe5,\xe7\x0f\xf1\xbf\x7f\xe4d\xfa\x880\xe9\xbf\xc5\xdbu\x89\x9e\x89\xea\xbf\x16\x16\x06\x00J\xb6\xcc\xbf\xc6\x05\xf99\xa2\xf8\xd8\xbf#\xcc\xb3}\x0bG\xe4\xbf\xf5}\xf1A\xc5w\xe0\xbfQ2-\xfeq4\xe2?\x1c!\x89\x15x\xf1\xd1\xbfTdr\x17\xeb)\xdc\xbf\x8fA\xa1U\xc5\xe8\xea\xbf\xa1:\xb4\x80\xffP\xce\xbfd.Z\xed\xcab\xd5\xbf\xca\xf7\xc4\xd6q\xc2\xe6\xbfH\t*\xd0\x1bw\xe4\xbfu}:<\x97+\xef\xbf\x06\xaen\x8e"m\xed\xbfq-!\x10\xca\x80\xd4\xbf\x8d\xed\x0c\xe8\x0bT\xe2\xbf\xa9b\x11\x01/C\xe0\xbf}i\xc8\xc9\x08\x82\xeb\xbf\xf5\xe9P\x03\xd7\x14\xe2\xbf#;?\x03Es\xdd\xbfN\xa4=\xb6\x81\x17\xb0?\xeb\xe2m\x06\x1e\x1f\xe1\xbfk\xd8CD\xa0(\xcf\xbfS\x15\xa5\x05\x87\xba\xe3\xbf\xc0\xa2\x0c\x17\xaef\xef\xbf\xc5\xf5&\xdc!V\xeb\xbf4\xf3w\x1a\xb0L\xd8\xbf\xce\xe4\xef\x15\xb3\r\xdd\xbfxHO\x92V\x7f\xe6\xbfE\xf8\xeb\xa8\x8c\xb9\xeb\xbf\xe3Y\xdc}c\xbc\xd9\xbf\x80Ap,\x1c\xaa\xe6\xbf\xea\xc7\xa6r:\x87\xe1\xbfC\x18{~)v\xe1\xbf\x12\r\xd1\xac\xb2\xeb\xee\xbf\xb7\x98\x933\x92j\x80\xbf?\x88\x88h6t\xef\xbf\xf82nP\x14\xde\xe6\xbfh\x1c \xb3\xc1\xb2\xeb\xbff\x08\xb4\x9b;\xa0\xb5?V\xc9\xdco\x10\x93\xe6\xbf\x1f\xb0\xea\x0cKV\xed\xbf\xa9C/\x03\xa0d\xe2\xbf\x0fq\xd2\xbf0\x9e\xe5\xbf\xa1\x97\xf5%\xaa\x89\xe0\xbf\x8f\xaa$I$\xe5\xde\xbfgz\xf3\x15\x16\xd0\x89?\xcd\xbb&\x81n\x02\xd4\xbf\x95\x08\xd0\x82\x84=\xe1\xbf\xaa1\xdcl\xa8`\xe7\xbf\n\xfe\xbe\xc2\x05B\xc9\xbf9\xde\xed\xe2k=\xd8\xbf\xb9y\x85\n\xb0\x1e\xf0\xbf4\x90\x17q\xa8\xd6\xe2\xbf\x98\x91\x05\x18+\x89\xec\xbf\x9a\xf6\xe0.*\xbb\xc7?\x98\x12\x92\xa4\xe3:\xe9?\xfd\x89\xd3\xf8C\x8a\xe3?\xe8\xda0"\xd6Z\xe6?\xb6\x8b\n\xc5\n\x9f\xe4?\x89xv\xf7-\xbd\xe4?\'v\x82S\x8d\xff\xe2?3_\x01d6=\xdc?j\xc2\x11\x87\xc9\xba\xe8?O\xd2\x84T\xd5;\xe6?y\xb2or_\x0c\xea?\xf4\xaf\x88\xed\x85\x82\xdd?"S\rH|p\xe8?\x17@\xa6H47\xea?\x8fB\x1e,Mt\xe8?\xc0dl\x96\xaf\x9f\xe3?\xb8\xe8\x10e\x89\xa7\xe3?\x01\x80\xceyQ\x87\xde?x]\x93\r\xd6\xdb\xda?\xf6\x1a\xa7g5\xfe\xcd?\xa6\x92\xf9\xa1\xf9\xcf\xd4?M\xbcK\xba\x13\xa2\xe0?\xfe\xdbb\x93\xd3\x88\xec?\xd7\xce\xab\xdf\x82\xf8\xd2?\xf1\xc5~\x8fv\x18\xe4?\xce~\xd90\x96R\xe6?)\xc5\xd8\xe2\xa2\x14\xe7?\xc0\xe0\x171\x83\xea\xe5?)f\xfb\x1a\xad\xa5\xd6?\x9a\x92\xc8wn\x80\xe5?\xe0\x0e\xa4|\x07\xbf\xe1?\xde\xb8\x17H\x1dO\xea?\xa4\x95\xf9\xcb\x7fT\xe9?>\xa4\xe3\xday\xe7\xe0?\xb3\xb5S\x01\xa3Q\xe8?\x92\x15J\x10\x1dB\xf1?.^\xef\x14\xf32\xe6?Y\x06\xc3\xa0\xa6u\xe3?\xe7rt\xe3&\x91\xe2?\x0e=\x9c\xfb\xcdG\xc0?,T\x82\x0c\xec\xbf\xd3??\'\x9d\x1a\xba\x1c\xe5?\xeb\xb3d\rD%\xe4?gV\xb0\x14\xe7\xc1\xd1?\xc7*\x12SO\xda\xe6?r\xda\xfc|\xa2C\xe4?\xed\xad\xbb\xc9\x84\xe8\xe7?\xf8]4:~\x94\xe8?\x00\xf0f5:)\xea?\xb8X.\xbc\xa9\x84\xe4?c\x84T(\xac\xc5\xd4\xbfV\x1c\x1c\xb4K\x7f\xd4\xbf\xc12\xe5k\xa1\n\xc4?\x95\xbf\\@\xd2\xee\xad?\x07\x80\x06\xac\xdeb\xe7?K\xe2\x93r{\x87\xe0?\x043O|3Z\xe2?\xb4X\r.`\xce\xd8?\x8e\xa7\x9b\x01\x89\x8e\xdb?\xf7u\t\xe2@n\xeb?\x13\x8e\xa7{\xeb\xaa\xe2?\xdc\xf9\xaaN3=\xe9?\xc0X\xb8\xb6\xab\xa7\xec?\xb3\x19j\xdfl\xa9\xe8?d\xf6\xb48a?\xe9?F\x15\xb1\xb4W}\xe6?G\xd0\xe3r^o\xe5?\xdb\x0cd\xbfwd\xe8?W\x10ZI\xc0\x07\xe8?\xb2\xb8\x9e\xed\xd9\x8b\xa0\xbf\xac\x1cQG:M\xe3?d\x16\xdaX\xa7\xd5\xd3?\xe2\x86i\xf3\x98\xf6\xde?\x1d\xc5\xee8\xea\xf0\xe5?\xf1\x01.\xd1\xc2\xce\xd5?\x8buO\x01\xe7\xae\xe3?\x8f\xad\xe8\x06\xe8\xc0\xe1?$Qm\x91\xa7\x14\xcf?\xda\x96\xd2\xe7\x01\xc2\xe3?\xc7\xac\xb2\rw\xdf\xe5?\x96\x9aS\xd2\x17\xec\xd8? \xa1\xd9\xdb\xcb\xe8\xe8?\x0flX\x94(\x0b\xe2?S{\x9b\xc1\x0bM\xe6?\xb1\xe2VY\x07\'\xe4?\x9e\xaa\xe03\x19f\xe9?\xfa\r\xfd\xd0\xa8\xb0\xe5?{j\xec\xf0v\xc5\xe4?\x1e\x95\xdd\x9a\x9d\xa1\xe3?\x8f\xbd\xc0\xcc;\xe3\xd7?\x84\xa4%\xa8\xab\xd2\xe6?\x855}sI\xd0\xe2?OXV_\x90\xb0\xd5\xbf\n\xef#\xd7bG\xc5?`w\x96\xa0\xf1\xfc\xd6?9`\x0f\xfbn\xca\xf0?H\xc3\xc8}\xc9\xe4\xe6?t \x98\xec\x7f\xf0\xe8?@]\xcc\xf4{{\xe2?{.\x8e_\xe5h\xdc?\xbe\xb5\xc82\x9e\xed\xe5?7\xbc\xe20\x057\xe2?\x83\x10_m\xbe\'\xed?.I%\xd7`\xda\xe6?\x18ffH\x06\xc1\xe3?mP\x8f\xda\xa9\xf5\xcb\xbf\xcdw\x91\xb7\xe3\xfd\xe4?\x14\xb3V\xb6\xaa\xd4\xe6?9,\x1b\xf8\xff]\xed?\x14\xdb\x9f\x83\xb9\xd6\xe5?\x13\xda\x17J\x87\x02\xed?\x1f\x9a\xab\t\x8d\xaf\xe3?\x15\x18\x03\xad8\x14\xe5?\xee,\x1a\xe7\x9d\xae\xd5?\x87\x93\x1e\xf0\xdf\x9e\xe8?A\xce\xe1\xd2\x9f\xe9\xca\xbfr\xa0\xbea\xd0b\xe0?v\x00"\xca\xe6"\xd6?D\x0b\xd6\xe5LJ\xcb?\xcaCB\x04|.\xd0\xbf\xd2&\xc0N\x1dO\xda?\xfd\x17\xc2\x8bUo\xe2?wM\x95\xcfJ\x11\xe7?\xaf4\r:\\\xa6\xb1\xbf\xd2\xf4\xe8b\x8bq\xe0?\xe6*\xbf4O9\xe6?g\x87G[\xb3^\xe4?\xc8\xcdU[s\x98\xed?\x8f\x8a\x82\xc8\xc6\x92\xf7?\xbb\xbc\x9aG\x8b\xf1\xca?\x96\x83\xd5I\xcc\xcf\xd0\xbfTa\x07%\xf9\xbc\xd9?\x94\x8da2\x93\xf6\xde?\x97\xce\x06\xa3\x05G\xe6?X,&\xe8 \x88\xd2?\x93\xd9\xd6\x82M\xd1\xeb?Jl\xb0\xa4.8\xdf?\x9a\x02\xb8P\x15,\xd3?\xaeW\x90\x87Eo\xe1?\xafyV\xff\x87\xf5\xe3?a\xefV\xb4?\x06\xde?\xd3\x9b\xe5\xc9J\xb1\xf7?k#v0\x01\x83\xe7?!g\xf1kUs\xe2?\xd9I\xcdb\x1b*\xe4?\x1b]L\xa0:\xdb\xe1?\x14\x19\xc1D\xd5\xf5\xef?\xfb\xe6`BF\xef\xf2?\x851?\xaa\xeb\xaa\xe5?T:n`6y\xc3?\xf1\x85\xe5A\xbad\xcd?\x91m\xda\xdd\x90j\xeb?\xd3X\x86"W\n\xe3?(\xa8\x7f\xe5!(\xd9?\x1b\xca[\xe3\xb8\xc8\xcb?\xa6\xd6\x92\x1aD\xb6\xdb?\xcd\x80\x96\x8c\xfd7\xc9\xbf\x05\x87\xc80\xaa\x98\xef?\xaaQ\x80\xafd\xc7\xe0?\x0e\x1f\xedM\xc1\xaa\xfb?\xa9Wp\xdb\r\xe0\xd2?\xd3\xf2\xfcS{8\xeb?h\xde\xb0\x1d\xdf?\xd3?\x05bz\xec\x90k\xec?\x12\x00CEI(\xde?j\x8e\xca\xc5\xa7\x88\xf0?\xd4F\xaa\xc3\x07G\xf2?\xcd&\x93z\t#\xe0?\x0e\xd3\xf1\x93\x05\x94\xf4?\x1aG\x91C\x9a)\xeb?\x875\x0c\xdda\x08\xe2?TN\x05\x15\x89\xd8\xf4?\xd3\x93\xc6\xae\x87\'\xe7?\xb9\xc7\xa7b$\x9d\xe3?\xde\x1b`w\xf1\xe8\xea?\nT,=^\x0c\xe3??\xe4\xd5\x0f\xcaO\xe5?\x02-\x03V\xb8\x84\xd0?\xf7\x08\xe7\x1c<\xed\xdc\xbf\xca\xe8\xdc\xab\x85_\xc1?\x154*S\xb4i\xe5\xbfP\n\x8b\x82\x04\xb9\xe0\xbf\xea\xf9\xe8\x84J\x0f\xc5?\x16\xd3\xb5?Q9\xf0?\x12JY\xd2\x8ab\xd8?\xcar\xbcZ\xfc+\xf5?8\xbe\xb7\xac\x17\x12\xd8?\xf1\x18\xd9\xe6\x8f~\xa9?\xde\x8d \xcc\xe7\x9d\xf6?z\xe796\xceG\xd9?quv\x89\x84\t\xd1?\xfb\xd5\x9f{i\x14\xf5?]\xc2\xae\xe6P\xaf\xee?\x9bA\xc2\xb1\x8e>\xa6?_\x9d\xeb\xf4\t\xdd\xf0?\x0b\x8d\xe7\xd6\xe2\xab\xd0?3u\xa2\xae\xb3\xe9\xf3?q\xaf\xf7U\x95\x89\xb5?\xb7v\xa2\xb1\xfb\xf6\xc2?\xf2$\t\xea(\xa8\xdc?\xe2`_-\xfc\xa7\xc8?^[\x94\xefq\x84\xee?t&<G\xb4\xc9\xd5\xbf\x92h\x82\xd6\xf3\xdc\xb5\xbfs\xd8\xfbG\x97I\xd4?\x8b\x8a\xd0k\xa5\x9a\xe5?\x95\xa1%\xf7=\x19\xf3?\xccn\xc7\xcb\x1e\x8e\xed?\xdcZt\x07\xa1_\xdb?\xe2\x80\x01\xe77\x03\xf1?\x12\xc2\x12\xd8\x0c\xd4\xf1?S\x98\xf2\n\x1a\x9d\xeb?\x072\x94v\xda\xd8\xb6\xbf\xd7\xb1K>\x03P\xdd?\xba@\x1e\xad\x80\xaf\xd9?\xach\xb5j;Q\xed?\xcd.\xbbd\xf7\xe3\xce?\xa2}7\xf1\xac\x8d\xb6\xbf}\xa7U2\xcb\x8e\xc2?H\xdf\x80\x85%\xeb\xc9\xbfY\x11\xda\xb0LE\x93\xbf\xa7L\x1d}\xbc\x96\xed?H\xa5/6\x91\xd8\xe0\xbf?|\x88\xfc\x1cz\xe4?\xd4+\x8b\xe0\xa3\xe6\xdb?w\xf2\x87FA\x98\xd5?\xc7\xf3]\x01\xca\xe5\xe5?\x98\x03H53\xb9\xee?\xa9\x19\x8a0\x01\x8c\xd2?\xfa\xb9\xa8u%\xa9\xde?\xf5N\xdb\x86>\x9f\xd8?\xb7\xd0nw4\xf3\xec?\x10\xef0mz\xcf\xa2?O=\xefy\xe3\xb3\x93?8\xd8\x14\xbe\xf6i\x9e?F\x84)\xbd-\xe1\xc4?jN\xec\x0bf\xec\xe5?\x07\x8e/Q\xa7\xc3\xc1?\xae\xdf\xb7`B\\\xe4?\xe9r\xcc|\xcd\x81\xba?\xaaU!\x83U\xdf\xf2?3\x0b\x80s\x0e\x8f\xd3\xbff;S1\xc2\x82\xde?\x0ba\xfb\xa5\x02\xa0\xb0\xbf\x84\xb3\x1ev\xe1K\xd6?\xdd\xf1\x8f5\xae\x16\xe5?\xd2\xf7\x04\x8e\xaa*\xe6\xbf}\xbc\x1b\x12Y\x86\xe2\xbf\xf3\xf8\x8bL^)\xe6?]\x04\xb2\x12\xc1H\xb2\xbf\xca\x15$\xf2\xe5Y\xed?\xf3\xe7T\t\xfa\xcb\xca\xbf\xd3\xbcP\xc71\x94\xe0?[\xd9s\x90~\xd8\xc3?Eo7\xdc\xaa\xe9\xe2?u\xd8\xd9\xf7\xd5\r\xdc?\xe0\xa4\xa6\xdeg\x02\xd0\xbfX\x8b\xd4\x84R\xea\xdb\xbf\xb8\xa5\xc1\xcaBJ\xd6\xbf\xd5\x94i\xdcu\x11\xdc\xbfRy\xdc\xfe\xd2\xe6\xdb\xbf\xdb\x10\x8f\x1a\xb6\xf1\xd1\xbf\xa4\xbe\x96.\xa4\\\xd8\xbfS\xa4\x11\xb9WF\xd3\xbf\x17\x0b8\x81\x8a\x97\xda\xbf\xb0\xf3\xa1h\x85e\xd9\xbf&\xbcx\xdc7\xc1\xe1\xbf\x93\xef\xaa\x88X\xb9\xcf\xbf\xc2\xb3v\xef\x12\\\xda\xbf\xee\x1a#\xed`~\xd2\xbf\xab\xca\xb0\x089\x8d\xe2\xbf\xb8C\x062\x89\xca\xd7\xbfX\xde\xec3\x151\xdc\xbf\xa7&\xc4\xdb:\xee\xd1\xbf {j\xd6!a\xd6\xbf\'O\xd5\xeb\xdb\xde\xd0\xbf\xc7\xd3\xb2\xcc]\x88\xd5\xbfB\xe4\xc7\xcb\xe7\xca\xda\xbfQ\xba\xbao\xcf\xbc\xdb\xbf\xc8\x86\xdc%\xaf\x05\xd2\xbf#\x14\xaf\x92\xc1\n\xd3\xbf\xb1\x9c.\xa2\x847\xdd\xbf\x8bqRJ\xd1\x1c\xdb\xbf,R.\xe1\x97 \xd0\xbf\xe3`\x1f3+\x11\xd2\xbf\xa3\xad\x848\x0c\xe1\xda\xbfX\xd4\x18]:\x92\xd0\xbfRNx\xb1\xaa\xd7\xc8\xbf\xd3&\xa08\xe8\xb3\xe0\xbf\xc3\x1cK\x8f\x1c\x9b\xd3\xbf\xa7\xb8\x16\x90v\xbc\xdd\xbf\xb9qV\xf9w\xfe\xcc\xbf\x00\xd7d%\x0b\x1d\xdb\xbf\xc6[\xff\xde\xe2\xc5\xdc\xbf\xc8\x8f\x95\xaa\x10\x97\xb0\xbfiAo\xc3\xe3,\xc3\xbf{\xde\xe0\x1dH#\xb7\xbf\x96\xff/3\x80\x1c\xe1\xbf\xed\xecR\xf4\xfa^\xdd\xbf\xd9\xbe\xe4T\xeb@\xd7\xbfq\xb2\xf4\x86\xa2\xcf\xd9\xbf\xdf0\x93G\x9b\x81\xda\xbf\xb7_\xd7\xf9b\xc4\xdf\xbf\xeewx3\xc8B\xdc\xbfx\xe9\x1b\x94\x8a\xc2\xdd\xbf\x87q\xf3\xde\x08R\xae?\xa0f\xe3\xf9Y\xf2\xc7?\xc2\xd6\xa3\xae\xbe\xae\xc4?]J>=\xb3$\xc4\xbf\\\xddpOS\xf2\xcc?\r\x8c\x06\xd1\x9c=\xd9\xbfkL\xa9\xd7\x95\xd4\xdb\xbf\xf3G\xbc8\xca8\xd7\xbf?>\xfa9\xeb5\xd9\xbf-p\xc4,\x06\xe1\xdd\xbf;^#h\xa3-\xd3\xbf\xa2m\x7f[\x18v\xc9\xbf\x89\xb7#b\xad(\xda\xbf*\x0f;\xc5y+\xce\xbf\x88.\x83\xbc;\x9b\xd3\xbf\xa1l\x1e%\xd4\x10\xd6\xbf4g \xc6\xdex\xd7\xbf\x02\xad\xdb\x91\xae.\xd8\xbf\x1fV\xf7*\xae\xa3\xdd\xbf\xfd\xc8A\xc7\x01\xbf\xc6\xbft\xa99\xa5\x8a?\x89?R<Wj\x9c\x16\xe0\xbf\x14:)\xd3+\x9e\xd4\xbfo=\x8c\x10\x0e\x9e\xd6\xbfV\xcdA\xcdT<\xca\xbf7<F\xf1\x05W\xb8?\x03A\x91\x0e\xd6\xd1\xd4\xbf\xf8\xe0\xf5Q\xdb\xa7\xd4\xbf\x8fPNG[D\x89\xbf\x11Q\x84Y\xaf\xe7\xd8\xbf\xc6\xb8\x08\x07\xa9_\xe2\xbf\xde\x18\xbdd \x98\xd5\xbf\xc6W\xcfu\xceI\xde\xbf-Z\x8b\x0e\x0c5\xdb\xbf\xf9\xfc\x86\r\x131\xdd\xbf\x1d\xc4\xe5\x80"A\xd8\xbf\xff\x9d\x82\x0eA\xde\xd7\xbfja:\x160\xcf\xd3\xbf\xc3\xb1\xb7\xfe9\xce\xd2\xbf\n\x92z\xd5s\x91\xd9\xbf\xa3\xe9\x89~5\xf6\xe1\xbf\xf8\xcaD\x89\xf6\xf1\xda\xbf\x94k\xc5\xe1\x15\xf8\xd3\xbf]\'\xae\x9f\x11u\x97\xbf)\xc4$\x88\xb5B\xc5\xbf\x1d\x96 \xfc\xe8#\x9d?\x1d\xd6s9\xd1?\xdf\xbf\xf85\xa9\x17z\x7f\xd7\xbf\xe4\xcb]\xd1B3\xda\xbf\xc4bg\x81f\x82\xde\xbfW\xb3~\x9a\xf4\xde\xd4\xbf\x9c\x81-\x96h\x89\xca\xbfcs\xf7\xd3\xb6\x94\xdb\xbff\xc2\x04tS\xef\xdc\xbf\x0b\xf9\xc3\x9e6z\xd9\xbf\t%\xcbJH\xa8\xdd\xbf\x89J>\xd3\xa8\x8c\xd5\xbf~\x84S\xcb4\x84\xd2\xbf\x14\xe2\xe6/[\xbf\xd7\xbf\x9c~\x07\xeb\x99+\xdd\xbf85\x02V\xe5\xbe\xd7\xbfe\xf8\x11\xf2\xecj\xd6\xbf\x8c\xa9\xdeMSs\xd5\xbf\xf8\xc0f\xd4\xa8D\xc1\xbf\xc6w\xff\xcbp!\xe0\xbf\xc1\x92J\x03!\xb7\xd8\xbfc\xc6ET@\x8d\xd4\xbfBT\x8a\xd4\xb4&\xdd\xbfe]"_\x16\x87\xc1\xbf\xa7\xdf\xbd\xe3\xe5L\xbb\xbf_\x89\x17\x81\x90Q\xd3?4%#\xa2\x90\xe3\x8e?\x8a \xa3\xdd\xfa*\xd5\xbf\x04\xa6Q\xdc{(\xe1\xbf\xcc3\x83\x8c\x96\x89\xc6?\x18\xd2\x11~$1\xde\xbfS\xed.P\xb1\xa6\xd8\xbfx\x7f\xd1\xfe$\x00\xe0\xbf=a\x7fv\xba+\xdf\xbfX\x81QH\x8cJ\xd0?\xc7\xb7\'\xcc\x95\x14\xe1\xbf\xf9!b")<\xe5\xbf:\x92E=\xe3\xbe\xe3\xbf_E\x87O\x0e\x00\xe3\xbfB\x8a-b;\x9c\xe6\xbf}#\x042\x97\xa5\xe9\xbf\xed\xeb\xa0\x9b\xea\x11\xdd\xbf*\x9d\xb9\xdd\xc1\xec\xe3\xbf/+4\x160\x18\xe3\xbf\xd1\xbd\x11^L\x1b\xe0\xbfo\x83\xcd\xefV\xd3\xbe\xbf\xbe\x0f\x9d(7E\xe4\xbf/\x80\xddOM.\xdc\xbfC\xc9\xe1E\xac\xb3\xe2\xbfA\xd2\xfcn|S\xe2\xbf\xdanO\x9a\xbc\xd1\xe4\xbf\xcc\x90)\xb7Y\xc0\xda\xbf\x9b \xf4\'\xe94\xd1\xbfy\xc6\xa9\xbb^\xaf\xce\xbfp\xfb|\xaf:8\xde\xbf0\x10\xb8\xef\xe4W\xdf\xbf\xb5\x03\xf5\x98\x9c\x8f\xe7\xbf\xae\x1c\x9d\x9e;\x14\xc5\xbfa\xe1\t\x9b\x94s\xe6\xbf\xde\xaeoC\xe0\xaf\xe2\xbf\x91\xa4\xef\xd9 \x95\xe8\xbf\xd3\xe5\xa7\xe6\x83\x13\xe2\xbf\x13\xb6\xfd\xe6J\x8b\xdb\xbf\xe1Wi\x0fF_\xd9\xbfR\xb8=&m:\xd0\xbf\x08\xe0\x15\xbdq\xf7\xdd\xbf\xc4\xa56L\x97\xd3\xe1\xbfo\xb2p\x83\x90\xfc\xdb\xbfqo\x96\xb3\xc1\xf3\xe7\xbfG4\xa4|\x16\xab\xea\xbf\x86\x87C\xa65\xad\xe1\xbf\x18\x9b%}?\x8d\xd8\xbf\xa5hAM\xfe\xf6\xcf\xbfhA:\xa4\xa8\x1b\xd4??\xc8\x92\xc3=\x95\xa2\xbf\xa1q\xdd&\x0c\x04\xe4\xbf\xe9\xb3w\x14\x87\xbd\xe2\xbfl\xeeR\x8d\xe9\x1e\x9d\xbf\xa6><\xa9\x8a)\xe1\xbf>=\x0f\x0e\xe7l\xe3\xbf;\xa9\xc1R{W\xe3\xbf\x05\t1\xbe\xcb2\xe0\xbf\xf2G\\\x99,r\xe6\xbf\xb7\xccF\x1d\xd9\xe2\xe5\xbfSJ\x88\xec?\x9f\x95\xbf\x9d\xf0\xf8\xab\xa4\x1f}?\xc9\x9fna\x03z\xde\xbfb\xab%\xa5\x89\x8a\xd5\xbf\x86k\xdbU\xfd\x0f\xe7\xbf\xb8F\x97W\x8b\x02\xe0\xbf\xcc\x1e\x9b\x11\x86\xf3\xe5\xbf~\xea\x14\xbeY\x19\xc1\xbf\x01\xe1\xc8\xd0Q%\xdc\xbf\xd1\x94Z\x95\xfaY\xe1\xbf\xdda\xbd\x13\x1b\xef\xb4\xbfB=\x86f\xa4\x87\xe1\xbfK\xae\xa8m[\xa6\xe5\xbf\x93R1\x90\xbf \xd7\xbf\x18\xea\xb38\xcfj\xe0\xbf\xbar\xed\xc3d\xd1\xe7\xbf\xa7D\xea\x85\xa1\x9e\xe0\xbfU~\n\xa4\xcfd\xe7\xbf]]Q\xb1\x0f\x9f\xa0?\xdd\x82\x94\x16Z\xaf\x8b\xbf\x18\xa1\xc4\xa5b2\xe7\xbf\xf3\xbe$\x86`\xa6\xa3\xbf\xfa\x96\xfd7e(\xe9\xbf&gJ\x1f\xd1\xab\xdc\xbf\xb3\xbbt\x8e\x1a\xe8\xd8\xbfR\xc0\x1c\x03\x97\x04\xe4\xbf:\x03\x9foc\x98\xdc\xbf\xd4\x92\x00qF\xb4\xd3\xbf\x96\xa4\x1ex\xadz\xe0\xbf\x8c\x19"\x95\xfc\xad\xe5\xbf\xa3_v\xd1\x07X\xab\xbf&e\xc0U\x9eU\xe4\xbf\xe5\xb9\xcf\xde-k\xd7\xbfE\xd1\xf9m|$\xe3\xbfc0\x0cXP\x0f\xe6\xbfR\x9f\x95\xcf\xdb\xd7\xe7\xbfu\x0e\xbf\x95K\x07\xe6\xbfU7\xb4\x97-\x8e\xc8\xbf\x8f\xf2\xc7\xfb\xa47\xde\xbf\x08\x80\xb7\xc6\xcde\xe0\xbf\xc1\\\x91P\xf6\xd2\xe5\xbf\xb3l*\xb0\x84\x7f\xe3\xbf`Y\xa1\xac~H\xd6?|\xf8_\xa5}0\xb7\xbf\x15`\x8eh0\x8b\xe2\xbf\r\xda\xd1y\xe6\x8c\xe9\xbf\x8d&\x0e\x0cJ\'\xe5\xbf\x1bo\x8a\xd3Uk\xe9\xbf\x07\xc5o\x84P\x0b\xe6\xbf\x8c\xe4\x11\xa9\x1f\xc2\xd6\xbf\xb1g\xc9\xbf3\xcd\xe1\xbfF\x0c\xb1\xac\xaa?\xdf\xbf160\xca\x90\xbd\xea\xbfM\r7#^\xd7\xe0\xbf\xe6\x85\xc9jY\x82\xe9\xbf\x1e\xfd\xae\xab`\xd5\xdd?\xcc\xc0\t|8\xbe\xd6\xbf\x91A\xc9\x13\xbcJ\xe9\xbf\xef6\xb2\x9d\xd7-\xea\xbf\x91<\xa2\xee\x14.\xe9\xbfv1\x86"GE\xe6\xbfr`\xf6\xb6O\xbb\xe9\xbf4\xf9y~;\xb7\xc2\xbf?\x8a\x95\xddG\xb3\xe2\xbf\xbf\xa5\xc8\xd9\x15\xc0\xe8\xbf\xdd\\\xe7\xcc&\xbb\xd6?\x82\xd2p\xdd\x9c\xc2\xe0\xbf\xf1\xacJ\x82\xe3\xfc\xb5\xbf\xe1\x80Bq\xba\xbc\xda\xbf$\xb4o\xd9\xe8\x1f\xab\xbfm\x1axw\x18r\xca\xbf\xdbY\x7f\xfcn\x82\xe1\xbf$\xb3\xf3\xba\xf4\xd4\xe4\xbf\xc5\x08\xd96\xec\x1f\xca\xbf\x0c\xf0I\xc0\x07\xd6\xd4\xbfG\xaaT\x983x\xe8\xbf\xde\xf3\xe3\xa7\xd2\xe2\xda\xbf\x7f\x95R9\x88\x9f\xe8\xbf\xf9]r\x0c\x97\xb5\xc4\xbfRK\xce\x17\x8aC\xd5\xbf\x8b\x1a\'m\xd7`\xd8\xbfh\xbfN\xf7\xc7X\xd1\xbf\xff?[\xba\xe0\xff\xd0\xbf\xa0t\xd3{\x1e;\xe3\xbf\x1a\x94\xc2q\x0e\xf4\xd2\xbfa\xb2R\xa2h\x12\xd2\xbf\x17\x0e\xdd\xcd\xd96\xd8\xbf-a\xf4Bp\xa0\xd8\xbf%\tU\xa8\xc2\xd6\xde\xbf\x94\xb0\xfcL\x96\xfd\xcb\xbf\x8co\x8d\xeb\xd0\x12\xd1\xbf\x18\xf2q]\xdb\xcf\xd1\xbf\xc2\x00q\xbd\x12-\xd8\xbf\xdd\x0b\x85@|\x96\xd9\xbf\xa1Q\x0c\xd1\x95\x98\xdd\xbf\x15\x90J\x89\x1c\x8f\xd8\xbf\x1d\x7ft_\n~\xd6\xbfG+`B3_\xd3\xbf\xa6\x98\xe7F\x84\xc9\xc4\xbf\xf6\n\x00g\xaft\xd8\xbf\x9c9i\xeb\xc9\x85\xd8\xbf\xd31\x94&\xdd&\xd5\xbf\x18\xa7C\xc5\xb0O\xdb\xbfN?d@\x93\x1d\xcc\xbf\x83\xd4\x19 \x18\xdb\xd0\xbf\xc9\xe8j\x11;U\xd6\xbf<\x03\x85`\x91?\xbd\xbf\xc0\xfb2\xab\x05\x9f\xd4\xbf*5\x96)\x1e\xba\xca\xbf2\xf5\x1dUe\'\xdc\xbfw0\xc4X&\r\xcf\xbf\xf5\x97m\xe6V\n\xd0\xbf\xe3\x15\xd3\xbc\x9b\xb6\xd6\xbfK\x81\xb1\x1fZ\x0b\xe5\xbf\xad\x82\xda\xf6Wy\xcf\xbfE>\x00\xd9\xffh\xda\xbf\xe8\x17\xe5\x92\xf5\xb2\xd2\xbf\xbb\xfd\x85\xc6O7\xd4?\xe3[4\xff&\xf0\xd5\xbf\xb17\xc88\xae\xaa\xd9\xbfbw\xa9d\x9b"\xd3\xbf\xd8\xa0\x87\xb5\xb6\x88\xd6\xbf\x85\x8eW75H\xdc\xbf\xd8\x1e!\x9b4\x85\xd1\xbf\xb7\xb0i\x9e\x91\xea\xd7\xbfD\xe2\x02\x85c\x82\xcc\xbf\xf9.\x93\\\xf7\xe7\xdd\xbf>\xccHAM\x1e\xd3\xbf\xff\x1c\xe5\x04\xad!\xb0?\x14v\xff\xe2k\'\xd3\xbf\xb3~\x1d7\xdd%\xcf\xbf\xa3\x91\x9b\x81\n[\xd8\xbf\xf9\xb4&\xad<\x1f\xcf\xbfl\xb9\xe0\xc9\xdc\xee\xd7\xbf\xe3+ \xf7\xe1\xa2\xd1\xbf\xa5\xb5\x96\x91\x0b(\xd3\xbf\x16\xb4\xdd9St\xc8\xbf\x80\xe4\x18\x88\x11b\xc3\xbfF_\xc1\xe5\x1a;\xc5\xbf\xc1JD\x96K\xc2\xd6\xbf\x16\xa1Zz\xd7\x08\xde\xbf\x98\xb7\xacEFg\xdb\xbf\x85)\xc5i/\x9d\xe0\xbf\x96/\xa3}\x93g\xca\xbf\x0e\x82[\x893\xf8\xde\xbf \xf5U\x86\xf8\x86\xdc\xbfLx[\x9fw\xa5\xb4\xbf\xdf\xca\xb8K \x98\xbb\xbf\x93\x12\xc5\xe8\xee\x13\xd5\xbf\xd1\xd4+E\xc0\x90\xc5?**\x03{}\xd2\xcb\xbf}b\xfe4\xb7\xba\xd3\xbf.C\x0f\x8a3(\xcc\xbf\x0e%\xa6\xb6\xd6\xdf\xcf\xbfc\xb1$]\x16i\xc6\xbf\x92\xcf\xf5\xfdr\x1b\xe3\xbf\x85\xb4*|G\x06\xe0\xbf\xd2\xc8.\xda\xed\xa0\xdb\xbf\xe4}\x17\xf1F\x1c\xbd?\x8a[\xe56\xd5\x04\xdd\xbf\xc8\x1d\x8a\xf3j\t\xd8\xbf\\g\xab\xc0\x1a\xb0\xd8\xbf\'\xd7\xa2\xef\x9dc\xcf\xbfX\xeasR\xef\xbb\xd1\xbf^\x06\xac\xf44\x02\xcf\xbf\xee\xa7\xd6bB+\xab\xbf\xdaz\xe6\xd3c\xeb\xd0\xbfv\xedT\xede\xb7\xdf\xbf\x1d\xf1\x86\x9aw\x8c\xce\xbf\x7fkv\xb9\xa2\xe6\xd1\xbf\xb6l\xfc\xacv`\xeb?\x8c\xe1\x90WWI\xd5\xbfd\xd8e"\x9e@\xd2\xbf\x93\x14\xf4=+t\xe7\xbf(\xb2q)\xe3\xa3\xd0\xbfq\x1e"s\x8a\xbe\xd2\xbfl\xf9\xc5\x02@6\xd4\xbf\xbb$\xde\x00Jf\xd7\xbfO\xf7\xcd\t\xac\x14\xdc\xbf6\xae\xfdFz\x94\xd6\xbf\x16k\x90\xa72\xef\xde\xbf:S)\xece\x8c\xd9\xbf7f\x93\x7f\r5\xde\xbf/\xba\x00*\xc8\xe3\xda?\xf1"\xf6uj.\xcf\xbf\x82\xd1{nus\xd2\xbfW\xbbc_|Z\xe9\xbf0\x98\x98\xf3\x85\xb8\xd0\xbf\tJ4A\x85A\xd3\xbf\xfb\x1f\x11\xcd\x9f;\xd0\xbfyr\xdd\x05\x15\xc5\xc6\xbf \x85\xc4\x1b\x1c\x1d\xdb\xbf\x9cL\x90\\l\x1b\xd4\xbf\xa9\x7f^\xfe}\xa2\xe1?\x8d\xc8\xd3@u\xbd\xcd\xbf\xacb$D\x91\xf0\xb9?Fg\x93,<h\xcf\xbf\x07\xdf\x15"\x9e\x8d\xbd\xbft\x97+L@\xaf\xb5\xbf\xea6D\xda\xbbS\xc3\xbfh\xea\xe5\x03\xb4\xe2\xda\xbf\x85\t\xf0\xa6&\x1d\xaf\xbf9\x86\xca-\xdb\xdf\xbf\xbf\xde\xc3\n\x12(\xab\xd1\xbf9\xe8\xe8G\xf9\x1d\xd9\xbf\xf2\'y\x7f\xa6\xe8\xda\xbf?\x00 \x12H\xeb\xc3\xbf\xcc^\xf8\xc9H\xc3\xe6\xbf\x92\x87b\xca\xab\xaa\xe3\xbf\xacM4.vQ\xeb\xbf\x002\xf5\xc4\xc2\xeb\xe6\xbf\xe2\x94\x11\x1aL\xcb\xe2\xbf%-\x90z\xfc{\xe4\xbf\xe6\xc9"\xdf\x8aR\xe0\xbf\x9a\xa76\xbe\xa0=\xe7\xbf\x88\x86\x1dt\x89T\xe2\xbf#:)\xfc\xd9\x83\xe9\xbf\xb0\x90-c\x96\xb9\xde\xbf\xf84\x89\xe4F\x97\xe9\xbfF\xf3<T(6\xe0\xbf\xcd},"\tb\xea\xbf\x19\x9b\xd1\xd5\xd5\xe1\xdc\xbf_\xbe\x00\xbf\xe4\xdf\xe3\xbf\xcbp\xff\x0bF\x8f\xe2\xbf\xcb\xd8\x06-\'-\xe3\xbf\xaa6\xd5\xda\x9cx\xdc\xbf8x~\x80\x0f\xd6\xe4\xbf\xba\x02(\x85\xef\xcd\xe1\xbf\xf5\xbd\xc1x\xef.\xe7\xbf~XC\x986\x1a\xd5\xbf\x84\xb8\xd7\xe9<\xbc\xe3\xbfXg\xa1\x0bI\xe7\xeb\xbf}\xe9\x9f!\xc8\xfa\xe8\xbf\xa5\x06\x01g\xf0|\xdf\xbflE\xd1\x03\xa8X\xe1\xbft\xfcv\xa7\xf3\xc5\xe7\xbf\x8f_U\xf2o*\xe5\xbf\xfb\x05\x99o\xdc1\xd0\xbfA\xd3\xbc]\x96\xdb\xeb\xbfR\xfaZV\x95\xa9\xe3\xbf\x17!m\x06s\xb7\xe2\xbf\xde\xf3\xf4C\x8a\x0c\xe0\xbf\xed\xa0\xcc\x81CL\xe9\xbf\xa0\xfaKy\x16\xbf\xe3\xbfg\xe8\xe5\xf4\x15\xbc\xd3\xbf\xcf\xb3\xe0\xe8\x94Z\xdb\xbf\xc0\xb3\x10tD\x06\xd1\xbf\xeb5_I\x9a\xda\xe6\xbf\xf4\x94\x83\x08O`\xe8\xbfC\x0bE\xf7%\xe8\xd7\xbfX\x8f\xeb$\x99\x12\xe6\xbfK5\x19\xea\xf1\xed\xe9\xbf\x9c\x98\xfb\xda\x8ax\xe7\xbf^\x8f\xfc\x88\xb2\xd1\xe9\xbf;\xd0E87\xb7\xe7\xbf|TFB\x1a\xd3\xcf\xbf\xb9>,\xc0\xa2d\xb0\xbf\x9d&\x1dr\xb7\xdf\xc6?\xee\x11_\x08\x9c\x02\xd4\xbf\xcfX\xabm\xa9a\xc3?\xa0\xba\x00=\x05\xc4\xe8\xbf6~-\xe3\x00\x1d\xe1\xbf\x94\xbb\x1d`\xf5\xed\xe7\xbf`\x1b\x0f\xf6\x90\xd4\xde\xbf\x91\xa3A`\xed\xab\xe9\xbf\xbf\xf2\xe8\xa7\xb4\x9e\xe9\xbf\xa0)\xac\xfa\xbb\xbc\xd6\xbf\x8d\xcaA\x80\xb8,\xea\xbfy\xf8\x80\x86Bv\xe7\xbf\xf3\xb5\xb5\xd6\x82/\xe4\xbf\xc1\xa9;u\x8e\xb5\xe4\xbf\x01K@*\xb7+\xe7\xbf+y\x10\x10\x1d\xad\xe8\xbf\x17\xa4a=.2\xe2\xbfVc;\xad\xd5\x8a\xd9\xbfv(S\xa45\xc3\xc5\xbfq\xa9E$\x86\x1d\xeb\xbf\xe0\xe5\xeez \xb7\xe2\xbf\x9c\xa17Rbf\xe4\xbf\x95\xbe\x159\xd5\xd6\xe3\xbf\xee\xbdn\x8a\xd0%\xb2\xbf\x8f?\x91\x874\x18\xe6\xbf\xed\xdb\x89q\xf9\x19\xe8\xbf+\x0eI \xe5>\x85\xbf\xf0\xd4\x1e`\xb0m\xe1\xbfN\xb73\x1fI\xcd\xe1\xbf5M\xddw.\xcd\xe2\xbf\xad\xa7\xaeN\xa4\n\xe7\xbf\xa5tD\xe8\x01\xf5\xd7\xbf\x8f"S\xad\x91\x94\xe5\xbf\xf4s\xccF\xc1\xf2\xe5\xbfh<s\x19k \xe9\xbf\xdf<d\xee\xb7\xdd\xe6\xbf\xe3\x1c\x92\x15^\x9f\xe4\xbf\xb5\x89R~\x18\x0c\xea\xbf\x0e{\x10\xeawh\xe5\xbfG\x089/8\xe0\xe4\xbf\x8fe"\x11+\xe4\xe3\xbf\x1f[\xa3\xefF7\xa4?\xe8\x18\xc0R\x92\x0f\xc7\xbf\xfe\x1f\xb9y$\x8d\xc6\xbf\xd9\n\x10\xae\xc9\xb1\xe5\xbf\x9a\xbd\x91\xa2\x81V\xe8\xbf\xf15\x00\x06Y\xdb\xe8\xbf\xb1F\xc6uB\xa3\xe7\xbf\xfc\xd5\xeb\xfb\x8f\x80\xe2\xbf\xb6\xa6\xb7?b~\xd7\xbf\xc0M$\xbb\xf9\xec\xe4\xbfP}^\x94\xbd\x92\xeb\xbf\x85\x85mLN\xd5\xe5\xbf\x17\x93q\x92\xe7\'\xe8\xbf.\xb9N\x1c\x06\xdd\xdd\xbf\xb1\xe3\x87h\x1bB\xe5\xbf\xef\x1a\x1f\x01\xa5\xed\xe6\xbf\xefi\xa8\x84\n\xd0\xe1\xbf\x9db\x18\ty\xea\xe5\xbfVNG\x97\xda\x94\xe7\xbfI\xe5\x92g\xb2\xae\xe6\xbf\x9f\xaa\xd3s\x05\xd4\xd5\xbfN\xc0\xcd:\xa8\xc7\xe5\xbf\x1b\xc9F\x92\x8d\x9b\xe8\xbf\x08\xcc\xc3&\x98\xf6\xda\xbf\x9a\xb1$\xacX6\xeb\xbf\xcb\xdb-2\xff\xf0\xd9\xbf8\xfe\\\xbd;\x03\xda\xbfT\xca\x99\xd6V\xdc\xd7?\xb1\xc5\xe383\xa2\xc5\xbf\x968H\xddn\xff\xe4\xbf?Vh\xcb\xb1-\xe7\xbfg`\xc0\xd6\xfc\x00\xbe\xbfZ`5\xf6!2\xe5\xbf\xc5\x06\x10\xd7\x01\xd1\xe7\xbf\x83\xe4`\x81\x05?\xe8\xbf\xd4\xa2\x96#\xc8\xbe\xe5\xbf'
p27
tp28
bag2
(g3
(I0
tp29
g5
tp30
Rp31
(I1
(I20
I128
tp32
g12
I00
S'E\xf4l\xe38\x88\xd3?\xd8\x9d1\tj\x1a\xcd\xbfn\xe2\xfa\x05\x04w\x90\xbf$\rMBQ\xeb\xa3?\xa1\xd2\x9f\xab:\x9b\xc5\xbf\x07\xb2\x89\xf8\xa3\x87\xdc\xbf\x96nN\xe1\x16W\xcf?\xfd\xe0\xc06\x9d\xe8\xcd\xbf|\x7fA\xed\xd9\xc9\xcb\xbf\xcc)\x8f>F&\xd3\xbf\x17#k=\xfc\xf2\xd0\xbf\xfd\xed\xb0\x1fx\xd8\xb7\xbf\x0c@\x06\x16\xe4\xfa\xd6\xbf\xbb1\x94\r!\r\xaf?~\x82\xd9|\xbeg\xd9\xbf\xdd\xe5o\x11\xb2\x93\xc8\xbf\xb7\x81\x94\xc2\x972\xd3\xbfo\xbeU\xc8\x13-\xdb\xbf\xfe\xfa\xed\x98\xa0\xd8\xd1\xbf\x069\xb4v\xe0\xc4\xda\xbf\xaeRs;\xf2x\xd9?\xf2\xc4.u\xe2\x08\xda\xbff\x0c=B\x82\xe2\xc8\xbf:"v~\xb2y\x90?\xe6\xc7\x1e\x98\xe2X\xc8\xbf\xc6\x04\xe1#q\xb7\xd2\xbf\xec\xefu\x941\xdf\xd7\xbf\x99q\xe3\xa9T\xe2\xdb\xbf.\x81E\xec3-\xd5\xbfPD+\xa8\xd0\xaa\xc5\xbf\xfd\xe0c\x9a\xd0n\xd8?\x87\xb4\x86\x9e\t\xe9\xd0\xbfh\xf2\xcf\xd8\xee\x8e\xd9?)\xf1\x9a\xfc8\xd3\xd3?\xfa\xdcH\x18\xbb\xe8\xdc\xbf\xa7\x16\xbdn\xc8&\xb7?R\xee\x0f\nq\x16\xca?lx\x9co}\xe0\xcf\xbf\xc8p\xbf\x8fN\x01\x97?\x03\xc0%>\xdf}\xd1\xbf\x04!%\x98\xf4\xce\xad?8\xd0EN\xc9\xad\xca\xbf\xca\x7f\r8})\xdb\xbf\x89\x9f\x04\xcc\x94|\xb6\xbf\xf9r\x8a\xab\x02[\xd4\xbfX)2\xf7/\x03\xb2\xbf\xbd\xd2R\xff\x18\xb4\xd9\xbf\xa8\xfat\x11\xdb5\xd4\xbf\xdc\x0b\x17z\xa2\xa5\xd1?\x1eb\x18\x874\xa3\xd8\xbf\xa9!\xc4J\x14\xf9\xcf\xbf^\',\xa7.\xe5\xb9\xbf\xb6PQg\xfe\x8f\xd0\xbf+\xb4\xf4~p\xfc\xc4\xbf\nxB~\x84\xcc\xd3\xbf3\xfc\xb1h\xf0\x04\xdc\xbf@1\x1c\x91\x89\x0e\xc6?\x1a%\xe3\xb9\xdbX\xd6?;\xc6\xb7\n\xbd\xf8}\xbf\x1c\x1b\x9bjVL\xdd\xbf\x02g\x9eVEL\xd1\xbfh\xf8\xbc6.g\xcb\xbf_\xfcc\x16\xda\r\xd3\xbf%\xf2"vs\xa1\xc3\xbf\xf2\xcb{/\xc5r\xa8\xbf\x85=0^\x99\xf0\xd7\xbf\xe1\xb2_\xb6\xd6k\xc1?\xf5Mo\xec\xe1\xf8\xa6?F\xf7\xf0`(b\xd3\xbf\x0610\x84\xb4\xcf\xda\xbfv\xab\xa1\xa6V\x17\xb8?}\x89s\xcfX\x15\xe1\xbf\xa4\x08\x91\xb6\x9e\xcb\xc1?\xf2\xabk\x7f3]\xa1?\xf4&\x06\xee|\x1c\xde\xbf\x10\x85JQ(\x89\xcc\xbf\xb2\x1c<s8j\xbb\xbf\x06B\xec\x0f\xa6W\xbb?\xc8\x1c\x80\xf6\xb4*\xd7?br\xc3\xfb\xb2\xbc\xdb\xbfNE\xa15%`\xd8\xbfc\xfau\x8eR\x11\xdb\xbf\x8e\xb6\xb4\xe2r.\xa1?\x13h\xea5\x8b\x7f\xdc\xbf\xc0\x88,\xf8]\x03\xd8?\x16\x13\xab\xfe$\xbc\xe2?*uY\xd6\xbc\xa7\xbe\xbf\x8879\x97\x150\xb7\xbfI\x93\xe3I:\x86\xd5\xbf\xb0\xbf\xa7%\xfa\xa2\xce\xbf\xf2,Y\xc9\xcbX\xac?\xbf\x17\xf8\x96\xc2\x89\xd2\xbfm\x13\xd7.\x87\x91\xc1\xbf\xbe\xdc\xf4\x8b9W\xd0\xbf\xd1R\xfb2s@\xc6\xbf\xcd\xc4\x92\xe9\xc7\xfe\xda\xbf\xc3C\xa1ro\x95\xd1\xbfQLQ\xa5\xbb\t\xc2\xbf\xb2\x8f\xe1\x1e\xad\x81\xd2\xbft\x12R\xb9e\x1d\xc0?V2\xdc\xdeK\xbe\xd7\xbf\xe9<\xf9\xa4\x04\xa5\xd3\xbf\xd6\x91 \x18\x84?\xbf?6\x98_\x82y8\xd8?\xc2\xdc\xc0\xd0\xef\xd4\xd3?\xf0h\xbb\xd0\xea\x8a\xcc\xbf4\x01l\n\x9c\xa8\xc3?\xc2\xde\x81H\x1b\n\xd1?\xb4[\x81D\xa8u\xd9\xbfJSxK\x90 \xc9\xbf\x06If\xe1\x03\xea\xc5\xbf}f\xec\x8d\x84X\xd5?\xb7\xa2\xcdI|`\xcf?\x06\x10\x16y\xcb\x15\xc3\xbf\xda\xd4\r\xdf`\xb7\xdc\xbflY\x94\xc1!\x92\xb1?\x8ac&\xac\xdb\xd3\xd9?c\x00o_\x9a"\xd3\xbf7\xeb\x85\tx,\x97\xbf\xb5\x92\xe6;\xc1\x16\xd3\xbf\xc0\x99\xb4B_5\xc8\xbf_\x93G\x83\x05!\xb3\xbf\xed`\xb8\x1e\x8e\xd8\xda\xbf\x89\x95u\x1a\x84l\xc2\xbfdiz\xbcs_\xad?9\xaf\x8a\x92M\x11\xdc\xbf\xe7s\xc9\x18A\xd0\xc4\xbf\x99\xefq\x80\xe6\xff\xd1?\xa6f\x0bRi\xa0\xd5\xbfat\x9c\x85{ar\xbf\xcf\xe6\x97\xd2@c\xdc\xbf@ \x92\xca\x01\xdb\xe4\xbf\xb4\xc3gPBF\xee\xbf\xbd\xb7\x13.*\xcc\xd6\xbf%\x86\x90\xc6Jk\xe1\xbf?[C\xde\xa9z\xec\xbf\xc0\xc4~\xc2ki\xe6\xbf\x87\x94%\xf3RK\xe8\xbfI\x81\n\x84%\x08\xd3\xbf(\x93\x10\x83eR\xe0\xbf\xcd\xae6\xd1`|\xc2\xbf\x16>\xaf\xfd\xd0E\xe2\xbf\xde\x87\x88\xac\n\xda\xdf\xbf\xe5\x7f\x87\xc0^"\xdc\xbf\xc9F\x026ll\xe4\xbf\xf3\x92Dp\xfdF\xdf\xbfc\xf2\xed\xe7\x81\xa2\xed\xbf\xb5i\x83\xae\xac+\xde\xbf\xfd\xd7\xb0\xd9n\xf6\xd2\xbf^\x1e\x8e\x00S\x9a\xd7\xbf\x82\x9c{\xe0\xba\xb8\xc6?6w\xb2\xef/}\xe1\xbf\xd2\xe3\xbfc\x9bn\xc5\xbf8\xde,>\xc0\xdc\xeb\xbf\t\xfb\xee\xc7n\xca\xe2\xbf\xb3\x00C\xe4[]\xd0\xbf/\xb7RBB\xef\xd0\xbfG\xf1Y\x02/\xe2\xe4\xbf\x8e\xe7v_\x14D\xa6?\r\x7f}\xbd\x9a\xc6\x98\xbf4\xc0\xda\x86\xff\x10\xd2\xbf\x01\x92\x1dG"A\xb4?\x10\xc2\xe5V\x80?\xe1\xbf\xe9\x89\x9f\xc4v\xaa\xc8\xbf\x01\x00q\xe9\x0cd\xc6\xbf\xc9\xbb\xb9\xe0q\x80\xd6\xbf\x18\x9e%\xb3\x83\xc0\xd8\xbf\xc9\x7f\xe9h\x0f\xfe\xd3\xbf,\xb7\x0b\x12\xff\xd0\xe3\xbf\xa1G\xc01\xd6\xf4\xd6\xbf\x8d\xa9\xc0\xf1\xdcC\xd8\xbf*)Ha\xed6\xc2\xbfxH5R\x0c\xdd\xd7\xbf\x03L7a\xc09\xda\xbf`wR<\xd8\x9b\xd2\xbf\x85\xc0u\xb9a\x8e\xe2\xbf\x02\x98\x12\xe8y\xd5\xd3\xbf2\xba\xe6\x0cH\xee\xe3\xbf\x91g%S\x9e!\xe1\xbf\xbc\xdaL\xaa\xecR\xe7\xbf\x19\x96\xa5\x86f\xa4\xe4\xbf\x88\xe3W\x95j&\xdd\xbf:r\x8b\xd6A1\xe7\xbf\xc1$\x1aU\xf4R\xd7\xbf;\xdf\xba\xae\xd4;\xc8\xbf&\xa5jy\x12=\xd9\xbf\x8b\x1c\xf7\xfeV\xd6\xde\xbfs.\xa8\xc6\xf1!\xe1\xbfZ~HI#j\xd0\xbfs\xdeR\xc0:\xdc\xe5\xbfR\'\x1bk\'\xf0\xe1\xbf-{C:J\'\xe5\xbf\xee4\x11\x99\xa5\x97\xe0\xbfb5\xbe\xa0J\x8a\xda\xbfo\x943\x1f\x04\xc6\xe4\xbf\xf5\x9f\x96\xa2\x0b\xb9\xb7\xbf\x94\xdeC\x18\'+\xe0\xbf\xcb|\xba\xeeQ\t\xd3\xbfU\xf9\xaa9I,\xa7?+K\xcaG\xd1\xf5\xd8\xbf-\x8d\xbd\xbf|?|?P\xdf\x98\x8aD\x1b\xd1\xbf\xabU\x00%\x84\x83\xd9\xbf\xf4\xf4\xaa\x88\x0e\xc3\xd2\xbfWz\xaa\xe5\x93\xa4\xe2\xbf\x10\x1fG\xf2G\xbc\xe4\xbfx\xecnG\xeb!\xab\xbf\xbb\xf8\xa2\x07\xda\x0f\xe4\xbf)\xb1\xba\xc5Fj\xe1\xbf-h\xb0\x9e\xc6\x1a\xd8\xbf\xff\xff\x98\x13\x82\xf6\xd9\xbfM\t\x1dC\x08U\xe1\xbfS\xbb\xf6Y\xf5^\xbd?a\x1e\xb8\xa5M\x1b\xc8?i\x83\xf4\x8b\x9c\xdb\xd2\xbf\x8e\xed<\x8d\x92\x96\xea\xbf\xf4\x15w@\x06\xbc\xd1\xbfK\x0e\xfe>O\xc6\xd6\xbfh%\xa7\xd6\x95*\xe2\xbfj\xdb\x97\xd4\x97H\xdd\xbf\x82C\x8f\xac;\x18\xe0\xbf\xae`\xff\'#}\xe4\xbfg\xc2yP\xfb\xf5\xe3\xbf\xca\xeb\xaf\xd1\x08\xfe\xc3\xbf\x88F\x14\xd6\xbd\x95\xe7\xbf\x82\x8b\xddc\x9f\xfc\xd6\xbf9\x04rx$p\xc8\xbf!d\xf6>\x9az\xb1\xbf\xb7\x96\x9b\x8a"\xd1\xc3\xbfs\xf6A)p\xc7\xdf\xbf\xb7E4\xd7;q\xde\xbf\xf6.\x81?\x8d\x00\xe6\xbf\xf8\xbb3\xf4\xb4\x98\xbd\xbf\x86\xcf\xe0\xe2^\xff\xe9\xbf\xcf\x8b"\xbc\xb7\xed\xc6?\xe3\xeac\xbfN\xa6.\xbf\xf5\x9c\x0f\xfb\xc0\x9e\xd3\xbf<\xcep\x16\xea\xe1\xe3\xbfc\x86\xbb\'\xdc\x90\xdf\xbf-\x7f Cm\x91\xa7\xbf\x87\xe0\xb61>l\xb3?\xeb\x1eZ\xd4J\xab\xd0\xbf\xae\x94\x86i\xd1\xb2\xd9\xbf\xdbG3D`j\xde\xbf\x8d\xa1\xdc\xb0\xc9\xee\xe1\xbf\x1e\xa6\xc9\xec&Q\xe7\xbf0\xab\xda\xd9\xdd\xdc\xe2\xbf|\xba1\x16zT\xd1\xbf\x90qF_\x01\xe0\xe3\xbff\x089`v\x89\xe4\xbf4n\xa3"\x95n\xe1\xbf\x1b\xc9\x18\xa4\x89\xfe\xe5\xbf\xffg[|n\xa1\xd7\xbf\xed\xc7N\xe2\x0e\xd9\xc2\xbf\xc2\x14L\xf5u\xcd\xe7\xbf\xb6\xf0\xcf\xc85k\xe2\xbfud\x85\xe8L\x11\x88\xbf\x1ef\xc7e\x1e\xef\xd1?\xc0tE\x19Q\xb2\xe7?\xf1/\xbb~\x13\xfe\xee?"\x7f5E\x94B\xe8?\xb1\xc8C\x1c\xac\xe2\xdf?\xc5\xbd/=\xa8\xf2\xd2?\xdc\xa7\x18\xe1\x82|\xde?\xb0\xe7N\xddU*\xdb?\xe4\xdd\xa9\xe9\xebD\xf3?30\xa2w\x18Q\xdc?\xdd\xa7\x1e\xf3\x05\x83\x93?\xf5"\xea\xfd\x1f\xc9\xe7?\xb3\xcc\xefV.\x15\xd0?z\x17\xd5\x11D\x04\xdd?\x18\xfd\xd7\x10\x110\xea?Z\xef\xa0\xe8\x98\xa4\xda?\xd8\x1a5c4\xfc\xe6?\\\xe8Fo\xa4\xeb\xe4?g\xd6e\xaf\xb1\xed\xda?mGD\x0cEC\xb9?\xfc\xed\x9d\x97\xfbn\xe6?F+\xa0x\x99?\xd2?\xe5[_)y\xac\xca?\xfd\xc5\x19L\x7f\x84\xec?\x93\x9ba+\x8b\x07\xe0?\x03I\xb6\x82y6\xf1?\x07\x01\xc2\xfb\x99\xe1\xe0?\xd5\x8aFB\x02w\xe2?\xc7\xb6\xa8\xf0\x1f\x9b\xcd\xbfAMR\x90#\xaf\xe2?\x8a\xae\xf9\xb9\xa2\xbf\xcc?<\x15\x19\xe9$\xc0\xa5?\x08V8\xc5\xd6\x94\xd8?%\xe9E\xd4\xc4\xa0\xe5?k\xeb\xdd\xd8\xb5.\xb4\xbf\x13\xbb\x86\xc8\xd2_\xe1?\x03\xcd\x16oV\xb6\xe4?xT\x0f\xbf\x06k\xaf\xbf\xa5\x10\xb2\xe1\xdb<\x82\xbf\x81/cc#\x91\xdc?3\xe2\xf4\x84\xb4F\xe1?\xa0\xaa\x80\xce\x04\x9b\xe7?\x82%\x88\x90"H\xd1\xbf;A-!\x9b\x0e\xce?\xc1\xe3\xf6X\x89\x93\xc8?\x96\xfa\xf4\x11P\x1c\xe2?q\xa8\xcbt\x19\x07\xf3?\xc2\x1e|\x96>k\xbd\xbf\xd0\xcc\xfc\xc8\xbbw\xee?\x96m\x12\x1f\xd7\xff\xd7\xbf7\x85\x12I\xc84\xca?\xa3\xa88\xa1\xda\xdc\xe5?\xcb,\xc5V\x7f\x0b\xf0?\xb5\xe5\xcb\r\xf0\xff\xda?j\\\xdar\xaa(\xef?|\xb0\xc9\x04\x0eo\xe4?\xf6\x04\xc4\rmT\xd5\xbf\xb7"\xd9J\x8c4\xf1?\x02XGC.\x8c\xe7?\x94\x9b\x11.\x93\xb8\xe5?r\xfc!\x8d\xea\x9c\xd0?aj\xea\x86\xf0\x80\xea?4\x1f \xcb\x99#\x8e?4\xc4\xda\x1a1o\xdf\xbf!\n\xa0\xbb\xa0[\xde\xbf\xd3Z\xdas\xaer\xe3?UX\x92l\x00\x92\xc3?\xa5\x03\xd0\xca_y\xeb?\x12E$\x88\x90\xe7\xd1?1^[:a\xd2\xc7?\xd5EMll\x1a\xf0?\x0f*\x13Z;\xd9\xcb?-\xcc1\xa30Q\xb5\xbf\x8d\xb5A\xd6\xac\x81\xe6?&\xb6F\x03\x1f\xca\xf0?ei9\xcat\xe6\xe7?\x93\xb1\xf0+jr\xd1?\xab\x1f\xeb\x00\x82\x06\xc3\xbf_Q\xdb2\x05L\xef?\x92\xb5\xba$\xd1\xaf\xe7?\xd4"\xa3\xec\xd6\xd0\xdd?\xc86\xa0\xbe_\xeb\xaf?\x9dO\xa4\xe8\xc7\xbc\xe0?\xb2\xac\xf6\xc7\xed\x90\xcb?\xaa\xa9\xdf\x04j\xc4\xc9\xbf\xb2\x0b\xe2\xd3p\x08\xc9?\xe6\xf8Xs\xc1\xda\xdd?\xf5VP\xa4M\xc2\xd1?IOE\\\xe7\xf4\xad?\xb2I\xa9t)h\xd0?\xf3s\xf6\xba\x86\x9d\xc9?\x15L\x00>\xa8\\\xe1?\x95AE\x9a\x14\x91\xeb?\x82\xe5\xb4\xa4\x1f\xc1\xe0?\x01\xb7Z\xde\xaa\x06\xc7?\x93V\x04\xc3\x01=\xd6?\xdd\xb4\x86\xda\xc3\x9c\xcd?\x9a\xa8U\xb9\xb6>\xd9?4\xf7\x89\xa8\xaa\xfc\xe2?\xa5\xae\x16/\xfa\x9d\xdc?\xb61\x86\x944\xc9\xe6?k$VE\x9f(Z\xbf\xb2_\x98\x1bn\x14\xb5?\x11~9\x84\xfa(\xe5?/_a\xce\xd3p\xd2?V\x0cA\xaf\x17\xc1\xb6\xbf\x80\xcd\xea\xf1\xa5M\xd2?\x17\x80\xee\xd0\x98\x0c\xe1?\xed\x90 ,\'\xc9\xca?\n\xd5o\xcc\xfdk\xe1?;\x1c\xc9\x1d4\xa2\xe1?C\xe9\xceN\xae|\xd1\xbf\\",$\xc3\xb2\xed?\xf4\x8b[]\xb3m\xdf?t\xfc\xd6\xfb-(\x9f?\xc1\x14\xe0O\x9a\xf2\xd4\xbf!K^v\xbc\n\xea?|\xec@\xd3\x9f\x9a\x97\xbf\xb2\x9d\xf5\xd3=7\xbd\xbfB\xbf\x85b\xdd\xb5\xeb?\xa8%\xe6\x9cC^\xdb?\x15\xb6`\x9e\xecL\xe6?#\xd5\x19\x98a:\xe7?\xe0V\xb0\xeae\xfc\xc4?m\xf6\x9dU\r\xef\xce?\x979\x81\xf8m;\xe6?\x14\xaf\x9d\xb2\xa7\xb5\xae\xbf\xcb\xf1?[\xd1\xb3\xf7?e\xa8"D\xaa\xf0\xe0?\xfc,\x14\x13\xb2\x98\xdf?\xf9\x93\xe5\x9bq3\xeb?4{\xab\x8d\x15{\xec?:\xe0\x03\xe6\nG\xe3?\xddn\xb8\xc0\x15F\xe3?\'\xc4.\xc6\xb3N\xe4?\x01_\xd1\xa79f\xe1?\xba\x9a\xdad\xdc:\xed?\x9f\x0e\t{\x03-\xe3?D\x14\xe3\x0b\xdbh\x8f\xbfI\xd2\xb3\x1b\xcc\x16\xe7?_\xe3(\x01_.\xda?\xf1\xb4<\xd5:y\xe7?\xe3\xdd\xb7\r\x01~\xe6?p\xbe\xa9\xd3\xf7Q\xe3?B\xb8D\x1d\xcf\xd5\xe3?\xb0\x92\x15\xda\x94\xc4\xe6?6>\xbd\x90\xa1\xf6\xec?\xcfO)\x03\x82\xb2\xf6?\x8c\xec<\x85|\x08\xed?\xf1\x8c\xb9\x03\xa7\xb4\xe6?\xaeK2\xfd(\xa8\xc5\xbf\xe6\xb3;\xeb\xd8\x00\xe7?UKn\x0c\xc2\x1a\xe8?\xd6\xebc\xb7\\\x91\xf2?\xe8\x8b\x11\xf5\xe5\x96\xed?\xaf\x18\x88\xe7\xfa\xf7\xea?\x93\xa2\x1cW\xd0\x83\xe3?\xe4Dx\xaf[]\xca?\x9d\x0e\xdc\x08.\xe5\xee?"\xe9\xccm\xc1\xa0\xc3?\xabp\xa0e\xafd\xd1?\xbfzX\xac\x90|\xec?O\xb7-\x161=\xea?\x14\x0c\xc9u0\xc1\xd1?.]\x9f\xa38v\xea?*\x85u\xbc\x1d\x00\xef?\xa8\xb536[|\xd4?\x81\xaeSD\xb3\xaa\xde?\r\xcc\xa9\xbb\x0e\xde\xe9?M`r\xdf\xe0\x8e\xe8?\xcb\n\xdasF\xaa\xcd\xbf\xf2\xafLo\x9a,\xe2?;\x13z?\xb8\xd0\xf0?\x7f\x9b\xbf\xe3Q\x04\xde?\xc9Q;\x07\xd1\x89\xea?\xc9\xf60\x8a\x9fn\xf8?p\x07I}\x8d\xad\xe9?\xea \x9f\x85\xf4\x9e\xa1?\xbdM\xea\xc2\xa6\xe9\xde?\xcb\x12\x8d\x9a\x1c\x80\xd8? "\xe7k7\x00\xe7?X\x0cq7\xf8\xdb\xe7?\xda.\xba5B5\xf4?\xd5\xe1\xdc\xd5\xc1\xa6\xe7?\xf9\xa7~:\x95\xcb\xef?.-\x1b\xa9s\x0e\xea?\xd3\xd8D\xd0M\xa1\xed?qZB\xbd\x7f\xd4\xe7?\xa0\x7fq\xc6@I\xe1?.\xf6\xc66\'t\xe9?\x01\xe9\xdb2\x1c$\xe2?\xce\xc4vq\x81F\xda?\x1c\xc4>\xfc0n\xdc\xbf\x7f/\xa2\xc7\x84\x94\xdd?u\x82igH\xa5\xc9?]P\x19\xb2\x00\xb7\xf0?i\x14\x8e\x17\x1b\x80\xe1?E\x88\xbf\x7fa\xdb\xdf?&\xee|um\xc0\xee?\x92\x93\xad\xaf\xe1X\xcd?\x08\x84C\xb1\xdeG\xe6?\x85)o0\xd47\xe6?,\xc72\x1c\x15\xb5\xea?\xbd\xddVv\x08\x95~\xbf\xa8\x11\xb9\x9cIb\xf0?9ea\xf2\x0f\x9a\xec?%\x07\xf5:\x9f\xff\xe9?\xb9d\xeazr\xd3\xf0?\xf3@JY\x86?\xe6?)\xb7$\x9e\x19\x80\xf1?\xcco3\\\xb7\xd3\xf0?:-\x05\x8d5\x89\xde?d\x99#n\xd70\xbb\xbf\xe7jqS\xfd0\xea?\x1a%WBX7\xe0?<w\xb3U\x8a\xee\xe9?\xd91\x1ai\xba\xd0\xe1?\xe7m\xffh\xd2\x91\xe6?\xf7e\xcc1\xcb\x1d\xe2?\xe8#\x86\xd3\xf1#\xe6?3\x89h\xb5\xb2u\xe7?\xf7gk\xcd\xb7\xcb\xdf?\x90R\xde\xe8c\xc6\xdd?\x0e\x98A\xc0)\xc7\xe4?V\xd7-K\xbb\x94\xf3?\x95hBhc\r\xf0?n\x16\xd1\x9e\xa9\xce\xd3?\xcd\xd4\xcb\x7f2\xcc\xe7?\x8d\x14\x80\x08\x14\xe7\xe3?/XU\x9bI\x99\xed?Z [\x16\xfd/\xda?\x87x\xf3\x99\xd6S\xd4?#A\x8bC\xed\xe0\xe6?\xa3\xfd\x93I\xb2\xec\xd7?omS\x90r\x8d\xe3?\xfbK\xf5\xb6<`\xea?H\x9b\xcbi\xd5\xd5\xdf?\xe7G<\xcd\x8e\xfc\xe5?.\x9a!\x01[f\xd9?^O1\xe5j\xcf\xf0?\xad\xd5u%\xdbd\xe0?\xce\xf7\xbdd\x12?\xf0?\x15\xda\xbc&\xff\x94\xf6?\xf0c\x94[2l\x8f?\x92\x00\x13\n]g\xe6?)S\xda}\x05\xe3\xe6?\xb3c\x8d\x1a\xdb\xd2\xda?\xa0/\x1fj\xf9\xbb\xe0?\n\xb9t\x08\x8bs\xe1?\x8d\xb1_\x89\xed\x1f\xf0?p%H!\xfa[\xe2?\x88c7\x88V!\xe3?\xb7K\xadQb\xc2\xed?\xce\x17\xd2\xc7iT\xea?.\xa2\x03\x16\xe3\x07\xc6?\x97\xd8\x0f\xd3\x99\x14\xd8\xbf%\x99\x97\xc2\xbfb\xa0\xbf\x87\x15\x1e\x0eRA\xd1\xbf\x96\xa9\xa0L?6\x81\xbfN\xb8N}\x94\xcf\xde\xbf\x87_n/\xd9l\xc4\xbf\xc4\xc9\xa8ct\xc1\xc9\xbf\x14\x94\x93\x1cdL\xdb\xbfw\x05\xe1\xb4Zc\xd1\xbf\xae\x85\x0f*%l\xd4\xbf\x13\x87\xf3\xfe\x03\xb8\xc8\xbf\xa9p\xf9~5\x85\xdf\xbf\x11?\xb1\x14\xb6r\x7f?{\x88\xf6\x0f\xc9{\xd0\xbf\x18\xd5\x19\xb5\xa7\x1e\xd3\xbf\x10s(\xa8A\x1c\xb8\xbf\xce\x81\x8f8\xd3k\xd8\xbf\xa4\xf0\x87HL\x1b\xce\xbf\xbd\x11\xf0\x95\x19\xcb\xdd\xbf\x19!\xaf\xec\x08\xc2\xd1\xbft\xbc\xff\x9bB\x17\xc8\xbf\xe0[\xb8\xb7%*\xce\xbf\x84\xdd.\xd9\xe6\xa0\xa4\xbf3\xbc\xa6-\xfe\xb0\xda\xbf\xc9s\x92\xba[7l\xbf\xfdZ\xed\x05\x86B\xe0\xbfKi\xfed=\xea\xcb\xbf\x06\x1a\x18m\n+\xbd\xbf\xfd\xa0\xec6\x10\x9b\xc2\xbfO\xc9[\xde\xfb\xc5\xdc\xbfM\xdeR\x17\xa0c\xdc?\x9fP%\x96Y*\x9c?\xe0\xc6<\xdc:\x0c\xbd\xbf\x05\xf8\x14\x0b\x15n\xde?u<9\xb2\xb8g\xcf\xbf\xa8_s\xcb\x85\xbd\x81\xbf\xfa\xc4\xd2C\x0fi\xdb?=\xe2\x18:;\x00\xc9\xbf\r\x0e\xa3\xc3]\x00\xcd\xbf\xd5\x05\xed\x900\x84\xba\xbf\xb4U\xb8,\x04\xd5\xbd?\x9f\xee\nD\xf0\xaa\xd1\xbf\xcaOH/\x1c7\xc7\xbf\xdb\xd9m\x8au7\xde\xbfP\xea\x15\xa5/r\xbd\xbf\xa8\x0e\x08\xdd\tJ\xb4\xbf\xdb$\xd9t\xd3\xc1\xb7\xbf\x9f\xd2OHcG\xc4\xbf`\xae\xb79d\x14\xd8\xbf\xecm\x89\x816Z\xd6\xbfTE\xe1\xd8_\xad\xdb\xbf\x88\x91v\xb2\xbc\x19\xdc\xbf\xeb\xea<\x9fv\x06\xcd\xbf\xd82\x9d\x94:\xda\xc4?\x82 xM@:\xd9\xbf\xa4Y\xb7\x11\xf1\xfa\xc3\xbf\xcc8\xc5\x88\xf6\x8b\xd1?7Q\r\xc2\x89\x81\xd2\xbft9\xcb##\xa3\xc4?\xc3uu\x0c\x91\xf3\xcf\xbfn\x86I\x97uY\x83?Wq\xbf\xc2\xc3/\xd6\xbf\x91\x15U\xce\xfe\xe7\xd0\xbf\xd9Cn98\xdc\xdd\xbf|\x8eM\xd1"m\xd4\xbf\xcb%C\x1b\xde,\xd9\xbfB\x04\x12\x87\x9b9\xcc\xbfY;\xf9\x024\xf2\xc8?\xc8\xa6\xb3\xfd\x17,\xca\xbf6\x0f\xdd\x18\x8c_\xc7\xbf\xbf\xf3\xc1\xf4<\xd1\x93?\xa0\x88\x84\x8f\xf5e\xd1\xbf\xabD\xe9I\xd2(\xe0?\x8e~\xe7\x9d\x84\xe9\xc2?o0\x1aI\xfd`\xc9\xbf`\xc1\xee\x0f\xaf,\xb8?\x17\xf0\xccX\x9b\xa3\xc6\xbf\xd6\x16&+\xadv\xdb\xbf\xee\xea>\x90\xd1\xd3\xd5\xbf\x0b\x08\xae\x16F\xd7\xd3\xbf4\x9as\x1aH\xae\xce\xbfc\x1e\x90\x136w\xc6\xbf\xd0kj\xa1\x91\xfd\xd3\xbf\x9f\xbf\x1b\xb5\xa4r\xd2\xbf\xf7\xdc\x7f\xe7yH\xcb?Qc\x93:\xa74\xe0?JQ\xe3_iY\xd8\xbf\x87\x14\x88\x8d{\'\xd8\xbf.y\xe1;:\xb7\xcc\xbf\xb0\x84\x94\x08\xf2\xce\xce\xbf\x82\x98\x97\xedy\x14\xc2\xbf\xa8\xbe-\x9e\x96\x1b\xd0\xbfJ\x02L\xd8\xdf\xca\xd0\xbf5\xed\xd7\xb4\x11\xdb\xd2\xbfRQ\xb1\xa5D^\xba\xbf\xf3I\x14\x8cg\xa0\xb5\xbf\xd2CY\xb8\x17k\xd8\xbfU\xea \xfe\xe4F\xd0\xbf\x1d\x90io\xdf\x9f\xda\xbf\x97\x0e\x96e{,\xcc?_C-\xf7\xb6&\xbd\xbf\x1e\xe7\xfb\xc9s\xca\xc1\xbf0\xb0\xee\x15\xeb\xef\xd1\xbf\xcd\xd7MM\x1d\xc8\xce\xbf\x96P\xb7Ws\x08\xdb?]\xc4\x14\xea\x90\x80\xdc\xbfG$@\xf6A\x82\xe4?I\x1d2\x90\xe7^\xc6\xbf_\xc0KC(g\xc6\xbf\x9f\xe8\x93\x81\xe1:\xda\xbf\x00\x1b\xca\xcd\x85M\xca\xbf\xec -\xfd\x83E\xda?\xa2\x16-F\x1d\xa6\xd4\xbf=I^\x1b\xe3\xa6\xc6\xbf\xdb\x1dJv\x81W\xcb\xbfthu\x1c\xd7\xde\xdd\xbf\n,\xe9=t\x94\x93\xbf\x99\x10\x93\x80\x07\x10\xd0\xbf\x00\xe9$\xb7\x1c{\xce\xbf\x1e\xa9\xe86\x03u\xc1\xbf\x03<\xbc\x01\xed\x14\xa6\xbf\x04\xa4\xff\xad\x13n\xdb\xbf5\x00"\x96\xed\xbf\xd0\xbf\xf3\x82\xca]\xd23\xd6\xbf\x9a|\xa8[\xd8\x0b\xae?\xdf=\xa5E \x1d\xc3\xbf\x03!a\x14\xcbI\xcb\xbf\xb3\x05C\r\\\x88\xc0\xbf5\x0c\xc6Q\x05k\xe8\xbfK\x82U\xe3\xbe\xa3\xb6\xbf\x07\xf6\x8b)G\xc6\xce\xbf\xa5\xc3\x18\x80]a\xe3\xbf#!ze\xa8z\xdf\xbf\xafd\x12+\x16{\xd4\xbf\x82\xf6c\xc5\xd9v\xc9\xbf!\x9a\x8bp\xd4\x18\x9d\xbf\x06\x87s\x94*E\xbf\xbf\xd4\x00\xf5\xfe\xb6\n\xe1\xbf\xe2T\xb7 \xa2\x99\xdc\xbf\x8ao2\xa4\xe7\x05\xd1?\xe8\xb7\xf7\xe0\xb3\xfc\xe0\xbf\xe5\xaaP\xa0\xd50\xd6\xbf\xc4\x91\x1b\xd8\xe5\x06\xd9\xbfO\xcd\xfc\xb9\xc4C\xdc\xbf\x82L\xc1\xd7\x13\xbb\xcc\xbfV \x8c\x0e\xe4h\xd3\xbf4\xf7\x8ap\x8d\x9b\xc4\xbf\x02\xa7\xf7A:\xbb\xda\xbfq\xc0(\x1bY&\xef\xbf\x0b8^\x1c!\x1c\xe0\xbf\x8f)\x06\x9c\x0f\x0f\xd9\xbf\x90\x8b\x15\x12dP\x9d\xbf\xac]\x16\xe6i\xdd\xdf\xbf\xe5\xe0\x05\x91\xda\xc7\xb8\xbf,I|\xea\xde\x11\xe3\xbf.\xf8\x84\x83\x8c2\xe2\xbf\x98cf\xc37<\xe3\xbf\xec\xb1.\xa7\xfc\x0c\xd3?\xa0\x07\x18K\xf9\xcc\xd9\xbfm\n\xd5@\x01h\xdc\xbfb\xe5\xa2<{\xfb\x95?)!\x08Bb\xb3\xe0\xbf3\xf5Q\x8elu\xe0\xbf<\x08\x13\x91u\xd3\xd9\xbf%\xbb\xc6Z>\xb7\xda\xbfN\xc4\x05\xbb\xa5\x08\xe2\xbf\xd6{9\xa0\xdfd\xd5\xbf\x17?p\x1d\x17z\xb5\xbf\xe6Q\xc0\xc2\xd8\xc0\xe0\xbf\xechS\xe1\xf3\x9e\xe0\xbf\x1d\xeb@\xfa\x0eH\xd5\xbfI\xc4\xf2\xbd6\xb7\xd7?\xca\x17!\xbbm\x8d\xd3\xbf\xcbE\xb7|s\x1a\xdc\xbfJ\x7f\xaa\xe5\\\x11\xd7\xbf\xd0\x86\xd9b9\xf3\xdd\xbf\xc4tk\xb8%\xf1\xe5\xbf\x83S\xf4:Q\xe7\xd5\xbf\xd5\x15I\xcf\xe7\x8a\xea?\xc3J\xc4\x18i\xc8\xb3?\xf4\x95\xe3\xba\x08\xad\xd0\xbfq \x15\xa7\xb1\x07\xe5\xbf9\x05\x11\xa8\x91\xd8\xc8\xbf\x1f\xf2\xe8\x15\x96.\xe7\xbf\xcb\x8d\xcf\xa3#b\xe3\xbf\xcf\xd0\x9d0PO\xb7\xbfGZ\xdb\xcdj\x1a\xeb\xbf@\x1d\x90(\xfb\xaf\xdc\xbfK\x07\xc7X{\xcc\xe0\xbfU\xc4\x9c\xda\xe2\xc8\x9c?PA\x90=\x9a\xbe\xdb\xbf\xc9\x83 :\xed\x02x?b\xe4\xe5\xf5>\xe1\xd9?+UT\xed;\x11\xf0?\xaf\xaf\x95\xb5\x86\xd9\xdc\xbf\xf9\xb3\xdd\x8e\xf3\xd4\xd9\xbf\xeb\x89\x93 \xea<\xe0\xbfpP \x89,\xc5\xd7\xbf\xd2\x1d`[\x90\xad\xe2\xbf[\x94A\x00+\xb5\xd5\xbf=\xb8\xaa \xee-\xd1\xbfR\xc0[\xbf\x7f\x83\xce\xbfj\xc4Q\xbb\x08p\xdf\xbf\xf7\xcc\x17\xe5<\x8b\xde\xbf\xd6\x97\x12\xb1\xa0a\xd4\xbfQ\xa9\xa1\x02\n\xa1\xdf\xbf\xe3\x91\xd8+*\x00\xe5\xbf*\x9e\xaad\x0b\x97\xd5\xbf\x1aF\xf81\x7f\xd4\xe0\xbfJ\xf7\x0c\xfe\xd3\xff\xdd\xbf%\x9c \x88e\x10\xdb\xbf\x1d\xfa(y\x01\x8a\xdc\xbf\xbc\xed\xae&]\n\xd0\xbfI\\\xe4\x9a\x1b\x93\xc5\xbfM\xe2\xa1\x1cWs\xdd\xbfN\xc5\x9f\xc5\x95\xb8\xb5\xbf{\x96\x898\xcf\xe4\xe0\xbf\xf3\xcc\x1f\xfb\xd1\x9c\xc9\xbf\xad\xc5\xb2\xd7\xa5\xd3\xd2\xbf\x81\xa1`\xf6\xf34\xd2\xbfF\x84\x97 Q\x9c\xce\xbf3\xae\xea3\xb1\x18\xd9\xbf\xfe\x15nc\xf8e\xd5\xbf\\.#\x04\x04\x0b\xd8\xbf\x03\x0c,\xd9\x04\x9e\xc4\xbf2;\xd7\x12\x94%\xe3\xbf\x10\xba\x1d\xf8\xaa\xa7\xe2\xbf\xc2T\xd73\xed:\xd4\xbfFL\x87\r}\xf5\xe6\xbf\x88\xfa\x9f\xa7\xc4\x1a\xd8\xbf\x08q\x90c\xa9\x91\xd6\xbf7\xefv\x1d\x08\xa6\x91\xbf\x0bK\xcf\xfa\x9d\xa1\xe1\xbfi\xa2\xe6\x83\xfd\xb5\xb1\xbf\x14)\x8d&Z\x8e\xd6\xbf\x8c\xed\xf7g\xeb\xf8\xc1\xbf y\xf3\x1b\xd1\xe8\xe1\xbf\xcd\xb7\xbaO^\xc4\x93\xbf\xa7\xa4\xc0\xc5\xfb\xc5\xd2\xbf\xd5\xbe$\xc1\x18\xbc\xe2\xbf)\xe29\xf7\xaaJ\xe4\xbf\xb3\xee\xd3\xf4A \xd2\xbf\xfd\xfb\xe4\x8bRS\xe1\xbf\xe3\xc3\xe0\x13?\x89\xd8\xbf\x9a%\x00\xe8\xbdq\xa5\xbf\x0c?\x15R\xbb\xec\xcc\xbf5\x07\x0e\xaf\xcb\xd8\xc7?YG\xd4$3\xb6\xa9?\x1b6r-\xdb\xd3\xdc\xbff*\'S\x10\x8a\x99\xbf{`\x85\xad\np\xde\xbf\xaf\x00P\xbd\xc9\x8e\xda\xbf\xd9\xf83\xcai\xa9\xc8\xbff\x12\xfe5\xa7\xa1\xe3\xbf\x8bs\x14\x14\x941\xdb\xbf\xde~\xedM\xd2|\xc8?\xf2\xc4:b\xcc[\xdc\xbf\xce\xbe\x07\xc5m\x83\xbb\xbf\xec\xd3!\xf2\xf1.\xa3\xbfu%*\xf9\x12_\xd4\xbf\x10\xcfn\xdb+o\xde\xbf\x03\x9b\x82\xd0\xf2y\x8d?\x185@\xc6T]\xc0\xbf~\xab\x06\xa2\xa0"\xca?\xc2\x07\xe2[\x88\x13\xb1\xbf\n\x08M\xa5\x04\x0e\xd4\xbfO\xc1\xb2\xc8\x92Xe\xbf\xe3\x11e\xafK#\xd4?\x93]\x9e}\x19\xde\xd5\xbf\x00\x06X\xb5e\x91\xce\xbf\xea\xf5yR\xb2\x15\x91?\xcf\x9eE\x14\xa3x\xd4\xbf\xc7Cy\'\x8fW\x8c\xbf\x80\x82e?\xe2`\xae\xbf_\x14W\xbd\xd5i\xaf\xbf6\x9d\x85_\xd3\xe6o\xbff\xb0T+\xa3U\xe3\xbfN\x1d\xef%\x14\x0e\xcc\xbf\xb8\xe7lc"\xc1\xd2\xbfz\x90\xe6\x8b B\xc8?\xe9\x99<\xab\xbd\x1e\xd8\xbfL\x06\xc8\xa0nT\xa8\xbfH\x9e{7\x91\xa0\xd8\xbf\xb7NJ\xdd\xa4\x98\xd0\xbf@>K\x85\xf9n\xcc\xbf\x14\xe2\x9e\x01"\x91\xce?$*\xe3\xd3]\xaf\xd8\xbf5r\x1c*\xe0\xb6\xd2\xbf\xc1m\xdbm s\xcc\xbf\x97\xca\xe1~\x1f\xa3\xd5\xbf\x94\xe4e\xc5\x87F\xd5\xbf\xfe\x11(\xa3\xea\xd4\xc6?4R\xdb5e\xad\xdb\xbf\x0cQ\x1b\x14\xb8\x01\xcb\xbf+\xc8\xa4\x93\x88Q\xca\xbf[U\xcc\x07\xea@\xa3\xbfQ\xb9\x7fkM\xae\xd7\xbfe\xe1\xa5\xc9\x86\xaa\xab\xbf2\xe1\xaes\n\x88\x97?\xacQ\xa7Yu/\xe2?\x99\xf9\xba\xa9u\x0b\x9a\xbft\xb2\xc2#\xf39\xca\xbf\x8d\xf0l\xc9\xb3\x81`?\xfb+"\xfbW\xb3\xd1\xbf\xa50\xd6\x818\x8b\xd7\xbf&\x04\x00\x9a\xec\x14\xa7\xbf\xe5@\xd7\xc8\xf5Z\xe3?\x89\xb9\x88\xd2\t\x0c\xc3?\xe8i\xe4">\xc4\xc6\xbfU\xc4\xa6\x85\xd0\xea\xd8\xbf\xbf\x89\xa3\xdbdE\xc4?\xa8Q\xf7j=\x7f\xe0\xbf<p\x17\x18\x06\xf3\xe1\xbfZ7w\xc0F&\xcb\xbf\xb0~m\xf2\x1d>\xe5\xbfq\x90\x1e^\xdd\x10\xc3\xbf~\x99\xb7\x98\x8fe\xd0\xbf\xa8\x9a\xabai\x9c\x82?m_\xe3\xb1H\xae\xb1\xbfR\xc8d\x9e\xf2\x0c\xc6?\xd2\x1e,\xdb\xd4G\xdc?=I\xe5\x7f4\x05\xeb?\xa5=\xccG;W\x83\xbfY\x06.\xdf\x1d6\xac\xbfg\xeb\x81\xb5\x93u\xca\xbf\xf8\x18!D\x85\x14\xb1?})\xe2#\n\xb7\x9f\xbf\xde\x84\xc5X%j\xc3\xbf\xb0\xf5;\xcc\x8e\xcc\xcb\xbf\xbd\xfd*\xea\xbbT\xd4\xbf\xaa\x9bp<"R\xce\xbf\xf0\xb6&\xb6-\xca\xd1\xbf\xf4\x14}<\xb1\xe7\xd9\xbf\xd0\xa3\xb5\xcb4\x0e\xc5\xbf\x86[\xc6)*Y\xcc\xbfWG\xec4\x8a\xea\xbd\xbf`J\xfcZ\xd6\xaf\xda\xbfr\xc7\xe4\x80a\x12\xa8?G\xf8Vl\x87\xd5\xc9\xbf\x92\xb3P\xe7\x8et\xca\xbf&\xa4\x9a\xb8v\xf0\xce\xbf\t\xaeV\x9a\x079\xc9\xbf1\x9f\'-\xd0\x8c\xbc\xbf\x1f\r\xb3\x80\xdeH\x8e?\x87\xb2\x9c>F5\xb7\xbf\x1dh\x1d\x8a\x85\x82\xaf?l\xd1\xbaR\x7f\x0c\xd1\xbfO#\x94\x89\x86\xfc\xc4\xbf6 =\xfb\x9a\x03\xb9\xbf\x8a\xff\x12zBw\xd1\xbfw\xab)\x86z/\xc3\xbf!\x9e9\xc2\x01\xc0\x9d?r\xf5\xe6\xc6\xaf\xa1\xc6?\x7fY\xde\x00\x15\xdc\xd4\xbf/b>\xe9E9\xd1\xbfJ~\xf2:J2\xc5\xbfO:\x05\xa4dR\xc0\xbf\xf2O\xdd\xae.d\xb9\xbf\xe4\xf4U\xc5V+\xca\xbf\xc2\xfe\xc9f\x81B\xa1?\x96i\xf7\xa3\x16\x05\xe2\xbf\xd3/p\xe8?\xb8\xc8?\xd3\xb3\xf1\x94\tU\xcb\xbf\xb0\x9a\x88\xf8\xef\x00\xd7\xbf\x905\xc3\\b\xe1\xc6\xbf\xe2J\xbfp\xcd\xff\xc7?\x85q\xcbI\xcd\xb2\xc8\xbf\xb6\xee\xf9\xe0\x8b:\xe0\xbf\x04\xdcQ\xd3}\xf3\xcd\xbf~+\x10\x92]\xcd\xc0\xbf\x8f\xd5]\xfd\x89\xe0\xd3\xbf\xe3\x19v\xb1\'\xa0\xc7\xbf\xb0|\xe2\xf4\x80L\xc4\xbf\xa0\xe2\x1du\x01\xe2\xb4\xbf\tc\xc9f\xb6\x10\xb1\xbf\x9ba^\xa9\xf2\x81\xb3?7A\xaa\x0c;\xca\xc8\xbf\x1aq\xd9\x19\x1f\xc2\xbc?c*e\xb2+\xbd\xd6\xbf\x8b8\xf2\x16\xb8\xb9\xdd\xbfX\xd2n\t\xae\x11\xd9\xbfr\x03N\x90\x0c\x05\xc7\xbf\x98="\x06\xed\x14\xca\xbf\x18\xe2\x19\xc2\xa8\x97\xa5?|\xe0O\x92\xe1\xc7\xc8\xbf\xff\xcf\xcc\r\x80+\xcb?g\x05\xec\xaa\xed1\xd1?=\xa9\xe2\xdc\x1b\xc4\xb5\xbfi3\xbc0\x80\x04\xcf?z\xaa\xed\xa1\xd48\xd0?\xe6m\x82(*\xdd\xc6?C\xb5\x9a\xc6y\xd7\xe4?\xe5\xca\xad\\\xb1 \xe1?i\xb8\xb4\x034\x1fy?\xc1/\x96m\xadA\xc7\xbf\r\x18:/\x08]\xf3?\xd6\x1a\x96|~\xb1\x92?\xd0\xcd\xd9\x8f\xfe{\xe7?\xc1_n\x07\xf7:\xc3?\xa0\x88{&C\xe5\xc1?\x9b@e\xf5^\xe7\xcc?T\xbeG\xd2\xcb\xf5\x87\xbf\xe1@\xb8\xa9\xdb\xf4\xd4?At\t\xc9\xed1\xbc\xbf\x9a9J_\x07\x80\xd6\xbfgd\xf2\xa1\xe4,\xa7\xbf\xc6\x8cdN\xf5P\xad?d\xd3\x97b\x97\xc7\xed?C\xb7\xf8\xcbjH\x94?\xb5\xa5i\x84\xa6\xfd\xd5?n\xc5\xd0\xc5h\xf7\xae\xbfX+}\'-s\xdc\xbfC\x9b\x97\x99\r\r\xbe\xbfx\x04\xcf\x82\x979\xf2?~\xc7$%\xfb\x8d\x9f?H\xebk\xc9NQ\xc6\xbf\x82\x00-\x19\xd1\xfe\xca?\x93\xc2o3\x84T\xab\xbf\x14\xf6\xdd\xeff\xff\xc0\xbf\xeb\xbd\x82\xadi.\xb3?\xde\xa7\x9d\xadl.\xb0?<1\xe8\xe4\x86\xdc\xb0\xbfs\x0b\xe3`\x81\x9d\x90?\x1b\xf0\x0f\xbbBM\xd4?\xd6&\x0b\xbc\xb5v\xde?\x80A\x12y\x03\xeb\xb5\xbff\xa0{\xa3D\xa4\xc3?\xf4~\rS\x94\xf6\xe9?\x0e\xef\n\xfd\xab"\xb1?\xb6<\xd0\xd8GM\xc3?\xc55%&;f\xd1\xbfQ\xd3\xb7|5;\xaf\xbf\xf7\xf6\x98\xc5\xb3\x9b\xd0\xbf\x17>\xb7\xb3\x1cX\xbf?,\xd7\x10\xe9\xcb\xb9\xf3?J\xd2\xdd\xb2\x95\xe8\xe0?\xa4F\xb3\xdf.\xa9\xdd?\xc8TR\x9f\xacs\xc6\xbfZ$}C;c\xd8?\xa2\xc8z\xd4\xa3?\xcf\xbf\x12Y\x9b\xea}R\xda\xbfV\xd1H~hj\xc7?L:\xf1\xd0\xbb\xbf\xca\xbf\xf3\r\xddn\xadr\x98?\x04j7\xbb\x9e\xc6\x9c?\xef=i\x8a(9\xe4?!u\x1d\xb0\xd2\xa9t\xbf_QF\xc5u\xa8\xee?\x87\x1c$\x14\x14\x8c\xe5?Q\x9d\xfa4\xa6r\xf6?\xe9*\x96%\xd8\x04\xdb?\\\x8d\x1b&\x18\xb1\x8f\xbf;_NtT\x7f\xb4\xbfw\xec\xfdl\x0c\xc8\xaa?\x1a\xfa\xfd \x1c\xe9\xaa?\x9f\xed\xd6\x9aV\x18\xc5\xbfw|\x18V\x05\xa0\xc1?\x8f,\x10\xaax\xc6\xbd\xbfI\x03\x01H\xbf\x1b\xb3\xbfU\xc0\x1f84a\xc2\xbf}\xd9\x9f\x9a\x95\x16\xcf?=\xd7\xc1Ys]\x9b\xbf\tO\x16\xb5\xc23\xd4\xbfl\x08\xee\x14N(\xae\xbf\x9b\xf3\x99\x11\xfa\xf7\xca\xbf0\xdf&b\xccC\xb5\xbf/?\xe6\x07\x01\xa8\xae\xbf\xc9\x0f\x0bW\r]\xbe\xbf\xc8\x1eq\xcb\x10\xd6\xa5?a\x19EF\r\xb9\xb0\xbfm]/p#1\xb8\xbfd\xfb\xf2#\xaf>\xde?\xa5\x9b\xeb><\xd4\xd4\xbf\r\x8d\xb0\xa2\xf1\xb1\xc3?\xd7p\x9f]f=\xdb?slFF\xfd\xbd\xcf?2\x89oO<\xe0\xd1?\x7fU\xa4\x16`\x92\xbb?\xca\x13R\x93\x1a\x1f\xd4?\x82\x7f\x04\xc0\xd0)\xb0?\xf3\xdc\xb4[bg\xdd?J\rHN\xf7\xa2\xd4\xbft2\xd2q,)\xc4\xbfW\x84\x84\x0c\xd7\xc8\xbe\xbf,av\x08?\xee\xd9\xbf!\xa8\xc2\xed\xa0\xa1\xd5?m\x05H:\x03\xa4~?\xe1\xdd\xaa\\\x12A\xbe?\x8c\x15u\xff\xe7o\xbb\xbf\xa2g\xd4R\x1a\xfd\xe1?\x91\xfb\xdf\xc5\x1e\xd7\xd6\xbfU\xc4*\x13\x9c\x92\xd5?\xcd\xefd\n\x87\x93\x95\xbf\xba%\x16[\xa6\xae\xd8?\x9aG\xa7\x14\x87\xd9\xd2?\xf4\x96c\xa6$N\xce\xbfb\xbd\xe0\xf8\xad\\\xdd\xbf w\xef\x9b|\xc9\xc3?(U\xb0;\xb9\x0e\xd2\xbf\xfc\x8a\xa5T\xf7\xeb\xcb\xbfUa1SKK\xe1?*\xcbM\xb3\xe5\xf7\xcd?\x96\x0ek\x169\x1b\xd6?{"\xd3\xa0\x93\xc0\xd2?\xcd\x81!\x89\x18\xb1\xd1?\xf8I}\xe2\xa0\x1d\xdf?\xdd\xd7E\xe4\xeft\xc7\xbf\xb3\x90\xea|\xa5\xd3\xc1?\xf2\xe1ew\x82k\xb3?%\xc8\x02\x1aE\x8a\xe0\xbf\x8e\xf1\xc4\xe9!9\xce?\xb1?xBM\xcc\xe4?Qc\x8a\x19\x8e\xde\xb0\xbfNp\xa4\x0cb\x8a\xd8\xbf9>M;\xecO\xe3\xbf\x19P#\xa5\xba\xf1\xcd\xbf\x00b\xf7\xcc\x88y\xd6\xbf\\\xb8\x85S\xd10\xe3\xbf\xc2\xe7\xfa\x9b:\x16\xcd\xbf\xb7\xe9\x02i;r\xe4\xbf\xd2\x99\x16\x1b\x07\x94\xe1\xbf\xfcm\xa0\xc9\x83%\xe1\xbf\xa8d\xaa\x86r\n\xe6\xbf)\xccA\x94\xbcH\xdd\xbf\xda\xe7\xa6\xc3\xc4\xbf\xd9\xbf\xcd\xa1A\xcc\x13\xb1\xce\xbf\xba[\xff\xf0)~\xe7\xbf\x8fN\x86\x9b\x1c$\xe0\xbf:\xca\xa1a\xb0<\xe4\xbf\x97\xe9\x11&\xde\xab\xe5\xbf\xa4\xb6\x03\xa9\x0e\x9b\xdd\xbf\x80\xe6i\xd5Z;\xe5\xbf()\x8e\xe7\xd4^x\xbfT\xca\x06\xea\xdeh\xd7\xbf\x91\xcdr\xa0,\xf4\xc8\xbf\xf5\xa9q{\x80\xea\xcc\xbf\x87\x1f\xe9\x80d\xa2\xd9\xbf\xe7\xc6\xcc\x9bF\xcb\xde\xbf\xeb\xbb\xcey\xae|\xd5\xbf\x02s\xab\xfd\xca\xf8\xdf\xbf\x17kh+Nb\xe3\xbf\xda\x16\xdf\xf8\xd43\xdc\xbf{\x03\xa1\x93\x92\xa8\xd8?\xf1;J\xc7\x1f\xb6\xad?i\xff*6\x9c\xf7\xd7?G\xe3T\x1d\xfa\xcd\xd6?8E\xb6\xe1^+\xdd\xbf\xa4+(r\x81E\xc5\xbf\xd8\xac\xf5\r\xe8D\xe1?\t\xeb\xa8N\x06\xf4\xe3\xbf\x01;\x83\x16\xf8C\xd1\xbf\x80\xd6q\xac\xb3\x07\xd8\xbf\xe8\xbe/\x1e\xfe\xef\xba\xbf\xcfNv\x04\xff\xa3\xe6\xbfZ0\xa3\xcep\xee\xe0\xbf\x83\xa5\x97\xcd\x90\xc0\xd0\xbf\xc0iT-\xe9\x81\xe2\xbf\xb7jr$\xab6\xd0\xbf:\xd8\xd2\xc6\xb1U\xe4\xbf\xc8\xb0m\xa5\xf1\xf8\xe2\xbf\xa5\xa68\xe0\x03\xc0\xc3\xbfU\xf8\\\x9cU\xad\xe7\xbf\xfa\x15\xa2xQ"\xdf\xbf\xec;1\x1aT\xbd\xe3\xbf\xae\xfa\x16\xe4\x04\x15\xe0\xbf\x90%\x97`k\x98\xb5?\xba`c\xf4\x1bW\xe5\xbfe\xa5\xbbR\x8e\xf4\xd2\xbf\xaal\x1ce\x12\xae\xe0?\x13\x04Qk\x9f.\xa9?\xb0\x1aVOr\xa0\xcc?;\x10\xc3I\xa1\xb5\xe0\xbf\r\x8f\x87\x98\x97\xdc\xdd\xbf_QS\xc3\xfac\xe1\xbf\x95\x904Kp\x1d\xe7\xbf\x1f\x17\xb9(jd\xd9\xbf\xab\xbd\xdfK"\x19\xd9\xbf\xb9U\x90c%\xbf\xdf\xbfCm\xf3\x90\x1e\xd2\xc5\xbf1\x9d8{\x1d\x9d\xc8?\x8d\x8c\x1c\xd9k\xc6\xd6\xbfoUsR\xac\x82\xe4\xbf\x92#\x8b\xf4\x16I\xa5?\xb6\xdf\x12\xf1W@\xe6\xbfr5x\xef6@\xd9?\xfe\xb3\x81\xd5\x07u\xd1\xbf\xebE\xe9\xab\xe2:\xdd\xbf_[s\x1b\xc2\xd4\xcf\xbf\x98q\xc0\xb5}\xd2\xab\xbfAa\x85\xda\x7f#\xc6\xbf\xec\xa6\xfbO\x85$\x97\xbfP\xb76Y\x06\x03\xe7\xbf\xc6E\xa3\x8bs.\xd6\xbffS\n\xc8\xdfz\xe5\xbf@\xd5\xd3\xe2\xdet\xd5\xbf\xce\x9bD\xcc:\x8e\xe3\xbfYQ"\xdc\xd2\xab\xe1?I\n\x99z6\xe7\xe9?\xf0\x15\xba\x9dr\xe4\xdb\xbf\xc5\xbf\xc9\x8e\xdc\x88\xe2\xbf\x08\x1a;\xe1\xf6>\xe5\xbfv\xd7\x02\xf4\x19\x17\xde\xbf\x01\x02E.\x99\x07\xc0\xbf\xa5\xea\xabxg\xef\xd6\xbf\xdb\xcf\x88\xb0\xbc\xcc\xe2\xbfL\xd9\x91\xb8c\r\xdc\xbf\xe8\x1d3\x1e\x14H\xda\xbf@K\x15B/Z\xe3\xbf\xb2\xd1\xf8X\xa9\x1f\xe6\xbf\x0e\xfb*\x83\xf4{\xe1\xbf\xc9\xbc\\\xbb\x9e\xa0\xe1\xbf<\x06\xd3j\xce.\xb2?\xea\xdb\x88wS\x00\xe5\xbfz/6\x16\x99k\xe1\xbf\x18\xc5\xbb9\x1aX\xd0\xbf\xc25\xcc\x03v\xe0\xba?\x9dT"\x8e\xa5\xa4\xdf?9\xc5\xf4\xfd\xbb\x88\xe3\xbfZ\xc0E\x8e\x00\x0e\xdc?&\x1a\xe8\xf8\x146\xcb?T\x1c6sH3\xe4\xbfk\x91\xd5\xaa\x91\xd7\xe6\xbf\xa4\x97\xbc\'\xd9\xd9\xe0\xbf\x94x\x01\xf1\x81v\xe6?\xff\x91+V\xff\n\xa6\xbft\x87\x07\\\xfe)\xe1\xbf%\xe3\xb2\xe5\xb2Q\xe2\xbfm{.&\xdb6\xd6\xbf\xc9[\xb0H\xace\xd9?^\x02l\x06J\x12\xe6\xbf(\xc0\x10 \x9a=\xde\xbfx\xa4\n\xb9\x1fB\xe1\xbf\xff4 \x1a\xba\xa0\xd9\xbf\x00\x9b0%6}\xe6\xbf17\xd0{\xfb\t\xde\xbf2N\x8c\xe5SY\xdc\xbf\xf3\xb1\x9e\xb7l\xff\xcd\xbf\xaf\x9fX\x8e#~\xe2\xbf\x07wY\x8c\xc1g\xe0\xbf\x86\x10\xc8\xf4%\x89\xcf\xbf|\xbe\xaaX\x12\x94\xc2\xbfQ\xf1\xfax6\x87\xe4?Y\xa5\xcak\xb3\xd0\xdc?\xd9\xa9\xf5\x0e\xf7\xa1\xe1?\x9d\xd6\x1c\x8c\'\x90\xd1?\xfdt\xe5=\x19\xc4\xe6?S\x83\xa3\x9d\xc6Q\xce?F\x9f\xf6\xc3+\xb1\xcc?w\xab\xa5.\xb4\x08\xd7?\x0e\xc12\x96  \xe1?\x90\xd06\x11sg\xf3?s\xb4\xb9\x1c\x11\xc1\xdb?{\x13\xef\x9a9$\xe9?\xbc\xd4\xf6c\xbfN\xe1?\xe5\xe0\x03#H\xfe\xe7?Rb\xd0\xebE\x08\xe4?$\xe4\xb0\xd4b?\xe8?y\x8d\xe7wHy\xf3?\xfd}\x89\xcc)\xe5\xd2?\xfd\xeaG|:\xfb\xf1?)PO\x1f-P\xa4\xbf\xd3\x0f\xa1\xaft\xf7\xea?\xe0"6\xf0X\x17\xd9?\xe0\xd7\xce\xcf\xc8\x92\xdc?\xcc\xdc\x12\x05\x17\xa6\xe7?\x91\xb5a^\\[\xd8?\xf5N\x9b+X.\xe9?\xcd\x9c\xd5$G\x0e\xf8?R0\xfe\x0f\xe8\xc5\xf0?\xec\xe5f\xe3v8\xe2?\x02$\xcf\xb6\xcdo\xc1\xbf\xae\xfa*OW\xa2\xe8?\x1d,1\xdek\x88\xe7\xbfQ\x85j\x00&d\xa5\xbfw\xf0\x82\x9cR\xca\xef?\xe6\xd4\xb4\xbe\t\xfb\xdd?\x81\xde\x0c:U\xc1\xd6\xbf\nV4\x0eu{\xee?\xb6\xb3\x88Y\x86B\xbe?:\t\x06\x14f\xe9\xe1?\xe3\x1c\xb4\xc8\xa0\x12\xbd?a\xfb\x98\xd5S<\xed?*\x92x%\xd0\x86\xe4?\x94\xec3\xc6\xe5:\xaf?#,\xcc\xa4\x94\xc2\xf0?\r\xce47YIf\xbf\xa7\xd81W\xbeI\xf6?\xb6\xdcf\x14^\xe6\xe6?#\\\xeb\xca\xe6\x0f\x9c?\xc5i*\xf3\xde\x85\xe7?\xd6\xcd\xc8\xa4\xd5\xf6\xe4?\xe0\x18_=\x12Y\xd3?1\nN\xbb#8\xd4?\xd2\xe38\xde\xb4\x04\xe0?l8\x0cE\n1\xdf?\xe1\x00\xbb\xcb\x83\xf1\xef?\x9bF\x0cx\x16\xca\xd4?|\x8e\x1bV2\xe6\xd0\xbf#2\xcd\xdd\xfc\xe8\xa3\xbf\x19\x92[\xe0G\xbe\xee?\xebuK\xe5\xf9\x0b\xe8?\x95\xa6\x03\xb2\x82\xe3\xd3?-\xe4\xf6\x17,|\xec?\x163e!\xb1T\xe7?4\xd0\xc6W\xcf\x99\xe7?`Ga\xd4\xa2F\xe2?E=\xd6\xa4.,\xcc\xbf\x00\xc8\xf2>\xf9\x83\xcc?\xf9\xa1\xe0\x95\x9bn\xea?\x95\x8b\x96?B\x98\xef?X\xfch\x13\xfb\x04\xb4?\x8b\xd9\x87\xd0\x95\x8a\xea?\x93\xf0\xd3\xd2(G\x94?\x95~\xa7\xad\'\xe6\xe8?\x9e\x1f\xb6\xb9\x81\x9e\xf0?\x99\xc1\xa2=\x89\x1f\xe4?7*\xf0\xaf\x8e#\xc7\xbf,\xf5`\xcd\x12J\xd3?\xe2;J\xd1=0\xdb\xbfTs\xcc\xb5\xd5\x99\xee?\xa4ko\xc5\xf9\x9a\xee?3\xfe_\xed\xbc\xbb\xf0?}\xae\xed]t_\xd6?S\xa0\xba>W\xbc\xf1?ZHj?\xde\x13\xe0\xbf\xe4\x10\x90\x0f\x1c_\xe1\xbf\xbeV\x92W^m\xe1?Qkv\x86\x15\xc9\xcf?\xe5#\xa5\x17\x06\x19\xf4?\xe2\x92!\xf1\x8a\x06\xea?v\xb3cy\x15\xc7\xd1?\x17\x81\xd2Rg\xce\xe4?/\xe8G!\xdb\xf4\xe1?\x03Z\x0c\xad\xf6W\xe8?\xe7.\xb0\xe4\xdb6\xcf?XD\xc8\xc1*p\xf0?\xe6\x1f\xa6\xa7\xdai\xda?;\xa1\x8c\xeb]W\xea?\x13\x1e\xb6\xbe\x8e\xc4\xe1?\x05\xda\xa6e?\xe5\xe2?\xd2D\xa0\x152\xd2\xf3?!\xb5\xa2\x9a\x9c\x0b\xdf?\x98\xb7\xc8%\x87\x7f\xbf?\x06a\xa8o\xce\xf0\x9b?\x11\xb7\n\xa0\xe49\xd0\xbf\x1a\xd1\x93\xcd\x0b\xc0\xd1?\xf9U,\xcc\xdb)\xd9?\xce>\x82\xbc\xc3U\xd8\xbf\x81\xcco\xac\x18\xc1\xef?:\x9b\x1c\xb3;\x87\xe0?\xb8\x1c\xcb\x12\xac\xec\xe1?\'>\xaf\xe8\x8b9\xd4\xbfQ0T\x00\x9d\xf9\xd9\xbf,\xbb\x95\xd8`E\xe8?\xa5\xaby\xf9\xa3?\xf3?\n\xd8\xde\xdc\xd3#\xd1?jS\xbd\xc6\\\xd1\xe1\xbf\n\xc7\x92\xd1\\5\xe7?\xa9\x91\x9d\xa5K\x94\xe6?\x15J\x14\xb1\xb7B\xe9?\xb5\xee\xbe\x83\x8c\x0f\xe0?\xab\xaa=\xab`+\xda?b\t\xc5XC\x1e\xf0?Q6\xba\xc4j\x17\xd3?\x0b\xa9\xca\xd5\xf6L\xe0?pg2]G\x10\xf6?\xf0\x84_#\x1fn\xe0?\x9e{\xbd\xf7\xf4\xf5\xca\xbf[m\xe0\xbe#\xad\xda?d\xdfy\xf7\xc2>\xcd?v\x1e\x98\xe5\xf6\x8a\xcb?O\x9c-\xa9=\xc2\xd2?\xae\xb5\xf9\xb6\x02\xae\xd4?\x87\xc5\xe5\x8dgu\xd1?\xd0\x83<\x01%8\xd9?\xa9\xab\xab\xc4\xb5\x98\xda?-\x1c\xf8\x05\x8bf\xdc?\xca\xf8\x10v\xac}\xd4?\xc3f\xc2\xb6\ts\xb9?\x8b\x06\x04\x8el\x9f\xd1?\xad\x95\xea\xb72\xca\xd4?\xa4\x9a\x92M?]\xd0?\xf2\x19>\xba-\xb1\xcf?\xc7\x05q\xac\x1b\x00\xd5?\x81\xc5\x06\xc4\xb3:\xda?\xdbh\x02\xa3F\xcf\xcd?\x0c\xac\xdc\x889A\xe6?d\x022\x99\xa7\xb2\xd2?\xa5t3!\xed\xec\xd6?<\xa4nA&\x16\xda?\xf4\x91\x98\x91\x8f\xda\xd7?\xfa4E\x9a*\x05\xdf?:g\xca\x08P\xfd\xd3?\x0f\xceZjr\x1c\xe6?\xddn@y8\xad\xe0?\xfb)\xc4\xc2ci\xce?\xcf\xab>%\xd0\xf5\xd4?\x9e\x04\x96^X\xb5\xc6?B^ \x93}\x9c\x90\xbf\x0c\xdf\x10\xb8\x81\x9b\xda?&\xe3e\x17\x17.\xb8\xbf\x9f\x1eu4\xcf\x8f\x94\xbf-|p\x19\xf5\x0c\xe3?\xa5\xe6\x81\x00\x10\x8c\xdd?L7\xd0\xa0\x1a\xc6\xb2\xbfc\x97\x9e!7\xf8\xd4?qt\xa1\xf9J}\xe9?\xd9,\xd6!bV\xdc?\xe0\xc8X{\xb9:\xe0?C\x82\xe6\x9d\xef\\\xc8?\xe4\x1f\x0b%\xe5\x13\xc4?,\xcb,\x07\xe9\xa3\xdf?\xc0\x16]\x04>\xa3\xdb?\xd0u\xfe\x97\xf7l\xea?\xa8jcNH\xb1\x92\xbf\xaba(\x1eA\xc3\xc8?;\xf1\xd1fk\xbe\xdf?\xc9\xf9\x9d\x16\x9d\xcb\xd0?\xb2RW\x08\x93\xb5\xb0?LL\xfcr\x8eR\xdd?\x16\xff\x04_\xb1B\xde?\r \xc5\xfa\xa7\x12\xd7?\xdf\xf2\xcaU\xb8\xf7\xd9?\xfe3 \xc8=4\xe2?hXi\xc4\xa3\x15\xd9?\x01\x1b&\xf8\xd0\'\xdb?\xeb\x86N\xfc\xd6t\xb3?`\xa9;\x8c\x00\xc1\xe0?Q\x86(0\xfe1\xd2?\x0e\xfd\x04\x87\xb5\xc8\xde?c\x81UE\xa8\xa7\xd0?\x06\xc1\xa4)^#\xd5?\x88\x12\xe6\xfa\x90\xe3\xbe?\xcbi\xa1h\xf2uv?\xc8\xca;\xd1\xde\x1f\xe4?\xe3\xba%vl\xd3\xde?[\xb7\xaf\x9e\x16\x9b\xdc?\xe6(\x96\x8b|@\xd7?c\xa9`\x8d\x81D\xd5?\x7fd\xc6Cd\xf9\xd0?`\x068\xa9\xd6\xd6\xb7?\x86E\xdco\xcaT\xcb?\x83\xda\xf3ZU{\xdc?Th\xc3r\xe0\x88\xd1?>d\xd1k\x04u\xa0\xbff\x11\xf16hd\xe4?\xbe\xef\xa8bB\xfe\xde?E\xbf\xcc\x80\x16S\xcf?\xc2#\xa0\x9d>\xf4\xe3?\xdb-!\xf2\x8e(\xc3?<e\xac\xc6\x1f\x0c\xe5?R\xfd\xb7\x15h\xff\xe0?I\xbbRs\xba^\x94?\xad\xdd\xbeZ\xa0\x12\xc4\xbf\x9c(\xf0\xbf:\x8e\xe7?l\xf3\xac\x14\x9d~\xdd?\xeao\x84\x9e\x02\x81\xc8?mJ\x1d\xb8L\xf7\xdf?\xb7a\x18(\x04\r\xda?\xa6\xd0\xd73\xf4R\xd7?N{Vvp\x82\xd8?\xd8\t/i\x10\xdd\xdd?\x13-Wu\xad\x87\xde?\xe4~\xfbE\xebl\xd7?~\xd9\xfa;\r\xe3\xd3?^\x9d\xc9\xbdV\xa8\xe2?\x8f\x97\x9e\xda\xf9[\xd3?34 c\x07\xcc\x84?\xe4\x8a\xefi\xbb\x89\xbe?\xfa@\x1d\xfb\x95Y\xcf?\xc0\x19\tVI\xc4\xe3?}\x89\x9e(\xc7\xa8\xcc?7\xf1\xf9\x04|v\xa3\xbf\x1b\xd7\xee\xe3\xf5\xdc\xdc?M8\xb4\xa6\xadN\x9c\xbf\xecFDzU\xa5\xc8?\xb1j\x83\xed=\r\xd5?\xc4w\xccb\xc8z\xd4?\x18\xa1\xed\xfa\xd6\x82\xdb?\xa6\x01\x8c+\xee\xcd\xb2?A\t7\xda\x86\xe3\xe5?\xac#%\x9e\xb33\xc5?(\xd6^&\x1a\xc6\xde? \xf0x\xa1&\xa7\xe9?\x05e\xbf\x1a\xd4f\xc8?\x1e\xd2]\xb5\xb5}\xd3?k\x98+4u\x7f\xd2?\x07\xe3\xdc\x06b\xc5\xdb?\x19\\v\x0e\x10\x88\xd1?\xbd\xdf<\xa6\x0c.\xd2?b\x03\xce\x1eT\x1d\xe2?\x8c\x8aV\xc4\r\x9b\xd5?\xbdy\xa3N;F\xca?@\n[\xb7jT\xcb?\x88G:\xc6)\x9e\xd4?\xc2\xcd\xcb\xd3< \xdb?W\xda\x15\xffP\xc4\xc1\xbf\x18\xb6(J:\xc2\xd6?%\xe2\xb5<7\x05\xd8?\x93-\xdaC)X\xb4?\x17\xad\t\'\x03\xe7\x91?\xa4\x9b\xb6Ho\xa0\xe4?:BDa\xb9\xdf\x82\xbf1S\xc6\x82\xf0F\xd5?0\xc5\xd6\xaah<\xd0?\xcb\xc2\x9f\xfbR\x89\xda?\xb9\x9e\xc0\xf7\xc4\x8d\xf6?\x847F]\xa7\xfd\xcb?\xdc\x11\x17\xf1\xb9\x89\xd5?\xfa(\xd1\x92\x879\xcd?\x8dGL\xe0yu\xf0?X@\x82w\xe3~\xd2?4)\x94#9C\xec?\x99w\xa1U\xc2\xd0\xf2?\xa4\x11\xc3\xf3\xb3\x12\xd1?\xf3\xee=\xe4\xd8\xd5\xf3?M\xba\x96M\x12L\xbb\xbf\xdf\xe1\x1d*\xfe}\xe5?\xe4\xf1{\xdf\xe3H\x82?\x85\xe7\xf6\x89\x8aR\xc5?\x93<\x04\xd5\x03f\xc9?v\x1f\x8c\x90\xb9X\xd2?\xf0\xb9\x8e\xc8\xe1\xbf\xda?i,\xd0\x84\x05U\xf7?\x80\xcc>\xcb\xa7Z\xec?o\x1a7*`]\xc1?\xeeI\x0b\xa9\xfc\xde\xe8\xbf\xb7}\xe8\x01}\x07\xda?\x1c\xe6\xd9\\E\x1d\xed\xbf\'\xfel\xac\x9c|\xe2\xbfX\xa4\xefl\xcd\xe5\xe9?zu\x9eU\x1f\xb7\xc9?azd\xd4\xed\xac\xec\xbf\x85\xd3I\xd4^\xc8\xeb?\xa3\xd8\x0f\x16\x13\xf8\xd4\xbf_\xa1\x8eZw\xf3\xe2?$\x02\xe9\xeb\x9e\x17\xd1\xbf\xc4A\xe63Vq\xf2?\x81\xa5R\x14\x0eE\xe0?<\x7f\x7f\xb8\xa3\xf7\xa0\xbf4\x08`\x12\xd0*\xf2?<\x88\xea\xf0\xf9\xa2\xd3\xbf\xd6(\x15\xca\xf8m\xfa?\xed\xd6/\x88\xa3`\xe0?\x0fA\xc8\xd6\x19\xf1\xa2?\x99\x1dL[\x8f\xbf\xe8?\x86,\xbb\x86q\\\xd2?\x13\xa0U\x1b*.\xd9?\xb8]\xdb\x01\xa1w\xd4?\xefSy?#`\xb1?\r\xa5~\x1bl5\xe5?0\xdb\xe4d\xa7C\xe1?\x81J\xa2\x97Uv\xd8\xbfx3o\x1c&\xe5\xd8\xbf\x06\x8cB\xc2\xfc\x98\xdc\xbf\xe6\xe7\xc0\xac:\x08\xe7?\x9e\x89\x81\x9f\xef\x85\xda?\x8f\xb5K1\r\xfc\xcc?\xc1\xf9RMH\xde\xea? \x8e\xdc\x7fr\xe9\xd6?/\x9emGmq\xe0?D\xd3\x0e\xc3%\x9e\xd4?]\xe0\xd2\xd9\xa42\xdf\xbfF\xfe\xd7XnH\xc7?\x8f\x02\x80R\xa6Z\xda?\x9a\x16F\xc1\xdd\x15\xf6?\xfe4j\xa8\xe2\xc4\xb0\xbf\xacU\xcf\xd9\x7f\xd9\xec??c\x86\xc5\x82\xbb\xd9\xbfu\xfa@\xfd\xe3o\xd4?|(\xa0]\x82i\xea?\xb0\x98U\x98)1\xd5?\xc1\xd9\xc6^\xd7^\xdb\xbf\xc1\x89+\xf4\xdc]\x86\xbf\x1d\xe9\xf4\xf7\x96\xea\xd2\xbfdY\x17\xd4\xed[\xef?\xb3\xc7\x94\x8a\xab`\xe7?\xbc\x93\xc3\x87vm\xf3?\x9eGa\x12\xd9l\x99?\x07Q)\x9a\xf5C\xf0?\x83\xf7:\x8di\x87\xed\xbf\xad\xc8\x19\xfe\xcd\xfe\xeb\xbf*\xa8\xb5[\xdd\xbe\xd3?\x97\xfb$\x1a\xb6\x93\xd0?\xfa\xf9\xad\x97e\xa8\xf7?\xeeXK>.K\xeb?\x0f\xe2\xfe\xdb\xc1\xa3\xbb\xbf\x8c\xf53\x00\x02\xc6\xe2?\xf5\xe0w\xf8U#\xd9?\x04A\xff\xecG\x9e\xde?\x11\x04\x00\xafO\x00\xb3\xbfZPg<\xea?\xf5?b(J\xa3\xa6j\xe2?\xbc\xce\xf1ZB\x15\xe6?V\xe4\xa6\x82\xa6z\xe3?\xb5\xc8\xb0%\xe1\xe0\xc6?\xfdF\xe6\x95\x9d\xfb\xf7?u\x16\x99\x17\xdfM\xd0?D<3\x00Q\xe4\xcc\xbf|[\xae\xb2K\x90\xca\xbfY\xe8W\x95\x9d\xc1\xeb\xbf\xeb\x8f\x0e\xe5\xcb\xda\xde?\x80oQ\xa3\xc4\xb0\xb2?\xdc5_Ih\xff\xeb\xbf\xe7d\xe6J\x08\xcd\xec?\xde\x1c\xa0\xfc\xe90\xe5?D\xb2\xc6\x01K\x81\xd6?m\xe5\xb4Um\xd4\xeb\xbf\x1f\xd5\x0c\x99\xe3(\xd0\xbf2t-\xd3\x1b\x07\xd8?\xa0\xc0\xd3\x1c\x95\xeb\xf2?\xcf0\xddd\x96\xf5\x98?\xe9M\xf9v3\x86\xeb\xbf\x12\xb0\xb6\xe6\x810\xe2?\x07\xa1\xffT_\t\xd0?\x82\t\x1c\r\xbd\x15\xef?&\xd6\xed\x88\x1c#\xcd?F\xb4\x18\xd0\xdc\x14\xe1?\x16\x16cK4i\xee?\x17\x82\x9eo\x16\xf5\xc8?\xb5!C\x0b\xfc\xf8\xbc?_1\x190\xbd=\xf9?\xbd\xf6m\xa8\x9f\xdc\xca?\x02\\\xac\x81D)\xda\xbf<0i\x99\xf5\x83\xd3?w*\xbd-E\xa7\xe6?\xf0\xbe\xce\xd6\xb3\xaa\xf0?\xed|\xa2\n.\x13\xd6?1\xcf\x07\xb5y\x80\xe4?-$+\x9cK\xde\xe8?<z\x0f\xf2\xdbX\xe4?g\x0f\xa2\xdep\x9e\xef?\x8e\xa7iV\xa4\xbc\xea?\x05\x1a\xc9JZX\xd5?VC\xda\x83\xb3.\xe1?\x0c?p\x06\xa9)\xf4?p8\x03u\x07\xce\xda?C\xc1\x8a\xde\xeb\x02\xf0?F\n\x84\xc8T\xeb\xe8?\x11\x90\xa2\xe7\xdb\xac\xe0?\xe6\xf9(\xb2\x91\x91\xe7?-\xb2e\xb9\x04\xb2\xdf?\x7f\xc1\xd8,\xa0\xa0\xe6?\xa4\xa8\x039\xe1\xdd\xd6?\xe1\xd6\r\xe3\x9dG\xd0?L+m\ts\x9e\xda?\xa6\x9d\x81\x94j\x85\xe2?\x1eb\x1c~(\xc9\xef?\xcf\xd0f\xae*\x00\xe0?x;\x14\xffe\xce\xe8?\x1e\xbf\x9b\x16\xdbr\xc9?l#@w1\xe2\xbc\xbf\x88\x822\x95\xf9\x91\xde?\xba\xcc\xb9\xf0]\xe1\xf2?\xcf\x9e\x86Xw\xc8\xcd?+\xa0\xaf\r\xfd\xd5\xcb?\xae\x96\x98n\xadS\xd1\xbfR\x0e\x1f\xcfl\xca\xcd?8\xe3\xf9~%\xbb\xcc?e\xca\x98\xd2:n\xd5?U\xe0\x87\xceRi\xc0\xbf7\x81\xb8\x86\xd7\x02\xe2?G\ndb9\xa7\xd5?\xfc#\xe2\xc6\xdc\x87\xee?\x1f\xec\xbd\x9f\x9f,\xd5?e\xdfX\xcf0\xb7\xe5?\xdc\xaf\x9c\xc4\xd3$\xe6?A\xac\xc19w\r\xe8?\xc7 G\n\xddj\xe5?\xac\xaeP\xe0Ae\xd0?b\x9at\xd3\x91\xcc\xb6?4\x1a%\xf2\xd2F\xc2?E\xa4\xd7\x1a\xf7\x1e\xd5?4\xa9>V\x069\xe3?\\sk\x17\xf1\xc9\xf1?\x934\x99\x0c8\x02\xf1?z\xe4\x02:\x93\x8b\xe7?>\xf4\xc6\xf7hh\x94?\x9f\xc0\xefD\x05\xd3\xea?y\x84C,F\xaa\x12\xbf\xa8\xe3\x8fB\x166\xda\xbf\xae(B\xd6]\xb6\xd5? \xae,a\xb1z\xcd\xbf\xca\xf5\xba\x8ep:\xd5?0m\xa2\xc2C8\xe3?8?\xea#\x83\x7f\xed?\x1eq\xe1Gz\x82\xe6?\xbe\x92\xfe\xa8\xaf)\xf1?\xbf\xdd\xfaO\xd5\x01\xef?\x96\x96\t2BG\xf1?\xad8be\x90H\xd9?\xaeVl\xc7\xafE\xdd?.[\xd42\x04\t\xd2?\x91\x03K\x8f\xca\x85\xe4?\xa5\xd2\x15\r\x88\xba\xd6?\xe8\xb5!\xb1!D\xc5?\xb3k,\xd2\xc5\xf5\xc2?\xc2\xb6v\xf7\xa5A\xc3?]f\xcb^\xe9\x8d\xd4?w\x80:Cc\x05\xd9?\x82\xa2)k@r\xa4\xbfc@\xb7}\xb1\x99\xe1?~Ae\x8f\xc5\x19\xc7?\xaf\xb3\xf3\xad\xca\xfd\xd3?\x9f<\x82\xae\xa0)\xb2?\x90\x0f\x84\xf8.\xb4\xe0?\xba\xe3\xa4[\x8e\x8e\xd7?1\xa0\xf4r\x10\xaa\xca?\xa6y>\x02$\x05\xbf\xbfA\xaf\xedVEp\xd9\xbf\x95\\F6X\xe0\xd7?\xa0\x8eg\x8cp\x86\xee?\xbd\xb3_\xe8e\x03\xd2?\xd0\xc6\x1a\xcce\x84\xed?\xbe]\xb7{\xa4\x0f\xe4?\xe2\xce\xbb\xbc+\xc0\xf0?\x0c\xdb<lC\xda\xea?<H\x08\xef\xdf\xc5\xe1?\x96\x9e\x93\x14\x8f\xbe\xe5?\x1f\xf1\xc6\xbd\xbe\xea\xe5?[\xa8X\xf5\xdcL\xee?`6f\x05Z\xac\xd3?Oa+8\xe9\x9d\xdb?\x971n\xa8\xc4\xc1\xde?\xca\x99\xb8\xe2W\xa9\xd2?\xceeV\xabE\xe0\xea?\x16d\xb0\xe6\xca[\xdb?\xd0\x07p\x97AF\xec?eX\xf3\xb0~\x90\xc8\xbfbT\x7fu\x7f\xbe\xef?\xdc\x00(\x82\xa8\x00\xcb\xbfp\xdb\xd8e\x1ch\xc2?4TbX\xd9\x8c\xe0?\xb2\t\xf7\x1e$s\xf0?I#\xef\x18\xc6\x97\xe9?\xe9\xcbS{p\x88\xdd\xbf\xa0\x8f\xbc\x0en\x9f\x9d?PR\x82\x9ch\x06\xea?\x9f\xe4&\xf2\xd2\x81\xb4?!\xb4\xaa\x12i\xd3\xd4?\xe83\xb58\x95p\xe4?\x88e0\x06S\xce\xe0?\xb9Pz\xa4\x86\x89\xe5?\xd1j\xbf)R\xb4\xea?\xe4j\xd9\x82\xce\xfc\xe2?\xd8\xa2\\\xcd63\xf1?\xd0\xbd\x1d\xb2\x00#\xb7?\xcc6\x9b\x19:\xab\xe6?\r\x18\xc1\x90\xb7q\xd8?\xed\x94\xd4\xfb\xb1\x0c\xb5\xbf\x97\xd3L[R\xdc\xe2?}\x06\x91/\x88\xfd\xe9?[\xb1 \xbc\xd6Z\xe2\xbf}\xd7\xd5\xafD?\xe9\xbf\xd2P\xd0\xef\x9cN\xf0\xbf)z]_\x90@\xe6\xbf(s\x1a\xbe&\xf6\xd1\xbff\x19\xe0\x9b\xa6\xc2\xef\xbf$ \x9f\x8d]g\xed\xbf\x83\x80\xa8?P\xb6\xf2\xbf\xba\xe4\xe0\xc1/\xdf\xf1\xbf=@\x04\x0fG\xa0\xe9\xbf\xa1\x82\xc9\xb4BF\xef\xbf[y\xe5\xde\xb9\x1b\xee\xbf\x10P\xed\rld\xe6\xbf\xc2Rf\xa9\x00\x87\xea\xbf\xe0\xda\xc2\xc7_\xea\xf0\xbf\xa3\r\xaav`\xb6\xe9\xbf\xc6OQ\xea\x90o\xf0\xbf\xdd$\xff:\x9f+\xef\xbf\xfe]\xaeJ\xe8h\xeb\xbf\x13{\rJ\xc7 \xee\xbf\x9a\xb1\xa3\xdc(l\xe1\xbf\xac\xa9R\xc1D\x95\xe3\xbf\x0b\x99<\x0b@~\xe8\xbf\x0f\x94a{\xc7\xd9\xe7\xbf\xe2p\xf7\xf8;J\xe6\xbf\xebP\xa9\xbc\xd9\xbe\xea\xbf\xa5\xd7\xb7\xbe8\xa4\xe2\xbfjFh\x11T\xed\xe5\xbf\x0e\xee\xa0&\x91*\xed\xbf\xe5\x98[\x89g\xd6\xeb\xbfQ\xcf\xf3\xc6{\xe8\xbf\xbf\xe7\xce\x9dADS\xd1\xbf\xc2\x9fy\x87[n\xdf?\xd2(\x8e\x9c\x0bQ\xcb\xbf\n*8\xcdE\xe4\xe3\xbf\xf7\xee\x16\n)\xd3\xee\xbf\xff%\x83\xe7r\xe2\xcf?\xe0\xf4\x0e\xb1v\xc0\xee\xbfR\x82\xdf\xbb\x0e\xbe\xe6\xbf\xe8S\xa6RCK\xef\xbf\xb2\xa3Z\xa1\xa6B\xdb\xbfb\x90$Q\xa0\xe0\xf0\xbf\x13\x08\x046\xc5\xa7\xec\xbf\xd5\xdd\xc1\x16b\xa0\xe7\xbf\\\x11F\x12\x86\x1c\xf1\xbf\xe7\x14\xb4Vs6\xe5\xbf%@W$\xeb#\xe8\xbf&\x15\xac\r\x85\t\xe9\xbf\xbe.\x86Z2\x9f\xe5\xbfZ\xd5\n\x81H\xa4\xee\xbf`-\xcb\xb5\x15e\xe8\xbfA\xea\xb5\x9f\xd1\x98\xf2\xbf\xbd\xd3\xcc\x0f\xf4\xdc\xe7\xbfM\x8a]\xd1Z\x01\xd0\xbf`_\xab.,\x8c\xf1\xbf=-\xa8\xb1*\x19\xdd\xbf\xb9Y\x06|\xc6]\xc7?a\x90O\xdb\x10\xe3\xde\xbf0\x84.\xb6\x19\xbc\xc6?\x9b_L]m1\xe7\xbf\xbck\xa09\xc7\x93\xe8\xbf\x9b\xe8C\xb6\xb9\x8f\xf2\xbf)\xfd!\xe7\xb4\xde\xed\xbf\x87-!\x1b\xd3\xbb\xec\xbf\x15\xf5oG\xe1\x9a\xee\xbf\xb6t\x9c\xad\xfd1\xe6\xbf\x07\xb3\xce\x87g\xc0\xe4\xbfO\xfc\xbd\xd9\xa1\x05\xe1\xbf\xbe\xf50m\xabB\xe5\xbf\x89\xd7\x9f\x11e\x0e\xef\xbfW"!\xfe \xf9\xe5\xbfj\x1b\xfdi2\xd9\xec\xbf\xa3\xca&\x05\xb3)\xc3\xbf\x8c\'\'M\xca,\xdd\xbf\xccV}\xbe\xe2\x91\xe4\xbf\x82F\xd8\x17\xf7<\xe9\xbf\x06\xdfx\x99\x91\xc9\xd9?\x1c\x81p\x9c$\xc8\xe7\xbf\x06\xfd\xeeo\x03p\xda\xbf\x19\xc9H\xf40\xe6\xed\xbf\xbf\x17\xaaZ\x9d\x92\xe0\xbf<\xf3\x96\x94-\x9f\xee\xbfO\xb1\xf4J&\xc6\xea\xbf\x08\x9fG\x03\xeeR\xe9\xbfI\x11p\x17\x8c\x84w\xbfFy*c4\x17\xdb?\xe5\x89\xaa(\xd7R\xe9\xbf\xa1\xd0w\xaa\xc4z\xf1\xbf\x9c\xec\x13Z\xef.\xed\xbf\x87<\x10:\xa9c\xec\xbfz([m\xf7\xf8\xe6\xbfB\x9a\xcb\xbc\xd7\x14\xe6\xbf\xb1\xb6d\xe8B\xb1\xf0\xbfVU\xab\xf2\x16\xbd\xe8\xbf\xcdvm\xa46\x9c\xea\xbf\x11v\xa7t\xf79\xed\xbf\x8cO\xe3-\xbf\x8a\xf2\xbf\xdf}q\xf0\xa9\xd3\xea\xbf\xfe\x83\xd3\x93\xa2o\xe9\xbf\xa3\xee\x806\xcf\x18\xe3\xbf\x9d\xcba\xfaRu\xeb\xbf\x1a\x08\xa0\x9e\xaf\xff\xee\xbfk\x88r@\x81\xa9\xea\xbf\xae<8\xbd\x08\xfb\xe4\xbff.\x02\xe617\xcd?\xf1\xc0\x146\x05\x80\xf2\xbf\x97\x00\x02\x89\xcc\x18\xc6\xbf\xd9\xea|k$T\xa3\xbf}_yI \xa1\xed\xbf\x08\x1a?C\x85\x15\xf2\xbf\xbfC5J\x00\xc6\xee\xbf\x8e\x88#G\x04\xa5\xd9?\x92\x99\xb6\x9bl\x8f\xdd\xbf\xdfX\n;\xec\x18\xed\xbfC\x92\xb7T\x11\xeb\xe7\xbf<\n}\x1e\xa0R\xe8\xbf\x80\xb7yo\xd9\x8b\xd9\xbf)E\x82\x97\x84\xd8\xf0\xbfJ\x7f\x8f\xc3\xf1S\xe5\xbf ng\x8f\\\xe7\xf0\xbf\x87s\xe7.1K\xec\xbf\xd6\x9f\x06\xa1<\xf5\xf1\xbf\xb1\xf2\xc9\xe0(\xb1\xe4\xbfW\xaek\xf3J\xf3\xd4\xbf\xe3\xfc\xce=o\x03\xd4\xbfh\xf7\x1b\x0c{b\xe7\xbf\xef\x937@o\xe1\xee\xbf\x83O\xbe\xb1|\x1b\xee\xbfL\xf1n6\x000\xe1?\xdb@\xaf\xa4\xc1M\xe4?Rn{\xe8\x9d\xbd\xe7?\x95c\x9a\x14\xf4z\xea?\x1dm\xd7\\\xcb\xa3\xe7?\x12\xe6\xf3O\x1c\x15\xeb?\xc4/\xc8\xf06}\xe7?f\x16>\xb2\xc9\x08\xec?\x1a\xa5\xdeQ\xf7\xde\xed?d\x8f\x85):O\xf1?\x02\xb15<u\x0e\xdd?\x08\x91\xae\x87\xa6\x92\xe0?\x93\x98\xd5|\x99\x86\xea?\xd6r0\x94z\xa5\xec?\x9a\xe2\xe0 n\xe4\xe6?l\xaf9IJ\xa6\xec?8Hx\xe2\x95\x0e\xe5?\x83i%\x03|O\xe9?\x90\xe1\xf7K@\xc4\xe8?5\xd4\x94Qs5\xe1?\xc5\x89\xe7\xf6\xc6E\xe5?\xf9\xaf\xfcFi\x9d\xe5?\xa4\x1a\x9a\xe73\xab\xe5?\xf9\x15\xe7\xf3\x1aP\xd0?\x8a\xfb\xfd\x1a\xe7D\xe9?8\x04\xd0/\x07\xb7\xe8?\xacdw\xb3\x93\x07\xe6?@9\x95\x01\xf0\xd2\xd9?(*\xf8\x9b\xa2\x8a\xe3?4\x87\xb8(\x8c\xbe\xec?\x05K\xff1\x8b\xd2\xdc?\x16>\xbd\x8e\xa9\xe7\xbf?\x8c\x11\xe7V\xec\x85\xad?\xd0\xe2\xa3z\x9d\xd4\xd9?\xf01\xa3\x94\xdap\xe5?\xd9\xfe\xfd61E\xd6?\x9bL(\xa1}w\xe4?\x857\x7f/\x84-\xe5?\xa1\x11\xf3\x14,\xac\xe8?\x8c\xaf<\x80\xbc\x15\xe2?\xe8\x80\t\xc7\x83\x1d\xec?\x1eq\xe2\x88\xfbg\xe2?iS\x1b|\xae\xf2\xe8?U\xd42\x92\\\'\xc6\xbfEx\xa8a\xe7\x7f\xe0?\xf1\x0f`l&\x85\xe7?1\x1b\xa2\xc8\x1c]\xdd?&\xb78\xac\x84s\xec?\x8b\xfdu\xbd"\xc3\xe1?\xd6\xd1\xb8\x1at\x18\xef?V.\xea\xe9\x15\xe8\xe0?\x92\x10\xafB\xb0\xc7\xe7?\xfe\x8dgs\x81\xa0\xef?\xa9\xdb\xe8\x15\xfd\xf1\xe6?\xe6\x85\x18\x0e\x8a\xc5\xe7?\xb4\xff\xd4\x85D\xa1\xe2?<\xe1\xfb\x1c\xc5p\xc0?F\x8c\xae\xbb*a\xe1?0"\xc0\xae@\x1d\xeb?\xdb\xb3W\xfa\x10\x8a\xe4?z\x8e(\xc7W\xbf\xe5?\x04\xb0cR\x81:\xea?\x95\xa2\x93\x86\x94\x99\xea?\xf3\xd1\x1ff\x85r\xed?[\xbd\x8aW\xd1\xbd\xd4?h\xa8\x05\xd1g\xf7\xc3?\x91\xd0\x11\xc0P\x05\xe8?\x05&\xb1\xf8\xb1\xa9\xd9?\x05\t8\x01\t\xb9\xe3?~\x81J\xd0\xa9\xa5\xdd?\x82\xccu\x12Xg\xc4?\x8e\x12S\xaa\xdd\xae\xe8?\xa8o\xdf\xf8\n\xf1\xe0? \xb8,\xf7\x8c\\\xe5?(\x83=\xc0\x93\x16\xe5?\x18P\x0cR\'7\xea?i\xf19v\x13\x1c\xdf?\x0b\n@\xcf\x9a\x90\xde?^\xb5!\xae\x0c#\xb0\xbf\x9a\xbd\x1e\xee\xfed\xed?\xfb,G\x83d\xbc\xe3?\xcc2\x89<\xf5\t\xe3?b\xc3\xdf2\xd4:\xdf?\xd7\x812\xe7\xb6k\xe4?Tk\xcf#-\'\xd0?\x97\xd6\xe7i~\xf6\xc3\xbf\xcb#Y5b2\xe0?\xb9\xffiL\xf2T\xec?Q\x00\xdfGGr\xd8?\xde6\xc4N\x91\x89\xd3?\x82\xdb_\x0f\x02\xbe\xee?\xef\x0c\xdf\x80\x0e\x15\xd9?\xcft\xa3[$\xa5\xe9?[\nk\x97\x14W\xe7?\'\x81\xdfu\xcb\xb9\xf0?\xe2(UH\x14\x9c\xd4?\xff\x1cK\t\x0c\xea\xe9?j\xd3\x80WZd\xe4?@jA?\xadM\xe0?\xfc\xae\xea\xeb\xd7\x8b\xd8?z\xd1\xe9:\xaf\xe3\xdb?\x88}(Q\xeb\xb0\xed?\x8e\xf3\xa2\x82\x1b\xb2\xe7?eSX\xcf\x9a1\xce?\xef\x18}$\x8a\x88\xe4?!F\'\xfb``\xe7?qL\xf0\xa2B2\xa8?b\xee\x07\xa0\x08\xf8\xd1?$\xcej&p!\xe4?\x1f\t}t\x81\xbd\xe6?;\x0e6\xb3\x0fN\xe9?.\xfb^\xa7k|\xd0?\xc5\xc5\x95\xect\x1f\xd0\xbf\xf6\x8c\x94E\xf1\xf1\xe6?8\\\xeb\xc4b\xaa\xe1?\xbb\xcf\x8eR\x06j\xd5?\t\x15\xbb\xef\xe4\x16\xd2?\x0b\x1c\x84z9\xf4\xf1?x%\xbb{0~\xe8?\xf9Y\xf7\xd0\xfa\x96\xde?\xb1\xd8\x0c\x08Q\x00\xee?\xc6\xf8l)\xed\x9d\xe5?\x12\xf3\x92\xf1\x9f\x8f\xe5?68Gd\xce\x96\xe7?\xdb\xc9\x1a\xc8\xb3\xbc\xe8?\xfa\x8b:\x1aL\xb7\xd2?F\x8c\xc8\x97H6\xf0?6\x19\xbd\x7f\xec9\xe5?\xbb\xb0\x1c\xad5\x04\xe3?qqp\x87r\xc3\xa2?\xd0\xf3\x15c\xd2\x8f\xc9?Y\xa7\xa7\xe1\x92\xa1\xcb?D\xfe~\xf4\xf3\xbe\xea?>\xd6\xae\xca]\xa3\xc7?$8\xb5\xb7g_\xe4?a!B\xb9\x96\x1c\xc7?\xca\xb4\xa1\xd7|\xe2\xe1?\xfb\x06\xb0T^w\xe4?$\xa7\xd0\xae\n\xc5\xb5\xbf:\x0c\x19\xd3\x11\x15\xc0?\x96\xbc\x83L\xf4l\xdb?\x1aEEM\n\xbd\xe5?\xe0v\x89F\x04\xcd\xd1?,b\xfac\x7f\xcc\xe4?\x87\xaeX\x1clA\xa9?\x870p\xfd|\xa7\xc1?\xf7\xa6\xff\xa8\xb6\x0f\xbb?`\xf1l\xb9;\x11]?\x02\x99\xff]\xd8\x08\xe9?\x8dO\x0e\xdb:\xdb\xca\xbf\x1e|5%\xe7\x9d\xc5?\xeb\xf6\xcc\x13k\\\xd1?M\x90\xac\xed8\xc0\xda?\x82\xf9\xc6\xc9\x0e7\xa8?\xd4~\x98\xa3\xe1\x00\x92?\xdfi.\xb6\x0fm\xb3\xbf$\xe7\x14\xa0\xf0>\xde?R=C\xb0\x03\x9f\xae\xbf6\xb4yI\xd9\xb8\xe6?\xf2\x10\xa3\xfeO\xde\xe0\xbf\xf8_v\x98\x0ew\xf3?\\\xf9S4\x9eg\xe6?\x8f\x0fz\xdf\xf8\xfdt?\xab#W\x85i;\xcb\xbf\x1b\xf5\xb9X0\xba\xea?LO\x81\x9d[^\xde?\x9c\xa0\xd1l\xdb\x7f\xe0?\x90\x9fh\xb9\xba\xc9\xc7\xbf\x1c\xf9\xc0\xc0\xc0M\xe2?\xd5\xc4[\x96\x16\xdf\xcb?\xdd\x90\xf4\xc9\x08\x0f\xb4\xbf\x15\xe5\xd3\xa6\xd0\x08\xc8\xbfG>\x9e\x1eL\xf1\xc9\xbf\x83i\x14\x9ag\xda\xc0?\x97U\xd04u\xe0\xa7\xbf\xac\xd0\x18Ih\xb2\xe3?8Ub;\xbeB\xda?v\x87\xff\xb3\x08\x14\xdd?\x1dpQ6^1\xd9\xbf\x14I\xb3h<1\xc5?\x8dm\x96\xc0Z\xea\xdc?C\x04\t\x8d\xaf\xe4\xc7\xbfM\x90xr\xd5\xe9\x97?y\xf6\x1f/\x97t\xb2? \xdd\x1b<\xa7\xd6\x95?\x89\'9\xf3oY\xd7?_\xcfS;\xd3\xc0\xf2?a\xae\xd5\xfc\xe2\xd6\xb8\xbf\x9f\x97\x90K\xa5\xd8\xdb?\xd5~Wh83\xde?z\xd8\xd1(\xb5f\xce?\xfe\xeau\xcf\xf6]\xb6\xbf\xf6\x96\xe5\x822^\xdc\xbf\xa4\xc2"0b\x9f\xe0\xbf\xfa\x95\xc2L\x1d\xb0\xe1?=\xa6\x89\x92\xb2\xee\xe0\xbf\xd1\xa4\xc6\xf3\x1f\xc7\xcb\xbf\xf6\xc9\x0e&\x92\x0b\xd0\xbf\x81\x7f+OPB\xb9\xbf\xd7L\xf2\xdf\x89\x08\xe0?\x80\x04\x883\xf9\xf6\xc7\xbf\x86\xc7\xb4\xf8X\xf0\xac?\xd3\x1dt+\x08r\xb7\xbf\x83\x81@5\xd7\xbe\xa8?9\x07\xf0\xfbf\xe7\xf8?\x11\xeb\\\xd5\xc8^\xd9?\xbf\xc8{:>>\xdb?\xc1\x06\xe0\xfd8i\xdc?\xba\xa2]#oi\xb2\xbf3\xcac\x9c[\xc9\x9e\xbf\xd4\x8b\xb3\x04|\x0f\xe3?q6\xcdL\x12\rx?"!\xe5w\x90\xaa\xe2?pm\xcd\xc3\x9b\xa4\xd5?\r\xae\x13\xb7\xa9\x18\xe0?\x12\xdc\xb9\x8aj\x84\xdb?*\xdd\xee\xfcf"\xb9?\x99\x81\xf2\x01x\xfe\xde\xbf\x9e\t\xbd\x81\x9eN\xe4?\xd6\xc4\rn\xa7?\xc8\xbfd\xaa\xc5\xe1~Z\xda?\x98\x15n\x98\xaa\xea\xb2?y7\xad@Ii\xd5?\xfcJui\xfc\xec\xcb\xbf\xfa=\x9e\xbd\x83\x08\xca?\x84\x7f@\xd6\xb9T\xda?(\x0f\x90\xae\x88D\xea?hc\x11\xbaqv\xd4\xbf\xaaTA@\x8e\x1b\xd1?\xb7\xbbO\xda`\x9e\xd5?\xdf\x143\xd4\x1f+\xea?\x18\xd5\x06E\xee\xe6\xd8\xbf\xd7>-{A\xbb\xf0?\xae\xaf\x84MJ\xa7\x8a?/\xce\x87\xb2Gt\xe0\xbf,t&\xbe\xb8\xc7\xe6?\xf5\x12C\xa3+\x90\xde?N\xeb\x97\x86G\x87\x7f?\x81\x1c\x1e\xfe\x98\xac\xdf?\xa5\x86\xe6\xe4\xdf\xa8\xe6?\xfb\xb8$P6\xba\xbf?\xaf\x9c}\x88\x02\x1e\xc2?\x89Ax\xea\xc4M\xaf?{\xcf0\x0f\x89}\xd2?H\xe3\xf9\xccL\x05\xe6?\nS\xde\xc0\x91\x88\xd9?[\x93\xdc]k\xf6\xb7\xbf\xc2\x94\xeaG\xf5\x00\xdd\xbf\xdd\xfd\x14\x9fi\xb0\xe6?\xbc\xd8\x8b;\x9c0\xc3?+Q\xabW\xf5\xaf[\xbf\xaf=\x05\xba\xf1\xa0\xeb?\x80\x83\x03\\\xb6\xd7\xd2?\xc5\x8dG\xb0\x93\xba\xac?\xa4\xb7\xcc\xf4\xf51\xe0?F\x802\xc2S6\xc5?}\x12\ni{A\xc7\xbf\x19\xa1\x14\x83.\x94\xe2\xbf\xdb3\x9c]\x9e\xff\xdc\xbf\x8d\xe0\xf9\xcb\xa3l\xd3\xbfl\xa4X\xfc1\x95\xdc\xbf\x17\xc0sE\xa5u\xda\xbf@O\xb3("\x87\xda\xbf\xd6{\xd3\x95D\xb3\xda\xbfjf\x14~I\xd6\xdd\xbf\xfa\x08\x99\x9fQ\x9a\xd7\xbf\x07KD\xd2\xac\xf4\xcc\xbf\xb6\x17&\x8d$\xf5\xe2\xbfo#J\xa9\x8e\x0c\xe2\xbf\xb4\xa8\xf7\xd1;+\xe2\xbf\xef\x0bS>\xf5\xc6\xd1\xbf\x89\xcb\xf0t\xf0\xa3\xe0\xbfl\xca\xcf\xdd\x12\x08\xd2\xbf/\xc7\'\x19\xff\x97\xda\xbfp\x87\xa0\x042\xc9\xd8\xbf\x93\x10\xe0\x92\x1bR\xc9\xbf0\r\xf2\x1c.\xf7\xc2\xbf\xf41N\n\xa4]\xd9\xbfy\xdd\xb5\xd1o\xfb\xe3\xbf\xa6\\\x85\x9c\xa2\x97\xdf\xbfF\x9f\xaa\x93\x82\x8a\xe3\xbf`8\xcc\x9e\x1b\\\xd9\xbfG\x8c\xb6\xff\xbco\xd9\xbf\xeb!\x05k\x0c\x80\xca\xbf\x00~\xb7\xfdZ2\xdb\xbf\xb9-\xa7\xdf\xcb\xcb\xe1\xbfU\x00\xae\xa4\xa0\xe4\xd6\xbf\xc4\xec\x1b-|\xc2\xd4\xbf\xc7{\x98=A\x1f\xbe\xbf\x9d\xab\xe1\xa5/\xcd\xcc\xbf\xa6\xf2\xc8\xed\'\xc0\xd3\xbf$\xf4\x99\x10\x9eu\xb8\xbfZF\xefg}\xb8\xc7\xbfs\xd0\xa7\xc9L\xa9\xdc\xbf\x800F\x9f\xc3\xc4\xd5\xbfu\x19\xc6\xb5\x98\x93\xda\xbf\xce\x1a\xdb\xab4\n\xc8\xbf\\\xb2\xc2~\xae.\xd4\xbf=noAA\xe7\xd3\xbfq\xa8\xa5\xb9\xb2\xf9\xdb\xbf\xe1\xd7\xfb\x86h\x11\xd9\xbf\xef\xe2l\xc5\xd7\xb3\xc1\xbf\xf9\xd2\xc9\x0f\x0f\x08\xcf\xbf\xc6\xa5\xa8\xc7\x91\x93\xda\xbf\xcb\xd9\xbd\x86\x05\x9d\xc6\xbfK\x8c\xdc\x07\x8a\xcc\xd9\xbf@\xe5_[\xa5z\xde\xbf\xc5\x16B5\xb6\x9f\xd8\xbfx\xae!K;v\xdb\xbf\x16\xd4\xd7X-\xe5\xc5\xbfLRE-%_\xd2\xbf\xd3\xacO\xc5\xe7\xe6\xd9\xbf\xcd\x91@\xff[\xac\xb4\xbf \xc99\x7f*D\xc5\xbfL4\xb3\xfbU\x1b\xce\xbf\x9e\xe4R\xcc\xa2\x96\xd7\xbf4\xea\xbe\xbd\x9c\x1a\xe0\xbf\xc1\x1c\x1d\x84\x9c{\xdd\xbf\x81\xbejI\xf0\x87\xdb\xbf<\xf3\xe1\xde\x94\xc6\xdf\xbfF)\xee\x01\x90\xab\xd4\xbf\x8f\xf5\xecC\xde@\xdb\xbfW\xc1\xfdB\xadk\xc0\xbf\xaao\xe5M\x81\xaf\xbe\xbf\xe89\x90\xc1wX\xd0\xbf\x914*\xd7\x13D\xd7\xbfB\'\xe0n1\xdb\xc5\xbf\xff\x9bZw\xcd\xf6\xda\xbf\xc0\xaf\x1b\x8d\x00.\xc0\xbfM3\xc4\xefp\xee\xb4\xbf\x1f\xca\x0f\xa2\xb6\x16\xd6\xbf\x06\x1d0\xb1\xee\xc6\xd5\xbf(z\xc1\xb3\xe6\xf4\xd1\xbf55d\xb6\xb2y\xd1\xbftL\xba\xb8\xd2d\xc0\xbfY\xb7\xd3\xf7\xcby\xd9\xbf\xa2`\xaa\xb2\x8f\xe1\xd3\xbf\xd6\xfbfZ\xe6u\xc5\xbf\x9c\x04Y\xea\xb0\xb9\xd9\xbf\x02R\x90%g\x11\xd1\xbfNR.wb\xde\xc5\xbfPQ!\xff\xefp\xc7?,O\xc8\xeag\xa7\xdc\xbf\x9a\x02G\xc0\xe6.\xd9\xbfX\xc7\x9e\xc8\\\xb9\xc5\xbf\xf5Br$\xbe\x9f\xdc\xbfp\x83\xba\xd1D\xda\xdb\xbf?kd\xb5\xf2\xa3\xde\xbfO\xf9\x81\xae|\xd4\xdf\xbf|R\xbf>p\xa0\xd9\xbf\xb0\x18V!Y\x81\xd4\xbf\xa0\xfc\xbc\x81\x0c\xf4\xd9\xbf-\xec\xabfqj\xd1\xbf`\x85[O\x15\x9d\xd5\xbf\xd3\r\xde\xb0\x8b\xe7\xd8\xbf\x861ZXA\x93\xc4\xbfL\x9b\xb2\t\x7f\xf6\xcf\xbf\xb4Lo!\x10\xda\xda\xbf\xd4T\x8b9\x00V\xdb\xbf\r\xb0\xb7&(b\xc7\xbf\x9d\x8e"\x85\x00\xee\xcc\xbfd\xac\x1a\xf6&\x8c\xd8\xbf\xf8\x9eF\x8f\xb7\xf6\xc8?@\x92|\xdd\xa1\x8c\xd8\xbfS,0\x8et\xc1\xd9\xbf\x88\xdc\xb6\xb5#\x07\xd3\xbf\xeb~\xe4\x85\x90\xa3\xe0\xbf\xe5U\xa8">r\xaf\xbf\x1e\xde\x1d~,5\xa0\xbf\xa8(\xc9a\xa4b\xe1\xbfx\x99\t\xc8\xeaV\xce\xbf\xb6\x0bY\xde\xd6\xd2\xd3\xbf[\xecWf y\xb9\xbf\x87\x04\xde3\x86\xe4\xdb\xbf\x15\x83\xcd\xf7\xc0\x12\xd6\xbf\x1dUA\\\xbaf\xdb\xbf\xdb\x83\xbd(\x87\n\xe0\xbf\x18\x90\x9b\x17\x8aM\xd8\xbf\x9d\x9auH\xdb\x95\xd1\xbf\xc9*\xb4f\xa0\x1a\xe0\xbf\xf2Yaz\x02?\xc1\xbf\xe9\xc0t\xdcG\xfd\xbb\xbf\x9a\xc0(uR\x0f\xdc\xbfa\xd6Q\xe0\x12\xf5\xcc\xbf\x19\xe2P\x8d\xd2s\xb3\xbf\x9d\xaaop\x999\xe6\xbf*4\xeejw)\xdb\xbf\x12\xb0G\x03v\x85\xd6\xbfN!/\xa9.V\xd2\xbf\x88yC\x9b09\xe8\xbfE\xb2\xb65\xfc\xda\xda\xbf=]&\xf8t\x11\xdb\xbfx<)b}\xa2\xe4\xbfi\xc3\x90\xf8\xf3"\xda\xbfe\xbf2\xf7\\7\xe3\xbf\xae\xe0\x9d\xde\x1c\x96\xda\xbfJ\xf4\x05\x13\xf27\xea\xbf\x03\xff\x8f2\xe2\xa1\xe5\xbf\x05Fsl\x7f\x04\xe6\xbfE\xe9\xab\xe3\x92B\xe6\xbf1\xbft\xe6\xe2\xfd\xdc\xbf\x9ck\xd2-\x98<\xe8\xbf\x13\x8f:\xe9\x9b\xce\xd3\xbf\xd5\n\xb0\x99\xe2\x83\xe4\xbf\xa3\xcbSW%\xbb\xcf\xbf\xc4\xa1\xf4\x7fgB\xe1\xbfeFq|\xd8\xba\xe0\xbf\x97S\x0b\xcf\x0c \xd6\xbf\x97\x06\x11\x10\xb1\xe8\xe7\xbf@C\x88\xdd\x9c\xfc\xd8\xbf\x90x\x03G\x0b\x1e\xdf\xbf\x06\xa6\xb7*\x85\x9b\xe6\xbf\x91\x81a\x8d\x9f\xfe\xea\xbf\x9a\xe5\xdc]\xf8c\xe2\xbf\x99<\xca\x17\xd9\xbb\xdb\xbf\x1f\xc2]O\xb3\x91\xdc\xbf\x9dh\xa2A\x86\xee\xbc?\x95\x14#\x0cj\xbb\xe0\xbf\xfd\x8a\x85\n\xfd\xf9\xe2\xbf{o\xf9\x8d\xd69\xd6\xbf\x89=0\x1c\x9c\x17\xd4\xbfu\xb6LM\x87\x02\xe9\xbf\xd3\xaa\xa5\xdf\xf2y\xc1\xbf\xa3Wc]\x01\xba\xe1\xbf\xd4\x98*Q[\xe7\xd7\xbfF\xbb1lq\xcd\xe4\xbf{xy\x05`\xbb\xe0\xbf\xcc\xce\x9eC\x86\xdb\xcb?V\xc4,b\t<\xe7\xbf:\xc2x\x05#.\xc5\xbf\x02Z\xc5\xb9\xe1P\xe5\xbf\x0c\xf0\x04\xe9@\xe4\xdc\xbf\x1a\n\x8a\x14\\\x06\xbe\xbf\xe5o\x18\xdf\xa0:\xe5\xbf\xd9\xba\x9a\x89\xfa\x0e\xe1\xbf\xfd\xee \x88#\xb2\xd9\xbfX\x10\xcbO\x84\xdb\xe0\xbf\xb6\xad\xd3,V\x13\xd6\xbf\xcb.zX\x93\x9e\xdc\xbf+\xad\xf8\x1f\xe1|\xe4\xbfD!g#\xf5\xf0\xc9\xbf9Ub\xa9\xdcV\xba\xbf\xbd\x91~\xc1\xacK\xdc\xbf>\xcf]aWO\xe4\xbf$[o}\x01e\xe8\xbf\xde\xc2\x9e!\x18^\xe4\xbf\x8d\xeb\x18G\xfda\xe3\xbfi\xa8XS\xd6\x86\xe2\xbf\\OE\xac5\xcd\xe1\xbf%\x06\x7fJ8\xc4\xd7\xbf\xa6\xa2\x9c\xa9T\x11\xbb\xbf\x99\xcd\xcf<>\xf1\xd0\xbf\x97;\xcf.\xf3\x9d\xdb\xbf\x9c\xf1`\x8b\xc5t\xe6\xbfJ\xf8\x11s\x92/\xb5\xbfi\xf8\x1e\x0f1\xb5\xe4\xbf\xb0\xaeC\x0f1\xf5\xd8\xbf\xa1\xe0}\x9b\x83d\xe5\xbfA\xef\x85\xb4UG\xe2\xbf\xcc*D\xc9\x08\xa1\xe4\xbfD\xc4\xd2\xd5hz\xc2\xbfbF\xc5\xf4\xbd\x8d\xcb\xbfu\xa3>\xd9\xe4\xb0\xd5?+\xcb\xaa\xcc$\xbb\xe3\xbf\xb9=\xac\xaf\xa1e\xe2\xbfR\xcbCk/k\xe4\xbfUS#\x89\x87>\xc3\xbfa\x9e,Y\xc1Q\xe6\xbf\x99\xf0R\xb8\xb7W\xc0\xbf\x0bi\xe3x\x03\xd8p\xbfi\xca\xe1E\x06\'\xd1\xbfO\xde\r\x9d\xb1\xde\xd9\xbf,Y\xd9=\x19@\xe3\xbf\xfb\x1a\xe7~\xfcZ\xe0\xbf\x7f#\'v\xe5w\xe1\xbfA\x1dCT^L\xe0\xbf\xb9l\xdboD\xa2\xe6\xbf\x1a\x96rB\xb9\x9d\xd8\xbfG\r\x8b=\xe3o\xd6\xbf`^\x8e\xa7\xa9\xf2\xe7\xbf0N \xb7\x92\'\xdf\xbf\xdb\xe0\xb7S\xafh\xe1\xbfc\xc6\xd9\xce10\xdd\xbf\x12\xa7\xeb\xf8\xb9\xf8\xd4\xbf\x97X\x10\x0c\xbe\xe4\xe6\xbfF\xdc9G\xf2R\xe1\xbf\x17E\xc4\xa6wh\xc2\xbf\'l\x03y\xad&\x8d?6\x9f_\xb2`f\xd4\xbf \xc1\x17 \x93\x06\xd8\xbf\']\xdf\xef\xd1\xc5\xcd\xbf\x06x\xd7\xcc\xfc\xaf\xbc\xbfU\xe5\xac\xdd\xfe\x16\xeb\xbfL\xf6\xa1V\xbc\xf5\xda\xbf\x173\xabE_K\xe8\xbfT\xc7\x9d\x11K\xb6\xc2\xbf\x1bO;\x08i\x9c\xe4?\xcd\xedBi\x93!\xe1\xbfQ\x85\xcb\xe3\x1c\xab\xe5\xbf\r\xad8\t\x8e\xdcY?h\xca"\x15B\xd9\xa2?\x9ewO\xbf\xc3\xaf\xe1\xbf\xf6\xea[B\x19\x0e\xe4\xbf\xf0V|\xe6VS\xe3\xbf\xe7\x89\xb6<\xa3\xbc\xe3\xbf#\xbeOi\x97\x12\xdd\xbf\x1e\xc7\rU\xe6\xe8\xe4\xbf\xd7\xae$\xa6\xac\xba\xd6\xbf\xd5\x03#\xaa\x88\x8f\xe7\xbfm\xbdX\t\xeaJ\xe5\xbf\x19\x17\x9b\x07$\xd5\xd9\xbf\xd0I\xe4#$\xdc\xc4\xbf\xad\xd7\xbd\toP\xb0?\x13*\xbb\xd1\x92\x15\xd2\xbfQ;\t\x93lX\xcd\xbf\x81\xd5\xd90\xa7r\xd5\xbf7y\xe2\\T`\xc6\xbf\x1f.\ni\xe3;\xc5\xbf\xd4M[\xe8\x1e\xa4\xd0\xbfP\xe8tY"4\xa9?\x82\xa1;\xcf\xd6l\xc0\xbf\xdb>L\xcas\xf1\xcc\xbfTy\x88\x00x\x97\xc0\xbf\xdb\xbf\xfd=zz\xd0\xbf\xf1G\xc6\xd7l?\xd5\xbf\xb6\x15\xa3D\xaf\xa0\xdd\xbf>-\x8c\xf1#"\xbf\xbf!\xe8\xd2\xc6\xaeW\xd8\xbf}\xe8\x132_\xfce\xbf\xdc\x06\xfbY\x0c[\xd0\xbf\x12\x7fp\xd9z\xd6\xb3?\x91\x94\xfe\x05\x08\x84\xa8\xbf/\x05\xa6g\x8b\xf8\xbc\xbf\xb2\x85\xa5\xb0\x85\x84\xac\xbf}y\x15\xe3\xd7E\xc4\xbf){^\xb9\x97\xe0\xc1\xbf\xbe\x04\xebTu[\xd9\xbf\x11\xd6\xc6\xadc\xe2\xac?\x8aei\xc1\x98G\xc1\xbf\xc7\xe9U+\x90\xda\xc5\xbf\xd4\xef+\xf4\xd5[\xd1\xbf\x07\x01\x1e\x0f7\xe0\xdd\xbf\x0fE\xc7\xedx\x01\xe4\xbf\x03\xf2\xc6\x1a\x0cK\xb9\xbf>\xdd\xd4\xe7\xd4\xe6\xcb\xbf\x9b\xc6Q\xc0\xbf\xbe\xe2\xbf\x94\x12l\xb7\xd3T\xa5\xbfZd\x0c\x9a*+\xa8?\'\x03\x85\xfd\xffR\xe1\xbf9\xe1\xe4\x9b\xe5\xb3\xd2\xbf\xb2\xbf\xc3\xafz\x97\xad?\xcf\xbc7B\xc1\xff\xaa?\x84d\xc8\xd0\x05\x96\xd9\xbf\x19\xc1\xf8;%\xff\xc3\xbfa c\xc6\x0c8\xc1\xbf/\xef>\x0f\x93S\xd2?\xf9\x15\x07\xa6B\xa0\x8b?\xb0\xefK\xea\xb6\xa7\xa4\xbfB\xaa\x1d\x14\x01\x0b\xd3\xbfe.G\x95p\xea\xd0\xbf\xff\xdc\x83?\xe0-\xa2?a\xe58\xff\x0f\xe4\xd3\xbf\x08\xed\x0f\xc0FW\xdb\xbf\xcd\xe9\xe4\xa3(\\}?\xbc\xf7$\xe3\\\xf9\xd1\xbf\x83r\x0e\t\xed\x02\xd0\xbf\xb8}\xa6\xe7\x8c\x07\xb3?\xd3\xae\x08\x886\x13\xc6\xbf\x96G\xa0\x90W\xf2\xcd\xbf\xafvx^\x8f$\xb0\xbf~\xc3\xcf\xce\xed\xcf\xde\xbf\xfbTAr\xedq\x98?\x937\xbf~\x93<\xd7\xbf\xc1\xe1\xb7R\xf0q\xb3\xbf\xec\xca\xc0\x83\xf9H\xd1\xbf\xdf*ls\x8e\x18\xdb\xbf\x8f\x97\xe5\x04\xb3\xa5\xc1\xbf\xcf\xe4\xfa\x9aH\x13\xd0\xbf\xf5V}\x97\x1d\xa8\xb8\xbf\x02*\x1d1\xd7\xd4\x91\xbf4\xdeB|\x89\xf6\xad\xbf\xfd\xbb\x9dT\xa8\xb1y\xbfK{Tn\xe0\x92\x94\xbf.v\xcf\x1a\xe6e\xc8\xbf\x96\x15U?a&\xd8\xbf\xdc\xf9\x02"qw\xcf\xbf\xd38\xbf\xdaP\xd4\xa6\xbf8G\xe0\xbdA\xfb\xd8\xbfA!\xbc\xda\x87\x0b\xd7\xbf\xc4z2\x18\x91\xbb\x92?\xa6#y\x9d\xee\xa9\xde?q1C\xee\xbe\xb2\xcf\xbf\xb9WN/\'\xcd\xa9\xbf\xf4\xe7_WhZ\xbd\xbf\xf5i\xde\xd4;\xd1\xbd?\x0b\xe4\xf7E\xfa\x1f\x81\xbf\x1c\xadh\xbe\xc5\xf7\xd4\xbf|\xe1;%U\x15\xd6\xbfi1p0\xe0\xbf\xbf?\x02\x9e\xbeL{C\xa6\xbf"D\xe7\x996c\xae\xbf\xedP\xa2\xf0\x15\x05\xb7?\x11\xf8;4\xbaj\xd9\xbf\xcb\xbb\xa1q\x96\x14\x9c?\x9b\xa6\x7fp\xb7\x13\xc7\xbf&\xda\xa8\xd5Q\x07\xc0\xbf\xfa\xc1&\x9d,\x15\xad\xbf\xcaf\x05=E\x06\x9f\xbf\x92a\xa7\x99\xe6\x08\xa8?>\x9a\x9cg\xe7\x91\xae\xbf\xe8\xe9\x81\x05f\xd6\xb6\xbf\xf9C3\xe3\xb7\xa8\xd5\xbf\xae\xde\xaf\xfbF\x7f\xcd\xbf\x92\xf2\xa8M\xb2\xd3\xcb\xbf\xa14\xaa\xcaI\xc1\x91?#_\xf9%\x827\xa7?\xceR\x86\xb8d\xa1\xe3\xbf\xc4\xe5F\xcfzV\xc2?j\x83\x03\xafc,\xd2\xbf\xd1\xe5\x81\xd9+\x86\xd0\xbf1\x8a^A\x04:\xd0\xbf\x17\xaa\xa4\x03Z\x1d\xa4?\xff\x9d&\xa7\x86"\xcf\xbf\xe5\xdax+\\\xef\xda\xbf\xa6\xb5\xd6e\xf6\xe6\xe4?"\xc6\x1a\xa1\xc5\xee\xd2\xbf\xf6ZZ~\x1f\r\xa0\xbf\t\xd8\xac\xa4Y\xd5\xc3?\xca\x9bbLuF\xb3?|\xa7\rI\x8d5\xd1\xbf\xb0\x9c)5\xa0e\xd7\xbf\tW\xf9\x13\xc7T\x89?\x1b\x84\x85\x84\xf4\xd8\xd3\xbf\xa1F\x9d>T\x08\xa8\xbfX\xe0\xe6\x1f\xee\xc5\xaf\xbf\x97\x983\xc4\xfc9\xd2\xbf\xd4\xd2}\xb3\x8fu\xde\xbf\xc1\x14N\xc6\xfc7\xb1\xbfK9\x1a\xcb))\xc1\xbf\xf3MS\xcaN\xff\xc2\xbfKQ\x91\xd4\x94b\xd9\xbfr\'hh\xcb\xf1\xdb\xbf\xad\xef\xc4\x96\xffI\xe9\xbf;\x0f`D\xa0\x92\xe2\xbf9\xdd@\x96\xed\xc0\xe3\xbfI!_@\x12\r\xe3\xbf\x8e3o\xa4;f\xe4\xbf\x8b\x8aC\x12\xd5\xc5\xe9\xbf\x19\xd1\xa5\xf8\x1d\\\xe3\xbf<|\x03,\x86U\xec\xbf0\xe4`\x85k"\xe5\xbf\xc1f\xb1\xf6l\xba\xeb\xbf.\xa2R\x9f\xa8\xeb\xda\xbf\xa4HF\xd4\x7f\xb1\xeb\xbfY+\xcd+\xc1\x0b\xe6\xbf\x87\xe1\xd2+\x1e\x8a\xe2\xbf\xfe\x7fG\xd8\xc1!\xe9\xbf\x199\x17\x12z#\xe9\xbf\xabJ\xe7\xe2?\x95\xe6\xbf\xc5\xf9X\xad\x08\x02\xe6\xbf\xf7\xc0\x01Ma\xbd\xd6\xbf\xae\xff\xfe|\x03<\xe5\xbfU\xae\xee\xaaA\x10\xcf\xbf\x1d\x1e\x9a\x98q4\xeb\xbf\xf9\x91\xb0\xa1\x82\x02\xe0\xbf\x92\xa4A\xd7\x87\x04\xe6\xbfRY;6\xf0\xbd\xe6\xbfP\x9a\xc1\x14m\x9f\xe0\xbf\xea\x08\xf5\x88F"\xe0\xbf\xb6\xca\xe0"h\xcf\xe8\xbf\xaf%\x81{\x94\xb0\xca\xbfD\xa8\xc1gZ\xfc\xd5\xbf\x9a\xa45\x15[\xc6\xbd\xbf\x8b=@s\x19\xee\xbc\xbf\xca\x1c\x19\xd2`\x14\xe4\xbf\x0e2\xedH\xa7\xca\xe1\xbfL\xd2\xaf\xbb8\xad\xd0\xbf\x83=\xbd\xd3^\x89\xe2\xbf\x1e\x10\x98Y\xfd`\xe3\xbf\xdb\x83\x1a\xd5\xadt\xde\xbf\xe3%/\x1c\x19\x9a\xe6\xbf\xfa<xv\xcd\x15\xe6\xbf\xbb\x0c\xacZ\xfay\xe5\xbf4c\x82=\xb5\xd4\xe0\xbf\x82<\xb4\xa0\xde|\xe2\xbf\xc8\xbd\nX66\xe2\xbf\x13X\xe5\xfd\xf5\xa4\xe1\xbf\xde\x8b\xac\x15\xbb\x11\xe7\xbf\x1c\x87\xf1\x9c\xfe.\xdd\xbf{\xbc\x1c\x89\x87`\xeb\xbf\x8a|&\x8e\xc0\xad\xe5\xbf]\xaf\xc4\xdab\xb2\xe7\xbf\xbd!\x0b\xd7\x1cQ\xe8\xbf\x1b\x1d\x9f\x12\x83\xe5\xe2\xbf\t\xa9r\xe0jH\xea\xbf\x82\xf1n\xb0o\xc7\xe2\xbf\x07\xff\xc4_\x85[\xd4\xbf\x9c\x8c`O\xa8[\xdd\xbf\x941?#\x10\xae\xdd\xbf\x95B\x8eL\xa3e\xe6\xbf\xff\x82l}4$\xdd\xbf\t\xf9\xd6\x99\xdc\x8e\xe2\xbf{\xd3mF\x07i\xe9\xbf\x0cx/\xd5n\xeb\xee\xbf\x91\xd2\xa8\xe0\xb28\xda\xbf\\\xb3N\xaa\x0c\xe6\xe0\xbf\x8ef\xe0\x84\xf5\x99\xe8\xbfw\x91$\xcci\x00\xe0\xbf_w\xd1\x0c\xa4J\xe6\xbf_\xae[\x87\xc6w\xe2\xbf\x1d\xf0Oh\xd0g\xbf\xbf\xd6\xae,\xacq<\xe6\xbfi\x12\x02\x16:V\xd3\xbfuY\xb8\xec\xdd4\xd4\xbf\xdb01\x16jE\xe5\xbfl\x1e\x1a[!\x96\xe4\xbf\xcf\xd4\x84\xbb\xd1\\\xd4\xbf\x90t\xa4Q\rh\xe3\xbf\xb5x\xc6\x15\n\xbb\xb4\xbf\xd5\x8d-\x1f\x8a\x1b\xeb\xbf\x1dehU\x9d-\xe3\xbf\xeeSv\xd6:#\xe4\xbf\xe8\x97,M78\xe5\xbf\xa4H\x91\x92\x89.\xe5\xbf.\xb9\x1d9\xa0t\xc6\xbfd$\x90\xe1R4\xc7?e\xbc\xd58)\x94\xe6\xbfp\'i\x98k\xa5\xe9\xbf\xa9\xfc\xf8\x9c\xdd\xca\xe2\xbf\xea\x1ap\xdar\x97\xde\xbf\xec-y\x17\xf7\x06\xe8\xbf\xdbR\xe7\xccc%\xda\xbf\xc9P)\x9a\xd5\xba\xe4\xbf\xe2\xe0\xca_\x0bF\xe9\xbf\xd0E\xba\x01\xea\xf3\xe5\xbf|\x08.S\xc2:\xe0\xbflC\x96H\xce\xd0\xe8\xbf\x95\xb4_\x9c@\x91\xe2\xbf\x07Z&OS,\xdc\xbf\x81\x9f\x0b\xfa\xbe\x97\xe1\xbf\xd0\x07\x04\xbf\xffU\xdc\xbf\xc3_\xf9\xb1\xae\xe1\xe4\xbf\xf0\xe5\xed\xaa\xd4&\xe3\xbf\xb6\'\x94\xa6\xcf\xa2\xc6\xbf\xe3\x9fh\xfd\x9d\x9d\xd1\xbf\xb0\x08\xd5^?\xb4\xe8\xbf\xb6\x1dPOe\xc2\xa4\xbf#\x96\xbb\xf1\xeb\x7f\xd4\xbf\xfc\xc73(\x0c\x1d\xe0\xbf}\x86g\xb8\x04(\xe8\xbf>\x07\x11\xe4\xc2\xc2\xe2\xbf\x9c\x12LJ\xa2d\xc7\xbf:\xaf\xe1\x92\xa8n\xc1\xbf\x84X\xa6\xfd\xe4\xd8\xe7\xbf\xde\xe1d\xb7\x9bI\xe3\xbf\xd5\xc7r\x06F\x12\xe2\xbf\xee\xf0\xcb5Sn\xcf\xbf\x8eP\xbb\xc8\xd3\xcd\xe9\xbf\xc2\x96[\xa7\xee\xee\xda\xbf\x0f\x8aD\'\xa7G\xdd\xbf\x97\x1e\xc5\xaa\xf0Y\xe6\xbf\x88ph\xa1\x9fR\xea\xbf\xb7\xaf\xf59\xfb\xa0\xe4\xbf\xd4r\xdb\xe4\xa7q\xe3\xbf\xec\xb9\xdf\xaf0\x88\xd8\xbfH\x0c[q\xde^\xda\xbf"O$\xe1\xa0\x95\xe6\xbf\xe7\xf6\xd9\x11\xc4\xbe\xd2\xbf'
p33
tp34
bag2
(g3
(I0
tp35
g5
tp36
Rp37
(I1
(I20
I256
tp38
g12
I00
S'\xb8\x93\x18\xb7\xd9w\xd2\xbf\x11/\xfc4\x85s\xd0?\xf7\xa2\xe2D\xd8\x1e\xd2?\xa9\xceP`\xd2C\xa5\xbf\xec\xd2\xab\xa8!\'\xc0\xbf\xb2\x18D?\x9f\xe8\xe0?\xea\xd5H\xe5H\x15\xac\xbf\x0f\x84\xa6]\xf6\xb4\xa3\xbf\xc5\x80\x8a\xf2;&\xe2?\x811E\xed\x0c\xbc\xdd\xbf\xc0\xbe\x8el\xa1\r\xd3\xbf\xf0\xf7\x91\x83\xf2\xe3\xc1\xbf\x11\xd0\xa1\x81a\x12\xd3\xbfO\x87;0L\xd6\xd0?\xc4\x90R\x940\x86\xb3\xbfz\xa6\xc1V\xad\x1b\xdc?\xcc\x11\x91\xe5\xc6\x1f\xc5\xbf\xd3\xf8\xa3cXw\xc9\xbfQ%\x16"lu\xcd\xbf\xad`\xd9\xaf\xd1^\xbc\xbf\xbd\xac#=\xfe\xfd\xa9?\x11\xf1\x99a\xbe\x9e\xcd\xbf]sxG+F\xca\xbf\x15`\xf8-d\xbe\xc8?vjj\xef\xf5\xeb\xdb?\x17\xf1:\x92}n\xc1\xbf\x12\xefH\xe3\x81x\xb0\xbf\x90IO\xe9\xbbF\xb9?\xb1\xb4\xf9\\\xf4f\xaa\xbf\xb5\x86\xfc\x81\xcf\xa8\xc0\xbf\xa6\x85w\xc9l\xae\xbd\xbf\xf4H\xb5\xfc"\x05\xb1?\xea\xfdD3\x96\r\xaf?\xfe\x95\x98\xf7\xc8\xdd\xab?\x16\xec\xc9\xaf`F\xb3\xbf\x8e\xeeS\xe5\x02\x98\xc9?\xbb\x9a\x10b<\xac\xc5?\xf4=\xb2\xb9\x1f\xc9\xd1?\x8f\x14H"|\x8f\xbe\xbfp\x9b\xd8~\r\xff\xcf?G\xdf\x9a\x88\xa0\xcb\xbb?Pw\xb3\x1d\x07\x14\xe7?8\x93\xff\xdfR\xc3\xc7\xbf\x83\xce\x99v`\\t?I\xdb\xbb>8\x97\xb6?!J\x0c\xbc\xe6T\xcc\xbf:\xcc\xaa\x82\x85\xa6\xbb?\x04\xdd\xb79\x86\xfb\xc1?\xd2u\x7f\xe7KN\xbb?\xf87\x9e\xbf\x02H\xd6\xbf\x1d\xa9\xab\x04\xbeR\xbe\xbf\xc1|B\xa7\x1e\xe4\xd6\xbf G\xfc\x89\x046\xd2?\xc7\xd3\x12\xf5\x00\xe7\xa8?\x8b\x7ff-\xf6\x08\xc3\xbf\xc7o\xa2v\x1e\xa3\xd6\xbf\x97a\xb2\x97im\xb7\xbf\xba\x87Y\tP\x1e\xc9?\xab\rl@Y\xff\xb5??\xc7\x8dN\x87m\xdc\xbf\xf5\xa7dW\xf4\xee\xdc\xbf5"\x96I\x08\x1e\xe1?\x04\xe9r\xb7t0\xd3\xbf\x1c\\\xbbIL\xe3\xd8?\xc3Eth7L\xc4\xbfB\xbd7\xf7\xcb\xd3\x86\xbf\x15\xd0\xectP\r\xc3\xbfU\x15\x0bX\x91\x96\xe0\xbf\x04\xad\x13\x9b\x9d\xc2\xd6?6\xbf\x9e\xfc@\xc9\xb4\xbf\x02\x14\xac\xcf\n\x17\xb0?R6\xd4\x82\xddJ\xc7\xbf\xcc\x85\xd7\xa0\x9f\x91\xbe?\xc9\x15\x17:\xcc\x19\xba\xbf1P_x\xb2\xb1\xd3?Z/\xbdY\x13\x93\xe0?J\x18\x1b\xc3sg\xd3?\xe7\xfe\x80u7\xd0\xde?b\xc9\xb7S\x0f|\xb8?O\x1dX\xdfy\x9a\xc8?\x9d/&\xa7\xa5\x08\xd8?\xb2c\x95\'$\t\xd8\xbf\xf5\x19\xd7\xd5\xfb4\xd6?\xf2\x12\x0f\x108\x9b\xe4?\xff\x99\x06\xe7\xba\xcd\xcf\xbf\x803\xcc\xc9P`\xd9\xbf%\x13\xd11\xfe\xf7\xd0\xbfYjAO\xaeM\xd1?\xea=\x97\xa4\xb7I\xd1?\xf0T\xff\xeb\x88\x9e\xde?\xa8J\xfc\xc5\xd5\xe4\xb9?+\xb2\xee\xc7\xfe\xe8\xaf?\x9b\xcb(\x19\xac\x00\xcb\xbf\x1b%\xce\xa8U\x1b\xb4?\xd8\x83\xed\xbd\xbf\x8c\xad\xbf\xcc\xe4/\x1a8K\xca?\'\xdf_\xeel\xd5s?I\tGf\x1as\xd5\xbfjx\xd0\r\xf52\xc0\xbf\xbf\x04\xfe5.\xa3\xd3?P\\*g\x9a\x16\xd8\xbf\xd2~\x17f`\x9d\xb4\xbf\xd8ng\x13\xc8A\x86\xbfa\x18y\xe9\x18yw\xbf@=\xdd\x1b\xed[\xd3?g\xa6\xa6\xd5{g\xc3?\x06\xb6|P\xd0\x84\xde?\xa8\xed \x8f\x8fo\xba?\x0f\x91\xde\x91!+\xd2\xbf\xa6\xd0C1\xf5[\xe1?\x90\\\x80h:\xbe\xd0\xbf\x08w\x9a\xb0:^\xd6\xbfA1s\xdbx\xf4\xd3\xbfHn3p\x11\x86\xcf?\xac0\xa2\x17"\xff\xc1\xbfi\xfb@@\x02 \xd6\xbfu\xac\x94\xd2\xf5\xe4\xe0?`o\x8a-u\xed\xcc\xbf\xbb\xa8\xc7w\x05\xa8\xb7\xbf\xfcF\xdf\xf0\xd9\xfb\xaa\xbf#/\x1255\xa7\xc0\xbf*\xab\x8eu\x87\xfa\xa1?\xd9u\xfc\xfc\xde\xf2\xdc?}\xf0z\xd24\xac\xc5\xbf\xad\x07\xcf\xac\xa9\xd0\xd0\xbf?\xb5,\xba\x80\x00\xd5\xbf\xd0\x1ek4i\xb7\xdd?yEe\x8a\xfb+\xd1\xbff\xa6\xae\x84hy\x93?L\xad\xa2\x02\xe5@\xaf?\xef\xfb\xb0\xf9\x9e\x1f\xc5?\xf6\x9d\xcdFZn\xd7\xbf\x8e\xf3\xde\xc3\xca\x1f\xd8?a\xcd\x11"\x8bv\xd1\xbf\x8f \xb4\xce\xba\xde\xcf?\x93R\xa7\n\xbfi\xda\xbf\x17\xe3A7v\xac\xc1?\xa8\xf8\xb2\x07\xf0G\xd5?$,u\xb9\xe8z\xa1\xbf\xbby\xef\x07\xb7\xc2\x8a\xbf\xd8.\xab\x93\xc7Z\xc9\xbf\x84\xd2f\xf8=\x83\xab?f\xd7I\xe7\x11\xc4\xd0\xbf|\xf5\xa9\\1k\xc4?\xe7h}\xb8\x83q\xd1\xbf\x0feLqTb\xc3\xbf\xc3\xb5\x13F\x9e\x1b\xc9\xbf\x1a\xd52\x17\xf1\x1f\xbd?\xf7\xaa6\x82)\xe0\xbd\xbf\xf5\xdf\xfcd \xff\xbf?2\x88\xfe\xb5\x18j\xd7?\x0bC\x93\xe5\xf9M\xb1?\xa1a\t\xf7\xf8\x83\xc4\xbf\xb3\xc5\xa6Y\xff\x99\x9e?\xac\xf9Z\x7f\x93"\xda?#:f\x1eI\xbe\xbc\xbf\x8c\xac"S\n\xe3\xd1\xbf\x80A\xbbz\xb8^\xac\xbf\xbd!\xa2\x0c\xe5\xec\xd4?&\xd9\xe8\x82\x82\xb8\xce\xbf\x01w\xf9\xba\xb4\xa9\xc1\xbfjn\xb9\xdb@\r\xca?\x1dFY\x13\xbd\xa9\xc8?"A\x83d\xf2-\xc5\xbf\x0e\x88\xb2N\r\x91\xd0\xbf=kUfe\xcd\xd2?\xf8?S\x16\x06T\xd1?Uo\r\x00n\xce\xca?\xc2bZ\x04F-\xc4\xbfK\xcc\xf62n%\xd2\xbf`j\xe5\t\xcb\x8e\xdd?caL\xe3j\r\xd1\xbf\x9fn{\xd8u\\\xc7?i\x86xS\x11\x9f\xd4\xbfA\\\x9c\xc3E\x93\xc7?\xa5&\xe8<\xbd\xba\xcc\xbf\x05\xdd\xb8\xa8Z\xda\xca\xbf_V]^Y;\xbc\xbf\xc5\xc0\x1a\xb6.\x1c\xb6?\x07\xf8\xfa"v\xe2\xb6\xbf\xfd\x89|\x91\xe4\xbf\xc2?\x89\x06\xb9\xa1\x92\xf7d\xbf^\xfe\xeb\x14\xa5\xce\xc9?\xd3\xa1\xe5X\xa0i\xd0\xbf]\x7f#\x83\xdc\xa9\xe3??\x8b\xde \x1f\x7f\xae\xbfS\x1aL\xec\xb0r\xc9?\xfc\xa8\xd8\xed\x17k\xbc\xbf\xd6\x81b\x91\x81\xb3\xdb\xbf\xf3\xcd\x0e\x13\xec\xe3\xb6\xbfu:\xda\xf3\xd3\x04\xd3\xbfO\xa6\xe8;\xaa\x90\xc9\xbfl\xb9\xca.>\xc1\xc1\xbfx\xac\xc4\x11\x8e\r\xab\xbfL\x1c\xbf\x05jI\xe0?\n\xf9\xf9b\xc6\x16\xd3\xbfD\xc5\xd8T\n\xce\xdb?\xc1\xe2\x9e\x0bx\x82\xa8\xbfk\xa4\xd3/\xf5x\xe1\xbf\x18\xf5D?\xbe\x1f\xdd\xbf\x13&Zy\x18\xf9\xae\xbf\xc6\x08\x03\x1b\x8e\x1cn?c\r\x17\xbb)!q\xbf&\xd7p\xf1\xccs\xc8\xbf\x90\x11tYVb\x87\xbf\xe3\xc2\n\x10\xd4\xf7\xd6?\x83D7\x82,0\xaf\xbf\xb3w1\xcd\xb7\xb9\xba\xbf\xf0\x84{3\x08\xad\xea?\xd4\xd8\xb4|\x1d\xe1\xd8\xbfD\xa1\xf2\x9e\x93w\xb0\xbf=\xb5\x92\x89\x89x\xb9\xbf:\x0f\xfe\x9a\x86\xd7\xc5\xbf\x025L}`\xf7\xb3\xbf\xd4\xef\xe2\x94\xa7\xfb\xcd\xbf\xaf\x87!\xce\x16\xc5\xbc?R\'5S%\xce\xce?L=\xfa\xae`\x8f\xd2?\xefW\x0cV\xb4R\xd8?\xa6=\x19\xf3+\x14\x9b\xbf\xea\xeaMk\xd0\x95\xc7\xbf7<\xd2\xfcF7\xe5?\xdf{\xef\x1a\x15\xd5\xdb\xbf\x9e?\xf87\xfc\xb2\xc4\xbf\xb1\xa4w\x81\x04!\xcd?\xcdF\xbbQ\xaa\t\x99?\x97\xcb\x16\xa6\x90|\xcb?\xe6\x80I\xe1f\xf7\xd0\xbf\xb3\x12\x9d\xd9\xd2R\xd5\xbfv[v&\x95\'\xc8\xbfs.\xfd(.\x10\xbf?\x950\xac\xdd\xbd\x0f\xc0\xbf\xd6z\r]\x8e\xd1\xcb\xbf\x0c[BwlU\xda?\xab:\x7f\xa1\x97\xa9\xd9??q\xa3\xc999\xd1?\x90\xfa\t\xd0.\xa3\xa3\xbfQ.\xab\x15l\x12\xc6?-\xf4bp\x1b\xf9\xa8\xbf\xd5\xdeY\x13\xef\x1f\xdc?{x\x02\xeb\x9fE\x98?\x9e\x84\xe0u\x84(\xaa\xbf\x11\xc0C\xbc\x88\xac\xd1?Z`S\xce\x12\xc3\xb4?\x99\xe5\xcb%Z\x0e\xc9\xbf\x93\x8ar\xc3\xd7\xf8\xb8\xbf?\xc1.[G\xdb\xc5\xbf\x85`\xd0\xb1YF\x8d\xbf\xc2\xa3\xf0\x19\x81\x8f\xbe\xbf\xd8>\xdc\x19X.\xc4?S\t\xb7\xd2\xba\xc1\xcb\xbf\x14\x1bq\x060J\xc6?\x00\xfa\xdd\x85Bl\xc5\xbf\xa4\x1f\xb1\xc4C\xe5\xcf\xbfZh\x16\xe0&(\xc8?|\x0e#\x822n\xd0\xbfuid\x96\xca\xee\xe7\xbf\xa4\xaf\xdd\x1f\xf1\x02\xc0\xbfZ\xc4\x97\xec\xec1\xdb\xbf\'\xed\xb9\xcd\x15\x11\xde?\xe9-\xe7\x0e\xc4\xc2\xd8\xbf\xaen\r\x8d\x8bE\xcd\xbf\xd9\x8f@\xb1\xfd\xf6\xd5\xbf\x93\x1d\xc3\xc56T\xe6\xbf\xee\x82\x1b.YS\xe1\xbf\xf6A\xc5[\x89\xa0\xa3\xbf\xde)\x0c\xc6\xd1\xab\xe4\xbf\xb8,i\xa8\x91\x0b\xb9?\'\t\xce\xb84^\xe2\xbfsVE\x97N\x05\xcb\xbfLW$\x05\x1b\xad\xc2\xbfO]\xc6\xbbCr\xbd\xbf=S\x8f\xef\xaeY\xde?\xcdVP#2^\xd4\xbf\xf0\xe3s\x00\x92O\xe0\xbf\x96\xf9\xb5\xa3\x07\xdf\xe0\xbf\xb9\xea\xf0\xae\xb0\xcb\xd3\xbf\xf3\x9c\x01ws\xfd\xea\xbfd\xdf\x0cH|\x16\xac?\xfe]\xe8(Q\xa1\xc9\xbf\x8f]\xc8\xac\xf4\x18\xb3?\x90{7\x06\ndi?\xbe\xcd@\x1b5j\xd5\xbf\xd9\xde\x02\xde\x9d\xce\xd6\xbfr\xf7>c\xd1Q\xc6\xbf-\xd4\xe7*b\xee\xd0\xbf\x9f3\xe7\x07\xb4k\xc1\xbf\xd7\xedD\xa5\xdc\x0c\xe2\xbf\xcb\x05\xac\x18\n\x83\xd9\xbf\xb7\x8f\xdf\xca\x07\xec\xe3\xbf\xfc\r\x99d\xb2\xb1\xe1\xbf\xbe\xd5KJ-L\xd6\xbf\x03\xc6\x7f\xcc\xf0G\xc7\xbf@\xd2\x88\xde">\xc7\xbf\x8d\x97\x9f\xb2S\xdd\xe2\xbf\xa0\xae\xfa\t\xe2\xaf\xd0\xbf\x0fF\x1d\xc7zQ\xd0\xbf\xc2m\xfd\xbeS\xc0\xb8?\xc0\x04u\x8d\x18\xe9\xd7\xbf\xe3"\xf6\xef\xa26\xea\xbf\xd3\xaa\xdd\x8fH\xa6\xc7\xbf\x88\xa8\x84\xeb\xd0\xe7\xe3\xbf\xec\t\xbc\xb4\x05\x94\xd9\xbf\xb6\xf1=\x8e\x06\xcc\xe1\xbf2Om\xd9\xed,\xdb\xbf\xd2\xd8,;\x937\xa8\xbfS\n\'z*D\xd0\xbf\xe48\xe1\x15c\xc9\xd8\xbf\xe9\x86+\x97\x0c\x1c\xc0?\xfc\xde\xeeLUm\xee\xbf\x05\xb7\xd7e\x92v\xc9\xbf\x0b\x1e\x1c\x97-\xa7\xe5\xbf\xba\xe5\xe1\x15\xbc\xa3\xda\xbf\x9dLJ\x9b\x0e\x85\xd0?5\x9eU\xb1\xde\xec\xc0\xbf\xdd\t\x10\xaa\xde\xaf\xda\xbf}s\xd9\x90G\x8c\xd4\xbf?\x88\x86^9\xb9\xbc\xbf.M\xcae6K\xe5\xbf\xfb\xe4\xc4\xfa<\x86\xc3\xbfS]\x1e*\x94A\xd9\xbfC\x0e\xd6R\x8ao\xe0?2\x17\xb9\x9a<`\xd7\xbfi\x86\rsF\xce\xd8\xbf\xd4!\xa1\xc0\xa2$\xb0?\x83\x9f\xc1t$J\xd6\xbf\xb3E\xd0\xce\x05\xac\xea\xbf0\x8a\xf0;\xd0Q\xe5\xbf\xce\xdf\x89\x7f\x8a\xaa\xe3\xbf5\xe2\xe4\xfa\x1dt\xdd\xbfE\x08\xae\x96\x8a\xe8\xc9?\xec-\x12\x8a\'{\xd5\xbf\xdc3\xd2/\xbc^\xa9?G\xcb\x02\x17\xb8\x02\xcd\xbf\x9d\xb7\xef\x15\xd5\xee\xd3\xbf\xdeh\xd0\xc9\xb9a\xbc?\xc7\xe1\xba\xfb\xf0\x89\xe2\xbf\x8bX\xfc\xe5\x91x\xe7\xbf\xfc}\x07\xe3L\xad\xd1\xbfq\xdes\x00\xfd\xf0\xc8?\xfe\xd8{\xb6\xf1o\xd2\xbf\x1d\x94\xc6_~\xa3\xc1\xbf\xb6\xd7\x00\x93ui\xdf\xbf\xa1s\xa1\xba\x90\x7f\xd0\xbf\xd9s\xce\x00\x07\xe6\xde\xbfi\xb0\xceI\xe8l\xd5\xbf{\xd4g\xa5=v\xc3?\x05V\xc9\x0b\xb2N\xbe\xbf\xe0\xe4\xa5\x05N\x8c\xbc?\xc6\x0b2\xa4/\xc6\xcb?\x7fT\xe1vz\x0b\xe2?k\xc3^b\x11{\xde\xbf\xdf4\xad\xa4\xb5\x03\xd7\xbf\xd9\'\xbb\x9b\xab,\xd5\xbf ?`\xdc\xf4\x80\xca\xbf\xa8(\x99\xa6\xc4G\xdb?\xad\x93\xe6\xc2\xf22\xe0\xbf\xc6\x1c\x00\xad\x0f\x9e\xcb\xbf\xd8_\xd3`\xf4^\xd0\xbf-\xfb\x94\xdb\xd6\x92\xd5\xbf\xbd<\xef&~\x0f\xe6\xbfo8\x19\xe4\xb0\xb1\xe2\xbf\xfa\xee_\x1c\x17*\xd7\xbf\r\xe4\x06\xf0~\xc4\xe4\xbf\x98\xfa\xcd\x0f \xf2\xb0\xbf\x7fM \x1aW\xfa\xde\xbf\x05\xa0\xc6\x18jk\xd2\xbf\xbd;\xb5Qo\x0c\xdf\xbf\x1a9\x11\x9d\xb0m\xdb\xbfD<\xd2\xe9\x92[\xe7\xbf\xdd\xf5\xe4\xe1\xe7\x80\xe3\xbf\x8b\'\x9dT\xbeo\xc6\xbf_9_\xcd\x05\xfe\xa6?\xcc4\x85"\x9e,\xc4\xbf\x1c\xca\x13\x19.\xbe\xbc?\xce\xe1\x02\xb1\xc53\xda\xbf\xaaz\xf2\x1a\xf9\xac\xda\xbfi)\x10\x15\xba\xa6\xe8\xbf\x80c\xe5\xfdd?\xd9\xbf\xef\x8am@\xe4\xcc\xa5?\xb3\xaa\x04\xd9\xd8?\xde\xbfH\xdf\xe4v\xb7\xee\xa4?\xf7\xa6\xa8\x1e\xcbo\xd0\xbfLw\xf3;\x98\x04\xe6\xbfGd\xc4\x13\x84\xc8\xd9?\xd5NjX\xcc\xb5\xc4?\xa9\x9d\xd5\xf1\x159\xec\xbf\xf5\xc0Y\x1b\xfdf\xce\xbf1\x16\xb1\xd5\xb3\xcb\xd1\xbfL\xdd\xe9\x8c\xf1\x07\xe0\xbf*\xfb\xed\x024\x85\xe3?\xdb\xe5\xf1\x93\x0e\xc5\xd4\xbfHY\x11\xc3\xc5\x99\xde\xbf\x99FJ\xec\xa0\xbd\xa3\xbf\x9f\xe6n&Z\xda\xa8?\xef*\xfb\xdb\x97 \xae?5Yw\xdb\x1cE\xe0\xbf\x8b~}\x85\x13\x02\xe2\xbf\x15\xc2\xefJ@\xe2\xb7\xbf\xa0\xda\x07C\xf6\x17\xd7\xbf;\\\x16\xbf\xf39\xce\xbf$-\xc4\x02c\xda\xcd\xbf.\x9c\x0e\xe9\xf2\x99~\xbf\xb5\x06u\x82\xe7G\xcd\xbf\x7f\x07\x14j\x02\x9b\xdf\xbf4\xd7\nFKi\xda?e2i\xb9v\xee\xb5?NX\xd4\x10B\xce\xda\xbf\xa3\xe4\x86R\x82\xa7\xd2\xbf\x85?]L\x7f\xcc\xd2\xbf\xf3\xcf\x1e&~\x03\xd8\xbf[~\xdd\xc3`$\xcd\xbf\xb96\xfd\x92\xf9\xa6\xdd\xbf\x84\xd2\x81Q\xa7\x1e\xe2\xbf[\x15\x88\x18LG\xd7\xbf\xd2{\x95jB\xde\xd0\xbfl\xda\xe4\xb6j\xb0\xcc\xbfW\xbd\xe8,\xfft\x9b\xbf|\xd1I\x83Is\xe6\xbfL\\\xbe\xaf\xber\xcb\xbfN/\x02\xd7\x13q\xe0\xbf\x1aI\xef\xbf\x18\xbf\xd4?SmS,\xcf\xbf\xbb\xbf\x10\xb4\xe6\xf6\x1d\x18\xbd\xbf\x9f0\xb1;\xd2\x99\xc6\xbf\x8e\xc3~\xb96X\xd9\xbfy\xc9\x0cl#l\xba\xbf\xc7\xfe8\xef\xbfv\xc0\xbfwD\x18\x15\xb5\n\xe0\xbf/\xea\xebe3\x8c\xe4\xbf\x9c\x7f>\xa5_\xd9\xe3?@\x1coD\x16\x97\xd3\xbfi>W\xd9\xa1\xf1\xe3\xbf\xacp\x0c\xd1(\xbb\xbf\xbf\x93/8\'\xed\xb9\xe9\xbf\xe5\xfb!\x96\xa73\xd0\xbfk\x86\xc9K\x7fp\xe7?>M\x14J\x17R\xd4\xbf=\xcf\x04\x8bQ\xfb\x96\xbf\xfc\x83\xfc\xa7w\'\xdb\xbf\xfe\xa2\xd4\x1f&G\xd3\xbf\xf2\xa8b\xa4!D\xe8\xbfb\xf1\x15N8\xdc\xd9\xbf\x9c\xf1I&W=\xd3\xbf\xb3\xdeC\xb4y\x13\xdc\xbf\xd5\xc7\xa2\xf8\x18i\xe4\xbfX2\x9b\xb4\x99p\xe2\xbf\r\xe3\xe1S~\x18\xe1\xbf)A\x10\xba\x95\x89\xdc\xbf\xf5\x89\xa1W\xf5\xe0\xe1\xbfH\\R\x85\x1f\xb3\xcd\xbf\x0b\xc1\xea\xd1N\x07\xe1\xbf\x08:)\x9c\x8c\xb3\x98\xbf,\x1c\xdd\x06`v\xeb\xbfP\xbb\x81\xd9\x9d\x95\xbb?\xc5\xf8s\'\xac\x9f\xe9\xbf$\x91i\xff\x03\x1d\xdf\xbf\xef\x0c&S\xd1\x15\xc8\xbf\xf6\xe5\x16\xa4\xa3:\xe3\xbf!yP\x05\xf0u\xe2\xbf\x05\x82^\x9b!c\xe9\xbf\x82\xfb\xcb\x94^\x00\xaa\xbf\xfa\xc0\xc3O\x06]\xde\xbf]\x8f\'R\xd8\x00\xcb\xbf\xea\x84\x1a\xbb\x1a\x01\xbb\xbf\xdb\x1e\xee\x12\xc4\x15\xca\xbf\x88\x9c\xef\xee\xd1S\xdf\xbfh\x1e\xec\x19\xca%\xde\xbfMw\x8f\xe65\x16\xe8\xbf\xe9\xa0\xae0\xba\x1b\xd0\xbf:\xe7\x9a\x92y\xcf\xd9\xbf}\xe3D\xca\xd9\xdd\xe2\xbf\\\xe0\x04\xb1\x89R\x97\xbfGy\\\x06\x1c\xdf\xd2\xbfV\x93\x85\x1a\xa4\xc2\xbd\xbf\xe8j\x13.a\x91\xe7\xbf\x1e\xdb[\x19\x9dS\xd0\xbf[f\x8b\xbe\x96L\xdb\xbf\x8c\x19o\x04Z\xb1\xa6\xbfGD\x16\xf4F"\xe1\xbf\xc0\xe9\xb3\xc3\xf7\xf3\xd1\xbf\x08\x1e\xcaB\x87!\xc9\xbfi\x8c\xfe;\xa4Q\xc7\xbf\'% \xc6\x01\x9a\xe0\xbf\x1ev\xc6q\xd8\xa5\xeb\xbf\xbf>h<:F\xe3\xbf\xb2\xc4\xa1E\x97\xa5\xd1\xbf\t\xfa\xda?\xf3\x89\xba?\xb0n\x9f!\xde\x92\xd1\xbf\xf8\xack\xe65\x87\xce?sk0}|\x05\xe0\xbf\xbe\xcf\xb6,\xa3`\xc1\xbf\xe7(\x9a0\xa89\xe3\xbf\'\x88X\xcd\xb0\xa5\xe4\xbf\xd0\xfc\x0e`\x89\xb0\xd4\xbf\x14\x08\x94{\xa4(\x9d?f\xb5\xa6\xe2\xe0v\x95?\xee\x88\x99Y\xfe\xc2\xd4\xbfB\xf42;\xfc\xe4\xef\xbfY^`+Z\x00\xd6\xbf|\xccO2zJ\xda\xbf\x14\xf6M\xd7+>\xd1\xbf4\xf6\xde\xa5\x98s\xc8\xbf\x98\x81\xc3\xb3\x94]\xe3\xbfPe$\x90@\xb6\xdf\xbf\x13\xbc=z\x96\xbb\xd0\xbf\x0b\xd7\xf7g\xa6\x07\xe7\xbf\xf4\xb4\xd0\x91d\xc4\xe2\xbfpn\x8b\xd1\\;\xe0\xbf\x8e\x852_\xad\xb5\xe1\xbfS\xc4\x8b\xc3-\xb2\xd2\xbf\x81gU\xa6\x92\xf7\xc5?\x18\xa4\x1a\x7fA\xa2\xf4?\x08\x8f\xca\x87[\x80\xe1?\x03=\x14I\x8c\xbd\xbc?\\\\\x1f\xf3\xa3\x8b\xe3?\xf4\x1f10J\xbd\xd4?\xffQ\xfa\x0f\x88\xe2\xae?\x9e\xad\xd6Dq\x11\xdb?\x18\x86U\r\xcan\xc7?\xc9\x8d\x10\x83\x08*\xbd\xbfl\t\xc7\xba\xc8 \xe7?t\xd0\xcfc\xf1\x95\xe4?V\xb0\xa6s\x94\x11\xde?\xe1\xcb\x18)\xd27\xef?-SM\xf1A\x81\xdc\xbf7\x93(\x85\xa9\xe5\xbf?\xdb\xa1^D\x8f\x0e\xc6\xbf\xcaC\xae\x8b\xbf(\xd8?s\x1c\x17\x89wa\xe5?\xc0*\xd6G\x9b+\xd4\xbf.\x13\x0c\x1d\xa1\xf4\xc7?\n\x83\xda\xf3by\xd3\xbfD\xfb\xbc\xf4j\x98\xe4?D\x1bO\x85E\xc9\xe7?k\xae\x81\xfb+\xb4\xd2\xbf\x01+9]x\xa5\xc3?\xf8M\xbe\x11X\x1e\xe1?,\x03\xac\xf1sq\xc9?6\x8d\x075\xcfA\xcc\xbf_\xc6\x97\xbavn\xb3\xbf\x94X\xfd_\xf2=\xd4\xbf{\x01I/HO_\xbf\n\x15\xf1\x1d-\x08\xdf?\x83\xe6"\xaf\x985\xc6?\x00x\xe5n\xb0\x90\xc5?\x7f\x08\xea\xf4\x9cB\xc5?h\xcd}\x90\x0b\x06\xd3\xbfl&\xda4g\xed\xd1\xbf\x95\xa8\xce\xea\xdeV\xd6?\xbd\x94\xca;\rx\xd9?\xd5p%@G\x97\xdc\xbf\x12w\xed\x82\xee}\xc8?\xe5\xdd\xcc\xfbh\x01\xc3\xbf\xfdEZ\xb2<\xad\xf0?\xdb\xd8W\xaaA\x98\x8d?\xf5\xa0\xe0\x81\xe0\xfd\xe0?\xf7\xc7\x06\xf8\xb3vc?\xd5m:N\x08H\xc3\xbf\x89\xf4S<\x17\x85\xe9?\xc5<\xcb\x1b\x8b\xc0\xa4\xbf\xb2"\x8c\x87rG\xe4?w\xc6\xad\x9aY\xa9\xcf?\xa0f\xc4\t\xc5\x1b\xed?\xdbfeV\xe1\x0e\xd8?\xa7\x1eEK\x84\x02\xd5\xbf\xaf\xbf0\x16i\xd5\xef?G\xac\x868\x9a\x07\xd2?\x99\x14\x84VhV\xc2\xbfH\x8b\xc7t\x15\xd5\xd7?\xf3\xab\x01\xb7\xf1\xc8\xd9\xbf\xfb\x19\xf4.>e\xea?\xaca\x80\x87\xcc\xf3\xed?i\xf9\x97T\xbc\xcf\xb1\xbf\xed\xdd\x16\x14\xf4\xf7\x80\xbf\xd0W\xd4\xd0=+\xd0?\xbb\x078W\x03\xa3\xec?C\x0b\xdbLt\xc6\xda?E\x8e\xb5`\xa9\xd7\xf3?8*\x83\xda\xc0\x9c\xe6?Es\x9d\x97fa\xd9?c1\xdb;i+\xd3?=\xe1\x88$b\x0e\xcf?tv\x9b9R\xdc\xe6?\xbc\x13\x8c\xcf<Z\xd1\xbf\x04\xf5\x1e\xb0\xdf|\xd1?\xde\x05\xee\xbd\xa5c\xdc\xbf_C.\x9b\xa0\xfc\xdc\xbf\xba9z\x97F7\xd6?j\x00\xb1\x1fpY\xe1?{\xf9\xd4^\xf3-\xd2?S-\x8d\x1c\x8az\xe7?\x9d\xaf\xea\xc5\x06G\xe1?\'\xdc\x02\x1e\x96N\xed?L\x85C\xf0\xd0}\xc2?\xf0\x93A\xbbI-\xc1?\x1c\x9c\x19\x8e\xad\x1f\xdf?\x97v\x83\x8d\x9b\xb3\xe0?\x12%\xa0\xb6U\x8c\xe5?j\xbd\xd7\xaa\x0ec\xd0\xbf3C\x16\x15\xefi\xda?\xe9Y\x9f}\xfbg\xd7\xbf\x16\xed 2\x95%\xd2\xbf\n\xe2\x81=O\xfb\xd4?\x13~\x86q\x11\xb5\xe5?a\xaa\x1brF\x03\xbd?\x82c\xd6\xe1\xb2Z\xce\xbf\x97\x85\x01<d\x94\xd2\xbf\xe4\x97\r\x12\xb1\xa1\xe1?\xb7_\x8aq\x0b\xe5\xf1?Z\xea\xba\xff{\xfc\xe6?\xbcH\xe4\xdb\x8c\x11\xb2?n9\xe8;\x9cf\xd7?\xb0\x13l\xe9\xde\xae\xe5?,\xf1\xe6\xa1 \xbb\xf2?\xe6\xc7\xaeD\xbda\xeb?\x92\xe3\xdf\xf58\x19\xa6\xbf\x05\x8e\\\x8c\xb6m\xc7?\xcdV\x88\xc5h9\xa4?)A\xb8\xbdGY\xda?\x1fj\xbfr{\xe6\xec?\x840\x9e\x9a\xdb\xd7\xd7\xbf\x9e\xa7\xab\x9fY"\xf2?\xd5#\xc4J\x11\x9e\xf1?A\xb1\x19\xac\xc5\xc5\xce?\x1f\xf0\x0eO\xe2\x11\xc4\xbf\xb8w\x04\xc8P.\xcb?\x8d\x9e\x1246\xbd\xec?\x80o\xdd\xb4\xf0\x9b\x88\xbfL\x8d\x12\xb3\xd0\x1d\xab?;\x8d\x92Y}B\xe1?\x1f\xbaM\xeb\x82\x8b\xc1?\xa4\x1c\xa8\xa1I\x05\xbe\xbf\xb8\x1f\xccJYU\xe8?\x9f$#}\x11\x12\xdc?J4z\xed\xcf\x10\xe2?\xab\xdd4Q\xb8j\xf2?\xe0\xf7\xc0\t\x95_\xea?\xc0\x80\xba\xcd\xfds\xe0?4\xe4@\xb0M+\xf2?\xd52p\xd3\xf1\x80\xdf\xbf\x8a@5\xaek\xb1\xdc\xbf\x83(t\xb9[\xd5\xba\xbf\x1b\x94\x9d\r\xa6g\xf2?{\x11\x15\x91\x83a\xc8\xbf\xc1\x06\x8b\xed\x8d5\xdd\xbf.\xd0TR\x81P\xa1\xbf\xdc\x0b\x9d\x8d~)\xe2?H/\x8a8<@\xee?\x80W\xb5\xe0\x1e\xd6\xea\xbf+\xc1C\x90\x8b\xd8\xe5?\xac\x13\x9c\xfc\xdd\xd9\xc8\xbff\xb2N\xd1\xcc\x1b\xbf?O\xec\x18\x05\x88p\xe6?d~\xfd\xbc\x87\xe1\xe3?\xb2\xe2\xbf~j\x81\xc1\xbf8L\xd0\xdaT9\xe5?\xfct\xcbW\x07\xed\xbc?8\xda\xf2\x7f(Q\xe7?\xe6\x98\x8f\x80\xdf\xc9\xeb?&\x00\xaf\xa5\x90x\xf0?\xf6\x9c\xaa\xfb\x14W\xe3?M~c\xea\xd0\x9e\xd5?\xfb\x00\xeak\xfed\xb8?\x92\xdb\xdf<\\\xad\xe6?b\xa8\xc6\xa4\x00\xf3\xbe\xbf\x18\x0c6\xa2\xe5\x07\xb9?\xb1\xf9\x05\xfb\x04y\xb1?\x15C\x91\xb3+\x1b\xe6?\x9e\x84\xec\xfe2\xa2\xd7\xbf\x1b\xe4_al\xc5\xe9\xbf&\x94\x15\xdfF\x7f\xd2?\xdc\xcfI\x9fC\xb7\xf0?J\xbc\xe2\x81_\xbd\xa2\xbf\xeafJ\xb8z\x00\xc4\xbf3\x18m\xef\xc4\x8d\xe2?\xce\xbcW<\xa4"\xe3?\x01w\xbe\x8e\x8eu\xc5?8$y\xc0\x8b\xe6\xd1?\xa13\xf7\xe2\xf1\xca\xdb?\xa4\x07T.\x7f\xfc\xe7?T\xfbt\xc5\x1c\\\xea?z\xae\xed\x04J?\xb8?\xd4\xdc\x8a\r\xa60\xf4?\x1a\xe3ka\x9ex\xe1\xbf]F\xa9\x99\xfd\xc5\xd9?D\xa5\xde&\xc4\x13\xda?\x06\x9c\xe3\x9b\xe4\x8f\xdf?\xfc\x81\xd9"(\xf6\xc4?\x80.(\xf3+\x90\xe3?a\xc6\xcf7t\x1c\xf1?\x8c\xe5\xceV\xf2\xe8\xf1?CU\xd7\xc5\x85\x92\xda\xbf\xc5\xe3\xaf\xd4NX\xf5?\x8aym\xc0b\xd7\xde?\x87d1\x11^9\xd6?T\t\xcb\xf1\x86O\xde\xbf\xcbJ\xb4\xa6\x89\xf4\xe9?e\xd1\xbc\x83w\x8e\xc2?\xed\xfc\x8e\xc65\x1d\xdb?/z1\x00\x87y\xf0?\xd3\x19\x924A4\xe8?Y\xadp\x16B\xba\xe8?:\xae5{\xefs\xec?\xf8\xf4\x86|5 \xee?p{\x81:T\xd6\xd2?\xea\th]\xb3\xdd\xc7\xbft\xccfj\x8cb\xec?\xf9Rg\xc5\x81_\xd7?\xef\xee>\x01\x8a\xde\xc8?\x02\xe1\x19\x07\xd2\xef\xb0\xbf\x85\x15\xf5*>=\xe2?\x93G\xec\x03\xbd_\xf3?}\x93|{\xb3H\xe1\xbf3K\x98\xf2\xc3q\xe9?\xac\xb5\xa5\xe8\xad\x1a\xf0?\x04\x12\x8f\xd8v\xd5\xa1\xbf\xb0\x0b\xe6K09\xd2\xbfG`\xa8S\x0b\xd1\xd5?\xa2\xc0c\xf1\x12Y\xf1?\x060L#\xf5\x02\xa9\xbf\xbb\xaf\x07\xdd\xd4\xe1\xf2?q,{e|\xd0\xee?\xd2\xf1\x00\x9bFK\xd9?M\xb9^\xa2\xaaP\xe9?]\x0c\xc9\x7f\x96\x03\xe0?\x08\xec\xa1\xee\xeb\r\xe8?\xfd\xb2\\IGA\xc9?7\xba\x92\xfa\x04}\xe4?\xf4\x1a\xae\x98\x9fg\xd9?X\x7f?\x9bG\xac\xca\xbf\xd55"\r\xa72\xde?C\x95\x8c\x9e\xa3\xb4\xc4?\xed\xcc\xf4\x19\xb2:\xc7\xbf\xa0\x8fUF\xbc\xaf\xdc?9t\x7f\x81^o\xf1?\x0f\x1a\xb4\xce\x7fL\xc8?\xba\x1d\xb8\xa9W+\xea?\xf5\x0f\xcd\xd3\xad\xfc\xdd?\xb8\x97\xab\xa3{C\xeb?@o1\x93?$\xe5?\xd7C\x11\xc2\xd9\xbc\xe0?\xb4X\x9d\xeb\xb0D\xdb?E\x0b\xb2avN\xde?\xf7V\xcd\xa4r\xd0\xf1?h\xc9$\xc7\xb1P\xaf?\xb9\xe1{\x00Z\xda\xe0?\xe5\xedc{\x1b\x8f\xe9?,\xf0\xa65\\\x88\xf2?%\xe7\xe9\x14H4\xe0?v^K\\K\x0b\xd1?\xbf\x1f\x9c\x9f\'C\xc2\xbf-\xdc\x9e\xe5\x9c[\xd0\xbfl\xc1U\xa9%\x1e\xd2?j\x1cm\x8eSQw?\xc1\xc8\x05\x83>.\xea?~\xaa\x98\xc5-\xa3\xf0?=\xfb\xe8\x8dV\x95\xd2?K\xdb%.w\x97\xf0?\x8aM\xf2\xfa\x83u\xd1?gUO\xf2\x05t\xea?n?O \xe6\xc4\xd3?Tj\nR\xe4\xff\xcd?\xb7#/\rl\x1b\xd9?*\xc0\n\x8d\xba\x04\xe7?\x9c\xcb\xfc\x82-\xcd\xed?\xb8]ndQ\x13\xe2?\xc4\x85\xd6y4\xfb\xe7?\xea\xb0\xfe\x13\x92\x88\xea?\xa0\xbe?2\xaa\xa9\xd1?\xfa\x7fS\xc8P\xde\xe2?\xccV\x99)\xb26\xea?iQh\x88\xd7\xd1\xe0?r\xe9\x04\x82\xd5\xd9\xde?\xa2&\xd0\x82FO\xec?\x18\x844#\xa4\x02\xef?\xf3.)\xae\x95n\xb5?oy\xb1\x7f\xb1\xfb\xd8?\xa4\tvB\x9b\xb8\xe4?\x1e\x9e\xdd\x99\xa3\x9f\xeb?<\x8b\xf0;\xc7\x17\xf1?\xe0\xb6&ag\x18\xdf?)c\xd2\'\xc11\xe9?\xa0$\xa6\xec\xd6\xcf\xd0\xbf\xe79\xda\x99\x01H\xe1\xbf\x0e\xfa\xcf\xe4\x8b\xbc\xeb?~\x85)\xd4D\xe1\xd7?#\x1c\xefd9!\xd0?\xf6\xd6\xac\x96$\xad\xbd?\x85c\xae\xcd\xc0\x89\xdd?\xaeV\x9cd\x10.\xf2?\xa2\x98gA\x87J\xd0?\xf3\xf05\xb5W\xc5\xd0?\x84%V)\xe0\xbe\xf0?\xe5}\xdef5G\xdd?\xf2\xd6<\x04\x95^\xa9\xbf\x16\x00\x1e\x1c\x03\x1f\xec?\x11wY6Q\xfd\xd2?\x9b\xad2`\xc7o\xe2?\xb5K*\x81W^\xe2?\x07\x8d"C\xf1\xe9\xd2?\xf5;\x83\x14\x9e\xfe\xe0?\x16\x06X\x85G\xbd\xe1?\xdf\xce,\xdb\xec6\xc5\xbf\xf3\xb1u5P\x08\xe9?J)y*\xd7\x03\xf2?(s\xcb\x06fr\xe0?\xda\xb3\xd98\x17\x9c\xf0?\x9f\xfdfq\x89(\xdd?\xc3fS}+\\\xdc\xbf\xf8BY\xf4\xf2\xce\xe9?>\r\x883B\xe6\xd9?/\x16\x98\x07C\x93\xf3?\xad\x16 <\x06Q\xf1?\x00\x04\xcb\x18\xb2)\xf6?K\xeet\xc0]~\xf8?\xe0X\xd5\xb9\t\x96\xd4?\x1b\xb7\xde\x94,\xe9\xde?\xc8\xdbU\xb0\x1fk\xe0?\x9d\x01P\xe2\xe0\xfc\xef?a\x1bwC\xcc\x07\xe4?\x04\x94\xba6\x01\x82\xb6?9\xa9\xb5\xa8\xd4\x16\xe0?\x9d\xca\xf0^^\x06\xe7?.\x82\x94.\xb6\xcd\xd5?f\xbe|#,\x9a\xc7?W\xa8\xe7\x9b\xc8\x86\xe4?A\xc1\xadI+R\xed?\xfeL\xc2\xa4\xd6\x83\xee?3tLL\x80u\xe0?\xb14\x06\xc9k\xbe\xd3?\x8c.\x8c\xd4\xef\x01\xb2\xbf&\xbd\xf5\x10\x03\x0e\xef?\x8e\xd9\xde@\x83{\xe1?J\x93\xa0\x82s\xfe\xee?\xd0\xcb\x06\x95\xc7\x8e\xba\xbf\xd1\xe0\xc3\x97\xdf]\xca?}\xd9q\xc0E\x99\xd6?~\x8a\x91@\x81\x0b\xe4?\x1c\xdd`\xa2;R\xe9?\xf4\xf1\xb9\xe5\xb3:\xb0?\xb3\xfct\xd7F\x11\xe5?q\xa3\x9d\t\xec\xbd\xbc\xbf\xbc\xa6s\xc9\xef\xe1\xb5?\xb3\xbd\x8c\xf5t\x91\xc0?\xc3[\x14_c\xad\xf0?\xad3\xb7Kd"\xdc?\x83\xa7+\xb4J\x93\xdf?d\xb1\x89\xa2\x8c\xc4\xd2?\xe4\xa3\xd6B\x9c-\xae?\x1a.\x81\xbd\x10\xb1\xbf?\x8d\xb4\x90\xc5\xf0\xc3\xd3\xbfE\xbc\xc4\xfc\x8f\x00\xf0?\x85\x87\xae\x877.\xec?n\x17\x1atK\xef\xd3?SpK\xf7m\xe3\xf9?\xd8\x05g:1\x96\xa3\xbf\xd1\x05`@\xed\xcb\xac?6\xff\x9fg=\xdb\xc1\xbf\xf1-\xe1\x910^\xe0?\xc2K\xda\xbd\xed\x9c\xf2?\xd5\x1a\xb2\x89\xbf\xf5\xb5?\x89oH\xd2\x02e\xa7?\xe0\x02ra\xa3\xb6\xf1?\r\xd6\xf0\xd8.\xd9\xee?\x00\xce\xe7\xfdT7\xf0?\xc7PC&5\x8d\xf2?\x1c\xc5-\xde\x1b>\xc9\xbf"\xeb\xc4v\xd1\xdc\xd6?5\x11\x02\x93\xb6\'\xde?\xda\x00-\xa7\x95&\xf2?\xb0p\x9e+\x1f\n\xed?\x15\xefu\xd6\xbf\x9f\xcf\xbfp\x15\x99\xa6\xb0\xdf\xc9?V<\xa5\xcfD;\xe1\xbf\xda\xca\xfc+y\x9b\xd0?\xe5\xf6\xfb\xe3\xed\x97\xef?\x1ayp0\xf9n\xe6\xbf\x8f\x19\xce\xe9\xb7\xe2\xe2?\xcb5\xbf\xc3\x06\x92\xed? \xd3\xe8\xa7\x91\xe7\xb1?Z\xa2\xa4\xd4\xac\x0b\x9a?86\x98\xdb3-\xda?D~\\B8\x1e\xf6?\x8e\xc3\x07`s\x1d\xd5\xbfl\xbf27\xaaz\xb5?X\xf7\x96\xcb\xb6\x10\xe6?\x03\xb7|\x870\xcb\xd4?\xb8\x04\'\xe5\x1e\x1d\xdc?\\\x1c5p\\\x1d\xc4?u\xe5\x87\xad+d\xb6\xbf\x9a\x8c\x1e\xbe\x8fL\xeb?^b&\xc6\xf2\xc2\xe0?\x9e\x8e\xad\x81\xf4\xd1\xe9?\xc7;\xc2\xc6Tj\xcf?\x90q\x9e\x112K\xc7?\rB\xcaG[1\xe4?\x87\x85=\xca\xd0\xa4\xe2?\xc4\xc7|u\xb1f\xca?\xff\x1e\xa9N\x15\xdf\xf0?\x16;\x91\xb6\x07F\xf8?!\xb1\x99\xde\x0f\xd1\xd4\xbf\xc9\xc2w\x18\x1c\xe1\xd6?\xb8mn\xcb\xc3O\xec?\xa7\x88\x1a\x83\x9b\x8a\xc5?\xa6\xbe?\xf8\xee[\xd9?\x9c\xe4B\xe8\xb6\xd4\xea?l\xed\xc9\x80\xc5C\xe0?\xbc\xbd\xb5M\x94\xaa\xc2\xbf\x16\xda\x7f\x84Y\x9c\xe4?\xcd\x977\n#L\xee?M:\x0b\x85\xdb@\xae?]\xb8\x90\x0f\x1d~\xe4?/gJ\xe9\x94\x7f\xb6?\xa4\xd5\x0b1jV\xf1?;n\xfa\xf0w\xe1\xf0?/a\xd8\xb7\xb6I\xf0?L\x9c\x16\xe1\xf7V\x87?\xf8\xd1\xcd\xcc*\x92\xb7?\xbe\xfa\x1e\x8dN\xb5\xc8?\xe7\x94\xc7\xc7%\xb3\xe2?\xc9#\xb1\xe7\xd7,\x98?\x8f\xea\xee9|\x00\xc7\xbfk\x96\xd9X\x0e\xa6\xd0?\xa3\xeet\xc3\xaf\xb1\xe9?\xa7\xca\r\x11\xdf\xc8\xc2?\x05\xb4\x08\x9c\x1a,\xb9?y\x95o\xe0\x8f9\xd1\xbf\xd92N\xc5]s\xec?\xad:uq-\x94\xb5\xbf\x1f\\\xd6I\x06\xd0\xe1\xbf\x04\x13\xb4\xb3\x01\xb4\xe1?\xa6\xba\xf9\x99\xf3U\xed?F?\x10\xee\xebN\xd4?\xe7h\xc9\xa2BX\xde?\xc7/\xac\x07G\xf1\xe1?\x9a\x91\x93\x04\\\x88\xed?eu\xff|Jc\xee?[\xf3aGd/\xa9\xbft\xdf\xbe\xd9s\xde\xef?\x82\x9b>[\t\x9a\xef?\x15\xaa\x7f\xfc\xd5\x11\xeb?\x80\xa1^\x97\x01\xf0\xe2?\x12\xec\x97\x98\x9e]\xeb?\x81\x1b$\xcf\xd6\xaf\xd5?\xc5hl\xf7\xb6Y\xe7?$\xd3FH\x8f\xcb\xea?6\xa1l\x16\xa7\xc8\xf2?n\x89\xa9(\xf6?\xab?\xccH\xad\x90\x81Z\xeb?)\xceB\xf8\x9cz\xdc?\xb6\xd5wD\xe0<\xe8?\xdc B\xfe\x105\xe6\xbf\xee\xba\x84\x08\x99\xea\xf0?>\x13\x87\x1d\xaa>|\xbf\xfeVL\x1d\x07q\xdb?@\x85\x8e\xe6\x97\x8f\xed?\x94\x00F\x1e\xad\'\xf1?\x90fYz\xf2$\xd6?$,\xb4\x9f\xd7\xe0\xd9?U\xbf\xba,~\xc8\xf0?j0\x8f\xa1\xc6g\xf3?\xfaLI\t\xf3\x9f\xcf\xbf\xfaE\x95`\xf5\xd9\xf2?T\xear\xefhk\x90?\x8c\xf8\xcf\xef\xaa\xd9\xd5?%XyMc\xc3\xd2?]Y\xea\rlv\xd4?\xf1N\x03\xedW\xe7\xee?4\xa9\x8cf\xa4\x97\xe8?\x11\x8d<^\x14\xbf\xe4?nLs\xaee\xb6\xf0?\xf0\x8cq\xa4\xea\xcb\xd7?\x1d\xa4\xd9\xc9,\xfe\xe3?\xa3_\x85\xe7\xd8,\xf2?]P\xb3\x87u\xb9\xf1?\xcb\xae\xb2\xe2\x9dz\xc9\xbf\x99$\xd3\xdfzE\xf4?\xe0\xfa\x87\xb0\xcc\xaa\xda?\xa4\x005J\xbf\xc6\xe1?\x87[\xcf\x84E \xd9?2\xf5\xfe\x10\xb7e\xf0?<\xd1\t0\x07\x1a\xe5?]\x95\x83 \xd1\n\xdc?\xbe\x04\x86w\xb5\x16\xdf?\x90<\x92@\xb0\xb7\x92\xbf\xc5\x10y\xb0\xb9b\xdb?\x98\xda\xbb\x0f#$\xc7?:\xa9/\xb7\xba.\xb4?\xd3&\xafWWA\xde\xbfo\x13Oj\x05\xdb\xe9?P8v\xad\xd2i\xd3?\x9a\xf4#\xb7\x93%\xcc?_\xf7\x84I\x1a\xaa\xf1?\x82\x0b\xa4\xe8\x9aA\xef?\x95\x0fq\xce\xfe\xa9\xf0?\xc0\xdb\xe3\xf4\x8d\xe6\xe9?\x05\x8c\xf0\xaa\xb1\x86\xe8?\xdc\x077\xbf\x94\x00\xd9?X2<"\xfd\x01\xe4?\xe5iCo\x96\xfa\xea?\xd2\xa2\n\xc3\xf9\xf6\xec?\xdd\x80p\x16,%\xe9?V\xed\xd4\x9b\xe0\t\xe7?1\xec\xc87\xc9\xa5\xeb?\xd9\xee\xa1\xd8s\xad\xd6\xbf\x1b],\x8eC\xfb\xcd?\xd0\x8f\xc00\xdc@\xb8\xbf\xf1RMs\xde\xa6\xb7?+\x80q\x94@\xd2\xdc?E\xc2\x84\xf04\x01\xd4?!\xe1\xe7j\xba\xcc\xd1?\xda>\x8b\x88\xc2\xc4\xec?^\x19\x01"\xfe\x81\xdd?oE\xf1\x93Wv\xda?v\xd9\xb0\xa8\xfb\xd4\xe1?#l\x90b\xcb\xe1\xee?\x16-\xdds\xe2\x0c\xe7?\x121\xb3\xa14\xbc\xec?\x94ha\xdc\xddh\xc1?\xed\xf5\xc1\xa5\xa4<\xf0?\x08\xab#\x1b\xf3\xf7\xf2?\xabS\xab\xc5\x81|\xf5?\xd5\xec\x9a.\xf7\'\xe8?G&\xbd\xebm\x1c\xd1\xbf\xdb<x\xab\x0c\xae\xd4?\xa2\xb7\xdf\xe1\xd9V\xad?"i\x13i~\xa1\xd7?\xcd\x06o\xdb\xe4\x8f\xc0\xbf\xc8H\xb6\xf8\xf9\x80\xd7\xbf.>\x8b\x14U\xfa\xa7?\x04\xf4\xbf\xc0\x96h\xd6\xbfJoP\xd5=\xb8\xce\xbfu\xe7\xbaP1\xd8\xad\xbf\xb8r\xc4]\xa6\xb8\xd2\xbf\xd40Q\x95\ni\xc3?\x84BE\xbd\xf2\xf0\xda\xbf\x7f\xe9\xfbx7H\xd5\xbf\xc9\xb0\t\xe2\xc9\xf2\x84?\xe1,\xa4\xb1\xcd5\xce?\x93`\xe4\x83we\xe1?\x97(\xa0.4\xf5\xc0\xbf7\x95#\x07\xa70\xde\xbfX\xber\xcb_!\xdd\xbfN&\xb0C\x88\'\xd7\xbf\xa6\xb8}1\xe7\xb2\xdb\xbf\x13Yi\xda\xd1\x92\xbd?\x8eQ\xcbc\n\xbf\xb6\xbf\xde\xd0LtD!\xd5?\x0bP\ru\xfe~\xac?\xd2\xdf\xa1\x1f\xe3\xde\xb1?\x1e\rH>x~\xc1\xbf\xc6!\xb0\xe5\xec\x1e\xe0\xbf\xcd\x07\x07\xf8\xc3\xbf\xc4\xbf\xf3>\x1a/.\xab\xa9?\xb3\x83*\x0cZ\x07\xd4\xbf\xf0Ys\x01W\xcf\x92\xbfF\x02|\xdd\x82\xb0\xc1\xbft\x98P#-Fa?\xed\x11>j\xae\x84\xce\xbf\xe8deV/\xd0\xba\xbf\xaf\xd6\xe0\xf6z*\xae\xbfw\x90o/\xec\x83\xcc\xbf,r\xe5\\\x0c\xca\xdc\xbf\x9a\x91\xbf^\xfb\xde\xb6\xbf\xd6\xbe\xee?\x10\x8e\xc8?v"7*$\x1f\xc0?,\xa01(~\xbb\xd1\xbf\x08\xff\x08\x82\x80\x8c\xd1?\x917\x9dP\n\xd3\xdc\xbf\x03BYn\x10\x19\xd8\xbfQ\xae\xceE\xdd\xe4\xc7\xbff\x0e\xc0l`O\xd7\xbf\xd2G\xec\xc6\\.\xc0?A=\xc2\x03\xf4\x0e\xa9\xbfb\x08\xdc<F7\xba\xbf\x8a\x04\xa6|\xfe\xd8\xcc?\xb0\xd7\xb4f\xa7p\xe1\xbf\xa6\xf4\x8c\xaf\x86V\xb9\xbfx\xfew\x0fO\x02\xce\xbf\xa5\xe5\x8d\xb0\x99\xac\xaf\xbf\xf9B\x1eW\x1dB\xe5?\xbdt\xfbn\xa5\xd3\xdf\xbf\xea\xbb6\x9ez\xf9\xcf\xbf\x1c\x9e{\x10\xb1\x89\xcc\xbfy@\x0f\x8b\xd5&\xcf\xbf\xc8\x14\xd0\xb3H\x1c\xd1\xbf\x8e\xe9Y4^\xc1\xb1\xbf\n,*J\xda \xac?\x84\xe2B\xeb+5\xe1?8$[X\x9f\xb6\xaf\xbf\x82\xc1E\xd9K\xd0\xac\xbf\xd3q\x0e\x1cY\xcc\xd4?\x19\xd9Uu\x18\x0c\xb4\xbfL,6\xce[\xdd\xdf\xbfU\xa5\xa5\x8a\'\xa1\xd4\xbfJ"r\xb8\xc9Z\xd2\xbf3\xac\xec\x8b\xa9\x98\xd2\xbf\xc95$\xa4\xb7M\xd4?\x0f^\x1d!\x8aZ\xc5\xbf\xdc\xc8\x8cZ\x00$\xca?\xf39&\x1b\xa5\'\xd0\xbf\xa1\xeezYc\x17\x91\xbf\xaaXv\xd4\x8f\xf0\xbb?V\xcb\xd1\xdf\xd5?\xc4\xbf\xc7&\xa1\xe5SD\xce\xbf\xeaY:\xc6\x88\x01\xb5?5\x92<\xd1\xcc\x15\xdd?\xed\xca\xf1S\x9d1\xbb\xbf)\x83Cp\xc9\xf8\xc3\xbf\x1f\xcaz\x08*\xbe\xcf\xbf\xdf\x81)\xdcn;\xd7\xbf%)\xb8x\xa0\xbf\xa2?@|\x1f\xc4M\xc2\xc1\xbf\xa5Tx$)"\xad?Ma\x82\xc6\xd4\x8a\xb3\xbfL\xa7\xb9k\x88z\xc2?\xe3X\xbc\x07\xc6m\xdd?\xd7\x97\xf0/\x7f\xd1\xd9?\xc6\xf5\x0f\xd0\xa2(\xd4\xbff\xf9|\xa5[\xeb\xd1\xbf\xdfroS\xad:\xc3\xbf\xbb\r\t13\xcb\x9a\xbf\t\x99}\xe5\xb5\xee\xe1?\xeeD\xffbTX\xbc\xbffg\xb7i7\xf1\xd3\xbf\x92%\xec\xbf\xec(\xba\xbf+\xe7s\x857\xbf\xc3\xbf3\xdf"\x1eJ\xed\xd2\xbf\xc1qu\xe0+\x96\xce\xbf*\xa7\xe6\xeb\xe3<\xc4?\xc7|\xbd\xa3\x85\x12\xda\xbfZ\x04\xc5\x1e\xd7\xeb\xb1\xbf\xe3C\xd4o\x01Z\xbf?YM+\x80\x10}\xcf\xbf(@\xdb}M\x95\xc9\xbf\x93\xa4\xb7\x95\x91\xe8\xda\xbf\x08\x00\xaa\xec\xe7\x18\xb4\xbf2J\x89\x16\x84\xec\xcd\xbf\xa6\x85\x8e\xa0t\x94\x9e?2N\xa9"\xa7,\xd2?\x11\x95\xd1Q1=\xb8?\xc69\x9e\x7f\xb4\x9d\xd2?\xfc\xc7\xc6uO\xde\xd1\xbf\xb8a\xb2\xac\xceR\xc5\xbf\xa9\x85s\xb0\xd9g\xc4\xbf\xa3\xc6\xed\xc6"\xcc\xbb?vhs7b\x9d\xbd?\t\x99\xc6\x9at\x1c\xcc\xbfP\xb3b\xb9\x80G\xb8?\x92\xb5d\xa1\xfb\xfd\xd0\xbf\x14"\xfd\xfe\x03\xcb\xbd\xbf\xf2S]\xde~\xa4\xba\xbf\xd3\x1d\xd3?\xe6%\xcf\xbf\xed\xa9\xda+\x18\x82\xba\xbf\xaf\x87\xd9h\xb11\xcb\xbf\x0c@\xab\x07#\xbd\xc3\xbf\x84N\xc4UP\xc8\xda\xbfx\xca\xa8.\xbb\xee\xbe?6\x05!\xc5r\xea\xc1\xbf\x1f`\xebU\xff\xc6\xaa\xbf\x17J\x82ds\xd0\xcf\xbf{\r\xdfD\x8c\xbb\xad\xbfq-\xc8\xd4\x8b\xd6\xaa?\x0b\x1b\x88\x98\xc4\xe0\xa4\xbf"\xcd=\x96\xc2e\xd0\xbfOD\xe7\xb1\xe7X\x9b\xbf\xc80n\xc3&\x8f\xc6\xbf\xd9\xbdD\xf1\x1b\xda\xb3\xbf\xf85ki`1\xad?\xeb\xe3\xecz\x99Bq?~&\xef:\xa8\xd4\xb2\xbf\x89\xab^u\x90s\xd5\xbf0\xc7$\xac\x0f\xe9\xe4?\x95\x16y@\xc4\xe6\xd1?<b\xe2\x81\xac\xa1\x90?]\x8f\x85eL\xaa\xca\xbfEb\xb7\xe2\xd0\x88\xac?\xb7\xcas\r\xc0\x88\xa0\xbf2\x17\xed\x8e\x11\xc3\xb1\xbf\x9bo;gh\xed\xd2\xbf\x0f}\r\xfc\xe5\xae\xe1\xbf\xce\xd8\x00|>\xbe\xc4\xbf\x91xH\xdf)_\xdc\xbf\xfd\x18\xa7_\x0b\x83\xa1?\xf7\x95?\xfb\x04?\xb0\xbf\x88\x03;j\xbc\x97\xd4\xbf\x82U\x85\xba\x19M\xba?\'\x94\xd4\xc0|\xd5\xd4\xbf\x1c]\xc7\x7f\x02=\xe0?\xebF\xe3G\xcbe\x90?\x07\xbcNo\xa9\xc5\xbe\xbfBB)\x81\xc0p\x8f?\xb0^\xd9]\r\xaf\xcb\xbfl\r%\x97\xd1=\xac\xbf\xa8\xe2\xc72Cz\xd1?\xd6\xfa\xc1\xb1\x13m\xd8\xbf\x97\x9e\xc7\xde\xda\x0c\xd7\xbf\x8d\xe0\xd8\x10?\xdf\xe1?\x05\xc1Y\x1b\x92p\xc2?\xcd\xa0\xdc\x9f\xea\xf6\xcf\xbf\xe0=R\xed\xca\xc9\x93\xbf\xc1<Z\xde2\xf1\xdc\xbfX\x99KR\x8f\xd4\xa2\xbfi\x99k\x16\xe4\xb5\xd1?\xd6cI\xf3\x8f)\xb1\xbf\xba\xe9\xd3\x08\xcdl\x99?_\xb7\xea\x19\xbfo\xb6\xbf\xadg\xdf\t\x86-\xa7\xbfi\x9c\xef\xd5\xb9.\xa7\xbf\xd0\xe1\xfe\xb3\x02M\xb9\xbf\x7f\xbf\xce\xc3\xf1\x85\xd1\xbfxp\xc5a4X\xc9\xbf\xf7\xa8\xeb\x17:(\xd1\xbf\xbbK\xfc\xe8\x9b\xc9\xa0\xbf\xde\x97gS\xc0\xef\xb3\xbf\xad\xd7\xbbZ\xda\xc2\xd5\xbf\xf0r\x96Q-R\xcf\xbf\xd0\xd3#rU\xac\xcf?\xf8\xac\x9d\x98{\xe9\xc9\xbf3"\xf7\xa0\x1a\x84\xcc?}\x80\x80\xcc\x1e\x11\xd6\xbf!\xb2\xe3\x15\xc9\xed\xcf\xbf\\\x91}\xb0\xaa\xdb\xcd\xbf\x83qH\xf1\x8f\n\xc8\xbf\xe5H\xba\x85\xdcN\xc4\xbfJ\x00&\x97\xe7\xba\xc0\xbfI\xa3\x13X2\xaf\xce\xbf\xf0\x95\x90\xd5||\xdd\xbf\x813\xb7tD.\xbe?\xf3;\x92\xdf.\xc6\xd8\xbf%\x86}\x18\x83\xa2\xb0\xbfQW\xef g\xc7\xb2?\xe2\xc1">\x85\xb0\xc2\xbf\xd1\xe0\xb0\x84\xd5\xa2\xce\xbf\xc7\xe9\xbb\xb2\x05\x01\xd1\xbf\xc0\xdfN\xf4\xef\xd7\xcc\xbf\xd3\xfesf\x88;\xbd\xbft{\x8e\xdc\x15\n\xcb\xbf\xc9l\xa5\x96yT\xe1\xbf\x8b\x02\xf5\xc2`(\xc8?\xeef\xe3\xb5\t\xb8\xb5?\xd7\xca\x19\xd6\x88\xa6\xca?\xe8\x80F\x9dNY\xad\xbf\x81\xf3\xaf\xd3"-\xc9?\\\x9a\xe9\x06~\x18\xb5\xbf\r\xd6C\xc4\x11\xb8\xd8\xbf\xa9\x83^\xef\xae\x07\xd3\xbf6\x0fH\xaa\x9e\xa9\xd0\xbf\xe9\x96\x1e9\x94\t\xc3?\x9c$\xfd\xbe\x0e\xae\xb5?7\xf1\xc5\x1an&\xdb\xbf\x8af\rC\x9b\x95\xd9\xbfH\xa5\xaf\xb7)\x8a\xda\xbf<\xaef\x15\x14\x0f\xc2\xbf\xe1y\xccLr\xa2\xca?dL\xfa\xbf\x1fr\xc9\xbf\xd7%\xd3\xd8\x9c\xfe\xb1?\xf5L\xb3]!\xb3\xc4?D~9\xf9\x83\xa8\x87\xbf\x1a\xc7\x9c\x9a\n\x90\xd5\xbfr\xd4\xbd5og\x93?\x0c\xe0\xc4\x87HA\xba\xbfr$%6\xa4(\xcb?\xaa\x81\x11\xa6\xac\xb4\xa4\xbf6\xe3\x86\xd38\xdd\xb6?S\x8bS\xb0\xaf6\xd4\xbf\xcb\xdf1\xf7\xf5\xe5\xcf\xbf\xb5\x01(#\xa4\xb2\xb7\xbf\x8f\xd8?\n>O\xa6\xbf\xa53KC\x9f\x01\xe0?\xder\x9b\xd2\xc5\xee\xcd\xbf\xab\x14\xa8\xab\x1aa\xd3\xbf"_w\x7f\xb6\xf2\xc1\xbf\x04sV\xaf\xcf\xc2\xd6\xbf\x80\xd2q\x00\x83\xb2\xb7\xbf&\xdc\x10\xc1\xe4\x0f\xcb\xbf\xd6\xf2-t\xb5\x87\xc2\xbf/Z5\x8cv;\xcb\xbf\x00\x1c\xael\xd9\xfb\xa7?\xd6\xec\xed\xd4\xcc;\xde\xbfu\x84\xdc\xcb)]\xd8\xbf]\xdb\x94\n\xb3,\xe3\xbf\xd4!\xd1\xb7\xfeM\xef\xbf>\xbb\x89\t\x97\xda\xd1\xbf~\x14\xeeD\xfd\xe3\xc6?\xd03\x90#E\xaa\xe7\xbf~\xa4!/0{\xd6\xbfm\xa3I]k\xa3\xaf?\xc5TPY\xf4e\xe1\xbf\xeeh4\xac\xe5\x8a\xe3\xbf\x93M\xfeL\x19\xc1\xe4\xbf\xbb\x13\x87\x94\x08\xf8\xe1\xbf\xe0\xbfUu|\x01\xb7?M\x90\x98b\x86\xf6\xe3\xbfX\x0e\xe0{\x11C\xbd\xbf\xb1\xc6\xc0P+|\xbb\xbf\xff\x1b[\xa4&\r\xda\xbf\x87\xfd\xf1\xe9\xcem\xba?\x8e]\xf3\xb2\xa9Q\xd9\xbf\x93o\x97\xe0sF\xc7?\x068\xfb\xa5\x14\t\xc2\xbf7\xc1\x8a\x8ba~\xe9\xbfL\x8d\xee\x87\x00\xe0\xb1\xbf\xa6V\xe8.\xd3\xc9\xdd\xbf\xb3\xdbN2F\xb3\xe3\xbfs\xa7\xc3\x08\xbb\x05\xe1\xbf!\x1f%]\x01\xce\xcc\xbf\x7f\xaaU\x80\xae\x14\xd3\xbf\xd4{T]?#\xc9?_\x14b0i-\xd6\xbf}\xc6\x04\xc7f\x0c\xe9\xbf\x07{\xa9\xb3\xf9\x8a\xc4\xbfy\xc1\x10I\xab\xed\xb6?\xe4\x15\x12[{\x91\xd4\xbf\x80\x02\x85\xfa}c\xc3?\xa0@\xa3\xdc\xc7\x1f\xd0\xbf\x8e\x9d\xb7\xcd\xd6\t\xe1\xbf\xb7S\xa1\xa7\x88\xe8\xca\xbf\xa2\x81\xfd\xd4\xdd\xac\xc5\xbf\xc6O\xbaP\x0b2\xe5\xbf\xd8(\xe1\x94F#\xb1\xbf\x95\xf8\x8fB\x11o\xe8\xbf\xc4 \xaaYT\x85\xcc?~\xe8\xf2\xeb!j\xe5\xbf\x95x\xc9\x0f\xce\xb0\xd9\xbf\xb2Dr\x82\xf4K\xe1\xbf\x8b*~\xad\xae\xf1\xe8\xbf\x0b\xd4\x90$f\x87\xa7\xbf\xbe\xeaL\xfcy\xbe\xda\xbf6\x16\xf9\xb8\x17\x9a\xc9\xbf\x08W\xe8O\x11\x14\xe5\xbft`r\xe1\x9f?\xe5\xbf\xb6\xe3!\xb6\xc1\xf6\xd4?\xabH=\x85\x0f6\xe0\xbf\xa1+cx\x8e\x83\xd1\xbfE\xfc\xe0\xa91\x8b\xce\xbf4\xd2\xcdY\xab\x95\xd8\xbf\x85\x06H\xa3r*\xa1?D\xc4\xdd\x9e7\xb6\xdf\xbf,u\xe3Ud{\xe0\xbf\xcd\xb6\x16\xa3\xad5\xd9\xbf}\xaf\x93"`O\xa3\xbfF\xc5U*v\xf0\xb1?\xce\x8c\xa0O>\xe0\xe4\xbfs\xc5EK\xda\x0c\xe6\xbf\x16\xc1\x1b)\xfd\x0b\xe3\xbf\x1dDW\x0f\xcc\xad\xd8?!\x1ay8Y\xd3\xe3\xbf~\xfbv\x1d.\x0b\xd1\xbf\xa92<\x86\xeeB\xb4\xbfW\xb7\x04\xb4n\xc6\xd8\xbf7Qg\x10\xed\x13\xd2\xbf\xea\xfaHb\xff\xb5\xd3\xbf\xd5\xa2\xa9S\x9e{\xaf\xbf@q\xe8Q\xe2*\xd8?)-%\x02\'Y\xe5\xbfSu\xad\xde\xb6a\xd0\xbf\xca\x03\r"j\xdc\xde\xbf|M\xe0\xc9\x01\xe0\xdf\xbf\xb0h7u\x12N\xbb\xbf\x7f\xa7\x88\xcc\x06\x01\xb4?8R"Oc\x03\xb9?\xb7FCx\xb4\x19\xc8\xbfk\xaf\xb9\xb2f\xb9\xe0\xbf\x9bxij\x10\xd2\xe1\xbf\xc9\xe4\x86|\x14\x9e\xdc\xbf\xed\x91\xbd\x00\xbaD\xe5\xbf\xf1\xce\x14\xb8\x13t\xa8?\xa5\xa7d4I\xd6\xcd?S\x0b\xb8\xd6\x99C\xd6?1\x91o\xe3S%\xd2\xbf\x17\x06\x9aD%\x1c\xe7\xbf\xd28\xb9{\xcc\x93\xde\xbf\x1dl\xc5{w\xb1\xa1?^\xb7IZ\xe7\x8d\xdf\xbf\xd9\xc0r\xa2:\x83\xc3\xbf\xe4\xde\x00\xcf\x19\t\xe3\xbfaW\xe7\xcb\x0f\xbf\xe6\xbf\xdb\x96G\x0c\xb9o\xe0\xbf0\'\x95\x886V\xd6\xbf\xeb<\x00Umd\xbd\xbf\x86p\t\x8fj\xfd\xe5\xbf\nj\x08.\xa5w\xeb\xbfXeW\xaa)G\xd6?\x9dP\xa9b5^\xdc?\xfb\xf1a\xc5\x8f\xf4\xce?p\'Y\x90\'\xa7\xe0\xbf\x804xK\n\x19\xe1\xbf\xc0!\xcd\x8c\xb0\x04\xea??\x12\xa6\xa1\xe1/\xe7\xbf\x85\x99\x18\xf4\x8f\x95\xe2\xbfg\x87u\xf3\xf4_\xb0\xbf\x062+\x97G\xfc\xc1?\x9d]\x1aq|:\xc7\xbft\xf4\xf7\x04\xed\xc6\xec\xbf\xceJ\r\xfc\xb0\xaa|\xbfz+\x05\x1c\x0cV\xb2\xbf\xd9i\x01S\xaeX\xe2\xbf\xa5\xf9\x9dU5\xac\xca\xbf\xb4\x17\x8a{\x15\xc9\x98?Ht\xdaQM\x10\xd8?\xfd\xf8?X8\xc7\xc3\xbf\xf3\x90\xf3\xe3\xec\x8f\xe8\xbf\xc7u]\xc0F"\xda\xbf\']J\x12\x90\x8e\xe7\xbf*Jq\xe5\x0es\xb3\xbf\x1e\xa7A\xc7\xff\xbb\xd0\xbf&v_:p\xaa\xda\xbfd-\xbe\xc7\xd0\xbd\xdf\xbf\xd3r\x06\xe3i\x1c\xd9?\x02\x99\xbf\xc41\xbf\xe2\xbf\xa6\xe6^\x0f\x90`\xdf\xbfG\xe8\x1c\xa0Nu\xef?\xd64\xa2\xfd\xfa\xae\xe2\xbfRw\xb7\x8d\x7f>\xdb\xbf\xc0\xe0\xd0\xc8\xdd\xe3\xc5\xbf\xa4\x02\x05\x113f\x9f\xbf\x1d\x0f\xb0p\x83\xc1\xde\xbf2\x8c\x1f\x0fp\x93\xca\xbf\xea\x025\xab\xe2\x8b\x99\xbft\xc1\xb8\xb1\xee\xe3\xe0\xbf\x98\x95\xcd\xffo\x96\xe4\xbfv\xc5\x97\xd3Z\xed\x92\xbfR\xb4<\xc5d\x12\xdb\xbf\xb9\x1f\xa9\xc0\x8fT\xc1\xbfct5!j\xf7\xe3\xbf\xdb\xeb\x96rj\xb6\xe4\xbf\xceG\x8chk@\xe0\xbf%\r@\xa2\x024\xdb\xbf\xce\xf6\xd1\xecFD\xe5\xbfj\xed+u\x8bk\xc3\xbf\xa9\xa6\x04P\x8e\xa8\x8f?\xebN+Y~\x0b\xbe?Y\xe1bI\xcf#\xd1?&\xf5##:L\xc2?\xd5\xc3\xfeV=\x82\xd1\xbf?a\',\xe5\x82\xdd?37\xa2L6\r\xd5?p\x00\xe2B\x84O\xa0\xbf\x1a\x02\x92\x02\xe5\xa5\xe6\xbf$\xdfF\x7f#\x05\xc2?\xebs\x84\x0c\x9e\xff\xef?\x0c\xe1M\xf9m\xf6\xd0\xbf\xbdcX\x82]\xbb\xdb\xbfP\x85\\(2\xc9\xe6\xbf\x89\xf8\xae\xb4\xaf\xcd\xca\xbf\xed=\xb6\xd7A4\xda\xbf\x95+\x13\xa7\x82\xf6\xe4\xbf\x8fF<\xd7\xde\xcf\xd9\xbf\xde\x01\n\\\xd4\x1d\xc3?yN\x8ft\xb2<\xe3\xbfcb\xc4_S\xf4\xcb\xbf\xd8\x0b\xb3}\xcc\n\xd7\xbfT6\xed"C\xb7\xe1\xbf\xd7\x15\xa0\rs\xba\xe1\xbf\xd6E1\xe2\xb6B\xc8\xbf\xaa\xb15p?A\xda\xbf\xf77\xf9@\xc7E\xd1\xbf\xbd\x8d:\x10/\xdc\xe8\xbfWL\x15\xfaI\xb4\xdb\xbf:\xbc\x0e\\\xc5)\xe4\xbf\x98\xf3\xf1\xf59\xc4\xd4\xbfr\x02\xd4\xc2Jq\xe0\xbfSIQY\x19(\xee?\xe38\x82r\x80\x06\xe5\xbfA\x81\xfb\xb7\xfd-\xc0?\xaa\x92j\x8c\x89X\xd0\xbf\xa8!\xbe\x988\xc7\xe4\xbfo\xf3e\xda\xf2m\xdc\xbf.\xc5\xa08[\xc4\xd5\xbf\xa8\xdcB\x9d\x95\x14\xe4\xbf!\xa7y\xb8.E\xe2\xbf\xaa\xb2\xf1\xe2\xe9!\xe0\xbf\xf0\xddlj\x00e\xd7?\x03y7\x06L\x1a\xe8\xbf\x1b\x8a\xb7}\xa3p\xd0\xbf>8E\x89\x03\xbc\xbd?\xb1m\xd1\x04\xfcI\xb6?C\xd5i}KE\xc7?L\xd0,?k\x0f\xe3\xbf\x1a2\x8c\xad\xcf\xbe\xc4\xbf.B\x96f\xa6\xe9\xba\xbf\x0cw\xdfz\xe2\x99\xdb\xbf\xbbp\xa8\x05\x0b\xb9\xc9\xbf\x87tV\xffAC\xd4\xbf\x1ef\xec\x89\'}\xe2\xbf\xf3L\xfc^\x80\xf9\xe4\xbf"\xd8\xe4^\xab\xbf\xc2?\xf3E?\xaa\xc8\xb6\xea\xbf\xfa@\x89&7{\xc0\xbf}\xe4\x065\x84\xe6\xbe\xbf\xb5\x8d\x88vr\x0e\xc7\xbf\xddh\xd61\x96.\xe4\xbf\xf21\xb0\xf6UR\xc1\xbf\xed\xfc\xe1wv\xf7\xd2\xbf\xed\x1f\xd3\xb97e\xda\xbf\xdd\xe5\xea0\xd8\xddh?&) \x95C\xcb\x99?\x8fQ\xae\xe7OI\xe0\xbf\x88\xb2\x977\x90t\xd6\xbf?\x06@\xbf\xc6\xc7\xd7?\x1f\xea\xea\x16\x83\xe9\xd0\xbf<\x14(O+U\xe0\xbf\xfd]\x81\xa5\x89/\xa1?\xc2\xa1\x99\x95\xa5,\xe7\xbf3)=\x7f\x8c\x8c\xe4\xbf(\xe7\x04\xf5`A\xdc\xbf};j\xedM\xb4\xc9\xbf\xf6\xa4\x00^\xdf\x8a\xd4\xbf\xe9uJj\x7f\xc9\xd6\xbf\xa3 m!\xc93\xdf\xbf\n\xa5\x9a^\x10\xff\xe0\xbf\xa3\xd6!\n\x7fg\xe0\xbf0K\x90\x07\xb2=\xec\xbf\x1ew\x8bW\xccT\xe5\xbf/\xbc\xec\x01zl\xd8\xbf\x90\x8d\xfa\x8e`\x9b\xaa\xbf\xad\xce\xb2O^\x80\xe1\xbfWP\xfdqkM\xa8\xbfe-\x8fm\xa6\x99\xc7\xbf\xa8\xc1\x1dx\xbb\x02\xd8\xbf\xa2\xe2\xcb}\\l\xc8?\xf7\xa6\xd0m\x1b\xcc\xc3\xbfZ\xe3\x8cb/\x19\xe2\xbf\xb8aNB\xa1\xf7\xc6\xbf\x99\xe4S\xca\xaa\x8b\xe3\xbf\x9e\xf2\x13\xcd\x02%\xde\xbf\xbcV\xae\x9f\xf9\x8f\xe0\xbfq \xd6\xcf\xa3\x80\xde\xbf\x98c_\xd1\xf4\x84\x8b?\xfcOn\n\xfb\xeb\xd2\xbf8\x04\x1a2`^\xdc\xbfk)\xaf\x05\x10\xfa\xe5\xbf\x03\xa3\x0by8\xce\xe0\xbf\xbbH\x12\xd1\x87\xc4\xd9\xbf1\xd6\xa2\x9b\x9e\x94\xd3\xbf\x1b<\x18\xba+\xf7\xdb\xbf\x93L\xbaw\r\xcb\xd2\xbfE>\xe8mV\xc6\xdf\xbf\x111\x11\xb0\xf4Q\xb7?wLdD{\x14\xd3?w\xe3\xf5^\x86\xd3\xd6\xbf|\x87?\x10\x9fJ\xc2\xbf\xc3\xa4)e\xcf\xf5\xa8\xbf\'\x11=\\\xab\x18\xbb\xbf\xe8\xf3\xe7\xf37.\xc7\xbf^\xddY\xa7\x96O\xe2\xbf-\xfdn\x7f.\\\xd3\xbf \x1dh\xc2\xdf\xe9\xc4?\x88\xd0\x90l\x00>\xe0\xbf\xf5h~\xe0S\x13\xd1?\x1dX\xfbB\xf2\xa5\x9f?%\xe5\x048S[\xd9\xbf\xd7h]Y. \xd0?b\x81\x91\xda\xc0\x93\xbe\xbf\xef\x9a\x83ry\xde\xc7?\x10\x14\xff\x96C\xc7\xa8\xbf\x10t\xd7\xdd\xc4\xf8\xe7\xbf\xa0l\x1c\x13]H\x82\xbf\xbd\x1f\x9e\xb9\xc1\x8a\xe0\xbf5\x1a-\xbf\x8c{\xe6\xbf\xeeT\xdc3\xbc \xa6\xbf0\x98\xd6\xeb_T\xd1\xbf\x82\xe3\xc1\xc7\xa5dj?\xa6\xc9\x10\x81\x80\xd1\xcb?c|\x16L{p\xc9\xbf\xae\xe2\x1f\xcb\x849\xd4\xbf\xab@\x86\x04\x7f\xc9\xc5\xbf\xeemOe\x85,\xc9\xbf\xd7\x1bR\x82\xc2g\xd0\xbfd=\xbd@\xd9\xbd\xd4?\xc2\x06*nC(\xd2\xbfD\x863E\xdc;\xe2\xbf\xf9\x0b4\x11z\xa1\xbd?\x97\xaa~\xdb1\xed\x9f\xbfB\x10\xe0\x01\x86s\x83\xbf\x9d\x1a\x99\xfe\xa1\x81\x9b?r\xbe\x96\xdb\x03\x1f\xdb\xbf.-[\xfd\xfc7\x94\xbfJA\xf9\xaa\x06R\xe4\xbfH\x8c\t\x1a\x1eF\xd2\xbf\xa36\xf5\xb6\xb7\xf1\xd2\xbfgK~\x1c\x12\xde\xe4\xbf\xd0\x90\xea&\xa0l\xc3?E\xd8\x85I[\xdb\xce\xbf\xbe>\x99\xb8\x8dj\xac\xbfy\xd9\xbd^\x12.\xd9\xbf\xcf\x82\x89\x9a\xcdQ\xe7\xbf\xc3\xe2l\xc4_\xeb\xdb?\x05\xf2\x91\xc6@"\xd9\xbf\xee\xab\x82\xec\xa2\x17\xb8?FtxW\'v\xd8\xbfw8\xaa\xb5w#\xe0\xbf)\xdf\x10\'\x01\x97\xd4?\x98z0I\x18\x80\xd2\xbf(\xe4\xc0O\xd0\'\xd4\xbfm\xdc\x03\xa4:\xde\xd2\xbf\x9e\xb5\x7f\xd7\xa6\xc3\xd3?\x05*\xc2}]>\xa3\xbf\x07n\xdf\xcd\x12\xb2\xe7\xbf\xec\xf4|!\x15\xbb\xe1\xbf\xb4 \xd7l\xf9L\xdd\xbf@m\x05\x9b\x11\x1b\xd5?\xd2\x88E\x9a\xd2f\xde\xbf\xd8T\xcf\x165\x87\xa3?\x00%s\xb8\xab\n\x8e?\x11\xe7\xce\xc3\xdd/\xc8\xbf\xad\xa9\xbd\x08 \\\xc5\xbf\xf6\x83\xd4m\xabg\xba\xbf\xfc\xa6\x14\xad\x8d%\xab?\xecW\xcd+c\x03\x8e\xbf\xf3r\xfdS\xe4I\xd9\xbf\xaeR\xd7\xd8n\x05\xd5\xbf\xc3\x07pX\xc6l\xd9\xbf$\x8e\x1a\xcc\x9c\xc4\xdb\xbf\xe7\xd7S\xce\x9er\xcf\xbf\xbc\xfe,m]\xa2\xa9?\xa0\x93\xd3\x97x&\xbb\xbf\\\xcd?sf\xce\xd1\xbfB\x03?\xf3\xf2\x7f\xd2\xbf\xb0,^\x98\xe7e\xc6\xbf"\x0bm\xf3oA\x89\xbf<\xf2\xcb\xcc^s\xd6\xbf\xb1\xb1*K?\xa6\xab\xbfC\x9b;\r%ZL?.\xac\xc1\x1d@\x85\xc2?\x1e\x1c\xf6\xe2ux\xcd?g\xa5\xc7C(J\xdf\xbf\xcbz! AJ\xe1\xbf\xa4V_\xfa\x96\x8a\xbd\xbf;b=\xfe\xa7\xec\xc2\xbf\xfe+G\xc4\xce/\xd2\xbf\x1c\xa5\xf6`\x8d\xf5\xda\xbf\x8b\xb8\x92\xa2\x96\x8f\xe6\xbf\xefG\xdc\x9f:\xc2\xe1\xbf\xdej\xfa\x90w\x98\xb3?\xe2X\xbc\xefS\x8d\x89?\xb2\x02\xfa\xdb\t)\xdf\xbf\xf7\x04I9V\x9b\xd8\xbf\xb9\x08\xd8<%h\xdb?\xc76K\xf4Y\x91\x8a?Y\xf5l\xb8&\x1b\xa3?\x874\tV\x17\xcb\xc0\xbf\x15\x11\x86\r\xdf\xbd\xd6\xbfAPV*\x12\x1c\xdd?//\xd6\xcb3\x1c\xdc\xbf\xc0:4\x94\xe95\xd7\xbf6\x063}\x8c\xb9\xd3\xbf\xd9\x000\xf8aC\xcc?\xf8o\x1b\xb7\xd6W\xc7?\xd2I%\xd1b\xf6\xe5\xbf\x7fS\xa78\x19c\xc9\xbf\xb3K\xd4`\xdf=\xb7?\xf0\xef\xff3\xb0{\xe6\xbfrl\x0bhl\xc5\xc5\xbfNBe|\x1a7\xc8?\xb5\x17M\xd8\xc9)\xb4\xbf\xd8jv\r\x16$\xd3\xbf\xeb\r\x1a"~\xe1\xda\xbfj)\x87\x9d>&\xc9\xbf\x9b\xdb\t\xbd\xc8w\xe3\xbfIH.\xfd}{\xbf\xbfp\x05\xfcd\xf9\x8b\xda\xbf+K\xd5\x14\x15\x8e\xa1\xbf\xcc\xbe(\xa5I\x9d\xa0?3\xed\x82)!j\xad\xbf\x02a\x18\xc6\xe9w\xd2\xbf\xddLe\xbcIY\xe2\xbfI\xa7\x01\xb8Mg\xe7?\x81U\xfa>\x98\xd5\xdd\xbf\xeai\xd7\xc4\xd6y\xcd\xbf\xb4u\xa9\xf7G\xa3\xcd\xbf @l\xac\xf9a\xbc?\xa1\xa1g\xe3\xc4\x98\xd6\xbf\x07K\x91\x13E\x8f\xbc\xbf\xf7f\xaf_t\x8a\xbf?\x7f#\x8e<\xdf\xb7\xb1\xbf\xdd\x8c\x80A<\x04\xe2\xbf\x92$\xef;[+\xd1?SF/\xa8\xd3]\xd3\xbf\x80\xfb\x86\xbd\x16d\xcd\xbf\x106Q\xbf\xdcO\xe4\xbf\xb15\xdd\xce?\x05\xdd\xbfk\xf0\xb5\xbf\xdeA\xdb\xbf\\\xdb\xd6F\x05t\xe2\xbf\xfbL\xc2A\xd3\x07\xd4\xbfw\xfc\xd8Ro_\xd0?\x06v\xce\xd0\xba\x06P\xbf<`CH\x864\xc9?\xf1\xc7<,\xcb\x9e\xc6?\x0fJ\xfa\xb76,\x9c\xbf\xa3U\xba5\x8e\xb1\x8c?\xbe7\x91V\x8f\xee\xd9?\x16\xe9\x9aH`}\xe0?\x1aaU\x92\xb2\t\xd2?>Ku\x15\xf0v\xde\xbfs\xb3b\xa1t\xc1\xd4?c\x93\x16\xcc@\xd9\xe6?\x88\x12U\t\xf7:\xdd\xbf\xdb\x19]+w{\xb5\xbfq\xa6\x1eu\x1e\xaa\xe5\xbf\xcf\x01D\x89\xe8\x81\xd3\xbf2\x0b\x85\x80\xff\xd4\xd8\xbf\x0c\x0c\xbc\x8e\xa9\x19\xe4\xbf\xd9\x95\x18\x01\xd54\xba\xbf\x93%\xed_r\x9e\xca?]9\xe2\xd6<y\xe5\xbflP\xb0\xa0\xffG\x9d\xbf\xe9\x94\x1bg\x0b\xc6\xb0\xbf\xcec\xdf\xbc\x80\x00\xe1\xbf\x988\xd6\xb4\x84\x0e\xd5\xbf\xfcP]\xc9L\xdb\xbc?\x12\xfe\xe3\xaa\x9a\xd3\xdc\xbf\x9a\xee\x17\x08O\x8c\xcf\xbf\xc8\xc3\x9e}+\xe9\xe2\xbf\xf7ZP\x03\xc3\xc1\xb9\xbf$\x140&\xee9\xe3\xbf\xc6]\xb8\x01\xde?\xd2\xbf\x07\xa9ad\xe8\xe7\xd2\xbf\x87\x14t>\x89\xf3\xe0?\x13\xd3xd\xb3d\xdf\xbf\xe5v\xf4\x84\xb6\x13\xa5\xbf\x1b\x85)Jz\x9d\xb5\xbf\xe3\x7fh\xa9\x14X\xd4\xbft\x95_\x01\xa5\x02\xdf\xbf\xa2f\xcb\xee\xbb\xa0\x93?\xd2nU\x81aq\xd6\xbf3\xd5\xa2\x1b-?\xdc\xbf\xfbZ.\xc6\xd8\x18\xa1\xbf+\x96\xf7\xf8S \x85\xbf\xa4\x9cH\x04\xbe2\xd5\xbf\xf3.\x8a\x8b\x9c\xd7\xd3\xbf\x8co\x82\xa2\xb2\xb9\xbe?\x9c H\xc5\xc7Y\xd6?S\xd5u%\xe0\xbf\xcc?y6C \xe9\x0f\xd8\xbf\x11N\xdb\xd8I\xcb\xca?\xea=L\xc8\xed!\xdc\xbf\xa2:\x80\x87\xb3\xa2\xd3\xbfz\xb5|%;l\xc4?\x9aX\xbfQ\xd8{\x8a?7\xf7,J\x9bs\xd8\xbf|f\x9bu\x07\xa7\xe3\xbf\xa9\x90\x18\x9d\xb3\xa9l\xbf\xc5\x92_\x8d\x92.\xe3\xbf\x0f\x17\xf4\xd8\xea;\x96?!w\xc7\xb1j\x11\xc3\xbf\t\xa4\xe9?5n\xca\xbf\x08\xb4:\xba[\x85\xde\xbf\xec\xef\xf3j2\x18\xcc\xbf\x95gN\xfc\x93\xf8\xc0\xbf\x08\xec\x97r\xe6p\xd3\xbf\x87|\xc3\xd4\x1d\x9b\xb3\xbf\x02\xe3r\xadl\xb1\xd9? \xe9\x0e\xf5\x1ec\xcb\xbfKT\x18\x1d\xde\xb5\x9e\xbf\xee\xddb.\x1e\x1f\xac?\xd4.$\xd4+\x87\x84\xbf\xfe@\x0e0\xd3\x05\xd6\xbf\xf4\x10\xcfi\xf3\x9c\xc3?Kz-\x99:\xb9\xe3\xbfl\x1d\'\xb9\xff\x14\xe7\xbf^\xdb\xde \xfb\xed\xc2\xbf\xbb\x06J\xaa]\xaf\xc7\xbfF\xe0w\x8f\xf1Fp\xbf\x16\xc8L\xca\xb7^\xc8\xbf;\xa2\xd7\x993\x8c\xde\xbf}A\xa5K\t\x8f\xd8\xbf[;\x96\xff\xee\x10\xd2\xbf\xa5\x7f\x94\xc6\xabh\xe5\xbf4\x17z\x18\xb2\x1f\xe4\xbf94\xd0\x9a\x8e\xf9\xd9\xbfF\xed\xe7A\x8b\xde\xb0\xbf\xac\xfa\xa0Z\x1d\xff\xc3\xbf\xcf\xaa\xb4\x9f\x12\xe1\xc6\xbf\x94:4\x8fF\x1d\xae??<\xe9\xee\x1f\xe5\xa9\xbf\x9fD5\x97zO\xb3\xbf\xfe\xab\xcfZ\x93\xa0\xa1\xbf\x98h\x7f\x95\xb7\xcc\xde\xbf\xa0H\xf1\x13z\'\xcb\xbfh\xed\xddS\x01\x8c\xe1\xbf\xc9\xb6}\x8e<\x8b\xcf\xbfgg\x02\x8c\xb3r\xce\xbfm{\x07\xa7j\xcb\xd0\xbf\xa8\x04\x982\xb6\xa3\xc6?f\x19\x7f\xadv\xea\xb5\xbf\xfdO\x11\xe9s)\xda\xbf2\x19\xad\xf1\x90\xbc\xd5\xbf\xac\xcd\x82\xb8\xed\x87\xd2\xbf\xf5\x15\x1c \xeb\x11\xcd\xbf,\x9b\xeeo\nX\xb0?\xb6\x9c\xf2\t\xbb\xee\xc3\xbf\xb3\xb8\xd2\x97\xeb\xc9\xd2?\x9b\x9dp\x93:4\xe6\xbf\xd7B\xf00I\x15\xcd?\xe4\xb7\xd5i\x14S\xe2?\x9b\x7fYApL\xe1\xbf\xc4\x9b1\xbe\x9f\xcc{\xbf\x84\xc4A\xd0L\x16\xe9?!\xf7*\xa3\xf1\x0e\xd8\xbft2\xa7\xcf|\xe3\xd2\xbf\x9e\x89\x8d\xec\xdfe\xcf\xbfV\xf0.l\x92\'\xad?\xe0\xcc\xea\xdf\x9f\x06\xe0?w+\xf1G\x8d\x1d\xc4\xbft\x7fpn`f\xda?8Rk}\x13\x8f\xb6\xbf\x94\xe6\x7f\\f{\xc0?\xe0\xdd\x96p\xe9\xe5\xee?\x9cE\xe7(\x06\x11\xdd?Uq\xef\xc9?\x1f\xe8?\x84S\xdbo}\x18\xe1?\x8d\xd1/\xa0\xddc\xdb\xbf\x82Sy\xa7\xe7U\xe2?/\xe0\x8b\xefM)\xbd\xbf|\xffR\x1e\x1a%\xdc\xbf\xa7\x02\xe2\xbd\x89\x01\xc7?U\xc7\xcdq\xdc\xc7\xea?Bl\x1a\xc1\xfe\xb1\x9c\xbf\x8c\xbe\xcf\x11\xbdR\xd3?.I\xc5Kw0\xd2?\xf2\xf3\xae\xb5\xc1!\x87\xbf\xa6\xf3\n-\x867\xda?\xd2\xb9\xae\x0e\xf7\x8d\xdc? \xc5\xe9(\xca\xa8\xd7?\xf6p\xc9\x83\xbf\xb1\xda?\xb2\xbfG\xbc\xd8\xa5\xd0\xbf\x1b9d:j\xb6\xc4?\xfb\x84\xb1\x89\xa2D\xc9?Z\x14\x1c\r\r>\xd8?\xd5\xcc\x07\xebP\x1a\xe0?\xb5\xb4!u\x93\x99\x99?\x8e\xb0\xd8\x95(\xe4\xe7\xbf\xbb\xac\x0c\xce%7\xe2?bX\x0b\x85V\xb0\xdd\xbf\xdc&_\t\x9f\xfd\xdb?~K|\x9eC^\xa1?#\xea\t\xbe&U\xe0\xbfH\xa6\xefqB+\xd8?\x0c\x91\xe8\x85\x17@\xd5\xbf\xe3sS\x17s\x0f\xd8?\xe3\x92;\xa5s\t\xb5\xbf\xca\xda\xbe\xe9Dj\xd1\xbf\xc0\xd5\xbf=\xba\x19\xe9?\x14G\xb62*O\xcd?\xc2\x8f>\xb6B\xcf\xb6?\xd2gFiL#\xe5?\x11\x84\x08\xd8\x7f\xd5\xe0\xbf\xb8;\x9cHL\xea\xd3?m\x839\xbd\xec?\xc1?\x8b"\xb4u{a\xc2?\x0f\x1dH\xfaz\xa9\xda\xbf\xbe\x0e~\xe2\xc0\x0e\xd8?D\x10b\xc4\xd2\x7f\xc0?\x8dy\xa5\xb8\xae\x04\xdd\xbf\xe1\xca\xb1\xbe8L\xe1\xbf\xeb\xbb<\xc7\x92\x8f\xbe?Hv\x1f\xe6\x1f\xe7\xea?\x12\xb9s\x80\x99\x0e\xd3\xbf\xf31T\x1am\xa1\xba?#\xc0+de\x9f\xe6?@\xa7\xaf\x9fz\x97\xc2?\xe4\xfe7\xa1i\x0c\xd9?X\xbc\x1f\x0eP\xd8\xd5?$\xee\x9c\xcc\xde\xe5\xd3?!*\x1a2\xcc\xc1\xe0?^\xac\xe1&1\xf6\xd4\xbf\x94\xa9\xd5Y~\xe5\xa3?\x86.\x84z,\x8f\xdb\xbf\xd9\xaf\xediN\r\xcb\xbfZ\xc5M`\xc0\x07\xe2?\xd0\xaf\xe8\x91>\x9c\xe8?\x1c~\xee\xd6\x91\x96\xe4?T\xaah\x7fw\xa9\xcb?\xf2p\xe2Y~7\xb9\xbfj\xd1\xac\x16\x99\xb2\xc2\xbf/\xe4\xd3\x9fP\xfc\xd0\xbf\xed\x04\xc9^!V\xc5\xbf\xea\x95\xf3\xcc\xaf\xa5\xe7?f\xfb\x00L\xde9\xe1?,_\xb2\xfd;\xd6\xcf?3\x92\x0e\x9dFb\xd5?@\xd8\x1fx\xc1\x98\xe2\xbf]/w\xa5\xbd;\xc7\xbf\x87)\xe4;A>\xb6\xbf,\xfc\x10\x13J\xac\xc1?\xf9,\xff\x8a\xd8\x1e\xdd?\xc3\x86F=\xde\xdc\x8e\xbf\x8b\xc2\x93\xe4\xc7\xab\xac\xbf[\x05W\xe2\xe1\xeb\xba\xbfry0\xef\x8cy\xbc\xbf%K}\xa0\x00\xd7\xd0?\xf0\x97?\x02zy\x9c\xbf7\x1b,\xa8\x95U\xe5\xbf8x"\x04\xa2\x84\xe1?"\xaaf\xbc\x0f\xe0\xe6?^U\xf9\x08\xfaU\xe5?\xdbZY\xcak\xd8\xd0?\xd3:?L\x87\xd4\xb7\xbfj T["D\xe9?\xa8\x980\xc9\x9e\x87\xdf\xbf.1v79&\xb0?\xe7\xa7x\xf1\xcbt\xe1?\xd5\x9a\x9f{\xd6M\xeb?N\xe7\x18 \xa7\xbf\xd3?\xda\xa4\x86P\xf2\xbd\xd4\xbf\'I^a\x81\xdb\xdf?\x87\xe1/C@\x15\xb9\xbf\xdb\xb0\x7f\x94\xab\xd1\xc7\xbf\xb4\x95\xad\xf5\xec\x8b\xda?\xec6\x8c\xbb\xe9\x99\xde?\x1a\xec\xeds7\xe2\xe2?\xd3\nd\xe8p\xd9\xbc?Kj\xf7\n\xb5L\xdf\xbf\x87\x03\x19\xceU\xba\xc0?L\xfd\x14\x0c\x14\x88\xda\xbf\x03\x0bj\xc3ei\xce?\xd0\xe5\xcd\x11\xf6\x01\xd0?\xa2\xfcU\x8a\x01b\xd5\xbf\x01\xfd\xf4\xa1\xb5\x02\xcc\xbfV&ukR\x99\xe5?\xd4\x11\xcf\xf3Z\xb4\xd0\xbf\xe0\xb5\xb94\xf9\xdd\xd0\xbf\x96\xc6\x1a\xe9\x931\xf8?k\x81\xedG\xd4\xf1\xc4\xbf\xd4\x9b\xc8\x933\xdd\xd6\xbf\x7fm\xba\xb9\'\x84\xe3?_\xd1}\xdd\x84\xd0\xce?\xfdkp\x10\x19\x8d\xbd?V\xf3\x89g\xaf\xac\xd2?f\x1d\xcaR\xa4N\xd9?R@\x0b\x8b\x0f2\xba\xbf\xd5 \rYJ\xdb\x91\xbf~\xb0t\x08\x04\x11\xcb?2c\xfe)>\xd8\xbf?\xd9\tv\x9eT\xfe\xd8?\xb0\xb1\xb6^\xd8+\xd0\xbf|3\xb5\xcc\xc7\xb9\xde\xbf9]>EF3\xca?~AO\xacb\xe9\xc3\xbfM\x1e\x9d\x00\x8f\xaa\xd7\xbfz\xfcf\xda\xd1J\xdf?9\xceM\xe6\x07\xbf\xe6?\x951#\xe3\xa1+\xea?\xc8t\x17\x8d\xc4\x81\xee?\xdf1\x9c\xb3\x98\x82\xd9?\xd6\x0e\x87\xb6\x81\xe7\xdd?\xa2\xe8\xad\xa0\xffy\xf4?\x8c\xe4<\xd31-\xe7?-\xcbWvZ"\xe2?\xac\xf9\x90\xe2\xf22\xbb?\xa4%\x92\x19\xd9\xbf\xd8?0d\xec\xad\x90\xb5\xf5?R\xa4\xa3\xe1&\x81\xda?OIQ\x87\xb4l\xb0? \x0e\xce=\xfd\x81\xcd\xbf\x9d\xb9\x01\xf3=\x13\xc1?\xdf0\xee\x89p\x99\xc4?\x95\x05yP\xc5\x1a\xe0\xbf$\x1ex\xaa}\xe4\xc7?\x1b\xf5H\x08\xe5<\xdf?M\xbd\xda#\x9b\xca\xe0\xbfU\x1f\x1e4n_\xdc?\x19\xbf\x9c3\x88\xf0\x98\xbf\x8a\x98-n\xb5!\xde\xbf\xde\\\xed\xeay\xa1\xac?\'\xd3e\xe5\xd5\x83\x81?\xf6C\xf7fI{\xcd?\x8a\xd7x=\xc9g\xca\xbf%\xa6R\xe4\xec\xe5\xd5\xbf3#\xc6G\xe0\xea\xe1\xbf\x8e\xb7\xe0GN\xd6\xd5\xbfL6-\xb1\xd0\x86\xd8?\xdd\xe6D-u\x8e\xd5\xbf\xa6\xba\x87%Y\xa7\xeb?\x1e\xb3sg\x1d\xd8\xc0\xbf\x89\xeeTz\x1fD\xe8?\xf1<\xdb]\xcca\xbd? \xe2\xde\xd9W<\xd2\xbf\x8f\xc7\x8d3\xa1\xb3\xc3?\x98\xd8C\xbb\xb8\xa1\xdd?\xa9\r\xa5\x81\xc4\x1f\x86?z\xc7+@\x99\x8b\xd0\xbf\xe6\x96\xf9\xc6\x96\xcd\xc3\xbfR\x9b\x7fN\xc6{\xd6?\xb3*\x8b}\x18\x0e\x9f?\xdc]\xd1\x07\xc1\xfb\xd2?:\xcb\x1fl\x80\xea\xe8?\x8d\xb0}|\xe2\xb6\xcc?W\x0c\r\'\xc59\xda?Z\xa7/\xb9\xb5N\xcf?%Z\'i\x15\x84\xa0\xbfCv\\D{*\xb9?<\x85S\x9b\x03\xbe\xaf\xbfs_\xcdE\n\xa4\xd1?\x82\xa4pj\xc5\x82\xc5\xbfE\x8d\x8ejUx\xb1?\xd5\xca\xd4\x9f\xfc\t\xd1\xbf\x14\xc3\xd0w\xde\x92\xc3?_\x9d\x18\x88\x80\xd0\xd0\xbf!\xcakP=\xd4\xe0?C\xed\x96\xd1)\xa5\xc8?\xc7\x94\xe4\xa7\xee)\xd5?\x01\xd4.\xe0\xc1r\xe6\xbf\x91\x8c\x08\x8c\xaa\t\xcc?>\xde}8[\xc3\xd7?\xf3\xcf\xdc\xa5\xd9\x05\x80?I\x98v-\xd9\xb1\xe4?\x7f\x05\x8eG\xe3\xf2\xae?\x97\xa4\xc4\xed\x8f\xa3\xd4?\xb7\x8a\xcdP\xf3\xa8\x81?\x91\x99\xbd\xcb\x8ax\xeb?\xed\x12\xdb\xbb\xc4\x8f\xc6\xbf\x84\xcc\xe8\xdd\xc5\xf2\x90\xbf\x1ez\x84\x18)\x1b\xde?]\xd7&\x1b\xba\xee\xdd\xbf%\x0e\x9e \xc7\x98\xd1\xbf<\xba\xe1\x8b\x94\xfdy\xbf\xf3\xc2\xac\xebzV\x9f?\x7f\xf5\xed\xee\x17+\xc5?\x97\xe3P \xe1\xe7\xd4?MA\xeb$4\xcc\xb1?O4 \xc7\x12\x80\xb1?\xc4P\x80W\x85\x1e\xe1\xbf\xa7\xd6\xec%\xb3\x03\xe4\xbf[\x1c\xf00{W\xd1\xbf\x93\x8a9\xa7\xfc\xef\xae?\x0f#6\xb9|B\xe0?\x9a\xad\x87SUG\xd1\xbf\xa6\xac\xaf\xb76\x17\x9c?\xee\xfdMvAY\xbd?v\xc8\x16\xc1\xa5h\x82\xbffBS\xe0:\xd4\xe2?\xae\xad\xc3\x06|\xda\xdc?vL\xa9I-n\xbe?\x110\xb7\x19\xaa/\xd0? \xad\x84\xd2\xa4\x9e\xe7\xbfJ\xadF\xb8\xa5\x0b\xd9?"\xf7\xb5\x93\'y\xd5?\xf8>k\'4v\xdf?[\x90-\x98J@\xd8?!Q\x12\xbdD\xf9\xdd?\x12\xac\xe1q\x80\xe0\xba?\xc0\xe8}\xe5\x93Q\xaf\xbf#\x166@\xa6\'\xc5\xbf\xf2\xc1\x84\xf3\xdbC\xc4?\xc0\xf3\xe7eWN\xde\xbf\xfb\x9b!\x1a\xe6\xfb\xe8?H\xc0\x1b\x08\x85\x1a\xc5\xbf\x03K\xb1L\xa1\xc5\xbd?\xae\xaa\xccba\x83\xdb\xbf\x9c\\\xe3\xa6x\n\xbb\xbf\x84\xdbh\x1b\xfc\x0c\xbd?\xd3W<df\xb6\xc6\xbf-\x9e\x9f\xe0\xa7\xc1\xbe?7[v\xee\t\xa9\xda\xbf\xd3\x8f\x82?\xa4v\xdf\xbfb+\xf9\xe8\xf4\xc8\xb2\xbf\xbe(>\x08\xc7\xc8\xde\xbf\xf2q\xba[\x9c\x90\x98?\x80\x13\x02\xe7\x9c0\xd2?\x96\xdbK1-\x9f\xcf?\x1ak\xd0~\x17\xb0\xd0?\x16:\xb0\xa7\x9e\xa6\xc3\xbf\x904k\x82+|\xe2\xbf^i1\xee\x8a\xe0\xd7\xbf\x88D?\xbd\x11\x8e\xd4\xbf\xadb\x9a\x9cF\xce\xe6\xbfe\xfd\xf9\x05\x97\xbf\xa6?]s\x15\x0f\xd8}\xb2?T\xfb\xd2\xda\x08\xba\xe9?\x0e\xb0\xbd\x11\xfaT\xc4?\x04\xf2\x0e\x97Y\x19\xd4\xbf\xbc\xbdrs\x82\x98\xd5\xbf\x92T\xd8e>\xe2\xd4\xbf\xf5\xbfN=>\x1e\xca\xbfXu<S\x8b\x05\xc3\xbf\xda\xf0H\xb3Gp\xe1\xbf\x9a\x07\xee\x1cuL\xd0\xbf\xe0\x837F\x9e\x18\xd7\xbf\xbdj\x8d\x01o\xd9\xdb\xbf\x9c\xda\x98\x8ep\x8f\xb1\xbf\x95\xe4LO\x89\x84\x9c\xbf\xb0\xce\x02u\xed\xfa\xc4?\xd3\tz~)V\xde\xbf\x8b;C\x10\xfc\xb2\x98?\xc7p\xb5\xd4\x95\x9c\xd1\xbf\xef\xe1\x04t\x08?\xd5?x$\\\x9d\x93\x99\xd1\xbf\xbc\x9fV:\x9e\x01\xe2\xbf~\xb1\x17\xe3\xf6\x82\xd6?^\x1b\x87\xc7\xd1d\xe5\xbf3\x7f\x07\x16\x15m\xac\xbf\'\x8e\xbe9\xb7\x99\xaf\xbf7*c\rY\xfe\xc1\xbf\xbdf,\xb5\x06[\xdc\xbfG6\x8eV\x0e\xa3\xd2\xbf`\xf9Wq\xf1\xd6\xda\xbf\'\t\x91\xefQ\xc9\xe1?a\x16A\xc3%%\xe2\xbf\x97\xedu\xea\xa8P\xd0\xbf\xab\xe8+\xc9p\xde\xdf\xbf\xa4xY|&\xa7\xda\xbfF\xdc\x0c\xb4\xca\xaf\xe5?D\xe1^ \x94\xa1\xcd\xbf\xc9\xca[\xfd3J\xe2\xbfv\x0blL"H\xd9\xbf\x86P\xaf\xf2\xda\x01\xd8?\xca\x83\xb1\xbd\x1a\xec\xe7\xbf\x17/\xf5\x8b\x8eu\xc9?\x00\xbe\xaa\x0c\x03h\xa1?\x12\xf4\xa8"O\x95\xd5?\x9e\x05q\x84,\xb3\xc4\xbf\'\nW\nH\x1a\xdb\xbf\x85\x9b\xac\x96\xa6\xe3\xe9?\x0e\xc0\xf7\xf0\xe4{\xe3\xbf\xc1\x8d\x19C\x17Q\xda\xbfa\xcb\'2\xfb\xf2\xd2\xbfTQKF\xd0@\x96?\\`D\xa7\xe4]\xdf\xbf\xcc+\'\x927\xe8\xe3?S1\xeb\xc2cZ\xd7?$\xear\x03\xa7\x1a\xe5? \x01\x1f:p\xa3\xbe\xbf\xcc/f\x96\xa4\xfe\xd8?f\x84\\\x07\xd7M\xd8?1^\x99\xef}\xc2\xc1?\xf5\xd3\x16\x82X\'\xe2\xbf\xdf\x02\xc3eK\x1f\xe0?Z\xaa7\xe2\xa63\xe7?\xd2]Z\xef@Q\xbd\xbf\xc7\x03\x1aa\x08U\xe1\xbf\r4\xb5?\xbb=\xd8\xbf\xd3\x12\xe7.\x99v\xb7\xbf\t\x8e\x9a\xfa\xe5\xe0\xda?\x8a\'\x90\xeeU\xdc\xe0?,\x12\x1c\xbf\xde\xbc\xd5?\x1f\x04\xec\x8a\xc5\xb1\xb1\xbf\x13)\x1c\xb7\x8c\xd1\xc4?/m\x03o\x13h\xd4?\x95\t\xacyD\xd7\xdd?\xb7BM\xae]\xf9\xc4\xbf\x07\xd7\x88\x8f\xd2\xa2\xc7\xbfIZ)\xc1\x91\x01\xd2\xbf\x17\x9b\x8e\xc9\xb3`\xb2\xbf\xf4[\xc7(Rg\xe6?g\xa2V\xda"\xd5\xdf\xbf\x0e\x95\xfa%\xd3i\xe0\xbf"\x97\xc3\x93.\xd7\xc2?\xa3#eG\x89\r\xc1\xbf\xdd\xc0\x11\x9dqH\xd5\xbf\xb1.\xd1K\xdc\xe1w\xbf\xa5\xde\xe48+\\\xe3?*f\xac\xbeq\x0b\xd1\xbf\xaaH\xb8e\xe5\x19\xd6\xbf\x19\xea\x15A\x96\xa8\xe0?`\xa6\xd6\xf4q\x18\xd7\xbf^Zs\xfb\x16\x82\xd6\xbf)x\xf9\xf6\xde\xa5\xcb\xbf\xe6\xee\xc4u b\xbf\xbf\x81\x90\x9fyq\xd1\xe8\xbfK\xd0^>3\x88\x9e?\x17\xee\x15RO\xc0\xe4?\xb7\xf7\x87\xe0\xbb`\xe2\xbf\xe3h\xf4V\x94\x98\xca?\x8fz\xbb\xaa\xf8)\xe0\xbf\x14E<i\xf2\xe3\xdd\xbf\xaek\xe2\xd9\xcb\x91~?\x90\x9fK\xcf\x92\xd5\xe3?\xee\xfa\xc6\x8f$\x8a\xba?\xfebe\xbe\\\xa0\xda\xbf\xf3\x03W\x7f\x1e\x0c\xc6?\xec\xc0\xff\x1e\x8b\x15\xc3\xbf@u\x19\xe1P\xc3\xd4\xbfE\x84\xedL\x93(\xc0\xbf9L\xc8[*C\xaa\xbf\xbe\xa9E\x98l\r\xc8\xbf\xe5\xcf\xdf\xa2\x0f\x93\xe0\xbf\x08\xd90J\xf7T\xb3?8[\xbc\xa3\x19\xab\xda\xbf\xa0r\xa3:\x95\x12\xe3?<\xce\xfdY\xb4\xae\xd9\xbf\rK\xa9\xf4\xc5\x0b\xb5?\xc4\x90\xb3,\x8a\x19\x95?6\xf7\xa7\x0b\xb5\xcc\xca\xbf\x10r\x1c\x98\x05\xd0\xc2?Qp\x00\xae\xbcb\xdf\xbf\x94\xa4\xbae\xb5D\xd0\xbf;x\xbc\xff\x87q\xc6\xbf2\xac\x94l3\xf1\xe0\xbf\xa2\x1f=5\xd4\xc2\xdb\xbf\xb8s{^\x03p\xba\xbf\xa9MPKd1\xc0\xbf\r\xde"e\xa6\xf3\xd5?\x0f\xb0p\x0b6\xc6\xc4\xbf\\\xbc\x80\x18\x88\xb1\xe2?\x85I\x11\xb1\x90\x1f\xa4?\xbc\x7f\x0e.o\xd2y\xbfmN\xca\x19\x86\x14\xc5\xbf!W\x88\x90\n\x19\xbe\xbfN\x8f\x9d\x83\xd2v\xc3?\xb0\x1c\x9cb\xa3\x97\xcc\xbfw\xb9\x86\xb4\xee\x04\xd9\xbf1\xd3\xa3\x0c\xf6h\xdf\xbf\x8a\xbc\xc8\xa8\xda\xfe\xc9\xbfu\x10p*\x8d\x03\xdf\xbfB\x95\xff\xedBl\x9b\xbf\x1a\x189\xc4s\xbb\xb6\xbf\x14e/Dq\x1c\xc4\xbfR>m\xc1\x11\x82\xa1?N\xee\xa2\xd8{%\xe3\xbfQ\xe1cC\xf4P\xe8?\xfa\xd7\x92L\xa8c\xc0\xbfU\xde\xbe6\xa5\x8c\xa7?\x8d=\x92\xa5\x9b\x13\xb9?\xc7\x19N\xe9\xcf\xc2\xcc\xbf\x83\xb6q\x82\xcf\xd7\xca\xbf\x94\'\xa7\xb5&\x92\xca\xbf\xd5\xa0\x824\x9e\x04\xc3\xbf\xe2\x0b\xc9\xd6(\xdd\xe5\xbf\xc5\x93\x97\xa68F\xe2?\xb3M\xdd\xeb\xc4K\xd9\xbfh/\xdeo\x88\x15\xe5\xbf6v\xbd7\xddf\xb0\xbf\xc1OmxEH\xd1\xbf\xa7Ag\x86l\t\xb0\xbfY\xcfr\x1e\xed\x08\xde?j~\x15\xfa\xfe\x88\xb0?\x9c*\xa9\x06\xd9r\xbb?\x1e\xc2\x81G\xbb-\xc0\xbf\x87\xe0\x1f\x03\xe5\x19\xdf?X\xa3_\xed\xdf\x80\xb4?\'\xc9\x10\x82f7\xc2?\xbe\x9d\xb8\xde\xcbA\xd3\xbfo\xfdhL2j\xd7\xbf\x1b\xd4\xecE\x0eE\xb0\xbfm\xe3N;\x8fN\xd3\xbf0\xb2\xda\xdf\'2\xb7\xbf\x10\r\r\x1e\xbah\xd8\xbf\xa8\xc1\x89>\x98\xb9\xc9\xbf\xe5\x9cK\xa3\xc7T\xe8?1\xd10\xf2\xef\x8d\xdf\xbfq\x13\xd7\x1c\x1f[\xd0?\xcd\x8c\xa0\xb5\x83\x85\xdd\xbf\xe6J\xba\xff\xf6\xc9\xe1\xbfn1\xdc;O\x8e\xe5\xbf\x01\xf2\xe5xz\x84\xca\xbf\xb6d\xf9\xc08\x95\xd5\xbfU\x87X\xbf\xd8S\xc1?\x87\xd3g\x12\xf3\xdd\xdb\xbf"_Q\xf5\x0e\x97\xe7\xbfXB\xdd&z@\xcf?A]\x8a\xd3/\xb1\xc1\xbf\x0f\xe0\xdd\x96\x96\x92\xc8?\'\x0b\xb2\xa4\x0f\x91\xc0?"\x84km\x0b\xb3\xad\xbf\xb9\x0f<V\x8e\xb0\xc6\xbf\x04;\xbb\x89s\x89\xdf\xbf\x03k3z6^\xe2\xbf\'C\xe7-\xc59\xb7?\x93\xab\x8f9\xe6\xdb\xe0\xbf6\xb9{ \x7f\xe8\xca\xbf\xd5"{Y\xbcz\xe1?<\xb3\xccC,\x8f\xc7?z\xc9\xe3\x9d\x1f\x1c\xcb?\xa7D\xaaz\x82l\xd4\xbf\xe4\xb3\xd0\xd1Az\xda\xbf2\xca\x12\xe8C\xfd\xc8?^\xba\xbd\xaef}\xdf\xbf\x93\xa8QS\x83\xeb\xcc\xbf\xde\x0f/\xceL\xdf\xde\xbf\x13\xd1\x0e}\xa5:\xdb?K\x05\x0e\xac\xdbm\xda?\x9d7j?\xbf\x9a\xdf\xbf\xdc\x88\x8b\xdb\xe8\x96\xe0\xbf"\xd6h\xf7=P\xdb\xbf5\xb3\x0cJ\xf2\xea\xb0\xbf\xb0\xa6\x17?n4\xaa\xbf\xb6\x18\xa8*\x83p\xc0\xbf\xaaxQ\x1a\x8b\'\xdf?u\x82\xf765;\xd3?\x8d\xa1\xc6\r\xf89\xbf?\xbd,\x1d\xf9i\xd8\xd5\xbfL\xc0\xa6L\xbe\xf8\xc9?\xfc\xd2\xc9\t5W\xc5?\xa9\x80\xb7,h\xe7\xe3?c\xb0\x9dZ\x1d\x12\xc2\xbf-\x04\xa8So\xa6\xe0\xbf\x9b\xde\x86\x96:\xd7\x9e?x\xf6\xc4\xedw*\xd8\xbf\xcc\x06\x90\x82\xca\xc3\xb9\xbf(4\x95>\x0c\xfb\xb5\xbfn\xaa\xca\xd0\xf8\xdb\xb2\xbf\xc9\x99X\x7f\xa9H\xcb\xbf\xf0Rd\xceAa\xda\xbfS\xfe/\x1e\x0b\xc1\xa6\xbf\xee\xa3\xd7%\x90\xac\xdb\xbf\xe9\x82\x01\xcf\x1f\xc4\xd6\xbf\xde\xa8\x97\x1e\xeem\xb7\xbf\x9b\xf7\x16\xb9\xae+\xc5\xbf\xcf1\x08\xd0\x0cf\xbb?\xb8\xb8\xd6\xba\x1f\xc5\xba\xbf\xb9WP\xa4P<\xcd?\xd2\\\xb9\xc3S6\xd7\xbfmw@1?=\xe0?\xba\x9b\xac\x0b\x8d^\xe7?\xcc\xbd\xeb\xb9\x0b\xd1\xe0?-\x91\xddD,\xe2\x80?\xd6\xfbf\xad|\x1c\xe9?!\x04R\x10<r\xd0?\x02\xe7\x0eVY\x88\xe2\xbf\xe3^\x03\xd1[\xbe\xf3?\xa6\xc9\xf8\x03fj\xd2?\xe6i\x1a\x96\xa9v\xec?z\xde\xcc;\xf0\x1a\xe2?u;\xe7\x92\x888\xb1?\xca\xb4\xc65\x1d\x14\xe3?\xed\x85\xe76\xacG\xe3\xbf\xeb\xd8\x04\xf3\x04f\xa3\xbf\x9c\x92\xb3H\x96d\xe6?<\x1b\xd2\xfa\x84\xd4\xef?\xad\xc1\xaf\xc3\xe3k\xb9\xbfA\xc8\\\xea\x96\x10\xcd\xbfQ\xb2\xa1\xbe\x0c\x9f\xd9?\x1aw?D\x18\xf3\xec?Q\x17\xa1X,\x02\xc0\xbf\xa6f\x9e\x17\xac5\xd3\xbf\xa6~\x00\xfaH\xa9\xed?\xb7{\xdan\x91G\xc1?\xb6 Q\x7f\xc9\xc5\xc6?\xca\xfb\xb9~\x0b`\xad\xbfA\x9f8^{i\xcb?y\xe14\x01\xc3S\xd4?\xe6\xea\xce\xe5m\xcb\xd2?}\x1e\x10\xb3y4\xcd?\x91J`\xa5\xdfi\xe4?\xe8\xf0\xb6U\xaer\xeb?\x0f#_I\xb2\xa5\xae\xbf\xa2o\xc7w\xdc\xacx\xbf\xa9\xac)y\x98u\xb9?\xe9lb\xef\xc81\xe3?\xdb\x10\x17\x00x\xa5\xb9\xbfl\xaf\xf6\xc0m\xed\xc0\xbf\x03\xab\xd9j\xc6\xeb\xd9\xbfd\xfe\xd0\xe9/\xe3\xc6?\xc7\xe4\x1f\xb5\x7f\xf1\xd0?\xa7\x10:yR\xb1\x94?\xd3\x06\x9b\xb9Kc\xe7?!\x0f\xdb=$C\xc1?\x0c2\x89.|\x06\xd6\xbf\\e\x9b\xf9\x944\xd7\xbf\xa9h\x05?`\x93\xf2?#\xc2\xb2\x00y\x93\xb8\xbf\x1dC\x07COR\xe4?\x8f\x9e<by\xf6\xd5?\x87\xb8\x08\x98\xc1\xacY\xbfr\x81\xaf\x8d\xe6\xa1\xed?-\xb3\xea\xee\xae`\xec?\x1c\x93\xee\xc2\x8b\x86\xce?\xb1\xeb[j\xdcX\xb7?\xafc\xf9\x8d\xb3\xae\xba\xbf\'5\xfel\xce~\xea?,w\xbe\xbe\x05\xdb\xe2?m>\xc96\x92 \xe3\xbf\x8e\x1e\xbaUEb\xee?\xf6\xfaS\x93@\xdb\xe5\xbf|\xdc\xd8\xf1!\x9a\xe1?\xd7\x9b\x1c\xcc\xe9e\xdb?!LaF\xdf\x8b\xc9?\xb2\x11\xd8\xf4c/\xe8?\x02\xdb\xd6\x98\xf49\xd5\xbf\xbf\xdd]\x0bZ[\xec?\n\xc9\xa2\xe1I\xdb\xc6?\xad-\xd6\x1d\xcf\x90\xc8?\x9d\xb1I\xa7c\x98\xc3\xbf\xb2\x18\x8e\x10\x05\xd3\xce?\xa0\xfb/\x07\x17/\xda\xbf\x8c\x0c\x1c\xdd\xcas\xef\xbf\xfc.q\xd6\x05\xf0\xcd\xbf\x92\xf5m\x12tI\xb7?\xa3{\xde\xb8\x0c\xaf5\xbf\x02\xeb\xf0\x90ha\x91?\xd8\xde\x04E\xfd\xd3\xe2\xbf\xe626\xaaN+\xd7?M\x03`l\xaa\x9b\xe4\xbfw\x7f\x83\xa3z\xcd\xe3\xbf3\x8dl\x03\\M\xac?5S\xe4D\xf4\xbe\xee?dn\x99\x924F\xd9?\xe0\xfd\xf7\xcc@J\xba\xbf\xe3\xa4\xaex\x0e\xfb\xe3\xbf6\xaf@0\x92\x1a\xe2\xbf\xc2\xc0\x17\xee\xa36\xc0\xbfi\xaf\x8b\xd2\xfb\xde\xc1\xbfxI\x99\xd6N\x9e\xe4?ati\x8b\xfcF\xe3?\xaf\x9c\x94\x87\x1cP\xbd?\xd3?\xb7h6\xef\x80\xbf\xfb\xc8\xe0\t s\xc8\xbf\xf6]\x00^@\x1d\xe5?Vx\xcb_\xa8\xb3\xe9?\xe6\xc9\xa9\xf0\x10T\xd0\xbf\xb3\xd3\t\x9d\x14\xb6\xf2?K\xce}\xc4\xf4\xec\xdc?\x0eE\xa3\xcf+(\xc0?\x8fR\xf0\xc3\x88Y\xc4\xbfn\x1d\x8e\x18\xa60\xb7?\n(\xda\x92o\xaa\xd5\xbf\xa0\xc4[}\xe6\x08\xf0\xbf}X\x1e\xd1T\x99\xc7?\xcff=?-\xf7\xe4?mI\xdb\n\xcd\xca\xe9\xbfNg\xdc#.\xd6\xdf?\xfc\x83&\xd0,b\xe1?\x9d\xe0\xeb|k\xc7\xb9?\x15\xc1\x04\xfd\xad\x94\xe4\xbf;\xe4\x91H\xbdY\xe8?\xee\x1c<\xb9\x91\x06\xe9?~\xc7\x90\x8f\x16V\xe8\xbf\x93\xabx^pq\xe6?y(G\xe3\x8a\xf0\xe4?ci%{\xde\x94\xce?\xa3\x02\x15>\xc3\xed\xe7?\x7ft\xaer."\xb2\xbfD\x11o\xcd[\x03\xe3\xbf\x1c\x99\xa5\xef\xcdv\xf1?/\x10/\xcc\xcb\xc6\xda?\xf8\\\x00ul.\xeb?\xbe\xad\xc8\xdd\x15\x03\xc1?\xee\xee\xcb\xdc\x02\x82\xc9?S\xd0\x92_\x1b\x89\xd5?t\xc2w\x0f\x8fX\xd3\xbf!\xb6\xc6q\xd9\x9c\xba\xbfZ\xff\xaf\xea\xf9\xf3\xf1?\x9d\xdc\x0cE\xf7\xda\xb3\xbf0\xd1\xf8g\xe0H\xde?\x9a9-\xd9[\x03\x85?\x1d\xda\x0c\xa2U\xa4\xf2?\x8a\xf8D>\xec\x8a\xda\xbf\xdbM\x9d\xd8f \x95?\xe4b|uts\xcb?8\x9b\xcd~h\x10\x9e?fs\x06\x8a\xf1a\xe7?i\xe8\x89eZ\xd1\xcc?mM\x8e\x19\xd0\x88\xe8?\xb1\xff\x96\xe5\x11\xe1\xd7?\xda\xa5\xe3\xef\x02\xb1\xee?v>\xfc\x99m\x95\xc4?\xa6\xd2x\xbd\xf4\x93\xe6?\x8b\x0e\xcc\xcaR\x80\xca?%\xe28?\xe3X\xb7\xbfJ\xcf\xe3\x96\xecG\xa5?\x81\xa1\xa8\xb3,\x07\xc0?\xbc\xdf\xb9\xd8\xec`\xcd\xbf\x05:\xe8\xe63\xa5\x9c?kK\x9e\xe0\x16\x0b\xe0\xbfa;/\xe5\x91\xfe\xe5\xbf\x02V\xe3\xb8f\x8c\xb4?M9\x85Y\xea\xbe\xce?Q\xd4\x1a\xef?\xa0\xe1?\x12r\xb2N\r\x95\xc0?L"\x00\x890\xae\xdb?j\x06\xa2\xf4\r{\xc2?\x9dh\x11\xf8\xea}\xd9?*\xcb\x15\xba^\xc0\xe6\xbf\xf0\x04\x96\xf1\xf0\xf4q\xbf9\xbb!\x18(\xb2\xea?dt\xbf\x91m)\xc2\xbf\xd5\x05?\xb4\xf31\xc9?\xfe\xfc\xeb\x8ah\xce\xa4?\xd1\x9e\x81\xefz\xc5\xe7?\x7fsk\x89\xa8:\xe0?x\xbb\x83^W\xee\x9b?k\x93N\xa1; \xed?\t^{\xa0\x03M\xb8?>4\xb5KfM\xed?\\qL\xf7b\x0c\xd4??\x17\xa2\x9fRw\xe4?\x96\x06F\xef\x16\x08\xf2?\xdb\xe8\x00\xd4\xb0\x89\xd6?\xeb\xc1<C\xfe;\xb1?\xcc\xb0|M\xfe\xea\xe4?*Z\x83\x0c\xd3t\xb1?\x95\xe2\xae?F\xd0\xc6?\xf0\xb3^\xc2\n\x17\xd1\xbf\xa1\xc0\xc0I\xa3\x91\xec?^\xa6\xf6x]\xf5\xe7\xbf\xc9i\x04\xe7CP\xaa?\xfb\xac\xbd\xffb\xd0\xce\xbf@\xb7F\xce#\x16\xe8?\xa7&S\xe6\xb1\x98\xef?e=\xf8YS^\xd1?\xb8q\x85\xec\xeb\x86\xca?\x82\xefO\xd8\xba\xd3\xb1?+Y\xe5w\xf2\xde\xec?\xd8@\xdf:\xf4\xc0\xdc?8}\x81RO<\xe0\xbf\x16\x80#\xbb\xf9\xf3\xe8?4\xcb\x16\xeen\xae\xda\xbf\x17sA\x0b{\xa7\xc6?\x8e\xf9\x1dY\xbe\x92\xef?\xea\xea\xa1\xb4\xc1\x12\xed?\xd34\x88\xa7\x0e\xa7\xb9?.CJ\xd5\x84U\xcf??\x8ds^\xb8\x8a\xb3?E\xcb\xb00\xc6\x8b\xd8?\xa8\xa6\xc1\xd4"\xd3\xde?E\xfe-\x05\xa6k\xde?\x03\xc6eC\x90\x15\xd0?\xa3c\x91\x10jw\xc3?\x83 \xf9\xaa"\x98\xe0\xbfl\xfe\xb6o\x1f\xd6\xdf?\xed\xbe\xc2\x9c%-\xab\xbf\x96\x9a\xb7bI0\xd5?xrDh;\xd7\xc9?:W\xb2\xf4\x14E\xdb?\xd0\xdb\xa6\x83\xceK\xe0?\xd6\xffq\xc7\x18\xf6\xa8?\xc6\xe0\x04\x82T\xff\xd5\xbf\'"\xf6L;Y\xe5\xbfNP ]\xd8\xa3\xb5?\xd7P \xc4\x9c\xc9\xc3?\xc9\x86L\xbfe5\xdd?a\xa2\x17O\xefF\xe0\xbfb\x06\'\x13\xa2D\xf3?)\n\x1d\xc7u\xb8\xc4?Oe\xf8\x90\x8f:\xba?\x83\xc5\xe6\x1b\xea+\xcf?\xdf\x88\xac\t\x0cw\xd0?\xb0\xc41p\x13\xbf\xdc?\xf1\x16$A\x84\x98\xe6?W|;a7n\xda?\x12<\x80\x97q~\xcf\xbfD\xcd4Y f\xd8?\x19\xf9\x93\xef\x117\xdc?\xc4\x00\xd5\xceA\xa5\xd0\xbf\xf6\x07\xe2\x0f\xa0\x11\xe7\xbf\x98\x89m\xdf\xeb\xbd\xd5\xbfy\xf1M\xd8Y\'\xe4?\xb3 \xa4)Bn\xda\xbf\xdb\xdf\x18Nq\xcc\xcc?\x91xS\x04XQ\xe5\xbf`\xb5\xb2\xcd\x8c\xd8\xc5?T\xcb\xb8\xff\xa4\xb8\xe2?\xc1\x1d\x12\x9b*w\xd9\xbfJO\xf6\x94\xff\xba\xae?i\xd8\xf4_\xe5V\xd4?\xa9/,fq\xe2\xaf?\xe0\xda\xc6\xba\xd9\x06\xd8?\xcf1\xa7\xfb\x1e4\xd1?\xa1\x80\x03\x94~\xde\xd7?\xcdk\x84=d_\xd0\xbf\x99\x99\xb7\xc5T\xf1\xdf?\xbd\x88k\xe1\xa6\xf3\xb5?\xd3\x93\xc1\x18\x0f\x11\xe2?\x0c\xe6\xa0\x7fpK\xe1?E\xc3G\x0cr\xf1\xdf?\xf1\x1d\xb0%!\x91\xe1?\xa2\x02\x06\xff\xda\x00\xcd?\n\x05`x(\xd2\xc9?w\x99\x1e\xa1\x8c\xa3\xca?\x9f\xfd\xed]\xa9*\xa6\xbf6\x91\xa3\xde\xc4\x90\xc6?\x80\x9f\xce\x19\xf0\xe2\xab\xbfj\xee\n\xd8V\xfb\xac?\xc0r2\xbd\xba\xe2\xe1?\x1dr\xa2d\xa3W\xc1?\xa3I=X\xde}\xae\xbf\xc9\xaf\xc9P\xb7t\xdd?"AR\xfb\xc1\xa5\xd8?\xe5PK\x1f6\x92\xd0?V\x83]*\xbf\xd9\xdc?F\xb8\x11\xa8\xdbw\xda?\xc8\xf4\xc8a\x93o\xd3\xbf~\x08uz\xcc3\xcc?+\xe4#\xde7\xc0\xde?\x9b\xce\xd4\xe0"\xbe\xc8?\xd5xC\x13\xfbj\xe3?\xaeT\x82\xe7\xd7\xa7\xdd?x`\xfe\x9b\xbe|\xda?Y\xab\xb1\x196\xc5\xe1?\xc6\xea\x19\x17\xc1\xda\xad\xbf\x84fOk\xb3&\xcb?I\xcb\x90\xd3\xbfg\xe4?|\r\xb3\x19\xeb\xe7\xaf\xbf|\x08)#=X\xe1?\xb96\x11\x84\xbf[\xea?\xa0\xb4\x1eY\xeaw\xde?\xb957x\xbe\xb0\xe0?\x88\xe9\x0e\x8c[\xa2\xe7?\xe2,\x7f^%W\xc4?\x95\x13\xf8v~W\xd9?\xcac\xdcI\xb9\xfd\xc2?\x16\xb9~\x91\xfbL\xce?%I\xfa\x8d\x12>\xe2?f\xc4\xde=\xad\xe5\xc3?\xef\x01\x1ah\rN\xd5?(\x9e\x18\xfer\xa0\xdc?!gv\xaf\x1f8\xe0?\x97\xa6\xf4\xf3s\x10\xc2\xbf-<=<\xafi\xd5?\xde+\x15\xc7\x17\xda\xe0?<\x93\xe0\xef\x829\xaa?\xbe\xf7\x04l\xf1\x19\xde?\xd0l\xe8:\xd2\xc0\xe5?\xbe\x1d\x81\xe3\xc8\xab\xc4?\xa5h\xfc4\xc8\xbd\xe5?\xc4\xe4\xd6\x08\xf8\xfd\xc1\xbf\xec\xad(&\xc2ce?\xaen\xbaH6\xae\xd7?\xb1\x95D\xefZ\xd6\xda?\xed\xe8\xbe@\x8by\xa9\xbf\x11\x81\xa5\x05\xe8\x02\xd9?E\x00\xbc\x9c\xd7f\xd2?\xd9K\x8a\x85\xd6\xd3\xde?ux\xc0\xdf\xe2\xee\xd0\xbf\x13\x12PM\x0b\xa5\xe5?\x97W8\xda\x86\xa3\xdb?\xb5\xc2\x8f;K\xa5\xdf?\x162\xef\xbdR\xd9\xb2?\xc2i\x81\x07\xfa\x03\xbc?\x04\x89\x80z\xe9\x15\xc1\xbf\xaf\xb3\xb1i\x9c\x01\xe4?\x02 #\xb2\x07\x81\xc9\xbf\xcc\x90\xabM\x87a\xdc?r(\x0f\xa2E\x91\xd0\xbf\xe8\x9cb{SP\xa5?pZ\xeaj[\x03\xca?\x02\xebh\x8e\xea\xcd\xdc?\x13e7\xab\x1a|\xe5?cg\xdd\x8c\x88\xbd\xca?\xd8\xfcVX\xbbi\xd5?\x05\x07\xb5\x0c,g\xc9?G\x8d\xcd33\x8f\xcb?\x9dL\xd4\xa5\xa5\x9a\xb7\xbf\xff\x8f^\xb8\x00\xde\xcd?f\xd4A\x85\x9a\xd5\xd2?z\xe3\x161/U\xd2?\x05\xe0\x06\xb8T\xdd\xcb?\n\xce\xd8h\x92\xf5\xcd?6\x93\xa0"\xb8,\xc4?b\xbd\xd8\xe4J\x17\xcf\xbf\xf2"+\x1dY\xb7\xdd?v\xa7F\xd0\x93\n\xdf?L\xa5\x1a\x99\x12\x87\xe4?\x10\xc9\xd6\x14b\xba\xdc?\x02\xeazs\x90\xb0\xba?\xe1=\x13\xe7\xeb|\xd0?&\xfc\x00=\xcf3\xd3?\x9bV?\x06k&\xb7\xbf\x9d\xb6$\xc723\xd8?\x96\x86\x1f\xde\x9c\x0f\xc8?\x83\xcd\xbbG\x1b\xf6\xbf?I\xf6\x93\xdf7,\xe2?\x0eY\xe9\xfb\xa6\x97\xdd?\xbc*\x1a\xbd8\x10\xe0?\xc3\xf1\xd8\xa08w\xd7?\x13S\x03*\x19\xa1\xc5\xbf\x07\xacnER\xe2\xcb?\x9a\xb7\xc2\xf9F\x9b\xc2?#\xa9\x9cI\xcc6\xde?Vx\x9b\x95\x06\xc8\xe6?{\xb2\x93\xaa&\x07\xb9?\x8c\xc6\xe6\x9b\r\xb8\xde?\x07K\x9ayA\x93\xb7\xbf\x0bO\xc5\x03\x9ct\xe5?\x85\x8c\xefB\xdf\x81\xd5?\x997\x1a>\xff{\xc5\xbf\xe5\xab\x8d/\x87)\xc6?@2y3\np\xda?\xf0\xb3\x1b\xb1]\x04\xc0?\x19\xdb\xbdG\xfet\xce?^\xa2\x1a\xec\xa0\xb1\xc3?\x92\xf6\'\n\xc0\x82\xe0?\xe3;\xf0\x85\xa4\x83\xc0\xbfd\x81\x83\x0c\xc3-\xa0\xbf*\x1e\xb3\x90m!\xda?\x10\x15\x06Wc\xf7\xdd?\x89\x7f\x17@\x88p\xca?&\xab\x01W\x18\xcb\xcb?G\x8ero\xe1s\x9c?\x85\xb5\xe9`Q\xcd\xc2?\x1e\xee\xdeFl\xd7\xcd?\x1b\x17,\xa5\xe1\'\xdb?\x04\xa7\x97%\x95;\xbf?\r7\xb47\x15\xec\xc0\xbf\xec\xf0\xef\xcb\x9a/\xc7?gv\xd5\x1e\xa3\x8a\xe8?\xef\xe3\x86\x1e~\x96\xd9?\xc5\x85\x17(\xc4\xac\xd7?\xfa\x7fH\xb7O8\xcb?\xc1\x93\x92m\x10\xe5\xb3\xbfU\xbfU3X-\xbf?\x8b\x95\x0et\xf8%\xdf?\xd9\xa2h<\xf6\x8a\xae?-vZ\x8c\xd1?\xde?\xed\x81\xb8\xac\xfb\x8c\xc9?\x04\xca\xae\xfcMe\xdf?m\x13"\xd1DWk?\xa42\xe8+\xf37\xdd?D\xbc)B\xe7\t\xdb?\xe4\xeb\x94@\xbf\xe4\xa0?\xd6,\x88\x10\x9d\xad\xcf?&\x94S\xbd\x8e\xdd\xd5?o\x17\x85\xb2\xf8k\xdb?\x07i\xfexx\xb6\xd7?\x12\xcd\x8a\x05\xf7\xcd\xe2?\xa8\xce\x18\x15\xbbb\xbf\xbf\x9c\xe4M*\x13!\xd5\xbf\xe9\xa7y\x9e\xb5-\xbc?5\x97\xaa\xf0\xcd\xfe\xdb?`eT\xd7\xfdv\xd0\xbf,64\xdf!\xa4\x8e?\x1b\xc4|\xe6\xb1\x97\xd4?\xf1\xf5\xa1L\x97m\xcc?G\xb3\xb9}h\x9f\xd0?6\x11\xa2p\xa93\xd4?\x8b\xb2&\xc6\x8c\x7f\xe1?\xa0\x94V\xd5\xb8\xd5\xd3?+?\xa6\x95;\xaf\xb2\xbf \x10l\xea\xb2+\xc2?\xea\xb2l\xb1U\x11\xd6?\xfbLI$j)\xe3?\xd7\xfc\xed\xa9s\x0e\xb4?\xe1\xfd\xfe\x1b\xc9\x81\xd0?\xdb"\xd9@\xef\xdd\xe3?\x1e`g\x9f\xbb6\xe1?\x03\xdeu\xc3\nX\xd7?%\x928\x8b\x00X\xd0\xbf\x8c\xb9\x01\x1b}I\xc2?.\x10\x1d\xb2\t\xf0\xda?\xdc~\xbb\x86\xd2\x83\xd4?\xdb\xac\xb5\x9b\x9f,\xb4\xbf\xdbh\xb8\xb5\x18R\xcf?\xc1v9^\xc5\x8f\xd5?\xd4\x08\xb7\xe9\xc2\xef\xd7?\xd7\xf7\xf2\xb2\xb2\xb0\xbd?T\xda\xf4\xbc\n\x9b\xe0?\x0c\xb9\x95\xa5\xb1\xa5\xc8\xbf:\xf6J\xcf\x85w\xdf?3O\x08t\x16\xb3\xbd?/\xa8\x88h\x89C\xe1?\xf5\x1f\xb80\xed=\xc1\xbf\xdd\xfd\x8f\x1b\x02\xac\xe2?\xed\xeb\x18\x0b\xdc\x96\xdb?\xc8\x85\xf5WH\xb4\xd4?~\x83q\xf0~K\xdc?[\x84\x1f\xd8\nD\xe3?\xa9\xf4\xe7{\x07&\xc5?\'\x07\xbcL\xad\xa8\xda?Sk7&\x9dn\xd0?\xf9&;]\x97\xb7\xdd?@\xb7\'\x9b8\r\x9c?oC\xcb\x86\xbc\x15\xd3?\x9a\xf2Y\xf0\xba\x18\xb9?UFU\xe5\x1cd\xe2?b\xc1\x94\xf9\xc4\x02\xd6?\xc74\xcb\x9a\x0b\xe2\xc8?\xeb<\xf4F\xbbn\xd9?Q\xb8\xa3\x0e\ty\xe4?<\xca\\\xbf\xaa\xc0\xe2?\xadeH\xd1\xfc\xb3\xd2?\t\xf3\xae\xf3e\xda\xd6?\x80\x15R6?\xdb\xab?I\x12:\xebI\xce\xd6?\xfa\x90\xdb\xe5\x1e\x95\xe3?y\xea\xcdL\xdc#\xcf\xbfL\x01\xe0\x04\x08\xd3\xe1?Z][\xa6\xbc\xbe\xce?=\x98\x81\x93a%\xe2?\xce,\x12\xaf\xdam\xc9?\xb0\xf44\x95\x0e)\xdf?`\xe18\xa4\x058\xd5?|\xfe\x83\x86\r\xef\xd1?0\x02\xe4\xae\xc2A\xa5?\xd3\x89V\xbez\x82\xb1?\x85ln\xf5GA\xb2?+\x95\x0e\x1c\xfdT\xd2?\xe8\xacKiO\x81\xb4?\xd9\xeaU\x96\xc83\xb6?Ux\x85\x8f\xc1\xed\xc8?\xce\x00tb\xd0\xf2\xa3?\xc6\t\xd47En\xc5?CY8\x1c\x04\xf2\xd5?)\xe3\xbb\xbf\xa6\x9a\xdd?\t"\x1a}\x7f\xce\xe3?sm\x9dOh>\xe5?kc\x1f4\xbe\x10\xe0?\x80\x88Dl\xe3\x87\xc9?rD\xc3\x16w\x9b\xbf?H\x9b\xddx\xd8\xed\xd5?V\xd6A\xef\xadT\xc5?{\xea\xe1\x0fg\xa5\xe1?\x9ba\x08p\xd2N\xc3?f\xfd1\x16d\xf5\xd4?\xae\xceXd6\xe7\xb3?W\t\xa08Vc\xda?\xcd\x8d\x06\x8a\x84\xc1\xd1\xbf\xde\xec\x11\x92u\xc0\xd2?\x19sm?\xc7\xce\xb2?/\xee\xb1\xebw\xbd\xd4?0/Dg\'\x0cB\xbf9?\x14V\x1e\x10\xdf?.\'&\x97\xbf\x01\xd1?)iwg\xbf\xe6\xc1\xbf\xe5\xdcL^\x99\xbd\xd8?18\x95\xbe\x89V\xd7?\xc9p\xa1\x03,J\xd4?\x07.\n\xaa\xdf\xfc\xda?\xbdD\xf8g\x9d0\xd1?\xd0%^\x97\x06a\xe2?\xf4$s\xe7-\x95\xe0?\xb8:4\xc2\x18\n\xdb?\xb0MBc\xe9\x88\xc3?\x9c\x80\xacX\x85\xfa\xc4\xbfS\x00\xc9\x89i\x9b\xed\xbf\'\xe4\x8d\xeb\xd4M\xcd?\xd2\xaa\x87\xd9\xc5D\xcc?[\xdc\x10,\xa4\xa1\xad?\x8f*\xf1\x9bq\xbe\xe6\xbf%\x94\xf5\t\xf4\xf8\xe3?\xba\'T\xf6\x8b\xd3\xc6?\xd1[n\x08\x9eB\xf0\xbf/\x96\xc439\xe5\xfa? \\\xb2\x1df\x89\xe9?\'ZQ\xd5]\x07\xbb\xbf\xf8_3\xd9\xf6\xa8\xde?\xfa\xe9\x1d\\|\xc1\xcf\xbf]e`\xfa#A\xdb\xbf\xd5\xe3\x01\xbd\x1a\x99\xea\xbf\xba\xa9\xb0{\x99\x0e\xb3?\x1fU\xc4\xec\xb2A\xb2\xbf\xe7a\x0f\xc2B\xbe\xe8?kKr\xc1\x1a\xf2\xb5\xbfF\xa3\xbd\x92\xe0.\xcb\xbf\xd5S\x9d\xbf\xf6\xa3\xe0?:\xe3[\xb8M\n\xbf\xbfF\x14\x0fN\x98\x9d\xe6\xbf\xba\xd4\x8c\xb2\xa3\xe3\xf1\xbfr7\xa5\xebM\x96\xce\xbf3\x8a\x9b\xe0\xbd?\xc4?e\xb4\xcd:\xf1\xb0\x81?\xaf\xf8\x9fT\xfa\tq\xbf\x02\xb8\x84!\x05]\xe1?l\xb9\xe0\xe8#\xd6]\xbf\xb4\xbdK\xb4\xb3a\xea?\xa4\x87\xe9\xba ]\xc2\xbf\xbeN\x1aS\x8c_\xc4?\xe4\x88\xaa\x82\x1dP\xe8?\xff\xc8K\xab\x0e\xf6\xda\xbfG\t\x96\x8c\xb3\xfd\xd0\xbf\xc3\xb1!\xb0\x87\x9a\xe2\xbf\x83u\xd4\x87q/\xe7?\xcc\xe2\x04\xd6\xcd^\xca\xbf\xfaM\xa4\x99Y{\xd6\xbf\xa9\x9d0\x8b\x1a\x1f\xea\xbf.\xe9\xb2!\xb5\xd5\xe4?v[\xf1\r\xef\xf8\xce?\x871&!\xcdA\xd8\xbf1TcJ\xe4\xb2\xd9?\xb0Z4\xff\xbac\xd2\xbf\xbf_{\xac\x15\xd5\xe0\xbfzK\xc0\xea\xf2\x00\xdb\xbf\xd2\x99<\x9e\xaa\x90\xf1?\xbd7\x84\x05\xe4\x83\xd1\xbf\x1e\xdc\x9e\xfb\xe6\x99\xd4?\xcc\x1b%\xf9K\x0b\xec\xbf\xfa;#~]`\xda?\xbd_\x9c\x12\xc1\x1b\xc1\xbf\xe0_t\xa8\xb8O\xf2?\x95\xdf\x92X\x80R\xc7\xbfj\xa2M\xfe\xcf>\xba\xbfg\x87\x8bc\x82\xe2\xb4\xbfA\t\xe2j\x9c\xba\xe3?\x14\x18<O\x18\xdf\xb6?\xd1\x0e:y\xbc\xfb\xe7\xbf}d\t\x84\xca\xc3\xf3?|\xc0b;\xc2\xa4\xed\xbfC"\xd49\xf5\xec\xd1\xbft~\x89\xd9\xd9\x00s?\x16+j\xd0\x8d\xbe\xde\xbf\xfb\x01\x94\xa5\x8aD\xe4?\xe9CZ\xbc\x03\xd9\xe8\xbf\x95\x9dF}\xf1\x9d\xed?x\xb2CT\x9e\x18\xb5\xbf\x90Z\xbb\xa5}\xcf\xa1\xbf\x94\ne.\x92T\xd3\xbf\xec\xd2\x13M\x7f\x1d\xd8?M|\xfbV\xb5\x95\xe8\xbf\x01\xb7\x845\x11e\xf2\xbf\'\x0c7\xb91B\xe5\xbf\x9ecJ\xdeoc\xe0\xbfKW\x89\x0b\xb2\xa8\xc9\xbfl5\xf5\xa3=\xa1\xea\xbf\xc7\x82\xb9oel\xf2\xbf\xc6\xa7\xb7\x94E,\xab?\x1b=\xb3\xc9ke\xf3\xbf\x7f7\'\x8e\x12c\xf1\xbf\xa6~^\xa0\x02g\xba\xbf\x04!\xc5\xeb\xc3\xb8\xef?\xeb\x1c\xd7\xb8\x0b\xbb\xe7?\x0b\xe8w\x7ft;\xc8\xbfu\x053\x96\xf3\xca\xf5\xbf\xbdK\x8a\xe8\x04\xdb\xf2\xbf\x016\x01i\x80\x82\xe0\xbf\xb63U\x02\xa5[\xe2\xbf\x18T=U\xe1\x10\xc3?\xab\xc2\'\xb9\x1a.\xd7\xbf\x1f\xc1\x06\xba&;\xaf\xbfD\xa5\\i\xd5w\x96\xbf\x896\xc5\x7fL\x13\xec\xbfr\xde\xc8ch\x0f\xb1?\xa8p\x19\xb1\xb0\xd5\xb9\xbf\x80\xec\xca\xaeI\xbe\xea\xbf\x85I\xdb\\|\\\xf8?\xe4\x14 \x1d\x03|\xc7?\xfc\x92\xe7\x1d*p\xe3\xbf\x00\xbc\x11\xe5r\xaf\xd1?\x8ao\xf5\xdc\xb8\x13\xba\xbf\xd7Y\xb7W\x05B\xea\xbfeP\x95\x9c\xee\xd9\xf3\xbf\x12\xf4N\x04\xda\xd1D?_{\xe8\xa1\xc11\xb6?OBH\x03K:\xeb\xbf\x00w\xd7HT\xb5\xe4?\x80!\xf2 +\xac\xc4?x\xf0\xd8\x96:\xf9\xbc?&\xb9\xbcI\x96\xa1\xe7\xbf\x17\xeb\x8f=\xbf4\xf0?\xeb\x16buzq\xb3?[&\x0c\xac\x16\xc5\xf2\xbf\x8c\x8e\x0b\x1a\xec\x98\xf7?\xe0\x17\x87\xfem\xc3\xde\xbf\x9e\xf7\\Q\x85b\xa2?\x187\xcec\xaa\x9f\xe6?\x7f\xfb\xfaS\x95\xf0\xe2\xbfO\x15M\xfem\x1b\xf2\xbf_\x02\x0c\xa0q\xa3\xdf?J\x9ay#\x1b\xc8\xc9?\xed\xe1bH\x9e\xac\x83\xbf&\xa5\xca\r\x881\xdd\xbf;?&\x9e\tj\xba\xbf<\x17n{\x968\xe8?Y9\x1c\xd4\re\xc0\xbfg-\x9b\n\x9b_\xcd\xbf\xd1\x1e\\\x9f\x81\x16\xe1?\x11"\xf7d\xb2*\xd1\xbf\xa3\x82\x01z\xd8\xd8\xb8?\x93m\xacZ9t\xe8\xbf\xd49\xfc\n7t\xf1?\xde\xcd\xab@\xcci\xed\xbf\xb3\x9b\xef?\xf7\x8e\xae?\xb0\xd5\x01\x88\x8b\x83\xd9\xbf\xbe\xa9 F\x84\x12\xce\xbf\xd4\x06Z\xf9\xed\xf7\xed?\x9d SF\xa2\xfc\xca?1\x9a\xbc\x13p\x9b\x95\xbf5VQ\x87\xd4L\xe3?\xdf/H\xbc\xaa\xd8\xd6?X\x8d\x143\xd2X\xa5\xbfQ\x92eJ\x90\xce\xb3\xbf\xc4\x11}q\x08\x11\xd0\xbf\xc5M\xa9\x85\x0c:\xe4\xbf3\x11\xbb{\n@\xe5\xbf\xa8\xd9\x9b_-b\xab?\xf6\xab\xe7T"(\xde\xbf\x19\xd6\xbdyKO\xde\xbfA]/w\x98\x19\xe4\xbfN\\\xc2\x9e8T\xf0\xbf\xcc\xbaM\x17\xa9\x97\xb0\xbfM\xff\xe7\x8f\x0e<\x94?\x0c\x02G\x8d\xd6\xae\xcd?\x9b\xdc\x8d\x80U\x9d\xbb?\xa9$\xe1\xaf\xb9:\xd8?N\xfe\xa7\xea;F\xde\xbf\xc1\xa2S\x85e\xa3\xe5\xbf@\xb7\xad\xd0\xe4\xe9\xe5\xbf\xae\xbe\xa0\xe7\x88\x91\xe9\xbf\xb2\xf3\xf5\xf0\xd1\xae\xe5?\xc5\t\xab\xc5\xb1j\xf0\xbf\xe0:\xf7\x97\xdc\xa7\xd2\xbf\xc3\xfd\x1c"\xedY\xe9\xbf\x9e\xf5:\x19\xe3\xaa\x8b?BV;*\xc7\x88\x9d\xbf{\xb6\xa0!\xa3\x01\xe6\xbf*Tf%\xe7\x94\xbb?iV\x1d\xaa\xc6e\xc7\xbf\xaf\xbamy\xd1+\xf1?\xafw\x7f\x81\xb2\x0c\xd9\xbf\xc2<b%\x8e\x89\xdf?a|`.\xbe\xfa\xf6?z\'P\xb6\x19Z\xdc\xbf\xd3t\x91\x9a\xad\x95\xd6\xbf\x9a\x92\x11\xc6\x08\xa5\xc8\xbf\xcf\xdb\xe0\x14\xfft\xd2?\x9f6\xdb\x8b\xa6\xde\xe1\xbf\xde\xb3iI\xd2*\xe7\xbf\xd9E\x8f\xfc>\\\xe9?\'\x17\x05-\x0e\xeb\xe6\xbf~\xc9r\xa6\x0e\x9c\xd4\xbfo\xfa\xb0\xf4\x8a\xf4\xef\xbf\xd28io\x16\x1d\xcb?\xc8\t\xff\xf3\x91\x90\xe8?\xa5\xbf\xd1\x89Z\x8a\xd3\xbfXi\x11\xa0+\x8e\xc7?Xh\xee\xa2\xb3W\xab\xbf\xfc\xca\x9f@\x84\xad\xdc?\x0c\x0c\xcd\x0e\x91\xd2\xca?\xbfQ\xd4\'[\xca\xef\xbf\x8e\x83\xce2\xb2\xd3\xda?\x10,\'c\x1e\x0b\xef\xbf\xb7\x88@\xdf\xcb\x11\xba?\x18\x8a\x02\xe2`a\xed?\x84\x1cI\xa8\x07F\xef?)[\x88\xbe\xdb\x96\xdc\xbfK(S.\xdea\xbc?G\xcb\xbc\xb5e\x1d\xe4\xbf\t\xe57\x84\x97\xce\xbd?N\xb1v\x8b\x91F\xee?2\x98@\xd0\xf9\xea\xc4?1\xe6P\xa2\x1aU\xa5?\xc1\xa8\xd6\xe8\xa2\x1f\xe1\xbf\x9d;v\xbcl\xc9\xe6\xbfG\xb4\xcd~o\x9c\xb1?l\xc9\xde\x16\xbe\x1b\xe6\xbf\x93kL`\xd5:\xc4?\xeb4\x1f1\xc8Q^?\x1b\x94\x99\x12Z\x92\xc9?u\xae\xaa\xe9P\xc5\xc8?Z\xcb^PYZ\xc2\xbf2s\xe8\xa0}t\xf0\xbfO2m\xcc\xef\xf7\xf0\xbf\xd1\xdefBD\x95\xcd\xbf\x19-\xfb\xbe{\x96\xc3\xbf\xb3?e9\xb8H\xec?%\xfau\xb3G~\xee\xbfZw\xfc\x1eH\r\xe5?\xbb\x8d\xc8\xd0\x9c\xff\xb5?G\x90:\xd5r\xfb\xa5?\x9a2\xa0\xf9\xc2\xfe\xda\xbf\x8a$\x85\x11\xb1x\xea\xbf\xac\xce\xb2"\x1b\xf2\xd2?\x15\x01\x84\xda\xfc\x1e\xe4?\xec\x1d\xd0\x1b\xc4\x99\xc4?0N\x9cO\xc4\x1d\xe3\xbfH\xc0\xb7\t\xbd+\xd3\xbf\xb4\xf7=\xe3\xba+\xc6\xbf\x92F\xfbaa\xcc\xe0\xbf\xcc*\xfd\x93\x08\xd7\xea\xbf\xec\x8a\xa90\xf8\x16\xe9\xbf\x1a\xfb\x87\x19\x07\'\xb8?/\x95S\xc2\xad\x19\xe3\xbf>.\xa6_fG\xc5\xbfK8\xc1\x8d\xe3\xbe\xec\xbf\xc7\x84\xc8)\x84\x9c\xd0?\xf1\x11<\x03\xc7D\xe7?\xe0\xc5\xd6k\xc9\xe4\xe9\xbf\xa8\xc7`\xf1)8\xd4\xbf\xea^6XD\xcb\xd0\xbf_\xb4\x9e\xfb\xca\x86\xd6\xbf!\x1c\x82\xe4\x16P\xea?/\xc6\xcc\xa6\x1c\x9c\xb6?\xf0s\x1e\x7f\x18\xf8\x7f?\xdb\xc5\xf5j\xfa\xfd\xe2\xbf3]\xabr\r\x84\xd3?\x10"\x98\x14\xc1\xdc\xa1\xbf60\x11\xc0(\xc4\xb1\xbfA0\xfd\xfc\x9e\xc5\xd2?\xfa\xe9\xa6\xf8\xd5d\xe0\xbf\xb8`Q\x1a\x9fx\x8d\xbfN\xd4\x8dH\x1c,\x9e?:iJ,oo\xd9\xbf5h\xb5\xa9{$\xda?H\x17.\xcf~\x8d\xce\xbf\xaag%\xf2\xdf\xe0\xee?\n\xf7|+r\xe4\xe2?)Hu\xf8\x05m\xd2\xbf!\xc6k\x0b\xde\x93\xb1?\xa6*\x1a\xf1\r\xfb\xe5?\x94\xcd\x8c\x8d2F\xc1?cp\xe5\xe2\x8e\xf3\xb1\xbf\xd5\xe6\xb3k\x10}\xb2\xbfy+\xfd2\xceH\xe7?k\xc36\x98<\x89\xe4?,\xd7_V\xe8\xb5\xc4\xbf\x1dD\x8f\x97\xdc\xb6\xc5?\x88\xbb\x05FF\xa6\xe1\xbf\xa7\x0fm\xcf\xdb\xec\xe1?\xa6\x87J\x0b\x94I\xef?\xea\r\x89\xdbJA\xe0?\x91\x89\xba\xb7\xc5\xa7\xe0?Zs\xfd\xe5\x0cE\xec?"\xdf/\x0b\x8b\x05\xd9\xbfH\x96\xe7i\xbel\xe7?\x8a\xe5/\x15\xe3[\xdf\xbf?8\x93mp\xfe\xe1\xbf\xeb\x93b^\xbb\x92\xdf?\xe5\x05\xbe\x93\x90\x9a\xe5?G\x82.5\x1d\xe9\xd7?\xd2\xdd*K\x17a\xec?o\xba\xd5e\xe2\x98\xe4?\x81\x04M_\x8c^\xe2?\xc2\x1b\'JU\xe2\xe7?\n\xdd\xbf\xda\xd5,\xe1?\xff\xbak&Q)\xe7?\xa05\xa0{\xf8\xe3\xe3?t\x82~\xb3^\x9f\x98\xbf\x9f;\xc7xg\x04\xda?I\x07\xba\xe77\xc1\xe3?s\xb90\xbd?\x07\xe0?\x8a_g(\x1e\x97\xd4?z?\x89NV\xf5\xcb?\x0b\xbf\xc7A\xe4\xfd\xce\xbf\x08T;\xa2\x1d\xe6\xec?\t0@o\x8al\xc9\xbf%v\x1f\xcfz\x19\xe7?\xa0>p\xbda\xc9\xdb?\xba6\x0c\xbeo^\xce\xbf\xb7#\xfe\xaa\x15\xd6\xf1?$q[T\xfe\xfd}?\xe3\x9b\xa2\x7f\xf9\xb0\xea?\t\xfa\x0f\xe2\x95E\xdc?\xa1\xdb\xeb`ik\xd6\xbfz{\x86\xe91\x80\xf3?h\xa8\x8b(\xe5\xf2\xdb?]\xdf\xb4\x83\x1f\xde\xd4?\xb6\xb1\x92\xde\x8d\xfc\xdf?\xcb!\x98\x9e\'\x1d\xe0\xbf\xac\xb7\x84T:{\xe2?\xca\xf9\xa1\xb4\xb9\x92\xe4?W\x1d\xeb\xbe\xa7k\xd6?&\xaf$\xceN\xf6\xdb\xbf\x94y\xf3y\xe5Z\xec?\x1b\x04\x8d\x07\x11\xcc\xc5\xbf\xc6\xb6\xd5\x89H\xb0\xde\xbfm%\xa5\xff\x1e\x8f\xe1\xbf\xe8\x82e\xe6RZ\xdd?\xb3\x18\x0f\x800\xee\xe6?\xd1[c\x89\xe0\xf4\xdd\xbf\xe0\xbd\x015\x80\x94\xe9?\x95\x93Q\xddG\xa7\xf2?\x12\x18R\xb2\x94\r\xe4?p-\x90\xa2cY\xe2?~\xc1o\xff\xf8\x1b\xe9?[0\xc72\xea\xf2\xb9?\x8e\xf9-\x88\xcb\xb7r\xbf$M\xccxv\x03\xe3\xbf\xf5\x8b\xe6\x159\xac\xde?`\x0c\xb3\xd7\x11F\xd9\xbf\xa3\xba\xd5\xf1\xd7\x87\xa1?u\x8a\xc9\xf8\x99\xa5\xe1?\x05\x0f\x8c,\x03\xb1\xec?\x83~\xf5\x00\xf4:\xe0?w\r\xe5\x07u$\xcb?\x81\xf0\xb0\x9a\x12z\xca?\x15b\xca\x8a5\xe1\xdf?]\xbf\xc4\x1b\xe7\xc8\xc3?x"\xf5N\x95\x9c\xd3?i\xa1%s!|\xe0?\xf4\x8e\x87\xf5\x88\xea\xe1?\xadj<\xe3U`\xe2?C\xaa\x1a3P\xb8\xdb?\xc7$\x02\xea\x0fl\xda\xbf^"\xf0\t\x10\x7f\xd2\xbf\x85N\x10\xf2\x90L\xc2?N\x80\x80R\xa3\xc0\xe3?&}/\x82\xac\xc5\xe1?\xe4\xf0\'v\xa5\xbd\xdd?\x02\x99:\xb8t\xf0\xc1?s\x98P\xe4\x10.\xd4\xbf\x13!]\x7f\xdf/\xd2?\x05\xcc\xbc5\xd0\x80\xef?K\x94g1\x96\x06\xb1?}\xb656\xc0\xd9\xc0\xbf\xe8\x08l\xf0\xc7\xfb\xee?uy\x8dcE\xb0\xe5?\x01\xf5\xd0\xd0\x0e\x87\xc5?\x11\xd7\x81\xf9\xd8\x0b\xe2?\xa0\x1d\xa1\x9a\xb9\xa9\xdb?\xd7P\xf0\xc0\x1e\xc86?\x11\xde\xc7N\x87\xae\xb0?\xdeE6\x9d\r\x87\xdf?\x11\xbb\xb0!10\xe9?\x94#IO\xb8\x1e\xf0?\x8c&_8\x9c$\xf1?B\xb7W\x8aiG\xd3\xbf\xc6\x9e\xde\xf6\x8a6\xd8?MZql\xcc\xc2\xde?\x8b\x82\xabi\xd4\xcb\xd7\xbf\xf0V\xda"\xad\xfd\xe6?\x9am\xeex\xa9\xb2\xed?\xa8kW(\xc7\xd4\xda?\xeb\xcd8\xdc\x1f\x86\xc5\xbfDzK\xd6\xee\xc8\xda\xbf\xde\x9ec-\x00r\xdd?\xd9\x7f^HL\x89\xd8\xbfb\xd9FO\xc0\xd8\xf0?+K6\xc2\x87K\xb0?A\xbf\xc7\xf3\xa8\x9e\xd4?\x93f\xba\xdc+\xeb\xda?5z\xd1\x1eP\xf3\xe2?\x8e=5\x80\x9c\x12\xc2?@\xfe\x97\x1d\x1e\xec\xb0?\x8e\xd3}v\x12o\xf3?\xdc/\xf84>\xd1\x95?\xc2\xccN\x90\xc4\x1b\xb9\xbfy\xa6\x01\x16\x9fK\xe1?\xddo\xc7\x06"M\xe7?_"\x89\x1f\xf1 \xe7?\x95S\x03\xdf\x19\xb7\xdb?\xc9\x9e\xcbd\x18G\xea?4\x91r\x13$\xa8\xe3?\x19\xe3\xf8\x9fi\xa5\xc3?\ng\xda)6\x04\xe8?\x0b\xec?\x19\xe2\xfb\xe5?\x8f\x80\x8d:\xf5\x92\xe5?\x8b$\xc1\xb4\x95\xe1\x81\xbf(\xa0C\xfdq\xd6\xda\xbf\xe9\x9d{a\x97\xc9\xd9?+\xcf\xd6\xd9:q\xda\xbf<\x85\xcc45g\xcf?\xc0\xfflk;\x9a\xe6?\xfbm\xb6 \xf2.\xe4?\x0c\x08}|\xbc.\xe6?_\xec\x05\x18\xa0\x12\xf2?\xc8\xcb^\xb7\xe9\r\xe5?\x1a<\x05\xeev8\xe9?\x1d\x13\xa3\x8fb\x1d\xf4?\x054\xd1XV<\xee?\xa5{\x11G\xb9u\xe7?\xf5\x12\xe1\x84\xc2\xd1\xdb?7I8pQW\xe1?V P\xce\xd1\xbe\xed?/\xfeA~`\x12\xbc?f\xb8\xdd\xcb\xf6\xc9\xe0? \xa7\x1a\xe5`W\xdb\xbf\x94wy\x16V\x87\xe0?\xcd\xaf\x9b\x8b\xda\xa0\xd7?8@\xdcP\x93v\xe1\xbf8K\xe6\xfa\xde5\xe0?M\x18\x0e\x98\xf6W\xe8?3\\\xca\xb9\x9b\x02\xde\xbf\x02 \xc7%\x0ft\xe6?d\x0f\xad\xa0\xc1\xb2\xd8?\xf1\xf6\x80\x1f6\xc5\xda\xbf\xcb!\xb7\xa2\x8f\xc2\xdc?\xd0\x8b+\x06\xa3A\xdd?\x84\x1f\x177\x16\n\xd1?\xd0\x80\x11\xc1K\x00\xa3?OA\xeaf\x1a\x95\xab\xbf\xce\xf5\xe3\xb0\xe3N\xbc\xbfx\x86\xf0:v\xe8\xa4?\x84\x84e\'m\xa5\xea?\xcb\xc5Y\xd0_dz\xbf\xd3%,\xd3\x98\xb5\xa9?\x0c\xf6\x18\xc4\xb4T\xb5?\x1a\xc6c\xab\x93g\xe6?)w\xd2\xf0\x05\xef\xe6?\xa6\xd5@\x1e\xa2P\x9b?(\x90\xa88x\x98\xd2?\x81E\xab3\x86\x06\xe9?\x12\x8e.l\x07\x82\xcd?\xaa\xdaX\xf3\x00\xba\xde?\xe8K\x15$\xbf\x9e\xb1?,)@\xcc\xe4u\xa2\xbf\xd4\xcd\x98\x1f\x9b\x84\xd6?\xb3\xca\xee\x1cK\x0b\xcc?\xc4\xae\xd7\xd5t\xc7\xee?\xfb\x1c\x99\xe2\xfc\x81\xe3?O[\xd8\xe3\xb8\xd8\xe5?L&\\E\x94\xdf\xe0?\'\x99\xc4\xcb\xbb\xbf\xdd?\xeb\xa7\xd4bI\xc1\x91?\xfa\x13)\xedf \xca?\x10?=\x084p\xf1?Eby\x8d\x1e\x18\xe0?\xe5\xf0:\xef\xc6K\xe5?\xa7\x82<p\x14s\xd3\xbf\x137QW\xc9\\\xdd?\x9b\xc3%\xfe\xf3\x15\x92\xbfB\x87L\\cZ\xe8?!\xb1\x05J\xec\xf0\xe4?u\xef\xe1{\xf0\xdc\xdb?Um\xa7$$\x1f\xe6\xbf\xf3dH\xe0\x80\x91\xe1?d\xf0\xae\x07\xf6\x14\xe3?K\n>\xc3c\xe0\xca\xbf\x83\x10\x17\xec\xa6\x87\xec?j\xc9\xd0\x12>\xde\x85\xbf\xd7Da\xb55\xcd\xe0?\xfd,m\xa9\xa4\xf6\xe1?\x9a\xb8\xcd\xb9\x8cp\xec?\xbc\xa0%F\xcb\x89\xd6?7J\xd0\xbc>/\x93?ogX\xd4b\x01\xf1?\xf6\x08\x82<}\xdb\xe0\xbf\xb9\x93\x199,\xa9\xdc\xbf6\xeb\xbd\xf1\xbc\t\xe0?\x8f8\xdc\xd1\xf9\xb8\xd7?\xe3\x82\x87\xdb\xc7\xd6\xe5?5\x9c>\xcc\rb\xe5?\xed&\xdc\r\xec\x13\xc9?\x92\x8c3o\x8e\xb3\xe2?\xbeS\xe5U\xcb3\xd7\xbfi\xcb\x03\x8fR&\xd6\xbf\xe5Za\x7fO\xd0\xd4?\'A\xc76`\xe1\xd1?\xa6\x00)\x8d{\xb3\xdf?\x85\x15.\xef^\x01\xb2?<u\xbc\x84\x91T\xe0\xbf7\xc1\x94\x90Nx\xec?\xbc\x81\x13M\xe0\xeb\xe6?\xbd\xf9\xfe\x96@I\xb5?\xac\xf0\x98],~\xef?]\xfd\x9b2\x04 \xd9?\xddU[\xff\xfff\xdc?\x97|\x803\x10\x05\xe2\xbf\x8e\x19\n\xfa\xaf\xb4\xeb?\xa7\xd5\xb3\xb4k\x9a\xec?}WG\x81\xc4\x0e\xea?\xcbc\xcf\xd9\xff\xc7\xe5?\x10Y\x87u\xbe\x9b\xe2?"p\xd5Z/\xfc\xd9?yc\xd2\xd6[q\xae?!\xaa`\x93@k\xb1\xbfh\xd2z!\xbd\x8a\xd4?\x82\xddD\xffJ\xfa\xdf\xbfx\x0b\x06\xdb\xfc\x8b\xe7?\xe6M\xff\xaa\xc6\x9c\xe3\xbf\'A\x9cm.E\xd4\xbf\x94k\xcf\xc9\x95\xe2\xea\xbf\n\xf6\xf2\x85\xd7&\xdb\xbfQ\x81\x86#0\xed\xb8?]\xccU\xb9v\xa8\xd2\xbf\xe7\xf1\x9a\x9ae\x7f\xd3\xbf\xc7}\xa3\x87-C\xe1\xbf\xd6\xd0\x14H\x89R\xe3\xbf8\x0e\x0e\xbbcT\xd2\xbf\x93*\xec\x97\xe5\xf6\xe8\xbf\x08m\xa5~\x83\xa9\xe4\xbfjS\xf9\xc7\x96\x00\xb5?\x17\x84>\xc2\xaf\x84\x97\xbf=ASMJ\x9d\x9e\xbf\xe4\xc7\x95\x86}\xff\xe7\xbf\xbd\xf7#\x92\xc5\x84\xec\xbf\x01\xed\xd5\xdc\n\xac\xd6\xbf.\xf3\xb3\x80s\x01\xd8\xbf\xfbM%\xff)\xba\xef\xbfg=Z-{\xc5r\xbfl\xa7\xf9m\xc5\xab\xd5\xbf\xd8^\xb3q\xb7D\xe4?\xbbC\r\xe4\x92H\xc7?\xed\xaa\x00}J\xe2\xe2\xbf\xef2\xf3\x85\x9f\xde\xe8\xbfwx\x84b\xeb\xb3\xe8\xbf\xacq=wv\xaa\xee\xbf?\x03a\xa0\t*\xe8\xbf\xf4\xf3\xab\xc5!\xa6\xed\xbf\xd8\xfc\xe0\xbb\xffP\xe4\xbf%\xe83m\xb6\x94\xec\xbf\xdd\x02\xa6\x1a\xa6T\xea\xbf\xc0s\xfe#\x96\x01\xdd\xbf\xce*\x8el\xd1`\xd1\xbfu\x82~\xb7OB\xd6\xbf\x8b\x96;\x93\xa0(\xee\xbf\x83\xd4\x80\xa2\xe8\xe6\xe3\xbf\x1f\x0e\x99\xdd\xf9K\xe4\xbfT\xdf\rI\xac\x14\xc6?\xf7\xa57\x00r\xdf\xe4\xbf\x071\xea\x1e\x92\xc7\xf2\xbf\x01\xdf\n \xd3\xfd\xb4\xbf\x80TM\xc8\xccg\xe7\xbf=\x9d\x18j\xbfm\xe4\xbf\xd8g\x9d\xed\xf6B\xc5\xbfsO\xd0*-\xd2\xe3\xbfz\xe2\xe0\x8e\x1e_\xdc\xbf\x12q\x1c\n\xecW\xe4\xbf\xf4/\x07ST\x12\xe9\xbfC\xd4\x86\xf2\x17\xf9\xdd?"\xb5p*\xbed\xef\xbf\xb6z|(w\x0c\xdf\xbf\x9f\x1c\x0e!\xb1\xee\xe6\xbf\x11\xea\x15\xc9s,\xe6\xbf\xa1\x18\xc3\x92\xe6\x01\xe0?\x16\xd3\xceoN\xad\xe9\xbf\xce~\x9d\x11\x0b\xf8\xec\xbf\x06\xa9\xbflpK\xe3\xbf3}f\xa8\xe7\xc8\xd4?\x16\xf8P?\xc8D\xf0\xbf{\x01\x89\xe1\x81\xcd\x99\xbfV7\'\xb87\x81\xba?\xce\x87\xaf+?\xdc\xd2?\x14\x8b\xea\x9dy\xf5\xe2\xbfMD\xbaAxW\xe4\xbf\xd3\xe6Y\xd31\xe7\xed?\x03\x91\x97\x0fy\xbc\xef\xbf\x04\xacx\x03\xa1\xc8\xf0\xbf\xc0)o[\x90\xd8\xeb\xbf\xa9\xf8\xd9\xbe\xad\xb2\xdd\xbf*~\\\xe6\t\xda\xed\xbfn\xed\x8d\xc7\x80\xc5\xcd?\x84\x0b~\x0c\x83\xcb\xc9?\xec\xfe\x00N|\xd1\xf4?\xd5\xe7\x8a5\xde\x83\xdb\xbfRp\x16\xe6\x85D\xe3?\xc6|\xd6\t7\x85\xbf?\xc0\x1b\xd7\x93\x89\xea\xc4\xbfeH\xae\xf7(\x92\xe8\xbf!\x1f\xdabx\x1e\xa7?[\xf1\x07q^h\xc9?\x00\xdeFm\xd9i\xdd\xbf\xf1\x1a!;-\xa5\xeb\xbf\xab\x04\xf9\\\x1aW\xed\xbfN\xe6}\xdew\xce\xe3\xbf\xb8\x13r\xc8ue\xba?\xc1\xb0\xa2f\xba\xe4\xae?&Q8\x13\xe7H\xbc\xbf*\xd5\x0bW\x82`\xd9\xbf25\x10\xb0ioy?\x99\x86\xb0N\xdbb\xcc?\x84\xe66\x89Oh\x93\xbf\xdcq@\x7fjd\xf0\xbf\xcf\xb4\r<;~\xe3\xbf\xa6\xe3\x80KZ%\xe4\xbf\xcb68\x9a\xad\xb5\xd0\xbf\x85\x11\x9eF\x04\x1d\xe5?t\x85\x06\x0f\xb8-\xe7\xbf\x99\x94\\}\xc7r\xed\xbfGf<\xf9\xdd\xd1\xc6\xbf\xb8\x15E\xf3\xa9\x14\xe4\xbf\xd7&i\x8dF/\xe8\xbf\xc7\xde\x0fR\xdf\xec\xdd\xbf\xcb\x8a\x1f\x1f\xe1\xf1\xd5?L\x10iu\xadi\xe7\xbf\xdb\xfe\x1c\xeeh:\xe5\xbf_H\t\x129\xba\xd0?=`\xf9.B\r\xd6\xbf\x8c]\xff\xe7\x81\xf7\xe6\xbfBC\xdb(\xe7i\xbf?$\xbaM?\xebw\xe4\xbf\x84\xfe\xde\xe1r\x08\xf1\xbfO\xb5\x05\xc8\xc5*\xb7\xbf\x84J\x19\xf0\xa4\xd7\xc6?\x89\xb3?\xb6\x14\xcb\xe8\xbf\xeb\xbe\xe07hL\xb6?\xd7)\xf1\xdbw\xbe\xea\xbf\x90,\xd9\x81\xe1\xbd\xf1\xbf<q\\\x86=\xe5\xc5\xbf\x80H\xc7vY\xec\xe1?\xbd*q\xc5\xe0\xa6\x9a\xbf\x9f\x99\xdfRz\xe2\xe5\xbf\xe8\x1d\xf40\x01g\xc8?#\x94\xcc\xec\x04\xb5\xdf\xbf\xd0\xdaU\x01`\xad\xb0?\xb6\xdfV\xb1\x97)\xdd\xbf\xad\x1e\xa1P\xdc\xe6\xe1\xbf\xca/\xf3S\xc9\xd5\xf0\xbf\xb6\x87]\xee\\}\xe6\xbf\xcb\x19\x14\x91\xade\xd2\xbf\x89\xd6vb\xe9%\xe3\xbfm\x894Ls \xe0?\x8a\xe8\xb5\xaed\x07\xe3\xbf\x86\xc1\x9d\xb0Hs\xd3\xbf\x87\x1cFp/,\xe3\xbf\xc59cWo\xe6\xe3\xbfi\x19\xf2~Q\x9d\xd0\xbf\x86\xb5\x8b\x8es\xf2\xea\xbf-\x07\xdb\xfbm\x00\xde\xbf\x16h\xffo\x02\xd8\xdd\xbf\x13\xee\xcbs\xe8\x88\xe9\xbf\x9f"*\x7f\xa5\xd4\xe8\xbf1\xad\xb0\x00\x9f\xd2\xe1\xbf\xb5\xd3,\xca7\x99\xd8\xbf\xdf\x04D4+u\xdd?\x0e\xab\x0b\xb1\xce\xec\xdd\xbf\xd5L{c\xa1Y\xde?\xd5\x0e\x04U\x99p\x8d\xbfC<}\xf7u\xd2\xe1\xbf\x1e\xedkZ|\x1d\xdf\xbf\xbe\xdc&\x9b\xac\xf4\xda\xbfy\x01\x98\x94\x8c\xd7\xda\xbf\x07_\xb1t\xb5x\xe8\xbf\xbcD\xb7g!\xb4\xeb\xbf\x9f\x97"\x7f\xbf5\xed\xbf\xed\x83\x98%M\xbe\xea\xbf\xe4\xc2\xb1\xac@\x15\xeb\xbfh\x90\x12\xaf\x10\xdd\xdc\xbf\xd5H\x06\xd6/n\xdf\xbf\xd5\xe4\x1c$8\xd1\xdb\xbfX?s|\xdc\xf5\xd2\xbf\xe7\xddd^\xf4Q\xf0\xbf\xdf:\x9f\xda\xcf/\xe2?\x1f\xf7\xb6\x180|\xe4\xbf\xca\xf4J \x9d\x94\xd5\xbf\xcc\x12\x94F\xbcm\xcd?(N\xf9\xbb\xccp\xe4\xbf\xe7\x0fO\x173\xe4\xde\xbf\x1b\xe2\x1f\x88\xff4\xca\xbfm8\x9e\x1d\x95`\xed\xbf\xbcB\xb4~85\xef\xbfeS%(\x8f\xdb\xd4?\x16\xec\x02\xe2\xbb\xbf\xeb\xbf\xcf\xf8e1R\xc9\xeb\xbf\xe8\xd9Fi\xeef\xdb\xbfl\x1e\x8a\xb3\xed\x82\xe0\xbf\xf7\xa9\xb7}\x19A\xda\xbf\xff\xf1\xc6\x18\xba\xe8\xd6?r\r\x98\xdd\x86\xa6\xcc\xbf\'\xf0\xa8L\xf9\r\xdb\xbf\xeb<\x16\x16\x8b\x03\xcd\xbf&\x08q1p\xb0\xb5?\xa9:\x1fL\xbeB\xcd\xbfU\x8e>\xdc\xce\xe8\xca\xbf\\S9\x929#\xe7\xbfK{\xd1\xef\xd2L\xe1\xbfs\x876\x96?\x90\xdd\xbf\x15m\xbd\xfb\xb7\'\xe2\xbf\x9d\x1d \xad\xe0\xb0\xd4\xbf\xd1F\xb1\xbc\xbf\xe7\xe6\xbf\xc84?\x99\x85}\xd8\xbf=\xfe\xfe\x9d\x9f*\xdb?\x9c\xc3\xf1\xbc\xba&\xe7\xbf\x04\xc1;.\x95E\xb6\xbf\x06&\xc8\x1e\xfag\xeb\xbf\xfc\x90\x05\xb0\x1a\xb4\xe9\xbf\x93i\xdb\xca\x94\xbf\xef\xbfBN\x9fi[\x13\xe4\xbf\x01\xf5\xa1&\x97:\xec\xbf\x86c\x9a\xd0\x13\xe8\xc7\xbf\xedO\xb24\xc6\xa7\xe9\xbfF\xeb}\xf8{\x08\xef\xbf\x826\xd0F\x9a\n\xe4\xbf\xd9_\x1b|\xfc\x94\xd9\xbfP\xb8\x12\xfaa\x8e\xca?\xf6\xa8O\x00vr\xad\xbfB\xcc\xf9\xafX*\xb4\xbfZ\xb8<\xef\x937\xe4\xbf>(.$e\x02\xf2\xbf\xff\x85\xd0\xf3\xe6_\xe9\xbf\x99]\xfb\xf1\xc1\xb1\xcd?\x1dM\xae\x0b\r\x9d\xf1\xbfm\x99\xf0\xe4\x03\x14\xe0\xbf\xdcR\xd0>t\xb9\xd9?u\x96H\xc7\x88\xe5\xd6\xbf\x9d\xda\xd3\xbc\xda\x1a\xe6\xbf\xa9\x0e\xbaX\x0e\xaf\xe8\xbf\x8c\xf36_\xf2>\xe7\xbf3q\x87\xf5\xe3G\xcf\xbf\xc8\x11\x00\xfdO\xca\xe5\xbf\x0b\x80\xe3\x063\xfb\xc0\xbf\xf7\x1b\r\x83!\x05\xee\xbf\x89.\x06\xa9\xd7\x82\xdc?M\x0f\xde\xbf02\xd1?\xa1\x00\xa0\xb3\x8d\xf4\xec\xbf\xf1\xd5\xd1p\xf9\xfa\xea\xbf\xff\x9b\x1a\x94\xdb\x13\xed\xbfqf\x8e\x15m\x87\xe4\xbf\x1d \xdcm\x19\xa3\xd9\xbf(\x80\xe6\xd3\xd9-\xe1\xbf\xc4G7\xe0)p\xa6\xbf\x03^\x05_\xd0\xdc\xad\xbf\x8b\x8d@\xb9n\x87\xc9\xbf\x11D\x87\xbf\x7f\x94\xe5\xbf \xec\xd5R[R\xd4\xbf\xb5\x95!VVl\xb6\xbf\x06\xbaKI\xe5y\xe5?\xa4\x8a\x95\xa68\xbb\xdd\xbf\xc5\x8ex\xeetb\xe9\xbf\'\x8f\xbd\xae\xc8\xe7\xd2\xbf\x0c\xe5\x99!\x18\x19\xea\xbf\xe6@4\xd2\xef\xbb\xe0\xbfW\xdeXa\xb0\x90\xe5\xbf\x8a\nd\xb4\xfb\x92\xc6\xbf\xd2\xbc\x8b^\x0f\xaa\xe9\xbf\xbdl\xdf\xd2\xab\xb1\xed\xbf+\x881\nKz\xe5\xbf\xd95D\xb2\xa2\'\xf1\xbf2\xf2\xfe\x01J\x04\xea\xbf\x04vc\xe3\x9e"\xe4\xbfBf\xb8\xa8\xcb\xce\xd9\xbf\xb8\xa7\x9cV\xce\xbc\xc0\xbf\xd1\r\xde{\x8f\x88\xd8\xbf\xd8\xd9_\xb6\xe7\xe9\xf4?U4\xe9\xf6`\x15\xaa\xbf\x18\'Y6y2\xd5?\x19\xfc\n\xb3\xd4\x04\xdc?\x84\xd7\xed\x81\x10\x12\xe0?\x91\xa2\t \xb8\x03\xc1\xbf\xa2\xed\xf9\xdf\xe2 \xc1?\xac`\x02\xe8}*\xda?\xcc\x96\x1c\xe6\x0f\xcc\xde?b\x9d\x92\x1azi\xce?\xab\xc5\xc3\xa1\xa8\'\xd2?Z\xe6`:St\xda?\xf6TZa\xaej\xf0?\xffy\xa8\xbd\xbc\x00\xe1?\xa9l\xe5\x02y\x9b\xd3?\rz\x84\x04D\xfe\xd0\xbf\xe0\xb9\x81\r\xc2\x17\xd4\xbf\x9a\xc7K\x10L\x91\xeb?-\xfb5:kG\xe4?n\xc8d\x86\x14\x96\xdd?]\'\xb7\xb6\x01\xca\xaf?k\xec\xb8\x18\x88\xa1\xe8?K\xe7`\x9f\x7f\xb3\xd3?\xbe\x04B\xb5\x007\xd7?\xce\xda\x9774"\xa4\xbf\xce\xd7,\xaa\x0fQ\xc4?\x0ee8n.1\xe2?\xc8\xab\x87\xfeH\xf3\xdf?\x9e\xfa\x0b\t\xf1\xfb\xa8\xbf.\xc8\xd4U\xd6<\xc8?\x18\x96K\xd9\x97\xad\xec?\xa8-R%\x1cf\xd1?\x88\xf0]c3\xa1\xe0?G\xf1Sj\x1b\x9c\xe7?Lp\xbd\xebI\xb1\xf0?l\xd5\xed\xd9]\x9e\xb3\xbf\x1a\x0f\xfa\xffKo\xe2?z\xfb9M\xa9k\xf2?\xd7\xe9\x94@\xf2\x81\xe3?4\x9a-\xbes\xc7\xe1?\xf4=\xdcIn\xac\xe6?\xa8bf\x8eZ\x0c\xd2\xbf\x13\xf6\xa0#\xc3\xe0\xe5?\x0f\xa6\x05\x95\xd7\xe5\xe9?g\x8dB\xdb6Y\xf1?\x12i\x81\x1cd\x87\xe6?\xff\x0cZ\xa8\x80\x03\xef?\x95\x0eK7\x80\xc5\xf1?uiI^=H\xd4?O\x8c\xc4\x01e\x82\xdf?\xa5\xc0\xecXD=\xe6?\xdd]-~\x89\x8f\xf0?\x8c\x87\x05\xe3\xa4\xbc\xad?\xa0\xcb\xf4\xc4\x01~\xd8?\x0c\xd2-\xc4.\xa1\xe3?\x95\xd2\x07\xf7\x89\xa3\xde?\xc4\x81\xda\x04gc\xeb?\x980i\x1a\xc4b\xa7\xbf\xed\'\x999\xfa\x92\xc3\xbf\x8b\x1b\x88\xd0\xf7\x82\xf0?\\\xd4\xaf\xc8s\x13\xec?T\xb9el\xcc\xec\xcf\xbf?%\xac\xe0T\xf4\xe6?q\r\xfb\xa9\xdf\t\xc3?\xc8[\xbf\xfd\x95H\xe4?\xf2\xf5n\xf4\x8br\xd2?\x85\xff\x04y\xa6}\xed?\x95\x93\x94l5\xd3\xe5?\x92\x03~\x19\x0b\xe5\xc4\xbf_\xbf\x19\xb7\xe9\x96\xe1?\xe1]E\xc2 \x06\xec?i\x91\xa2\xbcn\xb7\xe9?\xc9\xceg\xcc\x99\x13\xcd?\xaetVg\xee!\xec?d\xe4\x93\x1cl\xa6\x92\xbf\x89\xa14\xc8\x05\xa6\xa1\xbfu\x12\x13\xef\x99\xaa\xb4\xbf\x93&\x87H\x8aQ\xe1?\x16Q\'\xda\xa7i\xb2\xbfX0\xda\xa5\xff\xf0\xcf?\xf5D\xcf\xe2\x1e\xe9\xe5?\x9d\x89\xec\xa4\x03o\xf0?\xca\xe1\xc6xC\xa6\xe2?\x04`k\xf0\xd9C\x95?\x0e\xc4\x18\x89\xd8\x9b\xe8?5\x1b\xcc\xd6<V\xe0?U5\xcd\x87\xa4\x10\xc9?\x07\xf2\xa3\xa0\xc0\x13\xe4?\xee\x8d\xfa\xeag\x1e\xd9?\xff\xcaVYX\xe1\xc5\xbf\x9f\x86\xc9\xe4~\x8e\xb4\xbf`\xf5\x9c~\xd3\x13\xbb?\xad4z\x0b\xac\xc6\xc3?\xc9k9\xd0\xecz\x9c\xbf\xe3$;\x99\xebf\x91\xbf\x8c\x07*E4[\xe7?\xc7\x0b\xb9q8O\xf0?ML\xe99\x86\xab\xeb?\x07\xa5ye\x9c\xb0\xeb?\xd7\x9dr\xd8\x95\x90\xb3?>K\x0f\xf4\x18\\\xdb?\xc2\xea\xb4\xf5\xd6T\xe5?\x15D4;_\xb4\xe1?\xd6+\x0b\x1b\x8bB\xda?\x1a\x9f\xd3\x10\xfe\xa9\xc6?\xfe\t:0\xcc\xfe\xd9?\xa5h\t\xda\xfas\xcd?-8\xb0\xb4\xbd\xa8\xe5?\x02->\xc05W\xeb?\xde7\x05WPw\xc5\xbf\xa7gx\xc12\xd7\xd2?\xb3\xe1;X\xce:\xf0?\xff\xf5}\x86&\x06\xd6?\xfb\xdfs,z\xf4\xe2?=*\xdcf\xb0_\xe7?\xc4L0\xd3\x02\xc6\xe0?\xc7\x12M\xfa\xf6\r\xc2?\x05\xe0\x12\xbb\x04n\xc8?\xd9ZS,\x10\x9c\xd4?\xc2\x02Q\xce\xa6d\xeb?U\n\xa0u\x99\xd3\xe2?\t(\xc6\xa8\xb5\x0c\xdf?\xfa~o\xcf\xa9\x1b\xbe? \xfa<3N^\xc6?N\xfc]\x00\xcb\xd7\xef?e|\xd2sQ\x83\xe4?\x1c\xc2\x93#bC\xc3?$|~\xfe\xbc\xa4\xf3?\x12\x81\xca\xc7\xb4\x9a\xc4\xbf1MkIJ\x00\xce\xbf\xda?\x8c\xaau\xac\xe5?\x8a\x0b\xbf\xa2{\t\xe4?\xd4O\x7f\xf9\xa4\xd5\xe9?\xaa\x85\r\xa2eX\xd9?\x16\x98\xae\xda\x16^\xb0\xbf\xd8n2\xf8\x82\xe8\xd2?\xcez\x8ak\x1b\xe5\xe5?\xafzm=h}5\xbf\x8b$\xe9\xfe\xfb$\xea?\x97\xfc\x80\x97k\xc8\xd4?\xb4b;J\x8a\xab\xe0?\xd9\xdf\x14{\xfe6\xd9?O\xbdc\xaa\\1\xea?\xdak3\x8a\x83\xf0\xca?.\x95\xebi\xf5\x87\xeb?\x03\xfa=&\xacu\xe2?/&\n\xf6\x84\x0e\xeb?5\xffn\xaa\xaf\x07\xc0\xbf\xa2\x82\xf1A\xc65\xe8?\x12H1\xcck\xf9\xc2?\xea*\xdf\x16^\x9a\x9a?\xcb?#K\xa4{\x97?\x07\x8c\xcfQ\xa0%\xe7?\xae\x90\xab\xa8\xb10\xde?X^<h\xf5\xd5\xd0?\xb0T\x94u,8\xf0?\xa2X\xbb|\x93\xd6\xeb?\xa8\xd7\xb1\x8e]m\xe1?\x85I\xa8y\x83\x86\xcc?\xe6\xf8\x1dF\xd8>\xbd?{n\x8b\xf3\xa1\x99\xed?\xc1\xaf,\xec\xbf\xd9\xcd\xbfPV\xd8\x8c\x9e\x12\xd0?\xa5~k\xb8\xba\xe5\xee?\x1d\xd0\x80\xcdjx\xe2?\x93\xf9rZ\'\xb8\x89?vEP%\ne\xe3?\xad7\xe7\xa5\xfc\xeb\xd9?~1\x82\xdbPy\xcd?\xcf@\x00,\x9b\x84\xe2?\x02\x1c\xce^<uz?b\x009\xc3\xac\xa5\xe8?\xecS\x87%H\xaa\xec?\xd1M\xd6\xd1\x15q\xe8?\xc1+Y\xbcZ\xb4\xc0?c-\x15\xf8ZL\xf0?>Y\xd3\xd5\x7f&\xde?\x80M\xe7\x9b\xc8\xdb\xef?@\xf6\xf8}\xfb\xae\xe7?\x92\x1c\x96\xf9\x10d\xe4?\xd4UE\x0c\x14c\xe0\xbf\x15Fj\x06\xe2\x8e\xe5?\x91 hG\x89,\xe1?\xd5\x8e\xebg\x9fq\xc6?\xbe\xb4\xae\x10\xc8\xe0\xd6\xbfA\x8e~\x1c\x8d\\\xde?>\xd8\x85\xf2\x94!\xe0?\x1d\x89\x02O\xf11\xd9?\x19\x8e.\x1e\xe5\xaf\xe4?\x98\x00\xb0\xd3\xf1\xc8\xeb?\xf49Z\xec]O\xec?\x81\xda\xa01A\x92\xf0?.\x85\xc0@\xb0\x1f\xe9?^\x9f\xee\x0f\r\xeb\xc9?Z9M/\xdb\xef\xd5\xbf6\xb9\xb2\x9e\xba#\xeb?|/\xffZX\xc8\xdb?\xd9\xebH\xdb\x19\x98\xeb?\xd8\xa1\x11a\xbe\x07\xd0?\xb5\x9dm\x93\xaa\x19\xef?\xe6\xd4\xcc\xa3v~\xf0?\x87\xc8\x1et;\xd9\xcb?\x90H\x9cH1V\xd6?\xebbk\xe6J\x85\xf2?\xfdY6\xa8Ux\xd1?{r\xf2\n\x0b\xd1\xac?\xe1<\x12\xf3\xb6\xc2\xe1?\xc8\x97\xc2\x00\xd5\x15\xdb?\x7f\xf6\xda\x01\xdf\xae\xb2?\x00\xa4\xd3\xf5\xbdS\xe0?|x\xa8r\xd7\x93\xdf?\x96\xa72\x85\'6\xed?|\xc4\x84\xca/<\xf5?\x82T\xc9\xe5\x8f!\xb6?\xd7\xf6\tp\xa6\x06\xf1?\xcaf\xce\x8ft\x95\xd3?\xe8s\x18\xa2YO\xb6?\x15iLk\x89-\xd9?\x1e\xe0R\xf9\x0e+\xa7?0\xde\xbe\xb9q\xd6\xf2?(k$\xe1\xdc\x9d\xd6?\xdc\x00\xc0 ))\xa0?\x9a\x085\x06\xee\xce\xd9?|\xe5[\xf1\x9d\x11\xe2?i\xdc~hZ[\xde?\x85\xa7\x94*9g\xd5?\xbd^H\xf1kO\xd6?N\x92\xed\x87\x8cu\xea?H\xa9\xb9\xf2\xfe#\xea?\xbd\x80\xcb\xb0\x9a8\xe6?G\x8e\xfa2I\xb8\xe9?\x9b\x89\xb2+t\xda\xf0?X\x14X=\x06\xaa\xe3?\xe3\xc6[}\x9e\xd3\xbd\xbf)\x14\xf5\xad\x90q\xe1?%\tRLb|\xe1?*\x81\xe8W\r[\xdf?h{\x0b6\x84X\xda?\xbf\x90DR\xdb\x87\xba?\xb0j\x822\xa0\xe6\xb8\xbf;\x86\xed\x0bT\x9d\xa2?\t\xb6R\xe3C\x8f\xe0?\xe6\x93;F\xfc\x96\xe6?\x88\xad;\x0bT\x80\xe4?\xb9\xa1\xcd\xb8\xc3\x14\xf0?\x9e\xb6\x01\x05- \xf4?\x93?\xecLP\xd6\xd6?\x84\xe0s\x93\n\xbc\xe8?\xce\xaa\x1a\x9d\xc5\x86\xec?\xf0\xefYR\t9\xea?\x84;\xe7\x9c)n\xe1?\x81d\x82\x01\x12k\xec?\x0f\xb2\xe3\xdeL\xe1\xe9?\xf9\x03\xd6\xd1`\x15\xe6?C\xabw\x08\xf1\xeb\xc4?\xf3\xe4\xd6\xbb:U\xe8?)\x84j\x01\xc5<\xf3?\xb2\x1cby\xaf\xc5\x95?\x13\x1f\x07\x01~=\xe6?\x92\xa5\xf2&h\x84\xd6?\xf0\x84#`\xd4\xbe\xc4?\xd6Sl\xe4,)\xd5\xbf\x99\x94g()\x83\xca\xbfQ}\x0f\x9b\xa9,\xb4?\xdb\xc1\x82t\xa5Y\xf0?U\x967\x7f\xd4\x15\xcf\xbf\xcb\x8f\x08\xfb\x8f"\xe1?;\x16\x96)E\x8d\xe4?~\x04\xd8\xb7$\x00\xcc?\x8b\xd5\xd6\xf9\xb9c6?d\x10\x8e]\xdb\xaa\xda?\xfb\x98\xa5+\x9b\xdd\xb3\xbfi\xca\xa7u\x8d\r\xd7\xbf{D\x7f\xb9 w\xb9?\xa1\xf1\x9f\xb1\xa1\x1b\xcb\xbf&\xa9c\x9a\x8c\x9e\xef?.\x15Q5#\x00\xd4?\xc7\xc7\x96O\xb7\xdd\xe1?j3\xb4%.\xf5\xdc?Mk\x01Fw\xf9\xda?\xb4\xb0\x8b\xa0\xb2\xc7\xe5?\xca\x9c4k\x84\x1c\xc1?\xcb\xed\xad\x1c\x96$\xef?P\xff\xab\x92\x00\xb3\xda?\xfe\x8a\xb9\xfe\x1c\x8a\x90\xbf`\xe1=\x7f\xb6\xe5\xd3\xbf\xbf\xd0\x8a\x1b\x13\xfd\xb1\xbf%\xa8\xb0\xfc\xfa\xc5\xd6?\xcb\xf6\x1b\xd7\xde`\xe9?\xbe@U\xb8\x00\xb6\xd0?N\x1f5\x92\xb2\xef\xcb? \xca\xa4\x9d\xe9b\xba\xbf@m0Gm4\xdc?4\x13\\\xf6;\x84\xd1?\x9f\x12\xae\xd2\xae\xc1\xcc?\xc2\xe0uP\x9d\xc1\xa3?\xfd\x15\xd02\xb3\xa7\xe5?\xe3D\xeb\xb7g\xb2t?\xc6\xb5}\xc7\xe1\xd1\xac?\xc3b+\xa8\x16\xbd\xd2?\xac3M\xc9Y\xb3\xa4\xbf\xdbp\x8d\x9c\x17;\xc1?U\xa4\xe9\xa8\xd1n\xd4?}\x9a-\xf5\xbdx\xf7?E\x0c R60\xc7\xbf9j\xf2\xf3\x01\xdc\xd3?R\x83\xe9\xca\xe0\x02\x8d?\xb3\xb7\xc3d-\x9a\xe1?wA~\x08\x86l\xdd?<\xbc\x0c\xb5\xbde\xa6?0\xdd\xd5\x8d\xf8U\xe6?,\xcb\x9b\x02\xa3\xcb\xe0\xbf\x8d\xde\x0c\x07wJ\xd1?J\xe2~\xec\x9f\n\xbe\xbf)OQ\xf5\x0b\xf6\xc0\xbf\x94+\xd9\xc8\xf1\xb6\xd6?\x17\xact\x83\xa1p\xdf?\x9fN]\x1e~\xc9\xe6?\'6\x8b\xa1\x8e\xf9\xc7\xbfL\x83A7\xc1^\xf9?\x14\x05\xcc\xa7\xb1^\xe4?<\xd5\x96\x0cK\xed\xed?\xf0h\xa9\xc8\xab\x8d\xe8?\xb2q|w\xa2\xde\xd8\xbf\x93\x14\x7fO\x9d\xa2\xc8?\xfa\x11\xf1\xf3\xe2\xdd\xb5?\xc0rs\xd8\xbf\x9a\xe2?a\xc0\\\x9c\x0e3\xa9?w&\x8a\xd7M\x0e\xe5?\x00\x0b\x07\xbd\x82Z\xe2?\n\xe1\xc6\xe9\xea\x11\xce\xbf\x17b\xb1n\xdb\xa3\xdf?\x84\x1c\xa0\xa6\x9e9\xdb?/|g&\x977\xcc?\xefz\xfajQ\x96\xc7\xbf\xe6\x18\x1d@Q\xff\xc6?\xd0\x97\xd3\xe9YT\xeb?,\x95k\x9d\x8d\x94\xe2?&\xf8\xc5\x18\x9d#\xa6?\x83\xbd\xc3\xa5\xdb\xd2\xde?\xab%\x01\x88\x80\xe6\xdc?\'\n\x02u.*\x9b?vH\x91b\xd4\xdc\xd9?\x1e\x86MiD\x89\xdb?\xf2\xcb\xf7,\xfa&\xd8?\x01J\xa8\xaeN\x9b\xc3\xbf\x8d\xfa6![\t\xe6\xbfh^\xf3\x1c,G\x19\xbf\x1c\x042%~P\xc0\xbf\xc8\xeb\xd8H)\xc8\xe6?\xad3\x86\x94+(\xe3\xbf\xff\xcc\xbe\x0b\x1a\xfc\xd7?\x17\xa5\x1a\xe5\x05+\xdd?wj\xeeV/"\xb5?\xbfQ[\xc3\x00\xff\xe9?\xc2\x0f\x01\xe7\x90\x9a\xef?d5`F\xc8\xe2\xd7\xbfO\x98\x9b\xec\x9ca\x89\xbf\x82\xb0\x19!\xfa\xe2\xb1?@.;Nz\x00\xe3?\x8c\x91"2%\xce\xb8\xbf\xdb\xc5\x1b\xb4\xcfm\xcb\xbf\xdd\xc6\x8f\xc7\xc3]\xe4?\xfa\x18/}\x08\r\xe4?\x07\xebx\n\xcd\x06\xd9?\xba\thSo\x10\xc9?oa\x11\x19\xa2\x02\xf2?\xd9{ct\xaf\xc5\xd7?\xfc\xeb\x14\xef\x0fM\xe6?\xca\x8e?\x0cjy\xda?\x8c\xd6\xb4\xeb\xd4.\xc1?3o\x03\xed\xb8\x86\xd9?\xfa\xab\xb8;\x12\xbc\xe4?\xdd\xfe\xfa\x8cg\x97\xce\xbfv\x0f\xc5\x90Z\xfe\xe7?\xccqj\xe5\xdaR\xbd?%\xf7\x86\x1cvR\xb5?S?\x11jT\xab\xa1\xbf\xb2F%iy\xc5\xe6?\xcc\xa9\xc4!\xbb\r\xb1?\xad\xa69G\x9d\xd1\xed?t4\xe0|}\xf9\xb4?n\x93So\xa3\x99\xa7\xbf\x9d\xa1:b\x03q\xf5?jLk\x19\xce?\xd6\xbf\xdc\xc5b\xd3\xf9=\xce\xbf\x0bc\xb9\x0c\x83\xc9\xe7?\xd4\x16\x07lP\x14\xd7?\x86\x92\xd5\x03\x9f\xdf\xde?\x01\xdc\xb0\x1e\nG\xdc\xbf\xdc\xa2\xc6\xfe\x05\xf6\xd7?\xa7l\x80x\xc4*\xd0\xbf\xe40%\x085\xb6\xf2?b\x85\x1d\xad\xf7%\xd7\xbflwm\xe6\x89\x89\xd4?\x1f[\x13*\xb78\xda\xbf\xc9(\xc3xR\xba\xcb?\x1bm\xfa9\x84\x98\xad\xbf\xbe7&\x99\xc2\x94\xe5?\xefQ\xf0\xd8\xec\\\xbd\xbfv g\xea7Q\xd6?:S\x0e\x8b\xd1D\xba?\xee\xac\xbb\x8arU\xe0?\xc7\xca.rP\xa2\xae\xbf\xc9\x08\x91#\xc4\x12\xed?\xc4fw\x98h^\xe5?\xee\xa9\xa8\xd2;M\xf1?\xaf\x18\xca\xdd\x90o\xd0\xbfg.\x93\xb6\xc8P\xc0\xbf\x84\xe4\xfb\x95\x08\x9f\xcd?\xf9\x85\x92\'\xa6~\xd8?7\xdfZT\x06\x14\xc1?Q\x018\x90+_\xaf?\x14\xd0g\x1a\xaa\xe4\xcc\xbf"R\xfc\xa4\x8b,\xdd\xbf\xa7\x9d\xfc\xde\x8f\x03\xd4?\x18#\xfc\xefh0\xe6?\x14\xb1\x831\xd5U\xd7\xbf\x15\x9f\xe0\xb6Q\x9d\xc8\xbf\xfd\xc7\xa7_\xde\xbf\xf0?\xd52A%\xb0\xc7\xc9?d\x9b%\x9eL\xf8\xe4?y=\xb1\x12\x18.\xe0?\x15Hw8\xf5-\xe1?\xf9\xfe\x8bk\xfd\xf0\x84?/3W\xc9@8\xcb\xbfo\x05\xfag\xfb\xc7\xb1\xbf~y\xc8\x15,P\xcf?\xa2\xe7m@!\x04\xd8?\x94\xf8\xe6p\xe6\x82\xd6?\xe6\xd5\xd9\xc0\x17\x17\xcc?\xf1\x16\xa2b+\x83\xc0?\xa7\x03\xd0\xf0{\xf3\xc8\xbf\x112\x86\x15\x98\x04\xe3?\xa4P\xd2\x03\xc1\xa0\xf2?\xf1\xf1h\xb7\x17\x07\xe7?\xfc\\>L\x12\x16\xdc\xbfY%\x86\xf3\xb47\xb1?>7\xd3(g\xba\xdc?3\xd7\x07Y\xf5\xfc\xe0\xbf\x8d\xb6G6\x06\xe4\x96\xbf\x10\xfdI\xc8\xeb\xc1\xdb?\x8f[Q"A6\xd4?\xcc\xc2\xf5\xa5\x9ee\xa1\xbfi\x07\x1d\x0c\xcf^\xc5?x.\x83\x9a@\x06\xe0?\xbe\xd2&N\x0b\xc8\xb4\xbf\x16\xdfE\xf25P\xe6?\xe6.\xfb\x85\x8f\xea\xd1?i\xd9\x1a\xe1\xee\xc1\xc8\xbfv\x93\xd8\xd3\t\x01\xce\xbf\x8e\x15\xba<\xf0\xf3\xe2?\xba\x89\x1ac\xe1\x95\xf1?\x01\x85\xbd\xd3\\B\xc0\xbf\xfa_\x82\xbe\x1fb\xd9\xbflK\xb8Wq\x94\xbf\xbf\x97w\xdc\xf1\xee\xa6\xea?A\xf0_X\xf4\x17\xd7\xbfD8\x13\xee\xf4\xf2\x8a\xbf\x84\x03\xb8\xc7`n\xef?\x81\xa7\x1e]|\xbe\xb4?\x9c\x9c\xea\xb3\xcd0\xe2\xbf\x80;\x1e_\x0c\x96\xe1?\xc9\xee:\xa9y\xbd\xd2?\x1d\xd5\xc72\xb0~\xc2?@\x98\x8dl-\x02\xc9?\x94\x82\xcd\x08\xd8t\xb4\xbfQ?ki\xf8\xea\xe2?\x07\tOA*\xe0\xec?$\x98Q\x91\xd3\xa2\xb0?\x9cB?\xdf\xdbw\xe7?\x9f\xce\xf5(\xe4K\xf1?2\xb9\xa5\xcd,3\xc8?\xc4\x08\xe3 \t\xc8\xdd?\x0b\x17H\xf8\xac\xc2\xc4\xbf\xc7m\x90\x8f\xe3`\xef?\x14\xc3xYM\xf9\xcb?\xf7qq\'e\xfc\xe0?\xa3\xaf\x05\xaa\xd1\xde\x94\xbf\xbc\xe2\xa4\x87*y\xf8?\x06\x14\xe9\x15J\xa3\xcf?\xe3N\x9f\xd1\x90\x90\xb7?\x8e\xb2]\xaa\xbf\xfc\xeb?\x98\x0b\xda&f\xda\xd7?"g4\x19\x85<\xd0?\xf7\xf91\\\xe1\x9d\xb0?\x94\xb0\x9d7N\x06\xf2?\xe2\xb1#d\xd0\x99\xe6?\x108\xa6"\x81|\x7f?J\x95\xde\xa3.\xbc\xd4?$\xc1\xefi\x18\x0f\xe5?<\xa6\'\x11"\x92\xf2?"#\xe7\xbd\x04%\xe3?\xad\xe8\x10\x0bl\xc5\xee?{\xdf;\x01\xb6\x01\xb4\xbf\xce\xc9!\xc5\xff\xe3\xf0?\xa1\x97\xad\xb1\xda\xbe\xc8\xbf2\xff\xaa\x98[\x93\xda?\xf3\x9d;\xaa\x10\xb1\xf3?n*\xef3RX\xd1?\xba\xf5\xc6cC\x87\xe7?zw\xa8v\x1b[\xe2?0\xf7\xf5\r\xe5\xcf\xc6?\x91\xca\xf9l3G\xd3?\x860XS\xbfa\xdf?\xed\xe2\x93\x8a$b\xe7?\xadG\x1f\x8e\x9e\xf3\xd3?\x1b\xf8\xdav\xad\xa9\xe5?_\xe4\xc3E\xf2D\xad?\xf6v\xc3;X\x93\xc0?\xd4\x9e}Q\x9a\xb6\xae?b:\xbd}Vw\xc1?Jo\xfb\xa5\xe0\xb5\xd6\xbf\x87\x93\xa8\x07J\xb2\xc3\xbfw\xbdC\x92\x9c\xa4\xc2\xbf\xe7\xe79M\x9a\xcb\xcf\xbf\x8ahF\x86\xd3?\xd4\xbfU\x13Wy<\x9a\xc8\xbf:\xfe\xc4c\xa1\xeb\xc2?\x87\x89\xb4\xe30\xad\xbf\xbf\xb2\xd2k\x95\x10\x15\xd9\xbf\x9f\tp\xb1B\xb2\xc5\xbf\x11\x92)\xf6b\x1ei?_e\x81n\xf5\x7f\xe0\xbf\xe2xU\xf4\x1c\x8c\xe0\xbf(\xa5\xf6\xcb\x95\x8b\xda\xbf\x0bUY\xbc\xa2\x01\xd1\xbfx$\xc8\x1e\xa69\xd2?7T\xc36\xe2\xd4\xa2?E\xbb\x13\xe8\x82\xf1\xe2\xbf\x02\xfb\x9e\t\x9d\x86\xdd\xbf\xfagW\xb0.\x98\xd0\xbfu\xd6\x170jH\xd4\xbf\x14\xdc\xc1\xf2\xa9\xbd\xdb\xbf\x97\x89\xf2\'^\xd7\xdb\xbf\xac\xe0\xfcI\xf6\x9e\xd0\xbf\t\xab\xf5r\t\xe2\xcc\xbf\x05\xa5\xfc\x1b(\xca\xd4\xbf\xfbf8\xbe\xbe\x8f\xc3\xbf\x03\xb5\xb9\xf94\x16\xd1\xbf\x05\x00Y\xef\x18\x01\xd2\xbfy\x88\x10KW\xcd\xdc\xbf8\xc8\xf1\xc1\xae\xf3\xd6\xbf\x8f>\xd2I\xcbl\xb6\xbf\x14\xee\xaaN\xe4\xa1\xe0\xbf\x86\x10\x97\xe8\xba*\xd6\xbf\xf1\x03\xdd\xb7\x1fl\xcc\xbfL\xc8\x7f\x15\x8d\xa3\x9a\xbf\xf9&V`\xa6\xaf\xc8\xbfB%\xbb\xc2\xef\xb2\xd9\xbf\xad\xc1\xf2\x84\x8d\xcf\xd0\xbf\xcbV%\\$\xf1\xd4\xbf\xd2\x83D9=-\xad?AA\x1d4W\xb3\xc1?\xc2/\xa9\xbb\x10\x15\x95?{\xbe\x85\nR\x10\xd8\xbf\t\x1d\xd4\xef\xff\x98\xc1\xbf;\'dT\xd0\xcc\xda\xbfK;_?\x0c\xd9\xd5\xbf(\xf7#\x0f\xc0\xc7\xcb\xbf\xde\xf1r\xfd=\x1e\xd1\xbf\xa5\xc3\xb1-\x88V\xcc\xbf\xef\xd6/\t.\xc8\xc3\xbfmod[\x11k\xdd\xbf\xba\x9a\x89\x95^\x81\xd5\xbfc\xc4\xf5\x0fo\xe5\xb0\xbfEy\xd2yv3\xe7\xbf\x03\x93H\x9c\xe1\x98\x98?3\x16\x01A\x1d\xd1\xcd\xbf\x80\x9d(\x95\x1bb\xc4?\x04\x0b\xc8\xef\xd2\t\xd7\xbf#a\xd1\x9e\\"\xe3\xbf\x11v\xa1\xb7< \xe3\xbfC\x1d\xed\x85`u\xbc?\xc7\xb6\xb4b\x7fX\xcc\xbf\x17-h\xdc\xc76\xc7\xbf\xec1\xae\x83,h\xd7\xbf-)\xc7\xee\xf89\xd2\xbfz\xb4\xd6\xf9\xdbc\xe4\xbf\x98\xa8\x8fd\'\xca\xdb\xbf\xbf\x81\xda\xa4\xfdb\xbd\xbfR\x8d\xb0\xef\xf6w\xda\xbfC\x19\x17F\xb8~\xe2\xbf\x11- 9D\xf7\xdc\xbf\xd0lly<[\xb8?dNC\xe8B\xa0\xdb\xbf\xecW\xfa\xd1\x12\xa2y?\xab\xa11\xb0\xacvS?p\n5\xa0O\n\xb8\xbf`\xa5.@O\x9b\xdf\xbf\xe0\x043Ml\xd4\xb2?\xd0B\xf9}\xdf\xd0\xd5\xbf\x80\xf4@:\x8c\x9a\xdf\xbfc\x98tu\xda\x1a\xe3\xbfD\'_\xc1\xc6\xb7\xd8\xbf\xc8:\xe7Z|\xec\xcb\xbf\xf1\x13-\xd7\x8a\x9f\xdb\xbf\\\xf0\xf37yn\xe0\xbf\xe3\'\x00-\xfa\xd0\xd0\xbf\xd54\x85\x92\x01\x11\xc9\xbf\xfb&\xe9cY\x8c\xd4\xbf\xbb\xd7\xf9\xd7\x854\xc3\xbf\xed\xaaW\xa3\xf1l\xd1\xbftl>\xa7\xf1\xce\xb8\xbf\xf4\xa6\xd9\xae\x90=\xca\xbfEhxu/\xc2\xd1\xbf\xa0\n\x14\x12\x8e\xe0\xcf\xbf\xc3\x8ez>4)\xcc\xbf\xf7S\x83v\xef\xb9\xe1\xbf\xb3\xd3\x194\xd0\xec\xe1\xbf\x90E\xec\xa8A\x8d\xe3\xbf\xdca\xf0y\xf3s\xce\xbf\xe0`j2\x05X\xc5\xbfu\x91y^\xfeh\xde\xbf\xfaxVy%\xdf\xd7\xbf\x85yV\xc2\x89\xc6\xc1\xbf\x08\xfdK\x92\x96-\xbf?\xb4\xf7m\xaar\xf1\xd3\xbf\x0f,\x98\xfa\'\xba\xc8\xbf\xf3{\x7fxq[\xc6\xbfz\xf9\x80\xa8\xc6\xcb\xe3\xbf\x85\xfd|A\xc2}\xb3?\x17\xcc\x19Z6i\xd6\xbf)V\x8c\xb7\x0b\x01\xdf\xbf\xad\x96"7\'z\xdd\xbfC|\x90\xe9\xbb\xd7\xc8\xbf\xa9\xaf$\xc4_\x1a\xd9\xbf\x86|\xa9}\r\xcb\xdb\xbf\xc7\xb3\xfeq\x07r\xd0\xbfm\x7fpL\x17X\xa5\xbfs\xd8&\xd3\x99>\xdf\xbf\xae\x86\xaa`x\x14\xcc\xbf\xd7d\xe8/v\x0e\xdc\xbfd\xaf\xef\x8b]\xef\xd4\xbfJ\xb3\xfd\xcd\xadn\xc3\xbf?\xeeKb\xa8+\xcc\xbf\xab\x80\xc4\xca\xfc<\xe3\xbfx\xca\xa3\rt\x14\xdc\xbf\xa3U=D\xc9`\xd9\xbf7\xe4}Ws+\xd4\xbf\x17q\x9fJ\xe7f\x97\xbfL\x1bSvX\xdf\xc9\xbf\x87g2s\xbao\xcc\xbf\x99\xca\x9fn`\x11\xd9\xbf\xd5\xe6_"\x06\x83\xaf\xbfl\xfe\xb59\xeb\x05\xdc\xbf0\xaf\xa8\xc3\xacl\xd3\xbffI\xf0!\xe4\xa5\xc5\xbf\x8d\xb3\xc6\xb42\xe8\xe0\xbf!3Y\xb1\xa9\x9e\xc7\xbfB\xd4\xaa\xe1\xd5\x1a\xe2\xbf\x1b\xcda\xca\xe2\x08\xcc\xbf\xf9\x07\xb4\x88\xd5\x98\xd2\xbf7\x07\x00\x8d\x87\x83\xd3\xbf\xf6|\xd7\xb2\x84\x91\xe4\xbf1\x96\xc5H<\x80\x92\xbf\x0f\xc4\x90\xb9y\xe2\xe3\xbf%\xdd\xb2\xa6S]\xd4\xbf\x90[\xe3\xe0\xb3K\xe4\xbf\xcc\n\xb7\x94\xd9\x9c\xc8\xbf\xe3-1\xedQ\xd6\xe0\xbf _\x1d\xd8\xf8\xff\xd7\xbf\xec\x9344&B\xb7\xbfk\xa6\xc9\xbb\x16\xa3\x8b?%\xbd\xb1\xd2\xa9\x02\xe2\xbf^\x13Z\x07\xb1\xa0>?#\x01\x97r>\xf2\xda\xbf\x13\xd5\x16Q]\x9b\xe3\xbf]\xaa\x1f;\n\xb8\xd9\xbf \xe2\xbc\xb3S^\xdf\xbf\xaa\xf5r\x0f\x12\xb2\xc6\xbfw\xb2\xc1\xf8\xcb\\\xe0\xbf7%2\x19\xfc\xe1\xe1\xbfWM\xe1\xe1\xca\x8d\x98\xbf\xd3w\x86\\\xaa\x85\xd1\xbf\xd2\xf7n\xe6/\xdd\xe1\xbf\xc0=\xfa\xda\xc6\x82\xd6\xbf\x83\xde\x9b\xf1rO\xc2\xbf\x7f\x0c:\xe0\xbc\x17\xe1\xbfu\xd9\x07G\x82\x8f\xdf\xbf\xd7\xa9\xe8M\x91\xd1\xc6\xbf@h\x08o\xc4*\xd8\xbf;\x8f\xeei;W\xaa\xbf\x8d\xdfC}\x84K\xcf\xbfB\xb8\xe9c\xf9\xc0\xd7\xbf8\xe71\\\xe6\xd8\xc8\xbf\x08\x0e"P\xe1\x94\xce\xbf\x08V\x1b\xd7D\xd8\xd4\xbf\x81Z#\x83\xac}\xc9\xbfk\xb25aiP\xe5\xbf\xfe\xfck\xcc\x93?\xc8\xbf\xc6A\tu\xa7-\xe2\xbf\xd6X\xc6M\xf3\xdc\xb5?\xd3u\xd7A\x89\xcb\xd1\xbf\xcbrN\x0c\xf0\xf2\xdf\xbf\xc6 8+8\xd0\xb9\xbf\x87\x81\xdd\xcb\x99-\xaa\xbf\\\xd7!\xd3%r\xcf\xbf\x17\x14\xb2\x15\xf4\xd0\xe0\xbf\xec\xd9\xfc\xac\xb3\xa1\xd7\xbf\xb9)\nR\xa9\x9e\xd7\xbfj\x93Z\xa2\x06A\xe0\xbf\xc8\x85i\x98\x05N\xc2\xbf\x18\xc8\xc9G\nt\xd5\xbf\xf5\xa9\x01\x0e\x1f\x1f\xe1\xbf\x9b\x85\xdb_\xcf\x90\xa7\xbf\xd68\xf1\xe0n\x88\x95\xbf9 \x02cD\r\xdb\xbf\xcavP)\xdb/\xda\xbf\xebm\x06\xd44J\xd2\xbf\xcf_\xca)\xb7V\xda\xbf\xba\xd4)\x19\x18\x9d\xcc\xbf\xaf\xb2\x88r0m\xe2\xbf5I\xcbavi\xc9\xbfqy\x92\x0ce\x97\xd0\xbf\xcc\xce\xe5\x0e},\xde\xbf\x7f\x93\x17\x1d}\x19\xaf\xbf\xd4\x085cT*d\xbf\x90\xebb\xeb\x12\xac\xe0\xbfa\x195]6j\xdb\xbf\xc44\xe7\xe5%\xb1\xb0?\xe0\\\xde\xef\x9a\x95\xdc\xbf\xa7)\xd1N\x98:\xd0\xbfGXO\xd8]\x86\xe0\xbf\xcc.\x9d\xe7\xfd\x18\xdc\xbf\xa5{at\xe3\x1f}?c\x1f\x1a\xba\xb7\xac\xe2\xbf\xb6\x8cH{\xbc\xe2\xd7\xbf\xc0\xb9i\xec\xc2:\xc8\xbf\xc0\x8d\x91u\xdc\xa3\xdb\xbf{\xaa\xc6dJT\xc1?\xbft\xda\x07\xc9\xf6\xd2\xbf\xa3\xb8\x90y\x1b!\xcd\xbf\xfb\xa0U\xa8\xff-\xd8\xbfx\x9c\x180\xc8\x0b\xd7\xbf\xb6S\x92<\xf8\x1d\xd8\xbf#\x0b\xa6\xbc\xfc\x99\xdd\xbf\\\xb0\x1b\xe1(&\xd4\xbf%\x85\x96_?\x15\xd6\xbf\xa4\x98\xc6\x05C\xf7\xda\xbfs\xaa\xa8\xaf\x8fk\xd7\xbf\xd5\xb8\xbe?J\x05\xd3\xbf1\x00U^\xbcr\xe3\xbfj\xdc\x1eI\xe3\xa6\xe3\xbfE\xb7\x1f\xab\xfd\xd8\xdc\xbf\x84\xbd\xcajJ\xc2\xb3\xbfV}\xeb\xe2VA\xc8?\x9evAW\xce\xc1\xdc\xbf`f6t\x9a\xe2\xda\xbfk\'\x1a\x03\xc9\xc0\xd1\xbf\xaa>T\x92\x86\xa7\xc1?\x86CJX\xe4j\xad?\x81\x84}~\xb5\x93\xd4\xbf~\xd6Np)0\xd7\xbf\x03\xc9BI\x83\x03\xcf\xbfRx\xa9d\xf1\x11\xd7\xbf\x8cnSF\xb0\xa6\xe3\xbf_\xaf$\xd1\xdb\x90\xe1\xbf\x15\xd4\xb2u\xd0\x0c\xd0?\xea\xbe\x1e\xd59N\xd5\xbf\x1am\x83\x10\x8fo\xe2\xbfG_N\xc1;\xa3\xde\xbf`\x8bA\x17\x91\xa9\xd9\xbf\xa5\xe6\\\x13\x96\xec\xcd\xbf\x01c\xb9\x14~J\xde\xbf\xf3\x8f\xa0e\xc7`\xcd\xbf\x8e\xda\xe3\x01\xd6~\xd8\xbf\x05)\xc5\x9e\x0c6\xe3\xbf\xe9\xbf\x19\xe2e\xf4\xd6\xbf\xfa\x9d)\xf1\xd5p\xcc?\xf8\x98:\x08\x9f\xcc\xe0\xbfl\x8a\xe1\x0e\xc1\xa1\xd8\xbf\xa74\xa3=\xf5}\xdb\xbfm\x837\xccV\x8f\xd9?c(\xcf{\x9eO\xce\xbf\xeaP\xa8\xbb?\x9c\x9f\xbf\x08\xe7R\x8fJ\x0e\xb3?|6\xf8\x90C\x14\xe6\xbf-\xae\r\xafSQ\xb5?\xc4\xe4P\xbee\x08\xe7\xbf`\xa7\xf5\x15\x97t\xe2\xbf/9]\x01[Y\xc1\xbf\x1a\x1d\xa1|\\\xb4\xc9\xbf\xb2e\xbe\xa35.\xe6?\xbe\xa3\x8dH\xa8\xf7\xb4\xbf\x18^)1\xeb,\xdf\xbf\x0f\x14\xff\x96h\xd2\xe0\xbf^\xd4\x0b\xd1\xfa\x17\xc6\xbf\x93ck\xbc\x93q\xaa\xbf;u\xf38!\x0f\xd9\xbf\x8e\x19\xf2O\xe2D\xe5\xbf{\xf9\x98\x075\xf1\xb6??\xe3\xd6\xf3e\x01\xaf\xbfb\x07\x90\x99g\x9e\xe0\xbf\x04\x81\xc6\x80l\xde\xdb\xbf?\x91\x0e\xce}\x9a\xbf\xbf\x8fEW/X\x80\xda?\xfd\xa8/\x05sD\xd7\xbf\x890K\x9b\x0f\x94\xde\xbfUFE\xe0R5\xd5\xbf\xe8deB\xd2c\xde\xbf\xba\xbfJ\x0b\xce\xae\xe2\xbf\x9513?kh\xed\xbf\xaf\xa8T9\xc5\x08\xe2?\x1e\xe2\xe5\x01|\xcb\xb1\xbf\n\xe0[n<\x8f\xde\xbf\xb3\xc4\x80a\xa9\x10\xe3\xbf\xe6\xbf\x8d\xdf\xc4\xa5\x9e?\xd0\xba\xe4\x93\xdd\x89\xd0\xbf=\x81\xf5*\xd4\\\xe4?f\x1cY\x17c\xc4\xc8\xbf\x8e`\xf4\xf9\'W\xdc\xbf\xb6H\x00\xcfZ\xa5\xd5\xbf#\x82p\x92\xff\x9c\xcb\xbf\xbe\xf6\xae\x1eW\xe6\xc5\xbfylxP2G\xcd\xbf{\x91\r\xael\xf3\x95?\xffaC\x9f\xf8{\xe7\xbf{\x0b=N\xd7\x8e\xbd\xbf\x10\xa5\xbbv\xe3E\xe8\xbf\xa5\xea\x8e\xf0\x0b\x17\xd1\xbf\x1e\xf5\xd4\xe28\x7f\x99\xbf?"\xd4E\xf6)\xe5\xbf\xc92\xa1\xb7L\x80\xdc\xbf\xe5W\x8e\x83\xfc"\x93\xbfM\xc1\x8a\xa5\xf8\xeb\xd8\xbfu\xe5qjt\x1f\xd2?\xa78\xf8\xe6\xa0\xa6\xe9\xbf}\x03E\x0b\xd6\xa1\xe0\xbf\xd3\xbe#qx\x0b\xe6?\xf3\x04A\x01\xe6\xb8\xe1\xbf\xb71\r3\x92\xf9\xcd?L&\xdd\x81\xf7\xb5\xdb\xbf\xf81\xd0\x99\x9f\xcc\xe4\xbf\r.i\x9e\xb37\xe3\xbfi\xa8\xe3\xd4\x99\xaa\xe6\xbf\xd6\x824\x95\xcd\xc8\xc8?\xe6K\xc0\x0e\x1c\xf2\xe2\xbf\xd6\xd08`\xab\xa0\xd5\xbfQ\xb1;\xcc\xb2V\xb9\xbf\xfa\x90\xcb~c\xdf\xb6?\xdfiyu}\x19\xd8\xbf\x1aS\x17\xf4\x154\x9b\xbflF0\x94\x13b\xd6?XI\xe0\xe7K\xdc\xbe?\x8c\xd4\xba\x06\xce\x12\xc5\xbf\x8e\x80\x1f\xc0\xb05\xd1?\x19\xdf\xe93\xf1J\xbb?\x1c$\x8a\xe0\x1fX\xa9?\x9f\x95hz\x85\xf7\xe2\xbf\xf3]\xd9\x1dW\xb6\xa0?\xc7y^o6\x92\xb8?\x98lC\x98?\xd1\xc8\xbfIS\x98\xc4-\x19\xe9\xbf\x10\xfcOp\xfdb\xab\xbf\x0b\x87\x1b\x11\xc5\x7f\xb0\xbf\xd2\x7f\xe7\x02\\\x94\xbd?\x0bL\x0f\xd7;\xc3\xcb?\x93\xc3\xc6\xfb\x90\\\x8f\xbf\x8c\x19^%\xf8W\xd5?\xfc\t\x11"\xa9\x00\xd8\xbfy\x97\xdd\x0c\x94\xb5\xe1\xbf\x9b\x14U\n\x94\x0e\xd9\xbf-cd\x16\xde\xb8\xb7\xbf\xe0\x0bY\xef1\x1d\xc9\xbfQ\xf2\x0e\x0f\x9c\xab\xe1\xbf\xe2\xb8531\xed\xea\xbf\r\x0f\xd8F\xa7\t\xcc\xbf\xbd\xb0\xde\xa1\xce]\xe3\xbf\xa1\xa2t)\x88F\xd5\xbf?\x9a\xd7\xb2%\x8e\xc1\xbf\t\x12\x8c[\x02\xfc\xa0?\xff}{\xc1du\xb8?\xbb\x9b\x1a\xab\x9e\xc4\xbd?,Q\xf1|\xe2A\xd2?\x91\xbd\x8cW6\xa6\xcb\xbf@\xc6\x1eN:K\xe6\xbf\xe6}\x88o\xc6\x10\xbb?\x1e\x18}\xf8+r\xd8\xbf\xb7\xd8\xb6\xcf`\x85\xe0\xbf\x99\xdc\x99\x05t\xb8\xd5\xbf\xdbr\xec\xa0\x03A\xa9\xbfW\x9fA\xf0>\xc7\xe4\xbfm\xe8(g\xf8n\xe3\xbf<\xe4CY#\xd5\xb6\xbf>[\xb7\x99\x84\\\xe8\xbf\x06\x07\xdaBS\xd7\xe4\xbf\x1f\x8c\x90s\x9c;\xc5\xbf\xc1<\x1e\xa1\xda\xb1\xe8\xbf\x9a*\xe2r\xbd\xbf\x8c\xbfq\xf9\xff\xd5~\x98\xd7?\xf7\xcf+;iq\xd8\xbf{\xb87f\x9a\xdc\xe2\xbf_\xebz\xda \x0b\xe0\xbf\\^\xa1\xc5\xddb\x87?\x1fUo\xf1\x8c^\xe5\xbf\x0c\xbeA/Yn\xd7\xbf\xc5r\xceS\xc0\xf5\xd8?\x8f\xee\x0e\r\xb5\xb7\xd6\xbf\xd6S7\x96\x04\xe0\xe6\xbf\x0cdYJ\\5\xd8\xbf\xf9\xc9A\x10Sw\xdb\xbf\xa1i\x83\xefp\xf0\xc1\xbf\xd0tO\x82M\x18\xe3\xbf\x8a\x0e_Y\xb4o\xd5\xbf\xe7B\\b\xc3}\xcd\xbf\xbcW\x96/\xe1\x9f\xda\xbfBz\x1b\xa6\xbe\xa0\xd2\xbfcF\xc7Q\xc9\xf2\xe1\xbf\x83\xb3G\xf5\x9bY\xb9\xbft\xefF\x86\x0e\x02\xe9\xbf69>\x86Q\x02\xa5?\xcb\xb1\x9c\xe6#\xbb\xe8\xbf8\x0fs\x80\xa7\x02\xd2\xbf\xe5_\xeel"N\xe5\xbf\x92\xde7I/\xa4\xc0\xbf\xc4\xd0\x1d\x8a{\xe1\xc6\xbf(`v;v\xa3\xd6\xbf\xc7\x10^\xe7\xdc\xcd\xd2\xbf\xc9\xe2j\xb7}>\xc1?iY\xf5\xd0\x15\x84\xdc\xbf`8l<\x95f\xc6?\xa2Q\xaa\xc0\x9e\x9a\xae\xbf(\x0cI\x11l(\xc9\xbf\xa0=O\xc7\xa3i\xd4\xbf\x89\xdf\x86\x18\xe0\xa4\xda\xbf\x18\xd8\xc68Ww\xd4\xbf\xcb\x90\xdb>\xf2\xdd\xb5\xbflw\x83\x1axg\xe1\xbfu\xd0\xff\x9c\t\x16\xdd?(\x9d?m\x9aL\xb2?\xba>\x87\xaf\x02<\xe2\xbf\xda\x84\x02\x96\x89\x94\xe0\xbf\x91\xa5a\xcf\xbd\xb3\xc9\xbfVE\xf5\x81Q\xaa\xd6\xbfK--\xb5[d\xd0\xbfN\xa8\xbc\xf4\x8f\xf5\xd6\xbfMmB)A\xfe\xd3\xbf~\x04\xfb\x03\xef.\xd5?\xd1O_3\xed\x9b\xdf\xbf\xc1\xcc\x10\xc0-\xf0\xba\xbf\xab\xe5!}I5\xe1\xbf\xde)7\x8a\xeak\xdd\xbf\xc2\xeb\nL\x08\xb0\xe6\xbf\x8aFeC\xd8$\xde\xbf\x8b\x9f\xf5\x0fQ\xbc\xe0\xbf\x9bs5o \\\x8b\xbfm\xe8\xc4\x87\x109\xe5\xbf5\xcc\x1e|\xa4B\xd3\xbf#\xcds\x03\xc7\xb4\xae\xbf\xe12\xf2\xf7j\x17\xd3\xbfB\\b#\xed\xcd\xd1\xbf\xc8b]NGY\xd0?\xb2\x1f9\xb4\x7f\x16\xc0\xbf\x82]\xd9\x87\xf7\xf6\xb2?\xdcS\xfd\xc8\xfb\x0c\xc9\xbf\xec\x16R\xe9H\xa5\xe0\xbfz\xfd\x9b\xc5\xe1\n\xd9\xbf\xfe\xd8\x86}\xfdG\xe2\xbf\x96G\xfd\xb5*(\xd1\xbf\x1fK\\\x05\xb4\x05\xe2\xbf \x9aHp\xe9\x0b\xbc\xbf}\x85Ou\xb7\x7f\xd5?\x89\xd0\x1bS1L\xe1\xbfOM\xcak\xf1N\xcc\xbf\xe0\xdev\xd7\xab\xa1\xd4\xbf\x82~\xcbx\x0c \xe8\xbf\xc5s\x8c\xe2\xbf\xd0\xe8\xbf\xb7\xa7\x13=A\x03\xe1\xbf=\xf0w\t\xa3\x96\x96?\xa5;.s;\x81\x96?\xc8\rs\xcd9i\xdc\xbf\x16\xcb\xd9 \x01|\xd4\xbf\x13\n\x05\xaa\xd9\x13\xd4\xbf\xd5\x12|:\xd3\x9d\xd3\xbf\xa6\x85,\x16t\xfa\xc9\xbft9\xabIT\xa5\xd4?\xa5e~w,\x8d\xda\xbf\xf13\xa82th\xa8?Z\x0f;x=u\xd4\xbf#\x850\t\xc0[\xcd\xbfo\xbfO\x17%\x8c\xa4\xbf\xdah\x14\x81!\x0e\xe1\xbfu\xb0\x82\xc4\xc9\x92\xb5?\xa2\x81\xc6\x154\xa4\xcd?o\x98\x98\xe8\xa1Q\xa3?\xea9\xaa\xadIm\xcb\xbf\xcc\x90XFv\xec\xd0\xbfi\xff\xfa\x97\xb8\xba\xe3\xbf\xd6\xfb\xfb3\x8b\xd6\x90\xbf\xf1\xd1\xe0upi\xe4\xbf\x07%\xf8B\xfce\xcf\xbfD\x1a+\xd0\xd1!\xc5\xbfb>\x18\x9f<\x10\xc3\xbf\xf2\xf59\xbb\xc4\xa0\xd9\xbf1HRY\xe9\xb9\xd7\xbf\xe1&\xc5\xb7\xdeU\xe1\xbf#p\xce\xe7\xa8\xcd\xc1\xbf\xa9c\xa9\xe5\x93d\xcd\xbf\x08\x1fd\xf8:\xbc\xe1\xbf\x8e\x9d\xf0\x8d\xe3!\xd6\xbfd\xd2g\xfaC^\xc6?\x181o\xc2\xf7\xe5\xd3?m\xfd>\x1d\t\x00\xcf\xbf\x1f/!\xc0\xa3\x8e\xd8\xbf$u \xe5xd\xb5\xbf_\xc1\xe1\xf7W\xee\xdc?`\x94,\xee\xc5[\xad?UR\x81ih\x18\xdd\xbf\xb1V\x862$\xe1\xe4\xbf\xce9}\xb0\xe7\xa2\xcb?v&\x90\xafe_\xbb\xbff\xb2\x8f\x0c\xb9\xea\xe4\xbf_\x1c[\xd9<\xa5\xd1\xbfu+\xb4j\xcf\xc1\xe0\xbf\xb8\xa4T\xb4U\x97\xd9\xbf\xad\xc0\x0e8$\r\xdf\xbf\x12g+Ey\x1d\xdb\xbf3\xcf\x01\x9eGl\xd8\xbf\x16\x8a\x08\x9d\xf3\x16\xd7\xbf\xeb\xc9\xec\xff\xbcf\xda\xbf\x85Y7t\xaeu\xe0\xbfX\xb1\x99\xeb\xe1\x1b\xc1\xbf\xaeT{F\xa9\xae\xe3\xbfq\xea\xb6\x9a\xb6\xe5\xd9\xbf\x91\x80\xf6\xdb\x98\x9a\xcf\xbf\xa2\xeasq\xd0\xd9\xdd\xbfG\x93l\xd5\x05,\xdf\xbf\x12\xe2Ai2%\xbd\xbf\x83\xa4\xae\xf5\x90\r\xa7\xbf\xa7\xf3x\x1aE\xb1\xc4\xbf\xdevpMDx\x95?U_\x17o\xce\xab\xd8\xbfN<\x1c\xdd\x88\xee\xd0\xbf\x99\xb4\xfd\x9d\xbae\xd3?X{\xa5 \x9b\x17\xdd\xbf\xe3\x1egYS\xd1\xc6\xbf\xbb\xfe\x1d\xe9\xd3j\xc8\xbf\xc1\x13\xe1gN\xf0\xd3\xbfA|#S$Z\xb2?U\x95\x89\\\x9bb\xb3?\xc0\xb7"\xc5F\xb7\xcd\xbf\xc9\xc3\xb7LV)\xd3\xbf&\x9e\x94\xcd+h\xb5?\xdbN\xa3J\x06\xa3\xb0?\xbd\xd9\x93\x0eq\xcd\xbe\xbf\x16\x18z<I\x8b\xd8\xbf_\x08\xd2y\x9e\xb5\xcd\xbf\xf5\xf8\xb0<M4\xda\xbf\xeb\x1f\x86\xbb\x93o\xcc\xbfLfKdv \xd1\xbf\xe1\x95\xd1\x85b1\x92\xbf\x97l\xa9o\xf7\xa1\xe3?/\xbay\x9ft\xa7\xd2?k\xb7\x82\xb5\xa4\xdc\xc1\xbf\xdc8\xde\xcf \x95\xcb?Li8\x01\xcam\xd3\xbf}&\x91c\xba\x14\xcf\xbf\xe2\xbce\xc2\x10\xc8\xe3\xbf$\xc52\xeb\x19k\xc3?\xda\xb6\xed_\xe0h]\xbf\xbd|\x10l\x1a\xe0\xdc\xbf\x84V\xa2\xd2\x07\xf4\xc3\xbf;\xa30ei2\xbf\xbfS|O\x02\x94\xa9\xd1\xbf\x18V\xa8\xbb\x08a\xc1\xbf7\x88v8\x94z\xc7?\x05N1\xd7"*\xb2\xbfL\xe4\xb8i=\xc4\xd3\xbfa(\x8c\xc7\x80/\xbc\xbf\xa8%\x04\xc4\xe8;\xc3\xbf\xac\xd5\xe7\xf9\x95k\xd1\xbf\xf2\x87\xad\xba\x83\x98\xc5?H,\xafC\\\xfe\xde\xbf\xe9$\xbaE\xe7\n\xaa\xbf\xca\xd1fA\x84/\xd4\xbf\xc4\x04\xe6\xda5\xf6\xdc\xbf\xfc\x9b\xfe\t\xeb\x1e\xd5?\x99\xcb\x0c|:\x0c\xe3\xbf\xf7\xfbV\xce\xec\x03x\xbf\x85\xf3`@\xc2\xd5\xa8?\xfe\xf2r\xa2\x9d\xfe\xe0\xbf+\xc3?\x80\xb9p\xdb?2\x03\xa6\x9a6\x7f\xd0\xbf\x93\xda%=9i\xcd\xbf*\xc2\x8cG\x14\xb8\xc3?\xde\xd4\xdb\x96\xa6\x9a\xc1\xbf\xaf\xb8\xe5\xa1\xa8\x96\xd7\xbf\xe8R\xc5/r#\xd0\xbf\xff3\xca\xc6\x06Q\xe4\xbf%\x88\xa2p\x0e\xe6\xdb\xbf\x11\xad\x08w\xea\xd7\xe3\xbf\xcc1O\x1b\x87\x83\xd2\xbf\xaa/\x91.D\x13\xd0\xbf\xe0\x9d\xeb\xc3\xf4\xed\xcb\xbf\x0e%\x89y@\x88\xc5?\x05\x99\xcar\x14C\xd6?{\xab]Y{\xb8\xcd\xbf\xdd\x84\x8eg }\xc7\xbf\xf0\n\x87\x0b9\xd3\xb0?:6\xd1\x90\xe9;\xd8\xbf\xc5C1.J;\xd2\xbf\x82L|\xf6\x8b\xb4\xa3?~\x81\xf0\x978\x96\xcf\xbf\xebn/\xea\xf9\x17\xd3\xbf\xd1HG\x10\x88\xbf\xd8\xbf\x9e^\xf0\xa1\x16\xe5\xd2\xbf\xbd\x91\xf0\xfb\x08O\xe1\xbf2\x14\xf3W\x88\xbd\xb6\xbf\xcaS\x13\xcf\xcf\x9d\xb4\xbf\xb6\r\x00{\xe1\xea\xd1?\x91K\x9f\tLX\x93?\x85\nAV$\x90\xd4\xbfa\x8a\xcfg\x01\x84\xb1?\xc2B\x8c\xbe=\t\xa6?\xa1\xb7\x02\xf1\x9b\xff\xa1\xbf\xceg\xcd\xed\xbbk\xb4\xbf]\xceH\xb1\x0e\xbd\xe0\xbf\x98\x1a\x14\x8f;s\xc0\xbf\x05\x8f\x85\x0c\xe4\xcd\x95?\x9d\x90\xc0/b\xb8\xc2\xbf\x01\xb5`\xc6-\xad\xca\xbf@\x0f%_\xc8\x8c\xe3\xbf\x9a\xac5\xb6\x07E\xe3\xbf\xdd\x921\x9c>\xbb\x97\xbf\xbc)\x00\xed@c\xbf\xbf\x84s<\xe7E\xef\xd1\xbf\xdaR\xefF\xe0\xcc\xcd?\xdfw\xdc65\xab\xb5\xbfz\x85w\xbc\x80D\xbf?\xe4wWu\r+\xd5\xbf\x98\\`\xce2\xe4\xae?\x7f"\xd8\x91\xbb\x83\xd7\xbf\x10\xff\x81F\xe0\xeb\xd5\xbf\x01\xa1\xf2"z:\xc7\xbfr\x00:\x80*}\xcf\xbf\x19I\xde\xa1\xf0m\xd1\xbf\x9c\x9f\x96$\xa0k\xb8\xbf\xca|\xa8\x1c\xc4x\xc8\xbf\xc0\x9b;\x84\xa3\xb9\xd6\xbf3j,{$6\xdb\xbf\xab\xd4\xa7..\x0f\xa6\xbf\xc5-F\x00\rD\xdf\xbf\x13S\x8f\xac\xe6S\xb4\xbf\xaa\x1d\x86\x9e*\x0b\xcf\xbf\'Ti\x99$R\xca\xbf\xfc8s\xe58\xf6\xd1\xbf>\xe6\xea\x9b\x8f\x8b\xd6\xbf\xe4\xc4\t\xca\xa3\x95\xd9\xbf*\x19\x0bz\xf9\x18\xda\xbfq\xed\x12\xd6F\xcc\xc3\xbf\xd4\x91\xbf\x86\xd4V\xe4\xbf=i,\x03\xeb\xf3\xca?\xfa7.\xcc\x84\x0e\xe9?tr\x1em{\xe5\xc0\xbfm \x9dq\xb9\x0f\xd7\xbfzG\x90\xb8"\x02\xcf\xbfcA\x052\xdf\x82\xdd\xbf\x18\x05G\xc78\x86\xd1\xbfq\x10\xf3\xd9\x80\x08\x9e?%#!bt\xfd\xe0\xbf\xfe\x06g.&0\xc6?\xef\xdd/\x12"\xb3\xd4\xbfj\xa2BF\xf5\xc5\xbc\xbfeq\xff\xb1~%\xd0\xbf\x88\xe4\x93\x80\xd5y\xac\xbfUK\xa0\xe8#\xb8\xd8\xbf\x8cT7\xdb\x91\x97\xa3?\x16\x1c\x11\x1d\x1fN\xdb\xbfH\xeb\x8c\xac@\x85\xb7\xbf\xa8P\xba\x96\x0bw\xd7\xbfn\x97s\x7fe8\xc4\xbfL%KK1\x05\xcd\xbf&O!@\r"\xe6\xbf\x9d4tP\x8f@\xe0\xbfQR\xb0\xb2\xd4<\xc9?\x18\nf\x86\xbe\xa7\xc2\xbf\x04\x9d\xd0"\xed\xf2\xb0\xbff \xb2\xd5\x124\xda\xbf\x17\nMc\x1f\xcb\xc4\xbf,\x1dI\xe6\xb1\xf8\xb5\xbf\xc3\xdb\x92\xf9\xc3\xfb\xd3\xbf\x92\xd5G\x04\xc6\x83\xbb\xbf\x11j\xc2\xf6\x87\x84\xd0?\xa3nB\x8b\x19J\xda\xbf\xcc\xf7\xc7Dq\xb8\xb0?\x01t\x12\xfa\x0c\xcd\xa8\xbf!Q\x83zV\xd4\xd9\xbf<Rx68B\xb8\xbf\xd1\xcf\xa0\xe3\xc8;\xda\xbf\xca\xb1V\x87\x95z\xd1\xbf\xcci_>%t\xd1\xbfW_\xa8\xbe\x14\xa9\xc3\xbf}M\xa0\x95C\xec\xa1\xbf\xafX\xeb][[\xba\xbfS<\xa9\xd7DQ\xda\xbf\xe2\xa7\x86\x88 \xa9\xb6\xbfL\x99\x04\xd0\x80\x8e\xba\xbf\x9e\xaa\x9e\xf2\x14\x9b\xe1\xbf\x89Zt`\xcd\x8e\xd3\xbf\xd0\xfd\xce\xb8\xa6S\xa7\xbf_\xebh\x19aK\xd7\xbf\xe1\x8a\x19\x9d\x9cQ\xd0\xbf\xcd\x83\x9e\xd8\xcb\xa5\xd7\xbf\xb6\x04\xcf\xe7T\x1c\xb0?\xa2\x81\xf9\xb3\xce_\xc1\xbf#U\xe4\xcc\xfa\xc4\xd9\xbfv\x80>\x1an6\xa8?O\x150\xc8\xda\x01\xd4\xbf\xd7\x18~eA\xa3\xcc\xbf\xab\x19\xac-B\xa3\xd7\xbf\x9b\x99\xd2\xcc^y\xb5\xbf\x0c*(\xee\x0e\xab\xc2\xbf\x037\x86\xda\x14\xab\xc3\xbf\x1e\xe95\xd4`\xdd\xd6\xbf\xf6N\xf6\xa2\xfc\xef\xc6\xbf\xaf\xc8v\xcf\x9e\xa7\xc8\xbf\x97\xd8\x93\x12\x97\xdb\xb6?\x0b\xb7\xe4\xa7\x7ft\xc4\xbf\xae\x01\r\x04G\xdb\xd4\xbf\xb0\xb8\xb9\x80\xd5e\xe2\xbf\xdf\xec\x93\xa7\xf0\xf1\xa6\xbfOL\xa2"&\xd2\xa7?\x0c1\xfeI\xe4/\xdb\xbf\xecQ\x9adr\xbe\xdd\xbfGg\n5j\xe6\xd9?p\x00\xfa\x07\x8f\x93\xab?\xdb\x98\xc2\x98\xffM\xd6\xbf\x8a*K\xe2\xeb\xdf\xc1?#\xa8\x9b$&\xcc\xc9\xbf\x80H\xf3\x9e\xd6H\xc2\xbfB[\xbe\x12\xd0e\xca\xbf\x1a\xa0\x90,\xef\xaa\xca\xbf+\xa2\x87p\x18\x1f\xce\xbf\xb4\xad_\xb9D\x80\xb6\xbf[u\x12\xcb\xc1k\xb8\xbf\x8f\xd8p@\xbb\xe3\xd2\xbf(\xb1\x0fC\x19\x10\xa1?\xe64Qr\xb6\xfa\xd2\xbf\xe3C\xae\xad\xe5y\xaf\xbf\xa1\x02\xa2?\'V\xd0\xbfh\x90.w\x08N\xd4\xbf\xd3\xad\xaag\xc5F\xcb\xbf^\x1f\xf3\x97\xc7$\xbb\xbf\xc9\xf5e\xb8\x13\x07\xa3\xbf\x19\xf3\xd8>\xdeP\xd4\xbf\xaf2\xf1\xa8\xe9[\xae\xbf\x1e\x9e\x81\x1dV\x1a\xd7\xbf\x1b\x84\xd4\xcad\xae\xc3\xbf~\x0c\xab\'\xe6I\xd0\xbfVb>S\xa9\x9e\xdd\xbf\xc0\x03k2\x90\xc6\xbd\xbf\xa1\xd3$\x0e\xe7\xb0\x8c\xbf\x9b\x84"n\xea\xfa\xb6?\xc6\x94\x8e\xdc\xbb\xa4\xd0\xbf\x8e\x14\x1cI\x05.\xe1\xbfh\x91\xb7@\xe3Y\xc3\xbf\xb8exN\xdb4\x92\xbf_\xb6;\x94<c\xc6?\xf9\xda%\xc5\xc7\x8a\xd2\xbfF\x163f;\x89\xd2\xbf\xc5E\xbc\xdb\xe0)\xca\xbf\x12\xdaj:A~\xa1?\xb8*\xde\x14&)\xd6\xbf)\x18f\x7f<\x98\xa9?\xffj\xdb\xbb\x9eT\xd2\xbfL{\x99%\x95\xe5\xcb\xbfJ,\xea\xeb\xbb\x14\xc5\xbf\xdb=\n\xfc_\xd6\xda\xbf\xcb\x83.\xa1\xa1$\xcd\xbf\xef\x14C\x9a]\x8b\xd5\xbf\x95\xfa\x8c\x1c\x1e\x98\x89\xbfzn}"f\xd2\xd0\xbfw*\xee\xb0e\xe2\xd3\xbfT0\x1e\\\x8e<\xc6\xbfE\xb6?\xd3\xf6\x1e\xc4\xbfC\xf1\xec\xc3\xa3"\xc3\xbfV\xe4\xe9TM\x1b\xd2\xbfA\xbb9:&\xde\xc6\xbf81\xba\xde{4\xe1\xbf\x04P\xa1`\x06\xda\xea\xbf;Z\xa8\x13h\x8d\xc0\xbf\xd8\x1d>\xa86\xe2\xde\xbf-\x92g\x8a\x902\xc9\xbf\xbb\xf1\x9e\xeb\xc9-\xe0\xbf\x0e\x08J$\x82\xd9\xe0\xbfo\x18\xde\x19\xbe\x94\xd8\xbf_\x1a\x8e\xbd\x1ch\xe0\xbf\xea\xe17\x847J\xd9\xbfp\x81\x99\x8c\x07\x9d\xdb\xbf\xaa\x16\xb0\xe1\x96\xd0\xe1\xbf\xf5\xa0\x84\xc2\x83O\xb4\xbf\xdb\x92@\xfaC\xfa\xe5\xbf]\xa4+\xee\x12\x07\xe3\xbf-\xa0\t6\x15\x87\xc2\xbf\x8c\x17\x8b`\xe7"\xab\xbf\x98\x80\xdc\xbc\xdb@\xc7?\x1a\xa7@O\xfc\x08\xe4\xbf\xff\xde\x97\xabb\xba\xe8\xbf&dv\xdd*\xde\xe2\xbf\x17\x08\xc6\xeb\x1b\xc6\xcd\xbf2|\'(\x1d\xd6\xea\xbfe-\xc9\xfaZ]\xc1\xbf\t\xf1e\xa8<_\xd4\xbf\x05b6\x9c\x84\x8f\xc3?\xd2|\xeb\x0f\xcc\x86\xb3\xbfe\x8c\xed\xbd\xc7\x00\xdc\xbfM!\xe1>\x18R\xde\xbf@<\xa9G.\x05\xde\xbf\xaa\xdc\xd2\xbe\x03\xfd\xdc\xbf>\xcc\xed/\x98;\xe1\xbfA&*\x96\xd2\xb1\xe0\xbfL\xb7=h\xef\x9f\xd3\xbf\xd6G\xb4\xc2!I\xe4\xbf-\xe55\xdd\xa6\xd9\xe3\xbf\xee\x92\xdd\xf3\x16\x18\xda\xbfY\xe3\x0f\x8b\x07G\xd4\xbf\x0c\xf3>\xef\x0f\x03\xe2\xbf\x96\xcf\xb9\xb9\x13\\\xe8\xbf\xbdS\x8c\xe4^\xe7\xe0\xbf\x9f\x9e.a\xad\xc0\xe2\xbfs`B\xd2\x7f\x0c\xc0\xbf\xb7\xf3b\x1fJ\x13\xcd\xbf\xc3\xe7\x01\xf5cf\xe0\xbf\x17\x8cE\x08\xba\xea\xc7\xbfV-\'\x89q\xeb\xe1\xbfE\x8cC\xebl\x06\xe5\xbf0/H\xfdY\x14\xde\xbf\x85\xcf"\x00\x18\xfe\xd8\xbf\x98\xc5\xf9;\xe3_\xdd\xbf\xd9\x02h\x00\xd1\xcf\xd8\xbf\x85<~8!p\xe1\xbfe\xe7a*\xb7\x84t?\xbfh3\x81\xa6\xd8\xe1\xbf\xf4\x9eDU\xf2\xe2\xe2\xbf\x07J\xd4w]K\xe3\xbf\x89\x1a8\xf9%\x9a\xe0\xbfiA\x10\xb3p\xf3\xd0?\xcc#H\x88\xab\x93\xdd\xbf5\xd1\x11\xad\xa3\x13\xe8\xbf-\xd0\xd5~\xef\x1f\xe8\xbf\x7f3\xd6\xf5\x973\xb3?H\xe4\x9dh\xd4\xed\xe7\xbf\x9e-\xc0\xb9\xe1L\xc8\xbf\xaecs\xa0\xad\xc9\xd2\xbf\xd4\xcb\x8f6\x1d\x89\xc8\xbf\xc0\xc0\xd0\x12w\x9a\xe2\xbf\xbf\xea9\x89\xe9|\xe0\xbf\x9e\x99!t\x0b\xde\x92?\xc2V\x0b\x0b\xd5\x9a\xe3\xbf\xae\x10\xc8*E,\xea\xbf\xa0\x1a\xcd\xfb65\xe5\xbfo\xf54\xbc\xb1M\xd0\xbfmX{\xc8\x19\x87\xe7\xbf\x1f[r\x1b\x11\x18\xb8\xbf\x00\xe2\xc6Vk\x93\xac\xbf\xb0\xb9\xa8s\'w\x89\xbf\\\xabh#\x05?\xe3\xbf\x19\x06i\xd5\xe9\x06h?v\t\xdf\xa9\xbb\xf6\xdc\xbf\x0c\xd4\xb8M\xd7\xe9\xde\xbf1\x17\xf5\x1b\x7f\x97\xe8\xbfr\xaa2(*\x04\xd9\xbf7\xd6\x95o\xb0\xf3\xba?\xcc+\xa9\x8d\xdfJ\xdf\xbfK~\x19\xbc\xfc\xb9\xe0\xbf\x18\xbfz\x8d\xa08\xdd\xbf\xa0)\xe3\xb2c\x7f\xd9\xbf\xd5YgL\xa2"\xd5\xbf{\'`\x0e(\x07\xaf?(\xfb\xdf\xb3\x18b\xb3\xbf\xa1\x8a\xf0\xa4>Z\xdd\xbfi\xb5a}Q\xe5\xd8\xbf\xa0\xd0W?\xd8\x19\xce?_\nh\xd6\xc6\xcf\xb0?\xda\xd4\\FxA\xe0\xbfS\xec1P\xd3@\xe4\xbf0M.\xb7\x08/\xe6\xbf\xdf,\xcd\xbaO,\xe1\xbf\xb4\x88\xc1\xa5\xac\xce\xcb?U\xe7\x88\xa2\x89y\xe2\xbf\xa9\x9a4\x16\xbe?\xe8\xbf<\x12Q\xa6\x7f\xfd\xe2\xbf\x9e\xf0+G\x84-\xdb\xbfa+z\xfd\x17\xf7\xe0\xbf\x915\x0b-\xa5\xea\xe0\xbf\x91\x9f\x81Q\x9f\x80\xc0\xbf\x0b\x0f=\xe2\x10-\xe7\xbf\xcc\ro\xb3"\xa8\xe1\xbf&l\xff\x00#\xd9\x84?\x91\x17}w\xb7\'\xdd\xbfs\x9e\x84\x9b<K\xe9\xbf\xe6\x90S\xd0\x19\xc4\xd4\xbf\x8d\x11\x8ax\xe5\x8c\xd2\xbf\xd1\x88N\xce\xd1\x9c\xe7\xbf\xe4\x02*s\xa8\xc1\xda\xbf\xfb\x93h\x89A\x93\xa0?\x1bs]\x8fYU\xc3\xbf\xfc\xda\xf5s\x13#\x9b\xbf\\\xf6\xf1f\x1a\x8c\xd8\xbf\x8e\xd73\xacq\n\xe1\xbf\x80\x133\xa8^\xf9\xe3\xbfG\xb8\xb8\xb3\x96^\xd0\xbfOh\x1f9\xd4+\xda\xbfT\x10\xce\xc1\x85s\xe9\xbfsH\x11\x06p\x16\xd3\xbfT\x9e*\xf5Nb\xe0\xbf\x95\x15\x961\x84(\xe1\xbf\x12\xff\x92\xf1\x1b$E?\x97wB\x16\xf4\xff\xb3\xbf\xda=\'?\xca\xee\xda\xbfj\x18k<\xee\x06\xe7\xbf~\x1a^\xb9/u\xd1\xbf\xeb\x8eM\xedLC\xe2\xbf\xbd\xde\rk\x1a\x03\xc6\xbf\xff\x93\xb8x*\x8a\xe0\xbf0\xda\xa6\xa4\xe1\xaf\xdb\xbf\x97\x854\xf6\xb4|\x97\xbf,`\xc9\xf8\'\xee\xdf\xbf\x97\xf4ozu\x1a\xd2\xbf\xf5\x8a\x8f\xdd\xe3{\xe0\xbf\xf2\x87"\x8eaQ\xe1\xbf<\xfax\xf1\xca\xc6\xd4\xbf$\xad\xc3\xb9!\r\xe3\xbf\x7f\x14\xc8pQr\xe1\xbf\xe3\xdc\xc8\xff\x10"\xd7\xbf\x1d\xd5\x1eh\xe5\xfa\xd4\xbf`3\xf6a\x81\x7f\xc9\xbf\xea;D\x14\xe9\xca\xe7\xbf\xb6Le!\xe0\xf7\xab?\xe7g\xf9\xfc\x8d\xdd\xc2\xbf\xe6xoPu\xeb\xca\xbf\xf7\x15\x86U\x9d\xb1\xe8\xbfJ\x1e\xbfCI\t\xda\xbf6.I\xc6\xc9\xed\xce\xbf\xfc\x85}\xd5\xb3\xb2\xe3\xbf6~\xc5\xba\x05\xa2\xe9\xbf\xfb\xf2\x91\x82J\xdb\xe7\xbf\xad$\x1f\xff\x900\xd2\xbf\x95O\xc3\xcfP\x9e\xe7\xbf\'\xf6\x91\xdc\x91I\xe2\xbf 0\x13\xa42\x9c\xd6\xbfs\x84\xfd\x18\x9b\xd5\xda\xbfY\xb2yL\xde\xbf\xda\xbf\xfb\x862\x12\xd1k\xe9\xbf\xe0\t\xc0\xe9)(\xd2?\x9aU\x8a\xd2]s\xda\xbf\xac\xec\x88\x85\x86\xc0\xc9\xbf\xbf\xe3\xd8y\xfa\xc2\xc8\xbf(%9\xbep\xf1\xe5\xbf\xcf\xe1R0ny\xdd\xbf\xcb#ek\x9f\xf4\xde\xbf\xfb f/\xe4\x92\xe3\xbf\xdf\xeb\xd05\'P\xe9\xbf\x8f.2\x03\xe3[\xcd\xbf\xbf\xa0\xbd\xec\x152\xe0\xbf\ta\xe9\x89 \xbf\xe7\xbf\x81\xd6\x9f\x90\x84\xa3\xe1\xbf\x85(j\xa6\x9a[\xe1\xbf\xabs-\x01xu\xda\xbf\xd3\xe2\xe2k\xb8\xb8\xe0?^y\x88w-Z\xdf\xbf1\xf6\xa0&\xf4@\xd5\xbf\xfb"\x17\x02~\x91\xd7\xbf\xcc\x1d"\x05\x83\xd3\x9e?\xa2\x98\xdd\x8c?Z\xd2\xbf\xc8\xd4&\xf8v\x05\xe0\xbfF\x9a\x89\x9b*F\xe4\xbf\xe0\xb2\x162\x80G\xe7\xbf\x95\x8e;\xc4\xfb\xa5\xe6\xbf\xc9|\x8c\x18N\xcb\xe1\xbf\xa8\x96\x7f\x0f\xb1\xda\xe6\xbf,\xcdJo<\xe4\xe1\xbf\x85e*\x14JP\xe0\xbf;L\xe5\x0e\x0b\xef\xa9\xbf\'\xcd\x0e\xc4\xabb\xe8\xbf0&b9\xb3\xd8\xc5\xbf\xbc\xc9g\x82\xf9%\xec\xbfR\xfa?}\xac\xc7\xdb\xbf\xb8\x02R6q\xa3\xe7\xbf[\xc6s>\x85\x02\xe8\xbf\x19\x0b\xba\xab\xc3\xef\xcc\xbf\xcfmV\xbb\xa1u\xda\xbf;\n\x84\xe4u\x1b\xec\xbf\xe4\x98l\xb8\x15\xc3\xe2\xbfyM\xd3\xe6F\x0f\xb4\xbf\xb5\xc2\xf16|]\xe2\xbfd\xd3\xb9\xcb\xa5\xa4\xde\xbf2\xf6\xdb\xe9\x12g\xd3\xbf\x0f\xb4`\xac|\xda\xe2\xbf\x89\x1b\x0b\x9c\xeeW\xe2\xbf\x04\x1c\r\xbcWx\xe6\xbf\xf7\x1c\x9a\xba\x8d\xe8\xe6\xbf\x80\x18.\xf6\xf4\x87\xc5\xbfK.!\xee)\x88\xe8\xbf<\x00\xd2\xcc\xdaF\xe5\xbf\xc8\xdb6\x02\x91\xe2\xd2\xbf\x9889hpm\xce\xbf\x1f\xd5\xd5\x9f45\xca\xbf$\xa6\x88|0\xa9\xe4\xbf\x87\xea?$\xaa6\xc4\xbf\xaf\x8b\x92\\w\xa7\xb9\xbfR]\nY\xb7\x0f\xe0\xbf^h\x16\xfet\xbc\xe2\xbf\xd2\xb0~\xac\xd0\xc3\xe4\xbfK\x11[\x05(\xac\xd3\xbf\x00\xfa}\xa6\xb2\xc1\xb0\xbfB\xec\t[\xa0\x1e\xeb\xbf3\xfe\xc1T\xe2\x96\xe5\xbfh\x1fm|\xdcQ\xe8\xbf\xc9\xf9\x03\x947\xdc\xdc\xbf|\xa7\xd7C\x12.\xd9\xbf\x19\xd46\x94\xbe\xf0\xe3\xbf\x90\xfe\xa0\xf0X!\xbb\xbf\xf9\x1fl\x13j\x84\xa2?N\x90\x9b\x02\xe6!\xb3\xbf4\x84\xbev\xd3"\xe4\xbf\x9c~#2\x86\x13\xd6\xbf|\x05\xb4\xaar\xab\xd4\xbf\xc6\xba\n!\x01\x99\xb6?&\xb9\x97\xbb\x80v\xa7?\x912\x14\xa0U\xac\xdb\xbf\xffq\xcdN|\x9c\xe3\xbf\xed\xe7\xdbn\xda \xe5\xbf\x1eX\xd0\x92\xda\x97\xe5\xbf\xb8\x16\xbe\x1fv\x86\xe4\xbf\x81\xcfx\xb4\xf9\xae\xc1?\x8e\x063s2]\xe2\xbf\xb9\x92\xd18\x05\xf3\xe9\xbf\xaf\xbd\x96\x88\xf0=\xdc\xbfW\x9e\xc6\xb3S\xc3\xe6\xbfg\x07)\x0c\xd9\xfd\xe4\xbff\x911\\d\xf7\xe5\xbfx\x8d\x0cX\x98\xf5\xe6\xbf\xc7^\xe1\xf5\xbeG\xdd\xbf\x18\xa9\xe7h\xb7\x13\xe5\xbf'
p39
tp40
bag2
(g3
(I0
tp41
g5
tp42
Rp43
(I1
(I20
I256
tp44
g12
I00
[truncated: 3,893,204 more chars]
