# Supplementary material for: How biological attention mechanisms improve task performance in a large-scale visual system model
Source: eLife journal article supplement (doi:10.7554/elife.38105), 2018-10-01
Supplement: supp [file elife-38105-supp-v1.zip › elife_poa_e38105_Figure_3_source_data_1.txt]

(lp0
(lp1
cnumpy.core.multiarray
_reconstruct
p2
(cnumpy
ndarray
p3
(I0
tp4
S'b'
p5
tp6
Rp7
(I1
(I2
I20
I13
I27
tp8
cnumpy
dtype
p9
(S'f8'
p10
I0
I1
tp11
Rp12
(I3
S'<'
p13
NNNI-1
I-1
I0
tp14
bI00
S'\x93_,\xf9\xc5\x92\xdf?\xde\xdd\xdd\xdd\xdd\xdd\xdd?\xb8\x1e\x85\xebQ\xb8\xde?\xb8\x1e\x85\xebQ\xb8\xde?\xb8\x1e\x85\xebQ\xb8\xde?\xb8\x1e\x85\xebQ\xb8\xde?\xde\xdd\xdd\xdd\xdd\xdd\xdd?\xde\xdd\xdd\xdd\xdd\xdd\xdd?\x03\x9d6\xd0i\x03\xdd?\x03\x9d6\xd0i\x03\xdd?)\\\x8f\xc2\xf5(\xdc?)\\\x8f\xc2\xf5(\xdc?)\\\x8f\xc2\xf5(\xdc?t\xda@\xa7\rt\xda?\x9a\x99\x99\x99\x99\x99\xd9?\xbfX\xf2\x8b%\xbf\xd8?\xbfX\xf2\x8b%\xbf\xd8?\xbfX\xf2\x8b%\xbf\xd8?\xe5\x17K~\xb1\xe4\xd7?{\x14\xaeG\xe1z\xd4?{\x14\xaeG\xe1z\xd4?{\x14\xaeG\xe1z\xd4?\xa0\xd3\x06:m\xa0\xd3?\xc6\x92_,\xf9\xc5\xd2?\x11\x11\x11\x11\x11\x11\xd1?\x11\x11\x11\x11\x11\x11\xd1?7\xd0i\x03\x9d6\xd0?\x93_,\xf9\xc5\x92\xdf?\x93_,\xf9\xc5\x92\xdf?\xb8\x1e\x85\xebQ\xb8\xde?\xb8\x1e\x85\xebQ\xb8\xde?\xb8\x1e\x85\xebQ\xb8\xde?O\x1b\xe8\xb4\x81N\xdb?O\x1b\xe8\xb4\x81N\xdb?O\x1b\xe8\xb4\x81N\xdb?t\xda@\xa7\rt\xda?t\xda@\xa7\rt\xda?t\xda@\xa7\rt\xda?\x9a\x99\x99\x99\x99\x99\xd9?\xe5\x17K~\xb1\xe4\xd7?\n\xd7\xa3p=\n\xd7?0\x96\xfcb\xc9/\xd6?0\x96\xfcb\xc9/\xd6?{\x14\xaeG\xe1z\xd4?{\x14\xaeG\xe1z\xd4?\xa0\xd3\x06:m\xa0\xd3?\xa0\xd3\x06:m\xa0\xd3?\xa0\xd3\x06:m\xa0\xd3?\xa0\xd3\x06:m\xa0\xd3?\xecQ\xb8\x1e\x85\xeb\xd1?\xecQ\xb8\x1e\x85\xeb\xd1?\x11\x11\x11\x11\x11\x11\xd1?7\xd0i\x03\x9d6\xd0?7\xd0i\x03\x9d6\xd0?\x93_,\xf9\xc5\x92\xdf?7\xd0i\x03\x9d6\xe0?7\xd0i\x03\x9d6\xe0?\x93_,\xf9\xc5\x92\xdf?\x93_,\xf9\xc5\x92\xdf?\xde\xdd\xdd\xdd\xdd\xdd\xdd?\xde\xdd\xdd\xdd\xdd\xdd\xdd?t\xda@\xa7\rt\xda?\xbfX\xf2\x8b%\xbf\xd8?\xe5\x17K~\xb1\xe4\xd7?UUUUUU\xd5?0\x96\xfcb\xc9/\xd6?{\x14\xaeG\xe1z\xd4?\xecQ\xb8\x1e\x85\xeb\xd1?\xecQ\xb8\x1e\x85\xeb\xd1?\x11\x11\x11\x11\x11\x11\xd1?\xb8\x1e\x85\xebQ\xb8\xce?\x03\x9d6\xd0i\x03\xcd?\x9a\x99\x99\x99\x99\x99\xc9?\x9a\x99\x99\x99\x99\x99\xc9?\x9a\x99\x99\x99\x99\x99\xc9?\xe5\x17K~\xb1\xe4\xc7?\x9a\x99\x99\x99\x99\x99\xc9?\xe5\x17K~\xb1\xe4\xc7?0\x96\xfcb\xc9/\xc6?0\x96\xfcb\xc9/\xc6?0\x96\xfcb\xc9/\xc6?\x93_,\xf9\xc5\x92\xdf?\xb8\x1e\x85\xebQ\xb8\xde?\xb8\x1e\x85\xebQ\xb8\xde?\x03\x9d6\xd0i\x03\xdd?\x03\x9d6\xd0i\x03\xdd?\x03\x9d6\xd0i\x03\xdd?O\x1b\xe8\xb4\x81N\xdb?O\x1b\xe8\xb4\x81N\xdb?\xbfX\xf2\x8b%\xbf\xd8?0\x96\xfcb\xc9/\xd6?{\x14\xaeG\xe1z\xd4?\xa0\xd3\x06:m\xa0\xd3?\x11\x11\x11\x11\x11\x11\xd1?\xb8\x1e\x85\xebQ\xb8\xce?\x9a\x99\x99\x99\x99\x99\xc9?\x9a\x99\x99\x99\x99\x99\xc9?\x9a\x99\x99\x99\x99\x99\xc9?\x9a\x99\x99\x99\x99\x99\xc9?\x9a\x99\x99\x99\x99\x99\xc9?\x9a\x99\x99\x99\x99\x99\xc9?\x03\x9d6\xd0i\x03\xcd?\xb8\x1e\x85\xebQ\xb8\xce?\xb8\x1e\x85\xebQ\xb8\xce?\xb8\x1e\x85\xebQ\xb8\xce?\xb8\x1e\x85\xebQ\xb8\xce?\xb8\x1e\x85\xebQ\xb8\xce?\xa0\xd3\x06:m\xa0\xd3?\x93_,\xf9\xc5\x92\xdf?\xa4p=\n\xd7\xa3\xe0?7\xd0i\x03\x9d6\xe0?\xb8\x1e\x85\xebQ\xb8\xde?\xb8\x1e\x85\xebQ\xb8\xde?\xde\xdd\xdd\xdd\xdd\xdd\xdd?\x03\x9d6\xd0i\x03\xdd?)\\\x8f\xc2\xf5(\xdc?)\\\x8f\xc2\xf5(\xdc?t\xda@\xa7\rt\xda?\x9a\x99\x99\x99\x99\x99\xd9?\xe5\x17K~\xb1\xe4\xd7?\xc6\x92_,\xf9\xc5\xd2?\xecQ\xb8\x1e\x85\xeb\xd1?\xecQ\xb8\x1e\x85\xeb\xd1?\xecQ\xb8\x1e\x85\xeb\xd1?\x11\x11\x11\x11\x11\x11\xd1?7\xd0i\x03\x9d6\xd0?7\xd0i\x03\x9d6\xd0?\xb8\x1e\x85\xebQ\xb8\xce?\x03\x9d6\xd0i\x03\xcd?\x03\x9d6\xd0i\x03\xcd?O\x1b\xe8\xb4\x81N\xcb?O\x1b\xe8\xb4\x81N\xcb?O\x1b\xe8\xb4\x81N\xcb?\x9a\x99\x99\x99\x99\x99\xc9?\x9a\x99\x99\x99\x99\x99\xc9?\x93_,\xf9\xc5\x92\xdf?\x93_,\xf9\xc5\x92\xdf?7\xd0i\x03\x9d6\xe0?7\xd0i\x03\x9d6\xe0?\xb8\x1e\x85\xebQ\xb8\xde?\xb8\x1e\x85\xebQ\xb8\xde?\xde\xdd\xdd\xdd\xdd\xdd\xdd?\x03\x9d6\xd0i\x03\xdd?O\x1b\xe8\xb4\x81N\xdb?)\\\x8f\xc2\xf5(\xdc?)\\\x8f\xc2\xf5(\xdc?\x9a\x99\x99\x99\x99\x99\xd9?\xe5\x17K~\xb1\xe4\xd7?\n\xd7\xa3p=\n\xd7?UUUUUU\xd5?\xc6\x92_,\xf9\xc5\xd2?\x11\x11\x11\x11\x11\x11\xd1?\x03\x9d6\xd0i\x03\xcd?\x03\x9d6\xd0i\x03\xcd?\x9a\x99\x99\x99\x99\x99\xc9?\xe5\x17K~\xb1\xe4\xc7?0\x96\xfcb\xc9/\xc6?{\x14\xaeG\xe1z\xc4?\xc6\x92_,\xf9\xc5\xc2?\xc6\x92_,\xf9\xc5\xc2?\xc6\x92_,\xf9\xc5\xc2?\xb8\x1e\x85\xebQ\xb8\xbe?\x93_,\xf9\xc5\x92\xdf?\x11\x11\x11\x11\x11\x11\xe1?\x11\x11\x11\x11\x11\x11\xe1?7\xd0i\x03\x9d6\xe0?\xb8\x1e\x85\xebQ\xb8\xde?\x93_,\xf9\xc5\x92\xdf?\xa4p=\n\xd7\xa3\xe0?\x11\x11\x11\x11\x11\x11\xe1?\x11\x11\x11\x11\x11\x11\xe1?\x11\x11\x11\x11\x11\x11\xe1?\xa4p=\n\xd7\xa3\xe0?7\xd0i\x03\x9d6\xe0?\xb8\x1e\x85\xebQ\xb8\xde?\xde\xdd\xdd\xdd\xdd\xdd\xdd?\x93_,\xf9\xc5\x92\xdf?7\xd0i\x03\x9d6\xe0?\x03\x9d6\xd0i\x03\xdd?\x03\x9d6\xd0i\x03\xdd?)\\\x8f\xc2\xf5(\xdc?O\x1b\xe8\xb4\x81N\xdb?t\xda@\xa7\rt\xda?\x9a\x99\x99\x99\x99\x99\xd9?\x9a\x99\x99\x99\x99\x99\xd9?\xbfX\xf2\x8b%\xbf\xd8?\n\xd7\xa3p=\n\xd7?\n\xd7\xa3p=\n\xd7?\n\xd7\xa3p=\n\xd7?\x93_,\xf9\xc5\x92\xdf?\x11\x11\x11\x11\x11\x11\xe1?\x11\x11\x11\x11\x11\x11\xe1?\xa4p=\n\xd7\xa3\xe0?\xa4p=\n\xd7\xa3\xe0?\x11\x11\x11\x11\x11\x11\xe1?~\xb1\xe4\x17K~\xe1?Y\xf2\x8b%\xbfX\xe2?333333\xe3?\xa0\xd3\x06:m\xa0\xe3?\x0et\xda@\xa7\r\xe4?\x0et\xda@\xa7\r\xe4?\xa0\xd3\x06:m\xa0\xe3?\xe8\xb4\x81N\x1b\xe8\xe4?UUUUUU\xe5?\xc3\xf5(\\\x8f\xc2\xe5?0\x96\xfcb\xc9/\xe6?\x9d6\xd0i\x03\x9d\xe6?\n\xd7\xa3p=\n\xe7?\xe5\x17K~\xb1\xe4\xe7?\xe5\x17K~\xb1\xe4\xe7?\xe5\x17K~\xb1\xe4\xe7?wwwwww\xe7?\n\xd7\xa3p=\n\xe7?\n\xd7\xa3p=\n\xe7?0\x96\xfcb\xc9/\xe6?UUUUUU\xe5?\x93_,\xf9\xc5\x92\xdf?\x11\x11\x11\x11\x11\x11\xe1?\x11\x11\x11\x11\x11\x11\xe1?~\xb1\xe4\x17K~\xe1?Y\xf2\x8b%\xbfX\xe2?Y\xf2\x8b%\xbfX\xe2?\xe8\xb4\x81N\x1b\xe8\xe4?0\x96\xfcb\xc9/\xe6?\x9d6\xd0i\x03\x9d\xe6?wwwwww\xe7?,\xf9\xc5\x92_,\xe9?\x9a\x99\x99\x99\x99\x99\xe9?t\xda@\xa7\rt\xea?)\\\x8f\xc2\xf5(\xec?\x96\xfcb\xc9/\x96\xec?\x03\x9d6\xd0i\x03\xed?\xde\xdd\xdd\xdd\xdd\xdd\xed?\xb8\x1e\x85\xebQ\xb8\xee?\xb8\x1e\x85\xebQ\xb8\xee?\xb8\x1e\x85\xebQ\xb8\xee?\xb8\x1e\x85\xebQ\xb8\xee?\x93_,\xf9\xc5\x92\xef?\x93_,\xf9\xc5\x92\xef?\x00\x00\x00\x00\x00\x00\xf0?\x00\x00\x00\x00\x00\x00\xf0?\x00\x00\x00\x00\x00\x00\xf0?\x00\x00\x00\x00\x00\x00\xf0?\x93_,\xf9\xc5\x92\xdf?\x11\x11\x11\x11\x11\x11\xe1?~\xb1\xe4\x17K~\xe1?\x0et\xda@\xa7\r\xe4?\x9d6\xd0i\x03\x9d\xe6?\xe5\x17K~\xb1\xe4\xe7?\xbfX\xf2\x8b%\xbf\xe8?\x07:m\xa0\xd3\x06\xea?O\x1b\xe8\xb4\x81N\xeb?O\x1b\xe8\xb4\x81N\xeb?)\\\x8f\xc2\xf5(\xec?\x03\x9d6\xd0i\x03\xed?\xde\xdd\xdd\xdd\xdd\xdd\xed?&\xbfX\xf2\x8b%\xef?\x93_,\xf9\xc5\x92\xef?\x00\x00\x00\x00\x00\x00\xf0?\x00\x00\x00\x00\x00\x00\xf0?\x00\x00\x00\x00\x00\x00\xf0?\x00\x00\x00\x00\x00\x00\xf0?\x00\x00\x00\x00\x00\x00\xf0?\x00\x00\x00\x00\x00\x00\xf0?\x00\x00\x00\x00\x00\x00\xf0?\x00\x00\x00\x00\x00\x00\xf0?\x00\x00\x00\x00\x00\x00\xf0?\x00\x00\x00\x00\x00\x00\xf0?\x00\x00\x00\x00\x00\x00\xf0?\x00\x00\x00\x00\x00\x00\xf0?\x93_,\xf9\xc5\x92\xdf?\x11\x11\x11\x11\x11\x11\xe1?\xc6\x92_,\xf9\xc5\xe2?\xa0\xd3\x06:m\xa0\xe3?\xe8\xb4\x81N\x1b\xe8\xe4?0\x96\xfcb\xc9/\xe6?\x07:m\xa0\xd3\x06\xea?t\xda@\xa7\rt\xea?O\x1b\xe8\xb4\x81N\xeb?)\\\x8f\xc2\xf5(\xec?\xde\xdd\xdd\xdd\xdd\xdd\xed?\xb8\x1e\x85\xebQ\xb8\xee?\x00\x00\x00\x00\x00\x00\xf0?\x00\x00\x00\x00\x00\x00\xf0?\x00\x00\x00\x00\x00\x00\xf0?\x00\x00\x00\x00\x00\x00\xf0?\x00\x00\x00\x00\x00\x00\xf0?\x00\x00\x00\x00\x00\x00\xf0?\x00\x00\x00\x00\x00\x00\xf0?\x00\x00\x00\x00\x00\x00\xf0?\x00\x00\x00\x00\x00\x00\xf0?\x00\x00\x00\x00\x00\x00\xf0?\x00\x00\x00\x00\x00\x00\xf0?\x00\x00\x00\x00\x00\x00\xf0?\x00\x00\x00\x00\x00\x00\xf0?\x00\x00\x00\x00\x00\x00\xf0?\x00\x00\x00\x00\x00\x00\xf0?\x93_,\xf9\xc5\x92\xdf?~\xb1\xe4\x17K~\xe1?\xa0\xd3\x06:m\xa0\xe3?0\x96\xfcb\xc9/\xe6?\x9a\x99\x99\x99\x99\x99\xe9?\xe1z\x14\xaeG\xe1\xea?\x96\xfcb\xc9/\x96\xec?q=\n\xd7\xa3p\xed?\xde\xdd\xdd\xdd\xdd\xdd\xed?&\xbfX\xf2\x8b%\xef?\x93_,\xf9\xc5\x92\xef?\x00\x00\x00\x00\x00\x00\xf0?\x00\x00\x00\x00\x00\x00\xf0?\x00\x00\x00\x00\x00\x00\xf0?\x00\x00\x00\x00\x00\x00\xf0?\x00\x00\x00\x00\x00\x00\xf0?\x00\x00\x00\x00\x00\x00\xf0?\x00\x00\x00\x00\x00\x00\xf0?\x00\x00\x00\x00\x00\x00\xf0?\x00\x00\x00\x00\x00\x00\xf0?\x00\x00\x00\x00\x00\x00\xf0?\x00\x00\x00\x00\x00\x00\xf0?\x00\x00\x00\x00\x00\x00\xf0?\x00\x00\x00\x00\x00\x00\xf0?\x00\x00\x00\x00\x00\x00\xf0?\x00\x00\x00\x00\x00\x00\xf0?\x00\x00\x00\x00\x00\x00\xf0?\x93_,\xf9\xc5\x92\xdf?\xecQ\xb8\x1e\x85\xeb\xe1?\xa0\xd3\x06:m\xa0\xe3?0\x96\xfcb\xc9/\xe6?,\xf9\xc5\x92_,\xe9?\x9a\x99\x99\x99\x99\x99\xe9?t\xda@\xa7\rt\xea?\xe1z\x14\xaeG\xe1\xea?)\\\x8f\xc2\xf5(\xec?\xb8\x1e\x85\xebQ\xb8\xee?&\xbfX\xf2\x8b%\xef?\x93_,\xf9\xc5\x92\xef?\x93_,\xf9\xc5\x92\xef?\x93_,\xf9\xc5\x92\xef?\x00\x00\x00\x00\x00\x00\xf0?\x00\x00\x00\x00\x00\x00\xf0?\x00\x00\x00\x00\x00\x00\xf0?\x00\x00\x00\x00\x00\x00\xf0?\x00\x00\x00\x00\x00\x00\xf0?\x00\x00\x00\x00\x00\x00\xf0?\x00\x00\x00\x00\x00\x00\xf0?\x00\x00\x00\x00\x00\x00\xf0?\x00\x00\x00\x00\x00\x00\xf0?\x00\x00\x00\x00\x00\x00\xf0?\x00\x00\x00\x00\x00\x00\xf0?\x00\x00\x00\x00\x00\x00\xf0?\x00\x00\x00\x00\x00\x00\xf0?\xa4p=\n\xd7\xa3\xe0?\x93_,\xf9\xc5\x92\xdf?\xde\xdd\xdd\xdd\xdd\xdd\xdd?\x03\x9d6\xd0i\x03\xdd?)\\\x8f\xc2\xf5(\xdc?O\x1b\xe8\xb4\x81N\xdb?\xbfX\xf2\x8b%\xbf\xd8?UUUUUU\xd5?\xa0\xd3\x06:m\xa0\xd3?7\xd0i\x03\x9d6\xd0?\x03\x9d6\xd0i\x03\xcd?0\x96\xfcb\xc9/\xc6?\xb8\x1e\x85\xebQ\xb8\xbe?{\x14\xaeG\xe1z\xb4?\x11\x11\x11\x11\x11\x11\xb1?{\x14\xaeG\xe1z\xa4?{\x14\xaeG\xe1z\xa4?{\x14\xaeG\xe1z\xa4?O\x1b\xe8\xb4\x81N\x8b?O\x1b\xe8\xb4\x81N\x8b?O\x1b\xe8\xb4\x81N\x8b?O\x1b\xe8\xb4\x81N\x8b?O\x1b\xe8\xb4\x81N\x8b?O\x1b\xe8\xb4\x81N\x8b?O\x1b\xe8\xb4\x81N\x8b?O\x1b\xe8\xb4\x81N\x8b?O\x1b\xe8\xb4\x81N\x8b?\xa4p=\n\xd7\xa3\xe0?7\xd0i\x03\x9d6\xe0?\xde\xdd\xdd\xdd\xdd\xdd\xdd?\xb8\x1e\x85\xebQ\xb8\xde?\x03\x9d6\xd0i\x03\xdd?\x9a\x99\x99\x99\x99\x99\xd9?\n\xd7\xa3p=\n\xd7?{\x14\xaeG\xe1z\xd4?7\xd0i\x03\x9d6\xd0?0\x96\xfcb\xc9/\xc6?\xb8\x1e\x85\xebQ\xb8\xbe?{\x14\xaeG\xe1z\xa4?O\x1b\xe8\xb4\x81N\x9b?O\x1b\xe8\xb4\x81N\x9b?O\x1b\xe8\xb4\x81N\x9b?O\x1b\xe8\xb4\x81N\x9b?\x00\x00\x00\x00\x00\x00\x00\x00\x00\x00\x00\x00\x00\x00\x00\x00\x00\x00\x00\x00\x00\x00\x00\x00\x00\x00\x00\x00\x00\x00\x00\x00\x00\x00\x00\x00\x00\x00\x00\x00\x00\x00\x00\x00\x00\x00\x00\x00\x00\x00\x00\x00\x00\x00\x00\x00\x00\x00\x00\x00\x00\x00\x00\x00\x00\x00\x00\x00\x00\x00\x00\x00\x00\x00\x00\x00\x00\x00\x00\x00\x00\x00\x00\x00\x00\x00\x00\x00\xa4p=\n\xd7\xa3\xe0?7\xd0i\x03\x9d6\xe0?\xde\xdd\xdd\xdd\xdd\xdd\xdd?\xb8\x1e\x85\xebQ\xb8\xde?\xde\xdd\xdd\xdd\xdd\xdd\xdd?O\x1b\xe8\xb4\x81N\xdb?\x9a\x99\x99\x99\x99\x99\xd9?\x9a\x99\x99\x99\x99\x99\xd9?\n\xd7\xa3p=\n\xd7?\xecQ\xb8\x1e\x85\xeb\xd1?\xe5\x17K~\xb1\xe4\xc7?O\x1b\xe8\xb4\x81N\x9b?O\x1b\xe8\xb4\x81N\x8b?\x00\x00\x00\x00\x00\x00\x00\x00\x00\x00\x00\x00\x00\x00\x00\x00\x00\x00\x00\x00\x00\x00\x00\x00\x00\x00\x00\x00\x00\x00\x00\x00\x00\x00\x00\x00\x00\x00\x00\x00\x00\x00\x00\x00\x00\x00\x00\x00\x00\x00\x00\x00\x00\x00\x00\x00\x00\x00\x00\x00\x00\x00\x00\x00\x00\x00\x00\x00\x00\x00\x00\x00\x00\x00\x00\x00\x00\x00\x00\x00\x00\x00\x00\x00\x00\x00\x00\x00\x00\x00\x00\x00\x00\x00\x00\x00\x00\x00\x00\x00\x00\x00\x00\x00\x00\x00\x00\x00\x00\x00\x00\x00\xa4p=\n\xd7\xa3\xe0?\xa4p=\n\xd7\xa3\xe0?\xa4p=\n\xd7\xa3\xe0?7\xd0i\x03\x9d6\xe0?\x93_,\xf9\xc5\x92\xdf?\xb8\x1e\x85\xebQ\xb8\xde?t\xda@\xa7\rt\xda?\xc6\x92_,\xf9\xc5\xc2?O\x1b\xe8\xb4\x81N\x8b?O\x1b\xe8\xb4\x81N\x8b?\x00\x00\x00\x00\x00\x00\x00\x00\x00\x00\x00\x00\x00\x00\x00\x00\x00\x00\x00\x00\x00\x00\x00\x00\x00\x00\x00\x00\x00\x00\x00\x00\x00\x00\x00\x00\x00\x00\x00\x00\x00\x00\x00\x00\x00\x00\x00\x00\x00\x00\x00\x00\x00\x00\x00\x00\x00\x00\x00\x00\x00\x00\x00\x00\x00\x00\x00\x00\x00\x00\x00\x00\x00\x00\x00\x00\x00\x00\x00\x00\x00\x00\x00\x00\x00\x00\x00\x00\x00\x00\x00\x00\x00\x00\x00\x00\x00\x00\x00\x00\x00\x00\x00\x00\x00\x00\x00\x00\x00\x00\x00\x00\x00\x00\x00\x00\x00\x00\x00\x00\x00\x00\x00\x00\x00\x00\x00\x00\x00\x00\x00\x00\x00\x00\x00\x00\xa4p=\n\xd7\xa3\xe0?7\xd0i\x03\x9d6\xe0?7\xd0i\x03\x9d6\xe0?\x11\x11\x11\x11\x11\x11\xe1?~\xb1\xe4\x17K~\xe1?\x11\x11\x11\x11\x11\x11\xe1?\x03\x9d6\xd0i\x03\xdd?t\xda@\xa7\rt\xda?0\x96\xfcb\xc9/\xd6?\xecQ\xb8\x1e\x85\xeb\xd1?\xe5\x17K~\xb1\xe4\xc7?\xb8\x1e\x85\xebQ\xb8\xbe?O\x1b\xe8\xb4\x81N\xab?O\x1b\xe8\xb4\x81N\xab?\x00\x00\x00\x00\x00\x00\x00\x00\x00\x00\x00\x00\x00\x00\x00\x00\x00\x00\x00\x00\x00\x00\x00\x00\x00\x00\x00\x00\x00\x00\x00\x00\x00\x00\x00\x00\x00\x00\x00\x00\x00\x00\x00\x00\x00\x00\x00\x00\x00\x00\x00\x00\x00\x00\x00\x00\x00\x00\x00\x00\x00\x00\x00\x00\x00\x00\x00\x00\x00\x00\x00\x00\x00\x00\x00\x00\x00\x00\x00\x00\x00\x00\x00\x00\x00\x00\x00\x00\x00\x00\x00\x00\x00\x00\x00\x00\x00\x00\x00\x00\x00\x00\x00\x00\xa4p=\n\xd7\xa3\xe0?\xa4p=\n\xd7\xa3\xe0?~\xb1\xe4\x17K~\xe1?\xecQ\xb8\x1e\x85\xeb\xe1?~\xb1\xe4\x17K~\xe1?\xecQ\xb8\x1e\x85\xeb\xe1?\xecQ\xb8\x1e\x85\xeb\xe1?\xb8\x1e\x85\xebQ\xb8\xde?O\x1b\xe8\xb4\x81N\xdb?\n\xd7\xa3p=\n\xd7?O\x1b\xe8\xb4\x81N\xcb?{\x14\xaeG\xe1z\xc4?{\x14\xaeG\xe1z\xa4?\x00\x00\x00\x00\x00\x00\x00\x00\x00\x00\x00\x00\x00\x00\x00\x00\x00\x00\x00\x00\x00\x00\x00\x00\x00\x00\x00\x00\x00\x00\x00\x00\x00\x00\x00\x00\x00\x00\x00\x00\x00\x00\x00\x00\x00\x00\x00\x00\x00\x00\x00\x00\x00\x00\x00\x00\x00\x00\x00\x00\x00\x00\x00\x00\x00\x00\x00\x00\x00\x00\x00\x00\x00\x00\x00\x00\x00\x00\x00\x00\x00\x00\x00\x00\x00\x00\x00\x00\x00\x00\x00\x00\x00\x00\x00\x00\x00\x00\x00\x00\x00\x00\x00\x00\x00\x00\x00\x00\x00\x00\x00\x00\xa4p=\n\xd7\xa3\xe0?\xa4p=\n\xd7\xa3\xe0?\xecQ\xb8\x1e\x85\xeb\xe1?\xecQ\xb8\x1e\x85\xeb\xe1?~\xb1\xe4\x17K~\xe1?\xa4p=\n\xd7\xa3\xe0?\x93_,\xf9\xc5\x92\xdf?)\\\x8f\xc2\xf5(\xdc?O\x1b\xe8\xb4\x81N\xcb?\x11\x11\x11\x11\x11\x11\xb1?O\x1b\xe8\xb4\x81N\x9b?\x00\x00\x00\x00\x00\x00\x00\x00\x00\x00\x00\x00\x00\x00\x00\x00\x00\x00\x00\x00\x00\x00\x00\x00O\x1b\xe8\xb4\x81N\x8b?O\x1b\xe8\xb4\x81N\x8b?O\x1b\xe8\xb4\x81N\x8b?{\x14\xaeG\xe1z\xa4?{\x14\xaeG\xe1z\xa4?{\x14\xaeG\xe1z\xa4?{\x14\xaeG\xe1z\xa4?{\x14\xaeG\xe1z\xa4?O\x1b\xe8\xb4\x81N\xab?O\x1b\xe8\xb4\x81N\xab?O\x1b\xe8\xb4\x81N\xab?\x11\x11\x11\x11\x11\x11\xb1?{\x14\xaeG\xe1z\xb4?\xa4p=\n\xd7\xa3\xe0?\x11\x11\x11\x11\x11\x11\xe1?\xecQ\xb8\x1e\x85\xeb\xe1?\xecQ\xb8\x1e\x85\xeb\xe1?Y\xf2\x8b%\xbfX\xe2?\xecQ\xb8\x1e\x85\xeb\xe1?~\xb1\xe4\x17K~\xe1?\xa4p=\n\xd7\xa3\xe0?\xb8\x1e\x85\xebQ\xb8\xde?\x03\x9d6\xd0i\x03\xdd?UUUUUU\xd5?\x11\x11\x11\x11\x11\x11\xd1?O\x1b\xe8\xb4\x81N\xcb?\x11\x11\x11\x11\x11\x11\xb1?\x11\x11\x11\x11\x11\x11\xb1?O\x1b\xe8\xb4\x81N\xab?O\x1b\xe8\xb4\x81N\x8b?\x00\x00\x00\x00\x00\x00\x00\x00\x00\x00\x00\x00\x00\x00\x00\x00\x00\x00\x00\x00\x00\x00\x00\x00\x00\x00\x00\x00\x00\x00\x00\x00\x00\x00\x00\x00\x00\x00\x00\x00\x00\x00\x00\x00\x00\x00\x00\x00\x00\x00\x00\x00\x00\x00\x00\x00\x00\x00\x00\x00\x00\x00\x00\x00\x00\x00\x00\x00\x00\x00\x00\x00\x00\x00\x00\x00\x00\x00\x00\x00\xa4p=\n\xd7\xa3\xe0?\xecQ\xb8\x1e\x85\xeb\xe1?333333\xe3?\x0et\xda@\xa7\r\xe4?\x0et\xda@\xa7\r\xe4?\x0et\xda@\xa7\r\xe4?\x0et\xda@\xa7\r\xe4?333333\xe3?333333\xe3?~\xb1\xe4\x17K~\xe1?\x11\x11\x11\x11\x11\x11\xe1?\x93_,\xf9\xc5\x92\xdf?t\xda@\xa7\rt\xda?0\x96\xfcb\xc9/\xd6?\xc6\x92_,\xf9\xc5\xd2?\xb8\x1e\x85\xebQ\xb8\xce?O\x1b\xe8\xb4\x81N\xcb?\x9a\x99\x99\x99\x99\x99\xc9?{\x14\xaeG\xe1z\xc4?{\x14\xaeG\xe1z\xc4?\xc6\x92_,\xf9\xc5\xc2?\xc6\x92_,\xf9\xc5\xc2?\x11\x11\x11\x11\x11\x11\xc1?\xb8\x1e\x85\xebQ\xb8\xbe?\xb8\x1e\x85\xebQ\xb8\xbe?\xb8\x1e\x85\xebQ\xb8\xbe?O\x1b\xe8\xb4\x81N\xbb?\xa4p=\n\xd7\xa3\xe0?\xc6\x92_,\xf9\xc5\xe2?UUUUUU\xe5?\xc3\xf5(\\\x8f\xc2\xe5?\n\xd7\xa3p=\n\xe7?\x07:m\xa0\xd3\x06\xea?\xe1z\x14\xaeG\xe1\xea?q=\n\xd7\xa3p\xed?q=\n\xd7\xa3p\xed?\xde\xdd\xdd\xdd\xdd\xdd\xed?\xde\xdd\xdd\xdd\xdd\xdd\xed?\xde\xdd\xdd\xdd\xdd\xdd\xed?K~\xb1\xe4\x17K\xee?\xb8\x1e\x85\xebQ\xb8\xee?\xb8\x1e\x85\xebQ\xb8\xee?\xb8\x1e\x85\xebQ\xb8\xee?\xb8\x1e\x85\xebQ\xb8\xee?\xb8\x1e\x85\xebQ\xb8\xee?\xb8\x1e\x85\xebQ\xb8\xee?\xb8\x1e\x85\xebQ\xb8\xee?\xb8\x1e\x85\xebQ\xb8\xee?K~\xb1\xe4\x17K\xee?K~\xb1\xe4\x17K\xee?\xde\xdd\xdd\xdd\xdd\xdd\xed?\xde\xdd\xdd\xdd\xdd\xdd\xed?\xde\xdd\xdd\xdd\xdd\xdd\xed?\xde\xdd\xdd\xdd\xdd\xdd\xed?\xa4p=\n\xd7\xa3\xe0?\x0et\xda@\xa7\r\xe4?0\x96\xfcb\xc9/\xe6?wwwwww\xe7?,\xf9\xc5\x92_,\xe9?\xbc\xbb\xbb\xbb\xbb\xbb\xeb?)\\\x8f\xc2\xf5(\xec?q=\n\xd7\xa3p\xed?K~\xb1\xe4\x17K\xee?K~\xb1\xe4\x17K\xee?\xb8\x1e\x85\xebQ\xb8\xee?\xb8\x1e\x85\xebQ\xb8\xee?&\xbfX\xf2\x8b%\xef?&\xbfX\xf2\x8b%\xef?&\xbfX\xf2\x8b%\xef?\x00\x00\x00\x00\x00\x00\xf0?\x00\x00\x00\x00\x00\x00\xf0?\x00\x00\x00\x00\x00\x00\xf0?\x00\x00\x00\x00\x00\x00\xf0?\x00\x00\x00\x00\x00\x00\xf0?\x00\x00\x00\x00\x00\x00\xf0?\x00\x00\x00\x00\x00\x00\xf0?\x00\x00\x00\x00\x00\x00\xf0?\x00\x00\x00\x00\x00\x00\xf0?\x00\x00\x00\x00\x00\x00\xf0?\x00\x00\x00\x00\x00\x00\xf0?\x00\x00\x00\x00\x00\x00\xf0?\xa4p=\n\xd7\xa3\xe0?{\x14\xaeG\xe1z\xe4?\x9d6\xd0i\x03\x9d\xe6?\x9a\x99\x99\x99\x99\x99\xe9?\x96\xfcb\xc9/\x96\xec?q=\n\xd7\xa3p\xed?K~\xb1\xe4\x17K\xee?\xb8\x1e\x85\xebQ\xb8\xee?&\xbfX\xf2\x8b%\xef?\x00\x00\x00\x00\x00\x00\xf0?\x00\x00\x00\x00\x00\x00\xf0?\x00\x00\x00\x00\x00\x00\xf0?\x00\x00\x00\x00\x00\x00\xf0?\x00\x00\x00\x00\x00\x00\xf0?\x00\x00\x00\x00\x00\x00\xf0?\x00\x00\x00\x00\x00\x00\xf0?\x00\x00\x00\x00\x00\x00\xf0?\x00\x00\x00\x00\x00\x00\xf0?\x00\x00\x00\x00\x00\x00\xf0?\x00\x00\x00\x00\x00\x00\xf0?\x00\x00\x00\x00\x00\x00\xf0?\x00\x00\x00\x00\x00\x00\xf0?\x00\x00\x00\x00\x00\x00\xf0?\x00\x00\x00\x00\x00\x00\xf0?\x00\x00\x00\x00\x00\x00\xf0?\x00\x00\x00\x00\x00\x00\xf0?\x00\x00\x00\x00\x00\x00\xf0?\xa4p=\n\xd7\xa3\xe0?{\x14\xaeG\xe1z\xe4?\x9d6\xd0i\x03\x9d\xe6?\x9a\x99\x99\x99\x99\x99\xe9?\xe1z\x14\xaeG\xe1\xea?)\\\x8f\xc2\xf5(\xec?q=\n\xd7\xa3p\xed?\xde\xdd\xdd\xdd\xdd\xdd\xed?\xb8\x1e\x85\xebQ\xb8\xee?&\xbfX\xf2\x8b%\xef?&\xbfX\xf2\x8b%\xef?&\xbfX\xf2\x8b%\xef?&\xbfX\xf2\x8b%\xef?\x93_,\xf9\xc5\x92\xef?\x93_,\xf9\xc5\x92\xef?\x93_,\xf9\xc5\x92\xef?\x00\x00\x00\x00\x00\x00\xf0?\x00\x00\x00\x00\x00\x00\xf0?\x00\x00\x00\x00\x00\x00\xf0?\x00\x00\x00\x00\x00\x00\xf0?\x00\x00\x00\x00\x00\x00\xf0?\x00\x00\x00\x00\x00\x00\xf0?\x00\x00\x00\x00\x00\x00\xf0?\x00\x00\x00\x00\x00\x00\xf0?\x00\x00\x00\x00\x00\x00\xf0?\x00\x00\x00\x00\x00\x00\xf0?\x00\x00\x00\x00\x00\x00\xf0?O\x1b\xe8\xb4\x81N\xdb?)\\\x8f\xc2\xf5(\xdc?\x03\x9d6\xd0i\x03\xdd?\x03\x9d6\xd0i\x03\xdd?\xde\xdd\xdd\xdd\xdd\xdd\xdd?\xde\xdd\xdd\xdd\xdd\xdd\xdd?\xb8\x1e\x85\xebQ\xb8\xde?\x93_,\xf9\xc5\x92\xdf?\x93_,\xf9\xc5\x92\xdf?\xa4p=\n\xd7\xa3\xe0?\xa4p=\n\xd7\xa3\xe0?\x11\x11\x11\x11\x11\x11\xe1?\x11\x11\x11\x11\x11\x11\xe1?~\xb1\xe4\x17K~\xe1?~\xb1\xe4\x17K~\xe1?\xecQ\xb8\x1e\x85\xeb\xe1?\xecQ\xb8\x1e\x85\xeb\xe1?\xecQ\xb8\x1e\x85\xeb\xe1?Y\xf2\x8b%\xbfX\xe2?Y\xf2\x8b%\xbfX\xe2?Y\xf2\x8b%\xbfX\xe2?Y\xf2\x8b%\xbfX\xe2?Y\xf2\x8b%\xbfX\xe2?Y\xf2\x8b%\xbfX\xe2?Y\xf2\x8b%\xbfX\xe2?Y\xf2\x8b%\xbfX\xe2?Y\xf2\x8b%\xbfX\xe2?O\x1b\xe8\xb4\x81N\xdb?\x03\x9d6\xd0i\x03\xdd?\xde\xdd\xdd\xdd\xdd\xdd\xdd?\xde\xdd\xdd\xdd\xdd\xdd\xdd?\xb8\x1e\x85\xebQ\xb8\xde?7\xd0i\x03\x9d6\xe0?7\xd0i\x03\x9d6\xe0?7\xd0i\x03\x9d6\xe0?7\xd0i\x03\x9d6\xe0?7\xd0i\x03\x9d6\xe0?\xa4p=\n\xd7\xa3\xe0?\xa4p=\n\xd7\xa3\xe0?\xa4p=\n\xd7\xa3\xe0?\xa4p=\n\xd7\xa3\xe0?\xa4p=\n\xd7\xa3\xe0?\xa4p=\n\xd7\xa3\xe0?\x11\x11\x11\x11\x11\x11\xe1?\x11\x11\x11\x11\x11\x11\xe1?\xecQ\xb8\x1e\x85\xeb\xe1?\xecQ\xb8\x1e\x85\xeb\xe1?\xecQ\xb8\x1e\x85\xeb\xe1?~\xb1\xe4\x17K~\xe1?~\xb1\xe4\x17K~\xe1?~\xb1\xe4\x17K~\xe1?~\xb1\xe4\x17K~\xe1?\x11\x11\x11\x11\x11\x11\xe1?\xa4p=\n\xd7\xa3\xe0?O\x1b\xe8\xb4\x81N\xdb?)\\\x8f\xc2\xf5(\xdc?\x03\x9d6\xd0i\x03\xdd?\x03\x9d6\xd0i\x03\xdd?\x03\x9d6\xd0i\x03\xdd?\xb8\x1e\x85\xebQ\xb8\xde?\xb8\x1e\x85\xebQ\xb8\xde?\xb8\x1e\x85\xebQ\xb8\xde?\xb8\x1e\x85\xebQ\xb8\xde?\xb8\x1e\x85\xebQ\xb8\xde?7\xd0i\x03\x9d6\xe0?7\xd0i\x03\x9d6\xe0?7\xd0i\x03\x9d6\xe0?\xa4p=\n\xd7\xa3\xe0?\xa4p=\n\xd7\xa3\xe0?\xa4p=\n\xd7\xa3\xe0?\xa4p=\n\xd7\xa3\xe0?\xa4p=\n\xd7\xa3\xe0?\x11\x11\x11\x11\x11\x11\xe1?\x11\x11\x11\x11\x11\x11\xe1?\x11\x11\x11\x11\x11\x11\xe1?\x11\x11\x11\x11\x11\x11\xe1?\x11\x11\x11\x11\x11\x11\xe1?\x11\x11\x11\x11\x11\x11\xe1?\x11\x11\x11\x11\x11\x11\xe1?\x11\x11\x11\x11\x11\x11\xe1?\x11\x11\x11\x11\x11\x11\xe1?O\x1b\xe8\xb4\x81N\xdb?\xde\xdd\xdd\xdd\xdd\xdd\xdd?\x93_,\xf9\xc5\x92\xdf?\x11\x11\x11\x11\x11\x11\xe1?Y\xf2\x8b%\xbfX\xe2?\xc6\x92_,\xf9\xc5\xe2?\xa0\xd3\x06:m\xa0\xe3?\xa0\xd3\x06:m\xa0\xe3?\x0et\xda@\xa7\r\xe4?\x0et\xda@\xa7\r\xe4?\x0et\xda@\xa7\r\xe4?\x0et\xda@\xa7\r\xe4?{\x14\xaeG\xe1z\xe4?\xe8\xb4\x81N\x1b\xe8\xe4?\xe8\xb4\x81N\x1b\xe8\xe4?\xe8\xb4\x81N\x1b\xe8\xe4?\xe8\xb4\x81N\x1b\xe8\xe4?{\x14\xaeG\xe1z\xe4?\xa0\xd3\x06:m\xa0\xe3?\xa0\xd3\x06:m\xa0\xe3?\xa0\xd3\x06:m\xa0\xe3?333333\xe3?333333\xe3?333333\xe3?333333\xe3?333333\xe3?333333\xe3?O\x1b\xe8\xb4\x81N\xdb?7\xd0i\x03\x9d6\xe0?\xa4p=\n\xd7\xa3\xe0?\xa0\xd3\x06:m\xa0\xe3?{\x14\xaeG\xe1z\xe4?\xc3\xf5(\\\x8f\xc2\xe5?\x9d6\xd0i\x03\x9d\xe6?\x9d6\xd0i\x03\x9d\xe6?wwwwww\xe7?wwwwww\xe7?R\xb8\x1e\x85\xebQ\xe8?\xbfX\xf2\x8b%\xbf\xe8?,\xf9\xc5\x92_,\xe9?,\xf9\xc5\x92_,\xe9?,\xf9\xc5\x92_,\xe9?,\xf9\xc5\x92_,\xe9?,\xf9\xc5\x92_,\xe9?\xbfX\xf2\x8b%\xbf\xe8?\xbfX\xf2\x8b%\xbf\xe8?\xbfX\xf2\x8b%\xbf\xe8?\xbfX\xf2\x8b%\xbf\xe8?\xbfX\xf2\x8b%\xbf\xe8?\xbfX\xf2\x8b%\xbf\xe8?\xbfX\xf2\x8b%\xbf\xe8?\xbfX\xf2\x8b%\xbf\xe8?\xbfX\xf2\x8b%\xbf\xe8?R\xb8\x1e\x85\xebQ\xe8?O\x1b\xe8\xb4\x81N\xdb?7\xd0i\x03\x9d6\xe0?\x11\x11\x11\x11\x11\x11\xe1?\xa0\xd3\x06:m\xa0\xe3?\xe8\xb4\x81N\x1b\xe8\xe4?0\x96\xfcb\xc9/\xe6?\n\xd7\xa3p=\n\xe7?wwwwww\xe7?\xe5\x17K~\xb1\xe4\xe7?\xe5\x17K~\xb1\xe4\xe7?\xe5\x17K~\xb1\xe4\xe7?R\xb8\x1e\x85\xebQ\xe8?\xbfX\xf2\x8b%\xbf\xe8?\xbfX\xf2\x8b%\xbf\xe8?\x9a\x99\x99\x99\x99\x99\xe9?\x07:m\xa0\xd3\x06\xea?\x07:m\xa0\xd3\x06\xea?\x07:m\xa0\xd3\x06\xea?\x07:m\xa0\xd3\x06\xea?\x07:m\xa0\xd3\x06\xea?\x07:m\xa0\xd3\x06\xea?\x07:m\xa0\xd3\x06\xea?\x07:m\xa0\xd3\x06\xea?\x07:m\xa0\xd3\x06\xea?\x07:m\xa0\xd3\x06\xea?\x07:m\xa0\xd3\x06\xea?\x07:m\xa0\xd3\x06\xea?O\x1b\xe8\xb4\x81N\xdb?\xa4p=\n\xd7\xa3\xe0?{\x14\xaeG\xe1z\xe4?0\x96\xfcb\xc9/\xe6?R\xb8\x1e\x85\xebQ\xe8?,\xf9\xc5\x92_,\xe9?t\xda@\xa7\rt\xea?\xbc\xbb\xbb\xbb\xbb\xbb\xeb?\xbc\xbb\xbb\xbb\xbb\xbb\xeb?)\\\x8f\xc2\xf5(\xec?)\\\x8f\xc2\xf5(\xec?)\\\x8f\xc2\xf5(\xec?\xbc\xbb\xbb\xbb\xbb\xbb\xeb?)\\\x8f\xc2\xf5(\xec?)\\\x8f\xc2\xf5(\xec?)\\\x8f\xc2\xf5(\xec?\x03\x9d6\xd0i\x03\xed?q=\n\xd7\xa3p\xed?q=\n\xd7\xa3p\xed?K~\xb1\xe4\x17K\xee?K~\xb1\xe4\x17K\xee?\xb8\x1e\x85\xebQ\xb8\xee?\xb8\x1e\x85\xebQ\xb8\xee?&\xbfX\xf2\x8b%\xef?\xb8\x1e\x85\xebQ\xb8\xee?K~\xb1\xe4\x17K\xee?\xb8\x1e\x85\xebQ\xb8\xee?O\x1b\xe8\xb4\x81N\xdb?7\xd0i\x03\x9d6\xe0?\x0et\xda@\xa7\r\xe4?\x0et\xda@\xa7\r\xe4?\x9d6\xd0i\x03\x9d\xe6?\n\xd7\xa3p=\n\xe7?R\xb8\x1e\x85\xebQ\xe8?\xbfX\xf2\x8b%\xbf\xe8?\xbfX\xf2\x8b%\xbf\xe8?R\xb8\x1e\x85\xebQ\xe8?\xbfX\xf2\x8b%\xbf\xe8?t\xda@\xa7\rt\xea?O\x1b\xe8\xb4\x81N\xeb?\xbc\xbb\xbb\xbb\xbb\xbb\xeb?O\x1b\xe8\xb4\x81N\xeb?O\x1b\xe8\xb4\x81N\xeb?O\x1b\xe8\xb4\x81N\xeb?O\x1b\xe8\xb4\x81N\xeb?O\x1b\xe8\xb4\x81N\xeb?O\x1b\xe8\xb4\x81N\xeb?\xbc\xbb\xbb\xbb\xbb\xbb\xeb?\xbc\xbb\xbb\xbb\xbb\xbb\xeb?\xbc\xbb\xbb\xbb\xbb\xbb\xeb?\xbc\xbb\xbb\xbb\xbb\xbb\xeb?)\\\x8f\xc2\xf5(\xec?)\\\x8f\xc2\xf5(\xec?)\\\x8f\xc2\xf5(\xec?O\x1b\xe8\xb4\x81N\xdb?7\xd0i\x03\x9d6\xe0?\xa0\xd3\x06:m\xa0\xe3?\xc3\xf5(\\\x8f\xc2\xe5?\xe5\x17K~\xb1\xe4\xe7?R\xb8\x1e\x85\xebQ\xe8?\x9a\x99\x99\x99\x99\x99\xe9?t\xda@\xa7\rt\xea?\xbc\xbb\xbb\xbb\xbb\xbb\xeb?)\\\x8f\xc2\xf5(\xec?\x03\x9d6\xd0i\x03\xed?\x03\x9d6\xd0i\x03\xed?\x93_,\xf9\xc5\x92\xef?\x93_,\xf9\xc5\x92\xef?\x93_,\xf9\xc5\x92\xef?\x00\x00\x00\x00\x00\x00\xf0?\x00\x00\x00\x00\x00\x00\xf0?\x00\x00\x00\x00\x00\x00\xf0?\x00\x00\x00\x00\x00\x00\xf0?\x00\x00\x00\x00\x00\x00\xf0?\x00\x00\x00\x00\x00\x00\xf0?\x00\x00\x00\x00\x00\x00\xf0?\x00\x00\x00\x00\x00\x00\xf0?\x00\x00\x00\x00\x00\x00\xf0?\x00\x00\x00\x00\x00\x00\xf0?\x00\x00\x00\x00\x00\x00\xf0?\x00\x00\x00\x00\x00\x00\xf0?O\x1b\xe8\xb4\x81N\xdb?\xa4p=\n\xd7\xa3\xe0?\xe8\xb4\x81N\x1b\xe8\xe4?\n\xd7\xa3p=\n\xe7?\xbfX\xf2\x8b%\xbf\xe8?,\xf9\xc5\x92_,\xe9?\x07:m\xa0\xd3\x06\xea?O\x1b\xe8\xb4\x81N\xeb?q=\n\xd7\xa3p\xed?K~\xb1\xe4\x17K\xee?&\xbfX\xf2\x8b%\xef?\x93_,\xf9\xc5\x92\xef?\x93_,\xf9\xc5\x92\xef?\x93_,\xf9\xc5\x92\xef?\x00\x00\x00\x00\x00\x00\xf0?\x00\x00\x00\x00\x00\x00\xf0?\x00\x00\x00\x00\x00\x00\xf0?\x00\x00\x00\x00\x00\x00\xf0?\x00\x00\x00\x00\x00\x00\xf0?\x00\x00\x00\x00\x00\x00\xf0?\x00\x00\x00\x00\x00\x00\xf0?\x00\x00\x00\x00\x00\x00\xf0?\x00\x00\x00\x00\x00\x00\xf0?\x00\x00\x00\x00\x00\x00\xf0?\x00\x00\x00\x00\x00\x00\xf0?\x00\x00\x00\x00\x00\x00\xf0?\x00\x00\x00\x00\x00\x00\xf0?O\x1b\xe8\xb4\x81N\xdb?7\xd0i\x03\x9d6\xe0?\xe8\xb4\x81N\x1b\xe8\xe4?\x9d6\xd0i\x03\x9d\xe6?R\xb8\x1e\x85\xebQ\xe8?\x9a\x99\x99\x99\x99\x99\xe9?t\xda@\xa7\rt\xea?\xbc\xbb\xbb\xbb\xbb\xbb\xeb?\xde\xdd\xdd\xdd\xdd\xdd\xed?\x93_,\xf9\xc5\x92\xef?\x00\x00\x00\x00\x00\x00\xf0?\x00\x00\x00\x00\x00\x00\xf0?\x00\x00\x00\x00\x00\x00\xf0?\x00\x00\x00\x00\x00\x00\xf0?\x00\x00\x00\x00\x00\x00\xf0?\x00\x00\x00\x00\x00\x00\xf0?\x00\x00\x00\x00\x00\x00\xf0?\x00\x00\x00\x00\x00\x00\xf0?\x00\x00\x00\x00\x00\x00\xf0?\x00\x00\x00\x00\x00\x00\xf0?\x00\x00\x00\x00\x00\x00\xf0?\x00\x00\x00\x00\x00\x00\xf0?\x00\x00\x00\x00\x00\x00\xf0?\x00\x00\x00\x00\x00\x00\xf0?\x00\x00\x00\x00\x00\x00\xf0?\x00\x00\x00\x00\x00\x00\xf0?\x00\x00\x00\x00\x00\x00\xf0?O\x1b\xe8\xb4\x81N\xdb?~\xb1\xe4\x17K~\xe1?\xe8\xb4\x81N\x1b\xe8\xe4?\x9d6\xd0i\x03\x9d\xe6?,\xf9\xc5\x92_,\xe9?O\x1b\xe8\xb4\x81N\xeb?q=\n\xd7\xa3p\xed?\xb8\x1e\x85\xebQ\xb8\xee?\x93_,\xf9\xc5\x92\xef?\x00\x00\x00\x00\x00\x00\xf0?\x00\x00\x00\x00\x00\x00\xf0?\x00\x00\x00\x00\x00\x00\xf0?\x00\x00\x00\x00\x00\x00\xf0?\x00\x00\x00\x00\x00\x00\xf0?\x00\x00\x00\x00\x00\x00\xf0?\x00\x00\x00\x00\x00\x00\xf0?\x00\x00\x00\x00\x00\x00\xf0?\x00\x00\x00\x00\x00\x00\xf0?\x00\x00\x00\x00\x00\x00\xf0?\x00\x00\x00\x00\x00\x00\xf0?\x00\x00\x00\x00\x00\x00\xf0?\x00\x00\x00\x00\x00\x00\xf0?\x00\x00\x00\x00\x00\x00\xf0?\x00\x00\x00\x00\x00\x00\xf0?\x00\x00\x00\x00\x00\x00\xf0?\x00\x00\x00\x00\x00\x00\xf0?\x00\x00\x00\x00\x00\x00\xf0?O\x1b\xe8\xb4\x81N\xdb?\x11\x11\x11\x11\x11\x11\xe1?{\x14\xaeG\xe1z\xe4?\n\xd7\xa3p=\n\xe7?\xbfX\xf2\x8b%\xbf\xe8?\x07:m\xa0\xd3\x06\xea?\xbc\xbb\xbb\xbb\xbb\xbb\xeb?\x96\xfcb\xc9/\x96\xec?\x03\x9d6\xd0i\x03\xed?\xb8\x1e\x85\xebQ\xb8\xee?\x93_,\xf9\xc5\x92\xef?\x93_,\xf9\xc5\x92\xef?\x00\x00\x00\x00\x00\x00\xf0?\x00\x00\x00\x00\x00\x00\xf0?\x00\x00\x00\x00\x00\x00\xf0?\x00\x00\x00\x00\x00\x00\xf0?\x00\x00\x00\x00\x00\x00\xf0?\x00\x00\x00\x00\x00\x00\xf0?\x00\x00\x00\x00\x00\x00\xf0?\x00\x00\x00\x00\x00\x00\xf0?\x00\x00\x00\x00\x00\x00\xf0?\x00\x00\x00\x00\x00\x00\xf0?\x00\x00\x00\x00\x00\x00\xf0?\x00\x00\x00\x00\x00\x00\xf0?\x00\x00\x00\x00\x00\x00\xf0?\x00\x00\x00\x00\x00\x00\xf0?\x00\x00\x00\x00\x00\x00\xf0?Y\xf2\x8b%\xbfX\xe2?333333\xe3?333333\xe3?\x0et\xda@\xa7\r\xe4?{\x14\xaeG\xe1z\xe4?\xe8\xb4\x81N\x1b\xe8\xe4?\n\xd7\xa3p=\n\xe7?\n\xd7\xa3p=\n\xe7?\n\xd7\xa3p=\n\xe7?\n\xd7\xa3p=\n\xe7?\n\xd7\xa3p=\n\xe7?\n\xd7\xa3p=\n\xe7?\n\xd7\xa3p=\n\xe7?wwwwww\xe7?wwwwww\xe7?wwwwww\xe7?wwwwww\xe7?wwwwww\xe7?wwwwww\xe7?\n\xd7\xa3p=\n\xe7?\n\xd7\xa3p=\n\xe7?\n\xd7\xa3p=\n\xe7?\n\xd7\xa3p=\n\xe7?\n\xd7\xa3p=\n\xe7?\n\xd7\xa3p=\n\xe7?\n\xd7\xa3p=\n\xe7?\n\xd7\xa3p=\n\xe7?Y\xf2\x8b%\xbfX\xe2?333333\xe3?333333\xe3?\xa0\xd3\x06:m\xa0\xe3?{\x14\xaeG\xe1z\xe4?\xe8\xb4\x81N\x1b\xe8\xe4?\xe8\xb4\x81N\x1b\xe8\xe4?\xc3\xf5(\\\x8f\xc2\xe5?\xc3\xf5(\\\x8f\xc2\xe5?\xc3\xf5(\\\x8f\xc2\xe5?\xc3\xf5(\\\x8f\xc2\xe5?\xc3\xf5(\\\x8f\xc2\xe5?\xc3\xf5(\\\x8f\xc2\xe5?\xc3\xf5(\\\x8f\xc2\xe5?\xc3\xf5(\\\x8f\xc2\xe5?0\x96\xfcb\xc9/\xe6?0\x96\xfcb\xc9/\xe6?0\x96\xfcb\xc9/\xe6?\xc3\xf5(\\\x8f\xc2\xe5?\xc3\xf5(\\\x8f\xc2\xe5?\xc3\xf5(\\\x8f\xc2\xe5?\xc3\xf5(\\\x8f\xc2\xe5?\xc3\xf5(\\\x8f\xc2\xe5?\xc3\xf5(\\\x8f\xc2\xe5?\xc3\xf5(\\\x8f\xc2\xe5?\xc3\xf5(\\\x8f\xc2\xe5?\xc3\xf5(\\\x8f\xc2\xe5?Y\xf2\x8b%\xbfX\xe2?333333\xe3?\x0et\xda@\xa7\r\xe4?\x0et\xda@\xa7\r\xe4?{\x14\xaeG\xe1z\xe4?\xe8\xb4\x81N\x1b\xe8\xe4?\xc3\xf5(\\\x8f\xc2\xe5?0\x96\xfcb\xc9/\xe6?0\x96\xfcb\xc9/\xe6?\x9d6\xd0i\x03\x9d\xe6?\x9d6\xd0i\x03\x9d\xe6?\x9d6\xd0i\x03\x9d\xe6?\x9d6\xd0i\x03\x9d\xe6?\x9d6\xd0i\x03\x9d\xe6?\x9d6\xd0i\x03\x9d\xe6?\x9d6\xd0i\x03\x9d\xe6?\x9d6\xd0i\x03\x9d\xe6?\x9d6\xd0i\x03\x9d\xe6?\x9d6\xd0i\x03\x9d\xe6?\x9d6\xd0i\x03\x9d\xe6?\x9d6\xd0i\x03\x9d\xe6?\x9d6\xd0i\x03\x9d\xe6?\n\xd7\xa3p=\n\xe7?\n\xd7\xa3p=\n\xe7?\n\xd7\xa3p=\n\xe7?\n\xd7\xa3p=\n\xe7?\n\xd7\xa3p=\n\xe7?Y\xf2\x8b%\xbfX\xe2?\xa0\xd3\x06:m\xa0\xe3?\xe8\xb4\x81N\x1b\xe8\xe4?wwwwww\xe7?\xe5\x17K~\xb1\xe4\xe7?R\xb8\x1e\x85\xebQ\xe8?,\xf9\xc5\x92_,\xe9?,\xf9\xc5\x92_,\xe9?,\xf9\xc5\x92_,\xe9?\xbfX\xf2\x8b%\xbf\xe8?\xbfX\xf2\x8b%\xbf\xe8?\xbfX\xf2\x8b%\xbf\xe8?\xbfX\xf2\x8b%\xbf\xe8?\xbfX\xf2\x8b%\xbf\xe8?\x9a\x99\x99\x99\x99\x99\xe9?,\xf9\xc5\x92_,\xe9?,\xf9\xc5\x92_,\xe9?,\xf9\xc5\x92_,\xe9?,\xf9\xc5\x92_,\xe9?,\xf9\xc5\x92_,\xe9?,\xf9\xc5\x92_,\xe9?,\xf9\xc5\x92_,\xe9?,\xf9\xc5\x92_,\xe9?,\xf9\xc5\x92_,\xe9?,\xf9\xc5\x92_,\xe9?,\xf9\xc5\x92_,\xe9?\xbfX\xf2\x8b%\xbf\xe8?Y\xf2\x8b%\xbfX\xe2?\xa0\xd3\x06:m\xa0\xe3?UUUUUU\xe5?,\xf9\xc5\x92_,\xe9?\x9a\x99\x99\x99\x99\x99\xe9?\x07:m\xa0\xd3\x06\xea?\xe1z\x14\xaeG\xe1\xea?\xe1z\x14\xaeG\xe1\xea?O\x1b\xe8\xb4\x81N\xeb?\xe1z\x14\xaeG\xe1\xea?\xe1z\x14\xaeG\xe1\xea?\xe1z\x14\xaeG\xe1\xea?\xe1z\x14\xaeG\xe1\xea?\xe1z\x14\xaeG\xe1\xea?\xe1z\x14\xaeG\xe1\xea?\xe1z\x14\xaeG\xe1\xea?t\xda@\xa7\rt\xea?t\xda@\xa7\rt\xea?t\xda@\xa7\rt\xea?\xe1z\x14\xaeG\xe1\xea?\xe1z\x14\xaeG\xe1\xea?\xe1z\x14\xaeG\xe1\xea?\xe1z\x14\xaeG\xe1\xea?t\xda@\xa7\rt\xea?t\xda@\xa7\rt\xea?t\xda@\xa7\rt\xea?t\xda@\xa7\rt\xea?Y\xf2\x8b%\xbfX\xe2?\xa0\xd3\x06:m\xa0\xe3?{\x14\xaeG\xe1z\xe4?\xe5\x17K~\xb1\xe4\xe7?,\xf9\xc5\x92_,\xe9?\x9a\x99\x99\x99\x99\x99\xe9?t\xda@\xa7\rt\xea?\xe1z\x14\xaeG\xe1\xea?\xbc\xbb\xbb\xbb\xbb\xbb\xeb?\xbc\xbb\xbb\xbb\xbb\xbb\xeb?\xbc\xbb\xbb\xbb\xbb\xbb\xeb?\xbc\xbb\xbb\xbb\xbb\xbb\xeb?\xbc\xbb\xbb\xbb\xbb\xbb\xeb?\xbc\xbb\xbb\xbb\xbb\xbb\xeb?O\x1b\xe8\xb4\x81N\xeb?O\x1b\xe8\xb4\x81N\xeb?O\x1b\xe8\xb4\x81N\xeb?O\x1b\xe8\xb4\x81N\xeb?O\x1b\xe8\xb4\x81N\xeb?O\x1b\xe8\xb4\x81N\xeb?O\x1b\xe8\xb4\x81N\xeb?\xbc\xbb\xbb\xbb\xbb\xbb\xeb?\xbc\xbb\xbb\xbb\xbb\xbb\xeb?\xbc\xbb\xbb\xbb\xbb\xbb\xeb?\xbc\xbb\xbb\xbb\xbb\xbb\xeb?\xbc\xbb\xbb\xbb\xbb\xbb\xeb?\xbc\xbb\xbb\xbb\xbb\xbb\xeb?Y\xf2\x8b%\xbfX\xe2?wwwwww\xe7?\xe1z\x14\xaeG\xe1\xea?\x03\x9d6\xd0i\x03\xed?\xde\xdd\xdd\xdd\xdd\xdd\xed?\xde\xdd\xdd\xdd\xdd\xdd\xed?K~\xb1\xe4\x17K\xee?\xb8\x1e\x85\xebQ\xb8\xee?\xb8\x1e\x85\xebQ\xb8\xee?\xb8\x1e\x85\xebQ\xb8\xee?\xb8\x1e\x85\xebQ\xb8\xee?\xb8\x1e\x85\xebQ\xb8\xee?\xb8\x1e\x85\xebQ\xb8\xee?\xb8\x1e\x85\xebQ\xb8\xee?\xb8\x1e\x85\xebQ\xb8\xee?&\xbfX\xf2\x8b%\xef?&\xbfX\xf2\x8b%\xef?&\xbfX\xf2\x8b%\xef?&\xbfX\xf2\x8b%\xef?&\xbfX\xf2\x8b%\xef?&\xbfX\xf2\x8b%\xef?&\xbfX\xf2\x8b%\xef?&\xbfX\xf2\x8b%\xef?&\xbfX\xf2\x8b%\xef?&\xbfX\xf2\x8b%\xef?&\xbfX\xf2\x8b%\xef?&\xbfX\xf2\x8b%\xef?Y\xf2\x8b%\xbfX\xe2?\xc3\xf5(\\\x8f\xc2\xe5?,\xf9\xc5\x92_,\xe9?\xbc\xbb\xbb\xbb\xbb\xbb\xeb?\x03\x9d6\xd0i\x03\xed?q=\n\xd7\xa3p\xed?\xde\xdd\xdd\xdd\xdd\xdd\xed?\xde\xdd\xdd\xdd\xdd\xdd\xed?K~\xb1\xe4\x17K\xee?K~\xb1\xe4\x17K\xee?K~\xb1\xe4\x17K\xee?K~\xb1\xe4\x17K\xee?K~\xb1\xe4\x17K\xee?K~\xb1\xe4\x17K\xee?K~\xb1\xe4\x17K\xee?\xb8\x1e\x85\xebQ\xb8\xee?\xb8\x1e\x85\xebQ\xb8\xee?\xb8\x1e\x85\xebQ\xb8\xee?\xb8\x1e\x85\xebQ\xb8\xee?\xb8\x1e\x85\xebQ\xb8\xee?\xb8\x1e\x85\xebQ\xb8\xee?\xb8\x1e\x85\xebQ\xb8\xee?&\xbfX\xf2\x8b%\xef?&\xbfX\xf2\x8b%\xef?&\xbfX\xf2\x8b%\xef?&\xbfX\xf2\x8b%\xef?&\xbfX\xf2\x8b%\xef?Y\xf2\x8b%\xbfX\xe2?0\x96\xfcb\xc9/\xe6?t\xda@\xa7\rt\xea?)\\\x8f\xc2\xf5(\xec?\x03\x9d6\xd0i\x03\xed?\x03\x9d6\xd0i\x03\xed?&\xbfX\xf2\x8b%\xef?\x93_,\xf9\xc5\x92\xef?\x93_,\xf9\xc5\x92\xef?\x93_,\xf9\xc5\x92\xef?\x93_,\xf9\xc5\x92\xef?\x93_,\xf9\xc5\x92\xef?\x93_,\xf9\xc5\x92\xef?\x93_,\xf9\xc5\x92\xef?\x93_,\xf9\xc5\x92\xef?\x93_,\xf9\xc5\x92\xef?\x00\x00\x00\x00\x00\x00\xf0?\x00\x00\x00\x00\x00\x00\xf0?\x00\x00\x00\x00\x00\x00\xf0?\x00\x00\x00\x00\x00\x00\xf0?\x00\x00\x00\x00\x00\x00\xf0?\x00\x00\x00\x00\x00\x00\xf0?\x00\x00\x00\x00\x00\x00\xf0?\x00\x00\x00\x00\x00\x00\xf0?\x00\x00\x00\x00\x00\x00\xf0?\x00\x00\x00\x00\x00\x00\xf0?\x00\x00\x00\x00\x00\x00\xf0?Y\xf2\x8b%\xbfX\xe2?\x9a\x99\x99\x99\x99\x99\xe9?\x96\xfcb\xc9/\x96\xec?\xde\xdd\xdd\xdd\xdd\xdd\xed?&\xbfX\xf2\x8b%\xef?&\xbfX\xf2\x8b%\xef?&\xbfX\xf2\x8b%\xef?&\xbfX\xf2\x8b%\xef?\x93_,\xf9\xc5\x92\xef?\x00\x00\x00\x00\x00\x00\xf0?\x00\x00\x00\x00\x00\x00\xf0?\x00\x00\x00\x00\x00\x00\xf0?\x00\x00\x00\x00\x00\x00\xf0?\x00\x00\x00\x00\x00\x00\xf0?\x00\x00\x00\x00\x00\x00\xf0?\x00\x00\x00\x00\x00\x00\xf0?\x00\x00\x00\x00\x00\x00\xf0?\x00\x00\x00\x00\x00\x00\xf0?\x00\x00\x00\x00\x00\x00\xf0?\x00\x00\x00\x00\x00\x00\xf0?\x00\x00\x00\x00\x00\x00\xf0?\x00\x00\x00\x00\x00\x00\xf0?\x00\x00\x00\x00\x00\x00\xf0?\x00\x00\x00\x00\x00\x00\xf0?\x00\x00\x00\x00\x00\x00\xf0?\x00\x00\x00\x00\x00\x00\xf0?\x00\x00\x00\x00\x00\x00\xf0?Y\xf2\x8b%\xbfX\xe2?0\x96\xfcb\xc9/\xe6?\xbc\xbb\xbb\xbb\xbb\xbb\xeb?\x03\x9d6\xd0i\x03\xed?&\xbfX\xf2\x8b%\xef?\x93_,\xf9\xc5\x92\xef?\x00\x00\x00\x00\x00\x00\xf0?\x00\x00\x00\x00\x00\x00\xf0?\x00\x00\x00\x00\x00\x00\xf0?\x00\x00\x00\x00\x00\x00\xf0?\x00\x00\x00\x00\x00\x00\xf0?\x00\x00\x00\x00\x00\x00\xf0?\x00\x00\x00\x00\x00\x00\xf0?\x00\x00\x00\x00\x00\x00\xf0?\x00\x00\x00\x00\x00\x00\xf0?\x00\x00\x00\x00\x00\x00\xf0?\x00\x00\x00\x00\x00\x00\xf0?\x00\x00\x00\x00\x00\x00\xf0?\x00\x00\x00\x00\x00\x00\xf0?\x00\x00\x00\x00\x00\x00\xf0?\x00\x00\x00\x00\x00\x00\xf0?\x00\x00\x00\x00\x00\x00\xf0?\x00\x00\x00\x00\x00\x00\xf0?\x00\x00\x00\x00\x00\x00\xf0?\x00\x00\x00\x00\x00\x00\xf0?\x00\x00\x00\x00\x00\x00\xf0?\x00\x00\x00\x00\x00\x00\xf0?Y\xf2\x8b%\xbfX\xe2?\xbfX\xf2\x8b%\xbf\xe8?\x96\xfcb\xc9/\x96\xec?\xb8\x1e\x85\xebQ\xb8\xee?\x93_,\xf9\xc5\x92\xef?\x93_,\xf9\xc5\x92\xef?\x00\x00\x00\x00\x00\x00\xf0?\x00\x00\x00\x00\x00\x00\xf0?\x00\x00\x00\x00\x00\x00\xf0?\x00\x00\x00\x00\x00\x00\xf0?\x00\x00\x00\x00\x00\x00\xf0?\x00\x00\x00\x00\x00\x00\xf0?\x00\x00\x00\x00\x00\x00\xf0?\x00\x00\x00\x00\x00\x00\xf0?\x00\x00\x00\x00\x00\x00\xf0?\x00\x00\x00\x00\x00\x00\xf0?\x00\x00\x00\x00\x00\x00\xf0?\x00\x00\x00\x00\x00\x00\xf0?\x00\x00\x00\x00\x00\x00\xf0?\x00\x00\x00\x00\x00\x00\xf0?\x00\x00\x00\x00\x00\x00\xf0?\x00\x00\x00\x00\x00\x00\xf0?\x00\x00\x00\x00\x00\x00\xf0?\x00\x00\x00\x00\x00\x00\xf0?\x00\x00\x00\x00\x00\x00\xf0?\x00\x00\x00\x00\x00\x00\xf0?\x00\x00\x00\x00\x00\x00\xf0?Y\xf2\x8b%\xbfX\xe2?,\xf9\xc5\x92_,\xe9?)\\\x8f\xc2\xf5(\xec?q=\n\xd7\xa3p\xed?&\xbfX\xf2\x8b%\xef?\x00\x00\x00\x00\x00\x00\xf0?\x00\x00\x00\x00\x00\x00\xf0?\x00\x00\x00\x00\x00\x00\xf0?\x00\x00\x00\x00\x00\x00\xf0?\x00\x00\x00\x00\x00\x00\xf0?\x00\x00\x00\x00\x00\x00\xf0?\x00\x00\x00\x00\x00\x00\xf0?\x00\x00\x00\x00\x00\x00\xf0?\x00\x00\x00\x00\x00\x00\xf0?\x00\x00\x00\x00\x00\x00\xf0?\x00\x00\x00\x00\x00\x00\xf0?\x00\x00\x00\x00\x00\x00\xf0?\x00\x00\x00\x00\x00\x00\xf0?\x00\x00\x00\x00\x00\x00\xf0?\x00\x00\x00\x00\x00\x00\xf0?\x00\x00\x00\x00\x00\x00\xf0?\x00\x00\x00\x00\x00\x00\xf0?\x00\x00\x00\x00\x00\x00\xf0?\x00\x00\x00\x00\x00\x00\xf0?\x00\x00\x00\x00\x00\x00\xf0?\x00\x00\x00\x00\x00\x00\xf0?\x00\x00\x00\x00\x00\x00\xf0?\xe5\x17K~\xb1\xe4\xb7?\xe5\x17K~\xb1\xe4\xb7?\xe5\x17K~\xb1\xe4\xb7?O\x1b\xe8\xb4\x81N\xbb?O\x1b\xe8\xb4\x81N\xbb?O\x1b\xe8\xb4\x81N\xbb?O\x1b\xe8\xb4\x81N\xbb?O\x1b\xe8\xb4\x81N\xbb?O\x1b\xe8\xb4\x81N\xbb?O\x1b\xe8\xb4\x81N\xbb?\xb8\x1e\x85\xebQ\xb8\xbe?\xb8\x1e\x85\xebQ\xb8\xbe?\xb8\x1e\x85\xebQ\xb8\xbe?\xb8\x1e\x85\xebQ\xb8\xbe?\xb8\x1e\x85\xebQ\xb8\xbe?\xb8\x1e\x85\xebQ\xb8\xbe?O\x1b\xe8\xb4\x81N\xbb?{\x14\xaeG\xe1z\xb4?{\x14\xaeG\xe1z\xb4?{\x14\xaeG\xe1z\xb4?O\x1b\xe8\xb4\x81N\xab?O\x1b\xe8\xb4\x81N\xab?O\x1b\xe8\xb4\x81N\xab?O\x1b\xe8\xb4\x81N\xab?O\x1b\xe8\xb4\x81N\xab?O\x1b\xe8\xb4\x81N\xab?{\x14\xaeG\xe1z\xa4?\xe5\x17K~\xb1\xe4\xb7?\xe5\x17K~\xb1\xe4\xb7?\xe5\x17K~\xb1\xe4\xb7?O\x1b\xe8\xb4\x81N\xbb?\xb8\x1e\x85\xebQ\xb8\xbe?\x11\x11\x11\x11\x11\x11\xc1?\x11\x11\x11\x11\x11\x11\xc1?\xc6\x92_,\xf9\xc5\xc2?\xc6\x92_,\xf9\xc5\xc2?\x11\x11\x11\x11\x11\x11\xc1?\xb8\x1e\x85\xebQ\xb8\xbe?\xb8\x1e\x85\xebQ\xb8\xbe?\xb8\x1e\x85\xebQ\xb8\xbe?O\x1b\xe8\xb4\x81N\xbb?{\x14\xaeG\xe1z\xb4?\x11\x11\x11\x11\x11\x11\xb1?O\x1b\xe8\xb4\x81N\xab?O\x1b\xe8\xb4\x81N\xab?O\x1b\xe8\xb4\x81N\xab?O\x1b\xe8\xb4\x81N\xab?{\x14\xaeG\xe1z\xa4?O\x1b\xe8\xb4\x81N\x9b?O\x1b\xe8\xb4\x81N\x9b?O\x1b\xe8\xb4\x81N\x9b?O\x1b\xe8\xb4\x81N\x9b?O\x1b\xe8\xb4\x81N\x9b?O\x1b\xe8\xb4\x81N\x9b?\xe5\x17K~\xb1\xe4\xb7?\xe5\x17K~\xb1\xe4\xb7?\xe5\x17K~\xb1\xe4\xb7?O\x1b\xe8\xb4\x81N\xbb?\xb8\x1e\x85\xebQ\xb8\xbe?\xb8\x1e\x85\xebQ\xb8\xbe?\xb8\x1e\x85\xebQ\xb8\xbe?\x11\x11\x11\x11\x11\x11\xc1?\x11\x11\x11\x11\x11\x11\xc1?\x11\x11\x11\x11\x11\x11\xc1?\x11\x11\x11\x11\x11\x11\xc1?\xb8\x1e\x85\xebQ\xb8\xbe?O\x1b\xe8\xb4\x81N\xbb?O\x1b\xe8\xb4\x81N\xbb?O\x1b\xe8\xb4\x81N\xbb?O\x1b\xe8\xb4\x81N\xbb?O\x1b\xe8\xb4\x81N\xbb?\xe5\x17K~\xb1\xe4\xb7?\xe5\x17K~\xb1\xe4\xb7?{\x14\xaeG\xe1z\xb4?{\x14\xaeG\xe1z\xb4?\x11\x11\x11\x11\x11\x11\xb1?\x11\x11\x11\x11\x11\x11\xb1?O\x1b\xe8\xb4\x81N\xab?O\x1b\xe8\xb4\x81N\xab?O\x1b\xe8\xb4\x81N\xab?{\x14\xaeG\xe1z\xa4?\xe5\x17K~\xb1\xe4\xb7?\xe5\x17K~\xb1\xe4\xb7?\xe5\x17K~\xb1\xe4\xb7?O\x1b\xe8\xb4\x81N\xbb?\xe5\x17K~\xb1\xe4\xb7?\xe5\x17K~\xb1\xe4\xb7?{\x14\xaeG\xe1z\xb4?\x11\x11\x11\x11\x11\x11\xb1?\x11\x11\x11\x11\x11\x11\xb1?\x11\x11\x11\x11\x11\x11\xb1?O\x1b\xe8\xb4\x81N\x9b?O\x1b\xe8\xb4\x81N\x9b?\x00\x00\x00\x00\x00\x00\x00\x00\x00\x00\x00\x00\x00\x00\x00\x00\x00\x00\x00\x00\x00\x00\x00\x00\x00\x00\x00\x00\x00\x00\x00\x00\x00\x00\x00\x00\x00\x00\x00\x00\x00\x00\x00\x00\x00\x00\x00\x00\x00\x00\x00\x00\x00\x00\x00\x00\x00\x00\x00\x00\x00\x00\x00\x00\x00\x00\x00\x00\x00\x00\x00\x00\x00\x00\x00\x00\x00\x00\x00\x00\x00\x00\x00\x00\x00\x00\x00\x00\x00\x00\x00\x00\x00\x00\x00\x00\x00\x00\x00\x00\x00\x00\x00\x00\x00\x00\x00\x00\x00\x00\x00\x00\x00\x00\x00\x00\x00\x00\x00\x00\xe5\x17K~\xb1\xe4\xb7?O\x1b\xe8\xb4\x81N\xbb?O\x1b\xe8\xb4\x81N\xbb?O\x1b\xe8\xb4\x81N\xbb?O\x1b\xe8\xb4\x81N\xbb?O\x1b\xe8\xb4\x81N\xbb?\xe5\x17K~\xb1\xe4\xb7?\xe5\x17K~\xb1\xe4\xb7?{\x14\xaeG\xe1z\xb4?\x11\x11\x11\x11\x11\x11\xb1?\x11\x11\x11\x11\x11\x11\xb1?O\x1b\xe8\xb4\x81N\xab?O\x1b\xe8\xb4\x81N\xab?O\x1b\xe8\xb4\x81N\xab?{\x14\xaeG\xe1z\xa4?{\x14\xaeG\xe1z\xa4?{\x14\xaeG\xe1z\xa4?{\x14\xaeG\xe1z\xa4?O\x1b\xe8\xb4\x81N\x9b?O\x1b\xe8\xb4\x81N\x8b?\x00\x00\x00\x00\x00\x00\x00\x00\x00\x00\x00\x00\x00\x00\x00\x00\x00\x00\x00\x00\x00\x00\x00\x00\x00\x00\x00\x00\x00\x00\x00\x00\x00\x00\x00\x00\x00\x00\x00\x00\x00\x00\x00\x00\x00\x00\x00\x00\x00\x00\x00\x00\x00\x00\x00\x00\xe5\x17K~\xb1\xe4\xb7?O\x1b\xe8\xb4\x81N\xbb?O\x1b\xe8\xb4\x81N\xbb?O\x1b\xe8\xb4\x81N\xbb?O\x1b\xe8\xb4\x81N\xbb?O\x1b\xe8\xb4\x81N\xbb?O\x1b\xe8\xb4\x81N\xbb?O\x1b\xe8\xb4\x81N\xbb?O\x1b\xe8\xb4\x81N\xbb?\xe5\x17K~\xb1\xe4\xb7?{\x14\xaeG\xe1z\xb4?\x11\x11\x11\x11\x11\x11\xb1?O\x1b\xe8\xb4\x81N\xab?O\x1b\xe8\xb4\x81N\xab?O\x1b\xe8\xb4\x81N\xab?O\x1b\xe8\xb4\x81N\xab?O\x1b\xe8\xb4\x81N\x9b?O\x1b\xe8\xb4\x81N\x9b?O\x1b\xe8\xb4\x81N\x9b?O\x1b\xe8\xb4\x81N\x8b?\x00\x00\x00\x00\x00\x00\x00\x00\x00\x00\x00\x00\x00\x00\x00\x00\x00\x00\x00\x00\x00\x00\x00\x00\x00\x00\x00\x00\x00\x00\x00\x00\x00\x00\x00\x00\x00\x00\x00\x00\x00\x00\x00\x00\x00\x00\x00\x00\x00\x00\x00\x00\x00\x00\x00\x00\xe5\x17K~\xb1\xe4\xb7?\x11\x11\x11\x11\x11\x11\xc1?\xc6\x92_,\xf9\xc5\xc2?\xc6\x92_,\xf9\xc5\xc2?\xe5\x17K~\xb1\xe4\xc7?\x9a\x99\x99\x99\x99\x99\xc9?O\x1b\xe8\xb4\x81N\xcb?\x03\x9d6\xd0i\x03\xcd?\x9a\x99\x99\x99\x99\x99\xc9?{\x14\xaeG\xe1z\xc4?\xb8\x1e\x85\xebQ\xb8\xbe?{\x14\xaeG\xe1z\xb4?O\x1b\xe8\xb4\x81N\xab?{\x14\xaeG\xe1z\xa4?{\x14\xaeG\xe1z\xa4?O\x1b\xe8\xb4\x81N\x8b?\x00\x00\x00\x00\x00\x00\x00\x00\x00\x00\x00\x00\x00\x00\x00\x00\x00\x00\x00\x00\x00\x00\x00\x00\x00\x00\x00\x00\x00\x00\x00\x00\x00\x00\x00\x00\x00\x00\x00\x00\x00\x00\x00\x00\x00\x00\x00\x00\x00\x00\x00\x00\x00\x00\x00\x00\x00\x00\x00\x00\x00\x00\x00\x00\x00\x00\x00\x00\x00\x00\x00\x00\x00\x00\x00\x00\x00\x00\x00\x00\x00\x00\x00\x00\x00\x00\x00\x00\xe5\x17K~\xb1\xe4\xb7?\xb8\x1e\x85\xebQ\xb8\xbe?{\x14\xaeG\xe1z\xc4?0\x96\xfcb\xc9/\xc6?\xe5\x17K~\xb1\xe4\xc7?\x9a\x99\x99\x99\x99\x99\xc9?O\x1b\xe8\xb4\x81N\xcb?O\x1b\xe8\xb4\x81N\xcb?\x03\x9d6\xd0i\x03\xcd?\x03\x9d6\xd0i\x03\xcd?\x03\x9d6\xd0i\x03\xcd?\x03\x9d6\xd0i\x03\xcd?\x03\x9d6\xd0i\x03\xcd?\x03\x9d6\xd0i\x03\xcd?\xb8\x1e\x85\xebQ\xb8\xce?\xb8\x1e\x85\xebQ\xb8\xce?O\x1b\xe8\xb4\x81N\xcb?O\x1b\xe8\xb4\x81N\xcb?O\x1b\xe8\xb4\x81N\xcb?O\x1b\xe8\xb4\x81N\xcb?O\x1b\xe8\xb4\x81N\xcb?\x9a\x99\x99\x99\x99\x99\xc9?\x9a\x99\x99\x99\x99\x99\xc9?\x9a\x99\x99\x99\x99\x99\xc9?\xe5\x17K~\xb1\xe4\xc7?0\x96\xfcb\xc9/\xc6?0\x96\xfcb\xc9/\xc6?\xe5\x17K~\xb1\xe4\xb7?{\x14\xaeG\xe1z\xc4?0\x96\xfcb\xc9/\xc6?\x9a\x99\x99\x99\x99\x99\xc9?\x03\x9d6\xd0i\x03\xcd?\xb8\x1e\x85\xebQ\xb8\xce?{\x14\xaeG\xe1z\xd4?\xe5\x17K~\xb1\xe4\xd7?O\x1b\xe8\xb4\x81N\xdb?\x03\x9d6\xd0i\x03\xdd?\x93_,\xf9\xc5\x92\xdf?\x11\x11\x11\x11\x11\x11\xe1?333333\xe3?\xe8\xb4\x81N\x1b\xe8\xe4?\xc3\xf5(\\\x8f\xc2\xe5?0\x96\xfcb\xc9/\xe6?\x9d6\xd0i\x03\x9d\xe6?\x9d6\xd0i\x03\x9d\xe6?\xe8\xb4\x81N\x1b\xe8\xe4?\xe8\xb4\x81N\x1b\xe8\xe4?UUUUUU\xe5?{\x14\xaeG\xe1z\xe4?{\x14\xaeG\xe1z\xe4?{\x14\xaeG\xe1z\xe4?{\x14\xaeG\xe1z\xe4?{\x14\xaeG\xe1z\xe4?{\x14\xaeG\xe1z\xe4?\xe5\x17K~\xb1\xe4\xb7?O\x1b\xe8\xb4\x81N\xcb?7\xd0i\x03\x9d6\xd0?\xc6\x92_,\xf9\xc5\xd2?\xbfX\xf2\x8b%\xbf\xd8?\xde\xdd\xdd\xdd\xdd\xdd\xdd?\xecQ\xb8\x1e\x85\xeb\xe1?0\x96\xfcb\xc9/\xe6?\x07:m\xa0\xd3\x06\xea?O\x1b\xe8\xb4\x81N\xeb?q=\n\xd7\xa3p\xed?K~\xb1\xe4\x17K\xee?\xb8\x1e\x85\xebQ\xb8\xee?&\xbfX\xf2\x8b%\xef?&\xbfX\xf2\x8b%\xef?&\xbfX\xf2\x8b%\xef?&\xbfX\xf2\x8b%\xef?&\xbfX\xf2\x8b%\xef?&\xbfX\xf2\x8b%\xef?&\xbfX\xf2\x8b%\xef?&\xbfX\xf2\x8b%\xef?&\xbfX\xf2\x8b%\xef?&\xbfX\xf2\x8b%\xef?&\xbfX\xf2\x8b%\xef?&\xbfX\xf2\x8b%\xef?\xb8\x1e\x85\xebQ\xb8\xee?\xb8\x1e\x85\xebQ\xb8\xee?\xe5\x17K~\xb1\xe4\xb7?\x03\x9d6\xd0i\x03\xcd?7\xd0i\x03\x9d6\xd0?\xa0\xd3\x06:m\xa0\xd3?\x9a\x99\x99\x99\x99\x99\xd9?~\xb1\xe4\x17K~\xe1?UUUUUU\xe5?\xe5\x17K~\xb1\xe4\xe7?t\xda@\xa7\rt\xea?\xbc\xbb\xbb\xbb\xbb\xbb\xeb?\x03\x9d6\xd0i\x03\xed?\xde\xdd\xdd\xdd\xdd\xdd\xed?&\xbfX\xf2\x8b%\xef?\x93_,\xf9\xc5\x92\xef?\x93_,\xf9\xc5\x92\xef?\x00\x00\x00\x00\x00\x00\xf0?\x00\x00\x00\x00\x00\x00\xf0?\x00\x00\x00\x00\x00\x00\xf0?\x00\x00\x00\x00\x00\x00\xf0?\x00\x00\x00\x00\x00\x00\xf0?\x00\x00\x00\x00\x00\x00\xf0?\x00\x00\x00\x00\x00\x00\xf0?\x00\x00\x00\x00\x00\x00\xf0?\x00\x00\x00\x00\x00\x00\xf0?\x00\x00\x00\x00\x00\x00\xf0?\x00\x00\x00\x00\x00\x00\xf0?\x00\x00\x00\x00\x00\x00\xf0?\xe5\x17K~\xb1\xe4\xb7?\xb8\x1e\x85\xebQ\xb8\xce?\xc6\x92_,\xf9\xc5\xd2?\xe5\x17K~\xb1\xe4\xd7?~\xb1\xe4\x17K~\xe1?UUUUUU\xe5?\xe5\x17K~\xb1\xe4\xe7?\xe1z\x14\xaeG\xe1\xea?\x96\xfcb\xc9/\x96\xec?K~\xb1\xe4\x17K\xee?&\xbfX\xf2\x8b%\xef?&\xbfX\xf2\x8b%\xef?\x93_,\xf9\xc5\x92\xef?\x00\x00\x00\x00\x00\x00\xf0?\x00\x00\x00\x00\x00\x00\xf0?\x00\x00\x00\x00\x00\x00\xf0?\x00\x00\x00\x00\x00\x00\xf0?\x00\x00\x00\x00\x00\x00\xf0?\x00\x00\x00\x00\x00\x00\xf0?\x00\x00\x00\x00\x00\x00\xf0?\x00\x00\x00\x00\x00\x00\xf0?\x00\x00\x00\x00\x00\x00\xf0?\x00\x00\x00\x00\x00\x00\xf0?\x00\x00\x00\x00\x00\x00\xf0?\x00\x00\x00\x00\x00\x00\xf0?\x00\x00\x00\x00\x00\x00\xf0?\x00\x00\x00\x00\x00\x00\xf0?\xe5\x17K~\xb1\xe4\xb7?\x11\x11\x11\x11\x11\x11\xd1?\xa0\xd3\x06:m\xa0\xd3?)\\\x8f\xc2\xf5(\xdc?\xc6\x92_,\xf9\xc5\xe2?UUUUUU\xe5?R\xb8\x1e\x85\xebQ\xe8?\xbfX\xf2\x8b%\xbf\xe8?t\xda@\xa7\rt\xea?\xbc\xbb\xbb\xbb\xbb\xbb\xeb?\x03\x9d6\xd0i\x03\xed?\xde\xdd\xdd\xdd\xdd\xdd\xed?K~\xb1\xe4\x17K\xee?\xb8\x1e\x85\xebQ\xb8\xee?\xb8\x1e\x85\xebQ\xb8\xee?&\xbfX\xf2\x8b%\xef?&\xbfX\xf2\x8b%\xef?&\xbfX\xf2\x8b%\xef?\x00\x00\x00\x00\x00\x00\xf0?\x00\x00\x00\x00\x00\x00\xf0?\x00\x00\x00\x00\x00\x00\xf0?\x00\x00\x00\x00\x00\x00\xf0?\x00\x00\x00\x00\x00\x00\xf0?\x00\x00\x00\x00\x00\x00\xf0?\x00\x00\x00\x00\x00\x00\xf0?\x00\x00\x00\x00\x00\x00\xf0?\x00\x00\x00\x00\x00\x00\xf0?\x9a\x99\x99\x99\x99\x99\xc9?\x9a\x99\x99\x99\x99\x99\xc9?\x9a\x99\x99\x99\x99\x99\xc9?0\x96\xfcb\xc9/\xc6?{\x14\xaeG\xe1z\xc4?\xc6\x92_,\xf9\xc5\xc2?\xe5\x17K~\xb1\xe4\xb7?{\x14\xaeG\xe1z\xb4?{\x14\xaeG\xe1z\xb4?\x11\x11\x11\x11\x11\x11\xb1?O\x1b\xe8\xb4\x81N\xab?O\x1b\xe8\xb4\x81N\x9b?\x00\x00\x00\x00\x00\x00\x00\x00\x00\x00\x00\x00\x00\x00\x00\x00\x00\x00\x00\x00\x00\x00\x00\x00\x00\x00\x00\x00\x00\x00\x00\x00\x00\x00\x00\x00\x00\x00\x00\x00\x00\x00\x00\x00\x00\x00\x00\x00\x00\x00\x00\x00\x00\x00\x00\x00\x00\x00\x00\x00\x00\x00\x00\x00\x00\x00\x00\x00\x00\x00\x00\x00\x00\x00\x00\x00\x00\x00\x00\x00\x00\x00\x00\x00\x00\x00\x00\x00\x00\x00\x00\x00\x00\x00\x00\x00\x00\x00\x00\x00\x00\x00\x00\x00\x00\x00\x00\x00\x00\x00\x00\x00\x00\x00\x00\x00\x00\x00\x00\x00\x9a\x99\x99\x99\x99\x99\xc9?\x9a\x99\x99\x99\x99\x99\xc9?\x9a\x99\x99\x99\x99\x99\xc9?\xe5\x17K~\xb1\xe4\xc7?{\x14\xaeG\xe1z\xc4?\xe5\x17K~\xb1\xe4\xb7?\xe5\x17K~\xb1\xe4\xb7?{\x14\xaeG\xe1z\xb4?O\x1b\xe8\xb4\x81N\xab?O\x1b\xe8\xb4\x81N\x9b?O\x1b\xe8\xb4\x81N\x8b?\x00\x00\x00\x00\x00\x00\x00\x00\x00\x00\x00\x00\x00\x00\x00\x00\x00\x00\x00\x00\x00\x00\x00\x00\x00\x00\x00\x00\x00\x00\x00\x00\x00\x00\x00\x00\x00\x00\x00\x00\x00\x00\x00\x00\x00\x00\x00\x00\x00\x00\x00\x00\x00\x00\x00\x00\x00\x00\x00\x00\x00\x00\x00\x00\x00\x00\x00\x00\x00\x00\x00\x00\x00\x00\x00\x00\x00\x00\x00\x00\x00\x00\x00\x00\x00\x00\x00\x00\x00\x00\x00\x00\x00\x00\x00\x00\x00\x00\x00\x00\x00\x00\x00\x00\x00\x00\x00\x00\x00\x00\x00\x00\x00\x00\x00\x00\x00\x00\x00\x00\x00\x00\x00\x00\x00\x00\x00\x00\x9a\x99\x99\x99\x99\x99\xc9?\x9a\x99\x99\x99\x99\x99\xc9?\x9a\x99\x99\x99\x99\x99\xc9?0\x96\xfcb\xc9/\xc6?\xc6\x92_,\xf9\xc5\xc2?{\x14\xaeG\xe1z\xb4?\x11\x11\x11\x11\x11\x11\xb1?{\x14\xaeG\xe1z\xa4?O\x1b\xe8\xb4\x81N\x8b?\x00\x00\x00\x00\x00\x00\x00\x00\x00\x00\x00\x00\x00\x00\x00\x00\x00\x00\x00\x00\x00\x00\x00\x00\x00\x00\x00\x00\x00\x00\x00\x00\x00\x00\x00\x00\x00\x00\x00\x00\x00\x00\x00\x00\x00\x00\x00\x00\x00\x00\x00\x00\x00\x00\x00\x00\x00\x00\x00\x00\x00\x00\x00\x00\x00\x00\x00\x00\x00\x00\x00\x00\x00\x00\x00\x00\x00\x00\x00\x00\x00\x00\x00\x00\x00\x00\x00\x00\x00\x00\x00\x00\x00\x00\x00\x00\x00\x00\x00\x00\x00\x00\x00\x00\x00\x00\x00\x00\x00\x00\x00\x00\x00\x00\x00\x00\x00\x00\x00\x00\x00\x00\x00\x00\x00\x00\x00\x00\x00\x00\x00\x00\x00\x00\x00\x00\x00\x00\x00\x00\x00\x00\x00\x00\x9a\x99\x99\x99\x99\x99\xc9?O\x1b\xe8\xb4\x81N\xcb?O\x1b\xe8\xb4\x81N\xcb?\x03\x9d6\xd0i\x03\xcd?\x9a\x99\x99\x99\x99\x99\xc9?\xe5\x17K~\xb1\xe4\xc7?\x11\x11\x11\x11\x11\x11\xc1?\xe5\x17K~\xb1\xe4\xb7?{\x14\xaeG\xe1z\xb4?O\x1b\xe8\xb4\x81N\xab?\x00\x00\x00\x00\x00\x00\x00\x00\x00\x00\x00\x00\x00\x00\x00\x00\x00\x00\x00\x00\x00\x00\x00\x00\x00\x00\x00\x00\x00\x00\x00\x00\x00\x00\x00\x00\x00\x00\x00\x00\x00\x00\x00\x00\x00\x00\x00\x00\x00\x00\x00\x00\x00\x00\x00\x00\x00\x00\x00\x00\x00\x00\x00\x00\x00\x00\x00\x00\x00\x00\x00\x00\x00\x00\x00\x00\x00\x00\x00\x00\x00\x00\x00\x00\x00\x00\x00\x00\x00\x00\x00\x00\x00\x00\x00\x00\x00\x00\x00\x00\x00\x00\x00\x00\x00\x00\x00\x00\x00\x00\x00\x00\x00\x00\x00\x00\x00\x00\x00\x00\x00\x00\x00\x00\x00\x00\x00\x00\x00\x00\x00\x00\x00\x00\x00\x00\x9a\x99\x99\x99\x99\x99\xc9?O\x1b\xe8\xb4\x81N\xcb?\x03\x9d6\xd0i\x03\xcd?\x03\x9d6\xd0i\x03\xcd?\x11\x11\x11\x11\x11\x11\xd1?O\x1b\xe8\xb4\x81N\xcb?\xe5\x17K~\xb1\xe4\xc7?\x11\x11\x11\x11\x11\x11\xc1?\xe5\x17K~\xb1\xe4\xb7?\x11\x11\x11\x11\x11\x11\xb1?O\x1b\xe8\xb4\x81N\x9b?\x00\x00\x00\x00\x00\x00\x00\x00\x00\x00\x00\x00\x00\x00\x00\x00\x00\x00\x00\x00\x00\x00\x00\x00\x00\x00\x00\x00\x00\x00\x00\x00\x00\x00\x00\x00\x00\x00\x00\x00\x00\x00\x00\x00\x00\x00\x00\x00\x00\x00\x00\x00\x00\x00\x00\x00\x00\x00\x00\x00\x00\x00\x00\x00\x00\x00\x00\x00\x00\x00\x00\x00\x00\x00\x00\x00\x00\x00\x00\x00\x00\x00\x00\x00\x00\x00\x00\x00\x00\x00\x00\x00\x00\x00\x00\x00\x00\x00\x00\x00\x00\x00\x00\x00\x00\x00\x00\x00\x00\x00\x00\x00\x00\x00\x00\x00\x00\x00\x00\x00\x00\x00\x00\x00\x00\x00\x00\x00\x9a\x99\x99\x99\x99\x99\xc9?O\x1b\xe8\xb4\x81N\xcb?7\xd0i\x03\x9d6\xd0?\xc6\x92_,\xf9\xc5\xd2?\xc6\x92_,\xf9\xc5\xd2?\xc6\x92_,\xf9\xc5\xd2?\xa0\xd3\x06:m\xa0\xd3?\xc6\x92_,\xf9\xc5\xd2?O\x1b\xe8\xb4\x81N\xcb?\xb8\x1e\x85\xebQ\xb8\xbe?\xe5\x17K~\xb1\xe4\xb7?O\x1b\xe8\xb4\x81N\x9b?O\x1b\xe8\xb4\x81N\x8b?\x00\x00\x00\x00\x00\x00\x00\x00\x00\x00\x00\x00\x00\x00\x00\x00\x00\x00\x00\x00\x00\x00\x00\x00\x00\x00\x00\x00\x00\x00\x00\x00\x00\x00\x00\x00\x00\x00\x00\x00\x00\x00\x00\x00\x00\x00\x00\x00\x00\x00\x00\x00\x00\x00\x00\x00\x00\x00\x00\x00\x00\x00\x00\x00\x00\x00\x00\x00\x00\x00\x00\x00\x00\x00\x00\x00\x00\x00\x00\x00\x00\x00\x00\x00\x00\x00\x00\x00\x00\x00\x00\x00\x00\x00\x00\x00\x00\x00\x00\x00\x00\x00\x00\x00\x00\x00\x00\x00\x00\x00\x00\x00\x9a\x99\x99\x99\x99\x99\xc9?7\xd0i\x03\x9d6\xd0?\x11\x11\x11\x11\x11\x11\xd1?0\x96\xfcb\xc9/\xd6?)\\\x8f\xc2\xf5(\xdc?\xde\xdd\xdd\xdd\xdd\xdd\xdd?\xde\xdd\xdd\xdd\xdd\xdd\xdd?t\xda@\xa7\rt\xda?t\xda@\xa7\rt\xda?\xbfX\xf2\x8b%\xbf\xd8?0\x96\xfcb\xc9/\xd6?\xecQ\xb8\x1e\x85\xeb\xd1?\x03\x9d6\xd0i\x03\xcd?\xe5\x17K~\xb1\xe4\xc7?\xc6\x92_,\xf9\xc5\xc2?\x11\x11\x11\x11\x11\x11\xc1?\x11\x11\x11\x11\x11\x11\xc1?\x11\x11\x11\x11\x11\x11\xc1?\xc6\x92_,\xf9\xc5\xc2?\xb8\x1e\x85\xebQ\xb8\xbe?\xb8\x1e\x85\xebQ\xb8\xbe?\xb8\x1e\x85\xebQ\xb8\xbe?O\x1b\xe8\xb4\x81N\xbb?O\x1b\xe8\xb4\x81N\xbb?O\x1b\xe8\xb4\x81N\xbb?\xb8\x1e\x85\xebQ\xb8\xbe?\xb8\x1e\x85\xebQ\xb8\xbe?\x9a\x99\x99\x99\x99\x99\xc9?\xb8\x1e\x85\xebQ\xb8\xce?\xc6\x92_,\xf9\xc5\xd2?\n\xd7\xa3p=\n\xd7?O\x1b\xe8\xb4\x81N\xdb?\x03\x9d6\xd0i\x03\xdd?7\xd0i\x03\x9d6\xe0?\xa4p=\n\xd7\xa3\xe0?~\xb1\xe4\x17K~\xe1?\x11\x11\x11\x11\x11\x11\xe1?\x11\x11\x11\x11\x11\x11\xe1?\x11\x11\x11\x11\x11\x11\xe1?\x11\x11\x11\x11\x11\x11\xe1?\xecQ\xb8\x1e\x85\xeb\xe1?~\xb1\xe4\x17K~\xe1?\xa4p=\n\xd7\xa3\xe0?\xa4p=\n\xd7\xa3\xe0?7\xd0i\x03\x9d6\xe0?\x93_,\xf9\xc5\x92\xdf?7\xd0i\x03\x9d6\xe0?7\xd0i\x03\x9d6\xe0?7\xd0i\x03\x9d6\xe0?7\xd0i\x03\x9d6\xe0?7\xd0i\x03\x9d6\xe0?\x93_,\xf9\xc5\x92\xdf?\x93_,\xf9\xc5\x92\xdf?\xb8\x1e\x85\xebQ\xb8\xde?\x9a\x99\x99\x99\x99\x99\xc9?\x03\x9d6\xd0i\x03\xcd?\xc6\x92_,\xf9\xc5\xd2?\x9a\x99\x99\x99\x99\x99\xd9?t\xda@\xa7\rt\xda?\x93_,\xf9\xc5\x92\xdf?7\xd0i\x03\x9d6\xe0?\xa0\xd3\x06:m\xa0\xe3?\xa0\xd3\x06:m\xa0\xe3?\x0et\xda@\xa7\r\xe4?{\x14\xaeG\xe1z\xe4?{\x14\xaeG\xe1z\xe4?\x0et\xda@\xa7\r\xe4?\x0et\xda@\xa7\r\xe4?333333\xe3?\xc6\x92_,\xf9\xc5\xe2?~\xb1\xe4\x17K~\xe1?\xecQ\xb8\x1e\x85\xeb\xe1?\xecQ\xb8\x1e\x85\xeb\xe1?\xecQ\xb8\x1e\x85\xeb\xe1?\xecQ\xb8\x1e\x85\xeb\xe1?\xecQ\xb8\x1e\x85\xeb\xe1?\xecQ\xb8\x1e\x85\xeb\xe1?\xecQ\xb8\x1e\x85\xeb\xe1?\xecQ\xb8\x1e\x85\xeb\xe1?\xecQ\xb8\x1e\x85\xeb\xe1?~\xb1\xe4\x17K~\xe1?\x9a\x99\x99\x99\x99\x99\xc9?UUUUUU\xd5?\x93_,\xf9\xc5\x92\xdf?\xa0\xd3\x06:m\xa0\xe3?\xc3\xf5(\\\x8f\xc2\xe5?\n\xd7\xa3p=\n\xe7?\xbfX\xf2\x8b%\xbf\xe8?\xbfX\xf2\x8b%\xbf\xe8?\xbfX\xf2\x8b%\xbf\xe8?R\xb8\x1e\x85\xebQ\xe8?\xe5\x17K~\xb1\xe4\xe7?\xe5\x17K~\xb1\xe4\xe7?wwwwww\xe7?0\x96\xfcb\xc9/\xe6?UUUUUU\xe5?{\x14\xaeG\xe1z\xe4?\xa0\xd3\x06:m\xa0\xe3?~\xb1\xe4\x17K~\xe1?\x11\x11\x11\x11\x11\x11\xe1?\x11\x11\x11\x11\x11\x11\xe1?\xa4p=\n\xd7\xa3\xe0?\xa4p=\n\xd7\xa3\xe0?7\xd0i\x03\x9d6\xe0?\x93_,\xf9\xc5\x92\xdf?\x93_,\xf9\xc5\x92\xdf?\xde\xdd\xdd\xdd\xdd\xdd\xdd?\xde\xdd\xdd\xdd\xdd\xdd\xdd?\x9a\x99\x99\x99\x99\x99\xc9?\n\xd7\xa3p=\n\xd7?\x93_,\xf9\xc5\x92\xdf?\xe8\xb4\x81N\x1b\xe8\xe4?\xe5\x17K~\xb1\xe4\xe7?t\xda@\xa7\rt\xea?\xbc\xbb\xbb\xbb\xbb\xbb\xeb?q=\n\xd7\xa3p\xed?\xde\xdd\xdd\xdd\xdd\xdd\xed?K~\xb1\xe4\x17K\xee?K~\xb1\xe4\x17K\xee?K~\xb1\xe4\x17K\xee?&\xbfX\xf2\x8b%\xef?&\xbfX\xf2\x8b%\xef?&\xbfX\xf2\x8b%\xef?&\xbfX\xf2\x8b%\xef?&\xbfX\xf2\x8b%\xef?&\xbfX\xf2\x8b%\xef?&\xbfX\xf2\x8b%\xef?&\xbfX\xf2\x8b%\xef?&\xbfX\xf2\x8b%\xef?&\xbfX\xf2\x8b%\xef?&\xbfX\xf2\x8b%\xef?&\xbfX\xf2\x8b%\xef?&\xbfX\xf2\x8b%\xef?&\xbfX\xf2\x8b%\xef?&\xbfX\xf2\x8b%\xef?\x9a\x99\x99\x99\x99\x99\xc9?\x9a\x99\x99\x99\x99\x99\xd9?Y\xf2\x8b%\xbfX\xe2?\xe5\x17K~\xb1\xe4\xe7?\x03\x9d6\xd0i\x03\xed?K~\xb1\xe4\x17K\xee?&\xbfX\xf2\x8b%\xef?\x93_,\xf9\xc5\x92\xef?\x93_,\xf9\xc5\x92\xef?\x00\x00\x00\x00\x00\x00\xf0?\x00\x00\x00\x00\x00\x00\xf0?\x00\x00\x00\x00\x00\x00\xf0?\x00\x00\x00\x00\x00\x00\xf0?\x00\x00\x00\x00\x00\x00\xf0?\x00\x00\x00\x00\x00\x00\xf0?\x00\x00\x00\x00\x00\x00\xf0?\x00\x00\x00\x00\x00\x00\xf0?\x00\x00\x00\x00\x00\x00\xf0?\x00\x00\x00\x00\x00\x00\xf0?\x00\x00\x00\x00\x00\x00\xf0?\x00\x00\x00\x00\x00\x00\xf0?\x00\x00\x00\x00\x00\x00\xf0?\x00\x00\x00\x00\x00\x00\xf0?\x00\x00\x00\x00\x00\x00\xf0?\x00\x00\x00\x00\x00\x00\xf0?\x00\x00\x00\x00\x00\x00\xf0?\x00\x00\x00\x00\x00\x00\xf0?\x9a\x99\x99\x99\x99\x99\xc9?)\\\x8f\xc2\xf5(\xdc?~\xb1\xe4\x17K~\xe1?\n\xd7\xa3p=\n\xe7?t\xda@\xa7\rt\xea?\x03\x9d6\xd0i\x03\xed?\xde\xdd\xdd\xdd\xdd\xdd\xed?\xde\xdd\xdd\xdd\xdd\xdd\xed?\xb8\x1e\x85\xebQ\xb8\xee?&\xbfX\xf2\x8b%\xef?&\xbfX\xf2\x8b%\xef?&\xbfX\xf2\x8b%\xef?&\xbfX\xf2\x8b%\xef?&\xbfX\xf2\x8b%\xef?&\xbfX\xf2\x8b%\xef?\x93_,\xf9\xc5\x92\xef?\x00\x00\x00\x00\x00\x00\xf0?\x00\x00\x00\x00\x00\x00\xf0?\x00\x00\x00\x00\x00\x00\xf0?\x00\x00\x00\x00\x00\x00\xf0?\x00\x00\x00\x00\x00\x00\xf0?\x00\x00\x00\x00\x00\x00\xf0?\x00\x00\x00\x00\x00\x00\xf0?\x00\x00\x00\x00\x00\x00\xf0?\x00\x00\x00\x00\x00\x00\xf0?\x00\x00\x00\x00\x00\x00\xf0?\x00\x00\x00\x00\x00\x00\xf0?\x11\x11\x11\x11\x11\x11\xd1?\x11\x11\x11\x11\x11\x11\xd1?\x11\x11\x11\x11\x11\x11\xd1?\x03\x9d6\xd0i\x03\xcd?\x03\x9d6\xd0i\x03\xcd?\x03\x9d6\xd0i\x03\xcd?\x03\x9d6\xd0i\x03\xcd?\x03\x9d6\xd0i\x03\xcd?O\x1b\xe8\xb4\x81N\xcb?0\x96\xfcb\xc9/\xc6?\xe5\x17K~\xb1\xe4\xc7?\xe5\x17K~\xb1\xe4\xc7?\xc6\x92_,\xf9\xc5\xc2?\xc6\x92_,\xf9\xc5\xc2?\x11\x11\x11\x11\x11\x11\xc1?\xb8\x1e\x85\xebQ\xb8\xbe?O\x1b\xe8\xb4\x81N\xbb?{\x14\xaeG\xe1z\xb4?O\x1b\xe8\xb4\x81N\xab?O\x1b\xe8\xb4\x81N\xab?O\x1b\xe8\xb4\x81N\xab?{\x14\xaeG\xe1z\xa4?{\x14\xaeG\xe1z\xa4?{\x14\xaeG\xe1z\xa4?{\x14\xaeG\xe1z\xa4?{\x14\xaeG\xe1z\xa4?{\x14\xaeG\xe1z\xa4?\x11\x11\x11\x11\x11\x11\xd1?\x11\x11\x11\x11\x11\x11\xd1?\x03\x9d6\xd0i\x03\xcd?\x03\x9d6\xd0i\x03\xcd?\x03\x9d6\xd0i\x03\xcd?\x03\x9d6\xd0i\x03\xcd?O\x1b\xe8\xb4\x81N\xcb?O\x1b\xe8\xb4\x81N\xcb?\xe5\x17K~\xb1\xe4\xc7?\xe5\x17K~\xb1\xe4\xc7?{\x14\xaeG\xe1z\xc4?{\x14\xaeG\xe1z\xc4?\xc6\x92_,\xf9\xc5\xc2?O\x1b\xe8\xb4\x81N\xbb?O\x1b\xe8\xb4\x81N\xbb?\xe5\x17K~\xb1\xe4\xb7?O\x1b\xe8\xb4\x81N\xab?O\x1b\xe8\xb4\x81N\xab?O\x1b\xe8\xb4\x81N\xab?O\x1b\xe8\xb4\x81N\xab?{\x14\xaeG\xe1z\xa4?{\x14\xaeG\xe1z\xa4?O\x1b\xe8\xb4\x81N\x8b?O\x1b\xe8\xb4\x81N\x8b?\x00\x00\x00\x00\x00\x00\x00\x00\x00\x00\x00\x00\x00\x00\x00\x00\x00\x00\x00\x00\x00\x00\x00\x00\x11\x11\x11\x11\x11\x11\xd1?\x11\x11\x11\x11\x11\x11\xd1?\x11\x11\x11\x11\x11\x11\xd1?7\xd0i\x03\x9d6\xd0?\xe5\x17K~\xb1\xe4\xc7?\xe5\x17K~\xb1\xe4\xc7?0\x96\xfcb\xc9/\xc6?0\x96\xfcb\xc9/\xc6?\xc6\x92_,\xf9\xc5\xc2?\x11\x11\x11\x11\x11\x11\xc1?\x11\x11\x11\x11\x11\x11\xc1?\xb8\x1e\x85\xebQ\xb8\xbe?O\x1b\xe8\xb4\x81N\xbb?\x11\x11\x11\x11\x11\x11\xb1?O\x1b\xe8\xb4\x81N\xab?O\x1b\xe8\xb4\x81N\x8b?\x00\x00\x00\x00\x00\x00\x00\x00\x00\x00\x00\x00\x00\x00\x00\x00\x00\x00\x00\x00\x00\x00\x00\x00\x00\x00\x00\x00\x00\x00\x00\x00\x00\x00\x00\x00\x00\x00\x00\x00\x00\x00\x00\x00\x00\x00\x00\x00\x00\x00\x00\x00\x00\x00\x00\x00\x00\x00\x00\x00\x00\x00\x00\x00\x00\x00\x00\x00\x00\x00\x00\x00\x00\x00\x00\x00\x00\x00\x00\x00\x00\x00\x00\x00\x00\x00\x00\x00\x11\x11\x11\x11\x11\x11\xd1?\xecQ\xb8\x1e\x85\xeb\xd1?\x11\x11\x11\x11\x11\x11\xd1?7\xd0i\x03\x9d6\xd0?0\x96\xfcb\xc9/\xc6?{\x14\xaeG\xe1z\xc4?\x11\x11\x11\x11\x11\x11\xc1?\xe5\x17K~\xb1\xe4\xb7?{\x14\xaeG\xe1z\xb4?{\x14\xaeG\xe1z\xa4?\x00\x00\x00\x00\x00\x00\x00\x00\x00\x00\x00\x00\x00\x00\x00\x00\x00\x00\x00\x00\x00\x00\x00\x00\x00\x00\x00\x00\x00\x00\x00\x00\x00\x00\x00\x00\x00\x00\x00\x00\x00\x00\x00\x00\x00\x00\x00\x00\x00\x00\x00\x00\x00\x00\x00\x00\x00\x00\x00\x00\x00\x00\x00\x00\x00\x00\x00\x00\x00\x00\x00\x00\x00\x00\x00\x00\x00\x00\x00\x00\x00\x00\x00\x00\x00\x00\x00\x00\x00\x00\x00\x00\x00\x00\x00\x00\x00\x00\x00\x00\x00\x00\x00\x00\x00\x00\x00\x00\x00\x00\x00\x00\x00\x00\x00\x00\x00\x00\x00\x00\x00\x00\x00\x00\x00\x00\x00\x00\x00\x00\x00\x00\x00\x00\x00\x00\x11\x11\x11\x11\x11\x11\xd1?\x11\x11\x11\x11\x11\x11\xd1?\xecQ\xb8\x1e\x85\xeb\xd1?\x11\x11\x11\x11\x11\x11\xd1?\x03\x9d6\xd0i\x03\xcd?0\x96\xfcb\xc9/\xc6?{\x14\xaeG\xe1z\xc4?\xc6\x92_,\xf9\xc5\xc2?O\x1b\xe8\xb4\x81N\xbb?O\x1b\xe8\xb4\x81N\xab?O\x1b\xe8\xb4\x81N\xab?{\x14\xaeG\xe1z\xa4?O\x1b\xe8\xb4\x81N\x8b?\x00\x00\x00\x00\x00\x00\x00\x00\x00\x00\x00\x00\x00\x00\x00\x00\x00\x00\x00\x00\x00\x00\x00\x00\x00\x00\x00\x00\x00\x00\x00\x00\x00\x00\x00\x00\x00\x00\x00\x00\x00\x00\x00\x00\x00\x00\x00\x00\x00\x00\x00\x00\x00\x00\x00\x00\x00\x00\x00\x00\x00\x00\x00\x00\x00\x00\x00\x00\x00\x00\x00\x00\x00\x00\x00\x00\x00\x00\x00\x00\x00\x00\x00\x00\x00\x00\x00\x00\x00\x00\x00\x00\x00\x00\x00\x00\x00\x00\x00\x00\x00\x00\x00\x00\x00\x00\x00\x00\x00\x00\x00\x00\x11\x11\x11\x11\x11\x11\xd1?7\xd0i\x03\x9d6\xd0?7\xd0i\x03\x9d6\xd0?7\xd0i\x03\x9d6\xd0?7\xd0i\x03\x9d6\xd0?\x03\x9d6\xd0i\x03\xcd?0\x96\xfcb\xc9/\xc6?{\x14\xaeG\xe1z\xc4?{\x14\xaeG\xe1z\xc4?O\x1b\xe8\xb4\x81N\xbb?\x11\x11\x11\x11\x11\x11\xb1?O\x1b\xe8\xb4\x81N\xab?{\x14\xaeG\xe1z\xa4?O\x1b\xe8\xb4\x81N\x9b?O\x1b\xe8\xb4\x81N\x9b?O\x1b\xe8\xb4\x81N\x8b?O\x1b\xe8\xb4\x81N\x8b?O\x1b\xe8\xb4\x81N\x8b?O\x1b\xe8\xb4\x81N\x8b?O\x1b\xe8\xb4\x81N\x8b?O\x1b\xe8\xb4\x81N\x8b?O\x1b\xe8\xb4\x81N\x8b?O\x1b\xe8\xb4\x81N\x8b?O\x1b\xe8\xb4\x81N\x8b?\x00\x00\x00\x00\x00\x00\x00\x00\x00\x00\x00\x00\x00\x00\x00\x00\x00\x00\x00\x00\x00\x00\x00\x00\x11\x11\x11\x11\x11\x11\xd1?7\xd0i\x03\x9d6\xd0?\x11\x11\x11\x11\x11\x11\xd1?7\xd0i\x03\x9d6\xd0?{\x14\xaeG\xe1z\xc4?\x11\x11\x11\x11\x11\x11\xc1?O\x1b\xe8\xb4\x81N\xbb?\xe5\x17K~\xb1\xe4\xb7?{\x14\xaeG\xe1z\xb4?\x11\x11\x11\x11\x11\x11\xb1?O\x1b\xe8\xb4\x81N\xab?O\x1b\xe8\xb4\x81N\x9b?\x00\x00\x00\x00\x00\x00\x00\x00\x00\x00\x00\x00\x00\x00\x00\x00\x00\x00\x00\x00\x00\x00\x00\x00\x00\x00\x00\x00\x00\x00\x00\x00\x00\x00\x00\x00\x00\x00\x00\x00\x00\x00\x00\x00\x00\x00\x00\x00\x00\x00\x00\x00\x00\x00\x00\x00\x00\x00\x00\x00\x00\x00\x00\x00\x00\x00\x00\x00\x00\x00\x00\x00\x00\x00\x00\x00\x00\x00\x00\x00\x00\x00\x00\x00\x00\x00\x00\x00\x00\x00\x00\x00\x00\x00\x00\x00\x00\x00\x00\x00\x00\x00\x00\x00\x00\x00\x00\x00\x00\x00\x00\x00\x00\x00\x00\x00\x00\x00\x00\x00\x11\x11\x11\x11\x11\x11\xd1?7\xd0i\x03\x9d6\xd0?7\xd0i\x03\x9d6\xd0?\xecQ\xb8\x1e\x85\xeb\xd1?7\xd0i\x03\x9d6\xd0?7\xd0i\x03\x9d6\xd0?\xb8\x1e\x85\xebQ\xb8\xce?7\xd0i\x03\x9d6\xd0?O\x1b\xe8\xb4\x81N\xcb?\xe5\x17K~\xb1\xe4\xc7?\xe5\x17K~\xb1\xe4\xc7?\xe5\x17K~\xb1\xe4\xc7?\xc6\x92_,\xf9\xc5\xc2?\xb8\x1e\x85\xebQ\xb8\xbe?\xe5\x17K~\xb1\xe4\xb7?\xe5\x17K~\xb1\xe4\xb7?\xe5\x17K~\xb1\xe4\xb7?{\x14\xaeG\xe1z\xb4?{\x14\xaeG\xe1z\xb4?\x11\x11\x11\x11\x11\x11\xb1?\x11\x11\x11\x11\x11\x11\xb1?\x11\x11\x11\x11\x11\x11\xb1?O\x1b\xe8\xb4\x81N\xab?{\x14\xaeG\xe1z\xa4?O\x1b\xe8\xb4\x81N\x9b?O\x1b\xe8\xb4\x81N\x9b?O\x1b\xe8\xb4\x81N\x8b?\x11\x11\x11\x11\x11\x11\xd1?7\xd0i\x03\x9d6\xd0?\xc6\x92_,\xf9\xc5\xd2?\xa0\xd3\x06:m\xa0\xd3?{\x14\xaeG\xe1z\xd4?UUUUUU\xd5?UUUUUU\xd5?UUUUUU\xd5?UUUUUU\xd5?\xa0\xd3\x06:m\xa0\xd3?\x11\x11\x11\x11\x11\x11\xd1?7\xd0i\x03\x9d6\xd0?\x11\x11\x11\x11\x11\x11\xd1?\xb8\x1e\x85\xebQ\xb8\xce?O\x1b\xe8\xb4\x81N\xcb?\x9a\x99\x99\x99\x99\x99\xc9?\x9a\x99\x99\x99\x99\x99\xc9?0\x96\xfcb\xc9/\xc6?0\x96\xfcb\xc9/\xc6?0\x96\xfcb\xc9/\xc6?\xe5\x17K~\xb1\xe4\xc7?0\x96\xfcb\xc9/\xc6?0\x96\xfcb\xc9/\xc6?0\x96\xfcb\xc9/\xc6?0\x96\xfcb\xc9/\xc6?0\x96\xfcb\xc9/\xc6?0\x96\xfcb\xc9/\xc6?\x11\x11\x11\x11\x11\x11\xd1?\xc6\x92_,\xf9\xc5\xd2?\xa0\xd3\x06:m\xa0\xd3?\n\xd7\xa3p=\n\xd7?\xe5\x17K~\xb1\xe4\xd7?O\x1b\xe8\xb4\x81N\xdb?t\xda@\xa7\rt\xda?\xe5\x17K~\xb1\xe4\xd7?{\x14\xaeG\xe1z\xd4?\xecQ\xb8\x1e\x85\xeb\xd1?O\x1b\xe8\xb4\x81N\xcb?\xe5\x17K~\xb1\xe4\xc7?{\x14\xaeG\xe1z\xc4?\xb8\x1e\x85\xebQ\xb8\xbe?\xe5\x17K~\xb1\xe4\xb7?O\x1b\xe8\xb4\x81N\xab?O\x1b\xe8\xb4\x81N\x9b?O\x1b\xe8\xb4\x81N\x9b?O\x1b\xe8\xb4\x81N\x9b?O\x1b\xe8\xb4\x81N\x9b?O\x1b\xe8\xb4\x81N\x9b?O\x1b\xe8\xb4\x81N\x9b?O\x1b\xe8\xb4\x81N\x8b?O\x1b\xe8\xb4\x81N\x8b?O\x1b\xe8\xb4\x81N\x8b?O\x1b\xe8\xb4\x81N\x8b?O\x1b\xe8\xb4\x81N\x8b?\x11\x11\x11\x11\x11\x11\xd1?\xa0\xd3\x06:m\xa0\xd3?\x9a\x99\x99\x99\x99\x99\xd9?\x03\x9d6\xd0i\x03\xdd?\xa4p=\n\xd7\xa3\xe0?\x11\x11\x11\x11\x11\x11\xe1?Y\xf2\x8b%\xbfX\xe2?\x0et\xda@\xa7\r\xe4?\x0et\xda@\xa7\r\xe4?\xe8\xb4\x81N\x1b\xe8\xe4?\x9d6\xd0i\x03\x9d\xe6?wwwwww\xe7?wwwwww\xe7?R\xb8\x1e\x85\xebQ\xe8?\xbfX\xf2\x8b%\xbf\xe8?\xbfX\xf2\x8b%\xbf\xe8?\xbfX\xf2\x8b%\xbf\xe8?\xbfX\xf2\x8b%\xbf\xe8?,\xf9\xc5\x92_,\xe9?\x07:m\xa0\xd3\x06\xea?\x07:m\xa0\xd3\x06\xea?t\xda@\xa7\rt\xea?\xe1z\x14\xaeG\xe1\xea?\xe1z\x14\xaeG\xe1\xea?\xbc\xbb\xbb\xbb\xbb\xbb\xeb?\xbc\xbb\xbb\xbb\xbb\xbb\xeb?\xbc\xbb\xbb\xbb\xbb\xbb\xeb?\x11\x11\x11\x11\x11\x11\xd1?0\x96\xfcb\xc9/\xd6?\x03\x9d6\xd0i\x03\xdd?\xa4p=\n\xd7\xa3\xe0?Y\xf2\x8b%\xbfX\xe2?\xa0\xd3\x06:m\xa0\xe3?UUUUUU\xe5?\xe5\x17K~\xb1\xe4\xe7?,\xf9\xc5\x92_,\xe9?\x07:m\xa0\xd3\x06\xea?t\xda@\xa7\rt\xea?O\x1b\xe8\xb4\x81N\xeb?O\x1b\xe8\xb4\x81N\xeb?\xbc\xbb\xbb\xbb\xbb\xbb\xeb?q=\n\xd7\xa3p\xed?q=\n\xd7\xa3p\xed?\xde\xdd\xdd\xdd\xdd\xdd\xed?\xde\xdd\xdd\xdd\xdd\xdd\xed?\xde\xdd\xdd\xdd\xdd\xdd\xed?\xde\xdd\xdd\xdd\xdd\xdd\xed?\xde\xdd\xdd\xdd\xdd\xdd\xed?\xde\xdd\xdd\xdd\xdd\xdd\xed?\xde\xdd\xdd\xdd\xdd\xdd\xed?\xde\xdd\xdd\xdd\xdd\xdd\xed?q=\n\xd7\xa3p\xed?q=\n\xd7\xa3p\xed?q=\n\xd7\xa3p\xed?\x11\x11\x11\x11\x11\x11\xd1?t\xda@\xa7\rt\xda?333333\xe3?\x0et\xda@\xa7\r\xe4?0\x96\xfcb\xc9/\xe6?R\xb8\x1e\x85\xebQ\xe8?\xbfX\xf2\x8b%\xbf\xe8?\x9a\x99\x99\x99\x99\x99\xe9?\xe1z\x14\xaeG\xe1\xea?\x03\x9d6\xd0i\x03\xed?q=\n\xd7\xa3p\xed?\xde\xdd\xdd\xdd\xdd\xdd\xed?K~\xb1\xe4\x17K\xee?\xb8\x1e\x85\xebQ\xb8\xee?\xb8\x1e\x85\xebQ\xb8\xee?\xb8\x1e\x85\xebQ\xb8\xee?&\xbfX\xf2\x8b%\xef?&\xbfX\xf2\x8b%\xef?\x93_,\xf9\xc5\x92\xef?\x93_,\xf9\xc5\x92\xef?\x00\x00\x00\x00\x00\x00\xf0?\x00\x00\x00\x00\x00\x00\xf0?\x00\x00\x00\x00\x00\x00\xf0?\x00\x00\x00\x00\x00\x00\xf0?\x00\x00\x00\x00\x00\x00\xf0?\x00\x00\x00\x00\x00\x00\xf0?\x00\x00\x00\x00\x00\x00\xf0?\xb8\x1e\x85\xebQ\xb8\xbe?\xb8\x1e\x85\xebQ\xb8\xbe?\xb8\x1e\x85\xebQ\xb8\xbe?\xb8\x1e\x85\xebQ\xb8\xbe?\xb8\x1e\x85\xebQ\xb8\xbe?\xb8\x1e\x85\xebQ\xb8\xbe?\x11\x11\x11\x11\x11\x11\xc1?\x11\x11\x11\x11\x11\x11\xc1?\xb8\x1e\x85\xebQ\xb8\xbe?\xb8\x1e\x85\xebQ\xb8\xbe?O\x1b\xe8\xb4\x81N\xbb?O\x1b\xe8\xb4\x81N\xbb?O\x1b\xe8\xb4\x81N\xbb?\xb8\x1e\x85\xebQ\xb8\xbe?\xb8\x1e\x85\xebQ\xb8\xbe?\xb8\x1e\x85\xebQ\xb8\xbe?\xb8\x1e\x85\xebQ\xb8\xbe?O\x1b\xe8\xb4\x81N\xbb?\x11\x11\x11\x11\x11\x11\xc1?\xc6\x92_,\xf9\xc5\xc2?\xc6\x92_,\xf9\xc5\xc2?\xc6\x92_,\xf9\xc5\xc2?\x11\x11\x11\x11\x11\x11\xc1?\x11\x11\x11\x11\x11\x11\xc1?O\x1b\xe8\xb4\x81N\xbb?O\x1b\xe8\xb4\x81N\xbb?\xe5\x17K~\xb1\xe4\xb7?\xb8\x1e\x85\xebQ\xb8\xbe?\xb8\x1e\x85\xebQ\xb8\xbe?O\x1b\xe8\xb4\x81N\xbb?\xb8\x1e\x85\xebQ\xb8\xbe?O\x1b\xe8\xb4\x81N\xbb?O\x1b\xe8\xb4\x81N\xbb?\x11\x11\x11\x11\x11\x11\xb1?\x11\x11\x11\x11\x11\x11\xb1?\x11\x11\x11\x11\x11\x11\xb1?\x11\x11\x11\x11\x11\x11\xb1?\x11\x11\x11\x11\x11\x11\xb1?\x11\x11\x11\x11\x11\x11\xb1?\x11\x11\x11\x11\x11\x11\xb1?O\x1b\xe8\xb4\x81N\xab?O\x1b\xe8\xb4\x81N\xab?\x11\x11\x11\x11\x11\x11\xb1?\x11\x11\x11\x11\x11\x11\xb1?\x11\x11\x11\x11\x11\x11\xb1?\x11\x11\x11\x11\x11\x11\xb1?\x11\x11\x11\x11\x11\x11\xb1?\x11\x11\x11\x11\x11\x11\xb1?O\x1b\xe8\xb4\x81N\xab?O\x1b\xe8\xb4\x81N\xab?O\x1b\xe8\xb4\x81N\xab?O\x1b\xe8\xb4\x81N\xab?O\x1b\xe8\xb4\x81N\x9b?O\x1b\xe8\xb4\x81N\x9b?\xb8\x1e\x85\xebQ\xb8\xbe?\xb8\x1e\x85\xebQ\xb8\xbe?\xb8\x1e\x85\xebQ\xb8\xbe?\xb8\x1e\x85\xebQ\xb8\xbe?O\x1b\xe8\xb4\x81N\xbb?\xb8\x1e\x85\xebQ\xb8\xbe?\xb8\x1e\x85\xebQ\xb8\xbe?\xb8\x1e\x85\xebQ\xb8\xbe?O\x1b\xe8\xb4\x81N\xbb?O\x1b\xe8\xb4\x81N\xbb?O\x1b\xe8\xb4\x81N\xbb?O\x1b\xe8\xb4\x81N\xbb?O\x1b\xe8\xb4\x81N\xbb?{\x14\xaeG\xe1z\xb4?{\x14\xaeG\xe1z\xb4?{\x14\xaeG\xe1z\xb4?{\x14\xaeG\xe1z\xb4?\xe5\x17K~\xb1\xe4\xb7?\xe5\x17K~\xb1\xe4\xb7?\xe5\x17K~\xb1\xe4\xb7?\x11\x11\x11\x11\x11\x11\xb1?\x11\x11\x11\x11\x11\x11\xb1?\x11\x11\x11\x11\x11\x11\xb1?\x11\x11\x11\x11\x11\x11\xb1?O\x1b\xe8\xb4\x81N\xab?O\x1b\xe8\xb4\x81N\xab?O\x1b\xe8\xb4\x81N\xab?\xb8\x1e\x85\xebQ\xb8\xbe?O\x1b\xe8\xb4\x81N\xbb?\xb8\x1e\x85\xebQ\xb8\xbe?\xc6\x92_,\xf9\xc5\xc2?\xc6\x92_,\xf9\xc5\xc2?\xc6\x92_,\xf9\xc5\xc2?{\x14\xaeG\xe1z\xc4?\x11\x11\x11\x11\x11\x11\xc1?\x11\x11\x11\x11\x11\x11\xc1?{\x14\xaeG\xe1z\xb4?O\x1b\xe8\xb4\x81N\xab?O\x1b\xe8\xb4\x81N\xab?{\x14\xaeG\xe1z\xa4?O\x1b\xe8\xb4\x81N\x9b?O\x1b\xe8\xb4\x81N\x9b?O\x1b\xe8\xb4\x81N\x9b?O\x1b\xe8\xb4\x81N\x8b?\x00\x00\x00\x00\x00\x00\x00\x00\x00\x00\x00\x00\x00\x00\x00\x00\x00\x00\x00\x00\x00\x00\x00\x00\x00\x00\x00\x00\x00\x00\x00\x00\x00\x00\x00\x00\x00\x00\x00\x00\x00\x00\x00\x00\x00\x00\x00\x00\x00\x00\x00\x00\x00\x00\x00\x00\x00\x00\x00\x00\x00\x00\x00\x00\x00\x00\x00\x00\x00\x00\x00\x00\x00\x00\x00\x00\x00\x00\x00\x00\xb8\x1e\x85\xebQ\xb8\xbe?O\x1b\xe8\xb4\x81N\xbb?\xb8\x1e\x85\xebQ\xb8\xbe?O\x1b\xe8\xb4\x81N\xbb?O\x1b\xe8\xb4\x81N\xbb?O\x1b\xe8\xb4\x81N\xbb?O\x1b\xe8\xb4\x81N\xbb?\xb8\x1e\x85\xebQ\xb8\xbe?\x11\x11\x11\x11\x11\x11\xc1?\x11\x11\x11\x11\x11\x11\xc1?\xb8\x1e\x85\xebQ\xb8\xbe?\xb8\x1e\x85\xebQ\xb8\xbe?\xe5\x17K~\xb1\xe4\xb7?{\x14\xaeG\xe1z\xb4?{\x14\xaeG\xe1z\xb4?\x11\x11\x11\x11\x11\x11\xb1?\x11\x11\x11\x11\x11\x11\xb1?O\x1b\xe8\xb4\x81N\xab?O\x1b\xe8\xb4\x81N\x9b?O\x1b\xe8\xb4\x81N\x8b?O\x1b\xe8\xb4\x81N\x8b?\x00\x00\x00\x00\x00\x00\x00\x00O\x1b\xe8\xb4\x81N\x8b?O\x1b\xe8\xb4\x81N\x8b?O\x1b\xe8\xb4\x81N\x8b?O\x1b\xe8\xb4\x81N\x8b?O\x1b\xe8\xb4\x81N\x8b?\xb8\x1e\x85\xebQ\xb8\xbe?\xb8\x1e\x85\xebQ\xb8\xbe?\x11\x11\x11\x11\x11\x11\xc1?\x11\x11\x11\x11\x11\x11\xc1?\x11\x11\x11\x11\x11\x11\xc1?0\x96\xfcb\xc9/\xc6?0\x96\xfcb\xc9/\xc6?\xe5\x17K~\xb1\xe4\xc7?\x9a\x99\x99\x99\x99\x99\xc9?O\x1b\xe8\xb4\x81N\xcb?O\x1b\xe8\xb4\x81N\xcb?\x03\x9d6\xd0i\x03\xcd?0\x96\xfcb\xc9/\xc6?{\x14\xaeG\xe1z\xc4?{\x14\xaeG\xe1z\xc4?{\x14\xaeG\xe1z\xc4?{\x14\xaeG\xe1z\xc4?0\x96\xfcb\xc9/\xc6?{\x14\xaeG\xe1z\xc4?{\x14\xaeG\xe1z\xc4?\x11\x11\x11\x11\x11\x11\xc1?\xb8\x1e\x85\xebQ\xb8\xbe?\xb8\x1e\x85\xebQ\xb8\xbe?O\x1b\xe8\xb4\x81N\xbb?O\x1b\xe8\xb4\x81N\xbb?O\x1b\xe8\xb4\x81N\xbb?O\x1b\xe8\xb4\x81N\xbb?\xb8\x1e\x85\xebQ\xb8\xbe?\xc6\x92_,\xf9\xc5\xc2?0\x96\xfcb\xc9/\xc6?O\x1b\xe8\xb4\x81N\xcb?\xb8\x1e\x85\xebQ\xb8\xce?\xecQ\xb8\x1e\x85\xeb\xd1?UUUUUU\xd5?0\x96\xfcb\xc9/\xd6?0\x96\xfcb\xc9/\xd6?0\x96\xfcb\xc9/\xd6?\xbfX\xf2\x8b%\xbf\xd8?\n\xd7\xa3p=\n\xd7?\xa0\xd3\x06:m\xa0\xd3?\xc6\x92_,\xf9\xc5\xd2?\xc6\x92_,\xf9\xc5\xd2?\xecQ\xb8\x1e\x85\xeb\xd1?O\x1b\xe8\xb4\x81N\xcb?O\x1b\xe8\xb4\x81N\xcb?\xe5\x17K~\xb1\xe4\xc7?0\x96\xfcb\xc9/\xc6?\xc6\x92_,\xf9\xc5\xc2?\x11\x11\x11\x11\x11\x11\xc1?\xb8\x1e\x85\xebQ\xb8\xbe?O\x1b\xe8\xb4\x81N\xbb?O\x1b\xe8\xb4\x81N\xbb?O\x1b\xe8\xb4\x81N\xbb?\xe5\x17K~\xb1\xe4\xb7?\xb8\x1e\x85\xebQ\xb8\xbe?\xc6\x92_,\xf9\xc5\xc2?{\x14\xaeG\xe1z\xc4?\x03\x9d6\xd0i\x03\xcd?\xecQ\xb8\x1e\x85\xeb\xd1?\xa0\xd3\x06:m\xa0\xd3?UUUUUU\xd5?\n\xd7\xa3p=\n\xd7?\xde\xdd\xdd\xdd\xdd\xdd\xdd?\x93_,\xf9\xc5\x92\xdf?\xb8\x1e\x85\xebQ\xb8\xde?7\xd0i\x03\x9d6\xe0?7\xd0i\x03\x9d6\xe0?7\xd0i\x03\x9d6\xe0?\xa4p=\n\xd7\xa3\xe0?~\xb1\xe4\x17K~\xe1?\xecQ\xb8\x1e\x85\xeb\xe1?\xecQ\xb8\x1e\x85\xeb\xe1?\xc6\x92_,\xf9\xc5\xe2?333333\xe3?333333\xe3?333333\xe3?\x0et\xda@\xa7\r\xe4?\x0et\xda@\xa7\r\xe4?\x0et\xda@\xa7\r\xe4?\x0et\xda@\xa7\r\xe4?\x0et\xda@\xa7\r\xe4?\xb8\x1e\x85\xebQ\xb8\xbe?\xc6\x92_,\xf9\xc5\xc2?\x9a\x99\x99\x99\x99\x99\xc9?7\xd0i\x03\x9d6\xd0?0\x96\xfcb\xc9/\xd6?t\xda@\xa7\rt\xda?\x03\x9d6\xd0i\x03\xdd?7\xd0i\x03\x9d6\xe0?\xa4p=\n\xd7\xa3\xe0?\xecQ\xb8\x1e\x85\xeb\xe1?\xa0\xd3\x06:m\xa0\xe3?\xe8\xb4\x81N\x1b\xe8\xe4?\xe8\xb4\x81N\x1b\xe8\xe4?\xc3\xf5(\\\x8f\xc2\xe5?\xc3\xf5(\\\x8f\xc2\xe5?\xc3\xf5(\\\x8f\xc2\xe5?0\x96\xfcb\xc9/\xe6?\n\xd7\xa3p=\n\xe7?wwwwww\xe7?wwwwww\xe7?wwwwww\xe7?\xe5\x17K~\xb1\xe4\xe7?R\xb8\x1e\x85\xebQ\xe8?\xbfX\xf2\x8b%\xbf\xe8?\xbfX\xf2\x8b%\xbf\xe8?R\xb8\x1e\x85\xebQ\xe8?R\xb8\x1e\x85\xebQ\xe8?\xb8\x1e\x85\xebQ\xb8\xbe?0\x96\xfcb\xc9/\xc6?\xecQ\xb8\x1e\x85\xeb\xd1?\x03\x9d6\xd0i\x03\xdd?~\xb1\xe4\x17K~\xe1?\xa0\xd3\x06:m\xa0\xe3?\n\xd7\xa3p=\n\xe7?wwwwww\xe7?\xbfX\xf2\x8b%\xbf\xe8?\x9a\x99\x99\x99\x99\x99\xe9?\x07:m\xa0\xd3\x06\xea?t\xda@\xa7\rt\xea?\xe1z\x14\xaeG\xe1\xea?O\x1b\xe8\xb4\x81N\xeb?\x96\xfcb\xc9/\x96\xec?\x96\xfcb\xc9/\x96\xec?\x96\xfcb\xc9/\x96\xec?\x03\x9d6\xd0i\x03\xed?\x03\x9d6\xd0i\x03\xed?\x03\x9d6\xd0i\x03\xed?\x96\xfcb\xc9/\x96\xec?\x96\xfcb\xc9/\x96\xec?\x03\x9d6\xd0i\x03\xed?\x03\x9d6\xd0i\x03\xed?\x03\x9d6\xd0i\x03\xed?\x03\x9d6\xd0i\x03\xed?\x03\x9d6\xd0i\x03\xed?\xb8\x1e\x85\xebQ\xb8\xbe?0\x96\xfcb\xc9/\xc6?\xc6\x92_,\xf9\xc5\xd2?O\x1b\xe8\xb4\x81N\xdb?7\xd0i\x03\x9d6\xe0?\xa0\xd3\x06:m\xa0\xe3?wwwwww\xe7?\x9a\x99\x99\x99\x99\x99\xe9?\xe1z\x14\xaeG\xe1\xea?q=\n\xd7\xa3p\xed?\xde\xdd\xdd\xdd\xdd\xdd\xed?K~\xb1\xe4\x17K\xee?\xb8\x1e\x85\xebQ\xb8\xee?\xb8\x1e\x85\xebQ\xb8\xee?\xb8\x1e\x85\xebQ\xb8\xee?&\xbfX\xf2\x8b%\xef?&\xbfX\xf2\x8b%\xef?&\xbfX\xf2\x8b%\xef?&\xbfX\xf2\x8b%\xef?\x93_,\xf9\xc5\x92\xef?\x93_,\xf9\xc5\x92\xef?\x93_,\xf9\xc5\x92\xef?\x93_,\xf9\xc5\x92\xef?\x93_,\xf9\xc5\x92\xef?\x93_,\xf9\xc5\x92\xef?\x93_,\xf9\xc5\x92\xef?\x93_,\xf9\xc5\x92\xef?\xb8\x1e\x85\xebQ\xb8\xbe?\xe5\x17K~\xb1\xe4\xc7?\x9a\x99\x99\x99\x99\x99\xd9?\x93_,\xf9\xc5\x92\xdf?\xc6\x92_,\xf9\xc5\xe2?wwwwww\xe7?\x07:m\xa0\xd3\x06\xea?)\\\x8f\xc2\xf5(\xec?K~\xb1\xe4\x17K\xee?\x93_,\xf9\xc5\x92\xef?\x93_,\xf9\xc5\x92\xef?\x93_,\xf9\xc5\x92\xef?\x93_,\xf9\xc5\x92\xef?\x93_,\xf9\xc5\x92\xef?\x93_,\xf9\xc5\x92\xef?\x00\x00\x00\x00\x00\x00\xf0?\x00\x00\x00\x00\x00\x00\xf0?\x00\x00\x00\x00\x00\x00\xf0?\x00\x00\x00\x00\x00\x00\xf0?\x00\x00\x00\x00\x00\x00\xf0?\x00\x00\x00\x00\x00\x00\xf0?\x00\x00\x00\x00\x00\x00\xf0?\x00\x00\x00\x00\x00\x00\xf0?\x00\x00\x00\x00\x00\x00\xf0?\x00\x00\x00\x00\x00\x00\xf0?\x00\x00\x00\x00\x00\x00\xf0?\x00\x00\x00\x00\x00\x00\xf0?\xb8\x1e\x85\xebQ\xb8\xbe?\x03\x9d6\xd0i\x03\xcd?O\x1b\xe8\xb4\x81N\xdb?\x11\x11\x11\x11\x11\x11\xe1?\xc6\x92_,\xf9\xc5\xe2?\x9d6\xd0i\x03\x9d\xe6?\x07:m\xa0\xd3\x06\xea?)\\\x8f\xc2\xf5(\xec?q=\n\xd7\xa3p\xed?\xb8\x1e\x85\xebQ\xb8\xee?\xb8\x1e\x85\xebQ\xb8\xee?\x93_,\xf9\xc5\x92\xef?\x93_,\xf9\xc5\x92\xef?\x93_,\xf9\xc5\x92\xef?\x00\x00\x00\x00\x00\x00\xf0?\x00\x00\x00\x00\x00\x00\xf0?\x00\x00\x00\x00\x00\x00\xf0?\x00\x00\x00\x00\x00\x00\xf0?\x00\x00\x00\x00\x00\x00\xf0?\x00\x00\x00\x00\x00\x00\xf0?\x00\x00\x00\x00\x00\x00\xf0?\x00\x00\x00\x00\x00\x00\xf0?\x00\x00\x00\x00\x00\x00\xf0?\x00\x00\x00\x00\x00\x00\xf0?\x00\x00\x00\x00\x00\x00\xf0?\x00\x00\x00\x00\x00\x00\xf0?\x00\x00\x00\x00\x00\x00\xf0?\xe5\x17K~\xb1\xe4\xb7?\xe5\x17K~\xb1\xe4\xb7?\xe5\x17K~\xb1\xe4\xb7?O\x1b\xe8\xb4\x81N\xbb?\xe5\x17K~\xb1\xe4\xb7?{\x14\xaeG\xe1z\xb4?\xe5\x17K~\xb1\xe4\xb7?{\x14\xaeG\xe1z\xb4?\x11\x11\x11\x11\x11\x11\xb1?\x11\x11\x11\x11\x11\x11\xb1?\x11\x11\x11\x11\x11\x11\xb1?{\x14\xaeG\xe1z\xa4?O\x1b\xe8\xb4\x81N\x9b?O\x1b\xe8\xb4\x81N\x9b?O\x1b\xe8\xb4\x81N\x9b?O\x1b\xe8\xb4\x81N\x9b?O\x1b\xe8\xb4\x81N\x8b?O\x1b\xe8\xb4\x81N\x8b?O\x1b\xe8\xb4\x81N\x8b?O\x1b\xe8\xb4\x81N\x9b?{\x14\xaeG\xe1z\xa4?{\x14\xaeG\xe1z\xa4?{\x14\xaeG\xe1z\xa4?{\x14\xaeG\xe1z\xa4?{\x14\xaeG\xe1z\xa4?{\x14\xaeG\xe1z\xa4?{\x14\xaeG\xe1z\xa4?\xe5\x17K~\xb1\xe4\xb7?{\x14\xaeG\xe1z\xb4?\xe5\x17K~\xb1\xe4\xb7?{\x14\xaeG\xe1z\xb4?{\x14\xaeG\xe1z\xb4?{\x14\xaeG\xe1z\xb4?\xe5\x17K~\xb1\xe4\xb7?\x11\x11\x11\x11\x11\x11\xb1?{\x14\xaeG\xe1z\xa4?O\x1b\xe8\xb4\x81N\x9b?O\x1b\xe8\xb4\x81N\x9b?O\x1b\xe8\xb4\x81N\x9b?O\x1b\xe8\xb4\x81N\x9b?O\x1b\xe8\xb4\x81N\x9b?O\x1b\xe8\xb4\x81N\x9b?O\x1b\xe8\xb4\x81N\x9b?O\x1b\xe8\xb4\x81N\x9b?O\x1b\xe8\xb4\x81N\x9b?O\x1b\xe8\xb4\x81N\x9b?O\x1b\xe8\xb4\x81N\x9b?O\x1b\xe8\xb4\x81N\x9b?O\x1b\xe8\xb4\x81N\x9b?O\x1b\xe8\xb4\x81N\x9b?O\x1b\xe8\xb4\x81N\x9b?O\x1b\xe8\xb4\x81N\x9b?O\x1b\xe8\xb4\x81N\x9b?O\x1b\xe8\xb4\x81N\x9b?\xe5\x17K~\xb1\xe4\xb7?\xe5\x17K~\xb1\xe4\xb7?\xe5\x17K~\xb1\xe4\xb7?O\x1b\xe8\xb4\x81N\xbb?\xe5\x17K~\xb1\xe4\xb7?{\x14\xaeG\xe1z\xb4?{\x14\xaeG\xe1z\xb4?O\x1b\xe8\xb4\x81N\xab?O\x1b\xe8\xb4\x81N\xab?{\x14\xaeG\xe1z\xa4?{\x14\xaeG\xe1z\xa4?O\x1b\xe8\xb4\x81N\xab?O\x1b\xe8\xb4\x81N\xab?O\x1b\xe8\xb4\x81N\xab?{\x14\xaeG\xe1z\xa4?{\x14\xaeG\xe1z\xa4?{\x14\xaeG\xe1z\xa4?O\x1b\xe8\xb4\x81N\x9b?O\x1b\xe8\xb4\x81N\x8b?\x00\x00\x00\x00\x00\x00\x00\x00\x00\x00\x00\x00\x00\x00\x00\x00\x00\x00\x00\x00\x00\x00\x00\x00\x00\x00\x00\x00\x00\x00\x00\x00\x00\x00\x00\x00\x00\x00\x00\x00\x00\x00\x00\x00\x00\x00\x00\x00\x00\x00\x00\x00\x00\x00\x00\x00\x00\x00\x00\x00\x00\x00\x00\x00\xe5\x17K~\xb1\xe4\xb7?{\x14\xaeG\xe1z\xb4?\x11\x11\x11\x11\x11\x11\xb1?\x11\x11\x11\x11\x11\x11\xb1?O\x1b\xe8\xb4\x81N\xab?{\x14\xaeG\xe1z\xa4?{\x14\xaeG\xe1z\xa4?O\x1b\xe8\xb4\x81N\x9b?O\x1b\xe8\xb4\x81N\x9b?O\x1b\xe8\xb4\x81N\x8b?\x00\x00\x00\x00\x00\x00\x00\x00\x00\x00\x00\x00\x00\x00\x00\x00\x00\x00\x00\x00\x00\x00\x00\x00\x00\x00\x00\x00\x00\x00\x00\x00\x00\x00\x00\x00\x00\x00\x00\x00\x00\x00\x00\x00\x00\x00\x00\x00\x00\x00\x00\x00\x00\x00\x00\x00\x00\x00\x00\x00\x00\x00\x00\x00\x00\x00\x00\x00\x00\x00\x00\x00\x00\x00\x00\x00\x00\x00\x00\x00\x00\x00\x00\x00\x00\x00\x00\x00\x00\x00\x00\x00\x00\x00\x00\x00\x00\x00\x00\x00\x00\x00\x00\x00\x00\x00\x00\x00\x00\x00\x00\x00\x00\x00\x00\x00\x00\x00\x00\x00\x00\x00\x00\x00\x00\x00\x00\x00\x00\x00\x00\x00\x00\x00\x00\x00\xe5\x17K~\xb1\xe4\xb7?\xb8\x1e\x85\xebQ\xb8\xbe?\xb8\x1e\x85\xebQ\xb8\xbe?\xb8\x1e\x85\xebQ\xb8\xbe?O\x1b\xe8\xb4\x81N\xbb?\xe5\x17K~\xb1\xe4\xb7?{\x14\xaeG\xe1z\xb4?O\x1b\xe8\xb4\x81N\xab?O\x1b\xe8\xb4\x81N\x9b?O\x1b\xe8\xb4\x81N\x8b?O\x1b\xe8\xb4\x81N\x8b?O\x1b\xe8\xb4\x81N\x8b?O\x1b\xe8\xb4\x81N\x8b?\x00\x00\x00\x00\x00\x00\x00\x00\x00\x00\x00\x00\x00\x00\x00\x00\x00\x00\x00\x00\x00\x00\x00\x00\x00\x00\x00\x00\x00\x00\x00\x00\x00\x00\x00\x00\x00\x00\x00\x00\x00\x00\x00\x00\x00\x00\x00\x00\x00\x00\x00\x00\x00\x00\x00\x00\x00\x00\x00\x00\x00\x00\x00\x00\x00\x00\x00\x00\x00\x00\x00\x00\x00\x00\x00\x00\x00\x00\x00\x00\x00\x00\x00\x00\x00\x00\x00\x00\x00\x00\x00\x00\x00\x00\x00\x00\x00\x00\x00\x00\x00\x00\x00\x00\x00\x00\x00\x00\x00\x00\x00\x00\xe5\x17K~\xb1\xe4\xb7?\x11\x11\x11\x11\x11\x11\xc1?\xb8\x1e\x85\xebQ\xb8\xbe?\x11\x11\x11\x11\x11\x11\xc1?\x11\x11\x11\x11\x11\x11\xc1?\xb8\x1e\x85\xebQ\xb8\xbe?\xb8\x1e\x85\xebQ\xb8\xbe?O\x1b\xe8\xb4\x81N\xbb?{\x14\xaeG\xe1z\xb4?O\x1b\xe8\xb4\x81N\x9b?O\x1b\xe8\xb4\x81N\x9b?O\x1b\xe8\xb4\x81N\x9b?O\x1b\xe8\xb4\x81N\x8b?O\x1b\xe8\xb4\x81N\x8b?O\x1b\xe8\xb4\x81N\x8b?O\x1b\xe8\xb4\x81N\x8b?O\x1b\xe8\xb4\x81N\x8b?\x00\x00\x00\x00\x00\x00\x00\x00\x00\x00\x00\x00\x00\x00\x00\x00\x00\x00\x00\x00\x00\x00\x00\x00\x00\x00\x00\x00\x00\x00\x00\x00\x00\x00\x00\x00\x00\x00\x00\x00\x00\x00\x00\x00\x00\x00\x00\x00\x00\x00\x00\x00\x00\x00\x00\x00\x00\x00\x00\x00\x00\x00\x00\x00\x00\x00\x00\x00\x00\x00\x00\x00\x00\x00\x00\x00\x00\x00\x00\x00\xe5\x17K~\xb1\xe4\xb7?\x11\x11\x11\x11\x11\x11\xc1?{\x14\xaeG\xe1z\xc4?0\x96\xfcb\xc9/\xc6?O\x1b\xe8\xb4\x81N\xcb?\xb8\x1e\x85\xebQ\xb8\xce?\xecQ\xb8\x1e\x85\xeb\xd1?7\xd0i\x03\x9d6\xd0?{\x14\xaeG\xe1z\xc4?{\x14\xaeG\xe1z\xa4?O\x1b\xe8\xb4\x81N\x9b?O\x1b\xe8\xb4\x81N\x9b?O\x1b\xe8\xb4\x81N\x8b?O\x1b\xe8\xb4\x81N\x8b?O\x1b\xe8\xb4\x81N\x8b?\x00\x00\x00\x00\x00\x00\x00\x00\x00\x00\x00\x00\x00\x00\x00\x00\x00\x00\x00\x00\x00\x00\x00\x00\x00\x00\x00\x00\x00\x00\x00\x00\x00\x00\x00\x00\x00\x00\x00\x00\x00\x00\x00\x00\x00\x00\x00\x00\x00\x00\x00\x00\x00\x00\x00\x00\x00\x00\x00\x00\x00\x00\x00\x00\x00\x00\x00\x00\x00\x00\x00\x00\x00\x00\x00\x00\x00\x00\x00\x00\x00\x00\x00\x00\x00\x00\x00\x00\x00\x00\x00\x00\x00\x00\x00\x00\xe5\x17K~\xb1\xe4\xb7?\xb8\x1e\x85\xebQ\xb8\xbe?{\x14\xaeG\xe1z\xc4?0\x96\xfcb\xc9/\xc6?O\x1b\xe8\xb4\x81N\xcb?\x11\x11\x11\x11\x11\x11\xd1?\x11\x11\x11\x11\x11\x11\xd1?\xc6\x92_,\xf9\xc5\xd2?UUUUUU\xd5?UUUUUU\xd5?\xe5\x17K~\xb1\xe4\xd7?\x9a\x99\x99\x99\x99\x99\xd9?\xbfX\xf2\x8b%\xbf\xd8?\xbfX\xf2\x8b%\xbf\xd8?\xbfX\xf2\x8b%\xbf\xd8?\x9a\x99\x99\x99\x99\x99\xd9?\xe5\x17K~\xb1\xe4\xd7?\xa0\xd3\x06:m\xa0\xd3?\xa0\xd3\x06:m\xa0\xd3?\xc6\x92_,\xf9\xc5\xd2?\xc6\x92_,\xf9\xc5\xd2?\xc6\x92_,\xf9\xc5\xd2?\x11\x11\x11\x11\x11\x11\xd1?\xecQ\xb8\x1e\x85\xeb\xd1?7\xd0i\x03\x9d6\xd0?\x03\x9d6\xd0i\x03\xcd?\x03\x9d6\xd0i\x03\xcd?\xe5\x17K~\xb1\xe4\xb7?\x11\x11\x11\x11\x11\x11\xc1?{\x14\xaeG\xe1z\xc4?\xe5\x17K~\xb1\xe4\xc7?\x11\x11\x11\x11\x11\x11\xd1?\xa0\xd3\x06:m\xa0\xd3?UUUUUU\xd5?O\x1b\xe8\xb4\x81N\xdb?\x03\x9d6\xd0i\x03\xdd?\x93_,\xf9\xc5\x92\xdf?\x93_,\xf9\xc5\x92\xdf?\xa4p=\n\xd7\xa3\xe0?\x11\x11\x11\x11\x11\x11\xe1?\x11\x11\x11\x11\x11\x11\xe1?\x11\x11\x11\x11\x11\x11\xe1?7\xd0i\x03\x9d6\xe0?7\xd0i\x03\x9d6\xe0?\x93_,\xf9\xc5\x92\xdf?7\xd0i\x03\x9d6\xe0?\x93_,\xf9\xc5\x92\xdf?\x93_,\xf9\xc5\x92\xdf?\x93_,\xf9\xc5\x92\xdf?\x93_,\xf9\xc5\x92\xdf?\x93_,\xf9\xc5\x92\xdf?\xde\xdd\xdd\xdd\xdd\xdd\xdd?\xde\xdd\xdd\xdd\xdd\xdd\xdd?\x03\x9d6\xd0i\x03\xdd?\xe5\x17K~\xb1\xe4\xb7?\xe5\x17K~\xb1\xe4\xc7?\x9a\x99\x99\x99\x99\x99\xc9?\xecQ\xb8\x1e\x85\xeb\xd1?\x9a\x99\x99\x99\x99\x99\xd9?\x11\x11\x11\x11\x11\x11\xe1?Y\xf2\x8b%\xbfX\xe2?{\x14\xaeG\xe1z\xe4?\x9d6\xd0i\x03\x9d\xe6?,\xf9\xc5\x92_,\xe9?t\xda@\xa7\rt\xea?t\xda@\xa7\rt\xea?O\x1b\xe8\xb4\x81N\xeb?O\x1b\xe8\xb4\x81N\xeb?t\xda@\xa7\rt\xea?\x07:m\xa0\xd3\x06\xea?\x07:m\xa0\xd3\x06\xea?\x9a\x99\x99\x99\x99\x99\xe9?,\xf9\xc5\x92_,\xe9?\xbfX\xf2\x8b%\xbf\xe8?\xbfX\xf2\x8b%\xbf\xe8?\xbfX\xf2\x8b%\xbf\xe8?R\xb8\x1e\x85\xebQ\xe8?R\xb8\x1e\x85\xebQ\xe8?R\xb8\x1e\x85\xebQ\xe8?R\xb8\x1e\x85\xebQ\xe8?R\xb8\x1e\x85\xebQ\xe8?\xe5\x17K~\xb1\xe4\xb7?0\x96\xfcb\xc9/\xc6?\x03\x9d6\xd0i\x03\xcd?{\x14\xaeG\xe1z\xd4?\xbfX\xf2\x8b%\xbf\xd8?)\\\x8f\xc2\xf5(\xdc?Y\xf2\x8b%\xbfX\xe2?\x9d6\xd0i\x03\x9d\xe6?R\xb8\x1e\x85\xebQ\xe8?\xe1z\x14\xaeG\xe1\xea?q=\n\xd7\xa3p\xed?\xb8\x1e\x85\xebQ\xb8\xee?\x93_,\xf9\xc5\x92\xef?\x00\x00\x00\x00\x00\x00\xf0?\x00\x00\x00\x00\x00\x00\xf0?\x00\x00\x00\x00\x00\x00\xf0?\x00\x00\x00\x00\x00\x00\xf0?\x00\x00\x00\x00\x00\x00\xf0?\x00\x00\x00\x00\x00\x00\xf0?\x00\x00\x00\x00\x00\x00\xf0?\x00\x00\x00\x00\x00\x00\xf0?\x00\x00\x00\x00\x00\x00\xf0?\x00\x00\x00\x00\x00\x00\xf0?\x00\x00\x00\x00\x00\x00\xf0?\x00\x00\x00\x00\x00\x00\xf0?\x00\x00\x00\x00\x00\x00\xf0?\x00\x00\x00\x00\x00\x00\xf0?\xe5\x17K~\xb1\xe4\xb7?\xe5\x17K~\xb1\xe4\xc7?\xecQ\xb8\x1e\x85\xeb\xd1?0\x96\xfcb\xc9/\xd6?)\\\x8f\xc2\xf5(\xdc?~\xb1\xe4\x17K~\xe1?\xe8\xb4\x81N\x1b\xe8\xe4?,\xf9\xc5\x92_,\xe9?\xe1z\x14\xaeG\xe1\xea?\x03\x9d6\xd0i\x03\xed?&\xbfX\xf2\x8b%\xef?&\xbfX\xf2\x8b%\xef?&\xbfX\xf2\x8b%\xef?\x93_,\xf9\xc5\x92\xef?\x93_,\xf9\xc5\x92\xef?\x93_,\xf9\xc5\x92\xef?\x93_,\xf9\xc5\x92\xef?\x93_,\xf9\xc5\x92\xef?\x93_,\xf9\xc5\x92\xef?\x93_,\xf9\xc5\x92\xef?\x93_,\xf9\xc5\x92\xef?\x93_,\xf9\xc5\x92\xef?\x00\x00\x00\x00\x00\x00\xf0?\x00\x00\x00\x00\x00\x00\xf0?\x00\x00\x00\x00\x00\x00\xf0?\x00\x00\x00\x00\x00\x00\xf0?\x00\x00\x00\x00\x00\x00\xf0?\xe5\x17K~\xb1\xe4\xb7?0\x96\xfcb\xc9/\xc6?7\xd0i\x03\x9d6\xd0?\xa0\xd3\x06:m\xa0\xd3?\xe5\x17K~\xb1\xe4\xd7?\xb8\x1e\x85\xebQ\xb8\xde?Y\xf2\x8b%\xbfX\xe2?\xc6\x92_,\xf9\xc5\xe2?\x9d6\xd0i\x03\x9d\xe6?\x9a\x99\x99\x99\x99\x99\xe9?\xe1z\x14\xaeG\xe1\xea?\xbc\xbb\xbb\xbb\xbb\xbb\xeb?\x96\xfcb\xc9/\x96\xec?q=\n\xd7\xa3p\xed?q=\n\xd7\xa3p\xed?\xde\xdd\xdd\xdd\xdd\xdd\xed?\xde\xdd\xdd\xdd\xdd\xdd\xed?\xb8\x1e\x85\xebQ\xb8\xee?&\xbfX\xf2\x8b%\xef?&\xbfX\xf2\x8b%\xef?\x93_,\xf9\xc5\x92\xef?\x93_,\xf9\xc5\x92\xef?\x93_,\xf9\xc5\x92\xef?\x93_,\xf9\xc5\x92\xef?\x93_,\xf9\xc5\x92\xef?\x93_,\xf9\xc5\x92\xef?\x00\x00\x00\x00\x00\x00\xf0?\xe8\xb4\x81N\x1b\xe8\xe4?UUUUUU\xe5?UUUUUU\xe5?\xc3\xf5(\\\x8f\xc2\xe5?wwwwww\xe7?wwwwww\xe7?wwwwww\xe7?wwwwww\xe7?R\xb8\x1e\x85\xebQ\xe8?R\xb8\x1e\x85\xebQ\xe8?R\xb8\x1e\x85\xebQ\xe8?\xbfX\xf2\x8b%\xbf\xe8?\xbfX\xf2\x8b%\xbf\xe8?\xbfX\xf2\x8b%\xbf\xe8?\xbfX\xf2\x8b%\xbf\xe8?\xbfX\xf2\x8b%\xbf\xe8?\xbfX\xf2\x8b%\xbf\xe8?\xbfX\xf2\x8b%\xbf\xe8?\xbfX\xf2\x8b%\xbf\xe8?\xbfX\xf2\x8b%\xbf\xe8?\xbfX\xf2\x8b%\xbf\xe8?\xbfX\xf2\x8b%\xbf\xe8?\xbfX\xf2\x8b%\xbf\xe8?,\xf9\xc5\x92_,\xe9?,\xf9\xc5\x92_,\xe9?,\xf9\xc5\x92_,\xe9?,\xf9\xc5\x92_,\xe9?\xe8\xb4\x81N\x1b\xe8\xe4?UUUUUU\xe5?\xc3\xf5(\\\x8f\xc2\xe5?wwwwww\xe7?\xe5\x17K~\xb1\xe4\xe7?R\xb8\x1e\x85\xebQ\xe8?R\xb8\x1e\x85\xebQ\xe8?R\xb8\x1e\x85\xebQ\xe8?R\xb8\x1e\x85\xebQ\xe8?,\xf9\xc5\x92_,\xe9?,\xf9\xc5\x92_,\xe9?,\xf9\xc5\x92_,\xe9?,\xf9\xc5\x92_,\xe9?,\xf9\xc5\x92_,\xe9?,\xf9\xc5\x92_,\xe9?,\xf9\xc5\x92_,\xe9?,\xf9\xc5\x92_,\xe9?,\xf9\xc5\x92_,\xe9?,\xf9\xc5\x92_,\xe9?,\xf9\xc5\x92_,\xe9?,\xf9\xc5\x92_,\xe9?,\xf9\xc5\x92_,\xe9?,\xf9\xc5\x92_,\xe9?,\xf9\xc5\x92_,\xe9?,\xf9\xc5\x92_,\xe9?,\xf9\xc5\x92_,\xe9?\x9a\x99\x99\x99\x99\x99\xe9?\xe8\xb4\x81N\x1b\xe8\xe4?UUUUUU\xe5?\xc3\xf5(\\\x8f\xc2\xe5?\xc3\xf5(\\\x8f\xc2\xe5?0\x96\xfcb\xc9/\xe6?\x9d6\xd0i\x03\x9d\xe6?\n\xd7\xa3p=\n\xe7?R\xb8\x1e\x85\xebQ\xe8?R\xb8\x1e\x85\xebQ\xe8?R\xb8\x1e\x85\xebQ\xe8?R\xb8\x1e\x85\xebQ\xe8?,\xf9\xc5\x92_,\xe9?,\xf9\xc5\x92_,\xe9?,\xf9\xc5\x92_,\xe9?,\xf9\xc5\x92_,\xe9?\x9a\x99\x99\x99\x99\x99\xe9?\x9a\x99\x99\x99\x99\x99\xe9?\x07:m\xa0\xd3\x06\xea?\x07:m\xa0\xd3\x06\xea?\x07:m\xa0\xd3\x06\xea?\x07:m\xa0\xd3\x06\xea?\x07:m\xa0\xd3\x06\xea?\x07:m\xa0\xd3\x06\xea?\x07:m\xa0\xd3\x06\xea?\x07:m\xa0\xd3\x06\xea?\x07:m\xa0\xd3\x06\xea?\x07:m\xa0\xd3\x06\xea?\xe8\xb4\x81N\x1b\xe8\xe4?\xc3\xf5(\\\x8f\xc2\xe5?wwwwww\xe7?,\xf9\xc5\x92_,\xe9?,\xf9\xc5\x92_,\xe9?\x07:m\xa0\xd3\x06\xea?\xbc\xbb\xbb\xbb\xbb\xbb\xeb?\xbc\xbb\xbb\xbb\xbb\xbb\xeb?)\\\x8f\xc2\xf5(\xec?\x96\xfcb\xc9/\x96\xec?\x96\xfcb\xc9/\x96\xec?\x96\xfcb\xc9/\x96\xec?\x03\x9d6\xd0i\x03\xed?\x03\x9d6\xd0i\x03\xed?\x03\x9d6\xd0i\x03\xed?\xde\xdd\xdd\xdd\xdd\xdd\xed?\xde\xdd\xdd\xdd\xdd\xdd\xed?K~\xb1\xe4\x17K\xee?K~\xb1\xe4\x17K\xee?K~\xb1\xe4\x17K\xee?K~\xb1\xe4\x17K\xee?\xb8\x1e\x85\xebQ\xb8\xee?\xb8\x1e\x85\xebQ\xb8\xee?\xb8\x1e\x85\xebQ\xb8\xee?\xb8\x1e\x85\xebQ\xb8\xee?&\xbfX\xf2\x8b%\xef?&\xbfX\xf2\x8b%\xef?\xe8\xb4\x81N\x1b\xe8\xe4?\xe8\xb4\x81N\x1b\xe8\xe4?\n\xd7\xa3p=\n\xe7?\xe5\x17K~\xb1\xe4\xe7?\xbfX\xf2\x8b%\xbf\xe8?\xbfX\xf2\x8b%\xbf\xe8?\x9a\x99\x99\x99\x99\x99\xe9?\x07:m\xa0\xd3\x06\xea?t\xda@\xa7\rt\xea?t\xda@\xa7\rt\xea?O\x1b\xe8\xb4\x81N\xeb?\xbc\xbb\xbb\xbb\xbb\xbb\xeb?\xbc\xbb\xbb\xbb\xbb\xbb\xeb?)\\\x8f\xc2\xf5(\xec?)\\\x8f\xc2\xf5(\xec?\x96\xfcb\xc9/\x96\xec?\x03\x9d6\xd0i\x03\xed?q=\n\xd7\xa3p\xed?\xb8\x1e\x85\xebQ\xb8\xee?&\xbfX\xf2\x8b%\xef?&\xbfX\xf2\x8b%\xef?&\xbfX\xf2\x8b%\xef?&\xbfX\xf2\x8b%\xef?\x93_,\xf9\xc5\x92\xef?\x93_,\xf9\xc5\x92\xef?\x93_,\xf9\xc5\x92\xef?\x93_,\xf9\xc5\x92\xef?\xe8\xb4\x81N\x1b\xe8\xe4?UUUUUU\xe5?\x9d6\xd0i\x03\x9d\xe6?\xe5\x17K~\xb1\xe4\xe7?\xbfX\xf2\x8b%\xbf\xe8?\xbfX\xf2\x8b%\xbf\xe8?,\xf9\xc5\x92_,\xe9?\xe1z\x14\xaeG\xe1\xea?O\x1b\xe8\xb4\x81N\xeb?\xbc\xbb\xbb\xbb\xbb\xbb\xeb?)\\\x8f\xc2\xf5(\xec?\x03\x9d6\xd0i\x03\xed?q=\n\xd7\xa3p\xed?q=\n\xd7\xa3p\xed?q=\n\xd7\xa3p\xed?\xde\xdd\xdd\xdd\xdd\xdd\xed?\xde\xdd\xdd\xdd\xdd\xdd\xed?q=\n\xd7\xa3p\xed?q=\n\xd7\xa3p\xed?q=\n\xd7\xa3p\xed?q=\n\xd7\xa3p\xed?\xde\xdd\xdd\xdd\xdd\xdd\xed?\xde\xdd\xdd\xdd\xdd\xdd\xed?\xde\xdd\xdd\xdd\xdd\xdd\xed?K~\xb1\xe4\x17K\xee?\xb8\x1e\x85\xebQ\xb8\xee?&\xbfX\xf2\x8b%\xef?\xe8\xb4\x81N\x1b\xe8\xe4?\x9d6\xd0i\x03\x9d\xe6?\xe1z\x14\xaeG\xe1\xea?)\\\x8f\xc2\xf5(\xec?\xde\xdd\xdd\xdd\xdd\xdd\xed?\xde\xdd\xdd\xdd\xdd\xdd\xed?\x00\x00\x00\x00\x00\x00\xf0?\x00\x00\x00\x00\x00\x00\xf0?\x00\x00\x00\x00\x00\x00\xf0?\x00\x00\x00\x00\x00\x00\xf0?\x00\x00\x00\x00\x00\x00\xf0?\x00\x00\x00\x00\x00\x00\xf0?\x00\x00\x00\x00\x00\x00\xf0?\x00\x00\x00\x00\x00\x00\xf0?\x00\x00\x00\x00\x00\x00\xf0?\x00\x00\x00\x00\x00\x00\xf0?\x00\x00\x00\x00\x00\x00\xf0?\x00\x00\x00\x00\x00\x00\xf0?\x00\x00\x00\x00\x00\x00\xf0?\x00\x00\x00\x00\x00\x00\xf0?\x00\x00\x00\x00\x00\x00\xf0?\x00\x00\x00\x00\x00\x00\xf0?\x00\x00\x00\x00\x00\x00\xf0?\x00\x00\x00\x00\x00\x00\xf0?\x00\x00\x00\x00\x00\x00\xf0?\x00\x00\x00\x00\x00\x00\xf0?\x00\x00\x00\x00\x00\x00\xf0?\xe8\xb4\x81N\x1b\xe8\xe4?\xc3\xf5(\\\x8f\xc2\xe5?\xbfX\xf2\x8b%\xbf\xe8?\xbc\xbb\xbb\xbb\xbb\xbb\xeb?)\\\x8f\xc2\xf5(\xec?\x03\x9d6\xd0i\x03\xed?q=\n\xd7\xa3p\xed?\xde\xdd\xdd\xdd\xdd\xdd\xed?&\xbfX\xf2\x8b%\xef?\x93_,\xf9\xc5\x92\xef?\x00\x00\x00\x00\x00\x00\xf0?\x00\x00\x00\x00\x00\x00\xf0?\x00\x00\x00\x00\x00\x00\xf0?\x00\x00\x00\x00\x00\x00\xf0?\x00\x00\x00\x00\x00\x00\xf0?\x00\x00\x00\x00\x00\x00\xf0?\x00\x00\x00\x00\x00\x00\xf0?\x00\x00\x00\x00\x00\x00\xf0?\x00\x00\x00\x00\x00\x00\xf0?\x00\x00\x00\x00\x00\x00\xf0?\x00\x00\x00\x00\x00\x00\xf0?\x00\x00\x00\x00\x00\x00\xf0?\x00\x00\x00\x00\x00\x00\xf0?\x00\x00\x00\x00\x00\x00\xf0?\x00\x00\x00\x00\x00\x00\xf0?\x00\x00\x00\x00\x00\x00\xf0?\x00\x00\x00\x00\x00\x00\xf0?\xe8\xb4\x81N\x1b\xe8\xe4?\x9d6\xd0i\x03\x9d\xe6?\xbfX\xf2\x8b%\xbf\xe8?\x96\xfcb\xc9/\x96\xec?\x03\x9d6\xd0i\x03\xed?q=\n\xd7\xa3p\xed?\xb8\x1e\x85\xebQ\xb8\xee?&\xbfX\xf2\x8b%\xef?\x93_,\xf9\xc5\x92\xef?\x00\x00\x00\x00\x00\x00\xf0?\x00\x00\x00\x00\x00\x00\xf0?\x00\x00\x00\x00\x00\x00\xf0?\x00\x00\x00\x00\x00\x00\xf0?\x00\x00\x00\x00\x00\x00\xf0?\x00\x00\x00\x00\x00\x00\xf0?\x00\x00\x00\x00\x00\x00\xf0?\x00\x00\x00\x00\x00\x00\xf0?\x00\x00\x00\x00\x00\x00\xf0?\x00\x00\x00\x00\x00\x00\xf0?\x00\x00\x00\x00\x00\x00\xf0?\x00\x00\x00\x00\x00\x00\xf0?\x00\x00\x00\x00\x00\x00\xf0?\x00\x00\x00\x00\x00\x00\xf0?\x00\x00\x00\x00\x00\x00\xf0?\x00\x00\x00\x00\x00\x00\xf0?\x00\x00\x00\x00\x00\x00\xf0?\x00\x00\x00\x00\x00\x00\xf0?\xe8\xb4\x81N\x1b\xe8\xe4?\xbfX\xf2\x8b%\xbf\xe8?\x96\xfcb\xc9/\x96\xec?\xde\xdd\xdd\xdd\xdd\xdd\xed?\xb8\x1e\x85\xebQ\xb8\xee?\x93_,\xf9\xc5\x92\xef?\x00\x00\x00\x00\x00\x00\xf0?\x00\x00\x00\x00\x00\x00\xf0?\x00\x00\x00\x00\x00\x00\xf0?\x00\x00\x00\x00\x00\x00\xf0?\x00\x00\x00\x00\x00\x00\xf0?\x00\x00\x00\x00\x00\x00\xf0?\x00\x00\x00\x00\x00\x00\xf0?\x00\x00\x00\x00\x00\x00\xf0?\x00\x00\x00\x00\x00\x00\xf0?\x00\x00\x00\x00\x00\x00\xf0?\x00\x00\x00\x00\x00\x00\xf0?\x00\x00\x00\x00\x00\x00\xf0?\x00\x00\x00\x00\x00\x00\xf0?\x00\x00\x00\x00\x00\x00\xf0?\x00\x00\x00\x00\x00\x00\xf0?\x00\x00\x00\x00\x00\x00\xf0?\x00\x00\x00\x00\x00\x00\xf0?\x00\x00\x00\x00\x00\x00\xf0?\x00\x00\x00\x00\x00\x00\xf0?\x00\x00\x00\x00\x00\x00\xf0?\x00\x00\x00\x00\x00\x00\xf0?\xe8\xb4\x81N\x1b\xe8\xe4?\xe5\x17K~\xb1\xe4\xe7?O\x1b\xe8\xb4\x81N\xeb?q=\n\xd7\xa3p\xed?\xde\xdd\xdd\xdd\xdd\xdd\xed?&\xbfX\xf2\x8b%\xef?&\xbfX\xf2\x8b%\xef?\x00\x00\x00\x00\x00\x00\xf0?\x00\x00\x00\x00\x00\x00\xf0?\x00\x00\x00\x00\x00\x00\xf0?\x00\x00\x00\x00\x00\x00\xf0?\x00\x00\x00\x00\x00\x00\xf0?\x00\x00\x00\x00\x00\x00\xf0?\x00\x00\x00\x00\x00\x00\xf0?\x00\x00\x00\x00\x00\x00\xf0?\x00\x00\x00\x00\x00\x00\xf0?\x00\x00\x00\x00\x00\x00\xf0?\x00\x00\x00\x00\x00\x00\xf0?\x00\x00\x00\x00\x00\x00\xf0?\x00\x00\x00\x00\x00\x00\xf0?\x00\x00\x00\x00\x00\x00\xf0?\x00\x00\x00\x00\x00\x00\xf0?\x00\x00\x00\x00\x00\x00\xf0?\x00\x00\x00\x00\x00\x00\xf0?\x00\x00\x00\x00\x00\x00\xf0?\x00\x00\x00\x00\x00\x00\xf0?\x00\x00\x00\x00\x00\x00\xf0?\xe8\xb4\x81N\x1b\xe8\xe4?R\xb8\x1e\x85\xebQ\xe8?\x96\xfcb\xc9/\x96\xec?K~\xb1\xe4\x17K\xee?\xb8\x1e\x85\xebQ\xb8\xee?\x00\x00\x00\x00\x00\x00\xf0?\x00\x00\x00\x00\x00\x00\xf0?\x00\x00\x00\x00\x00\x00\xf0?\x00\x00\x00\x00\x00\x00\xf0?\x00\x00\x00\x00\x00\x00\xf0?\x00\x00\x00\x00\x00\x00\xf0?\x00\x00\x00\x00\x00\x00\xf0?\x00\x00\x00\x00\x00\x00\xf0?\x00\x00\x00\x00\x00\x00\xf0?\x00\x00\x00\x00\x00\x00\xf0?\x00\x00\x00\x00\x00\x00\xf0?\x00\x00\x00\x00\x00\x00\xf0?\x00\x00\x00\x00\x00\x00\xf0?\x00\x00\x00\x00\x00\x00\xf0?\x00\x00\x00\x00\x00\x00\xf0?\x00\x00\x00\x00\x00\x00\xf0?\x00\x00\x00\x00\x00\x00\xf0?\x00\x00\x00\x00\x00\x00\xf0?\x00\x00\x00\x00\x00\x00\xf0?\x00\x00\x00\x00\x00\x00\xf0?\x00\x00\x00\x00\x00\x00\xf0?\x00\x00\x00\x00\x00\x00\xf0?\xe8\xb4\x81N\x1b\xe8\xe4?R\xb8\x1e\x85\xebQ\xe8?\x96\xfcb\xc9/\x96\xec?q=\n\xd7\xa3p\xed?\xb8\x1e\x85\xebQ\xb8\xee?\xb8\x1e\x85\xebQ\xb8\xee?\x93_,\xf9\xc5\x92\xef?\x00\x00\x00\x00\x00\x00\xf0?\x00\x00\x00\x00\x00\x00\xf0?\x00\x00\x00\x00\x00\x00\xf0?\x00\x00\x00\x00\x00\x00\xf0?\x00\x00\x00\x00\x00\x00\xf0?\x00\x00\x00\x00\x00\x00\xf0?\x00\x00\x00\x00\x00\x00\xf0?\x00\x00\x00\x00\x00\x00\xf0?\x00\x00\x00\x00\x00\x00\xf0?\x00\x00\x00\x00\x00\x00\xf0?\x00\x00\x00\x00\x00\x00\xf0?\x00\x00\x00\x00\x00\x00\xf0?\x00\x00\x00\x00\x00\x00\xf0?\x00\x00\x00\x00\x00\x00\xf0?\x00\x00\x00\x00\x00\x00\xf0?\x00\x00\x00\x00\x00\x00\xf0?\x00\x00\x00\x00\x00\x00\xf0?\x00\x00\x00\x00\x00\x00\xf0?\x00\x00\x00\x00\x00\x00\xf0?\x00\x00\x00\x00\x00\x00\xf0?\xc6\x92_,\xf9\xc5\xd2?\xc6\x92_,\xf9\xc5\xd2?\xc6\x92_,\xf9\xc5\xd2?\xc6\x92_,\xf9\xc5\xd2?\xc6\x92_,\xf9\xc5\xd2?\xa0\xd3\x06:m\xa0\xd3?\xc6\x92_,\xf9\xc5\xd2?\xc6\x92_,\xf9\xc5\xd2?\xc6\x92_,\xf9\xc5\xd2?\xc6\x92_,\xf9\xc5\xd2?\xa0\xd3\x06:m\xa0\xd3?\xa0\xd3\x06:m\xa0\xd3?\xa0\xd3\x06:m\xa0\xd3?\xa0\xd3\x06:m\xa0\xd3?\xa0\xd3\x06:m\xa0\xd3?\xa0\xd3\x06:m\xa0\xd3?\xa0\xd3\x06:m\xa0\xd3?\xa0\xd3\x06:m\xa0\xd3?\xa0\xd3\x06:m\xa0\xd3?\xa0\xd3\x06:m\xa0\xd3?\xa0\xd3\x06:m\xa0\xd3?{\x14\xaeG\xe1z\xd4?{\x14\xaeG\xe1z\xd4?\xa0\xd3\x06:m\xa0\xd3?\xa0\xd3\x06:m\xa0\xd3?\xa0\xd3\x06:m\xa0\xd3?\xa0\xd3\x06:m\xa0\xd3?\xc6\x92_,\xf9\xc5\xd2?\xc6\x92_,\xf9\xc5\xd2?\xc6\x92_,\xf9\xc5\xd2?\xc6\x92_,\xf9\xc5\xd2?\xecQ\xb8\x1e\x85\xeb\xd1?\xc6\x92_,\xf9\xc5\xd2?\xc6\x92_,\xf9\xc5\xd2?\xa0\xd3\x06:m\xa0\xd3?\xa0\xd3\x06:m\xa0\xd3?{\x14\xaeG\xe1z\xd4?\xa0\xd3\x06:m\xa0\xd3?\xa0\xd3\x06:m\xa0\xd3?\xa0\xd3\x06:m\xa0\xd3?\xc6\x92_,\xf9\xc5\xd2?\xc6\x92_,\xf9\xc5\xd2?\xc6\x92_,\xf9\xc5\xd2?\xc6\x92_,\xf9\xc5\xd2?\x11\x11\x11\x11\x11\x11\xd1?\xecQ\xb8\x1e\x85\xeb\xd1?\xecQ\xb8\x1e\x85\xeb\xd1?\xecQ\xb8\x1e\x85\xeb\xd1?\x11\x11\x11\x11\x11\x11\xd1?\xecQ\xb8\x1e\x85\xeb\xd1?\xecQ\xb8\x1e\x85\xeb\xd1?\xecQ\xb8\x1e\x85\xeb\xd1?\x11\x11\x11\x11\x11\x11\xd1?\x11\x11\x11\x11\x11\x11\xd1?\xc6\x92_,\xf9\xc5\xd2?\xa0\xd3\x06:m\xa0\xd3?0\x96\xfcb\xc9/\xd6?0\x96\xfcb\xc9/\xd6?0\x96\xfcb\xc9/\xd6?\xe5\x17K~\xb1\xe4\xd7?\xbfX\xf2\x8b%\xbf\xd8?\xbfX\xf2\x8b%\xbf\xd8?\xbfX\xf2\x8b%\xbf\xd8?\xbfX\xf2\x8b%\xbf\xd8?\xbfX\xf2\x8b%\xbf\xd8?\xbfX\xf2\x8b%\xbf\xd8?\xbfX\xf2\x8b%\xbf\xd8?\xe5\x17K~\xb1\xe4\xd7?\xe5\x17K~\xb1\xe4\xd7?\xe5\x17K~\xb1\xe4\xd7?\xe5\x17K~\xb1\xe4\xd7?\xbfX\xf2\x8b%\xbf\xd8?\xbfX\xf2\x8b%\xbf\xd8?\xbfX\xf2\x8b%\xbf\xd8?\xbfX\xf2\x8b%\xbf\xd8?\xbfX\xf2\x8b%\xbf\xd8?\xbfX\xf2\x8b%\xbf\xd8?\xbfX\xf2\x8b%\xbf\xd8?\x9a\x99\x99\x99\x99\x99\xd9?t\xda@\xa7\rt\xda?t\xda@\xa7\rt\xda?\xc6\x92_,\xf9\xc5\xd2?\xa0\xd3\x06:m\xa0\xd3?UUUUUU\xd5?UUUUUU\xd5?\n\xd7\xa3p=\n\xd7?\n\xd7\xa3p=\n\xd7?\xe5\x17K~\xb1\xe4\xd7?\xe5\x17K~\xb1\xe4\xd7?\xe5\x17K~\xb1\xe4\xd7?\xe5\x17K~\xb1\xe4\xd7?\n\xd7\xa3p=\n\xd7?\n\xd7\xa3p=\n\xd7?\n\xd7\xa3p=\n\xd7?0\x96\xfcb\xc9/\xd6?UUUUUU\xd5?UUUUUU\xd5?UUUUUU\xd5?UUUUUU\xd5?UUUUUU\xd5?UUUUUU\xd5?{\x14\xaeG\xe1z\xd4?{\x14\xaeG\xe1z\xd4?{\x14\xaeG\xe1z\xd4?\xc6\x92_,\xf9\xc5\xd2?\xc6\x92_,\xf9\xc5\xd2?\xc6\x92_,\xf9\xc5\xd2?\x11\x11\x11\x11\x11\x11\xd1?\xc6\x92_,\xf9\xc5\xd2?UUUUUU\xd5?\xbfX\xf2\x8b%\xbf\xd8?\xbfX\xf2\x8b%\xbf\xd8?\xbfX\xf2\x8b%\xbf\xd8?\xbfX\xf2\x8b%\xbf\xd8?\xbfX\xf2\x8b%\xbf\xd8?\xbfX\xf2\x8b%\xbf\xd8?t\xda@\xa7\rt\xda?t\xda@\xa7\rt\xda?t\xda@\xa7\rt\xda?)\\\x8f\xc2\xf5(\xdc?\xde\xdd\xdd\xdd\xdd\xdd\xdd?\xb8\x1e\x85\xebQ\xb8\xde?\xb8\x1e\x85\xebQ\xb8\xde?\xa4p=\n\xd7\xa3\xe0?\xa4p=\n\xd7\xa3\xe0?\xa4p=\n\xd7\xa3\xe0?\xa4p=\n\xd7\xa3\xe0?\x11\x11\x11\x11\x11\x11\xe1?\x11\x11\x11\x11\x11\x11\xe1?\xa4p=\n\xd7\xa3\xe0?\x11\x11\x11\x11\x11\x11\xe1?\x11\x11\x11\x11\x11\x11\xe1?\x11\x11\x11\x11\x11\x11\xe1?\x11\x11\x11\x11\x11\x11\xe1?\x11\x11\x11\x11\x11\x11\xe1?\xc6\x92_,\xf9\xc5\xd2?0\x96\xfcb\xc9/\xd6?\xe5\x17K~\xb1\xe4\xd7?\xe5\x17K~\xb1\xe4\xd7?\xe5\x17K~\xb1\xe4\xd7?\xe5\x17K~\xb1\xe4\xd7?\xbfX\xf2\x8b%\xbf\xd8?)\\\x8f\xc2\xf5(\xdc?)\\\x8f\xc2\xf5(\xdc?\x03\x9d6\xd0i\x03\xdd?\x03\x9d6\xd0i\x03\xdd?\xde\xdd\xdd\xdd\xdd\xdd\xdd?\x93_,\xf9\xc5\x92\xdf?\x11\x11\x11\x11\x11\x11\xe1?~\xb1\xe4\x17K~\xe1?\xecQ\xb8\x1e\x85\xeb\xe1?\xecQ\xb8\x1e\x85\xeb\xe1?\xecQ\xb8\x1e\x85\xeb\xe1?\xecQ\xb8\x1e\x85\xeb\xe1?\xecQ\xb8\x1e\x85\xeb\xe1?~\xb1\xe4\x17K~\xe1?~\xb1\xe4\x17K~\xe1?~\xb1\xe4\x17K~\xe1?~\xb1\xe4\x17K~\xe1?~\xb1\xe4\x17K~\xe1?~\xb1\xe4\x17K~\xe1?~\xb1\xe4\x17K~\xe1?\xc6\x92_,\xf9\xc5\xd2?\n\xd7\xa3p=\n\xd7?\xe5\x17K~\xb1\xe4\xd7?\xe5\x17K~\xb1\xe4\xd7?\x9a\x99\x99\x99\x99\x99\xd9?t\xda@\xa7\rt\xda?O\x1b\xe8\xb4\x81N\xdb?O\x1b\xe8\xb4\x81N\xdb?)\\\x8f\xc2\xf5(\xdc?)\\\x8f\xc2\xf5(\xdc?)\\\x8f\xc2\xf5(\xdc?\x03\x9d6\xd0i\x03\xdd?\xde\xdd\xdd\xdd\xdd\xdd\xdd?\xde\xdd\xdd\xdd\xdd\xdd\xdd?\xde\xdd\xdd\xdd\xdd\xdd\xdd?\xde\xdd\xdd\xdd\xdd\xdd\xdd?\x03\x9d6\xd0i\x03\xdd?\x03\x9d6\xd0i\x03\xdd?\x03\x9d6\xd0i\x03\xdd?\x03\x9d6\xd0i\x03\xdd?\x03\x9d6\xd0i\x03\xdd?\x03\x9d6\xd0i\x03\xdd?\x03\x9d6\xd0i\x03\xdd?\x03\x9d6\xd0i\x03\xdd?\x03\x9d6\xd0i\x03\xdd?\x03\x9d6\xd0i\x03\xdd?)\\\x8f\xc2\xf5(\xdc?\xc6\x92_,\xf9\xc5\xd2?\xe5\x17K~\xb1\xe4\xd7?t\xda@\xa7\rt\xda?O\x1b\xe8\xb4\x81N\xdb?\x03\x9d6\xd0i\x03\xdd?\xb8\x1e\x85\xebQ\xb8\xde?\xa4p=\n\xd7\xa3\xe0?\xecQ\xb8\x1e\x85\xeb\xe1?\xa0\xd3\x06:m\xa0\xe3?{\x14\xaeG\xe1z\xe4?UUUUUU\xe5?0\x96\xfcb\xc9/\xe6?0\x96\xfcb\xc9/\xe6?0\x96\xfcb\xc9/\xe6?\x9d6\xd0i\x03\x9d\xe6?\n\xd7\xa3p=\n\xe7?\xe5\x17K~\xb1\xe4\xe7?R\xb8\x1e\x85\xebQ\xe8?R\xb8\x1e\x85\xebQ\xe8?\xbfX\xf2\x8b%\xbf\xe8?,\xf9\xc5\x92_,\xe9?,\xf9\xc5\x92_,\xe9?,\xf9\xc5\x92_,\xe9?\x9a\x99\x99\x99\x99\x99\xe9?\x9a\x99\x99\x99\x99\x99\xe9?\x07:m\xa0\xd3\x06\xea?\x07:m\xa0\xd3\x06\xea?\xc6\x92_,\xf9\xc5\xd2?\xe5\x17K~\xb1\xe4\xd7?O\x1b\xe8\xb4\x81N\xdb?\x03\x9d6\xd0i\x03\xdd?\x93_,\xf9\xc5\x92\xdf?\xecQ\xb8\x1e\x85\xeb\xe1?Y\xf2\x8b%\xbfX\xe2?\xa0\xd3\x06:m\xa0\xe3?\xe8\xb4\x81N\x1b\xe8\xe4?\xc3\xf5(\\\x8f\xc2\xe5?\x9d6\xd0i\x03\x9d\xe6?R\xb8\x1e\x85\xebQ\xe8?\xbfX\xf2\x8b%\xbf\xe8?\xbfX\xf2\x8b%\xbf\xe8?,\xf9\xc5\x92_,\xe9?,\xf9\xc5\x92_,\xe9?\x9a\x99\x99\x99\x99\x99\xe9?\x07:m\xa0\xd3\x06\xea?\x07:m\xa0\xd3\x06\xea?O\x1b\xe8\xb4\x81N\xeb?O\x1b\xe8\xb4\x81N\xeb?)\\\x8f\xc2\xf5(\xec?)\\\x8f\xc2\xf5(\xec?\x96\xfcb\xc9/\x96\xec?\x03\x9d6\xd0i\x03\xed?\x03\x9d6\xd0i\x03\xed?\x03\x9d6\xd0i\x03\xed?\xc6\x92_,\xf9\xc5\xd2?t\xda@\xa7\rt\xda?\xb8\x1e\x85\xebQ\xb8\xde?\x11\x11\x11\x11\x11\x11\xe1?333333\xe3?\x0et\xda@\xa7\r\xe4?UUUUUU\xe5?\n\xd7\xa3p=\n\xe7?R\xb8\x1e\x85\xebQ\xe8?\xbfX\xf2\x8b%\xbf\xe8?,\xf9\xc5\x92_,\xe9?\x9a\x99\x99\x99\x99\x99\xe9?\xbc\xbb\xbb\xbb\xbb\xbb\xeb?)\\\x8f\xc2\xf5(\xec?\x03\x9d6\xd0i\x03\xed?\x03\x9d6\xd0i\x03\xed?\xde\xdd\xdd\xdd\xdd\xdd\xed?\xb8\x1e\x85\xebQ\xb8\xee?\xb8\x1e\x85\xebQ\xb8\xee?K~\xb1\xe4\x17K\xee?K~\xb1\xe4\x17K\xee?K~\xb1\xe4\x17K\xee?K~\xb1\xe4\x17K\xee?K~\xb1\xe4\x17K\xee?\xb8\x1e\x85\xebQ\xb8\xee?\xb8\x1e\x85\xebQ\xb8\xee?\xb8\x1e\x85\xebQ\xb8\xee?\xc6\x92_,\xf9\xc5\xd2?O\x1b\xe8\xb4\x81N\xdb?\xa4p=\n\xd7\xa3\xe0?\xc6\x92_,\xf9\xc5\xe2?\xe8\xb4\x81N\x1b\xe8\xe4?\n\xd7\xa3p=\n\xe7?\xe5\x17K~\xb1\xe4\xe7?,\xf9\xc5\x92_,\xe9?\xe1z\x14\xaeG\xe1\xea?)\\\x8f\xc2\xf5(\xec?q=\n\xd7\xa3p\xed?K~\xb1\xe4\x17K\xee?\xb8\x1e\x85\xebQ\xb8\xee?\xb8\x1e\x85\xebQ\xb8\xee?&\xbfX\xf2\x8b%\xef?&\xbfX\xf2\x8b%\xef?&\xbfX\xf2\x8b%\xef?&\xbfX\xf2\x8b%\xef?&\xbfX\xf2\x8b%\xef?&\xbfX\xf2\x8b%\xef?&\xbfX\xf2\x8b%\xef?&\xbfX\xf2\x8b%\xef?&\xbfX\xf2\x8b%\xef?\x93_,\xf9\xc5\x92\xef?\x93_,\xf9\xc5\x92\xef?\x93_,\xf9\xc5\x92\xef?\x00\x00\x00\x00\x00\x00\xf0?\xc6\x92_,\xf9\xc5\xd2?\x03\x9d6\xd0i\x03\xdd?~\xb1\xe4\x17K~\xe1?\xa0\xd3\x06:m\xa0\xe3?\xc3\xf5(\\\x8f\xc2\xe5?\n\xd7\xa3p=\n\xe7?,\xf9\xc5\x92_,\xe9?\xe1z\x14\xaeG\xe1\xea?)\\\x8f\xc2\xf5(\xec?)\\\x8f\xc2\xf5(\xec?\x03\x9d6\xd0i\x03\xed?K~\xb1\xe4\x17K\xee?K~\xb1\xe4\x17K\xee?&\xbfX\xf2\x8b%\xef?&\xbfX\xf2\x8b%\xef?&\xbfX\xf2\x8b%\xef?&\xbfX\xf2\x8b%\xef?&\xbfX\xf2\x8b%\xef?&\xbfX\xf2\x8b%\xef?&\xbfX\xf2\x8b%\xef?\x00\x00\x00\x00\x00\x00\xf0?\x00\x00\x00\x00\x00\x00\xf0?\x00\x00\x00\x00\x00\x00\xf0?\x00\x00\x00\x00\x00\x00\xf0?\x00\x00\x00\x00\x00\x00\xf0?\x00\x00\x00\x00\x00\x00\xf0?\x00\x00\x00\x00\x00\x00\xf0?\xc6\x92_,\xf9\xc5\xd2?\xb8\x1e\x85\xebQ\xb8\xde?Y\xf2\x8b%\xbfX\xe2?\xc3\xf5(\\\x8f\xc2\xe5?0\x96\xfcb\xc9/\xe6?R\xb8\x1e\x85\xebQ\xe8?\xe1z\x14\xaeG\xe1\xea?\x96\xfcb\xc9/\x96\xec?\x96\xfcb\xc9/\x96\xec?\x03\x9d6\xd0i\x03\xed?q=\n\xd7\xa3p\xed?q=\n\xd7\xa3p\xed?&\xbfX\xf2\x8b%\xef?\x93_,\xf9\xc5\x92\xef?\x93_,\xf9\xc5\x92\xef?\x93_,\xf9\xc5\x92\xef?\x93_,\xf9\xc5\x92\xef?\x93_,\xf9\xc5\x92\xef?\x00\x00\x00\x00\x00\x00\xf0?\x00\x00\x00\x00\x00\x00\xf0?\x00\x00\x00\x00\x00\x00\xf0?\x00\x00\x00\x00\x00\x00\xf0?\x00\x00\x00\x00\x00\x00\xf0?\x00\x00\x00\x00\x00\x00\xf0?\x00\x00\x00\x00\x00\x00\xf0?\x00\x00\x00\x00\x00\x00\xf0?\x00\x00\x00\x00\x00\x00\xf0?)\\\x8f\xc2\xf5(\xdc?)\\\x8f\xc2\xf5(\xdc?\x03\x9d6\xd0i\x03\xdd?\x03\x9d6\xd0i\x03\xdd?\xb8\x1e\x85\xebQ\xb8\xde?\x93_,\xf9\xc5\x92\xdf?\xa4p=\n\xd7\xa3\xe0?~\xb1\xe4\x17K~\xe1?\xc6\x92_,\xf9\xc5\xe2?\xc6\x92_,\xf9\xc5\xe2?\xa0\xd3\x06:m\xa0\xe3?{\x14\xaeG\xe1z\xe4?\xc3\xf5(\\\x8f\xc2\xe5?\xc3\xf5(\\\x8f\xc2\xe5?\xc3\xf5(\\\x8f\xc2\xe5?0\x96\xfcb\xc9/\xe6?\n\xd7\xa3p=\n\xe7?\n\xd7\xa3p=\n\xe7?\xe5\x17K~\xb1\xe4\xe7?\xe5\x17K~\xb1\xe4\xe7?wwwwww\xe7?wwwwww\xe7?wwwwww\xe7?wwwwww\xe7?wwwwww\xe7?wwwwww\xe7?wwwwww\xe7?)\\\x8f\xc2\xf5(\xdc?)\\\x8f\xc2\xf5(\xdc?\xb8\x1e\x85\xebQ\xb8\xde?\xb8\x1e\x85\xebQ\xb8\xde?\xecQ\xb8\x1e\x85\xeb\xe1?Y\xf2\x8b%\xbfX\xe2?\xc6\x92_,\xf9\xc5\xe2?333333\xe3?{\x14\xaeG\xe1z\xe4?{\x14\xaeG\xe1z\xe4?{\x14\xaeG\xe1z\xe4?{\x14\xaeG\xe1z\xe4?\xe8\xb4\x81N\x1b\xe8\xe4?{\x14\xaeG\xe1z\xe4?{\x14\xaeG\xe1z\xe4?{\x14\xaeG\xe1z\xe4?{\x14\xaeG\xe1z\xe4?{\x14\xaeG\xe1z\xe4?{\x14\xaeG\xe1z\xe4?UUUUUU\xe5?\xc3\xf5(\\\x8f\xc2\xe5?\xc3\xf5(\\\x8f\xc2\xe5?UUUUUU\xe5?UUUUUU\xe5?UUUUUU\xe5?UUUUUU\xe5?UUUUUU\xe5?)\\\x8f\xc2\xf5(\xdc?)\\\x8f\xc2\xf5(\xdc?\xb8\x1e\x85\xebQ\xb8\xde?\x93_,\xf9\xc5\x92\xdf?7\xd0i\x03\x9d6\xe0?7\xd0i\x03\x9d6\xe0?\x11\x11\x11\x11\x11\x11\xe1?7\xd0i\x03\x9d6\xe0?\xb8\x1e\x85\xebQ\xb8\xde?\xde\xdd\xdd\xdd\xdd\xdd\xdd?\xbfX\xf2\x8b%\xbf\xd8?\xe5\x17K~\xb1\xe4\xd7?\xbfX\xf2\x8b%\xbf\xd8?0\x96\xfcb\xc9/\xd6?UUUUUU\xd5?{\x14\xaeG\xe1z\xd4?\xecQ\xb8\x1e\x85\xeb\xd1?\xecQ\xb8\x1e\x85\xeb\xd1?\xecQ\xb8\x1e\x85\xeb\xd1?\x11\x11\x11\x11\x11\x11\xd1?\x11\x11\x11\x11\x11\x11\xd1?\x11\x11\x11\x11\x11\x11\xd1?7\xd0i\x03\x9d6\xd0?7\xd0i\x03\x9d6\xd0?7\xd0i\x03\x9d6\xd0?7\xd0i\x03\x9d6\xd0?\xb8\x1e\x85\xebQ\xb8\xce?)\\\x8f\xc2\xf5(\xdc?\xb8\x1e\x85\xebQ\xb8\xde?\x11\x11\x11\x11\x11\x11\xe1?\x0et\xda@\xa7\r\xe4?\xe8\xb4\x81N\x1b\xe8\xe4?\xc3\xf5(\\\x8f\xc2\xe5?\x9d6\xd0i\x03\x9d\xe6?0\x96\xfcb\xc9/\xe6?\xc3\xf5(\\\x8f\xc2\xe5?0\x96\xfcb\xc9/\xe6?0\x96\xfcb\xc9/\xe6?\xe8\xb4\x81N\x1b\xe8\xe4?{\x14\xaeG\xe1z\xe4?\x0et\xda@\xa7\r\xe4?333333\xe3?\xc6\x92_,\xf9\xc5\xe2?\xc6\x92_,\xf9\xc5\xe2?\xc6\x92_,\xf9\xc5\xe2?\xc6\x92_,\xf9\xc5\xe2?\xc6\x92_,\xf9\xc5\xe2?Y\xf2\x8b%\xbfX\xe2?~\xb1\xe4\x17K~\xe1?~\xb1\xe4\x17K~\xe1?~\xb1\xe4\x17K~\xe1?~\xb1\xe4\x17K~\xe1?~\xb1\xe4\x17K~\xe1?\x11\x11\x11\x11\x11\x11\xe1?)\\\x8f\xc2\xf5(\xdc?\xa4p=\n\xd7\xa3\xe0?\xc6\x92_,\xf9\xc5\xe2?UUUUUU\xe5?0\x96\xfcb\xc9/\xe6?wwwwww\xe7?UUUUUU\xe5?\xecQ\xb8\x1e\x85\xeb\xe1?\xde\xdd\xdd\xdd\xdd\xdd\xdd?\x9a\x99\x99\x99\x99\x99\xd9?\xa0\xd3\x06:m\xa0\xd3?\x03\x9d6\xd0i\x03\xcd?\xb8\x1e\x85\xebQ\xb8\xbe?{\x14\xaeG\xe1z\xb4?O\x1b\xe8\xb4\x81N\xab?{\x14\xaeG\xe1z\xa4?O\x1b\xe8\xb4\x81N\x9b?O\x1b\xe8\xb4\x81N\x8b?O\x1b\xe8\xb4\x81N\x8b?\x00\x00\x00\x00\x00\x00\x00\x00\x00\x00\x00\x00\x00\x00\x00\x00\x00\x00\x00\x00\x00\x00\x00\x00\x00\x00\x00\x00\x00\x00\x00\x00\x00\x00\x00\x00\x00\x00\x00\x00\x00\x00\x00\x00\x00\x00\x00\x00\x00\x00\x00\x00\x00\x00\x00\x00\x00\x00\x00\x00\x00\x00\x00\x00)\\\x8f\xc2\xf5(\xdc?7\xd0i\x03\x9d6\xe0?Y\xf2\x8b%\xbfX\xe2?\xa0\xd3\x06:m\xa0\xe3?\xe8\xb4\x81N\x1b\xe8\xe4?UUUUUU\xe5?\xc3\xf5(\\\x8f\xc2\xe5?UUUUUU\xe5?\xe8\xb4\x81N\x1b\xe8\xe4?\x0et\xda@\xa7\r\xe4?{\x14\xaeG\xe1z\xe4?333333\xe3?\xa4p=\n\xd7\xa3\xe0?\x93_,\xf9\xc5\x92\xdf?\xde\xdd\xdd\xdd\xdd\xdd\xdd?)\\\x8f\xc2\xf5(\xdc?O\x1b\xe8\xb4\x81N\xdb?O\x1b\xe8\xb4\x81N\xdb?t\xda@\xa7\rt\xda?\xe5\x17K~\xb1\xe4\xd7?\xe5\x17K~\xb1\xe4\xd7?\xe5\x17K~\xb1\xe4\xd7?\n\xd7\xa3p=\n\xd7?\n\xd7\xa3p=\n\xd7?0\x96\xfcb\xc9/\xd6?UUUUUU\xd5?UUUUUU\xd5?)\\\x8f\xc2\xf5(\xdc?Y\xf2\x8b%\xbfX\xe2?\xc3\xf5(\\\x8f\xc2\xe5?\xe5\x17K~\xb1\xe4\xe7?\xbfX\xf2\x8b%\xbf\xe8?t\xda@\xa7\rt\xea?\x9a\x99\x99\x99\x99\x99\xe9?,\xf9\xc5\x92_,\xe9?\xc3\xf5(\\\x8f\xc2\xe5?\xc6\x92_,\xf9\xc5\xe2?O\x1b\xe8\xb4\x81N\xdb?\n\xd7\xa3p=\n\xd7?\x11\x11\x11\x11\x11\x11\xd1?O\x1b\xe8\xb4\x81N\xcb?\xc6\x92_,\xf9\xc5\xc2?\x11\x11\x11\x11\x11\x11\xc1?O\x1b\xe8\xb4\x81N\xbb?\x11\x11\x11\x11\x11\x11\xb1?\x11\x11\x11\x11\x11\x11\xb1?\x11\x11\x11\x11\x11\x11\xb1?\x11\x11\x11\x11\x11\x11\xb1?\x11\x11\x11\x11\x11\x11\xb1?\x11\x11\x11\x11\x11\x11\xb1?\x11\x11\x11\x11\x11\x11\xb1?\x11\x11\x11\x11\x11\x11\xb1?\x11\x11\x11\x11\x11\x11\xb1?\x11\x11\x11\x11\x11\x11\xb1?)\\\x8f\xc2\xf5(\xdc?\xb8\x1e\x85\xebQ\xb8\xde?\xc6\x92_,\xf9\xc5\xe2?0\x96\xfcb\xc9/\xe6?\xe5\x17K~\xb1\xe4\xe7?t\xda@\xa7\rt\xea?O\x1b\xe8\xb4\x81N\xeb?\x96\xfcb\xc9/\x96\xec?\x96\xfcb\xc9/\x96\xec?\x03\x9d6\xd0i\x03\xed?)\\\x8f\xc2\xf5(\xec?\xbc\xbb\xbb\xbb\xbb\xbb\xeb?)\\\x8f\xc2\xf5(\xec?\xe1z\x14\xaeG\xe1\xea?\xe1z\x14\xaeG\xe1\xea?t\xda@\xa7\rt\xea?t\xda@\xa7\rt\xea?\x07:m\xa0\xd3\x06\xea?\x9a\x99\x99\x99\x99\x99\xe9?\x9a\x99\x99\x99\x99\x99\xe9?,\xf9\xc5\x92_,\xe9?,\xf9\xc5\x92_,\xe9?,\xf9\xc5\x92_,\xe9?\xbfX\xf2\x8b%\xbf\xe8?R\xb8\x1e\x85\xebQ\xe8?\xe5\x17K~\xb1\xe4\xe7?\xe5\x17K~\xb1\xe4\xe7?)\\\x8f\xc2\xf5(\xdc?\x93_,\xf9\xc5\x92\xdf?{\x14\xaeG\xe1z\xe4?\xe5\x17K~\xb1\xe4\xe7?\x9a\x99\x99\x99\x99\x99\xe9?\xe1z\x14\xaeG\xe1\xea?)\\\x8f\xc2\xf5(\xec?q=\n\xd7\xa3p\xed?q=\n\xd7\xa3p\xed?\xde\xdd\xdd\xdd\xdd\xdd\xed?K~\xb1\xe4\x17K\xee?K~\xb1\xe4\x17K\xee?K~\xb1\xe4\x17K\xee?\xb8\x1e\x85\xebQ\xb8\xee?\xb8\x1e\x85\xebQ\xb8\xee?\xb8\x1e\x85\xebQ\xb8\xee?\xb8\x1e\x85\xebQ\xb8\xee?\xb8\x1e\x85\xebQ\xb8\xee?\xb8\x1e\x85\xebQ\xb8\xee?\xb8\x1e\x85\xebQ\xb8\xee?K~\xb1\xe4\x17K\xee?K~\xb1\xe4\x17K\xee?K~\xb1\xe4\x17K\xee?\xb8\x1e\x85\xebQ\xb8\xee?\xb8\x1e\x85\xebQ\xb8\xee?\xb8\x1e\x85\xebQ\xb8\xee?\xb8\x1e\x85\xebQ\xb8\xee?)\\\x8f\xc2\xf5(\xdc?\xa0\xd3\x06:m\xa0\xe3?R\xb8\x1e\x85\xebQ\xe8?O\x1b\xe8\xb4\x81N\xeb?\x96\xfcb\xc9/\x96\xec?\xb8\x1e\x85\xebQ\xb8\xee?\x00\x00\x00\x00\x00\x00\xf0?\x00\x00\x00\x00\x00\x00\xf0?\x00\x00\x00\x00\x00\x00\xf0?\x00\x00\x00\x00\x00\x00\xf0?\x00\x00\x00\x00\x00\x00\xf0?\x00\x00\x00\x00\x00\x00\xf0?\x00\x00\x00\x00\x00\x00\xf0?\x00\x00\x00\x00\x00\x00\xf0?\x00\x00\x00\x00\x00\x00\xf0?\x00\x00\x00\x00\x00\x00\xf0?\x00\x00\x00\x00\x00\x00\xf0?\x00\x00\x00\x00\x00\x00\xf0?\x00\x00\x00\x00\x00\x00\xf0?\x00\x00\x00\x00\x00\x00\xf0?\x00\x00\x00\x00\x00\x00\xf0?\x00\x00\x00\x00\x00\x00\xf0?\x00\x00\x00\x00\x00\x00\xf0?\x00\x00\x00\x00\x00\x00\xf0?\x00\x00\x00\x00\x00\x00\xf0?\x00\x00\x00\x00\x00\x00\xf0?\x00\x00\x00\x00\x00\x00\xf0?)\\\x8f\xc2\xf5(\xdc?\xc6\x92_,\xf9\xc5\xe2?\xbfX\xf2\x8b%\xbf\xe8?\xbc\xbb\xbb\xbb\xbb\xbb\xeb?)\\\x8f\xc2\xf5(\xec?q=\n\xd7\xa3p\xed?\x93_,\xf9\xc5\x92\xef?\x00\x00\x00\x00\x00\x00\xf0?\x00\x00\x00\x00\x00\x00\xf0?\x00\x00\x00\x00\x00\x00\xf0?\x00\x00\x00\x00\x00\x00\xf0?\x00\x00\x00\x00\x00\x00\xf0?\x00\x00\x00\x00\x00\x00\xf0?\x00\x00\x00\x00\x00\x00\xf0?\x00\x00\x00\x00\x00\x00\xf0?\x00\x00\x00\x00\x00\x00\xf0?\x00\x00\x00\x00\x00\x00\xf0?\x00\x00\x00\x00\x00\x00\xf0?\x00\x00\x00\x00\x00\x00\xf0?\x00\x00\x00\x00\x00\x00\xf0?\x00\x00\x00\x00\x00\x00\xf0?\x00\x00\x00\x00\x00\x00\xf0?\x00\x00\x00\x00\x00\x00\xf0?\x00\x00\x00\x00\x00\x00\xf0?\x00\x00\x00\x00\x00\x00\xf0?\x00\x00\x00\x00\x00\x00\xf0?\x00\x00\x00\x00\x00\x00\xf0?)\\\x8f\xc2\xf5(\xdc?~\xb1\xe4\x17K~\xe1?\xe5\x17K~\xb1\xe4\xe7?\xbc\xbb\xbb\xbb\xbb\xbb\xeb?\x96\xfcb\xc9/\x96\xec?K~\xb1\xe4\x17K\xee?\x00\x00\x00\x00\x00\x00\xf0?\x00\x00\x00\x00\x00\x00\xf0?\x00\x00\x00\x00\x00\x00\xf0?\x00\x00\x00\x00\x00\x00\xf0?\x00\x00\x00\x00\x00\x00\xf0?\x00\x00\x00\x00\x00\x00\xf0?\x00\x00\x00\x00\x00\x00\xf0?\x00\x00\x00\x00\x00\x00\xf0?\x00\x00\x00\x00\x00\x00\xf0?\x00\x00\x00\x00\x00\x00\xf0?\x00\x00\x00\x00\x00\x00\xf0?\x00\x00\x00\x00\x00\x00\xf0?\x00\x00\x00\x00\x00\x00\xf0?\x00\x00\x00\x00\x00\x00\xf0?\x00\x00\x00\x00\x00\x00\xf0?\x00\x00\x00\x00\x00\x00\xf0?\x00\x00\x00\x00\x00\x00\xf0?\x00\x00\x00\x00\x00\x00\xf0?\x00\x00\x00\x00\x00\x00\xf0?\x00\x00\x00\x00\x00\x00\xf0?\x00\x00\x00\x00\x00\x00\xf0?)\\\x8f\xc2\xf5(\xdc?~\xb1\xe4\x17K~\xe1?\n\xd7\xa3p=\n\xe7?t\xda@\xa7\rt\xea?)\\\x8f\xc2\xf5(\xec?q=\n\xd7\xa3p\xed?K~\xb1\xe4\x17K\xee?&\xbfX\xf2\x8b%\xef?\x00\x00\x00\x00\x00\x00\xf0?\x00\x00\x00\x00\x00\x00\xf0?\x00\x00\x00\x00\x00\x00\xf0?\x00\x00\x00\x00\x00\x00\xf0?\x00\x00\x00\x00\x00\x00\xf0?\x00\x00\x00\x00\x00\x00\xf0?\x00\x00\x00\x00\x00\x00\xf0?\x00\x00\x00\x00\x00\x00\xf0?\x00\x00\x00\x00\x00\x00\xf0?\x00\x00\x00\x00\x00\x00\xf0?\x00\x00\x00\x00\x00\x00\xf0?\x00\x00\x00\x00\x00\x00\xf0?\x00\x00\x00\x00\x00\x00\xf0?\x00\x00\x00\x00\x00\x00\xf0?\x00\x00\x00\x00\x00\x00\xf0?\x00\x00\x00\x00\x00\x00\xf0?\x00\x00\x00\x00\x00\x00\xf0?\x00\x00\x00\x00\x00\x00\xf0?\x00\x00\x00\x00\x00\x00\xf0?UUUUUU\xe5?UUUUUU\xe5?\xc3\xf5(\\\x8f\xc2\xe5?\xc3\xf5(\\\x8f\xc2\xe5?\xc3\xf5(\\\x8f\xc2\xe5?0\x96\xfcb\xc9/\xe6?0\x96\xfcb\xc9/\xe6?0\x96\xfcb\xc9/\xe6?\x9d6\xd0i\x03\x9d\xe6?\x9d6\xd0i\x03\x9d\xe6?\x9d6\xd0i\x03\x9d\xe6?\x9d6\xd0i\x03\x9d\xe6?\x9d6\xd0i\x03\x9d\xe6?\x9d6\xd0i\x03\x9d\xe6?\x9d6\xd0i\x03\x9d\xe6?\x9d6\xd0i\x03\x9d\xe6?\x9d6\xd0i\x03\x9d\xe6?\x9d6\xd0i\x03\x9d\xe6?\x9d6\xd0i\x03\x9d\xe6?0\x96\xfcb\xc9/\xe6?0\x96\xfcb\xc9/\xe6?\xc3\xf5(\\\x8f\xc2\xe5?\xc3\xf5(\\\x8f\xc2\xe5?0\x96\xfcb\xc9/\xe6?\xc3\xf5(\\\x8f\xc2\xe5?\xc3\xf5(\\\x8f\xc2\xe5?\xc3\xf5(\\\x8f\xc2\xe5?UUUUUU\xe5?\xc3\xf5(\\\x8f\xc2\xe5?\xe8\xb4\x81N\x1b\xe8\xe4?UUUUUU\xe5?UUUUUU\xe5?UUUUUU\xe5?UUUUUU\xe5?UUUUUU\xe5?UUUUUU\xe5?UUUUUU\xe5?0\x96\xfcb\xc9/\xe6?0\x96\xfcb\xc9/\xe6?\xc3\xf5(\\\x8f\xc2\xe5?0\x96\xfcb\xc9/\xe6?\xc3\xf5(\\\x8f\xc2\xe5?0\x96\xfcb\xc9/\xe6?\xc3\xf5(\\\x8f\xc2\xe5?\xc3\xf5(\\\x8f\xc2\xe5?\xc3\xf5(\\\x8f\xc2\xe5?\xc3\xf5(\\\x8f\xc2\xe5?\xc3\xf5(\\\x8f\xc2\xe5?\xc3\xf5(\\\x8f\xc2\xe5?\xc3\xf5(\\\x8f\xc2\xe5?\xc3\xf5(\\\x8f\xc2\xe5?UUUUUU\xe5?UUUUUU\xe5?\xe8\xb4\x81N\x1b\xe8\xe4?UUUUUU\xe5?0\x96\xfcb\xc9/\xe6?0\x96\xfcb\xc9/\xe6?\x9d6\xd0i\x03\x9d\xe6?\n\xd7\xa3p=\n\xe7?\n\xd7\xa3p=\n\xe7?\n\xd7\xa3p=\n\xe7?\n\xd7\xa3p=\n\xe7?\n\xd7\xa3p=\n\xe7?\n\xd7\xa3p=\n\xe7?\n\xd7\xa3p=\n\xe7?\n\xd7\xa3p=\n\xe7?\n\xd7\xa3p=\n\xe7?\n\xd7\xa3p=\n\xe7?\n\xd7\xa3p=\n\xe7?\n\xd7\xa3p=\n\xe7?\n\xd7\xa3p=\n\xe7?\n\xd7\xa3p=\n\xe7?wwwwww\xe7?wwwwww\xe7?\n\xd7\xa3p=\n\xe7?\n\xd7\xa3p=\n\xe7?\n\xd7\xa3p=\n\xe7?\n\xd7\xa3p=\n\xe7?\n\xd7\xa3p=\n\xe7?\n\xd7\xa3p=\n\xe7?wwwwww\xe7?UUUUUU\xe5?\x9d6\xd0i\x03\x9d\xe6?\x9d6\xd0i\x03\x9d\xe6?\xe5\x17K~\xb1\xe4\xe7?,\xf9\xc5\x92_,\xe9?,\xf9\xc5\x92_,\xe9?\xbfX\xf2\x8b%\xbf\xe8?\xe5\x17K~\xb1\xe4\xe7?\n\xd7\xa3p=\n\xe7?0\x96\xfcb\xc9/\xe6?{\x14\xaeG\xe1z\xe4?333333\xe3?\xc6\x92_,\xf9\xc5\xe2?Y\xf2\x8b%\xbfX\xe2?\x11\x11\x11\x11\x11\x11\xe1?\x11\x11\x11\x11\x11\x11\xe1?7\xd0i\x03\x9d6\xe0?7\xd0i\x03\x9d6\xe0?7\xd0i\x03\x9d6\xe0?\xb8\x1e\x85\xebQ\xb8\xde?\xb8\x1e\x85\xebQ\xb8\xde?\xde\xdd\xdd\xdd\xdd\xdd\xdd?\xb8\x1e\x85\xebQ\xb8\xde?\xde\xdd\xdd\xdd\xdd\xdd\xdd?O\x1b\xe8\xb4\x81N\xdb?t\xda@\xa7\rt\xda?\x9a\x99\x99\x99\x99\x99\xd9?UUUUUU\xe5?\n\xd7\xa3p=\n\xe7?\xe5\x17K~\xb1\xe4\xe7?,\xf9\xc5\x92_,\xe9?\x07:m\xa0\xd3\x06\xea?\x07:m\xa0\xd3\x06\xea?\x07:m\xa0\xd3\x06\xea?\x07:m\xa0\xd3\x06\xea?\x07:m\xa0\xd3\x06\xea?t\xda@\xa7\rt\xea?t\xda@\xa7\rt\xea?\x9a\x99\x99\x99\x99\x99\xe9?\xbfX\xf2\x8b%\xbf\xe8?\xbfX\xf2\x8b%\xbf\xe8?R\xb8\x1e\x85\xebQ\xe8?R\xb8\x1e\x85\xebQ\xe8?\xe5\x17K~\xb1\xe4\xe7?wwwwww\xe7?wwwwww\xe7?wwwwww\xe7?wwwwww\xe7?wwwwww\xe7?wwwwww\xe7?wwwwww\xe7?\x9d6\xd0i\x03\x9d\xe6?\x9d6\xd0i\x03\x9d\xe6?\x9d6\xd0i\x03\x9d\xe6?UUUUUU\xe5?\n\xd7\xa3p=\n\xe7?\xe5\x17K~\xb1\xe4\xe7?t\xda@\xa7\rt\xea?\xe1z\x14\xaeG\xe1\xea?t\xda@\xa7\rt\xea?t\xda@\xa7\rt\xea?\xe1z\x14\xaeG\xe1\xea?\xe1z\x14\xaeG\xe1\xea?\xe1z\x14\xaeG\xe1\xea?\xe1z\x14\xaeG\xe1\xea?\xe1z\x14\xaeG\xe1\xea?\xe1z\x14\xaeG\xe1\xea?\xe1z\x14\xaeG\xe1\xea?\xe1z\x14\xaeG\xe1\xea?\xe1z\x14\xaeG\xe1\xea?t\xda@\xa7\rt\xea?t\xda@\xa7\rt\xea?t\xda@\xa7\rt\xea?t\xda@\xa7\rt\xea?t\xda@\xa7\rt\xea?\x07:m\xa0\xd3\x06\xea?\x07:m\xa0\xd3\x06\xea?t\xda@\xa7\rt\xea?t\xda@\xa7\rt\xea?\x07:m\xa0\xd3\x06\xea?\x07:m\xa0\xd3\x06\xea?UUUUUU\xe5?\xe5\x17K~\xb1\xe4\xe7?\x07:m\xa0\xd3\x06\xea?\xe1z\x14\xaeG\xe1\xea?)\\\x8f\xc2\xf5(\xec?\x03\x9d6\xd0i\x03\xed?\x03\x9d6\xd0i\x03\xed?q=\n\xd7\xa3p\xed?\x03\x9d6\xd0i\x03\xed?\x03\x9d6\xd0i\x03\xed?\x96\xfcb\xc9/\x96\xec?\x03\x9d6\xd0i\x03\xed?\xbc\xbb\xbb\xbb\xbb\xbb\xeb?\xbc\xbb\xbb\xbb\xbb\xbb\xeb?\x9a\x99\x99\x99\x99\x99\xe9?R\xb8\x1e\x85\xebQ\xe8?wwwwww\xe7?\n\xd7\xa3p=\n\xe7?\x9d6\xd0i\x03\x9d\xe6?UUUUUU\xe5?UUUUUU\xe5?UUUUUU\xe5?UUUUUU\xe5?\x0et\xda@\xa7\r\xe4?\x0et\xda@\xa7\r\xe4?\x0et\xda@\xa7\r\xe4?\x0et\xda@\xa7\r\xe4?UUUUUU\xe5?wwwwww\xe7?\x9a\x99\x99\x99\x99\x99\xe9?\xbc\xbb\xbb\xbb\xbb\xbb\xeb?\x96\xfcb\xc9/\x96\xec?K~\xb1\xe4\x17K\xee?K~\xb1\xe4\x17K\xee?K~\xb1\xe4\x17K\xee?K~\xb1\xe4\x17K\xee?\xb8\x1e\x85\xebQ\xb8\xee?\xb8\x1e\x85\xebQ\xb8\xee?\xb8\x1e\x85\xebQ\xb8\xee?\xb8\x1e\x85\xebQ\xb8\xee?&\xbfX\xf2\x8b%\xef?&\xbfX\xf2\x8b%\xef?&\xbfX\xf2\x8b%\xef?&\xbfX\xf2\x8b%\xef?&\xbfX\xf2\x8b%\xef?&\xbfX\xf2\x8b%\xef?&\xbfX\xf2\x8b%\xef?&\xbfX\xf2\x8b%\xef?&\xbfX\xf2\x8b%\xef?&\xbfX\xf2\x8b%\xef?&\xbfX\xf2\x8b%\xef?&\xbfX\xf2\x8b%\xef?&\xbfX\xf2\x8b%\xef?&\xbfX\xf2\x8b%\xef?UUUUUU\xe5?\xe5\x17K~\xb1\xe4\xe7?t\xda@\xa7\rt\xea?\x03\x9d6\xd0i\x03\xed?\xde\xdd\xdd\xdd\xdd\xdd\xed?\xb8\x1e\x85\xebQ\xb8\xee?\xb8\x1e\x85\xebQ\xb8\xee?\xb8\x1e\x85\xebQ\xb8\xee?\xb8\x1e\x85\xebQ\xb8\xee?\xb8\x1e\x85\xebQ\xb8\xee?\xb8\x1e\x85\xebQ\xb8\xee?&\xbfX\xf2\x8b%\xef?&\xbfX\xf2\x8b%\xef?\x93_,\xf9\xc5\x92\xef?\x93_,\xf9\xc5\x92\xef?\x93_,\xf9\xc5\x92\xef?\x93_,\xf9\xc5\x92\xef?\x93_,\xf9\xc5\x92\xef?\x93_,\xf9\xc5\x92\xef?\x93_,\xf9\xc5\x92\xef?\x93_,\xf9\xc5\x92\xef?\x93_,\xf9\xc5\x92\xef?\x93_,\xf9\xc5\x92\xef?\x93_,\xf9\xc5\x92\xef?\x93_,\xf9\xc5\x92\xef?\x93_,\xf9\xc5\x92\xef?\x93_,\xf9\xc5\x92\xef?UUUUUU\xe5?R\xb8\x1e\x85\xebQ\xe8?)\\\x8f\xc2\xf5(\xec?q=\n\xd7\xa3p\xed?K~\xb1\xe4\x17K\xee?\xb8\x1e\x85\xebQ\xb8\xee?\xb8\x1e\x85\xebQ\xb8\xee?\x93_,\xf9\xc5\x92\xef?\x93_,\xf9\xc5\x92\xef?\x93_,\xf9\xc5\x92\xef?\x00\x00\x00\x00\x00\x00\xf0?\x00\x00\x00\x00\x00\x00\xf0?\x00\x00\x00\x00\x00\x00\xf0?\x00\x00\x00\x00\x00\x00\xf0?\x00\x00\x00\x00\x00\x00\xf0?\x00\x00\x00\x00\x00\x00\xf0?\x00\x00\x00\x00\x00\x00\xf0?\x00\x00\x00\x00\x00\x00\xf0?\x00\x00\x00\x00\x00\x00\xf0?\x00\x00\x00\x00\x00\x00\xf0?\x00\x00\x00\x00\x00\x00\xf0?\x00\x00\x00\x00\x00\x00\xf0?\x00\x00\x00\x00\x00\x00\xf0?\x00\x00\x00\x00\x00\x00\xf0?\x00\x00\x00\x00\x00\x00\xf0?\x00\x00\x00\x00\x00\x00\xf0?\x00\x00\x00\x00\x00\x00\xf0?UUUUUU\xe5?R\xb8\x1e\x85\xebQ\xe8?)\\\x8f\xc2\xf5(\xec?K~\xb1\xe4\x17K\xee?\xb8\x1e\x85\xebQ\xb8\xee?&\xbfX\xf2\x8b%\xef?&\xbfX\xf2\x8b%\xef?\x93_,\xf9\xc5\x92\xef?\x00\x00\x00\x00\x00\x00\xf0?\x00\x00\x00\x00\x00\x00\xf0?\x00\x00\x00\x00\x00\x00\xf0?\x00\x00\x00\x00\x00\x00\xf0?\x00\x00\x00\x00\x00\x00\xf0?\x00\x00\x00\x00\x00\x00\xf0?\x00\x00\x00\x00\x00\x00\xf0?\x00\x00\x00\x00\x00\x00\xf0?\x00\x00\x00\x00\x00\x00\xf0?\x00\x00\x00\x00\x00\x00\xf0?\x00\x00\x00\x00\x00\x00\xf0?\x00\x00\x00\x00\x00\x00\xf0?\x00\x00\x00\x00\x00\x00\xf0?\x00\x00\x00\x00\x00\x00\xf0?\x00\x00\x00\x00\x00\x00\xf0?\x00\x00\x00\x00\x00\x00\xf0?\x00\x00\x00\x00\x00\x00\xf0?\x00\x00\x00\x00\x00\x00\xf0?\x00\x00\x00\x00\x00\x00\xf0?UUUUUU\xe5?,\xf9\xc5\x92_,\xe9?q=\n\xd7\xa3p\xed?\xb8\x1e\x85\xebQ\xb8\xee?&\xbfX\xf2\x8b%\xef?\x00\x00\x00\x00\x00\x00\xf0?\x00\x00\x00\x00\x00\x00\xf0?\x00\x00\x00\x00\x00\x00\xf0?\x00\x00\x00\x00\x00\x00\xf0?\x00\x00\x00\x00\x00\x00\xf0?\x00\x00\x00\x00\x00\x00\xf0?\x00\x00\x00\x00\x00\x00\xf0?\x00\x00\x00\x00\x00\x00\xf0?\x00\x00\x00\x00\x00\x00\xf0?\x00\x00\x00\x00\x00\x00\xf0?\x00\x00\x00\x00\x00\x00\xf0?\x00\x00\x00\x00\x00\x00\xf0?\x00\x00\x00\x00\x00\x00\xf0?\x00\x00\x00\x00\x00\x00\xf0?\x00\x00\x00\x00\x00\x00\xf0?\x00\x00\x00\x00\x00\x00\xf0?\x00\x00\x00\x00\x00\x00\xf0?\x00\x00\x00\x00\x00\x00\xf0?\x00\x00\x00\x00\x00\x00\xf0?\x00\x00\x00\x00\x00\x00\xf0?\x00\x00\x00\x00\x00\x00\xf0?\x00\x00\x00\x00\x00\x00\xf0?UUUUUU\xe5?R\xb8\x1e\x85\xebQ\xe8?\xde\xdd\xdd\xdd\xdd\xdd\xed?\xde\xdd\xdd\xdd\xdd\xdd\xed?K~\xb1\xe4\x17K\xee?&\xbfX\xf2\x8b%\xef?\x93_,\xf9\xc5\x92\xef?\x93_,\xf9\xc5\x92\xef?\x00\x00\x00\x00\x00\x00\xf0?\x00\x00\x00\x00\x00\x00\xf0?\x00\x00\x00\x00\x00\x00\xf0?\x00\x00\x00\x00\x00\x00\xf0?\x00\x00\x00\x00\x00\x00\xf0?\x00\x00\x00\x00\x00\x00\xf0?\x00\x00\x00\x00\x00\x00\xf0?\x00\x00\x00\x00\x00\x00\xf0?\x00\x00\x00\x00\x00\x00\xf0?\x00\x00\x00\x00\x00\x00\xf0?\x00\x00\x00\x00\x00\x00\xf0?\x00\x00\x00\x00\x00\x00\xf0?\x00\x00\x00\x00\x00\x00\xf0?\x00\x00\x00\x00\x00\x00\xf0?\x00\x00\x00\x00\x00\x00\xf0?\x00\x00\x00\x00\x00\x00\xf0?\x00\x00\x00\x00\x00\x00\xf0?\x00\x00\x00\x00\x00\x00\xf0?\x00\x00\x00\x00\x00\x00\xf0?O\x1b\xe8\xb4\x81N\x8b?O\x1b\xe8\xb4\x81N\x9b?O\x1b\xe8\xb4\x81N\x8b?O\x1b\xe8\xb4\x81N\x8b?O\x1b\xe8\xb4\x81N\x8b?O\x1b\xe8\xb4\x81N\x8b?O\x1b\xe8\xb4\x81N\x8b?O\x1b\xe8\xb4\x81N\x8b?O\x1b\xe8\xb4\x81N\x8b?O\x1b\xe8\xb4\x81N\x8b?O\x1b\xe8\xb4\x81N\x8b?O\x1b\xe8\xb4\x81N\x8b?O\x1b\xe8\xb4\x81N\x8b?O\x1b\xe8\xb4\x81N\x8b?O\x1b\xe8\xb4\x81N\x8b?O\x1b\xe8\xb4\x81N\x8b?O\x1b\xe8\xb4\x81N\x8b?O\x1b\xe8\xb4\x81N\x8b?O\x1b\xe8\xb4\x81N\x9b?O\x1b\xe8\xb4\x81N\x9b?O\x1b\xe8\xb4\x81N\x9b?O\x1b\xe8\xb4\x81N\x9b?O\x1b\xe8\xb4\x81N\x9b?O\x1b\xe8\xb4\x81N\x9b?O\x1b\xe8\xb4\x81N\x9b?O\x1b\xe8\xb4\x81N\x9b?O\x1b\xe8\xb4\x81N\x9b?O\x1b\xe8\xb4\x81N\x8b?\x00\x00\x00\x00\x00\x00\x00\x00\x00\x00\x00\x00\x00\x00\x00\x00\x00\x00\x00\x00\x00\x00\x00\x00\x00\x00\x00\x00\x00\x00\x00\x00\x00\x00\x00\x00\x00\x00\x00\x00\x00\x00\x00\x00\x00\x00\x00\x00\x00\x00\x00\x00\x00\x00\x00\x00\x00\x00\x00\x00\x00\x00\x00\x00\x00\x00\x00\x00\x00\x00\x00\x00\x00\x00\x00\x00\x00\x00\x00\x00\x00\x00\x00\x00\x00\x00\x00\x00\x00\x00\x00\x00\x00\x00\x00\x00\x00\x00\x00\x00\x00\x00\x00\x00\x00\x00\x00\x00\x00\x00\x00\x00\x00\x00\x00\x00\x00\x00\x00\x00\x00\x00\x00\x00\x00\x00\x00\x00\x00\x00\x00\x00\x00\x00\x00\x00\x00\x00\x00\x00\x00\x00\x00\x00\x00\x00\x00\x00\x00\x00\x00\x00\x00\x00\x00\x00\x00\x00\x00\x00\x00\x00\x00\x00\x00\x00\x00\x00\x00\x00\x00\x00\x00\x00\x00\x00\x00\x00\x00\x00\x00\x00\x00\x00\x00\x00\x00\x00\x00\x00\x00\x00\x00\x00\x00\x00\x00\x00\x00\x00O\x1b\xe8\xb4\x81N\x8b?O\x1b\xe8\xb4\x81N\x8b?\x00\x00\x00\x00\x00\x00\x00\x00\x00\x00\x00\x00\x00\x00\x00\x00\x00\x00\x00\x00\x00\x00\x00\x00\x00\x00\x00\x00\x00\x00\x00\x00\x00\x00\x00\x00\x00\x00\x00\x00\x00\x00\x00\x00\x00\x00\x00\x00\x00\x00\x00\x00\x00\x00\x00\x00\x00\x00\x00\x00\x00\x00\x00\x00\x00\x00\x00\x00\x00\x00\x00\x00\x00\x00\x00\x00\x00\x00\x00\x00\x00\x00\x00\x00\x00\x00\x00\x00\x00\x00\x00\x00\x00\x00\x00\x00\x00\x00\x00\x00\x00\x00\x00\x00\x00\x00\x00\x00\x00\x00\x00\x00\x00\x00\x00\x00\x00\x00\x00\x00\x00\x00\x00\x00\x00\x00\x00\x00\x00\x00\x00\x00\x00\x00\x00\x00\x00\x00\x00\x00\x00\x00\x00\x00\x00\x00\x00\x00\x00\x00\x00\x00\x00\x00\x00\x00\x00\x00\x00\x00\x00\x00\x00\x00\x00\x00\x00\x00\x00\x00\x00\x00\x00\x00\x00\x00\x00\x00\x00\x00\x00\x00\x00\x00\x00\x00\x00\x00\x00\x00\x00\x00\x00\x00\x00\x00\x00\x00\x00\x00\x00\x00\x00\x00\x00\x00\x00\x00O\x1b\xe8\xb4\x81N\x8b?O\x1b\xe8\xb4\x81N\x9b?O\x1b\xe8\xb4\x81N\x9b?O\x1b\xe8\xb4\x81N\x9b?O\x1b\xe8\xb4\x81N\x9b?O\x1b\xe8\xb4\x81N\x8b?\x00\x00\x00\x00\x00\x00\x00\x00\x00\x00\x00\x00\x00\x00\x00\x00\x00\x00\x00\x00\x00\x00\x00\x00\x00\x00\x00\x00\x00\x00\x00\x00\x00\x00\x00\x00\x00\x00\x00\x00\x00\x00\x00\x00\x00\x00\x00\x00\x00\x00\x00\x00\x00\x00\x00\x00\x00\x00\x00\x00\x00\x00\x00\x00\x00\x00\x00\x00\x00\x00\x00\x00\x00\x00\x00\x00\x00\x00\x00\x00\x00\x00\x00\x00\x00\x00\x00\x00\x00\x00\x00\x00\x00\x00\x00\x00\x00\x00\x00\x00\x00\x00\x00\x00\x00\x00\x00\x00\x00\x00\x00\x00\x00\x00\x00\x00\x00\x00\x00\x00\x00\x00\x00\x00\x00\x00\x00\x00\x00\x00\x00\x00\x00\x00\x00\x00\x00\x00\x00\x00\x00\x00\x00\x00\x00\x00\x00\x00\x00\x00\x00\x00\x00\x00\x00\x00\x00\x00\x00\x00\x00\x00\x00\x00\x00\x00\x00\x00O\x1b\xe8\xb4\x81N\x8b?O\x1b\xe8\xb4\x81N\x9b?O\x1b\xe8\xb4\x81N\x9b?{\x14\xaeG\xe1z\xa4?\x11\x11\x11\x11\x11\x11\xb1?\x11\x11\x11\x11\x11\x11\xb1?{\x14\xaeG\xe1z\xa4?\x00\x00\x00\x00\x00\x00\x00\x00\x00\x00\x00\x00\x00\x00\x00\x00\x00\x00\x00\x00\x00\x00\x00\x00\x00\x00\x00\x00\x00\x00\x00\x00\x00\x00\x00\x00\x00\x00\x00\x00\x00\x00\x00\x00\x00\x00\x00\x00\x00\x00\x00\x00\x00\x00\x00\x00\x00\x00\x00\x00\x00\x00\x00\x00\x00\x00\x00\x00\x00\x00\x00\x00\x00\x00\x00\x00\x00\x00\x00\x00\x00\x00\x00\x00\x00\x00\x00\x00\x00\x00\x00\x00\x00\x00\x00\x00\x00\x00\x00\x00\x00\x00\x00\x00\x00\x00\x00\x00\x00\x00\x00\x00\x00\x00\x00\x00\x00\x00\x00\x00\x00\x00\x00\x00\x00\x00\x00\x00\x00\x00\x00\x00\x00\x00\x00\x00\x00\x00\x00\x00\x00\x00\x00\x00\x00\x00\x00\x00\x00\x00\x00\x00\x00\x00\x00\x00\x00\x00\x00\x00O\x1b\xe8\xb4\x81N\x8b?O\x1b\xe8\xb4\x81N\x9b?{\x14\xaeG\xe1z\xa4?{\x14\xaeG\xe1z\xa4?{\x14\xaeG\xe1z\xa4?O\x1b\xe8\xb4\x81N\xab?O\x1b\xe8\xb4\x81N\x9b?O\x1b\xe8\xb4\x81N\x8b?\x00\x00\x00\x00\x00\x00\x00\x00O\x1b\xe8\xb4\x81N\x8b?\x00\x00\x00\x00\x00\x00\x00\x00\x00\x00\x00\x00\x00\x00\x00\x00\x00\x00\x00\x00\x00\x00\x00\x00\x00\x00\x00\x00\x00\x00\x00\x00\x00\x00\x00\x00\x00\x00\x00\x00\x00\x00\x00\x00\x00\x00\x00\x00\x00\x00\x00\x00\x00\x00\x00\x00\x00\x00\x00\x00\x00\x00\x00\x00\x00\x00\x00\x00\x00\x00\x00\x00\x00\x00\x00\x00\x00\x00\x00\x00\x00\x00\x00\x00\x00\x00\x00\x00\x00\x00\x00\x00\x00\x00\x00\x00\x00\x00\x00\x00\x00\x00\x00\x00\x00\x00\x00\x00\x00\x00\x00\x00\x00\x00\x00\x00\x00\x00\x00\x00\x00\x00\x00\x00\x00\x00\x00\x00\x00\x00\x00\x00\x00\x00\x00\x00O\x1b\xe8\xb4\x81N\x8b?O\x1b\xe8\xb4\x81N\x9b?{\x14\xaeG\xe1z\xa4?O\x1b\xe8\xb4\x81N\xab?\xc6\x92_,\xf9\xc5\xc2?\xb8\x1e\x85\xebQ\xb8\xce?\xc6\x92_,\xf9\xc5\xd2?\x03\x9d6\xd0i\x03\xcd?\xb8\x1e\x85\xebQ\xb8\xbe?O\x1b\xe8\xb4\x81N\xab?O\x1b\xe8\xb4\x81N\xab?{\x14\xaeG\xe1z\xa4?{\x14\xaeG\xe1z\xa4?O\x1b\xe8\xb4\x81N\x9b?O\x1b\xe8\xb4\x81N\x9b?O\x1b\xe8\xb4\x81N\x9b?O\x1b\xe8\xb4\x81N\x9b?O\x1b\xe8\xb4\x81N\x9b?O\x1b\xe8\xb4\x81N\x9b?O\x1b\xe8\xb4\x81N\x9b?{\x14\xaeG\xe1z\xa4?{\x14\xaeG\xe1z\xa4?{\x14\xaeG\xe1z\xa4?O\x1b\xe8\xb4\x81N\xab?O\x1b\xe8\xb4\x81N\xab?\x11\x11\x11\x11\x11\x11\xb1?{\x14\xaeG\xe1z\xb4?O\x1b\xe8\xb4\x81N\x8b?O\x1b\xe8\xb4\x81N\x9b?{\x14\xaeG\xe1z\xa4?{\x14\xaeG\xe1z\xa4?{\x14\xaeG\xe1z\xa4?O\x1b\xe8\xb4\x81N\xab?\x11\x11\x11\x11\x11\x11\xc1?0\x96\xfcb\xc9/\xc6?{\x14\xaeG\xe1z\xc4?\x9a\x99\x99\x99\x99\x99\xc9?O\x1b\xe8\xb4\x81N\xcb?\xb8\x1e\x85\xebQ\xb8\xce?\xa0\xd3\x06:m\xa0\xd3?{\x14\xaeG\xe1z\xd4?UUUUUU\xd5?\n\xd7\xa3p=\n\xd7?\xe5\x17K~\xb1\xe4\xd7?\x9a\x99\x99\x99\x99\x99\xd9?O\x1b\xe8\xb4\x81N\xdb?)\\\x8f\xc2\xf5(\xdc?)\\\x8f\xc2\xf5(\xdc?\x03\x9d6\xd0i\x03\xdd?\xb8\x1e\x85\xebQ\xb8\xde?7\xd0i\x03\x9d6\xe0?7\xd0i\x03\x9d6\xe0?7\xd0i\x03\x9d6\xe0?Y\xf2\x8b%\xbfX\xe2?O\x1b\xe8\xb4\x81N\x8b?O\x1b\xe8\xb4\x81N\x9b?{\x14\xaeG\xe1z\xa4?{\x14\xaeG\xe1z\xa4?\x11\x11\x11\x11\x11\x11\xb1?\xb8\x1e\x85\xebQ\xb8\xbe?0\x96\xfcb\xc9/\xc6?UUUUUU\xd5?O\x1b\xe8\xb4\x81N\xdb?\x93_,\xf9\xc5\x92\xdf?Y\xf2\x8b%\xbfX\xe2?\xc6\x92_,\xf9\xc5\xe2?\x0et\xda@\xa7\r\xe4?\x0et\xda@\xa7\r\xe4?{\x14\xaeG\xe1z\xe4?\xe8\xb4\x81N\x1b\xe8\xe4?\xe8\xb4\x81N\x1b\xe8\xe4?\xe8\xb4\x81N\x1b\xe8\xe4?UUUUUU\xe5?0\x96\xfcb\xc9/\xe6?0\x96\xfcb\xc9/\xe6?0\x96\xfcb\xc9/\xe6?\x9d6\xd0i\x03\x9d\xe6?\x9d6\xd0i\x03\x9d\xe6?\x9d6\xd0i\x03\x9d\xe6?\n\xd7\xa3p=\n\xe7?wwwwww\xe7?O\x1b\xe8\xb4\x81N\x8b?O\x1b\xe8\xb4\x81N\x9b?{\x14\xaeG\xe1z\xa4?\x11\x11\x11\x11\x11\x11\xb1?\xe5\x17K~\xb1\xe4\xb7?\x03\x9d6\xd0i\x03\xcd?0\x96\xfcb\xc9/\xd6?O\x1b\xe8\xb4\x81N\xdb?Y\xf2\x8b%\xbfX\xe2?\x9d6\xd0i\x03\x9d\xe6?\xbfX\xf2\x8b%\xbf\xe8?\x07:m\xa0\xd3\x06\xea?t\xda@\xa7\rt\xea?O\x1b\xe8\xb4\x81N\xeb?O\x1b\xe8\xb4\x81N\xeb?O\x1b\xe8\xb4\x81N\xeb?\xe1z\x14\xaeG\xe1\xea?\xe1z\x14\xaeG\xe1\xea?\xe1z\x14\xaeG\xe1\xea?\xe1z\x14\xaeG\xe1\xea?\xe1z\x14\xaeG\xe1\xea?\x07:m\xa0\xd3\x06\xea?\x9a\x99\x99\x99\x99\x99\xe9?\x9a\x99\x99\x99\x99\x99\xe9?\xbfX\xf2\x8b%\xbf\xe8?R\xb8\x1e\x85\xebQ\xe8?\xe5\x17K~\xb1\xe4\xe7?O\x1b\xe8\xb4\x81N\x8b?O\x1b\xe8\xb4\x81N\x9b?{\x14\xaeG\xe1z\xa4?O\x1b\xe8\xb4\x81N\xab?O\x1b\xe8\xb4\x81N\xbb?{\x14\xaeG\xe1z\xc4?\x03\x9d6\xd0i\x03\xcd?0\x96\xfcb\xc9/\xd6?)\\\x8f\xc2\xf5(\xdc?\xa4p=\n\xd7\xa3\xe0?\x0et\xda@\xa7\r\xe4?,\xf9\xc5\x92_,\xe9?\x07:m\xa0\xd3\x06\xea?O\x1b\xe8\xb4\x81N\xeb?\xbc\xbb\xbb\xbb\xbb\xbb\xeb?)\\\x8f\xc2\xf5(\xec?\x96\xfcb\xc9/\x96\xec?\x96\xfcb\xc9/\x96\xec?\x03\x9d6\xd0i\x03\xed?q=\n\xd7\xa3p\xed?K~\xb1\xe4\x17K\xee?\xb8\x1e\x85\xebQ\xb8\xee?&\xbfX\xf2\x8b%\xef?&\xbfX\xf2\x8b%\xef?&\xbfX\xf2\x8b%\xef?&\xbfX\xf2\x8b%\xef?&\xbfX\xf2\x8b%\xef?O\x1b\xe8\xb4\x81N\x8b?{\x14\xaeG\xe1z\xa4?\x11\x11\x11\x11\x11\x11\xb1?\x11\x11\x11\x11\x11\x11\xc1?\xe5\x17K~\xb1\xe4\xc7?{\x14\xaeG\xe1z\xd4?\xde\xdd\xdd\xdd\xdd\xdd\xdd?\x11\x11\x11\x11\x11\x11\xe1?\xa0\xd3\x06:m\xa0\xe3?R\xb8\x1e\x85\xebQ\xe8?)\\\x8f\xc2\xf5(\xec?\xde\xdd\xdd\xdd\xdd\xdd\xed?\xde\xdd\xdd\xdd\xdd\xdd\xed?&\xbfX\xf2\x8b%\xef?&\xbfX\xf2\x8b%\xef?\x93_,\xf9\xc5\x92\xef?\x00\x00\x00\x00\x00\x00\xf0?\x00\x00\x00\x00\x00\x00\xf0?\x00\x00\x00\x00\x00\x00\xf0?\x00\x00\x00\x00\x00\x00\xf0?\x00\x00\x00\x00\x00\x00\xf0?\x00\x00\x00\x00\x00\x00\xf0?\x00\x00\x00\x00\x00\x00\xf0?\x00\x00\x00\x00\x00\x00\xf0?\x00\x00\x00\x00\x00\x00\xf0?\x00\x00\x00\x00\x00\x00\xf0?\x00\x00\x00\x00\x00\x00\xf0?O\x1b\xe8\xb4\x81N\x8b?{\x14\xaeG\xe1z\xa4?O\x1b\xe8\xb4\x81N\xab?{\x14\xaeG\xe1z\xb4?\xc6\x92_,\xf9\xc5\xc2?O\x1b\xe8\xb4\x81N\xcb?\xecQ\xb8\x1e\x85\xeb\xd1?{\x14\xaeG\xe1z\xd4?\xde\xdd\xdd\xdd\xdd\xdd\xdd?~\xb1\xe4\x17K~\xe1?333333\xe3?{\x14\xaeG\xe1z\xe4?\n\xd7\xa3p=\n\xe7?,\xf9\xc5\x92_,\xe9?t\xda@\xa7\rt\xea?O\x1b\xe8\xb4\x81N\xeb?\x96\xfcb\xc9/\x96\xec?\x03\x9d6\xd0i\x03\xed?\xde\xdd\xdd\xdd\xdd\xdd\xed?&\xbfX\xf2\x8b%\xef?\x93_,\xf9\xc5\x92\xef?\x00\x00\x00\x00\x00\x00\xf0?\x00\x00\x00\x00\x00\x00\xf0?\x00\x00\x00\x00\x00\x00\xf0?\x00\x00\x00\x00\x00\x00\xf0?\x00\x00\x00\x00\x00\x00\xf0?\x00\x00\x00\x00\x00\x00\xf0?\xa0\xd3\x06:m\xa0\xe3?333333\xe3?333333\xe3?Y\xf2\x8b%\xbfX\xe2?Y\xf2\x8b%\xbfX\xe2?Y\xf2\x8b%\xbfX\xe2?Y\xf2\x8b%\xbfX\xe2?Y\xf2\x8b%\xbfX\xe2?Y\xf2\x8b%\xbfX\xe2?Y\xf2\x8b%\xbfX\xe2?Y\xf2\x8b%\xbfX\xe2?Y\xf2\x8b%\xbfX\xe2?Y\xf2\x8b%\xbfX\xe2?Y\xf2\x8b%\xbfX\xe2?Y\xf2\x8b%\xbfX\xe2?Y\xf2\x8b%\xbfX\xe2?Y\xf2\x8b%\xbfX\xe2?Y\xf2\x8b%\xbfX\xe2?Y\xf2\x8b%\xbfX\xe2?Y\xf2\x8b%\xbfX\xe2?Y\xf2\x8b%\xbfX\xe2?Y\xf2\x8b%\xbfX\xe2?Y\xf2\x8b%\xbfX\xe2?\xc6\x92_,\xf9\xc5\xe2?\xc6\x92_,\xf9\xc5\xe2?\xc6\x92_,\xf9\xc5\xe2?\xc6\x92_,\xf9\xc5\xe2?\xa0\xd3\x06:m\xa0\xe3?333333\xe3?\xc6\x92_,\xf9\xc5\xe2?\xc6\x92_,\xf9\xc5\xe2?\xc6\x92_,\xf9\xc5\xe2?333333\xe3?333333\xe3?333333\xe3?333333\xe3?333333\xe3?\xc6\x92_,\xf9\xc5\xe2?\xc6\x92_,\xf9\xc5\xe2?\xc6\x92_,\xf9\xc5\xe2?333333\xe3?333333\xe3?333333\xe3?333333\xe3?333333\xe3?\xa0\xd3\x06:m\xa0\xe3?\x0et\xda@\xa7\r\xe4?{\x14\xaeG\xe1z\xe4?\xe8\xb4\x81N\x1b\xe8\xe4?\xe8\xb4\x81N\x1b\xe8\xe4?{\x14\xaeG\xe1z\xe4?{\x14\xaeG\xe1z\xe4?{\x14\xaeG\xe1z\xe4?{\x14\xaeG\xe1z\xe4?\xa0\xd3\x06:m\xa0\xe3?\x0et\xda@\xa7\r\xe4?\x0et\xda@\xa7\r\xe4?\x0et\xda@\xa7\r\xe4?\x0et\xda@\xa7\r\xe4?{\x14\xaeG\xe1z\xe4?UUUUUU\xe5?\xc3\xf5(\\\x8f\xc2\xe5?\xc3\xf5(\\\x8f\xc2\xe5?0\x96\xfcb\xc9/\xe6?\x9d6\xd0i\x03\x9d\xe6?\x9d6\xd0i\x03\x9d\xe6?\n\xd7\xa3p=\n\xe7?\n\xd7\xa3p=\n\xe7?\n\xd7\xa3p=\n\xe7?wwwwww\xe7?wwwwww\xe7?wwwwww\xe7?wwwwww\xe7?wwwwww\xe7?wwwwww\xe7?wwwwww\xe7?wwwwww\xe7?wwwwww\xe7?wwwwww\xe7?wwwwww\xe7?wwwwww\xe7?\xa0\xd3\x06:m\xa0\xe3?\xa0\xd3\x06:m\xa0\xe3?\xa0\xd3\x06:m\xa0\xe3?\x0et\xda@\xa7\r\xe4?\x0et\xda@\xa7\r\xe4?\x0et\xda@\xa7\r\xe4?\x0et\xda@\xa7\r\xe4?\xa0\xd3\x06:m\xa0\xe3?333333\xe3?333333\xe3?333333\xe3?333333\xe3?\xa0\xd3\x06:m\xa0\xe3?\xa0\xd3\x06:m\xa0\xe3?\xa0\xd3\x06:m\xa0\xe3?333333\xe3?333333\xe3?333333\xe3?333333\xe3?333333\xe3?333333\xe3?333333\xe3?333333\xe3?333333\xe3?333333\xe3?333333\xe3?333333\xe3?\xa0\xd3\x06:m\xa0\xe3?\x0et\xda@\xa7\r\xe4?\x0et\xda@\xa7\r\xe4?\xe8\xb4\x81N\x1b\xe8\xe4?\xc3\xf5(\\\x8f\xc2\xe5?0\x96\xfcb\xc9/\xe6?0\x96\xfcb\xc9/\xe6?\x9d6\xd0i\x03\x9d\xe6?\n\xd7\xa3p=\n\xe7?\n\xd7\xa3p=\n\xe7?\n\xd7\xa3p=\n\xe7?\n\xd7\xa3p=\n\xe7?wwwwww\xe7?\n\xd7\xa3p=\n\xe7?\n\xd7\xa3p=\n\xe7?\n\xd7\xa3p=\n\xe7?\n\xd7\xa3p=\n\xe7?\n\xd7\xa3p=\n\xe7?\x9d6\xd0i\x03\x9d\xe6?\x9d6\xd0i\x03\x9d\xe6?\x9d6\xd0i\x03\x9d\xe6?\x9d6\xd0i\x03\x9d\xe6?\x9d6\xd0i\x03\x9d\xe6?\x9d6\xd0i\x03\x9d\xe6?\x9d6\xd0i\x03\x9d\xe6?\x9d6\xd0i\x03\x9d\xe6?\x9d6\xd0i\x03\x9d\xe6?\xa0\xd3\x06:m\xa0\xe3?\x0et\xda@\xa7\r\xe4?0\x96\xfcb\xc9/\xe6?\n\xd7\xa3p=\n\xe7?wwwwww\xe7?\xe5\x17K~\xb1\xe4\xe7?\xe5\x17K~\xb1\xe4\xe7?R\xb8\x1e\x85\xebQ\xe8?\xbfX\xf2\x8b%\xbf\xe8?\xbfX\xf2\x8b%\xbf\xe8?,\xf9\xc5\x92_,\xe9?\x9a\x99\x99\x99\x99\x99\xe9?\x9a\x99\x99\x99\x99\x99\xe9?\x07:m\xa0\xd3\x06\xea?\x07:m\xa0\xd3\x06\xea?\x07:m\xa0\xd3\x06\xea?\x07:m\xa0\xd3\x06\xea?\x9a\x99\x99\x99\x99\x99\xe9?\x9a\x99\x99\x99\x99\x99\xe9?\x9a\x99\x99\x99\x99\x99\xe9?\x9a\x99\x99\x99\x99\x99\xe9?\x9a\x99\x99\x99\x99\x99\xe9?\x9a\x99\x99\x99\x99\x99\xe9?\x9a\x99\x99\x99\x99\x99\xe9?\x9a\x99\x99\x99\x99\x99\xe9?\x9a\x99\x99\x99\x99\x99\xe9?\x9a\x99\x99\x99\x99\x99\xe9?\xa0\xd3\x06:m\xa0\xe3?\xe8\xb4\x81N\x1b\xe8\xe4?\n\xd7\xa3p=\n\xe7?\n\xd7\xa3p=\n\xe7?\n\xd7\xa3p=\n\xe7?wwwwww\xe7?\xe5\x17K~\xb1\xe4\xe7?\xe5\x17K~\xb1\xe4\xe7?R\xb8\x1e\x85\xebQ\xe8?R\xb8\x1e\x85\xebQ\xe8?R\xb8\x1e\x85\xebQ\xe8?\xbfX\xf2\x8b%\xbf\xe8?\xbfX\xf2\x8b%\xbf\xe8?R\xb8\x1e\x85\xebQ\xe8?R\xb8\x1e\x85\xebQ\xe8?\xbfX\xf2\x8b%\xbf\xe8?\xbfX\xf2\x8b%\xbf\xe8?R\xb8\x1e\x85\xebQ\xe8?R\xb8\x1e\x85\xebQ\xe8?\xe5\x17K~\xb1\xe4\xe7?\xe5\x17K~\xb1\xe4\xe7?\xe5\x17K~\xb1\xe4\xe7?\xe5\x17K~\xb1\xe4\xe7?wwwwww\xe7?wwwwww\xe7?wwwwww\xe7?wwwwww\xe7?\xa0\xd3\x06:m\xa0\xe3?\xc3\xf5(\\\x8f\xc2\xe5?R\xb8\x1e\x85\xebQ\xe8?\xbfX\xf2\x8b%\xbf\xe8?,\xf9\xc5\x92_,\xe9?\x07:m\xa0\xd3\x06\xea?t\xda@\xa7\rt\xea?\xe1z\x14\xaeG\xe1\xea?O\x1b\xe8\xb4\x81N\xeb?O\x1b\xe8\xb4\x81N\xeb?\x03\x9d6\xd0i\x03\xed?\x03\x9d6\xd0i\x03\xed?q=\n\xd7\xa3p\xed?K~\xb1\xe4\x17K\xee?K~\xb1\xe4\x17K\xee?K~\xb1\xe4\x17K\xee?K~\xb1\xe4\x17K\xee?K~\xb1\xe4\x17K\xee?K~\xb1\xe4\x17K\xee?K~\xb1\xe4\x17K\xee?K~\xb1\xe4\x17K\xee?K~\xb1\xe4\x17K\xee?\xb8\x1e\x85\xebQ\xb8\xee?\xb8\x1e\x85\xebQ\xb8\xee?\xb8\x1e\x85\xebQ\xb8\xee?\xb8\x1e\x85\xebQ\xb8\xee?\xb8\x1e\x85\xebQ\xb8\xee?\xa0\xd3\x06:m\xa0\xe3?0\x96\xfcb\xc9/\xe6?\xbfX\xf2\x8b%\xbf\xe8?\xbfX\xf2\x8b%\xbf\xe8?\x07:m\xa0\xd3\x06\xea?\x07:m\xa0\xd3\x06\xea?t\xda@\xa7\rt\xea?O\x1b\xe8\xb4\x81N\xeb?)\\\x8f\xc2\xf5(\xec?q=\n\xd7\xa3p\xed?\xde\xdd\xdd\xdd\xdd\xdd\xed?K~\xb1\xe4\x17K\xee?K~\xb1\xe4\x17K\xee?\xb8\x1e\x85\xebQ\xb8\xee?\xb8\x1e\x85\xebQ\xb8\xee?&\xbfX\xf2\x8b%\xef?&\xbfX\xf2\x8b%\xef?&\xbfX\xf2\x8b%\xef?&\xbfX\xf2\x8b%\xef?&\xbfX\xf2\x8b%\xef?&\xbfX\xf2\x8b%\xef?&\xbfX\xf2\x8b%\xef?&\xbfX\xf2\x8b%\xef?&\xbfX\xf2\x8b%\xef?\x93_,\xf9\xc5\x92\xef?\x93_,\xf9\xc5\x92\xef?\x93_,\xf9\xc5\x92\xef?\xa0\xd3\x06:m\xa0\xe3?R\xb8\x1e\x85\xebQ\xe8?\xbfX\xf2\x8b%\xbf\xe8?\x9a\x99\x99\x99\x99\x99\xe9?\xe1z\x14\xaeG\xe1\xea?q=\n\xd7\xa3p\xed?&\xbfX\xf2\x8b%\xef?\x93_,\xf9\xc5\x92\xef?\x93_,\xf9\xc5\x92\xef?\x93_,\xf9\xc5\x92\xef?\x93_,\xf9\xc5\x92\xef?\x93_,\xf9\xc5\x92\xef?\x00\x00\x00\x00\x00\x00\xf0?\x00\x00\x00\x00\x00\x00\xf0?\x00\x00\x00\x00\x00\x00\xf0?\x00\x00\x00\x00\x00\x00\xf0?\x00\x00\x00\x00\x00\x00\xf0?\x00\x00\x00\x00\x00\x00\xf0?\x00\x00\x00\x00\x00\x00\xf0?\x00\x00\x00\x00\x00\x00\xf0?\x00\x00\x00\x00\x00\x00\xf0?\x00\x00\x00\x00\x00\x00\xf0?\x00\x00\x00\x00\x00\x00\xf0?\x00\x00\x00\x00\x00\x00\xf0?\x00\x00\x00\x00\x00\x00\xf0?\x00\x00\x00\x00\x00\x00\xf0?\x00\x00\x00\x00\x00\x00\xf0?\xa0\xd3\x06:m\xa0\xe3?\xbfX\xf2\x8b%\xbf\xe8?\x9a\x99\x99\x99\x99\x99\xe9?\xbc\xbb\xbb\xbb\xbb\xbb\xeb?\xde\xdd\xdd\xdd\xdd\xdd\xed?\xb8\x1e\x85\xebQ\xb8\xee?\x93_,\xf9\xc5\x92\xef?\x93_,\xf9\xc5\x92\xef?\x93_,\xf9\xc5\x92\xef?\x93_,\xf9\xc5\x92\xef?\x93_,\xf9\xc5\x92\xef?\x93_,\xf9\xc5\x92\xef?\x93_,\xf9\xc5\x92\xef?\x93_,\xf9\xc5\x92\xef?\x00\x00\x00\x00\x00\x00\xf0?\x00\x00\x00\x00\x00\x00\xf0?\x00\x00\x00\x00\x00\x00\xf0?\x00\x00\x00\x00\x00\x00\xf0?\x00\x00\x00\x00\x00\x00\xf0?\x00\x00\x00\x00\x00\x00\xf0?\x00\x00\x00\x00\x00\x00\xf0?\x00\x00\x00\x00\x00\x00\xf0?\x00\x00\x00\x00\x00\x00\xf0?\x00\x00\x00\x00\x00\x00\xf0?\x00\x00\x00\x00\x00\x00\xf0?\x00\x00\x00\x00\x00\x00\xf0?\x00\x00\x00\x00\x00\x00\xf0?\xa0\xd3\x06:m\xa0\xe3?\xbfX\xf2\x8b%\xbf\xe8?\xe1z\x14\xaeG\xe1\xea?\xb8\x1e\x85\xebQ\xb8\xee?\x93_,\xf9\xc5\x92\xef?\x93_,\xf9\xc5\x92\xef?\x93_,\xf9\xc5\x92\xef?\x93_,\xf9\xc5\x92\xef?\x00\x00\x00\x00\x00\x00\xf0?\x00\x00\x00\x00\x00\x00\xf0?\x00\x00\x00\x00\x00\x00\xf0?\x00\x00\x00\x00\x00\x00\xf0?\x00\x00\x00\x00\x00\x00\xf0?\x00\x00\x00\x00\x00\x00\xf0?\x00\x00\x00\x00\x00\x00\xf0?\x00\x00\x00\x00\x00\x00\xf0?\x00\x00\x00\x00\x00\x00\xf0?\x00\x00\x00\x00\x00\x00\xf0?\x00\x00\x00\x00\x00\x00\xf0?\x00\x00\x00\x00\x00\x00\xf0?\x00\x00\x00\x00\x00\x00\xf0?\x00\x00\x00\x00\x00\x00\xf0?\x00\x00\x00\x00\x00\x00\xf0?\x00\x00\x00\x00\x00\x00\xf0?\x00\x00\x00\x00\x00\x00\xf0?\x00\x00\x00\x00\x00\x00\xf0?\x00\x00\x00\x00\x00\x00\xf0?\xa0\xd3\x06:m\xa0\xe3?,\xf9\xc5\x92_,\xe9?t\xda@\xa7\rt\xea?K~\xb1\xe4\x17K\xee?\xb8\x1e\x85\xebQ\xb8\xee?&\xbfX\xf2\x8b%\xef?\x93_,\xf9\xc5\x92\xef?\x93_,\xf9\xc5\x92\xef?\x93_,\xf9\xc5\x92\xef?\x00\x00\x00\x00\x00\x00\xf0?\x00\x00\x00\x00\x00\x00\xf0?\x00\x00\x00\x00\x00\x00\xf0?\x00\x00\x00\x00\x00\x00\xf0?\x00\x00\x00\x00\x00\x00\xf0?\x00\x00\x00\x00\x00\x00\xf0?\x00\x00\x00\x00\x00\x00\xf0?\x00\x00\x00\x00\x00\x00\xf0?\x00\x00\x00\x00\x00\x00\xf0?\x00\x00\x00\x00\x00\x00\xf0?\x00\x00\x00\x00\x00\x00\xf0?\x00\x00\x00\x00\x00\x00\xf0?\x00\x00\x00\x00\x00\x00\xf0?\x00\x00\x00\x00\x00\x00\xf0?\x00\x00\x00\x00\x00\x00\xf0?\x00\x00\x00\x00\x00\x00\xf0?\x00\x00\x00\x00\x00\x00\xf0?\x00\x00\x00\x00\x00\x00\xf0?\xe5\x17K~\xb1\xe4\xc7?\xe5\x17K~\xb1\xe4\xc7?\xe5\x17K~\xb1\xe4\xc7?\xe5\x17K~\xb1\xe4\xc7?\x9a\x99\x99\x99\x99\x99\xc9?O\x1b\xe8\xb4\x81N\xcb?\x9a\x99\x99\x99\x99\x99\xc9?\x03\x9d6\xd0i\x03\xcd?\x03\x9d6\xd0i\x03\xcd?O\x1b\xe8\xb4\x81N\xcb?\x03\x9d6\xd0i\x03\xcd?\x03\x9d6\xd0i\x03\xcd?\x03\x9d6\xd0i\x03\xcd?\x03\x9d6\xd0i\x03\xcd?\xb8\x1e\x85\xebQ\xb8\xce?\x11\x11\x11\x11\x11\x11\xd1?\x11\x11\x11\x11\x11\x11\xd1?\x11\x11\x11\x11\x11\x11\xd1?\x11\x11\x11\x11\x11\x11\xd1?\x11\x11\x11\x11\x11\x11\xd1?\xecQ\xb8\x1e\x85\xeb\xd1?\xecQ\xb8\x1e\x85\xeb\xd1?\xecQ\xb8\x1e\x85\xeb\xd1?\xc6\x92_,\xf9\xc5\xd2?\xc6\x92_,\xf9\xc5\xd2?\xc6\x92_,\xf9\xc5\xd2?\xc6\x92_,\xf9\xc5\xd2?\xe5\x17K~\xb1\xe4\xc7?\x9a\x99\x99\x99\x99\x99\xc9?\xb8\x1e\x85\xebQ\xb8\xce?\xecQ\xb8\x1e\x85\xeb\xd1?UUUUUU\xd5?UUUUUU\xd5?0\x96\xfcb\xc9/\xd6?0\x96\xfcb\xc9/\xd6?0\x96\xfcb\xc9/\xd6?0\x96\xfcb\xc9/\xd6?0\x96\xfcb\xc9/\xd6?0\x96\xfcb\xc9/\xd6?UUUUUU\xd5?0\x96\xfcb\xc9/\xd6?UUUUUU\xd5?0\x96\xfcb\xc9/\xd6?\n\xd7\xa3p=\n\xd7?0\x96\xfcb\xc9/\xd6?0\x96\xfcb\xc9/\xd6?0\x96\xfcb\xc9/\xd6?0\x96\xfcb\xc9/\xd6?0\x96\xfcb\xc9/\xd6?0\x96\xfcb\xc9/\xd6?UUUUUU\xd5?UUUUUU\xd5?0\x96\xfcb\xc9/\xd6?0\x96\xfcb\xc9/\xd6?\xe5\x17K~\xb1\xe4\xc7?\x9a\x99\x99\x99\x99\x99\xc9?\x9a\x99\x99\x99\x99\x99\xc9?O\x1b\xe8\xb4\x81N\xcb?\x03\x9d6\xd0i\x03\xcd?\xb8\x1e\x85\xebQ\xb8\xce?\xb8\x1e\x85\xebQ\xb8\xce?7\xd0i\x03\x9d6\xd0?7\xd0i\x03\x9d6\xd0?\x11\x11\x11\x11\x11\x11\xd1?\x11\x11\x11\x11\x11\x11\xd1?\x11\x11\x11\x11\x11\x11\xd1?\xc6\x92_,\xf9\xc5\xd2?\xc6\x92_,\xf9\xc5\xd2?\xc6\x92_,\xf9\xc5\xd2?\xc6\x92_,\xf9\xc5\xd2?\xc6\x92_,\xf9\xc5\xd2?\xc6\x92_,\xf9\xc5\xd2?\xecQ\xb8\x1e\x85\xeb\xd1?\xecQ\xb8\x1e\x85\xeb\xd1?\x11\x11\x11\x11\x11\x11\xd1?\xecQ\xb8\x1e\x85\xeb\xd1?\xecQ\xb8\x1e\x85\xeb\xd1?\xecQ\xb8\x1e\x85\xeb\xd1?\xecQ\xb8\x1e\x85\xeb\xd1?\xecQ\xb8\x1e\x85\xeb\xd1?\xecQ\xb8\x1e\x85\xeb\xd1?\xe5\x17K~\xb1\xe4\xc7?O\x1b\xe8\xb4\x81N\xcb?\x03\x9d6\xd0i\x03\xcd?7\xd0i\x03\x9d6\xd0?\x11\x11\x11\x11\x11\x11\xd1?{\x14\xaeG\xe1z\xd4?\xe5\x17K~\xb1\xe4\xd7?\xe5\x17K~\xb1\xe4\xd7?\xbfX\xf2\x8b%\xbf\xd8?\xbfX\xf2\x8b%\xbf\xd8?\x9a\x99\x99\x99\x99\x99\xd9?\x9a\x99\x99\x99\x99\x99\xd9?)\\\x8f\xc2\xf5(\xdc?)\\\x8f\xc2\xf5(\xdc?\xde\xdd\xdd\xdd\xdd\xdd\xdd?\xb8\x1e\x85\xebQ\xb8\xde?\xde\xdd\xdd\xdd\xdd\xdd\xdd?\xb8\x1e\x85\xebQ\xb8\xde?\x93_,\xf9\xc5\x92\xdf?7\xd0i\x03\x9d6\xe0?\xa4p=\n\xd7\xa3\xe0?~\xb1\xe4\x17K~\xe1?~\xb1\xe4\x17K~\xe1?~\xb1\xe4\x17K~\xe1?~\xb1\xe4\x17K~\xe1?~\xb1\xe4\x17K~\xe1?\x11\x11\x11\x11\x11\x11\xe1?\xe5\x17K~\xb1\xe4\xc7?O\x1b\xe8\xb4\x81N\xcb?\xb8\x1e\x85\xebQ\xb8\xce?\xb8\x1e\x85\xebQ\xb8\xce?7\xd0i\x03\x9d6\xd0?\xc6\x92_,\xf9\xc5\xd2?{\x14\xaeG\xe1z\xd4?t\xda@\xa7\rt\xda?t\xda@\xa7\rt\xda?t\xda@\xa7\rt\xda?t\xda@\xa7\rt\xda?O\x1b\xe8\xb4\x81N\xdb?O\x1b\xe8\xb4\x81N\xdb?)\\\x8f\xc2\xf5(\xdc?)\\\x8f\xc2\xf5(\xdc?\x03\x9d6\xd0i\x03\xdd?\xde\xdd\xdd\xdd\xdd\xdd\xdd?\xb8\x1e\x85\xebQ\xb8\xde?\xb8\x1e\x85\xebQ\xb8\xde?\xb8\x1e\x85\xebQ\xb8\xde?\xb8\x1e\x85\xebQ\xb8\xde?\xb8\x1e\x85\xebQ\xb8\xde?\x03\x9d6\xd0i\x03\xdd?\x03\x9d6\xd0i\x03\xdd?\x03\x9d6\xd0i\x03\xdd?\x03\x9d6\xd0i\x03\xdd?\x03\x9d6\xd0i\x03\xdd?\xe5\x17K~\xb1\xe4\xc7?\x03\x9d6\xd0i\x03\xcd?\x03\x9d6\xd0i\x03\xcd?\xecQ\xb8\x1e\x85\xeb\xd1?\xa0\xd3\x06:m\xa0\xd3?\n\xd7\xa3p=\n\xd7?t\xda@\xa7\rt\xda?\xb8\x1e\x85\xebQ\xb8\xde?\x93_,\xf9\xc5\x92\xdf?~\xb1\xe4\x17K~\xe1?~\xb1\xe4\x17K~\xe1?\xecQ\xb8\x1e\x85\xeb\xe1?\xecQ\xb8\x1e\x85\xeb\xe1?\xecQ\xb8\x1e\x85\xeb\xe1?\xecQ\xb8\x1e\x85\xeb\xe1?Y\xf2\x8b%\xbfX\xe2?333333\xe3?\xa0\xd3\x06:m\xa0\xe3?\xa0\xd3\x06:m\xa0\xe3?\x0et\xda@\xa7\r\xe4?\x0et\xda@\xa7\r\xe4?\xe8\xb4\x81N\x1b\xe8\xe4?\xe8\xb4\x81N\x1b\xe8\xe4?\xe8\xb4\x81N\x1b\xe8\xe4?\xe8\xb4\x81N\x1b\xe8\xe4?UUUUUU\xe5?UUUUUU\xe5?\xe5\x17K~\xb1\xe4\xc7?7\xd0i\x03\x9d6\xd0?\xbfX\xf2\x8b%\xbf\xd8?\x93_,\xf9\xc5\x92\xdf?\xc6\x92_,\xf9\xc5\xe2?\xc3\xf5(\\\x8f\xc2\xe5?R\xb8\x1e\x85\xebQ\xe8?\x9a\x99\x99\x99\x99\x99\xe9?O\x1b\xe8\xb4\x81N\xeb?)\\\x8f\xc2\xf5(\xec?\x96\xfcb\xc9/\x96\xec?\x96\xfcb\xc9/\x96\xec?\x03\x9d6\xd0i\x03\xed?\x03\x9d6\xd0i\x03\xed?\x03\x9d6\xd0i\x03\xed?\x03\x9d6\xd0i\x03\xed?\x03\x9d6\xd0i\x03\xed?q=\n\xd7\xa3p\xed?q=\n\xd7\xa3p\xed?q=\n\xd7\xa3p\xed?q=\n\xd7\xa3p\xed?K~\xb1\xe4\x17K\xee?K~\xb1\xe4\x17K\xee?K~\xb1\xe4\x17K\xee?K~\xb1\xe4\x17K\xee?K~\xb1\xe4\x17K\xee?K~\xb1\xe4\x17K\xee?\xe5\x17K~\xb1\xe4\xc7?\xb8\x1e\x85\xebQ\xb8\xce?UUUUUU\xd5?\x03\x9d6\xd0i\x03\xdd?7\xd0i\x03\x9d6\xe0?\xe8\xb4\x81N\x1b\xe8\xe4?\n\xd7\xa3p=\n\xe7?R\xb8\x1e\x85\xebQ\xe8?\x07:m\xa0\xd3\x06\xea?\xe1z\x14\xaeG\xe1\xea?\xbc\xbb\xbb\xbb\xbb\xbb\xeb?)\\\x8f\xc2\xf5(\xec?\x96\xfcb\xc9/\x96\xec?\x96\xfcb\xc9/\x96\xec?q=\n\xd7\xa3p\xed?\xb8\x1e\x85\xebQ\xb8\xee?\xb8\x1e\x85\xebQ\xb8\xee?\xb8\x1e\x85\xebQ\xb8\xee?&\xbfX\xf2\x8b%\xef?&\xbfX\xf2\x8b%\xef?&\xbfX\xf2\x8b%\xef?&\xbfX\xf2\x8b%\xef?&\xbfX\xf2\x8b%\xef?&\xbfX\xf2\x8b%\xef?&\xbfX\xf2\x8b%\xef?&\xbfX\xf2\x8b%\xef?&\xbfX\xf2\x8b%\xef?\xe5\x17K~\xb1\xe4\xc7?7\xd0i\x03\x9d6\xd0?UUUUUU\xd5?\xc6\x92_,\xf9\xc5\xe2?wwwwww\xe7?,\xf9\xc5\x92_,\xe9?\x9a\x99\x99\x99\x99\x99\xe9?O\x1b\xe8\xb4\x81N\xeb?\x03\x9d6\xd0i\x03\xed?q=\n\xd7\xa3p\xed?\xde\xdd\xdd\xdd\xdd\xdd\xed?K~\xb1\xe4\x17K\xee?K~\xb1\xe4\x17K\xee?\xb8\x1e\x85\xebQ\xb8\xee?\xb8\x1e\x85\xebQ\xb8\xee?\xb8\x1e\x85\xebQ\xb8\xee?\xb8\x1e\x85\xebQ\xb8\xee?\xb8\x1e\x85\xebQ\xb8\xee?&\xbfX\xf2\x8b%\xef?&\xbfX\xf2\x8b%\xef?&\xbfX\xf2\x8b%\xef?&\xbfX\xf2\x8b%\xef?&\xbfX\xf2\x8b%\xef?&\xbfX\xf2\x8b%\xef?&\xbfX\xf2\x8b%\xef?&\xbfX\xf2\x8b%\xef?\x93_,\xf9\xc5\x92\xef?\xe5\x17K~\xb1\xe4\xc7?\xc6\x92_,\xf9\xc5\xd2?\xecQ\xb8\x1e\x85\xeb\xe1?wwwwww\xe7?t\xda@\xa7\rt\xea?)\\\x8f\xc2\xf5(\xec?\xde\xdd\xdd\xdd\xdd\xdd\xed?\xde\xdd\xdd\xdd\xdd\xdd\xed?K~\xb1\xe4\x17K\xee?&\xbfX\xf2\x8b%\xef?&\xbfX\xf2\x8b%\xef?&\xbfX\xf2\x8b%\xef?\x93_,\xf9\xc5\x92\xef?\x00\x00\x00\x00\x00\x00\xf0?\x00\x00\x00\x00\x00\x00\xf0?\x00\x00\x00\x00\x00\x00\xf0?\x00\x00\x00\x00\x00\x00\xf0?\x00\x00\x00\x00\x00\x00\xf0?\x00\x00\x00\x00\x00\x00\xf0?\x00\x00\x00\x00\x00\x00\xf0?\x00\x00\x00\x00\x00\x00\xf0?\x00\x00\x00\x00\x00\x00\xf0?\x00\x00\x00\x00\x00\x00\xf0?\x00\x00\x00\x00\x00\x00\xf0?\x00\x00\x00\x00\x00\x00\xf0?\x00\x00\x00\x00\x00\x00\xf0?\x00\x00\x00\x00\x00\x00\xf0?\xe5\x17K~\xb1\xe4\xc7?\xa0\xd3\x06:m\xa0\xd3?7\xd0i\x03\x9d6\xe0?R\xb8\x1e\x85\xebQ\xe8?\xbc\xbb\xbb\xbb\xbb\xbb\xeb?q=\n\xd7\xa3p\xed?\xde\xdd\xdd\xdd\xdd\xdd\xed?\xb8\x1e\x85\xebQ\xb8\xee?\x93_,\xf9\xc5\x92\xef?\x00\x00\x00\x00\x00\x00\xf0?\x00\x00\x00\x00\x00\x00\xf0?\x00\x00\x00\x00\x00\x00\xf0?\x00\x00\x00\x00\x00\x00\xf0?\x00\x00\x00\x00\x00\x00\xf0?\x00\x00\x00\x00\x00\x00\xf0?\x00\x00\x00\x00\x00\x00\xf0?\x00\x00\x00\x00\x00\x00\xf0?\x00\x00\x00\x00\x00\x00\xf0?\x00\x00\x00\x00\x00\x00\xf0?\x00\x00\x00\x00\x00\x00\xf0?\x00\x00\x00\x00\x00\x00\xf0?\x00\x00\x00\x00\x00\x00\xf0?\x00\x00\x00\x00\x00\x00\xf0?\x00\x00\x00\x00\x00\x00\xf0?\x00\x00\x00\x00\x00\x00\xf0?\x00\x00\x00\x00\x00\x00\xf0?\x00\x00\x00\x00\x00\x00\xf0?\xe5\x17K~\xb1\xe4\xc7?\xecQ\xb8\x1e\x85\xeb\xd1?\x11\x11\x11\x11\x11\x11\xe1?wwwwww\xe7?O\x1b\xe8\xb4\x81N\xeb?\x96\xfcb\xc9/\x96\xec?\xde\xdd\xdd\xdd\xdd\xdd\xed?\xb8\x1e\x85\xebQ\xb8\xee?&\xbfX\xf2\x8b%\xef?\x00\x00\x00\x00\x00\x00\xf0?\x00\x00\x00\x00\x00\x00\xf0?\x00\x00\x00\x00\x00\x00\xf0?\x00\x00\x00\x00\x00\x00\xf0?\x00\x00\x00\x00\x00\x00\xf0?\x00\x00\x00\x00\x00\x00\xf0?\x00\x00\x00\x00\x00\x00\xf0?\x00\x00\x00\x00\x00\x00\xf0?\x00\x00\x00\x00\x00\x00\xf0?\x00\x00\x00\x00\x00\x00\xf0?\x00\x00\x00\x00\x00\x00\xf0?\x00\x00\x00\x00\x00\x00\xf0?\x00\x00\x00\x00\x00\x00\xf0?\x00\x00\x00\x00\x00\x00\xf0?\x00\x00\x00\x00\x00\x00\xf0?\x00\x00\x00\x00\x00\x00\xf0?\x00\x00\x00\x00\x00\x00\xf0?\x00\x00\x00\x00\x00\x00\xf0?\xe5\x17K~\xb1\xe4\xc7?\x11\x11\x11\x11\x11\x11\xd1?\xde\xdd\xdd\xdd\xdd\xdd\xdd?{\x14\xaeG\xe1z\xe4?\xbfX\xf2\x8b%\xbf\xe8?\xbc\xbb\xbb\xbb\xbb\xbb\xeb?\x03\x9d6\xd0i\x03\xed?\xde\xdd\xdd\xdd\xdd\xdd\xed?\xb8\x1e\x85\xebQ\xb8\xee?\xb8\x1e\x85\xebQ\xb8\xee?\xb8\x1e\x85\xebQ\xb8\xee?&\xbfX\xf2\x8b%\xef?\x93_,\xf9\xc5\x92\xef?\x00\x00\x00\x00\x00\x00\xf0?\x00\x00\x00\x00\x00\x00\xf0?\x00\x00\x00\x00\x00\x00\xf0?\x00\x00\x00\x00\x00\x00\xf0?\x00\x00\x00\x00\x00\x00\xf0?\x00\x00\x00\x00\x00\x00\xf0?\x00\x00\x00\x00\x00\x00\xf0?\x00\x00\x00\x00\x00\x00\xf0?\x00\x00\x00\x00\x00\x00\xf0?\x00\x00\x00\x00\x00\x00\xf0?\x00\x00\x00\x00\x00\x00\xf0?\x00\x00\x00\x00\x00\x00\xf0?\x00\x00\x00\x00\x00\x00\xf0?\x00\x00\x00\x00\x00\x00\xf0?{\x14\xaeG\xe1z\xa4?{\x14\xaeG\xe1z\xa4?{\x14\xaeG\xe1z\xa4?{\x14\xaeG\xe1z\xa4?{\x14\xaeG\xe1z\xa4?{\x14\xaeG\xe1z\xa4?{\x14\xaeG\xe1z\xa4?{\x14\xaeG\xe1z\xa4?{\x14\xaeG\xe1z\xa4?O\x1b\xe8\xb4\x81N\x9b?O\x1b\xe8\xb4\x81N\x9b?O\x1b\xe8\xb4\x81N\x9b?O\x1b\xe8\xb4\x81N\x8b?O\x1b\xe8\xb4\x81N\x8b?O\x1b\xe8\xb4\x81N\x8b?O\x1b\xe8\xb4\x81N\x8b?\x00\x00\x00\x00\x00\x00\x00\x00\x00\x00\x00\x00\x00\x00\x00\x00\x00\x00\x00\x00\x00\x00\x00\x00\x00\x00\x00\x00\x00\x00\x00\x00\x00\x00\x00\x00\x00\x00\x00\x00\x00\x00\x00\x00\x00\x00\x00\x00\x00\x00\x00\x00\x00\x00\x00\x00\x00\x00\x00\x00\x00\x00\x00\x00\x00\x00\x00\x00\x00\x00\x00\x00\x00\x00\x00\x00\x00\x00\x00\x00\x00\x00\x00\x00\x00\x00\x00\x00{\x14\xaeG\xe1z\xa4?{\x14\xaeG\xe1z\xa4?{\x14\xaeG\xe1z\xa4?{\x14\xaeG\xe1z\xa4?{\x14\xaeG\xe1z\xa4?{\x14\xaeG\xe1z\xa4?{\x14\xaeG\xe1z\xa4?{\x14\xaeG\xe1z\xa4?{\x14\xaeG\xe1z\xa4?O\x1b\xe8\xb4\x81N\x9b?O\x1b\xe8\xb4\x81N\x8b?O\x1b\xe8\xb4\x81N\x8b?O\x1b\xe8\xb4\x81N\x8b?\x00\x00\x00\x00\x00\x00\x00\x00\x00\x00\x00\x00\x00\x00\x00\x00\x00\x00\x00\x00\x00\x00\x00\x00\x00\x00\x00\x00\x00\x00\x00\x00\x00\x00\x00\x00\x00\x00\x00\x00\x00\x00\x00\x00\x00\x00\x00\x00\x00\x00\x00\x00\x00\x00\x00\x00\x00\x00\x00\x00\x00\x00\x00\x00\x00\x00\x00\x00\x00\x00\x00\x00\x00\x00\x00\x00\x00\x00\x00\x00\x00\x00\x00\x00\x00\x00\x00\x00\x00\x00\x00\x00\x00\x00\x00\x00\x00\x00\x00\x00\x00\x00\x00\x00\x00\x00\x00\x00\x00\x00\x00\x00{\x14\xaeG\xe1z\xa4?{\x14\xaeG\xe1z\xa4?{\x14\xaeG\xe1z\xa4?{\x14\xaeG\xe1z\xa4?{\x14\xaeG\xe1z\xa4?{\x14\xaeG\xe1z\xa4?{\x14\xaeG\xe1z\xa4?{\x14\xaeG\xe1z\xa4?{\x14\xaeG\xe1z\xa4?O\x1b\xe8\xb4\x81N\x9b?O\x1b\xe8\xb4\x81N\x9b?O\x1b\xe8\xb4\x81N\x9b?O\x1b\xe8\xb4\x81N\x9b?O\x1b\xe8\xb4\x81N\x9b?O\x1b\xe8\xb4\x81N\x8b?O\x1b\xe8\xb4\x81N\x8b?\x00\x00\x00\x00\x00\x00\x00\x00\x00\x00\x00\x00\x00\x00\x00\x00\x00\x00\x00\x00\x00\x00\x00\x00\x00\x00\x00\x00\x00\x00\x00\x00\x00\x00\x00\x00\x00\x00\x00\x00\x00\x00\x00\x00\x00\x00\x00\x00\x00\x00\x00\x00\x00\x00\x00\x00\x00\x00\x00\x00\x00\x00\x00\x00\x00\x00\x00\x00\x00\x00\x00\x00\x00\x00\x00\x00\x00\x00\x00\x00\x00\x00\x00\x00\x00\x00\x00\x00{\x14\xaeG\xe1z\xa4?{\x14\xaeG\xe1z\xa4?{\x14\xaeG\xe1z\xa4?{\x14\xaeG\xe1z\xa4?{\x14\xaeG\xe1z\xa4?{\x14\xaeG\xe1z\xa4?{\x14\xaeG\xe1z\xa4?{\x14\xaeG\xe1z\xa4?{\x14\xaeG\xe1z\xa4?O\x1b\xe8\xb4\x81N\x9b?O\x1b\xe8\xb4\x81N\x9b?O\x1b\xe8\xb4\x81N\x8b?\x00\x00\x00\x00\x00\x00\x00\x00\x00\x00\x00\x00\x00\x00\x00\x00\x00\x00\x00\x00\x00\x00\x00\x00\x00\x00\x00\x00\x00\x00\x00\x00\x00\x00\x00\x00\x00\x00\x00\x00\x00\x00\x00\x00\x00\x00\x00\x00\x00\x00\x00\x00\x00\x00\x00\x00\x00\x00\x00\x00\x00\x00\x00\x00\x00\x00\x00\x00\x00\x00\x00\x00\x00\x00\x00\x00\x00\x00\x00\x00\x00\x00\x00\x00\x00\x00\x00\x00\x00\x00\x00\x00\x00\x00\x00\x00\x00\x00\x00\x00\x00\x00\x00\x00\x00\x00\x00\x00\x00\x00\x00\x00\x00\x00\x00\x00\x00\x00\x00\x00{\x14\xaeG\xe1z\xa4?{\x14\xaeG\xe1z\xa4?{\x14\xaeG\xe1z\xa4?{\x14\xaeG\xe1z\xa4?{\x14\xaeG\xe1z\xa4?{\x14\xaeG\xe1z\xa4?{\x14\xaeG\xe1z\xa4?O\x1b\xe8\xb4\x81N\x9b?O\x1b\xe8\xb4\x81N\x9b?\x00\x00\x00\x00\x00\x00\x00\x00\x00\x00\x00\x00\x00\x00\x00\x00\x00\x00\x00\x00\x00\x00\x00\x00\x00\x00\x00\x00\x00\x00\x00\x00\x00\x00\x00\x00\x00\x00\x00\x00\x00\x00\x00\x00\x00\x00\x00\x00\x00\x00\x00\x00\x00\x00\x00\x00\x00\x00\x00\x00\x00\x00\x00\x00\x00\x00\x00\x00\x00\x00\x00\x00\x00\x00\x00\x00\x00\x00\x00\x00\x00\x00\x00\x00\x00\x00\x00\x00\x00\x00\x00\x00\x00\x00\x00\x00\x00\x00\x00\x00\x00\x00\x00\x00\x00\x00\x00\x00\x00\x00\x00\x00\x00\x00\x00\x00\x00\x00\x00\x00\x00\x00\x00\x00\x00\x00\x00\x00\x00\x00\x00\x00\x00\x00\x00\x00\x00\x00\x00\x00\x00\x00\x00\x00{\x14\xaeG\xe1z\xa4?{\x14\xaeG\xe1z\xa4?{\x14\xaeG\xe1z\xa4?{\x14\xaeG\xe1z\xa4?{\x14\xaeG\xe1z\xa4?{\x14\xaeG\xe1z\xa4?{\x14\xaeG\xe1z\xa4?{\x14\xaeG\xe1z\xa4?{\x14\xaeG\xe1z\xa4?{\x14\xaeG\xe1z\xa4?{\x14\xaeG\xe1z\xa4?{\x14\xaeG\xe1z\xa4?{\x14\xaeG\xe1z\xa4?O\x1b\xe8\xb4\x81N\x9b?O\x1b\xe8\xb4\x81N\x9b?O\x1b\xe8\xb4\x81N\x8b?O\x1b\xe8\xb4\x81N\x8b?\x00\x00\x00\x00\x00\x00\x00\x00\x00\x00\x00\x00\x00\x00\x00\x00\x00\x00\x00\x00\x00\x00\x00\x00\x00\x00\x00\x00\x00\x00\x00\x00\x00\x00\x00\x00\x00\x00\x00\x00\x00\x00\x00\x00\x00\x00\x00\x00\x00\x00\x00\x00\x00\x00\x00\x00\x00\x00\x00\x00\x00\x00\x00\x00\x00\x00\x00\x00\x00\x00\x00\x00\x00\x00\x00\x00\x00\x00\x00\x00{\x14\xaeG\xe1z\xa4?{\x14\xaeG\xe1z\xa4?{\x14\xaeG\xe1z\xa4?{\x14\xaeG\xe1z\xa4?O\x1b\xe8\xb4\x81N\xab?O\x1b\xe8\xb4\x81N\xab?\x11\x11\x11\x11\x11\x11\xb1?{\x14\xaeG\xe1z\xb4?{\x14\xaeG\xe1z\xb4?O\x1b\xe8\xb4\x81N\xab?O\x1b\xe8\xb4\x81N\xab?O\x1b\xe8\xb4\x81N\xab?{\x14\xaeG\xe1z\xa4?{\x14\xaeG\xe1z\xa4?O\x1b\xe8\xb4\x81N\x9b?O\x1b\xe8\xb4\x81N\x9b?O\x1b\xe8\xb4\x81N\x8b?O\x1b\xe8\xb4\x81N\x8b?\x00\x00\x00\x00\x00\x00\x00\x00\x00\x00\x00\x00\x00\x00\x00\x00\x00\x00\x00\x00\x00\x00\x00\x00\x00\x00\x00\x00\x00\x00\x00\x00\x00\x00\x00\x00\x00\x00\x00\x00\x00\x00\x00\x00\x00\x00\x00\x00\x00\x00\x00\x00\x00\x00\x00\x00\x00\x00\x00\x00\x00\x00\x00\x00\x00\x00\x00\x00\x00\x00\x00\x00{\x14\xaeG\xe1z\xa4?{\x14\xaeG\xe1z\xa4?{\x14\xaeG\xe1z\xa4?\x11\x11\x11\x11\x11\x11\xb1?\x11\x11\x11\x11\x11\x11\xb1?\x11\x11\x11\x11\x11\x11\xb1?{\x14\xaeG\xe1z\xb4?{\x14\xaeG\xe1z\xb4?{\x14\xaeG\xe1z\xb4?{\x14\xaeG\xe1z\xb4?\x11\x11\x11\x11\x11\x11\xb1?{\x14\xaeG\xe1z\xb4?\xb8\x1e\x85\xebQ\xb8\xbe?\x11\x11\x11\x11\x11\x11\xc1?\xb8\x1e\x85\xebQ\xb8\xbe?\x11\x11\x11\x11\x11\x11\xc1?\x11\x11\x11\x11\x11\x11\xc1?\xb8\x1e\x85\xebQ\xb8\xbe?\x11\x11\x11\x11\x11\x11\xc1?\x11\x11\x11\x11\x11\x11\xc1?\x11\x11\x11\x11\x11\x11\xc1?\x11\x11\x11\x11\x11\x11\xc1?\x11\x11\x11\x11\x11\x11\xc1?\xb8\x1e\x85\xebQ\xb8\xbe?\xb8\x1e\x85\xebQ\xb8\xbe?\xe5\x17K~\xb1\xe4\xb7?{\x14\xaeG\xe1z\xb4?{\x14\xaeG\xe1z\xa4?{\x14\xaeG\xe1z\xa4?O\x1b\xe8\xb4\x81N\xab?\x11\x11\x11\x11\x11\x11\xb1?\x11\x11\x11\x11\x11\x11\xb1?\x11\x11\x11\x11\x11\x11\xb1?O\x1b\xe8\xb4\x81N\xbb?\x11\x11\x11\x11\x11\x11\xc1?{\x14\xaeG\xe1z\xc4?\xe5\x17K~\xb1\xe4\xc7?\x9a\x99\x99\x99\x99\x99\xc9?\x11\x11\x11\x11\x11\x11\xd1?\xa0\xd3\x06:m\xa0\xd3?0\x96\xfcb\xc9/\xd6?\x9a\x99\x99\x99\x99\x99\xd9?t\xda@\xa7\rt\xda?)\\\x8f\xc2\xf5(\xdc?\x03\x9d6\xd0i\x03\xdd?\x03\x9d6\xd0i\x03\xdd?\xde\xdd\xdd\xdd\xdd\xdd\xdd?\xb8\x1e\x85\xebQ\xb8\xde?7\xd0i\x03\x9d6\xe0?\x11\x11\x11\x11\x11\x11\xe1?\xecQ\xb8\x1e\x85\xeb\xe1?\xc6\x92_,\xf9\xc5\xe2?\xc6\x92_,\xf9\xc5\xe2?\x0et\xda@\xa7\r\xe4?{\x14\xaeG\xe1z\xa4?\x11\x11\x11\x11\x11\x11\xb1?\x11\x11\x11\x11\x11\x11\xb1?{\x14\xaeG\xe1z\xb4?\xb8\x1e\x85\xebQ\xb8\xbe?\xb8\x1e\x85\xebQ\xb8\xce?\n\xd7\xa3p=\n\xd7?)\\\x8f\xc2\xf5(\xdc?\xc6\x92_,\xf9\xc5\xe2?\xa0\xd3\x06:m\xa0\xe3?\xe8\xb4\x81N\x1b\xe8\xe4?\xe8\xb4\x81N\x1b\xe8\xe4?\x9d6\xd0i\x03\x9d\xe6?\xe5\x17K~\xb1\xe4\xe7?\xe1z\x14\xaeG\xe1\xea?\x96\xfcb\xc9/\x96\xec?\x03\x9d6\xd0i\x03\xed?q=\n\xd7\xa3p\xed?q=\n\xd7\xa3p\xed?\xde\xdd\xdd\xdd\xdd\xdd\xed?\xde\xdd\xdd\xdd\xdd\xdd\xed?\xde\xdd\xdd\xdd\xdd\xdd\xed?\xde\xdd\xdd\xdd\xdd\xdd\xed?\xde\xdd\xdd\xdd\xdd\xdd\xed?\xde\xdd\xdd\xdd\xdd\xdd\xed?\xde\xdd\xdd\xdd\xdd\xdd\xed?\xde\xdd\xdd\xdd\xdd\xdd\xed?{\x14\xaeG\xe1z\xa4?O\x1b\xe8\xb4\x81N\xab?\x11\x11\x11\x11\x11\x11\xb1?\xe5\x17K~\xb1\xe4\xb7?{\x14\xaeG\xe1z\xc4?\xb8\x1e\x85\xebQ\xb8\xce?0\x96\xfcb\xc9/\xd6?\xbfX\xf2\x8b%\xbf\xd8?7\xd0i\x03\x9d6\xe0?Y\xf2\x8b%\xbfX\xe2?\xe8\xb4\x81N\x1b\xe8\xe4?UUUUUU\xe5?\n\xd7\xa3p=\n\xe7?\xe5\x17K~\xb1\xe4\xe7?t\xda@\xa7\rt\xea?)\\\x8f\xc2\xf5(\xec?\x03\x9d6\xd0i\x03\xed?\x03\x9d6\xd0i\x03\xed?\xde\xdd\xdd\xdd\xdd\xdd\xed?K~\xb1\xe4\x17K\xee?\xb8\x1e\x85\xebQ\xb8\xee?\xb8\x1e\x85\xebQ\xb8\xee?&\xbfX\xf2\x8b%\xef?\x93_,\xf9\xc5\x92\xef?\x93_,\xf9\xc5\x92\xef?\x93_,\xf9\xc5\x92\xef?\x93_,\xf9\xc5\x92\xef?{\x14\xaeG\xe1z\xa4?O\x1b\xe8\xb4\x81N\xab?\x11\x11\x11\x11\x11\x11\xb1?O\x1b\xe8\xb4\x81N\xbb?\x03\x9d6\xd0i\x03\xcd?\xc6\x92_,\xf9\xc5\xd2?\xde\xdd\xdd\xdd\xdd\xdd\xdd?\xa4p=\n\xd7\xa3\xe0?\x0et\xda@\xa7\r\xe4?\n\xd7\xa3p=\n\xe7?R\xb8\x1e\x85\xebQ\xe8?\xbfX\xf2\x8b%\xbf\xe8?\x07:m\xa0\xd3\x06\xea?O\x1b\xe8\xb4\x81N\xeb?)\\\x8f\xc2\xf5(\xec?q=\n\xd7\xa3p\xed?\xb8\x1e\x85\xebQ\xb8\xee?\xb8\x1e\x85\xebQ\xb8\xee?\xb8\x1e\x85\xebQ\xb8\xee?&\xbfX\xf2\x8b%\xef?\x93_,\xf9\xc5\x92\xef?\x00\x00\x00\x00\x00\x00\xf0?\x00\x00\x00\x00\x00\x00\xf0?\x00\x00\x00\x00\x00\x00\xf0?\x00\x00\x00\x00\x00\x00\xf0?\x00\x00\x00\x00\x00\x00\xf0?\x00\x00\x00\x00\x00\x00\xf0?{\x14\xaeG\xe1z\xa4?\x11\x11\x11\x11\x11\x11\xb1?{\x14\xaeG\xe1z\xb4?\xb8\x1e\x85\xebQ\xb8\xbe?\x03\x9d6\xd0i\x03\xcd?{\x14\xaeG\xe1z\xd4?t\xda@\xa7\rt\xda?7\xd0i\x03\x9d6\xe0?\xc6\x92_,\xf9\xc5\xe2?\xe8\xb4\x81N\x1b\xe8\xe4?\xc3\xf5(\\\x8f\xc2\xe5?\x9d6\xd0i\x03\x9d\xe6?wwwwww\xe7?R\xb8\x1e\x85\xebQ\xe8?\x07:m\xa0\xd3\x06\xea?O\x1b\xe8\xb4\x81N\xeb?)\\\x8f\xc2\xf5(\xec?q=\n\xd7\xa3p\xed?K~\xb1\xe4\x17K\xee?\xb8\x1e\x85\xebQ\xb8\xee?&\xbfX\xf2\x8b%\xef?&\xbfX\xf2\x8b%\xef?&\xbfX\xf2\x8b%\xef?\x93_,\xf9\xc5\x92\xef?\x93_,\xf9\xc5\x92\xef?\x00\x00\x00\x00\x00\x00\xf0?\x00\x00\x00\x00\x00\x00\xf0?\x11\x11\x11\x11\x11\x11\xc1?\xc6\x92_,\xf9\xc5\xc2?{\x14\xaeG\xe1z\xc4?\xc6\x92_,\xf9\xc5\xc2?\x11\x11\x11\x11\x11\x11\xc1?O\x1b\xe8\xb4\x81N\xbb?\xe5\x17K~\xb1\xe4\xb7?{\x14\xaeG\xe1z\xb4?{\x14\xaeG\xe1z\xb4?\x11\x11\x11\x11\x11\x11\xb1?O\x1b\xe8\xb4\x81N\xab?{\x14\xaeG\xe1z\xa4?{\x14\xaeG\xe1z\xa4?{\x14\xaeG\xe1z\xa4?O\x1b\xe8\xb4\x81N\x9b?O\x1b\xe8\xb4\x81N\x9b?O\x1b\xe8\xb4\x81N\x9b?O\x1b\xe8\xb4\x81N\x8b?O\x1b\xe8\xb4\x81N\x8b?O\x1b\xe8\xb4\x81N\x8b?O\x1b\xe8\xb4\x81N\x8b?O\x1b\xe8\xb4\x81N\x8b?O\x1b\xe8\xb4\x81N\x8b?O\x1b\xe8\xb4\x81N\x8b?O\x1b\xe8\xb4\x81N\x8b?O\x1b\xe8\xb4\x81N\x8b?\x00\x00\x00\x00\x00\x00\x00\x00\x11\x11\x11\x11\x11\x11\xc1?{\x14\xaeG\xe1z\xc4?\xc6\x92_,\xf9\xc5\xc2?\x11\x11\x11\x11\x11\x11\xc1?\xb8\x1e\x85\xebQ\xb8\xbe?{\x14\xaeG\xe1z\xb4?\x11\x11\x11\x11\x11\x11\xb1?{\x14\xaeG\xe1z\xa4?O\x1b\xe8\xb4\x81N\x8b?O\x1b\xe8\xb4\x81N\x8b?O\x1b\xe8\xb4\x81N\x8b?\x00\x00\x00\x00\x00\x00\x00\x00\x00\x00\x00\x00\x00\x00\x00\x00\x00\x00\x00\x00\x00\x00\x00\x00\x00\x00\x00\x00\x00\x00\x00\x00\x00\x00\x00\x00\x00\x00\x00\x00\x00\x00\x00\x00\x00\x00\x00\x00\x00\x00\x00\x00\x00\x00\x00\x00\x00\x00\x00\x00\x00\x00\x00\x00\x00\x00\x00\x00\x00\x00\x00\x00\x00\x00\x00\x00\x00\x00\x00\x00\x00\x00\x00\x00\x00\x00\x00\x00\x00\x00\x00\x00\x00\x00\x00\x00\x00\x00\x00\x00\x00\x00\x00\x00\x00\x00\x00\x00\x00\x00\x00\x00\x00\x00\x00\x00\x00\x00\x00\x00\x00\x00\x00\x00\x00\x00\x00\x00\x11\x11\x11\x11\x11\x11\xc1?\x11\x11\x11\x11\x11\x11\xc1?\x11\x11\x11\x11\x11\x11\xc1?\x11\x11\x11\x11\x11\x11\xc1?\x11\x11\x11\x11\x11\x11\xc1?{\x14\xaeG\xe1z\xb4?O\x1b\xe8\xb4\x81N\xab?O\x1b\xe8\xb4\x81N\x9b?O\x1b\xe8\xb4\x81N\x9b?O\x1b\xe8\xb4\x81N\x8b?O\x1b\xe8\xb4\x81N\x8b?O\x1b\xe8\xb4\x81N\x8b?O\x1b\xe8\xb4\x81N\x9b?\x00\x00\x00\x00\x00\x00\x00\x00\x00\x00\x00\x00\x00\x00\x00\x00\x00\x00\x00\x00\x00\x00\x00\x00\x00\x00\x00\x00\x00\x00\x00\x00\x00\x00\x00\x00\x00\x00\x00\x00\x00\x00\x00\x00\x00\x00\x00\x00\x00\x00\x00\x00\x00\x00\x00\x00\x00\x00\x00\x00\x00\x00\x00\x00\x00\x00\x00\x00\x00\x00\x00\x00\x00\x00\x00\x00\x00\x00\x00\x00\x00\x00\x00\x00\x00\x00\x00\x00\x00\x00\x00\x00\x00\x00\x00\x00\x00\x00\x00\x00\x00\x00\x00\x00\x00\x00\x00\x00\x00\x00\x00\x00\x11\x11\x11\x11\x11\x11\xc1?{\x14\xaeG\xe1z\xc4?0\x96\xfcb\xc9/\xc6?\xe5\x17K~\xb1\xe4\xc7?\xb8\x1e\x85\xebQ\xb8\xce?{\x14\xaeG\xe1z\xc4?\xc6\x92_,\xf9\xc5\xc2?\x11\x11\x11\x11\x11\x11\xb1?O\x1b\xe8\xb4\x81N\x9b?\x00\x00\x00\x00\x00\x00\x00\x00\x00\x00\x00\x00\x00\x00\x00\x00\x00\x00\x00\x00\x00\x00\x00\x00\x00\x00\x00\x00\x00\x00\x00\x00\x00\x00\x00\x00\x00\x00\x00\x00\x00\x00\x00\x00\x00\x00\x00\x00\x00\x00\x00\x00\x00\x00\x00\x00\x00\x00\x00\x00\x00\x00\x00\x00\x00\x00\x00\x00\x00\x00\x00\x00\x00\x00\x00\x00\x00\x00\x00\x00\x00\x00\x00\x00\x00\x00\x00\x00\x00\x00\x00\x00\x00\x00\x00\x00\x00\x00\x00\x00\x00\x00\x00\x00\x00\x00\x00\x00\x00\x00\x00\x00\x00\x00\x00\x00\x00\x00\x00\x00\x00\x00\x00\x00\x00\x00\x00\x00\x00\x00\x00\x00\x00\x00\x00\x00\x00\x00\x00\x00\x00\x00\x00\x00\x11\x11\x11\x11\x11\x11\xc1?{\x14\xaeG\xe1z\xc4?\xe5\x17K~\xb1\xe4\xc7?O\x1b\xe8\xb4\x81N\xcb?\xb8\x1e\x85\xebQ\xb8\xce?\x9a\x99\x99\x99\x99\x99\xc9?\x9a\x99\x99\x99\x99\x99\xc9?\xc6\x92_,\xf9\xc5\xc2?O\x1b\xe8\xb4\x81N\xbb?\xe5\x17K~\xb1\xe4\xb7?O\x1b\xe8\xb4\x81N\xab?{\x14\xaeG\xe1z\xa4?O\x1b\xe8\xb4\x81N\x9b?O\x1b\xe8\xb4\x81N\x8b?\x00\x00\x00\x00\x00\x00\x00\x00\x00\x00\x00\x00\x00\x00\x00\x00\x00\x00\x00\x00\x00\x00\x00\x00\x00\x00\x00\x00\x00\x00\x00\x00\x00\x00\x00\x00\x00\x00\x00\x00\x00\x00\x00\x00\x00\x00\x00\x00\x00\x00\x00\x00\x00\x00\x00\x00\x00\x00\x00\x00\x00\x00\x00\x00\x00\x00\x00\x00\x00\x00\x00\x00\x00\x00\x00\x00\x00\x00\x00\x00\x00\x00\x00\x00\x00\x00\x00\x00\x00\x00\x00\x00\x00\x00\x00\x00\x00\x00\x00\x00\x00\x00\x00\x00\x11\x11\x11\x11\x11\x11\xc1?{\x14\xaeG\xe1z\xc4?\xe5\x17K~\xb1\xe4\xc7?O\x1b\xe8\xb4\x81N\xcb?\x03\x9d6\xd0i\x03\xcd?\x11\x11\x11\x11\x11\x11\xd1?\xa0\xd3\x06:m\xa0\xd3?{\x14\xaeG\xe1z\xd4?\xa0\xd3\x06:m\xa0\xd3?\xa0\xd3\x06:m\xa0\xd3?\x03\x9d6\xd0i\x03\xcd?\xe5\x17K~\xb1\xe4\xc7?\xc6\x92_,\xf9\xc5\xc2?\x11\x11\x11\x11\x11\x11\xc1?O\x1b\xe8\xb4\x81N\xbb?\x11\x11\x11\x11\x11\x11\xb1?O\x1b\xe8\xb4\x81N\xab?{\x14\xaeG\xe1z\xa4?{\x14\xaeG\xe1z\xa4?\x11\x11\x11\x11\x11\x11\xb1?\xe5\x17K~\xb1\xe4\xb7?\xe5\x17K~\xb1\xe4\xb7?\xe5\x17K~\xb1\xe4\xb7?\xe5\x17K~\xb1\xe4\xb7?\xe5\x17K~\xb1\xe4\xb7?\xe5\x17K~\xb1\xe4\xb7?\xb8\x1e\x85\xebQ\xb8\xbe?\x11\x11\x11\x11\x11\x11\xc1?\xe5\x17K~\xb1\xe4\xc7?\x11\x11\x11\x11\x11\x11\xd1?\xa0\xd3\x06:m\xa0\xd3?\xbfX\xf2\x8b%\xbf\xd8?\xb8\x1e\x85\xebQ\xb8\xde?\x11\x11\x11\x11\x11\x11\xe1?\x93_,\xf9\xc5\x92\xdf?7\xd0i\x03\x9d6\xe0?t\xda@\xa7\rt\xda?\xa0\xd3\x06:m\xa0\xd3?\x11\x11\x11\x11\x11\x11\xd1?\xecQ\xb8\x1e\x85\xeb\xd1?\xc6\x92_,\xf9\xc5\xd2?\xa0\xd3\x06:m\xa0\xd3?UUUUUU\xd5?\xbfX\xf2\x8b%\xbf\xd8?\xbfX\xf2\x8b%\xbf\xd8?t\xda@\xa7\rt\xda?\x03\x9d6\xd0i\x03\xdd?\x93_,\xf9\xc5\x92\xdf?~\xb1\xe4\x17K~\xe1?Y\xf2\x8b%\xbfX\xe2?\xc6\x92_,\xf9\xc5\xe2?\xc6\x92_,\xf9\xc5\xe2?333333\xe3?\xe8\xb4\x81N\x1b\xe8\xe4?\x11\x11\x11\x11\x11\x11\xc1?{\x14\xaeG\xe1z\xc4?\xe5\x17K~\xb1\xe4\xc7?7\xd0i\x03\x9d6\xd0?\xecQ\xb8\x1e\x85\xeb\xd1?\xecQ\xb8\x1e\x85\xeb\xd1?\xa0\xd3\x06:m\xa0\xd3?\xe5\x17K~\xb1\xe4\xd7?\x9a\x99\x99\x99\x99\x99\xd9?\x03\x9d6\xd0i\x03\xdd?\x11\x11\x11\x11\x11\x11\xe1?\xecQ\xb8\x1e\x85\xeb\xe1?\xa4p=\n\xd7\xa3\xe0?7\xd0i\x03\x9d6\xe0?7\xd0i\x03\x9d6\xe0?\x93_,\xf9\xc5\x92\xdf?\xa4p=\n\xd7\xa3\xe0?\xb8\x1e\x85\xebQ\xb8\xde?\x03\x9d6\xd0i\x03\xdd?O\x1b\xe8\xb4\x81N\xdb?)\\\x8f\xc2\xf5(\xdc?O\x1b\xe8\xb4\x81N\xdb?t\xda@\xa7\rt\xda?\xbfX\xf2\x8b%\xbf\xd8?\xbfX\xf2\x8b%\xbf\xd8?\xbfX\xf2\x8b%\xbf\xd8?\xe5\x17K~\xb1\xe4\xd7?\x11\x11\x11\x11\x11\x11\xc1?0\x96\xfcb\xc9/\xc6?\x03\x9d6\xd0i\x03\xcd?\x11\x11\x11\x11\x11\x11\xd1?\n\xd7\xa3p=\n\xd7?\x9a\x99\x99\x99\x99\x99\xd9?\xde\xdd\xdd\xdd\xdd\xdd\xdd?\x93_,\xf9\xc5\x92\xdf?\x11\x11\x11\x11\x11\x11\xe1?\xa0\xd3\x06:m\xa0\xe3?\xa0\xd3\x06:m\xa0\xe3?UUUUUU\xe5?\x9d6\xd0i\x03\x9d\xe6?wwwwww\xe7?wwwwww\xe7?R\xb8\x1e\x85\xebQ\xe8?R\xb8\x1e\x85\xebQ\xe8?R\xb8\x1e\x85\xebQ\xe8?\xbfX\xf2\x8b%\xbf\xe8?,\xf9\xc5\x92_,\xe9?\xbfX\xf2\x8b%\xbf\xe8?\xbfX\xf2\x8b%\xbf\xe8?\xbfX\xf2\x8b%\xbf\xe8?R\xb8\x1e\x85\xebQ\xe8?R\xb8\x1e\x85\xebQ\xe8?R\xb8\x1e\x85\xebQ\xe8?R\xb8\x1e\x85\xebQ\xe8?\x11\x11\x11\x11\x11\x11\xc1?\xb8\x1e\x85\xebQ\xb8\xce?\xa0\xd3\x06:m\xa0\xd3?\xbfX\xf2\x8b%\xbf\xd8?\xa4p=\n\xd7\xa3\xe0?\xe8\xb4\x81N\x1b\xe8\xe4?\n\xd7\xa3p=\n\xe7?\xe1z\x14\xaeG\xe1\xea?\x03\x9d6\xd0i\x03\xed?q=\n\xd7\xa3p\xed?\xde\xdd\xdd\xdd\xdd\xdd\xed?K~\xb1\xe4\x17K\xee?K~\xb1\xe4\x17K\xee?K~\xb1\xe4\x17K\xee?\xb8\x1e\x85\xebQ\xb8\xee?&\xbfX\xf2\x8b%\xef?&\xbfX\xf2\x8b%\xef?&\xbfX\xf2\x8b%\xef?&\xbfX\xf2\x8b%\xef?&\xbfX\xf2\x8b%\xef?&\xbfX\xf2\x8b%\xef?&\xbfX\xf2\x8b%\xef?&\xbfX\xf2\x8b%\xef?&\xbfX\xf2\x8b%\xef?&\xbfX\xf2\x8b%\xef?&\xbfX\xf2\x8b%\xef?&\xbfX\xf2\x8b%\xef?\x11\x11\x11\x11\x11\x11\xc1?7\xd0i\x03\x9d6\xd0?UUUUUU\xd5?\xb8\x1e\x85\xebQ\xb8\xde?\xa0\xd3\x06:m\xa0\xe3?R\xb8\x1e\x85\xebQ\xe8?\x07:m\xa0\xd3\x06\xea?)\\\x8f\xc2\xf5(\xec?\x96\xfcb\xc9/\x96\xec?q=\n\xd7\xa3p\xed?\xb8\x1e\x85\xebQ\xb8\xee?\xb8\x1e\x85\xebQ\xb8\xee?\xb8\x1e\x85\xebQ\xb8\xee?\xb8\x1e\x85\xebQ\xb8\xee?\xb8\x1e\x85\xebQ\xb8\xee?\xb8\x1e\x85\xebQ\xb8\xee?\xb8\x1e\x85\xebQ\xb8\xee?&\xbfX\xf2\x8b%\xef?&\xbfX\xf2\x8b%\xef?&\xbfX\xf2\x8b%\xef?&\xbfX\xf2\x8b%\xef?&\xbfX\xf2\x8b%\xef?&\xbfX\xf2\x8b%\xef?&\xbfX\xf2\x8b%\xef?&\xbfX\xf2\x8b%\xef?&\xbfX\xf2\x8b%\xef?&\xbfX\xf2\x8b%\xef?\x11\x11\x11\x11\x11\x11\xc1?7\xd0i\x03\x9d6\xd0?)\\\x8f\xc2\xf5(\xdc?\xa4p=\n\xd7\xa3\xe0?\xc3\xf5(\\\x8f\xc2\xe5?R\xb8\x1e\x85\xebQ\xe8?,\xf9\xc5\x92_,\xe9?)\\\x8f\xc2\xf5(\xec?\x03\x9d6\xd0i\x03\xed?q=\n\xd7\xa3p\xed?K~\xb1\xe4\x17K\xee?K~\xb1\xe4\x17K\xee?K~\xb1\xe4\x17K\xee?K~\xb1\xe4\x17K\xee?\xb8\x1e\x85\xebQ\xb8\xee?\xb8\x1e\x85\xebQ\xb8\xee?\xb8\x1e\x85\xebQ\xb8\xee?\xb8\x1e\x85\xebQ\xb8\xee?\xb8\x1e\x85\xebQ\xb8\xee?&\xbfX\xf2\x8b%\xef?&\xbfX\xf2\x8b%\xef?&\xbfX\xf2\x8b%\xef?&\xbfX\xf2\x8b%\xef?&\xbfX\xf2\x8b%\xef?\x93_,\xf9\xc5\x92\xef?\x93_,\xf9\xc5\x92\xef?\x93_,\xf9\xc5\x92\xef?\x11\x11\x11\x11\x11\x11\xc1?\x03\x9d6\xd0i\x03\xcd?\n\xd7\xa3p=\n\xd7?\x93_,\xf9\xc5\x92\xdf?\xc6\x92_,\xf9\xc5\xe2?UUUUUU\xe5?R\xb8\x1e\x85\xebQ\xe8?,\xf9\xc5\x92_,\xe9?\xe1z\x14\xaeG\xe1\xea?\xbc\xbb\xbb\xbb\xbb\xbb\xeb?\x96\xfcb\xc9/\x96\xec?\xde\xdd\xdd\xdd\xdd\xdd\xed?\xde\xdd\xdd\xdd\xdd\xdd\xed?\xde\xdd\xdd\xdd\xdd\xdd\xed?K~\xb1\xe4\x17K\xee?K~\xb1\xe4\x17K\xee?K~\xb1\xe4\x17K\xee?K~\xb1\xe4\x17K\xee?K~\xb1\xe4\x17K\xee?\xb8\x1e\x85\xebQ\xb8\xee?\xb8\x1e\x85\xebQ\xb8\xee?\xb8\x1e\x85\xebQ\xb8\xee?&\xbfX\xf2\x8b%\xef?&\xbfX\xf2\x8b%\xef?&\xbfX\xf2\x8b%\xef?\x93_,\xf9\xc5\x92\xef?\x93_,\xf9\xc5\x92\xef?0\x96\xfcb\xc9/\xc6?0\x96\xfcb\xc9/\xc6?0\x96\xfcb\xc9/\xc6?\xe5\x17K~\xb1\xe4\xc7?0\x96\xfcb\xc9/\xc6?\xc6\x92_,\xf9\xc5\xc2?\x11\x11\x11\x11\x11\x11\xc1?\xb8\x1e\x85\xebQ\xb8\xbe?\xe5\x17K~\xb1\xe4\xb7?\xe5\x17K~\xb1\xe4\xb7?{\x14\xaeG\xe1z\xb4?\x11\x11\x11\x11\x11\x11\xb1?\x11\x11\x11\x11\x11\x11\xb1?O\x1b\xe8\xb4\x81N\x9b?O\x1b\xe8\xb4\x81N\x9b?O\x1b\xe8\xb4\x81N\x9b?O\x1b\xe8\xb4\x81N\x9b?O\x1b\xe8\xb4\x81N\x9b?O\x1b\xe8\xb4\x81N\x8b?\x00\x00\x00\x00\x00\x00\x00\x00\x00\x00\x00\x00\x00\x00\x00\x00\x00\x00\x00\x00\x00\x00\x00\x00\x00\x00\x00\x00\x00\x00\x00\x00\x00\x00\x00\x00\x00\x00\x00\x00\x00\x00\x00\x00\x00\x00\x00\x00\x00\x00\x00\x00\x00\x00\x00\x00\x00\x00\x00\x00\x00\x00\x00\x000\x96\xfcb\xc9/\xc6?\x9a\x99\x99\x99\x99\x99\xc9?\x9a\x99\x99\x99\x99\x99\xc9?\x9a\x99\x99\x99\x99\x99\xc9?\xc6\x92_,\xf9\xc5\xc2?\xc6\x92_,\xf9\xc5\xc2?\xc6\x92_,\xf9\xc5\xc2?\xb8\x1e\x85\xebQ\xb8\xbe?\xe5\x17K~\xb1\xe4\xb7?\xe5\x17K~\xb1\xe4\xb7?O\x1b\xe8\xb4\x81N\xab?{\x14\xaeG\xe1z\xa4?O\x1b\xe8\xb4\x81N\x9b?O\x1b\xe8\xb4\x81N\x9b?O\x1b\xe8\xb4\x81N\x8b?\x00\x00\x00\x00\x00\x00\x00\x00\x00\x00\x00\x00\x00\x00\x00\x00\x00\x00\x00\x00\x00\x00\x00\x00\x00\x00\x00\x00\x00\x00\x00\x00\x00\x00\x00\x00\x00\x00\x00\x00\x00\x00\x00\x00\x00\x00\x00\x00\x00\x00\x00\x00\x00\x00\x00\x00\x00\x00\x00\x00\x00\x00\x00\x00\x00\x00\x00\x00\x00\x00\x00\x00\x00\x00\x00\x00\x00\x00\x00\x00\x00\x00\x00\x00\x00\x00\x00\x00\x00\x00\x00\x00\x00\x00\x00\x000\x96\xfcb\xc9/\xc6?\xe5\x17K~\xb1\xe4\xc7?\x9a\x99\x99\x99\x99\x99\xc9?O\x1b\xe8\xb4\x81N\xcb?\x03\x9d6\xd0i\x03\xcd?\xb8\x1e\x85\xebQ\xb8\xce?\x03\x9d6\xd0i\x03\xcd?\x9a\x99\x99\x99\x99\x99\xc9?\x9a\x99\x99\x99\x99\x99\xc9?\xe5\x17K~\xb1\xe4\xc7?\xb8\x1e\x85\xebQ\xb8\xbe?\x11\x11\x11\x11\x11\x11\xb1?O\x1b\xe8\xb4\x81N\xab?{\x14\xaeG\xe1z\xa4?\x00\x00\x00\x00\x00\x00\x00\x00\x00\x00\x00\x00\x00\x00\x00\x00\x00\x00\x00\x00\x00\x00\x00\x00\x00\x00\x00\x00\x00\x00\x00\x00\x00\x00\x00\x00\x00\x00\x00\x00\x00\x00\x00\x00\x00\x00\x00\x00\x00\x00\x00\x00\x00\x00\x00\x00\x00\x00\x00\x00\x00\x00\x00\x00\x00\x00\x00\x00\x00\x00\x00\x00\x00\x00\x00\x00\x00\x00\x00\x00\x00\x00\x00\x00\x00\x00\x00\x00\x00\x00\x00\x00\x00\x00\x00\x00\x00\x00\x00\x00\x00\x00\x00\x000\x96\xfcb\xc9/\xc6?\x03\x9d6\xd0i\x03\xcd?\x11\x11\x11\x11\x11\x11\xd1?\x11\x11\x11\x11\x11\x11\xd1?7\xd0i\x03\x9d6\xd0?\x11\x11\x11\x11\x11\x11\xd1?7\xd0i\x03\x9d6\xd0?\xb8\x1e\x85\xebQ\xb8\xce?\x03\x9d6\xd0i\x03\xcd?\x03\x9d6\xd0i\x03\xcd?\x9a\x99\x99\x99\x99\x99\xc9?\x9a\x99\x99\x99\x99\x99\xc9?\xe5\x17K~\xb1\xe4\xc7?0\x96\xfcb\xc9/\xc6?0\x96\xfcb\xc9/\xc6?\xb8\x1e\x85\xebQ\xb8\xbe?O\x1b\xe8\xb4\x81N\xbb?\xe5\x17K~\xb1\xe4\xb7?{\x14\xaeG\xe1z\xa4?O\x1b\xe8\xb4\x81N\x9b?O\x1b\xe8\xb4\x81N\x8b?O\x1b\xe8\xb4\x81N\x8b?O\x1b\xe8\xb4\x81N\x8b?O\x1b\xe8\xb4\x81N\x8b?O\x1b\xe8\xb4\x81N\x8b?O\x1b\xe8\xb4\x81N\x8b?O\x1b\xe8\xb4\x81N\x8b?0\x96\xfcb\xc9/\xc6?\x9a\x99\x99\x99\x99\x99\xc9?7\xd0i\x03\x9d6\xd0?\x11\x11\x11\x11\x11\x11\xd1?7\xd0i\x03\x9d6\xd0?7\xd0i\x03\x9d6\xd0?7\xd0i\x03\x9d6\xd0?7\xd0i\x03\x9d6\xd0?\xb8\x1e\x85\xebQ\xb8\xce?\x9a\x99\x99\x99\x99\x99\xc9?\xe5\x17K~\xb1\xe4\xc7?\xb8\x1e\x85\xebQ\xb8\xbe?\x11\x11\x11\x11\x11\x11\xc1?\x11\x11\x11\x11\x11\x11\xc1?O\x1b\xe8\xb4\x81N\xbb?\xe5\x17K~\xb1\xe4\xb7?{\x14\xaeG\xe1z\xa4?O\x1b\xe8\xb4\x81N\x9b?O\x1b\xe8\xb4\x81N\x8b?O\x1b\xe8\xb4\x81N\x8b?O\x1b\xe8\xb4\x81N\x8b?O\x1b\xe8\xb4\x81N\x8b?\x00\x00\x00\x00\x00\x00\x00\x00\x00\x00\x00\x00\x00\x00\x00\x00\x00\x00\x00\x00\x00\x00\x00\x00\x00\x00\x00\x00\x00\x00\x00\x00\x00\x00\x00\x00\x00\x00\x00\x000\x96\xfcb\xc9/\xc6?\xb8\x1e\x85\xebQ\xb8\xce?\x11\x11\x11\x11\x11\x11\xd1?7\xd0i\x03\x9d6\xd0?7\xd0i\x03\x9d6\xd0?7\xd0i\x03\x9d6\xd0?7\xd0i\x03\x9d6\xd0?\xb8\x1e\x85\xebQ\xb8\xce?\x03\x9d6\xd0i\x03\xcd?O\x1b\xe8\xb4\x81N\xcb?\xe5\x17K~\xb1\xe4\xc7?\xe5\x17K~\xb1\xe4\xc7?\xc6\x92_,\xf9\xc5\xc2?\x11\x11\x11\x11\x11\x11\xc1?O\x1b\xe8\xb4\x81N\xbb?O\x1b\xe8\xb4\x81N\xbb?O\x1b\xe8\xb4\x81N\xbb?\x11\x11\x11\x11\x11\x11\xb1?O\x1b\xe8\xb4\x81N\xab?O\x1b\xe8\xb4\x81N\xab?{\x14\xaeG\xe1z\xa4?O\x1b\xe8\xb4\x81N\x8b?\x00\x00\x00\x00\x00\x00\x00\x00\x00\x00\x00\x00\x00\x00\x00\x00\x00\x00\x00\x00\x00\x00\x00\x00\x00\x00\x00\x00\x00\x00\x00\x00\x00\x00\x00\x00\x00\x00\x00\x000\x96\xfcb\xc9/\xc6?\xc6\x92_,\xf9\xc5\xd2?\xc6\x92_,\xf9\xc5\xd2?\xa0\xd3\x06:m\xa0\xd3?{\x14\xaeG\xe1z\xd4?UUUUUU\xd5?t\xda@\xa7\rt\xda?)\\\x8f\xc2\xf5(\xdc?\xde\xdd\xdd\xdd\xdd\xdd\xdd?\xa4p=\n\xd7\xa3\xe0?\xecQ\xb8\x1e\x85\xeb\xe1?Y\xf2\x8b%\xbfX\xe2?Y\xf2\x8b%\xbfX\xe2?\xecQ\xb8\x1e\x85\xeb\xe1?~\xb1\xe4\x17K~\xe1?\xa4p=\n\xd7\xa3\xe0?\xa4p=\n\xd7\xa3\xe0?7\xd0i\x03\x9d6\xe0?\x03\x9d6\xd0i\x03\xdd?t\xda@\xa7\rt\xda?\xbfX\xf2\x8b%\xbf\xd8?UUUUUU\xd5?\xa0\xd3\x06:m\xa0\xd3?\xecQ\xb8\x1e\x85\xeb\xd1?7\xd0i\x03\x9d6\xd0?\x03\x9d6\xd0i\x03\xcd?\x9a\x99\x99\x99\x99\x99\xc9?0\x96\xfcb\xc9/\xc6?\xecQ\xb8\x1e\x85\xeb\xd1?\xa0\xd3\x06:m\xa0\xd3?\xa0\xd3\x06:m\xa0\xd3?\n\xd7\xa3p=\n\xd7?\xe5\x17K~\xb1\xe4\xd7?O\x1b\xe8\xb4\x81N\xdb?\x93_,\xf9\xc5\x92\xdf?\xa4p=\n\xd7\xa3\xe0?\x0et\xda@\xa7\r\xe4?\xc3\xf5(\\\x8f\xc2\xe5?wwwwww\xe7?\xe5\x17K~\xb1\xe4\xe7?\x9a\x99\x99\x99\x99\x99\xe9?\x07:m\xa0\xd3\x06\xea?\x07:m\xa0\xd3\x06\xea?t\xda@\xa7\rt\xea?t\xda@\xa7\rt\xea?\xe1z\x14\xaeG\xe1\xea?O\x1b\xe8\xb4\x81N\xeb?O\x1b\xe8\xb4\x81N\xeb?O\x1b\xe8\xb4\x81N\xeb?O\x1b\xe8\xb4\x81N\xeb?O\x1b\xe8\xb4\x81N\xeb?O\x1b\xe8\xb4\x81N\xeb?O\x1b\xe8\xb4\x81N\xeb?O\x1b\xe8\xb4\x81N\xeb?0\x96\xfcb\xc9/\xc6?\xc6\x92_,\xf9\xc5\xd2?\xa0\xd3\x06:m\xa0\xd3?0\x96\xfcb\xc9/\xd6?\xde\xdd\xdd\xdd\xdd\xdd\xdd?\xecQ\xb8\x1e\x85\xeb\xe1?\xa0\xd3\x06:m\xa0\xe3?\n\xd7\xa3p=\n\xe7?,\xf9\xc5\x92_,\xe9?\x9a\x99\x99\x99\x99\x99\xe9?\x07:m\xa0\xd3\x06\xea?t\xda@\xa7\rt\xea?t\xda@\xa7\rt\xea?\x03\x9d6\xd0i\x03\xed?q=\n\xd7\xa3p\xed?K~\xb1\xe4\x17K\xee?K~\xb1\xe4\x17K\xee?K~\xb1\xe4\x17K\xee?K~\xb1\xe4\x17K\xee?K~\xb1\xe4\x17K\xee?\x93_,\xf9\xc5\x92\xef?\x00\x00\x00\x00\x00\x00\xf0?\x00\x00\x00\x00\x00\x00\xf0?\x00\x00\x00\x00\x00\x00\xf0?\x00\x00\x00\x00\x00\x00\xf0?\x00\x00\x00\x00\x00\x00\xf0?\x00\x00\x00\x00\x00\x00\xf0?0\x96\xfcb\xc9/\xc6?\xc6\x92_,\xf9\xc5\xd2?UUUUUU\xd5?\x93_,\xf9\xc5\x92\xdf?333333\xe3?wwwwww\xe7?\xbfX\xf2\x8b%\xbf\xe8?O\x1b\xe8\xb4\x81N\xeb?q=\n\xd7\xa3p\xed?\xde\xdd\xdd\xdd\xdd\xdd\xed?K~\xb1\xe4\x17K\xee?K~\xb1\xe4\x17K\xee?\x93_,\xf9\xc5\x92\xef?\x93_,\xf9\xc5\x92\xef?\x93_,\xf9\xc5\x92\xef?\x93_,\xf9\xc5\x92\xef?\x00\x00\x00\x00\x00\x00\xf0?\x00\x00\x00\x00\x00\x00\xf0?\x00\x00\x00\x00\x00\x00\xf0?\x00\x00\x00\x00\x00\x00\xf0?\x00\x00\x00\x00\x00\x00\xf0?\x00\x00\x00\x00\x00\x00\xf0?\x00\x00\x00\x00\x00\x00\xf0?\x00\x00\x00\x00\x00\x00\xf0?\x00\x00\x00\x00\x00\x00\xf0?\x00\x00\x00\x00\x00\x00\xf0?\x00\x00\x00\x00\x00\x00\xf0?0\x96\xfcb\xc9/\xc6?\xc6\x92_,\xf9\xc5\xd2?UUUUUU\xd5?)\\\x8f\xc2\xf5(\xdc?\x93_,\xf9\xc5\x92\xdf?333333\xe3?\xc3\xf5(\\\x8f\xc2\xe5?R\xb8\x1e\x85\xebQ\xe8?t\xda@\xa7\rt\xea?t\xda@\xa7\rt\xea?O\x1b\xe8\xb4\x81N\xeb?q=\n\xd7\xa3p\xed?K~\xb1\xe4\x17K\xee?K~\xb1\xe4\x17K\xee?\xb8\x1e\x85\xebQ\xb8\xee?\x93_,\xf9\xc5\x92\xef?\x93_,\xf9\xc5\x92\xef?\x93_,\xf9\xc5\x92\xef?\x93_,\xf9\xc5\x92\xef?\x93_,\xf9\xc5\x92\xef?\x93_,\xf9\xc5\x92\xef?\x93_,\xf9\xc5\x92\xef?\x93_,\xf9\xc5\x92\xef?\x93_,\xf9\xc5\x92\xef?\x93_,\xf9\xc5\x92\xef?\x93_,\xf9\xc5\x92\xef?\x00\x00\x00\x00\x00\x00\xf0?0\x96\xfcb\xc9/\xc6?\xa0\xd3\x06:m\xa0\xd3?t\xda@\xa7\rt\xda?\x11\x11\x11\x11\x11\x11\xe1?{\x14\xaeG\xe1z\xe4?\xbfX\xf2\x8b%\xbf\xe8?t\xda@\xa7\rt\xea?O\x1b\xe8\xb4\x81N\xeb?\xbc\xbb\xbb\xbb\xbb\xbb\xeb?q=\n\xd7\xa3p\xed?K~\xb1\xe4\x17K\xee?&\xbfX\xf2\x8b%\xef?\x00\x00\x00\x00\x00\x00\xf0?\x00\x00\x00\x00\x00\x00\xf0?\x00\x00\x00\x00\x00\x00\xf0?\x00\x00\x00\x00\x00\x00\xf0?\x00\x00\x00\x00\x00\x00\xf0?\x00\x00\x00\x00\x00\x00\xf0?\x00\x00\x00\x00\x00\x00\xf0?\x00\x00\x00\x00\x00\x00\xf0?\x00\x00\x00\x00\x00\x00\xf0?\x00\x00\x00\x00\x00\x00\xf0?\x00\x00\x00\x00\x00\x00\xf0?\x00\x00\x00\x00\x00\x00\xf0?\x00\x00\x00\x00\x00\x00\xf0?\x00\x00\x00\x00\x00\x00\xf0?\x00\x00\x00\x00\x00\x00\xf0?0\x96\xfcb\xc9/\xc6?\xa0\xd3\x06:m\xa0\xd3?\xe5\x17K~\xb1\xe4\xd7?)\\\x8f\xc2\xf5(\xdc?\xecQ\xb8\x1e\x85\xeb\xe1?UUUUUU\xe5?\xbfX\xf2\x8b%\xbf\xe8?\x07:m\xa0\xd3\x06\xea?t\xda@\xa7\rt\xea?t\xda@\xa7\rt\xea?)\\\x8f\xc2\xf5(\xec?\x03\x9d6\xd0i\x03\xed?\x03\x9d6\xd0i\x03\xed?\xde\xdd\xdd\xdd\xdd\xdd\xed?\xb8\x1e\x85\xebQ\xb8\xee?\x93_,\xf9\xc5\x92\xef?\x93_,\xf9\xc5\x92\xef?\x93_,\xf9\xc5\x92\xef?\x93_,\xf9\xc5\x92\xef?\x93_,\xf9\xc5\x92\xef?\x93_,\xf9\xc5\x92\xef?\x93_,\xf9\xc5\x92\xef?\x00\x00\x00\x00\x00\x00\xf0?\x00\x00\x00\x00\x00\x00\xf0?\x00\x00\x00\x00\x00\x00\xf0?\x00\x00\x00\x00\x00\x00\xf0?\x00\x00\x00\x00\x00\x00\xf0?O\x1b\xe8\xb4\x81N\xab?\x11\x11\x11\x11\x11\x11\xb1?\x11\x11\x11\x11\x11\x11\xb1?\x11\x11\x11\x11\x11\x11\xb1?\x11\x11\x11\x11\x11\x11\xb1?O\x1b\xe8\xb4\x81N\xab?{\x14\xaeG\xe1z\xa4?O\x1b\xe8\xb4\x81N\x9b?O\x1b\xe8\xb4\x81N\x9b?O\x1b\xe8\xb4\x81N\x8b?\x00\x00\x00\x00\x00\x00\x00\x00\x00\x00\x00\x00\x00\x00\x00\x00\x00\x00\x00\x00\x00\x00\x00\x00\x00\x00\x00\x00\x00\x00\x00\x00\x00\x00\x00\x00\x00\x00\x00\x00\x00\x00\x00\x00\x00\x00\x00\x00\x00\x00\x00\x00\x00\x00\x00\x00\x00\x00\x00\x00\x00\x00\x00\x00\x00\x00\x00\x00\x00\x00\x00\x00\x00\x00\x00\x00\x00\x00\x00\x00\x00\x00\x00\x00\x00\x00\x00\x00\x00\x00\x00\x00\x00\x00\x00\x00\x00\x00\x00\x00\x00\x00\x00\x00\x00\x00\x00\x00\x00\x00\x00\x00\x00\x00\x00\x00\x00\x00\x00\x00\x00\x00\x00\x00\x00\x00\x00\x00\x00\x00\x00\x00\x00\x00\x00\x00O\x1b\xe8\xb4\x81N\xab?\x11\x11\x11\x11\x11\x11\xb1?\x11\x11\x11\x11\x11\x11\xb1?\x11\x11\x11\x11\x11\x11\xb1?O\x1b\xe8\xb4\x81N\xab?O\x1b\xe8\xb4\x81N\xab?O\x1b\xe8\xb4\x81N\xab?O\x1b\xe8\xb4\x81N\x9b?\x00\x00\x00\x00\x00\x00\x00\x00\x00\x00\x00\x00\x00\x00\x00\x00\x00\x00\x00\x00\x00\x00\x00\x00\x00\x00\x00\x00\x00\x00\x00\x00\x00\x00\x00\x00\x00\x00\x00\x00\x00\x00\x00\x00\x00\x00\x00\x00\x00\x00\x00\x00\x00\x00\x00\x00\x00\x00\x00\x00\x00\x00\x00\x00\x00\x00\x00\x00\x00\x00\x00\x00\x00\x00\x00\x00\x00\x00\x00\x00\x00\x00\x00\x00\x00\x00\x00\x00\x00\x00\x00\x00\x00\x00\x00\x00\x00\x00\x00\x00\x00\x00\x00\x00\x00\x00\x00\x00\x00\x00\x00\x00\x00\x00\x00\x00\x00\x00\x00\x00\x00\x00\x00\x00\x00\x00\x00\x00\x00\x00\x00\x00\x00\x00\x00\x00\x00\x00\x00\x00\x00\x00\x00\x00\x00\x00\x00\x00\x00\x00\x00\x00O\x1b\xe8\xb4\x81N\xab?\x11\x11\x11\x11\x11\x11\xb1?\x11\x11\x11\x11\x11\x11\xb1?\x11\x11\x11\x11\x11\x11\xb1?\x11\x11\x11\x11\x11\x11\xb1?\x11\x11\x11\x11\x11\x11\xb1?\x11\x11\x11\x11\x11\x11\xb1?O\x1b\xe8\xb4\x81N\xab?O\x1b\xe8\xb4\x81N\x8b?\x00\x00\x00\x00\x00\x00\x00\x00\x00\x00\x00\x00\x00\x00\x00\x00\x00\x00\x00\x00\x00\x00\x00\x00\x00\x00\x00\x00\x00\x00\x00\x00\x00\x00\x00\x00\x00\x00\x00\x00\x00\x00\x00\x00\x00\x00\x00\x00\x00\x00\x00\x00\x00\x00\x00\x00\x00\x00\x00\x00\x00\x00\x00\x00\x00\x00\x00\x00\x00\x00\x00\x00\x00\x00\x00\x00\x00\x00\x00\x00\x00\x00\x00\x00\x00\x00\x00\x00\x00\x00\x00\x00\x00\x00\x00\x00\x00\x00\x00\x00\x00\x00\x00\x00\x00\x00\x00\x00\x00\x00\x00\x00\x00\x00\x00\x00\x00\x00\x00\x00\x00\x00\x00\x00\x00\x00\x00\x00\x00\x00\x00\x00\x00\x00\x00\x00\x00\x00\x00\x00\x00\x00\x00\x00O\x1b\xe8\xb4\x81N\xab?\x11\x11\x11\x11\x11\x11\xb1?\x11\x11\x11\x11\x11\x11\xb1?\x11\x11\x11\x11\x11\x11\xb1?{\x14\xaeG\xe1z\xb4?\x11\x11\x11\x11\x11\x11\xb1?O\x1b\xe8\xb4\x81N\xbb?\x11\x11\x11\x11\x11\x11\xb1?{\x14\xaeG\xe1z\xb4?O\x1b\xe8\xb4\x81N\x9b?O\x1b\xe8\xb4\x81N\x8b?\x00\x00\x00\x00\x00\x00\x00\x00\x00\x00\x00\x00\x00\x00\x00\x00\x00\x00\x00\x00\x00\x00\x00\x00\x00\x00\x00\x00\x00\x00\x00\x00\x00\x00\x00\x00\x00\x00\x00\x00\x00\x00\x00\x00\x00\x00\x00\x00\x00\x00\x00\x00\x00\x00\x00\x00\x00\x00\x00\x00\x00\x00\x00\x00\x00\x00\x00\x00\x00\x00\x00\x00\x00\x00\x00\x00\x00\x00\x00\x00\x00\x00\x00\x00\x00\x00\x00\x00\x00\x00\x00\x00\x00\x00\x00\x00\x00\x00\x00\x00\x00\x00\x00\x00\x00\x00\x00\x00\x00\x00\x00\x00\x00\x00\x00\x00\x00\x00\x00\x00\x00\x00\x00\x00\x00\x00\x00\x00O\x1b\xe8\xb4\x81N\xab?{\x14\xaeG\xe1z\xb4?{\x14\xaeG\xe1z\xb4?{\x14\xaeG\xe1z\xb4?{\x14\xaeG\xe1z\xb4?{\x14\xaeG\xe1z\xb4?O\x1b\xe8\xb4\x81N\xab?{\x14\xaeG\xe1z\xa4?O\x1b\xe8\xb4\x81N\x8b?O\x1b\xe8\xb4\x81N\x8b?O\x1b\xe8\xb4\x81N\x8b?O\x1b\xe8\xb4\x81N\x8b?O\x1b\xe8\xb4\x81N\x8b?O\x1b\xe8\xb4\x81N\x8b?\x00\x00\x00\x00\x00\x00\x00\x00\x00\x00\x00\x00\x00\x00\x00\x00\x00\x00\x00\x00\x00\x00\x00\x00\x00\x00\x00\x00\x00\x00\x00\x00\x00\x00\x00\x00\x00\x00\x00\x00\x00\x00\x00\x00\x00\x00\x00\x00\x00\x00\x00\x00\x00\x00\x00\x00\x00\x00\x00\x00\x00\x00\x00\x00\x00\x00\x00\x00\x00\x00\x00\x00\x00\x00\x00\x00\x00\x00\x00\x00\x00\x00\x00\x00\x00\x00\x00\x00\x00\x00\x00\x00\x00\x00\x00\x00\x00\x00\x00\x00\x00\x00\x00\x00O\x1b\xe8\xb4\x81N\xab?{\x14\xaeG\xe1z\xb4?{\x14\xaeG\xe1z\xb4?\xe5\x17K~\xb1\xe4\xb7?O\x1b\xe8\xb4\x81N\xbb?\xe5\x17K~\xb1\xe4\xb7?{\x14\xaeG\xe1z\xc4?\xe5\x17K~\xb1\xe4\xc7?\x9a\x99\x99\x99\x99\x99\xc9?O\x1b\xe8\xb4\x81N\xcb?\x11\x11\x11\x11\x11\x11\xc1?\xe5\x17K~\xb1\xe4\xb7?\x11\x11\x11\x11\x11\x11\xb1?O\x1b\xe8\xb4\x81N\xab?\x11\x11\x11\x11\x11\x11\xb1?\x11\x11\x11\x11\x11\x11\xb1?O\x1b\xe8\xb4\x81N\xab?O\x1b\xe8\xb4\x81N\xab?{\x14\xaeG\xe1z\xa4?{\x14\xaeG\xe1z\xa4?{\x14\xaeG\xe1z\xa4?O\x1b\xe8\xb4\x81N\x9b?O\x1b\xe8\xb4\x81N\x8b?O\x1b\xe8\xb4\x81N\x8b?O\x1b\xe8\xb4\x81N\x8b?\x00\x00\x00\x00\x00\x00\x00\x00\x00\x00\x00\x00\x00\x00\x00\x00O\x1b\xe8\xb4\x81N\xab?{\x14\xaeG\xe1z\xb4?\xe5\x17K~\xb1\xe4\xb7?\xe5\x17K~\xb1\xe4\xb7?O\x1b\xe8\xb4\x81N\xcb?\xb8\x1e\x85\xebQ\xb8\xce?\xa0\xd3\x06:m\xa0\xd3?\xde\xdd\xdd\xdd\xdd\xdd\xdd?Y\xf2\x8b%\xbfX\xe2?{\x14\xaeG\xe1z\xe4?wwwwww\xe7?R\xb8\x1e\x85\xebQ\xe8?\xe5\x17K~\xb1\xe4\xe7?{\x14\xaeG\xe1z\xe4?~\xb1\xe4\x17K~\xe1?O\x1b\xe8\xb4\x81N\xdb?\n\xd7\xa3p=\n\xd7?\x11\x11\x11\x11\x11\x11\xd1?O\x1b\xe8\xb4\x81N\xcb?\xb8\x1e\x85\xebQ\xb8\xbe?\x11\x11\x11\x11\x11\x11\xb1?\x11\x11\x11\x11\x11\x11\xb1?O\x1b\xe8\xb4\x81N\xab?{\x14\xaeG\xe1z\xa4?{\x14\xaeG\xe1z\xa4?O\x1b\xe8\xb4\x81N\x8b?O\x1b\xe8\xb4\x81N\x8b?O\x1b\xe8\xb4\x81N\xab?{\x14\xaeG\xe1z\xb4?{\x14\xaeG\xe1z\xb4?\xe5\x17K~\xb1\xe4\xb7?\x11\x11\x11\x11\x11\x11\xc1?{\x14\xaeG\xe1z\xc4?\x03\x9d6\xd0i\x03\xcd?\xb8\x1e\x85\xebQ\xb8\xce?\xecQ\xb8\x1e\x85\xeb\xd1?{\x14\xaeG\xe1z\xd4?t\xda@\xa7\rt\xda?O\x1b\xe8\xb4\x81N\xdb?\x03\x9d6\xd0i\x03\xdd?\xde\xdd\xdd\xdd\xdd\xdd\xdd?\x93_,\xf9\xc5\x92\xdf?\xb8\x1e\x85\xebQ\xb8\xde?\x93_,\xf9\xc5\x92\xdf?7\xd0i\x03\x9d6\xe0?\xa4p=\n\xd7\xa3\xe0?\x11\x11\x11\x11\x11\x11\xe1?\x11\x11\x11\x11\x11\x11\xe1?~\xb1\xe4\x17K~\xe1?~\xb1\xe4\x17K~\xe1?~\xb1\xe4\x17K~\xe1?\xc6\x92_,\xf9\xc5\xe2?333333\xe3?\xa0\xd3\x06:m\xa0\xe3?O\x1b\xe8\xb4\x81N\xab?{\x14\xaeG\xe1z\xb4?\xe5\x17K~\xb1\xe4\xb7?\xc6\x92_,\xf9\xc5\xc2?0\x96\xfcb\xc9/\xc6?7\xd0i\x03\x9d6\xd0?\xc6\x92_,\xf9\xc5\xd2?\n\xd7\xa3p=\n\xd7?\xb8\x1e\x85\xebQ\xb8\xde?Y\xf2\x8b%\xbfX\xe2?UUUUUU\xe5?\xe5\x17K~\xb1\xe4\xe7?\x9a\x99\x99\x99\x99\x99\xe9?\xe1z\x14\xaeG\xe1\xea?\xbc\xbb\xbb\xbb\xbb\xbb\xeb?\x96\xfcb\xc9/\x96\xec?\x96\xfcb\xc9/\x96\xec?q=\n\xd7\xa3p\xed?\xde\xdd\xdd\xdd\xdd\xdd\xed?\xde\xdd\xdd\xdd\xdd\xdd\xed?\xde\xdd\xdd\xdd\xdd\xdd\xed?K~\xb1\xe4\x17K\xee?K~\xb1\xe4\x17K\xee?K~\xb1\xe4\x17K\xee?K~\xb1\xe4\x17K\xee?K~\xb1\xe4\x17K\xee?K~\xb1\xe4\x17K\xee?O\x1b\xe8\xb4\x81N\xab?{\x14\xaeG\xe1z\xb4?\x11\x11\x11\x11\x11\x11\xc1?{\x14\xaeG\xe1z\xc4?\xb8\x1e\x85\xebQ\xb8\xce?\xc6\x92_,\xf9\xc5\xd2?t\xda@\xa7\rt\xda?\x93_,\xf9\xc5\x92\xdf?\x0et\xda@\xa7\r\xe4?\x9d6\xd0i\x03\x9d\xe6?\x07:m\xa0\xd3\x06\xea?\x03\x9d6\xd0i\x03\xed?K~\xb1\xe4\x17K\xee?\xb8\x1e\x85\xebQ\xb8\xee?&\xbfX\xf2\x8b%\xef?&\xbfX\xf2\x8b%\xef?&\xbfX\xf2\x8b%\xef?&\xbfX\xf2\x8b%\xef?&\xbfX\xf2\x8b%\xef?\x93_,\xf9\xc5\x92\xef?\x93_,\xf9\xc5\x92\xef?\x93_,\xf9\xc5\x92\xef?\x93_,\xf9\xc5\x92\xef?\x93_,\xf9\xc5\x92\xef?\x93_,\xf9\xc5\x92\xef?\x93_,\xf9\xc5\x92\xef?\x93_,\xf9\xc5\x92\xef?O\x1b\xe8\xb4\x81N\xab?{\x14\xaeG\xe1z\xb4?\x11\x11\x11\x11\x11\x11\xc1?{\x14\xaeG\xe1z\xc4?\x03\x9d6\xd0i\x03\xcd?0\x96\xfcb\xc9/\xd6?t\xda@\xa7\rt\xda?\x93_,\xf9\xc5\x92\xdf?\xe8\xb4\x81N\x1b\xe8\xe4?wwwwww\xe7?\xbfX\xf2\x8b%\xbf\xe8?O\x1b\xe8\xb4\x81N\xeb?)\\\x8f\xc2\xf5(\xec?q=\n\xd7\xa3p\xed?\xde\xdd\xdd\xdd\xdd\xdd\xed?K~\xb1\xe4\x17K\xee?&\xbfX\xf2\x8b%\xef?&\xbfX\xf2\x8b%\xef?\x93_,\xf9\xc5\x92\xef?\x93_,\xf9\xc5\x92\xef?\x00\x00\x00\x00\x00\x00\xf0?\x00\x00\x00\x00\x00\x00\xf0?\x00\x00\x00\x00\x00\x00\xf0?\x00\x00\x00\x00\x00\x00\xf0?\x00\x00\x00\x00\x00\x00\xf0?\x00\x00\x00\x00\x00\x00\xf0?\x00\x00\x00\x00\x00\x00\xf0?O\x1b\xe8\xb4\x81N\xab?\xe5\x17K~\xb1\xe4\xb7?{\x14\xaeG\xe1z\xc4?7\xd0i\x03\x9d6\xd0?\n\xd7\xa3p=\n\xd7?\x93_,\xf9\xc5\x92\xdf?333333\xe3?\x9d6\xd0i\x03\x9d\xe6?,\xf9\xc5\x92_,\xe9?\xe1z\x14\xaeG\xe1\xea?O\x1b\xe8\xb4\x81N\xeb?q=\n\xd7\xa3p\xed?\xde\xdd\xdd\xdd\xdd\xdd\xed?\x93_,\xf9\xc5\x92\xef?\x93_,\xf9\xc5\x92\xef?\x93_,\xf9\xc5\x92\xef?\x93_,\xf9\xc5\x92\xef?\x00\x00\x00\x00\x00\x00\xf0?\x00\x00\x00\x00\x00\x00\xf0?\x00\x00\x00\x00\x00\x00\xf0?\x00\x00\x00\x00\x00\x00\xf0?\x00\x00\x00\x00\x00\x00\xf0?\x00\x00\x00\x00\x00\x00\xf0?\x00\x00\x00\x00\x00\x00\xf0?\x00\x00\x00\x00\x00\x00\xf0?\x00\x00\x00\x00\x00\x00\xf0?\x00\x00\x00\x00\x00\x00\xf0?O\x1b\xe8\xb4\x81N\xab?O\x1b\xe8\xb4\x81N\xbb?0\x96\xfcb\xc9/\xc6?O\x1b\xe8\xb4\x81N\xcb?\xe5\x17K~\xb1\xe4\xd7?)\\\x8f\xc2\xf5(\xdc?\x93_,\xf9\xc5\x92\xdf?\xc6\x92_,\xf9\xc5\xe2?0\x96\xfcb\xc9/\xe6?wwwwww\xe7?\xe5\x17K~\xb1\xe4\xe7?\x07:m\xa0\xd3\x06\xea?\xe1z\x14\xaeG\xe1\xea?\xbc\xbb\xbb\xbb\xbb\xbb\xeb?)\\\x8f\xc2\xf5(\xec?\x03\x9d6\xd0i\x03\xed?K~\xb1\xe4\x17K\xee?\xb8\x1e\x85\xebQ\xb8\xee?\xb8\x1e\x85\xebQ\xb8\xee?&\xbfX\xf2\x8b%\xef?&\xbfX\xf2\x8b%\xef?&\xbfX\xf2\x8b%\xef?\x93_,\xf9\xc5\x92\xef?\x00\x00\x00\x00\x00\x00\xf0?\x00\x00\x00\x00\x00\x00\xf0?\x00\x00\x00\x00\x00\x00\xf0?\x00\x00\x00\x00\x00\x00\xf0?)\\\x8f\xc2\xf5(\xec?)\\\x8f\xc2\xf5(\xec?)\\\x8f\xc2\xf5(\xec?)\\\x8f\xc2\xf5(\xec?)\\\x8f\xc2\xf5(\xec?)\\\x8f\xc2\xf5(\xec?\xb8\x1e\x85\xebQ\xb8\xee?\xb8\x1e\x85\xebQ\xb8\xee?)\\\x8f\xc2\xf5(\xec?)\\\x8f\xc2\xf5(\xec?)\\\x8f\xc2\xf5(\xec?)\\\x8f\xc2\xf5(\xec?)\\\x8f\xc2\xf5(\xec?)\\\x8f\xc2\xf5(\xec?)\\\x8f\xc2\xf5(\xec?)\\\x8f\xc2\xf5(\xec?\x96\xfcb\xc9/\x96\xec?\x96\xfcb\xc9/\x96\xec?\x96\xfcb\xc9/\x96\xec?\x96\xfcb\xc9/\x96\xec?\x96\xfcb\xc9/\x96\xec?\x96\xfcb\xc9/\x96\xec?\x96\xfcb\xc9/\x96\xec?\x96\xfcb\xc9/\x96\xec?)\\\x8f\xc2\xf5(\xec?)\\\x8f\xc2\xf5(\xec?)\\\x8f\xc2\xf5(\xec?)\\\x8f\xc2\xf5(\xec?)\\\x8f\xc2\xf5(\xec?)\\\x8f\xc2\xf5(\xec?)\\\x8f\xc2\xf5(\xec?\xb8\x1e\x85\xebQ\xb8\xee?\xb8\x1e\x85\xebQ\xb8\xee?\xb8\x1e\x85\xebQ\xb8\xee?\xb8\x1e\x85\xebQ\xb8\xee?\xb8\x1e\x85\xebQ\xb8\xee?K~\xb1\xe4\x17K\xee?K~\xb1\xe4\x17K\xee?K~\xb1\xe4\x17K\xee?K~\xb1\xe4\x17K\xee?\xde\xdd\xdd\xdd\xdd\xdd\xed?\x96\xfcb\xc9/\x96\xec?\xbc\xbb\xbb\xbb\xbb\xbb\xeb?\xe1z\x14\xaeG\xe1\xea?t\xda@\xa7\rt\xea?\x07:m\xa0\xd3\x06\xea?\x07:m\xa0\xd3\x06\xea?\x07:m\xa0\xd3\x06\xea?\x9a\x99\x99\x99\x99\x99\xe9?,\xf9\xc5\x92_,\xe9?,\xf9\xc5\x92_,\xe9?,\xf9\xc5\x92_,\xe9?\x9a\x99\x99\x99\x99\x99\xe9?\x07:m\xa0\xd3\x06\xea?)\\\x8f\xc2\xf5(\xec?)\\\x8f\xc2\xf5(\xec?)\\\x8f\xc2\xf5(\xec?)\\\x8f\xc2\xf5(\xec?)\\\x8f\xc2\xf5(\xec?)\\\x8f\xc2\xf5(\xec?)\\\x8f\xc2\xf5(\xec?\x96\xfcb\xc9/\x96\xec?\x96\xfcb\xc9/\x96\xec?\x96\xfcb\xc9/\x96\xec?\x96\xfcb\xc9/\x96\xec?\x96\xfcb\xc9/\x96\xec?\x96\xfcb\xc9/\x96\xec?)\\\x8f\xc2\xf5(\xec?\x96\xfcb\xc9/\x96\xec?\x96\xfcb\xc9/\x96\xec?\x96\xfcb\xc9/\x96\xec?\x96\xfcb\xc9/\x96\xec?\x96\xfcb\xc9/\x96\xec?\x96\xfcb\xc9/\x96\xec?\x96\xfcb\xc9/\x96\xec?\x96\xfcb\xc9/\x96\xec?\x96\xfcb\xc9/\x96\xec?\x96\xfcb\xc9/\x96\xec?\x96\xfcb\xc9/\x96\xec?\x03\x9d6\xd0i\x03\xed?\x03\x9d6\xd0i\x03\xed?)\\\x8f\xc2\xf5(\xec?)\\\x8f\xc2\xf5(\xec?)\\\x8f\xc2\xf5(\xec?)\\\x8f\xc2\xf5(\xec?)\\\x8f\xc2\xf5(\xec?\xbc\xbb\xbb\xbb\xbb\xbb\xeb?O\x1b\xe8\xb4\x81N\xeb?\xe1z\x14\xaeG\xe1\xea?\xe1z\x14\xaeG\xe1\xea?\xe1z\x14\xaeG\xe1\xea?\xe1z\x14\xaeG\xe1\xea?\xe1z\x14\xaeG\xe1\xea?\xe1z\x14\xaeG\xe1\xea?t\xda@\xa7\rt\xea?\x9a\x99\x99\x99\x99\x99\xe9?,\xf9\xc5\x92_,\xe9?\xbfX\xf2\x8b%\xbf\xe8?\xbfX\xf2\x8b%\xbf\xe8?R\xb8\x1e\x85\xebQ\xe8?\xe5\x17K~\xb1\xe4\xe7?\n\xd7\xa3p=\n\xe7?0\x96\xfcb\xc9/\xe6?\xc3\xf5(\\\x8f\xc2\xe5?\xc3\xf5(\\\x8f\xc2\xe5?UUUUUU\xe5?\xe8\xb4\x81N\x1b\xe8\xe4?UUUUUU\xe5?)\\\x8f\xc2\xf5(\xec?)\\\x8f\xc2\xf5(\xec?)\\\x8f\xc2\xf5(\xec?)\\\x8f\xc2\xf5(\xec?)\\\x8f\xc2\xf5(\xec?)\\\x8f\xc2\xf5(\xec?\xbc\xbb\xbb\xbb\xbb\xbb\xeb?\xbc\xbb\xbb\xbb\xbb\xbb\xeb?O\x1b\xe8\xb4\x81N\xeb?\xbc\xbb\xbb\xbb\xbb\xbb\xeb?\xbc\xbb\xbb\xbb\xbb\xbb\xeb?\xe1z\x14\xaeG\xe1\xea?\xe1z\x14\xaeG\xe1\xea?\xe1z\x14\xaeG\xe1\xea?\xe1z\x14\xaeG\xe1\xea?\x07:m\xa0\xd3\x06\xea?\x9a\x99\x99\x99\x99\x99\xe9?\x9a\x99\x99\x99\x99\x99\xe9?\x9a\x99\x99\x99\x99\x99\xe9?\x9a\x99\x99\x99\x99\x99\xe9?\x07:m\xa0\xd3\x06\xea?\x07:m\xa0\xd3\x06\xea?\x07:m\xa0\xd3\x06\xea?\xe1z\x14\xaeG\xe1\xea?\xe1z\x14\xaeG\xe1\xea?\xe1z\x14\xaeG\xe1\xea?\xe1z\x14\xaeG\xe1\xea?)\\\x8f\xc2\xf5(\xec?)\\\x8f\xc2\xf5(\xec?)\\\x8f\xc2\xf5(\xec?)\\\x8f\xc2\xf5(\xec?)\\\x8f\xc2\xf5(\xec?)\\\x8f\xc2\xf5(\xec?)\\\x8f\xc2\xf5(\xec?)\\\x8f\xc2\xf5(\xec?O\x1b\xe8\xb4\x81N\xeb?O\x1b\xe8\xb4\x81N\xeb?\xe1z\x14\xaeG\xe1\xea?\xe1z\x14\xaeG\xe1\xea?\xe1z\x14\xaeG\xe1\xea?O\x1b\xe8\xb4\x81N\xeb?\xbc\xbb\xbb\xbb\xbb\xbb\xeb?\xbc\xbb\xbb\xbb\xbb\xbb\xeb?\xbc\xbb\xbb\xbb\xbb\xbb\xeb?O\x1b\xe8\xb4\x81N\xeb?O\x1b\xe8\xb4\x81N\xeb?O\x1b\xe8\xb4\x81N\xeb?O\x1b\xe8\xb4\x81N\xeb?O\x1b\xe8\xb4\x81N\xeb?O\x1b\xe8\xb4\x81N\xeb?O\x1b\xe8\xb4\x81N\xeb?O\x1b\xe8\xb4\x81N\xeb?O\x1b\xe8\xb4\x81N\xeb?\xbc\xbb\xbb\xbb\xbb\xbb\xeb?)\\\x8f\xc2\xf5(\xec?\xbc\xbb\xbb\xbb\xbb\xbb\xeb?)\\\x8f\xc2\xf5(\xec?)\\\x8f\xc2\xf5(\xec?)\\\x8f\xc2\xf5(\xec?\xbc\xbb\xbb\xbb\xbb\xbb\xeb?t\xda@\xa7\rt\xea?\xe1z\x14\xaeG\xe1\xea?t\xda@\xa7\rt\xea?\x9a\x99\x99\x99\x99\x99\xe9?R\xb8\x1e\x85\xebQ\xe8?R\xb8\x1e\x85\xebQ\xe8?\xe5\x17K~\xb1\xe4\xe7?\n\xd7\xa3p=\n\xe7?0\x96\xfcb\xc9/\xe6?UUUUUU\xe5?\x0et\xda@\xa7\r\xe4?333333\xe3?\xc6\x92_,\xf9\xc5\xe2?333333\xe3?\xa0\xd3\x06:m\xa0\xe3?\xa0\xd3\x06:m\xa0\xe3?\xa0\xd3\x06:m\xa0\xe3?\xa0\xd3\x06:m\xa0\xe3?\xa0\xd3\x06:m\xa0\xe3?\x0et\xda@\xa7\r\xe4?\xa0\xd3\x06:m\xa0\xe3?)\\\x8f\xc2\xf5(\xec?\xbc\xbb\xbb\xbb\xbb\xbb\xeb?\xbc\xbb\xbb\xbb\xbb\xbb\xeb?\xbc\xbb\xbb\xbb\xbb\xbb\xeb?\xbc\xbb\xbb\xbb\xbb\xbb\xeb?O\x1b\xe8\xb4\x81N\xeb?O\x1b\xe8\xb4\x81N\xeb?O\x1b\xe8\xb4\x81N\xeb?t\xda@\xa7\rt\xea?\x07:m\xa0\xd3\x06\xea?\x9a\x99\x99\x99\x99\x99\xe9?\xe5\x17K~\xb1\xe4\xe7?\xc3\xf5(\\\x8f\xc2\xe5?\xc3\xf5(\\\x8f\xc2\xe5?\xc3\xf5(\\\x8f\xc2\xe5?UUUUUU\xe5?{\x14\xaeG\xe1z\xe4?\xc6\x92_,\xf9\xc5\xe2?~\xb1\xe4\x17K~\xe1?\x11\x11\x11\x11\x11\x11\xe1?\xa4p=\n\xd7\xa3\xe0?\x11\x11\x11\x11\x11\x11\xe1?~\xb1\xe4\x17K~\xe1?\x11\x11\x11\x11\x11\x11\xe1?\x11\x11\x11\x11\x11\x11\xe1?\xa4p=\n\xd7\xa3\xe0?\xa4p=\n\xd7\xa3\xe0?)\\\x8f\xc2\xf5(\xec?\xbc\xbb\xbb\xbb\xbb\xbb\xeb?\xbc\xbb\xbb\xbb\xbb\xbb\xeb?K~\xb1\xe4\x17K\xee?\xde\xdd\xdd\xdd\xdd\xdd\xed?\xde\xdd\xdd\xdd\xdd\xdd\xed?\x03\x9d6\xd0i\x03\xed?\x96\xfcb\xc9/\x96\xec?O\x1b\xe8\xb4\x81N\xeb?\x07:m\xa0\xd3\x06\xea?wwwwww\xe7?\xc6\x92_,\xf9\xc5\xe2?7\xd0i\x03\x9d6\xe0?\xe5\x17K~\xb1\xe4\xd7?0\x96\xfcb\xc9/\xd6?\xa0\xd3\x06:m\xa0\xd3?\xb8\x1e\x85\xebQ\xb8\xce?O\x1b\xe8\xb4\x81N\xcb?0\x96\xfcb\xc9/\xc6?\xc6\x92_,\xf9\xc5\xc2?O\x1b\xe8\xb4\x81N\xbb?O\x1b\xe8\xb4\x81N\xbb?\x11\x11\x11\x11\x11\x11\xb1?\x11\x11\x11\x11\x11\x11\xb1?O\x1b\xe8\xb4\x81N\x9b?O\x1b\xe8\xb4\x81N\x9b?O\x1b\xe8\xb4\x81N\x8b?)\\\x8f\xc2\xf5(\xec?\xbc\xbb\xbb\xbb\xbb\xbb\xeb?O\x1b\xe8\xb4\x81N\xeb?\xde\xdd\xdd\xdd\xdd\xdd\xed?q=\n\xd7\xa3p\xed?\x96\xfcb\xc9/\x96\xec?\xe1z\x14\xaeG\xe1\xea?\xbfX\xf2\x8b%\xbf\xe8?\x9d6\xd0i\x03\x9d\xe6?\xa0\xd3\x06:m\xa0\xe3?\xa4p=\n\xd7\xa3\xe0?O\x1b\xe8\xb4\x81N\xdb?\xe5\x17K~\xb1\xe4\xd7?{\x14\xaeG\xe1z\xd4?\xc6\x92_,\xf9\xc5\xd2?\xb8\x1e\x85\xebQ\xb8\xce?O\x1b\xe8\xb4\x81N\xcb?0\x96\xfcb\xc9/\xc6?{\x14\xaeG\xe1z\xc4?\x11\x11\x11\x11\x11\x11\xc1?\xb8\x1e\x85\xebQ\xb8\xbe?O\x1b\xe8\xb4\x81N\xbb?O\x1b\xe8\xb4\x81N\xbb?O\x1b\xe8\xb4\x81N\xbb?O\x1b\xe8\xb4\x81N\xbb?\xe5\x17K~\xb1\xe4\xb7?\xe5\x17K~\xb1\xe4\xb7?)\\\x8f\xc2\xf5(\xec?\xbc\xbb\xbb\xbb\xbb\xbb\xeb?\xbc\xbb\xbb\xbb\xbb\xbb\xeb?O\x1b\xe8\xb4\x81N\xeb?,\xf9\xc5\x92_,\xe9?\xe5\x17K~\xb1\xe4\xe7?\n\xd7\xa3p=\n\xe7?{\x14\xaeG\xe1z\xe4?\xc6\x92_,\xf9\xc5\xe2?\x93_,\xf9\xc5\x92\xdf?UUUUUU\xd5?\x11\x11\x11\x11\x11\x11\xd1?\xe5\x17K~\xb1\xe4\xc7?{\x14\xaeG\xe1z\xc4?\xb8\x1e\x85\xebQ\xb8\xbe?\xe5\x17K~\xb1\xe4\xb7?\x11\x11\x11\x11\x11\x11\xb1?O\x1b\xe8\xb4\x81N\x9b?\x00\x00\x00\x00\x00\x00\x00\x00\x00\x00\x00\x00\x00\x00\x00\x00\x00\x00\x00\x00\x00\x00\x00\x00\x00\x00\x00\x00\x00\x00\x00\x00\x00\x00\x00\x00\x00\x00\x00\x00\x00\x00\x00\x00\x00\x00\x00\x00\x00\x00\x00\x00\x00\x00\x00\x00\x00\x00\x00\x00\x00\x00\x00\x00\x00\x00\x00\x00\x00\x00\x00\x00)\\\x8f\xc2\xf5(\xec?\xbc\xbb\xbb\xbb\xbb\xbb\xeb?\xbc\xbb\xbb\xbb\xbb\xbb\xeb?\xbc\xbb\xbb\xbb\xbb\xbb\xeb?\x9a\x99\x99\x99\x99\x99\xe9?\n\xd7\xa3p=\n\xe7?\xa0\xd3\x06:m\xa0\xe3?t\xda@\xa7\rt\xda?\n\xd7\xa3p=\n\xd7?7\xd0i\x03\x9d6\xd0?O\x1b\xe8\xb4\x81N\xcb?O\x1b\xe8\xb4\x81N\xcb?{\x14\xaeG\xe1z\xc4?\xb8\x1e\x85\xebQ\xb8\xbe?\xb8\x1e\x85\xebQ\xb8\xbe?\xb8\x1e\x85\xebQ\xb8\xbe?{\x14\xaeG\xe1z\xb4?{\x14\xaeG\xe1z\xb4?{\x14\xaeG\xe1z\xb4?{\x14\xaeG\xe1z\xb4?{\x14\xaeG\xe1z\xb4?{\x14\xaeG\xe1z\xb4?{\x14\xaeG\xe1z\xb4?{\x14\xaeG\xe1z\xb4?{\x14\xaeG\xe1z\xb4?{\x14\xaeG\xe1z\xb4?\x00\x00\x00\x00\x00\x00\x00\x00)\\\x8f\xc2\xf5(\xec?\xbc\xbb\xbb\xbb\xbb\xbb\xeb?\xbc\xbb\xbb\xbb\xbb\xbb\xeb?\x9a\x99\x99\x99\x99\x99\xe9?\n\xd7\xa3p=\n\xe7?UUUUUU\xe5?Y\xf2\x8b%\xbfX\xe2?\x93_,\xf9\xc5\x92\xdf?\x9a\x99\x99\x99\x99\x99\xd9?UUUUUU\xd5?\xc6\x92_,\xf9\xc5\xd2?7\xd0i\x03\x9d6\xd0?O\x1b\xe8\xb4\x81N\xcb?0\x96\xfcb\xc9/\xc6?\xc6\x92_,\xf9\xc5\xc2?\xb8\x1e\x85\xebQ\xb8\xbe?O\x1b\xe8\xb4\x81N\xbb?{\x14\xaeG\xe1z\xc4?{\x14\xaeG\xe1z\xc4?{\x14\xaeG\xe1z\xc4?{\x14\xaeG\xe1z\xc4?{\x14\xaeG\xe1z\xc4?{\x14\xaeG\xe1z\xc4?\xb8\x1e\x85\xebQ\xb8\xbe?\xb8\x1e\x85\xebQ\xb8\xbe?\xb8\x1e\x85\xebQ\xb8\xbe?\xe5\x17K~\xb1\xe4\xb7?\x00\x00\x00\x00\x00\x00\xf0?\x00\x00\x00\x00\x00\x00\xf0?\x00\x00\x00\x00\x00\x00\xf0?\x00\x00\x00\x00\x00\x00\xf0?\x00\x00\x00\x00\x00\x00\xf0?\x00\x00\x00\x00\x00\x00\xf0?\x00\x00\x00\x00\x00\x00\xf0?\x00\x00\x00\x00\x00\x00\xf0?\x00\x00\x00\x00\x00\x00\xf0?\x00\x00\x00\x00\x00\x00\xf0?\x00\x00\x00\x00\x00\x00\xf0?\x00\x00\x00\x00\x00\x00\xf0?\x00\x00\x00\x00\x00\x00\xf0?\x00\x00\x00\x00\x00\x00\xf0?\x00\x00\x00\x00\x00\x00\xf0?\x00\x00\x00\x00\x00\x00\xf0?\x00\x00\x00\x00\x00\x00\xf0?\x00\x00\x00\x00\x00\x00\xf0?\x00\x00\x00\x00\x00\x00\xf0?\x00\x00\x00\x00\x00\x00\xf0?\x00\x00\x00\x00\x00\x00\xf0?\x00\x00\x00\x00\x00\x00\xf0?\x00\x00\x00\x00\x00\x00\xf0?\x00\x00\x00\x00\x00\x00\xf0?\x00\x00\x00\x00\x00\x00\xf0?\x00\x00\x00\x00\x00\x00\xf0?\x00\x00\x00\x00\x00\x00\xf0?\x00\x00\x00\x00\x00\x00\xf0?\x00\x00\x00\x00\x00\x00\xf0?\x00\x00\x00\x00\x00\x00\xf0?\x00\x00\x00\x00\x00\x00\xf0?\x00\x00\x00\x00\x00\x00\xf0?\x00\x00\x00\x00\x00\x00\xf0?\x00\x00\x00\x00\x00\x00\xf0?\x00\x00\x00\x00\x00\x00\xf0?\x00\x00\x00\x00\x00\x00\xf0?\x00\x00\x00\x00\x00\x00\xf0?\x00\x00\x00\x00\x00\x00\xf0?\x00\x00\x00\x00\x00\x00\xf0?\x00\x00\x00\x00\x00\x00\xf0?\x00\x00\x00\x00\x00\x00\xf0?\x00\x00\x00\x00\x00\x00\xf0?\x00\x00\x00\x00\x00\x00\xf0?\x00\x00\x00\x00\x00\x00\xf0?\x00\x00\x00\x00\x00\x00\xf0?\x00\x00\x00\x00\x00\x00\xf0?\x00\x00\x00\x00\x00\x00\xf0?\x00\x00\x00\x00\x00\x00\xf0?\x00\x00\x00\x00\x00\x00\xf0?\x00\x00\x00\x00\x00\x00\xf0?\x00\x00\x00\x00\x00\x00\xf0?\x00\x00\x00\x00\x00\x00\xf0?\x00\x00\x00\x00\x00\x00\xf0?\x00\x00\x00\x00\x00\x00\xf0?\x00\x00\x00\x00\x00\x00\xf0?\x00\x00\x00\x00\x00\x00\xf0?\x00\x00\x00\x00\x00\x00\xf0?\x00\x00\x00\x00\x00\x00\xf0?\x00\x00\x00\x00\x00\x00\xf0?\x00\x00\x00\x00\x00\x00\xf0?\x00\x00\x00\x00\x00\x00\xf0?\x00\x00\x00\x00\x00\x00\xf0?\x00\x00\x00\x00\x00\x00\xf0?\x00\x00\x00\x00\x00\x00\xf0?\x00\x00\x00\x00\x00\x00\xf0?\x00\x00\x00\x00\x00\x00\xf0?\x00\x00\x00\x00\x00\x00\xf0?\x00\x00\x00\x00\x00\x00\xf0?\x00\x00\x00\x00\x00\x00\xf0?\x00\x00\x00\x00\x00\x00\xf0?\x00\x00\x00\x00\x00\x00\xf0?\x00\x00\x00\x00\x00\x00\xf0?\x00\x00\x00\x00\x00\x00\xf0?\x00\x00\x00\x00\x00\x00\xf0?\x00\x00\x00\x00\x00\x00\xf0?\x00\x00\x00\x00\x00\x00\xf0?\x00\x00\x00\x00\x00\x00\xf0?\x00\x00\x00\x00\x00\x00\xf0?\x00\x00\x00\x00\x00\x00\xf0?\x00\x00\x00\x00\x00\x00\xf0?\x00\x00\x00\x00\x00\x00\xf0?\x00\x00\x00\x00\x00\x00\xf0?\x00\x00\x00\x00\x00\x00\xf0?\x00\x00\x00\x00\x00\x00\xf0?\x00\x00\x00\x00\x00\x00\xf0?\x00\x00\x00\x00\x00\x00\xf0?\x00\x00\x00\x00\x00\x00\xf0?\x00\x00\x00\x00\x00\x00\xf0?\x00\x00\x00\x00\x00\x00\xf0?\x00\x00\x00\x00\x00\x00\xf0?\x00\x00\x00\x00\x00\x00\xf0?\x00\x00\x00\x00\x00\x00\xf0?\x00\x00\x00\x00\x00\x00\xf0?\x00\x00\x00\x00\x00\x00\xf0?\x00\x00\x00\x00\x00\x00\xf0?\x00\x00\x00\x00\x00\x00\xf0?\x00\x00\x00\x00\x00\x00\xf0?\x00\x00\x00\x00\x00\x00\xf0?\x00\x00\x00\x00\x00\x00\xf0?\x00\x00\x00\x00\x00\x00\xf0?\x00\x00\x00\x00\x00\x00\xf0?\x00\x00\x00\x00\x00\x00\xf0?\x00\x00\x00\x00\x00\x00\xf0?\x00\x00\x00\x00\x00\x00\xf0?\x00\x00\x00\x00\x00\x00\xf0?\x00\x00\x00\x00\x00\x00\xf0?\x00\x00\x00\x00\x00\x00\xf0?\x00\x00\x00\x00\x00\x00\xf0?\x00\x00\x00\x00\x00\x00\xf0?\x00\x00\x00\x00\x00\x00\xf0?\x00\x00\x00\x00\x00\x00\xf0?\x00\x00\x00\x00\x00\x00\xf0?\x00\x00\x00\x00\x00\x00\xf0?\x00\x00\x00\x00\x00\x00\xf0?\x00\x00\x00\x00\x00\x00\xf0?\x00\x00\x00\x00\x00\x00\xf0?\x00\x00\x00\x00\x00\x00\xf0?\x00\x00\x00\x00\x00\x00\xf0?\x00\x00\x00\x00\x00\x00\xf0?\x00\x00\x00\x00\x00\x00\xf0?\x00\x00\x00\x00\x00\x00\xf0?\x00\x00\x00\x00\x00\x00\xf0?\x00\x00\x00\x00\x00\x00\xf0?\x00\x00\x00\x00\x00\x00\xf0?\x00\x00\x00\x00\x00\x00\xf0?\x00\x00\x00\x00\x00\x00\xf0?\x00\x00\x00\x00\x00\x00\xf0?\x00\x00\x00\x00\x00\x00\xf0?\x00\x00\x00\x00\x00\x00\xf0?\x00\x00\x00\x00\x00\x00\xf0?\x00\x00\x00\x00\x00\x00\xf0?\x00\x00\x00\x00\x00\x00\xf0?\x00\x00\x00\x00\x00\x00\xf0?\x00\x00\x00\x00\x00\x00\xf0?\x00\x00\x00\x00\x00\x00\xf0?\x00\x00\x00\x00\x00\x00\xf0?\x00\x00\x00\x00\x00\x00\xf0?\x00\x00\x00\x00\x00\x00\xf0?\x00\x00\x00\x00\x00\x00\xf0?\x00\x00\x00\x00\x00\x00\xf0?\x00\x00\x00\x00\x00\x00\xf0?\x00\x00\x00\x00\x00\x00\xf0?\x00\x00\x00\x00\x00\x00\xf0?\x00\x00\x00\x00\x00\x00\xf0?\x00\x00\x00\x00\x00\x00\xf0?\x00\x00\x00\x00\x00\x00\xf0?\x00\x00\x00\x00\x00\x00\xf0?\x00\x00\x00\x00\x00\x00\xf0?\x00\x00\x00\x00\x00\x00\xf0?\x00\x00\x00\x00\x00\x00\xf0?\x00\x00\x00\x00\x00\x00\xf0?\x00\x00\x00\x00\x00\x00\xf0?\x00\x00\x00\x00\x00\x00\xf0?\x00\x00\x00\x00\x00\x00\xf0?\x00\x00\x00\x00\x00\x00\xf0?\x00\x00\x00\x00\x00\x00\xf0?\x00\x00\x00\x00\x00\x00\xf0?\x00\x00\x00\x00\x00\x00\xf0?\x00\x00\x00\x00\x00\x00\xf0?\x00\x00\x00\x00\x00\x00\xf0?\x00\x00\x00\x00\x00\x00\xf0?\x00\x00\x00\x00\x00\x00\xf0?\x00\x00\x00\x00\x00\x00\xf0?\x00\x00\x00\x00\x00\x00\xf0?\x00\x00\x00\x00\x00\x00\xf0?\x00\x00\x00\x00\x00\x00\xf0?\x00\x00\x00\x00\x00\x00\xf0?\x00\x00\x00\x00\x00\x00\xf0?\x00\x00\x00\x00\x00\x00\xf0?\x00\x00\x00\x00\x00\x00\xf0?\x00\x00\x00\x00\x00\x00\xf0?\x00\x00\x00\x00\x00\x00\xf0?\x00\x00\x00\x00\x00\x00\xf0?\x00\x00\x00\x00\x00\x00\xf0?\x00\x00\x00\x00\x00\x00\xf0?\x00\x00\x00\x00\x00\x00\xf0?\x00\x00\x00\x00\x00\x00\xf0?\x00\x00\x00\x00\x00\x00\xf0?\x93_,\xf9\xc5\x92\xef?&\xbfX\xf2\x8b%\xef?&\xbfX\xf2\x8b%\xef?&\xbfX\xf2\x8b%\xef?\xb8\x1e\x85\xebQ\xb8\xee?K~\xb1\xe4\x17K\xee?K~\xb1\xe4\x17K\xee?K~\xb1\xe4\x17K\xee?K~\xb1\xe4\x17K\xee?\xb8\x1e\x85\xebQ\xb8\xee?K~\xb1\xe4\x17K\xee?\x00\x00\x00\x00\x00\x00\xf0?\x00\x00\x00\x00\x00\x00\xf0?\x00\x00\x00\x00\x00\x00\xf0?\x00\x00\x00\x00\x00\x00\xf0?\x00\x00\x00\x00\x00\x00\xf0?\x00\x00\x00\x00\x00\x00\xf0?\x00\x00\x00\x00\x00\x00\xf0?\x00\x00\x00\x00\x00\x00\xf0?\x00\x00\x00\x00\x00\x00\xf0?\x00\x00\x00\x00\x00\x00\xf0?\x00\x00\x00\x00\x00\x00\xf0?\x00\x00\x00\x00\x00\x00\xf0?\x00\x00\x00\x00\x00\x00\xf0?\x00\x00\x00\x00\x00\x00\xf0?\x00\x00\x00\x00\x00\x00\xf0?\x00\x00\x00\x00\x00\x00\xf0?\x00\x00\x00\x00\x00\x00\xf0?\x00\x00\x00\x00\x00\x00\xf0?\x00\x00\x00\x00\x00\x00\xf0?\x00\x00\x00\x00\x00\x00\xf0?\x00\x00\x00\x00\x00\x00\xf0?\x00\x00\x00\x00\x00\x00\xf0?\x00\x00\x00\x00\x00\x00\xf0?\x00\x00\x00\x00\x00\x00\xf0?\x00\x00\x00\x00\x00\x00\xf0?\x00\x00\x00\x00\x00\x00\xf0?\x00\x00\x00\x00\x00\x00\xf0?\x00\x00\x00\x00\x00\x00\xf0?\x00\x00\x00\x00\x00\x00\xf0?\x00\x00\x00\x00\x00\x00\xf0?\x00\x00\x00\x00\x00\x00\xf0?\x00\x00\x00\x00\x00\x00\xf0?\x00\x00\x00\x00\x00\x00\xf0?\x00\x00\x00\x00\x00\x00\xf0?\x00\x00\x00\x00\x00\x00\xf0?\x00\x00\x00\x00\x00\x00\xf0?\x00\x00\x00\x00\x00\x00\xf0?\x00\x00\x00\x00\x00\x00\xf0?\x00\x00\x00\x00\x00\x00\xf0?\x00\x00\x00\x00\x00\x00\xf0?\x00\x00\x00\x00\x00\x00\xf0?\x00\x00\x00\x00\x00\x00\xf0?\x00\x00\x00\x00\x00\x00\xf0?\x00\x00\x00\x00\x00\x00\xf0?\x00\x00\x00\x00\x00\x00\xf0?\x00\x00\x00\x00\x00\x00\xf0?\x00\x00\x00\x00\x00\x00\xf0?\x00\x00\x00\x00\x00\x00\xf0?\x00\x00\x00\x00\x00\x00\xf0?\x00\x00\x00\x00\x00\x00\xf0?\x00\x00\x00\x00\x00\x00\xf0?\x00\x00\x00\x00\x00\x00\xf0?\x00\x00\x00\x00\x00\x00\xf0?\x00\x00\x00\x00\x00\x00\xf0?\x00\x00\x00\x00\x00\x00\xf0?\x00\x00\x00\x00\x00\x00\xf0?\x00\x00\x00\x00\x00\x00\xf0?\x00\x00\x00\x00\x00\x00\xf0?\x00\x00\x00\x00\x00\x00\xf0?\x93_,\xf9\xc5\x92\xef?\xb8\x1e\x85\xebQ\xb8\xee?q=\n\xd7\xa3p\xed?\xe1z\x14\xaeG\xe1\xea?\xe5\x17K~\xb1\xe4\xe7?0\x96\xfcb\xc9/\xe6?{\x14\xaeG\xe1z\xe4?Y\xf2\x8b%\xbfX\xe2?\x11\x11\x11\x11\x11\x11\xe1?\xa4p=\n\xd7\xa3\xe0?7\xd0i\x03\x9d6\xe0?\xb8\x1e\x85\xebQ\xb8\xde?\xde\xdd\xdd\xdd\xdd\xdd\xdd?\x03\x9d6\xd0i\x03\xdd?)\\\x8f\xc2\xf5(\xdc?)\\\x8f\xc2\xf5(\xdc?t\xda@\xa7\rt\xda?t\xda@\xa7\rt\xda?t\xda@\xa7\rt\xda?t\xda@\xa7\rt\xda?\x9a\x99\x99\x99\x99\x99\xd9?\xbfX\xf2\x8b%\xbf\xd8?\x00\x00\x00\x00\x00\x00\xf0?\x00\x00\x00\x00\x00\x00\xf0?\x00\x00\x00\x00\x00\x00\xf0?\x00\x00\x00\x00\x00\x00\xf0?&\xbfX\xf2\x8b%\xef?q=\n\xd7\xa3p\xed?\xbc\xbb\xbb\xbb\xbb\xbb\xeb?O\x1b\xe8\xb4\x81N\xeb?\x9a\x99\x99\x99\x99\x99\xe9?R\xb8\x1e\x85\xebQ\xe8?\xe8\xb4\x81N\x1b\xe8\xe4?\xa0\xd3\x06:m\xa0\xe3?\xb8\x1e\x85\xebQ\xb8\xde?\x9a\x99\x99\x99\x99\x99\xd9?\xe5\x17K~\xb1\xe4\xd7?\xe5\x17K~\xb1\xe4\xd7?\n\xd7\xa3p=\n\xd7?0\x96\xfcb\xc9/\xd6?{\x14\xaeG\xe1z\xd4?{\x14\xaeG\xe1z\xd4?{\x14\xaeG\xe1z\xd4?{\x14\xaeG\xe1z\xd4?\xa0\xd3\x06:m\xa0\xd3?\xa0\xd3\x06:m\xa0\xd3?\xa0\xd3\x06:m\xa0\xd3?\xc6\x92_,\xf9\xc5\xd2?\xc6\x92_,\xf9\xc5\xd2?\x00\x00\x00\x00\x00\x00\xf0?\x00\x00\x00\x00\x00\x00\xf0?\x00\x00\x00\x00\x00\x00\xf0?&\xbfX\xf2\x8b%\xef?\x03\x9d6\xd0i\x03\xed?t\xda@\xa7\rt\xea?\n\xd7\xa3p=\n\xe7?333333\xe3?7\xd0i\x03\x9d6\xe0?0\x96\xfcb\xc9/\xd6?O\x1b\xe8\xb4\x81N\xcb?{\x14\xaeG\xe1z\xc4?O\x1b\xe8\xb4\x81N\xbb?\xe5\x17K~\xb1\xe4\xb7?\xe5\x17K~\xb1\xe4\xb7?\xe5\x17K~\xb1\xe4\xb7?\xe5\x17K~\xb1\xe4\xb7?{\x14\xaeG\xe1z\xb4?{\x14\xaeG\xe1z\xb4?{\x14\xaeG\xe1z\xb4?{\x14\xaeG\xe1z\xb4?{\x14\xaeG\xe1z\xb4?{\x14\xaeG\xe1z\xb4?{\x14\xaeG\xe1z\xb4?{\x14\xaeG\xe1z\xb4?{\x14\xaeG\xe1z\xb4?{\x14\xaeG\xe1z\xb4?\x00\x00\x00\x00\x00\x00\xf0?\x00\x00\x00\x00\x00\x00\xf0?\x00\x00\x00\x00\x00\x00\xf0?\x93_,\xf9\xc5\x92\xef?\xb8\x1e\x85\xebQ\xb8\xee?\x03\x9d6\xd0i\x03\xed?\xbc\xbb\xbb\xbb\xbb\xbb\xeb?\xe1z\x14\xaeG\xe1\xea?,\xf9\xc5\x92_,\xe9?\n\xd7\xa3p=\n\xe7?\xe8\xb4\x81N\x1b\xe8\xe4?\x93_,\xf9\xc5\x92\xdf?O\x1b\xe8\xb4\x81N\xdb?\xe5\x17K~\xb1\xe4\xd7?UUUUUU\xd5?\xc6\x92_,\xf9\xc5\xd2?7\xd0i\x03\x9d6\xd0?O\x1b\xe8\xb4\x81N\xcb?0\x96\xfcb\xc9/\xc6?\xc6\x92_,\xf9\xc5\xc2?\xc6\x92_,\xf9\xc5\xc2?\xb8\x1e\x85\xebQ\xb8\xbe?O\x1b\xe8\xb4\x81N\xbb?O\x1b\xe8\xb4\x81N\xbb?O\x1b\xe8\xb4\x81N\xbb?O\x1b\xe8\xb4\x81N\xbb?O\x1b\xe8\xb4\x81N\xbb?\x00\x00\x00\x00\x00\x00\xf0?\x00\x00\x00\x00\x00\x00\xf0?\x00\x00\x00\x00\x00\x00\xf0?\x00\x00\x00\x00\x00\x00\xf0?\x00\x00\x00\x00\x00\x00\xf0?\x00\x00\x00\x00\x00\x00\xf0?\x00\x00\x00\x00\x00\x00\xf0?\x00\x00\x00\x00\x00\x00\xf0?\x00\x00\x00\x00\x00\x00\xf0?\x00\x00\x00\x00\x00\x00\xf0?\x00\x00\x00\x00\x00\x00\xf0?\x00\x00\x00\x00\x00\x00\xf0?\x00\x00\x00\x00\x00\x00\xf0?\x00\x00\x00\x00\x00\x00\xf0?\x00\x00\x00\x00\x00\x00\xf0?\x00\x00\x00\x00\x00\x00\xf0?\x00\x00\x00\x00\x00\x00\xf0?\x00\x00\x00\x00\x00\x00\xf0?\x00\x00\x00\x00\x00\x00\xf0?\x00\x00\x00\x00\x00\x00\xf0?\x00\x00\x00\x00\x00\x00\xf0?\x00\x00\x00\x00\x00\x00\xf0?\x00\x00\x00\x00\x00\x00\xf0?\x00\x00\x00\x00\x00\x00\xf0?\x00\x00\x00\x00\x00\x00\xf0?\x00\x00\x00\x00\x00\x00\xf0?\x00\x00\x00\x00\x00\x00\xf0?\x00\x00\x00\x00\x00\x00\xf0?\x00\x00\x00\x00\x00\x00\xf0?\x00\x00\x00\x00\x00\x00\xf0?\x00\x00\x00\x00\x00\x00\xf0?\x00\x00\x00\x00\x00\x00\xf0?\x00\x00\x00\x00\x00\x00\xf0?\x00\x00\x00\x00\x00\x00\xf0?\x00\x00\x00\x00\x00\x00\xf0?\x00\x00\x00\x00\x00\x00\xf0?\x00\x00\x00\x00\x00\x00\xf0?\x00\x00\x00\x00\x00\x00\xf0?\x00\x00\x00\x00\x00\x00\xf0?\x00\x00\x00\x00\x00\x00\xf0?\x00\x00\x00\x00\x00\x00\xf0?\x00\x00\x00\x00\x00\x00\xf0?\x00\x00\x00\x00\x00\x00\xf0?\x00\x00\x00\x00\x00\x00\xf0?\x00\x00\x00\x00\x00\x00\xf0?\x00\x00\x00\x00\x00\x00\xf0?\x00\x00\x00\x00\x00\x00\xf0?\x00\x00\x00\x00\x00\x00\xf0?\x00\x00\x00\x00\x00\x00\xf0?\x00\x00\x00\x00\x00\x00\xf0?\x00\x00\x00\x00\x00\x00\xf0?\x00\x00\x00\x00\x00\x00\xf0?\x00\x00\x00\x00\x00\x00\xf0?\x00\x00\x00\x00\x00\x00\xf0?\x00\x00\x00\x00\x00\x00\xf0?\x00\x00\x00\x00\x00\x00\xf0?\x00\x00\x00\x00\x00\x00\xf0?\x00\x00\x00\x00\x00\x00\xf0?\x00\x00\x00\x00\x00\x00\xf0?\x00\x00\x00\x00\x00\x00\xf0?\x00\x00\x00\x00\x00\x00\xf0?\x00\x00\x00\x00\x00\x00\xf0?\x00\x00\x00\x00\x00\x00\xf0?\x00\x00\x00\x00\x00\x00\xf0?\x00\x00\x00\x00\x00\x00\xf0?\x00\x00\x00\x00\x00\x00\xf0?\x00\x00\x00\x00\x00\x00\xf0?\x00\x00\x00\x00\x00\x00\xf0?\x00\x00\x00\x00\x00\x00\xf0?\x00\x00\x00\x00\x00\x00\xf0?\x00\x00\x00\x00\x00\x00\xf0?\x00\x00\x00\x00\x00\x00\xf0?\x00\x00\x00\x00\x00\x00\xf0?\x00\x00\x00\x00\x00\x00\xf0?\x00\x00\x00\x00\x00\x00\xf0?\x00\x00\x00\x00\x00\x00\xf0?\x00\x00\x00\x00\x00\x00\xf0?\x00\x00\x00\x00\x00\x00\xf0?\x00\x00\x00\x00\x00\x00\xf0?\x00\x00\x00\x00\x00\x00\xf0?\x00\x00\x00\x00\x00\x00\xf0?\x00\x00\x00\x00\x00\x00\xf0?\x00\x00\x00\x00\x00\x00\xf0?\x00\x00\x00\x00\x00\x00\xf0?\x00\x00\x00\x00\x00\x00\xf0?\x00\x00\x00\x00\x00\x00\xf0?\x00\x00\x00\x00\x00\x00\xf0?\x00\x00\x00\x00\x00\x00\xf0?\x00\x00\x00\x00\x00\x00\xf0?\x00\x00\x00\x00\x00\x00\xf0?\x00\x00\x00\x00\x00\x00\xf0?\x93_,\xf9\xc5\x92\xef?\x93_,\xf9\xc5\x92\xef?\x93_,\xf9\xc5\x92\xef?\x93_,\xf9\xc5\x92\xef?\x93_,\xf9\xc5\x92\xef?&\xbfX\xf2\x8b%\xef?&\xbfX\xf2\x8b%\xef?&\xbfX\xf2\x8b%\xef?&\xbfX\xf2\x8b%\xef?&\xbfX\xf2\x8b%\xef?&\xbfX\xf2\x8b%\xef?&\xbfX\xf2\x8b%\xef?&\xbfX\xf2\x8b%\xef?&\xbfX\xf2\x8b%\xef?&\xbfX\xf2\x8b%\xef?&\xbfX\xf2\x8b%\xef?&\xbfX\xf2\x8b%\xef?\x00\x00\x00\x00\x00\x00\xf0?\x00\x00\x00\x00\x00\x00\xf0?\x00\x00\x00\x00\x00\x00\xf0?\x00\x00\x00\x00\x00\x00\xf0?\x00\x00\x00\x00\x00\x00\xf0?\x93_,\xf9\xc5\x92\xef?\x93_,\xf9\xc5\x92\xef?\x93_,\xf9\xc5\x92\xef?&\xbfX\xf2\x8b%\xef?\xb8\x1e\x85\xebQ\xb8\xee?\xde\xdd\xdd\xdd\xdd\xdd\xed?\xde\xdd\xdd\xdd\xdd\xdd\xed?\x96\xfcb\xc9/\x96\xec?)\\\x8f\xc2\xf5(\xec?)\\\x8f\xc2\xf5(\xec?O\x1b\xe8\xb4\x81N\xeb?t\xda@\xa7\rt\xea?\x9a\x99\x99\x99\x99\x99\xe9?,\xf9\xc5\x92_,\xe9?\xbfX\xf2\x8b%\xbf\xe8?R\xb8\x1e\x85\xebQ\xe8?\xe5\x17K~\xb1\xe4\xe7?\xe5\x17K~\xb1\xe4\xe7?\n\xd7\xa3p=\n\xe7?\x9d6\xd0i\x03\x9d\xe6?0\x96\xfcb\xc9/\xe6?0\x96\xfcb\xc9/\xe6?\x00\x00\x00\x00\x00\x00\xf0?\x00\x00\x00\x00\x00\x00\xf0?\x00\x00\x00\x00\x00\x00\xf0?\x00\x00\x00\x00\x00\x00\xf0?\x00\x00\x00\x00\x00\x00\xf0?\x93_,\xf9\xc5\x92\xef?\x93_,\xf9\xc5\x92\xef?\x93_,\xf9\xc5\x92\xef?\xb8\x1e\x85\xebQ\xb8\xee?\xb8\x1e\x85\xebQ\xb8\xee?\xb8\x1e\x85\xebQ\xb8\xee?\xb8\x1e\x85\xebQ\xb8\xee?K~\xb1\xe4\x17K\xee?K~\xb1\xe4\x17K\xee?\x03\x9d6\xd0i\x03\xed?\x96\xfcb\xc9/\x96\xec?\x96\xfcb\xc9/\x96\xec?\xbc\xbb\xbb\xbb\xbb\xbb\xeb?O\x1b\xe8\xb4\x81N\xeb?\xbc\xbb\xbb\xbb\xbb\xbb\xeb?\xbc\xbb\xbb\xbb\xbb\xbb\xeb?\xbc\xbb\xbb\xbb\xbb\xbb\xeb?\xe1z\x14\xaeG\xe1\xea?\xe1z\x14\xaeG\xe1\xea?t\xda@\xa7\rt\xea?t\xda@\xa7\rt\xea?t\xda@\xa7\rt\xea?\x00\x00\x00\x00\x00\x00\xf0?\x00\x00\x00\x00\x00\x00\xf0?\x00\x00\x00\x00\x00\x00\xf0?\x93_,\xf9\xc5\x92\xef?\x93_,\xf9\xc5\x92\xef?K~\xb1\xe4\x17K\xee?\xde\xdd\xdd\xdd\xdd\xdd\xed?\xbc\xbb\xbb\xbb\xbb\xbb\xeb?\x07:m\xa0\xd3\x06\xea?\x9d6\xd0i\x03\x9d\xe6?{\x14\xaeG\xe1z\xe4?\x0et\xda@\xa7\r\xe4?333333\xe3?333333\xe3?\xecQ\xb8\x1e\x85\xeb\xe1?\x11\x11\x11\x11\x11\x11\xe1?\xa4p=\n\xd7\xa3\xe0?\xa4p=\n\xd7\xa3\xe0?7\xd0i\x03\x9d6\xe0?\x93_,\xf9\xc5\x92\xdf?\xb8\x1e\x85\xebQ\xb8\xde?\xb8\x1e\x85\xebQ\xb8\xde?\xb8\x1e\x85\xebQ\xb8\xde?\xb8\x1e\x85\xebQ\xb8\xde?\xde\xdd\xdd\xdd\xdd\xdd\xdd?\xde\xdd\xdd\xdd\xdd\xdd\xdd?\xde\xdd\xdd\xdd\xdd\xdd\xdd?\x00\x00\x00\x00\x00\x00\xf0?\x00\x00\x00\x00\x00\x00\xf0?\x00\x00\x00\x00\x00\x00\xf0?\x00\x00\x00\x00\x00\x00\xf0?\x00\x00\x00\x00\x00\x00\xf0?\x93_,\xf9\xc5\x92\xef?\x93_,\xf9\xc5\x92\xef?\x93_,\xf9\xc5\x92\xef?\x93_,\xf9\xc5\x92\xef?&\xbfX\xf2\x8b%\xef?\xde\xdd\xdd\xdd\xdd\xdd\xed?q=\n\xd7\xa3p\xed?\x03\x9d6\xd0i\x03\xed?\x96\xfcb\xc9/\x96\xec?)\\\x8f\xc2\xf5(\xec?\xbc\xbb\xbb\xbb\xbb\xbb\xeb?\x07:m\xa0\xd3\x06\xea?\xbfX\xf2\x8b%\xbf\xe8?R\xb8\x1e\x85\xebQ\xe8?\xe5\x17K~\xb1\xe4\xe7?\xe5\x17K~\xb1\xe4\xe7?0\x96\xfcb\xc9/\xe6?0\x96\xfcb\xc9/\xe6?0\x96\xfcb\xc9/\xe6?0\x96\xfcb\xc9/\xe6?\xc3\xf5(\\\x8f\xc2\xe5?UUUUUU\xe5?\x00\x00\x00\x00\x00\x00\xf0?\x00\x00\x00\x00\x00\x00\xf0?\x00\x00\x00\x00\x00\x00\xf0?\x00\x00\x00\x00\x00\x00\xf0?\x93_,\xf9\xc5\x92\xef?\x93_,\xf9\xc5\x92\xef?&\xbfX\xf2\x8b%\xef?\xb8\x1e\x85\xebQ\xb8\xee?q=\n\xd7\xa3p\xed?O\x1b\xe8\xb4\x81N\xeb?0\x96\xfcb\xc9/\xe6?333333\xe3?\xecQ\xb8\x1e\x85\xeb\xe1?\x93_,\xf9\xc5\x92\xdf?\x03\x9d6\xd0i\x03\xdd?O\x1b\xe8\xb4\x81N\xdb?t\xda@\xa7\rt\xda?\xbfX\xf2\x8b%\xbf\xd8?\xe5\x17K~\xb1\xe4\xd7?0\x96\xfcb\xc9/\xd6?UUUUUU\xd5?UUUUUU\xd5?UUUUUU\xd5?UUUUUU\xd5?{\x14\xaeG\xe1z\xd4?\xa0\xd3\x06:m\xa0\xd3?\xecQ\xb8\x1e\x85\xeb\xd1?\x00\x00\x00\x00\x00\x00\xf0?\x00\x00\x00\x00\x00\x00\xf0?\x00\x00\x00\x00\x00\x00\xf0?\x00\x00\x00\x00\x00\x00\xf0?\x93_,\xf9\xc5\x92\xef?&\xbfX\xf2\x8b%\xef?\xb8\x1e\x85\xebQ\xb8\xee?\xbc\xbb\xbb\xbb\xbb\xbb\xeb?\xe5\x17K~\xb1\xe4\xe7?\xe8\xb4\x81N\x1b\xe8\xe4?Y\xf2\x8b%\xbfX\xe2?)\\\x8f\xc2\xf5(\xdc?UUUUUU\xd5?\xa0\xd3\x06:m\xa0\xd3?7\xd0i\x03\x9d6\xd0?O\x1b\xe8\xb4\x81N\xcb?\xe5\x17K~\xb1\xe4\xc7?0\x96\xfcb\xc9/\xc6?{\x14\xaeG\xe1z\xc4?\xc6\x92_,\xf9\xc5\xc2?\xc6\x92_,\xf9\xc5\xc2?\x11\x11\x11\x11\x11\x11\xc1?\x11\x11\x11\x11\x11\x11\xc1?\x11\x11\x11\x11\x11\x11\xc1?\xb8\x1e\x85\xebQ\xb8\xbe?\xb8\x1e\x85\xebQ\xb8\xbe?\xb8\x1e\x85\xebQ\xb8\xbe?\x00\x00\x00\x00\x00\x00\xf0?\x00\x00\x00\x00\x00\x00\xf0?\x00\x00\x00\x00\x00\x00\xf0?\x00\x00\x00\x00\x00\x00\xf0?\x93_,\xf9\xc5\x92\xef?&\xbfX\xf2\x8b%\xef?\xb8\x1e\x85\xebQ\xb8\xee?\x03\x9d6\xd0i\x03\xed?\x9a\x99\x99\x99\x99\x99\xe9?UUUUUU\xe5?\xb8\x1e\x85\xebQ\xb8\xde?\n\xd7\xa3p=\n\xd7?\xecQ\xb8\x1e\x85\xeb\xd1?\xb8\x1e\x85\xebQ\xb8\xce?\xb8\x1e\x85\xebQ\xb8\xce?O\x1b\xe8\xb4\x81N\xcb?O\x1b\xe8\xb4\x81N\xcb?O\x1b\xe8\xb4\x81N\xcb?0\x96\xfcb\xc9/\xc6?{\x14\xaeG\xe1z\xc4?{\x14\xaeG\xe1z\xc4?{\x14\xaeG\xe1z\xc4?{\x14\xaeG\xe1z\xc4?{\x14\xaeG\xe1z\xc4?{\x14\xaeG\xe1z\xc4?\xc6\x92_,\xf9\xc5\xc2?\xc6\x92_,\xf9\xc5\xc2?\x00\x00\x00\x00\x00\x00\xf0?\x00\x00\x00\x00\x00\x00\xf0?\x00\x00\x00\x00\x00\x00\xf0?\x00\x00\x00\x00\x00\x00\xf0?&\xbfX\xf2\x8b%\xef?\xb8\x1e\x85\xebQ\xb8\xee?)\\\x8f\xc2\xf5(\xec?\x9a\x99\x99\x99\x99\x99\xe9?0\x96\xfcb\xc9/\xe6?\xc6\x92_,\xf9\xc5\xe2?\x03\x9d6\xd0i\x03\xdd?\xecQ\xb8\x1e\x85\xeb\xd1?\x9a\x99\x99\x99\x99\x99\xc9?{\x14\xaeG\xe1z\xc4?\xc6\x92_,\xf9\xc5\xc2?\xc6\x92_,\xf9\xc5\xc2?\xc6\x92_,\xf9\xc5\xc2?\x11\x11\x11\x11\x11\x11\xc1?\xb8\x1e\x85\xebQ\xb8\xbe?\xe5\x17K~\xb1\xe4\xb7?{\x14\xaeG\xe1z\xb4?{\x14\xaeG\xe1z\xb4?{\x14\xaeG\xe1z\xb4?{\x14\xaeG\xe1z\xb4?{\x14\xaeG\xe1z\xb4?{\x14\xaeG\xe1z\xb4?{\x14\xaeG\xe1z\xb4?\x00\x00\x00\x00\x00\x00\xf0?\x00\x00\x00\x00\x00\x00\xf0?\x00\x00\x00\x00\x00\x00\xf0?\x00\x00\x00\x00\x00\x00\xf0?\x93_,\xf9\xc5\x92\xef?\xde\xdd\xdd\xdd\xdd\xdd\xed?\xde\xdd\xdd\xdd\xdd\xdd\xed?\xbc\xbb\xbb\xbb\xbb\xbb\xeb?\xe1z\x14\xaeG\xe1\xea?\x07:m\xa0\xd3\x06\xea?\x9a\x99\x99\x99\x99\x99\xe9?wwwwww\xe7?{\x14\xaeG\xe1z\xe4?~\xb1\xe4\x17K~\xe1?\xde\xdd\xdd\xdd\xdd\xdd\xdd?\x9a\x99\x99\x99\x99\x99\xd9?\n\xd7\xa3p=\n\xd7?0\x96\xfcb\xc9/\xd6?\xc6\x92_,\xf9\xc5\xd2?\xb8\x1e\x85\xebQ\xb8\xce?O\x1b\xe8\xb4\x81N\xcb?\x9a\x99\x99\x99\x99\x99\xc9?0\x96\xfcb\xc9/\xc6?0\x96\xfcb\xc9/\xc6?{\x14\xaeG\xe1z\xc4?\xc6\x92_,\xf9\xc5\xc2?\xc6\x92_,\xf9\xc5\xc2?\x00\x00\x00\x00\x00\x00\xf0?\x00\x00\x00\x00\x00\x00\xf0?\x00\x00\x00\x00\x00\x00\xf0?\x00\x00\x00\x00\x00\x00\xf0?\x00\x00\x00\x00\x00\x00\xf0?\x00\x00\x00\x00\x00\x00\xf0?\x00\x00\x00\x00\x00\x00\xf0?\x00\x00\x00\x00\x00\x00\xf0?\x93_,\xf9\xc5\x92\xef?\x93_,\xf9\xc5\x92\xef?\x93_,\xf9\xc5\x92\xef?&\xbfX\xf2\x8b%\xef?&\xbfX\xf2\x8b%\xef?&\xbfX\xf2\x8b%\xef?&\xbfX\xf2\x8b%\xef?\xb8\x1e\x85\xebQ\xb8\xee?\xb8\x1e\x85\xebQ\xb8\xee?\xb8\x1e\x85\xebQ\xb8\xee?\xb8\x1e\x85\xebQ\xb8\xee?\xb8\x1e\x85\xebQ\xb8\xee?\xb8\x1e\x85\xebQ\xb8\xee?\xb8\x1e\x85\xebQ\xb8\xee?\xb8\x1e\x85\xebQ\xb8\xee?\xb8\x1e\x85\xebQ\xb8\xee?\xb8\x1e\x85\xebQ\xb8\xee?\xb8\x1e\x85\xebQ\xb8\xee?\xb8\x1e\x85\xebQ\xb8\xee?\x00\x00\x00\x00\x00\x00\xf0?\x00\x00\x00\x00\x00\x00\xf0?\x00\x00\x00\x00\x00\x00\xf0?\x00\x00\x00\x00\x00\x00\xf0?\x00\x00\x00\x00\x00\x00\xf0?\x00\x00\x00\x00\x00\x00\xf0?\x93_,\xf9\xc5\x92\xef?\x93_,\xf9\xc5\x92\xef?\x93_,\xf9\xc5\x92\xef?\x93_,\xf9\xc5\x92\xef?\x93_,\xf9\xc5\x92\xef?&\xbfX\xf2\x8b%\xef?\xb8\x1e\x85\xebQ\xb8\xee?\xb8\x1e\x85\xebQ\xb8\xee?\xb8\x1e\x85\xebQ\xb8\xee?\xb8\x1e\x85\xebQ\xb8\xee?\xb8\x1e\x85\xebQ\xb8\xee?\xb8\x1e\x85\xebQ\xb8\xee?\xb8\x1e\x85\xebQ\xb8\xee?\xb8\x1e\x85\xebQ\xb8\xee?\xb8\x1e\x85\xebQ\xb8\xee?\xb8\x1e\x85\xebQ\xb8\xee?&\xbfX\xf2\x8b%\xef?&\xbfX\xf2\x8b%\xef?&\xbfX\xf2\x8b%\xef?&\xbfX\xf2\x8b%\xef?&\xbfX\xf2\x8b%\xef?\x00\x00\x00\x00\x00\x00\xf0?\x00\x00\x00\x00\x00\x00\xf0?\x00\x00\x00\x00\x00\x00\xf0?\x00\x00\x00\x00\x00\x00\xf0?\x00\x00\x00\x00\x00\x00\xf0?\x00\x00\x00\x00\x00\x00\xf0?\x00\x00\x00\x00\x00\x00\xf0?\x00\x00\x00\x00\x00\x00\xf0?\x00\x00\x00\x00\x00\x00\xf0?\x00\x00\x00\x00\x00\x00\xf0?\x00\x00\x00\x00\x00\x00\xf0?\x00\x00\x00\x00\x00\x00\xf0?\x00\x00\x00\x00\x00\x00\xf0?\x00\x00\x00\x00\x00\x00\xf0?\x00\x00\x00\x00\x00\x00\xf0?\x00\x00\x00\x00\x00\x00\xf0?\x00\x00\x00\x00\x00\x00\xf0?\x00\x00\x00\x00\x00\x00\xf0?\x00\x00\x00\x00\x00\x00\xf0?\x00\x00\x00\x00\x00\x00\xf0?\x00\x00\x00\x00\x00\x00\xf0?\x00\x00\x00\x00\x00\x00\xf0?\x00\x00\x00\x00\x00\x00\xf0?\x00\x00\x00\x00\x00\x00\xf0?\x00\x00\x00\x00\x00\x00\xf0?\x00\x00\x00\x00\x00\x00\xf0?\x00\x00\x00\x00\x00\x00\xf0?\x00\x00\x00\x00\x00\x00\xf0?\x00\x00\x00\x00\x00\x00\xf0?\x00\x00\x00\x00\x00\x00\xf0?\x00\x00\x00\x00\x00\x00\xf0?\x00\x00\x00\x00\x00\x00\xf0?\x00\x00\x00\x00\x00\x00\xf0?\x00\x00\x00\x00\x00\x00\xf0?\x00\x00\x00\x00\x00\x00\xf0?\x00\x00\x00\x00\x00\x00\xf0?\x00\x00\x00\x00\x00\x00\xf0?\x93_,\xf9\xc5\x92\xef?&\xbfX\xf2\x8b%\xef?\xb8\x1e\x85\xebQ\xb8\xee?K~\xb1\xe4\x17K\xee?K~\xb1\xe4\x17K\xee?K~\xb1\xe4\x17K\xee?K~\xb1\xe4\x17K\xee?K~\xb1\xe4\x17K\xee?K~\xb1\xe4\x17K\xee?K~\xb1\xe4\x17K\xee?K~\xb1\xe4\x17K\xee?K~\xb1\xe4\x17K\xee?K~\xb1\xe4\x17K\xee?K~\xb1\xe4\x17K\xee?\xde\xdd\xdd\xdd\xdd\xdd\xed?\xde\xdd\xdd\xdd\xdd\xdd\xed?\xde\xdd\xdd\xdd\xdd\xdd\xed?\x00\x00\x00\x00\x00\x00\xf0?\x00\x00\x00\x00\x00\x00\xf0?\x00\x00\x00\x00\x00\x00\xf0?\x00\x00\x00\x00\x00\x00\xf0?\x00\x00\x00\x00\x00\x00\xf0?\x00\x00\x00\x00\x00\x00\xf0?\x93_,\xf9\xc5\x92\xef?\x93_,\xf9\xc5\x92\xef?&\xbfX\xf2\x8b%\xef?&\xbfX\xf2\x8b%\xef?&\xbfX\xf2\x8b%\xef?\xb8\x1e\x85\xebQ\xb8\xee?\xb8\x1e\x85\xebQ\xb8\xee?\xb8\x1e\x85\xebQ\xb8\xee?\xb8\x1e\x85\xebQ\xb8\xee?K~\xb1\xe4\x17K\xee?K~\xb1\xe4\x17K\xee?\xde\xdd\xdd\xdd\xdd\xdd\xed?\xde\xdd\xdd\xdd\xdd\xdd\xed?q=\n\xd7\xa3p\xed?q=\n\xd7\xa3p\xed?\x03\x9d6\xd0i\x03\xed?\x03\x9d6\xd0i\x03\xed?\x03\x9d6\xd0i\x03\xed?\x03\x9d6\xd0i\x03\xed?\x96\xfcb\xc9/\x96\xec?\x96\xfcb\xc9/\x96\xec?\x00\x00\x00\x00\x00\x00\xf0?\x00\x00\x00\x00\x00\x00\xf0?\x00\x00\x00\x00\x00\x00\xf0?\x00\x00\x00\x00\x00\x00\xf0?\x93_,\xf9\xc5\x92\xef?\x93_,\xf9\xc5\x92\xef?&\xbfX\xf2\x8b%\xef?K~\xb1\xe4\x17K\xee?\xde\xdd\xdd\xdd\xdd\xdd\xed?\xde\xdd\xdd\xdd\xdd\xdd\xed?\xde\xdd\xdd\xdd\xdd\xdd\xed?q=\n\xd7\xa3p\xed?\x03\x9d6\xd0i\x03\xed?\x03\x9d6\xd0i\x03\xed?\x96\xfcb\xc9/\x96\xec?\x96\xfcb\xc9/\x96\xec?\x96\xfcb\xc9/\x96\xec?\x96\xfcb\xc9/\x96\xec?\x96\xfcb\xc9/\x96\xec?\x96\xfcb\xc9/\x96\xec?\x96\xfcb\xc9/\x96\xec?\x96\xfcb\xc9/\x96\xec?\x96\xfcb\xc9/\x96\xec?\x96\xfcb\xc9/\x96\xec?\xbc\xbb\xbb\xbb\xbb\xbb\xeb?\xe1z\x14\xaeG\xe1\xea?\xe1z\x14\xaeG\xe1\xea?\x00\x00\x00\x00\x00\x00\xf0?\x00\x00\x00\x00\x00\x00\xf0?\xb8\x1e\x85\xebQ\xb8\xee?\x96\xfcb\xc9/\x96\xec?)\\\x8f\xc2\xf5(\xec?\xbfX\xf2\x8b%\xbf\xe8?\xe8\xb4\x81N\x1b\xe8\xe4?Y\xf2\x8b%\xbfX\xe2?7\xd0i\x03\x9d6\xe0?O\x1b\xe8\xb4\x81N\xdb?0\x96\xfcb\xc9/\xd6?\x11\x11\x11\x11\x11\x11\xd1?\x03\x9d6\xd0i\x03\xcd?\x03\x9d6\xd0i\x03\xcd?O\x1b\xe8\xb4\x81N\xcb?\x9a\x99\x99\x99\x99\x99\xc9?\xe5\x17K~\xb1\xe4\xc7?\xe5\x17K~\xb1\xe4\xc7?0\x96\xfcb\xc9/\xc6?0\x96\xfcb\xc9/\xc6?0\x96\xfcb\xc9/\xc6?0\x96\xfcb\xc9/\xc6?0\x96\xfcb\xc9/\xc6?{\x14\xaeG\xe1z\xc4?{\x14\xaeG\xe1z\xc4?\xc6\x92_,\xf9\xc5\xc2?\xc6\x92_,\xf9\xc5\xc2?\x00\x00\x00\x00\x00\x00\xf0?\x00\x00\x00\x00\x00\x00\xf0?\x00\x00\x00\x00\x00\x00\xf0?&\xbfX\xf2\x8b%\xef?\xde\xdd\xdd\xdd\xdd\xdd\xed?\x03\x9d6\xd0i\x03\xed?O\x1b\xe8\xb4\x81N\xeb?\x9a\x99\x99\x99\x99\x99\xe9?\xbfX\xf2\x8b%\xbf\xe8?R\xb8\x1e\x85\xebQ\xe8?UUUUUU\xe5?\xa0\xd3\x06:m\xa0\xe3?\xecQ\xb8\x1e\x85\xeb\xe1?\x11\x11\x11\x11\x11\x11\xe1?\x11\x11\x11\x11\x11\x11\xe1?\xb8\x1e\x85\xebQ\xb8\xde?\x03\x9d6\xd0i\x03\xdd?\xe5\x17K~\xb1\xe4\xd7?0\x96\xfcb\xc9/\xd6?{\x14\xaeG\xe1z\xd4?\xa0\xd3\x06:m\xa0\xd3?\xa0\xd3\x06:m\xa0\xd3?\xc6\x92_,\xf9\xc5\xd2?\x11\x11\x11\x11\x11\x11\xd1?\x11\x11\x11\x11\x11\x11\xd1?\x11\x11\x11\x11\x11\x11\xd1?7\xd0i\x03\x9d6\xd0?\x00\x00\x00\x00\x00\x00\xf0?\x00\x00\x00\x00\x00\x00\xf0?\x93_,\xf9\xc5\x92\xef?K~\xb1\xe4\x17K\xee?\x03\x9d6\xd0i\x03\xed?)\\\x8f\xc2\xf5(\xec?t\xda@\xa7\rt\xea?UUUUUU\xe5?Y\xf2\x8b%\xbfX\xe2?\xb8\x1e\x85\xebQ\xb8\xde?\x9a\x99\x99\x99\x99\x99\xd9?0\x96\xfcb\xc9/\xd6?\xc6\x92_,\xf9\xc5\xd2?\x11\x11\x11\x11\x11\x11\xd1?O\x1b\xe8\xb4\x81N\xcb?\xe5\x17K~\xb1\xe4\xc7?0\x96\xfcb\xc9/\xc6?0\x96\xfcb\xc9/\xc6?{\x14\xaeG\xe1z\xc4?O\x1b\xe8\xb4\x81N\xbb?\xe5\x17K~\xb1\xe4\xb7?\xe5\x17K~\xb1\xe4\xb7?\xe5\x17K~\xb1\xe4\xb7?\xe5\x17K~\xb1\xe4\xb7?\xe5\x17K~\xb1\xe4\xb7?\xe5\x17K~\xb1\xe4\xb7?{\x14\xaeG\xe1z\xb4?\x00\x00\x00\x00\x00\x00\xf0?\x93_,\xf9\xc5\x92\xef?K~\xb1\xe4\x17K\xee?O\x1b\xe8\xb4\x81N\xeb?{\x14\xaeG\xe1z\xe4?\xb8\x1e\x85\xebQ\xb8\xde?\xbfX\xf2\x8b%\xbf\xd8?7\xd0i\x03\x9d6\xd0?\xe5\x17K~\xb1\xe4\xc7?\xb8\x1e\x85\xebQ\xb8\xbe?\xe5\x17K~\xb1\xe4\xb7?\xe5\x17K~\xb1\xe4\xb7?\xe5\x17K~\xb1\xe4\xb7?{\x14\xaeG\xe1z\xb4?{\x14\xaeG\xe1z\xb4?{\x14\xaeG\xe1z\xb4?{\x14\xaeG\xe1z\xb4?{\x14\xaeG\xe1z\xb4?{\x14\xaeG\xe1z\xb4?{\x14\xaeG\xe1z\xb4?{\x14\xaeG\xe1z\xb4?{\x14\xaeG\xe1z\xb4?{\x14\xaeG\xe1z\xb4?{\x14\xaeG\xe1z\xb4?{\x14\xaeG\xe1z\xb4?{\x14\xaeG\xe1z\xb4?{\x14\xaeG\xe1z\xb4?\x00\x00\x00\x00\x00\x00\xf0?\x00\x00\x00\x00\x00\x00\xf0?&\xbfX\xf2\x8b%\xef?\xde\xdd\xdd\xdd\xdd\xdd\xed?\xbc\xbb\xbb\xbb\xbb\xbb\xeb?UUUUUU\xe5?~\xb1\xe4\x17K~\xe1?O\x1b\xe8\xb4\x81N\xdb?\xe5\x17K~\xb1\xe4\xd7?\xecQ\xb8\x1e\x85\xeb\xd1?\x9a\x99\x99\x99\x99\x99\xc9?0\x96\xfcb\xc9/\xc6?\xb8\x1e\x85\xebQ\xb8\xbe?\xb8\x1e\x85\xebQ\xb8\xbe?O\x1b\xe8\xb4\x81N\xbb?{\x14\xaeG\xe1z\xb4?{\x14\xaeG\xe1z\xb4?{\x14\xaeG\xe1z\xb4?{\x14\xaeG\xe1z\xb4?{\x14\xaeG\xe1z\xb4?{\x14\xaeG\xe1z\xb4?{\x14\xaeG\xe1z\xb4?{\x14\xaeG\xe1z\xb4?{\x14\xaeG\xe1z\xb4?{\x14\xaeG\xe1z\xb4?{\x14\xaeG\xe1z\xb4?{\x14\xaeG\xe1z\xb4?\x00\x00\x00\x00\x00\x00\xf0?\x93_,\xf9\xc5\x92\xef?\xde\xdd\xdd\xdd\xdd\xdd\xed?\x07:m\xa0\xd3\x06\xea?333333\xe3?\xde\xdd\xdd\xdd\xdd\xdd\xdd?UUUUUU\xd5?\x03\x9d6\xd0i\x03\xcd?\x11\x11\x11\x11\x11\x11\xc1?\xb8\x1e\x85\xebQ\xb8\xbe?\xb8\x1e\x85\xebQ\xb8\xbe?\xe5\x17K~\xb1\xe4\xb7?{\x14\xaeG\xe1z\xb4?{\x14\xaeG\xe1z\xb4?{\x14\xaeG\xe1z\xb4?{\x14\xaeG\xe1z\xb4?{\x14\xaeG\xe1z\xb4?{\x14\xaeG\xe1z\xb4?{\x14\xaeG\xe1z\xb4?{\x14\xaeG\xe1z\xb4?{\x14\xaeG\xe1z\xb4?{\x14\xaeG\xe1z\xb4?{\x14\xaeG\xe1z\xb4?{\x14\xaeG\xe1z\xb4?{\x14\xaeG\xe1z\xb4?{\x14\xaeG\xe1z\xb4?\x00\x00\x00\x00\x00\x00\x00\x00\x00\x00\x00\x00\x00\x00\xf0?\x93_,\xf9\xc5\x92\xef?K~\xb1\xe4\x17K\xee?q=\n\xd7\xa3p\xed?\x9a\x99\x99\x99\x99\x99\xe9?0\x96\xfcb\xc9/\xe6?\xa4p=\n\xd7\xa3\xe0?O\x1b\xe8\xb4\x81N\xdb?UUUUUU\xd5?7\xd0i\x03\x9d6\xd0?\x03\x9d6\xd0i\x03\xcd?O\x1b\xe8\xb4\x81N\xcb?{\x14\xaeG\xe1z\xc4?\xc6\x92_,\xf9\xc5\xc2?\x11\x11\x11\x11\x11\x11\xc1?O\x1b\xe8\xb4\x81N\xbb?O\x1b\xe8\xb4\x81N\xbb?O\x1b\xe8\xb4\x81N\xbb?O\x1b\xe8\xb4\x81N\xbb?O\x1b\xe8\xb4\x81N\xbb?O\x1b\xe8\xb4\x81N\xbb?O\x1b\xe8\xb4\x81N\xbb?\xe5\x17K~\xb1\xe4\xb7?\xe5\x17K~\xb1\xe4\xb7?\xe5\x17K~\xb1\xe4\xb7?\xe5\x17K~\xb1\xe4\xb7?\xe5\x17K~\xb1\xe4\xb7?\x00\x00\x00\x00\x00\x00\xf0?\x00\x00\x00\x00\x00\x00\xf0?\x00\x00\x00\x00\x00\x00\xf0?\x00\x00\x00\x00\x00\x00\xf0?\x00\x00\x00\x00\x00\x00\xf0?\x00\x00\x00\x00\x00\x00\xf0?\x00\x00\x00\x00\x00\x00\xf0?\x00\x00\x00\x00\x00\x00\xf0?\x00\x00\x00\x00\x00\x00\xf0?\x00\x00\x00\x00\x00\x00\xf0?\x00\x00\x00\x00\x00\x00\xf0?\x00\x00\x00\x00\x00\x00\xf0?\x00\x00\x00\x00\x00\x00\xf0?\x00\x00\x00\x00\x00\x00\xf0?\x00\x00\x00\x00\x00\x00\xf0?\x00\x00\x00\x00\x00\x00\xf0?\x00\x00\x00\x00\x00\x00\xf0?\x00\x00\x00\x00\x00\x00\xf0?\x00\x00\x00\x00\x00\x00\xf0?\x00\x00\x00\x00\x00\x00\xf0?\x00\x00\x00\x00\x00\x00\xf0?\x00\x00\x00\x00\x00\x00\xf0?\x00\x00\x00\x00\x00\x00\xf0?\x00\x00\x00\x00\x00\x00\xf0?\x00\x00\x00\x00\x00\x00\xf0?\x00\x00\x00\x00\x00\x00\xf0?\x00\x00\x00\x00\x00\x00\xf0?\x00\x00\x00\x00\x00\x00\xf0?\x00\x00\x00\x00\x00\x00\xf0?\x00\x00\x00\x00\x00\x00\xf0?\x00\x00\x00\x00\x00\x00\xf0?\x00\x00\x00\x00\x00\x00\xf0?\x00\x00\x00\x00\x00\x00\xf0?\x00\x00\x00\x00\x00\x00\xf0?\x00\x00\x00\x00\x00\x00\xf0?\x00\x00\x00\x00\x00\x00\xf0?\x00\x00\x00\x00\x00\x00\xf0?\x00\x00\x00\x00\x00\x00\xf0?\x00\x00\x00\x00\x00\x00\xf0?\x00\x00\x00\x00\x00\x00\xf0?\x00\x00\x00\x00\x00\x00\xf0?\x00\x00\x00\x00\x00\x00\xf0?\x00\x00\x00\x00\x00\x00\xf0?\x00\x00\x00\x00\x00\x00\xf0?\x00\x00\x00\x00\x00\x00\xf0?\x00\x00\x00\x00\x00\x00\xf0?\x00\x00\x00\x00\x00\x00\xf0?\x00\x00\x00\x00\x00\x00\xf0?\x00\x00\x00\x00\x00\x00\xf0?\x00\x00\x00\x00\x00\x00\xf0?\x00\x00\x00\x00\x00\x00\xf0?\x00\x00\x00\x00\x00\x00\xf0?\x00\x00\x00\x00\x00\x00\xf0?\x00\x00\x00\x00\x00\x00\xf0?\x00\x00\x00\x00\x00\x00\xf0?\x00\x00\x00\x00\x00\x00\xf0?\x00\x00\x00\x00\x00\x00\xf0?\x00\x00\x00\x00\x00\x00\xf0?\x00\x00\x00\x00\x00\x00\xf0?\x00\x00\x00\x00\x00\x00\xf0?\x00\x00\x00\x00\x00\x00\xf0?\x00\x00\x00\x00\x00\x00\xf0?\x00\x00\x00\x00\x00\x00\xf0?\x00\x00\x00\x00\x00\x00\xf0?\x00\x00\x00\x00\x00\x00\xf0?\x00\x00\x00\x00\x00\x00\xf0?\x00\x00\x00\x00\x00\x00\xf0?\x00\x00\x00\x00\x00\x00\xf0?\x00\x00\x00\x00\x00\x00\xf0?\x00\x00\x00\x00\x00\x00\xf0?\x00\x00\x00\x00\x00\x00\xf0?\x00\x00\x00\x00\x00\x00\xf0?\x00\x00\x00\x00\x00\x00\xf0?\x00\x00\x00\x00\x00\x00\xf0?\x00\x00\x00\x00\x00\x00\xf0?\x00\x00\x00\x00\x00\x00\xf0?\x00\x00\x00\x00\x00\x00\xf0?\x00\x00\x00\x00\x00\x00\xf0?\x00\x00\x00\x00\x00\x00\xf0?\x00\x00\x00\x00\x00\x00\xf0?\x00\x00\x00\x00\x00\x00\xf0?\x00\x00\x00\x00\x00\x00\xf0?\x00\x00\x00\x00\x00\x00\xf0?\x00\x00\x00\x00\x00\x00\xf0?\x00\x00\x00\x00\x00\x00\xf0?\x00\x00\x00\x00\x00\x00\xf0?\x00\x00\x00\x00\x00\x00\xf0?\x00\x00\x00\x00\x00\x00\xf0?\x00\x00\x00\x00\x00\x00\xf0?\x00\x00\x00\x00\x00\x00\xf0?\x00\x00\x00\x00\x00\x00\xf0?\x00\x00\x00\x00\x00\x00\xf0?\x00\x00\x00\x00\x00\x00\xf0?\x00\x00\x00\x00\x00\x00\xf0?\x00\x00\x00\x00\x00\x00\xf0?\x00\x00\x00\x00\x00\x00\xf0?\x00\x00\x00\x00\x00\x00\xf0?\x00\x00\x00\x00\x00\x00\xf0?\x00\x00\x00\x00\x00\x00\xf0?\x00\x00\x00\x00\x00\x00\xf0?\x00\x00\x00\x00\x00\x00\xf0?\x00\x00\x00\x00\x00\x00\xf0?\x00\x00\x00\x00\x00\x00\xf0?\x00\x00\x00\x00\x00\x00\xf0?\x00\x00\x00\x00\x00\x00\xf0?\x00\x00\x00\x00\x00\x00\xf0?\x00\x00\x00\x00\x00\x00\xf0?\x00\x00\x00\x00\x00\x00\xf0?\x00\x00\x00\x00\x00\x00\xf0?\x00\x00\x00\x00\x00\x00\xf0?\x00\x00\x00\x00\x00\x00\xf0?\x00\x00\x00\x00\x00\x00\xf0?\x00\x00\x00\x00\x00\x00\xf0?\x00\x00\x00\x00\x00\x00\xf0?\x00\x00\x00\x00\x00\x00\xf0?\x00\x00\x00\x00\x00\x00\xf0?\x00\x00\x00\x00\x00\x00\xf0?\x00\x00\x00\x00\x00\x00\xf0?\x00\x00\x00\x00\x00\x00\xf0?\x00\x00\x00\x00\x00\x00\xf0?\x00\x00\x00\x00\x00\x00\xf0?\x00\x00\x00\x00\x00\x00\xf0?\x00\x00\x00\x00\x00\x00\xf0?\x00\x00\x00\x00\x00\x00\xf0?\x00\x00\x00\x00\x00\x00\xf0?\x00\x00\x00\x00\x00\x00\xf0?\x00\x00\x00\x00\x00\x00\xf0?\x00\x00\x00\x00\x00\x00\xf0?\x00\x00\x00\x00\x00\x00\xf0?\x00\x00\x00\x00\x00\x00\xf0?\x00\x00\x00\x00\x00\x00\xf0?\x00\x00\x00\x00\x00\x00\xf0?\x00\x00\x00\x00\x00\x00\xf0?\x00\x00\x00\x00\x00\x00\xf0?\x00\x00\x00\x00\x00\x00\xf0?\x00\x00\x00\x00\x00\x00\xf0?\x00\x00\x00\x00\x00\x00\xf0?\x00\x00\x00\x00\x00\x00\xf0?\x00\x00\x00\x00\x00\x00\xf0?\x00\x00\x00\x00\x00\x00\xf0?\x00\x00\x00\x00\x00\x00\xf0?\x00\x00\x00\x00\x00\x00\xf0?\x00\x00\x00\x00\x00\x00\xf0?\x00\x00\x00\x00\x00\x00\xf0?\x00\x00\x00\x00\x00\x00\xf0?\x00\x00\x00\x00\x00\x00\xf0?\x00\x00\x00\x00\x00\x00\xf0?\x00\x00\x00\x00\x00\x00\xf0?\x00\x00\x00\x00\x00\x00\xf0?\x00\x00\x00\x00\x00\x00\xf0?\x00\x00\x00\x00\x00\x00\xf0?\x00\x00\x00\x00\x00\x00\xf0?\x00\x00\x00\x00\x00\x00\xf0?\x00\x00\x00\x00\x00\x00\xf0?\x00\x00\x00\x00\x00\x00\xf0?\x00\x00\x00\x00\x00\x00\xf0?\x00\x00\x00\x00\x00\x00\xf0?\x00\x00\x00\x00\x00\x00\xf0?\x00\x00\x00\x00\x00\x00\xf0?\x00\x00\x00\x00\x00\x00\xf0?\x00\x00\x00\x00\x00\x00\xf0?\x00\x00\x00\x00\x00\x00\xf0?\x00\x00\x00\x00\x00\x00\xf0?\x00\x00\x00\x00\x00\x00\xf0?\x00\x00\x00\x00\x00\x00\xf0?\x00\x00\x00\x00\x00\x00\xf0?\x00\x00\x00\x00\x00\x00\xf0?\x00\x00\x00\x00\x00\x00\xf0?\x00\x00\x00\x00\x00\x00\xf0?\x00\x00\x00\x00\x00\x00\xf0?\x00\x00\x00\x00\x00\x00\xf0?\x00\x00\x00\x00\x00\x00\xf0?\x00\x00\x00\x00\x00\x00\xf0?\x00\x00\x00\x00\x00\x00\xf0?\x00\x00\x00\x00\x00\x00\xf0?\x93_,\xf9\xc5\x92\xef?\x93_,\xf9\xc5\x92\xef?\x00\x00\x00\x00\x00\x00\xf0?\x00\x00\x00\x00\x00\x00\xf0?\x00\x00\x00\x00\x00\x00\xf0?\x00\x00\x00\x00\x00\x00\xf0?\x00\x00\x00\x00\x00\x00\xf0?\x00\x00\x00\x00\x00\x00\xf0?\x00\x00\x00\x00\x00\x00\xf0?\x00\x00\x00\x00\x00\x00\xf0?\x00\x00\x00\x00\x00\x00\xf0?\x00\x00\x00\x00\x00\x00\xf0?\x00\x00\x00\x00\x00\x00\xf0?\x00\x00\x00\x00\x00\x00\xf0?\x00\x00\x00\x00\x00\x00\xf0?\x00\x00\x00\x00\x00\x00\xf0?\x00\x00\x00\x00\x00\x00\xf0?\x00\x00\x00\x00\x00\x00\xf0?\x00\x00\x00\x00\x00\x00\xf0?\x00\x00\x00\x00\x00\x00\xf0?\x00\x00\x00\x00\x00\x00\xf0?\x00\x00\x00\x00\x00\x00\xf0?\x00\x00\x00\x00\x00\x00\xf0?\x00\x00\x00\x00\x00\x00\xf0?\x00\x00\x00\x00\x00\x00\xf0?\x00\x00\x00\x00\x00\x00\xf0?\x00\x00\x00\x00\x00\x00\xf0?\x00\x00\x00\x00\x00\x00\xf0?\x00\x00\x00\x00\x00\x00\xf0?\x00\x00\x00\x00\x00\x00\xf0?\x00\x00\x00\x00\x00\x00\xf0?\x00\x00\x00\x00\x00\x00\xf0?\x00\x00\x00\x00\x00\x00\xf0?\x00\x00\x00\x00\x00\x00\xf0?\x00\x00\x00\x00\x00\x00\xf0?\x00\x00\x00\x00\x00\x00\xf0?\x00\x00\x00\x00\x00\x00\xf0?\x00\x00\x00\x00\x00\x00\xf0?\x00\x00\x00\x00\x00\x00\xf0?\x00\x00\x00\x00\x00\x00\xf0?\x00\x00\x00\x00\x00\x00\xf0?\x00\x00\x00\x00\x00\x00\xf0?\x00\x00\x00\x00\x00\x00\xf0?\x00\x00\x00\x00\x00\x00\xf0?\x00\x00\x00\x00\x00\x00\xf0?\x00\x00\x00\x00\x00\x00\xf0?\x00\x00\x00\x00\x00\x00\xf0?\x00\x00\x00\x00\x00\x00\xf0?\x00\x00\x00\x00\x00\x00\xf0?\x00\x00\x00\x00\x00\x00\xf0?\x00\x00\x00\x00\x00\x00\xf0?\x00\x00\x00\x00\x00\x00\xf0?\x93_,\xf9\xc5\x92\xef?&\xbfX\xf2\x8b%\xef?K~\xb1\xe4\x17K\xee?q=\n\xd7\xa3p\xed?)\\\x8f\xc2\xf5(\xec?\xe1z\x14\xaeG\xe1\xea?\xe1z\x14\xaeG\xe1\xea?\x07:m\xa0\xd3\x06\xea?\x9a\x99\x99\x99\x99\x99\xe9?\x9a\x99\x99\x99\x99\x99\xe9?,\xf9\xc5\x92_,\xe9?\xbfX\xf2\x8b%\xbf\xe8?R\xb8\x1e\x85\xebQ\xe8?\xe5\x17K~\xb1\xe4\xe7?\n\xd7\xa3p=\n\xe7?\x9d6\xd0i\x03\x9d\xe6?\x00\x00\x00\x00\x00\x00\xf0?\x00\x00\x00\x00\x00\x00\xf0?\x00\x00\x00\x00\x00\x00\xf0?\x00\x00\x00\x00\x00\x00\xf0?\x00\x00\x00\x00\x00\x00\xf0?\x93_,\xf9\xc5\x92\xef?\x93_,\xf9\xc5\x92\xef?q=\n\xd7\xa3p\xed?O\x1b\xe8\xb4\x81N\xeb?,\xf9\xc5\x92_,\xe9?333333\xe3?\x93_,\xf9\xc5\x92\xdf?\x9a\x99\x99\x99\x99\x99\xd9?\xc6\x92_,\xf9\xc5\xd2?7\xd0i\x03\x9d6\xd0?\x03\x9d6\xd0i\x03\xcd?O\x1b\xe8\xb4\x81N\xcb?\x9a\x99\x99\x99\x99\x99\xc9?\xe5\x17K~\xb1\xe4\xc7?\x9a\x99\x99\x99\x99\x99\xc9?\x9a\x99\x99\x99\x99\x99\xc9?0\x96\xfcb\xc9/\xc6?0\x96\xfcb\xc9/\xc6?{\x14\xaeG\xe1z\xc4?\xc6\x92_,\xf9\xc5\xc2?\xc6\x92_,\xf9\xc5\xc2?\xc6\x92_,\xf9\xc5\xc2?\x00\x00\x00\x00\x00\x00\xf0?\x00\x00\x00\x00\x00\x00\xf0?\x00\x00\x00\x00\x00\x00\xf0?\x00\x00\x00\x00\x00\x00\xf0?\x00\x00\x00\x00\x00\x00\xf0?\x93_,\xf9\xc5\x92\xef?K~\xb1\xe4\x17K\xee?\x96\xfcb\xc9/\x96\xec?\xbc\xbb\xbb\xbb\xbb\xbb\xeb?\x9a\x99\x99\x99\x99\x99\xe9?{\x14\xaeG\xe1z\xe4?333333\xe3?\x93_,\xf9\xc5\x92\xdf?\n\xd7\xa3p=\n\xd7?\x11\x11\x11\x11\x11\x11\xd1?\xb8\x1e\x85\xebQ\xb8\xce?\xe5\x17K~\xb1\xe4\xc7?0\x96\xfcb\xc9/\xc6?{\x14\xaeG\xe1z\xc4?\xb8\x1e\x85\xebQ\xb8\xbe?\xb8\x1e\x85\xebQ\xb8\xbe?\xb8\x1e\x85\xebQ\xb8\xbe?O\x1b\xe8\xb4\x81N\xbb?O\x1b\xe8\xb4\x81N\xbb?O\x1b\xe8\xb4\x81N\xbb?O\x1b\xe8\xb4\x81N\xbb?O\x1b\xe8\xb4\x81N\xbb?\x00\x00\x00\x00\x00\x00\xf0?\x00\x00\x00\x00\x00\x00\xf0?\x00\x00\x00\x00\x00\x00\xf0?\x00\x00\x00\x00\x00\x00\xf0?\x93_,\xf9\xc5\x92\xef?K~\xb1\xe4\x17K\xee?\x03\x9d6\xd0i\x03\xed?t\xda@\xa7\rt\xea?\xc3\xf5(\\\x8f\xc2\xe5?\xecQ\xb8\x1e\x85\xeb\xe1?)\\\x8f\xc2\xf5(\xdc?\xe5\x17K~\xb1\xe4\xd7?O\x1b\xe8\xb4\x81N\xcb?0\x96\xfcb\xc9/\xc6?\x11\x11\x11\x11\x11\x11\xc1?\x11\x11\x11\x11\x11\x11\xc1?\xb8\x1e\x85\xebQ\xb8\xbe?\xb8\x1e\x85\xebQ\xb8\xbe?O\x1b\xe8\xb4\x81N\xbb?\xe5\x17K~\xb1\xe4\xb7?\xe5\x17K~\xb1\xe4\xb7?\xe5\x17K~\xb1\xe4\xb7?\xe5\x17K~\xb1\xe4\xb7?{\x14\xaeG\xe1z\xb4?{\x14\xaeG\xe1z\xb4?{\x14\xaeG\xe1z\xb4?{\x14\xaeG\xe1z\xb4?\x00\x00\x00\x00\x00\x00\xf0?\x00\x00\x00\x00\x00\x00\xf0?\x00\x00\x00\x00\x00\x00\xf0?\x93_,\xf9\xc5\x92\xef?\x93_,\xf9\xc5\x92\xef?K~\xb1\xe4\x17K\xee?\x96\xfcb\xc9/\x96\xec?\x96\xfcb\xc9/\x96\xec?\x07:m\xa0\xd3\x06\xea?wwwwww\xe7?\xc3\xf5(\\\x8f\xc2\xe5?\xa0\xd3\x06:m\xa0\xe3?~\xb1\xe4\x17K~\xe1?)\\\x8f\xc2\xf5(\xdc?\n\xd7\xa3p=\n\xd7?\xa0\xd3\x06:m\xa0\xd3?7\xd0i\x03\x9d6\xd0?0\x96\xfcb\xc9/\xc6?{\x14\xaeG\xe1z\xc4?\x11\x11\x11\x11\x11\x11\xc1?\xb8\x1e\x85\xebQ\xb8\xbe?O\x1b\xe8\xb4\x81N\xbb?O\x1b\xe8\xb4\x81N\xbb?O\x1b\xe8\xb4\x81N\xbb?O\x1b\xe8\xb4\x81N\xbb?O\x1b\xe8\xb4\x81N\xbb?\xe5\x17K~\xb1\xe4\xb7?\x00\x00\x00\x00\x00\x00\xf0?\x00\x00\x00\x00\x00\x00\xf0?\x00\x00\x00\x00\x00\x00\xf0?\x00\x00\x00\x00\x00\x00\xf0?\x00\x00\x00\x00\x00\x00\xf0?\x00\x00\x00\x00\x00\x00\xf0?\x00\x00\x00\x00\x00\x00\xf0?\x00\x00\x00\x00\x00\x00\xf0?\x00\x00\x00\x00\x00\x00\xf0?\x00\x00\x00\x00\x00\x00\xf0?\x00\x00\x00\x00\x00\x00\xf0?\x00\x00\x00\x00\x00\x00\xf0?\x00\x00\x00\x00\x00\x00\xf0?\x00\x00\x00\x00\x00\x00\xf0?\x00\x00\x00\x00\x00\x00\xf0?\x00\x00\x00\x00\x00\x00\xf0?\x00\x00\x00\x00\x00\x00\xf0?\x00\x00\x00\x00\x00\x00\xf0?\x00\x00\x00\x00\x00\x00\xf0?\x00\x00\x00\x00\x00\x00\xf0?\x00\x00\x00\x00\x00\x00\xf0?\x00\x00\x00\x00\x00\x00\xf0?\x00\x00\x00\x00\x00\x00\xf0?\x00\x00\x00\x00\x00\x00\xf0?\x00\x00\x00\x00\x00\x00\xf0?\x00\x00\x00\x00\x00\x00\xf0?\x00\x00\x00\x00\x00\x00\xf0?\x00\x00\x00\x00\x00\x00\xf0?\x00\x00\x00\x00\x00\x00\xf0?\x00\x00\x00\x00\x00\x00\xf0?\x00\x00\x00\x00\x00\x00\xf0?\x00\x00\x00\x00\x00\x00\xf0?\x00\x00\x00\x00\x00\x00\xf0?\x00\x00\x00\x00\x00\x00\xf0?\x00\x00\x00\x00\x00\x00\xf0?\x00\x00\x00\x00\x00\x00\xf0?\x00\x00\x00\x00\x00\x00\xf0?\x00\x00\x00\x00\x00\x00\xf0?\x00\x00\x00\x00\x00\x00\xf0?\x00\x00\x00\x00\x00\x00\xf0?\x00\x00\x00\x00\x00\x00\xf0?\x00\x00\x00\x00\x00\x00\xf0?\x00\x00\x00\x00\x00\x00\xf0?\x00\x00\x00\x00\x00\x00\xf0?\x00\x00\x00\x00\x00\x00\xf0?\x00\x00\x00\x00\x00\x00\xf0?\x00\x00\x00\x00\x00\x00\xf0?\x00\x00\x00\x00\x00\x00\xf0?\x00\x00\x00\x00\x00\x00\xf0?\x00\x00\x00\x00\x00\x00\xf0?\x00\x00\x00\x00\x00\x00\xf0?\x00\x00\x00\x00\x00\x00\xf0?\x00\x00\x00\x00\x00\x00\xf0?\x00\x00\x00\x00\x00\x00\xf0?\x00\x00\x00\x00\x00\x00\xf0?\x00\x00\x00\x00\x00\x00\xf0?\x00\x00\x00\x00\x00\x00\xf0?\x00\x00\x00\x00\x00\x00\xf0?\x00\x00\x00\x00\x00\x00\xf0?\x00\x00\x00\x00\x00\x00\xf0?\x00\x00\x00\x00\x00\x00\xf0?\x00\x00\x00\x00\x00\x00\xf0?\x00\x00\x00\x00\x00\x00\xf0?\x00\x00\x00\x00\x00\x00\xf0?\x00\x00\x00\x00\x00\x00\xf0?\x00\x00\x00\x00\x00\x00\xf0?\x00\x00\x00\x00\x00\x00\xf0?\x00\x00\x00\x00\x00\x00\xf0?\x00\x00\x00\x00\x00\x00\xf0?\x00\x00\x00\x00\x00\x00\xf0?\x00\x00\x00\x00\x00\x00\xf0?\x00\x00\x00\x00\x00\x00\xf0?\x00\x00\x00\x00\x00\x00\xf0?\x00\x00\x00\x00\x00\x00\xf0?\x00\x00\x00\x00\x00\x00\xf0?\x00\x00\x00\x00\x00\x00\xf0?\x00\x00\x00\x00\x00\x00\xf0?\x00\x00\x00\x00\x00\x00\xf0?\x00\x00\x00\x00\x00\x00\xf0?\x00\x00\x00\x00\x00\x00\xf0?\x00\x00\x00\x00\x00\x00\xf0?\x00\x00\x00\x00\x00\x00\xf0?\x00\x00\x00\x00\x00\x00\xf0?\x00\x00\x00\x00\x00\x00\xf0?\x00\x00\x00\x00\x00\x00\xf0?\x00\x00\x00\x00\x00\x00\xf0?\x00\x00\x00\x00\x00\x00\xf0?\x00\x00\x00\x00\x00\x00\xf0?\x00\x00\x00\x00\x00\x00\xf0?\x00\x00\x00\x00\x00\x00\xf0?\x00\x00\x00\x00\x00\x00\xf0?\x00\x00\x00\x00\x00\x00\xf0?\x00\x00\x00\x00\x00\x00\xf0?\x00\x00\x00\x00\x00\x00\xf0?\x00\x00\x00\x00\x00\x00\xf0?\x00\x00\x00\x00\x00\x00\xf0?\x00\x00\x00\x00\x00\x00\xf0?\x00\x00\x00\x00\x00\x00\xf0?\x00\x00\x00\x00\x00\x00\xf0?\x00\x00\x00\x00\x00\x00\xf0?\x00\x00\x00\x00\x00\x00\xf0?\x00\x00\x00\x00\x00\x00\xf0?\x00\x00\x00\x00\x00\x00\xf0?\x00\x00\x00\x00\x00\x00\xf0?\x00\x00\x00\x00\x00\x00\xf0?\x00\x00\x00\x00\x00\x00\xf0?\x00\x00\x00\x00\x00\x00\xf0?\x00\x00\x00\x00\x00\x00\xf0?\x00\x00\x00\x00\x00\x00\xf0?\x00\x00\x00\x00\x00\x00\xf0?\x00\x00\x00\x00\x00\x00\xf0?\x00\x00\x00\x00\x00\x00\xf0?\x00\x00\x00\x00\x00\x00\xf0?\x00\x00\x00\x00\x00\x00\xf0?\x00\x00\x00\x00\x00\x00\xf0?\x00\x00\x00\x00\x00\x00\xf0?\x00\x00\x00\x00\x00\x00\xf0?\x00\x00\x00\x00\x00\x00\xf0?\x00\x00\x00\x00\x00\x00\xf0?\x00\x00\x00\x00\x00\x00\xf0?\x93_,\xf9\xc5\x92\xef?\x93_,\xf9\xc5\x92\xef?\x93_,\xf9\xc5\x92\xef?\x93_,\xf9\xc5\x92\xef?\x00\x00\x00\x00\x00\x00\xf0?\x00\x00\x00\x00\x00\x00\xf0?\x00\x00\x00\x00\x00\x00\xf0?\x00\x00\x00\x00\x00\x00\xf0?\x00\x00\x00\x00\x00\x00\xf0?\x00\x00\x00\x00\x00\x00\xf0?\x00\x00\x00\x00\x00\x00\xf0?\x00\x00\x00\x00\x00\x00\xf0?\x00\x00\x00\x00\x00\x00\xf0?\x00\x00\x00\x00\x00\x00\xf0?\x00\x00\x00\x00\x00\x00\xf0?\x00\x00\x00\x00\x00\x00\xf0?\x00\x00\x00\x00\x00\x00\xf0?\x00\x00\x00\x00\x00\x00\xf0?\x00\x00\x00\x00\x00\x00\xf0?\x00\x00\x00\x00\x00\x00\xf0?\x00\x00\x00\x00\x00\x00\xf0?\x00\x00\x00\x00\x00\x00\xf0?\x00\x00\x00\x00\x00\x00\xf0?\x00\x00\x00\x00\x00\x00\xf0?\x00\x00\x00\x00\x00\x00\xf0?\x00\x00\x00\x00\x00\x00\xf0?\x00\x00\x00\x00\x00\x00\xf0?\x00\x00\x00\x00\x00\x00\xf0?\x00\x00\x00\x00\x00\x00\xf0?\x00\x00\x00\x00\x00\x00\xf0?\x00\x00\x00\x00\x00\x00\xf0?\x00\x00\x00\x00\x00\x00\xf0?\x00\x00\x00\x00\x00\x00\xf0?\x00\x00\x00\x00\x00\x00\xf0?\x00\x00\x00\x00\x00\x00\xf0?\x00\x00\x00\x00\x00\x00\xf0?\x00\x00\x00\x00\x00\x00\xf0?\x00\x00\x00\x00\x00\x00\xf0?\x00\x00\x00\x00\x00\x00\xf0?\x00\x00\x00\x00\x00\x00\xf0?\x00\x00\x00\x00\x00\x00\xf0?\x00\x00\x00\x00\x00\x00\xf0?\x00\x00\x00\x00\x00\x00\xf0?\x00\x00\x00\x00\x00\x00\xf0?\x00\x00\x00\x00\x00\x00\xf0?\x00\x00\x00\x00\x00\x00\xf0?\x93_,\xf9\xc5\x92\xef?\x93_,\xf9\xc5\x92\xef?\x93_,\xf9\xc5\x92\xef?\x93_,\xf9\xc5\x92\xef?&\xbfX\xf2\x8b%\xef?&\xbfX\xf2\x8b%\xef?K~\xb1\xe4\x17K\xee?K~\xb1\xe4\x17K\xee?K~\xb1\xe4\x17K\xee?\xde\xdd\xdd\xdd\xdd\xdd\xed?K~\xb1\xe4\x17K\xee?K~\xb1\xe4\x17K\xee?K~\xb1\xe4\x17K\xee?q=\n\xd7\xa3p\xed?q=\n\xd7\xa3p\xed?q=\n\xd7\xa3p\xed?\x03\x9d6\xd0i\x03\xed?\x03\x9d6\xd0i\x03\xed?\x03\x9d6\xd0i\x03\xed?\x03\x9d6\xd0i\x03\xed?\x03\x9d6\xd0i\x03\xed?\x03\x9d6\xd0i\x03\xed?\x03\x9d6\xd0i\x03\xed?\x00\x00\x00\x00\x00\x00\xf0?\x00\x00\x00\x00\x00\x00\xf0?\x00\x00\x00\x00\x00\x00\xf0?\x00\x00\x00\x00\x00\x00\xf0?\x00\x00\x00\x00\x00\x00\xf0?\x93_,\xf9\xc5\x92\xef?\x93_,\xf9\xc5\x92\xef?\x93_,\xf9\xc5\x92\xef?\x93_,\xf9\xc5\x92\xef?\xb8\x1e\x85\xebQ\xb8\xee?K~\xb1\xe4\x17K\xee?q=\n\xd7\xa3p\xed?\x03\x9d6\xd0i\x03\xed?)\\\x8f\xc2\xf5(\xec?O\x1b\xe8\xb4\x81N\xeb?O\x1b\xe8\xb4\x81N\xeb?\xe1z\x14\xaeG\xe1\xea?t\xda@\xa7\rt\xea?t\xda@\xa7\rt\xea?t\xda@\xa7\rt\xea?\x07:m\xa0\xd3\x06\xea?\x07:m\xa0\xd3\x06\xea?t\xda@\xa7\rt\xea?t\xda@\xa7\rt\xea?\x07:m\xa0\xd3\x06\xea?\x07:m\xa0\xd3\x06\xea?\x9a\x99\x99\x99\x99\x99\xe9?\x00\x00\x00\x00\x00\x00\xf0?\x00\x00\x00\x00\x00\x00\xf0?\x00\x00\x00\x00\x00\x00\xf0?\x00\x00\x00\x00\x00\x00\xf0?\x00\x00\x00\x00\x00\x00\xf0?\x00\x00\x00\x00\x00\x00\xf0?\x00\x00\x00\x00\x00\x00\xf0?\x00\x00\x00\x00\x00\x00\xf0?\xde\xdd\xdd\xdd\xdd\xdd\xed?\x96\xfcb\xc9/\x96\xec?O\x1b\xe8\xb4\x81N\xeb?O\x1b\xe8\xb4\x81N\xeb?\xe1z\x14\xaeG\xe1\xea?\x9a\x99\x99\x99\x99\x99\xe9?,\xf9\xc5\x92_,\xe9?R\xb8\x1e\x85\xebQ\xe8?\xe5\x17K~\xb1\xe4\xe7?0\x96\xfcb\xc9/\xe6?UUUUUU\xe5?\xa0\xd3\x06:m\xa0\xe3?\xa0\xd3\x06:m\xa0\xe3?333333\xe3?333333\xe3?\xc6\x92_,\xf9\xc5\xe2?\xc6\x92_,\xf9\xc5\xe2?\xc6\x92_,\xf9\xc5\xe2?\xc6\x92_,\xf9\xc5\xe2?\x00\x00\x00\x00\x00\x00\xf0?\x00\x00\x00\x00\x00\x00\xf0?\x93_,\xf9\xc5\x92\xef?\x93_,\xf9\xc5\x92\xef?\x93_,\xf9\xc5\x92\xef?\x93_,\xf9\xc5\x92\xef?q=\n\xd7\xa3p\xed?O\x1b\xe8\xb4\x81N\xeb?\xe5\x17K~\xb1\xe4\xe7?333333\xe3?\x11\x11\x11\x11\x11\x11\xe1?7\xd0i\x03\x9d6\xe0?\x93_,\xf9\xc5\x92\xdf?\xb8\x1e\x85\xebQ\xb8\xde?\xde\xdd\xdd\xdd\xdd\xdd\xdd?\xde\xdd\xdd\xdd\xdd\xdd\xdd?\xde\xdd\xdd\xdd\xdd\xdd\xdd?O\x1b\xe8\xb4\x81N\xdb?O\x1b\xe8\xb4\x81N\xdb?O\x1b\xe8\xb4\x81N\xdb?t\xda@\xa7\rt\xda?t\xda@\xa7\rt\xda?O\x1b\xe8\xb4\x81N\xdb?O\x1b\xe8\xb4\x81N\xdb?\x03\x9d6\xd0i\x03\xdd?\x03\x9d6\xd0i\x03\xdd?\x03\x9d6\xd0i\x03\xdd?\x00\x00\x00\x00\x00\x00\xf0?\x00\x00\x00\x00\x00\x00\xf0?\x93_,\xf9\xc5\x92\xef?\x93_,\xf9\xc5\x92\xef?\x93_,\xf9\xc5\x92\xef?\x03\x9d6\xd0i\x03\xed?O\x1b\xe8\xb4\x81N\xeb?\xc3\xf5(\\\x8f\xc2\xe5?Y\xf2\x8b%\xbfX\xe2?\n\xd7\xa3p=\n\xd7?\x11\x11\x11\x11\x11\x11\xd1?\x03\x9d6\xd0i\x03\xcd?0\x96\xfcb\xc9/\xc6?{\x14\xaeG\xe1z\xc4?{\x14\xaeG\xe1z\xc4?\xc6\x92_,\xf9\xc5\xc2?\x11\x11\x11\x11\x11\x11\xc1?\x11\x11\x11\x11\x11\x11\xc1?\x11\x11\x11\x11\x11\x11\xc1?\xb8\x1e\x85\xebQ\xb8\xbe?\xb8\x1e\x85\xebQ\xb8\xbe?\xe5\x17K~\xb1\xe4\xb7?\xe5\x17K~\xb1\xe4\xb7?\xe5\x17K~\xb1\xe4\xb7?\xe5\x17K~\xb1\xe4\xb7?\xe5\x17K~\xb1\xe4\xb7?\xe5\x17K~\xb1\xe4\xb7?\x00\x00\x00\x00\x00\x00\xf0?\x00\x00\x00\x00\x00\x00\xf0?\x93_,\xf9\xc5\x92\xef?\x93_,\xf9\xc5\x92\xef?\xde\xdd\xdd\xdd\xdd\xdd\xed?\x03\x9d6\xd0i\x03\xed?\xbfX\xf2\x8b%\xbf\xe8?\x0et\xda@\xa7\r\xe4?\x93_,\xf9\xc5\x92\xdf?\xbfX\xf2\x8b%\xbf\xd8?{\x14\xaeG\xe1z\xd4?O\x1b\xe8\xb4\x81N\xcb?{\x14\xaeG\xe1z\xc4?{\x14\xaeG\xe1z\xc4?\xc6\x92_,\xf9\xc5\xc2?\xc6\x92_,\xf9\xc5\xc2?\xc6\x92_,\xf9\xc5\xc2?\x11\x11\x11\x11\x11\x11\xc1?\x11\x11\x11\x11\x11\x11\xc1?\x11\x11\x11\x11\x11\x11\xc1?\x11\x11\x11\x11\x11\x11\xc1?\x11\x11\x11\x11\x11\x11\xc1?\x11\x11\x11\x11\x11\x11\xc1?\x11\x11\x11\x11\x11\x11\xc1?\x11\x11\x11\x11\x11\x11\xc1?\x11\x11\x11\x11\x11\x11\xc1?\xb8\x1e\x85\xebQ\xb8\xbe?\x00\x00\x00\x00\x00\x00\xf0?\x00\x00\x00\x00\x00\x00\xf0?\x93_,\xf9\xc5\x92\xef?\x93_,\xf9\xc5\x92\xef?&\xbfX\xf2\x8b%\xef?\xb8\x1e\x85\xebQ\xb8\xee?q=\n\xd7\xa3p\xed?\x03\x9d6\xd0i\x03\xed?t\xda@\xa7\rt\xea?\x9a\x99\x99\x99\x99\x99\xe9?\xe5\x17K~\xb1\xe4\xe7?{\x14\xaeG\xe1z\xe4?\xc6\x92_,\xf9\xc5\xe2?~\xb1\xe4\x17K~\xe1?\xa4p=\n\xd7\xa3\xe0?\xde\xdd\xdd\xdd\xdd\xdd\xdd?\x03\x9d6\xd0i\x03\xdd?\x9a\x99\x99\x99\x99\x99\xd9?\xbfX\xf2\x8b%\xbf\xd8?0\x96\xfcb\xc9/\xd6?{\x14\xaeG\xe1z\xd4?\xecQ\xb8\x1e\x85\xeb\xd1?7\xd0i\x03\x9d6\xd0?7\xd0i\x03\x9d6\xd0?7\xd0i\x03\x9d6\xd0?7\xd0i\x03\x9d6\xd0?\xb8\x1e\x85\xebQ\xb8\xce?\x00\x00\x00\x00\x00\x00\xf0?\x00\x00\x00\x00\x00\x00\xf0?\x00\x00\x00\x00\x00\x00\xf0?\x00\x00\x00\x00\x00\x00\xf0?\x00\x00\x00\x00\x00\x00\xf0?\x00\x00\x00\x00\x00\x00\xf0?\x00\x00\x00\x00\x00\x00\xf0?\x00\x00\x00\x00\x00\x00\xf0?\x00\x00\x00\x00\x00\x00\xf0?\x00\x00\x00\x00\x00\x00\xf0?\x00\x00\x00\x00\x00\x00\xf0?\x00\x00\x00\x00\x00\x00\xf0?\x00\x00\x00\x00\x00\x00\xf0?\x00\x00\x00\x00\x00\x00\xf0?\x00\x00\x00\x00\x00\x00\xf0?\x00\x00\x00\x00\x00\x00\xf0?\x00\x00\x00\x00\x00\x00\xf0?\x00\x00\x00\x00\x00\x00\xf0?\x00\x00\x00\x00\x00\x00\xf0?\x00\x00\x00\x00\x00\x00\xf0?\x00\x00\x00\x00\x00\x00\xf0?\x00\x00\x00\x00\x00\x00\xf0?\x00\x00\x00\x00\x00\x00\xf0?\x00\x00\x00\x00\x00\x00\xf0?\x00\x00\x00\x00\x00\x00\xf0?\x00\x00\x00\x00\x00\x00\xf0?\x00\x00\x00\x00\x00\x00\xf0?\x00\x00\x00\x00\x00\x00\xf0?\x00\x00\x00\x00\x00\x00\xf0?\x00\x00\x00\x00\x00\x00\xf0?\x00\x00\x00\x00\x00\x00\xf0?\x00\x00\x00\x00\x00\x00\xf0?\x00\x00\x00\x00\x00\x00\xf0?\x00\x00\x00\x00\x00\x00\xf0?\x00\x00\x00\x00\x00\x00\xf0?\x00\x00\x00\x00\x00\x00\xf0?\x00\x00\x00\x00\x00\x00\xf0?\x00\x00\x00\x00\x00\x00\xf0?\x00\x00\x00\x00\x00\x00\xf0?\x00\x00\x00\x00\x00\x00\xf0?\x00\x00\x00\x00\x00\x00\xf0?\x00\x00\x00\x00\x00\x00\xf0?\x00\x00\x00\x00\x00\x00\xf0?\x00\x00\x00\x00\x00\x00\xf0?\x00\x00\x00\x00\x00\x00\xf0?\x00\x00\x00\x00\x00\x00\xf0?\x00\x00\x00\x00\x00\x00\xf0?\x00\x00\x00\x00\x00\x00\xf0?\x00\x00\x00\x00\x00\x00\xf0?\x00\x00\x00\x00\x00\x00\xf0?\x00\x00\x00\x00\x00\x00\xf0?\x00\x00\x00\x00\x00\x00\xf0?\x00\x00\x00\x00\x00\x00\xf0?\x00\x00\x00\x00\x00\x00\xf0?\x00\x00\x00\x00\x00\x00\xf0?\x00\x00\x00\x00\x00\x00\xf0?\x00\x00\x00\x00\x00\x00\xf0?\x00\x00\x00\x00\x00\x00\xf0?\x00\x00\x00\x00\x00\x00\xf0?\x00\x00\x00\x00\x00\x00\xf0?\x00\x00\x00\x00\x00\x00\xf0?\x00\x00\x00\x00\x00\x00\xf0?\x00\x00\x00\x00\x00\x00\xf0?\x00\x00\x00\x00\x00\x00\xf0?\x00\x00\x00\x00\x00\x00\xf0?\x00\x00\x00\x00\x00\x00\xf0?\x00\x00\x00\x00\x00\x00\xf0?\x00\x00\x00\x00\x00\x00\xf0?\x00\x00\x00\x00\x00\x00\xf0?\x00\x00\x00\x00\x00\x00\xf0?\x00\x00\x00\x00\x00\x00\xf0?\x00\x00\x00\x00\x00\x00\xf0?\x00\x00\x00\x00\x00\x00\xf0?\x00\x00\x00\x00\x00\x00\xf0?\x00\x00\x00\x00\x00\x00\xf0?\x00\x00\x00\x00\x00\x00\xf0?\x00\x00\x00\x00\x00\x00\xf0?\x00\x00\x00\x00\x00\x00\xf0?\x00\x00\x00\x00\x00\x00\xf0?\x00\x00\x00\x00\x00\x00\xf0?\x00\x00\x00\x00\x00\x00\xf0?\x00\x00\x00\x00\x00\x00\xf0?\x00\x00\x00\x00\x00\x00\xf0?\x00\x00\x00\x00\x00\x00\xf0?\x00\x00\x00\x00\x00\x00\xf0?\x00\x00\x00\x00\x00\x00\xf0?\x00\x00\x00\x00\x00\x00\xf0?\x00\x00\x00\x00\x00\x00\xf0?\x00\x00\x00\x00\x00\x00\xf0?\x00\x00\x00\x00\x00\x00\xf0?\x00\x00\x00\x00\x00\x00\xf0?\x00\x00\x00\x00\x00\x00\xf0?\x00\x00\x00\x00\x00\x00\xf0?\x00\x00\x00\x00\x00\x00\xf0?\x00\x00\x00\x00\x00\x00\xf0?\x00\x00\x00\x00\x00\x00\xf0?\x00\x00\x00\x00\x00\x00\xf0?\x00\x00\x00\x00\x00\x00\xf0?\x00\x00\x00\x00\x00\x00\xf0?\x00\x00\x00\x00\x00\x00\xf0?\x00\x00\x00\x00\x00\x00\xf0?\x00\x00\x00\x00\x00\x00\xf0?\x00\x00\x00\x00\x00\x00\xf0?\x00\x00\x00\x00\x00\x00\xf0?\x00\x00\x00\x00\x00\x00\xf0?\x00\x00\x00\x00\x00\x00\xf0?\x00\x00\x00\x00\x00\x00\xf0?\x00\x00\x00\x00\x00\x00\xf0?\x00\x00\x00\x00\x00\x00\xf0?\x00\x00\x00\x00\x00\x00\xf0?\x00\x00\x00\x00\x00\x00\xf0?\x00\x00\x00\x00\x00\x00\xf0?\x00\x00\x00\x00\x00\x00\xf0?\x00\x00\x00\x00\x00\x00\xf0?\x00\x00\x00\x00\x00\x00\xf0?\x93_,\xf9\xc5\x92\xef?\x93_,\xf9\xc5\x92\xef?\x93_,\xf9\xc5\x92\xef?\x93_,\xf9\xc5\x92\xef?\x00\x00\x00\x00\x00\x00\xf0?\x00\x00\x00\x00\x00\x00\xf0?\x00\x00\x00\x00\x00\x00\xf0?\x00\x00\x00\x00\x00\x00\xf0?\x00\x00\x00\x00\x00\x00\xf0?\x00\x00\x00\x00\x00\x00\xf0?\x00\x00\x00\x00\x00\x00\xf0?\x00\x00\x00\x00\x00\x00\xf0?\x00\x00\x00\x00\x00\x00\xf0?\x00\x00\x00\x00\x00\x00\xf0?\x00\x00\x00\x00\x00\x00\xf0?\x00\x00\x00\x00\x00\x00\xf0?\x00\x00\x00\x00\x00\x00\xf0?\x00\x00\x00\x00\x00\x00\xf0?\x00\x00\x00\x00\x00\x00\xf0?\x00\x00\x00\x00\x00\x00\xf0?\x00\x00\x00\x00\x00\x00\xf0?\x00\x00\x00\x00\x00\x00\xf0?\x00\x00\x00\x00\x00\x00\xf0?\x00\x00\x00\x00\x00\x00\xf0?\x00\x00\x00\x00\x00\x00\xf0?\x93_,\xf9\xc5\x92\xef?\x93_,\xf9\xc5\x92\xef?\x00\x00\x00\x00\x00\x00\xf0?\x93_,\xf9\xc5\x92\xef?\x93_,\xf9\xc5\x92\xef?\x93_,\xf9\xc5\x92\xef?\x93_,\xf9\xc5\x92\xef?\x93_,\xf9\xc5\x92\xef?\x93_,\xf9\xc5\x92\xef?\x93_,\xf9\xc5\x92\xef?\x00\x00\x00\x00\x00\x00\xf0?\x00\x00\x00\x00\x00\x00\xf0?\x00\x00\x00\x00\x00\x00\xf0?\x00\x00\x00\x00\x00\x00\xf0?\x00\x00\x00\x00\x00\x00\xf0?\x00\x00\x00\x00\x00\x00\xf0?\x00\x00\x00\x00\x00\x00\xf0?\x00\x00\x00\x00\x00\x00\xf0?\x00\x00\x00\x00\x00\x00\xf0?\x00\x00\x00\x00\x00\x00\xf0?\x00\x00\x00\x00\x00\x00\xf0?\x00\x00\x00\x00\x00\x00\xf0?\x00\x00\x00\x00\x00\x00\xf0?\x00\x00\x00\x00\x00\x00\xf0?\x00\x00\x00\x00\x00\x00\xf0?\x00\x00\x00\x00\x00\x00\xf0?\x00\x00\x00\x00\x00\x00\xf0?\x00\x00\x00\x00\x00\x00\xf0?\x00\x00\x00\x00\x00\x00\xf0?\x00\x00\x00\x00\x00\x00\xf0?\x00\x00\x00\x00\x00\x00\xf0?\x00\x00\x00\x00\x00\x00\xf0?\x00\x00\x00\x00\x00\x00\xf0?\x00\x00\x00\x00\x00\x00\xf0?\x00\x00\x00\x00\x00\x00\xf0?\x93_,\xf9\xc5\x92\xef?\x93_,\xf9\xc5\x92\xef?\x93_,\xf9\xc5\x92\xef?\x93_,\xf9\xc5\x92\xef?\x93_,\xf9\xc5\x92\xef?\x93_,\xf9\xc5\x92\xef?\x93_,\xf9\xc5\x92\xef?\x93_,\xf9\xc5\x92\xef?\x93_,\xf9\xc5\x92\xef?\x93_,\xf9\xc5\x92\xef?\x93_,\xf9\xc5\x92\xef?\x93_,\xf9\xc5\x92\xef?\x93_,\xf9\xc5\x92\xef?\x93_,\xf9\xc5\x92\xef?\x00\x00\x00\x00\x00\x00\xf0?\x00\x00\x00\x00\x00\x00\xf0?\x00\x00\x00\x00\x00\x00\xf0?\x00\x00\x00\x00\x00\x00\xf0?\x00\x00\x00\x00\x00\x00\xf0?\x00\x00\x00\x00\x00\x00\xf0?\x00\x00\x00\x00\x00\x00\xf0?\x00\x00\x00\x00\x00\x00\xf0?\x00\x00\x00\x00\x00\x00\xf0?\x00\x00\x00\x00\x00\x00\xf0?\x00\x00\x00\x00\x00\x00\xf0?\x00\x00\x00\x00\x00\x00\xf0?\x00\x00\x00\x00\x00\x00\xf0?\x00\x00\x00\x00\x00\x00\xf0?\x00\x00\x00\x00\x00\x00\xf0?\x00\x00\x00\x00\x00\x00\xf0?\x00\x00\x00\x00\x00\x00\xf0?\x00\x00\x00\x00\x00\x00\xf0?\x00\x00\x00\x00\x00\x00\xf0?\x00\x00\x00\x00\x00\x00\xf0?\x00\x00\x00\x00\x00\x00\xf0?\x00\x00\x00\x00\x00\x00\xf0?\x00\x00\x00\x00\x00\x00\xf0?\x00\x00\x00\x00\x00\x00\xf0?\x00\x00\x00\x00\x00\x00\xf0?\x00\x00\x00\x00\x00\x00\xf0?\x00\x00\x00\x00\x00\x00\xf0?\x00\x00\x00\x00\x00\x00\xf0?\x00\x00\x00\x00\x00\x00\xf0?\x00\x00\x00\x00\x00\x00\xf0?\x00\x00\x00\x00\x00\x00\xf0?\x93_,\xf9\xc5\x92\xef?&\xbfX\xf2\x8b%\xef?&\xbfX\xf2\x8b%\xef?&\xbfX\xf2\x8b%\xef?\xb8\x1e\x85\xebQ\xb8\xee?&\xbfX\xf2\x8b%\xef?&\xbfX\xf2\x8b%\xef?\x93_,\xf9\xc5\x92\xef?\x93_,\xf9\xc5\x92\xef?\x93_,\xf9\xc5\x92\xef?\x93_,\xf9\xc5\x92\xef?\x93_,\xf9\xc5\x92\xef?\x93_,\xf9\xc5\x92\xef?\x93_,\xf9\xc5\x92\xef?&\xbfX\xf2\x8b%\xef?&\xbfX\xf2\x8b%\xef?&\xbfX\xf2\x8b%\xef?&\xbfX\xf2\x8b%\xef?&\xbfX\xf2\x8b%\xef?&\xbfX\xf2\x8b%\xef?&\xbfX\xf2\x8b%\xef?&\xbfX\xf2\x8b%\xef?&\xbfX\xf2\x8b%\xef?\x00\x00\x00\x00\x00\x00\xf0?\x00\x00\x00\x00\x00\x00\xf0?\x00\x00\x00\x00\x00\x00\xf0?\x93_,\xf9\xc5\x92\xef?\x93_,\xf9\xc5\x92\xef?&\xbfX\xf2\x8b%\xef?&\xbfX\xf2\x8b%\xef?&\xbfX\xf2\x8b%\xef?&\xbfX\xf2\x8b%\xef?\x93_,\xf9\xc5\x92\xef?\x93_,\xf9\xc5\x92\xef?\x93_,\xf9\xc5\x92\xef?\x00\x00\x00\x00\x00\x00\xf0?\x00\x00\x00\x00\x00\x00\xf0?\x00\x00\x00\x00\x00\x00\xf0?&\xbfX\xf2\x8b%\xef?&\xbfX\xf2\x8b%\xef?\x93_,\xf9\xc5\x92\xef?\x93_,\xf9\xc5\x92\xef?\x93_,\xf9\xc5\x92\xef?\x93_,\xf9\xc5\x92\xef?\x93_,\xf9\xc5\x92\xef?\x93_,\xf9\xc5\x92\xef?\x93_,\xf9\xc5\x92\xef?\x93_,\xf9\xc5\x92\xef?&\xbfX\xf2\x8b%\xef?&\xbfX\xf2\x8b%\xef?\x00\x00\x00\x00\x00\x00\xf0?\x00\x00\x00\x00\x00\x00\xf0?\x93_,\xf9\xc5\x92\xef?&\xbfX\xf2\x8b%\xef?&\xbfX\xf2\x8b%\xef?\xb8\x1e\x85\xebQ\xb8\xee?K~\xb1\xe4\x17K\xee?q=\n\xd7\xa3p\xed?\xe1z\x14\xaeG\xe1\xea?\x9a\x99\x99\x99\x99\x99\xe9?R\xb8\x1e\x85\xebQ\xe8?0\x96\xfcb\xc9/\xe6?{\x14\xaeG\xe1z\xe4?333333\xe3?\xecQ\xb8\x1e\x85\xeb\xe1?7\xd0i\x03\x9d6\xe0?\xb8\x1e\x85\xebQ\xb8\xde?O\x1b\xe8\xb4\x81N\xdb?\x9a\x99\x99\x99\x99\x99\xd9?\n\xd7\xa3p=\n\xd7?UUUUUU\xd5?{\x14\xaeG\xe1z\xd4?{\x14\xaeG\xe1z\xd4?{\x14\xaeG\xe1z\xd4?\xa0\xd3\x06:m\xa0\xd3?\xa0\xd3\x06:m\xa0\xd3?\xa0\xd3\x06:m\xa0\xd3?\x00\x00\x00\x00\x00\x00\xf0?\x00\x00\x00\x00\x00\x00\xf0?\x93_,\xf9\xc5\x92\xef?&\xbfX\xf2\x8b%\xef?\xb8\x1e\x85\xebQ\xb8\xee?K~\xb1\xe4\x17K\xee?\x03\x9d6\xd0i\x03\xed?O\x1b\xe8\xb4\x81N\xeb?wwwwww\xe7?\x9d6\xd0i\x03\x9d\xe6?\xe8\xb4\x81N\x1b\xe8\xe4?\xecQ\xb8\x1e\x85\xeb\xe1?\xde\xdd\xdd\xdd\xdd\xdd\xdd?)\\\x8f\xc2\xf5(\xdc?\xe5\x17K~\xb1\xe4\xd7?\n\xd7\xa3p=\n\xd7?{\x14\xaeG\xe1z\xd4?{\x14\xaeG\xe1z\xd4?\xa0\xd3\x06:m\xa0\xd3?\xecQ\xb8\x1e\x85\xeb\xd1?\x11\x11\x11\x11\x11\x11\xd1?\x11\x11\x11\x11\x11\x11\xd1?\x03\x9d6\xd0i\x03\xcd?\x03\x9d6\xd0i\x03\xcd?\x03\x9d6\xd0i\x03\xcd?O\x1b\xe8\xb4\x81N\xcb?\x03\x9d6\xd0i\x03\xcd?\x00\x00\x00\x00\x00\x00\xf0?\x93_,\xf9\xc5\x92\xef?&\xbfX\xf2\x8b%\xef?\xb8\x1e\x85\xebQ\xb8\xee?\xb8\x1e\x85\xebQ\xb8\xee?\x03\x9d6\xd0i\x03\xed?\xbc\xbb\xbb\xbb\xbb\xbb\xeb?\x07:m\xa0\xd3\x06\xea?\x07:m\xa0\xd3\x06\xea?\n\xd7\xa3p=\n\xe7?\x0et\xda@\xa7\r\xe4?Y\xf2\x8b%\xbfX\xe2?\x11\x11\x11\x11\x11\x11\xe1?\x03\x9d6\xd0i\x03\xdd?\xe5\x17K~\xb1\xe4\xd7?\n\xd7\xa3p=\n\xd7?UUUUUU\xd5?\xc6\x92_,\xf9\xc5\xd2?7\xd0i\x03\x9d6\xd0?7\xd0i\x03\x9d6\xd0?\xb8\x1e\x85\xebQ\xb8\xce?\x03\x9d6\xd0i\x03\xcd?\x03\x9d6\xd0i\x03\xcd?O\x1b\xe8\xb4\x81N\xcb?\x9a\x99\x99\x99\x99\x99\xc9?\xe5\x17K~\xb1\xe4\xc7?\xe5\x17K~\xb1\xe4\xc7?\x00\x00\x00\x00\x00\x00\xf0?\x00\x00\x00\x00\x00\x00\xf0?\x00\x00\x00\x00\x00\x00\xf0?\x00\x00\x00\x00\x00\x00\xf0?\x00\x00\x00\x00\x00\x00\xf0?\x00\x00\x00\x00\x00\x00\xf0?\x00\x00\x00\x00\x00\x00\xf0?\x00\x00\x00\x00\x00\x00\xf0?\x00\x00\x00\x00\x00\x00\xf0?\x00\x00\x00\x00\x00\x00\xf0?\x00\x00\x00\x00\x00\x00\xf0?\x00\x00\x00\x00\x00\x00\xf0?\x00\x00\x00\x00\x00\x00\xf0?\x00\x00\x00\x00\x00\x00\xf0?\x00\x00\x00\x00\x00\x00\xf0?\x00\x00\x00\x00\x00\x00\xf0?\x00\x00\x00\x00\x00\x00\xf0?\x00\x00\x00\x00\x00\x00\xf0?\x00\x00\x00\x00\x00\x00\xf0?\x00\x00\x00\x00\x00\x00\xf0?\x00\x00\x00\x00\x00\x00\xf0?\x00\x00\x00\x00\x00\x00\xf0?\x00\x00\x00\x00\x00\x00\xf0?\x00\x00\x00\x00\x00\x00\xf0?\x00\x00\x00\x00\x00\x00\xf0?\x00\x00\x00\x00\x00\x00\xf0?\x00\x00\x00\x00\x00\x00\xf0?\x00\x00\x00\x00\x00\x00\xf0?\x00\x00\x00\x00\x00\x00\xf0?\x00\x00\x00\x00\x00\x00\xf0?\x00\x00\x00\x00\x00\x00\xf0?\x00\x00\x00\x00\x00\x00\xf0?\x00\x00\x00\x00\x00\x00\xf0?\x00\x00\x00\x00\x00\x00\xf0?\x00\x00\x00\x00\x00\x00\xf0?\x00\x00\x00\x00\x00\x00\xf0?\x00\x00\x00\x00\x00\x00\xf0?\x00\x00\x00\x00\x00\x00\xf0?\x00\x00\x00\x00\x00\x00\xf0?\x00\x00\x00\x00\x00\x00\xf0?\x00\x00\x00\x00\x00\x00\xf0?\x00\x00\x00\x00\x00\x00\xf0?\x00\x00\x00\x00\x00\x00\xf0?\x00\x00\x00\x00\x00\x00\xf0?\x00\x00\x00\x00\x00\x00\xf0?\x00\x00\x00\x00\x00\x00\xf0?\x00\x00\x00\x00\x00\x00\xf0?\x00\x00\x00\x00\x00\x00\xf0?\x00\x00\x00\x00\x00\x00\xf0?\x00\x00\x00\x00\x00\x00\xf0?\x00\x00\x00\x00\x00\x00\xf0?\x00\x00\x00\x00\x00\x00\xf0?\x00\x00\x00\x00\x00\x00\xf0?\x00\x00\x00\x00\x00\x00\xf0?\x00\x00\x00\x00\x00\x00\xf0?\x00\x00\x00\x00\x00\x00\xf0?\x00\x00\x00\x00\x00\x00\xf0?\x00\x00\x00\x00\x00\x00\xf0?\x00\x00\x00\x00\x00\x00\xf0?\x00\x00\x00\x00\x00\x00\xf0?\x00\x00\x00\x00\x00\x00\xf0?\x00\x00\x00\x00\x00\x00\xf0?\x00\x00\x00\x00\x00\x00\xf0?\x00\x00\x00\x00\x00\x00\xf0?\x00\x00\x00\x00\x00\x00\xf0?\x00\x00\x00\x00\x00\x00\xf0?\x00\x00\x00\x00\x00\x00\xf0?\x00\x00\x00\x00\x00\x00\xf0?\x00\x00\x00\x00\x00\x00\xf0?\x00\x00\x00\x00\x00\x00\xf0?\x00\x00\x00\x00\x00\x00\xf0?\x00\x00\x00\x00\x00\x00\xf0?\x00\x00\x00\x00\x00\x00\xf0?\x00\x00\x00\x00\x00\x00\xf0?\x00\x00\x00\x00\x00\x00\xf0?\x00\x00\x00\x00\x00\x00\xf0?\x00\x00\x00\x00\x00\x00\xf0?\x00\x00\x00\x00\x00\x00\xf0?\x00\x00\x00\x00\x00\x00\xf0?\x00\x00\x00\x00\x00\x00\xf0?\x00\x00\x00\x00\x00\x00\xf0?\x00\x00\x00\x00\x00\x00\xf0?\x00\x00\x00\x00\x00\x00\xf0?\x00\x00\x00\x00\x00\x00\xf0?\x00\x00\x00\x00\x00\x00\xf0?\x00\x00\x00\x00\x00\x00\xf0?\x00\x00\x00\x00\x00\x00\xf0?\x00\x00\x00\x00\x00\x00\xf0?\x00\x00\x00\x00\x00\x00\xf0?\x00\x00\x00\x00\x00\x00\xf0?\x00\x00\x00\x00\x00\x00\xf0?\x00\x00\x00\x00\x00\x00\xf0?\x00\x00\x00\x00\x00\x00\xf0?\x00\x00\x00\x00\x00\x00\xf0?\x00\x00\x00\x00\x00\x00\xf0?\x00\x00\x00\x00\x00\x00\xf0?\x00\x00\x00\x00\x00\x00\xf0?\x00\x00\x00\x00\x00\x00\xf0?\x00\x00\x00\x00\x00\x00\xf0?\x00\x00\x00\x00\x00\x00\xf0?\x00\x00\x00\x00\x00\x00\xf0?\x00\x00\x00\x00\x00\x00\xf0?\x00\x00\x00\x00\x00\x00\xf0?\x00\x00\x00\x00\x00\x00\xf0?\x00\x00\x00\x00\x00\x00\xf0?\x00\x00\x00\x00\x00\x00\xf0?\x00\x00\x00\x00\x00\x00\xf0?\x00\x00\x00\x00\x00\x00\xf0?\x00\x00\x00\x00\x00\x00\xf0?\x00\x00\x00\x00\x00\x00\xf0?\x00\x00\x00\x00\x00\x00\xf0?\x00\x00\x00\x00\x00\x00\xf0?\x00\x00\x00\x00\x00\x00\xf0?\x00\x00\x00\x00\x00\x00\xf0?\x00\x00\x00\x00\x00\x00\xf0?\x00\x00\x00\x00\x00\x00\xf0?\x00\x00\x00\x00\x00\x00\xf0?\x00\x00\x00\x00\x00\x00\xf0?\x00\x00\x00\x00\x00\x00\xf0?\x00\x00\x00\x00\x00\x00\xf0?\x00\x00\x00\x00\x00\x00\xf0?\x00\x00\x00\x00\x00\x00\xf0?\x00\x00\x00\x00\x00\x00\xf0?\x00\x00\x00\x00\x00\x00\xf0?\x00\x00\x00\x00\x00\x00\xf0?\x00\x00\x00\x00\x00\x00\xf0?\x00\x00\x00\x00\x00\x00\xf0?\x00\x00\x00\x00\x00\x00\xf0?\x00\x00\x00\x00\x00\x00\xf0?\x00\x00\x00\x00\x00\x00\xf0?\x00\x00\x00\x00\x00\x00\xf0?\x00\x00\x00\x00\x00\x00\xf0?\x00\x00\x00\x00\x00\x00\xf0?\x00\x00\x00\x00\x00\x00\xf0?\x00\x00\x00\x00\x00\x00\xf0?\x00\x00\x00\x00\x00\x00\xf0?\x00\x00\x00\x00\x00\x00\xf0?\x00\x00\x00\x00\x00\x00\xf0?\x00\x00\x00\x00\x00\x00\xf0?\x00\x00\x00\x00\x00\x00\xf0?\x00\x00\x00\x00\x00\x00\xf0?\x00\x00\x00\x00\x00\x00\xf0?\x00\x00\x00\x00\x00\x00\xf0?\x00\x00\x00\x00\x00\x00\xf0?\x00\x00\x00\x00\x00\x00\xf0?\x00\x00\x00\x00\x00\x00\xf0?\x00\x00\x00\x00\x00\x00\xf0?\x00\x00\x00\x00\x00\x00\xf0?\x00\x00\x00\x00\x00\x00\xf0?\x00\x00\x00\x00\x00\x00\xf0?\x00\x00\x00\x00\x00\x00\xf0?\x00\x00\x00\x00\x00\x00\xf0?\x00\x00\x00\x00\x00\x00\xf0?\x00\x00\x00\x00\x00\x00\xf0?\x00\x00\x00\x00\x00\x00\xf0?\x00\x00\x00\x00\x00\x00\xf0?\x00\x00\x00\x00\x00\x00\xf0?\x00\x00\x00\x00\x00\x00\xf0?\x00\x00\x00\x00\x00\x00\xf0?\x00\x00\x00\x00\x00\x00\xf0?\x00\x00\x00\x00\x00\x00\xf0?\x00\x00\x00\x00\x00\x00\xf0?\x00\x00\x00\x00\x00\x00\xf0?\x00\x00\x00\x00\x00\x00\xf0?\x00\x00\x00\x00\x00\x00\xf0?\x00\x00\x00\x00\x00\x00\xf0?\x00\x00\x00\x00\x00\x00\xf0?\x93_,\xf9\xc5\x92\xef?\x93_,\xf9\xc5\x92\xef?&\xbfX\xf2\x8b%\xef?&\xbfX\xf2\x8b%\xef?&\xbfX\xf2\x8b%\xef?&\xbfX\xf2\x8b%\xef?&\xbfX\xf2\x8b%\xef?&\xbfX\xf2\x8b%\xef?&\xbfX\xf2\x8b%\xef?\xb8\x1e\x85\xebQ\xb8\xee?\xb8\x1e\x85\xebQ\xb8\xee?\xb8\x1e\x85\xebQ\xb8\xee?\xb8\x1e\x85\xebQ\xb8\xee?K~\xb1\xe4\x17K\xee?K~\xb1\xe4\x17K\xee?\xb8\x1e\x85\xebQ\xb8\xee?&\xbfX\xf2\x8b%\xef?&\xbfX\xf2\x8b%\xef?&\xbfX\xf2\x8b%\xef?&\xbfX\xf2\x8b%\xef?&\xbfX\xf2\x8b%\xef?&\xbfX\xf2\x8b%\xef?\x00\x00\x00\x00\x00\x00\xf0?\x00\x00\x00\x00\x00\x00\xf0?\x00\x00\x00\x00\x00\x00\xf0?\x00\x00\x00\x00\x00\x00\xf0?\x00\x00\x00\x00\x00\x00\xf0?\x93_,\xf9\xc5\x92\xef?\x93_,\xf9\xc5\x92\xef?\x93_,\xf9\xc5\x92\xef?&\xbfX\xf2\x8b%\xef?\xb8\x1e\x85\xebQ\xb8\xee?\xb8\x1e\x85\xebQ\xb8\xee?\xb8\x1e\x85\xebQ\xb8\xee?K~\xb1\xe4\x17K\xee?\xde\xdd\xdd\xdd\xdd\xdd\xed?\xde\xdd\xdd\xdd\xdd\xdd\xed?q=\n\xd7\xa3p\xed?\x03\x9d6\xd0i\x03\xed?\x03\x9d6\xd0i\x03\xed?\x96\xfcb\xc9/\x96\xec?\xbc\xbb\xbb\xbb\xbb\xbb\xeb?O\x1b\xe8\xb4\x81N\xeb?t\xda@\xa7\rt\xea?,\xf9\xc5\x92_,\xe9?,\xf9\xc5\x92_,\xe9?,\xf9\xc5\x92_,\xe9?\xbfX\xf2\x8b%\xbf\xe8?R\xb8\x1e\x85\xebQ\xe8?\x00\x00\x00\x00\x00\x00\xf0?\x00\x00\x00\x00\x00\x00\xf0?\x00\x00\x00\x00\x00\x00\xf0?\x00\x00\x00\x00\x00\x00\xf0?\x00\x00\x00\x00\x00\x00\xf0?\x93_,\xf9\xc5\x92\xef?&\xbfX\xf2\x8b%\xef?\xb8\x1e\x85\xebQ\xb8\xee?K~\xb1\xe4\x17K\xee?\xde\xdd\xdd\xdd\xdd\xdd\xed?\x03\x9d6\xd0i\x03\xed?\xbc\xbb\xbb\xbb\xbb\xbb\xeb?O\x1b\xe8\xb4\x81N\xeb?\x9a\x99\x99\x99\x99\x99\xe9?\xe5\x17K~\xb1\xe4\xe7?\x9d6\xd0i\x03\x9d\xe6?0\x96\xfcb\xc9/\xe6?\xc3\xf5(\\\x8f\xc2\xe5?\xc3\xf5(\\\x8f\xc2\xe5?{\x14\xaeG\xe1z\xe4?\xa0\xd3\x06:m\xa0\xe3?\xa0\xd3\x06:m\xa0\xe3?\xc6\x92_,\xf9\xc5\xe2?Y\xf2\x8b%\xbfX\xe2?~\xb1\xe4\x17K~\xe1?\x11\x11\x11\x11\x11\x11\xe1?\xa4p=\n\xd7\xa3\xe0?\x00\x00\x00\x00\x00\x00\xf0?\x00\x00\x00\x00\x00\x00\xf0?\x00\x00\x00\x00\x00\x00\xf0?\x93_,\xf9\xc5\x92\xef?\xb8\x1e\x85\xebQ\xb8\xee?q=\n\xd7\xa3p\xed?)\\\x8f\xc2\xf5(\xec?\xbc\xbb\xbb\xbb\xbb\xbb\xeb?,\xf9\xc5\x92_,\xe9?R\xb8\x1e\x85\xebQ\xe8?\xc3\xf5(\\\x8f\xc2\xe5?333333\xe3?7\xd0i\x03\x9d6\xe0?\xde\xdd\xdd\xdd\xdd\xdd\xdd?\n\xd7\xa3p=\n\xd7?UUUUUU\xd5?\xc6\x92_,\xf9\xc5\xd2?7\xd0i\x03\x9d6\xd0?7\xd0i\x03\x9d6\xd0?7\xd0i\x03\x9d6\xd0?7\xd0i\x03\x9d6\xd0?\x03\x9d6\xd0i\x03\xcd?O\x1b\xe8\xb4\x81N\xcb?\x9a\x99\x99\x99\x99\x99\xc9?\x9a\x99\x99\x99\x99\x99\xc9?\xe5\x17K~\xb1\xe4\xc7?\xe5\x17K~\xb1\xe4\xc7?\x00\x00\x00\x00\x00\x00\xf0?\x00\x00\x00\x00\x00\x00\xf0?\x00\x00\x00\x00\x00\x00\xf0?\x93_,\xf9\xc5\x92\xef?\xb8\x1e\x85\xebQ\xb8\xee?\xb8\x1e\x85\xebQ\xb8\xee?\x96\xfcb\xc9/\x96\xec?\x07:m\xa0\xd3\x06\xea?{\x14\xaeG\xe1z\xe4?~\xb1\xe4\x17K~\xe1?\x03\x9d6\xd0i\x03\xdd?\x9a\x99\x99\x99\x99\x99\xd9?UUUUUU\xd5?\xc6\x92_,\xf9\xc5\xd2?\xc6\x92_,\xf9\xc5\xd2?\xecQ\xb8\x1e\x85\xeb\xd1?\x11\x11\x11\x11\x11\x11\xd1?\x11\x11\x11\x11\x11\x11\xd1?O\x1b\xe8\xb4\x81N\xcb?0\x96\xfcb\xc9/\xc6?{\x14\xaeG\xe1z\xc4?\xc6\x92_,\xf9\xc5\xc2?\x11\x11\x11\x11\x11\x11\xc1?\x11\x11\x11\x11\x11\x11\xc1?\x11\x11\x11\x11\x11\x11\xc1?\x11\x11\x11\x11\x11\x11\xc1?\x11\x11\x11\x11\x11\x11\xc1?\x00\x00\x00\x00\x00\x00\xf0?\x00\x00\x00\x00\x00\x00\xf0?\x00\x00\x00\x00\x00\x00\xf0?\x93_,\xf9\xc5\x92\xef?\xb8\x1e\x85\xebQ\xb8\xee?t\xda@\xa7\rt\xea?wwwwww\xe7?\x93_,\xf9\xc5\x92\xdf?0\x96\xfcb\xc9/\xd6?\x11\x11\x11\x11\x11\x11\xd1?\x03\x9d6\xd0i\x03\xcd?\xe5\x17K~\xb1\xe4\xc7?\xc6\x92_,\xf9\xc5\xc2?\x11\x11\x11\x11\x11\x11\xc1?\xb8\x1e\x85\xebQ\xb8\xbe?\xb8\x1e\x85\xebQ\xb8\xbe?\xb8\x1e\x85\xebQ\xb8\xbe?\xb8\x1e\x85\xebQ\xb8\xbe?\xb8\x1e\x85\xebQ\xb8\xbe?O\x1b\xe8\xb4\x81N\xbb?O\x1b\xe8\xb4\x81N\xbb?O\x1b\xe8\xb4\x81N\xbb?O\x1b\xe8\xb4\x81N\xbb?O\x1b\xe8\xb4\x81N\xbb?O\x1b\xe8\xb4\x81N\xbb?O\x1b\xe8\xb4\x81N\xbb?O\x1b\xe8\xb4\x81N\xbb?\x00\x00\x00\x00\x00\x00\xf0?\x00\x00\x00\x00\x00\x00\xf0?\x00\x00\x00\x00\x00\x00\xf0?\xb8\x1e\x85\xebQ\xb8\xee?q=\n\xd7\xa3p\xed?\x9a\x99\x99\x99\x99\x99\xe9?\n\xd7\xa3p=\n\xe7?\xa0\xd3\x06:m\xa0\xe3?\xde\xdd\xdd\xdd\xdd\xdd\xdd?0\x96\xfcb\xc9/\xd6?\xc6\x92_,\xf9\xc5\xd2?7\xd0i\x03\x9d6\xd0?O\x1b\xe8\xb4\x81N\xcb?{\x14\xaeG\xe1z\xc4?\xb8\x1e\x85\xebQ\xb8\xbe?\xb8\x1e\x85\xebQ\xb8\xbe?O\x1b\xe8\xb4\x81N\xbb?O\x1b\xe8\xb4\x81N\xbb?\xe5\x17K~\xb1\xe4\xb7?{\x14\xaeG\xe1z\xb4?{\x14\xaeG\xe1z\xb4?{\x14\xaeG\xe1z\xb4?{\x14\xaeG\xe1z\xb4?{\x14\xaeG\xe1z\xb4?{\x14\xaeG\xe1z\xb4?{\x14\xaeG\xe1z\xb4?{\x14\xaeG\xe1z\xb4?\x00\x00\x00\x00\x00\x00\xf0?\x00\x00\x00\x00\x00\x00\xf0?\x00\x00\x00\x00\x00\x00\xf0?\x00\x00\x00\x00\x00\x00\xf0?\x00\x00\x00\x00\x00\x00\xf0?\x00\x00\x00\x00\x00\x00\xf0?\x00\x00\x00\x00\x00\x00\xf0?\x00\x00\x00\x00\x00\x00\xf0?\x00\x00\x00\x00\x00\x00\xf0?\x00\x00\x00\x00\x00\x00\xf0?\x00\x00\x00\x00\x00\x00\xf0?\x00\x00\x00\x00\x00\x00\xf0?\x00\x00\x00\x00\x00\x00\xf0?\x00\x00\x00\x00\x00\x00\xf0?\x00\x00\x00\x00\x00\x00\xf0?\x00\x00\x00\x00\x00\x00\xf0?\x00\x00\x00\x00\x00\x00\xf0?\x00\x00\x00\x00\x00\x00\xf0?\x00\x00\x00\x00\x00\x00\xf0?\x00\x00\x00\x00\x00\x00\xf0?\x00\x00\x00\x00\x00\x00\xf0?\x00\x00\x00\x00\x00\x00\xf0?\x00\x00\x00\x00\x00\x00\xf0?\x00\x00\x00\x00\x00\x00\xf0?\x00\x00\x00\x00\x00\x00\xf0?\x00\x00\x00\x00\x00\x00\xf0?\x00\x00\x00\x00\x00\x00\xf0?\x00\x00\x00\x00\x00\x00\xf0?\x00\x00\x00\x00\x00\x00\xf0?\x00\x00\x00\x00\x00\x00\xf0?\x00\x00\x00\x00\x00\x00\xf0?\x00\x00\x00\x00\x00\x00\xf0?\x00\x00\x00\x00\x00\x00\xf0?\x00\x00\x00\x00\x00\x00\xf0?\x00\x00\x00\x00\x00\x00\xf0?\x00\x00\x00\x00\x00\x00\xf0?\x00\x00\x00\x00\x00\x00\xf0?\x00\x00\x00\x00\x00\x00\xf0?\x00\x00\x00\x00\x00\x00\xf0?\x00\x00\x00\x00\x00\x00\xf0?\x00\x00\x00\x00\x00\x00\xf0?\x00\x00\x00\x00\x00\x00\xf0?\x00\x00\x00\x00\x00\x00\xf0?\x00\x00\x00\x00\x00\x00\xf0?\x00\x00\x00\x00\x00\x00\xf0?\x00\x00\x00\x00\x00\x00\xf0?\x00\x00\x00\x00\x00\x00\xf0?\x00\x00\x00\x00\x00\x00\xf0?\x00\x00\x00\x00\x00\x00\xf0?\x00\x00\x00\x00\x00\x00\xf0?\x00\x00\x00\x00\x00\x00\xf0?\x00\x00\x00\x00\x00\x00\xf0?\x00\x00\x00\x00\x00\x00\xf0?\x00\x00\x00\x00\x00\x00\xf0?\x00\x00\x00\x00\x00\x00\xf0?\x93_,\xf9\xc5\x92\xef?\x93_,\xf9\xc5\x92\xef?\x93_,\xf9\xc5\x92\xef?\x93_,\xf9\xc5\x92\xef?\x93_,\xf9\xc5\x92\xef?\x93_,\xf9\xc5\x92\xef?\x00\x00\x00\x00\x00\x00\xf0?\x00\x00\x00\x00\x00\x00\xf0?\x00\x00\x00\x00\x00\x00\xf0?\x00\x00\x00\x00\x00\x00\xf0?\x00\x00\x00\x00\x00\x00\xf0?\x00\x00\x00\x00\x00\x00\xf0?\x00\x00\x00\x00\x00\x00\xf0?\x00\x00\x00\x00\x00\x00\xf0?\x00\x00\x00\x00\x00\x00\xf0?\x00\x00\x00\x00\x00\x00\xf0?\x00\x00\x00\x00\x00\x00\xf0?\x00\x00\x00\x00\x00\x00\xf0?\x00\x00\x00\x00\x00\x00\xf0?\x00\x00\x00\x00\x00\x00\xf0?\x00\x00\x00\x00\x00\x00\xf0?\x00\x00\x00\x00\x00\x00\xf0?\x00\x00\x00\x00\x00\x00\xf0?\x00\x00\x00\x00\x00\x00\xf0?\x00\x00\x00\x00\x00\x00\xf0?\x00\x00\x00\x00\x00\x00\xf0?\x00\x00\x00\x00\x00\x00\xf0?\x00\x00\x00\x00\x00\x00\xf0?\x00\x00\x00\x00\x00\x00\xf0?\x00\x00\x00\x00\x00\x00\xf0?\x00\x00\x00\x00\x00\x00\xf0?\x00\x00\x00\x00\x00\x00\xf0?\x00\x00\x00\x00\x00\x00\xf0?\x00\x00\x00\x00\x00\x00\xf0?\x00\x00\x00\x00\x00\x00\xf0?\x00\x00\x00\x00\x00\x00\xf0?\x00\x00\x00\x00\x00\x00\xf0?\x00\x00\x00\x00\x00\x00\xf0?\x00\x00\x00\x00\x00\x00\xf0?\x00\x00\x00\x00\x00\x00\xf0?\x00\x00\x00\x00\x00\x00\xf0?\x00\x00\x00\x00\x00\x00\xf0?\x00\x00\x00\x00\x00\x00\xf0?\x00\x00\x00\x00\x00\x00\xf0?\x00\x00\x00\x00\x00\x00\xf0?\x00\x00\x00\x00\x00\x00\xf0?\x00\x00\x00\x00\x00\x00\xf0?\x00\x00\x00\x00\x00\x00\xf0?\x00\x00\x00\x00\x00\x00\xf0?\x00\x00\x00\x00\x00\x00\xf0?\x00\x00\x00\x00\x00\x00\xf0?\x00\x00\x00\x00\x00\x00\xf0?\x00\x00\x00\x00\x00\x00\xf0?\x00\x00\x00\x00\x00\x00\xf0?\x93_,\xf9\xc5\x92\xef?\x00\x00\x00\x00\x00\x00\xf0?\x00\x00\x00\x00\x00\x00\xf0?\x00\x00\x00\x00\x00\x00\xf0?\x00\x00\x00\x00\x00\x00\xf0?\x00\x00\x00\x00\x00\x00\xf0?\x00\x00\x00\x00\x00\x00\xf0?\x00\x00\x00\x00\x00\x00\xf0?\x00\x00\x00\x00\x00\x00\xf0?\x00\x00\x00\x00\x00\x00\xf0?\x00\x00\x00\x00\x00\x00\xf0?\x00\x00\x00\x00\x00\x00\xf0?\x00\x00\x00\x00\x00\x00\xf0?\x00\x00\x00\x00\x00\x00\xf0?\x00\x00\x00\x00\x00\x00\xf0?\x00\x00\x00\x00\x00\x00\xf0?\x00\x00\x00\x00\x00\x00\xf0?\x00\x00\x00\x00\x00\x00\xf0?\x00\x00\x00\x00\x00\x00\xf0?\x00\x00\x00\x00\x00\x00\xf0?\x00\x00\x00\x00\x00\x00\xf0?\x00\x00\x00\x00\x00\x00\xf0?\x00\x00\x00\x00\x00\x00\xf0?\x00\x00\x00\x00\x00\x00\xf0?\x00\x00\x00\x00\x00\x00\xf0?\x00\x00\x00\x00\x00\x00\xf0?\x00\x00\x00\x00\x00\x00\xf0?\x93_,\xf9\xc5\x92\xef?\x93_,\xf9\xc5\x92\xef?\x93_,\xf9\xc5\x92\xef?\x93_,\xf9\xc5\x92\xef?\x00\x00\x00\x00\x00\x00\xf0?\x00\x00\x00\x00\x00\x00\xf0?\x00\x00\x00\x00\x00\x00\xf0?\x00\x00\x00\x00\x00\x00\xf0?\x00\x00\x00\x00\x00\x00\xf0?\x00\x00\x00\x00\x00\x00\xf0?\x00\x00\x00\x00\x00\x00\xf0?\x00\x00\x00\x00\x00\x00\xf0?\x00\x00\x00\x00\x00\x00\xf0?\x00\x00\x00\x00\x00\x00\xf0?\x00\x00\x00\x00\x00\x00\xf0?\x00\x00\x00\x00\x00\x00\xf0?\x00\x00\x00\x00\x00\x00\xf0?\x00\x00\x00\x00\x00\x00\xf0?\x00\x00\x00\x00\x00\x00\xf0?\x00\x00\x00\x00\x00\x00\xf0?\x00\x00\x00\x00\x00\x00\xf0?\x00\x00\x00\x00\x00\x00\xf0?\x00\x00\x00\x00\x00\x00\xf0?\x00\x00\x00\x00\x00\x00\xf0?\x00\x00\x00\x00\x00\x00\xf0?\x00\x00\x00\x00\x00\x00\xf0?\x00\x00\x00\x00\x00\x00\xf0?\x93_,\xf9\xc5\x92\xef?\x93_,\xf9\xc5\x92\xef?\x93_,\xf9\xc5\x92\xef?\x93_,\xf9\xc5\x92\xef?\x93_,\xf9\xc5\x92\xef?\x93_,\xf9\xc5\x92\xef?\x93_,\xf9\xc5\x92\xef?\x93_,\xf9\xc5\x92\xef?\x93_,\xf9\xc5\x92\xef?\x00\x00\x00\x00\x00\x00\xf0?\x00\x00\x00\x00\x00\x00\xf0?\x00\x00\x00\x00\x00\x00\xf0?\x00\x00\x00\x00\x00\x00\xf0?\x00\x00\x00\x00\x00\x00\xf0?\x00\x00\x00\x00\x00\x00\xf0?\x00\x00\x00\x00\x00\x00\xf0?\x00\x00\x00\x00\x00\x00\xf0?\x00\x00\x00\x00\x00\x00\xf0?\x00\x00\x00\x00\x00\x00\xf0?\x00\x00\x00\x00\x00\x00\xf0?\x00\x00\x00\x00\x00\x00\xf0?\x00\x00\x00\x00\x00\x00\xf0?\x00\x00\x00\x00\x00\x00\xf0?\x00\x00\x00\x00\x00\x00\xf0?\x00\x00\x00\x00\x00\x00\xf0?\x00\x00\x00\x00\x00\x00\xf0?\x00\x00\x00\x00\x00\x00\xf0?\x93_,\xf9\xc5\x92\xef?\x93_,\xf9\xc5\x92\xef?\x93_,\xf9\xc5\x92\xef?\x93_,\xf9\xc5\x92\xef?\x93_,\xf9\xc5\x92\xef?\x93_,\xf9\xc5\x92\xef?\x93_,\xf9\xc5\x92\xef?\x93_,\xf9\xc5\x92\xef?\x93_,\xf9\xc5\x92\xef?\x93_,\xf9\xc5\x92\xef?\x93_,\xf9\xc5\x92\xef?&\xbfX\xf2\x8b%\xef?\x93_,\xf9\xc5\x92\xef?\x93_,\xf9\xc5\x92\xef?\x00\x00\x00\x00\x00\x00\xf0?\x00\x00\x00\x00\x00\x00\xf0?\x00\x00\x00\x00\x00\x00\xf0?\x00\x00\x00\x00\x00\x00\xf0?\x00\x00\x00\x00\x00\x00\xf0?\x00\x00\x00\x00\x00\x00\xf0?\x00\x00\x00\x00\x00\x00\xf0?\x00\x00\x00\x00\x00\x00\xf0?\x00\x00\x00\x00\x00\x00\xf0?\x00\x00\x00\x00\x00\x00\xf0?\x00\x00\x00\x00\x00\x00\xf0?\x00\x00\x00\x00\x00\x00\xf0?\x00\x00\x00\x00\x00\x00\xf0?\x93_,\xf9\xc5\x92\xef?\x93_,\xf9\xc5\x92\xef?\x93_,\xf9\xc5\x92\xef?\x93_,\xf9\xc5\x92\xef?\x93_,\xf9\xc5\x92\xef?\x93_,\xf9\xc5\x92\xef?\x93_,\xf9\xc5\x92\xef?&\xbfX\xf2\x8b%\xef?&\xbfX\xf2\x8b%\xef?&\xbfX\xf2\x8b%\xef?\xb8\x1e\x85\xebQ\xb8\xee?\xb8\x1e\x85\xebQ\xb8\xee?\xb8\x1e\x85\xebQ\xb8\xee?\xb8\x1e\x85\xebQ\xb8\xee?\xb8\x1e\x85\xebQ\xb8\xee?\xb8\x1e\x85\xebQ\xb8\xee?\xb8\x1e\x85\xebQ\xb8\xee?\xb8\x1e\x85\xebQ\xb8\xee?\xb8\x1e\x85\xebQ\xb8\xee?K~\xb1\xe4\x17K\xee?K~\xb1\xe4\x17K\xee?K~\xb1\xe4\x17K\xee?\xb8\x1e\x85\xebQ\xb8\xee?\xb8\x1e\x85\xebQ\xb8\xee?\xb8\x1e\x85\xebQ\xb8\xee?\xb8\x1e\x85\xebQ\xb8\xee?\x00\x00\x00\x00\x00\x00\xf0?\x93_,\xf9\xc5\x92\xef?\x93_,\xf9\xc5\x92\xef?&\xbfX\xf2\x8b%\xef?&\xbfX\xf2\x8b%\xef?\xb8\x1e\x85\xebQ\xb8\xee?K~\xb1\xe4\x17K\xee?q=\n\xd7\xa3p\xed?\x07:m\xa0\xd3\x06\xea?R\xb8\x1e\x85\xebQ\xe8?0\x96\xfcb\xc9/\xe6?UUUUUU\xe5?333333\xe3?333333\xe3?\xc6\x92_,\xf9\xc5\xe2?Y\xf2\x8b%\xbfX\xe2?~\xb1\xe4\x17K~\xe1?~\xb1\xe4\x17K~\xe1?\x11\x11\x11\x11\x11\x11\xe1?\xa4p=\n\xd7\xa3\xe0?7\xd0i\x03\x9d6\xe0?7\xd0i\x03\x9d6\xe0?\x93_,\xf9\xc5\x92\xdf?\x93_,\xf9\xc5\x92\xdf?\x93_,\xf9\xc5\x92\xdf?\x93_,\xf9\xc5\x92\xdf?\x93_,\xf9\xc5\x92\xdf?\x00\x00\x00\x00\x00\x00\xf0?\x93_,\xf9\xc5\x92\xef?&\xbfX\xf2\x8b%\xef?&\xbfX\xf2\x8b%\xef?K~\xb1\xe4\x17K\xee?K~\xb1\xe4\x17K\xee?q=\n\xd7\xa3p\xed?O\x1b\xe8\xb4\x81N\xeb?\x9a\x99\x99\x99\x99\x99\xe9?R\xb8\x1e\x85\xebQ\xe8?{\x14\xaeG\xe1z\xe4?7\xd0i\x03\x9d6\xe0?\xb8\x1e\x85\xebQ\xb8\xde?\xbfX\xf2\x8b%\xbf\xd8?\xa0\xd3\x06:m\xa0\xd3?\xecQ\xb8\x1e\x85\xeb\xd1?\xb8\x1e\x85\xebQ\xb8\xce?O\x1b\xe8\xb4\x81N\xcb?\xe5\x17K~\xb1\xe4\xc7?\xe5\x17K~\xb1\xe4\xc7?\xe5\x17K~\xb1\xe4\xc7?0\x96\xfcb\xc9/\xc6?\xc6\x92_,\xf9\xc5\xc2?\x11\x11\x11\x11\x11\x11\xc1?\x11\x11\x11\x11\x11\x11\xc1?\x11\x11\x11\x11\x11\x11\xc1?\x11\x11\x11\x11\x11\x11\xc1?\x00\x00\x00\x00\x00\x00\xf0?\x93_,\xf9\xc5\x92\xef?&\xbfX\xf2\x8b%\xef?\xb8\x1e\x85\xebQ\xb8\xee?K~\xb1\xe4\x17K\xee?q=\n\xd7\xa3p\xed?\xbc\xbb\xbb\xbb\xbb\xbb\xeb?R\xb8\x1e\x85\xebQ\xe8?UUUUUU\xe5?333333\xe3?\xa4p=\n\xd7\xa3\xe0?\x9a\x99\x99\x99\x99\x99\xd9?\xecQ\xb8\x1e\x85\xeb\xd1?\x9a\x99\x99\x99\x99\x99\xc9?{\x14\xaeG\xe1z\xc4?\xc6\x92_,\xf9\xc5\xc2?\x11\x11\x11\x11\x11\x11\xc1?\x11\x11\x11\x11\x11\x11\xc1?\xb8\x1e\x85\xebQ\xb8\xbe?O\x1b\xe8\xb4\x81N\xbb?\xe5\x17K~\xb1\xe4\xb7?\xe5\x17K~\xb1\xe4\xb7?\xe5\x17K~\xb1\xe4\xb7?\xe5\x17K~\xb1\xe4\xb7?\xe5\x17K~\xb1\xe4\xb7?\xe5\x17K~\xb1\xe4\xb7?\xe5\x17K~\xb1\xe4\xb7?\x00\x00\x00\x00\x00\x00\xf0?\x93_,\xf9\xc5\x92\xef?&\xbfX\xf2\x8b%\xef?\xb8\x1e\x85\xebQ\xb8\xee?K~\xb1\xe4\x17K\xee?\xde\xdd\xdd\xdd\xdd\xdd\xed?q=\n\xd7\xa3p\xed?\xbc\xbb\xbb\xbb\xbb\xbb\xeb?\xbc\xbb\xbb\xbb\xbb\xbb\xeb?\x07:m\xa0\xd3\x06\xea?\n\xd7\xa3p=\n\xe7?0\x96\xfcb\xc9/\xe6?333333\xe3?~\xb1\xe4\x17K~\xe1?7\xd0i\x03\x9d6\xe0?)\\\x8f\xc2\xf5(\xdc?\xe5\x17K~\xb1\xe4\xd7?\xa0\xd3\x06:m\xa0\xd3?\xb8\x1e\x85\xebQ\xb8\xce?O\x1b\xe8\xb4\x81N\xcb?0\x96\xfcb\xc9/\xc6?0\x96\xfcb\xc9/\xc6?{\x14\xaeG\xe1z\xc4?{\x14\xaeG\xe1z\xc4?{\x14\xaeG\xe1z\xc4?\xc6\x92_,\xf9\xc5\xc2?\x11\x11\x11\x11\x11\x11\xc1?\xb8\x1e\x85\xebQ\xb8\xee?\xb8\x1e\x85\xebQ\xb8\xee?\xb8\x1e\x85\xebQ\xb8\xee?K~\xb1\xe4\x17K\xee?K~\xb1\xe4\x17K\xee?K~\xb1\xe4\x17K\xee?K~\xb1\xe4\x17K\xee?K~\xb1\xe4\x17K\xee?K~\xb1\xe4\x17K\xee?\xde\xdd\xdd\xdd\xdd\xdd\xed?q=\n\xd7\xa3p\xed?\x03\x9d6\xd0i\x03\xed?)\\\x8f\xc2\xf5(\xec?)\\\x8f\xc2\xf5(\xec?)\\\x8f\xc2\xf5(\xec?\xbc\xbb\xbb\xbb\xbb\xbb\xeb?\xbc\xbb\xbb\xbb\xbb\xbb\xeb?\xbc\xbb\xbb\xbb\xbb\xbb\xeb?\xbc\xbb\xbb\xbb\xbb\xbb\xeb?O\x1b\xe8\xb4\x81N\xeb?O\x1b\xe8\xb4\x81N\xeb?O\x1b\xe8\xb4\x81N\xeb?O\x1b\xe8\xb4\x81N\xeb?O\x1b\xe8\xb4\x81N\xeb?O\x1b\xe8\xb4\x81N\xeb?O\x1b\xe8\xb4\x81N\xeb?O\x1b\xe8\xb4\x81N\xeb?\xb8\x1e\x85\xebQ\xb8\xee?\xb8\x1e\x85\xebQ\xb8\xee?\xb8\x1e\x85\xebQ\xb8\xee?K~\xb1\xe4\x17K\xee?K~\xb1\xe4\x17K\xee?K~\xb1\xe4\x17K\xee?K~\xb1\xe4\x17K\xee?q=\n\xd7\xa3p\xed?\x03\x9d6\xd0i\x03\xed?\x96\xfcb\xc9/\x96\xec?)\\\x8f\xc2\xf5(\xec?)\\\x8f\xc2\xf5(\xec?\xbc\xbb\xbb\xbb\xbb\xbb\xeb?\xbc\xbb\xbb\xbb\xbb\xbb\xeb?\xbc\xbb\xbb\xbb\xbb\xbb\xeb?\xbc\xbb\xbb\xbb\xbb\xbb\xeb?O\x1b\xe8\xb4\x81N\xeb?\xe1z\x14\xaeG\xe1\xea?t\xda@\xa7\rt\xea?t\xda@\xa7\rt\xea?t\xda@\xa7\rt\xea?t\xda@\xa7\rt\xea?t\xda@\xa7\rt\xea?\xe1z\x14\xaeG\xe1\xea?\xe1z\x14\xaeG\xe1\xea?\xe1z\x14\xaeG\xe1\xea?t\xda@\xa7\rt\xea?\xb8\x1e\x85\xebQ\xb8\xee?\xb8\x1e\x85\xebQ\xb8\xee?\xb8\x1e\x85\xebQ\xb8\xee?\xb8\x1e\x85\xebQ\xb8\xee?\xb8\x1e\x85\xebQ\xb8\xee?\xb8\x1e\x85\xebQ\xb8\xee?K~\xb1\xe4\x17K\xee?K~\xb1\xe4\x17K\xee?\xde\xdd\xdd\xdd\xdd\xdd\xed?\xde\xdd\xdd\xdd\xdd\xdd\xed?q=\n\xd7\xa3p\xed?\x03\x9d6\xd0i\x03\xed?\x96\xfcb\xc9/\x96\xec?\x96\xfcb\xc9/\x96\xec?\x96\xfcb\xc9/\x96\xec?\x96\xfcb\xc9/\x96\xec?\x96\xfcb\xc9/\x96\xec?\x96\xfcb\xc9/\x96\xec?\x96\xfcb\xc9/\x96\xec?\x96\xfcb\xc9/\x96\xec?\x96\xfcb\xc9/\x96\xec?\x96\xfcb\xc9/\x96\xec?)\\\x8f\xc2\xf5(\xec?)\\\x8f\xc2\xf5(\xec?)\\\x8f\xc2\xf5(\xec?\xbc\xbb\xbb\xbb\xbb\xbb\xeb?\xbc\xbb\xbb\xbb\xbb\xbb\xeb?\xb8\x1e\x85\xebQ\xb8\xee?\xb8\x1e\x85\xebQ\xb8\xee?\xb8\x1e\x85\xebQ\xb8\xee?)\\\x8f\xc2\xf5(\xec?)\\\x8f\xc2\xf5(\xec?\xe1z\x14\xaeG\xe1\xea?t\xda@\xa7\rt\xea?\x07:m\xa0\xd3\x06\xea?\x07:m\xa0\xd3\x06\xea?,\xf9\xc5\x92_,\xe9?\xbfX\xf2\x8b%\xbf\xe8?\xe5\x17K~\xb1\xe4\xe7?\xe5\x17K~\xb1\xe4\xe7?wwwwww\xe7?\x9d6\xd0i\x03\x9d\xe6?\xc3\xf5(\\\x8f\xc2\xe5?UUUUUU\xe5?UUUUUU\xe5?\xe8\xb4\x81N\x1b\xe8\xe4?{\x14\xaeG\xe1z\xe4?\x0et\xda@\xa7\r\xe4?\x0et\xda@\xa7\r\xe4?333333\xe3?333333\xe3?333333\xe3?Y\xf2\x8b%\xbfX\xe2?~\xb1\xe4\x17K~\xe1?\xb8\x1e\x85\xebQ\xb8\xee?\xb8\x1e\x85\xebQ\xb8\xee?\xb8\x1e\x85\xebQ\xb8\xee?\x03\x9d6\xd0i\x03\xed?)\\\x8f\xc2\xf5(\xec?O\x1b\xe8\xb4\x81N\xeb?\x07:m\xa0\xd3\x06\xea?\x9a\x99\x99\x99\x99\x99\xe9?\x9a\x99\x99\x99\x99\x99\xe9?,\xf9\xc5\x92_,\xe9?\xbfX\xf2\x8b%\xbf\xe8?\n\xd7\xa3p=\n\xe7?0\x96\xfcb\xc9/\xe6?\xc3\xf5(\\\x8f\xc2\xe5?{\x14\xaeG\xe1z\xe4?\xa0\xd3\x06:m\xa0\xe3?333333\xe3?\xc6\x92_,\xf9\xc5\xe2?\xc6\x92_,\xf9\xc5\xe2?Y\xf2\x8b%\xbfX\xe2?\x11\x11\x11\x11\x11\x11\xe1?\xa4p=\n\xd7\xa3\xe0?\xa4p=\n\xd7\xa3\xe0?\xa4p=\n\xd7\xa3\xe0?\xa4p=\n\xd7\xa3\xe0?7\xd0i\x03\x9d6\xe0?\xb8\x1e\x85\xebQ\xb8\xde?\xb8\x1e\x85\xebQ\xb8\xee?\xb8\x1e\x85\xebQ\xb8\xee?\xb8\x1e\x85\xebQ\xb8\xee?K~\xb1\xe4\x17K\xee?)\\\x8f\xc2\xf5(\xec?\x07:m\xa0\xd3\x06\xea?\x9a\x99\x99\x99\x99\x99\xe9?,\xf9\xc5\x92_,\xe9?\xbfX\xf2\x8b%\xbf\xe8?\xbfX\xf2\x8b%\xbf\xe8?\xe5\x17K~\xb1\xe4\xe7?\xe5\x17K~\xb1\xe4\xe7?{\x14\xaeG\xe1z\xe4?\x0et\xda@\xa7\r\xe4?333333\xe3?\xc6\x92_,\xf9\xc5\xe2?\x11\x11\x11\x11\x11\x11\xe1?\x11\x11\x11\x11\x11\x11\xe1?\x11\x11\x11\x11\x11\x11\xe1?\x93_,\xf9\xc5\x92\xdf?\xb8\x1e\x85\xebQ\xb8\xde?\xb8\x1e\x85\xebQ\xb8\xde?\xb8\x1e\x85\xebQ\xb8\xde?\xb8\x1e\x85\xebQ\xb8\xde?\x03\x9d6\xd0i\x03\xdd?)\\\x8f\xc2\xf5(\xdc?O\x1b\xe8\xb4\x81N\xdb?\xb8\x1e\x85\xebQ\xb8\xee?\xb8\x1e\x85\xebQ\xb8\xee?\xbc\xbb\xbb\xbb\xbb\xbb\xeb?,\xf9\xc5\x92_,\xe9?\xe5\x17K~\xb1\xe4\xe7?0\x96\xfcb\xc9/\xe6?\xe8\xb4\x81N\x1b\xe8\xe4?~\xb1\xe4\x17K~\xe1?\xde\xdd\xdd\xdd\xdd\xdd\xdd?\n\xd7\xa3p=\n\xd7?{\x14\xaeG\xe1z\xd4?\xecQ\xb8\x1e\x85\xeb\xd1?\xb8\x1e\x85\xebQ\xb8\xce?\xb8\x1e\x85\xebQ\xb8\xbe?\xb8\x1e\x85\xebQ\xb8\xbe?O\x1b\xe8\xb4\x81N\xbb?O\x1b\xe8\xb4\x81N\xbb?\xe5\x17K~\xb1\xe4\xb7?\xe5\x17K~\xb1\xe4\xb7?{\x14\xaeG\xe1z\xb4?{\x14\xaeG\xe1z\xb4?{\x14\xaeG\xe1z\xb4?{\x14\xaeG\xe1z\xb4?{\x14\xaeG\xe1z\xb4?{\x14\xaeG\xe1z\xb4?{\x14\xaeG\xe1z\xb4?{\x14\xaeG\xe1z\xb4?\xb8\x1e\x85\xebQ\xb8\xee?\xb8\x1e\x85\xebQ\xb8\xee?\x03\x9d6\xd0i\x03\xed?)\\\x8f\xc2\xf5(\xec?,\xf9\xc5\x92_,\xe9?\xbfX\xf2\x8b%\xbf\xe8?\xe5\x17K~\xb1\xe4\xe7?0\x96\xfcb\xc9/\xe6?\xe8\xb4\x81N\x1b\xe8\xe4?Y\xf2\x8b%\xbfX\xe2?7\xd0i\x03\x9d6\xe0?O\x1b\xe8\xb4\x81N\xdb?O\x1b\xe8\xb4\x81N\xdb?\x9a\x99\x99\x99\x99\x99\xd9?\xe5\x17K~\xb1\xe4\xd7?{\x14\xaeG\xe1z\xd4?\xa0\xd3\x06:m\xa0\xd3?\x11\x11\x11\x11\x11\x11\xd1?\x03\x9d6\xd0i\x03\xcd?O\x1b\xe8\xb4\x81N\xcb?\x9a\x99\x99\x99\x99\x99\xc9?\xe5\x17K~\xb1\xe4\xc7?\xe5\x17K~\xb1\xe4\xc7?\xe5\x17K~\xb1\xe4\xc7?\xe5\x17K~\xb1\xe4\xc7?0\x96\xfcb\xc9/\xc6?0\x96\xfcb\xc9/\xc6?\xb8\x1e\x85\xebQ\xb8\xee?\xb8\x1e\x85\xebQ\xb8\xee?\x03\x9d6\xd0i\x03\xed?\xbc\xbb\xbb\xbb\xbb\xbb\xeb?\x9a\x99\x99\x99\x99\x99\xe9?\xe5\x17K~\xb1\xe4\xe7?wwwwww\xe7?\xc3\xf5(\\\x8f\xc2\xe5?Y\xf2\x8b%\xbfX\xe2?\xde\xdd\xdd\xdd\xdd\xdd\xdd?O\x1b\xe8\xb4\x81N\xdb?t\xda@\xa7\rt\xda?\xe5\x17K~\xb1\xe4\xd7?\xa0\xd3\x06:m\xa0\xd3?O\x1b\xe8\xb4\x81N\xcb?\x9a\x99\x99\x99\x99\x99\xc9?\xc6\x92_,\xf9\xc5\xc2?\xb8\x1e\x85\xebQ\xb8\xbe?O\x1b\xe8\xb4\x81N\xbb?\xe5\x17K~\xb1\xe4\xb7?\x11\x11\x11\x11\x11\x11\xb1?O\x1b\xe8\xb4\x81N\xab?O\x1b\xe8\xb4\x81N\x9b?O\x1b\xe8\xb4\x81N\x9b?O\x1b\xe8\xb4\x81N\x9b?O\x1b\xe8\xb4\x81N\x9b?O\x1b\xe8\xb4\x81N\x9b?\xb8\x1e\x85\xebQ\xb8\xee?K~\xb1\xe4\x17K\xee?t\xda@\xa7\rt\xea?R\xb8\x1e\x85\xebQ\xe8?\x9d6\xd0i\x03\x9d\xe6?333333\xe3?\xb8\x1e\x85\xebQ\xb8\xde?\xe5\x17K~\xb1\xe4\xd7?\xecQ\xb8\x1e\x85\xeb\xd1?\x9a\x99\x99\x99\x99\x99\xc9?0\x96\xfcb\xc9/\xc6?O\x1b\xe8\xb4\x81N\xbb?O\x1b\xe8\xb4\x81N\xbb?{\x14\xaeG\xe1z\xb4?{\x14\xaeG\xe1z\xb4?{\x14\xaeG\xe1z\xb4?{\x14\xaeG\xe1z\xb4?{\x14\xaeG\xe1z\xb4?{\x14\xaeG\xe1z\xb4?{\x14\xaeG\xe1z\xb4?{\x14\xaeG\xe1z\xb4?{\x14\xaeG\xe1z\xb4?{\x14\xaeG\xe1z\xb4?{\x14\xaeG\xe1z\xb4?{\x14\xaeG\xe1z\xb4?{\x14\xaeG\xe1z\xb4?{\x14\xaeG\xe1z\xb4?\xb8\x1e\x85\xebQ\xb8\xee?K~\xb1\xe4\x17K\xee?O\x1b\xe8\xb4\x81N\xeb?\x9a\x99\x99\x99\x99\x99\xe9?\xe5\x17K~\xb1\xe4\xe7?\xe8\xb4\x81N\x1b\xe8\xe4?Y\xf2\x8b%\xbfX\xe2?\xb8\x1e\x85\xebQ\xb8\xde?\xbfX\xf2\x8b%\xbf\xd8?\xc6\x92_,\xf9\xc5\xd2?\x11\x11\x11\x11\x11\x11\xd1?\x03\x9d6\xd0i\x03\xcd?\x9a\x99\x99\x99\x99\x99\xc9?\x11\x11\x11\x11\x11\x11\xc1?\xb8\x1e\x85\xebQ\xb8\xbe?O\x1b\xe8\xb4\x81N\xbb?\xe5\x17K~\xb1\xe4\xb7?{\x14\xaeG\xe1z\xb4?{\x14\xaeG\xe1z\xb4?{\x14\xaeG\xe1z\xb4?{\x14\xaeG\xe1z\xb4?{\x14\xaeG\xe1z\xb4?{\x14\xaeG\xe1z\xb4?{\x14\xaeG\xe1z\xb4?{\x14\xaeG\xe1z\xb4?{\x14\xaeG\xe1z\xb4?{\x14\xaeG\xe1z\xb4?\xb8\x1e\x85\xebQ\xb8\xee?K~\xb1\xe4\x17K\xee?\xe1z\x14\xaeG\xe1\xea?\xbfX\xf2\x8b%\xbf\xe8?\x9d6\xd0i\x03\x9d\xe6?333333\xe3?7\xd0i\x03\x9d6\xe0?t\xda@\xa7\rt\xda?\xc6\x92_,\xf9\xc5\xd2?7\xd0i\x03\x9d6\xd0?0\x96\xfcb\xc9/\xc6?\xc6\x92_,\xf9\xc5\xc2?\x11\x11\x11\x11\x11\x11\xc1?\xb8\x1e\x85\xebQ\xb8\xbe?\xe5\x17K~\xb1\xe4\xb7?\xe5\x17K~\xb1\xe4\xb7?\xe5\x17K~\xb1\xe4\xb7?\xe5\x17K~\xb1\xe4\xb7?\xe5\x17K~\xb1\xe4\xb7?{\x14\xaeG\xe1z\xb4?{\x14\xaeG\xe1z\xb4?{\x14\xaeG\xe1z\xb4?{\x14\xaeG\xe1z\xb4?{\x14\xaeG\xe1z\xb4?{\x14\xaeG\xe1z\xb4?{\x14\xaeG\xe1z\xb4?{\x14\xaeG\xe1z\xb4?\xb8\x1e\x85\xebQ\xb8\xee?\xde\xdd\xdd\xdd\xdd\xdd\xed?)\\\x8f\xc2\xf5(\xec?\x9a\x99\x99\x99\x99\x99\xe9?\xbfX\xf2\x8b%\xbf\xe8?UUUUUU\xe5?\xa0\xd3\x06:m\xa0\xe3?\xecQ\xb8\x1e\x85\xeb\xe1?7\xd0i\x03\x9d6\xe0?O\x1b\xe8\xb4\x81N\xdb?\xbfX\xf2\x8b%\xbf\xd8?UUUUUU\xd5?\xa0\xd3\x06:m\xa0\xd3?\xc6\x92_,\xf9\xc5\xd2?O\x1b\xe8\xb4\x81N\xcb?0\x96\xfcb\xc9/\xc6?0\x96\xfcb\xc9/\xc6?{\x14\xaeG\xe1z\xc4?\xc6\x92_,\xf9\xc5\xc2?\xb8\x1e\x85\xebQ\xb8\xbe?O\x1b\xe8\xb4\x81N\xbb?\xe5\x17K~\xb1\xe4\xb7?\xe5\x17K~\xb1\xe4\xb7?\xe5\x17K~\xb1\xe4\xb7?\xe5\x17K~\xb1\xe4\xb7?\xe5\x17K~\xb1\xe4\xb7?\xe5\x17K~\xb1\xe4\xb7?K~\xb1\xe4\x17K\xee?K~\xb1\xe4\x17K\xee?K~\xb1\xe4\x17K\xee?K~\xb1\xe4\x17K\xee?\xde\xdd\xdd\xdd\xdd\xdd\xed?q=\n\xd7\xa3p\xed?q=\n\xd7\xa3p\xed?q=\n\xd7\xa3p\xed?q=\n\xd7\xa3p\xed?q=\n\xd7\xa3p\xed?\x03\x9d6\xd0i\x03\xed?\x03\x9d6\xd0i\x03\xed?\x03\x9d6\xd0i\x03\xed?\x03\x9d6\xd0i\x03\xed?\x03\x9d6\xd0i\x03\xed?\x03\x9d6\xd0i\x03\xed?\x03\x9d6\xd0i\x03\xed?\x03\x9d6\xd0i\x03\xed?\xde\xdd\xdd\xdd\xdd\xdd\xed?\xde\xdd\xdd\xdd\xdd\xdd\xed?\xde\xdd\xdd\xdd\xdd\xdd\xed?\xde\xdd\xdd\xdd\xdd\xdd\xed?\xde\xdd\xdd\xdd\xdd\xdd\xed?\xde\xdd\xdd\xdd\xdd\xdd\xed?K~\xb1\xe4\x17K\xee?K~\xb1\xe4\x17K\xee?K~\xb1\xe4\x17K\xee?K~\xb1\xe4\x17K\xee?K~\xb1\xe4\x17K\xee?K~\xb1\xe4\x17K\xee?K~\xb1\xe4\x17K\xee?K~\xb1\xe4\x17K\xee?K~\xb1\xe4\x17K\xee?K~\xb1\xe4\x17K\xee?K~\xb1\xe4\x17K\xee?\xde\xdd\xdd\xdd\xdd\xdd\xed?\xde\xdd\xdd\xdd\xdd\xdd\xed?\xde\xdd\xdd\xdd\xdd\xdd\xed?\xde\xdd\xdd\xdd\xdd\xdd\xed?\xde\xdd\xdd\xdd\xdd\xdd\xed?\xde\xdd\xdd\xdd\xdd\xdd\xed?\xde\xdd\xdd\xdd\xdd\xdd\xed?\xde\xdd\xdd\xdd\xdd\xdd\xed?\xde\xdd\xdd\xdd\xdd\xdd\xed?\xde\xdd\xdd\xdd\xdd\xdd\xed?\xde\xdd\xdd\xdd\xdd\xdd\xed?\xde\xdd\xdd\xdd\xdd\xdd\xed?\xde\xdd\xdd\xdd\xdd\xdd\xed?\xde\xdd\xdd\xdd\xdd\xdd\xed?\xde\xdd\xdd\xdd\xdd\xdd\xed?\xde\xdd\xdd\xdd\xdd\xdd\xed?K~\xb1\xe4\x17K\xee?K~\xb1\xe4\x17K\xee?K~\xb1\xe4\x17K\xee?K~\xb1\xe4\x17K\xee?K~\xb1\xe4\x17K\xee?K~\xb1\xe4\x17K\xee?\xde\xdd\xdd\xdd\xdd\xdd\xed?\xde\xdd\xdd\xdd\xdd\xdd\xed?\xde\xdd\xdd\xdd\xdd\xdd\xed?\xde\xdd\xdd\xdd\xdd\xdd\xed?\xde\xdd\xdd\xdd\xdd\xdd\xed?\xde\xdd\xdd\xdd\xdd\xdd\xed?\xde\xdd\xdd\xdd\xdd\xdd\xed?\xde\xdd\xdd\xdd\xdd\xdd\xed?\xde\xdd\xdd\xdd\xdd\xdd\xed?\xde\xdd\xdd\xdd\xdd\xdd\xed?\xde\xdd\xdd\xdd\xdd\xdd\xed?q=\n\xd7\xa3p\xed?q=\n\xd7\xa3p\xed?q=\n\xd7\xa3p\xed?q=\n\xd7\xa3p\xed?q=\n\xd7\xa3p\xed?q=\n\xd7\xa3p\xed?q=\n\xd7\xa3p\xed?q=\n\xd7\xa3p\xed?q=\n\xd7\xa3p\xed?q=\n\xd7\xa3p\xed?q=\n\xd7\xa3p\xed?q=\n\xd7\xa3p\xed?q=\n\xd7\xa3p\xed?K~\xb1\xe4\x17K\xee?\xde\xdd\xdd\xdd\xdd\xdd\xed?\xde\xdd\xdd\xdd\xdd\xdd\xed?\xde\xdd\xdd\xdd\xdd\xdd\xed?\xde\xdd\xdd\xdd\xdd\xdd\xed?\xde\xdd\xdd\xdd\xdd\xdd\xed?K~\xb1\xe4\x17K\xee?\xde\xdd\xdd\xdd\xdd\xdd\xed?q=\n\xd7\xa3p\xed?q=\n\xd7\xa3p\xed?\xde\xdd\xdd\xdd\xdd\xdd\xed?\xde\xdd\xdd\xdd\xdd\xdd\xed?K~\xb1\xe4\x17K\xee?K~\xb1\xe4\x17K\xee?K~\xb1\xe4\x17K\xee?K~\xb1\xe4\x17K\xee?K~\xb1\xe4\x17K\xee?K~\xb1\xe4\x17K\xee?K~\xb1\xe4\x17K\xee?K~\xb1\xe4\x17K\xee?K~\xb1\xe4\x17K\xee?\xde\xdd\xdd\xdd\xdd\xdd\xed?\xde\xdd\xdd\xdd\xdd\xdd\xed?\xde\xdd\xdd\xdd\xdd\xdd\xed?\xde\xdd\xdd\xdd\xdd\xdd\xed?\xde\xdd\xdd\xdd\xdd\xdd\xed?\xde\xdd\xdd\xdd\xdd\xdd\xed?K~\xb1\xe4\x17K\xee?K~\xb1\xe4\x17K\xee?q=\n\xd7\xa3p\xed?q=\n\xd7\xa3p\xed?q=\n\xd7\xa3p\xed?q=\n\xd7\xa3p\xed?q=\n\xd7\xa3p\xed?q=\n\xd7\xa3p\xed?\x03\x9d6\xd0i\x03\xed?)\\\x8f\xc2\xf5(\xec?)\\\x8f\xc2\xf5(\xec?)\\\x8f\xc2\xf5(\xec?)\\\x8f\xc2\xf5(\xec?)\\\x8f\xc2\xf5(\xec?)\\\x8f\xc2\xf5(\xec?)\\\x8f\xc2\xf5(\xec?O\x1b\xe8\xb4\x81N\xeb?O\x1b\xe8\xb4\x81N\xeb?O\x1b\xe8\xb4\x81N\xeb?O\x1b\xe8\xb4\x81N\xeb?t\xda@\xa7\rt\xea?\x07:m\xa0\xd3\x06\xea?\x07:m\xa0\xd3\x06\xea?\x07:m\xa0\xd3\x06\xea?\x07:m\xa0\xd3\x06\xea?\x07:m\xa0\xd3\x06\xea?\x07:m\xa0\xd3\x06\xea?K~\xb1\xe4\x17K\xee?q=\n\xd7\xa3p\xed?q=\n\xd7\xa3p\xed?q=\n\xd7\xa3p\xed?q=\n\xd7\xa3p\xed?\x03\x9d6\xd0i\x03\xed?\x03\x9d6\xd0i\x03\xed?\x96\xfcb\xc9/\x96\xec?O\x1b\xe8\xb4\x81N\xeb?\xe1z\x14\xaeG\xe1\xea?\xe1z\x14\xaeG\xe1\xea?\xe1z\x14\xaeG\xe1\xea?t\xda@\xa7\rt\xea?\x07:m\xa0\xd3\x06\xea?\x07:m\xa0\xd3\x06\xea?\x9a\x99\x99\x99\x99\x99\xe9?,\xf9\xc5\x92_,\xe9?\xbfX\xf2\x8b%\xbf\xe8?\xe5\x17K~\xb1\xe4\xe7?R\xb8\x1e\x85\xebQ\xe8?\xe5\x17K~\xb1\xe4\xe7?\xe5\x17K~\xb1\xe4\xe7?\xe5\x17K~\xb1\xe4\xe7?\n\xd7\xa3p=\n\xe7?\x9d6\xd0i\x03\x9d\xe6?0\x96\xfcb\xc9/\xe6?0\x96\xfcb\xc9/\xe6?K~\xb1\xe4\x17K\xee?\xde\xdd\xdd\xdd\xdd\xdd\xed?q=\n\xd7\xa3p\xed?\x03\x9d6\xd0i\x03\xed?\x03\x9d6\xd0i\x03\xed?)\\\x8f\xc2\xf5(\xec?)\\\x8f\xc2\xf5(\xec?)\\\x8f\xc2\xf5(\xec?O\x1b\xe8\xb4\x81N\xeb?O\x1b\xe8\xb4\x81N\xeb?O\x1b\xe8\xb4\x81N\xeb?O\x1b\xe8\xb4\x81N\xeb?\xe1z\x14\xaeG\xe1\xea?\xe1z\x14\xaeG\xe1\xea?O\x1b\xe8\xb4\x81N\xeb?O\x1b\xe8\xb4\x81N\xeb?O\x1b\xe8\xb4\x81N\xeb?O\x1b\xe8\xb4\x81N\xeb?O\x1b\xe8\xb4\x81N\xeb?O\x1b\xe8\xb4\x81N\xeb?t\xda@\xa7\rt\xea?t\xda@\xa7\rt\xea?t\xda@\xa7\rt\xea?t\xda@\xa7\rt\xea?t\xda@\xa7\rt\xea?t\xda@\xa7\rt\xea?t\xda@\xa7\rt\xea?K~\xb1\xe4\x17K\xee?\xde\xdd\xdd\xdd\xdd\xdd\xed?q=\n\xd7\xa3p\xed?\x03\x9d6\xd0i\x03\xed?\x96\xfcb\xc9/\x96\xec?\x96\xfcb\xc9/\x96\xec?\xbc\xbb\xbb\xbb\xbb\xbb\xeb?\xe1z\x14\xaeG\xe1\xea?\x07:m\xa0\xd3\x06\xea?\x9a\x99\x99\x99\x99\x99\xe9?,\xf9\xc5\x92_,\xe9?wwwwww\xe7?\n\xd7\xa3p=\n\xe7?\x9d6\xd0i\x03\x9d\xe6?\x9d6\xd0i\x03\x9d\xe6?\xc3\xf5(\\\x8f\xc2\xe5?UUUUUU\xe5?UUUUUU\xe5?\x0et\xda@\xa7\r\xe4?\x0et\xda@\xa7\r\xe4?\xa0\xd3\x06:m\xa0\xe3?333333\xe3?333333\xe3?\xc6\x92_,\xf9\xc5\xe2?~\xb1\xe4\x17K~\xe1?~\xb1\xe4\x17K~\xe1?\x11\x11\x11\x11\x11\x11\xe1?K~\xb1\xe4\x17K\xee?\xde\xdd\xdd\xdd\xdd\xdd\xed?\x03\x9d6\xd0i\x03\xed?\x03\x9d6\xd0i\x03\xed?)\\\x8f\xc2\xf5(\xec?O\x1b\xe8\xb4\x81N\xeb?\xe1z\x14\xaeG\xe1\xea?\x07:m\xa0\xd3\x06\xea?\x9a\x99\x99\x99\x99\x99\xe9?,\xf9\xc5\x92_,\xe9?R\xb8\x1e\x85\xebQ\xe8?\xe5\x17K~\xb1\xe4\xe7?wwwwww\xe7?\x9d6\xd0i\x03\x9d\xe6?\xc3\xf5(\\\x8f\xc2\xe5?\xe8\xb4\x81N\x1b\xe8\xe4?{\x14\xaeG\xe1z\xe4?\xa0\xd3\x06:m\xa0\xe3?333333\xe3?\xc6\x92_,\xf9\xc5\xe2?\xecQ\xb8\x1e\x85\xeb\xe1?\x11\x11\x11\x11\x11\x11\xe1?\x11\x11\x11\x11\x11\x11\xe1?\xa4p=\n\xd7\xa3\xe0?\xa4p=\n\xd7\xa3\xe0?7\xd0i\x03\x9d6\xe0?7\xd0i\x03\x9d6\xe0?K~\xb1\xe4\x17K\xee?\xde\xdd\xdd\xdd\xdd\xdd\xed?q=\n\xd7\xa3p\xed?)\\\x8f\xc2\xf5(\xec?t\xda@\xa7\rt\xea?\x07:m\xa0\xd3\x06\xea?\x07:m\xa0\xd3\x06\xea?\xe5\x17K~\xb1\xe4\xe7?\x9d6\xd0i\x03\x9d\xe6?\xe8\xb4\x81N\x1b\xe8\xe4?\x0et\xda@\xa7\r\xe4?\x0et\xda@\xa7\r\xe4?\xa0\xd3\x06:m\xa0\xe3?\xc6\x92_,\xf9\xc5\xe2?Y\xf2\x8b%\xbfX\xe2?~\xb1\xe4\x17K~\xe1?\x11\x11\x11\x11\x11\x11\xe1?\x93_,\xf9\xc5\x92\xdf?\x93_,\xf9\xc5\x92\xdf?O\x1b\xe8\xb4\x81N\xdb?t\xda@\xa7\rt\xda?\x9a\x99\x99\x99\x99\x99\xd9?\n\xd7\xa3p=\n\xd7?{\x14\xaeG\xe1z\xd4?\xc6\x92_,\xf9\xc5\xd2?\x11\x11\x11\x11\x11\x11\xd1?7\xd0i\x03\x9d6\xd0?K~\xb1\xe4\x17K\xee?\xde\xdd\xdd\xdd\xdd\xdd\xed?\x03\x9d6\xd0i\x03\xed?O\x1b\xe8\xb4\x81N\xeb?\x07:m\xa0\xd3\x06\xea?R\xb8\x1e\x85\xebQ\xe8?\n\xd7\xa3p=\n\xe7?\xe8\xb4\x81N\x1b\xe8\xe4?\x0et\xda@\xa7\r\xe4?\xa0\xd3\x06:m\xa0\xe3?Y\xf2\x8b%\xbfX\xe2?\x93_,\xf9\xc5\x92\xdf?\x03\x9d6\xd0i\x03\xdd?\xbfX\xf2\x8b%\xbf\xd8?\xe5\x17K~\xb1\xe4\xd7?UUUUUU\xd5?\xa0\xd3\x06:m\xa0\xd3?\x11\x11\x11\x11\x11\x11\xd1?\xb8\x1e\x85\xebQ\xb8\xce?\x03\x9d6\xd0i\x03\xcd?\x03\x9d6\xd0i\x03\xcd?\x9a\x99\x99\x99\x99\x99\xc9?0\x96\xfcb\xc9/\xc6?0\x96\xfcb\xc9/\xc6?\xc6\x92_,\xf9\xc5\xc2?\xc6\x92_,\xf9\xc5\xc2?\xc6\x92_,\xf9\xc5\xc2?K~\xb1\xe4\x17K\xee?\x03\x9d6\xd0i\x03\xed?\x96\xfcb\xc9/\x96\xec?\x07:m\xa0\xd3\x06\xea?\xbfX\xf2\x8b%\xbf\xe8?\x9d6\xd0i\x03\x9d\xe6?UUUUUU\xe5?{\x14\xaeG\xe1z\xe4?Y\xf2\x8b%\xbfX\xe2?7\xd0i\x03\x9d6\xe0?\xde\xdd\xdd\xdd\xdd\xdd\xdd?O\x1b\xe8\xb4\x81N\xdb?\xbfX\xf2\x8b%\xbf\xd8?\xa0\xd3\x06:m\xa0\xd3?7\xd0i\x03\x9d6\xd0?7\xd0i\x03\x9d6\xd0?\xe5\x17K~\xb1\xe4\xc7?0\x96\xfcb\xc9/\xc6?{\x14\xaeG\xe1z\xc4?\xc6\x92_,\xf9\xc5\xc2?\x11\x11\x11\x11\x11\x11\xc1?\x11\x11\x11\x11\x11\x11\xc1?\xb8\x1e\x85\xebQ\xb8\xbe?\xb8\x1e\x85\xebQ\xb8\xbe?\xb8\x1e\x85\xebQ\xb8\xbe?\xb8\x1e\x85\xebQ\xb8\xbe?\xb8\x1e\x85\xebQ\xb8\xbe?K~\xb1\xe4\x17K\xee?q=\n\xd7\xa3p\xed?)\\\x8f\xc2\xf5(\xec?t\xda@\xa7\rt\xea?R\xb8\x1e\x85\xebQ\xe8?\n\xd7\xa3p=\n\xe7?\xe8\xb4\x81N\x1b\xe8\xe4?\xc6\x92_,\xf9\xc5\xe2?\xa4p=\n\xd7\xa3\xe0?7\xd0i\x03\x9d6\xe0?O\x1b\xe8\xb4\x81N\xdb?t\xda@\xa7\rt\xda?\n\xd7\xa3p=\n\xd7?UUUUUU\xd5?\xc6\x92_,\xf9\xc5\xd2?7\xd0i\x03\x9d6\xd0?\x03\x9d6\xd0i\x03\xcd?\x9a\x99\x99\x99\x99\x99\xc9?\xe5\x17K~\xb1\xe4\xc7?{\x14\xaeG\xe1z\xc4?\x11\x11\x11\x11\x11\x11\xc1?\xb8\x1e\x85\xebQ\xb8\xbe?\xb8\x1e\x85\xebQ\xb8\xbe?\xb8\x1e\x85\xebQ\xb8\xbe?\xb8\x1e\x85\xebQ\xb8\xbe?O\x1b\xe8\xb4\x81N\xbb?O\x1b\xe8\xb4\x81N\xbb?\x00\x00\x00\x00\x00\x00\xf0?\x00\x00\x00\x00\x00\x00\xf0?\x00\x00\x00\x00\x00\x00\xf0?\x00\x00\x00\x00\x00\x00\xf0?\x00\x00\x00\x00\x00\x00\xf0?\x00\x00\x00\x00\x00\x00\xf0?\x00\x00\x00\x00\x00\x00\xf0?\x00\x00\x00\x00\x00\x00\xf0?\x00\x00\x00\x00\x00\x00\xf0?\x00\x00\x00\x00\x00\x00\xf0?\x00\x00\x00\x00\x00\x00\xf0?\x00\x00\x00\x00\x00\x00\xf0?\x93_,\xf9\xc5\x92\xef?\x93_,\xf9\xc5\x92\xef?&\xbfX\xf2\x8b%\xef?&\xbfX\xf2\x8b%\xef?&\xbfX\xf2\x8b%\xef?&\xbfX\xf2\x8b%\xef?&\xbfX\xf2\x8b%\xef?&\xbfX\xf2\x8b%\xef?&\xbfX\xf2\x8b%\xef?&\xbfX\xf2\x8b%\xef?&\xbfX\xf2\x8b%\xef?&\xbfX\xf2\x8b%\xef?&\xbfX\xf2\x8b%\xef?&\xbfX\xf2\x8b%\xef?\xb8\x1e\x85\xebQ\xb8\xee?\x00\x00\x00\x00\x00\x00\xf0?\x00\x00\x00\x00\x00\x00\xf0?\x00\x00\x00\x00\x00\x00\xf0?\x00\x00\x00\x00\x00\x00\xf0?\x93_,\xf9\xc5\x92\xef?\x93_,\xf9\xc5\x92\xef?\x93_,\xf9\xc5\x92\xef?\x93_,\xf9\xc5\x92\xef?&\xbfX\xf2\x8b%\xef?&\xbfX\xf2\x8b%\xef?&\xbfX\xf2\x8b%\xef?&\xbfX\xf2\x8b%\xef?&\xbfX\xf2\x8b%\xef?\xb8\x1e\x85\xebQ\xb8\xee?\xb8\x1e\x85\xebQ\xb8\xee?\xb8\x1e\x85\xebQ\xb8\xee?\xb8\x1e\x85\xebQ\xb8\xee?\xb8\x1e\x85\xebQ\xb8\xee?&\xbfX\xf2\x8b%\xef?&\xbfX\xf2\x8b%\xef?&\xbfX\xf2\x8b%\xef?&\xbfX\xf2\x8b%\xef?\xb8\x1e\x85\xebQ\xb8\xee?\xb8\x1e\x85\xebQ\xb8\xee?\xb8\x1e\x85\xebQ\xb8\xee?\xb8\x1e\x85\xebQ\xb8\xee?\xb8\x1e\x85\xebQ\xb8\xee?\x00\x00\x00\x00\x00\x00\xf0?\x00\x00\x00\x00\x00\x00\xf0?\x00\x00\x00\x00\x00\x00\xf0?\x93_,\xf9\xc5\x92\xef?\x93_,\xf9\xc5\x92\xef?\x93_,\xf9\xc5\x92\xef?\x93_,\xf9\xc5\x92\xef?\x93_,\xf9\xc5\x92\xef?\x93_,\xf9\xc5\x92\xef?\x93_,\xf9\xc5\x92\xef?\x93_,\xf9\xc5\x92\xef?\x00\x00\x00\x00\x00\x00\xf0?\x00\x00\x00\x00\x00\x00\xf0?\x00\x00\x00\x00\x00\x00\xf0?\x00\x00\x00\x00\x00\x00\xf0?\x00\x00\x00\x00\x00\x00\xf0?\x00\x00\x00\x00\x00\x00\xf0?\x00\x00\x00\x00\x00\x00\xf0?\x00\x00\x00\x00\x00\x00\xf0?\x00\x00\x00\x00\x00\x00\xf0?\x00\x00\x00\x00\x00\x00\xf0?\x00\x00\x00\x00\x00\x00\xf0?\x00\x00\x00\x00\x00\x00\xf0?\x00\x00\x00\x00\x00\x00\xf0?\x00\x00\x00\x00\x00\x00\xf0?\x00\x00\x00\x00\x00\x00\xf0?\x00\x00\x00\x00\x00\x00\xf0?\x00\x00\x00\x00\x00\x00\xf0?\x00\x00\x00\x00\x00\x00\xf0?\x93_,\xf9\xc5\x92\xef?\x93_,\xf9\xc5\x92\xef?\xb8\x1e\x85\xebQ\xb8\xee?\xde\xdd\xdd\xdd\xdd\xdd\xed?\x03\x9d6\xd0i\x03\xed?\xbc\xbb\xbb\xbb\xbb\xbb\xeb?O\x1b\xe8\xb4\x81N\xeb?\x07:m\xa0\xd3\x06\xea?\x9a\x99\x99\x99\x99\x99\xe9?\x9a\x99\x99\x99\x99\x99\xe9?\x9a\x99\x99\x99\x99\x99\xe9?\x9a\x99\x99\x99\x99\x99\xe9?,\xf9\xc5\x92_,\xe9?,\xf9\xc5\x92_,\xe9?\xbfX\xf2\x8b%\xbf\xe8?\xbfX\xf2\x8b%\xbf\xe8?R\xb8\x1e\x85\xebQ\xe8?\xe5\x17K~\xb1\xe4\xe7?wwwwww\xe7?wwwwww\xe7?wwwwww\xe7?\xe5\x17K~\xb1\xe4\xe7?\xe5\x17K~\xb1\xe4\xe7?\xe5\x17K~\xb1\xe4\xe7?wwwwww\xe7?\x00\x00\x00\x00\x00\x00\xf0?\x93_,\xf9\xc5\x92\xef?\x93_,\xf9\xc5\x92\xef?\x96\xfcb\xc9/\x96\xec?\xe1z\x14\xaeG\xe1\xea?\xc3\xf5(\\\x8f\xc2\xe5?{\x14\xaeG\xe1z\xe4?\x0et\xda@\xa7\r\xe4?{\x14\xaeG\xe1z\xe4?\xc3\xf5(\\\x8f\xc2\xe5?\xc3\xf5(\\\x8f\xc2\xe5?R\xb8\x1e\x85\xebQ\xe8?\x9a\x99\x99\x99\x99\x99\xe9?O\x1b\xe8\xb4\x81N\xeb?\x96\xfcb\xc9/\x96\xec?K~\xb1\xe4\x17K\xee?K~\xb1\xe4\x17K\xee?\xb8\x1e\x85\xebQ\xb8\xee?&\xbfX\xf2\x8b%\xef?\x93_,\xf9\xc5\x92\xef?\x93_,\xf9\xc5\x92\xef?\x93_,\xf9\xc5\x92\xef?\x93_,\xf9\xc5\x92\xef?\x93_,\xf9\xc5\x92\xef?\x93_,\xf9\xc5\x92\xef?\x93_,\xf9\xc5\x92\xef?\x93_,\xf9\xc5\x92\xef?\x00\x00\x00\x00\x00\x00\xf0?\x93_,\xf9\xc5\x92\xef?\x93_,\xf9\xc5\x92\xef?K~\xb1\xe4\x17K\xee?\x03\x9d6\xd0i\x03\xed?)\\\x8f\xc2\xf5(\xec?t\xda@\xa7\rt\xea?\x07:m\xa0\xd3\x06\xea?\x9a\x99\x99\x99\x99\x99\xe9?\x9a\x99\x99\x99\x99\x99\xe9?,\xf9\xc5\x92_,\xe9?,\xf9\xc5\x92_,\xe9?\xbfX\xf2\x8b%\xbf\xe8?\x9a\x99\x99\x99\x99\x99\xe9?,\xf9\xc5\x92_,\xe9?,\xf9\xc5\x92_,\xe9?\x9a\x99\x99\x99\x99\x99\xe9?\x9a\x99\x99\x99\x99\x99\xe9?\x9a\x99\x99\x99\x99\x99\xe9?\x07:m\xa0\xd3\x06\xea?\x07:m\xa0\xd3\x06\xea?\x07:m\xa0\xd3\x06\xea?\x07:m\xa0\xd3\x06\xea?\x07:m\xa0\xd3\x06\xea?\x07:m\xa0\xd3\x06\xea?\x07:m\xa0\xd3\x06\xea?\x07:m\xa0\xd3\x06\xea?\x00\x00\x00\x00\x00\x00\xf0?\x93_,\xf9\xc5\x92\xef?\xb8\x1e\x85\xebQ\xb8\xee?)\\\x8f\xc2\xf5(\xec?\xe5\x17K~\xb1\xe4\xe7?\xc3\xf5(\\\x8f\xc2\xe5?Y\xf2\x8b%\xbfX\xe2?\x11\x11\x11\x11\x11\x11\xe1?\xecQ\xb8\x1e\x85\xeb\xe1?\xc6\x92_,\xf9\xc5\xe2?\xc6\x92_,\xf9\xc5\xe2?\xa0\xd3\x06:m\xa0\xe3?0\x96\xfcb\xc9/\xe6?wwwwww\xe7?\x07:m\xa0\xd3\x06\xea?t\xda@\xa7\rt\xea?\xbc\xbb\xbb\xbb\xbb\xbb\xeb?\x96\xfcb\xc9/\x96\xec?\xde\xdd\xdd\xdd\xdd\xdd\xed?\xb8\x1e\x85\xebQ\xb8\xee?\x93_,\xf9\xc5\x92\xef?\x00\x00\x00\x00\x00\x00\xf0?\x00\x00\x00\x00\x00\x00\xf0?\x00\x00\x00\x00\x00\x00\xf0?\x00\x00\x00\x00\x00\x00\xf0?\x00\x00\x00\x00\x00\x00\xf0?\x00\x00\x00\x00\x00\x00\xf0?\x00\x00\x00\x00\x00\x00\xf0?\x00\x00\x00\x00\x00\x00\xf0?\x93_,\xf9\xc5\x92\xef?\xde\xdd\xdd\xdd\xdd\xdd\xed?\x96\xfcb\xc9/\x96\xec?\xe1z\x14\xaeG\xe1\xea?wwwwww\xe7?Y\xf2\x8b%\xbfX\xe2?7\xd0i\x03\x9d6\xe0?O\x1b\xe8\xb4\x81N\xdb?\xe5\x17K~\xb1\xe4\xd7?{\x14\xaeG\xe1z\xd4?\xa0\xd3\x06:m\xa0\xd3?7\xd0i\x03\x9d6\xd0?7\xd0i\x03\x9d6\xd0?\xb8\x1e\x85\xebQ\xb8\xce?\xb8\x1e\x85\xebQ\xb8\xce?\x03\x9d6\xd0i\x03\xcd?\xe5\x17K~\xb1\xe4\xc7?\xe5\x17K~\xb1\xe4\xc7?\xe5\x17K~\xb1\xe4\xc7?\x9a\x99\x99\x99\x99\x99\xc9?\x9a\x99\x99\x99\x99\x99\xc9?\x9a\x99\x99\x99\x99\x99\xc9?\xe5\x17K~\xb1\xe4\xc7?0\x96\xfcb\xc9/\xc6?{\x14\xaeG\xe1z\xc4?\x00\x00\x00\x00\x00\x00\xf0?\x93_,\xf9\xc5\x92\xef?\x93_,\xf9\xc5\x92\xef?\xb8\x1e\x85\xebQ\xb8\xee?)\\\x8f\xc2\xf5(\xec?\xbfX\xf2\x8b%\xbf\xe8?0\x96\xfcb\xc9/\xe6?\x11\x11\x11\x11\x11\x11\xe1?\xb8\x1e\x85\xebQ\xb8\xde?O\x1b\xe8\xb4\x81N\xdb?0\x96\xfcb\xc9/\xd6?0\x96\xfcb\xc9/\xd6?{\x14\xaeG\xe1z\xd4?\xa0\xd3\x06:m\xa0\xd3?\xc6\x92_,\xf9\xc5\xd2?\x11\x11\x11\x11\x11\x11\xd1?\xb8\x1e\x85\xebQ\xb8\xce?\xb8\x1e\x85\xebQ\xb8\xce?\x9a\x99\x99\x99\x99\x99\xc9?\xe5\x17K~\xb1\xe4\xc7?0\x96\xfcb\xc9/\xc6?0\x96\xfcb\xc9/\xc6?\x11\x11\x11\x11\x11\x11\xc1?\xb8\x1e\x85\xebQ\xb8\xbe?\xb8\x1e\x85\xebQ\xb8\xbe?\xb8\x1e\x85\xebQ\xb8\xbe?\xb8\x1e\x85\xebQ\xb8\xbe?\x00\x00\x00\x00\x00\x00\xf0?\x93_,\xf9\xc5\x92\xef?\xb8\x1e\x85\xebQ\xb8\xee?)\\\x8f\xc2\xf5(\xec?\x9a\x99\x99\x99\x99\x99\xe9?\xa0\xd3\x06:m\xa0\xe3?\x93_,\xf9\xc5\x92\xdf?0\x96\xfcb\xc9/\xd6?0\x96\xfcb\xc9/\xc6?\xc6\x92_,\xf9\xc5\xc2?\xb8\x1e\x85\xebQ\xb8\xbe?O\x1b\xe8\xb4\x81N\xbb?O\x1b\xe8\xb4\x81N\xbb?O\x1b\xe8\xb4\x81N\xbb?O\x1b\xe8\xb4\x81N\xbb?\xe5\x17K~\xb1\xe4\xb7?\xe5\x17K~\xb1\xe4\xb7?\xe5\x17K~\xb1\xe4\xb7?\xe5\x17K~\xb1\xe4\xb7?\xe5\x17K~\xb1\xe4\xb7?\xe5\x17K~\xb1\xe4\xb7?\xe5\x17K~\xb1\xe4\xb7?\xe5\x17K~\xb1\xe4\xb7?\xe5\x17K~\xb1\xe4\xb7?\xe5\x17K~\xb1\xe4\xb7?\xe5\x17K~\xb1\xe4\xb7?\xe5\x17K~\xb1\xe4\xb7?\x00\x00\x00\x00\x00\x00\xf0?\x93_,\xf9\xc5\x92\xef?\xb8\x1e\x85\xebQ\xb8\xee?\x96\xfcb\xc9/\x96\xec?\x07:m\xa0\xd3\x06\xea?\n\xd7\xa3p=\n\xe7?\xecQ\xb8\x1e\x85\xeb\xe1?t\xda@\xa7\rt\xda?\xecQ\xb8\x1e\x85\xeb\xd1?\xe5\x17K~\xb1\xe4\xc7?\xc6\x92_,\xf9\xc5\xc2?\xe5\x17K~\xb1\xe4\xb7?{\x14\xaeG\xe1z\xb4?{\x14\xaeG\xe1z\xb4?{\x14\xaeG\xe1z\xb4?{\x14\xaeG\xe1z\xb4?{\x14\xaeG\xe1z\xb4?{\x14\xaeG\xe1z\xb4?{\x14\xaeG\xe1z\xb4?{\x14\xaeG\xe1z\xb4?{\x14\xaeG\xe1z\xb4?{\x14\xaeG\xe1z\xb4?\x00\x00\x00\x00\x00\x00\x00\x00\x00\x00\x00\x00\x00\x00\x00\x00\x00\x00\x00\x00\x00\x00\x00\x00\x00\x00\x00\x00\x00\x00\x00\x00\x00\x00\x00\x00\x00\x00\x00\x00\x00\x00\x00\x00\x00\x00\xf0?\x00\x00\x00\x00\x00\x00\xf0?&\xbfX\xf2\x8b%\xef?\xde\xdd\xdd\xdd\xdd\xdd\xed?\xe1z\x14\xaeG\xe1\xea?\n\xd7\xa3p=\n\xe7?\xc6\x92_,\xf9\xc5\xe2?UUUUUU\xd5?\xecQ\xb8\x1e\x85\xeb\xd1?7\xd0i\x03\x9d6\xd0?\x9a\x99\x99\x99\x99\x99\xc9?{\x14\xaeG\xe1z\xc4?\xb8\x1e\x85\xebQ\xb8\xbe?\xe5\x17K~\xb1\xe4\xb7?\xe5\x17K~\xb1\xe4\xb7?\xe5\x17K~\xb1\xe4\xb7?\xe5\x17K~\xb1\xe4\xb7?\xe5\x17K~\xb1\xe4\xb7?\xe5\x17K~\xb1\xe4\xb7?\xe5\x17K~\xb1\xe4\xb7?\xe5\x17K~\xb1\xe4\xb7?\xe5\x17K~\xb1\xe4\xb7?\xe5\x17K~\xb1\xe4\xb7?\xe5\x17K~\xb1\xe4\xb7?\xe5\x17K~\xb1\xe4\xb7?\xe5\x17K~\xb1\xe4\xb7?\xe5\x17K~\xb1\xe4\xb7?\x00\x00\x00\x00\x00\x00\xf0?\x00\x00\x00\x00\x00\x00\xf0?&\xbfX\xf2\x8b%\xef?\xb8\x1e\x85\xebQ\xb8\xee?\x96\xfcb\xc9/\x96\xec?\xe1z\x14\xaeG\xe1\xea?,\xf9\xc5\x92_,\xe9?\xe5\x17K~\xb1\xe4\xe7?\xc3\xf5(\\\x8f\xc2\xe5?\xa0\xd3\x06:m\xa0\xe3?\xde\xdd\xdd\xdd\xdd\xdd\xdd?\x9a\x99\x99\x99\x99\x99\xd9?\xc6\x92_,\xf9\xc5\xd2?\xe5\x17K~\xb1\xe4\xc7?{\x14\xaeG\xe1z\xc4?\xe5\x17K~\xb1\xe4\xb7?\xe5\x17K~\xb1\xe4\xb7?{\x14\xaeG\xe1z\xb4?{\x14\xaeG\xe1z\xb4?{\x14\xaeG\xe1z\xb4?{\x14\xaeG\xe1z\xb4?{\x14\xaeG\xe1z\xb4?{\x14\xaeG\xe1z\xb4?{\x14\xaeG\xe1z\xb4?{\x14\xaeG\xe1z\xb4?{\x14\xaeG\xe1z\xb4?{\x14\xaeG\xe1z\xb4?\x00\x00\x00\x00\x00\x00\xf0?\x93_,\xf9\xc5\x92\xef?\x93_,\xf9\xc5\x92\xef?\x93_,\xf9\xc5\x92\xef?\x93_,\xf9\xc5\x92\xef?\x93_,\xf9\xc5\x92\xef?\x93_,\xf9\xc5\x92\xef?\x93_,\xf9\xc5\x92\xef?\x93_,\xf9\xc5\x92\xef?\x93_,\xf9\xc5\x92\xef?\x93_,\xf9\xc5\x92\xef?\x93_,\xf9\xc5\x92\xef?&\xbfX\xf2\x8b%\xef?&\xbfX\xf2\x8b%\xef?&\xbfX\xf2\x8b%\xef?&\xbfX\xf2\x8b%\xef?&\xbfX\xf2\x8b%\xef?&\xbfX\xf2\x8b%\xef?&\xbfX\xf2\x8b%\xef?&\xbfX\xf2\x8b%\xef?&\xbfX\xf2\x8b%\xef?&\xbfX\xf2\x8b%\xef?&\xbfX\xf2\x8b%\xef?&\xbfX\xf2\x8b%\xef?\xb8\x1e\x85\xebQ\xb8\xee?K~\xb1\xe4\x17K\xee?K~\xb1\xe4\x17K\xee?\x00\x00\x00\x00\x00\x00\xf0?\x00\x00\x00\x00\x00\x00\xf0?\x00\x00\x00\x00\x00\x00\xf0?\x00\x00\x00\x00\x00\x00\xf0?\x00\x00\x00\x00\x00\x00\xf0?\x00\x00\x00\x00\x00\x00\xf0?\x00\x00\x00\x00\x00\x00\xf0?\x00\x00\x00\x00\x00\x00\xf0?\x00\x00\x00\x00\x00\x00\xf0?\x93_,\xf9\xc5\x92\xef?\x93_,\xf9\xc5\x92\xef?&\xbfX\xf2\x8b%\xef?&\xbfX\xf2\x8b%\xef?&\xbfX\xf2\x8b%\xef?&\xbfX\xf2\x8b%\xef?\xb8\x1e\x85\xebQ\xb8\xee?K~\xb1\xe4\x17K\xee?K~\xb1\xe4\x17K\xee?K~\xb1\xe4\x17K\xee?\xde\xdd\xdd\xdd\xdd\xdd\xed?\xde\xdd\xdd\xdd\xdd\xdd\xed?\xde\xdd\xdd\xdd\xdd\xdd\xed?K~\xb1\xe4\x17K\xee?K~\xb1\xe4\x17K\xee?\xde\xdd\xdd\xdd\xdd\xdd\xed?q=\n\xd7\xa3p\xed?q=\n\xd7\xa3p\xed?\x00\x00\x00\x00\x00\x00\xf0?\x00\x00\x00\x00\x00\x00\xf0?\x00\x00\x00\x00\x00\x00\xf0?\x00\x00\x00\x00\x00\x00\xf0?\x00\x00\x00\x00\x00\x00\xf0?\x00\x00\x00\x00\x00\x00\xf0?\x00\x00\x00\x00\x00\x00\xf0?\x00\x00\x00\x00\x00\x00\xf0?\x93_,\xf9\xc5\x92\xef?\x93_,\xf9\xc5\x92\xef?\x93_,\xf9\xc5\x92\xef?\x93_,\xf9\xc5\x92\xef?\x93_,\xf9\xc5\x92\xef?\x93_,\xf9\xc5\x92\xef?\x93_,\xf9\xc5\x92\xef?\x93_,\xf9\xc5\x92\xef?\x93_,\xf9\xc5\x92\xef?\x93_,\xf9\xc5\x92\xef?\x93_,\xf9\xc5\x92\xef?\x93_,\xf9\xc5\x92\xef?\x93_,\xf9\xc5\x92\xef?\x93_,\xf9\xc5\x92\xef?\x93_,\xf9\xc5\x92\xef?\x93_,\xf9\xc5\x92\xef?\x93_,\xf9\xc5\x92\xef?&\xbfX\xf2\x8b%\xef?&\xbfX\xf2\x8b%\xef?\x00\x00\x00\x00\x00\x00\xf0?\x00\x00\x00\x00\x00\x00\xf0?\x00\x00\x00\x00\x00\x00\xf0?\x93_,\xf9\xc5\x92\xef?&\xbfX\xf2\x8b%\xef?&\xbfX\xf2\x8b%\xef?&\xbfX\xf2\x8b%\xef?&\xbfX\xf2\x8b%\xef?\xb8\x1e\x85\xebQ\xb8\xee?\xb8\x1e\x85\xebQ\xb8\xee?\xb8\x1e\x85\xebQ\xb8\xee?\xb8\x1e\x85\xebQ\xb8\xee?\xb8\x1e\x85\xebQ\xb8\xee?\xb8\x1e\x85\xebQ\xb8\xee?&\xbfX\xf2\x8b%\xef?&\xbfX\xf2\x8b%\xef?&\xbfX\xf2\x8b%\xef?&\xbfX\xf2\x8b%\xef?&\xbfX\xf2\x8b%\xef?&\xbfX\xf2\x8b%\xef?&\xbfX\xf2\x8b%\xef?&\xbfX\xf2\x8b%\xef?&\xbfX\xf2\x8b%\xef?&\xbfX\xf2\x8b%\xef?&\xbfX\xf2\x8b%\xef?&\xbfX\xf2\x8b%\xef?&\xbfX\xf2\x8b%\xef?\x00\x00\x00\x00\x00\x00\xf0?\x00\x00\x00\x00\x00\x00\xf0?\x00\x00\x00\x00\x00\x00\xf0?\x00\x00\x00\x00\x00\x00\xf0?\x93_,\xf9\xc5\x92\xef?\x93_,\xf9\xc5\x92\xef?\xb8\x1e\x85\xebQ\xb8\xee?\xb8\x1e\x85\xebQ\xb8\xee?K~\xb1\xe4\x17K\xee?\xde\xdd\xdd\xdd\xdd\xdd\xed?\xde\xdd\xdd\xdd\xdd\xdd\xed?\xde\xdd\xdd\xdd\xdd\xdd\xed?q=\n\xd7\xa3p\xed?q=\n\xd7\xa3p\xed?q=\n\xd7\xa3p\xed?q=\n\xd7\xa3p\xed?q=\n\xd7\xa3p\xed?q=\n\xd7\xa3p\xed?q=\n\xd7\xa3p\xed?q=\n\xd7\xa3p\xed?q=\n\xd7\xa3p\xed?q=\n\xd7\xa3p\xed?q=\n\xd7\xa3p\xed?q=\n\xd7\xa3p\xed?\xde\xdd\xdd\xdd\xdd\xdd\xed?\xde\xdd\xdd\xdd\xdd\xdd\xed?\xde\xdd\xdd\xdd\xdd\xdd\xed?\x00\x00\x00\x00\x00\x00\xf0?\x93_,\xf9\xc5\x92\xef?\x93_,\xf9\xc5\x92\xef?&\xbfX\xf2\x8b%\xef?\xb8\x1e\x85\xebQ\xb8\xee?\xde\xdd\xdd\xdd\xdd\xdd\xed?\xde\xdd\xdd\xdd\xdd\xdd\xed?q=\n\xd7\xa3p\xed?q=\n\xd7\xa3p\xed?\x96\xfcb\xc9/\x96\xec?\xbc\xbb\xbb\xbb\xbb\xbb\xeb?\x07:m\xa0\xd3\x06\xea?t\xda@\xa7\rt\xea?\x07:m\xa0\xd3\x06\xea?\x9a\x99\x99\x99\x99\x99\xe9?\x9a\x99\x99\x99\x99\x99\xe9?\x9a\x99\x99\x99\x99\x99\xe9?,\xf9\xc5\x92_,\xe9?\xbfX\xf2\x8b%\xbf\xe8?\xbfX\xf2\x8b%\xbf\xe8?R\xb8\x1e\x85\xebQ\xe8?R\xb8\x1e\x85\xebQ\xe8?\xe5\x17K~\xb1\xe4\xe7?wwwwww\xe7?\n\xd7\xa3p=\n\xe7?wwwwww\xe7?wwwwww\xe7?\x00\x00\x00\x00\x00\x00\xf0?\x00\x00\x00\x00\x00\x00\xf0?\x00\x00\x00\x00\x00\x00\xf0?\xde\xdd\xdd\xdd\xdd\xdd\xed?q=\n\xd7\xa3p\xed?\x03\x9d6\xd0i\x03\xed?O\x1b\xe8\xb4\x81N\xeb?,\xf9\xc5\x92_,\xe9?R\xb8\x1e\x85\xebQ\xe8?\n\xd7\xa3p=\n\xe7?UUUUUU\xe5?\xe8\xb4\x81N\x1b\xe8\xe4?\xe8\xb4\x81N\x1b\xe8\xe4?\xc3\xf5(\\\x8f\xc2\xe5?\xc3\xf5(\\\x8f\xc2\xe5?\xc3\xf5(\\\x8f\xc2\xe5?0\x96\xfcb\xc9/\xe6?\xc3\xf5(\\\x8f\xc2\xe5?0\x96\xfcb\xc9/\xe6?0\x96\xfcb\xc9/\xe6?\x9d6\xd0i\x03\x9d\xe6?\x9d6\xd0i\x03\x9d\xe6?wwwwww\xe7?\n\xd7\xa3p=\n\xe7?\n\xd7\xa3p=\n\xe7?\x9d6\xd0i\x03\x9d\xe6?\x9d6\xd0i\x03\x9d\xe6?\x00\x00\x00\x00\x00\x00\xf0?\x93_,\xf9\xc5\x92\xef?\x93_,\xf9\xc5\x92\xef?K~\xb1\xe4\x17K\xee?\x03\x9d6\xd0i\x03\xed?\xbc\xbb\xbb\xbb\xbb\xbb\xeb?\x9a\x99\x99\x99\x99\x99\xe9?0\x96\xfcb\xc9/\xe6?333333\xe3?\xa4p=\n\xd7\xa3\xe0?)\\\x8f\xc2\xf5(\xdc?\xbfX\xf2\x8b%\xbf\xd8?\xe5\x17K~\xb1\xe4\xd7?UUUUUU\xd5?\xa0\xd3\x06:m\xa0\xd3?\x03\x9d6\xd0i\x03\xcd?\x9a\x99\x99\x99\x99\x99\xc9?\x9a\x99\x99\x99\x99\x99\xc9?\xe5\x17K~\xb1\xe4\xc7?0\x96\xfcb\xc9/\xc6?{\x14\xaeG\xe1z\xc4?{\x14\xaeG\xe1z\xc4?\x11\x11\x11\x11\x11\x11\xc1?\x11\x11\x11\x11\x11\x11\xc1?O\x1b\xe8\xb4\x81N\xbb?\xe5\x17K~\xb1\xe4\xb7?\xe5\x17K~\xb1\xe4\xb7?\x00\x00\x00\x00\x00\x00\xf0?\x93_,\xf9\xc5\x92\xef?&\xbfX\xf2\x8b%\xef?\x03\x9d6\xd0i\x03\xed?t\xda@\xa7\rt\xea?\x07:m\xa0\xd3\x06\xea?UUUUUU\xe5?\xa0\xd3\x06:m\xa0\xe3?\xa4p=\n\xd7\xa3\xe0?)\\\x8f\xc2\xf5(\xdc?\x9a\x99\x99\x99\x99\x99\xd9?0\x96\xfcb\xc9/\xd6?{\x14\xaeG\xe1z\xd4?\x11\x11\x11\x11\x11\x11\xd1?7\xd0i\x03\x9d6\xd0?\xb8\x1e\x85\xebQ\xb8\xce?\xb8\x1e\x85\xebQ\xb8\xce?\x03\x9d6\xd0i\x03\xcd?O\x1b\xe8\xb4\x81N\xcb?\x9a\x99\x99\x99\x99\x99\xc9?\xe5\x17K~\xb1\xe4\xc7?\xe5\x17K~\xb1\xe4\xc7?0\x96\xfcb\xc9/\xc6?{\x14\xaeG\xe1z\xc4?{\x14\xaeG\xe1z\xc4?\xc6\x92_,\xf9\xc5\xc2?\xc6\x92_,\xf9\xc5\xc2?\x00\x00\x00\x00\x00\x00\xf0?\x93_,\xf9\xc5\x92\xef?\xde\xdd\xdd\xdd\xdd\xdd\xed?\xe1z\x14\xaeG\xe1\xea?wwwwww\xe7?\xe8\xb4\x81N\x1b\xe8\xe4?\xecQ\xb8\x1e\x85\xeb\xe1?\x93_,\xf9\xc5\x92\xdf?\n\xd7\xa3p=\n\xd7?{\x14\xaeG\xe1z\xd4?7\xd0i\x03\x9d6\xd0?O\x1b\xe8\xb4\x81N\xcb?\xe5\x17K~\xb1\xe4\xc7?\xe5\x17K~\xb1\xe4\xc7?0\x96\xfcb\xc9/\xc6?0\x96\xfcb\xc9/\xc6?{\x14\xaeG\xe1z\xc4?{\x14\xaeG\xe1z\xc4?{\x14\xaeG\xe1z\xc4?{\x14\xaeG\xe1z\xc4?{\x14\xaeG\xe1z\xc4?{\x14\xaeG\xe1z\xc4?{\x14\xaeG\xe1z\xc4?{\x14\xaeG\xe1z\xc4?{\x14\xaeG\xe1z\xc4?\xc6\x92_,\xf9\xc5\xc2?\x11\x11\x11\x11\x11\x11\xc1?\x00\x00\x00\x00\x00\x00\xf0?\x93_,\xf9\xc5\x92\xef?\x03\x9d6\xd0i\x03\xed?O\x1b\xe8\xb4\x81N\xeb?wwwwww\xe7?Y\xf2\x8b%\xbfX\xe2?t\xda@\xa7\rt\xda?\xc6\x92_,\xf9\xc5\xd2?\x9a\x99\x99\x99\x99\x99\xc9?\x11\x11\x11\x11\x11\x11\xc1?\xb8\x1e\x85\xebQ\xb8\xbe?\xe5\x17K~\xb1\xe4\xb7?{\x14\xaeG\xe1z\xb4?{\x14\xaeG\xe1z\xb4?{\x14\xaeG\xe1z\xb4?{\x14\xaeG\xe1z\xb4?{\x14\xaeG\xe1z\xb4?{\x14\xaeG\xe1z\xb4?{\x14\xaeG\xe1z\xb4?{\x14\xaeG\xe1z\xb4?{\x14\xaeG\xe1z\xb4?{\x14\xaeG\xe1z\xb4?{\x14\xaeG\xe1z\xb4?{\x14\xaeG\xe1z\xb4?{\x14\xaeG\xe1z\xb4?{\x14\xaeG\xe1z\xb4?{\x14\xaeG\xe1z\xb4?\x00\x00\x00\x00\x00\x00\xf0?&\xbfX\xf2\x8b%\xef?\x96\xfcb\xc9/\x96\xec?wwwwww\xe7?\xecQ\xb8\x1e\x85\xeb\xe1?t\xda@\xa7\rt\xda?\xecQ\xb8\x1e\x85\xeb\xd1?{\x14\xaeG\xe1z\xc4?\xb8\x1e\x85\xebQ\xb8\xbe?\xe5\x17K~\xb1\xe4\xb7?\xe5\x17K~\xb1\xe4\xb7?{\x14\xaeG\xe1z\xb4?{\x14\xaeG\xe1z\xb4?{\x14\xaeG\xe1z\xb4?{\x14\xaeG\xe1z\xb4?{\x14\xaeG\xe1z\xb4?{\x14\xaeG\xe1z\xb4?{\x14\xaeG\xe1z\xb4?{\x14\xaeG\xe1z\xb4?{\x14\xaeG\xe1z\xb4?{\x14\xaeG\xe1z\xb4?{\x14\xaeG\xe1z\xb4?{\x14\xaeG\xe1z\xb4?{\x14\xaeG\xe1z\xb4?{\x14\xaeG\xe1z\xb4?{\x14\xaeG\xe1z\xb4?{\x14\xaeG\xe1z\xb4?\x00\x00\x00\x00\x00\x00\xf0?&\xbfX\xf2\x8b%\xef?\x03\x9d6\xd0i\x03\xed?\x07:m\xa0\xd3\x06\xea?0\x96\xfcb\xc9/\xe6?333333\xe3?\x93_,\xf9\xc5\x92\xdf?0\x96\xfcb\xc9/\xd6?\x11\x11\x11\x11\x11\x11\xd1?\x9a\x99\x99\x99\x99\x99\xc9?0\x96\xfcb\xc9/\xc6?\xb8\x1e\x85\xebQ\xb8\xbe?O\x1b\xe8\xb4\x81N\xbb?{\x14\xaeG\xe1z\xb4?{\x14\xaeG\xe1z\xb4?{\x14\xaeG\xe1z\xb4?{\x14\xaeG\xe1z\xb4?{\x14\xaeG\xe1z\xb4?{\x14\xaeG\xe1z\xb4?{\x14\xaeG\xe1z\xb4?{\x14\xaeG\xe1z\xb4?{\x14\xaeG\xe1z\xb4?{\x14\xaeG\xe1z\xb4?{\x14\xaeG\xe1z\xb4?{\x14\xaeG\xe1z\xb4?{\x14\xaeG\xe1z\xb4?{\x14\xaeG\xe1z\xb4?\x00\x00\x00\x00\x00\x00\xf0?\x00\x00\x00\x00\x00\x00\xf0?\x00\x00\x00\x00\x00\x00\xf0?\x00\x00\x00\x00\x00\x00\xf0?\x00\x00\x00\x00\x00\x00\xf0?\x00\x00\x00\x00\x00\x00\xf0?\x00\x00\x00\x00\x00\x00\xf0?\x00\x00\x00\x00\x00\x00\xf0?\x00\x00\x00\x00\x00\x00\xf0?\x00\x00\x00\x00\x00\x00\xf0?\x00\x00\x00\x00\x00\x00\xf0?\x00\x00\x00\x00\x00\x00\xf0?\x00\x00\x00\x00\x00\x00\xf0?\x00\x00\x00\x00\x00\x00\xf0?\x00\x00\x00\x00\x00\x00\xf0?\x00\x00\x00\x00\x00\x00\xf0?\x00\x00\x00\x00\x00\x00\xf0?\x00\x00\x00\x00\x00\x00\xf0?\x00\x00\x00\x00\x00\x00\xf0?\x00\x00\x00\x00\x00\x00\xf0?\x00\x00\x00\x00\x00\x00\xf0?\x00\x00\x00\x00\x00\x00\xf0?\x00\x00\x00\x00\x00\x00\xf0?\x00\x00\x00\x00\x00\x00\xf0?\x00\x00\x00\x00\x00\x00\xf0?\x00\x00\x00\x00\x00\x00\xf0?\x00\x00\x00\x00\x00\x00\xf0?\x00\x00\x00\x00\x00\x00\xf0?\x00\x00\x00\x00\x00\x00\xf0?\x00\x00\x00\x00\x00\x00\xf0?\x00\x00\x00\x00\x00\x00\xf0?\x00\x00\x00\x00\x00\x00\xf0?\x00\x00\x00\x00\x00\x00\xf0?\x00\x00\x00\x00\x00\x00\xf0?\x00\x00\x00\x00\x00\x00\xf0?\x00\x00\x00\x00\x00\x00\xf0?\x00\x00\x00\x00\x00\x00\xf0?\x00\x00\x00\x00\x00\x00\xf0?\x00\x00\x00\x00\x00\x00\xf0?\x00\x00\x00\x00\x00\x00\xf0?\x00\x00\x00\x00\x00\x00\xf0?\x00\x00\x00\x00\x00\x00\xf0?\x00\x00\x00\x00\x00\x00\xf0?\x00\x00\x00\x00\x00\x00\xf0?\x00\x00\x00\x00\x00\x00\xf0?\x00\x00\x00\x00\x00\x00\xf0?\x00\x00\x00\x00\x00\x00\xf0?\x00\x00\x00\x00\x00\x00\xf0?\x00\x00\x00\x00\x00\x00\xf0?\x00\x00\x00\x00\x00\x00\xf0?\x00\x00\x00\x00\x00\x00\xf0?\x00\x00\x00\x00\x00\x00\xf0?\x00\x00\x00\x00\x00\x00\xf0?\x00\x00\x00\x00\x00\x00\xf0?\x00\x00\x00\x00\x00\x00\xf0?\x00\x00\x00\x00\x00\x00\xf0?\x00\x00\x00\x00\x00\x00\xf0?\x00\x00\x00\x00\x00\x00\xf0?\x00\x00\x00\x00\x00\x00\xf0?\x00\x00\x00\x00\x00\x00\xf0?\x00\x00\x00\x00\x00\x00\xf0?\x00\x00\x00\x00\x00\x00\xf0?\x00\x00\x00\x00\x00\x00\xf0?\x00\x00\x00\x00\x00\x00\xf0?\x00\x00\x00\x00\x00\x00\xf0?\x00\x00\x00\x00\x00\x00\xf0?\x00\x00\x00\x00\x00\x00\xf0?\x00\x00\x00\x00\x00\x00\xf0?\x00\x00\x00\x00\x00\x00\xf0?\x00\x00\x00\x00\x00\x00\xf0?\x00\x00\x00\x00\x00\x00\xf0?\x00\x00\x00\x00\x00\x00\xf0?\x00\x00\x00\x00\x00\x00\xf0?\x00\x00\x00\x00\x00\x00\xf0?\x00\x00\x00\x00\x00\x00\xf0?\x00\x00\x00\x00\x00\x00\xf0?\x00\x00\x00\x00\x00\x00\xf0?\x00\x00\x00\x00\x00\x00\xf0?\x00\x00\x00\x00\x00\x00\xf0?\x00\x00\x00\x00\x00\x00\xf0?\x00\x00\x00\x00\x00\x00\xf0?\x00\x00\x00\x00\x00\x00\xf0?\x00\x00\x00\x00\x00\x00\xf0?\x00\x00\x00\x00\x00\x00\xf0?\x00\x00\x00\x00\x00\x00\xf0?\x00\x00\x00\x00\x00\x00\xf0?\x00\x00\x00\x00\x00\x00\xf0?\x00\x00\x00\x00\x00\x00\xf0?\x00\x00\x00\x00\x00\x00\xf0?\x00\x00\x00\x00\x00\x00\xf0?\x00\x00\x00\x00\x00\x00\xf0?\x00\x00\x00\x00\x00\x00\xf0?\x00\x00\x00\x00\x00\x00\xf0?\x00\x00\x00\x00\x00\x00\xf0?\x00\x00\x00\x00\x00\x00\xf0?\x00\x00\x00\x00\x00\x00\xf0?\x00\x00\x00\x00\x00\x00\xf0?\x00\x00\x00\x00\x00\x00\xf0?\x00\x00\x00\x00\x00\x00\xf0?\x00\x00\x00\x00\x00\x00\xf0?\x00\x00\x00\x00\x00\x00\xf0?\x00\x00\x00\x00\x00\x00\xf0?\x00\x00\x00\x00\x00\x00\xf0?\x00\x00\x00\x00\x00\x00\xf0?\x00\x00\x00\x00\x00\x00\xf0?\x00\x00\x00\x00\x00\x00\xf0?\x00\x00\x00\x00\x00\x00\xf0?\x00\x00\x00\x00\x00\x00\xf0?\x00\x00\x00\x00\x00\x00\xf0?\x00\x00\x00\x00\x00\x00\xf0?\x00\x00\x00\x00\x00\x00\xf0?\x00\x00\x00\x00\x00\x00\xf0?\x00\x00\x00\x00\x00\x00\xf0?\x00\x00\x00\x00\x00\x00\xf0?\x00\x00\x00\x00\x00\x00\xf0?\x00\x00\x00\x00\x00\x00\xf0?\x00\x00\x00\x00\x00\x00\xf0?\x00\x00\x00\x00\x00\x00\xf0?\x00\x00\x00\x00\x00\x00\xf0?\x00\x00\x00\x00\x00\x00\xf0?\x00\x00\x00\x00\x00\x00\xf0?\x00\x00\x00\x00\x00\x00\xf0?\x00\x00\x00\x00\x00\x00\xf0?\x00\x00\x00\x00\x00\x00\xf0?\x00\x00\x00\x00\x00\x00\xf0?\x00\x00\x00\x00\x00\x00\xf0?\x00\x00\x00\x00\x00\x00\xf0?\x00\x00\x00\x00\x00\x00\xf0?\x00\x00\x00\x00\x00\x00\xf0?\x00\x00\x00\x00\x00\x00\xf0?\x00\x00\x00\x00\x00\x00\xf0?\x00\x00\x00\x00\x00\x00\xf0?\x00\x00\x00\x00\x00\x00\xf0?\x00\x00\x00\x00\x00\x00\xf0?\x00\x00\x00\x00\x00\x00\xf0?\x00\x00\x00\x00\x00\x00\xf0?\x00\x00\x00\x00\x00\x00\xf0?\x00\x00\x00\x00\x00\x00\xf0?\x00\x00\x00\x00\x00\x00\xf0?\x00\x00\x00\x00\x00\x00\xf0?\x00\x00\x00\x00\x00\x00\xf0?\x00\x00\x00\x00\x00\x00\xf0?\x00\x00\x00\x00\x00\x00\xf0?\x00\x00\x00\x00\x00\x00\xf0?\x00\x00\x00\x00\x00\x00\xf0?\x00\x00\x00\x00\x00\x00\xf0?\x00\x00\x00\x00\x00\x00\xf0?\x00\x00\x00\x00\x00\x00\xf0?\x00\x00\x00\x00\x00\x00\xf0?\x00\x00\x00\x00\x00\x00\xf0?\x00\x00\x00\x00\x00\x00\xf0?\x00\x00\x00\x00\x00\x00\xf0?\x00\x00\x00\x00\x00\x00\xf0?\x00\x00\x00\x00\x00\x00\xf0?\x00\x00\x00\x00\x00\x00\xf0?\x00\x00\x00\x00\x00\x00\xf0?\x00\x00\x00\x00\x00\x00\xf0?\x00\x00\x00\x00\x00\x00\xf0?\x00\x00\x00\x00\x00\x00\xf0?\x00\x00\x00\x00\x00\x00\xf0?\x00\x00\x00\x00\x00\x00\xf0?\x00\x00\x00\x00\x00\x00\xf0?\x00\x00\x00\x00\x00\x00\xf0?\x00\x00\x00\x00\x00\x00\xf0?\x00\x00\x00\x00\x00\x00\xf0?\x00\x00\x00\x00\x00\x00\xf0?\x00\x00\x00\x00\x00\x00\xf0?\x93_,\xf9\xc5\x92\xef?\xde\xdd\xdd\xdd\xdd\xdd\xed?q=\n\xd7\xa3p\xed?\xb8\x1e\x85\xebQ\xb8\xee?&\xbfX\xf2\x8b%\xef?&\xbfX\xf2\x8b%\xef?\x93_,\xf9\xc5\x92\xef?\x93_,\xf9\xc5\x92\xef?\x93_,\xf9\xc5\x92\xef?\x93_,\xf9\xc5\x92\xef?\x93_,\xf9\xc5\x92\xef?\x93_,\xf9\xc5\x92\xef?\x93_,\xf9\xc5\x92\xef?&\xbfX\xf2\x8b%\xef?&\xbfX\xf2\x8b%\xef?&\xbfX\xf2\x8b%\xef?&\xbfX\xf2\x8b%\xef?&\xbfX\xf2\x8b%\xef?&\xbfX\xf2\x8b%\xef?&\xbfX\xf2\x8b%\xef?&\xbfX\xf2\x8b%\xef?&\xbfX\xf2\x8b%\xef?\x00\x00\x00\x00\x00\x00\xf0?\x00\x00\x00\x00\x00\x00\xf0?\x00\x00\x00\x00\x00\x00\xf0?\x00\x00\x00\x00\x00\x00\xf0?\x00\x00\x00\x00\x00\x00\xf0?\x00\x00\x00\x00\x00\x00\xf0?\x00\x00\x00\x00\x00\x00\xf0?\x00\x00\x00\x00\x00\x00\xf0?\x00\x00\x00\x00\x00\x00\xf0?\x93_,\xf9\xc5\x92\xef?&\xbfX\xf2\x8b%\xef?K~\xb1\xe4\x17K\xee?K~\xb1\xe4\x17K\xee?\x03\x9d6\xd0i\x03\xed?\x96\xfcb\xc9/\x96\xec?\xbc\xbb\xbb\xbb\xbb\xbb\xeb?O\x1b\xe8\xb4\x81N\xeb?O\x1b\xe8\xb4\x81N\xeb?t\xda@\xa7\rt\xea?\x07:m\xa0\xd3\x06\xea?R\xb8\x1e\x85\xebQ\xe8?\xe5\x17K~\xb1\xe4\xe7?wwwwww\xe7?\n\xd7\xa3p=\n\xe7?\n\xd7\xa3p=\n\xe7?\n\xd7\xa3p=\n\xe7?\n\xd7\xa3p=\n\xe7?\x00\x00\x00\x00\x00\x00\xf0?\x00\x00\x00\x00\x00\x00\xf0?\x00\x00\x00\x00\x00\x00\xf0?\x00\x00\x00\x00\x00\x00\xf0?\x00\x00\x00\x00\x00\x00\xf0?\x00\x00\x00\x00\x00\x00\xf0?\x93_,\xf9\xc5\x92\xef?\xb8\x1e\x85\xebQ\xb8\xee?K~\xb1\xe4\x17K\xee?)\\\x8f\xc2\xf5(\xec?\x9a\x99\x99\x99\x99\x99\xe9?R\xb8\x1e\x85\xebQ\xe8?\xe5\x17K~\xb1\xe4\xe7?\xe5\x17K~\xb1\xe4\xe7?\xe5\x17K~\xb1\xe4\xe7?\xe5\x17K~\xb1\xe4\xe7?\xe5\x17K~\xb1\xe4\xe7?\n\xd7\xa3p=\n\xe7?\x9d6\xd0i\x03\x9d\xe6?0\x96\xfcb\xc9/\xe6?{\x14\xaeG\xe1z\xe4?\x0et\xda@\xa7\r\xe4?\xa0\xd3\x06:m\xa0\xe3?\xa0\xd3\x06:m\xa0\xe3?333333\xe3?~\xb1\xe4\x17K~\xe1?~\xb1\xe4\x17K~\xe1?\x00\x00\x00\x00\x00\x00\xf0?\x00\x00\x00\x00\x00\x00\xf0?\x00\x00\x00\x00\x00\x00\xf0?\x00\x00\x00\x00\x00\x00\xf0?\x00\x00\x00\x00\x00\x00\xf0?\x00\x00\x00\x00\x00\x00\xf0?\x00\x00\x00\x00\x00\x00\xf0?\xb8\x1e\x85\xebQ\xb8\xee?)\\\x8f\xc2\xf5(\xec?\x9a\x99\x99\x99\x99\x99\xe9?\n\xd7\xa3p=\n\xe7?{\x14\xaeG\xe1z\xe4?\xecQ\xb8\x1e\x85\xeb\xe1?~\xb1\xe4\x17K~\xe1?\x11\x11\x11\x11\x11\x11\xe1?\x93_,\xf9\xc5\x92\xdf?\xb8\x1e\x85\xebQ\xb8\xde?\x93_,\xf9\xc5\x92\xdf?\x93_,\xf9\xc5\x92\xdf?\x93_,\xf9\xc5\x92\xdf?\xa4p=\n\xd7\xa3\xe0?\xa4p=\n\xd7\xa3\xe0?\x93_,\xf9\xc5\x92\xdf?\xa4p=\n\xd7\xa3\xe0?\xa4p=\n\xd7\xa3\xe0?\x11\x11\x11\x11\x11\x11\xe1?~\xb1\xe4\x17K~\xe1?\x00\x00\x00\x00\x00\x00\xf0?\x00\x00\x00\x00\x00\x00\xf0?\x00\x00\x00\x00\x00\x00\xf0?\x00\x00\x00\x00\x00\x00\xf0?\x00\x00\x00\x00\x00\x00\xf0?\x00\x00\x00\x00\x00\x00\xf0?\x00\x00\x00\x00\x00\x00\xf0?\x93_,\xf9\xc5\x92\xef?K~\xb1\xe4\x17K\xee?\x96\xfcb\xc9/\x96\xec?)\\\x8f\xc2\xf5(\xec?\xe5\x17K~\xb1\xe4\xe7?\xc3\xf5(\\\x8f\xc2\xe5?{\x14\xaeG\xe1z\xe4?~\xb1\xe4\x17K~\xe1?\xb8\x1e\x85\xebQ\xb8\xde?\xde\xdd\xdd\xdd\xdd\xdd\xdd?O\x1b\xe8\xb4\x81N\xdb?\xe5\x17K~\xb1\xe4\xd7?\n\xd7\xa3p=\n\xd7?\n\xd7\xa3p=\n\xd7?UUUUUU\xd5?\xa0\xd3\x06:m\xa0\xd3?\xa0\xd3\x06:m\xa0\xd3?\xc6\x92_,\xf9\xc5\xd2?\x11\x11\x11\x11\x11\x11\xd1?\x11\x11\x11\x11\x11\x11\xd1?\x00\x00\x00\x00\x00\x00\xf0?\x00\x00\x00\x00\x00\x00\xf0?\x00\x00\x00\x00\x00\x00\xf0?\x00\x00\x00\x00\x00\x00\xf0?\x00\x00\x00\x00\x00\x00\xf0?\x93_,\xf9\xc5\x92\xef?\xb8\x1e\x85\xebQ\xb8\xee?\x96\xfcb\xc9/\x96\xec?\x9a\x99\x99\x99\x99\x99\xe9?\n\xd7\xa3p=\n\xe7?{\x14\xaeG\xe1z\xe4?\x93_,\xf9\xc5\x92\xdf?\x9a\x99\x99\x99\x99\x99\xd9?{\x14\xaeG\xe1z\xd4?\xc6\x92_,\xf9\xc5\xd2?7\xd0i\x03\x9d6\xd0?\xb8\x1e\x85\xebQ\xb8\xce?O\x1b\xe8\xb4\x81N\xcb?O\x1b\xe8\xb4\x81N\xcb?\xe5\x17K~\xb1\xe4\xc7?\xe5\x17K~\xb1\xe4\xc7?{\x14\xaeG\xe1z\xc4?\xc6\x92_,\xf9\xc5\xc2?O\x1b\xe8\xb4\x81N\xbb?O\x1b\xe8\xb4\x81N\xbb?O\x1b\xe8\xb4\x81N\xbb?O\x1b\xe8\xb4\x81N\xbb?\x00\x00\x00\x00\x00\x00\xf0?\x00\x00\x00\x00\x00\x00\xf0?\x00\x00\x00\x00\x00\x00\xf0?\x00\x00\x00\x00\x00\x00\xf0?\x00\x00\x00\x00\x00\x00\xf0?\x00\x00\x00\x00\x00\x00\xf0?\x93_,\xf9\xc5\x92\xef?&\xbfX\xf2\x8b%\xef?K~\xb1\xe4\x17K\xee?K~\xb1\xe4\x17K\xee?q=\n\xd7\xa3p\xed?\xbc\xbb\xbb\xbb\xbb\xbb\xeb?,\xf9\xc5\x92_,\xe9?\n\xd7\xa3p=\n\xe7?UUUUUU\xe5?\xa0\xd3\x06:m\xa0\xe3?\xecQ\xb8\x1e\x85\xeb\xe1?\xb8\x1e\x85\xebQ\xb8\xde?)\\\x8f\xc2\xf5(\xdc?UUUUUU\xd5?\xc6\x92_,\xf9\xc5\xd2?\xb8\x1e\x85\xebQ\xb8\xce?\x03\x9d6\xd0i\x03\xcd?\x03\x9d6\xd0i\x03\xcd?\x03\x9d6\xd0i\x03\xcd?\x03\x9d6\xd0i\x03\xcd?O\x1b\xe8\xb4\x81N\xcb?\x00\x00\x00\x00\x00\x00\xf0?\x00\x00\x00\x00\x00\x00\xf0?\x00\x00\x00\x00\x00\x00\xf0?\x00\x00\x00\x00\x00\x00\xf0?\x00\x00\x00\x00\x00\x00\xf0?\x00\x00\x00\x00\x00\x00\xf0?\x00\x00\x00\x00\x00\x00\xf0?\x00\x00\x00\x00\x00\x00\xf0?\x00\x00\x00\x00\x00\x00\xf0?\x00\x00\x00\x00\x00\x00\xf0?\x00\x00\x00\x00\x00\x00\xf0?\x00\x00\x00\x00\x00\x00\xf0?\x00\x00\x00\x00\x00\x00\xf0?\x00\x00\x00\x00\x00\x00\xf0?\x00\x00\x00\x00\x00\x00\xf0?\x00\x00\x00\x00\x00\x00\xf0?\x00\x00\x00\x00\x00\x00\xf0?\x00\x00\x00\x00\x00\x00\xf0?\x00\x00\x00\x00\x00\x00\xf0?\x00\x00\x00\x00\x00\x00\xf0?\x00\x00\x00\x00\x00\x00\xf0?\x00\x00\x00\x00\x00\x00\xf0?\x00\x00\x00\x00\x00\x00\xf0?\x00\x00\x00\x00\x00\x00\xf0?\x00\x00\x00\x00\x00\x00\xf0?\x00\x00\x00\x00\x00\x00\xf0?\x00\x00\x00\x00\x00\x00\xf0?\x00\x00\x00\x00\x00\x00\xf0?\x00\x00\x00\x00\x00\x00\xf0?\x00\x00\x00\x00\x00\x00\xf0?\x00\x00\x00\x00\x00\x00\xf0?\x00\x00\x00\x00\x00\x00\xf0?\x00\x00\x00\x00\x00\x00\xf0?\x00\x00\x00\x00\x00\x00\xf0?\x00\x00\x00\x00\x00\x00\xf0?\x00\x00\x00\x00\x00\x00\xf0?\x00\x00\x00\x00\x00\x00\xf0?\x00\x00\x00\x00\x00\x00\xf0?\x00\x00\x00\x00\x00\x00\xf0?\x00\x00\x00\x00\x00\x00\xf0?\x00\x00\x00\x00\x00\x00\xf0?\x00\x00\x00\x00\x00\x00\xf0?\x00\x00\x00\x00\x00\x00\xf0?\x93_,\xf9\xc5\x92\xef?\x93_,\xf9\xc5\x92\xef?\x93_,\xf9\xc5\x92\xef?\x93_,\xf9\xc5\x92\xef?\x93_,\xf9\xc5\x92\xef?\x93_,\xf9\xc5\x92\xef?\x93_,\xf9\xc5\x92\xef?\x93_,\xf9\xc5\x92\xef?\x93_,\xf9\xc5\x92\xef?\x93_,\xf9\xc5\x92\xef?\x93_,\xf9\xc5\x92\xef?\x00\x00\x00\x00\x00\x00\xf0?\x00\x00\x00\x00\x00\x00\xf0?\x00\x00\x00\x00\x00\x00\xf0?\x00\x00\x00\x00\x00\x00\xf0?\x00\x00\x00\x00\x00\x00\xf0?\x00\x00\x00\x00\x00\x00\xf0?\x00\x00\x00\x00\x00\x00\xf0?\x00\x00\x00\x00\x00\x00\xf0?\x00\x00\x00\x00\x00\x00\xf0?\x00\x00\x00\x00\x00\x00\xf0?\x00\x00\x00\x00\x00\x00\xf0?\x00\x00\x00\x00\x00\x00\xf0?\x00\x00\x00\x00\x00\x00\xf0?\x00\x00\x00\x00\x00\x00\xf0?\x00\x00\x00\x00\x00\x00\xf0?\x00\x00\x00\x00\x00\x00\xf0?\x00\x00\x00\x00\x00\x00\xf0?\x00\x00\x00\x00\x00\x00\xf0?\x00\x00\x00\x00\x00\x00\xf0?\x00\x00\x00\x00\x00\x00\xf0?\x00\x00\x00\x00\x00\x00\xf0?\x00\x00\x00\x00\x00\x00\xf0?\x00\x00\x00\x00\x00\x00\xf0?\x00\x00\x00\x00\x00\x00\xf0?\x00\x00\x00\x00\x00\x00\xf0?\x00\x00\x00\x00\x00\x00\xf0?\x00\x00\x00\x00\x00\x00\xf0?\x00\x00\x00\x00\x00\x00\xf0?\x00\x00\x00\x00\x00\x00\xf0?\x00\x00\x00\x00\x00\x00\xf0?\x00\x00\x00\x00\x00\x00\xf0?\x00\x00\x00\x00\x00\x00\xf0?\x00\x00\x00\x00\x00\x00\xf0?\x00\x00\x00\x00\x00\x00\xf0?\x00\x00\x00\x00\x00\x00\xf0?\x00\x00\x00\x00\x00\x00\xf0?\x00\x00\x00\x00\x00\x00\xf0?\x00\x00\x00\x00\x00\x00\xf0?\x00\x00\x00\x00\x00\x00\xf0?\x00\x00\x00\x00\x00\x00\xf0?\x00\x00\x00\x00\x00\x00\xf0?\x00\x00\x00\x00\x00\x00\xf0?\x00\x00\x00\x00\x00\x00\xf0?\x00\x00\x00\x00\x00\x00\xf0?\x00\x00\x00\x00\x00\x00\xf0?\x00\x00\x00\x00\x00\x00\xf0?\x00\x00\x00\x00\x00\x00\xf0?\x00\x00\x00\x00\x00\x00\xf0?\x00\x00\x00\x00\x00\x00\xf0?\x00\x00\x00\x00\x00\x00\xf0?\x00\x00\x00\x00\x00\x00\xf0?\x00\x00\x00\x00\x00\x00\xf0?\x00\x00\x00\x00\x00\x00\xf0?\x00\x00\x00\x00\x00\x00\xf0?\x00\x00\x00\x00\x00\x00\xf0?\x00\x00\x00\x00\x00\x00\xf0?\x00\x00\x00\x00\x00\x00\xf0?\x00\x00\x00\x00\x00\x00\xf0?\x00\x00\x00\x00\x00\x00\xf0?\x00\x00\x00\x00\x00\x00\xf0?\x00\x00\x00\x00\x00\x00\xf0?\x00\x00\x00\x00\x00\x00\xf0?\x93_,\xf9\xc5\x92\xef?\x93_,\xf9\xc5\x92\xef?\x93_,\xf9\xc5\x92\xef?&\xbfX\xf2\x8b%\xef?&\xbfX\xf2\x8b%\xef?&\xbfX\xf2\x8b%\xef?&\xbfX\xf2\x8b%\xef?&\xbfX\xf2\x8b%\xef?&\xbfX\xf2\x8b%\xef?&\xbfX\xf2\x8b%\xef?&\xbfX\xf2\x8b%\xef?&\xbfX\xf2\x8b%\xef?&\xbfX\xf2\x8b%\xef?\xb8\x1e\x85\xebQ\xb8\xee?\xb8\x1e\x85\xebQ\xb8\xee?\xb8\x1e\x85\xebQ\xb8\xee?K~\xb1\xe4\x17K\xee?K~\xb1\xe4\x17K\xee?K~\xb1\xe4\x17K\xee?\x00\x00\x00\x00\x00\x00\xf0?\x00\x00\x00\x00\x00\x00\xf0?\x00\x00\x00\x00\x00\x00\xf0?\x00\x00\x00\x00\x00\x00\xf0?\x00\x00\x00\x00\x00\x00\xf0?\x00\x00\x00\x00\x00\x00\xf0?\x93_,\xf9\xc5\x92\xef?\x93_,\xf9\xc5\x92\xef?\x93_,\xf9\xc5\x92\xef?\x93_,\xf9\xc5\x92\xef?\x93_,\xf9\xc5\x92\xef?&\xbfX\xf2\x8b%\xef?&\xbfX\xf2\x8b%\xef?&\xbfX\xf2\x8b%\xef?&\xbfX\xf2\x8b%\xef?&\xbfX\xf2\x8b%\xef?&\xbfX\xf2\x8b%\xef?\xb8\x1e\x85\xebQ\xb8\xee?\xb8\x1e\x85\xebQ\xb8\xee?\xb8\x1e\x85\xebQ\xb8\xee?\xb8\x1e\x85\xebQ\xb8\xee?\xb8\x1e\x85\xebQ\xb8\xee?\xb8\x1e\x85\xebQ\xb8\xee?\xb8\x1e\x85\xebQ\xb8\xee?\xb8\x1e\x85\xebQ\xb8\xee?\xb8\x1e\x85\xebQ\xb8\xee?\xb8\x1e\x85\xebQ\xb8\xee?\x00\x00\x00\x00\x00\x00\xf0?\x00\x00\x00\x00\x00\x00\xf0?\x00\x00\x00\x00\x00\x00\xf0?\x00\x00\x00\x00\x00\x00\xf0?\x93_,\xf9\xc5\x92\xef?\x93_,\xf9\xc5\x92\xef?\x93_,\xf9\xc5\x92\xef?&\xbfX\xf2\x8b%\xef?&\xbfX\xf2\x8b%\xef?K~\xb1\xe4\x17K\xee?q=\n\xd7\xa3p\xed?q=\n\xd7\xa3p\xed?q=\n\xd7\xa3p\xed?\x96\xfcb\xc9/\x96\xec?\x96\xfcb\xc9/\x96\xec?\x96\xfcb\xc9/\x96\xec?\x96\xfcb\xc9/\x96\xec?\x96\xfcb\xc9/\x96\xec?)\\\x8f\xc2\xf5(\xec?\xe1z\x14\xaeG\xe1\xea?\xe1z\x14\xaeG\xe1\xea?\xe1z\x14\xaeG\xe1\xea?t\xda@\xa7\rt\xea?t\xda@\xa7\rt\xea?t\xda@\xa7\rt\xea?t\xda@\xa7\rt\xea?t\xda@\xa7\rt\xea?\x00\x00\x00\x00\x00\x00\xf0?\x00\x00\x00\x00\x00\x00\xf0?\x00\x00\x00\x00\x00\x00\xf0?\x00\x00\x00\x00\x00\x00\xf0?\x00\x00\x00\x00\x00\x00\xf0?\x00\x00\x00\x00\x00\x00\xf0?&\xbfX\xf2\x8b%\xef?\xb8\x1e\x85\xebQ\xb8\xee?\xde\xdd\xdd\xdd\xdd\xdd\xed?)\\\x8f\xc2\xf5(\xec?\xbc\xbb\xbb\xbb\xbb\xbb\xeb?O\x1b\xe8\xb4\x81N\xeb?\xe1z\x14\xaeG\xe1\xea?t\xda@\xa7\rt\xea?\x9a\x99\x99\x99\x99\x99\xe9?\x9a\x99\x99\x99\x99\x99\xe9?\x9a\x99\x99\x99\x99\x99\xe9?,\xf9\xc5\x92_,\xe9?R\xb8\x1e\x85\xebQ\xe8?\xe5\x17K~\xb1\xe4\xe7?\xe5\x17K~\xb1\xe4\xe7?\xe5\x17K~\xb1\xe4\xe7?\xe5\x17K~\xb1\xe4\xe7?wwwwww\xe7?\n\xd7\xa3p=\n\xe7?\n\xd7\xa3p=\n\xe7?\n\xd7\xa3p=\n\xe7?\x00\x00\x00\x00\x00\x00\xf0?\x00\x00\x00\x00\x00\x00\xf0?\x00\x00\x00\x00\x00\x00\xf0?\x00\x00\x00\x00\x00\x00\xf0?\x93_,\xf9\xc5\x92\xef?\xb8\x1e\x85\xebQ\xb8\xee?\xde\xdd\xdd\xdd\xdd\xdd\xed?q=\n\xd7\xa3p\xed?\x03\x9d6\xd0i\x03\xed?O\x1b\xe8\xb4\x81N\xeb?t\xda@\xa7\rt\xea?\x9a\x99\x99\x99\x99\x99\xe9?\x9a\x99\x99\x99\x99\x99\xe9?\xbfX\xf2\x8b%\xbf\xe8?\xe5\x17K~\xb1\xe4\xe7?\n\xd7\xa3p=\n\xe7?\n\xd7\xa3p=\n\xe7?\x9d6\xd0i\x03\x9d\xe6?UUUUUU\xe5?{\x14\xaeG\xe1z\xe4?{\x14\xaeG\xe1z\xe4?{\x14\xaeG\xe1z\xe4?{\x14\xaeG\xe1z\xe4?{\x14\xaeG\xe1z\xe4?\xa0\xd3\x06:m\xa0\xe3?\xecQ\xb8\x1e\x85\xeb\xe1?\xecQ\xb8\x1e\x85\xeb\xe1?\x00\x00\x00\x00\x00\x00\xf0?\x00\x00\x00\x00\x00\x00\xf0?\x93_,\xf9\xc5\x92\xef?\xb8\x1e\x85\xebQ\xb8\xee?\x03\x9d6\xd0i\x03\xed?\xe1z\x14\xaeG\xe1\xea?\xbfX\xf2\x8b%\xbf\xe8?\xe8\xb4\x81N\x1b\xe8\xe4?Y\xf2\x8b%\xbfX\xe2?7\xd0i\x03\x9d6\xe0?\xb8\x1e\x85\xebQ\xb8\xde?)\\\x8f\xc2\xf5(\xdc?UUUUUU\xd5?\xecQ\xb8\x1e\x85\xeb\xd1?\xb8\x1e\x85\xebQ\xb8\xce?O\x1b\xe8\xb4\x81N\xcb?O\x1b\xe8\xb4\x81N\xcb?\x9a\x99\x99\x99\x99\x99\xc9?\xe5\x17K~\xb1\xe4\xc7?\xc6\x92_,\xf9\xc5\xc2?\xc6\x92_,\xf9\xc5\xc2?\xc6\x92_,\xf9\xc5\xc2?\xc6\x92_,\xf9\xc5\xc2?\xc6\x92_,\xf9\xc5\xc2?\xc6\x92_,\xf9\xc5\xc2?\x11\x11\x11\x11\x11\x11\xc1?\xb8\x1e\x85\xebQ\xb8\xbe?\x00\x00\x00\x00\x00\x00\xf0?\x00\x00\x00\x00\x00\x00\xf0?&\xbfX\xf2\x8b%\xef?\x03\x9d6\xd0i\x03\xed?\xe1z\x14\xaeG\xe1\xea?wwwwww\xe7?\xc3\xf5(\\\x8f\xc2\xe5?333333\xe3?\xb8\x1e\x85\xebQ\xb8\xde?\x9a\x99\x99\x99\x99\x99\xd9?0\x96\xfcb\xc9/\xd6?\xc6\x92_,\xf9\xc5\xd2?O\x1b\xe8\xb4\x81N\xcb?\x9a\x99\x99\x99\x99\x99\xc9?\xc6\x92_,\xf9\xc5\xc2?\x11\x11\x11\x11\x11\x11\xc1?\x11\x11\x11\x11\x11\x11\xc1?\x11\x11\x11\x11\x11\x11\xc1?\x11\x11\x11\x11\x11\x11\xc1?\x11\x11\x11\x11\x11\x11\xc1?\x11\x11\x11\x11\x11\x11\xc1?\x11\x11\x11\x11\x11\x11\xc1?\x11\x11\x11\x11\x11\x11\xc1?\x11\x11\x11\x11\x11\x11\xc1?\x11\x11\x11\x11\x11\x11\xc1?\x11\x11\x11\x11\x11\x11\xc1?\x11\x11\x11\x11\x11\x11\xc1?\x00\x00\x00\x00\x00\x00\xf0?\x93_,\xf9\xc5\x92\xef?\xb8\x1e\x85\xebQ\xb8\xee?O\x1b\xe8\xb4\x81N\xeb?\xbfX\xf2\x8b%\xbf\xe8?\xecQ\xb8\x1e\x85\xeb\xe1?t\xda@\xa7\rt\xda?{\x14\xaeG\xe1z\xd4?\x9a\x99\x99\x99\x99\x99\xc9?\xc6\x92_,\xf9\xc5\xc2?O\x1b\xe8\xb4\x81N\xbb?\xe5\x17K~\xb1\xe4\xb7?{\x14\xaeG\xe1z\xb4?{\x14\xaeG\xe1z\xb4?{\x14\xaeG\xe1z\xb4?{\x14\xaeG\xe1z\xb4?{\x14\xaeG\xe1z\xb4?{\x14\xaeG\xe1z\xb4?{\x14\xaeG\xe1z\xb4?{\x14\xaeG\xe1z\xb4?{\x14\xaeG\xe1z\xb4?{\x14\xaeG\xe1z\xb4?{\x14\xaeG\xe1z\xb4?{\x14\xaeG\xe1z\xb4?{\x14\xaeG\xe1z\xb4?{\x14\xaeG\xe1z\xb4?{\x14\xaeG\xe1z\xb4?\x00\x00\x00\x00\x00\x00\xf0?\x93_,\xf9\xc5\x92\xef?K~\xb1\xe4\x17K\xee?\x96\xfcb\xc9/\x96\xec?\x07:m\xa0\xd3\x06\xea?\n\xd7\xa3p=\n\xe7?Y\xf2\x8b%\xbfX\xe2?\xb8\x1e\x85\xebQ\xb8\xde?\x03\x9d6\xd0i\x03\xdd?\xbfX\xf2\x8b%\xbf\xd8?\x11\x11\x11\x11\x11\x11\xd1?\xb8\x1e\x85\xebQ\xb8\xce?\x9a\x99\x99\x99\x99\x99\xc9?\xe5\x17K~\xb1\xe4\xc7?{\x14\xaeG\xe1z\xc4?\xb8\x1e\x85\xebQ\xb8\xbe?O\x1b\xe8\xb4\x81N\xbb?\xe5\x17K~\xb1\xe4\xb7?\xe5\x17K~\xb1\xe4\xb7?\xe5\x17K~\xb1\xe4\xb7?\xe5\x17K~\xb1\xe4\xb7?\xe5\x17K~\xb1\xe4\xb7?{\x14\xaeG\xe1z\xb4?{\x14\xaeG\xe1z\xb4?{\x14\xaeG\xe1z\xb4?{\x14\xaeG\xe1z\xb4?{\x14\xaeG\xe1z\xb4?\x00\x00\x00\x00\x00\x00\xf0?\x00\x00\x00\x00\x00\x00\xf0?\x00\x00\x00\x00\x00\x00\xf0?&\xbfX\xf2\x8b%\xef?&\xbfX\xf2\x8b%\xef?&\xbfX\xf2\x8b%\xef?&\xbfX\xf2\x8b%\xef?&\xbfX\xf2\x8b%\xef?&\xbfX\xf2\x8b%\xef?&\xbfX\xf2\x8b%\xef?&\xbfX\xf2\x8b%\xef?&\xbfX\xf2\x8b%\xef?&\xbfX\xf2\x8b%\xef?\xb8\x1e\x85\xebQ\xb8\xee?\xb8\x1e\x85\xebQ\xb8\xee?\xb8\x1e\x85\xebQ\xb8\xee?\xb8\x1e\x85\xebQ\xb8\xee?\xb8\x1e\x85\xebQ\xb8\xee?\xb8\x1e\x85\xebQ\xb8\xee?\xb8\x1e\x85\xebQ\xb8\xee?\xb8\x1e\x85\xebQ\xb8\xee?\xb8\x1e\x85\xebQ\xb8\xee?\xb8\x1e\x85\xebQ\xb8\xee?K~\xb1\xe4\x17K\xee?K~\xb1\xe4\x17K\xee?K~\xb1\xe4\x17K\xee?K~\xb1\xe4\x17K\xee?\x00\x00\x00\x00\x00\x00\xf0?\x00\x00\x00\x00\x00\x00\xf0?&\xbfX\xf2\x8b%\xef?&\xbfX\xf2\x8b%\xef?&\xbfX\xf2\x8b%\xef?&\xbfX\xf2\x8b%\xef?&\xbfX\xf2\x8b%\xef?\xb8\x1e\x85\xebQ\xb8\xee?\xb8\x1e\x85\xebQ\xb8\xee?K~\xb1\xe4\x17K\xee?\xb8\x1e\x85\xebQ\xb8\xee?\xb8\x1e\x85\xebQ\xb8\xee?\xb8\x1e\x85\xebQ\xb8\xee?\xb8\x1e\x85\xebQ\xb8\xee?\xb8\x1e\x85\xebQ\xb8\xee?\xb8\x1e\x85\xebQ\xb8\xee?\xb8\x1e\x85\xebQ\xb8\xee?\xb8\x1e\x85\xebQ\xb8\xee?\xb8\x1e\x85\xebQ\xb8\xee?\xb8\x1e\x85\xebQ\xb8\xee?\xb8\x1e\x85\xebQ\xb8\xee?\xb8\x1e\x85\xebQ\xb8\xee?\xb8\x1e\x85\xebQ\xb8\xee?\xb8\x1e\x85\xebQ\xb8\xee?\xb8\x1e\x85\xebQ\xb8\xee?\xb8\x1e\x85\xebQ\xb8\xee?\xb8\x1e\x85\xebQ\xb8\xee?\x00\x00\x00\x00\x00\x00\xf0?\x00\x00\x00\x00\x00\x00\xf0?\x00\x00\x00\x00\x00\x00\xf0?\x93_,\xf9\xc5\x92\xef?\x93_,\xf9\xc5\x92\xef?\x93_,\xf9\xc5\x92\xef?\x93_,\xf9\xc5\x92\xef?&\xbfX\xf2\x8b%\xef?&\xbfX\xf2\x8b%\xef?&\xbfX\xf2\x8b%\xef?&\xbfX\xf2\x8b%\xef?&\xbfX\xf2\x8b%\xef?&\xbfX\xf2\x8b%\xef?&\xbfX\xf2\x8b%\xef?\x96\xfcb\xc9/\x96\xec?\x96\xfcb\xc9/\x96\xec?\x96\xfcb\xc9/\x96\xec?\x96\xfcb\xc9/\x96\xec?\x96\xfcb\xc9/\x96\xec?\x96\xfcb\xc9/\x96\xec?\x96\xfcb\xc9/\x96\xec?\x96\xfcb\xc9/\x96\xec?\x96\xfcb\xc9/\x96\xec?\x96\xfcb\xc9/\x96\xec?\x96\xfcb\xc9/\x96\xec?\x96\xfcb\xc9/\x96\xec?\x96\xfcb\xc9/\x96\xec?\x00\x00\x00\x00\x00\x00\xf0?\x93_,\xf9\xc5\x92\xef?&\xbfX\xf2\x8b%\xef?&\xbfX\xf2\x8b%\xef?&\xbfX\xf2\x8b%\xef?&\xbfX\xf2\x8b%\xef?\xb8\x1e\x85\xebQ\xb8\xee?\xb8\x1e\x85\xebQ\xb8\xee?K~\xb1\xe4\x17K\xee?K~\xb1\xe4\x17K\xee?q=\n\xd7\xa3p\xed?\x03\x9d6\xd0i\x03\xed?\x03\x9d6\xd0i\x03\xed?\x03\x9d6\xd0i\x03\xed?\x96\xfcb\xc9/\x96\xec?\x96\xfcb\xc9/\x96\xec?\x96\xfcb\xc9/\x96\xec?\x96\xfcb\xc9/\x96\xec?)\\\x8f\xc2\xf5(\xec?\xbc\xbb\xbb\xbb\xbb\xbb\xeb?O\x1b\xe8\xb4\x81N\xeb?O\x1b\xe8\xb4\x81N\xeb?\xbc\xbb\xbb\xbb\xbb\xbb\xeb?\xbc\xbb\xbb\xbb\xbb\xbb\xeb?\xbc\xbb\xbb\xbb\xbb\xbb\xeb?\xbc\xbb\xbb\xbb\xbb\xbb\xeb?)\\\x8f\xc2\xf5(\xec?\x00\x00\x00\x00\x00\x00\xf0?\x93_,\xf9\xc5\x92\xef?&\xbfX\xf2\x8b%\xef?&\xbfX\xf2\x8b%\xef?\x96\xfcb\xc9/\x96\xec?\x96\xfcb\xc9/\x96\xec?\x96\xfcb\xc9/\x96\xec?\x96\xfcb\xc9/\x96\xec?\x96\xfcb\xc9/\x96\xec?\x96\xfcb\xc9/\x96\xec?\xbc\xbb\xbb\xbb\xbb\xbb\xeb?O\x1b\xe8\xb4\x81N\xeb?\xe1z\x14\xaeG\xe1\xea?\xe1z\x14\xaeG\xe1\xea?\xe1z\x14\xaeG\xe1\xea?t\xda@\xa7\rt\xea?t\xda@\xa7\rt\xea?t\xda@\xa7\rt\xea?t\xda@\xa7\rt\xea?\xe1z\x14\xaeG\xe1\xea?\xe1z\x14\xaeG\xe1\xea?\xe1z\x14\xaeG\xe1\xea?\xe1z\x14\xaeG\xe1\xea?t\xda@\xa7\rt\xea?t\xda@\xa7\rt\xea?t\xda@\xa7\rt\xea?t\xda@\xa7\rt\xea?\x00\x00\x00\x00\x00\x00\xf0?\x93_,\xf9\xc5\x92\xef?&\xbfX\xf2\x8b%\xef?\xb8\x1e\x85\xebQ\xb8\xee?\xb8\x1e\x85\xebQ\xb8\xee?\xb8\x1e\x85\xebQ\xb8\xee?\xb8\x1e\x85\xebQ\xb8\xee?K~\xb1\xe4\x17K\xee?q=\n\xd7\xa3p\xed?\x03\x9d6\xd0i\x03\xed?\x03\x9d6\xd0i\x03\xed?t\xda@\xa7\rt\xea?t\xda@\xa7\rt\xea?\x9a\x99\x99\x99\x99\x99\xe9?,\xf9\xc5\x92_,\xe9?R\xb8\x1e\x85\xebQ\xe8?\xe5\x17K~\xb1\xe4\xe7?wwwwww\xe7?wwwwww\xe7?wwwwww\xe7?wwwwww\xe7?wwwwww\xe7?wwwwww\xe7?wwwwww\xe7?wwwwww\xe7?wwwwww\xe7?\n\xd7\xa3p=\n\xe7?\x00\x00\x00\x00\x00\x00\xf0?\x93_,\xf9\xc5\x92\xef?K~\xb1\xe4\x17K\xee?K~\xb1\xe4\x17K\xee?q=\n\xd7\xa3p\xed?\x03\x9d6\xd0i\x03\xed?\xbc\xbb\xbb\xbb\xbb\xbb\xeb?\x9a\x99\x99\x99\x99\x99\xe9?\x9d6\xd0i\x03\x9d\xe6?\xc3\xf5(\\\x8f\xc2\xe5?\xe8\xb4\x81N\x1b\xe8\xe4?333333\xe3?\xecQ\xb8\x1e\x85\xeb\xe1?7\xd0i\x03\x9d6\xe0?\xb8\x1e\x85\xebQ\xb8\xde?\x03\x9d6\xd0i\x03\xdd?O\x1b\xe8\xb4\x81N\xdb?\x9a\x99\x99\x99\x99\x99\xd9?\x9a\x99\x99\x99\x99\x99\xd9?\x9a\x99\x99\x99\x99\x99\xd9?\x9a\x99\x99\x99\x99\x99\xd9?\xbfX\xf2\x8b%\xbf\xd8?\xe5\x17K~\xb1\xe4\xd7?\xe5\x17K~\xb1\xe4\xd7?\xe5\x17K~\xb1\xe4\xd7?\n\xd7\xa3p=\n\xd7?0\x96\xfcb\xc9/\xd6?\x00\x00\x00\x00\x00\x00\xf0?\x93_,\xf9\xc5\x92\xef?\xb8\x1e\x85\xebQ\xb8\xee?\xb8\x1e\x85\xebQ\xb8\xee?\xde\xdd\xdd\xdd\xdd\xdd\xed?q=\n\xd7\xa3p\xed?)\\\x8f\xc2\xf5(\xec?\xe1z\x14\xaeG\xe1\xea?wwwwww\xe7?\x9d6\xd0i\x03\x9d\xe6?UUUUUU\xe5?\x0et\xda@\xa7\r\xe4?333333\xe3?333333\xe3?Y\xf2\x8b%\xbfX\xe2?7\xd0i\x03\x9d6\xe0?7\xd0i\x03\x9d6\xe0?\xb8\x1e\x85\xebQ\xb8\xde?t\xda@\xa7\rt\xda?\x9a\x99\x99\x99\x99\x99\xd9?\xbfX\xf2\x8b%\xbf\xd8?\xbfX\xf2\x8b%\xbf\xd8?\n\xd7\xa3p=\n\xd7?\n\xd7\xa3p=\n\xd7?0\x96\xfcb\xc9/\xd6?UUUUUU\xd5?UUUUUU\xd5?\x00\x00\x00\x00\x00\x00\xf0?\xb8\x1e\x85\xebQ\xb8\xee?\xb8\x1e\x85\xebQ\xb8\xee?q=\n\xd7\xa3p\xed?\x03\x9d6\xd0i\x03\xed?O\x1b\xe8\xb4\x81N\xeb?wwwwww\xe7?\xc3\xf5(\\\x8f\xc2\xe5?UUUUUU\xe5?\xa0\xd3\x06:m\xa0\xe3?Y\xf2\x8b%\xbfX\xe2?\xb8\x1e\x85\xebQ\xb8\xde?\xe5\x17K~\xb1\xe4\xd7?\xa0\xd3\x06:m\xa0\xd3?\xecQ\xb8\x1e\x85\xeb\xd1?\xecQ\xb8\x1e\x85\xeb\xd1?\x9a\x99\x99\x99\x99\x99\xc9?\x9a\x99\x99\x99\x99\x99\xc9?0\x96\xfcb\xc9/\xc6?{\x14\xaeG\xe1z\xc4?\x11\x11\x11\x11\x11\x11\xc1?\x11\x11\x11\x11\x11\x11\xc1?\xb8\x1e\x85\xebQ\xb8\xbe?\xb8\x1e\x85\xebQ\xb8\xbe?\xb8\x1e\x85\xebQ\xb8\xbe?O\x1b\xe8\xb4\x81N\xbb?\xe5\x17K~\xb1\xe4\xb7?\x00\x00\x00\x00\x00\x00\xf0?\xb8\x1e\x85\xebQ\xb8\xee?\xde\xdd\xdd\xdd\xdd\xdd\xed?\x03\x9d6\xd0i\x03\xed?t\xda@\xa7\rt\xea?\x9d6\xd0i\x03\x9d\xe6?{\x14\xaeG\xe1z\xe4?\xc6\x92_,\xf9\xc5\xe2?\x93_,\xf9\xc5\x92\xdf?t\xda@\xa7\rt\xda?\xc6\x92_,\xf9\xc5\xd2?0\x96\xfcb\xc9/\xc6?{\x14\xaeG\xe1z\xc4?\xe5\x17K~\xb1\xe4\xb7?\xe5\x17K~\xb1\xe4\xb7?\xe5\x17K~\xb1\xe4\xb7?{\x14\xaeG\xe1z\xb4?O\x1b\xe8\xb4\x81N\xab?O\x1b\xe8\xb4\x81N\xab?O\x1b\xe8\xb4\x81N\xab?O\x1b\xe8\xb4\x81N\xab?{\x14\xaeG\xe1z\xa4?{\x14\xaeG\xe1z\xa4?{\x14\xaeG\xe1z\xa4?{\x14\xaeG\xe1z\xa4?{\x14\xaeG\xe1z\xa4?O\x1b\xe8\xb4\x81N\x9b?\x00\x00\x00\x00\x00\x00\xf0?\xb8\x1e\x85\xebQ\xb8\xee?q=\n\xd7\xa3p\xed?\x96\xfcb\xc9/\x96\xec?\x9d6\xd0i\x03\x9d\xe6?\xa0\xd3\x06:m\xa0\xe3?\x93_,\xf9\xc5\x92\xdf?\xbfX\xf2\x8b%\xbf\xd8?\xb8\x1e\x85\xebQ\xb8\xce?{\x14\xaeG\xe1z\xc4?\xe5\x17K~\xb1\xe4\xb7?{\x14\xaeG\xe1z\xb4?O\x1b\xe8\xb4\x81N\x9b?O\x1b\xe8\xb4\x81N\x8b?O\x1b\xe8\xb4\x81N\x8b?O\x1b\xe8\xb4\x81N\x8b?O\x1b\xe8\xb4\x81N\x8b?O\x1b\xe8\xb4\x81N\x8b?\x00\x00\x00\x00\x00\x00\x00\x00\x00\x00\x00\x00\x00\x00\x00\x00\x00\x00\x00\x00\x00\x00\x00\x00\x00\x00\x00\x00\x00\x00\x00\x00\x00\x00\x00\x00\x00\x00\x00\x00\x00\x00\x00\x00\x00\x00\x00\x00\x00\x00\x00\x00\x00\x00\x00\x00\x00\x00\x00\x00\x00\x00\x00\x00\x00\x00\x00\x00\x00\x00\x00\x00\x00\x00\x00\x00\x00\x00\xf0?\xb8\x1e\x85\xebQ\xb8\xee?q=\n\xd7\xa3p\xed?t\xda@\xa7\rt\xea?\xe5\x17K~\xb1\xe4\xe7?{\x14\xaeG\xe1z\xe4?\xecQ\xb8\x1e\x85\xeb\xe1?\xb8\x1e\x85\xebQ\xb8\xde?0\x96\xfcb\xc9/\xd6?\x11\x11\x11\x11\x11\x11\xd1?\xe5\x17K~\xb1\xe4\xc7?{\x14\xaeG\xe1z\xc4?\xc6\x92_,\xf9\xc5\xc2?\xb8\x1e\x85\xebQ\xb8\xbe?\xe5\x17K~\xb1\xe4\xb7?{\x14\xaeG\xe1z\xb4?O\x1b\xe8\xb4\x81N\xab?{\x14\xaeG\xe1z\xa4?{\x14\xaeG\xe1z\xa4?O\x1b\xe8\xb4\x81N\x9b?O\x1b\xe8\xb4\x81N\x8b?\x00\x00\x00\x00\x00\x00\x00\x00\x00\x00\x00\x00\x00\x00\x00\x00\x00\x00\x00\x00\x00\x00\x00\x00\x00\x00\x00\x00\x00\x00\x00\x00\x00\x00\x00\x00\x00\x00\x00\x00\x00\x00\x00\x00\x00\x00\x00\x00\x00\x00\x00\x00\x00\x00\xf0?&\xbfX\xf2\x8b%\xef?K~\xb1\xe4\x17K\xee?q=\n\xd7\xa3p\xed?\x9a\x99\x99\x99\x99\x99\xe9?wwwwww\xe7?\xa0\xd3\x06:m\xa0\xe3?Y\xf2\x8b%\xbfX\xe2?~\xb1\xe4\x17K~\xe1?\x03\x9d6\xd0i\x03\xdd?\xbfX\xf2\x8b%\xbf\xd8?{\x14\xaeG\xe1z\xd4?\x11\x11\x11\x11\x11\x11\xd1?\x9a\x99\x99\x99\x99\x99\xc9?\xe5\x17K~\xb1\xe4\xb7?\x11\x11\x11\x11\x11\x11\xb1?O\x1b\xe8\xb4\x81N\xab?O\x1b\xe8\xb4\x81N\x9b?O\x1b\xe8\xb4\x81N\x9b?O\x1b\xe8\xb4\x81N\x9b?O\x1b\xe8\xb4\x81N\x9b?O\x1b\xe8\xb4\x81N\x9b?O\x1b\xe8\xb4\x81N\x8b?O\x1b\xe8\xb4\x81N\x8b?O\x1b\xe8\xb4\x81N\x8b?O\x1b\xe8\xb4\x81N\x8b?O\x1b\xe8\xb4\x81N\x8b?\x00\x00\x00\x00\x00\x00\xf0?\x00\x00\x00\x00\x00\x00\xf0?\x00\x00\x00\x00\x00\x00\xf0?\x00\x00\x00\x00\x00\x00\xf0?\x00\x00\x00\x00\x00\x00\xf0?\x00\x00\x00\x00\x00\x00\xf0?\x00\x00\x00\x00\x00\x00\xf0?\x00\x00\x00\x00\x00\x00\xf0?\x00\x00\x00\x00\x00\x00\xf0?\x00\x00\x00\x00\x00\x00\xf0?\x00\x00\x00\x00\x00\x00\xf0?\x00\x00\x00\x00\x00\x00\xf0?\x00\x00\x00\x00\x00\x00\xf0?\x00\x00\x00\x00\x00\x00\xf0?\x00\x00\x00\x00\x00\x00\xf0?\x00\x00\x00\x00\x00\x00\xf0?\x00\x00\x00\x00\x00\x00\xf0?\x00\x00\x00\x00\x00\x00\xf0?\x00\x00\x00\x00\x00\x00\xf0?\x00\x00\x00\x00\x00\x00\xf0?\x00\x00\x00\x00\x00\x00\xf0?\x00\x00\x00\x00\x00\x00\xf0?\x00\x00\x00\x00\x00\x00\xf0?\x00\x00\x00\x00\x00\x00\xf0?\x00\x00\x00\x00\x00\x00\xf0?\x00\x00\x00\x00\x00\x00\xf0?\x00\x00\x00\x00\x00\x00\xf0?\x00\x00\x00\x00\x00\x00\xf0?\x00\x00\x00\x00\x00\x00\xf0?\x00\x00\x00\x00\x00\x00\xf0?\x00\x00\x00\x00\x00\x00\xf0?\x00\x00\x00\x00\x00\x00\xf0?\x00\x00\x00\x00\x00\x00\xf0?\x00\x00\x00\x00\x00\x00\xf0?\x00\x00\x00\x00\x00\x00\xf0?\x00\x00\x00\x00\x00\x00\xf0?\x00\x00\x00\x00\x00\x00\xf0?\x00\x00\x00\x00\x00\x00\xf0?\x00\x00\x00\x00\x00\x00\xf0?\x00\x00\x00\x00\x00\x00\xf0?\x00\x00\x00\x00\x00\x00\xf0?\x00\x00\x00\x00\x00\x00\xf0?\x00\x00\x00\x00\x00\x00\xf0?\x00\x00\x00\x00\x00\x00\xf0?\x00\x00\x00\x00\x00\x00\xf0?\x00\x00\x00\x00\x00\x00\xf0?\x00\x00\x00\x00\x00\x00\xf0?\x00\x00\x00\x00\x00\x00\xf0?\x00\x00\x00\x00\x00\x00\xf0?\x00\x00\x00\x00\x00\x00\xf0?\x00\x00\x00\x00\x00\x00\xf0?\x00\x00\x00\x00\x00\x00\xf0?\x00\x00\x00\x00\x00\x00\xf0?\x00\x00\x00\x00\x00\x00\xf0?\x00\x00\x00\x00\x00\x00\xf0?\x00\x00\x00\x00\x00\x00\xf0?\x00\x00\x00\x00\x00\x00\xf0?\x00\x00\x00\x00\x00\x00\xf0?\x00\x00\x00\x00\x00\x00\xf0?\x00\x00\x00\x00\x00\x00\xf0?\x00\x00\x00\x00\x00\x00\xf0?\x00\x00\x00\x00\x00\x00\xf0?\x00\x00\x00\x00\x00\x00\xf0?\x00\x00\x00\x00\x00\x00\xf0?\x00\x00\x00\x00\x00\x00\xf0?\x00\x00\x00\x00\x00\x00\xf0?\x00\x00\x00\x00\x00\x00\xf0?\x00\x00\x00\x00\x00\x00\xf0?\x00\x00\x00\x00\x00\x00\xf0?\x00\x00\x00\x00\x00\x00\xf0?\x00\x00\x00\x00\x00\x00\xf0?\x00\x00\x00\x00\x00\x00\xf0?\x00\x00\x00\x00\x00\x00\xf0?\x00\x00\x00\x00\x00\x00\xf0?\x00\x00\x00\x00\x00\x00\xf0?\x00\x00\x00\x00\x00\x00\xf0?\x00\x00\x00\x00\x00\x00\xf0?\x00\x00\x00\x00\x00\x00\xf0?\x00\x00\x00\x00\x00\x00\xf0?\x00\x00\x00\x00\x00\x00\xf0?\x00\x00\x00\x00\x00\x00\xf0?\x00\x00\x00\x00\x00\x00\xf0?\x00\x00\x00\x00\x00\x00\xf0?\x00\x00\x00\x00\x00\x00\xf0?\x00\x00\x00\x00\x00\x00\xf0?\x00\x00\x00\x00\x00\x00\xf0?\x00\x00\x00\x00\x00\x00\xf0?\x00\x00\x00\x00\x00\x00\xf0?\x00\x00\x00\x00\x00\x00\xf0?\x00\x00\x00\x00\x00\x00\xf0?\x00\x00\x00\x00\x00\x00\xf0?\x00\x00\x00\x00\x00\x00\xf0?\x00\x00\x00\x00\x00\x00\xf0?\x00\x00\x00\x00\x00\x00\xf0?\x00\x00\x00\x00\x00\x00\xf0?\x00\x00\x00\x00\x00\x00\xf0?\x00\x00\x00\x00\x00\x00\xf0?\x00\x00\x00\x00\x00\x00\xf0?\x00\x00\x00\x00\x00\x00\xf0?\x00\x00\x00\x00\x00\x00\xf0?\x00\x00\x00\x00\x00\x00\xf0?\x00\x00\x00\x00\x00\x00\xf0?\x00\x00\x00\x00\x00\x00\xf0?\x00\x00\x00\x00\x00\x00\xf0?\x00\x00\x00\x00\x00\x00\xf0?\x00\x00\x00\x00\x00\x00\xf0?\x00\x00\x00\x00\x00\x00\xf0?\x00\x00\x00\x00\x00\x00\xf0?\x00\x00\x00\x00\x00\x00\xf0?\x00\x00\x00\x00\x00\x00\xf0?\x00\x00\x00\x00\x00\x00\xf0?\x00\x00\x00\x00\x00\x00\xf0?\x00\x00\x00\x00\x00\x00\xf0?\x00\x00\x00\x00\x00\x00\xf0?\x00\x00\x00\x00\x00\x00\xf0?\x00\x00\x00\x00\x00\x00\xf0?\x00\x00\x00\x00\x00\x00\xf0?\x00\x00\x00\x00\x00\x00\xf0?\x00\x00\x00\x00\x00\x00\xf0?\x00\x00\x00\x00\x00\x00\xf0?\x00\x00\x00\x00\x00\x00\xf0?\x00\x00\x00\x00\x00\x00\xf0?\x00\x00\x00\x00\x00\x00\xf0?\x00\x00\x00\x00\x00\x00\xf0?\x00\x00\x00\x00\x00\x00\xf0?\x00\x00\x00\x00\x00\x00\xf0?\x00\x00\x00\x00\x00\x00\xf0?\x00\x00\x00\x00\x00\x00\xf0?\x00\x00\x00\x00\x00\x00\xf0?\x00\x00\x00\x00\x00\x00\xf0?\x00\x00\x00\x00\x00\x00\xf0?\x00\x00\x00\x00\x00\x00\xf0?\x00\x00\x00\x00\x00\x00\xf0?\x00\x00\x00\x00\x00\x00\xf0?\x00\x00\x00\x00\x00\x00\xf0?\x00\x00\x00\x00\x00\x00\xf0?\x00\x00\x00\x00\x00\x00\xf0?\x00\x00\x00\x00\x00\x00\xf0?\x00\x00\x00\x00\x00\x00\xf0?\x00\x00\x00\x00\x00\x00\xf0?\x00\x00\x00\x00\x00\x00\xf0?\x00\x00\x00\x00\x00\x00\xf0?\x00\x00\x00\x00\x00\x00\xf0?\x00\x00\x00\x00\x00\x00\xf0?\x00\x00\x00\x00\x00\x00\xf0?\x00\x00\x00\x00\x00\x00\xf0?\x00\x00\x00\x00\x00\x00\xf0?\x00\x00\x00\x00\x00\x00\xf0?\x00\x00\x00\x00\x00\x00\xf0?\x00\x00\x00\x00\x00\x00\xf0?\x00\x00\x00\x00\x00\x00\xf0?\x00\x00\x00\x00\x00\x00\xf0?\x00\x00\x00\x00\x00\x00\xf0?\x00\x00\x00\x00\x00\x00\xf0?\x00\x00\x00\x00\x00\x00\xf0?\x00\x00\x00\x00\x00\x00\xf0?\x00\x00\x00\x00\x00\x00\xf0?\x00\x00\x00\x00\x00\x00\xf0?\x00\x00\x00\x00\x00\x00\xf0?\x00\x00\x00\x00\x00\x00\xf0?\x00\x00\x00\x00\x00\x00\xf0?\x00\x00\x00\x00\x00\x00\xf0?\x00\x00\x00\x00\x00\x00\xf0?\x00\x00\x00\x00\x00\x00\xf0?\x00\x00\x00\x00\x00\x00\xf0?\x00\x00\x00\x00\x00\x00\xf0?\x00\x00\x00\x00\x00\x00\xf0?\x00\x00\x00\x00\x00\x00\xf0?\x00\x00\x00\x00\x00\x00\xf0?\x00\x00\x00\x00\x00\x00\xf0?\x00\x00\x00\x00\x00\x00\xf0?\x00\x00\x00\x00\x00\x00\xf0?\x00\x00\x00\x00\x00\x00\xf0?\x00\x00\x00\x00\x00\x00\xf0?\x00\x00\x00\x00\x00\x00\xf0?\x00\x00\x00\x00\x00\x00\xf0?\x00\x00\x00\x00\x00\x00\xf0?\x00\x00\x00\x00\x00\x00\xf0?\x00\x00\x00\x00\x00\x00\xf0?\x00\x00\x00\x00\x00\x00\xf0?\x00\x00\x00\x00\x00\x00\xf0?\x00\x00\x00\x00\x00\x00\xf0?\x00\x00\x00\x00\x00\x00\xf0?\x00\x00\x00\x00\x00\x00\xf0?\x00\x00\x00\x00\x00\x00\xf0?\x00\x00\x00\x00\x00\x00\xf0?\x00\x00\x00\x00\x00\x00\xf0?\x00\x00\x00\x00\x00\x00\xf0?\x00\x00\x00\x00\x00\x00\xf0?\x00\x00\x00\x00\x00\x00\xf0?\x00\x00\x00\x00\x00\x00\xf0?\x00\x00\x00\x00\x00\x00\xf0?\x00\x00\x00\x00\x00\x00\xf0?\x00\x00\x00\x00\x00\x00\xf0?\x00\x00\x00\x00\x00\x00\xf0?\x00\x00\x00\x00\x00\x00\xf0?\x00\x00\x00\x00\x00\x00\xf0?\x00\x00\x00\x00\x00\x00\xf0?\x00\x00\x00\x00\x00\x00\xf0?\x93_,\xf9\xc5\x92\xef?\x93_,\xf9\xc5\x92\xef?\x93_,\xf9\xc5\x92\xef?&\xbfX\xf2\x8b%\xef?&\xbfX\xf2\x8b%\xef?&\xbfX\xf2\x8b%\xef?\xb8\x1e\x85\xebQ\xb8\xee?\xb8\x1e\x85\xebQ\xb8\xee?\xb8\x1e\x85\xebQ\xb8\xee?\xb8\x1e\x85\xebQ\xb8\xee?\x93_,\xf9\xc5\x92\xef?\x93_,\xf9\xc5\x92\xef?\x93_,\xf9\xc5\x92\xef?\x93_,\xf9\xc5\x92\xef?\x93_,\xf9\xc5\x92\xef?\x93_,\xf9\xc5\x92\xef?\x93_,\xf9\xc5\x92\xef?\x00\x00\x00\x00\x00\x00\xf0?\x00\x00\x00\x00\x00\x00\xf0?\x00\x00\x00\x00\x00\x00\xf0?\x00\x00\x00\x00\x00\x00\xf0?\x00\x00\x00\x00\x00\x00\xf0?\x00\x00\x00\x00\x00\x00\xf0?\x00\x00\x00\x00\x00\x00\xf0?\x00\x00\x00\x00\x00\x00\xf0?\x00\x00\x00\x00\x00\x00\xf0?\x93_,\xf9\xc5\x92\xef?\xb8\x1e\x85\xebQ\xb8\xee?\xde\xdd\xdd\xdd\xdd\xdd\xed?\xbc\xbb\xbb\xbb\xbb\xbb\xeb?\x07:m\xa0\xd3\x06\xea?R\xb8\x1e\x85\xebQ\xe8?wwwwww\xe7?\xc3\xf5(\\\x8f\xc2\xe5?\xe8\xb4\x81N\x1b\xe8\xe4?\xc6\x92_,\xf9\xc5\xe2?Y\xf2\x8b%\xbfX\xe2?~\xb1\xe4\x17K~\xe1?\x11\x11\x11\x11\x11\x11\xe1?\x11\x11\x11\x11\x11\x11\xe1?7\xd0i\x03\x9d6\xe0?7\xd0i\x03\x9d6\xe0?\x93_,\xf9\xc5\x92\xdf?\xde\xdd\xdd\xdd\xdd\xdd\xdd?\x00\x00\x00\x00\x00\x00\xf0?\x00\x00\x00\x00\x00\x00\xf0?\x00\x00\x00\x00\x00\x00\xf0?\x00\x00\x00\x00\x00\x00\xf0?\x93_,\xf9\xc5\x92\xef?K~\xb1\xe4\x17K\xee?K~\xb1\xe4\x17K\xee?\xbc\xbb\xbb\xbb\xbb\xbb\xeb?\xe5\x17K~\xb1\xe4\xe7?\xa0\xd3\x06:m\xa0\xe3?\x93_,\xf9\xc5\x92\xdf?\xe5\x17K~\xb1\xe4\xd7?\xecQ\xb8\x1e\x85\xeb\xd1?\x03\x9d6\xd0i\x03\xcd?O\x1b\xe8\xb4\x81N\xcb?0\x96\xfcb\xc9/\xc6?0\x96\xfcb\xc9/\xc6?{\x14\xaeG\xe1z\xc4?\xc6\x92_,\xf9\xc5\xc2?\xc6\x92_,\xf9\xc5\xc2?\xc6\x92_,\xf9\xc5\xc2?{\x14\xaeG\xe1z\xc4?{\x14\xaeG\xe1z\xc4?{\x14\xaeG\xe1z\xc4?{\x14\xaeG\xe1z\xc4?\xc6\x92_,\xf9\xc5\xc2?\xc6\x92_,\xf9\xc5\xc2?\x00\x00\x00\x00\x00\x00\xf0?\x00\x00\x00\x00\x00\x00\xf0?\x00\x00\x00\x00\x00\x00\xf0?\x00\x00\x00\x00\x00\x00\xf0?\x00\x00\x00\x00\x00\x00\xf0?&\xbfX\xf2\x8b%\xef?\xde\xdd\xdd\xdd\xdd\xdd\xed?\x96\xfcb\xc9/\x96\xec?t\xda@\xa7\rt\xea?\xe5\x17K~\xb1\xe4\xe7?0\x96\xfcb\xc9/\xe6?~\xb1\xe4\x17K~\xe1?O\x1b\xe8\xb4\x81N\xdb?\n\xd7\xa3p=\n\xd7?7\xd0i\x03\x9d6\xd0?\xb8\x1e\x85\xebQ\xb8\xce?\x03\x9d6\xd0i\x03\xcd?0\x96\xfcb\xc9/\xc6?{\x14\xaeG\xe1z\xc4?\xb8\x1e\x85\xebQ\xb8\xbe?\xb8\x1e\x85\xebQ\xb8\xbe?O\x1b\xe8\xb4\x81N\xbb?O\x1b\xe8\xb4\x81N\xbb?\xe5\x17K~\xb1\xe4\xb7?\xe5\x17K~\xb1\xe4\xb7?\xe5\x17K~\xb1\xe4\xb7?{\x14\xaeG\xe1z\xb4?\x00\x00\x00\x00\x00\x00\xf0?\x00\x00\x00\x00\x00\x00\xf0?\x00\x00\x00\x00\x00\x00\xf0?\x93_,\xf9\xc5\x92\xef?\xb8\x1e\x85\xebQ\xb8\xee?q=\n\xd7\xa3p\xed?\xe1z\x14\xaeG\xe1\xea?,\xf9\xc5\x92_,\xe9?0\x96\xfcb\xc9/\xe6?\xecQ\xb8\x1e\x85\xeb\xe1?\xde\xdd\xdd\xdd\xdd\xdd\xdd?{\x14\xaeG\xe1z\xd4?7\xd0i\x03\x9d6\xd0?\x9a\x99\x99\x99\x99\x99\xc9?{\x14\xaeG\xe1z\xc4?\x11\x11\x11\x11\x11\x11\xc1?\x11\x11\x11\x11\x11\x11\xc1?\xb8\x1e\x85\xebQ\xb8\xbe?\xb8\x1e\x85\xebQ\xb8\xbe?O\x1b\xe8\xb4\x81N\xbb?\xe5\x17K~\xb1\xe4\xb7?{\x14\xaeG\xe1z\xb4?{\x14\xaeG\xe1z\xb4?{\x14\xaeG\xe1z\xb4?{\x14\xaeG\xe1z\xb4?{\x14\xaeG\xe1z\xb4?{\x14\xaeG\xe1z\xb4?\x00\x00\x00\x00\x00\x00\xf0?\x00\x00\x00\x00\x00\x00\xf0?\x00\x00\x00\x00\x00\x00\xf0?\x00\x00\x00\x00\x00\x00\xf0?\xb8\x1e\x85\xebQ\xb8\xee?q=\n\xd7\xa3p\xed?\xe1z\x14\xaeG\xe1\xea?\x07:m\xa0\xd3\x06\xea?,\xf9\xc5\x92_,\xe9?\n\xd7\xa3p=\n\xe7?UUUUUU\xe5?\x11\x11\x11\x11\x11\x11\xe1?\x93_,\xf9\xc5\x92\xdf?t\xda@\xa7\rt\xda?{\x14\xaeG\xe1z\xd4?O\x1b\xe8\xb4\x81N\xcb?0\x96\xfcb\xc9/\xc6?\xc6\x92_,\xf9\xc5\xc2?\xb8\x1e\x85\xebQ\xb8\xbe?O\x1b\xe8\xb4\x81N\xbb?\xe5\x17K~\xb1\xe4\xb7?{\x14\xaeG\xe1z\xb4?{\x14\xaeG\xe1z\xb4?{\x14\xaeG\xe1z\xb4?{\x14\xaeG\xe1z\xb4?{\x14\xaeG\xe1z\xb4?{\x14\xaeG\xe1z\xb4?\x00\x00\x00\x00\x00\x00\xf0?\x00\x00\x00\x00\x00\x00\xf0?\x00\x00\x00\x00\x00\x00\xf0?\x00\x00\x00\x00\x00\x00\xf0?\x00\x00\x00\x00\x00\x00\xf0?\x00\x00\x00\x00\x00\x00\xf0?\x00\x00\x00\x00\x00\x00\xf0?\x00\x00\x00\x00\x00\x00\xf0?\x00\x00\x00\x00\x00\x00\xf0?\x00\x00\x00\x00\x00\x00\xf0?\x00\x00\x00\x00\x00\x00\xf0?\x00\x00\x00\x00\x00\x00\xf0?\x00\x00\x00\x00\x00\x00\xf0?\x00\x00\x00\x00\x00\x00\xf0?\x00\x00\x00\x00\x00\x00\xf0?\x00\x00\x00\x00\x00\x00\xf0?\x00\x00\x00\x00\x00\x00\xf0?\x00\x00\x00\x00\x00\x00\xf0?\x00\x00\x00\x00\x00\x00\xf0?\x00\x00\x00\x00\x00\x00\xf0?\x00\x00\x00\x00\x00\x00\xf0?\x00\x00\x00\x00\x00\x00\xf0?\x00\x00\x00\x00\x00\x00\xf0?\x00\x00\x00\x00\x00\x00\xf0?\x00\x00\x00\x00\x00\x00\xf0?\x00\x00\x00\x00\x00\x00\xf0?\x00\x00\x00\x00\x00\x00\xf0?\x00\x00\x00\x00\x00\x00\xf0?\x00\x00\x00\x00\x00\x00\xf0?\x00\x00\x00\x00\x00\x00\xf0?\x00\x00\x00\x00\x00\x00\xf0?\x00\x00\x00\x00\x00\x00\xf0?\x00\x00\x00\x00\x00\x00\xf0?\x00\x00\x00\x00\x00\x00\xf0?\x00\x00\x00\x00\x00\x00\xf0?\x00\x00\x00\x00\x00\x00\xf0?\x00\x00\x00\x00\x00\x00\xf0?\x00\x00\x00\x00\x00\x00\xf0?\x00\x00\x00\x00\x00\x00\xf0?\x00\x00\x00\x00\x00\x00\xf0?\x00\x00\x00\x00\x00\x00\xf0?\x00\x00\x00\x00\x00\x00\xf0?\x00\x00\x00\x00\x00\x00\xf0?\x00\x00\x00\x00\x00\x00\xf0?\x00\x00\x00\x00\x00\x00\xf0?\x00\x00\x00\x00\x00\x00\xf0?\x00\x00\x00\x00\x00\x00\xf0?\x00\x00\x00\x00\x00\x00\xf0?\x00\x00\x00\x00\x00\x00\xf0?\x00\x00\x00\x00\x00\x00\xf0?\x00\x00\x00\x00\x00\x00\xf0?\x00\x00\x00\x00\x00\x00\xf0?\x00\x00\x00\x00\x00\x00\xf0?\x00\x00\x00\x00\x00\x00\xf0?\x00\x00\x00\x00\x00\x00\xf0?\x00\x00\x00\x00\x00\x00\xf0?\x00\x00\x00\x00\x00\x00\xf0?\x00\x00\x00\x00\x00\x00\xf0?\x00\x00\x00\x00\x00\x00\xf0?\x00\x00\x00\x00\x00\x00\xf0?\x00\x00\x00\x00\x00\x00\xf0?\x00\x00\x00\x00\x00\x00\xf0?\x00\x00\x00\x00\x00\x00\xf0?\x00\x00\x00\x00\x00\x00\xf0?\x00\x00\x00\x00\x00\x00\xf0?\x00\x00\x00\x00\x00\x00\xf0?\x00\x00\x00\x00\x00\x00\xf0?\x00\x00\x00\x00\x00\x00\xf0?\x00\x00\x00\x00\x00\x00\xf0?\x00\x00\x00\x00\x00\x00\xf0?\x00\x00\x00\x00\x00\x00\xf0?\x00\x00\x00\x00\x00\x00\xf0?\x00\x00\x00\x00\x00\x00\xf0?\x00\x00\x00\x00\x00\x00\xf0?\x00\x00\x00\x00\x00\x00\xf0?\x00\x00\x00\x00\x00\x00\xf0?\x00\x00\x00\x00\x00\x00\xf0?\x00\x00\x00\x00\x00\x00\xf0?\x00\x00\x00\x00\x00\x00\xf0?\x00\x00\x00\x00\x00\x00\xf0?\x00\x00\x00\x00\x00\x00\xf0?\x00\x00\x00\x00\x00\x00\xf0?\x00\x00\x00\x00\x00\x00\xf0?\x00\x00\x00\x00\x00\x00\xf0?\x00\x00\x00\x00\x00\x00\xf0?\x00\x00\x00\x00\x00\x00\xf0?\x00\x00\x00\x00\x00\x00\xf0?\x00\x00\x00\x00\x00\x00\xf0?\x00\x00\x00\x00\x00\x00\xf0?\x00\x00\x00\x00\x00\x00\xf0?\x00\x00\x00\x00\x00\x00\xf0?\x00\x00\x00\x00\x00\x00\xf0?\x00\x00\x00\x00\x00\x00\xf0?\x00\x00\x00\x00\x00\x00\xf0?\x00\x00\x00\x00\x00\x00\xf0?\x00\x00\x00\x00\x00\x00\xf0?\x00\x00\x00\x00\x00\x00\xf0?\x00\x00\x00\x00\x00\x00\xf0?\x00\x00\x00\x00\x00\x00\xf0?\x00\x00\x00\x00\x00\x00\xf0?\x00\x00\x00\x00\x00\x00\xf0?\x00\x00\x00\x00\x00\x00\xf0?\x00\x00\x00\x00\x00\x00\xf0?\x00\x00\x00\x00\x00\x00\xf0?\x00\x00\x00\x00\x00\x00\xf0?\x00\x00\x00\x00\x00\x00\xf0?\x00\x00\x00\x00\x00\x00\xf0?\x00\x00\x00\x00\x00\x00\xf0?\x00\x00\x00\x00\x00\x00\xf0?\x00\x00\x00\x00\x00\x00\xf0?\x00\x00\x00\x00\x00\x00\xf0?\x93_,\xf9\xc5\x92\xef?\x93_,\xf9\xc5\x92\xef?\x93_,\xf9\xc5\x92\xef?&\xbfX\xf2\x8b%\xef?&\xbfX\xf2\x8b%\xef?\x00\x00\x00\x00\x00\x00\xf0?\x00\x00\x00\x00\x00\x00\xf0?\x00\x00\x00\x00\x00\x00\xf0?\x00\x00\x00\x00\x00\x00\xf0?\x00\x00\x00\x00\x00\x00\xf0?\x00\x00\x00\x00\x00\x00\xf0?\x00\x00\x00\x00\x00\x00\xf0?\x00\x00\x00\x00\x00\x00\xf0?\x00\x00\x00\x00\x00\x00\xf0?\x00\x00\x00\x00\x00\x00\xf0?\x00\x00\x00\x00\x00\x00\xf0?\x00\x00\x00\x00\x00\x00\xf0?\x00\x00\x00\x00\x00\x00\xf0?\x00\x00\x00\x00\x00\x00\xf0?\x00\x00\x00\x00\x00\x00\xf0?\x00\x00\x00\x00\x00\x00\xf0?\x00\x00\x00\x00\x00\x00\xf0?\x00\x00\x00\x00\x00\x00\xf0?\x00\x00\x00\x00\x00\x00\xf0?\x00\x00\x00\x00\x00\x00\xf0?\x00\x00\x00\x00\x00\x00\xf0?\x00\x00\x00\x00\x00\x00\xf0?\x93_,\xf9\xc5\x92\xef?\x93_,\xf9\xc5\x92\xef?\xb8\x1e\x85\xebQ\xb8\xee?K~\xb1\xe4\x17K\xee?\xde\xdd\xdd\xdd\xdd\xdd\xed?q=\n\xd7\xa3p\xed?\xde\xdd\xdd\xdd\xdd\xdd\xed?K~\xb1\xe4\x17K\xee?\xb8\x1e\x85\xebQ\xb8\xee?\xb8\x1e\x85\xebQ\xb8\xee?&\xbfX\xf2\x8b%\xef?&\xbfX\xf2\x8b%\xef?&\xbfX\xf2\x8b%\xef?&\xbfX\xf2\x8b%\xef?&\xbfX\xf2\x8b%\xef?\xb8\x1e\x85\xebQ\xb8\xee?\xb8\x1e\x85\xebQ\xb8\xee?K~\xb1\xe4\x17K\xee?\xde\xdd\xdd\xdd\xdd\xdd\xed?\xde\xdd\xdd\xdd\xdd\xdd\xed?\xde\xdd\xdd\xdd\xdd\xdd\xed?\xde\xdd\xdd\xdd\xdd\xdd\xed?\xde\xdd\xdd\xdd\xdd\xdd\xed?\xde\xdd\xdd\xdd\xdd\xdd\xed?\x00\x00\x00\x00\x00\x00\xf0?\x00\x00\x00\x00\x00\x00\xf0?\x93_,\xf9\xc5\x92\xef?&\xbfX\xf2\x8b%\xef?\xb8\x1e\x85\xebQ\xb8\xee?\x03\x9d6\xd0i\x03\xed?)\\\x8f\xc2\xf5(\xec?\xbc\xbb\xbb\xbb\xbb\xbb\xeb?\x03\x9d6\xd0i\x03\xed?)\\\x8f\xc2\xf5(\xec?\x96\xfcb\xc9/\x96\xec?\xbc\xbb\xbb\xbb\xbb\xbb\xeb?\x96\xfcb\xc9/\x96\xec?\x96\xfcb\xc9/\x96\xec?\x96\xfcb\xc9/\x96\xec?O\x1b\xe8\xb4\x81N\xeb?\xe1z\x14\xaeG\xe1\xea?\x9a\x99\x99\x99\x99\x99\xe9?\n\xd7\xa3p=\n\xe7?UUUUUU\xe5?{\x14\xaeG\xe1z\xe4?\xc6\x92_,\xf9\xc5\xe2?\xecQ\xb8\x1e\x85\xeb\xe1?7\xd0i\x03\x9d6\xe0?\xb8\x1e\x85\xebQ\xb8\xde?\xb8\x1e\x85\xebQ\xb8\xde?\x03\x9d6\xd0i\x03\xdd?\x00\x00\x00\x00\x00\x00\xf0?\x00\x00\x00\x00\x00\x00\xf0?\x00\x00\x00\x00\x00\x00\xf0?\x93_,\xf9\xc5\x92\xef?\x93_,\xf9\xc5\x92\xef?\x93_,\xf9\xc5\x92\xef?&\xbfX\xf2\x8b%\xef?K~\xb1\xe4\x17K\xee?q=\n\xd7\xa3p\xed?q=\n\xd7\xa3p\xed?\x03\x9d6\xd0i\x03\xed?)\\\x8f\xc2\xf5(\xec?\xe1z\x14\xaeG\xe1\xea?O\x1b\xe8\xb4\x81N\xeb?\xbc\xbb\xbb\xbb\xbb\xbb\xeb?\xbc\xbb\xbb\xbb\xbb\xbb\xeb?\xbc\xbb\xbb\xbb\xbb\xbb\xeb?\xbc\xbb\xbb\xbb\xbb\xbb\xeb?\xbc\xbb\xbb\xbb\xbb\xbb\xeb?O\x1b\xe8\xb4\x81N\xeb?\x07:m\xa0\xd3\x06\xea?\x07:m\xa0\xd3\x06\xea?\x07:m\xa0\xd3\x06\xea?\x07:m\xa0\xd3\x06\xea?\x07:m\xa0\xd3\x06\xea?\x07:m\xa0\xd3\x06\xea?\x07:m\xa0\xd3\x06\xea?\x00\x00\x00\x00\x00\x00\xf0?\x00\x00\x00\x00\x00\x00\xf0?\x93_,\xf9\xc5\x92\xef?\x93_,\xf9\xc5\x92\xef?\xb8\x1e\x85\xebQ\xb8\xee?\xb8\x1e\x85\xebQ\xb8\xee?q=\n\xd7\xa3p\xed?\x03\x9d6\xd0i\x03\xed?)\\\x8f\xc2\xf5(\xec?t\xda@\xa7\rt\xea?\x07:m\xa0\xd3\x06\xea?\xbfX\xf2\x8b%\xbf\xe8?\x9d6\xd0i\x03\x9d\xe6?UUUUUU\xe5?\x0et\xda@\xa7\r\xe4?333333\xe3?333333\xe3?333333\xe3?333333\xe3?\xc6\x92_,\xf9\xc5\xe2?333333\xe3?Y\xf2\x8b%\xbfX\xe2?Y\xf2\x8b%\xbfX\xe2?\xc6\x92_,\xf9\xc5\xe2?\xc6\x92_,\xf9\xc5\xe2?\xc6\x92_,\xf9\xc5\xe2?\xc6\x92_,\xf9\xc5\xe2?\x00\x00\x00\x00\x00\x00\xf0?\x00\x00\x00\x00\x00\x00\xf0?\x93_,\xf9\xc5\x92\xef?\xb8\x1e\x85\xebQ\xb8\xee?\xde\xdd\xdd\xdd\xdd\xdd\xed?)\\\x8f\xc2\xf5(\xec?t\xda@\xa7\rt\xea?R\xb8\x1e\x85\xebQ\xe8?0\x96\xfcb\xc9/\xe6?\xc3\xf5(\\\x8f\xc2\xe5?{\x14\xaeG\xe1z\xe4?Y\xf2\x8b%\xbfX\xe2?7\xd0i\x03\x9d6\xe0?t\xda@\xa7\rt\xda?0\x96\xfcb\xc9/\xd6?\xc6\x92_,\xf9\xc5\xd2?7\xd0i\x03\x9d6\xd0?O\x1b\xe8\xb4\x81N\xcb?O\x1b\xe8\xb4\x81N\xcb?\xe5\x17K~\xb1\xe4\xc7?\xe5\x17K~\xb1\xe4\xc7?\xe5\x17K~\xb1\xe4\xc7?\xe5\x17K~\xb1\xe4\xc7?\xe5\x17K~\xb1\xe4\xc7?0\x96\xfcb\xc9/\xc6?{\x14\xaeG\xe1z\xc4?{\x14\xaeG\xe1z\xc4?\x00\x00\x00\x00\x00\x00\xf0?\x00\x00\x00\x00\x00\x00\xf0?&\xbfX\xf2\x8b%\xef?K~\xb1\xe4\x17K\xee?\x03\x9d6\xd0i\x03\xed?\xbc\xbb\xbb\xbb\xbb\xbb\xeb?\xe5\x17K~\xb1\xe4\xe7?UUUUUU\xe5?~\xb1\xe4\x17K~\xe1?\xb8\x1e\x85\xebQ\xb8\xde?\xbfX\xf2\x8b%\xbf\xd8?{\x14\xaeG\xe1z\xd4?\xc6\x92_,\xf9\xc5\xd2?O\x1b\xe8\xb4\x81N\xcb?\xe5\x17K~\xb1\xe4\xc7?{\x14\xaeG\xe1z\xc4?{\x14\xaeG\xe1z\xc4?\xc6\x92_,\xf9\xc5\xc2?\x11\x11\x11\x11\x11\x11\xc1?\x11\x11\x11\x11\x11\x11\xc1?\xb8\x1e\x85\xebQ\xb8\xbe?O\x1b\xe8\xb4\x81N\xbb?O\x1b\xe8\xb4\x81N\xbb?O\x1b\xe8\xb4\x81N\xbb?O\x1b\xe8\xb4\x81N\xbb?O\x1b\xe8\xb4\x81N\xbb?O\x1b\xe8\xb4\x81N\xbb?\x00\x00\x00\x00\x00\x00\xf0?\x00\x00\x00\x00\x00\x00\xf0?\xb8\x1e\x85\xebQ\xb8\xee?\xde\xdd\xdd\xdd\xdd\xdd\xed?\xbc\xbb\xbb\xbb\xbb\xbb\xeb?\xe1z\x14\xaeG\xe1\xea?R\xb8\x1e\x85\xebQ\xe8?\x9d6\xd0i\x03\x9d\xe6?\x0et\xda@\xa7\r\xe4?~\xb1\xe4\x17K~\xe1?)\\\x8f\xc2\xf5(\xdc?t\xda@\xa7\rt\xda?\x9a\x99\x99\x99\x99\x99\xd9?\n\xd7\xa3p=\n\xd7?\xecQ\xb8\x1e\x85\xeb\xd1?\xecQ\xb8\x1e\x85\xeb\xd1?\xc6\x92_,\xf9\xc5\xc2?\xc6\x92_,\xf9\xc5\xc2?\x11\x11\x11\x11\x11\x11\xc1?\x11\x11\x11\x11\x11\x11\xc1?\xb8\x1e\x85\xebQ\xb8\xbe?O\x1b\xe8\xb4\x81N\xbb?\x11\x11\x11\x11\x11\x11\xb1?O\x1b\xe8\xb4\x81N\xab?O\x1b\xe8\xb4\x81N\xab?{\x14\xaeG\xe1z\xa4?{\x14\xaeG\xe1z\xa4?\x00\x00\x00\x00\x00\x00\xf0?\x93_,\xf9\xc5\x92\xef?&\xbfX\xf2\x8b%\xef?K~\xb1\xe4\x17K\xee?q=\n\xd7\xa3p\xed?q=\n\xd7\xa3p\xed?\x96\xfcb\xc9/\x96\xec?\xbc\xbb\xbb\xbb\xbb\xbb\xeb?\x07:m\xa0\xd3\x06\xea?R\xb8\x1e\x85\xebQ\xe8?\n\xd7\xa3p=\n\xe7?\xe8\xb4\x81N\x1b\xe8\xe4?\xc6\x92_,\xf9\xc5\xe2?~\xb1\xe4\x17K~\xe1?\x93_,\xf9\xc5\x92\xdf?\x03\x9d6\xd0i\x03\xdd?)\\\x8f\xc2\xf5(\xdc?\x9a\x99\x99\x99\x99\x99\xd9?0\x96\xfcb\xc9/\xd6?\xa0\xd3\x06:m\xa0\xd3?\xc6\x92_,\xf9\xc5\xd2?\xc6\x92_,\xf9\xc5\xd2?\xc6\x92_,\xf9\xc5\xd2?\xecQ\xb8\x1e\x85\xeb\xd1?\xecQ\xb8\x1e\x85\xeb\xd1?7\xd0i\x03\x9d6\xd0?7\xd0i\x03\x9d6\xd0?\xde\xdd\xdd\xdd\xdd\xdd\xed?K~\xb1\xe4\x17K\xee?\xde\xdd\xdd\xdd\xdd\xdd\xed?\xde\xdd\xdd\xdd\xdd\xdd\xed?\xde\xdd\xdd\xdd\xdd\xdd\xed?K~\xb1\xe4\x17K\xee?K~\xb1\xe4\x17K\xee?K~\xb1\xe4\x17K\xee?\xb8\x1e\x85\xebQ\xb8\xee?&\xbfX\xf2\x8b%\xef?&\xbfX\xf2\x8b%\xef?\x93_,\xf9\xc5\x92\xef?\x93_,\xf9\xc5\x92\xef?\x93_,\xf9\xc5\x92\xef?\x00\x00\x00\x00\x00\x00\xf0?\x00\x00\x00\x00\x00\x00\xf0?\x00\x00\x00\x00\x00\x00\xf0?\x00\x00\x00\x00\x00\x00\xf0?\x00\x00\x00\x00\x00\x00\xf0?\x00\x00\x00\x00\x00\x00\xf0?\x00\x00\x00\x00\x00\x00\xf0?\x00\x00\x00\x00\x00\x00\xf0?\x00\x00\x00\x00\x00\x00\xf0?\x00\x00\x00\x00\x00\x00\xf0?\x00\x00\x00\x00\x00\x00\xf0?\x00\x00\x00\x00\x00\x00\xf0?\x00\x00\x00\x00\x00\x00\xf0?\xde\xdd\xdd\xdd\xdd\xdd\xed?\xde\xdd\xdd\xdd\xdd\xdd\xed?\xde\xdd\xdd\xdd\xdd\xdd\xed?\xde\xdd\xdd\xdd\xdd\xdd\xed?\xde\xdd\xdd\xdd\xdd\xdd\xed?K~\xb1\xe4\x17K\xee?K~\xb1\xe4\x17K\xee?\xb8\x1e\x85\xebQ\xb8\xee?&\xbfX\xf2\x8b%\xef?\x93_,\xf9\xc5\x92\xef?\x93_,\xf9\xc5\x92\xef?\x00\x00\x00\x00\x00\x00\xf0?\x00\x00\x00\x00\x00\x00\xf0?\x00\x00\x00\x00\x00\x00\xf0?\x00\x00\x00\x00\x00\x00\xf0?\x00\x00\x00\x00\x00\x00\xf0?\x00\x00\x00\x00\x00\x00\xf0?\x00\x00\x00\x00\x00\x00\xf0?\x00\x00\x00\x00\x00\x00\xf0?\x00\x00\x00\x00\x00\x00\xf0?\x00\x00\x00\x00\x00\x00\xf0?\x00\x00\x00\x00\x00\x00\xf0?\x00\x00\x00\x00\x00\x00\xf0?\x00\x00\x00\x00\x00\x00\xf0?\x00\x00\x00\x00\x00\x00\xf0?\x00\x00\x00\x00\x00\x00\xf0?\x00\x00\x00\x00\x00\x00\xf0?\xde\xdd\xdd\xdd\xdd\xdd\xed?q=\n\xd7\xa3p\xed?\xde\xdd\xdd\xdd\xdd\xdd\xed?\xde\xdd\xdd\xdd\xdd\xdd\xed?\xde\xdd\xdd\xdd\xdd\xdd\xed?\xde\xdd\xdd\xdd\xdd\xdd\xed?\xde\xdd\xdd\xdd\xdd\xdd\xed?K~\xb1\xe4\x17K\xee?\xb8\x1e\x85\xebQ\xb8\xee?K~\xb1\xe4\x17K\xee?K~\xb1\xe4\x17K\xee?&\xbfX\xf2\x8b%\xef?\x93_,\xf9\xc5\x92\xef?\x93_,\xf9\xc5\x92\xef?\x00\x00\x00\x00\x00\x00\xf0?\x00\x00\x00\x00\x00\x00\xf0?\x00\x00\x00\x00\x00\x00\xf0?\x00\x00\x00\x00\x00\x00\xf0?\x00\x00\x00\x00\x00\x00\xf0?\x00\x00\x00\x00\x00\x00\xf0?\x00\x00\x00\x00\x00\x00\xf0?\x00\x00\x00\x00\x00\x00\xf0?\x00\x00\x00\x00\x00\x00\xf0?\x00\x00\x00\x00\x00\x00\xf0?\x00\x00\x00\x00\x00\x00\xf0?\x00\x00\x00\x00\x00\x00\xf0?\x00\x00\x00\x00\x00\x00\xf0?\xde\xdd\xdd\xdd\xdd\xdd\xed?q=\n\xd7\xa3p\xed?q=\n\xd7\xa3p\xed?q=\n\xd7\xa3p\xed?\x03\x9d6\xd0i\x03\xed?\x03\x9d6\xd0i\x03\xed?q=\n\xd7\xa3p\xed?\x03\x9d6\xd0i\x03\xed?\x03\x9d6\xd0i\x03\xed?q=\n\xd7\xa3p\xed?q=\n\xd7\xa3p\xed?q=\n\xd7\xa3p\xed?q=\n\xd7\xa3p\xed?K~\xb1\xe4\x17K\xee?K~\xb1\xe4\x17K\xee?\xb8\x1e\x85\xebQ\xb8\xee?&\xbfX\xf2\x8b%\xef?&\xbfX\xf2\x8b%\xef?\x00\x00\x00\x00\x00\x00\xf0?\x00\x00\x00\x00\x00\x00\xf0?\x00\x00\x00\x00\x00\x00\xf0?\x00\x00\x00\x00\x00\x00\xf0?\x00\x00\x00\x00\x00\x00\xf0?\x00\x00\x00\x00\x00\x00\xf0?\x00\x00\x00\x00\x00\x00\xf0?\x00\x00\x00\x00\x00\x00\xf0?\x00\x00\x00\x00\x00\x00\xf0?\xde\xdd\xdd\xdd\xdd\xdd\xed?q=\n\xd7\xa3p\xed?q=\n\xd7\xa3p\xed?q=\n\xd7\xa3p\xed?\x03\x9d6\xd0i\x03\xed?\x96\xfcb\xc9/\x96\xec?\x96\xfcb\xc9/\x96\xec?q=\n\xd7\xa3p\xed?q=\n\xd7\xa3p\xed?q=\n\xd7\xa3p\xed?\x03\x9d6\xd0i\x03\xed?\x96\xfcb\xc9/\x96\xec?q=\n\xd7\xa3p\xed?q=\n\xd7\xa3p\xed?\xb8\x1e\x85\xebQ\xb8\xee?K~\xb1\xe4\x17K\xee?\xde\xdd\xdd\xdd\xdd\xdd\xed?K~\xb1\xe4\x17K\xee?K~\xb1\xe4\x17K\xee?K~\xb1\xe4\x17K\xee?&\xbfX\xf2\x8b%\xef?\x93_,\xf9\xc5\x92\xef?\x00\x00\x00\x00\x00\x00\xf0?\x00\x00\x00\x00\x00\x00\xf0?\x00\x00\x00\x00\x00\x00\xf0?\x00\x00\x00\x00\x00\x00\xf0?\x00\x00\x00\x00\x00\x00\xf0?\xde\xdd\xdd\xdd\xdd\xdd\xed?q=\n\xd7\xa3p\xed?q=\n\xd7\xa3p\xed?q=\n\xd7\xa3p\xed?q=\n\xd7\xa3p\xed?\x96\xfcb\xc9/\x96\xec?\x96\xfcb\xc9/\x96\xec?\x96\xfcb\xc9/\x96\xec?\x96\xfcb\xc9/\x96\xec?\x96\xfcb\xc9/\x96\xec?\x96\xfcb\xc9/\x96\xec?\x96\xfcb\xc9/\x96\xec?\x96\xfcb\xc9/\x96\xec?\x03\x9d6\xd0i\x03\xed?\x03\x9d6\xd0i\x03\xed?\xde\xdd\xdd\xdd\xdd\xdd\xed?K~\xb1\xe4\x17K\xee?K~\xb1\xe4\x17K\xee?\xb8\x1e\x85\xebQ\xb8\xee?&\xbfX\xf2\x8b%\xef?&\xbfX\xf2\x8b%\xef?&\xbfX\xf2\x8b%\xef?\x93_,\xf9\xc5\x92\xef?\x93_,\xf9\xc5\x92\xef?\x93_,\xf9\xc5\x92\xef?\x93_,\xf9\xc5\x92\xef?\x93_,\xf9\xc5\x92\xef?\xde\xdd\xdd\xdd\xdd\xdd\xed?q=\n\xd7\xa3p\xed?q=\n\xd7\xa3p\xed?\x03\x9d6\xd0i\x03\xed?\x96\xfcb\xc9/\x96\xec?)\\\x8f\xc2\xf5(\xec?O\x1b\xe8\xb4\x81N\xeb?\x9a\x99\x99\x99\x99\x99\xe9?wwwwww\xe7?\n\xd7\xa3p=\n\xe7?\n\xd7\xa3p=\n\xe7?\xc3\xf5(\\\x8f\xc2\xe5?UUUUUU\xe5?\xe8\xb4\x81N\x1b\xe8\xe4?{\x14\xaeG\xe1z\xe4?\xe8\xb4\x81N\x1b\xe8\xe4?{\x14\xaeG\xe1z\xe4?\x0et\xda@\xa7\r\xe4?{\x14\xaeG\xe1z\xe4?\xe8\xb4\x81N\x1b\xe8\xe4?\xe8\xb4\x81N\x1b\xe8\xe4?\xe8\xb4\x81N\x1b\xe8\xe4?0\x96\xfcb\xc9/\xe6?0\x96\xfcb\xc9/\xe6?0\x96\xfcb\xc9/\xe6?wwwwww\xe7?wwwwww\xe7?\xde\xdd\xdd\xdd\xdd\xdd\xed?q=\n\xd7\xa3p\xed?q=\n\xd7\xa3p\xed?q=\n\xd7\xa3p\xed?\x96\xfcb\xc9/\x96\xec?)\\\x8f\xc2\xf5(\xec?\xbc\xbb\xbb\xbb\xbb\xbb\xeb?t\xda@\xa7\rt\xea?R\xb8\x1e\x85\xebQ\xe8?\n\xd7\xa3p=\n\xe7?\xc3\xf5(\\\x8f\xc2\xe5?{\x14\xaeG\xe1z\xe4?333333\xe3?Y\xf2\x8b%\xbfX\xe2?\xb8\x1e\x85\xebQ\xb8\xde?\x03\x9d6\xd0i\x03\xdd?O\x1b\xe8\xb4\x81N\xdb?t\xda@\xa7\rt\xda?\x9a\x99\x99\x99\x99\x99\xd9?\x9a\x99\x99\x99\x99\x99\xd9?\xe5\x17K~\xb1\xe4\xd7?\n\xd7\xa3p=\n\xd7?UUUUUU\xd5?UUUUUU\xd5?{\x14\xaeG\xe1z\xd4?{\x14\xaeG\xe1z\xd4?{\x14\xaeG\xe1z\xd4?\xde\xdd\xdd\xdd\xdd\xdd\xed?q=\n\xd7\xa3p\xed?q=\n\xd7\xa3p\xed?\x03\x9d6\xd0i\x03\xed?\xbc\xbb\xbb\xbb\xbb\xbb\xeb?O\x1b\xe8\xb4\x81N\xeb?\x9a\x99\x99\x99\x99\x99\xe9?\n\xd7\xa3p=\n\xe7?UUUUUU\xe5?\xe8\xb4\x81N\x1b\xe8\xe4?{\x14\xaeG\xe1z\xe4?Y\xf2\x8b%\xbfX\xe2?7\xd0i\x03\x9d6\xe0?\xb8\x1e\x85\xebQ\xb8\xde?)\\\x8f\xc2\xf5(\xdc?t\xda@\xa7\rt\xda?\xe5\x17K~\xb1\xe4\xd7?UUUUUU\xd5?\xa0\xd3\x06:m\xa0\xd3?\xc6\x92_,\xf9\xc5\xd2?7\xd0i\x03\x9d6\xd0?7\xd0i\x03\x9d6\xd0?7\xd0i\x03\x9d6\xd0?\x03\x9d6\xd0i\x03\xcd?\x9a\x99\x99\x99\x99\x99\xc9?\x9a\x99\x99\x99\x99\x99\xc9?\x9a\x99\x99\x99\x99\x99\xc9?\xde\xdd\xdd\xdd\xdd\xdd\xed?q=\n\xd7\xa3p\xed?q=\n\xd7\xa3p\xed?)\\\x8f\xc2\xf5(\xec?t\xda@\xa7\rt\xea?\xe5\x17K~\xb1\xe4\xe7?UUUUUU\xe5?\xc6\x92_,\xf9\xc5\xe2?\x11\x11\x11\x11\x11\x11\xe1?t\xda@\xa7\rt\xda?UUUUUU\xd5?7\xd0i\x03\x9d6\xd0?\xe5\x17K~\xb1\xe4\xc7?{\x14\xaeG\xe1z\xc4?\x11\x11\x11\x11\x11\x11\xc1?\x11\x11\x11\x11\x11\x11\xc1?\xe5\x17K~\xb1\xe4\xb7?\xe5\x17K~\xb1\xe4\xb7?\xe5\x17K~\xb1\xe4\xb7?{\x14\xaeG\xe1z\xb4?{\x14\xaeG\xe1z\xb4?{\x14\xaeG\xe1z\xb4?{\x14\xaeG\xe1z\xb4?{\x14\xaeG\xe1z\xb4?{\x14\xaeG\xe1z\xb4?{\x14\xaeG\xe1z\xb4?{\x14\xaeG\xe1z\xb4?\xde\xdd\xdd\xdd\xdd\xdd\xed?q=\n\xd7\xa3p\xed?q=\n\xd7\xa3p\xed?q=\n\xd7\xa3p\xed?)\\\x8f\xc2\xf5(\xec?t\xda@\xa7\rt\xea?\xbfX\xf2\x8b%\xbf\xe8?wwwwww\xe7?UUUUUU\xe5?\xa0\xd3\x06:m\xa0\xe3?\x11\x11\x11\x11\x11\x11\xe1?t\xda@\xa7\rt\xda?{\x14\xaeG\xe1z\xd4?7\xd0i\x03\x9d6\xd0?O\x1b\xe8\xb4\x81N\xcb?O\x1b\xe8\xb4\x81N\xcb?\xe5\x17K~\xb1\xe4\xc7?\xe5\x17K~\xb1\xe4\xc7?0\x96\xfcb\xc9/\xc6?\x11\x11\x11\x11\x11\x11\xc1?\x11\x11\x11\x11\x11\x11\xc1?O\x1b\xe8\xb4\x81N\xbb?O\x1b\xe8\xb4\x81N\xbb?\xe5\x17K~\xb1\xe4\xb7?\xe5\x17K~\xb1\xe4\xb7?\xe5\x17K~\xb1\xe4\xb7?\xe5\x17K~\xb1\xe4\xb7?\xde\xdd\xdd\xdd\xdd\xdd\xed?q=\n\xd7\xa3p\xed?\x03\x9d6\xd0i\x03\xed?O\x1b\xe8\xb4\x81N\xeb?t\xda@\xa7\rt\xea?\xe5\x17K~\xb1\xe4\xe7?UUUUUU\xe5?\xc6\x92_,\xf9\xc5\xe2?\x93_,\xf9\xc5\x92\xdf?t\xda@\xa7\rt\xda?0\x96\xfcb\xc9/\xd6?\x11\x11\x11\x11\x11\x11\xd1?\xb8\x1e\x85\xebQ\xb8\xce?\xc6\x92_,\xf9\xc5\xc2?\xc6\x92_,\xf9\xc5\xc2?\xb8\x1e\x85\xebQ\xb8\xbe?O\x1b\xe8\xb4\x81N\xbb?\xe5\x17K~\xb1\xe4\xb7?\xe5\x17K~\xb1\xe4\xb7?\xe5\x17K~\xb1\xe4\xb7?\xe5\x17K~\xb1\xe4\xb7?\xe5\x17K~\xb1\xe4\xb7?\xe5\x17K~\xb1\xe4\xb7?\xe5\x17K~\xb1\xe4\xb7?\xe5\x17K~\xb1\xe4\xb7?\xe5\x17K~\xb1\xe4\xb7?\xe5\x17K~\xb1\xe4\xb7?\xde\xdd\xdd\xdd\xdd\xdd\xed?q=\n\xd7\xa3p\xed?q=\n\xd7\xa3p\xed?\x03\x9d6\xd0i\x03\xed?\xbc\xbb\xbb\xbb\xbb\xbb\xeb?\xbc\xbb\xbb\xbb\xbb\xbb\xeb?t\xda@\xa7\rt\xea?\n\xd7\xa3p=\n\xe7?\xc3\xf5(\\\x8f\xc2\xe5?\x0et\xda@\xa7\r\xe4?~\xb1\xe4\x17K~\xe1?\xb8\x1e\x85\xebQ\xb8\xde?t\xda@\xa7\rt\xda?\n\xd7\xa3p=\n\xd7?\xecQ\xb8\x1e\x85\xeb\xd1?\xb8\x1e\x85\xebQ\xb8\xce?0\x96\xfcb\xc9/\xc6?0\x96\xfcb\xc9/\xc6?0\x96\xfcb\xc9/\xc6?\xc6\x92_,\xf9\xc5\xc2?\xb8\x1e\x85\xebQ\xb8\xbe?\xb8\x1e\x85\xebQ\xb8\xbe?O\x1b\xe8\xb4\x81N\xbb?\xe5\x17K~\xb1\xe4\xb7?{\x14\xaeG\xe1z\xb4?{\x14\xaeG\xe1z\xb4?{\x14\xaeG\xe1z\xb4?\x00\x00\x00\x00\x00\x00\xf0?\x00\x00\x00\x00\x00\x00\xf0?\x00\x00\x00\x00\x00\x00\xf0?\x00\x00\x00\x00\x00\x00\xf0?\x00\x00\x00\x00\x00\x00\xf0?\x00\x00\x00\x00\x00\x00\xf0?\x00\x00\x00\x00\x00\x00\xf0?\x00\x00\x00\x00\x00\x00\xf0?\x00\x00\x00\x00\x00\x00\xf0?\x00\x00\x00\x00\x00\x00\xf0?\x00\x00\x00\x00\x00\x00\xf0?\x00\x00\x00\x00\x00\x00\xf0?\x00\x00\x00\x00\x00\x00\xf0?\x00\x00\x00\x00\x00\x00\xf0?\x00\x00\x00\x00\x00\x00\xf0?\x00\x00\x00\x00\x00\x00\xf0?\x00\x00\x00\x00\x00\x00\xf0?\x00\x00\x00\x00\x00\x00\xf0?\x00\x00\x00\x00\x00\x00\xf0?\x00\x00\x00\x00\x00\x00\xf0?\x00\x00\x00\x00\x00\x00\xf0?\x00\x00\x00\x00\x00\x00\xf0?\x00\x00\x00\x00\x00\x00\xf0?\x00\x00\x00\x00\x00\x00\xf0?\x00\x00\x00\x00\x00\x00\xf0?\x00\x00\x00\x00\x00\x00\xf0?\x00\x00\x00\x00\x00\x00\xf0?\x00\x00\x00\x00\x00\x00\xf0?\x00\x00\x00\x00\x00\x00\xf0?\x00\x00\x00\x00\x00\x00\xf0?\x00\x00\x00\x00\x00\x00\xf0?\x00\x00\x00\x00\x00\x00\xf0?\x00\x00\x00\x00\x00\x00\xf0?\x00\x00\x00\x00\x00\x00\xf0?\x00\x00\x00\x00\x00\x00\xf0?\x00\x00\x00\x00\x00\x00\xf0?\x00\x00\x00\x00\x00\x00\xf0?\x00\x00\x00\x00\x00\x00\xf0?\x00\x00\x00\x00\x00\x00\xf0?\x00\x00\x00\x00\x00\x00\xf0?\x00\x00\x00\x00\x00\x00\xf0?\x00\x00\x00\x00\x00\x00\xf0?\x00\x00\x00\x00\x00\x00\xf0?\x00\x00\x00\x00\x00\x00\xf0?\x00\x00\x00\x00\x00\x00\xf0?\x00\x00\x00\x00\x00\x00\xf0?\x00\x00\x00\x00\x00\x00\xf0?\x00\x00\x00\x00\x00\x00\xf0?\x00\x00\x00\x00\x00\x00\xf0?\x00\x00\x00\x00\x00\x00\xf0?\x00\x00\x00\x00\x00\x00\xf0?\x00\x00\x00\x00\x00\x00\xf0?\x00\x00\x00\x00\x00\x00\xf0?\x00\x00\x00\x00\x00\x00\xf0?\x00\x00\x00\x00\x00\x00\xf0?\x00\x00\x00\x00\x00\x00\xf0?\x00\x00\x00\x00\x00\x00\xf0?\x00\x00\x00\x00\x00\x00\xf0?\x00\x00\x00\x00\x00\x00\xf0?\x00\x00\x00\x00\x00\x00\xf0?\x00\x00\x00\x00\x00\x00\xf0?\x00\x00\x00\x00\x00\x00\xf0?\x00\x00\x00\x00\x00\x00\xf0?\x00\x00\x00\x00\x00\x00\xf0?\x00\x00\x00\x00\x00\x00\xf0?\x00\x00\x00\x00\x00\x00\xf0?\x00\x00\x00\x00\x00\x00\xf0?\x00\x00\x00\x00\x00\x00\xf0?\x00\x00\x00\x00\x00\x00\xf0?\x00\x00\x00\x00\x00\x00\xf0?\x00\x00\x00\x00\x00\x00\xf0?\x00\x00\x00\x00\x00\x00\xf0?\x00\x00\x00\x00\x00\x00\xf0?\x00\x00\x00\x00\x00\x00\xf0?\x00\x00\x00\x00\x00\x00\xf0?\x00\x00\x00\x00\x00\x00\xf0?\x00\x00\x00\x00\x00\x00\xf0?\x00\x00\x00\x00\x00\x00\xf0?\x00\x00\x00\x00\x00\x00\xf0?\x00\x00\x00\x00\x00\x00\xf0?\x00\x00\x00\x00\x00\x00\xf0?\x00\x00\x00\x00\x00\x00\xf0?\x00\x00\x00\x00\x00\x00\xf0?\x93_,\xf9\xc5\x92\xef?\x93_,\xf9\xc5\x92\xef?&\xbfX\xf2\x8b%\xef?\xb8\x1e\x85\xebQ\xb8\xee?\xb8\x1e\x85\xebQ\xb8\xee?\xb8\x1e\x85\xebQ\xb8\xee?K~\xb1\xe4\x17K\xee?&\xbfX\xf2\x8b%\xef?\x00\x00\x00\x00\x00\x00\xf0?\x00\x00\x00\x00\x00\x00\xf0?\x00\x00\x00\x00\x00\x00\xf0?\x00\x00\x00\x00\x00\x00\xf0?\x00\x00\x00\x00\x00\x00\xf0?\x00\x00\x00\x00\x00\x00\xf0?\x00\x00\x00\x00\x00\x00\xf0?\x00\x00\x00\x00\x00\x00\xf0?\x00\x00\x00\x00\x00\x00\xf0?\x00\x00\x00\x00\x00\x00\xf0?\x00\x00\x00\x00\x00\x00\xf0?\x00\x00\x00\x00\x00\x00\xf0?\x00\x00\x00\x00\x00\x00\xf0?\x00\x00\x00\x00\x00\x00\xf0?\x00\x00\x00\x00\x00\x00\xf0?\x00\x00\x00\x00\x00\x00\xf0?\x00\x00\x00\x00\x00\x00\xf0?\x00\x00\x00\x00\x00\x00\xf0?\x00\x00\x00\x00\x00\x00\xf0?\x93_,\xf9\xc5\x92\xef?\x93_,\xf9\xc5\x92\xef?\x93_,\xf9\xc5\x92\xef?\x93_,\xf9\xc5\x92\xef?&\xbfX\xf2\x8b%\xef?&\xbfX\xf2\x8b%\xef?\x93_,\xf9\xc5\x92\xef?\x93_,\xf9\xc5\x92\xef?\x93_,\xf9\xc5\x92\xef?\x00\x00\x00\x00\x00\x00\xf0?\x00\x00\x00\x00\x00\x00\xf0?\x00\x00\x00\x00\x00\x00\xf0?\x00\x00\x00\x00\x00\x00\xf0?\x00\x00\x00\x00\x00\x00\xf0?\x00\x00\x00\x00\x00\x00\xf0?\x00\x00\x00\x00\x00\x00\xf0?\x00\x00\x00\x00\x00\x00\xf0?\x00\x00\x00\x00\x00\x00\xf0?\x00\x00\x00\x00\x00\x00\xf0?\x00\x00\x00\x00\x00\x00\xf0?\x00\x00\x00\x00\x00\x00\xf0?\x00\x00\x00\x00\x00\x00\xf0?\x00\x00\x00\x00\x00\x00\xf0?\x00\x00\x00\x00\x00\x00\xf0?\x00\x00\x00\x00\x00\x00\xf0?\x00\x00\x00\x00\x00\x00\xf0?\x00\x00\x00\x00\x00\x00\xf0?\x93_,\xf9\xc5\x92\xef?\x93_,\xf9\xc5\x92\xef?&\xbfX\xf2\x8b%\xef?\xb8\x1e\x85\xebQ\xb8\xee?\xb8\x1e\x85\xebQ\xb8\xee?\x03\x9d6\xd0i\x03\xed?\x96\xfcb\xc9/\x96\xec?\xe1z\x14\xaeG\xe1\xea?\xbc\xbb\xbb\xbb\xbb\xbb\xeb?\xde\xdd\xdd\xdd\xdd\xdd\xed?\xde\xdd\xdd\xdd\xdd\xdd\xed?q=\n\xd7\xa3p\xed?K~\xb1\xe4\x17K\xee?K~\xb1\xe4\x17K\xee?K~\xb1\xe4\x17K\xee?K~\xb1\xe4\x17K\xee?K~\xb1\xe4\x17K\xee?\xb8\x1e\x85\xebQ\xb8\xee?&\xbfX\xf2\x8b%\xef?&\xbfX\xf2\x8b%\xef?&\xbfX\xf2\x8b%\xef?&\xbfX\xf2\x8b%\xef?&\xbfX\xf2\x8b%\xef?&\xbfX\xf2\x8b%\xef?\x93_,\xf9\xc5\x92\xef?\x00\x00\x00\x00\x00\x00\xf0?\x93_,\xf9\xc5\x92\xef?\x93_,\xf9\xc5\x92\xef?\x93_,\xf9\xc5\x92\xef?\xb8\x1e\x85\xebQ\xb8\xee?K~\xb1\xe4\x17K\xee?\xbc\xbb\xbb\xbb\xbb\xbb\xeb?\x9a\x99\x99\x99\x99\x99\xe9?0\x96\xfcb\xc9/\xe6?Y\xf2\x8b%\xbfX\xe2?\xc6\x92_,\xf9\xc5\xe2?\x11\x11\x11\x11\x11\x11\xe1?\x11\x11\x11\x11\x11\x11\xe1?\x0et\xda@\xa7\r\xe4?\x9d6\xd0i\x03\x9d\xe6?R\xb8\x1e\x85\xebQ\xe8?\xbfX\xf2\x8b%\xbf\xe8?\x9a\x99\x99\x99\x99\x99\xe9?\xe1z\x14\xaeG\xe1\xea?O\x1b\xe8\xb4\x81N\xeb?\x96\xfcb\xc9/\x96\xec?q=\n\xd7\xa3p\xed?K~\xb1\xe4\x17K\xee?&\xbfX\xf2\x8b%\xef?&\xbfX\xf2\x8b%\xef?\x93_,\xf9\xc5\x92\xef?\x93_,\xf9\xc5\x92\xef?\x00\x00\x00\x00\x00\x00\xf0?\x00\x00\x00\x00\x00\x00\xf0?\x93_,\xf9\xc5\x92\xef?\x93_,\xf9\xc5\x92\xef?&\xbfX\xf2\x8b%\xef?\xb8\x1e\x85\xebQ\xb8\xee?K~\xb1\xe4\x17K\xee?q=\n\xd7\xa3p\xed?\x03\x9d6\xd0i\x03\xed?O\x1b\xe8\xb4\x81N\xeb?O\x1b\xe8\xb4\x81N\xeb?\xe1z\x14\xaeG\xe1\xea?\x9a\x99\x99\x99\x99\x99\xe9?\x9a\x99\x99\x99\x99\x99\xe9?,\xf9\xc5\x92_,\xe9?\n\xd7\xa3p=\n\xe7?\x9d6\xd0i\x03\x9d\xe6?\n\xd7\xa3p=\n\xe7?\x9d6\xd0i\x03\x9d\xe6?\x9d6\xd0i\x03\x9d\xe6?\x9d6\xd0i\x03\x9d\xe6?\xc3\xf5(\\\x8f\xc2\xe5?\xc3\xf5(\\\x8f\xc2\xe5?\xe8\xb4\x81N\x1b\xe8\xe4?{\x14\xaeG\xe1z\xe4?{\x14\xaeG\xe1z\xe4?{\x14\xaeG\xe1z\xe4?\x00\x00\x00\x00\x00\x00\xf0?\x00\x00\x00\x00\x00\x00\xf0?\x93_,\xf9\xc5\x92\xef?\x93_,\xf9\xc5\x92\xef?\x93_,\xf9\xc5\x92\xef?\xb8\x1e\x85\xebQ\xb8\xee?\xde\xdd\xdd\xdd\xdd\xdd\xed?q=\n\xd7\xa3p\xed?O\x1b\xe8\xb4\x81N\xeb?t\xda@\xa7\rt\xea?\x9d6\xd0i\x03\x9d\xe6?\xa0\xd3\x06:m\xa0\xe3?7\xd0i\x03\x9d6\xe0?\xbfX\xf2\x8b%\xbf\xd8?0\x96\xfcb\xc9/\xd6?{\x14\xaeG\xe1z\xd4?\xecQ\xb8\x1e\x85\xeb\xd1?\x11\x11\x11\x11\x11\x11\xd1?7\xd0i\x03\x9d6\xd0?\xecQ\xb8\x1e\x85\xeb\xd1?7\xd0i\x03\x9d6\xd0?O\x1b\xe8\xb4\x81N\xcb?\x9a\x99\x99\x99\x99\x99\xc9?\xe5\x17K~\xb1\xe4\xc7?0\x96\xfcb\xc9/\xc6?0\x96\xfcb\xc9/\xc6?0\x96\xfcb\xc9/\xc6?\x00\x00\x00\x00\x00\x00\xf0?\x93_,\xf9\xc5\x92\xef?\x93_,\xf9\xc5\x92\xef?\x93_,\xf9\xc5\x92\xef?K~\xb1\xe4\x17K\xee?q=\n\xd7\xa3p\xed?\x96\xfcb\xc9/\x96\xec?\xe1z\x14\xaeG\xe1\xea?,\xf9\xc5\x92_,\xe9?UUUUUU\xe5?~\xb1\xe4\x17K~\xe1?\x9a\x99\x99\x99\x99\x99\xd9?\xc6\x92_,\xf9\xc5\xd2?\x9a\x99\x99\x99\x99\x99\xc9?0\x96\xfcb\xc9/\xc6?\xb8\x1e\x85\xebQ\xb8\xbe?\xb8\x1e\x85\xebQ\xb8\xbe?\xb8\x1e\x85\xebQ\xb8\xbe?\xb8\x1e\x85\xebQ\xb8\xbe?\xb8\x1e\x85\xebQ\xb8\xbe?O\x1b\xe8\xb4\x81N\xbb?O\x1b\xe8\xb4\x81N\xbb?O\x1b\xe8\xb4\x81N\xbb?O\x1b\xe8\xb4\x81N\xbb?O\x1b\xe8\xb4\x81N\xbb?\xe5\x17K~\xb1\xe4\xb7?\xe5\x17K~\xb1\xe4\xb7?\x00\x00\x00\x00\x00\x00\xf0?\x93_,\xf9\xc5\x92\xef?\x93_,\xf9\xc5\x92\xef?&\xbfX\xf2\x8b%\xef?K~\xb1\xe4\x17K\xee?\x03\x9d6\xd0i\x03\xed?)\\\x8f\xc2\xf5(\xec?)\\\x8f\xc2\xf5(\xec?\x07:m\xa0\xd3\x06\xea?wwwwww\xe7?\xa4p=\n\xd7\xa3\xe0?\xde\xdd\xdd\xdd\xdd\xdd\xdd?\xe5\x17K~\xb1\xe4\xd7?\xecQ\xb8\x1e\x85\xeb\xd1?7\xd0i\x03\x9d6\xd0?\x9a\x99\x99\x99\x99\x99\xc9?{\x14\xaeG\xe1z\xc4?\x11\x11\x11\x11\x11\x11\xc1?\xb8\x1e\x85\xebQ\xb8\xbe?O\x1b\xe8\xb4\x81N\xbb?O\x1b\xe8\xb4\x81N\xbb?O\x1b\xe8\xb4\x81N\xbb?\xe5\x17K~\xb1\xe4\xb7?\xe5\x17K~\xb1\xe4\xb7?\xe5\x17K~\xb1\xe4\xb7?\xe5\x17K~\xb1\xe4\xb7?\xe5\x17K~\xb1\xe4\xb7?\x00\x00\x00\x00\x00\x00\xf0?\x93_,\xf9\xc5\x92\xef?\x93_,\xf9\xc5\x92\xef?&\xbfX\xf2\x8b%\xef?\x03\x9d6\xd0i\x03\xed?\x96\xfcb\xc9/\x96\xec?\x9a\x99\x99\x99\x99\x99\xe9?\x9d6\xd0i\x03\x9d\xe6?333333\xe3?\xb8\x1e\x85\xebQ\xb8\xde?\n\xd7\xa3p=\n\xd7?\xb8\x1e\x85\xebQ\xb8\xce?0\x96\xfcb\xc9/\xc6?\x11\x11\x11\x11\x11\x11\xc1?\xb8\x1e\x85\xebQ\xb8\xbe?\xb8\x1e\x85\xebQ\xb8\xbe?\xe5\x17K~\xb1\xe4\xb7?\xe5\x17K~\xb1\xe4\xb7?\xe5\x17K~\xb1\xe4\xb7?\xe5\x17K~\xb1\xe4\xb7?{\x14\xaeG\xe1z\xb4?{\x14\xaeG\xe1z\xb4?{\x14\xaeG\xe1z\xb4?{\x14\xaeG\xe1z\xb4?{\x14\xaeG\xe1z\xb4?{\x14\xaeG\xe1z\xb4?{\x14\xaeG\xe1z\xb4?\x00\x00\x00\x00\x00\x00\xf0?\x93_,\xf9\xc5\x92\xef?\x93_,\xf9\xc5\x92\xef?&\xbfX\xf2\x8b%\xef?K~\xb1\xe4\x17K\xee?\x03\x9d6\xd0i\x03\xed?\xbc\xbb\xbb\xbb\xbb\xbb\xeb?O\x1b\xe8\xb4\x81N\xeb?\x07:m\xa0\xd3\x06\xea?wwwwww\xe7?\xa0\xd3\x06:m\xa0\xe3?\xecQ\xb8\x1e\x85\xeb\xe1?\xb8\x1e\x85\xebQ\xb8\xde?\n\xd7\xa3p=\n\xd7?7\xd0i\x03\x9d6\xd0?\x9a\x99\x99\x99\x99\x99\xc9?{\x14\xaeG\xe1z\xc4?\xc6\x92_,\xf9\xc5\xc2?O\x1b\xe8\xb4\x81N\xbb?O\x1b\xe8\xb4\x81N\xbb?O\x1b\xe8\xb4\x81N\xbb?O\x1b\xe8\xb4\x81N\xbb?O\x1b\xe8\xb4\x81N\xbb?O\x1b\xe8\xb4\x81N\xbb?\xe5\x17K~\xb1\xe4\xb7?\xe5\x17K~\xb1\xe4\xb7?\xe5\x17K~\xb1\xe4\xb7?'
p15
tp16
bag2
(g3
(I0
tp17
g5
tp18
Rp19
(I1
(I2
I20
I13
I27
tp20
g12
I00
[truncated: 1,049,474 more chars]
