# Supplementary material for: How biological attention mechanisms improve task performance in a large-scale visual system model
Source: eLife journal article supplement (doi:10.7554/elife.38105), 2018-10-01
Supplement: supp [file elife-38105-supp-v1.zip › elife_poa_e38105_Figure_5_source_data_1.txt]

(lp0
cnumpy.core.multiarray
_reconstruct
p1
(cnumpy
ndarray
p2
(I0
tp3
S'b'
p4
tp5
Rp6
(I1
(I2
I8
I13
I12
tp7
cnumpy
dtype
p8
(S'f8'
p9
I0
I1
tp10
Rp11
(I3
S'<'
p12
NNNI-1
I-1
I0
tp13
bI00
S'\x00\x00\x00\x00\x00\x80V@\x00\x00\x00\x00\x00\x80V@\x00\x00\x00\x00\x00\x80V@\x00\x00\x00\x00\x00\x00V@\x00\x00\x00\x00\x00\x80U@\x00\x00\x00\x00\x00\x00V@\x00\x00\x00\x00\x00\x80U@\x00\x00\x00\x00\x00\x00V@\x00\x00\x00\x00\x00\x00U@\x00\x00\x00\x00\x00\x80T@\x00\x00\x00\x00\x00\x80T@\x00\x00\x00\x00\x00\x80T@\x00\x00\x00\x00\x00\x80V@\x00\x00\x00\x00\x00\x80V@\x00\x00\x00\x00\x00\x80V@\x00\x00\x00\x00\x00\x80V@\x00\x00\x00\x00\x00\x00W@\x00\x00\x00\x00\x00\x00W@\x00\x00\x00\x00\x00\x00W@\x00\x00\x00\x00\x00\x00W@\x00\x00\x00\x00\x00\x00V@\x00\x00\x00\x00\x00\x00T@\x00\x00\x00\x00\x00\x00T@\x00\x00\x00\x00\x00\x00R@\x00\x00\x00\x00\x00\x80V@\x00\x00\x00\x00\x00\x80V@\x00\x00\x00\x00\x00\x80V@\x00\x00\x00\x00\x00\x00V@\x00\x00\x00\x00\x00\x00W@\x00\x00\x00\x00\x00\x00V@\x00\x00\x00\x00\x00\x80V@\x00\x00\x00\x00\x00\x80V@\x00\x00\x00\x00\x00\x00W@\x00\x00\x00\x00\x00\x00W@\x00\x00\x00\x00\x00\x00V@\x00\x00\x00\x00\x00\x80U@\x00\x00\x00\x00\x00\x80V@\x00\x00\x00\x00\x00\x80V@\x00\x00\x00\x00\x00\x80V@\x00\x00\x00\x00\x00\x80T@\x00\x00\x00\x00\x00\x80R@\x00\x00\x00\x00\x00\x00O@\x00\x00\x00\x00\x00\x00F@\x00\x00\x00\x00\x00\x00>@\x00\x00\x00\x00\x00\x008@\x00\x00\x00\x00\x00\x002@\x00\x00\x00\x00\x00\x002@\x00\x00\x00\x00\x00\x000@\x00\x00\x00\x00\x00\x80V@\x00\x00\x00\x00\x00\x80V@\x00\x00\x00\x00\x00\x00W@\x00\x00\x00\x00\x00\x80T@\x00\x00\x00\x00\x00\x00R@\x00\x00\x00\x00\x00\x00O@\x00\x00\x00\x00\x00\x00G@\x00\x00\x00\x00\x00\x00>@\x01\x00\x00\x00\x00\x00<@\x00\x00\x00\x00\x00\x006@\x00\x00\x00\x00\x00\x002@\x01\x00\x00\x00\x00\x00,@\x00\x00\x00\x00\x00\x80V@\x00\x00\x00\x00\x00\x00V@\x00\x00\x00\x00\x00\x80V@\x00\x00\x00\x00\x00\x00U@\x00\x00\x00\x00\x00\x00T@\x00\x00\x00\x00\x00\x00P@\xff\xff\xff\xff\xff\xffL@\x00\x00\x00\x00\x00\x00G@\x00\x00\x00\x00\x00\x00F@\x00\x00\x00\x00\x00\x00C@\x00\x00\x00\x00\x00\x00B@\x00\x00\x00\x00\x00\x00A@\x00\x00\x00\x00\x00\x80V@\x00\x00\x00\x00\x00\x00V@\x00\x00\x00\x00\x00\x00V@\x00\x00\x00\x00\x00\x80U@\x00\x00\x00\x00\x00\x80U@\x00\x00\x00\x00\x00\x80U@\x00\x00\x00\x00\x00\x00S@\x00\x00\x00\x00\x00\x00O@\x01\x00\x00\x00\x00\x00L@\x00\x00\x00\x00\x00\x00H@\x00\x00\x00\x00\x00\x00E@\x00\x00\x00\x00\x00\x00:@\x00\x00\x00\x00\x00\x80V@\x00\x00\x00\x00\x00\x80V@\x00\x00\x00\x00\x00\x80W@\x00\x00\x00\x00\x00\x80W@\x00\x00\x00\x00\x00\x80W@\x00\x00\x00\x00\x00\x80W@\x00\x00\x00\x00\x00\x00W@\x00\x00\x00\x00\x00\x00W@\x00\x00\x00\x00\x00\x00W@\x00\x00\x00\x00\x00\x00V@\x00\x00\x00\x00\x00\x80T@\x00\x00\x00\x00\x00\x80T@\x00\x00\x00\x00\x00\x80V@\x00\x00\x00\x00\x00\x80V@\x00\x00\x00\x00\x00\x80X@\x00\x00\x00\x00\x00\x80X@\x00\x00\x00\x00\x00\x80X@\x00\x00\x00\x00\x00\x00Y@\x00\x00\x00\x00\x00\x00Y@\x00\x00\x00\x00\x00\x00Y@\x00\x00\x00\x00\x00\x00Y@\x00\x00\x00\x00\x00\x00Y@\x00\x00\x00\x00\x00\x00Y@\x00\x00\x00\x00\x00\x00Y@\x00\x00\x00\x00\x00\x80V@\x00\x00\x00\x00\x00\x00X@\x00\x00\x00\x00\x00\x80X@\x00\x00\x00\x00\x00\x00Y@\x00\x00\x00\x00\x00\x00Y@\x00\x00\x00\x00\x00\x00Y@\x00\x00\x00\x00\x00\x00Y@\x00\x00\x00\x00\x00\x00Y@\x00\x00\x00\x00\x00\x00Y@\x00\x00\x00\x00\x00\x00Y@\x00\x00\x00\x00\x00\x00Y@\x00\x00\x00\x00\x00\x00Y@\x00\x00\x00\x00\x00\x80V@\x00\x00\x00\x00\x00\x00W@\x00\x00\x00\x00\x00\x80X@\x00\x00\x00\x00\x00\x00Y@\x00\x00\x00\x00\x00\x00Y@\x00\x00\x00\x00\x00\x00Y@\x00\x00\x00\x00\x00\x00Y@\x00\x00\x00\x00\x00\x00Y@\x00\x00\x00\x00\x00\x00Y@\x00\x00\x00\x00\x00\x00Y@\x00\x00\x00\x00\x00\x00Y@\x00\x00\x00\x00\x00\x80X@\x00\x00\x00\x00\x00\x80V@\x00\x00\x00\x00\x00\x80X@\x00\x00\x00\x00\x00\x00Y@\x00\x00\x00\x00\x00\x00Y@\x00\x00\x00\x00\x00\x00Y@\x00\x00\x00\x00\x00\x00Y@\x00\x00\x00\x00\x00\x00Y@\x00\x00\x00\x00\x00\x00Y@\x00\x00\x00\x00\x00\x00Y@\x00\x00\x00\x00\x00\x00Y@\x00\x00\x00\x00\x00\x00Y@\x00\x00\x00\x00\x00\x00Y@\x00\x00\x00\x00\x00\x80V@\x00\x00\x00\x00\x00\x80W@\x00\x00\x00\x00\x00\x00Y@\x00\x00\x00\x00\x00\x00Y@\x00\x00\x00\x00\x00\x00Y@\x00\x00\x00\x00\x00\x00Y@\x00\x00\x00\x00\x00\x00Y@\x00\x00\x00\x00\x00\x00Y@\x00\x00\x00\x00\x00\x00Y@\x00\x00\x00\x00\x00\x00Y@\x00\x00\x00\x00\x00\x00Y@\x00\x00\x00\x00\x00\x00Y@\x00\x00\x00\x00\x00\x00\x00@\x00\x00\x00\x00\x00\x00\x00@\x00\x00\x00\x00\x00\x00\x00\x00\x00\x00\x00\x00\x00\x00\x00\x00\x00\x00\x00\x00\x00\x00\x00\x00\x00\x00\x00\x00\x00\x00\x00\x00\x00\x00\x00\x00\x00\x00\x00\x00\x00\x00\x00\x00\x00\x00\x00\x00\x00\x00\x00\x00\x00\x00\x00\x00\x00\x00\x00\x00\x00\x00\x00\x00\x00\x00\x00\x00\x00\x00\x00\x00\x00\x00\x00\x00\x00\x00\x00\x00\x00\x00\x00\x00\x00\x00\x00@\x00\x00\x00\x00\x00\x00\x00\x00\x00\x00\x00\x00\x00\x00\x00\x00\x00\x00\x00\x00\x00\x00\x00\x00\x00\x00\x00\x00\x00\x00\x00\x00\x00\x00\x00\x00\x00\x00\x00\x00\x00\x00\x00\x00\x00\x00\x00\x00\x00\x00\x00\x00\x00\x00\x00\x00\x00\x00\x00\x00\x00\x00\x00\x00\x00\x00\x00\x00\x00\x00\x00\x00\x00\x00\x00\x00\x00\x00\x00\x00\x00\x00\x00\x00\x00\x00\x00\x00\x00\x00\x00\x00\x00\x00\x00@\x00\x00\x00\x00\x00\x00\x00\x00\x00\x00\x00\x00\x00\x00\x00\x00\x00\x00\x00\x00\x00\x00\x00\x00\x00\x00\x00\x00\x00\x00\x00\x00\x00\x00\x00\x00\x00\x00\x00\x00\x00\x00\x00\x00\x00\x00\x00\x00\x00\x00\x00\x00\x00\x00\x00\x00\x00\x00\x00\x00\x00\x00\x00\x00\x00\x00\x00\x00\x00\x00\x00\x00\x00\x00\x00\x00\x00\x00\x00\x00\x00\x00\x00\x00\x00\x00\x00\x00\x00\x00\x00\x00\x00\x00\x00@\x00\x00\x00\x00\x00\x00\x00\x00\x00\x00\x00\x00\x00\x00\x00\x00\x00\x00\x00\x00\x00\x00\x00\x00\x00\x00\x00\x00\x00\x00\x00\x00\x00\x00\x00\x00\x00\x00\x00\x00\x00\x00\x00\x00\x00\x00\x00\x00\x00\x00\x00\x00\x00\x00\x00\x00\x00\x00\x00\x00\x00\x00\x00\x00\x00\x00\x00\x00\x00\x00\x00\x00\x00\x00\x00\x00\x00\x00\x00\x00\x00\x00\x00\x00\x00\x00\x00\x00\x00\x00\x00\x00\x00\x00\x00@\x00\x00\x00\x00\x00\x00\x00\x00\x00\x00\x00\x00\x00\x00\x00\x00\x00\x00\x00\x00\x00\x00\x00\x00\x00\x00\x00\x00\x00\x00\x00\x00\x00\x00\x00\x00\x00\x00\x00\x00\x00\x00\x00\x00\x00\x00\x00\x00\x00\x00\x00\x00\x00\x00\x00\x00\x00\x00\x00\x00\x00\x00\x00\x00\x00\x00\x00\x00\x00\x00\x00\x00\x00\x00\x00\x00\x00\x00\x00\x00\x00\x00\x00\x00\x00\x00\x00\x00\x00\x00\x00\x00\x00\x00\x00@\x00\x00\x00\x00\x00\x00\x00\x00\x00\x00\x00\x00\x00\x00\x00\x00\x00\x00\x00\x00\x00\x00\x00\x00\x00\x00\x00\x00\x00\x00\x00\x00\x00\x00\x00\x00\x00\x00\x00\x00\x00\x00\x00\x00\x00\x00\x00\x00\x00\x00\x00\x00\x00\x00\x00\x00\x00\x00\x00\x00\x00\x00\x00\x00\x00\x00\x00\x00\x00\x00\x00\x00\x00\x00\x00\x00\x00\x00\x00\x00\x00\x00\x00\x00\x00\x00\x00\x00\x00\x00\x00\x00\x00\x00\x00@\x00\x00\x00\x00\x00\x00\x00\x00\x00\x00\x00\x00\x00\x00\x00\x00\x00\x00\x00\x00\x00\x00\x00\x00\x00\x00\x00\x00\x00\x00\x00\x00\x00\x00\x00\x00\x00\x00\x00\x00\x00\x00\x00\x00\x00\x00\x00\x00\x00\x00\x00\x00\x00\x00\x00\x00\x00\x00\x00\x00\x00\x00\x00\x00\x00\x00\x00\x00\x00\x00\x00\x00\x00\x00\x00\x00\x00\x00\x00\x00\x00\x00\x00\x00\x00\x00\x00\x00\x00\x00\x00\x00\x00\x00\x00@\x00\x00\x00\x00\x00\x00\x00@\x00\x00\x00\x00\x00\x00\x10@\x00\x00\x00\x00\x00\x00\x10@\x00\x00\x00\x00\x00\x00\x00@\x00\x00\x00\x00\x00\x00\x00@\x00\x00\x00\x00\x00\x00\x00@\x00\x00\x00\x00\x00\x00\x00@\x00\x00\x00\x00\x00\x00\x00\x00\x00\x00\x00\x00\x00\x00\x00\x00\x00\x00\x00\x00\x00\x00\x00\x00\x00\x00\x00\x00\x00\x00\x00\x00\x00\x00\x00\x00\x00\x00\x00@\x00\x00\x00\x00\x00\x00(@\x00\x00\x00\x00\x00\x000@\x01\x00\x00\x00\x00\x00<@\x00\x00\x00\x00\x00\x00E@\x00\x00\x00\x00\x00\x00I@\x01\x00\x00\x00\x00\x00L@\x00\x00\x00\x00\x00\x00P@\x00\x00\x00\x00\x00\x00R@\x00\x00\x00\x00\x00\x80R@\x00\x00\x00\x00\x00\x80S@\x00\x00\x00\x00\x00\x00T@\x00\x00\x00\x00\x00\x00\x00@\x01\x00\x00\x00\x00\x00,@\x00\x00\x00\x00\x00\x00A@\x01\x00\x00\x00\x00\x00L@\x00\x00\x00\x00\x00\x80Q@\x00\x00\x00\x00\x00\x00T@\x00\x00\x00\x00\x00\x80W@\x00\x00\x00\x00\x00\x80W@\x00\x00\x00\x00\x00\x00X@\x00\x00\x00\x00\x00\x00Y@\x00\x00\x00\x00\x00\x00Y@\x00\x00\x00\x00\x00\x00Y@\x00\x00\x00\x00\x00\x00\x00@\x00\x00\x00\x00\x00\x00(@\x00\x00\x00\x00\x00\x002@\x00\x00\x00\x00\x00\x00>@\x00\x00\x00\x00\x00\x00F@\x00\x00\x00\x00\x00\x00H@\x00\x00\x00\x00\x00\x00N@\x00\x00\x00\x00\x00\x80P@\x00\x00\x00\x00\x00\x00Q@\x00\x00\x00\x00\x00\x80Q@\x00\x00\x00\x00\x00\x00R@\x00\x00\x00\x00\x00\x00R@\x00\x00\x00\x00\x00\x00\x00@\x00\x00\x00\x00\x00\x006@\x00\x00\x00\x00\x00\x00C@\x00\x00\x00\x00\x00\x00Q@\x00\x00\x00\x00\x00\x80S@\x00\x00\x00\x00\x00\x00X@\x00\x00\x00\x00\x00\x00Y@\x00\x00\x00\x00\x00\x00Y@\x00\x00\x00\x00\x00\x00Y@\x00\x00\x00\x00\x00\x00Y@\x00\x00\x00\x00\x00\x00Y@\x00\x00\x00\x00\x00\x00Y@\x00\x00\x00\x00\x00\x00\x00@\x00\x00\x00\x00\x00\x00(@\x00\x00\x00\x00\x00\x008@\x00\x00\x00\x00\x00\x00D@\x01\x00\x00\x00\x00\x00L@\x00\x00\x00\x00\x00\x00Q@\x00\x00\x00\x00\x00\x80U@\x00\x00\x00\x00\x00\x00W@\x00\x00\x00\x00\x00\x00Y@\x00\x00\x00\x00\x00\x00Y@\x00\x00\x00\x00\x00\x00Y@\x00\x00\x00\x00\x00\x00Y@\x00\x00\x00\x00\x00\x00 @\x00\x00\x00\x00\x00\x00\x18@\x00\x00\x00\x00\x00\x00\x10@\x00\x00\x00\x00\x00\x00\x00\x00\x00\x00\x00\x00\x00\x00\x00\x00\x00\x00\x00\x00\x00\x00\x00\x00\x00\x00\x00\x00\x00\x00\x00\x00\x00\x00\x00\x00\x00\x00\x00\x00\x00\x00\x00\x00\x00\x00\x00\x00\x00\x00\x00\x00\x00\x00\x00\x00\x00\x00\x00\x00\x00\x00\x00\x00\x00\x00\x00\x00\x00\x00\x00\x00\x00\x00\x00\x00\x00\x00 @\x00\x00\x00\x00\x00\x00\x10@\x00\x00\x00\x00\x00\x00\x00\x00\x00\x00\x00\x00\x00\x00\x00\x00\x00\x00\x00\x00\x00\x00\x00\x00\x00\x00\x00\x00\x00\x00\x00\x00\x00\x00\x00\x00\x00\x00\x00\x00\x00\x00\x00\x00\x00\x00\x00\x00\x00\x00\x00\x00\x00\x00\x00\x00\x00\x00\x00\x00\x00\x00\x00\x00\x00\x00\x00\x00\x00\x00\x10@\x00\x00\x00\x00\x00\x00\x18@\x00\x00\x00\x00\x00\x00 @\x00\x00\x00\x00\x00\x00\x18@\x00\x00\x00\x00\x00\x00\x00\x00\x00\x00\x00\x00\x00\x00\x00\x00\x00\x00\x00\x00\x00\x00\x00\x00\x00\x00\x00\x00\x00\x00\x00\x00\x00\x00\x00\x00\x00\x00\x00\x00\x00\x00\x00\x00\x00\x00\x00\x00\x00\x00\x00\x00\x00\x00\x00\x00\x00\x00\x00\x00\x00\x00\x00@\x00\x00\x00\x00\x00\x00\x00@\x00\x00\x00\x00\x00\x00\x10@\x00\x00\x00\x00\x00\x00 @\x00\x00\x00\x00\x00\x00\x10@\x00\x00\x00\x00\x00\x00\x00@\x00\x00\x00\x00\x00\x00\x10@\x00\x00\x00\x00\x00\x00\x10@\x00\x00\x00\x00\x00\x00 @\x00\x00\x00\x00\x00\x00 @\x00\x00\x00\x00\x00\x00@@\x00\x00\x00\x00\x00\x00H@\xff\xff\xff\xff\xff\xffL@\x00\x00\x00\x00\x00\x80P@\x00\x00\x00\x00\x00\x80R@\x00\x00\x00\x00\x00\x00 @\x00\x00\x00\x00\x00\x00 @\x00\x00\x00\x00\x00\x00\x18@\x00\x00\x00\x00\x00\x00$@\x01\x00\x00\x00\x00\x00,@\x00\x00\x00\x00\x00\x006@\x00\x00\x00\x00\x00\x00@@\x00\x00\x00\x00\x00\x00>@\x00\x00\x00\x00\x00\x00>@\x00\x00\x00\x00\x00\x00@@\x00\x00\x00\x00\x00\x00A@\x00\x00\x00\x00\x00\x00A@\x00\x00\x00\x00\x00\x00 @\x00\x00\x00\x00\x00\x00$@\x00\x00\x00\x00\x00\x00$@\x00\x00\x00\x00\x00\x00\x10@\x00\x00\x00\x00\x00\x00\x18@\x01\x00\x00\x00\x00\x00,@\x00\x00\x00\x00\x00\x000@\x00\x00\x00\x00\x00\x004@\x00\x00\x00\x00\x00\x002@\x00\x00\x00\x00\x00\x006@\x00\x00\x00\x00\x00\x00:@\x00\x00\x00\x00\x00\x00:@\x00\x00\x00\x00\x00\x00 @\x00\x00\x00\x00\x00\x00 @\x00\x00\x00\x00\x00\x00$@\x00\x00\x00\x00\x00\x00$@\x00\x00\x00\x00\x00\x00$@\x00\x00\x00\x00\x00\x00(@\x00\x00\x00\x00\x00\x00 @\x00\x00\x00\x00\x00\x00 @\x00\x00\x00\x00\x00\x00 @\x00\x00\x00\x00\x00\x00 @\x00\x00\x00\x00\x00\x00\x18@\x00\x00\x00\x00\x00\x00 @\x00\x00\x00\x00\x00\x00 @\x00\x00\x00\x00\x00\x00(@\x00\x00\x00\x00\x00\x000@\x00\x00\x00\x00\x00\x000@\x00\x00\x00\x00\x00\x000@\x00\x00\x00\x00\x00\x00(@\x00\x00\x00\x00\x00\x00$@\x00\x00\x00\x00\x00\x00(@\x01\x00\x00\x00\x00\x00,@\x00\x00\x00\x00\x00\x000@\x00\x00\x00\x00\x00\x004@\x00\x00\x00\x00\x00\x006@\x00\x00\x00\x00\x00\x00 @\x00\x00\x00\x00\x00\x00(@\x00\x00\x00\x00\x00\x004@\x00\x00\x00\x00\x00\x00:@\x00\x00\x00\x00\x00\x00A@\x00\x00\x00\x00\x00\x00A@\x00\x00\x00\x00\x00\x00@@\x00\x00\x00\x00\x00\x00A@\x00\x00\x00\x00\x00\x00C@\x00\x00\x00\x00\x00\x00E@\x00\x00\x00\x00\x00\x00D@\x00\x00\x00\x00\x00\x00E@\x00\x00\x00\x00\x00\x00 @\x00\x00\x00\x00\x00\x00(@\x00\x00\x00\x00\x00\x006@\x00\x00\x00\x00\x00\x00B@\x00\x00\x00\x00\x00\x00E@\x00\x00\x00\x00\x00\x00I@\x00\x00\x00\x00\x00\x00J@\xff\xff\xff\xff\xff\xffL@\x00\x00\x00\x00\x00\x80P@\x00\x00\x00\x00\x00\x80Q@\x00\x00\x00\x00\x00\x80Q@\x00\x00\x00\x00\x00\x80R@\x00\x00\x00\x00\x00\x00 @\x00\x00\x00\x00\x00\x00 @\x01\x00\x00\x00\x00\x00,@\x00\x00\x00\x00\x00\x004@\x00\x00\x00\x00\x00\x00:@\x00\x00\x00\x00\x00\x00@@\x00\x00\x00\x00\x00\x00E@\x00\x00\x00\x00\x00\x00F@\x00\x00\x00\x00\x00\x00G@\x00\x00\x00\x00\x00\x00G@\x00\x00\x00\x00\x00\x00H@\x00\x00\x00\x00\x00\x00H@\x00\x00\x00\x00\x00\x00 @\x00\x00\x00\x00\x00\x00(@\x00\x00\x00\x00\x00\x008@\x01\x00\x00\x00\x00\x00<@\x00\x00\x00\x00\x00\x00F@\x00\x00\x00\x00\x00\x00H@\x00\x00\x00\x00\x00\x00N@\x00\x00\x00\x00\x00\x00P@\x00\x00\x00\x00\x00\x80P@\x00\x00\x00\x00\x00\x00R@\x00\x00\x00\x00\x00\x00S@\x00\x00\x00\x00\x00\x00U@\x00\x00\x00\x00\x00\x00 @\x00\x00\x00\x00\x00\x00(@\x00\x00\x00\x00\x00\x002@\x00\x00\x00\x00\x00\x008@\x00\x00\x00\x00\x00\x00B@\x00\x00\x00\x00\x00\x00F@\x01\x00\x00\x00\x00\x00L@\x00\x00\x00\x00\x00\x00N@\x00\x00\x00\x00\x00\x00Q@\x00\x00\x00\x00\x00\x80R@\x00\x00\x00\x00\x00\x80S@\x00\x00\x00\x00\x00\x00T@\x00\x00\x00\x00\x00\x002@\x00\x00\x00\x00\x00\x004@\x00\x00\x00\x00\x00\x006@\x00\x00\x00\x00\x00\x006@\x00\x00\x00\x00\x00\x004@\x00\x00\x00\x00\x00\x008@\x00\x00\x00\x00\x00\x006@\x00\x00\x00\x00\x00\x004@\x00\x00\x00\x00\x00\x004@\x00\x00\x00\x00\x00\x004@\x00\x00\x00\x00\x00\x004@\x00\x00\x00\x00\x00\x004@\x00\x00\x00\x00\x00\x002@\x00\x00\x00\x00\x00\x006@\x00\x00\x00\x00\x00\x004@\x00\x00\x00\x00\x00\x004@\x00\x00\x00\x00\x00\x002@\x00\x00\x00\x00\x00\x004@\x00\x00\x00\x00\x00\x002@\x00\x00\x00\x00\x00\x002@\x00\x00\x00\x00\x00\x002@\x00\x00\x00\x00\x00\x00$@\x00\x00\x00\x00\x00\x00 @\x00\x00\x00\x00\x00\x00\x18@\x00\x00\x00\x00\x00\x002@\x01\x00\x00\x00\x00\x00,@\x01\x00\x00\x00\x00\x00,@\x00\x00\x00\x00\x00\x004@\x00\x00\x00\x00\x00\x00@@\x00\x00\x00\x00\x00\x00@@\x00\x00\x00\x00\x00\x008@\x00\x00\x00\x00\x00\x008@\x00\x00\x00\x00\x00\x006@\x00\x00\x00\x00\x00\x006@\x00\x00\x00\x00\x00\x00:@\x01\x00\x00\x00\x00\x00<@\x00\x00\x00\x00\x00\x002@\x00\x00\x00\x00\x00\x008@\x01\x00\x00\x00\x00\x00<@\x00\x00\x00\x00\x00\x00C@\x00\x00\x00\x00\x00\x00K@\x00\x00\x00\x00\x00\x00P@\x00\x00\x00\x00\x00\x00N@\x00\x00\x00\x00\x00\x00Q@\x00\x00\x00\x00\x00\x00Q@\x00\x00\x00\x00\x00\x00Q@\x00\x00\x00\x00\x00\x00Q@\x00\x00\x00\x00\x00\x80Q@\x00\x00\x00\x00\x00\x002@\x00\x00\x00\x00\x00\x006@\x00\x00\x00\x00\x00\x00B@\x00\x00\x00\x00\x00\x00Q@\x00\x00\x00\x00\x00\x80T@\x00\x00\x00\x00\x00\x00V@\x00\x00\x00\x00\x00\x80W@\x00\x00\x00\x00\x00\x00X@\x00\x00\x00\x00\x00\x00X@\x00\x00\x00\x00\x00\x80W@\x00\x00\x00\x00\x00\x80W@\x00\x00\x00\x00\x00\x80W@\x00\x00\x00\x00\x00\x002@\x00\x00\x00\x00\x00\x00:@\x00\x00\x00\x00\x00\x00E@\x00\x00\x00\x00\x00\x80R@\x00\x00\x00\x00\x00\x00V@\x00\x00\x00\x00\x00\x00X@\x00\x00\x00\x00\x00\x00Y@\x00\x00\x00\x00\x00\x00Y@\x00\x00\x00\x00\x00\x00Y@\x00\x00\x00\x00\x00\x00Y@\x00\x00\x00\x00\x00\x00Y@\x00\x00\x00\x00\x00\x00Y@\x00\x00\x00\x00\x00\x002@\x00\x00\x00\x00\x00\x00:@\x00\x00\x00\x00\x00\x00D@\x01\x00\x00\x00\x00\x00L@\x00\x00\x00\x00\x00\x80R@\x00\x00\x00\x00\x00\x00U@\x00\x00\x00\x00\x00\x00W@\x00\x00\x00\x00\x00\x80W@\x00\x00\x00\x00\x00\x80W@\x00\x00\x00\x00\x00\x00X@\x00\x00\x00\x00\x00\x00Y@\x00\x00\x00\x00\x00\x80X@\x00\x00\x00\x00\x00\x002@\x00\x00\x00\x00\x00\x00>@\x00\x00\x00\x00\x00\x00H@\x00\x00\x00\x00\x00\x00Q@\x00\x00\x00\x00\x00\x00V@\x00\x00\x00\x00\x00\x80W@\x00\x00\x00\x00\x00\x80X@\x00\x00\x00\x00\x00\x80X@\x00\x00\x00\x00\x00\x80X@\x00\x00\x00\x00\x00\x00Y@\x00\x00\x00\x00\x00\x00Y@\x00\x00\x00\x00\x00\x00Y@\x00\x00\x00\x00\x00\x002@\x01\x00\x00\x00\x00\x00<@\x00\x00\x00\x00\x00\x00I@\x00\x00\x00\x00\x00\x00T@\x00\x00\x00\x00\x00\x00U@\x00\x00\x00\x00\x00\x00W@\x00\x00\x00\x00\x00\x80W@\x00\x00\x00\x00\x00\x80W@\x00\x00\x00\x00\x00\x00V@\x00\x00\x00\x00\x00\x00U@\x00\x00\x00\x00\x00\x80S@\x00\x00\x00\x00\x00\x80S@\x00\x00\x00\x00\x00\x002@\x00\x00\x00\x00\x00\x00A@\xff\xff\xff\xff\xff\xffL@\x00\x00\x00\x00\x00\x00U@\x00\x00\x00\x00\x00\x00W@\x00\x00\x00\x00\x00\x80X@\x00\x00\x00\x00\x00\x80X@\x00\x00\x00\x00\x00\x00Y@\x00\x00\x00\x00\x00\x00Y@\x00\x00\x00\x00\x00\x00Y@\x00\x00\x00\x00\x00\x00Y@\x00\x00\x00\x00\x00\x00Y@\x00\x00\x00\x00\x00\x002@\x00\x00\x00\x00\x00\x00@@\x00\x00\x00\x00\x00\x80P@\x00\x00\x00\x00\x00\x80T@\x00\x00\x00\x00\x00\x00W@\x00\x00\x00\x00\x00\x80W@\x00\x00\x00\x00\x00\x00X@\x00\x00\x00\x00\x00\x00X@\x00\x00\x00\x00\x00\x80W@\x00\x00\x00\x00\x00\x80W@\x00\x00\x00\x00\x00\x80W@\x00\x00\x00\x00\x00\x00W@\x00\x00\x00\x00\x00\x002@\x00\x00\x00\x00\x00\x00A@\x00\x00\x00\x00\x00\x80P@\x00\x00\x00\x00\x00\x00W@\x00\x00\x00\x00\x00\x00Y@\x00\x00\x00\x00\x00\x00Y@\x00\x00\x00\x00\x00\x00Y@\x00\x00\x00\x00\x00\x00Y@\x00\x00\x00\x00\x00\x00Y@\x00\x00\x00\x00\x00\x00Y@\x00\x00\x00\x00\x00\x00Y@\x00\x00\x00\x00\x00\x00Y@\x00\x00\x00\x00\x00\x002@\x01\x00\x00\x00\x00\x00<@\x00\x00\x00\x00\x00\x00F@\x00\x00\x00\x00\x00\x00Q@\x00\x00\x00\x00\x00\x80V@\x00\x00\x00\x00\x00\x00X@\x00\x00\x00\x00\x00\x00Y@\x00\x00\x00\x00\x00\x00Y@\x00\x00\x00\x00\x00\x00Y@\x00\x00\x00\x00\x00\x00Y@\x00\x00\x00\x00\x00\x00Y@\x00\x00\x00\x00\x00\x00Y@\x00\x00\x00\x00\x00\x004@\x00\x00\x00\x00\x00\x004@\x00\x00\x00\x00\x00\x004@\x00\x00\x00\x00\x00\x004@\x00\x00\x00\x00\x00\x006@\x00\x00\x00\x00\x00\x006@\x00\x00\x00\x00\x00\x006@\x00\x00\x00\x00\x00\x008@\x00\x00\x00\x00\x00\x006@\x00\x00\x00\x00\x00\x006@\x00\x00\x00\x00\x00\x004@\x00\x00\x00\x00\x00\x002@\x00\x00\x00\x00\x00\x004@\x00\x00\x00\x00\x00\x004@\x00\x00\x00\x00\x00\x00:@\x00\x00\x00\x00\x00\x00@@\x00\x00\x00\x00\x00\x00E@\x00\x00\x00\x00\x00\x00H@\x00\x00\x00\x00\x00\x00K@\x01\x00\x00\x00\x00\x00L@\x01\x00\x00\x00\x00\x00L@\x00\x00\x00\x00\x00\x00K@\x00\x00\x00\x00\x00\x00G@\x00\x00\x00\x00\x00\x00G@\x00\x00\x00\x00\x00\x004@\x00\x00\x00\x00\x00\x004@\x00\x00\x00\x00\x00\x008@\x01\x00\x00\x00\x00\x00<@\x00\x00\x00\x00\x00\x00>@\x00\x00\x00\x00\x00\x00@@\x01\x00\x00\x00\x00\x00<@\x00\x00\x00\x00\x00\x004@\x00\x00\x00\x00\x00\x002@\x01\x00\x00\x00\x00\x00,@\x00\x00\x00\x00\x00\x00$@\x00\x00\x00\x00\x00\x00$@\x00\x00\x00\x00\x00\x004@\x01\x00\x00\x00\x00\x00<@\x00\x00\x00\x00\x00\x00D@\x00\x00\x00\x00\x00\x00P@\x00\x00\x00\x00\x00\x80V@\x00\x00\x00\x00\x00\x00X@\x00\x00\x00\x00\x00\x80W@\x00\x00\x00\x00\x00\x00V@\x00\x00\x00\x00\x00\x00S@\x00\x00\x00\x00\x00\x00Q@\x00\x00\x00\x00\x00\x00I@\x00\x00\x00\x00\x00\x00F@\x00\x00\x00\x00\x00\x004@\x01\x00\x00\x00\x00\x00<@\x00\x00\x00\x00\x00\x00K@\x00\x00\x00\x00\x00\x00R@\x00\x00\x00\x00\x00\x00T@\x00\x00\x00\x00\x00\x80U@\x00\x00\x00\x00\x00\x80U@\x00\x00\x00\x00\x00\x80U@\x00\x00\x00\x00\x00\x00U@\x00\x00\x00\x00\x00\x80T@\x00\x00\x00\x00\x00\x00T@\x00\x00\x00\x00\x00\x00S@\x00\x00\x00\x00\x00\x004@\x00\x00\x00\x00\x00\x008@\x00\x00\x00\x00\x00\x00B@\x00\x00\x00\x00\x00\x80Q@\x00\x00\x00\x00\x00\x00U@\x00\x00\x00\x00\x00\x00U@\x00\x00\x00\x00\x00\x00U@\x00\x00\x00\x00\x00\x80U@\x00\x00\x00\x00\x00\x00U@\x00\x00\x00\x00\x00\x00U@\x00\x00\x00\x00\x00\x80S@\x00\x00\x00\x00\x00\x80S@\x00\x00\x00\x00\x00\x004@\x00\x00\x00\x00\x00\x008@\x00\x00\x00\x00\x00\x00@@\x00\x00\x00\x00\x00\x00B@\x00\x00\x00\x00\x00\x00E@\x00\x00\x00\x00\x00\x00G@\x01\x00\x00\x00\x00\x00L@\x00\x00\x00\x00\x00\x00P@\x00\x00\x00\x00\x00\x80Q@\x00\x00\x00\x00\x00\x00Q@\x00\x00\x00\x00\x00\x00Q@\x00\x00\x00\x00\x00\x00P@\x00\x00\x00\x00\x00\x004@\x00\x00\x00\x00\x00\x006@\x00\x00\x00\x00\x00\x008@\x00\x00\x00\x00\x00\x00G@\x00\x00\x00\x00\x00\x00R@\x00\x00\x00\x00\x00\x00W@\x00\x00\x00\x00\x00\x00X@\x00\x00\x00\x00\x00\x00X@\x00\x00\x00\x00\x00\x80W@\x00\x00\x00\x00\x00\x80W@\x00\x00\x00\x00\x00\x00X@\x00\x00\x00\x00\x00\x00X@\x00\x00\x00\x00\x00\x004@\x00\x00\x00\x00\x00\x00>@\x00\x00\x00\x00\x00\x00K@\x00\x00\x00\x00\x00\x00W@\x00\x00\x00\x00\x00\x80X@\x00\x00\x00\x00\x00\x00Y@\x00\x00\x00\x00\x00\x00Y@\x00\x00\x00\x00\x00\x00Y@\x00\x00\x00\x00\x00\x00Y@\x00\x00\x00\x00\x00\x00Y@\x00\x00\x00\x00\x00\x00Y@\x00\x00\x00\x00\x00\x00Y@\x00\x00\x00\x00\x00\x004@\x00\x00\x00\x00\x00\x00B@\x00\x00\x00\x00\x00\x00S@\x00\x00\x00\x00\x00\x00X@\x00\x00\x00\x00\x00\x00Y@\x00\x00\x00\x00\x00\x00Y@\x00\x00\x00\x00\x00\x00Y@\x00\x00\x00\x00\x00\x00Y@\x00\x00\x00\x00\x00\x00Y@\x00\x00\x00\x00\x00\x00Y@\x00\x00\x00\x00\x00\x00Y@\x00\x00\x00\x00\x00\x00Y@\x00\x00\x00\x00\x00\x004@\x00\x00\x00\x00\x00\x00J@\x00\x00\x00\x00\x00\x00W@\x00\x00\x00\x00\x00\x00Y@\x00\x00\x00\x00\x00\x00Y@\x00\x00\x00\x00\x00\x00Y@\x00\x00\x00\x00\x00\x00Y@\x00\x00\x00\x00\x00\x00Y@\x00\x00\x00\x00\x00\x00Y@\x00\x00\x00\x00\x00\x00Y@\x00\x00\x00\x00\x00\x00Y@\x00\x00\x00\x00\x00\x00Y@\x00\x00\x00\x00\x00\x004@\x00\x00\x00\x00\x00\x00F@\x00\x00\x00\x00\x00\x80V@\x00\x00\x00\x00\x00\x80X@\x00\x00\x00\x00\x00\x00Y@\x00\x00\x00\x00\x00\x00Y@\x00\x00\x00\x00\x00\x00Y@\x00\x00\x00\x00\x00\x00Y@\x00\x00\x00\x00\x00\x00Y@\x00\x00\x00\x00\x00\x00Y@\x00\x00\x00\x00\x00\x00Y@\x00\x00\x00\x00\x00\x00Y@\x00\x00\x00\x00\x00\x004@\x00\x00\x00\x00\x00\x00A@\x00\x00\x00\x00\x00\x00P@\x00\x00\x00\x00\x00\x00U@\x00\x00\x00\x00\x00\x00X@\x00\x00\x00\x00\x00\x00Y@\x00\x00\x00\x00\x00\x00Y@\x00\x00\x00\x00\x00\x00Y@\x00\x00\x00\x00\x00\x00Y@\x00\x00\x00\x00\x00\x00Y@\x00\x00\x00\x00\x00\x00Y@\x00\x00\x00\x00\x00\x00Y@\x00\x00\x00\x00\x00\x000@\x00\x00\x00\x00\x00\x002@\x00\x00\x00\x00\x00\x002@\x01\x00\x00\x00\x00\x00,@\x01\x00\x00\x00\x00\x00,@\x00\x00\x00\x00\x00\x00(@\x00\x00\x00\x00\x00\x00(@\x00\x00\x00\x00\x00\x00(@\x01\x00\x00\x00\x00\x00,@\x00\x00\x00\x00\x00\x00(@\x00\x00\x00\x00\x00\x00$@\x00\x00\x00\x00\x00\x00$@\x00\x00\x00\x00\x00\x000@\x00\x00\x00\x00\x00\x002@\x00\x00\x00\x00\x00\x002@\x00\x00\x00\x00\x00\x000@\x00\x00\x00\x00\x00\x00(@\x00\x00\x00\x00\x00\x00$@\x00\x00\x00\x00\x00\x00\x10@\x00\x00\x00\x00\x00\x00\x10@\x00\x00\x00\x00\x00\x00\x10@\x00\x00\x00\x00\x00\x00\x10@\x00\x00\x00\x00\x00\x00\x10@\x00\x00\x00\x00\x00\x00\x10@\x00\x00\x00\x00\x00\x000@\x00\x00\x00\x00\x00\x002@\x00\x00\x00\x00\x00\x002@\x00\x00\x00\x00\x00\x00$@\x00\x00\x00\x00\x00\x00\x10@\x00\x00\x00\x00\x00\x00\x00\x00\x00\x00\x00\x00\x00\x00\x00\x00\x00\x00\x00\x00\x00\x00\x00\x00\x00\x00\x00\x00\x00\x00\x00\x00\x00\x00\x00\x00\x00\x00\x00\x00\x00\x00\x00\x00\x00\x00\x00\x00\x00\x00\x00\x00\x00\x00\x00\x00\x00\x00\x00\x00\x00\x000@\x00\x00\x00\x00\x00\x006@\x00\x00\x00\x00\x00\x004@\x00\x00\x00\x00\x00\x00(@\x00\x00\x00\x00\x00\x00\x18@\x00\x00\x00\x00\x00\x00\x00@\x00\x00\x00\x00\x00\x00\x00@\x00\x00\x00\x00\x00\x00\x00@\x00\x00\x00\x00\x00\x00\x00@\x00\x00\x00\x00\x00\x00\x00@\x00\x00\x00\x00\x00\x00\x00@\x00\x00\x00\x00\x00\x00\x00\x00\x00\x00\x00\x00\x00\x000@\x00\x00\x00\x00\x00\x004@\x00\x00\x00\x00\x00\x004@\x00\x00\x00\x00\x00\x00 @\x00\x00\x00\x00\x00\x00\x00@\x00\x00\x00\x00\x00\x00\x00@\x00\x00\x00\x00\x00\x00\x00@\x00\x00\x00\x00\x00\x00\x00@\x00\x00\x00\x00\x00\x00\x00\x00\x00\x00\x00\x00\x00\x00\x00\x00\x00\x00\x00\x00\x00\x00\x00\x00\x00\x00\x00\x00\x00\x00\x00\x00\x00\x00\x00\x00\x00\x000@\x00\x00\x00\x00\x00\x006@\x00\x00\x00\x00\x00\x008@\x00\x00\x00\x00\x00\x004@\x00\x00\x00\x00\x00\x00$@\x00\x00\x00\x00\x00\x00\x10@\x00\x00\x00\x00\x00\x00\x10@\x00\x00\x00\x00\x00\x00\x10@\x00\x00\x00\x00\x00\x00\x00\x00\x00\x00\x00\x00\x00\x00\x00\x00\x00\x00\x00\x00\x00\x00\x00\x00\x00\x00\x00\x00\x00\x00\x00\x00\x00\x00\x00\x00\x00\x000@\x00\x00\x00\x00\x00\x000@\x00\x00\x00\x00\x00\x002@\x00\x00\x00\x00\x00\x002@\x00\x00\x00\x00\x00\x00 @\x00\x00\x00\x00\x00\x00$@\x00\x00\x00\x00\x00\x00$@\x00\x00\x00\x00\x00\x00 @\x00\x00\x00\x00\x00\x00\x18@\x00\x00\x00\x00\x00\x00\x10@\x00\x00\x00\x00\x00\x00\x00@\x00\x00\x00\x00\x00\x00\x00\x00\x00\x00\x00\x00\x00\x000@\x01\x00\x00\x00\x00\x00,@\x00\x00\x00\x00\x00\x00$@\x00\x00\x00\x00\x00\x00\x10@\x00\x00\x00\x00\x00\x00\x10@\x00\x00\x00\x00\x00\x00\x10@\x00\x00\x00\x00\x00\x00\x00@\x00\x00\x00\x00\x00\x00\x00\x00\x00\x00\x00\x00\x00\x00\x00\x00\x00\x00\x00\x00\x00\x00\x00\x00\x00\x00\x00\x00\x00\x00\x00\x00\x00\x00\x00\x00\x00\x00\x00\x00\x00\x00\x00\x00\x00\x000@\x00\x00\x00\x00\x00\x004@\x00\x00\x00\x00\x00\x008@\x00\x00\x00\x00\x00\x00:@\x00\x00\x00\x00\x00\x008@\x00\x00\x00\x00\x00\x00>@\x00\x00\x00\x00\x00\x00>@\x00\x00\x00\x00\x00\x00>@\x00\x00\x00\x00\x00\x00:@\x00\x00\x00\x00\x00\x002@\x00\x00\x00\x00\x00\x00(@\x00\x00\x00\x00\x00\x00 @\x00\x00\x00\x00\x00\x000@\x00\x00\x00\x00\x00\x006@\x00\x00\x00\x00\x00\x00:@\x00\x00\x00\x00\x00\x00>@\x00\x00\x00\x00\x00\x00>@\x00\x00\x00\x00\x00\x00A@\x00\x00\x00\x00\x00\x00A@\x00\x00\x00\x00\x00\x00A@\x00\x00\x00\x00\x00\x00A@\x00\x00\x00\x00\x00\x00B@\x00\x00\x00\x00\x00\x00A@\x00\x00\x00\x00\x00\x00@@\x00\x00\x00\x00\x00\x000@\x01\x00\x00\x00\x00\x00<@\x00\x00\x00\x00\x00\x00D@\x00\x00\x00\x00\x00\x00J@\x00\x00\x00\x00\x00\x80P@\x00\x00\x00\x00\x00\x00Q@\x00\x00\x00\x00\x00\x80R@\x00\x00\x00\x00\x00\x00S@\x00\x00\x00\x00\x00\x80T@\x00\x00\x00\x00\x00\x00V@\x00\x00\x00\x00\x00\x80U@\x00\x00\x00\x00\x00\x00U@\x00\x00\x00\x00\x00\x000@\x00\x00\x00\x00\x00\x008@\x00\x00\x00\x00\x00\x00B@\x00\x00\x00\x00\x00\x00G@\xff\xff\xff\xff\xff\xffL@\x00\x00\x00\x00\x00\x00P@\x00\x00\x00\x00\x00\x80Q@\x00\x00\x00\x00\x00\x80S@\x00\x00\x00\x00\x00\x80T@\x00\x00\x00\x00\x00\x00U@\x00\x00\x00\x00\x00\x80V@\x00\x00\x00\x00\x00\x00W@\x00\x00\x00\x00\x00\x000@\x00\x00\x00\x00\x00\x00:@\x00\x00\x00\x00\x00\x00A@\x00\x00\x00\x00\x00\x00G@\x00\x00\x00\x00\x00\x80P@\x00\x00\x00\x00\x00\x80Q@\x00\x00\x00\x00\x00\x00T@\x00\x00\x00\x00\x00\x00V@\x00\x00\x00\x00\x00\x80V@\x00\x00\x00\x00\x00\x80V@\x00\x00\x00\x00\x00\x00W@\x00\x00\x00\x00\x00\x00X@\x00\x00\x00\x00\x00\x00\x18@\x00\x00\x00\x00\x00\x00\x18@\x00\x00\x00\x00\x00\x00\x10@\x00\x00\x00\x00\x00\x00\x10@\x00\x00\x00\x00\x00\x00\x10@\x00\x00\x00\x00\x00\x00\x00@\x00\x00\x00\x00\x00\x00\x00@\x00\x00\x00\x00\x00\x00\x00@\x00\x00\x00\x00\x00\x00\x00@\x00\x00\x00\x00\x00\x00\x00@\x00\x00\x00\x00\x00\x00\x00\x00\x00\x00\x00\x00\x00\x00\x00\x00\x00\x00\x00\x00\x00\x00\x18@\x00\x00\x00\x00\x00\x00\x18@\x00\x00\x00\x00\x00\x00\x10@\x00\x00\x00\x00\x00\x00\x00\x00\x00\x00\x00\x00\x00\x00\x00\x00\x00\x00\x00\x00\x00\x00\x00\x00\x00\x00\x00\x00\x00\x00\x00\x00\x00\x00\x00\x00\x00\x00\x00\x00\x00\x00\x00\x00\x00\x00\x00\x00\x00\x00\x00\x00\x00\x00\x00\x00\x00\x00\x00\x00\x00\x00\x00\x00\x00\x00\x00\x00\x00\x00\x00\x00\x00\x00\x00\x00\x00\x00\x18@\x00\x00\x00\x00\x00\x00\x18@\x00\x00\x00\x00\x00\x00\x18@\x00\x00\x00\x00\x00\x00\x00@\x00\x00\x00\x00\x00\x00\x00\x00\x00\x00\x00\x00\x00\x00\x00\x00\x00\x00\x00\x00\x00\x00\x00\x00\x00\x00\x00\x00\x00\x00\x00\x00\x00\x00\x00\x00\x00\x00\x00\x00\x00\x00\x00\x00\x00\x00\x00\x00\x00\x00\x00\x00\x00\x00\x00\x00\x00\x00\x00\x00\x00\x00\x00\x00\x00\x00\x00\x00\x00\x00\x18@\x00\x00\x00\x00\x00\x00\x18@\x00\x00\x00\x00\x00\x00\x00@\x00\x00\x00\x00\x00\x00\x00\x00\x00\x00\x00\x00\x00\x00\x00\x00\x00\x00\x00\x00\x00\x00\x00\x00\x00\x00\x00\x00\x00\x00\x00\x00\x00\x00\x00\x00\x00\x00\x00\x00\x00\x00\x00\x00\x00\x00\x00\x00\x00\x00\x00\x00\x00\x00\x00\x00\x00\x00\x00\x00\x00\x00\x00\x00\x00\x00\x00\x00\x00\x00\x00\x00\x00\x00\x00\x00\x00\x00\x18@\x00\x00\x00\x00\x00\x00\x18@\x00\x00\x00\x00\x00\x00\x10@\x00\x00\x00\x00\x00\x00\x00\x00\x00\x00\x00\x00\x00\x00\x00\x00\x00\x00\x00\x00\x00\x00\x00\x00\x00\x00\x00\x00\x00\x00\x00\x00\x00\x00\x00\x00\x00\x00\x00\x00\x00\x00\x00\x00\x00\x00\x00\x00\x00\x00\x00\x00\x00\x00\x00\x00\x00\x00\x00\x00\x00\x00\x00\x00\x00\x00\x00\x00\x00\x00\x00\x00\x00\x00\x00\x00\x00\x00\x18@\x00\x00\x00\x00\x00\x00\x18@\x00\x00\x00\x00\x00\x00\x18@\x00\x00\x00\x00\x00\x00\x18@\x00\x00\x00\x00\x00\x00\x00\x00\x00\x00\x00\x00\x00\x00\x00\x00\x00\x00\x00\x00\x00\x00\x00\x00\x00\x00\x00\x00\x00\x00\x00\x00\x00\x00\x00\x00\x00\x00\x00\x00\x00\x00\x00\x00\x00\x00\x00\x00\x00\x00\x00\x00\x00\x00\x00\x00\x00\x00\x00\x00\x00\x00\x00\x00\x00\x00\x00\x00\x00\x00\x18@\x00\x00\x00\x00\x00\x00\x18@\x00\x00\x00\x00\x00\x00\x18@\x00\x00\x00\x00\x00\x00\x18@\x00\x00\x00\x00\x00\x00\x18@\x00\x00\x00\x00\x00\x00\x18@\x00\x00\x00\x00\x00\x00\x00\x00\x00\x00\x00\x00\x00\x00\x00\x00\x00\x00\x00\x00\x00\x00\x00\x00\x00\x00\x00\x00\x00\x00\x00\x00\x00\x00\x00\x00\x00\x00\x00\x00\x00\x00\x00\x00\x00\x00\x00\x00\x00\x00\x00\x00\x00\x00\x18@\x00\x00\x00\x00\x00\x00\x18@\x00\x00\x00\x00\x00\x00\x18@\x00\x00\x00\x00\x00\x00\x00\x00\x00\x00\x00\x00\x00\x00\x00\x00\x00\x00\x00\x00\x00\x00\x00\x00\x00\x00\x00\x00\x00\x00\x00\x00\x00\x00\x00\x00\x00\x00\x00\x00\x00\x00\x00\x00\x00\x00\x00\x00\x00\x00\x00\x00\x00\x00\x00\x00\x00\x00\x00\x00\x00\x00\x00\x00\x00\x00\x00\x00\x00\x00\x00\x00\x00\x00\x00\x00\x00\x00\x18@\x00\x00\x00\x00\x00\x00 @\x00\x00\x00\x00\x00\x00 @\x00\x00\x00\x00\x00\x00 @\x00\x00\x00\x00\x00\x00 @\x00\x00\x00\x00\x00\x00 @\x00\x00\x00\x00\x00\x00\x18@\x00\x00\x00\x00\x00\x00\x18@\x00\x00\x00\x00\x00\x00\x00@\x00\x00\x00\x00\x00\x00\x00\x00\x00\x00\x00\x00\x00\x00\x00\x00\x00\x00\x00\x00\x00\x00\x00\x00\x00\x00\x00\x00\x00\x00\x18@\x00\x00\x00\x00\x00\x00(@\x00\x00\x00\x00\x00\x002@\x00\x00\x00\x00\x00\x008@\x00\x00\x00\x00\x00\x00B@\x00\x00\x00\x00\x00\x00F@\x00\x00\x00\x00\x00\x00J@\x00\x00\x00\x00\x00\x00Q@\x00\x00\x00\x00\x00\x00S@\x00\x00\x00\x00\x00\x00T@\x00\x00\x00\x00\x00\x80T@\x00\x00\x00\x00\x00\x00V@\x00\x00\x00\x00\x00\x00\x18@\x00\x00\x00\x00\x00\x000@\x00\x00\x00\x00\x00\x00>@\x00\x00\x00\x00\x00\x00I@\x00\x00\x00\x00\x00\x00R@\x00\x00\x00\x00\x00\x00U@\x00\x00\x00\x00\x00\x80U@\x00\x00\x00\x00\x00\x80V@\x00\x00\x00\x00\x00\x80W@\x00\x00\x00\x00\x00\x00X@\x00\x00\x00\x00\x00\x00X@\x00\x00\x00\x00\x00\x00X@\x00\x00\x00\x00\x00\x00\x18@\x00\x00\x00\x00\x00\x000@\x00\x00\x00\x00\x00\x00G@\x00\x00\x00\x00\x00\x80P@\x00\x00\x00\x00\x00\x00U@\x00\x00\x00\x00\x00\x00X@\x00\x00\x00\x00\x00\x00Y@\x00\x00\x00\x00\x00\x00Y@\x00\x00\x00\x00\x00\x00Y@\x00\x00\x00\x00\x00\x00Y@\x00\x00\x00\x00\x00\x00Y@\x00\x00\x00\x00\x00\x00Y@\x00\x00\x00\x00\x00\x00\x18@\x00\x00\x00\x00\x00\x000@\x00\x00\x00\x00\x00\x00B@\x00\x00\x00\x00\x00\x00O@\x00\x00\x00\x00\x00\x00U@\x00\x00\x00\x00\x00\x80X@\x00\x00\x00\x00\x00\x80X@\x00\x00\x00\x00\x00\x00Y@\x00\x00\x00\x00\x00\x00Y@\x00\x00\x00\x00\x00\x00Y@\x00\x00\x00\x00\x00\x00Y@\x00\x00\x00\x00\x00\x00Y@\x00\x00\x00\x00\x00\x00S@\x00\x00\x00\x00\x00\x80R@\x00\x00\x00\x00\x00\x00R@\x00\x00\x00\x00\x00\x80P@\x00\x00\x00\x00\x00\x00P@\x01\x00\x00\x00\x00\x00L@\x01\x00\x00\x00\x00\x00L@\x00\x00\x00\x00\x00\x80P@\x00\x00\x00\x00\x00\x80Q@\x00\x00\x00\x00\x00\x80Q@\x00\x00\x00\x00\x00\x80Q@\x00\x00\x00\x00\x00\x80Q@\x00\x00\x00\x00\x00\x00S@\x00\x00\x00\x00\x00\x80S@\x00\x00\x00\x00\x00\x80S@\x00\x00\x00\x00\x00\x80R@\x00\x00\x00\x00\x00\x00R@\x00\x00\x00\x00\x00\x80R@\x00\x00\x00\x00\x00\x80Q@\x00\x00\x00\x00\x00\x00Q@\x00\x00\x00\x00\x00\x00R@\x00\x00\x00\x00\x00\x00R@\x00\x00\x00\x00\x00\x80S@\x00\x00\x00\x00\x00\x80S@\x00\x00\x00\x00\x00\x00S@\x00\x00\x00\x00\x00\x80S@\x00\x00\x00\x00\x00\x00S@\x00\x00\x00\x00\x00\x80Q@\x00\x00\x00\x00\x00\x00R@\x00\x00\x00\x00\x00\x80R@\x00\x00\x00\x00\x00\x80S@\x00\x00\x00\x00\x00\x00T@\x00\x00\x00\x00\x00\x00U@\x00\x00\x00\x00\x00\x00U@\x00\x00\x00\x00\x00\x80U@\x00\x00\x00\x00\x00\x80U@\x00\x00\x00\x00\x00\x00S@\x00\x00\x00\x00\x00\x80T@\x00\x00\x00\x00\x00\x80V@\x00\x00\x00\x00\x00\x00W@\x00\x00\x00\x00\x00\x80X@\x00\x00\x00\x00\x00\x80X@\x00\x00\x00\x00\x00\x80X@\x00\x00\x00\x00\x00\x80X@\x00\x00\x00\x00\x00\x80X@\x00\x00\x00\x00\x00\x80X@\x00\x00\x00\x00\x00\x80X@\x00\x00\x00\x00\x00\x00X@\x00\x00\x00\x00\x00\x00S@\x00\x00\x00\x00\x00\x80T@\x00\x00\x00\x00\x00\x80W@\x00\x00\x00\x00\x00\x80W@\x00\x00\x00\x00\x00\x80X@\x00\x00\x00\x00\x00\x80X@\x00\x00\x00\x00\x00\x80X@\x00\x00\x00\x00\x00\x80X@\x00\x00\x00\x00\x00\x00X@\x00\x00\x00\x00\x00\x00X@\x00\x00\x00\x00\x00\x00X@\x00\x00\x00\x00\x00\x00X@\x00\x00\x00\x00\x00\x00S@\x00\x00\x00\x00\x00\x00U@\x00\x00\x00\x00\x00\x00V@\x00\x00\x00\x00\x00\x80W@\x00\x00\x00\x00\x00\x00W@\x00\x00\x00\x00\x00\x00W@\x00\x00\x00\x00\x00\x00W@\x00\x00\x00\x00\x00\x00X@\x00\x00\x00\x00\x00\x00X@\x00\x00\x00\x00\x00\x00X@\x00\x00\x00\x00\x00\x00X@\x00\x00\x00\x00\x00\x00X@\x00\x00\x00\x00\x00\x00S@\x00\x00\x00\x00\x00\x80T@\x00\x00\x00\x00\x00\x00U@\x00\x00\x00\x00\x00\x80V@\x00\x00\x00\x00\x00\x80V@\x00\x00\x00\x00\x00\x80W@\x00\x00\x00\x00\x00\x00X@\x00\x00\x00\x00\x00\x00X@\x00\x00\x00\x00\x00\x00X@\x00\x00\x00\x00\x00\x00X@\x00\x00\x00\x00\x00\x80X@\x00\x00\x00\x00\x00\x80X@\x00\x00\x00\x00\x00\x00S@\x00\x00\x00\x00\x00\x80T@\x00\x00\x00\x00\x00\x00W@\x00\x00\x00\x00\x00\x00X@\x00\x00\x00\x00\x00\x00X@\x00\x00\x00\x00\x00\x80X@\x00\x00\x00\x00\x00\x00Y@\x00\x00\x00\x00\x00\x00Y@\x00\x00\x00\x00\x00\x00X@\x00\x00\x00\x00\x00\x00X@\x00\x00\x00\x00\x00\x00X@\x00\x00\x00\x00\x00\x00W@\x00\x00\x00\x00\x00\x00S@\x00\x00\x00\x00\x00\x80T@\x00\x00\x00\x00\x00\x00V@\x00\x00\x00\x00\x00\x80V@\x00\x00\x00\x00\x00\x00W@\x00\x00\x00\x00\x00\x00X@\x00\x00\x00\x00\x00\x00X@\x00\x00\x00\x00\x00\x80W@\x00\x00\x00\x00\x00\x00V@\x00\x00\x00\x00\x00\x80U@\x00\x00\x00\x00\x00\x00T@\x00\x00\x00\x00\x00\x00S@\x00\x00\x00\x00\x00\x00S@\x00\x00\x00\x00\x00\x80T@\x00\x00\x00\x00\x00\x00W@\x00\x00\x00\x00\x00\x00X@\x00\x00\x00\x00\x00\x00X@\x00\x00\x00\x00\x00\x00X@\x00\x00\x00\x00\x00\x00X@\x00\x00\x00\x00\x00\x00X@\x00\x00\x00\x00\x00\x00X@\x00\x00\x00\x00\x00\x00X@\x00\x00\x00\x00\x00\x00X@\x00\x00\x00\x00\x00\x00X@\x00\x00\x00\x00\x00\x00S@\x00\x00\x00\x00\x00\x80T@\x00\x00\x00\x00\x00\x80V@\x00\x00\x00\x00\x00\x80X@\x00\x00\x00\x00\x00\x80X@\x00\x00\x00\x00\x00\x00Y@\x00\x00\x00\x00\x00\x00Y@\x00\x00\x00\x00\x00\x80X@\x00\x00\x00\x00\x00\x00X@\x00\x00\x00\x00\x00\x00X@\x00\x00\x00\x00\x00\x00X@\x00\x00\x00\x00\x00\x00X@\x00\x00\x00\x00\x00\x00S@\x00\x00\x00\x00\x00\x00U@\x00\x00\x00\x00\x00\x80W@\x00\x00\x00\x00\x00\x00Y@\x00\x00\x00\x00\x00\x00Y@\x00\x00\x00\x00\x00\x00Y@\x00\x00\x00\x00\x00\x00Y@\x00\x00\x00\x00\x00\x00Y@\x00\x00\x00\x00\x00\x00Y@\x00\x00\x00\x00\x00\x00Y@\x00\x00\x00\x00\x00\x00Y@\x00\x00\x00\x00\x00\x00Y@\x00\x00\x00\x00\x00\x00S@\x00\x00\x00\x00\x00\x80T@\x00\x00\x00\x00\x00\x80U@\x00\x00\x00\x00\x00\x00W@\x00\x00\x00\x00\x00\x00Y@\x00\x00\x00\x00\x00\x00Y@\x00\x00\x00\x00\x00\x00Y@\x00\x00\x00\x00\x00\x00Y@\x00\x00\x00\x00\x00\x00Y@\x00\x00\x00\x00\x00\x00Y@\x00\x00\x00\x00\x00\x00Y@\x00\x00\x00\x00\x00\x00Y@\x00\x00\x00\x00\x00\x80Q@\x00\x00\x00\x00\x00\x80Q@\x00\x00\x00\x00\x00\x80P@\x00\x00\x00\x00\x00\x00P@\x00\x00\x00\x00\x00\x00O@\x00\x00\x00\x00\x00\x00N@\x00\x00\x00\x00\x00\x00N@\x00\x00\x00\x00\x00\x00N@\x00\x00\x00\x00\x00\x00O@\x00\x00\x00\x00\x00\x80P@\x00\x00\x00\x00\x00\x80P@\x00\x00\x00\x00\x00\x80Q@\x00\x00\x00\x00\x00\x80Q@\x00\x00\x00\x00\x00\x80Q@\x00\x00\x00\x00\x00\x80P@\x00\x00\x00\x00\x00\x00O@\x00\x00\x00\x00\x00\x00P@\x00\x00\x00\x00\x00\x00P@\x00\x00\x00\x00\x00\x00P@\x00\x00\x00\x00\x00\x00Q@\x00\x00\x00\x00\x00\x00S@\x00\x00\x00\x00\x00\x00S@\x00\x00\x00\x00\x00\x00S@\x00\x00\x00\x00\x00\x00T@\x00\x00\x00\x00\x00\x80Q@\x00\x00\x00\x00\x00\x80P@\x00\x00\x00\x00\x00\x00N@\x00\x00\x00\x00\x00\x80Q@\x00\x00\x00\x00\x00\x80P@\x00\x00\x00\x00\x00\x00P@\x00\x00\x00\x00\x00\x80P@\x00\x00\x00\x00\x00\x00Q@\x00\x00\x00\x00\x00\x80P@\x00\x00\x00\x00\x00\x00P@\x00\x00\x00\x00\x00\x80P@\x00\x00\x00\x00\x00\x80Q@\x00\x00\x00\x00\x00\x80Q@\xff\xff\xff\xff\xff\xffL@\x00\x00\x00\x00\x00\x00J@\x00\x00\x00\x00\x00\x00K@\x00\x00\x00\x00\x00\x00R@\x00\x00\x00\x00\x00\x80U@\x00\x00\x00\x00\x00\x00V@\x00\x00\x00\x00\x00\x00W@\x00\x00\x00\x00\x00\x80W@\x00\x00\x00\x00\x00\x80X@\x00\x00\x00\x00\x00\x80X@\x00\x00\x00\x00\x00\x80X@\x00\x00\x00\x00\x00\x80Q@\x00\x00\x00\x00\x00\x00I@\x00\x00\x00\x00\x00\x00J@\x01\x00\x00\x00\x00\x00L@\xff\xff\xff\xff\xff\xffL@\x00\x00\x00\x00\x00\x00O@\x00\x00\x00\x00\x00\x00Q@\x00\x00\x00\x00\x00\x80R@\x00\x00\x00\x00\x00\x00S@\x00\x00\x00\x00\x00\x80S@\x00\x00\x00\x00\x00\x00T@\x00\x00\x00\x00\x00\x80U@\x00\x00\x00\x00\x00\x80Q@\x00\x00\x00\x00\x00\x00K@\x00\x00\x00\x00\x00\x00I@\x00\x00\x00\x00\x00\x00J@\x01\x00\x00\x00\x00\x00L@\x00\x00\x00\x00\x00\x00O@\x00\x00\x00\x00\x00\x80R@\x00\x00\x00\x00\x00\x00S@\x00\x00\x00\x00\x00\x80S@\x00\x00\x00\x00\x00\x00T@\x00\x00\x00\x00\x00\x80T@\x00\x00\x00\x00\x00\x80U@\x00\x00\x00\x00\x00\x80Q@\x00\x00\x00\x00\x00\x00J@\x00\x00\x00\x00\x00\x00E@\x00\x00\x00\x00\x00\x00@@\x00\x00\x00\x00\x00\x00@@\x00\x00\x00\x00\x00\x00D@\x00\x00\x00\x00\x00\x00D@\x00\x00\x00\x00\x00\x00I@\x01\x00\x00\x00\x00\x00L@\x00\x00\x00\x00\x00\x80P@\x00\x00\x00\x00\x00\x00S@\x00\x00\x00\x00\x00\x80S@\x00\x00\x00\x00\x00\x80Q@\xff\xff\xff\xff\xff\xffL@\x00\x00\x00\x00\x00\x00J@\x00\x00\x00\x00\x00\x00H@\x00\x00\x00\x00\x00\x00K@\x00\x00\x00\x00\x00\x00J@\x00\x00\x00\x00\x00\x00J@\x01\x00\x00\x00\x00\x00L@\x00\x00\x00\x00\x00\x00N@\x00\x00\x00\x00\x00\x00N@\x00\x00\x00\x00\x00\x00P@\x00\x00\x00\x00\x00\x00O@\x00\x00\x00\x00\x00\x80Q@\x00\x00\x00\x00\x00\x00P@\x00\x00\x00\x00\x00\x00K@\x00\x00\x00\x00\x00\x00I@\x00\x00\x00\x00\x00\x00G@\x00\x00\x00\x00\x00\x00D@\x00\x00\x00\x00\x00\x00D@\x00\x00\x00\x00\x00\x00D@\x00\x00\x00\x00\x00\x00F@\x00\x00\x00\x00\x00\x00E@\x00\x00\x00\x00\x00\x00E@\x00\x00\x00\x00\x00\x00E@\x00\x00\x00\x00\x00\x80Q@\x00\x00\x00\x00\x00\x00K@\x00\x00\x00\x00\x00\x00C@\x00\x00\x00\x00\x00\x00@@\x00\x00\x00\x00\x00\x008@\x00\x00\x00\x00\x00\x004@\x00\x00\x00\x00\x00\x006@\x00\x00\x00\x00\x00\x000@\x00\x00\x00\x00\x00\x00(@\x00\x00\x00\x00\x00\x00(@\x00\x00\x00\x00\x00\x00$@\x00\x00\x00\x00\x00\x00$@\x00\x00\x00\x00\x00\x80Q@\xff\xff\xff\xff\xff\xffL@\x00\x00\x00\x00\x00\x00G@\x00\x00\x00\x00\x00\x00D@\x00\x00\x00\x00\x00\x00@@\x00\x00\x00\x00\x00\x008@\x00\x00\x00\x00\x00\x004@\x00\x00\x00\x00\x00\x004@\x00\x00\x00\x00\x00\x004@\x00\x00\x00\x00\x00\x004@\x00\x00\x00\x00\x00\x002@\x00\x00\x00\x00\x00\x002@\x00\x00\x00\x00\x00\x80Q@\x00\x00\x00\x00\x00\x00F@\x01\x00\x00\x00\x00\x00<@\x00\x00\x00\x00\x00\x00:@\x01\x00\x00\x00\x00\x00,@\x00\x00\x00\x00\x00\x00(@\x00\x00\x00\x00\x00\x00\x18@\x00\x00\x00\x00\x00\x00\x10@\x00\x00\x00\x00\x00\x00\x00@\x00\x00\x00\x00\x00\x00\x00@\x00\x00\x00\x00\x00\x00\x00@\x00\x00\x00\x00\x00\x00\x00@\x00\x00\x00\x00\x00\x80Q@\x00\x00\x00\x00\x00\x00K@\x00\x00\x00\x00\x00\x00@@\x00\x00\x00\x00\x00\x00:@\x00\x00\x00\x00\x00\x000@\x00\x00\x00\x00\x00\x00$@\x00\x00\x00\x00\x00\x00\x10@\x00\x00\x00\x00\x00\x00\x00@\x00\x00\x00\x00\x00\x00\x00\x00\x00\x00\x00\x00\x00\x00\x00\x00\x00\x00\x00\x00\x00\x00\x00\x00\x00\x00\x00\x00\x00\x00\x00\x00\x00\x00\x00\x00\x00\x00Y@\x00\x00\x00\x00\x00\x00Y@\x00\x00\x00\x00\x00\x00Y@\x00\x00\x00\x00\x00\x00Y@\x00\x00\x00\x00\x00\x00Y@\x00\x00\x00\x00\x00\x00Y@\x00\x00\x00\x00\x00\x00Y@\x00\x00\x00\x00\x00\x00Y@\x00\x00\x00\x00\x00\x00Y@\x00\x00\x00\x00\x00\x00Y@\x00\x00\x00\x00\x00\x00Y@\x00\x00\x00\x00\x00\x00Y@\x00\x00\x00\x00\x00\x00Y@\x00\x00\x00\x00\x00\x00Y@\x00\x00\x00\x00\x00\x00Y@\x00\x00\x00\x00\x00\x00Y@\x00\x00\x00\x00\x00\x00Y@\x00\x00\x00\x00\x00\x00Y@\x00\x00\x00\x00\x00\x00Y@\x00\x00\x00\x00\x00\x00Y@\x00\x00\x00\x00\x00\x00Y@\x00\x00\x00\x00\x00\x00Y@\x00\x00\x00\x00\x00\x00Y@\x00\x00\x00\x00\x00\x00Y@\x00\x00\x00\x00\x00\x00Y@\x00\x00\x00\x00\x00\x00Y@\x00\x00\x00\x00\x00\x00Y@\x00\x00\x00\x00\x00\x00Y@\x00\x00\x00\x00\x00\x00Y@\x00\x00\x00\x00\x00\x00Y@\x00\x00\x00\x00\x00\x00Y@\x00\x00\x00\x00\x00\x00Y@\x00\x00\x00\x00\x00\x00Y@\x00\x00\x00\x00\x00\x00Y@\x00\x00\x00\x00\x00\x00Y@\x00\x00\x00\x00\x00\x00Y@\x00\x00\x00\x00\x00\x00Y@\x00\x00\x00\x00\x00\x00Y@\x00\x00\x00\x00\x00\x00Y@\x00\x00\x00\x00\x00\x00Y@\x00\x00\x00\x00\x00\x00Y@\x00\x00\x00\x00\x00\x00Y@\x00\x00\x00\x00\x00\x00Y@\x00\x00\x00\x00\x00\x00Y@\x00\x00\x00\x00\x00\x00Y@\x00\x00\x00\x00\x00\x00Y@\x00\x00\x00\x00\x00\x00Y@\x00\x00\x00\x00\x00\x00Y@\x00\x00\x00\x00\x00\x00Y@\x00\x00\x00\x00\x00\x00Y@\x00\x00\x00\x00\x00\x00Y@\x00\x00\x00\x00\x00\x00Y@\x00\x00\x00\x00\x00\x00Y@\x00\x00\x00\x00\x00\x00Y@\x00\x00\x00\x00\x00\x00Y@\x00\x00\x00\x00\x00\x00Y@\x00\x00\x00\x00\x00\x00Y@\x00\x00\x00\x00\x00\x00Y@\x00\x00\x00\x00\x00\x00Y@\x00\x00\x00\x00\x00\x00Y@\x00\x00\x00\x00\x00\x00Y@\x00\x00\x00\x00\x00\x00Y@\x00\x00\x00\x00\x00\x00Y@\x00\x00\x00\x00\x00\x00Y@\x00\x00\x00\x00\x00\x00Y@\x00\x00\x00\x00\x00\x00Y@\x00\x00\x00\x00\x00\x00Y@\x00\x00\x00\x00\x00\x00Y@\x00\x00\x00\x00\x00\x00Y@\x00\x00\x00\x00\x00\x00Y@\x00\x00\x00\x00\x00\x00Y@\x00\x00\x00\x00\x00\x00Y@\x00\x00\x00\x00\x00\x00Y@\x00\x00\x00\x00\x00\x00Y@\x00\x00\x00\x00\x00\x00Y@\x00\x00\x00\x00\x00\x00Y@\x00\x00\x00\x00\x00\x00Y@\x00\x00\x00\x00\x00\x00Y@\x00\x00\x00\x00\x00\x00Y@\x00\x00\x00\x00\x00\x00Y@\x00\x00\x00\x00\x00\x00Y@\x00\x00\x00\x00\x00\x00Y@\x00\x00\x00\x00\x00\x00Y@\x00\x00\x00\x00\x00\x00Y@\x00\x00\x00\x00\x00\x00Y@\x00\x00\x00\x00\x00\x00Y@\x00\x00\x00\x00\x00\x00Y@\x00\x00\x00\x00\x00\x00Y@\x00\x00\x00\x00\x00\x00Y@\x00\x00\x00\x00\x00\x80X@\x00\x00\x00\x00\x00\x80X@\x00\x00\x00\x00\x00\x80X@\x00\x00\x00\x00\x00\x80X@\x00\x00\x00\x00\x00\x80X@\x00\x00\x00\x00\x00\x80X@\x00\x00\x00\x00\x00\x80X@\x00\x00\x00\x00\x00\x00Y@\x00\x00\x00\x00\x00\x00Y@\x00\x00\x00\x00\x00\x80X@\x00\x00\x00\x00\x00\x00X@\x00\x00\x00\x00\x00\x00X@\x00\x00\x00\x00\x00\x80V@\x00\x00\x00\x00\x00\x80U@\x00\x00\x00\x00\x00\x80T@\x00\x00\x00\x00\x00\x00T@\x00\x00\x00\x00\x00\x00S@\x00\x00\x00\x00\x00\x00R@\x00\x00\x00\x00\x00\x80Q@\x00\x00\x00\x00\x00\x00Y@\x00\x00\x00\x00\x00\x00Y@\x00\x00\x00\x00\x00\x00Y@\x00\x00\x00\x00\x00\x80W@\x00\x00\x00\x00\x00\x80U@\x00\x00\x00\x00\x00\x00R@\x00\x00\x00\x00\x00\x00N@\x01\x00\x00\x00\x00\x00L@\x00\x00\x00\x00\x00\x00G@\x00\x00\x00\x00\x00\x00E@\x00\x00\x00\x00\x00\x00C@\x00\x00\x00\x00\x00\x00B@\x00\x00\x00\x00\x00\x00Y@\x00\x00\x00\x00\x00\x00Y@\x00\x00\x00\x00\x00\x00Y@\x00\x00\x00\x00\x00\x00Y@\x00\x00\x00\x00\x00\x80X@\x00\x00\x00\x00\x00\x80W@\x00\x00\x00\x00\x00\x00W@\x00\x00\x00\x00\x00\x80S@\x00\x00\x00\x00\x00\x00R@\x00\x00\x00\x00\x00\x00Q@\x00\x00\x00\x00\x00\x00P@\x00\x00\x00\x00\x00\x00O@\x00\x00\x00\x00\x00\x00Y@\x00\x00\x00\x00\x00\x00Y@\x00\x00\x00\x00\x00\x00X@\x00\x00\x00\x00\x00\x80T@\x00\x00\x00\x00\x00\x00N@\x00\x00\x00\x00\x00\x00F@\x00\x00\x00\x00\x00\x00:@\x00\x00\x00\x00\x00\x000@\x01\x00\x00\x00\x00\x00,@\x00\x00\x00\x00\x00\x00 @\x00\x00\x00\x00\x00\x00\x18@\x00\x00\x00\x00\x00\x00\x00\x00\x00\x00\x00\x00\x00\x00Y@\x00\x00\x00\x00\x00\x00Y@\x00\x00\x00\x00\x00\x00Y@\x00\x00\x00\x00\x00\x80X@\x00\x00\x00\x00\x00\x80W@\x00\x00\x00\x00\x00\x00S@\x00\x00\x00\x00\x00\x00P@\x00\x00\x00\x00\x00\x00J@\x00\x00\x00\x00\x00\x00D@\x00\x00\x00\x00\x00\x008@\x00\x00\x00\x00\x00\x000@\x00\x00\x00\x00\x00\x00$@\x00\x00\x00\x00\x00\x80X@\x00\x00\x00\x00\x00\x80X@\x00\x00\x00\x00\x00\x00Y@\x00\x00\x00\x00\x00\x00Y@\x00\x00\x00\x00\x00\x00Y@\x00\x00\x00\x00\x00\x00Y@\x00\x00\x00\x00\x00\x00Y@\x00\x00\x00\x00\x00\x00Y@\x00\x00\x00\x00\x00\x00Y@\x00\x00\x00\x00\x00\x00Y@\x00\x00\x00\x00\x00\x00Y@\x00\x00\x00\x00\x00\x00Y@\x00\x00\x00\x00\x00\x80X@\x00\x00\x00\x00\x00\x00Y@\x00\x00\x00\x00\x00\x00Y@\x00\x00\x00\x00\x00\x00Y@\x00\x00\x00\x00\x00\x00Y@\x00\x00\x00\x00\x00\x00Y@\x00\x00\x00\x00\x00\x00Y@\x00\x00\x00\x00\x00\x80X@\x00\x00\x00\x00\x00\x80X@\x00\x00\x00\x00\x00\x80X@\x00\x00\x00\x00\x00\x80X@\x00\x00\x00\x00\x00\x80X@\x00\x00\x00\x00\x00\x80X@\x00\x00\x00\x00\x00\x80X@\x00\x00\x00\x00\x00\x00Y@\x00\x00\x00\x00\x00\x00Y@\x00\x00\x00\x00\x00\x00Y@\x00\x00\x00\x00\x00\x00Y@\x00\x00\x00\x00\x00\x00Y@\x00\x00\x00\x00\x00\x00Y@\x00\x00\x00\x00\x00\x80X@\x00\x00\x00\x00\x00\x00X@\x00\x00\x00\x00\x00\x00X@\x00\x00\x00\x00\x00\x80W@\x00\x00\x00\x00\x00\x80X@\x00\x00\x00\x00\x00\x80X@\x00\x00\x00\x00\x00\x80X@\x00\x00\x00\x00\x00\x80X@\x00\x00\x00\x00\x00\x80W@\x00\x00\x00\x00\x00\x80W@\x00\x00\x00\x00\x00\x80W@\x00\x00\x00\x00\x00\x80V@\x00\x00\x00\x00\x00\x80T@\x00\x00\x00\x00\x00\x80S@\x00\x00\x00\x00\x00\x80R@\x00\x00\x00\x00\x00\x80P@\x00\x00\x00\x00\x00\x80X@\x00\x00\x00\x00\x00\x80X@\x00\x00\x00\x00\x00\x00X@\x00\x00\x00\x00\x00\x80W@\x00\x00\x00\x00\x00\x00X@\x00\x00\x00\x00\x00\x00X@\x00\x00\x00\x00\x00\x80W@\x00\x00\x00\x00\x00\x80W@\x00\x00\x00\x00\x00\x80W@\x00\x00\x00\x00\x00\x00W@\x00\x00\x00\x00\x00\x00W@\x00\x00\x00\x00\x00\x00W@\x00\x00\x00\x00\x00\x80X@\x00\x00\x00\x00\x00\x80X@\x00\x00\x00\x00\x00\x00X@\x00\x00\x00\x00\x00\x80X@\x00\x00\x00\x00\x00\x00X@\x00\x00\x00\x00\x00\x00X@\x00\x00\x00\x00\x00\x00X@\x00\x00\x00\x00\x00\x00X@\x00\x00\x00\x00\x00\x00X@\x00\x00\x00\x00\x00\x80W@\x00\x00\x00\x00\x00\x80W@\x00\x00\x00\x00\x00\x00W@\x00\x00\x00\x00\x00\x80X@\x00\x00\x00\x00\x00\x80X@\x00\x00\x00\x00\x00\x80W@\x00\x00\x00\x00\x00\x80V@\x00\x00\x00\x00\x00\x80V@\x00\x00\x00\x00\x00\x00W@\x00\x00\x00\x00\x00\x80W@\x00\x00\x00\x00\x00\x80W@\x00\x00\x00\x00\x00\x80W@\x00\x00\x00\x00\x00\x80W@\x00\x00\x00\x00\x00\x80W@\x00\x00\x00\x00\x00\x80W@\x00\x00\x00\x00\x00\x80X@\x00\x00\x00\x00\x00\x80X@\x00\x00\x00\x00\x00\x80X@\x00\x00\x00\x00\x00\x80X@\x00\x00\x00\x00\x00\x80X@\x00\x00\x00\x00\x00\x00X@\x00\x00\x00\x00\x00\x00X@\x00\x00\x00\x00\x00\x00X@\x00\x00\x00\x00\x00\x00X@\x00\x00\x00\x00\x00\x80W@\x00\x00\x00\x00\x00\x80W@\x00\x00\x00\x00\x00\x80V@\x00\x00\x00\x00\x00\x80X@\x00\x00\x00\x00\x00\x80X@\x00\x00\x00\x00\x00\x80X@\x00\x00\x00\x00\x00\x80W@\x00\x00\x00\x00\x00\x80W@\x00\x00\x00\x00\x00\x80W@\x00\x00\x00\x00\x00\x80V@\x00\x00\x00\x00\x00\x80V@\x00\x00\x00\x00\x00\x80V@\x00\x00\x00\x00\x00\x80V@\x00\x00\x00\x00\x00\x00V@\x00\x00\x00\x00\x00\x00V@\x00\x00\x00\x00\x00\x80X@\x00\x00\x00\x00\x00\x80X@\x00\x00\x00\x00\x00\x00W@\x00\x00\x00\x00\x00\x80V@\x00\x00\x00\x00\x00\x80U@\x00\x00\x00\x00\x00\x00T@\x00\x00\x00\x00\x00\x80R@\x00\x00\x00\x00\x00\x00R@\x00\x00\x00\x00\x00\x00R@\x00\x00\x00\x00\x00\x80Q@\x00\x00\x00\x00\x00\x80P@\x00\x00\x00\x00\x00\x00P@\x00\x00\x00\x00\x00\x80X@\x00\x00\x00\x00\x00\x80X@\x00\x00\x00\x00\x00\x80X@\x00\x00\x00\x00\x00\x80W@\x00\x00\x00\x00\x00\x00W@\x00\x00\x00\x00\x00\x80V@\x00\x00\x00\x00\x00\x80U@\x00\x00\x00\x00\x00\x80S@\x00\x00\x00\x00\x00\x00R@\x00\x00\x00\x00\x00\x80Q@\x00\x00\x00\x00\x00\x00Q@\x00\x00\x00\x00\x00\x80Q@\x00\x00\x00\x00\x00\x80X@\x00\x00\x00\x00\x00\x80X@\x00\x00\x00\x00\x00\x80W@\x00\x00\x00\x00\x00\x80U@\x00\x00\x00\x00\x00\x80U@\x00\x00\x00\x00\x00\x80T@\x00\x00\x00\x00\x00\x80Q@\x00\x00\x00\x00\x00\x00Q@\x00\x00\x00\x00\x00\x00P@\x01\x00\x00\x00\x00\x00L@\x01\x00\x00\x00\x00\x00L@\x00\x00\x00\x00\x00\x00K@\x00\x00\x00\x00\x00\x80X@\x00\x00\x00\x00\x00\x80X@\x00\x00\x00\x00\x00\x80X@\x00\x00\x00\x00\x00\x00X@\x00\x00\x00\x00\x00\x00T@\x00\x00\x00\x00\x00\x80S@\x00\x00\x00\x00\x00\x00O@\xff\xff\xff\xff\xff\xffL@\x00\x00\x00\x00\x00\x00K@\x00\x00\x00\x00\x00\x00I@\x00\x00\x00\x00\x00\x00G@\x00\x00\x00\x00\x00\x00D@\x00\x00\x00\x00\x00\x80X@\x00\x00\x00\x00\x00\x00X@\x00\x00\x00\x00\x00\x00X@\x00\x00\x00\x00\x00\x00X@\x00\x00\x00\x00\x00\x00X@\x00\x00\x00\x00\x00\x00X@\x00\x00\x00\x00\x00\x00X@\x00\x00\x00\x00\x00\x00X@\x00\x00\x00\x00\x00\x00X@\x00\x00\x00\x00\x00\x00X@\x00\x00\x00\x00\x00\x00X@\x00\x00\x00\x00\x00\x80W@\x00\x00\x00\x00\x00\x80X@\x00\x00\x00\x00\x00\x00X@\x00\x00\x00\x00\x00\x00X@\x00\x00\x00\x00\x00\x80X@\x00\x00\x00\x00\x00\x00X@\x00\x00\x00\x00\x00\x00X@\x00\x00\x00\x00\x00\x00X@\x00\x00\x00\x00\x00\x00X@\x00\x00\x00\x00\x00\x00X@\x00\x00\x00\x00\x00\x00X@\x00\x00\x00\x00\x00\x00Y@\x00\x00\x00\x00\x00\x00Y@\x00\x00\x00\x00\x00\x80X@\x00\x00\x00\x00\x00\x00Y@\x00\x00\x00\x00\x00\x00Y@\x00\x00\x00\x00\x00\x00X@\x00\x00\x00\x00\x00\x00V@\x00\x00\x00\x00\x00\x80V@\x00\x00\x00\x00\x00\x80V@\x00\x00\x00\x00\x00\x80V@\x00\x00\x00\x00\x00\x00W@\x00\x00\x00\x00\x00\x00V@\x00\x00\x00\x00\x00\x80T@\x00\x00\x00\x00\x00\x00S@\x00\x00\x00\x00\x00\x80X@\x00\x00\x00\x00\x00\x00X@\x00\x00\x00\x00\x00\x80W@\x00\x00\x00\x00\x00\x00W@\x00\x00\x00\x00\x00\x80U@\x00\x00\x00\x00\x00\x80T@\x00\x00\x00\x00\x00\x00S@\x00\x00\x00\x00\x00\x80R@\x00\x00\x00\x00\x00\x00P@\x01\x00\x00\x00\x00\x00L@\x00\x00\x00\x00\x00\x00I@\x00\x00\x00\x00\x00\x00E@\x00\x00\x00\x00\x00\x80X@\x00\x00\x00\x00\x00\x00X@\x00\x00\x00\x00\x00\x80V@\x00\x00\x00\x00\x00\x00Q@\x00\x00\x00\x00\x00\x00G@\x00\x00\x00\x00\x00\x002@\x00\x00\x00\x00\x00\x00$@\x00\x00\x00\x00\x00\x00\x18@\x00\x00\x00\x00\x00\x00\x18@\x00\x00\x00\x00\x00\x00\x00@\x00\x00\x00\x00\x00\x00\x00@\x00\x00\x00\x00\x00\x00\x10@\x00\x00\x00\x00\x00\x80X@\x00\x00\x00\x00\x00\x00X@\x00\x00\x00\x00\x00\x80V@\x00\x00\x00\x00\x00\x80R@\x00\x00\x00\x00\x00\x00H@\x00\x00\x00\x00\x00\x00@@\x00\x00\x00\x00\x00\x002@\x00\x00\x00\x00\x00\x00$@\x00\x00\x00\x00\x00\x00 @\x00\x00\x00\x00\x00\x00\x10@\x00\x00\x00\x00\x00\x00\x00@\x00\x00\x00\x00\x00\x00\x00\x00\x00\x00\x00\x00\x00\x80X@\x00\x00\x00\x00\x00\x00X@\x00\x00\x00\x00\x00\x00W@\x00\x00\x00\x00\x00\x80U@\x00\x00\x00\x00\x00\x00R@\xff\xff\xff\xff\xff\xffL@\x00\x00\x00\x00\x00\x00I@\x00\x00\x00\x00\x00\x00C@\x00\x00\x00\x00\x00\x008@\x00\x00\x00\x00\x00\x008@\x00\x00\x00\x00\x00\x002@\x01\x00\x00\x00\x00\x00,@\x00\x00\x00\x00\x00\x80X@\x00\x00\x00\x00\x00\x00X@\x00\x00\x00\x00\x00\x80W@\x00\x00\x00\x00\x00\x00V@\x00\x00\x00\x00\x00\x00R@\x00\x00\x00\x00\x00\x80P@\xff\xff\xff\xff\xff\xffL@\x00\x00\x00\x00\x00\x00E@\x00\x00\x00\x00\x00\x00B@\x01\x00\x00\x00\x00\x00<@\x00\x00\x00\x00\x00\x004@\x00\x00\x00\x00\x00\x000@\x00\x00\x00\x00\x00\x80X@\x00\x00\x00\x00\x00\x80W@\x00\x00\x00\x00\x00\x00W@\x00\x00\x00\x00\x00\x00S@\x00\x00\x00\x00\x00\x00J@\x00\x00\x00\x00\x00\x00A@\x00\x00\x00\x00\x00\x004@\x00\x00\x00\x00\x00\x000@\x00\x00\x00\x00\x00\x002@\x00\x00\x00\x00\x00\x000@\x01\x00\x00\x00\x00\x00,@\x00\x00\x00\x00\x00\x002@\x00\x00\x00\x00\x00\x80X@\x00\x00\x00\x00\x00\x80W@\x00\x00\x00\x00\x00\x80U@\x00\x00\x00\x00\x00\x00Q@\x00\x00\x00\x00\x00\x00I@\x00\x00\x00\x00\x00\x00D@\x00\x00\x00\x00\x00\x004@\x00\x00\x00\x00\x00\x00\x18@\x00\x00\x00\x00\x00\x00\x10@\x00\x00\x00\x00\x00\x00\x00\x00\x00\x00\x00\x00\x00\x00\x00\x00\x00\x00\x00\x00\x00\x00\x00\x00\x00\x00\x00\x00\x00\x80X@\x00\x00\x00\x00\x00\x80W@\x00\x00\x00\x00\x00\x00U@\x00\x00\x00\x00\x00\x00O@\x00\x00\x00\x00\x00\x00C@\x01\x00\x00\x00\x00\x00,@\x00\x00\x00\x00\x00\x00 @\x00\x00\x00\x00\x00\x00\x18@\x00\x00\x00\x00\x00\x00 @\x00\x00\x00\x00\x00\x00 @\x00\x00\x00\x00\x00\x00(@\x00\x00\x00\x00\x00\x00(@\x00\x00\x00\x00\x00\x80X@\x00\x00\x00\x00\x00\x80W@\x00\x00\x00\x00\x00\x80T@\x00\x00\x00\x00\x00\x80P@\x00\x00\x00\x00\x00\x00E@\x00\x00\x00\x00\x00\x00:@\x01\x00\x00\x00\x00\x00,@\x00\x00\x00\x00\x00\x00\x18@\x00\x00\x00\x00\x00\x00\x18@\x00\x00\x00\x00\x00\x00\x10@\x00\x00\x00\x00\x00\x00\x00\x00\x00\x00\x00\x00\x00\x00\x00\x00\x00\x00\x00\x00\x00\x80X@\x00\x00\x00\x00\x00\x80W@\x00\x00\x00\x00\x00\x00V@\x00\x00\x00\x00\x00\x80S@\x00\x00\x00\x00\x00\x80Q@\x00\x00\x00\x00\x00\x00N@\x00\x00\x00\x00\x00\x00K@\x00\x00\x00\x00\x00\x00C@\x01\x00\x00\x00\x00\x00<@\x00\x00\x00\x00\x00\x008@\x00\x00\x00\x00\x00\x008@\x00\x00\x00\x00\x00\x002@\x00\x00\x00\x00\x00\x00Y@\x00\x00\x00\x00\x00\x00Y@\x00\x00\x00\x00\x00\x80X@\x00\x00\x00\x00\x00\x80X@\x00\x00\x00\x00\x00\x80W@\x00\x00\x00\x00\x00\x80W@\x00\x00\x00\x00\x00\x80W@\x00\x00\x00\x00\x00\x80W@\x00\x00\x00\x00\x00\x80W@\x00\x00\x00\x00\x00\x00X@\x00\x00\x00\x00\x00\x00X@\x00\x00\x00\x00\x00\x00X@\x00\x00\x00\x00\x00\x00Y@\x00\x00\x00\x00\x00\x00Y@\x00\x00\x00\x00\x00\x00X@\x00\x00\x00\x00\x00\x80W@\x00\x00\x00\x00\x00\x00W@\x00\x00\x00\x00\x00\x80U@\x00\x00\x00\x00\x00\x80T@\x00\x00\x00\x00\x00\x80T@\x00\x00\x00\x00\x00\x80T@\x00\x00\x00\x00\x00\x80T@\x00\x00\x00\x00\x00\x80U@\x00\x00\x00\x00\x00\x00U@\x00\x00\x00\x00\x00\x00Y@\x00\x00\x00\x00\x00\x00Y@\x00\x00\x00\x00\x00\x80X@\x00\x00\x00\x00\x00\x80X@\x00\x00\x00\x00\x00\x80X@\x00\x00\x00\x00\x00\x80X@\x00\x00\x00\x00\x00\x80X@\x00\x00\x00\x00\x00\x00Y@\x00\x00\x00\x00\x00\x00Y@\x00\x00\x00\x00\x00\x00Y@\x00\x00\x00\x00\x00\x00Y@\x00\x00\x00\x00\x00\x00Y@\x00\x00\x00\x00\x00\x00Y@\x00\x00\x00\x00\x00\x00X@\x00\x00\x00\x00\x00\x00V@\x00\x00\x00\x00\x00\x00R@\x01\x00\x00\x00\x00\x00L@\x00\x00\x00\x00\x00\x00B@\x00\x00\x00\x00\x00\x00C@\x00\x00\x00\x00\x00\x00H@\x01\x00\x00\x00\x00\x00L@\x00\x00\x00\x00\x00\x00Q@\x00\x00\x00\x00\x00\x80R@\x00\x00\x00\x00\x00\x00T@\x00\x00\x00\x00\x00\x00Y@\x00\x00\x00\x00\x00\x80X@\x00\x00\x00\x00\x00\x00V@\x00\x00\x00\x00\x00\x80S@\x00\x00\x00\x00\x00\x00S@\x00\x00\x00\x00\x00\x00Q@\x01\x00\x00\x00\x00\x00L@\x00\x00\x00\x00\x00\x00K@\x00\x00\x00\x00\x00\x00J@\x01\x00\x00\x00\x00\x00L@\xff\xff\xff\xff\xff\xffL@\x00\x00\x00\x00\x00\x00O@\x00\x00\x00\x00\x00\x00Y@\x00\x00\x00\x00\x00\x80X@\x00\x00\x00\x00\x00\x00V@\x00\x00\x00\x00\x00\x80S@\x00\x00\x00\x00\x00\x00R@\x00\x00\x00\x00\x00\x00P@\xff\xff\xff\xff\xff\xffL@\xff\xff\xff\xff\xff\xffL@\x00\x00\x00\x00\x00\x00N@\xff\xff\xff\xff\xff\xffL@\x00\x00\x00\x00\x00\x00Q@\x00\x00\x00\x00\x00\x00Q@\x00\x00\x00\x00\x00\x00Y@\x00\x00\x00\x00\x00\x00X@\x00\x00\x00\x00\x00\x80W@\x00\x00\x00\x00\x00\x00V@\x00\x00\x00\x00\x00\x80T@\x00\x00\x00\x00\x00\x80S@\x00\x00\x00\x00\x00\x80P@\x00\x00\x00\x00\x00\x00O@\x00\x00\x00\x00\x00\x00O@\x00\x00\x00\x00\x00\x00N@\xff\xff\xff\xff\xff\xffL@\x01\x00\x00\x00\x00\x00L@\x00\x00\x00\x00\x00\x00Y@\x00\x00\x00\x00\x00\x00Y@\x00\x00\x00\x00\x00\x80X@\x00\x00\x00\x00\x00\x00X@\x00\x00\x00\x00\x00\x00V@\x00\x00\x00\x00\x00\x00R@\x00\x00\x00\x00\x00\x80P@\x00\x00\x00\x00\x00\x00J@\x00\x00\x00\x00\x00\x00I@\x00\x00\x00\x00\x00\x00F@\x00\x00\x00\x00\x00\x00E@\x00\x00\x00\x00\x00\x00E@\x00\x00\x00\x00\x00\x00Y@\x00\x00\x00\x00\x00\x80X@\x00\x00\x00\x00\x00\x80V@\x00\x00\x00\x00\x00\x00T@\x00\x00\x00\x00\x00\x80P@\x00\x00\x00\x00\x00\x00F@\x00\x00\x00\x00\x00\x00B@\x00\x00\x00\x00\x00\x00@@\x00\x00\x00\x00\x00\x00>@\x00\x00\x00\x00\x00\x00:@\x00\x00\x00\x00\x00\x00:@\x00\x00\x00\x00\x00\x00:@\x00\x00\x00\x00\x00\x00Y@\x00\x00\x00\x00\x00\x00X@\x00\x00\x00\x00\x00\x00U@\x00\x00\x00\x00\x00\x00R@\x00\x00\x00\x00\x00\x00J@\x01\x00\x00\x00\x00\x00<@\x00\x00\x00\x00\x00\x00(@\x00\x00\x00\x00\x00\x00(@\x00\x00\x00\x00\x00\x00 @\x00\x00\x00\x00\x00\x00\x00@\x00\x00\x00\x00\x00\x00\x00@\x00\x00\x00\x00\x00\x00\x00@\x00\x00\x00\x00\x00\x00Y@\x00\x00\x00\x00\x00\x00W@\x00\x00\x00\x00\x00\x80R@\x00\x00\x00\x00\x00\x00K@\x00\x00\x00\x00\x00\x004@\x00\x00\x00\x00\x00\x00$@\x00\x00\x00\x00\x00\x00\x18@\x00\x00\x00\x00\x00\x00\x10@\x00\x00\x00\x00\x00\x00\x00@\x00\x00\x00\x00\x00\x00\x00\x00\x00\x00\x00\x00\x00\x00\x00\x00\x00\x00\x00\x00\x00\x00\x00\x00\x00\x00\x00\x00\x00\x00Y@\x00\x00\x00\x00\x00\x00W@\x00\x00\x00\x00\x00\x00R@\xff\xff\xff\xff\xff\xffL@\x00\x00\x00\x00\x00\x00:@\x00\x00\x00\x00\x00\x00 @\x00\x00\x00\x00\x00\x00\x10@\x00\x00\x00\x00\x00\x00\x00@\x00\x00\x00\x00\x00\x00\x00@\x00\x00\x00\x00\x00\x00\x00@\x00\x00\x00\x00\x00\x00\x00\x00\x00\x00\x00\x00\x00\x00\x00\x00\x00\x00\x00\x00\x00\x00Y@\x00\x00\x00\x00\x00\x00X@\x00\x00\x00\x00\x00\x00V@\x00\x00\x00\x00\x00\x80R@\x00\x00\x00\x00\x00\x80P@\x00\x00\x00\x00\x00\x00O@\x00\x00\x00\x00\x00\x00D@\x01\x00\x00\x00\x00\x00<@\x00\x00\x00\x00\x00\x008@\x00\x00\x00\x00\x00\x004@\x00\x00\x00\x00\x00\x000@\x00\x00\x00\x00\x00\x00(@\x00\x00\x00\x00\x00\x00X@\x00\x00\x00\x00\x00\x00X@\x00\x00\x00\x00\x00\x80V@\x00\x00\x00\x00\x00\x00V@\x00\x00\x00\x00\x00\x80U@\x00\x00\x00\x00\x00\x80U@\x00\x00\x00\x00\x00\x80U@\x00\x00\x00\x00\x00\x80U@\x00\x00\x00\x00\x00\x00V@\x00\x00\x00\x00\x00\x00V@\x00\x00\x00\x00\x00\x00V@\x00\x00\x00\x00\x00\x00W@\x00\x00\x00\x00\x00\x00X@\x00\x00\x00\x00\x00\x80V@\x00\x00\x00\x00\x00\x80U@\x00\x00\x00\x00\x00\x80T@\x00\x00\x00\x00\x00\x80T@\x00\x00\x00\x00\x00\x80V@\x00\x00\x00\x00\x00\x80W@\x00\x00\x00\x00\x00\x80X@\x00\x00\x00\x00\x00\x80X@\x00\x00\x00\x00\x00\x80X@\x00\x00\x00\x00\x00\x00Y@\x00\x00\x00\x00\x00\x00Y@\x00\x00\x00\x00\x00\x00X@\x00\x00\x00\x00\x00\x00X@\x00\x00\x00\x00\x00\x00V@\x00\x00\x00\x00\x00\x80X@\x00\x00\x00\x00\x00\x00Y@\x00\x00\x00\x00\x00\x00Y@\x00\x00\x00\x00\x00\x00Y@\x00\x00\x00\x00\x00\x00Y@\x00\x00\x00\x00\x00\x00Y@\x00\x00\x00\x00\x00\x00Y@\x00\x00\x00\x00\x00\x00Y@\x00\x00\x00\x00\x00\x00Y@\x00\x00\x00\x00\x00\x00X@\x00\x00\x00\x00\x00\x00W@\x00\x00\x00\x00\x00\x80V@\x00\x00\x00\x00\x00\x00X@\x00\x00\x00\x00\x00\x80X@\x00\x00\x00\x00\x00\x00Y@\x00\x00\x00\x00\x00\x00Y@\x00\x00\x00\x00\x00\x00Y@\x00\x00\x00\x00\x00\x00Y@\x00\x00\x00\x00\x00\x00Y@\x00\x00\x00\x00\x00\x00Y@\x00\x00\x00\x00\x00\x00Y@\x00\x00\x00\x00\x00\x00X@\x00\x00\x00\x00\x00\x00X@\x00\x00\x00\x00\x00\x00W@\x00\x00\x00\x00\x00\x00Y@\x00\x00\x00\x00\x00\x00Y@\x00\x00\x00\x00\x00\x00Y@\x00\x00\x00\x00\x00\x00Y@\x00\x00\x00\x00\x00\x00Y@\x00\x00\x00\x00\x00\x00Y@\x00\x00\x00\x00\x00\x00Y@\x00\x00\x00\x00\x00\x00Y@\x00\x00\x00\x00\x00\x00Y@\x00\x00\x00\x00\x00\x00X@\x00\x00\x00\x00\x00\x00X@\x00\x00\x00\x00\x00\x00W@\x00\x00\x00\x00\x00\x00W@\x00\x00\x00\x00\x00\x80X@\x00\x00\x00\x00\x00\x00Y@\x00\x00\x00\x00\x00\x00Y@\x00\x00\x00\x00\x00\x00Y@\x00\x00\x00\x00\x00\x00Y@\x00\x00\x00\x00\x00\x00Y@\x00\x00\x00\x00\x00\x00Y@\x00\x00\x00\x00\x00\x00Y@\x00\x00\x00\x00\x00\x00X@\x00\x00\x00\x00\x00\x80X@\x00\x00\x00\x00\x00\x00Y@\x00\x00\x00\x00\x00\x00Y@\x00\x00\x00\x00\x00\x80X@\x00\x00\x00\x00\x00\x80X@\x00\x00\x00\x00\x00\x00Y@\x00\x00\x00\x00\x00\x00Y@\x00\x00\x00\x00\x00\x00Y@\x00\x00\x00\x00\x00\x00Y@\x00\x00\x00\x00\x00\x00Y@\x00\x00\x00\x00\x00\x00Y@\x00\x00\x00\x00\x00\x00X@\x00\x00\x00\x00\x00\x80X@\x00\x00\x00\x00\x00\x80X@\x00\x00\x00\x00\x00\x00Y@\x00\x00\x00\x00\x00\x00Y@\x00\x00\x00\x00\x00\x00Y@\x00\x00\x00\x00\x00\x00Y@\x00\x00\x00\x00\x00\x00Y@\x00\x00\x00\x00\x00\x00Y@\x00\x00\x00\x00\x00\x00Y@\x00\x00\x00\x00\x00\x00Y@\x00\x00\x00\x00\x00\x00Y@\x00\x00\x00\x00\x00\x00X@\x00\x00\x00\x00\x00\x00X@\x00\x00\x00\x00\x00\x80W@\x00\x00\x00\x00\x00\x00V@\x00\x00\x00\x00\x00\x80U@\x00\x00\x00\x00\x00\x00U@\x00\x00\x00\x00\x00\x00U@\x00\x00\x00\x00\x00\x80U@\x00\x00\x00\x00\x00\x00W@\x00\x00\x00\x00\x00\x00W@\x00\x00\x00\x00\x00\x80W@\x00\x00\x00\x00\x00\x00X@\x00\x00\x00\x00\x00\x00X@\x00\x00\x00\x00\x00\x00X@\x00\x00\x00\x00\x00\x80W@\x00\x00\x00\x00\x00\x00W@\x00\x00\x00\x00\x00\x80V@\x00\x00\x00\x00\x00\x00U@\x00\x00\x00\x00\x00\x00T@\x00\x00\x00\x00\x00\x00S@\x00\x00\x00\x00\x00\x00R@\x00\x00\x00\x00\x00\x00Q@\x00\x00\x00\x00\x00\x00Q@\x00\x00\x00\x00\x00\x80P@\x00\x00\x00\x00\x00\x00X@\x00\x00\x00\x00\x00\x00W@\x00\x00\x00\x00\x00\x80R@\x00\x00\x00\x00\x00\x80P@\x00\x00\x00\x00\x00\x00N@\x00\x00\x00\x00\x00\x00I@\x00\x00\x00\x00\x00\x00E@\x00\x00\x00\x00\x00\x00C@\x00\x00\x00\x00\x00\x00A@\x00\x00\x00\x00\x00\x008@\x00\x00\x00\x00\x00\x004@\x00\x00\x00\x00\x00\x002@\x00\x00\x00\x00\x00\x00X@\x00\x00\x00\x00\x00\x80W@\x00\x00\x00\x00\x00\x00T@\x00\x00\x00\x00\x00\x00Q@\x00\x00\x00\x00\x00\x00O@\x00\x00\x00\x00\x00\x00I@\x00\x00\x00\x00\x00\x00G@\x00\x00\x00\x00\x00\x00G@\x00\x00\x00\x00\x00\x00D@\x00\x00\x00\x00\x00\x00A@\x00\x00\x00\x00\x00\x00@@\x00\x00\x00\x00\x00\x00>@\x00\x00\x00\x00\x00\x00X@\x00\x00\x00\x00\x00\x80W@\x00\x00\x00\x00\x00\x00T@\x00\x00\x00\x00\x00\x00Q@\x00\x00\x00\x00\x00\x00O@\x01\x00\x00\x00\x00\x00L@\x00\x00\x00\x00\x00\x00E@\x00\x00\x00\x00\x00\x00B@\x00\x00\x00\x00\x00\x00A@\x00\x00\x00\x00\x00\x00@@\x00\x00\x00\x00\x00\x006@\x00\x00\x00\x00\x00\x000@\x00\x00\x00\x00\x00\x00Y@\x00\x00\x00\x00\x00\x00Y@\x00\x00\x00\x00\x00\x00Y@\x00\x00\x00\x00\x00\x00Y@\x00\x00\x00\x00\x00\x00Y@\x00\x00\x00\x00\x00\x00Y@\x00\x00\x00\x00\x00\x00Y@\x00\x00\x00\x00\x00\x00Y@\x00\x00\x00\x00\x00\x00Y@\x00\x00\x00\x00\x00\x00Y@\x00\x00\x00\x00\x00\x00Y@\x00\x00\x00\x00\x00\x00Y@\x00\x00\x00\x00\x00\x00Y@\x00\x00\x00\x00\x00\x00Y@\x00\x00\x00\x00\x00\x00Y@\x00\x00\x00\x00\x00\x00Y@\x00\x00\x00\x00\x00\x00Y@\x00\x00\x00\x00\x00\x00Y@\x00\x00\x00\x00\x00\x00Y@\x00\x00\x00\x00\x00\x00Y@\x00\x00\x00\x00\x00\x00Y@\x00\x00\x00\x00\x00\x00Y@\x00\x00\x00\x00\x00\x00Y@\x00\x00\x00\x00\x00\x00Y@\x00\x00\x00\x00\x00\x00Y@\x00\x00\x00\x00\x00\x80X@\x00\x00\x00\x00\x00\x00Y@\x00\x00\x00\x00\x00\x00Y@\x00\x00\x00\x00\x00\x00Y@\x00\x00\x00\x00\x00\x00Y@\x00\x00\x00\x00\x00\x00Y@\x00\x00\x00\x00\x00\x00Y@\x00\x00\x00\x00\x00\x00Y@\x00\x00\x00\x00\x00\x00Y@\x00\x00\x00\x00\x00\x00Y@\x00\x00\x00\x00\x00\x00Y@\x00\x00\x00\x00\x00\x00Y@\x00\x00\x00\x00\x00\x00Y@\x00\x00\x00\x00\x00\x00Y@\x00\x00\x00\x00\x00\x00Y@\x00\x00\x00\x00\x00\x00Y@\x00\x00\x00\x00\x00\x00Y@\x00\x00\x00\x00\x00\x00Y@\x00\x00\x00\x00\x00\x00Y@\x00\x00\x00\x00\x00\x00Y@\x00\x00\x00\x00\x00\x00Y@\x00\x00\x00\x00\x00\x00Y@\x00\x00\x00\x00\x00\x00Y@\x00\x00\x00\x00\x00\x00Y@\x00\x00\x00\x00\x00\x00Y@\x00\x00\x00\x00\x00\x00Y@\x00\x00\x00\x00\x00\x00Y@\x00\x00\x00\x00\x00\x00Y@\x00\x00\x00\x00\x00\x00Y@\x00\x00\x00\x00\x00\x00Y@\x00\x00\x00\x00\x00\x00Y@\x00\x00\x00\x00\x00\x00Y@\x00\x00\x00\x00\x00\x00Y@\x00\x00\x00\x00\x00\x00Y@\x00\x00\x00\x00\x00\x00Y@\x00\x00\x00\x00\x00\x00Y@\x00\x00\x00\x00\x00\x00Y@\x00\x00\x00\x00\x00\x00Y@\x00\x00\x00\x00\x00\x00Y@\x00\x00\x00\x00\x00\x00Y@\x00\x00\x00\x00\x00\x00Y@\x00\x00\x00\x00\x00\x00Y@\x00\x00\x00\x00\x00\x00Y@\x00\x00\x00\x00\x00\x00Y@\x00\x00\x00\x00\x00\x00Y@\x00\x00\x00\x00\x00\x00Y@\x00\x00\x00\x00\x00\x00Y@\x00\x00\x00\x00\x00\x00Y@\x00\x00\x00\x00\x00\x00Y@\x00\x00\x00\x00\x00\x00Y@\x00\x00\x00\x00\x00\x00Y@\x00\x00\x00\x00\x00\x00Y@\x00\x00\x00\x00\x00\x00Y@\x00\x00\x00\x00\x00\x00Y@\x00\x00\x00\x00\x00\x00Y@\x00\x00\x00\x00\x00\x00Y@\x00\x00\x00\x00\x00\x00Y@\x00\x00\x00\x00\x00\x00X@\x00\x00\x00\x00\x00\x80W@\x00\x00\x00\x00\x00\x00Y@\x00\x00\x00\x00\x00\x00Y@\x00\x00\x00\x00\x00\x00Y@\x00\x00\x00\x00\x00\x00Y@\x00\x00\x00\x00\x00\x00Y@\x00\x00\x00\x00\x00\x00Y@\x00\x00\x00\x00\x00\x00Y@\x00\x00\x00\x00\x00\x00X@\x00\x00\x00\x00\x00\x00X@\x00\x00\x00\x00\x00\x00X@\x00\x00\x00\x00\x00\x00X@\x00\x00\x00\x00\x00\x00X@\x00\x00\x00\x00\x00\x00Y@\x00\x00\x00\x00\x00\x00Y@\x00\x00\x00\x00\x00\x80X@\x00\x00\x00\x00\x00\x80X@\x00\x00\x00\x00\x00\x00Y@\x00\x00\x00\x00\x00\x00Y@\x00\x00\x00\x00\x00\x00Y@\x00\x00\x00\x00\x00\x80X@\x00\x00\x00\x00\x00\x80X@\x00\x00\x00\x00\x00\x80X@\x00\x00\x00\x00\x00\x00Y@\x00\x00\x00\x00\x00\x00Y@\x00\x00\x00\x00\x00\x00Y@\x00\x00\x00\x00\x00\x80X@\x00\x00\x00\x00\x00\x80X@\x00\x00\x00\x00\x00\x00X@\x00\x00\x00\x00\x00\x80W@\x00\x00\x00\x00\x00\x80U@\x00\x00\x00\x00\x00\x00T@\x00\x00\x00\x00\x00\x80R@\x00\x00\x00\x00\x00\x80Q@\x00\x00\x00\x00\x00\x80Q@\x00\x00\x00\x00\x00\x00Q@\x00\x00\x00\x00\x00\x00O@\x00\x00\x00\x00\x00\x00Y@\x00\x00\x00\x00\x00\x80X@\x00\x00\x00\x00\x00\x00V@\x00\x00\x00\x00\x00\x80Q@\x00\x00\x00\x00\x00\x00P@\x00\x00\x00\x00\x00\x00K@\x00\x00\x00\x00\x00\x00D@\x00\x00\x00\x00\x00\x00>@\x00\x00\x00\x00\x00\x004@\x00\x00\x00\x00\x00\x000@\x01\x00\x00\x00\x00\x00,@\x00\x00\x00\x00\x00\x00$@\x00\x00\x00\x00\x00\x00Y@\x00\x00\x00\x00\x00\x80X@\x00\x00\x00\x00\x00\x00U@\x00\x00\x00\x00\x00\x00S@\x00\x00\x00\x00\x00\x00N@\x00\x00\x00\x00\x00\x00D@\x00\x00\x00\x00\x00\x00@@\x00\x00\x00\x00\x00\x004@\x00\x00\x00\x00\x00\x002@\x00\x00\x00\x00\x00\x00$@\x00\x00\x00\x00\x00\x00 @\x00\x00\x00\x00\x00\x00 @\x00\x00\x00\x00\x00\x00Y@\x00\x00\x00\x00\x00\x80X@\x00\x00\x00\x00\x00\x80U@\x00\x00\x00\x00\x00\x00R@\x01\x00\x00\x00\x00\x00L@\x00\x00\x00\x00\x00\x00G@\x00\x00\x00\x00\x00\x008@\x00\x00\x00\x00\x00\x00$@\x00\x00\x00\x00\x00\x00 @\x00\x00\x00\x00\x00\x00\x10@\x00\x00\x00\x00\x00\x00\x00\x00\x00\x00\x00\x00\x00\x00\x00\x00\x00\x00\x00\x00\x00\x80P@\x00\x00\x00\x00\x00\x80P@\x00\x00\x00\x00\x00\x00R@\x00\x00\x00\x00\x00\x80S@\x00\x00\x00\x00\x00\x00T@\x00\x00\x00\x00\x00\x00T@\x00\x00\x00\x00\x00\x00S@\x00\x00\x00\x00\x00\x00S@\x00\x00\x00\x00\x00\x80S@\x00\x00\x00\x00\x00\x80S@\x00\x00\x00\x00\x00\x80S@\x00\x00\x00\x00\x00\x80S@\x00\x00\x00\x00\x00\x80P@\x00\x00\x00\x00\x00\x80P@\x00\x00\x00\x00\x00\x80Q@\x00\x00\x00\x00\x00\x80R@\x00\x00\x00\x00\x00\x00T@\x00\x00\x00\x00\x00\x80S@\x00\x00\x00\x00\x00\x80S@\x00\x00\x00\x00\x00\x00S@\x00\x00\x00\x00\x00\x80R@\x00\x00\x00\x00\x00\x80R@\x00\x00\x00\x00\x00\x80R@\x00\x00\x00\x00\x00\x80R@\x00\x00\x00\x00\x00\x80P@\x00\x00\x00\x00\x00\x00P@\x00\x00\x00\x00\x00\x00P@\x00\x00\x00\x00\x00\x00U@\x00\x00\x00\x00\x00\x80U@\x00\x00\x00\x00\x00\x00U@\x00\x00\x00\x00\x00\x00T@\x00\x00\x00\x00\x00\x00U@\x00\x00\x00\x00\x00\x00U@\x00\x00\x00\x00\x00\x00T@\x00\x00\x00\x00\x00\x00T@\x00\x00\x00\x00\x00\x00T@\x00\x00\x00\x00\x00\x80P@\x00\x00\x00\x00\x00\x00N@\x01\x00\x00\x00\x00\x00L@\x00\x00\x00\x00\x00\x00J@\x00\x00\x00\x00\x00\x00H@\x00\x00\x00\x00\x00\x00:@\x00\x00\x00\x00\x00\x00(@\x00\x00\x00\x00\x00\x00$@\x00\x00\x00\x00\x00\x00\x18@\x00\x00\x00\x00\x00\x00\x18@\x00\x00\x00\x00\x00\x00\x10@\x00\x00\x00\x00\x00\x00\x00@\x00\x00\x00\x00\x00\x80P@\x01\x00\x00\x00\x00\x00L@\x01\x00\x00\x00\x00\x00L@\x00\x00\x00\x00\x00\x00K@\x00\x00\x00\x00\x00\x00I@\x00\x00\x00\x00\x00\x00G@\x00\x00\x00\x00\x00\x00D@\x00\x00\x00\x00\x00\x00A@\x00\x00\x00\x00\x00\x004@\x00\x00\x00\x00\x00\x002@\x00\x00\x00\x00\x00\x000@\x01\x00\x00\x00\x00\x00,@\x00\x00\x00\x00\x00\x80P@\x00\x00\x00\x00\x00\x00O@\x01\x00\x00\x00\x00\x00L@\x00\x00\x00\x00\x00\x00J@\x00\x00\x00\x00\x00\x00G@\x00\x00\x00\x00\x00\x00C@\x00\x00\x00\x00\x00\x00B@\x00\x00\x00\x00\x00\x00A@\x00\x00\x00\x00\x00\x00A@\x00\x00\x00\x00\x00\x00B@\x00\x00\x00\x00\x00\x00@@\x01\x00\x00\x00\x00\x00<@\x00\x00\x00\x00\x00\x80P@\x00\x00\x00\x00\x00\x00P@\xff\xff\xff\xff\xff\xffL@\x00\x00\x00\x00\x00\x00J@\x00\x00\x00\x00\x00\x00G@\x00\x00\x00\x00\x00\x00F@\x00\x00\x00\x00\x00\x00G@\x00\x00\x00\x00\x00\x00J@\x00\x00\x00\x00\x00\x00K@\x00\x00\x00\x00\x00\x00I@\x00\x00\x00\x00\x00\x00H@\x00\x00\x00\x00\x00\x00G@\x00\x00\x00\x00\x00\x80P@\xff\xff\xff\xff\xff\xffL@\x00\x00\x00\x00\x00\x00I@\x00\x00\x00\x00\x00\x00E@\x00\x00\x00\x00\x00\x00A@\x00\x00\x00\x00\x00\x00:@\x00\x00\x00\x00\x00\x00(@\x00\x00\x00\x00\x00\x00$@\x01\x00\x00\x00\x00\x00,@\x00\x00\x00\x00\x00\x000@\x00\x00\x00\x00\x00\x006@\x00\x00\x00\x00\x00\x006@\x00\x00\x00\x00\x00\x80P@\x00\x00\x00\x00\x00\x00N@\x00\x00\x00\x00\x00\x00H@\x00\x00\x00\x00\x00\x00D@\x00\x00\x00\x00\x00\x00A@\x00\x00\x00\x00\x00\x008@\x00\x00\x00\x00\x00\x006@\x01\x00\x00\x00\x00\x00,@\x00\x00\x00\x00\x00\x00$@\x00\x00\x00\x00\x00\x00 @\x00\x00\x00\x00\x00\x00 @\x00\x00\x00\x00\x00\x00 @\x00\x00\x00\x00\x00\x80P@\x01\x00\x00\x00\x00\x00L@\x00\x00\x00\x00\x00\x00F@\x00\x00\x00\x00\x00\x00@@\x00\x00\x00\x00\x00\x008@\x00\x00\x00\x00\x00\x002@\x01\x00\x00\x00\x00\x00,@\x00\x00\x00\x00\x00\x00$@\x00\x00\x00\x00\x00\x00$@\x00\x00\x00\x00\x00\x00$@\x00\x00\x00\x00\x00\x00$@\x00\x00\x00\x00\x00\x00$@\x00\x00\x00\x00\x00\x80P@\x00\x00\x00\x00\x00\x00N@\x00\x00\x00\x00\x00\x00E@\x00\x00\x00\x00\x00\x00@@\x01\x00\x00\x00\x00\x00<@\x00\x00\x00\x00\x00\x006@\x00\x00\x00\x00\x00\x004@\x00\x00\x00\x00\x00\x002@\x01\x00\x00\x00\x00\x00,@\x00\x00\x00\x00\x00\x00(@\x00\x00\x00\x00\x00\x00\x18@\x00\x00\x00\x00\x00\x00\x18@\x00\x00\x00\x00\x00\x80P@\x01\x00\x00\x00\x00\x00L@\x00\x00\x00\x00\x00\x00C@\x00\x00\x00\x00\x00\x00@@\x00\x00\x00\x00\x00\x00>@\x00\x00\x00\x00\x00\x008@\x00\x00\x00\x00\x00\x000@\x00\x00\x00\x00\x00\x00(@\x00\x00\x00\x00\x00\x00$@\x00\x00\x00\x00\x00\x00$@\x00\x00\x00\x00\x00\x00 @\x00\x00\x00\x00\x00\x00\x18@\x00\x00\x00\x00\x00\x80P@\xff\xff\xff\xff\xff\xffL@\x00\x00\x00\x00\x00\x00G@\x00\x00\x00\x00\x00\x00B@\x00\x00\x00\x00\x00\x00>@\x00\x00\x00\x00\x00\x000@\x00\x00\x00\x00\x00\x00 @\x00\x00\x00\x00\x00\x00\x10@\x00\x00\x00\x00\x00\x00\x10@\x00\x00\x00\x00\x00\x00\x10@\x00\x00\x00\x00\x00\x00\x00\x00\x00\x00\x00\x00\x00\x00\x00\x00'
p14
tp15
bag1
(g2
(I0
tp16
g4
tp17
Rp18
(I1
(I2
I8
I13
I12
tp19
g11
I00
S'\x00\x00\x00\x00\x00\x80V@\x00\x00\x00\x00\x00\x80V@\x00\x00\x00\x00\x00\x00V@\x00\x00\x00\x00\x00\x00V@\x00\x00\x00\x00\x00\x80T@\x00\x00\x00\x00\x00\x80T@\x00\x00\x00\x00\x00\x80S@\x00\x00\x00\x00\x00\x00S@\x00\x00\x00\x00\x00\x80R@\x00\x00\x00\x00\x00\x80R@\x00\x00\x00\x00\x00\x00R@\x00\x00\x00\x00\x00\x00Q@\x00\x00\x00\x00\x00\x80V@\x00\x00\x00\x00\x00\x80U@\x00\x00\x00\x00\x00\x00V@\x00\x00\x00\x00\x00\x80T@\x00\x00\x00\x00\x00\x80S@\x00\x00\x00\x00\x00\x00O@\x00\x00\x00\x00\x00\x00D@\x00\x00\x00\x00\x00\x002@\x00\x00\x00\x00\x00\x00\x10@\x00\x00\x00\x00\x00\x00\x10@\x00\x00\x00\x00\x00\x00\x00\x00\x00\x00\x00\x00\x00\x00\x00\x00\x00\x00\x00\x00\x00\x80V@\x00\x00\x00\x00\x00\x00V@\x00\x00\x00\x00\x00\x80U@\x00\x00\x00\x00\x00\x00U@\x00\x00\x00\x00\x00\x80S@\x01\x00\x00\x00\x00\x00L@\x00\x00\x00\x00\x00\x00E@\x00\x00\x00\x00\x00\x004@\x00\x00\x00\x00\x00\x00$@\x00\x00\x00\x00\x00\x00\x10@\x00\x00\x00\x00\x00\x00\x00\x00\x00\x00\x00\x00\x00\x00\x00\x00\x00\x00\x00\x00\x00\x80V@\x00\x00\x00\x00\x00\x00W@\x00\x00\x00\x00\x00\x00X@\x00\x00\x00\x00\x00\x00Y@\x00\x00\x00\x00\x00\x80X@\x00\x00\x00\x00\x00\x00U@\x00\x00\x00\x00\x00\x00A@\x00\x00\x00\x00\x00\x00\x18@\x00\x00\x00\x00\x00\x00\x00\x00\x00\x00\x00\x00\x00\x00\x00\x00\x00\x00\x00\x00\x00\x00\x00\x00\x00\x00\x00\x00\x00\x00\x00\x00\x00\x00\x00\x00\x00\x80V@\x00\x00\x00\x00\x00\x00W@\x00\x00\x00\x00\x00\x00W@\x00\x00\x00\x00\x00\x00W@\x00\x00\x00\x00\x00\x80V@\x00\x00\x00\x00\x00\x00U@\x00\x00\x00\x00\x00\x00B@\x00\x00\x00\x00\x00\x00(@\x00\x00\x00\x00\x00\x00\x10@\x00\x00\x00\x00\x00\x00\x00\x00\x00\x00\x00\x00\x00\x00\x00\x00\x00\x00\x00\x00\x00\x00\x00\x00\x00\x00\x00\x00\x00\x80V@\x00\x00\x00\x00\x00\x80V@\x00\x00\x00\x00\x00\x00W@\x00\x00\x00\x00\x00\x80W@\x00\x00\x00\x00\x00\x80W@\x00\x00\x00\x00\x00\x80W@\x00\x00\x00\x00\x00\x80W@\x00\x00\x00\x00\x00\x80W@\x00\x00\x00\x00\x00\x00W@\x00\x00\x00\x00\x00\x80T@\x00\x00\x00\x00\x00\x80Q@\x00\x00\x00\x00\x00\x00J@\x00\x00\x00\x00\x00\x80V@\x00\x00\x00\x00\x00\x80V@\x00\x00\x00\x00\x00\x80V@\x00\x00\x00\x00\x00\x80U@\x00\x00\x00\x00\x00\x00S@\x00\x00\x00\x00\x00\x00P@\x00\x00\x00\x00\x00\x00K@\x00\x00\x00\x00\x00\x00G@\x00\x00\x00\x00\x00\x00A@\x00\x00\x00\x00\x00\x00>@\x00\x00\x00\x00\x00\x00:@\x00\x00\x00\x00\x00\x004@\x00\x00\x00\x00\x00\x80V@\x00\x00\x00\x00\x00\x00W@\x00\x00\x00\x00\x00\x80W@\x00\x00\x00\x00\x00\x00X@\x00\x00\x00\x00\x00\x00X@\x00\x00\x00\x00\x00\x00X@\x00\x00\x00\x00\x00\x80W@\x00\x00\x00\x00\x00\x00V@\x00\x00\x00\x00\x00\x80U@\x00\x00\x00\x00\x00\x80T@\x00\x00\x00\x00\x00\x00T@\x00\x00\x00\x00\x00\x80S@\x00\x00\x00\x00\x00\x80V@\x00\x00\x00\x00\x00\x00W@\x00\x00\x00\x00\x00\x00W@\x00\x00\x00\x00\x00\x00X@\x00\x00\x00\x00\x00\x00X@\x00\x00\x00\x00\x00\x80V@\x00\x00\x00\x00\x00\x80T@\x00\x00\x00\x00\x00\x80T@\x00\x00\x00\x00\x00\x80S@\x00\x00\x00\x00\x00\x00Q@\x00\x00\x00\x00\x00\x80P@\x00\x00\x00\x00\x00\x00O@\x00\x00\x00\x00\x00\x80V@\x00\x00\x00\x00\x00\x80U@\x00\x00\x00\x00\x00\x80S@\x00\x00\x00\x00\x00\x00Q@\x00\x00\x00\x00\x00\x00I@\x00\x00\x00\x00\x00\x00B@\x00\x00\x00\x00\x00\x00:@\x00\x00\x00\x00\x00\x00$@\x00\x00\x00\x00\x00\x00\x00\x00\x00\x00\x00\x00\x00\x00\x00\x00\x00\x00\x00\x00\x00\x00\x00\x00\x00\x00\x00\x00\x00\x00\x00\x00\x00\x00\x00\x00\x00\x80V@\x00\x00\x00\x00\x00\x00T@\x01\x00\x00\x00\x00\x00L@\x00\x00\x00\x00\x00\x00C@\x00\x00\x00\x00\x00\x00(@\x00\x00\x00\x00\x00\x00\x00@\x00\x00\x00\x00\x00\x00\x00\x00\x00\x00\x00\x00\x00\x00\x00\x00\x00\x00\x00\x00\x00\x00\x00\x00\x00\x00\x00\x00\x00\x00\x00\x00\x00\x00\x00\x00\x00\x00\x00\x00\x00\x00\x00\x00\x00\x00\x00\x00\x00\x00\x00\x00\x00\x80V@\x00\x00\x00\x00\x00\x00R@\x00\x00\x00\x00\x00\x00H@\x00\x00\x00\x00\x00\x004@\x00\x00\x00\x00\x00\x00\x18@\x00\x00\x00\x00\x00\x00\x00@\x00\x00\x00\x00\x00\x00\x00\x00\x00\x00\x00\x00\x00\x00\x00\x00\x00\x00\x00\x00\x00\x00\x00\x00\x00\x00\x00\x00\x00\x00\x00\x00\x00\x00\x00\x00\x00\x00\x00\x00\x00\x00\x00\x00\x00\x00\x00\x00\x00\x00\x00\x00\x00\x80V@\x00\x00\x00\x00\x00\x00S@\xff\xff\xff\xff\xff\xffL@\x00\x00\x00\x00\x00\x00J@\x00\x00\x00\x00\x00\x008@\x00\x00\x00\x00\x00\x00 @\x00\x00\x00\x00\x00\x00\x10@\x00\x00\x00\x00\x00\x00\x00\x00\x00\x00\x00\x00\x00\x00\x00\x00\x00\x00\x00\x00\x00\x00\x00\x00\x00\x00\x00\x00\x00\x00\x00\x00\x00\x00\x00\x00\x00\x00\x00\x00\x00\x00\x00\x00\x00\x00\x00@\x00\x00\x00\x00\x00\x00\x00@\x00\x00\x00\x00\x00\x00\x00@\x00\x00\x00\x00\x00\x00\x00@\x00\x00\x00\x00\x00\x00\x00\x00\x00\x00\x00\x00\x00\x00\x00\x00\x00\x00\x00\x00\x00\x00\x00\x00\x00\x00\x00\x00\x00\x00\x00@\x00\x00\x00\x00\x00\x00\x00@\x00\x00\x00\x00\x00\x00\x00@\x00\x00\x00\x00\x00\x00\x00@\x00\x00\x00\x00\x00\x00\x00@\x00\x00\x00\x00\x00\x00\x00@\x00\x00\x00\x00\x00\x00\x00@\x00\x00\x00\x00\x00\x00\x10@\x01\x00\x00\x00\x00\x00,@\x00\x00\x00\x00\x00\x002@\x00\x00\x00\x00\x00\x00(@\x01\x00\x00\x00\x00\x00,@\x01\x00\x00\x00\x00\x00,@\x01\x00\x00\x00\x00\x00,@\x00\x00\x00\x00\x00\x00 @\x00\x00\x00\x00\x00\x00\x10@\x00\x00\x00\x00\x00\x00\x10@\x00\x00\x00\x00\x00\x00\x00@\x00\x00\x00\x00\x00\x00$@\x00\x00\x00\x00\x00\x000@\x00\x00\x00\x00\x00\x006@\x00\x00\x00\x00\x00\x008@\x00\x00\x00\x00\x00\x002@\x00\x00\x00\x00\x00\x00 @\x00\x00\x00\x00\x00\x00\x10@\x00\x00\x00\x00\x00\x00\x00@\x00\x00\x00\x00\x00\x00\x00@\x00\x00\x00\x00\x00\x00\x00\x00\x00\x00\x00\x00\x00\x00\x00\x00\x00\x00\x00\x00\x00\x00\x00@\x00\x00\x00\x00\x00\x000@\x00\x00\x00\x00\x00\x00D@\x00\x00\x00\x00\x00\x00G@\x01\x00\x00\x00\x00\x00L@\x00\x00\x00\x00\x00\x00N@\x00\x00\x00\x00\x00\x00N@\x00\x00\x00\x00\x00\x80Q@\x00\x00\x00\x00\x00\x00R@\x00\x00\x00\x00\x00\x00R@\x00\x00\x00\x00\x00\x00R@\x00\x00\x00\x00\x00\x00S@\x00\x00\x00\x00\x00\x00\x00@\x00\x00\x00\x00\x00\x00:@\x01\x00\x00\x00\x00\x00L@\x00\x00\x00\x00\x00\x80R@\x00\x00\x00\x00\x00\x00V@\x00\x00\x00\x00\x00\x00X@\x00\x00\x00\x00\x00\x80X@\x00\x00\x00\x00\x00\x00Y@\x00\x00\x00\x00\x00\x00Y@\x00\x00\x00\x00\x00\x00Y@\x00\x00\x00\x00\x00\x00Y@\x00\x00\x00\x00\x00\x00Y@\x00\x00\x00\x00\x00\x00\x00@\x01\x00\x00\x00\x00\x00<@\x01\x00\x00\x00\x00\x00L@\x00\x00\x00\x00\x00\x00R@\x00\x00\x00\x00\x00\x00S@\x00\x00\x00\x00\x00\x00V@\x00\x00\x00\x00\x00\x00X@\x00\x00\x00\x00\x00\x80X@\x00\x00\x00\x00\x00\x80X@\x00\x00\x00\x00\x00\x80X@\x00\x00\x00\x00\x00\x80X@\x00\x00\x00\x00\x00\x80X@\x00\x00\x00\x00\x00\x00\x00@\x00\x00\x00\x00\x00\x00:@\x00\x00\x00\x00\x00\x00J@\x00\x00\x00\x00\x00\x00Q@\x00\x00\x00\x00\x00\x80S@\x00\x00\x00\x00\x00\x00T@\x00\x00\x00\x00\x00\x00V@\x00\x00\x00\x00\x00\x00V@\x00\x00\x00\x00\x00\x00V@\x00\x00\x00\x00\x00\x80V@\x00\x00\x00\x00\x00\x80V@\x00\x00\x00\x00\x00\x00V@\x00\x00\x00\x00\x00\x00\x00@\x00\x00\x00\x00\x00\x00@@\x00\x00\x00\x00\x00\x00Q@\x00\x00\x00\x00\x00\x80R@\x00\x00\x00\x00\x00\x00U@\x00\x00\x00\x00\x00\x80U@\x00\x00\x00\x00\x00\x80V@\x00\x00\x00\x00\x00\x00X@\x00\x00\x00\x00\x00\x00X@\x00\x00\x00\x00\x00\x00Y@\x00\x00\x00\x00\x00\x00Y@\x00\x00\x00\x00\x00\x00Y@\x00\x00\x00\x00\x00\x00\x00@\x00\x00\x00\x00\x00\x00:@\x00\x00\x00\x00\x00\x00O@\x00\x00\x00\x00\x00\x00T@\x00\x00\x00\x00\x00\x00V@\x00\x00\x00\x00\x00\x80X@\x00\x00\x00\x00\x00\x00Y@\x00\x00\x00\x00\x00\x00Y@\x00\x00\x00\x00\x00\x00Y@\x00\x00\x00\x00\x00\x00Y@\x00\x00\x00\x00\x00\x00Y@\x00\x00\x00\x00\x00\x00Y@\x00\x00\x00\x00\x00\x00\x00@\x00\x00\x00\x00\x00\x00B@\x00\x00\x00\x00\x00\x80R@\x00\x00\x00\x00\x00\x80W@\x00\x00\x00\x00\x00\x00Y@\x00\x00\x00\x00\x00\x00Y@\x00\x00\x00\x00\x00\x00Y@\x00\x00\x00\x00\x00\x00Y@\x00\x00\x00\x00\x00\x00Y@\x00\x00\x00\x00\x00\x00Y@\x00\x00\x00\x00\x00\x00Y@\x00\x00\x00\x00\x00\x00Y@\x00\x00\x00\x00\x00\x00\x00@\x00\x00\x00\x00\x00\x00P@\x00\x00\x00\x00\x00\x00Y@\x00\x00\x00\x00\x00\x00Y@\x00\x00\x00\x00\x00\x00Y@\x00\x00\x00\x00\x00\x00Y@\x00\x00\x00\x00\x00\x00Y@\x00\x00\x00\x00\x00\x00Y@\x00\x00\x00\x00\x00\x00Y@\x00\x00\x00\x00\x00\x00Y@\x00\x00\x00\x00\x00\x00Y@\x00\x00\x00\x00\x00\x00Y@\x00\x00\x00\x00\x00\x00\x00@\x00\x00\x00\x00\x00\x00K@\x00\x00\x00\x00\x00\x80U@\x00\x00\x00\x00\x00\x00Y@\x00\x00\x00\x00\x00\x00Y@\x00\x00\x00\x00\x00\x00Y@\x00\x00\x00\x00\x00\x00Y@\x00\x00\x00\x00\x00\x00Y@\x00\x00\x00\x00\x00\x00Y@\x00\x00\x00\x00\x00\x00Y@\x00\x00\x00\x00\x00\x00Y@\x00\x00\x00\x00\x00\x00Y@\x00\x00\x00\x00\x00\x00\x00@\x00\x00\x00\x00\x00\x008@\x00\x00\x00\x00\x00\x00N@\x00\x00\x00\x00\x00\x80T@\x00\x00\x00\x00\x00\x80X@\x00\x00\x00\x00\x00\x00Y@\x00\x00\x00\x00\x00\x00Y@\x00\x00\x00\x00\x00\x00Y@\x00\x00\x00\x00\x00\x00Y@\x00\x00\x00\x00\x00\x00Y@\x00\x00\x00\x00\x00\x00Y@\x00\x00\x00\x00\x00\x00Y@\x00\x00\x00\x00\x00\x00 @\x00\x00\x00\x00\x00\x00\x18@\x00\x00\x00\x00\x00\x00\x00@\x00\x00\x00\x00\x00\x00\x00@\x00\x00\x00\x00\x00\x00\x00@\x00\x00\x00\x00\x00\x00\x00\x00\x00\x00\x00\x00\x00\x00\x00\x00\x00\x00\x00\x00\x00\x00\x00\x00\x00\x00\x00\x00\x00\x00\x00\x00\x00\x00\x00\x00\x00\x00\x00\x00\x00\x00\x00\x00\x00\x00\x00\x00\x00\x00\x00\x00\x00\x00\x00\x00\x00\x00\x00\x00\x00\x00 @\x01\x00\x00\x00\x00\x00,@\x00\x00\x00\x00\x00\x00$@\x00\x00\x00\x00\x00\x00 @\x00\x00\x00\x00\x00\x00\x00@\x00\x00\x00\x00\x00\x00\x00@\x00\x00\x00\x00\x00\x00\x00\x00\x00\x00\x00\x00\x00\x00\x00\x00\x00\x00\x00\x00\x00\x00\x00\x00\x00\x00\x00\x00\x00\x00\x00\x00\x00\x00\x00\x00\x00\x00\x00\x00\x00\x00\x00\x00\x00\x00\x00\x00\x00\x00\x00\x00\x00\x00 @\x01\x00\x00\x00\x00\x00,@\x00\x00\x00\x00\x00\x002@\x00\x00\x00\x00\x00\x000@\x00\x00\x00\x00\x00\x000@\x00\x00\x00\x00\x00\x00(@\x00\x00\x00\x00\x00\x00$@\x00\x00\x00\x00\x00\x00\x18@\x00\x00\x00\x00\x00\x00\x10@\x00\x00\x00\x00\x00\x00\x10@\x00\x00\x00\x00\x00\x00\x10@\x00\x00\x00\x00\x00\x00\x10@\x00\x00\x00\x00\x00\x00 @\x00\x00\x00\x00\x00\x00 @\x00\x00\x00\x00\x00\x00$@\x00\x00\x00\x00\x00\x00(@\x00\x00\x00\x00\x00\x00(@\x00\x00\x00\x00\x00\x00(@\x01\x00\x00\x00\x00\x00,@\x00\x00\x00\x00\x00\x002@\x00\x00\x00\x00\x00\x002@\x00\x00\x00\x00\x00\x004@\x00\x00\x00\x00\x00\x006@\x00\x00\x00\x00\x00\x00:@\x00\x00\x00\x00\x00\x00 @\x00\x00\x00\x00\x00\x002@\x00\x00\x00\x00\x00\x00>@\x00\x00\x00\x00\x00\x00B@\x00\x00\x00\x00\x00\x00:@\x00\x00\x00\x00\x00\x006@\x00\x00\x00\x00\x00\x00(@\x00\x00\x00\x00\x00\x00\x10@\x00\x00\x00\x00\x00\x00\x10@\x00\x00\x00\x00\x00\x00\x00@\x00\x00\x00\x00\x00\x00\x18@\x00\x00\x00\x00\x00\x00 @\x00\x00\x00\x00\x00\x00 @\x00\x00\x00\x00\x00\x004@\x00\x00\x00\x00\x00\x00B@\x00\x00\x00\x00\x00\x00I@\x01\x00\x00\x00\x00\x00L@\x00\x00\x00\x00\x00\x00N@\x00\x00\x00\x00\x00\x00N@\x01\x00\x00\x00\x00\x00L@\x00\x00\x00\x00\x00\x00K@\x00\x00\x00\x00\x00\x00I@\x00\x00\x00\x00\x00\x00G@\x00\x00\x00\x00\x00\x00A@\x00\x00\x00\x00\x00\x00 @\x00\x00\x00\x00\x00\x000@\x01\x00\x00\x00\x00\x00<@\x00\x00\x00\x00\x00\x00E@\x00\x00\x00\x00\x00\x00J@\xff\xff\xff\xff\xff\xffL@\x00\x00\x00\x00\x00\x80Q@\x00\x00\x00\x00\x00\x00U@\x00\x00\x00\x00\x00\x80U@\x00\x00\x00\x00\x00\x00U@\x00\x00\x00\x00\x00\x80U@\x00\x00\x00\x00\x00\x80U@\x00\x00\x00\x00\x00\x00 @\x00\x00\x00\x00\x00\x00:@\x00\x00\x00\x00\x00\x00K@\xff\xff\xff\xff\xff\xffL@\x00\x00\x00\x00\x00\x00N@\x00\x00\x00\x00\x00\x00K@\x00\x00\x00\x00\x00\x00F@\x00\x00\x00\x00\x00\x00A@\x00\x00\x00\x00\x00\x00>@\x00\x00\x00\x00\x00\x008@\x00\x00\x00\x00\x00\x006@\x00\x00\x00\x00\x00\x004@\x00\x00\x00\x00\x00\x00 @\x00\x00\x00\x00\x00\x00A@\x00\x00\x00\x00\x00\x00N@\x00\x00\x00\x00\x00\x00T@\x00\x00\x00\x00\x00\x80T@\x00\x00\x00\x00\x00\x00S@\x00\x00\x00\x00\x00\x00N@\x00\x00\x00\x00\x00\x00H@\x00\x00\x00\x00\x00\x00A@\x00\x00\x00\x00\x00\x00:@\x00\x00\x00\x00\x00\x004@\x00\x00\x00\x00\x00\x000@\x00\x00\x00\x00\x00\x00 @\x00\x00\x00\x00\x00\x004@\x00\x00\x00\x00\x00\x00E@\x00\x00\x00\x00\x00\x80R@\x00\x00\x00\x00\x00\x80V@\x00\x00\x00\x00\x00\x80W@\x00\x00\x00\x00\x00\x80X@\x00\x00\x00\x00\x00\x00Y@\x00\x00\x00\x00\x00\x00Y@\x00\x00\x00\x00\x00\x00Y@\x00\x00\x00\x00\x00\x00Y@\x00\x00\x00\x00\x00\x00Y@\x00\x00\x00\x00\x00\x00 @\x00\x00\x00\x00\x00\x00G@\x00\x00\x00\x00\x00\x00W@\x00\x00\x00\x00\x00\x00Y@\x00\x00\x00\x00\x00\x00Y@\x00\x00\x00\x00\x00\x00Y@\x00\x00\x00\x00\x00\x00Y@\x00\x00\x00\x00\x00\x00Y@\x00\x00\x00\x00\x00\x00Y@\x00\x00\x00\x00\x00\x00Y@\x00\x00\x00\x00\x00\x00Y@\x00\x00\x00\x00\x00\x00Y@\x00\x00\x00\x00\x00\x00 @\x00\x00\x00\x00\x00\x00G@\x00\x00\x00\x00\x00\x80U@\x00\x00\x00\x00\x00\x80X@\x00\x00\x00\x00\x00\x00Y@\x00\x00\x00\x00\x00\x00Y@\x00\x00\x00\x00\x00\x00Y@\x00\x00\x00\x00\x00\x00Y@\x00\x00\x00\x00\x00\x00Y@\x00\x00\x00\x00\x00\x00Y@\x00\x00\x00\x00\x00\x00Y@\x00\x00\x00\x00\x00\x00Y@\x00\x00\x00\x00\x00\x00 @\x00\x00\x00\x00\x00\x006@\x00\x00\x00\x00\x00\x00F@\x00\x00\x00\x00\x00\x80Q@\x00\x00\x00\x00\x00\x00U@\x00\x00\x00\x00\x00\x80W@\x00\x00\x00\x00\x00\x00Y@\x00\x00\x00\x00\x00\x00Y@\x00\x00\x00\x00\x00\x00Y@\x00\x00\x00\x00\x00\x00Y@\x00\x00\x00\x00\x00\x00Y@\x00\x00\x00\x00\x00\x00Y@\x00\x00\x00\x00\x00\x002@\x00\x00\x00\x00\x00\x006@\x00\x00\x00\x00\x00\x006@\x00\x00\x00\x00\x00\x00>@\x00\x00\x00\x00\x00\x00A@\x00\x00\x00\x00\x00\x00A@\x00\x00\x00\x00\x00\x00B@\x00\x00\x00\x00\x00\x00A@\x00\x00\x00\x00\x00\x00>@\x00\x00\x00\x00\x00\x00:@\x00\x00\x00\x00\x00\x004@\x00\x00\x00\x00\x00\x004@\x00\x00\x00\x00\x00\x002@\x00\x00\x00\x00\x00\x006@\x00\x00\x00\x00\x00\x004@\x00\x00\x00\x00\x00\x002@\x00\x00\x00\x00\x00\x000@\x00\x00\x00\x00\x00\x00$@\x00\x00\x00\x00\x00\x00\x18@\x00\x00\x00\x00\x00\x00\x18@\x00\x00\x00\x00\x00\x00\x10@\x00\x00\x00\x00\x00\x00\x10@\x00\x00\x00\x00\x00\x00\x00@\x00\x00\x00\x00\x00\x00\x10@\x00\x00\x00\x00\x00\x002@\x00\x00\x00\x00\x00\x006@\x00\x00\x00\x00\x00\x002@\x00\x00\x00\x00\x00\x004@\x00\x00\x00\x00\x00\x000@\x00\x00\x00\x00\x00\x00(@\x00\x00\x00\x00\x00\x00$@\x00\x00\x00\x00\x00\x00 @\x00\x00\x00\x00\x00\x00\x18@\x00\x00\x00\x00\x00\x00 @\x00\x00\x00\x00\x00\x00 @\x00\x00\x00\x00\x00\x00(@\x00\x00\x00\x00\x00\x002@\x00\x00\x00\x00\x00\x006@\x00\x00\x00\x00\x00\x00:@\x00\x00\x00\x00\x00\x008@\x01\x00\x00\x00\x00\x00<@\x00\x00\x00\x00\x00\x00>@\x00\x00\x00\x00\x00\x00A@\x00\x00\x00\x00\x00\x00F@\x00\x00\x00\x00\x00\x00J@\x01\x00\x00\x00\x00\x00L@\x01\x00\x00\x00\x00\x00L@\x00\x00\x00\x00\x00\x00N@\x00\x00\x00\x00\x00\x002@\x00\x00\x00\x00\x00\x008@\x00\x00\x00\x00\x00\x00A@\x00\x00\x00\x00\x00\x00H@\x00\x00\x00\x00\x00\x00P@\x00\x00\x00\x00\x00\x80R@\x00\x00\x00\x00\x00\x00T@\x00\x00\x00\x00\x00\x80T@\x00\x00\x00\x00\x00\x80W@\x00\x00\x00\x00\x00\x80W@\x00\x00\x00\x00\x00\x80X@\x00\x00\x00\x00\x00\x80X@\x00\x00\x00\x00\x00\x002@\x00\x00\x00\x00\x00\x00:@\x00\x00\x00\x00\x00\x00D@\x00\x00\x00\x00\x00\x00K@\x00\x00\x00\x00\x00\x00R@\x00\x00\x00\x00\x00\x80U@\x00\x00\x00\x00\x00\x00W@\x00\x00\x00\x00\x00\x00X@\x00\x00\x00\x00\x00\x00X@\x00\x00\x00\x00\x00\x80X@\x00\x00\x00\x00\x00\x80X@\x00\x00\x00\x00\x00\x00Y@\x00\x00\x00\x00\x00\x002@\x00\x00\x00\x00\x00\x00:@\x00\x00\x00\x00\x00\x00B@\x01\x00\x00\x00\x00\x00L@\x00\x00\x00\x00\x00\x80R@\x00\x00\x00\x00\x00\x80U@\x00\x00\x00\x00\x00\x80W@\x00\x00\x00\x00\x00\x80X@\x00\x00\x00\x00\x00\x80X@\x00\x00\x00\x00\x00\x00Y@\x00\x00\x00\x00\x00\x00Y@\x00\x00\x00\x00\x00\x00Y@\x00\x00\x00\x00\x00\x002@\x01\x00\x00\x00\x00\x00<@\x00\x00\x00\x00\x00\x00F@\x00\x00\x00\x00\x00\x00P@\x00\x00\x00\x00\x00\x80T@\x00\x00\x00\x00\x00\x00W@\x00\x00\x00\x00\x00\x80W@\x00\x00\x00\x00\x00\x00X@\x00\x00\x00\x00\x00\x80X@\x00\x00\x00\x00\x00\x00Y@\x00\x00\x00\x00\x00\x00Y@\x00\x00\x00\x00\x00\x00Y@\x00\x00\x00\x00\x00\x002@\x01\x00\x00\x00\x00\x00<@\x00\x00\x00\x00\x00\x00J@\x00\x00\x00\x00\x00\x80T@\x00\x00\x00\x00\x00\x80W@\x00\x00\x00\x00\x00\x80X@\x00\x00\x00\x00\x00\x80X@\x00\x00\x00\x00\x00\x00Y@\x00\x00\x00\x00\x00\x00Y@\x00\x00\x00\x00\x00\x00Y@\x00\x00\x00\x00\x00\x00Y@\x00\x00\x00\x00\x00\x00Y@\x00\x00\x00\x00\x00\x002@\x00\x00\x00\x00\x00\x00@@\x00\x00\x00\x00\x00\x00O@\x00\x00\x00\x00\x00\x00W@\x00\x00\x00\x00\x00\x80X@\x00\x00\x00\x00\x00\x00Y@\x00\x00\x00\x00\x00\x00Y@\x00\x00\x00\x00\x00\x00Y@\x00\x00\x00\x00\x00\x00Y@\x00\x00\x00\x00\x00\x00Y@\x00\x00\x00\x00\x00\x00Y@\x00\x00\x00\x00\x00\x00Y@\x00\x00\x00\x00\x00\x002@\x00\x00\x00\x00\x00\x00G@\x00\x00\x00\x00\x00\x80X@\x00\x00\x00\x00\x00\x00Y@\x00\x00\x00\x00\x00\x00Y@\x00\x00\x00\x00\x00\x00Y@\x00\x00\x00\x00\x00\x00Y@\x00\x00\x00\x00\x00\x00Y@\x00\x00\x00\x00\x00\x00Y@\x00\x00\x00\x00\x00\x00Y@\x00\x00\x00\x00\x00\x00Y@\x00\x00\x00\x00\x00\x00Y@\x00\x00\x00\x00\x00\x002@\x00\x00\x00\x00\x00\x00G@\x00\x00\x00\x00\x00\x00X@\x00\x00\x00\x00\x00\x00Y@\x00\x00\x00\x00\x00\x00Y@\x00\x00\x00\x00\x00\x00Y@\x00\x00\x00\x00\x00\x00Y@\x00\x00\x00\x00\x00\x00Y@\x00\x00\x00\x00\x00\x00Y@\x00\x00\x00\x00\x00\x00Y@\x00\x00\x00\x00\x00\x00Y@\x00\x00\x00\x00\x00\x00Y@\x00\x00\x00\x00\x00\x002@\x00\x00\x00\x00\x00\x00A@\x00\x00\x00\x00\x00\x00P@\x00\x00\x00\x00\x00\x00X@\x00\x00\x00\x00\x00\x00Y@\x00\x00\x00\x00\x00\x00Y@\x00\x00\x00\x00\x00\x00Y@\x00\x00\x00\x00\x00\x00Y@\x00\x00\x00\x00\x00\x00Y@\x00\x00\x00\x00\x00\x00Y@\x00\x00\x00\x00\x00\x00Y@\x00\x00\x00\x00\x00\x00Y@\x00\x00\x00\x00\x00\x004@\x00\x00\x00\x00\x00\x008@\x00\x00\x00\x00\x00\x006@\x00\x00\x00\x00\x00\x000@\x01\x00\x00\x00\x00\x00,@\x00\x00\x00\x00\x00\x00 @\x00\x00\x00\x00\x00\x00 @\x00\x00\x00\x00\x00\x00 @\x00\x00\x00\x00\x00\x00\x10@\x00\x00\x00\x00\x00\x00\x18@\x00\x00\x00\x00\x00\x00\x18@\x00\x00\x00\x00\x00\x00\x18@\x00\x00\x00\x00\x00\x004@\x00\x00\x00\x00\x00\x008@\x00\x00\x00\x00\x00\x00>@\x00\x00\x00\x00\x00\x00@@\x00\x00\x00\x00\x00\x00A@\x00\x00\x00\x00\x00\x00B@\x00\x00\x00\x00\x00\x00B@\x00\x00\x00\x00\x00\x00B@\x00\x00\x00\x00\x00\x00B@\x00\x00\x00\x00\x00\x00A@\x00\x00\x00\x00\x00\x00A@\x00\x00\x00\x00\x00\x00A@\x00\x00\x00\x00\x00\x004@\x00\x00\x00\x00\x00\x00>@\x00\x00\x00\x00\x00\x00C@\x00\x00\x00\x00\x00\x00I@\x00\x00\x00\x00\x00\x00J@\x00\x00\x00\x00\x00\x00P@\x00\x00\x00\x00\x00\x80P@\x00\x00\x00\x00\x00\x00Q@\x00\x00\x00\x00\x00\x80Q@\x00\x00\x00\x00\x00\x00R@\x00\x00\x00\x00\x00\x00R@\x00\x00\x00\x00\x00\x00Q@\x00\x00\x00\x00\x00\x004@\x00\x00\x00\x00\x00\x00>@\x00\x00\x00\x00\x00\x00J@\x00\x00\x00\x00\x00\x00N@\x00\x00\x00\x00\x00\x80P@\x00\x00\x00\x00\x00\x80Q@\x00\x00\x00\x00\x00\x80Q@\x00\x00\x00\x00\x00\x80P@\xff\xff\xff\xff\xff\xffL@\x00\x00\x00\x00\x00\x00H@\x00\x00\x00\x00\x00\x00G@\x00\x00\x00\x00\x00\x00F@\x00\x00\x00\x00\x00\x004@\x00\x00\x00\x00\x00\x00C@\x00\x00\x00\x00\x00\x00F@\x00\x00\x00\x00\x00\x00D@\x00\x00\x00\x00\x00\x00@@\x00\x00\x00\x00\x00\x000@\x00\x00\x00\x00\x00\x00\x18@\x00\x00\x00\x00\x00\x00\x00\x00\x00\x00\x00\x00\x00\x00\x00\x00\x00\x00\x00\x00\x00\x00\x00\x00\x00\x00\x00\x00\x00\x00\x00\x00\x00\x00\x00\x00\x00\x00\x00\x00\x00\x00\x00\x00\x00\x004@\x00\x00\x00\x00\x00\x00C@\x00\x00\x00\x00\x00\x00O@\x00\x00\x00\x00\x00\x80Q@\x00\x00\x00\x00\x00\x80S@\x00\x00\x00\x00\x00\x00V@\x00\x00\x00\x00\x00\x00W@\x00\x00\x00\x00\x00\x00X@\x00\x00\x00\x00\x00\x00X@\x00\x00\x00\x00\x00\x00X@\x00\x00\x00\x00\x00\x00X@\x00\x00\x00\x00\x00\x80W@\x00\x00\x00\x00\x00\x004@\x00\x00\x00\x00\x00\x00E@\x00\x00\x00\x00\x00\x00R@\x00\x00\x00\x00\x00\x80U@\x00\x00\x00\x00\x00\x80X@\x00\x00\x00\x00\x00\x00Y@\x00\x00\x00\x00\x00\x00Y@\x00\x00\x00\x00\x00\x00Y@\x00\x00\x00\x00\x00\x00Y@\x00\x00\x00\x00\x00\x00Y@\x00\x00\x00\x00\x00\x00Y@\x00\x00\x00\x00\x00\x00Y@\x00\x00\x00\x00\x00\x004@\x00\x00\x00\x00\x00\x00F@\x00\x00\x00\x00\x00\x80S@\x00\x00\x00\x00\x00\x80X@\x00\x00\x00\x00\x00\x00Y@\x00\x00\x00\x00\x00\x00Y@\x00\x00\x00\x00\x00\x00Y@\x00\x00\x00\x00\x00\x00Y@\x00\x00\x00\x00\x00\x00Y@\x00\x00\x00\x00\x00\x00Y@\x00\x00\x00\x00\x00\x00Y@\x00\x00\x00\x00\x00\x00Y@\x00\x00\x00\x00\x00\x004@\x00\x00\x00\x00\x00\x00E@\x00\x00\x00\x00\x00\x80R@\x00\x00\x00\x00\x00\x00X@\x00\x00\x00\x00\x00\x00Y@\x00\x00\x00\x00\x00\x00Y@\x00\x00\x00\x00\x00\x00Y@\x00\x00\x00\x00\x00\x00Y@\x00\x00\x00\x00\x00\x00Y@\x00\x00\x00\x00\x00\x00Y@\x00\x00\x00\x00\x00\x00Y@\x00\x00\x00\x00\x00\x00Y@\x00\x00\x00\x00\x00\x004@\x00\x00\x00\x00\x00\x00N@\x00\x00\x00\x00\x00\x00X@\x00\x00\x00\x00\x00\x00Y@\x00\x00\x00\x00\x00\x00Y@\x00\x00\x00\x00\x00\x00Y@\x00\x00\x00\x00\x00\x00Y@\x00\x00\x00\x00\x00\x00Y@\x00\x00\x00\x00\x00\x00Y@\x00\x00\x00\x00\x00\x00Y@\x00\x00\x00\x00\x00\x00Y@\x00\x00\x00\x00\x00\x00Y@\x00\x00\x00\x00\x00\x004@\x00\x00\x00\x00\x00\x00Q@\x00\x00\x00\x00\x00\x00Y@\x00\x00\x00\x00\x00\x00Y@\x00\x00\x00\x00\x00\x00Y@\x00\x00\x00\x00\x00\x00Y@\x00\x00\x00\x00\x00\x00Y@\x00\x00\x00\x00\x00\x00Y@\x00\x00\x00\x00\x00\x00Y@\x00\x00\x00\x00\x00\x00Y@\x00\x00\x00\x00\x00\x00Y@\x00\x00\x00\x00\x00\x00Y@\x00\x00\x00\x00\x00\x004@\x00\x00\x00\x00\x00\x00J@\x00\x00\x00\x00\x00\x80V@\x00\x00\x00\x00\x00\x00Y@\x00\x00\x00\x00\x00\x00Y@\x00\x00\x00\x00\x00\x00Y@\x00\x00\x00\x00\x00\x00Y@\x00\x00\x00\x00\x00\x00Y@\x00\x00\x00\x00\x00\x00Y@\x00\x00\x00\x00\x00\x00Y@\x00\x00\x00\x00\x00\x00Y@\x00\x00\x00\x00\x00\x00Y@\x00\x00\x00\x00\x00\x004@\x00\x00\x00\x00\x00\x00B@\x00\x00\x00\x00\x00\x80P@\x00\x00\x00\x00\x00\x80U@\x00\x00\x00\x00\x00\x80X@\x00\x00\x00\x00\x00\x00Y@\x00\x00\x00\x00\x00\x00Y@\x00\x00\x00\x00\x00\x00Y@\x00\x00\x00\x00\x00\x00Y@\x00\x00\x00\x00\x00\x00Y@\x00\x00\x00\x00\x00\x00Y@\x00\x00\x00\x00\x00\x00Y@\x00\x00\x00\x00\x00\x000@\x00\x00\x00\x00\x00\x004@\x00\x00\x00\x00\x00\x00:@\x00\x00\x00\x00\x00\x00>@\x00\x00\x00\x00\x00\x00@@\x00\x00\x00\x00\x00\x00A@\x00\x00\x00\x00\x00\x00B@\x00\x00\x00\x00\x00\x00A@\x01\x00\x00\x00\x00\x00<@\x01\x00\x00\x00\x00\x00<@\x00\x00\x00\x00\x00\x00:@\x00\x00\x00\x00\x00\x00:@\x00\x00\x00\x00\x00\x000@\x00\x00\x00\x00\x00\x006@\x00\x00\x00\x00\x00\x008@\x00\x00\x00\x00\x00\x00:@\x00\x00\x00\x00\x00\x00:@\x00\x00\x00\x00\x00\x00>@\x00\x00\x00\x00\x00\x00@@\x00\x00\x00\x00\x00\x00@@\x00\x00\x00\x00\x00\x00A@\x00\x00\x00\x00\x00\x00C@\x00\x00\x00\x00\x00\x00D@\x00\x00\x00\x00\x00\x00D@\x00\x00\x00\x00\x00\x000@\x00\x00\x00\x00\x00\x008@\x00\x00\x00\x00\x00\x00>@\x00\x00\x00\x00\x00\x00C@\x00\x00\x00\x00\x00\x00D@\x00\x00\x00\x00\x00\x00E@\x00\x00\x00\x00\x00\x00A@\x00\x00\x00\x00\x00\x008@\x00\x00\x00\x00\x00\x002@\x00\x00\x00\x00\x00\x00(@\x00\x00\x00\x00\x00\x00 @\x00\x00\x00\x00\x00\x00\x10@\x00\x00\x00\x00\x00\x000@\x00\x00\x00\x00\x00\x006@\x00\x00\x00\x00\x00\x00A@\x00\x00\x00\x00\x00\x00B@\x00\x00\x00\x00\x00\x00C@\x00\x00\x00\x00\x00\x00C@\x00\x00\x00\x00\x00\x00C@\x00\x00\x00\x00\x00\x00C@\x01\x00\x00\x00\x00\x00<@\x00\x00\x00\x00\x00\x008@\x00\x00\x00\x00\x00\x006@\x00\x00\x00\x00\x00\x002@\x00\x00\x00\x00\x00\x000@\x00\x00\x00\x00\x00\x00@@\x00\x00\x00\x00\x00\x00C@\x00\x00\x00\x00\x00\x00@@\x00\x00\x00\x00\x00\x00$@\x00\x00\x00\x00\x00\x00\x00@\x00\x00\x00\x00\x00\x00\x00\x00\x00\x00\x00\x00\x00\x00\x00\x00\x00\x00\x00\x00\x00\x00\x00\x00\x00\x00\x00\x00\x00\x00\x00\x00\x00\x00\x00\x00\x00\x00\x00\x00\x00\x00\x00\x00\x00\x00\x00\x00\x00\x00\x00\x00\x00\x000@\x00\x00\x00\x00\x00\x00A@\x00\x00\x00\x00\x00\x00D@\x00\x00\x00\x00\x00\x00F@\x00\x00\x00\x00\x00\x00E@\x00\x00\x00\x00\x00\x00>@\x00\x00\x00\x00\x00\x006@\x01\x00\x00\x00\x00\x00,@\x00\x00\x00\x00\x00\x00$@\x00\x00\x00\x00\x00\x00$@\x00\x00\x00\x00\x00\x00$@\x00\x00\x00\x00\x00\x00 @\x00\x00\x00\x00\x00\x000@\x00\x00\x00\x00\x00\x00:@\x00\x00\x00\x00\x00\x00A@\x00\x00\x00\x00\x00\x00E@\x00\x00\x00\x00\x00\x00J@\xff\xff\xff\xff\xff\xffL@\x00\x00\x00\x00\x00\x00O@\x00\x00\x00\x00\x00\x00P@\x00\x00\x00\x00\x00\x80P@\x00\x00\x00\x00\x00\x00Q@\x00\x00\x00\x00\x00\x00R@\x00\x00\x00\x00\x00\x80Q@\x00\x00\x00\x00\x00\x000@\x00\x00\x00\x00\x00\x00@@\x00\x00\x00\x00\x00\x00G@\xff\xff\xff\xff\xff\xffL@\x00\x00\x00\x00\x00\x80R@\x00\x00\x00\x00\x00\x00T@\x00\x00\x00\x00\x00\x00U@\x00\x00\x00\x00\x00\x00V@\x00\x00\x00\x00\x00\x80V@\x00\x00\x00\x00\x00\x80V@\x00\x00\x00\x00\x00\x80V@\x00\x00\x00\x00\x00\x00W@\x00\x00\x00\x00\x00\x000@\x00\x00\x00\x00\x00\x00@@\xff\xff\xff\xff\xff\xffL@\x00\x00\x00\x00\x00\x80S@\x00\x00\x00\x00\x00\x00U@\x00\x00\x00\x00\x00\x00W@\x00\x00\x00\x00\x00\x00W@\x00\x00\x00\x00\x00\x80W@\x00\x00\x00\x00\x00\x80X@\x00\x00\x00\x00\x00\x80X@\x00\x00\x00\x00\x00\x80X@\x00\x00\x00\x00\x00\x80X@\x00\x00\x00\x00\x00\x000@\x00\x00\x00\x00\x00\x00@@\x00\x00\x00\x00\x00\x00G@\x00\x00\x00\x00\x00\x00O@\x00\x00\x00\x00\x00\x80T@\x00\x00\x00\x00\x00\x80U@\x00\x00\x00\x00\x00\x00V@\x00\x00\x00\x00\x00\x00W@\x00\x00\x00\x00\x00\x80W@\x00\x00\x00\x00\x00\x80X@\x00\x00\x00\x00\x00\x80X@\x00\x00\x00\x00\x00\x80X@\x00\x00\x00\x00\x00\x000@\x01\x00\x00\x00\x00\x00L@\x00\x00\x00\x00\x00\x00U@\x00\x00\x00\x00\x00\x80X@\x00\x00\x00\x00\x00\x00Y@\x00\x00\x00\x00\x00\x00Y@\x00\x00\x00\x00\x00\x00Y@\x00\x00\x00\x00\x00\x80X@\x00\x00\x00\x00\x00\x80X@\x00\x00\x00\x00\x00\x80X@\x00\x00\x00\x00\x00\x80X@\x00\x00\x00\x00\x00\x80X@\x00\x00\x00\x00\x00\x000@\x00\x00\x00\x00\x00\x00E@\x00\x00\x00\x00\x00\x00S@\x00\x00\x00\x00\x00\x00V@\x00\x00\x00\x00\x00\x00Y@\x00\x00\x00\x00\x00\x00Y@\x00\x00\x00\x00\x00\x00Y@\x00\x00\x00\x00\x00\x00Y@\x00\x00\x00\x00\x00\x00Y@\x00\x00\x00\x00\x00\x00Y@\x00\x00\x00\x00\x00\x00Y@\x00\x00\x00\x00\x00\x00Y@\x00\x00\x00\x00\x00\x000@\x00\x00\x00\x00\x00\x00@@\x00\x00\x00\x00\x00\x00I@\x00\x00\x00\x00\x00\x80Q@\x00\x00\x00\x00\x00\x00U@\x00\x00\x00\x00\x00\x00W@\x00\x00\x00\x00\x00\x00Y@\x00\x00\x00\x00\x00\x00Y@\x00\x00\x00\x00\x00\x00Y@\x00\x00\x00\x00\x00\x00Y@\x00\x00\x00\x00\x00\x00Y@\x00\x00\x00\x00\x00\x00Y@\x00\x00\x00\x00\x00\x00\x18@\x00\x00\x00\x00\x00\x00\x18@\x00\x00\x00\x00\x00\x00\x18@\x00\x00\x00\x00\x00\x00\x10@\x00\x00\x00\x00\x00\x00\x10@\x00\x00\x00\x00\x00\x00\x18@\x00\x00\x00\x00\x00\x00\x18@\x00\x00\x00\x00\x00\x00\x18@\x00\x00\x00\x00\x00\x00\x18@\x00\x00\x00\x00\x00\x00\x18@\x00\x00\x00\x00\x00\x00\x18@\x00\x00\x00\x00\x00\x00\x18@\x00\x00\x00\x00\x00\x00\x18@\x00\x00\x00\x00\x00\x00 @\x00\x00\x00\x00\x00\x00$@\x00\x00\x00\x00\x00\x00(@\x00\x00\x00\x00\x00\x000@\x00\x00\x00\x00\x00\x000@\x00\x00\x00\x00\x00\x002@\x00\x00\x00\x00\x00\x002@\x00\x00\x00\x00\x00\x004@\x00\x00\x00\x00\x00\x006@\x01\x00\x00\x00\x00\x00<@\x01\x00\x00\x00\x00\x00<@\x00\x00\x00\x00\x00\x00\x18@\x01\x00\x00\x00\x00\x00,@\x00\x00\x00\x00\x00\x002@\x00\x00\x00\x00\x00\x00:@\x00\x00\x00\x00\x00\x00F@\x00\x00\x00\x00\x00\x00K@\x00\x00\x00\x00\x00\x80Q@\x00\x00\x00\x00\x00\x00S@\x00\x00\x00\x00\x00\x00T@\x00\x00\x00\x00\x00\x00U@\x00\x00\x00\x00\x00\x00U@\x00\x00\x00\x00\x00\x00V@\x00\x00\x00\x00\x00\x00\x18@\x01\x00\x00\x00\x00\x00,@\x00\x00\x00\x00\x00\x004@\x01\x00\x00\x00\x00\x00<@\x00\x00\x00\x00\x00\x00H@\x00\x00\x00\x00\x00\x80P@\x00\x00\x00\x00\x00\x80U@\x00\x00\x00\x00\x00\x80W@\x00\x00\x00\x00\x00\x80X@\x00\x00\x00\x00\x00\x80X@\x00\x00\x00\x00\x00\x00Y@\x00\x00\x00\x00\x00\x00Y@\x00\x00\x00\x00\x00\x00\x18@\x00\x00\x00\x00\x00\x000@\x00\x00\x00\x00\x00\x00J@\x00\x00\x00\x00\x00\x80T@\x00\x00\x00\x00\x00\x00X@\x00\x00\x00\x00\x00\x00Y@\x00\x00\x00\x00\x00\x00Y@\x00\x00\x00\x00\x00\x00Y@\x00\x00\x00\x00\x00\x00Y@\x00\x00\x00\x00\x00\x00Y@\x00\x00\x00\x00\x00\x00Y@\x00\x00\x00\x00\x00\x00Y@\x00\x00\x00\x00\x00\x00\x18@\x00\x00\x00\x00\x00\x000@\x00\x00\x00\x00\x00\x00:@\x00\x00\x00\x00\x00\x00K@\x00\x00\x00\x00\x00\x00R@\x00\x00\x00\x00\x00\x00U@\x00\x00\x00\x00\x00\x80V@\x00\x00\x00\x00\x00\x80W@\x00\x00\x00\x00\x00\x80X@\x00\x00\x00\x00\x00\x80X@\x00\x00\x00\x00\x00\x80X@\x00\x00\x00\x00\x00\x80X@\x00\x00\x00\x00\x00\x00\x18@\x00\x00\x00\x00\x00\x000@\x00\x00\x00\x00\x00\x00J@\x00\x00\x00\x00\x00\x00U@\x00\x00\x00\x00\x00\x00V@\x00\x00\x00\x00\x00\x00W@\x00\x00\x00\x00\x00\x80W@\x00\x00\x00\x00\x00\x80W@\x00\x00\x00\x00\x00\x00X@\x00\x00\x00\x00\x00\x80X@\x00\x00\x00\x00\x00\x00X@\x00\x00\x00\x00\x00\x00V@\x00\x00\x00\x00\x00\x00\x18@\x00\x00\x00\x00\x00\x004@\x00\x00\x00\x00\x00\x00P@\x00\x00\x00\x00\x00\x80T@\x00\x00\x00\x00\x00\x00X@\x00\x00\x00\x00\x00\x00Y@\x00\x00\x00\x00\x00\x00Y@\x00\x00\x00\x00\x00\x00Y@\x00\x00\x00\x00\x00\x00Y@\x00\x00\x00\x00\x00\x00Y@\x00\x00\x00\x00\x00\x00Y@\x00\x00\x00\x00\x00\x00Y@\x00\x00\x00\x00\x00\x00\x18@\x01\x00\x00\x00\x00\x00<@\x00\x00\x00\x00\x00\x80S@\x00\x00\x00\x00\x00\x80W@\x00\x00\x00\x00\x00\x00Y@\x00\x00\x00\x00\x00\x00Y@\x00\x00\x00\x00\x00\x00Y@\x00\x00\x00\x00\x00\x00Y@\x00\x00\x00\x00\x00\x00Y@\x00\x00\x00\x00\x00\x00Y@\x00\x00\x00\x00\x00\x00Y@\x00\x00\x00\x00\x00\x00Y@\x00\x00\x00\x00\x00\x00\x18@\x00\x00\x00\x00\x00\x00>@\x00\x00\x00\x00\x00\x80P@\x00\x00\x00\x00\x00\x80V@\x00\x00\x00\x00\x00\x00Y@\x00\x00\x00\x00\x00\x00Y@\x00\x00\x00\x00\x00\x00Y@\x00\x00\x00\x00\x00\x00Y@\x00\x00\x00\x00\x00\x00Y@\x00\x00\x00\x00\x00\x00Y@\x00\x00\x00\x00\x00\x00Y@\x00\x00\x00\x00\x00\x00Y@\x00\x00\x00\x00\x00\x00\x18@\x01\x00\x00\x00\x00\x00L@\x00\x00\x00\x00\x00\x00X@\x00\x00\x00\x00\x00\x00Y@\x00\x00\x00\x00\x00\x00Y@\x00\x00\x00\x00\x00\x00Y@\x00\x00\x00\x00\x00\x00Y@\x00\x00\x00\x00\x00\x00Y@\x00\x00\x00\x00\x00\x00Y@\x00\x00\x00\x00\x00\x00Y@\x00\x00\x00\x00\x00\x00Y@\x00\x00\x00\x00\x00\x00Y@\x00\x00\x00\x00\x00\x00\x18@\x01\x00\x00\x00\x00\x00<@\x00\x00\x00\x00\x00\x00P@\x00\x00\x00\x00\x00\x80W@\x00\x00\x00\x00\x00\x00Y@\x00\x00\x00\x00\x00\x00Y@\x00\x00\x00\x00\x00\x00Y@\x00\x00\x00\x00\x00\x00Y@\x00\x00\x00\x00\x00\x00Y@\x00\x00\x00\x00\x00\x00Y@\x00\x00\x00\x00\x00\x00Y@\x00\x00\x00\x00\x00\x00Y@\x00\x00\x00\x00\x00\x00\x18@\x00\x00\x00\x00\x00\x008@\x00\x00\x00\x00\x00\x00O@\x00\x00\x00\x00\x00\x80W@\x00\x00\x00\x00\x00\x80X@\x00\x00\x00\x00\x00\x00Y@\x00\x00\x00\x00\x00\x00Y@\x00\x00\x00\x00\x00\x00Y@\x00\x00\x00\x00\x00\x00Y@\x00\x00\x00\x00\x00\x00Y@\x00\x00\x00\x00\x00\x00Y@\x00\x00\x00\x00\x00\x00Y@\x00\x00\x00\x00\x00\x00S@\x00\x00\x00\x00\x00\x80P@\x00\x00\x00\x00\x00\x00Q@\x00\x00\x00\x00\x00\x00Q@\x00\x00\x00\x00\x00\x00Q@\x00\x00\x00\x00\x00\x80Q@\x00\x00\x00\x00\x00\x80R@\x00\x00\x00\x00\x00\x80S@\x00\x00\x00\x00\x00\x80T@\x00\x00\x00\x00\x00\x80T@\x00\x00\x00\x00\x00\x80T@\x00\x00\x00\x00\x00\x80T@\x00\x00\x00\x00\x00\x00S@\x00\x00\x00\x00\x00\x80P@\x00\x00\x00\x00\x00\x00O@\x00\x00\x00\x00\x00\x00I@\x00\x00\x00\x00\x00\x00D@\x00\x00\x00\x00\x00\x00B@\x00\x00\x00\x00\x00\x00B@\x00\x00\x00\x00\x00\x00>@\x00\x00\x00\x00\x00\x006@\x00\x00\x00\x00\x00\x008@\x00\x00\x00\x00\x00\x008@\x00\x00\x00\x00\x00\x008@\x00\x00\x00\x00\x00\x00S@\x00\x00\x00\x00\x00\x00R@\x00\x00\x00\x00\x00\x00O@\x00\x00\x00\x00\x00\x00K@\x00\x00\x00\x00\x00\x00F@\x00\x00\x00\x00\x00\x00A@\x00\x00\x00\x00\x00\x00@@\x00\x00\x00\x00\x00\x00>@\x00\x00\x00\x00\x00\x008@\x00\x00\x00\x00\x00\x006@\x00\x00\x00\x00\x00\x002@\x00\x00\x00\x00\x00\x000@\x00\x00\x00\x00\x00\x00S@\x00\x00\x00\x00\x00\x80T@\x00\x00\x00\x00\x00\x80T@\x00\x00\x00\x00\x00\x80T@\x00\x00\x00\x00\x00\x80T@\x00\x00\x00\x00\x00\x80T@\x00\x00\x00\x00\x00\x00V@\x00\x00\x00\x00\x00\x00V@\x00\x00\x00\x00\x00\x80V@\x00\x00\x00\x00\x00\x80U@\x00\x00\x00\x00\x00\x00U@\x00\x00\x00\x00\x00\x00U@\x00\x00\x00\x00\x00\x00S@\x00\x00\x00\x00\x00\x80Q@\x00\x00\x00\x00\x00\x00N@\x01\x00\x00\x00\x00\x00L@\x00\x00\x00\x00\x00\x00G@\x00\x00\x00\x00\x00\x000@\x00\x00\x00\x00\x00\x00\x18@\x00\x00\x00\x00\x00\x00\x18@\x00\x00\x00\x00\x00\x00\x00@\x00\x00\x00\x00\x00\x00\x00\x00\x00\x00\x00\x00\x00\x00\x00\x00\x00\x00\x00\x00\x00\x00\x00\x00\x00\x00\x00\x00\x00\x00S@\x00\x00\x00\x00\x00\x80R@\x00\x00\x00\x00\x00\x00Q@\x00\x00\x00\x00\x00\x00P@\x01\x00\x00\x00\x00\x00L@\x00\x00\x00\x00\x00\x00G@\x00\x00\x00\x00\x00\x00E@\x00\x00\x00\x00\x00\x00@@\x00\x00\x00\x00\x00\x008@\x00\x00\x00\x00\x00\x006@\x00\x00\x00\x00\x00\x004@\x00\x00\x00\x00\x00\x004@\x00\x00\x00\x00\x00\x00S@\x00\x00\x00\x00\x00\x00O@\x00\x00\x00\x00\x00\x00F@\x00\x00\x00\x00\x00\x00C@\x00\x00\x00\x00\x00\x006@\x00\x00\x00\x00\x00\x00(@\x00\x00\x00\x00\x00\x00$@\x00\x00\x00\x00\x00\x00 @\x00\x00\x00\x00\x00\x00\x18@\x00\x00\x00\x00\x00\x00\x10@\x00\x00\x00\x00\x00\x00\x10@\x00\x00\x00\x00\x00\x00\x10@\x00\x00\x00\x00\x00\x00S@\x00\x00\x00\x00\x00\x80P@\x00\x00\x00\x00\x00\x00F@\x00\x00\x00\x00\x00\x00A@\x00\x00\x00\x00\x00\x008@\x00\x00\x00\x00\x00\x000@\x00\x00\x00\x00\x00\x00$@\x00\x00\x00\x00\x00\x00\x18@\x00\x00\x00\x00\x00\x00\x18@\x00\x00\x00\x00\x00\x00\x18@\x00\x00\x00\x00\x00\x00\x18@\x00\x00\x00\x00\x00\x00\x00@\x00\x00\x00\x00\x00\x00S@\x00\x00\x00\x00\x00\x80Q@\x00\x00\x00\x00\x00\x00P@\x00\x00\x00\x00\x00\x00G@\x00\x00\x00\x00\x00\x00E@\x00\x00\x00\x00\x00\x00E@\x00\x00\x00\x00\x00\x00>@\x00\x00\x00\x00\x00\x00:@\x00\x00\x00\x00\x00\x002@\x00\x00\x00\x00\x00\x002@\x01\x00\x00\x00\x00\x00,@\x00\x00\x00\x00\x00\x00(@\x00\x00\x00\x00\x00\x00S@\x01\x00\x00\x00\x00\x00L@\x00\x00\x00\x00\x00\x00C@\x00\x00\x00\x00\x00\x006@\x00\x00\x00\x00\x00\x002@\x00\x00\x00\x00\x00\x00\x10@\x00\x00\x00\x00\x00\x00\x00@\x00\x00\x00\x00\x00\x00\x00@\x00\x00\x00\x00\x00\x00\x00@\x00\x00\x00\x00\x00\x00\x00\x00\x00\x00\x00\x00\x00\x00\x00\x00\x00\x00\x00\x00\x00\x00\x00\x00\x00\x00\x00\x00\x00\x00S@\x00\x00\x00\x00\x00\x00G@\x00\x00\x00\x00\x00\x008@\x00\x00\x00\x00\x00\x00$@\x00\x00\x00\x00\x00\x00\x10@\x00\x00\x00\x00\x00\x00\x00\x00\x00\x00\x00\x00\x00\x00\x00\x00\x00\x00\x00\x00\x00\x00\x00\x00\x00\x00\x00\x00\x00\x00\x00\x00\x00\x00\x00\x00\x00\x00\x00\x00\x00\x00\x00\x00\x00\x00\x00\x00\x00\x00\x00\x00\x00\x00\x00\x00\x00\x00\x00\x00\x00\x00S@\x00\x00\x00\x00\x00\x00K@\x00\x00\x00\x00\x00\x00:@\x00\x00\x00\x00\x00\x004@\x00\x00\x00\x00\x00\x00 @\x00\x00\x00\x00\x00\x00\x10@\x00\x00\x00\x00\x00\x00\x00@\x00\x00\x00\x00\x00\x00\x00@\x00\x00\x00\x00\x00\x00\x00\x00\x00\x00\x00\x00\x00\x00\x00\x00\x00\x00\x00\x00\x00\x00\x00\x00\x00\x00\x00\x00\x00\x00\x00\x00\x00\x00\x00\x00\x00\x00S@\x01\x00\x00\x00\x00\x00L@\x00\x00\x00\x00\x00\x00C@\x00\x00\x00\x00\x00\x00:@\x00\x00\x00\x00\x00\x006@\x00\x00\x00\x00\x00\x00$@\x00\x00\x00\x00\x00\x00 @\x00\x00\x00\x00\x00\x00\x00@\x00\x00\x00\x00\x00\x00\x00\x00\x00\x00\x00\x00\x00\x00\x00\x00\x00\x00\x00\x00\x00\x00\x00\x00\x00\x00\x00\x00\x00\x00\x00\x00\x00\x00\x00\x00\x00\x80Q@\x00\x00\x00\x00\x00\x00Q@\x00\x00\x00\x00\x00\x80P@\x00\x00\x00\x00\x00\x00Q@\x00\x00\x00\x00\x00\x80Q@\x00\x00\x00\x00\x00\x00R@\x00\x00\x00\x00\x00\x80Q@\x00\x00\x00\x00\x00\x00R@\x00\x00\x00\x00\x00\x00R@\x00\x00\x00\x00\x00\x80R@\x00\x00\x00\x00\x00\x80R@\x00\x00\x00\x00\x00\x80S@\x00\x00\x00\x00\x00\x80Q@\x00\x00\x00\x00\x00\x00R@\x00\x00\x00\x00\x00\x00S@\x00\x00\x00\x00\x00\x80U@\x00\x00\x00\x00\x00\x80V@\x00\x00\x00\x00\x00\x00X@\x00\x00\x00\x00\x00\x00X@\x00\x00\x00\x00\x00\x00X@\x00\x00\x00\x00\x00\x00Y@\x00\x00\x00\x00\x00\x00Y@\x00\x00\x00\x00\x00\x00Y@\x00\x00\x00\x00\x00\x00Y@\x00\x00\x00\x00\x00\x80Q@\x00\x00\x00\x00\x00\x80R@\x00\x00\x00\x00\x00\x00T@\x00\x00\x00\x00\x00\x80U@\x00\x00\x00\x00\x00\x80V@\x00\x00\x00\x00\x00\x80W@\x00\x00\x00\x00\x00\x00X@\x00\x00\x00\x00\x00\x80X@\x00\x00\x00\x00\x00\x80X@\x00\x00\x00\x00\x00\x00Y@\x00\x00\x00\x00\x00\x00Y@\x00\x00\x00\x00\x00\x00Y@\x00\x00\x00\x00\x00\x80Q@\x00\x00\x00\x00\x00\x00Q@\x00\x00\x00\x00\x00\x00J@\x00\x00\x00\x00\x00\x00D@\x00\x00\x00\x00\x00\x00K@\x00\x00\x00\x00\x00\x00T@\x00\x00\x00\x00\x00\x80X@\x00\x00\x00\x00\x00\x00Y@\x00\x00\x00\x00\x00\x00Y@\x00\x00\x00\x00\x00\x00Y@\x00\x00\x00\x00\x00\x00Y@\x00\x00\x00\x00\x00\x00Y@\x00\x00\x00\x00\x00\x80Q@\x00\x00\x00\x00\x00\x00S@\x00\x00\x00\x00\x00\x00Q@\x00\x00\x00\x00\x00\x00N@\x00\x00\x00\x00\x00\x00N@\x00\x00\x00\x00\x00\x00R@\x00\x00\x00\x00\x00\x80V@\x00\x00\x00\x00\x00\x00X@\x00\x00\x00\x00\x00\x00Y@\x00\x00\x00\x00\x00\x00Y@\x00\x00\x00\x00\x00\x00Y@\x00\x00\x00\x00\x00\x00Y@\x00\x00\x00\x00\x00\x80Q@\x00\x00\x00\x00\x00\x80R@\x00\x00\x00\x00\x00\x80R@\x00\x00\x00\x00\x00\x00S@\x00\x00\x00\x00\x00\x00S@\x00\x00\x00\x00\x00\x00S@\x00\x00\x00\x00\x00\x80S@\x00\x00\x00\x00\x00\x80S@\x00\x00\x00\x00\x00\x80U@\x00\x00\x00\x00\x00\x80W@\x00\x00\x00\x00\x00\x80X@\x00\x00\x00\x00\x00\x00X@\x00\x00\x00\x00\x00\x80Q@\x00\x00\x00\x00\x00\x80R@\x00\x00\x00\x00\x00\x00S@\x00\x00\x00\x00\x00\x00S@\x00\x00\x00\x00\x00\x00T@\x00\x00\x00\x00\x00\x80U@\x00\x00\x00\x00\x00\x00X@\x00\x00\x00\x00\x00\x00Y@\x00\x00\x00\x00\x00\x00Y@\x00\x00\x00\x00\x00\x00Y@\x00\x00\x00\x00\x00\x00Y@\x00\x00\x00\x00\x00\x00Y@\x00\x00\x00\x00\x00\x80Q@\x00\x00\x00\x00\x00\x80R@\x00\x00\x00\x00\x00\x00R@\x00\x00\x00\x00\x00\x80Q@\x00\x00\x00\x00\x00\x80R@\x00\x00\x00\x00\x00\x80T@\x00\x00\x00\x00\x00\x00U@\x00\x00\x00\x00\x00\x00U@\x00\x00\x00\x00\x00\x00U@\x00\x00\x00\x00\x00\x80U@\x00\x00\x00\x00\x00\x00V@\x00\x00\x00\x00\x00\x80V@\x00\x00\x00\x00\x00\x80Q@\x00\x00\x00\x00\x00\x00S@\x00\x00\x00\x00\x00\x80S@\x00\x00\x00\x00\x00\x00U@\x00\x00\x00\x00\x00\x80U@\x00\x00\x00\x00\x00\x80U@\x00\x00\x00\x00\x00\x00V@\x00\x00\x00\x00\x00\x80V@\x00\x00\x00\x00\x00\x80V@\x00\x00\x00\x00\x00\x00V@\x00\x00\x00\x00\x00\x00V@\x00\x00\x00\x00\x00\x00V@\x00\x00\x00\x00\x00\x80Q@\x00\x00\x00\x00\x00\x80T@\x00\x00\x00\x00\x00\x00W@\x00\x00\x00\x00\x00\x00X@\x00\x00\x00\x00\x00\x80X@\x00\x00\x00\x00\x00\x00Y@\x00\x00\x00\x00\x00\x00Y@\x00\x00\x00\x00\x00\x00Y@\x00\x00\x00\x00\x00\x00Y@\x00\x00\x00\x00\x00\x00Y@\x00\x00\x00\x00\x00\x00Y@\x00\x00\x00\x00\x00\x00Y@\x00\x00\x00\x00\x00\x80Q@\x00\x00\x00\x00\x00\x00V@\x00\x00\x00\x00\x00\x00X@\x00\x00\x00\x00\x00\x00Y@\x00\x00\x00\x00\x00\x00Y@\x00\x00\x00\x00\x00\x00Y@\x00\x00\x00\x00\x00\x00Y@\x00\x00\x00\x00\x00\x00Y@\x00\x00\x00\x00\x00\x00Y@\x00\x00\x00\x00\x00\x00Y@\x00\x00\x00\x00\x00\x00Y@\x00\x00\x00\x00\x00\x00Y@\x00\x00\x00\x00\x00\x80Q@\x00\x00\x00\x00\x00\x80W@\x00\x00\x00\x00\x00\x00Y@\x00\x00\x00\x00\x00\x00Y@\x00\x00\x00\x00\x00\x00Y@\x00\x00\x00\x00\x00\x00Y@\x00\x00\x00\x00\x00\x00Y@\x00\x00\x00\x00\x00\x00Y@\x00\x00\x00\x00\x00\x00Y@\x00\x00\x00\x00\x00\x00Y@\x00\x00\x00\x00\x00\x00Y@\x00\x00\x00\x00\x00\x00Y@\x00\x00\x00\x00\x00\x80Q@\x00\x00\x00\x00\x00\x80U@\x00\x00\x00\x00\x00\x80X@\x00\x00\x00\x00\x00\x00Y@\x00\x00\x00\x00\x00\x00Y@\x00\x00\x00\x00\x00\x00Y@\x00\x00\x00\x00\x00\x00Y@\x00\x00\x00\x00\x00\x00Y@\x00\x00\x00\x00\x00\x00Y@\x00\x00\x00\x00\x00\x00Y@\x00\x00\x00\x00\x00\x00Y@\x00\x00\x00\x00\x00\x00Y@\x00\x00\x00\x00\x00\x00Y@\x00\x00\x00\x00\x00\x00Y@\x00\x00\x00\x00\x00\x00Y@\x00\x00\x00\x00\x00\x00Y@\x00\x00\x00\x00\x00\x00Y@\x00\x00\x00\x00\x00\x00Y@\x00\x00\x00\x00\x00\x00Y@\x00\x00\x00\x00\x00\x00Y@\x00\x00\x00\x00\x00\x00Y@\x00\x00\x00\x00\x00\x00Y@\x00\x00\x00\x00\x00\x00Y@\x00\x00\x00\x00\x00\x00Y@\x00\x00\x00\x00\x00\x00Y@\x00\x00\x00\x00\x00\x00Y@\x00\x00\x00\x00\x00\x00Y@\x00\x00\x00\x00\x00\x00Y@\x00\x00\x00\x00\x00\x00Y@\x00\x00\x00\x00\x00\x00Y@\x00\x00\x00\x00\x00\x00Y@\x00\x00\x00\x00\x00\x00Y@\x00\x00\x00\x00\x00\x00Y@\x00\x00\x00\x00\x00\x00Y@\x00\x00\x00\x00\x00\x00Y@\x00\x00\x00\x00\x00\x00Y@\x00\x00\x00\x00\x00\x00Y@\x00\x00\x00\x00\x00\x00Y@\x00\x00\x00\x00\x00\x00Y@\x00\x00\x00\x00\x00\x00Y@\x00\x00\x00\x00\x00\x80X@\x00\x00\x00\x00\x00\x00Y@\x00\x00\x00\x00\x00\x00Y@\x00\x00\x00\x00\x00\x00Y@\x00\x00\x00\x00\x00\x00Y@\x00\x00\x00\x00\x00\x00Y@\x00\x00\x00\x00\x00\x00Y@\x00\x00\x00\x00\x00\x00Y@\x00\x00\x00\x00\x00\x00Y@\x00\x00\x00\x00\x00\x00Y@\x00\x00\x00\x00\x00\x80X@\x00\x00\x00\x00\x00\x80W@\x00\x00\x00\x00\x00\x80T@\x00\x00\x00\x00\x00\x80S@\x00\x00\x00\x00\x00\x80Q@\x00\x00\x00\x00\x00\x00Q@\x00\x00\x00\x00\x00\x00Q@\x00\x00\x00\x00\x00\x00P@\x00\x00\x00\x00\x00\x00P@\x00\x00\x00\x00\x00\x00P@\x00\x00\x00\x00\x00\x00Y@\x00\x00\x00\x00\x00\x00Y@\x00\x00\x00\x00\x00\x80W@\x00\x00\x00\x00\x00\x00T@\x00\x00\x00\x00\x00\x80Q@\x00\x00\x00\x00\x00\x00O@\x00\x00\x00\x00\x00\x00A@\x00\x00\x00\x00\x00\x004@\x00\x00\x00\x00\x00\x000@\x00\x00\x00\x00\x00\x00(@\x00\x00\x00\x00\x00\x00\x18@\x00\x00\x00\x00\x00\x00\x00@\x00\x00\x00\x00\x00\x00Y@\x00\x00\x00\x00\x00\x00Y@\x00\x00\x00\x00\x00\x00W@\x00\x00\x00\x00\x00\x00T@\xff\xff\xff\xff\xff\xffL@\x00\x00\x00\x00\x00\x00D@\x01\x00\x00\x00\x00\x00<@\x00\x00\x00\x00\x00\x00:@\x00\x00\x00\x00\x00\x006@\x00\x00\x00\x00\x00\x002@\x00\x00\x00\x00\x00\x002@\x00\x00\x00\x00\x00\x002@\x00\x00\x00\x00\x00\x00Y@\x00\x00\x00\x00\x00\x00Y@\x00\x00\x00\x00\x00\x00W@\x00\x00\x00\x00\x00\x00R@\x00\x00\x00\x00\x00\x00P@\x00\x00\x00\x00\x00\x00J@\x00\x00\x00\x00\x00\x00I@\x00\x00\x00\x00\x00\x00H@\x00\x00\x00\x00\x00\x00E@\x00\x00\x00\x00\x00\x00E@\x00\x00\x00\x00\x00\x00D@\x00\x00\x00\x00\x00\x00D@\x00\x00\x00\x00\x00\x00Y@\x00\x00\x00\x00\x00\x80X@\x00\x00\x00\x00\x00\x80T@\x00\x00\x00\x00\x00\x00Q@\x00\x00\x00\x00\x00\x00G@\x00\x00\x00\x00\x00\x00C@\x00\x00\x00\x00\x00\x00:@\x00\x00\x00\x00\x00\x002@\x00\x00\x00\x00\x00\x000@\x00\x00\x00\x00\x00\x00(@\x00\x00\x00\x00\x00\x00\x18@\x00\x00\x00\x00\x00\x00\x00@\x00\x00\x00\x00\x00\x00Y@\x00\x00\x00\x00\x00\x00Y@\x00\x00\x00\x00\x00\x00W@\x00\x00\x00\x00\x00\x00Q@\x00\x00\x00\x00\x00\x00G@\x00\x00\x00\x00\x00\x00:@\x00\x00\x00\x00\x00\x000@\x00\x00\x00\x00\x00\x00 @\x00\x00\x00\x00\x00\x00\x18@\x00\x00\x00\x00\x00\x00\x00@\x00\x00\x00\x00\x00\x00\x00@\x00\x00\x00\x00\x00\x00\x00@\x00\x00\x00\x00\x00\x00Y@\x00\x00\x00\x00\x00\x00Y@\x00\x00\x00\x00\x00\x80S@\x00\x00\x00\x00\x00\x00F@\x00\x00\x00\x00\x00\x008@\x00\x00\x00\x00\x00\x00(@\x00\x00\x00\x00\x00\x00\x18@\x00\x00\x00\x00\x00\x00\x10@\x00\x00\x00\x00\x00\x00\x00\x00\x00\x00\x00\x00\x00\x00\x00\x00\x00\x00\x00\x00\x00\x00\x00\x00\x00\x00\x00\x00\x00\x00\x00\x00\x00\x00\x00\x00\x00\x00Y@\x00\x00\x00\x00\x00\x80U@\x00\x00\x00\x00\x00\x00:@\x00\x00\x00\x00\x00\x00 @\x00\x00\x00\x00\x00\x00\x00\x00\x00\x00\x00\x00\x00\x00\x00\x00\x00\x00\x00\x00\x00\x00\x00\x00\x00\x00\x00\x00\x00\x00\x00\x00\x00\x00\x00\x00\x00\x00\x00\x00\x00\x00\x00\x00\x00\x00\x00\x00\x00\x00\x00\x00\x00\x00\x00\x00\x00\x00\x00\x00\x00\x00\x00\x00\x00\x00\x00\x00\x00\x00Y@\x00\x00\x00\x00\x00\x80W@\x00\x00\x00\x00\x00\x00I@\x00\x00\x00\x00\x00\x002@\x00\x00\x00\x00\x00\x00\x18@\x00\x00\x00\x00\x00\x00\x00\x00\x00\x00\x00\x00\x00\x00\x00\x00\x00\x00\x00\x00\x00\x00\x00\x00\x00\x00\x00\x00\x00\x00\x00\x00\x00\x00\x00\x00\x00\x00\x00\x00\x00\x00\x00\x00\x00\x00\x00\x00\x00\x00\x00\x00\x00\x00\x00\x00\x00\x00\x00\x00\x00\x00Y@\x00\x00\x00\x00\x00\x00Y@\x00\x00\x00\x00\x00\x00W@\x00\x00\x00\x00\x00\x80P@\x00\x00\x00\x00\x00\x00B@\x00\x00\x00\x00\x00\x00(@\x00\x00\x00\x00\x00\x00\x18@\x00\x00\x00\x00\x00\x00\x00\x00\x00\x00\x00\x00\x00\x00\x00\x00\x00\x00\x00\x00\x00\x00\x00\x00\x00\x00\x00\x00\x00\x00\x00\x00\x00\x00\x00\x00\x00\x00\x00\x00\x00\x00\x00\x00\x00\x80X@\x00\x00\x00\x00\x00\x80X@\x00\x00\x00\x00\x00\x80X@\x00\x00\x00\x00\x00\x00Y@\x00\x00\x00\x00\x00\x00Y@\x00\x00\x00\x00\x00\x00Y@\x00\x00\x00\x00\x00\x00Y@\x00\x00\x00\x00\x00\x00Y@\x00\x00\x00\x00\x00\x00Y@\x00\x00\x00\x00\x00\x00Y@\x00\x00\x00\x00\x00\x00Y@\x00\x00\x00\x00\x00\x00Y@\x00\x00\x00\x00\x00\x80X@\x00\x00\x00\x00\x00\x80X@\x00\x00\x00\x00\x00\x80X@\x00\x00\x00\x00\x00\x80X@\x00\x00\x00\x00\x00\x80X@\x00\x00\x00\x00\x00\x80X@\x00\x00\x00\x00\x00\x00Y@\x00\x00\x00\x00\x00\x00Y@\x00\x00\x00\x00\x00\x00Y@\x00\x00\x00\x00\x00\x00Y@\x00\x00\x00\x00\x00\x00Y@\x00\x00\x00\x00\x00\x00Y@\x00\x00\x00\x00\x00\x80X@\x00\x00\x00\x00\x00\x80X@\x00\x00\x00\x00\x00\x00X@\x00\x00\x00\x00\x00\x00X@\x00\x00\x00\x00\x00\x80W@\x00\x00\x00\x00\x00\x80W@\x00\x00\x00\x00\x00\x80W@\x00\x00\x00\x00\x00\x00X@\x00\x00\x00\x00\x00\x80X@\x00\x00\x00\x00\x00\x80X@\x00\x00\x00\x00\x00\x00Y@\x00\x00\x00\x00\x00\x00Y@\x00\x00\x00\x00\x00\x80X@\x00\x00\x00\x00\x00\x80X@\x00\x00\x00\x00\x00\x80X@\x00\x00\x00\x00\x00\x80X@\x00\x00\x00\x00\x00\x00X@\x00\x00\x00\x00\x00\x00X@\x00\x00\x00\x00\x00\x00X@\x00\x00\x00\x00\x00\x00X@\x00\x00\x00\x00\x00\x00X@\x00\x00\x00\x00\x00\x00X@\x00\x00\x00\x00\x00\x00X@\x00\x00\x00\x00\x00\x00X@\x00\x00\x00\x00\x00\x80X@\x00\x00\x00\x00\x00\x00X@\x00\x00\x00\x00\x00\x00X@\x00\x00\x00\x00\x00\x00X@\x00\x00\x00\x00\x00\x80W@\x00\x00\x00\x00\x00\x80V@\x00\x00\x00\x00\x00\x00V@\x00\x00\x00\x00\x00\x80X@\x00\x00\x00\x00\x00\x00X@\x00\x00\x00\x00\x00\x00X@\x00\x00\x00\x00\x00\x80V@\x00\x00\x00\x00\x00\x80V@\x00\x00\x00\x00\x00\x80X@\x00\x00\x00\x00\x00\x00X@\x00\x00\x00\x00\x00\x80W@\x00\x00\x00\x00\x00\x80U@\x00\x00\x00\x00\x00\x80T@\x00\x00\x00\x00\x00\x00S@\x00\x00\x00\x00\x00\x00S@\x00\x00\x00\x00\x00\x00R@\x00\x00\x00\x00\x00\x00R@\x00\x00\x00\x00\x00\x80S@\x00\x00\x00\x00\x00\x80S@\x00\x00\x00\x00\x00\x00T@\x00\x00\x00\x00\x00\x80X@\x00\x00\x00\x00\x00\x00X@\x00\x00\x00\x00\x00\x00W@\x00\x00\x00\x00\x00\x80U@\x00\x00\x00\x00\x00\x00U@\x00\x00\x00\x00\x00\x00T@\x00\x00\x00\x00\x00\x80R@\x00\x00\x00\x00\x00\x00N@\x00\x00\x00\x00\x00\x00N@\x01\x00\x00\x00\x00\x00L@\x01\x00\x00\x00\x00\x00L@\xff\xff\xff\xff\xff\xffL@\x00\x00\x00\x00\x00\x80X@\x00\x00\x00\x00\x00\x00W@\x00\x00\x00\x00\x00\x80T@\x00\x00\x00\x00\x00\x80R@\x00\x00\x00\x00\x00\x80P@\x00\x00\x00\x00\x00\x80P@\x00\x00\x00\x00\x00\x00P@\x00\x00\x00\x00\x00\x00O@\x00\x00\x00\x00\x00\x00N@\x00\x00\x00\x00\x00\x00O@\x00\x00\x00\x00\x00\x80P@\x00\x00\x00\x00\x00\x80P@\x00\x00\x00\x00\x00\x80X@\x00\x00\x00\x00\x00\x80U@\x00\x00\x00\x00\x00\x80Q@\x00\x00\x00\x00\x00\x00K@\x00\x00\x00\x00\x00\x00K@\x00\x00\x00\x00\x00\x00K@\x00\x00\x00\x00\x00\x00R@\x00\x00\x00\x00\x00\x80S@\x00\x00\x00\x00\x00\x00U@\x00\x00\x00\x00\x00\x00V@\x00\x00\x00\x00\x00\x80W@\x00\x00\x00\x00\x00\x80W@\x00\x00\x00\x00\x00\x80X@\x00\x00\x00\x00\x00\x80W@\x00\x00\x00\x00\x00\x00S@\x00\x00\x00\x00\x00\x00K@\x00\x00\x00\x00\x00\x00F@\x00\x00\x00\x00\x00\x00C@\x01\x00\x00\x00\x00\x00<@\x00\x00\x00\x00\x00\x008@\x00\x00\x00\x00\x00\x002@\x01\x00\x00\x00\x00\x00,@\x00\x00\x00\x00\x00\x00(@\x00\x00\x00\x00\x00\x00 @\x00\x00\x00\x00\x00\x80X@\x00\x00\x00\x00\x00\x00T@\x00\x00\x00\x00\x00\x00E@\x00\x00\x00\x00\x00\x004@\x00\x00\x00\x00\x00\x00\x18@\x00\x00\x00\x00\x00\x00\x00@\x00\x00\x00\x00\x00\x00\x00\x00\x00\x00\x00\x00\x00\x00\x00\x00\x00\x00\x00\x00\x00\x00\x00\x00\x00\x00\x00\x00\x00\x00\x00\x00\x00\x00\x00\x00\x00\x00\x00\x00\x00\x00\x00\x00\x00\x00\x00\x00\x00\x00\x00\x00\x00\x80X@\x00\x00\x00\x00\x00\x80T@\x00\x00\x00\x00\x00\x00I@\x00\x00\x00\x00\x00\x006@\x00\x00\x00\x00\x00\x00\x18@\x00\x00\x00\x00\x00\x00\x00\x00\x00\x00\x00\x00\x00\x00\x00\x00\x00\x00\x00\x00\x00\x00\x00\x00\x00\x00\x00\x00\x00\x00\x00\x00\x00\x00\x00\x00\x00\x00\x00\x00\x00\x00\x00\x00\x00\x00\x00\x00\x00\x00\x00\x00\x00\x00\x00\x00\x00\x00\x00\x00\x00\x80X@\x00\x00\x00\x00\x00\x80W@\x00\x00\x00\x00\x00\x00T@\xff\xff\xff\xff\xff\xffL@\x00\x00\x00\x00\x00\x00G@\x01\x00\x00\x00\x00\x00<@\x00\x00\x00\x00\x00\x000@\x00\x00\x00\x00\x00\x00\x00@\x00\x00\x00\x00\x00\x00\x00\x00\x00\x00\x00\x00\x00\x00\x00\x00\x00\x00\x00\x00\x00\x00\x00\x00\x00\x00\x00\x00\x00\x00\x00\x00\x00\x00\x00\x00\x00\x80X@\x00\x00\x00\x00\x00\x80X@\x00\x00\x00\x00\x00\x80X@\x00\x00\x00\x00\x00\x00Y@\x00\x00\x00\x00\x00\x00Y@\x00\x00\x00\x00\x00\x80X@\x00\x00\x00\x00\x00\x80X@\x00\x00\x00\x00\x00\x80X@\x00\x00\x00\x00\x00\x80X@\x00\x00\x00\x00\x00\x00X@\x00\x00\x00\x00\x00\x00X@\x00\x00\x00\x00\x00\x00X@\x00\x00\x00\x00\x00\x80X@\x00\x00\x00\x00\x00\x00X@\x00\x00\x00\x00\x00\x80X@\x00\x00\x00\x00\x00\x00Y@\x00\x00\x00\x00\x00\x00Y@\x00\x00\x00\x00\x00\x00Y@\x00\x00\x00\x00\x00\x00Y@\x00\x00\x00\x00\x00\x00Y@\x00\x00\x00\x00\x00\x00Y@\x00\x00\x00\x00\x00\x00Y@\x00\x00\x00\x00\x00\x00Y@\x00\x00\x00\x00\x00\x00Y@\x00\x00\x00\x00\x00\x80X@\x00\x00\x00\x00\x00\x80X@\x00\x00\x00\x00\x00\x00Y@\x00\x00\x00\x00\x00\x80W@\x00\x00\x00\x00\x00\x80V@\x00\x00\x00\x00\x00\x80V@\x00\x00\x00\x00\x00\x80V@\x00\x00\x00\x00\x00\x80U@\x00\x00\x00\x00\x00\x80U@\x00\x00\x00\x00\x00\x00U@\x00\x00\x00\x00\x00\x80U@\x00\x00\x00\x00\x00\x80U@\x00\x00\x00\x00\x00\x80X@\x00\x00\x00\x00\x00\x80X@\x00\x00\x00\x00\x00\x80W@\x00\x00\x00\x00\x00\x00X@\x00\x00\x00\x00\x00\x80X@\x00\x00\x00\x00\x00\x80X@\x00\x00\x00\x00\x00\x00X@\x00\x00\x00\x00\x00\x00X@\x00\x00\x00\x00\x00\x00V@\x00\x00\x00\x00\x00\x00V@\x00\x00\x00\x00\x00\x80T@\x00\x00\x00\x00\x00\x00S@\x00\x00\x00\x00\x00\x80X@\x00\x00\x00\x00\x00\x80W@\x00\x00\x00\x00\x00\x80V@\x00\x00\x00\x00\x00\x80U@\x00\x00\x00\x00\x00\x80U@\x00\x00\x00\x00\x00\x80S@\x00\x00\x00\x00\x00\x80Q@\x00\x00\x00\x00\x00\x00P@\xff\xff\xff\xff\xff\xffL@\x00\x00\x00\x00\x00\x00K@\x00\x00\x00\x00\x00\x00K@\x00\x00\x00\x00\x00\x00H@\x00\x00\x00\x00\x00\x80X@\x00\x00\x00\x00\x00\x80W@\x00\x00\x00\x00\x00\x00W@\x00\x00\x00\x00\x00\x00U@\x00\x00\x00\x00\x00\x00S@\x00\x00\x00\x00\x00\x00P@\x00\x00\x00\x00\x00\x00I@\x00\x00\x00\x00\x00\x00H@\x00\x00\x00\x00\x00\x00E@\x00\x00\x00\x00\x00\x00C@\x01\x00\x00\x00\x00\x00<@\x00\x00\x00\x00\x00\x006@\x00\x00\x00\x00\x00\x80X@\x00\x00\x00\x00\x00\x80W@\x00\x00\x00\x00\x00\x00W@\x00\x00\x00\x00\x00\x80V@\x00\x00\x00\x00\x00\x80T@\x00\x00\x00\x00\x00\x00Q@\x00\x00\x00\x00\x00\x00O@\x00\x00\x00\x00\x00\x00F@\x00\x00\x00\x00\x00\x00C@\x01\x00\x00\x00\x00\x00<@\x00\x00\x00\x00\x00\x006@\x00\x00\x00\x00\x00\x002@\x00\x00\x00\x00\x00\x80X@\x00\x00\x00\x00\x00\x80W@\x00\x00\x00\x00\x00\x80U@\x00\x00\x00\x00\x00\x00U@\x00\x00\x00\x00\x00\x00S@\x00\x00\x00\x00\x00\x00N@\x00\x00\x00\x00\x00\x00J@\x00\x00\x00\x00\x00\x00F@\x00\x00\x00\x00\x00\x00@@\x00\x00\x00\x00\x00\x006@\x01\x00\x00\x00\x00\x00,@\x00\x00\x00\x00\x00\x00 @\x00\x00\x00\x00\x00\x80X@\x00\x00\x00\x00\x00\x80W@\x00\x00\x00\x00\x00\x80U@\x00\x00\x00\x00\x00\x80R@\xff\xff\xff\xff\xff\xffL@\x00\x00\x00\x00\x00\x00F@\x00\x00\x00\x00\x00\x00B@\x00\x00\x00\x00\x00\x008@\x00\x00\x00\x00\x00\x000@\x00\x00\x00\x00\x00\x00 @\x00\x00\x00\x00\x00\x00\x18@\x00\x00\x00\x00\x00\x00\x00@\x00\x00\x00\x00\x00\x80X@\x00\x00\x00\x00\x00\x80W@\x00\x00\x00\x00\x00\x00T@\x00\x00\x00\x00\x00\x00P@\x00\x00\x00\x00\x00\x00F@\x00\x00\x00\x00\x00\x00>@\x00\x00\x00\x00\x00\x00(@\x00\x00\x00\x00\x00\x00\x10@\x00\x00\x00\x00\x00\x00\x00\x00\x00\x00\x00\x00\x00\x00\x00\x00\x00\x00\x00\x00\x00\x00\x00\x00\x00\x00\x00\x00\x00\x00\x00\x00\x00\x00\x00\x00\x00\x80X@\x00\x00\x00\x00\x00\x00U@\x00\x00\x00\x00\x00\x00N@\x00\x00\x00\x00\x00\x00A@\x00\x00\x00\x00\x00\x00$@\x00\x00\x00\x00\x00\x00\x00\x00\x00\x00\x00\x00\x00\x00\x00\x00\x00\x00\x00\x00\x00\x00\x00\x00\x00\x00\x00\x00\x00\x00\x00\x00\x00\x00\x00\x00\x00\x00\x00\x00\x00\x00\x00\x00\x00\x00\x00\x00\x00\x00\x00\x00\x00\x00\x00\x00\x00\x00\x00\x00\x00\x80X@\x00\x00\x00\x00\x00\x80U@\x00\x00\x00\x00\x00\x00Q@\x00\x00\x00\x00\x00\x00D@\x01\x00\x00\x00\x00\x00,@\x00\x00\x00\x00\x00\x00\x00@\x00\x00\x00\x00\x00\x00\x00\x00\x00\x00\x00\x00\x00\x00\x00\x00\x00\x00\x00\x00\x00\x00\x00\x00\x00\x00\x00\x00\x00\x00\x00\x00\x00\x00\x00\x00\x00\x00\x00\x00\x00\x00\x00\x00\x00\x00\x00\x00\x00\x00\x00\x00\x00\x80X@\x00\x00\x00\x00\x00\x80W@\x00\x00\x00\x00\x00\x00T@\x00\x00\x00\x00\x00\x00Q@\x00\x00\x00\x00\x00\x00I@\x00\x00\x00\x00\x00\x00A@\x00\x00\x00\x00\x00\x00(@\x00\x00\x00\x00\x00\x00\x00\x00\x00\x00\x00\x00\x00\x00\x00\x00\x00\x00\x00\x00\x00\x00\x00\x00\x00\x00\x00\x00\x00\x00\x00\x00\x00\x00\x00\x00\x00\x00\x00\x00\x00\x00\x00\x00\x00\x00Y@\x00\x00\x00\x00\x00\x00Y@\x00\x00\x00\x00\x00\x80X@\x00\x00\x00\x00\x00\x80X@\x00\x00\x00\x00\x00\x80X@\x00\x00\x00\x00\x00\x80X@\x00\x00\x00\x00\x00\x80X@\x00\x00\x00\x00\x00\x80X@\x00\x00\x00\x00\x00\x80X@\x00\x00\x00\x00\x00\x80X@\x00\x00\x00\x00\x00\x80X@\x00\x00\x00\x00\x00\x80X@\x00\x00\x00\x00\x00\x00Y@\x00\x00\x00\x00\x00\x00X@\x00\x00\x00\x00\x00\x00X@\x00\x00\x00\x00\x00\x00X@\x00\x00\x00\x00\x00\x00X@\x00\x00\x00\x00\x00\x00X@\x00\x00\x00\x00\x00\x00W@\x00\x00\x00\x00\x00\x00W@\x00\x00\x00\x00\x00\x80W@\x00\x00\x00\x00\x00\x80W@\x00\x00\x00\x00\x00\x80W@\x00\x00\x00\x00\x00\x80W@\x00\x00\x00\x00\x00\x00Y@\x00\x00\x00\x00\x00\x00X@\x00\x00\x00\x00\x00\x80W@\x00\x00\x00\x00\x00\x80W@\x00\x00\x00\x00\x00\x00W@\x00\x00\x00\x00\x00\x00V@\x00\x00\x00\x00\x00\x80T@\x00\x00\x00\x00\x00\x00T@\x00\x00\x00\x00\x00\x00T@\x00\x00\x00\x00\x00\x00S@\x00\x00\x00\x00\x00\x00S@\x00\x00\x00\x00\x00\x00S@\x00\x00\x00\x00\x00\x00Y@\x00\x00\x00\x00\x00\x80X@\x00\x00\x00\x00\x00\x80W@\x00\x00\x00\x00\x00\x00U@\x00\x00\x00\x00\x00\x00U@\x00\x00\x00\x00\x00\x00U@\x00\x00\x00\x00\x00\x00U@\x00\x00\x00\x00\x00\x00U@\x00\x00\x00\x00\x00\x00U@\x00\x00\x00\x00\x00\x80T@\x00\x00\x00\x00\x00\x00T@\x00\x00\x00\x00\x00\x80T@\x00\x00\x00\x00\x00\x00Y@\x00\x00\x00\x00\x00\x80W@\x00\x00\x00\x00\x00\x80V@\x00\x00\x00\x00\x00\x80V@\x00\x00\x00\x00\x00\x80W@\x00\x00\x00\x00\x00\x00X@\x00\x00\x00\x00\x00\x00Y@\x00\x00\x00\x00\x00\x00Y@\x00\x00\x00\x00\x00\x00Y@\x00\x00\x00\x00\x00\x00Y@\x00\x00\x00\x00\x00\x00Y@\x00\x00\x00\x00\x00\x00Y@\x00\x00\x00\x00\x00\x00Y@\x00\x00\x00\x00\x00\x80W@\x00\x00\x00\x00\x00\x00V@\x00\x00\x00\x00\x00\x00T@\x00\x00\x00\x00\x00\x80S@\x00\x00\x00\x00\x00\x00R@\x00\x00\x00\x00\x00\x80P@\x00\x00\x00\x00\x00\x00P@\x01\x00\x00\x00\x00\x00L@\x00\x00\x00\x00\x00\x00K@\x00\x00\x00\x00\x00\x00I@\x00\x00\x00\x00\x00\x00H@\x00\x00\x00\x00\x00\x00Y@\x00\x00\x00\x00\x00\x00W@\x00\x00\x00\x00\x00\x00T@\x00\x00\x00\x00\x00\x80P@\x00\x00\x00\x00\x00\x00P@\x01\x00\x00\x00\x00\x00L@\x00\x00\x00\x00\x00\x00I@\x00\x00\x00\x00\x00\x00H@\x00\x00\x00\x00\x00\x00E@\x00\x00\x00\x00\x00\x00C@\x00\x00\x00\x00\x00\x00B@\x00\x00\x00\x00\x00\x00@@\x00\x00\x00\x00\x00\x00Y@\x00\x00\x00\x00\x00\x00W@\x00\x00\x00\x00\x00\x00S@\x00\x00\x00\x00\x00\x00P@\x00\x00\x00\x00\x00\x00H@\x00\x00\x00\x00\x00\x00A@\x00\x00\x00\x00\x00\x006@\x00\x00\x00\x00\x00\x00(@\x00\x00\x00\x00\x00\x00\x10@\x00\x00\x00\x00\x00\x00\x00@\x00\x00\x00\x00\x00\x00\x00\x00\x00\x00\x00\x00\x00\x00\x00\x00\x00\x00\x00\x00\x00\x00Y@\x00\x00\x00\x00\x00\x00X@\x00\x00\x00\x00\x00\x80S@\x00\x00\x00\x00\x00\x00P@\x00\x00\x00\x00\x00\x00H@\x00\x00\x00\x00\x00\x002@\x00\x00\x00\x00\x00\x00\x10@\x00\x00\x00\x00\x00\x00\x00\x00\x00\x00\x00\x00\x00\x00\x00\x00\x00\x00\x00\x00\x00\x00\x00\x00\x00\x00\x00\x00\x00\x00\x00\x00\x00\x00\x00\x00\x00\x00\x00\x00\x00\x00\x00\x00\x00\x00Y@\x00\x00\x00\x00\x00\x80V@\x00\x00\x00\x00\x00\x80P@\x00\x00\x00\x00\x00\x00C@\x00\x00\x00\x00\x00\x00$@\x00\x00\x00\x00\x00\x00\x00\x00\x00\x00\x00\x00\x00\x00\x00\x00\x00\x00\x00\x00\x00\x00\x00\x00\x00\x00\x00\x00\x00\x00\x00\x00\x00\x00\x00\x00\x00\x00\x00\x00\x00\x00\x00\x00\x00\x00\x00\x00\x00\x00\x00\x00\x00\x00\x00\x00\x00\x00\x00\x00\x00\x00Y@\x00\x00\x00\x00\x00\x00T@\x00\x00\x00\x00\x00\x00J@\x00\x00\x00\x00\x00\x00$@\x00\x00\x00\x00\x00\x00\x00\x00\x00\x00\x00\x00\x00\x00\x00\x00\x00\x00\x00\x00\x00\x00\x00\x00\x00\x00\x00\x00\x00\x00\x00\x00\x00\x00\x00\x00\x00\x00\x00\x00\x00\x00\x00\x00\x00\x00\x00\x00\x00\x00\x00\x00\x00\x00\x00\x00\x00\x00\x00\x00\x00\x00\x00\x00\x00\x00\x00\x00\x00\x00Y@\x00\x00\x00\x00\x00\x80V@\x00\x00\x00\x00\x00\x80Q@\x00\x00\x00\x00\x00\x00H@\x01\x00\x00\x00\x00\x00,@\x00\x00\x00\x00\x00\x00\x00@\x00\x00\x00\x00\x00\x00\x00\x00\x00\x00\x00\x00\x00\x00\x00\x00\x00\x00\x00\x00\x00\x00\x00\x00\x00\x00\x00\x00\x00\x00\x00\x00\x00\x00\x00\x00\x00\x00\x00\x00\x00\x00\x00\x00\x00\x00\x00\x00\x00\x00\x00\x00\x00\x00Y@\x00\x00\x00\x00\x00\x80W@\x00\x00\x00\x00\x00\x80U@\x00\x00\x00\x00\x00\x00R@\x01\x00\x00\x00\x00\x00L@\x00\x00\x00\x00\x00\x00G@\x00\x00\x00\x00\x00\x00:@\x00\x00\x00\x00\x00\x00$@\x00\x00\x00\x00\x00\x00\x00@\x00\x00\x00\x00\x00\x00\x00\x00\x00\x00\x00\x00\x00\x00\x00\x00\x00\x00\x00\x00\x00\x00\x00\x00\x00\x00\x00\x00\x00\x00X@\x00\x00\x00\x00\x00\x00X@\x00\x00\x00\x00\x00\x80W@\x00\x00\x00\x00\x00\x00V@\x00\x00\x00\x00\x00\x80U@\x00\x00\x00\x00\x00\x80T@\x00\x00\x00\x00\x00\x80T@\x00\x00\x00\x00\x00\x80T@\x00\x00\x00\x00\x00\x80T@\x00\x00\x00\x00\x00\x00U@\x00\x00\x00\x00\x00\x80V@\x00\x00\x00\x00\x00\x00V@\x00\x00\x00\x00\x00\x00X@\x00\x00\x00\x00\x00\x00X@\x00\x00\x00\x00\x00\x80W@\x00\x00\x00\x00\x00\x80W@\x00\x00\x00\x00\x00\x00W@\x00\x00\x00\x00\x00\x80V@\x00\x00\x00\x00\x00\x80U@\x00\x00\x00\x00\x00\x80U@\x00\x00\x00\x00\x00\x00U@\x00\x00\x00\x00\x00\x00U@\x00\x00\x00\x00\x00\x80T@\x00\x00\x00\x00\x00\x80T@\x00\x00\x00\x00\x00\x00X@\x00\x00\x00\x00\x00\x00X@\x00\x00\x00\x00\x00\x00W@\x00\x00\x00\x00\x00\x80V@\x00\x00\x00\x00\x00\x00U@\x00\x00\x00\x00\x00\x80U@\x00\x00\x00\x00\x00\x00W@\x00\x00\x00\x00\x00\x80W@\x00\x00\x00\x00\x00\x00X@\x00\x00\x00\x00\x00\x00Y@\x00\x00\x00\x00\x00\x00Y@\x00\x00\x00\x00\x00\x00Y@\x00\x00\x00\x00\x00\x00X@\x00\x00\x00\x00\x00\x00X@\x00\x00\x00\x00\x00\x80W@\x00\x00\x00\x00\x00\x80W@\x00\x00\x00\x00\x00\x00V@\x00\x00\x00\x00\x00\x00V@\x00\x00\x00\x00\x00\x00U@\x00\x00\x00\x00\x00\x00U@\x00\x00\x00\x00\x00\x00V@\x00\x00\x00\x00\x00\x80V@\x00\x00\x00\x00\x00\x80W@\x00\x00\x00\x00\x00\x00X@\x00\x00\x00\x00\x00\x00X@\x00\x00\x00\x00\x00\x00W@\x00\x00\x00\x00\x00\x80S@\x00\x00\x00\x00\x00\x80T@\x00\x00\x00\x00\x00\x00V@\x00\x00\x00\x00\x00\x80X@\x00\x00\x00\x00\x00\x00Y@\x00\x00\x00\x00\x00\x00Y@\x00\x00\x00\x00\x00\x00Y@\x00\x00\x00\x00\x00\x00Y@\x00\x00\x00\x00\x00\x00Y@\x00\x00\x00\x00\x00\x00Y@\x00\x00\x00\x00\x00\x00X@\x00\x00\x00\x00\x00\x80V@\x00\x00\x00\x00\x00\x00S@\x00\x00\x00\x00\x00\x00R@\x00\x00\x00\x00\x00\x00Q@\x00\x00\x00\x00\x00\x80P@\x00\x00\x00\x00\x00\x80P@\x00\x00\x00\x00\x00\x80Q@\x00\x00\x00\x00\x00\x00S@\x00\x00\x00\x00\x00\x00S@\x00\x00\x00\x00\x00\x00S@\x00\x00\x00\x00\x00\x80S@\x00\x00\x00\x00\x00\x00X@\x00\x00\x00\x00\x00\x00X@\x00\x00\x00\x00\x00\x80V@\x00\x00\x00\x00\x00\x80T@\x00\x00\x00\x00\x00\x00S@\x00\x00\x00\x00\x00\x80P@\x00\x00\x00\x00\x00\x00O@\xff\xff\xff\xff\xff\xffL@\x00\x00\x00\x00\x00\x00K@\x00\x00\x00\x00\x00\x00K@\x00\x00\x00\x00\x00\x00J@\x00\x00\x00\x00\x00\x00I@\x00\x00\x00\x00\x00\x00X@\x00\x00\x00\x00\x00\x80V@\x00\x00\x00\x00\x00\x80S@\x00\x00\x00\x00\x00\x80P@\x01\x00\x00\x00\x00\x00L@\x00\x00\x00\x00\x00\x00J@\x00\x00\x00\x00\x00\x00H@\x00\x00\x00\x00\x00\x00E@\x00\x00\x00\x00\x00\x00D@\x00\x00\x00\x00\x00\x00C@\x00\x00\x00\x00\x00\x00B@\x00\x00\x00\x00\x00\x00@@\x00\x00\x00\x00\x00\x00X@\x00\x00\x00\x00\x00\x80V@\x00\x00\x00\x00\x00\x00Q@\x01\x00\x00\x00\x00\x00L@\x00\x00\x00\x00\x00\x00G@\x00\x00\x00\x00\x00\x00@@\x00\x00\x00\x00\x00\x008@\x00\x00\x00\x00\x00\x006@\x00\x00\x00\x00\x00\x000@\x01\x00\x00\x00\x00\x00,@\x00\x00\x00\x00\x00\x00(@\x00\x00\x00\x00\x00\x00(@\x00\x00\x00\x00\x00\x00X@\x00\x00\x00\x00\x00\x80V@\x00\x00\x00\x00\x00\x00R@\x00\x00\x00\x00\x00\x00N@\x00\x00\x00\x00\x00\x00I@\x00\x00\x00\x00\x00\x00E@\x00\x00\x00\x00\x00\x00A@\x00\x00\x00\x00\x00\x00@@\x01\x00\x00\x00\x00\x00<@\x00\x00\x00\x00\x00\x008@\x00\x00\x00\x00\x00\x004@\x01\x00\x00\x00\x00\x00,@\x00\x00\x00\x00\x00\x00X@\x00\x00\x00\x00\x00\x00N@\x00\x00\x00\x00\x00\x00C@\x00\x00\x00\x00\x00\x000@\x00\x00\x00\x00\x00\x00\x10@\x00\x00\x00\x00\x00\x00\x00@\x00\x00\x00\x00\x00\x00\x00\x00\x00\x00\x00\x00\x00\x00\x00\x00\x00\x00\x00\x00\x00\x00\x00\x00\x00\x00\x00\x00\x00\x00\x00\x00\x00\x00\x00\x00\x00\x00\x00\x00\x00\x00\x00\x00\x00\x00\x00\x00\x00\x00\x00\x00\x00\x00X@\x00\x00\x00\x00\x00\x00Q@\x00\x00\x00\x00\x00\x00H@\x00\x00\x00\x00\x00\x00@@\x00\x00\x00\x00\x00\x004@\x00\x00\x00\x00\x00\x00\x10@\x00\x00\x00\x00\x00\x00\x00@\x00\x00\x00\x00\x00\x00\x00\x00\x00\x00\x00\x00\x00\x00\x00\x00\x00\x00\x00\x00\x00\x00\x00\x00\x00\x00\x00\x00\x00\x00\x00\x00\x00\x00\x00\x00\x00\x00\x00\x00\x00\x00\x00\x00\x00\x00X@\x00\x00\x00\x00\x00\x80U@\x00\x00\x00\x00\x00\x00Q@\x00\x00\x00\x00\x00\x00K@\x00\x00\x00\x00\x00\x00C@\x01\x00\x00\x00\x00\x00<@\x00\x00\x00\x00\x00\x002@\x00\x00\x00\x00\x00\x00 @\x00\x00\x00\x00\x00\x00\x00@\x00\x00\x00\x00\x00\x00\x00\x00\x00\x00\x00\x00\x00\x00\x00\x00\x00\x00\x00\x00\x00\x00\x00\x00\x00\x00\x00\x00\x00\x00Y@\x00\x00\x00\x00\x00\x00Y@\x00\x00\x00\x00\x00\x00Y@\x00\x00\x00\x00\x00\x00Y@\x00\x00\x00\x00\x00\x00Y@\x00\x00\x00\x00\x00\x00Y@\x00\x00\x00\x00\x00\x00Y@\x00\x00\x00\x00\x00\x00Y@\x00\x00\x00\x00\x00\x00Y@\x00\x00\x00\x00\x00\x00Y@\x00\x00\x00\x00\x00\x00Y@\x00\x00\x00\x00\x00\x00Y@\x00\x00\x00\x00\x00\x00Y@\x00\x00\x00\x00\x00\x80X@\x00\x00\x00\x00\x00\x80X@\x00\x00\x00\x00\x00\x80X@\x00\x00\x00\x00\x00\x80X@\x00\x00\x00\x00\x00\x00Y@\x00\x00\x00\x00\x00\x00Y@\x00\x00\x00\x00\x00\x00Y@\x00\x00\x00\x00\x00\x00Y@\x00\x00\x00\x00\x00\x00Y@\x00\x00\x00\x00\x00\x00Y@\x00\x00\x00\x00\x00\x00Y@\x00\x00\x00\x00\x00\x00Y@\x00\x00\x00\x00\x00\x80X@\x00\x00\x00\x00\x00\x80X@\x00\x00\x00\x00\x00\x00X@\x00\x00\x00\x00\x00\x80W@\x00\x00\x00\x00\x00\x00W@\x00\x00\x00\x00\x00\x80V@\x00\x00\x00\x00\x00\x00V@\x00\x00\x00\x00\x00\x80V@\x00\x00\x00\x00\x00\x00R@\x00\x00\x00\x00\x00\x80P@\x00\x00\x00\x00\x00\x00K@\x00\x00\x00\x00\x00\x00Y@\x00\x00\x00\x00\x00\x80X@\x00\x00\x00\x00\x00\x80X@\x00\x00\x00\x00\x00\x80V@\x00\x00\x00\x00\x00\x80U@\x00\x00\x00\x00\x00\x80S@\x00\x00\x00\x00\x00\x00P@\x01\x00\x00\x00\x00\x00L@\x00\x00\x00\x00\x00\x00D@\x00\x00\x00\x00\x00\x00@@\x00\x00\x00\x00\x00\x00>@\x01\x00\x00\x00\x00\x00<@\x00\x00\x00\x00\x00\x00Y@\x00\x00\x00\x00\x00\x80X@\x00\x00\x00\x00\x00\x80U@\x00\x00\x00\x00\x00\x00N@\x00\x00\x00\x00\x00\x00:@\x01\x00\x00\x00\x00\x00,@\x00\x00\x00\x00\x00\x00\x10@\x00\x00\x00\x00\x00\x00\x00@\x00\x00\x00\x00\x00\x00\x00\x00\x00\x00\x00\x00\x00\x00\x00\x00\x00\x00\x00\x00\x00\x00\x00\x00\x00\x00\x00\x00\x00\x00\x00\x00\x00\x00\x00\x00\x00\x00Y@\x00\x00\x00\x00\x00\x80X@\x00\x00\x00\x00\x00\x00W@\x00\x00\x00\x00\x00\x80S@\x00\x00\x00\x00\x00\x00O@\x00\x00\x00\x00\x00\x00F@\x00\x00\x00\x00\x00\x00@@\x00\x00\x00\x00\x00\x008@\x00\x00\x00\x00\x00\x002@\x00\x00\x00\x00\x00\x00 @\x00\x00\x00\x00\x00\x00\x18@\x00\x00\x00\x00\x00\x00\x10@\x00\x00\x00\x00\x00\x00Y@\x00\x00\x00\x00\x00\x80X@\x00\x00\x00\x00\x00\x00T@\xff\xff\xff\xff\xff\xffL@\x00\x00\x00\x00\x00\x00@@\x00\x00\x00\x00\x00\x00:@\x00\x00\x00\x00\x00\x006@\x00\x00\x00\x00\x00\x00(@\x00\x00\x00\x00\x00\x00$@\x00\x00\x00\x00\x00\x00$@\x00\x00\x00\x00\x00\x00$@\x00\x00\x00\x00\x00\x00$@\x00\x00\x00\x00\x00\x00Y@\x00\x00\x00\x00\x00\x00X@\x00\x00\x00\x00\x00\x00S@\x00\x00\x00\x00\x00\x00I@\x00\x00\x00\x00\x00\x00@@\x00\x00\x00\x00\x00\x000@\x00\x00\x00\x00\x00\x00(@\x00\x00\x00\x00\x00\x00\x18@\x00\x00\x00\x00\x00\x00\x00@\x00\x00\x00\x00\x00\x00\x00@\x00\x00\x00\x00\x00\x00\x00@\x00\x00\x00\x00\x00\x00\x00@\x00\x00\x00\x00\x00\x00Y@\x00\x00\x00\x00\x00\x00W@\x00\x00\x00\x00\x00\x00N@\x00\x00\x00\x00\x00\x00@@\x00\x00\x00\x00\x00\x000@\x00\x00\x00\x00\x00\x00 @\x00\x00\x00\x00\x00\x00\x00@\x00\x00\x00\x00\x00\x00\x00\x00\x00\x00\x00\x00\x00\x00\x00\x00\x00\x00\x00\x00\x00\x00\x00\x00\x00\x00\x00\x00\x00\x00\x00\x00\x00\x00\x00\x00\x00\x00\x00\x00\x00\x00\x00\x00\x00\x00Y@\x00\x00\x00\x00\x00\x00X@\x00\x00\x00\x00\x00\x00Q@\x00\x00\x00\x00\x00\x00I@\x00\x00\x00\x00\x00\x004@\x00\x00\x00\x00\x00\x00$@\x00\x00\x00\x00\x00\x00\x00@\x00\x00\x00\x00\x00\x00\x00@\x00\x00\x00\x00\x00\x00\x00\x00\x00\x00\x00\x00\x00\x00\x00\x00\x00\x00\x00\x00\x00\x00\x00\x00\x00\x00\x00\x00\x00\x00\x00\x00\x00\x00\x00\x00\x00\x00Y@\x00\x00\x00\x00\x00\x00T@\x00\x00\x00\x00\x00\x00C@\x00\x00\x00\x00\x00\x00\x18@\x00\x00\x00\x00\x00\x00\x00@\x00\x00\x00\x00\x00\x00\x00\x00\x00\x00\x00\x00\x00\x00\x00\x00\x00\x00\x00\x00\x00\x00\x00\x00\x00\x00\x00\x00\x00\x00\x00\x00\x00\x00\x00\x00\x00\x00\x00\x00\x00\x00\x00\x00\x00\x00\x00\x00\x00\x00\x00\x00\x00\x00\x00\x00\x00\x00\x00\x00\x00\x00Y@\x00\x00\x00\x00\x00\x80W@\x00\x00\x00\x00\x00\x80R@\x00\x00\x00\x00\x00\x00H@\x00\x00\x00\x00\x00\x008@\x00\x00\x00\x00\x00\x00$@\x00\x00\x00\x00\x00\x00\x18@\x00\x00\x00\x00\x00\x00\x10@\x00\x00\x00\x00\x00\x00\x10@\x00\x00\x00\x00\x00\x00\x00\x00\x00\x00\x00\x00\x00\x00\x00\x00\x00\x00\x00\x00\x00\x00\x00\x00\x00\x00\x00\x00\x00\x00Y@\x00\x00\x00\x00\x00\x80W@\x00\x00\x00\x00\x00\x80R@\x00\x00\x00\x00\x00\x00I@\x00\x00\x00\x00\x00\x00(@\x00\x00\x00\x00\x00\x00 @\x00\x00\x00\x00\x00\x00\x00\x00\x00\x00\x00\x00\x00\x00\x00\x00\x00\x00\x00\x00\x00\x00\x00\x00\x00\x00\x00\x00\x00\x00\x00\x00\x00\x00\x00\x00\x00\x00\x00\x00\x00\x00\x00\x00\x00\x00\x00\x00\x00\x00\x00\x00\x00\x80P@\x00\x00\x00\x00\x00\x00R@\x00\x00\x00\x00\x00\x80S@\x00\x00\x00\x00\x00\x00R@\x00\x00\x00\x00\x00\x00S@\x00\x00\x00\x00\x00\x80Q@\x00\x00\x00\x00\x00\x00O@\x00\x00\x00\x00\x00\x00J@\x00\x00\x00\x00\x00\x00F@\x00\x00\x00\x00\x00\x00E@\x00\x00\x00\x00\x00\x00D@\x00\x00\x00\x00\x00\x00E@\x00\x00\x00\x00\x00\x80P@\x00\x00\x00\x00\x00\x00Q@\x00\x00\x00\x00\x00\x80R@\x00\x00\x00\x00\x00\x00S@\x00\x00\x00\x00\x00\x00S@\x00\x00\x00\x00\x00\x00U@\x00\x00\x00\x00\x00\x80U@\x00\x00\x00\x00\x00\x00U@\x00\x00\x00\x00\x00\x00U@\x00\x00\x00\x00\x00\x80U@\x00\x00\x00\x00\x00\x80U@\x00\x00\x00\x00\x00\x00U@\x00\x00\x00\x00\x00\x80P@\x00\x00\x00\x00\x00\x00Q@\x00\x00\x00\x00\x00\x80Q@\x00\x00\x00\x00\x00\x00S@\x00\x00\x00\x00\x00\x00T@\x00\x00\x00\x00\x00\x00U@\x00\x00\x00\x00\x00\x80U@\x00\x00\x00\x00\x00\x80U@\x00\x00\x00\x00\x00\x00V@\x00\x00\x00\x00\x00\x00V@\x00\x00\x00\x00\x00\x80U@\x00\x00\x00\x00\x00\x00V@\x00\x00\x00\x00\x00\x80P@\x00\x00\x00\x00\x00\x00O@\x00\x00\x00\x00\x00\x00N@\xff\xff\xff\xff\xff\xffL@\xff\xff\xff\xff\xff\xffL@\x00\x00\x00\x00\x00\x00K@\xff\xff\xff\xff\xff\xffL@\xff\xff\xff\xff\xff\xffL@\x00\x00\x00\x00\x00\x00P@\x00\x00\x00\x00\x00\x00P@\x00\x00\x00\x00\x00\x80P@\x00\x00\x00\x00\x00\x00R@\x00\x00\x00\x00\x00\x80P@\x00\x00\x00\x00\x00\x00P@\x00\x00\x00\x00\x00\x80P@\x00\x00\x00\x00\x00\x80S@\x00\x00\x00\x00\x00\x00V@\x00\x00\x00\x00\x00\x00X@\x00\x00\x00\x00\x00\x80X@\x00\x00\x00\x00\x00\x80X@\x00\x00\x00\x00\x00\x00Y@\x00\x00\x00\x00\x00\x00Y@\x00\x00\x00\x00\x00\x00Y@\x00\x00\x00\x00\x00\x00Y@\x00\x00\x00\x00\x00\x80P@\x00\x00\x00\x00\x00\x00P@\x00\x00\x00\x00\x00\x00P@\x00\x00\x00\x00\x00\x00Q@\x00\x00\x00\x00\x00\x80Q@\x00\x00\x00\x00\x00\x00S@\x00\x00\x00\x00\x00\x00T@\x00\x00\x00\x00\x00\x80U@\x00\x00\x00\x00\x00\x80U@\x00\x00\x00\x00\x00\x80V@\x00\x00\x00\x00\x00\x80W@\x00\x00\x00\x00\x00\x80W@\x00\x00\x00\x00\x00\x80P@\x00\x00\x00\x00\x00\x00S@\x00\x00\x00\x00\x00\x00U@\x00\x00\x00\x00\x00\x00V@\x00\x00\x00\x00\x00\x00X@\x00\x00\x00\x00\x00\x80W@\x00\x00\x00\x00\x00\x80W@\x00\x00\x00\x00\x00\x00X@\x00\x00\x00\x00\x00\x80X@\x00\x00\x00\x00\x00\x80X@\x00\x00\x00\x00\x00\x80X@\x00\x00\x00\x00\x00\x00X@\x00\x00\x00\x00\x00\x80P@\x00\x00\x00\x00\x00\x80R@\x00\x00\x00\x00\x00\x80T@\x00\x00\x00\x00\x00\x00U@\x00\x00\x00\x00\x00\x00W@\x00\x00\x00\x00\x00\x00X@\x00\x00\x00\x00\x00\x80X@\x00\x00\x00\x00\x00\x80X@\x00\x00\x00\x00\x00\x00Y@\x00\x00\x00\x00\x00\x00Y@\x00\x00\x00\x00\x00\x00Y@\x00\x00\x00\x00\x00\x00Y@\x00\x00\x00\x00\x00\x80P@\x00\x00\x00\x00\x00\x80R@\x00\x00\x00\x00\x00\x80S@\x00\x00\x00\x00\x00\x80U@\x00\x00\x00\x00\x00\x00V@\x00\x00\x00\x00\x00\x00X@\x00\x00\x00\x00\x00\x00X@\x00\x00\x00\x00\x00\x80W@\x00\x00\x00\x00\x00\x00X@\x00\x00\x00\x00\x00\x80X@\x00\x00\x00\x00\x00\x80X@\x00\x00\x00\x00\x00\x80X@\x00\x00\x00\x00\x00\x80P@\x00\x00\x00\x00\x00\x80S@\x00\x00\x00\x00\x00\x80U@\x00\x00\x00\x00\x00\x80W@\x00\x00\x00\x00\x00\x00X@\x00\x00\x00\x00\x00\x80X@\x00\x00\x00\x00\x00\x00Y@\x00\x00\x00\x00\x00\x00Y@\x00\x00\x00\x00\x00\x00Y@\x00\x00\x00\x00\x00\x00Y@\x00\x00\x00\x00\x00\x00Y@\x00\x00\x00\x00\x00\x00Y@\x00\x00\x00\x00\x00\x80P@\x00\x00\x00\x00\x00\x80T@\x00\x00\x00\x00\x00\x00W@\x00\x00\x00\x00\x00\x80X@\x00\x00\x00\x00\x00\x00Y@\x00\x00\x00\x00\x00\x00Y@\x00\x00\x00\x00\x00\x00Y@\x00\x00\x00\x00\x00\x00Y@\x00\x00\x00\x00\x00\x00Y@\x00\x00\x00\x00\x00\x00Y@\x00\x00\x00\x00\x00\x00Y@\x00\x00\x00\x00\x00\x00Y@\x00\x00\x00\x00\x00\x80P@\x00\x00\x00\x00\x00\x00T@\x00\x00\x00\x00\x00\x80V@\x00\x00\x00\x00\x00\x00W@\x00\x00\x00\x00\x00\x00X@\x00\x00\x00\x00\x00\x00Y@\x00\x00\x00\x00\x00\x00Y@\x00\x00\x00\x00\x00\x00Y@\x00\x00\x00\x00\x00\x00Y@\x00\x00\x00\x00\x00\x00Y@\x00\x00\x00\x00\x00\x00Y@\x00\x00\x00\x00\x00\x00Y@\x00\x00\x00\x00\x00\x80P@\x00\x00\x00\x00\x00\x80R@\x00\x00\x00\x00\x00\x00V@\x00\x00\x00\x00\x00\x00W@\x00\x00\x00\x00\x00\x80W@\x00\x00\x00\x00\x00\x80W@\x00\x00\x00\x00\x00\x80X@\x00\x00\x00\x00\x00\x80X@\x00\x00\x00\x00\x00\x00Y@\x00\x00\x00\x00\x00\x00Y@\x00\x00\x00\x00\x00\x00Y@\x00\x00\x00\x00\x00\x00Y@'
p20
tp21
ba.
