# Supplementary material for: How biological attention mechanisms improve task performance in a large-scale visual system model
Source: eLife journal article supplement (doi:10.7554/elife.38105), 2018-10-01
Supplement: supp [file elife-38105-supp-v1.zip › elife_poa_e38105_Figure_5_source_data_2.txt]

(lp0
cnumpy.core.multiarray
_reconstruct
p1
(cnumpy
ndarray
p2
(I0
tp3
S'b'
p4
tp5
Rp6
(I1
(I2
I13
I8
I6
tp7
cnumpy
dtype
p8
(S'f8'
p9
I0
I1
tp10
Rp11
(I3
S'<'
p12
NNNI-1
I-1
I0
tp13
bI00
S'A\x9e\x12\xe4)A\xee?\xd6\xbea\xed\x1b\xd6\xee?k\xdf\xb0\xf6\rk\xef?k\xdf\xb0\xf6\rk\xef?\xaeG\xe1z\x14\xae\xef?\x17]t\xd1E\x17\xed?\xed\x1b\xd6\xbea\xed\xab?\x9e\x12\xe4)A\x9e\xb2?\x9e\x12\xe4)A\x9e\xa2?{\x14\xaeG\xe1z\x84?{\x14\xaeG\xe1z\x84?{\x14\xaeG\xe1z\x84?\xed\x1b\xd6\xbea\xed\xbb?\x9e\x12\xe4)A\x9e\xa2?\x9e\x12\xe4)A\x9e\x92?{\x14\xaeG\xe1z\x84?{\x14\xaeG\xe1z\x84?{\x14\xaeG\xe1z\x84?J\x90\xa7\x04yJ\xc0?\x9a\x99\x99\x99\x99\x99\xc9?F\x17]t\xd1E\xd7?\x9e\x12\xe4)A\x9e\xe2?\xed\x1b\xd6\xbea\xed\xeb?A\x9e\x12\xe4)A\xee?F\x17]t\xd1E\xb7?\x9a\x99\x99\x99\x99\x99\xc9?t\xd1E\x17]t\xd1?\xc8S\x82<%\xc8\xd3?pX\xfb\x86\xb5o\xd8?A\x9e\x12\xe4)A\xce?\x9e\x12\xe4)A\x9e\xc2?J\x90\xa7\x04yJ\xd0?\xc3\xda7\xac}\xc3\xda?\xf2\x94 O\t\xf2\xd4?\xed\x1b\xd6\xbea\xed\xbb?\x9e\x12\xe4)A\x9e\xa2?\x9e\x12\xe4)A\x9e\xb2?\x9e\x12\xe4)A\x9e\xb2?\x9e\x12\xe4)A\x9e\xb2?\x9e\x12\xe4)A\x9e\xb2?\x9e\x12\xe4)A\x9e\x92?{\x14\xaeG\xe1z\x84?\xc8S\x82<%\xc8\xe3?F\x17]t\xd1E\xe7?\xf2\x94 O\t\xf2\xe4?\x87\xb5oX\xfb\x86\xe5?\x82<%\xc8S\x82\xec?F\x17]t\xd1E\xe7?A\x9e\x12\xe4)A\xee?\xd6\xbea\xed\x1b\xd6\xee?k\xdf\xb0\xf6\rk\xef?\xd6\xbea\xed\x1b\xd6\xee?X\xfb\x86\xb5oX\xeb?]t\xd1E\x17]\xe4?\xed\x1b\xd6\xbea\xed\xab?\xed\x1b\xd6\xbea\xed\xab?{\x14\xaeG\xe1z\x84?{\x14\xaeG\xe1z\x84?{\x14\xaeG\xe1z\x84?{\x14\xaeG\xe1z\x84?\xed\x1b\xd6\xbea\xed\xbb?\x9e\x12\xe4)A\x9e\xa2?\x9e\x12\xe4)A\x9e\x92?{\x14\xaeG\xe1z\x84?{\x14\xaeG\xe1z\x84?{\x14\xaeG\xe1z\x84?J\x90\xa7\x04yJ\xc0?\x9a\x99\x99\x99\x99\x99\xc9?\x17]t\xd1E\x17\xdd?k\xdf\xb0\xf6\rk\xef?k\xdf\xb0\xf6\rk\xef?\xd6\xbea\xed\x1b\xd6\xee?F\x17]t\xd1E\xb7?J\x90\xa7\x04yJ\xd0?A\x9e\x12\xe4)A\xde?\xf2\x94 O\t\xf2\xe4?\xc3\xda7\xac}\xc3\xea?]t\xd1E\x17]\xe4?\x9e\x12\xe4)A\x9e\xc2?\xc8S\x82<%\xc8\xd3?\x17]t\xd1E\x17\xdd?\xf2\x94 O\t\xf2\xd4?\xed\x1b\xd6\xbea\xed\xbb?\xed\x1b\xd6\xbea\xed\xab?\x9e\x12\xe4)A\x9e\xb2?\x9e\x12\xe4)A\x9e\xb2?\x9e\x12\xe4)A\x9e\x92?\x9e\x12\xe4)A\x9e\x92?{\x14\xaeG\xe1z\x84?{\x14\xaeG\xe1z\x84?\xc8S\x82<%\xc8\xe3?F\x17]t\xd1E\xe7?\xf2\x94 O\t\xf2\xe4?k\xdf\xb0\xf6\rk\xdf?/\xba\xe8\xa2\x8b.\xea?\x17]t\xd1E\x17\xdd?A\x9e\x12\xe4)A\xee?\xd6\xbea\xed\x1b\xd6\xee?\x9a\x99\x99\x99\x99\x99\xe9?\xdb7\xac}\xc3\xda\xe7?/\xba\xe8\xa2\x8b.\xea?/\xba\xe8\xa2\x8b.\xea?\xed\x1b\xd6\xbea\xed\xab?\xed\x1b\xd6\xbea\xed\xab?\x9e\x12\xe4)A\x9e\x92?{\x14\xaeG\xe1z\x84?{\x14\xaeG\xe1z\x84?{\x14\xaeG\xe1z\x84?\xed\x1b\xd6\xbea\xed\xbb?\x9e\x12\xe4)A\x9e\xb2?\x9e\x12\xe4)A\x9e\x92?{\x14\xaeG\xe1z\x84?{\x14\xaeG\xe1z\x84?{\x14\xaeG\xe1z\x84?J\x90\xa7\x04yJ\xc0?\xed\x1b\xd6\xbea\xed\xcb?]t\xd1E\x17]\xe4?k\xdf\xb0\xf6\rk\xef?\xaeG\xe1z\x14\xae\xef?\xaeG\xe1z\x14\xae\xef?F\x17]t\xd1E\xb7?J\x90\xa7\x04yJ\xd0?333333\xe3?\x9a\x99\x99\x99\x99\x99\xe9?\x17]t\xd1E\x17\xed?\xac}\xc3\xda7\xac\xed?\x9e\x12\xe4)A\x9e\xc2?\xc8S\x82<%\xc8\xd3?\xc3\xda7\xac}\xc3\xda?\x9a\x99\x99\x99\x99\x99\xc9?J\x90\xa7\x04yJ\xc0?F\x17]t\xd1E\xb7?\x9e\x12\xe4)A\x9e\xb2?\x9e\x12\xe4)A\x9e\xb2?\x9e\x12\xe4)A\x9e\xb2?{\x14\xaeG\xe1z\x84?{\x14\xaeG\xe1z\x84?{\x14\xaeG\xe1z\x84?\xc8S\x82<%\xc8\xe3?\x1c\xd6\xbea\xed\x1b\xe6?k\xdf\xb0\xf6\rk\xdf?\xed\x1b\xd6\xbea\xed\xdb?\xc8S\x82<%\xc8\xd3?F\x17]t\xd1E\xd7?A\x9e\x12\xe4)A\xee?\xd6\xbea\xed\x1b\xd6\xee?\x82<%\xc8S\x82\xec?A\x9e\x12\xe4)A\xde?\xed\x1b\xd6\xbea\xed\xcb?\xed\x1b\xd6\xbea\xed\xbb?\xed\x1b\xd6\xbea\xed\xab?\x9e\x12\xe4)A\x9e\x92?{\x14\xaeG\xe1z\x84?{\x14\xaeG\xe1z\x84?{\x14\xaeG\xe1z\x84?{\x14\xaeG\xe1z\x84?\xed\x1b\xd6\xbea\xed\xbb?\xed\x1b\xd6\xbea\xed\xab?\x9e\x12\xe4)A\x9e\xa2?\xed\x1b\xd6\xbea\xed\xcb?F\x17]t\xd1E\xd7?{\x14\xaeG\xe1z\x84?J\x90\xa7\x04yJ\xc0?\xf2\x94 O\t\xf2\xd4?pX\xfb\x86\xb5o\xe8?\xac}\xc3\xda7\xac\xed?\xac}\xc3\xda7\xac\xed?k\xdf\xb0\xf6\rk\xef?F\x17]t\xd1E\xb7?\xc3\xda7\xac}\xc3\xda?\xac}\xc3\xda7\xac\xed?\xaeG\xe1z\x14\xae\xef?\xaeG\xe1z\x14\xae\xef?\xaeG\xe1z\x14\xae\xef?\x9e\x12\xe4)A\x9e\xc2?\xf2\x94 O\t\xf2\xd4?J\x90\xa7\x04yJ\xe0?t\xd1E\x17]t\xe1?J\x90\xa7\x04yJ\xe0?A\x9e\x12\xe4)A\xde?\x9e\x12\xe4)A\x9e\xb2?\x9e\x12\xe4)A\x9e\x92?{\x14\xaeG\xe1z\x84?{\x14\xaeG\xe1z\x84?{\x14\xaeG\xe1z\x84?{\x14\xaeG\xe1z\x84?\xc8S\x82<%\xc8\xe3?pX\xfb\x86\xb5o\xe8?A\x9e\x12\xe4)A\xee?k\xdf\xb0\xf6\rk\xef?\xac}\xc3\xda7\xac\xed?\xc3\xda7\xac}\xc3\xea?A\x9e\x12\xe4)A\xee?\xd6\xbea\xed\x1b\xd6\xee?\xed\x1b\xd6\xbea\xed\xeb?F\x17]t\xd1E\xe7?\xc8S\x82<%\xc8\xd3?\x9a\x99\x99\x99\x99\x99\xc9?\xed\x1b\xd6\xbea\xed\xab?\x9e\x12\xe4)A\x9e\x92?{\x14\xaeG\xe1z\x84?{\x14\xaeG\xe1z\x84?{\x14\xaeG\xe1z\x84?{\x14\xaeG\xe1z\x84?\xed\x1b\xd6\xbea\xed\xbb?F\x17]t\xd1E\xb7?\xed\x1b\xd6\xbea\xed\xbb?t\xd1E\x17]t\xd1?\xed\x1b\xd6\xbea\xed\xdb?t\xd1E\x17]t\xd1?J\x90\xa7\x04yJ\xc0?\xdf\xb0\xf6\rk\xdf\xe0?k\xdf\xb0\xf6\rk\xef?k\xdf\xb0\xf6\rk\xef?\xaeG\xe1z\x14\xae\xef?\xaeG\xe1z\x14\xae\xef?F\x17]t\xd1E\xb7?\x9e\x12\xe4)A\x9e\xe2?\xac}\xc3\xda7\xac\xed?\xaeG\xe1z\x14\xae\xef?\xaeG\xe1z\x14\xae\xef?\xac}\xc3\xda7\xac\xed?\x9e\x12\xe4)A\x9e\xc2?\xf2\x94 O\t\xf2\xd4?\x9e\x12\xe4)A\x9e\xd2?A\x9e\x12\xe4)A\xce?F\x17]t\xd1E\xc7?\xc8S\x82<%\xc8\xd3?\x9e\x12\xe4)A\x9e\xb2?\x9e\x12\xe4)A\x9e\xa2?{\x14\xaeG\xe1z\x84?{\x14\xaeG\xe1z\x84?{\x14\xaeG\xe1z\x84?{\x14\xaeG\xe1z\x84?\xc8S\x82<%\xc8\xe3?\xb1\xf6\rk\xdf\xb0\xe6?\x17]t\xd1E\x17\xed?\xaeG\xe1z\x14\xae\xef?\xaeG\xe1z\x14\xae\xef?\xaeG\xe1z\x14\xae\xef?A\x9e\x12\xe4)A\xee?k\xdf\xb0\xf6\rk\xef?\xed\x1b\xd6\xbea\xed\xeb?\x9e\x12\xe4)A\x9e\xe2?\x9e\x12\xe4)A\x9e\xd2?\xc8S\x82<%\xc8\xd3?\xed\x1b\xd6\xbea\xed\xab?\xed\x1b\xd6\xbea\xed\xab?{\x14\xaeG\xe1z\x84?{\x14\xaeG\xe1z\x84?{\x14\xaeG\xe1z\x84?{\x14\xaeG\xe1z\x84?\xed\x1b\xd6\xbea\xed\xbb?F\x17]t\xd1E\xb7?\x9e\x12\xe4)A\x9e\x92?\xed\x1b\xd6\xbea\xed\xab?\x9e\x12\xe4)A\x9e\xc2?F\x17]t\xd1E\xc7?J\x90\xa7\x04yJ\xc0?333333\xe3?k\xdf\xb0\xf6\rk\xef?k\xdf\xb0\xf6\rk\xef?\xac}\xc3\xda7\xac\xed?\xdb7\xac}\xc3\xda\xe7?F\x17]t\xd1E\xb7?k\xdf\xb0\xf6\rk\xdf?\x82<%\xc8S\x82\xec?\xd6\xbea\xed\x1b\xd6\xee?\xaeG\xe1z\x14\xae\xef?\xac}\xc3\xda7\xac\xed?\x9e\x12\xe4)A\x9e\xc2?\xf2\x94 O\t\xf2\xd4?F\x17]t\xd1E\xd7?\x9e\x12\xe4)A\x9e\xd2?\x9a\x99\x99\x99\x99\x99\xc9?\xed\x1b\xd6\xbea\xed\xbb?\x9e\x12\xe4)A\x9e\xb2?\xed\x1b\xd6\xbea\xed\xab?\x9e\x12\xe4)A\x9e\xa2?{\x14\xaeG\xe1z\x84?{\x14\xaeG\xe1z\x84?{\x14\xaeG\xe1z\x84?\xc8S\x82<%\xc8\xe3?pX\xfb\x86\xb5o\xe8?\x82<%\xc8S\x82\xec?A\x9e\x12\xe4)A\xee?\xaeG\xe1z\x14\xae\xef?\xaeG\xe1z\x14\xae\xef?A\x9e\x12\xe4)A\xee?k\xdf\xb0\xf6\rk\xef?\x17]t\xd1E\x17\xed?\xc8S\x82<%\xc8\xe3?\xed\x1b\xd6\xbea\xed\xdb?J\x90\xa7\x04yJ\xe0?\xed\x1b\xd6\xbea\xed\xab?\xed\x1b\xd6\xbea\xed\xab?{\x14\xaeG\xe1z\x84?{\x14\xaeG\xe1z\x84?{\x14\xaeG\xe1z\x84?\x9e\x12\xe4)A\x9e\x92?\xed\x1b\xd6\xbea\xed\xbb?F\x17]t\xd1E\xb7?\xed\x1b\xd6\xbea\xed\xbb?\x9e\x12\xe4)A\x9e\xb2?\x9e\x12\xe4)A\x9e\x92?\x9e\x12\xe4)A\x9e\x92?J\x90\xa7\x04yJ\xc0?A\x9e\x12\xe4)A\xde?\xd6\xbea\xed\x1b\xd6\xee?\xaeG\xe1z\x14\xae\xef?\xed\x1b\xd6\xbea\xed\xeb?\x87\xb5oX\xfb\x86\xe5?F\x17]t\xd1E\xb7?\x1c\xd6\xbea\xed\x1b\xd6?\xb1\xf6\rk\xdf\xb0\xe6?pX\xfb\x86\xb5o\xe8?\x17]t\xd1E\x17\xdd?\x9e\x12\xe4)A\x9e\xd2?\x9e\x12\xe4)A\x9e\xc2?\xc8S\x82<%\xc8\xd3?J\x90\xa7\x04yJ\xd0?\xc8S\x82<%\xc8\xd3?A\x9e\x12\xe4)A\xde?\xed\x1b\xd6\xbea\xed\xdb?\x9e\x12\xe4)A\x9e\xb2?\xed\x1b\xd6\xbea\xed\xab?\x9e\x12\xe4)A\x9e\xa2?{\x14\xaeG\xe1z\x84?{\x14\xaeG\xe1z\x84?{\x14\xaeG\xe1z\x84?\xc8S\x82<%\xc8\xe3?\xdb7\xac}\xc3\xda\xe7?/\xba\xe8\xa2\x8b.\xea?/\xba\xe8\xa2\x8b.\xea?\xc3\xda7\xac}\xc3\xea?\x9a\x99\x99\x99\x99\x99\xe9?A\x9e\x12\xe4)A\xee?k\xdf\xb0\xf6\rk\xef?k\xdf\xb0\xf6\rk\xef?k\xdf\xb0\xf6\rk\xef?\xd6\xbea\xed\x1b\xd6\xee?k\xdf\xb0\xf6\rk\xef?\xed\x1b\xd6\xbea\xed\xab?F\x17]t\xd1E\xb7?A\x9e\x12\xe4)A\xce?F\x17]t\xd1E\xd7?J\x90\xa7\x04yJ\xd0?\xf2\x94 O\t\xf2\xc4?\xed\x1b\xd6\xbea\xed\xbb?\xed\x1b\xd6\xbea\xed\xbb?\xed\x1b\xd6\xbea\xed\xbb?J\x90\xa7\x04yJ\xc0?\x1c\xd6\xbea\xed\x1b\xd6?J\x90\xa7\x04yJ\xe0?J\x90\xa7\x04yJ\xc0?t\xd1E\x17]t\xe1?k\xdf\xb0\xf6\rk\xef?\xaeG\xe1z\x14\xae\xef?\xaeG\xe1z\x14\xae\xef?\xaeG\xe1z\x14\xae\xef?F\x17]t\xd1E\xb7?pX\xfb\x86\xb5o\xd8?X\xfb\x86\xb5oX\xeb?k\xdf\xb0\xf6\rk\xef?A\x9e\x12\xe4)A\xee?\x87\xb5oX\xfb\x86\xe5?\x9e\x12\xe4)A\x9e\xc2?\xf2\x94 O\t\xf2\xc4?\x9a\x99\x99\x99\x99\x99\xc9?F\x17]t\xd1E\xc7?F\x17]t\xd1E\xb7?\x9e\x12\xe4)A\x9e\x92?\x9e\x12\xe4)A\x9e\xb2?\x9e\x12\xe4)A\x9e\xa2?{\x14\xaeG\xe1z\x84?\x9e\x12\xe4)A\x9e\x92?\x9e\x12\xe4)A\x9e\x92?{\x14\xaeG\xe1z\x84?\xc8S\x82<%\xc8\xe3?\x05yJ\x90\xa7\x04\xe9?\xac}\xc3\xda7\xac\xed?\xaeG\xe1z\x14\xae\xef?\xaeG\xe1z\x14\xae\xef?\xaeG\xe1z\x14\xae\xef?A\x9e\x12\xe4)A\xee?k\xdf\xb0\xf6\rk\xef?\xaeG\xe1z\x14\xae\xef?\xaeG\xe1z\x14\xae\xef?\xaeG\xe1z\x14\xae\xef?\xaeG\xe1z\x14\xae\xef?\xed\x1b\xd6\xbea\xed\xab?\x9e\x12\xe4)A\x9e\xc2?\x1c\xd6\xbea\xed\x1b\xd6?\xdb7\xac}\xc3\xda\xe7?k\xdf\xb0\xf6\rk\xef?\xd6\xbea\xed\x1b\xd6\xee?\xed\x1b\xd6\xbea\xed\xbb?F\x17]t\xd1E\xb7?F\x17]t\xd1E\xb7?F\x17]t\xd1E\xb7?\x9e\x12\xe4)A\x9e\xb2?\xed\x1b\xd6\xbea\xed\xab?J\x90\xa7\x04yJ\xc0?\x87\xb5oX\xfb\x86\xe5?k\xdf\xb0\xf6\rk\xef?\xaeG\xe1z\x14\xae\xef?\xaeG\xe1z\x14\xae\xef?\xd6\xbea\xed\x1b\xd6\xee?F\x17]t\xd1E\xb7?]t\xd1E\x17]\xe4?\xaeG\xe1z\x14\xae\xef?\xaeG\xe1z\x14\xae\xef?\xaeG\xe1z\x14\xae\xef?\xaeG\xe1z\x14\xae\xef?\x9e\x12\xe4)A\x9e\xc2?\xf2\x94 O\t\xf2\xd4?A\x9e\x12\xe4)A\xde?\x87\xb5oX\xfb\x86\xe5?\xdb7\xac}\xc3\xda\xe7?\x87\xb5oX\xfb\x86\xe5?\x9e\x12\xe4)A\x9e\xb2?F\x17]t\xd1E\xb7?F\x17]t\xd1E\xb7?\xf2\x94 O\t\xf2\xc4?\x9a\x99\x99\x99\x99\x99\xc9?F\x17]t\xd1E\xb7?\xc8S\x82<%\xc8\xe3?/\xba\xe8\xa2\x8b.\xea?\xd6\xbea\xed\x1b\xd6\xee?\xaeG\xe1z\x14\xae\xef?\xaeG\xe1z\x14\xae\xef?\xed\x1b\xd6\xbea\xed\xeb?A\x9e\x12\xe4)A\xee?k\xdf\xb0\xf6\rk\xef?\xaeG\xe1z\x14\xae\xef?\xaeG\xe1z\x14\xae\xef?\xaeG\xe1z\x14\xae\xef?\xaeG\xe1z\x14\xae\xef?\xed\x1b\xd6\xbea\xed\xab?F\x17]t\xd1E\xc7?\xdf\xb0\xf6\rk\xdf\xe0?F\x17]t\xd1E\xe7?\x17]t\xd1E\x17\xed?\x17]t\xd1E\x17\xed?\xed\x1b\xd6\xbea\xed\xbb?F\x17]t\xd1E\xb7?F\x17]t\xd1E\xb7?\x9e\x12\xe4)A\x9e\xc2?\xf2\x94 O\t\xf2\xc4?J\x90\xa7\x04yJ\xd0?J\x90\xa7\x04yJ\xc0?\t\xf2\x94 O\t\xe2?\xd6\xbea\xed\x1b\xd6\xee?\xaeG\xe1z\x14\xae\xef?\xaeG\xe1z\x14\xae\xef?\xaeG\xe1z\x14\xae\xef?F\x17]t\xd1E\xb7?\xc8S\x82<%\xc8\xe3?\xaeG\xe1z\x14\xae\xef?\xaeG\xe1z\x14\xae\xef?\xaeG\xe1z\x14\xae\xef?\xaeG\xe1z\x14\xae\xef?\x9e\x12\xe4)A\x9e\xc2?\xf2\x94 O\t\xf2\xd4?t\xd1E\x17]t\xe1?]t\xd1E\x17]\xe4?\x1c\xd6\xbea\xed\x1b\xe6?F\x17]t\xd1E\xe7?\x9e\x12\xe4)A\x9e\xb2?\x9e\x12\xe4)A\x9e\xc2?J\x90\xa7\x04yJ\xd0?\xf2\x94 O\t\xf2\xd4?F\x17]t\xd1E\xd7?t\xd1E\x17]t\xd1?\xc8S\x82<%\xc8\xe3?\x17]t\xd1E\x17\xed?\xaeG\xe1z\x14\xae\xef?\xaeG\xe1z\x14\xae\xef?\xaeG\xe1z\x14\xae\xef?k\xdf\xb0\xf6\rk\xef?A\x9e\x12\xe4)A\xee?k\xdf\xb0\xf6\rk\xef?\xaeG\xe1z\x14\xae\xef?\xaeG\xe1z\x14\xae\xef?\xaeG\xe1z\x14\xae\xef?\xaeG\xe1z\x14\xae\xef?\xed\x1b\xd6\xbea\xed\xab?J\x90\xa7\x04yJ\xc0?\xc8S\x82<%\xc8\xd3?\xed\x1b\xd6\xbea\xed\xdb?333333\xe3?X\xfb\x86\xb5oX\xeb?\xed\x1b\xd6\xbea\xed\xbb?\x9e\x12\xe4)A\x9e\xb2?\xed\x1b\xd6\xbea\xed\xab?\x9e\x12\xe4)A\x9e\xb2?\xed\x1b\xd6\xbea\xed\xbb?\xed\x1b\xd6\xbea\xed\xbb?J\x90\xa7\x04yJ\xc0?A\x9e\x12\xe4)A\xde?\xd6\xbea\xed\x1b\xd6\xee?k\xdf\xb0\xf6\rk\xef?k\xdf\xb0\xf6\rk\xef?k\xdf\xb0\xf6\rk\xef?F\x17]t\xd1E\xb7?F\x17]t\xd1E\xe7?\xaeG\xe1z\x14\xae\xef?\xaeG\xe1z\x14\xae\xef?\xaeG\xe1z\x14\xae\xef?\xaeG\xe1z\x14\xae\xef?\x9e\x12\xe4)A\x9e\xc2?\x17]t\xd1E\x17\xdd?\x87\xb5oX\xfb\x86\xe5?\xc3\xda7\xac}\xc3\xea?\x82<%\xc8S\x82\xec?\xc3\xda7\xac}\xc3\xea?\x9e\x12\xe4)A\x9e\xb2?F\x17]t\xd1E\xc7?\xed\x1b\xd6\xbea\xed\xdb?\x9e\x12\xe4)A\x9e\xe2?\xc8S\x82<%\xc8\xe3?333333\xe3?\xc8S\x82<%\xc8\xe3?\xc3\xda7\xac}\xc3\xea?\xaeG\xe1z\x14\xae\xef?\xaeG\xe1z\x14\xae\xef?\xaeG\xe1z\x14\xae\xef?\xaeG\xe1z\x14\xae\xef?A\x9e\x12\xe4)A\xee?k\xdf\xb0\xf6\rk\xef?\xaeG\xe1z\x14\xae\xef?\xaeG\xe1z\x14\xae\xef?\xaeG\xe1z\x14\xae\xef?\xaeG\xe1z\x14\xae\xef?\xed\x1b\xd6\xbea\xed\xab?\x9e\x12\xe4)A\x9e\xd2?\x9a\x99\x99\x99\x99\x99\xe9?k\xdf\xb0\xf6\rk\xef?\xaeG\xe1z\x14\xae\xef?\xaeG\xe1z\x14\xae\xef?\xed\x1b\xd6\xbea\xed\xbb?\xed\x1b\xd6\xbea\xed\xbb?F\x17]t\xd1E\xc7?\xc8S\x82<%\xc8\xd3?J\x90\xa7\x04yJ\xe0?pX\xfb\x86\xb5o\xe8?J\x90\xa7\x04yJ\xc0?t\xd1E\x17]t\xe1?\xd6\xbea\xed\x1b\xd6\xee?\xaeG\xe1z\x14\xae\xef?\xaeG\xe1z\x14\xae\xef?pX\xfb\x86\xb5o\xe8?F\x17]t\xd1E\xb7?\xb1\xf6\rk\xdf\xb0\xe6?\xaeG\xe1z\x14\xae\xef?\xaeG\xe1z\x14\xae\xef?\xaeG\xe1z\x14\xae\xef?J\x90\xa7\x04yJ\xd0?\x9e\x12\xe4)A\x9e\xc2?A\x9e\x12\xe4)A\xde?\x1c\xd6\xbea\xed\x1b\xe6?\xed\x1b\xd6\xbea\xed\xeb?A\x9e\x12\xe4)A\xee?k\xdf\xb0\xf6\rk\xef?\x9e\x12\xe4)A\x9e\xb2?J\x90\xa7\x04yJ\xd0?333333\xe3?\x9a\x99\x99\x99\x99\x99\xe9?\xac}\xc3\xda7\xac\xed?\xaeG\xe1z\x14\xae\xef?\xc8S\x82<%\xc8\xe3?\xed\x1b\xd6\xbea\xed\xeb?\xaeG\xe1z\x14\xae\xef?\xaeG\xe1z\x14\xae\xef?\xaeG\xe1z\x14\xae\xef?pX\xfb\x86\xb5o\xe8?A\x9e\x12\xe4)A\xee?k\xdf\xb0\xf6\rk\xef?\xaeG\xe1z\x14\xae\xef?\xaeG\xe1z\x14\xae\xef?\xaeG\xe1z\x14\xae\xef?\xaeG\xe1z\x14\xae\xef?\xed\x1b\xd6\xbea\xed\xab?\x9a\x99\x99\x99\x99\x99\xc9?\xdf\xb0\xf6\rk\xdf\xe0?\xac}\xc3\xda7\xac\xed?\xac}\xc3\xda7\xac\xed?\xac}\xc3\xda7\xac\xed?\xed\x1b\xd6\xbea\xed\xbb?\xed\x1b\xd6\xbea\xed\xbb?J\x90\xa7\x04yJ\xd0?\x9a\x99\x99\x99\x99\x99\xd9?\xdf\xb0\xf6\rk\xdf\xe0?J\x90\xa7\x04yJ\xe0?J\x90\xa7\x04yJ\xc0?\x17]t\xd1E\x17\xdd?\x82<%\xc8S\x82\xec?\xaeG\xe1z\x14\xae\xef?\xaeG\xe1z\x14\xae\xef?\xaeG\xe1z\x14\xae\xef?F\x17]t\xd1E\xb7?\x9e\x12\xe4)A\x9e\xe2?k\xdf\xb0\xf6\rk\xef?\xaeG\xe1z\x14\xae\xef?\xaeG\xe1z\x14\xae\xef?\xaeG\xe1z\x14\xae\xef?\x9e\x12\xe4)A\x9e\xc2?k\xdf\xb0\xf6\rk\xdf?\x9a\x99\x99\x99\x99\x99\xe9?\xd6\xbea\xed\x1b\xd6\xee?k\xdf\xb0\xf6\rk\xef?k\xdf\xb0\xf6\rk\xef?\x9e\x12\xe4)A\x9e\xb2?J\x90\xa7\x04yJ\xd0?333333\xe3?\xed\x1b\xd6\xbea\xed\xeb?k\xdf\xb0\xf6\rk\xef?\xaeG\xe1z\x14\xae\xef?\xc8S\x82<%\xc8\xe3?X\xfb\x86\xb5oX\xeb?\xaeG\xe1z\x14\xae\xef?\xaeG\xe1z\x14\xae\xef?\xaeG\xe1z\x14\xae\xef?\xaeG\xe1z\x14\xae\xef?\xf2\x94 O\t\xf2\xd4?\x1c\xd6\xbea\xed\x1b\xd6?\x9a\x99\x99\x99\x99\x99\xd9?\xf2\x94 O\t\xf2\xd4?\xec\x1b\xd6\xbea\xed\xcb?L\x90\xa7\x04yJ\xc0?{\x14\xaeG\xe1z\x84?{\x14\xaeG\xe1z\x84?{\x14\xaeG\xe1z\x84?{\x14\xaeG\xe1z\x84?{\x14\xaeG\xe1z\x84?{\x14\xaeG\xe1z\x84?{\x14\xaeG\xe1z\x84?{\x14\xaeG\xe1z\x84?{\x14\xaeG\xe1z\x84?{\x14\xaeG\xe1z\x84?{\x14\xaeG\xe1z\x84?{\x14\xaeG\xe1z\x84?\xa0\x12\xe4)A\x9e\x92?\xf0\x1b\xd6\xbea\xed\xab?\xf0\x1b\xd6\xbea\xed\xab?\xa0\x12\xe4)A\x9e\xa2?\xa0\x12\xe4)A\x9e\xb2?\xa0\x12\xe4)A\x9e\xb2?{\x14\xaeG\xe1z\x84?{\x14\xaeG\xe1z\x84?{\x14\xaeG\xe1z\x84?{\x14\xaeG\xe1z\x84?{\x14\xaeG\xe1z\x84?{\x14\xaeG\xe1z\x84?\xa0\x12\xe4)A\x9e\xa2?\xf0\x1b\xd6\xbea\xed\xab?\xa0\x12\xe4)A\x9e\xb2?\xa0\x12\xe4)A\x9e\x92?{\x14\xaeG\xe1z\x84?{\x14\xaeG\xe1z\x84?{\x14\xaeG\xe1z\x84?{\x14\xaeG\xe1z\x84?{\x14\xaeG\xe1z\x84?{\x14\xaeG\xe1z\x84?{\x14\xaeG\xe1z\x84?{\x14\xaeG\xe1z\x84?\x98\x99\x99\x99\x99\x99\xc9?D\x17]t\xd1E\xc7?L\x90\xa7\x04yJ\xc0?\xa0\x12\xe4)A\x9e\xc2?\x98\x99\x99\x99\x99\x99\xc9?\xa0\x12\xe4)A\x9e\xb2?\xf2\x94 O\t\xf2\xd4?\xf2\x94 O\t\xf2\xd4?\xf2\x94 O\t\xf2\xd4?D\x17]t\xd1E\xc7?L\x90\xa7\x04yJ\xc0?\xa0\x12\xe4)A\x9e\xb2?{\x14\xaeG\xe1z\x84?{\x14\xaeG\xe1z\x84?{\x14\xaeG\xe1z\x84?{\x14\xaeG\xe1z\x84?{\x14\xaeG\xe1z\x84?{\x14\xaeG\xe1z\x84?{\x14\xaeG\xe1z\x84?{\x14\xaeG\xe1z\x84?{\x14\xaeG\xe1z\x84?{\x14\xaeG\xe1z\x84?{\x14\xaeG\xe1z\x84?{\x14\xaeG\xe1z\x84?\xa0\x12\xe4)A\x9e\x92?\xf0\x1b\xd6\xbea\xed\xab?\xf0\x1b\xd6\xbea\xed\xab?@\x9e\x12\xe4)A\xce?\xec\x1b\xd6\xbea\xed\xcb?D\x17]t\xd1E\xc7?{\x14\xaeG\xe1z\x84?{\x14\xaeG\xe1z\x84?\xa0\x12\xe4)A\x9e\xa2?\xa0\x12\xe4)A\x9e\xb2?H\x17]t\xd1E\xb7?\xa0\x12\xe4)A\x9e\xb2?\xa0\x12\xe4)A\x9e\xa2?H\x17]t\xd1E\xb7?L\x90\xa7\x04yJ\xc0?\xa0\x12\xe4)A\x9e\x92?{\x14\xaeG\xe1z\x84?{\x14\xaeG\xe1z\x84?{\x14\xaeG\xe1z\x84?{\x14\xaeG\xe1z\x84?{\x14\xaeG\xe1z\x84?{\x14\xaeG\xe1z\x84?{\x14\xaeG\xe1z\x84?{\x14\xaeG\xe1z\x84?\x98\x99\x99\x99\x99\x99\xc9?\xa0\x12\xe4)A\x9e\xc2?H\x17]t\xd1E\xb7?H\x17]t\xd1E\xb7?\xa0\x12\xe4)A\x9e\xa2?\xa0\x12\xe4)A\x9e\x92?\xf2\x94 O\t\xf2\xd4?F\x17]t\xd1E\xd7?L\x90\xa7\x04yJ\xc0?\xf0\x1b\xd6\xbea\xed\xbb?L\x90\xa7\x04yJ\xc0?L\x90\xa7\x04yJ\xc0?{\x14\xaeG\xe1z\x84?{\x14\xaeG\xe1z\x84?{\x14\xaeG\xe1z\x84?{\x14\xaeG\xe1z\x84?{\x14\xaeG\xe1z\x84?{\x14\xaeG\xe1z\x84?{\x14\xaeG\xe1z\x84?{\x14\xaeG\xe1z\x84?{\x14\xaeG\xe1z\x84?{\x14\xaeG\xe1z\x84?{\x14\xaeG\xe1z\x84?{\x14\xaeG\xe1z\x84?\xa0\x12\xe4)A\x9e\x92?\xf0\x1b\xd6\xbea\xed\xab?\x98\x99\x99\x99\x99\x99\xc9?\x98\x99\x99\x99\x99\x99\xc9?J\x90\xa7\x04yJ\xd0?\xc8S\x82<%\xc8\xd3?{\x14\xaeG\xe1z\x84?{\x14\xaeG\xe1z\x84?\xa0\x12\xe4)A\x9e\x92?\xa0\x12\xe4)A\x9e\xa2?\xf0\x1b\xd6\xbea\xed\xab?\xf0\x1b\xd6\xbea\xed\xab?\xa0\x12\xe4)A\x9e\xa2?\xf0\x1b\xd6\xbea\xed\xab?\xa0\x12\xe4)A\x9e\x92?{\x14\xaeG\xe1z\x84?{\x14\xaeG\xe1z\x84?{\x14\xaeG\xe1z\x84?{\x14\xaeG\xe1z\x84?\xa0\x12\xe4)A\x9e\x92?\xa0\x12\xe4)A\x9e\x92?{\x14\xaeG\xe1z\x84?{\x14\xaeG\xe1z\x84?{\x14\xaeG\xe1z\x84?\x98\x99\x99\x99\x99\x99\xc9?\x98\x99\x99\x99\x99\x99\xc9?\xa0\x12\xe4)A\x9e\x92?{\x14\xaeG\xe1z\x84?{\x14\xaeG\xe1z\x84?{\x14\xaeG\xe1z\x84?\xf2\x94 O\t\xf2\xd4?\xc4\xda7\xac}\xc3\xda?\x9a\x99\x99\x99\x99\x99\xd9?H\x17]t\xd1E\xb7?{\x14\xaeG\xe1z\x84?{\x14\xaeG\xe1z\x84?{\x14\xaeG\xe1z\x84?{\x14\xaeG\xe1z\x84?{\x14\xaeG\xe1z\x84?{\x14\xaeG\xe1z\x84?{\x14\xaeG\xe1z\x84?{\x14\xaeG\xe1z\x84?{\x14\xaeG\xe1z\x84?{\x14\xaeG\xe1z\x84?{\x14\xaeG\xe1z\x84?\xa0\x12\xe4)A\x9e\x92?\xa0\x12\xe4)A\x9e\x92?{\x14\xaeG\xe1z\x84?\xa0\x12\xe4)A\x9e\x92?\xf0\x1b\xd6\xbea\xed\xab?\xa0\x12\xe4)A\x9e\xc2?\x1c\xd6\xbea\xed\x1b\xd6?\x18]t\xd1E\x17\xdd?\x1c\xd6\xbea\xed\x1b\xe6?{\x14\xaeG\xe1z\x84?\xa0\x12\xe4)A\x9e\x92?\xf4\x94 O\t\xf2\xc4?@\x9e\x12\xe4)A\xce?J\x90\xa7\x04yJ\xd0?t\xd1E\x17]t\xd1?\xa0\x12\xe4)A\x9e\xa2?H\x17]t\xd1E\xb7?H\x17]t\xd1E\xb7?\xf0\x1b\xd6\xbea\xed\xab?\xa0\x12\xe4)A\x9e\xa2?\xa0\x12\xe4)A\x9e\x92?{\x14\xaeG\xe1z\x84?{\x14\xaeG\xe1z\x84?{\x14\xaeG\xe1z\x84?{\x14\xaeG\xe1z\x84?{\x14\xaeG\xe1z\x84?{\x14\xaeG\xe1z\x84?\x98\x99\x99\x99\x99\x99\xc9?J\x90\xa7\x04yJ\xd0?\xc8S\x82<%\xc8\xd3?\xc4\xda7\xac}\xc3\xda?@\x9e\x12\xe4)A\xce?\xa0\x12\xe4)A\x9e\xc2?\xf2\x94 O\t\xf2\xd4?\x9a\x99\x99\x99\x99\x99\xd9?J\x90\xa7\x04yJ\xd0?\x98\x99\x99\x99\x99\x99\xc9?\xa0\x12\xe4)A\x9e\x92?\xa0\x12\xe4)A\x9e\x92?{\x14\xaeG\xe1z\x84?{\x14\xaeG\xe1z\x84?{\x14\xaeG\xe1z\x84?{\x14\xaeG\xe1z\x84?{\x14\xaeG\xe1z\x84?{\x14\xaeG\xe1z\x84?{\x14\xaeG\xe1z\x84?{\x14\xaeG\xe1z\x84?\xa0\x12\xe4)A\x9e\x92?\xa0\x12\xe4)A\x9e\x92?\xf0\x1b\xd6\xbea\xed\xab?\xf0\x1b\xd6\xbea\xed\xab?\xa0\x12\xe4)A\x9e\x92?\xa0\x12\xe4)A\x9e\xb2?J\x90\xa7\x04yJ\xe0?.\xba\xe8\xa2\x8b.\xea?A\x9e\x12\xe4)A\xee?\xd6\xbea\xed\x1b\xd6\xee?{\x14\xaeG\xe1z\x84?\xa0\x12\xe4)A\x9e\x92?D\x17]t\xd1E\xc7?L\x90\xa7\x04yJ\xc0?L\x90\xa7\x04yJ\xc0?L\x90\xa7\x04yJ\xc0?\xa0\x12\xe4)A\x9e\xa2?H\x17]t\xd1E\xb7?\xf0\x1b\xd6\xbea\xed\xab?{\x14\xaeG\xe1z\x84?{\x14\xaeG\xe1z\x84?\xf0\x1b\xd6\xbea\xed\xab?{\x14\xaeG\xe1z\x84?\xa0\x12\xe4)A\x9e\x92?\xa0\x12\xe4)A\x9e\x92?{\x14\xaeG\xe1z\x84?{\x14\xaeG\xe1z\x84?\xa0\x12\xe4)A\x9e\x92?\x98\x99\x99\x99\x99\x99\xc9?\xf4\x94 O\t\xf2\xc4?@\x9e\x12\xe4)A\xce?\xc8S\x82<%\xc8\xd3?pX\xfb\x86\xb5o\xd8?pX\xfb\x86\xb5o\xd8?\xf2\x94 O\t\xf2\xd4?pX\xfb\x86\xb5o\xd8?\xf2\x94 O\t\xf2\xd4?H\x17]t\xd1E\xb7?\xa0\x12\xe4)A\x9e\x92?\xa0\x12\xe4)A\x9e\x92?{\x14\xaeG\xe1z\x84?{\x14\xaeG\xe1z\x84?{\x14\xaeG\xe1z\x84?{\x14\xaeG\xe1z\x84?{\x14\xaeG\xe1z\x84?{\x14\xaeG\xe1z\x84?{\x14\xaeG\xe1z\x84?{\x14\xaeG\xe1z\x84?{\x14\xaeG\xe1z\x84?{\x14\xaeG\xe1z\x84?{\x14\xaeG\xe1z\x84?{\x14\xaeG\xe1z\x84?\xa0\x12\xe4)A\x9e\x92?H\x17]t\xd1E\xb7?B\x9e\x12\xe4)A\xde?.\xba\xe8\xa2\x8b.\xea?X\xfb\x86\xb5oX\xeb?F\x17]t\xd1E\xe7?{\x14\xaeG\xe1z\x84?\xa0\x12\xe4)A\x9e\xa2?\xa0\x12\xe4)A\x9e\xc2?D\x17]t\xd1E\xc7?@\x9e\x12\xe4)A\xce?\xec\x1b\xd6\xbea\xed\xcb?\xa0\x12\xe4)A\x9e\xa2?\xf0\x1b\xd6\xbea\xed\xab?\xa0\x12\xe4)A\x9e\xb2?{\x14\xaeG\xe1z\x84?{\x14\xaeG\xe1z\x84?{\x14\xaeG\xe1z\x84?{\x14\xaeG\xe1z\x84?{\x14\xaeG\xe1z\x84?{\x14\xaeG\xe1z\x84?{\x14\xaeG\xe1z\x84?{\x14\xaeG\xe1z\x84?{\x14\xaeG\xe1z\x84?\x98\x99\x99\x99\x99\x99\xc9?\x98\x99\x99\x99\x99\x99\xc9?\xec\x1b\xd6\xbea\xed\xcb?\x9e\x12\xe4)A\x9e\xd2?\xf2\x94 O\t\xf2\xd4?\x9a\x99\x99\x99\x99\x99\xd9?\xf2\x94 O\t\xf2\xd4?\xc4\xda7\xac}\xc3\xda?\x1c\xd6\xbea\xed\x1b\xd6?\xa0\x12\xe4)A\x9e\xc2?\xa0\x12\xe4)A\x9e\x92?\xa0\x12\xe4)A\x9e\x92?{\x14\xaeG\xe1z\x84?{\x14\xaeG\xe1z\x84?{\x14\xaeG\xe1z\x84?{\x14\xaeG\xe1z\x84?{\x14\xaeG\xe1z\x84?{\x14\xaeG\xe1z\x84?{\x14\xaeG\xe1z\x84?{\x14\xaeG\xe1z\x84?{\x14\xaeG\xe1z\x84?{\x14\xaeG\xe1z\x84?{\x14\xaeG\xe1z\x84?{\x14\xaeG\xe1z\x84?\xa0\x12\xe4)A\x9e\x92?\xf0\x1b\xd6\xbea\xed\xbb?\x1c\xd6\xbea\xed\x1b\xd6?\n\xf2\x94 O\t\xe2?F\x17]t\xd1E\xe7?333333\xe3?{\x14\xaeG\xe1z\x84?{\x14\xaeG\xe1z\x84?H\x17]t\xd1E\xb7?\xf0\x1b\xd6\xbea\xed\xbb?\xa0\x12\xe4)A\x9e\x92?\xa0\x12\xe4)A\x9e\x92?\xa0\x12\xe4)A\x9e\xa2?\xf0\x1b\xd6\xbea\xed\xab?\xa0\x12\xe4)A\x9e\xa2?{\x14\xaeG\xe1z\x84?\xa0\x12\xe4)A\x9e\x92?\xa0\x12\xe4)A\x9e\x92?{\x14\xaeG\xe1z\x84?\xa0\x12\xe4)A\x9e\x92?{\x14\xaeG\xe1z\x84?{\x14\xaeG\xe1z\x84?{\x14\xaeG\xe1z\x84?{\x14\xaeG\xe1z\x84?\x98\x99\x99\x99\x99\x99\xc9?@\x9e\x12\xe4)A\xce?\xf4\x94 O\t\xf2\xc4?D\x17]t\xd1E\xc7?D\x17]t\xd1E\xc7?L\x90\xa7\x04yJ\xc0?\xf2\x94 O\t\xf2\xd4?pX\xfb\x86\xb5o\xd8?F\x17]t\xd1E\xd7?\xc8S\x82<%\xc8\xd3?\xc4\xda7\xac}\xc3\xda?\xf2\x94 O\t\xf2\xd4?{\x14\xaeG\xe1z\x84?{\x14\xaeG\xe1z\x84?{\x14\xaeG\xe1z\x84?\xa0\x12\xe4)A\x9e\x92?\xa0\x12\xe4)A\x9e\xa2?{\x14\xaeG\xe1z\x84?{\x14\xaeG\xe1z\x84?{\x14\xaeG\xe1z\x84?{\x14\xaeG\xe1z\x84?{\x14\xaeG\xe1z\x84?\xa0\x12\xe4)A\x9e\x92?\xa0\x12\xe4)A\x9e\xa2?\xa0\x12\xe4)A\x9e\x92?\xa0\x12\xe4)A\x9e\xb2?\xf2\x94 O\t\xf2\xd4?\xb1\xf6\rk\xdf\xb0\xe6?\xee\x1b\xd6\xbea\xed\xeb?\x9a\x99\x99\x99\x99\x99\xe9?{\x14\xaeG\xe1z\x84?{\x14\xaeG\xe1z\x84?\xf0\x1b\xd6\xbea\xed\xbb?H\x17]t\xd1E\xb7?\xf0\x1b\xd6\xbea\xed\xbb?\xa0\x12\xe4)A\x9e\xa2?\xa0\x12\xe4)A\x9e\xa2?\xf0\x1b\xd6\xbea\xed\xab?\xa0\x12\xe4)A\x9e\x92?{\x14\xaeG\xe1z\x84?\xa0\x12\xe4)A\x9e\xa2?{\x14\xaeG\xe1z\x84?{\x14\xaeG\xe1z\x84?{\x14\xaeG\xe1z\x84?{\x14\xaeG\xe1z\x84?{\x14\xaeG\xe1z\x84?{\x14\xaeG\xe1z\x84?{\x14\xaeG\xe1z\x84?\x98\x99\x99\x99\x99\x99\xc9?D\x17]t\xd1E\xc7?\xf4\x94 O\t\xf2\xc4?L\x90\xa7\x04yJ\xc0?L\x90\xa7\x04yJ\xc0?D\x17]t\xd1E\xc7?\xf2\x94 O\t\xf2\xd4?F\x17]t\xd1E\xd7?F\x17]t\xd1E\xd7?\xf2\x94 O\t\xf2\xd4?\xe0\xb0\xf6\rk\xdf\xe0?\x9e\x12\xe4)A\x9e\xe2?{\x14\xaeG\xe1z\x84?{\x14\xaeG\xe1z\x84?\xa0\x12\xe4)A\x9e\x92?\xf0\x1b\xd6\xbea\xed\xab?\xc8S\x82<%\xc8\xd3?pX\xfb\x86\xb5o\xd8?{\x14\xaeG\xe1z\x84?{\x14\xaeG\xe1z\x84?{\x14\xaeG\xe1z\x84?{\x14\xaeG\xe1z\x84?{\x14\xaeG\xe1z\x84?{\x14\xaeG\xe1z\x84?\xa0\x12\xe4)A\x9e\x92?\xf0\x1b\xd6\xbea\xed\xbb?\xc8S\x82<%\xc8\xd3?J\x90\xa7\x04yJ\xe0?\xee\x1b\xd6\xbea\xed\xdb?F\x17]t\xd1E\xd7?{\x14\xaeG\xe1z\x84?\xa0\x12\xe4)A\x9e\xa2?\xf4\x94 O\t\xf2\xc4?\xec\x1b\xd6\xbea\xed\xcb?\x98\x99\x99\x99\x99\x99\xc9?D\x17]t\xd1E\xc7?\xa0\x12\xe4)A\x9e\xa2?\xa0\x12\xe4)A\x9e\xa2?\xf0\x1b\xd6\xbea\xed\xab?\xf0\x1b\xd6\xbea\xed\xab?\xa0\x12\xe4)A\x9e\xa2?\xf0\x1b\xd6\xbea\xed\xab?{\x14\xaeG\xe1z\x84?\xa0\x12\xe4)A\x9e\x92?{\x14\xaeG\xe1z\x84?\xa0\x12\xe4)A\x9e\x92?\xa0\x12\xe4)A\x9e\x92?{\x14\xaeG\xe1z\x84?\x98\x99\x99\x99\x99\x99\xc9?\xec\x1b\xd6\xbea\xed\xcb?J\x90\xa7\x04yJ\xd0?\xc4\xda7\xac}\xc3\xda?333333\xe3?.\xba\xe8\xa2\x8b.\xea?\xf2\x94 O\t\xf2\xd4?\x18]t\xd1E\x17\xdd?t\xd1E\x17]t\xe1?t\xd1E\x17]t\xe1?t\xd1E\x17]t\xe1?t\xd1E\x17]t\xe1?{\x14\xaeG\xe1z\x84?{\x14\xaeG\xe1z\x84?\xa0\x12\xe4)A\x9e\x92?\xa0\x12\xe4)A\x9e\x92?\xa0\x12\xe4)A\x9e\xa2?\xa0\x12\xe4)A\x9e\xa2?{\x14\xaeG\xe1z\x84?{\x14\xaeG\xe1z\x84?{\x14\xaeG\xe1z\x84?\xa0\x12\xe4)A\x9e\x92?\xa0\x12\xe4)A\x9e\x92?\xa0\x12\xe4)A\x9e\xa2?\xa0\x12\xe4)A\x9e\x92?H\x17]t\xd1E\xb7?t\xd1E\x17]t\xd1?\xe0\xb0\xf6\rk\xdf\xe0?l\xdf\xb0\xf6\rk\xdf?\xee\x1b\xd6\xbea\xed\xdb?{\x14\xaeG\xe1z\x84?\xa0\x12\xe4)A\x9e\x92?D\x17]t\xd1E\xc7?\x1c\xd6\xbea\xed\x1b\xd6?\x9a\x99\x99\x99\x99\x99\xd9?pX\xfb\x86\xb5o\xd8?\xa0\x12\xe4)A\x9e\xa2?\xa0\x12\xe4)A\x9e\xa2?\xa0\x12\xe4)A\x9e\xb2?\xa0\x12\xe4)A\x9e\xb2?\xa0\x12\xe4)A\x9e\xb2?\xa0\x12\xe4)A\x9e\x92?{\x14\xaeG\xe1z\x84?\xa0\x12\xe4)A\x9e\x92?\xa0\x12\xe4)A\x9e\xa2?\xf0\x1b\xd6\xbea\xed\xab?\xa0\x12\xe4)A\x9e\xb2?\xf0\x1b\xd6\xbea\xed\xab?\x98\x99\x99\x99\x99\x99\xc9?\x1c\xd6\xbea\xed\x1b\xd6?\xee\x1b\xd6\xbea\xed\xdb?\xe0\xb0\xf6\rk\xdf\xe0?\x9e\x12\xe4)A\x9e\xe2?333333\xe3?\xf2\x94 O\t\xf2\xd4?\xc4\xda7\xac}\xc3\xda?t\xd1E\x17]t\xe1?]t\xd1E\x17]\xe4?\x87\xb5oX\xfb\x86\xe5?333333\xe3?{\x14\xaeG\xe1z\x84?{\x14\xaeG\xe1z\x84?{\x14\xaeG\xe1z\x84?{\x14\xaeG\xe1z\x84?\xa0\x12\xe4)A\x9e\x92?H\x17]t\xd1E\xb7?{\x14\xaeG\xe1z\x84?{\x14\xaeG\xe1z\x84?{\x14\xaeG\xe1z\x84?\xa0\x12\xe4)A\x9e\x92?\xa0\x12\xe4)A\x9e\x92?\xa0\x12\xe4)A\x9e\x92?\xa0\x12\xe4)A\x9e\x92?H\x17]t\xd1E\xb7?t\xd1E\x17]t\xd1?t\xd1E\x17]t\xe1?t\xd1E\x17]t\xe1?\xf2\x94 O\t\xf2\xd4?{\x14\xaeG\xe1z\x84?\xf0\x1b\xd6\xbea\xed\xab?\xf2\x94 O\t\xf2\xd4?\x9e\x12\xe4)A\x9e\xe2?]t\xd1E\x17]\xe4?l\xdf\xb0\xf6\rk\xdf?\xa0\x12\xe4)A\x9e\xa2?H\x17]t\xd1E\xb7?L\x90\xa7\x04yJ\xc0?@\x9e\x12\xe4)A\xce?@\x9e\x12\xe4)A\xce?\xf4\x94 O\t\xf2\xc4?{\x14\xaeG\xe1z\x84?\xf0\x1b\xd6\xbea\xed\xab?L\x90\xa7\x04yJ\xc0?J\x90\xa7\x04yJ\xd0?\xc8S\x82<%\xc8\xd3?F\x17]t\xd1E\xd7?\x98\x99\x99\x99\x99\x99\xc9?F\x17]t\xd1E\xd7?\x18]t\xd1E\x17\xdd?\n\xf2\x94 O\t\xe2?\xf2\x94 O\t\xf2\xe4?\x9e\x12\xe4)A\x9e\xe2?\xf2\x94 O\t\xf2\xd4?\n\xf2\x94 O\t\xe2?F\x17]t\xd1E\xe7?\xc4\xda7\xac}\xc3\xea?A\x9e\x12\xe4)A\xee?\xee\x1b\xd6\xbea\xed\xeb?{\x14\xaeG\xe1z\x84?{\x14\xaeG\xe1z\x84?\xf0\x1b\xd6\xbea\xed\xab?D\x17]t\xd1E\xc7?\xc4\xda7\xac}\xc3\xda?\x87\xb5oX\xfb\x86\xe5?{\x14\xaeG\xe1z\x84?{\x14\xaeG\xe1z\x84?\xa0\x12\xe4)A\x9e\x92?\xa0\x12\xe4)A\x9e\xa2?\xf0\x1b\xd6\xbea\xed\xbb?\xf2\x94 O\t\xf2\xd4?\xa0\x12\xe4)A\x9e\x92?H\x17]t\xd1E\xb7?\xc8S\x82<%\xc8\xd3?l\xdf\xb0\xf6\rk\xdf?\xaeG\xe1z\x14\xae\xef?\x1c\xd6\xbea\xed\x1b\xe6?{\x14\xaeG\xe1z\x84?\xf0\x1b\xd6\xbea\xed\xab?t\xd1E\x17]t\xd1?\n\xf2\x94 O\t\xe2?J\x90\xa7\x04yJ\xe0?\xa0\x12\xe4)A\x9e\x92?\xa0\x12\xe4)A\x9e\xa2?\xf0\x1b\xd6\xbea\xed\xab?L\x90\xa7\x04yJ\xc0?t\xd1E\x17]t\xd1?F\x17]t\xd1E\xd7?l\xdf\xb0\xf6\rk\xdf?{\x14\xaeG\xe1z\x84?\xf0\x1b\xd6\xbea\xed\xab?L\x90\xa7\x04yJ\xc0?t\xd1E\x17]t\xd1?\x9a\x99\x99\x99\x99\x99\xd9?\xe0\xb0\xf6\rk\xdf\xe0?\x98\x99\x99\x99\x99\x99\xc9?\xc4\xda7\xac}\xc3\xda?\xe0\xb0\xf6\rk\xdf\xe0?333333\xe3?\xc4\xda7\xac}\xc3\xea?\xf2\x94 O\t\xf2\xd4?\xf2\x94 O\t\xf2\xd4?\xe0\xb0\xf6\rk\xdf\xe0?\x87\xb5oX\xfb\x86\xe5?\xdb7\xac}\xc3\xda\xe7?pX\xfb\x86\xb5o\xe8?pX\xfb\x86\xb5o\xe8?{\x14\xaeG\xe1z\x84?{\x14\xaeG\xe1z\x84?\xa0\x12\xe4)A\x9e\x92?\xf0\x1b\xd6\xbea\xed\xab?\xf0\x1b\xd6\xbea\xed\xbb?L\x90\xa7\x04yJ\xc0?{\x14\xaeG\xe1z\x84?{\x14\xaeG\xe1z\x84?\xa0\x12\xe4)A\x9e\xa2?H\x17]t\xd1E\xb7?H\x17]t\xd1E\xb7?H\x17]t\xd1E\xb7?\xa0\x12\xe4)A\x9e\x92?H\x17]t\xd1E\xb7?\x98\x99\x99\x99\x99\x99\xc9?F\x17]t\xd1E\xd7?pX\xfb\x86\xb5o\xd8?\x9a\x99\x99\x99\x99\x99\xd9?{\x14\xaeG\xe1z\x84?{\x14\xaeG\xe1z\x84?L\x90\xa7\x04yJ\xc0?\x98\x99\x99\x99\x99\x99\xc9?t\xd1E\x17]t\xd1?\xf2\x94 O\t\xf2\xd4?\xa0\x12\xe4)A\x9e\xa2?\xf0\x1b\xd6\xbea\xed\xbb?\x98\x99\x99\x99\x99\x99\xc9?@\x9e\x12\xe4)A\xce?\x1c\xd6\xbea\xed\x1b\xd6?\x1c\xd6\xbea\xed\x1b\xd6?{\x14\xaeG\xe1z\x84?\xf0\x1b\xd6\xbea\xed\xab?\xec\x1b\xd6\xbea\xed\xcb?pX\xfb\x86\xb5o\xd8?\xe0\xb0\xf6\rk\xdf\xe0?\xe0\xb0\xf6\rk\xdf\xe0?\x98\x99\x99\x99\x99\x99\xc9?\x9a\x99\x99\x99\x99\x99\xd9?J\x90\xa7\x04yJ\xe0?\x9e\x12\xe4)A\x9e\xe2?333333\xe3?\x9e\x12\xe4)A\x9e\xe2?'
p14
tp15
bag1
(g2
(I0
tp16
g4
tp17
Rp18
(I1
(I2
I13
I8
I6
tp19
g11
I00
S'A\x9e\x12\xe4)A\xee?k\xdf\xb0\xf6\rk\xef?k\xdf\xb0\xf6\rk\xef?k\xdf\xb0\xf6\rk\xef?\xaeG\xe1z\x14\xae\xef?333333\xe3?\xed\x1b\xd6\xbea\xed\xab?\x9e\x12\xe4)A\x9e\xb2?\x9e\x12\xe4)A\x9e\xb2?\xed\x1b\xd6\xbea\xed\xab?{\x14\xaeG\xe1z\x84?{\x14\xaeG\xe1z\x84?\xed\x1b\xd6\xbea\xed\xbb?\xed\x1b\xd6\xbea\xed\xab?\x9e\x12\xe4)A\x9e\x92?{\x14\xaeG\xe1z\x84?{\x14\xaeG\xe1z\x84?{\x14\xaeG\xe1z\x84?J\x90\xa7\x04yJ\xc0?\x9a\x99\x99\x99\x99\x99\xc9?\x1c\xd6\xbea\xed\x1b\xd6?\xc3\xda7\xac}\xc3\xda?\xb1\xf6\rk\xdf\xb0\xe6?\x05yJ\x90\xa7\x04\xe9?F\x17]t\xd1E\xb7?\x9a\x99\x99\x99\x99\x99\xc9?A\x9e\x12\xe4)A\xce?J\x90\xa7\x04yJ\xc0?\xed\x1b\xd6\xbea\xed\xcb?t\xd1E\x17]t\xd1?\x9e\x12\xe4)A\x9e\xc2?\xed\x1b\xd6\xbea\xed\xcb?t\xd1E\x17]t\xd1?J\x90\xa7\x04yJ\xd0?\x9e\x12\xe4)A\x9e\x92?\x9e\x12\xe4)A\x9e\x92?\x9e\x12\xe4)A\x9e\xb2?F\x17]t\xd1E\xb7?\x9e\x12\xe4)A\x9e\xc2?\x9e\x12\xe4)A\x9e\xc2?\xf2\x94 O\t\xf2\xd4?\xed\x1b\xd6\xbea\xed\xcb?\xc8S\x82<%\xc8\xe3?\x1c\xd6\xbea\xed\x1b\xe6?\xdb7\xac}\xc3\xda\xe7?\x9a\x99\x99\x99\x99\x99\xe9?\x9e\x12\xe4)A\x9e\xe2?\x9e\x12\xe4)A\x9e\xb2?A\x9e\x12\xe4)A\xee?\xd6\xbea\xed\x1b\xd6\xee?k\xdf\xb0\xf6\rk\xef?k\xdf\xb0\xf6\rk\xef?\xdb7\xac}\xc3\xda\xe7?{\x14\xaeG\xe1z\x84?\xed\x1b\xd6\xbea\xed\xab?\xed\x1b\xd6\xbea\xed\xab?\xed\x1b\xd6\xbea\xed\xab?\x9e\x12\xe4)A\x9e\xa2?\x9e\x12\xe4)A\x9e\x92?\xed\x1b\xd6\xbea\xed\xab?\xed\x1b\xd6\xbea\xed\xbb?\xed\x1b\xd6\xbea\xed\xab?\x9e\x12\xe4)A\x9e\x92?{\x14\xaeG\xe1z\x84?{\x14\xaeG\xe1z\x84?{\x14\xaeG\xe1z\x84?J\x90\xa7\x04yJ\xc0?\x9a\x99\x99\x99\x99\x99\xc9?pX\xfb\x86\xb5o\xd8?\xf2\x94 O\t\xf2\xe4?A\x9e\x12\xe4)A\xee?\x9e\x12\xe4)A\x9e\xe2?F\x17]t\xd1E\xb7?\x9a\x99\x99\x99\x99\x99\xc9?\xf2\x94 O\t\xf2\xd4?\x9a\x99\x99\x99\x99\x99\xd9?\x9e\x12\xe4)A\x9e\xd2?\xed\x1b\xd6\xbea\xed\xbb?\x9e\x12\xe4)A\x9e\xc2?A\x9e\x12\xe4)A\xce?\x9e\x12\xe4)A\x9e\xd2?\xed\x1b\xd6\xbea\xed\xcb?\x9e\x12\xe4)A\x9e\xa2?\x9e\x12\xe4)A\x9e\x92?\x9e\x12\xe4)A\x9e\xb2?F\x17]t\xd1E\xb7?J\x90\xa7\x04yJ\xc0?\x9e\x12\xe4)A\x9e\xc2?\x9e\x12\xe4)A\x9e\xd2?\x9a\x99\x99\x99\x99\x99\xc9?\xc8S\x82<%\xc8\xe3?\x1c\xd6\xbea\xed\x1b\xe6?\xb1\xf6\rk\xdf\xb0\xe6?\x9e\x12\xe4)A\x9e\xe2?J\x90\xa7\x04yJ\xd0?{\x14\xaeG\xe1z\x84?A\x9e\x12\xe4)A\xee?k\xdf\xb0\xf6\rk\xef?k\xdf\xb0\xf6\rk\xef?k\xdf\xb0\xf6\rk\xef?\xac}\xc3\xda7\xac\xed?F\x17]t\xd1E\xc7?\xed\x1b\xd6\xbea\xed\xab?\xed\x1b\xd6\xbea\xed\xab?\x9e\x12\xe4)A\x9e\xa2?\x9e\x12\xe4)A\x9e\xa2?\x9e\x12\xe4)A\x9e\x92?\xed\x1b\xd6\xbea\xed\xab?\xed\x1b\xd6\xbea\xed\xbb?\xed\x1b\xd6\xbea\xed\xab?{\x14\xaeG\xe1z\x84?{\x14\xaeG\xe1z\x84?{\x14\xaeG\xe1z\x84?{\x14\xaeG\xe1z\x84?J\x90\xa7\x04yJ\xc0?\x9a\x99\x99\x99\x99\x99\xc9?pX\xfb\x86\xb5o\xd8?\x1c\xd6\xbea\xed\x1b\xe6?\xac}\xc3\xda7\xac\xed?pX\xfb\x86\xb5o\xe8?F\x17]t\xd1E\xb7?J\x90\xa7\x04yJ\xd0?\x9a\x99\x99\x99\x99\x99\xd9?\t\xf2\x94 O\t\xe2?t\xd1E\x17]t\xe1?t\xd1E\x17]t\xe1?\x9e\x12\xe4)A\x9e\xc2?J\x90\xa7\x04yJ\xd0?\xc3\xda7\xac}\xc3\xda?F\x17]t\xd1E\xd7?\x9a\x99\x99\x99\x99\x99\xc9?\xed\x1b\xd6\xbea\xed\xab?\x9e\x12\xe4)A\x9e\xb2?\xed\x1b\xd6\xbea\xed\xbb?J\x90\xa7\x04yJ\xc0?\xf2\x94 O\t\xf2\xc4?\x9e\x12\xe4)A\x9e\xd2?\xed\x1b\xd6\xbea\xed\xcb?\xc8S\x82<%\xc8\xe3?\x1c\xd6\xbea\xed\x1b\xe6?\x87\xb5oX\xfb\x86\xe5?pX\xfb\x86\xb5o\xe8?\xf2\x94 O\t\xf2\xd4?{\x14\xaeG\xe1z\x84?A\x9e\x12\xe4)A\xee?\xd6\xbea\xed\x1b\xd6\xee?k\xdf\xb0\xf6\rk\xef?k\xdf\xb0\xf6\rk\xef?\xac}\xc3\xda7\xac\xed?\x9e\x12\xe4)A\x9e\xa2?\xed\x1b\xd6\xbea\xed\xab?\x9e\x12\xe4)A\x9e\xb2?\xed\x1b\xd6\xbea\xed\xab?{\x14\xaeG\xe1z\x84?{\x14\xaeG\xe1z\x84?{\x14\xaeG\xe1z\x84?\xed\x1b\xd6\xbea\xed\xbb?\xed\x1b\xd6\xbea\xed\xab?{\x14\xaeG\xe1z\x84?{\x14\xaeG\xe1z\x84?{\x14\xaeG\xe1z\x84?{\x14\xaeG\xe1z\x84?J\x90\xa7\x04yJ\xc0?\x9a\x99\x99\x99\x99\x99\xc9?pX\xfb\x86\xb5o\xd8?\x87\xb5oX\xfb\x86\xe5?\xc3\xda7\xac}\xc3\xea?\x1c\xd6\xbea\xed\x1b\xd6?F\x17]t\xd1E\xb7?J\x90\xa7\x04yJ\xd0?k\xdf\xb0\xf6\rk\xdf?\xc8S\x82<%\xc8\xe3?\xb1\xf6\rk\xdf\xb0\xe6?\xd6\xbea\xed\x1b\xd6\xee?\x9e\x12\xe4)A\x9e\xc2?A\x9e\x12\xe4)A\xce?\x9a\x99\x99\x99\x99\x99\xd9?\xc8S\x82<%\xc8\xd3?F\x17]t\xd1E\xc7?{\x14\xaeG\xe1z\x84?\x9e\x12\xe4)A\x9e\xb2?F\x17]t\xd1E\xb7?F\x17]t\xd1E\xb7?F\x17]t\xd1E\xb7?\x9e\x12\xe4)A\x9e\xa2?{\x14\xaeG\xe1z\x84?\xc8S\x82<%\xc8\xe3?\xc8S\x82<%\xc8\xe3?\xc8S\x82<%\xc8\xe3?\t\xf2\x94 O\t\xe2?pX\xfb\x86\xb5o\xd8?{\x14\xaeG\xe1z\x84?A\x9e\x12\xe4)A\xee?\xd6\xbea\xed\x1b\xd6\xee?\xd6\xbea\xed\x1b\xd6\xee?A\x9e\x12\xe4)A\xee?\x82<%\xc8S\x82\xec?F\x17]t\xd1E\xb7?\xed\x1b\xd6\xbea\xed\xab?\xed\x1b\xd6\xbea\xed\xab?\xed\x1b\xd6\xbea\xed\xab?\x9e\x12\xe4)A\x9e\xa2?\x9e\x12\xe4)A\x9e\xa2?A\x9e\x12\xe4)A\xce?\xed\x1b\xd6\xbea\xed\xbb?\x9e\x12\xe4)A\x9e\xb2?{\x14\xaeG\xe1z\x84?{\x14\xaeG\xe1z\x84?{\x14\xaeG\xe1z\x84?{\x14\xaeG\xe1z\x84?J\x90\xa7\x04yJ\xc0?t\xd1E\x17]t\xd1?]t\xd1E\x17]\xe4?\xed\x1b\xd6\xbea\xed\xeb?k\xdf\xb0\xf6\rk\xef?\xd6\xbea\xed\x1b\xd6\xee?F\x17]t\xd1E\xb7?\x1c\xd6\xbea\xed\x1b\xd6?333333\xe3?\xdb7\xac}\xc3\xda\xe7?\xed\x1b\xd6\xbea\xed\xeb?J\x90\xa7\x04yJ\xd0?\x9e\x12\xe4)A\x9e\xc2?\x9e\x12\xe4)A\x9e\xd2?\xf2\x94 O\t\xf2\xd4?t\xd1E\x17]t\xd1?\x9e\x12\xe4)A\x9e\xd2?\x9e\x12\xe4)A\x9e\xe2?\x9e\x12\xe4)A\x9e\xb2?\x9e\x12\xe4)A\x9e\xb2?\x9e\x12\xe4)A\x9e\xb2?{\x14\xaeG\xe1z\x84?{\x14\xaeG\xe1z\x84?{\x14\xaeG\xe1z\x84?\xc8S\x82<%\xc8\xe3?333333\xe3?\xc3\xda7\xac}\xc3\xda?\xf2\x94 O\t\xf2\xc4?\xed\x1b\xd6\xbea\xed\xbb?F\x17]t\xd1E\xb7?A\x9e\x12\xe4)A\xee?\xd6\xbea\xed\x1b\xd6\xee?A\x9e\x12\xe4)A\xee?/\xba\xe8\xa2\x8b.\xea?\xb1\xf6\rk\xdf\xb0\xe6?pX\xfb\x86\xb5o\xd8?\xed\x1b\xd6\xbea\xed\xab?\xed\x1b\xd6\xbea\xed\xab?\xed\x1b\xd6\xbea\xed\xab?\x9e\x12\xe4)A\x9e\xb2?J\x90\xa7\x04yJ\xc0?F\x17]t\xd1E\xd7?\xed\x1b\xd6\xbea\xed\xbb?\x9e\x12\xe4)A\x9e\xb2?{\x14\xaeG\xe1z\x84?{\x14\xaeG\xe1z\x84?{\x14\xaeG\xe1z\x84?{\x14\xaeG\xe1z\x84?J\x90\xa7\x04yJ\xc0?A\x9e\x12\xe4)A\xce?]t\xd1E\x17]\xe4?X\xfb\x86\xb5oX\xeb?\x82<%\xc8S\x82\xec?333333\xe3?F\x17]t\xd1E\xb7?\xf2\x94 O\t\xf2\xd4?\x9e\x12\xe4)A\x9e\xe2?\xdb7\xac}\xc3\xda\xe7?\xc8S\x82<%\xc8\xe3?A\x9e\x12\xe4)A\xce?\x9e\x12\xe4)A\x9e\xc2?\x9e\x12\xe4)A\x9e\xd2?\xf2\x94 O\t\xf2\xd4?J\x90\xa7\x04yJ\xd0?\xed\x1b\xd6\xbea\xed\xcb?\xdf\xb0\xf6\rk\xdf\xe0?\x9e\x12\xe4)A\x9e\xb2?\x9e\x12\xe4)A\x9e\xb2?F\x17]t\xd1E\xb7?\x9e\x12\xe4)A\x9e\xa2?{\x14\xaeG\xe1z\x84?{\x14\xaeG\xe1z\x84?\xc8S\x82<%\xc8\xe3?333333\xe3?\xc3\xda7\xac}\xc3\xda?\x9a\x99\x99\x99\x99\x99\xc9?\xed\x1b\xd6\xbea\xed\xbb?\x9e\x12\xe4)A\x9e\xa2?A\x9e\x12\xe4)A\xee?A\x9e\x12\xe4)A\xee?\xed\x1b\xd6\xbea\xed\xeb?333333\xe3?\xc3\xda7\xac}\xc3\xda?\x9e\x12\xe4)A\x9e\xc2?\xed\x1b\xd6\xbea\xed\xab?\x9e\x12\xe4)A\x9e\xb2?F\x17]t\xd1E\xb7?\x9e\x12\xe4)A\x9e\xc2?\x9e\x12\xe4)A\x9e\xb2?\xed\x1b\xd6\xbea\xed\xcb?\xed\x1b\xd6\xbea\xed\xbb?\x9e\x12\xe4)A\x9e\xb2?\x9e\x12\xe4)A\x9e\x92?{\x14\xaeG\xe1z\x84?{\x14\xaeG\xe1z\x84?{\x14\xaeG\xe1z\x84?J\x90\xa7\x04yJ\xc0?A\x9e\x12\xe4)A\xce?]t\xd1E\x17]\xe4?\xac}\xc3\xda7\xac\xed?t\xd1E\x17]t\xe1?\x9e\x12\xe4)A\x9e\xa2?F\x17]t\xd1E\xb7?t\xd1E\x17]t\xd1?t\xd1E\x17]t\xe1?t\xd1E\x17]t\xe1?\x9e\x12\xe4)A\x9e\xc2?\x9e\x12\xe4)A\x9e\x92?\x9e\x12\xe4)A\x9e\xc2?A\x9e\x12\xe4)A\xce?t\xd1E\x17]t\xd1?A\x9e\x12\xe4)A\xce?\x9e\x12\xe4)A\x9e\xb2?\x9e\x12\xe4)A\x9e\xc2?\x9e\x12\xe4)A\x9e\xb2?\x9e\x12\xe4)A\x9e\xb2?\xed\x1b\xd6\xbea\xed\xab?{\x14\xaeG\xe1z\x84?{\x14\xaeG\xe1z\x84?{\x14\xaeG\xe1z\x84?\xc8S\x82<%\xc8\xe3?\x9e\x12\xe4)A\x9e\xe2?pX\xfb\x86\xb5o\xd8?\x9a\x99\x99\x99\x99\x99\xc9?F\x17]t\xd1E\xb7?{\x14\xaeG\xe1z\x84?A\x9e\x12\xe4)A\xee?\xd6\xbea\xed\x1b\xd6\xee?k\xdf\xb0\xf6\rk\xef?\xed\x1b\xd6\xbea\xed\xeb?\xc3\xda7\xac}\xc3\xea?\t\xf2\x94 O\t\xe2?\xed\x1b\xd6\xbea\xed\xab?\xed\x1b\xd6\xbea\xed\xab?F\x17]t\xd1E\xb7?\xf2\x94 O\t\xf2\xc4?\xf2\x94 O\t\xf2\xc4?\xed\x1b\xd6\xbea\xed\xdb?\xed\x1b\xd6\xbea\xed\xbb?\x9e\x12\xe4)A\x9e\xb2?\xed\x1b\xd6\xbea\xed\xab?\x9e\x12\xe4)A\x9e\xa2?{\x14\xaeG\xe1z\x84?{\x14\xaeG\xe1z\x84?J\x90\xa7\x04yJ\xc0?\xed\x1b\xd6\xbea\xed\xcb?\t\xf2\x94 O\t\xe2?\xc3\xda7\xac}\xc3\xea?\xf2\x94 O\t\xf2\xd4?{\x14\xaeG\xe1z\x84?F\x17]t\xd1E\xb7?\x9e\x12\xe4)A\x9e\xd2?333333\xe3?\x9e\x12\xe4)A\x9e\xe2?\xed\x1b\xd6\xbea\xed\xbb?\x9e\x12\xe4)A\x9e\xa2?\x9e\x12\xe4)A\x9e\xc2?A\x9e\x12\xe4)A\xce?J\x90\xa7\x04yJ\xd0?A\x9e\x12\xe4)A\xce?\x9e\x12\xe4)A\x9e\xc2?\x9e\x12\xe4)A\x9e\xa2?\x9e\x12\xe4)A\x9e\xb2?\x9e\x12\xe4)A\x9e\xb2?\x9e\x12\xe4)A\x9e\xa2?{\x14\xaeG\xe1z\x84?{\x14\xaeG\xe1z\x84?{\x14\xaeG\xe1z\x84?\xc8S\x82<%\xc8\xe3?\x9e\x12\xe4)A\x9e\xe2?\x17]t\xd1E\x17\xdd?\x9e\x12\xe4)A\x9e\xd2?\xed\x1b\xd6\xbea\xed\xcb?\x9e\x12\xe4)A\x9e\xb2?A\x9e\x12\xe4)A\xee?k\xdf\xb0\xf6\rk\xef?k\xdf\xb0\xf6\rk\xef?\xaeG\xe1z\x14\xae\xef?\xaeG\xe1z\x14\xae\xef?\xaeG\xe1z\x14\xae\xef?\xed\x1b\xd6\xbea\xed\xab?\x9e\x12\xe4)A\x9e\xb2?F\x17]t\xd1E\xb7?\x9a\x99\x99\x99\x99\x99\xc9?\xdf\xb0\xf6\rk\xdf\xe0?\xed\x1b\xd6\xbea\xed\xeb?\xed\x1b\xd6\xbea\xed\xbb?\x9e\x12\xe4)A\x9e\xb2?\xed\x1b\xd6\xbea\xed\xab?\x9e\x12\xe4)A\x9e\xa2?{\x14\xaeG\xe1z\x84?{\x14\xaeG\xe1z\x84?J\x90\xa7\x04yJ\xc0?\x9e\x12\xe4)A\x9e\xd2?\x1c\xd6\xbea\xed\x1b\xe6?\xd6\xbea\xed\x1b\xd6\xee?\xaeG\xe1z\x14\xae\xef?\xaeG\xe1z\x14\xae\xef?F\x17]t\xd1E\xb7?\xf2\x94 O\t\xf2\xd4?\xb1\xf6\rk\xdf\xb0\xe6?X\xfb\x86\xb5oX\xeb?\xd6\xbea\xed\x1b\xd6\xee?\x9e\x12\xe4)A\x9e\xe2?\x9e\x12\xe4)A\x9e\xc2?\x9a\x99\x99\x99\x99\x99\xc9?\xc8S\x82<%\xc8\xd3?t\xd1E\x17]t\xd1?A\x9e\x12\xe4)A\xce?\xed\x1b\xd6\xbea\xed\xbb?\x9e\x12\xe4)A\x9e\xb2?F\x17]t\xd1E\xb7?\xed\x1b\xd6\xbea\xed\xab?\x9e\x12\xe4)A\x9e\x92?\x9e\x12\xe4)A\x9e\xb2?J\x90\xa7\x04yJ\xd0?\xc8S\x82<%\xc8\xe3?F\x17]t\xd1E\xe7?\x1c\xd6\xbea\xed\x1b\xe6?\xb1\xf6\rk\xdf\xb0\xe6?\xb1\xf6\rk\xdf\xb0\xe6?333333\xe3?A\x9e\x12\xe4)A\xee?k\xdf\xb0\xf6\rk\xef?k\xdf\xb0\xf6\rk\xef?\xaeG\xe1z\x14\xae\xef?\xaeG\xe1z\x14\xae\xef?\xaeG\xe1z\x14\xae\xef?\xed\x1b\xd6\xbea\xed\xab?\x9e\x12\xe4)A\x9e\xb2?F\x17]t\xd1E\xb7?F\x17]t\xd1E\xb7?\xed\x1b\xd6\xbea\xed\xcb?F\x17]t\xd1E\xd7?\xed\x1b\xd6\xbea\xed\xbb?\xed\x1b\xd6\xbea\xed\xab?\xed\x1b\xd6\xbea\xed\xab?\x9e\x12\xe4)A\x9e\x92?{\x14\xaeG\xe1z\x84?{\x14\xaeG\xe1z\x84?J\x90\xa7\x04yJ\xc0?\xed\x1b\xd6\xbea\xed\xcb?\xed\x1b\xd6\xbea\xed\xdb?\x05yJ\x90\xa7\x04\xe9?\xed\x1b\xd6\xbea\xed\xeb?\xf2\x94 O\t\xf2\xe4?F\x17]t\xd1E\xb7?\xc8S\x82<%\xc8\xd3?\xc8S\x82<%\xc8\xe3?A\x9e\x12\xe4)A\xee?\xaeG\xe1z\x14\xae\xef?\xc3\xda7\xac}\xc3\xea?\x9e\x12\xe4)A\x9e\xc2?\x9a\x99\x99\x99\x99\x99\xc9?pX\xfb\x86\xb5o\xd8?\x9a\x99\x99\x99\x99\x99\xd9?A\x9e\x12\xe4)A\xde?A\x9e\x12\xe4)A\xce?\x9e\x12\xe4)A\x9e\xb2?F\x17]t\xd1E\xb7?J\x90\xa7\x04yJ\xc0?J\x90\xa7\x04yJ\xc0?F\x17]t\xd1E\xb7?\x9e\x12\xe4)A\x9e\x92?\xc8S\x82<%\xc8\xe3?F\x17]t\xd1E\xe7?\x05yJ\x90\xa7\x04\xe9?\x17]t\xd1E\x17\xed?A\x9e\x12\xe4)A\xee?\x17]t\xd1E\x17\xed?A\x9e\x12\xe4)A\xee?\xd6\xbea\xed\x1b\xd6\xee?k\xdf\xb0\xf6\rk\xef?k\xdf\xb0\xf6\rk\xef?k\xdf\xb0\xf6\rk\xef?k\xdf\xb0\xf6\rk\xef?\xed\x1b\xd6\xbea\xed\xab?\xed\x1b\xd6\xbea\xed\xab?\x9e\x12\xe4)A\x9e\xb2?\x9e\x12\xe4)A\x9e\xb2?\xed\x1b\xd6\xbea\xed\xab?\x9e\x12\xe4)A\x9e\xb2?\xed\x1b\xd6\xbea\xed\xbb?\xed\x1b\xd6\xbea\xed\xab?\xed\x1b\xd6\xbea\xed\xab?\x9e\x12\xe4)A\x9e\x92?\x9e\x12\xe4)A\x9e\x92?{\x14\xaeG\xe1z\x84?J\x90\xa7\x04yJ\xc0?F\x17]t\xd1E\xc7?\xc8S\x82<%\xc8\xd3?\xed\x1b\xd6\xbea\xed\xdb?t\xd1E\x17]t\xe1?J\x90\xa7\x04yJ\xe0?F\x17]t\xd1E\xb7?\x9e\x12\xe4)A\x9e\xd2?\t\xf2\x94 O\t\xe2?\x82<%\xc8S\x82\xec?\xaeG\xe1z\x14\xae\xef?\xaeG\xe1z\x14\xae\xef?\x9e\x12\xe4)A\x9e\xc2?A\x9e\x12\xe4)A\xce?pX\xfb\x86\xb5o\xd8?k\xdf\xb0\xf6\rk\xdf?\x1c\xd6\xbea\xed\x1b\xd6?A\x9e\x12\xe4)A\xce?\x9e\x12\xe4)A\x9e\xb2?F\x17]t\xd1E\xb7?\xed\x1b\xd6\xbea\xed\xbb?\xed\x1b\xd6\xbea\xed\xbb?F\x17]t\xd1E\xb7?\x9e\x12\xe4)A\x9e\xa2?\xc8S\x82<%\xc8\xe3?\xb1\xf6\rk\xdf\xb0\xe6?\xdb7\xac}\xc3\xda\xe7?\xc3\xda7\xac}\xc3\xea?pX\xfb\x86\xb5o\xe8?\xdb7\xac}\xc3\xda\xe7?A\x9e\x12\xe4)A\xee?\xd6\xbea\xed\x1b\xd6\xee?k\xdf\xb0\xf6\rk\xef?k\xdf\xb0\xf6\rk\xef?k\xdf\xb0\xf6\rk\xef?k\xdf\xb0\xf6\rk\xef?\xed\x1b\xd6\xbea\xed\xab?\xed\x1b\xd6\xbea\xed\xab?\xed\x1b\xd6\xbea\xed\xab?J\x90\xa7\x04yJ\xc0?\xc8S\x82<%\xc8\xd3?\x1c\xd6\xbea\xed\x1b\xd6?\xed\x1b\xd6\xbea\xed\xbb?\x9e\x12\xe4)A\x9e\xb2?\x9e\x12\xe4)A\x9e\xa2?\x9e\x12\xe4)A\x9e\xa2?{\x14\xaeG\xe1z\x84?{\x14\xaeG\xe1z\x84?J\x90\xa7\x04yJ\xc0?\x9a\x99\x99\x99\x99\x99\xc9?\x9a\x99\x99\x99\x99\x99\xd9?\t\xf2\x94 O\t\xe2?\xc3\xda7\xac}\xc3\xea?\xac}\xc3\xda7\xac\xed?F\x17]t\xd1E\xb7?\xf2\x94 O\t\xf2\xd4?t\xd1E\x17]t\xe1?\x05yJ\x90\xa7\x04\xe9?A\x9e\x12\xe4)A\xee?\xaeG\xe1z\x14\xae\xef?\x9e\x12\xe4)A\x9e\xc2?J\x90\xa7\x04yJ\xd0?\xed\x1b\xd6\xbea\xed\xdb?\xdf\xb0\xf6\rk\xdf\xe0?\t\xf2\x94 O\t\xe2?\t\xf2\x94 O\t\xe2?\x9e\x12\xe4)A\x9e\xb2?F\x17]t\xd1E\xb7?J\x90\xa7\x04yJ\xc0?\x9a\x99\x99\x99\x99\x99\xc9?A\x9e\x12\xe4)A\xce?\xc8S\x82<%\xc8\xd3?\xc8S\x82<%\xc8\xe3?F\x17]t\xd1E\xe7?/\xba\xe8\xa2\x8b.\xea?\xc3\xda7\xac}\xc3\xea?\xed\x1b\xd6\xbea\xed\xeb?X\xfb\x86\xb5oX\xeb?A\x9e\x12\xe4)A\xee?\xd6\xbea\xed\x1b\xd6\xee?k\xdf\xb0\xf6\rk\xef?k\xdf\xb0\xf6\rk\xef?k\xdf\xb0\xf6\rk\xef?k\xdf\xb0\xf6\rk\xef?\xed\x1b\xd6\xbea\xed\xab?\x9e\x12\xe4)A\x9e\xb2?\xed\x1b\xd6\xbea\xed\xbb?\xed\x1b\xd6\xbea\xed\xcb?\x17]t\xd1E\x17\xdd?]t\xd1E\x17]\xe4?\xed\x1b\xd6\xbea\xed\xbb?\x9e\x12\xe4)A\x9e\xb2?F\x17]t\xd1E\xb7?\xed\x1b\xd6\xbea\xed\xbb?\x9e\x12\xe4)A\x9e\xb2?\x9e\x12\xe4)A\x9e\xb2?J\x90\xa7\x04yJ\xc0?\xed\x1b\xd6\xbea\xed\xcb?\x9a\x99\x99\x99\x99\x99\xd9?J\x90\xa7\x04yJ\xe0?/\xba\xe8\xa2\x8b.\xea?\x82<%\xc8S\x82\xec?F\x17]t\xd1E\xb7?\x9e\x12\xe4)A\x9e\xd2?\xdf\xb0\xf6\rk\xdf\xe0?\xdb7\xac}\xc3\xda\xe7?\x82<%\xc8S\x82\xec?A\x9e\x12\xe4)A\xee?\x9e\x12\xe4)A\x9e\xc2?J\x90\xa7\x04yJ\xd0?\x17]t\xd1E\x17\xdd?\x87\xb5oX\xfb\x86\xe5?\x9a\x99\x99\x99\x99\x99\xe9?\xed\x1b\xd6\xbea\xed\xeb?\x9e\x12\xe4)A\x9e\xb2?\xed\x1b\xd6\xbea\xed\xbb?\xf2\x94 O\t\xf2\xc4?\xf2\x94 O\t\xf2\xd4?\x17]t\xd1E\x17\xdd?\x9e\x12\xe4)A\x9e\xe2?\xc8S\x82<%\xc8\xe3?\xdb7\xac}\xc3\xda\xe7?X\xfb\x86\xb5oX\xeb?k\xdf\xb0\xf6\rk\xef?\xaeG\xe1z\x14\xae\xef?\xaeG\xe1z\x14\xae\xef?\xf2\x94 O\t\xf2\xd4?\xf2\x94 O\t\xf2\xd4?F\x17]t\xd1E\xd7?\xf2\x94 O\t\xf2\xd4?\x98\x99\x99\x99\x99\x99\xc9?\xa0\x12\xe4)A\x9e\xa2?{\x14\xaeG\xe1z\x84?{\x14\xaeG\xe1z\x84?{\x14\xaeG\xe1z\x84?{\x14\xaeG\xe1z\x84?{\x14\xaeG\xe1z\x84?{\x14\xaeG\xe1z\x84?{\x14\xaeG\xe1z\x84?{\x14\xaeG\xe1z\x84?{\x14\xaeG\xe1z\x84?{\x14\xaeG\xe1z\x84?{\x14\xaeG\xe1z\x84?{\x14\xaeG\xe1z\x84?\xa0\x12\xe4)A\x9e\x92?\xa0\x12\xe4)A\x9e\xa2?\xa0\x12\xe4)A\x9e\xa2?\xa0\x12\xe4)A\x9e\xa2?\xa0\x12\xe4)A\x9e\xa2?\xa0\x12\xe4)A\x9e\xa2?{\x14\xaeG\xe1z\x84?{\x14\xaeG\xe1z\x84?{\x14\xaeG\xe1z\x84?{\x14\xaeG\xe1z\x84?{\x14\xaeG\xe1z\x84?{\x14\xaeG\xe1z\x84?\xa0\x12\xe4)A\x9e\xa2?\xa0\x12\xe4)A\x9e\xa2?\xa0\x12\xe4)A\x9e\xa2?{\x14\xaeG\xe1z\x84?{\x14\xaeG\xe1z\x84?{\x14\xaeG\xe1z\x84?{\x14\xaeG\xe1z\x84?\xa0\x12\xe4)A\x9e\x92?\xa0\x12\xe4)A\x9e\x92?\xa0\x12\xe4)A\x9e\xa2?\xa0\x12\xe4)A\x9e\x92?{\x14\xaeG\xe1z\x84?\x98\x99\x99\x99\x99\x99\xc9?\xec\x1b\xd6\xbea\xed\xcb?L\x90\xa7\x04yJ\xc0?H\x17]t\xd1E\xb7?\xf0\x1b\xd6\xbea\xed\xab?{\x14\xaeG\xe1z\x84?\xf2\x94 O\t\xf2\xd4?\xf2\x94 O\t\xf2\xd4?t\xd1E\x17]t\xd1?t\xd1E\x17]t\xd1?\xa0\x12\xe4)A\x9e\xc2?{\x14\xaeG\xe1z\x84?{\x14\xaeG\xe1z\x84?{\x14\xaeG\xe1z\x84?{\x14\xaeG\xe1z\x84?{\x14\xaeG\xe1z\x84?{\x14\xaeG\xe1z\x84?{\x14\xaeG\xe1z\x84?{\x14\xaeG\xe1z\x84?{\x14\xaeG\xe1z\x84?{\x14\xaeG\xe1z\x84?{\x14\xaeG\xe1z\x84?{\x14\xaeG\xe1z\x84?{\x14\xaeG\xe1z\x84?\xa0\x12\xe4)A\x9e\x92?\xf0\x1b\xd6\xbea\xed\xab?\xf0\x1b\xd6\xbea\xed\xab?\xf0\x1b\xd6\xbea\xed\xab?\xa0\x12\xe4)A\x9e\xa2?\xa0\x12\xe4)A\x9e\xa2?{\x14\xaeG\xe1z\x84?{\x14\xaeG\xe1z\x84?{\x14\xaeG\xe1z\x84?{\x14\xaeG\xe1z\x84?{\x14\xaeG\xe1z\x84?{\x14\xaeG\xe1z\x84?\xa0\x12\xe4)A\x9e\xa2?\xa0\x12\xe4)A\x9e\xa2?\xa0\x12\xe4)A\x9e\xa2?{\x14\xaeG\xe1z\x84?{\x14\xaeG\xe1z\x84?{\x14\xaeG\xe1z\x84?{\x14\xaeG\xe1z\x84?\xa0\x12\xe4)A\x9e\x92?\xa0\x12\xe4)A\x9e\xa2?\xa0\x12\xe4)A\x9e\x92?{\x14\xaeG\xe1z\x84?{\x14\xaeG\xe1z\x84?\x98\x99\x99\x99\x99\x99\xc9?\x98\x99\x99\x99\x99\x99\xc9?\xf0\x1b\xd6\xbea\xed\xbb?\xa0\x12\xe4)A\x9e\xa2?{\x14\xaeG\xe1z\x84?{\x14\xaeG\xe1z\x84?\xf2\x94 O\t\xf2\xd4?\xf2\x94 O\t\xf2\xd4?\xf2\x94 O\t\xf2\xd4?J\x90\xa7\x04yJ\xd0?L\x90\xa7\x04yJ\xc0?{\x14\xaeG\xe1z\x84?{\x14\xaeG\xe1z\x84?{\x14\xaeG\xe1z\x84?{\x14\xaeG\xe1z\x84?{\x14\xaeG\xe1z\x84?{\x14\xaeG\xe1z\x84?{\x14\xaeG\xe1z\x84?{\x14\xaeG\xe1z\x84?{\x14\xaeG\xe1z\x84?{\x14\xaeG\xe1z\x84?{\x14\xaeG\xe1z\x84?{\x14\xaeG\xe1z\x84?\xa0\x12\xe4)A\x9e\xa2?\xa0\x12\xe4)A\x9e\x92?\xf0\x1b\xd6\xbea\xed\xab?\xf0\x1b\xd6\xbea\xed\xab?\xa0\x12\xe4)A\x9e\xb2?\xf0\x1b\xd6\xbea\xed\xab?\xa0\x12\xe4)A\x9e\x92?{\x14\xaeG\xe1z\x84?{\x14\xaeG\xe1z\x84?{\x14\xaeG\xe1z\x84?{\x14\xaeG\xe1z\x84?{\x14\xaeG\xe1z\x84?{\x14\xaeG\xe1z\x84?\xa0\x12\xe4)A\x9e\xa2?\xf0\x1b\xd6\xbea\xed\xab?\xa0\x12\xe4)A\x9e\xa2?\xa0\x12\xe4)A\x9e\x92?{\x14\xaeG\xe1z\x84?{\x14\xaeG\xe1z\x84?{\x14\xaeG\xe1z\x84?\xa0\x12\xe4)A\x9e\x92?\xa0\x12\xe4)A\x9e\xa2?\xa0\x12\xe4)A\x9e\xa2?\xa0\x12\xe4)A\x9e\x92?{\x14\xaeG\xe1z\x84?\x98\x99\x99\x99\x99\x99\xc9?\x98\x99\x99\x99\x99\x99\xc9?\xa0\x12\xe4)A\x9e\xc2?H\x17]t\xd1E\xb7?\xa0\x12\xe4)A\x9e\x92?{\x14\xaeG\xe1z\x84?\xf2\x94 O\t\xf2\xd4?\xc8S\x82<%\xc8\xd3?\x9e\x12\xe4)A\x9e\xd2?t\xd1E\x17]t\xd1?\xa0\x12\xe4)A\x9e\xc2?{\x14\xaeG\xe1z\x84?{\x14\xaeG\xe1z\x84?{\x14\xaeG\xe1z\x84?{\x14\xaeG\xe1z\x84?{\x14\xaeG\xe1z\x84?{\x14\xaeG\xe1z\x84?{\x14\xaeG\xe1z\x84?{\x14\xaeG\xe1z\x84?{\x14\xaeG\xe1z\x84?{\x14\xaeG\xe1z\x84?{\x14\xaeG\xe1z\x84?{\x14\xaeG\xe1z\x84?\xa0\x12\xe4)A\x9e\x92?\xa0\x12\xe4)A\x9e\x92?\xf0\x1b\xd6\xbea\xed\xab?\xf0\x1b\xd6\xbea\xed\xab?\xa0\x12\xe4)A\x9e\xb2?\xa0\x12\xe4)A\x9e\xb2?\xa0\x12\xe4)A\x9e\xa2?{\x14\xaeG\xe1z\x84?{\x14\xaeG\xe1z\x84?{\x14\xaeG\xe1z\x84?{\x14\xaeG\xe1z\x84?{\x14\xaeG\xe1z\x84?{\x14\xaeG\xe1z\x84?\xa0\x12\xe4)A\x9e\xa2?\xa0\x12\xe4)A\x9e\xa2?\xa0\x12\xe4)A\x9e\xa2?{\x14\xaeG\xe1z\x84?{\x14\xaeG\xe1z\x84?{\x14\xaeG\xe1z\x84?{\x14\xaeG\xe1z\x84?\xa0\x12\xe4)A\x9e\x92?\xa0\x12\xe4)A\x9e\x92?\xa0\x12\xe4)A\x9e\x92?{\x14\xaeG\xe1z\x84?{\x14\xaeG\xe1z\x84?\x98\x99\x99\x99\x99\x99\xc9?\x98\x99\x99\x99\x99\x99\xc9?L\x90\xa7\x04yJ\xc0?\xf0\x1b\xd6\xbea\xed\xab?\xa0\x12\xe4)A\x9e\xa2?{\x14\xaeG\xe1z\x84?\xf2\x94 O\t\xf2\xd4?\x9e\x12\xe4)A\x9e\xd2?\xf4\x94 O\t\xf2\xc4?\xf0\x1b\xd6\xbea\xed\xbb?\xa0\x12\xe4)A\x9e\x92?{\x14\xaeG\xe1z\x84?{\x14\xaeG\xe1z\x84?{\x14\xaeG\xe1z\x84?{\x14\xaeG\xe1z\x84?{\x14\xaeG\xe1z\x84?{\x14\xaeG\xe1z\x84?{\x14\xaeG\xe1z\x84?{\x14\xaeG\xe1z\x84?{\x14\xaeG\xe1z\x84?{\x14\xaeG\xe1z\x84?{\x14\xaeG\xe1z\x84?{\x14\xaeG\xe1z\x84?{\x14\xaeG\xe1z\x84?\xa0\x12\xe4)A\x9e\x92?\xa0\x12\xe4)A\x9e\xb2?\xf0\x1b\xd6\xbea\xed\xbb?J\x90\xa7\x04yJ\xd0?\x1c\xd6\xbea\xed\x1b\xd6?\xc8S\x82<%\xc8\xd3?{\x14\xaeG\xe1z\x84?{\x14\xaeG\xe1z\x84?{\x14\xaeG\xe1z\x84?{\x14\xaeG\xe1z\x84?{\x14\xaeG\xe1z\x84?{\x14\xaeG\xe1z\x84?\xa0\x12\xe4)A\x9e\xa2?\xf0\x1b\xd6\xbea\xed\xab?\xa0\x12\xe4)A\x9e\xa2?{\x14\xaeG\xe1z\x84?{\x14\xaeG\xe1z\x84?{\x14\xaeG\xe1z\x84?{\x14\xaeG\xe1z\x84?\xa0\x12\xe4)A\x9e\x92?{\x14\xaeG\xe1z\x84?{\x14\xaeG\xe1z\x84?{\x14\xaeG\xe1z\x84?{\x14\xaeG\xe1z\x84?\x98\x99\x99\x99\x99\x99\xc9?\xf4\x94 O\t\xf2\xc4?\xf0\x1b\xd6\xbea\xed\xab?\xf0\x1b\xd6\xbea\xed\xbb?\xa0\x12\xe4)A\x9e\x92?{\x14\xaeG\xe1z\x84?\xf2\x94 O\t\xf2\xd4?t\xd1E\x17]t\xd1?L\x90\xa7\x04yJ\xc0?\xa0\x12\xe4)A\x9e\xb2?\xa0\x12\xe4)A\x9e\x92?{\x14\xaeG\xe1z\x84?{\x14\xaeG\xe1z\x84?{\x14\xaeG\xe1z\x84?{\x14\xaeG\xe1z\x84?{\x14\xaeG\xe1z\x84?{\x14\xaeG\xe1z\x84?{\x14\xaeG\xe1z\x84?{\x14\xaeG\xe1z\x84?{\x14\xaeG\xe1z\x84?{\x14\xaeG\xe1z\x84?{\x14\xaeG\xe1z\x84?{\x14\xaeG\xe1z\x84?{\x14\xaeG\xe1z\x84?\xa0\x12\xe4)A\x9e\x92?\xa0\x12\xe4)A\x9e\xb2?H\x17]t\xd1E\xb7?L\x90\xa7\x04yJ\xc0?\x98\x99\x99\x99\x99\x99\xc9?H\x17]t\xd1E\xb7?{\x14\xaeG\xe1z\x84?{\x14\xaeG\xe1z\x84?{\x14\xaeG\xe1z\x84?{\x14\xaeG\xe1z\x84?{\x14\xaeG\xe1z\x84?{\x14\xaeG\xe1z\x84?\xa0\x12\xe4)A\x9e\xa2?\xf0\x1b\xd6\xbea\xed\xab?\xa0\x12\xe4)A\x9e\xa2?{\x14\xaeG\xe1z\x84?{\x14\xaeG\xe1z\x84?{\x14\xaeG\xe1z\x84?{\x14\xaeG\xe1z\x84?\xa0\x12\xe4)A\x9e\x92?{\x14\xaeG\xe1z\x84?{\x14\xaeG\xe1z\x84?{\x14\xaeG\xe1z\x84?{\x14\xaeG\xe1z\x84?\x98\x99\x99\x99\x99\x99\xc9?\xf4\x94 O\t\xf2\xc4?\xa0\x12\xe4)A\x9e\xb2?\xf0\x1b\xd6\xbea\xed\xbb?\xa0\x12\xe4)A\x9e\xa2?{\x14\xaeG\xe1z\x84?\xf2\x94 O\t\xf2\xd4?\x98\x99\x99\x99\x99\x99\xc9?H\x17]t\xd1E\xb7?{\x14\xaeG\xe1z\x84?{\x14\xaeG\xe1z\x84?{\x14\xaeG\xe1z\x84?{\x14\xaeG\xe1z\x84?{\x14\xaeG\xe1z\x84?{\x14\xaeG\xe1z\x84?{\x14\xaeG\xe1z\x84?{\x14\xaeG\xe1z\x84?{\x14\xaeG\xe1z\x84?{\x14\xaeG\xe1z\x84?{\x14\xaeG\xe1z\x84?{\x14\xaeG\xe1z\x84?{\x14\xaeG\xe1z\x84?{\x14\xaeG\xe1z\x84?{\x14\xaeG\xe1z\x84?\xa0\x12\xe4)A\x9e\x92?\xa0\x12\xe4)A\x9e\xb2?\xf4\x94 O\t\xf2\xc4?\xf2\x94 O\t\xf2\xd4?\x9e\x12\xe4)A\x9e\xd2?\xf0\x1b\xd6\xbea\xed\xab?{\x14\xaeG\xe1z\x84?{\x14\xaeG\xe1z\x84?{\x14\xaeG\xe1z\x84?{\x14\xaeG\xe1z\x84?{\x14\xaeG\xe1z\x84?{\x14\xaeG\xe1z\x84?\xa0\x12\xe4)A\x9e\xa2?\xf0\x1b\xd6\xbea\xed\xab?\xa0\x12\xe4)A\x9e\xa2?{\x14\xaeG\xe1z\x84?{\x14\xaeG\xe1z\x84?{\x14\xaeG\xe1z\x84?{\x14\xaeG\xe1z\x84?\xa0\x12\xe4)A\x9e\x92?{\x14\xaeG\xe1z\x84?{\x14\xaeG\xe1z\x84?{\x14\xaeG\xe1z\x84?{\x14\xaeG\xe1z\x84?\x98\x99\x99\x99\x99\x99\xc9?\xa0\x12\xe4)A\x9e\xc2?\xa0\x12\xe4)A\x9e\xa2?H\x17]t\xd1E\xb7?{\x14\xaeG\xe1z\x84?{\x14\xaeG\xe1z\x84?\xf2\x94 O\t\xf2\xd4?@\x9e\x12\xe4)A\xce?D\x17]t\xd1E\xc7?H\x17]t\xd1E\xb7?\xa0\x12\xe4)A\x9e\xb2?\xa0\x12\xe4)A\x9e\xb2?{\x14\xaeG\xe1z\x84?{\x14\xaeG\xe1z\x84?{\x14\xaeG\xe1z\x84?{\x14\xaeG\xe1z\x84?\xa0\x12\xe4)A\x9e\x92?\xa0\x12\xe4)A\x9e\xb2?{\x14\xaeG\xe1z\x84?{\x14\xaeG\xe1z\x84?{\x14\xaeG\xe1z\x84?{\x14\xaeG\xe1z\x84?{\x14\xaeG\xe1z\x84?{\x14\xaeG\xe1z\x84?\xa0\x12\xe4)A\x9e\x92?\xf0\x1b\xd6\xbea\xed\xab?\xf0\x1b\xd6\xbea\xed\xbb?\xec\x1b\xd6\xbea\xed\xcb?\xa0\x12\xe4)A\x9e\xb2?{\x14\xaeG\xe1z\x84?{\x14\xaeG\xe1z\x84?{\x14\xaeG\xe1z\x84?{\x14\xaeG\xe1z\x84?{\x14\xaeG\xe1z\x84?{\x14\xaeG\xe1z\x84?{\x14\xaeG\xe1z\x84?\xa0\x12\xe4)A\x9e\xa2?\xa0\x12\xe4)A\x9e\xa2?{\x14\xaeG\xe1z\x84?{\x14\xaeG\xe1z\x84?{\x14\xaeG\xe1z\x84?{\x14\xaeG\xe1z\x84?{\x14\xaeG\xe1z\x84?{\x14\xaeG\xe1z\x84?{\x14\xaeG\xe1z\x84?{\x14\xaeG\xe1z\x84?{\x14\xaeG\xe1z\x84?{\x14\xaeG\xe1z\x84?\x98\x99\x99\x99\x99\x99\xc9?L\x90\xa7\x04yJ\xc0?\xa0\x12\xe4)A\x9e\xa2?\xa0\x12\xe4)A\x9e\xb2?\xf0\x1b\xd6\xbea\xed\xab?{\x14\xaeG\xe1z\x84?\xf2\x94 O\t\xf2\xd4?t\xd1E\x17]t\xd1?\x9e\x12\xe4)A\x9e\xd2?\x9e\x12\xe4)A\x9e\xd2?\xc8S\x82<%\xc8\xd3?t\xd1E\x17]t\xd1?{\x14\xaeG\xe1z\x84?{\x14\xaeG\xe1z\x84?{\x14\xaeG\xe1z\x84?{\x14\xaeG\xe1z\x84?\xa0\x12\xe4)A\x9e\x92?@\x9e\x12\xe4)A\xce?{\x14\xaeG\xe1z\x84?{\x14\xaeG\xe1z\x84?{\x14\xaeG\xe1z\x84?{\x14\xaeG\xe1z\x84?{\x14\xaeG\xe1z\x84?{\x14\xaeG\xe1z\x84?\xa0\x12\xe4)A\x9e\x92?\xf0\x1b\xd6\xbea\xed\xab?H\x17]t\xd1E\xb7?\xa0\x12\xe4)A\x9e\xc2?\xec\x1b\xd6\xbea\xed\xcb?\xa0\x12\xe4)A\x9e\xc2?{\x14\xaeG\xe1z\x84?{\x14\xaeG\xe1z\x84?\xf0\x1b\xd6\xbea\xed\xab?\xf0\x1b\xd6\xbea\xed\xab?\xf0\x1b\xd6\xbea\xed\xab?{\x14\xaeG\xe1z\x84?\xa0\x12\xe4)A\x9e\xa2?\xa0\x12\xe4)A\x9e\xa2?\xa0\x12\xe4)A\x9e\x92?{\x14\xaeG\xe1z\x84?{\x14\xaeG\xe1z\x84?{\x14\xaeG\xe1z\x84?{\x14\xaeG\xe1z\x84?\xa0\x12\xe4)A\x9e\x92?{\x14\xaeG\xe1z\x84?{\x14\xaeG\xe1z\x84?{\x14\xaeG\xe1z\x84?{\x14\xaeG\xe1z\x84?\x98\x99\x99\x99\x99\x99\xc9?D\x17]t\xd1E\xc7?H\x17]t\xd1E\xb7?H\x17]t\xd1E\xb7?\xf0\x1b\xd6\xbea\xed\xab?\xf0\x1b\xd6\xbea\xed\xab?\xf2\x94 O\t\xf2\xd4?\xc8S\x82<%\xc8\xd3?\x1c\xd6\xbea\xed\x1b\xd6?\xc8S\x82<%\xc8\xd3?\xc8S\x82<%\xc8\xd3?\xec\x1b\xd6\xbea\xed\xcb?{\x14\xaeG\xe1z\x84?{\x14\xaeG\xe1z\x84?{\x14\xaeG\xe1z\x84?{\x14\xaeG\xe1z\x84?{\x14\xaeG\xe1z\x84?{\x14\xaeG\xe1z\x84?{\x14\xaeG\xe1z\x84?{\x14\xaeG\xe1z\x84?{\x14\xaeG\xe1z\x84?{\x14\xaeG\xe1z\x84?{\x14\xaeG\xe1z\x84?{\x14\xaeG\xe1z\x84?\xa0\x12\xe4)A\x9e\x92?\xa0\x12\xe4)A\x9e\xa2?\xf0\x1b\xd6\xbea\xed\xab?\xa0\x12\xe4)A\x9e\xb2?H\x17]t\xd1E\xb7?\xf0\x1b\xd6\xbea\xed\xab?{\x14\xaeG\xe1z\x84?{\x14\xaeG\xe1z\x84?{\x14\xaeG\xe1z\x84?\xf0\x1b\xd6\xbea\xed\xab?\xa0\x12\xe4)A\x9e\xb2?\xf0\x1b\xd6\xbea\xed\xab?\xa0\x12\xe4)A\x9e\xa2?\xa0\x12\xe4)A\x9e\xa2?\xa0\x12\xe4)A\x9e\xa2?\xa0\x12\xe4)A\x9e\xa2?{\x14\xaeG\xe1z\x84?{\x14\xaeG\xe1z\x84?{\x14\xaeG\xe1z\x84?\xa0\x12\xe4)A\x9e\x92?\xa0\x12\xe4)A\x9e\x92?\xa0\x12\xe4)A\x9e\x92?{\x14\xaeG\xe1z\x84?{\x14\xaeG\xe1z\x84?\x98\x99\x99\x99\x99\x99\xc9?J\x90\xa7\x04yJ\xd0?\xec\x1b\xd6\xbea\xed\xcb?\x98\x99\x99\x99\x99\x99\xc9?\x98\x99\x99\x99\x99\x99\xc9?\x98\x99\x99\x99\x99\x99\xc9?\xf2\x94 O\t\xf2\xd4?t\xd1E\x17]t\xd1?F\x17]t\xd1E\xd7?\x9e\x12\xe4)A\x9e\xd2?\x9e\x12\xe4)A\x9e\xd2?\x98\x99\x99\x99\x99\x99\xc9?{\x14\xaeG\xe1z\x84?{\x14\xaeG\xe1z\x84?{\x14\xaeG\xe1z\x84?{\x14\xaeG\xe1z\x84?{\x14\xaeG\xe1z\x84?{\x14\xaeG\xe1z\x84?{\x14\xaeG\xe1z\x84?{\x14\xaeG\xe1z\x84?{\x14\xaeG\xe1z\x84?{\x14\xaeG\xe1z\x84?{\x14\xaeG\xe1z\x84?{\x14\xaeG\xe1z\x84?\xa0\x12\xe4)A\x9e\x92?\xa0\x12\xe4)A\x9e\xa2?\xf0\x1b\xd6\xbea\xed\xab?\xa0\x12\xe4)A\x9e\xa2?\xa0\x12\xe4)A\x9e\xa2?\xa0\x12\xe4)A\x9e\xa2?{\x14\xaeG\xe1z\x84?{\x14\xaeG\xe1z\x84?{\x14\xaeG\xe1z\x84?\xa0\x12\xe4)A\x9e\x92?\xa0\x12\xe4)A\x9e\xa2?\xf0\x1b\xd6\xbea\xed\xab?\xa0\x12\xe4)A\x9e\xa2?\xa0\x12\xe4)A\x9e\xa2?\xa0\x12\xe4)A\x9e\xa2?\xa0\x12\xe4)A\x9e\x92?{\x14\xaeG\xe1z\x84?{\x14\xaeG\xe1z\x84?{\x14\xaeG\xe1z\x84?\xa0\x12\xe4)A\x9e\x92?\xa0\x12\xe4)A\x9e\x92?\xa0\x12\xe4)A\x9e\x92?{\x14\xaeG\xe1z\x84?{\x14\xaeG\xe1z\x84?\x98\x99\x99\x99\x99\x99\xc9?J\x90\xa7\x04yJ\xd0?\xec\x1b\xd6\xbea\xed\xcb?\x98\x99\x99\x99\x99\x99\xc9?@\x9e\x12\xe4)A\xce?t\xd1E\x17]t\xd1?\xf2\x94 O\t\xf2\xd4?\x1c\xd6\xbea\xed\x1b\xd6?pX\xfb\x86\xb5o\xd8?\x1c\xd6\xbea\xed\x1b\xd6?\x1c\xd6\xbea\xed\x1b\xd6?\x1c\xd6\xbea\xed\x1b\xd6?{\x14\xaeG\xe1z\x84?{\x14\xaeG\xe1z\x84?{\x14\xaeG\xe1z\x84?{\x14\xaeG\xe1z\x84?{\x14\xaeG\xe1z\x84?{\x14\xaeG\xe1z\x84?{\x14\xaeG\xe1z\x84?{\x14\xaeG\xe1z\x84?{\x14\xaeG\xe1z\x84?{\x14\xaeG\xe1z\x84?\xa0\x12\xe4)A\x9e\x92?\xa0\x12\xe4)A\x9e\x92?\xa0\x12\xe4)A\x9e\x92?\xa0\x12\xe4)A\x9e\xa2?\xf0\x1b\xd6\xbea\xed\xab?\xf0\x1b\xd6\xbea\xed\xab?\xf0\x1b\xd6\xbea\xed\xab?\xf0\x1b\xd6\xbea\xed\xab?{\x14\xaeG\xe1z\x84?{\x14\xaeG\xe1z\x84?{\x14\xaeG\xe1z\x84?\xa0\x12\xe4)A\x9e\x92?\xf0\x1b\xd6\xbea\xed\xab?\xf0\x1b\xd6\xbea\xed\xab?\xa0\x12\xe4)A\x9e\xa2?\xa0\x12\xe4)A\x9e\xa2?\xa0\x12\xe4)A\x9e\xa2?\xa0\x12\xe4)A\x9e\xb2?\xf0\x1b\xd6\xbea\xed\xab?\xf0\x1b\xd6\xbea\xed\xab?{\x14\xaeG\xe1z\x84?\xa0\x12\xe4)A\x9e\x92?\xa0\x12\xe4)A\x9e\x92?\xa0\x12\xe4)A\x9e\xa2?\xa0\x12\xe4)A\x9e\xa2?\xa0\x12\xe4)A\x9e\x92?\x98\x99\x99\x99\x99\x99\xc9?J\x90\xa7\x04yJ\xd0?\xc8S\x82<%\xc8\xd3?t\xd1E\x17]t\xd1?J\x90\xa7\x04yJ\xd0?@\x9e\x12\xe4)A\xce?\xf2\x94 O\t\xf2\xd4?\x1c\xd6\xbea\xed\x1b\xd6?pX\xfb\x86\xb5o\xd8?pX\xfb\x86\xb5o\xd8?F\x17]t\xd1E\xd7?F\x17]t\xd1E\xd7?{\x14\xaeG\xe1z\x84?{\x14\xaeG\xe1z\x84?{\x14\xaeG\xe1z\x84?{\x14\xaeG\xe1z\x84?{\x14\xaeG\xe1z\x84?{\x14\xaeG\xe1z\x84?{\x14\xaeG\xe1z\x84?{\x14\xaeG\xe1z\x84?{\x14\xaeG\xe1z\x84?{\x14\xaeG\xe1z\x84?\xa0\x12\xe4)A\x9e\x92?\xa0\x12\xe4)A\x9e\x92?\xa0\x12\xe4)A\x9e\x92?\xa0\x12\xe4)A\x9e\xa2?\xf0\x1b\xd6\xbea\xed\xab?\xf0\x1b\xd6\xbea\xed\xab?\xf0\x1b\xd6\xbea\xed\xab?\xa0\x12\xe4)A\x9e\xb2?{\x14\xaeG\xe1z\x84?{\x14\xaeG\xe1z\x84?{\x14\xaeG\xe1z\x84?\xa0\x12\xe4)A\x9e\x92?\xf0\x1b\xd6\xbea\xed\xab?\xf0\x1b\xd6\xbea\xed\xab?\xa0\x12\xe4)A\x9e\xa2?\xa0\x12\xe4)A\x9e\xa2?\xa0\x12\xe4)A\x9e\xb2?\xf0\x1b\xd6\xbea\xed\xbb?L\x90\xa7\x04yJ\xc0?L\x90\xa7\x04yJ\xc0?{\x14\xaeG\xe1z\x84?\xa0\x12\xe4)A\x9e\x92?\xa0\x12\xe4)A\x9e\xa2?\xf0\x1b\xd6\xbea\xed\xab?\xf0\x1b\xd6\xbea\xed\xab?\xa0\x12\xe4)A\x9e\xb2?\x98\x99\x99\x99\x99\x99\xc9?t\xd1E\x17]t\xd1?\x1c\xd6\xbea\xed\x1b\xd6?F\x17]t\xd1E\xd7?\x1c\xd6\xbea\xed\x1b\xd6?pX\xfb\x86\xb5o\xd8?'
p20
tp21
bag1
(g2
(I0
tp22
g4
tp23
Rp24
(I1
(I2
I13
I8
I6
tp25
g11
I00
S'A\x9e\x12\xe4)A\xee?A\x9e\x12\xe4)A\xee?A\x9e\x12\xe4)A\xee?\xac}\xc3\xda7\xac\xed?\x82<%\xc8S\x82\xec?\x82<%\xc8S\x82\xec?\xed\x1b\xd6\xbea\xed\xab?\xed\x1b\xd6\xbea\xed\xab?\x9e\x12\xe4)A\x9e\xa2?\x9e\x12\xe4)A\x9e\x92?{\x14\xaeG\xe1z\x84?{\x14\xaeG\xe1z\x84?\xed\x1b\xd6\xbea\xed\xbb?\x9e\x12\xe4)A\x9e\xb2?\xed\x1b\xd6\xbea\xed\xab?\xed\x1b\xd6\xbea\xed\xab?\x9e\x12\xe4)A\x9e\xa2?\x9e\x12\xe4)A\x9e\x92?J\x90\xa7\x04yJ\xc0?J\x90\xa7\x04yJ\xc0?J\x90\xa7\x04yJ\xc0?J\x90\xa7\x04yJ\xc0?\x9e\x12\xe4)A\x9e\xc2?\xed\x1b\xd6\xbea\xed\xbb?F\x17]t\xd1E\xb7?\xed\x1b\xd6\xbea\xed\xbb?\xed\x1b\xd6\xbea\xed\xbb?\xf2\x94 O\t\xf2\xc4?\x9a\x99\x99\x99\x99\x99\xc9?\x9a\x99\x99\x99\x99\x99\xc9?\x9e\x12\xe4)A\x9e\xc2?F\x17]t\xd1E\xc7?J\x90\xa7\x04yJ\xd0?t\xd1E\x17]t\xd1?J\x90\xa7\x04yJ\xd0?J\x90\xa7\x04yJ\xd0?\x9e\x12\xe4)A\x9e\xb2?\x9e\x12\xe4)A\x9e\x92?\x9e\x12\xe4)A\x9e\x92?\x9e\x12\xe4)A\x9e\x92?{\x14\xaeG\xe1z\x84?{\x14\xaeG\xe1z\x84?\xc8S\x82<%\xc8\xe3?\x9e\x12\xe4)A\x9e\xe2?\xc8S\x82<%\xc8\xe3?\xdf\xb0\xf6\rk\xdf\xe0?k\xdf\xb0\xf6\rk\xdf?\xc3\xda7\xac}\xc3\xda?A\x9e\x12\xe4)A\xee?A\x9e\x12\xe4)A\xee?A\x9e\x12\xe4)A\xee?\x82<%\xc8S\x82\xec?\x17]t\xd1E\x17\xed?\x82<%\xc8S\x82\xec?\xed\x1b\xd6\xbea\xed\xab?\x9e\x12\xe4)A\x9e\xa2?\x9e\x12\xe4)A\x9e\x92?{\x14\xaeG\xe1z\x84?{\x14\xaeG\xe1z\x84?{\x14\xaeG\xe1z\x84?\xed\x1b\xd6\xbea\xed\xbb?\xed\x1b\xd6\xbea\xed\xab?\xed\x1b\xd6\xbea\xed\xab?\x9e\x12\xe4)A\x9e\xa2?\x9e\x12\xe4)A\x9e\xa2?\x9e\x12\xe4)A\x9e\xa2?J\x90\xa7\x04yJ\xc0?\xed\x1b\xd6\xbea\xed\xbb?J\x90\xa7\x04yJ\xc0?F\x17]t\xd1E\xb7?\xed\x1b\xd6\xbea\xed\xbb?\xed\x1b\xd6\xbea\xed\xbb?F\x17]t\xd1E\xb7?\xed\x1b\xd6\xbea\xed\xbb?\xed\x1b\xd6\xbea\xed\xcb?pX\xfb\x86\xb5o\xd8?\xc3\xda7\xac}\xc3\xda?k\xdf\xb0\xf6\rk\xdf?\x9e\x12\xe4)A\x9e\xc2?A\x9e\x12\xe4)A\xce?\xc8S\x82<%\xc8\xd3?\x9e\x12\xe4)A\x9e\xd2?\x9a\x99\x99\x99\x99\x99\xc9?\x9e\x12\xe4)A\x9e\xc2?\x9e\x12\xe4)A\x9e\xb2?\x9e\x12\xe4)A\x9e\x92?{\x14\xaeG\xe1z\x84?{\x14\xaeG\xe1z\x84?{\x14\xaeG\xe1z\x84?{\x14\xaeG\xe1z\x84?\xc8S\x82<%\xc8\xe3?\x87\xb5oX\xfb\x86\xe5?]t\xd1E\x17]\xe4?\t\xf2\x94 O\t\xe2?\t\xf2\x94 O\t\xe2?t\xd1E\x17]t\xe1?A\x9e\x12\xe4)A\xee?A\x9e\x12\xe4)A\xee?A\x9e\x12\xe4)A\xee?/\xba\xe8\xa2\x8b.\xea?\x05yJ\x90\xa7\x04\xe9?\xdb7\xac}\xc3\xda\xe7?\xed\x1b\xd6\xbea\xed\xab?\x9e\x12\xe4)A\x9e\xa2?\x9e\x12\xe4)A\x9e\xa2?\x9e\x12\xe4)A\x9e\x92?{\x14\xaeG\xe1z\x84?{\x14\xaeG\xe1z\x84?\xed\x1b\xd6\xbea\xed\xbb?F\x17]t\xd1E\xb7?\x9e\x12\xe4)A\x9e\xa2?\x9e\x12\xe4)A\x9e\x92?\x9e\x12\xe4)A\x9e\xa2?\xed\x1b\xd6\xbea\xed\xab?J\x90\xa7\x04yJ\xc0?J\x90\xa7\x04yJ\xc0?\x9e\x12\xe4)A\x9e\xb2?\xf2\x94 O\t\xf2\xc4?t\xd1E\x17]t\xd1?J\x90\xa7\x04yJ\xd0?F\x17]t\xd1E\xb7?J\x90\xa7\x04yJ\xc0?\x9a\x99\x99\x99\x99\x99\xc9?\xf2\x94 O\t\xf2\xd4?\x1c\xd6\xbea\xed\x1b\xd6?\xf2\x94 O\t\xf2\xd4?\x9e\x12\xe4)A\x9e\xc2?\x9a\x99\x99\x99\x99\x99\xc9?\x9e\x12\xe4)A\x9e\xd2?F\x17]t\xd1E\xb7?\x9e\x12\xe4)A\x9e\x92?{\x14\xaeG\xe1z\x84?\x9e\x12\xe4)A\x9e\xb2?\x9e\x12\xe4)A\x9e\x92?\x9e\x12\xe4)A\x9e\x92?\x9e\x12\xe4)A\x9e\x92?{\x14\xaeG\xe1z\x84?{\x14\xaeG\xe1z\x84?\xc8S\x82<%\xc8\xe3?\xc8S\x82<%\xc8\xe3?]t\xd1E\x17]\xe4?\xc3\xda7\xac}\xc3\xda?J\x90\xa7\x04yJ\xe0?t\xd1E\x17]t\xe1?A\x9e\x12\xe4)A\xee?A\x9e\x12\xe4)A\xee?A\x9e\x12\xe4)A\xee?\xed\x1b\xd6\xbea\xed\xeb?\xdb7\xac}\xc3\xda\xe7?\xf2\x94 O\t\xf2\xe4?\xed\x1b\xd6\xbea\xed\xab?\x9e\x12\xe4)A\x9e\x92?{\x14\xaeG\xe1z\x84?{\x14\xaeG\xe1z\x84?{\x14\xaeG\xe1z\x84?{\x14\xaeG\xe1z\x84?\xed\x1b\xd6\xbea\xed\xbb?\xed\x1b\xd6\xbea\xed\xab?\xed\x1b\xd6\xbea\xed\xab?J\x90\xa7\x04yJ\xc0?\xed\x1b\xd6\xbea\xed\xcb?t\xd1E\x17]t\xd1?J\x90\xa7\x04yJ\xc0?\x9e\x12\xe4)A\x9e\xc2?\xed\x1b\xd6\xbea\xed\xcb?\xf2\x94 O\t\xf2\xd4?\xdf\xb0\xf6\rk\xdf\xe0?\x9e\x12\xe4)A\x9e\xe2?F\x17]t\xd1E\xb7?J\x90\xa7\x04yJ\xd0?pX\xfb\x86\xb5o\xd8?\x9e\x12\xe4)A\x9e\xe2?\xc3\xda7\xac}\xc3\xea?A\x9e\x12\xe4)A\xee?\x9e\x12\xe4)A\x9e\xc2?t\xd1E\x17]t\xd1?\xc8S\x82<%\xc8\xd3?A\x9e\x12\xe4)A\xce?F\x17]t\xd1E\xb7?\x9e\x12\xe4)A\x9e\x92?\x9e\x12\xe4)A\x9e\xb2?\x9e\x12\xe4)A\x9e\x92?{\x14\xaeG\xe1z\x84?{\x14\xaeG\xe1z\x84?{\x14\xaeG\xe1z\x84?{\x14\xaeG\xe1z\x84?\xc8S\x82<%\xc8\xe3?\xf2\x94 O\t\xf2\xe4?\x9a\x99\x99\x99\x99\x99\xe9?\x82<%\xc8S\x82\xec?A\x9e\x12\xe4)A\xee?\xd6\xbea\xed\x1b\xd6\xee?A\x9e\x12\xe4)A\xee?A\x9e\x12\xe4)A\xee?\xac}\xc3\xda7\xac\xed?\xc3\xda7\xac}\xc3\xea?\x05yJ\x90\xa7\x04\xe9?\xb1\xf6\rk\xdf\xb0\xe6?\xed\x1b\xd6\xbea\xed\xab?\x9e\x12\xe4)A\x9e\xa2?{\x14\xaeG\xe1z\x84?{\x14\xaeG\xe1z\x84?{\x14\xaeG\xe1z\x84?{\x14\xaeG\xe1z\x84?\xed\x1b\xd6\xbea\xed\xbb?\x9e\x12\xe4)A\x9e\xc2?\x9e\x12\xe4)A\x9e\xc2?\x9e\x12\xe4)A\x9e\xc2?\x9a\x99\x99\x99\x99\x99\xc9?\xf2\x94 O\t\xf2\xd4?J\x90\xa7\x04yJ\xc0?\xf2\x94 O\t\xf2\xc4?pX\xfb\x86\xb5o\xd8?/\xba\xe8\xa2\x8b.\xea?\xd6\xbea\xed\x1b\xd6\xee?k\xdf\xb0\xf6\rk\xef?F\x17]t\xd1E\xb7?t\xd1E\x17]t\xd1?\xdf\xb0\xf6\rk\xdf\xe0?\xb1\xf6\rk\xdf\xb0\xe6?\xed\x1b\xd6\xbea\xed\xeb?\xed\x1b\xd6\xbea\xed\xeb?\x9e\x12\xe4)A\x9e\xc2?F\x17]t\xd1E\xc7?J\x90\xa7\x04yJ\xd0?J\x90\xa7\x04yJ\xc0?\x9e\x12\xe4)A\x9e\xa2?\x9e\x12\xe4)A\x9e\xa2?\x9e\x12\xe4)A\x9e\xb2?\x9e\x12\xe4)A\x9e\x92?{\x14\xaeG\xe1z\x84?{\x14\xaeG\xe1z\x84?{\x14\xaeG\xe1z\x84?{\x14\xaeG\xe1z\x84?\xc8S\x82<%\xc8\xe3?\xb1\xf6\rk\xdf\xb0\xe6?X\xfb\x86\xb5oX\xeb?\x17]t\xd1E\x17\xed?\xd6\xbea\xed\x1b\xd6\xee?\xd6\xbea\xed\x1b\xd6\xee?A\x9e\x12\xe4)A\xee?A\x9e\x12\xe4)A\xee?A\x9e\x12\xe4)A\xee?\x17]t\xd1E\x17\xed?\x82<%\xc8S\x82\xec?F\x17]t\xd1E\xe7?\xed\x1b\xd6\xbea\xed\xab?\x9e\x12\xe4)A\x9e\xa2?\x9e\x12\xe4)A\x9e\x92?{\x14\xaeG\xe1z\x84?{\x14\xaeG\xe1z\x84?{\x14\xaeG\xe1z\x84?\xed\x1b\xd6\xbea\xed\xbb?J\x90\xa7\x04yJ\xc0?J\x90\xa7\x04yJ\xc0?\xed\x1b\xd6\xbea\xed\xbb?\xf2\x94 O\t\xf2\xc4?J\x90\xa7\x04yJ\xd0?J\x90\xa7\x04yJ\xc0?\x9a\x99\x99\x99\x99\x99\xc9?\xc3\xda7\xac}\xc3\xda?\xdb7\xac}\xc3\xda\xe7?\xd6\xbea\xed\x1b\xd6\xee?\xaeG\xe1z\x14\xae\xef?F\x17]t\xd1E\xb7?J\x90\xa7\x04yJ\xd0?pX\xfb\x86\xb5o\xd8?]t\xd1E\x17]\xe4?pX\xfb\x86\xb5o\xe8?/\xba\xe8\xa2\x8b.\xea?\x9e\x12\xe4)A\x9e\xc2?J\x90\xa7\x04yJ\xd0?\x1c\xd6\xbea\xed\x1b\xd6?\x1c\xd6\xbea\xed\x1b\xd6?F\x17]t\xd1E\xc7?F\x17]t\xd1E\xb7?\x9e\x12\xe4)A\x9e\xb2?\x9e\x12\xe4)A\x9e\x92?\x9e\x12\xe4)A\x9e\x92?{\x14\xaeG\xe1z\x84?{\x14\xaeG\xe1z\x84?{\x14\xaeG\xe1z\x84?\xc8S\x82<%\xc8\xe3?\xb1\xf6\rk\xdf\xb0\xe6?\x05yJ\x90\xa7\x04\xe9?\xac}\xc3\xda7\xac\xed?A\x9e\x12\xe4)A\xee?\xd6\xbea\xed\x1b\xd6\xee?A\x9e\x12\xe4)A\xee?\xd6\xbea\xed\x1b\xd6\xee?\xd6\xbea\xed\x1b\xd6\xee?\xd6\xbea\xed\x1b\xd6\xee?A\x9e\x12\xe4)A\xee?\xd6\xbea\xed\x1b\xd6\xee?\xed\x1b\xd6\xbea\xed\xab?\x9e\x12\xe4)A\x9e\xa2?\x9e\x12\xe4)A\x9e\x92?\x9e\x12\xe4)A\x9e\x92?\x9e\x12\xe4)A\x9e\x92?{\x14\xaeG\xe1z\x84?\xed\x1b\xd6\xbea\xed\xbb?J\x90\xa7\x04yJ\xc0?J\x90\xa7\x04yJ\xc0?\xf2\x94 O\t\xf2\xc4?F\x17]t\xd1E\xc7?A\x9e\x12\xe4)A\xce?J\x90\xa7\x04yJ\xc0?\x9a\x99\x99\x99\x99\x99\xc9?\x9a\x99\x99\x99\x99\x99\xd9?]t\xd1E\x17]\xe4?\x05yJ\x90\xa7\x04\xe9?X\xfb\x86\xb5oX\xeb?F\x17]t\xd1E\xb7?F\x17]t\xd1E\xc7?\xed\x1b\xd6\xbea\xed\xcb?\x9e\x12\xe4)A\x9e\xd2?F\x17]t\xd1E\xd7?\xc3\xda7\xac}\xc3\xda?\x9e\x12\xe4)A\x9e\xc2?\xf2\x94 O\t\xf2\xc4?J\x90\xa7\x04yJ\xd0?\x9e\x12\xe4)A\x9e\xd2?\x9a\x99\x99\x99\x99\x99\xc9?\xf2\x94 O\t\xf2\xc4?\x9e\x12\xe4)A\x9e\xb2?\x9e\x12\xe4)A\x9e\x92?\x9e\x12\xe4)A\x9e\x92?\x9e\x12\xe4)A\x9e\x92?\x9e\x12\xe4)A\x9e\xa2?\x9e\x12\xe4)A\x9e\xa2?\xc8S\x82<%\xc8\xe3?\xf2\x94 O\t\xf2\xe4?\xdb7\xac}\xc3\xda\xe7?\x05yJ\x90\xa7\x04\xe9?/\xba\xe8\xa2\x8b.\xea?\x82<%\xc8S\x82\xec?A\x9e\x12\xe4)A\xee?\xd6\xbea\xed\x1b\xd6\xee?\xd6\xbea\xed\x1b\xd6\xee?\xd6\xbea\xed\x1b\xd6\xee?\xd6\xbea\xed\x1b\xd6\xee?\xd6\xbea\xed\x1b\xd6\xee?\xed\x1b\xd6\xbea\xed\xab?\xed\x1b\xd6\xbea\xed\xab?\x9e\x12\xe4)A\x9e\xb2?\x9e\x12\xe4)A\x9e\xb2?\x9e\x12\xe4)A\x9e\xa2?\x9e\x12\xe4)A\x9e\xa2?\xed\x1b\xd6\xbea\xed\xbb?\x9e\x12\xe4)A\x9e\xc2?\x9e\x12\xe4)A\x9e\xc2?F\x17]t\xd1E\xc7?\xf2\x94 O\t\xf2\xc4?J\x90\xa7\x04yJ\xc0?J\x90\xa7\x04yJ\xc0?\x9a\x99\x99\x99\x99\x99\xc9?\x9a\x99\x99\x99\x99\x99\xd9?]t\xd1E\x17]\xe4?\xd6\xbea\xed\x1b\xd6\xee?\xaeG\xe1z\x14\xae\xef?F\x17]t\xd1E\xb7?\x9a\x99\x99\x99\x99\x99\xc9?J\x90\xa7\x04yJ\xd0?\xdf\xb0\xf6\rk\xdf\xe0?pX\xfb\x86\xb5o\xe8?k\xdf\xb0\xf6\rk\xef?\x9e\x12\xe4)A\x9e\xc2?\xed\x1b\xd6\xbea\xed\xbb?\xed\x1b\xd6\xbea\xed\xbb?\xed\x1b\xd6\xbea\xed\xab?\xed\x1b\xd6\xbea\xed\xab?\x9e\x12\xe4)A\x9e\x92?\x9e\x12\xe4)A\x9e\xb2?\x9e\x12\xe4)A\x9e\x92?\x9e\x12\xe4)A\x9e\x92?\x9e\x12\xe4)A\x9e\x92?{\x14\xaeG\xe1z\x84?\x9e\x12\xe4)A\x9e\x92?\xc8S\x82<%\xc8\xe3?\x87\xb5oX\xfb\x86\xe5?\x17]t\xd1E\x17\xed?A\x9e\x12\xe4)A\xee?\xd6\xbea\xed\x1b\xd6\xee?k\xdf\xb0\xf6\rk\xef?A\x9e\x12\xe4)A\xee?\xd6\xbea\xed\x1b\xd6\xee?k\xdf\xb0\xf6\rk\xef?k\xdf\xb0\xf6\rk\xef?k\xdf\xb0\xf6\rk\xef?k\xdf\xb0\xf6\rk\xef?\xed\x1b\xd6\xbea\xed\xab?\x9e\x12\xe4)A\x9e\xc2?\xed\x1b\xd6\xbea\xed\xcb?F\x17]t\xd1E\xd7?t\xd1E\x17]t\xe1?333333\xe3?\xed\x1b\xd6\xbea\xed\xbb?\x9e\x12\xe4)A\x9e\xc2?\x9a\x99\x99\x99\x99\x99\xc9?A\x9e\x12\xe4)A\xce?J\x90\xa7\x04yJ\xd0?J\x90\xa7\x04yJ\xd0?J\x90\xa7\x04yJ\xc0?t\xd1E\x17]t\xd1?333333\xe3?\x9a\x99\x99\x99\x99\x99\xe9?\x17]t\xd1E\x17\xed?\xd6\xbea\xed\x1b\xd6\xee?F\x17]t\xd1E\xb7?\xf2\x94 O\t\xf2\xd4?333333\xe3?/\xba\xe8\xa2\x8b.\xea?\xd6\xbea\xed\x1b\xd6\xee?\xaeG\xe1z\x14\xae\xef?\x9e\x12\xe4)A\x9e\xc2?\x9a\x99\x99\x99\x99\x99\xc9?\xc8S\x82<%\xc8\xd3?F\x17]t\xd1E\xd7?\xc3\xda7\xac}\xc3\xda?\x9a\x99\x99\x99\x99\x99\xd9?\x9e\x12\xe4)A\x9e\xb2?\xed\x1b\xd6\xbea\xed\xab?\x9e\x12\xe4)A\x9e\xa2?\xed\x1b\xd6\xbea\xed\xab?\xed\x1b\xd6\xbea\xed\xab?\x9e\x12\xe4)A\x9e\xa2?\xc8S\x82<%\xc8\xe3?\x87\xb5oX\xfb\x86\xe5?\xdb7\xac}\xc3\xda\xe7?\x9a\x99\x99\x99\x99\x99\xe9?\xed\x1b\xd6\xbea\xed\xeb?\xac}\xc3\xda7\xac\xed?A\x9e\x12\xe4)A\xee?k\xdf\xb0\xf6\rk\xef?k\xdf\xb0\xf6\rk\xef?\xaeG\xe1z\x14\xae\xef?\xaeG\xe1z\x14\xae\xef?\xaeG\xe1z\x14\xae\xef?\xed\x1b\xd6\xbea\xed\xab?\xf2\x94 O\t\xf2\xc4?\x9a\x99\x99\x99\x99\x99\xd9?333333\xe3?pX\xfb\x86\xb5o\xe8?\x17]t\xd1E\x17\xed?\xed\x1b\xd6\xbea\xed\xbb?\x9e\x12\xe4)A\x9e\xc2?F\x17]t\xd1E\xc7?\xc8S\x82<%\xc8\xd3?\x9a\x99\x99\x99\x99\x99\xd9?k\xdf\xb0\xf6\rk\xdf?J\x90\xa7\x04yJ\xc0?t\xd1E\x17]t\xd1?333333\xe3?\x05yJ\x90\xa7\x04\xe9?\xac}\xc3\xda7\xac\xed?\xaeG\xe1z\x14\xae\xef?F\x17]t\xd1E\xb7?F\x17]t\xd1E\xd7?\x87\xb5oX\xfb\x86\xe5?A\x9e\x12\xe4)A\xee?\xaeG\xe1z\x14\xae\xef?\xaeG\xe1z\x14\xae\xef?\x9e\x12\xe4)A\x9e\xc2?\xed\x1b\xd6\xbea\xed\xcb?J\x90\xa7\x04yJ\xd0?pX\xfb\x86\xb5o\xd8?\x17]t\xd1E\x17\xdd?J\x90\xa7\x04yJ\xe0?\x9e\x12\xe4)A\x9e\xb2?F\x17]t\xd1E\xb7?\x9e\x12\xe4)A\x9e\xc2?F\x17]t\xd1E\xc7?\xf2\x94 O\t\xf2\xd4?pX\xfb\x86\xb5o\xd8?\xc8S\x82<%\xc8\xe3?\x1c\xd6\xbea\xed\x1b\xe6?\xc3\xda7\xac}\xc3\xea?\xac}\xc3\xda7\xac\xed?\xac}\xc3\xda7\xac\xed?\xac}\xc3\xda7\xac\xed?A\x9e\x12\xe4)A\xee?\xd6\xbea\xed\x1b\xd6\xee?k\xdf\xb0\xf6\rk\xef?k\xdf\xb0\xf6\rk\xef?\xaeG\xe1z\x14\xae\xef?\xaeG\xe1z\x14\xae\xef?\xed\x1b\xd6\xbea\xed\xab?J\x90\xa7\x04yJ\xc0?\x9a\x99\x99\x99\x99\x99\xc9?\x9e\x12\xe4)A\x9e\xd2?\xc3\xda7\xac}\xc3\xda?J\x90\xa7\x04yJ\xe0?\xed\x1b\xd6\xbea\xed\xbb?F\x17]t\xd1E\xb7?J\x90\xa7\x04yJ\xc0?\xf2\x94 O\t\xf2\xc4?A\x9e\x12\xe4)A\xce?J\x90\xa7\x04yJ\xd0?J\x90\xa7\x04yJ\xc0?\x9e\x12\xe4)A\x9e\xd2?\x87\xb5oX\xfb\x86\xe5?\x17]t\xd1E\x17\xed?\xd6\xbea\xed\x1b\xd6\xee?\xd6\xbea\xed\x1b\xd6\xee?F\x17]t\xd1E\xb7?J\x90\xa7\x04yJ\xe0?\xed\x1b\xd6\xbea\xed\xeb?\xaeG\xe1z\x14\xae\xef?\xaeG\xe1z\x14\xae\xef?\xaeG\xe1z\x14\xae\xef?\x9e\x12\xe4)A\x9e\xc2?t\xd1E\x17]t\xd1?\xed\x1b\xd6\xbea\xed\xdb?t\xd1E\x17]t\xe1?\xf2\x94 O\t\xf2\xe4?\xdb7\xac}\xc3\xda\xe7?\x9e\x12\xe4)A\x9e\xb2?J\x90\xa7\x04yJ\xc0?J\x90\xa7\x04yJ\xd0?\x9a\x99\x99\x99\x99\x99\xd9?J\x90\xa7\x04yJ\xe0?\xf2\x94 O\t\xf2\xe4?\xc8S\x82<%\xc8\xe3?\x87\xb5oX\xfb\x86\xe5?/\xba\xe8\xa2\x8b.\xea?A\x9e\x12\xe4)A\xee?k\xdf\xb0\xf6\rk\xef?\xaeG\xe1z\x14\xae\xef?A\x9e\x12\xe4)A\xee?k\xdf\xb0\xf6\rk\xef?k\xdf\xb0\xf6\rk\xef?\xaeG\xe1z\x14\xae\xef?\xaeG\xe1z\x14\xae\xef?\xaeG\xe1z\x14\xae\xef?\xed\x1b\xd6\xbea\xed\xab?F\x17]t\xd1E\xc7?\x17]t\xd1E\x17\xdd?\x05yJ\x90\xa7\x04\xe9?\x17]t\xd1E\x17\xed?k\xdf\xb0\xf6\rk\xef?\xed\x1b\xd6\xbea\xed\xbb?\x9e\x12\xe4)A\x9e\xc2?\x9a\x99\x99\x99\x99\x99\xc9?t\xd1E\x17]t\xd1?\xed\x1b\xd6\xbea\xed\xdb?\xdf\xb0\xf6\rk\xdf\xe0?J\x90\xa7\x04yJ\xc0?pX\xfb\x86\xb5o\xd8?\x1c\xd6\xbea\xed\x1b\xe6?\xac}\xc3\xda7\xac\xed?\xaeG\xe1z\x14\xae\xef?\xaeG\xe1z\x14\xae\xef?F\x17]t\xd1E\xb7?\x17]t\xd1E\x17\xdd?\x9a\x99\x99\x99\x99\x99\xe9?\xaeG\xe1z\x14\xae\xef?\xaeG\xe1z\x14\xae\xef?\xaeG\xe1z\x14\xae\xef?\x9e\x12\xe4)A\x9e\xc2?A\x9e\x12\xe4)A\xce?\x17]t\xd1E\x17\xdd?\xdf\xb0\xf6\rk\xdf\xe0?\x1c\xd6\xbea\xed\x1b\xe6?\xdb7\xac}\xc3\xda\xe7?\x9e\x12\xe4)A\x9e\xb2?\x9e\x12\xe4)A\x9e\xc2?\x1c\xd6\xbea\xed\x1b\xd6?t\xd1E\x17]t\xe1?\x05yJ\x90\xa7\x04\xe9?\x82<%\xc8S\x82\xec?\xc8S\x82<%\xc8\xe3?\xdb7\xac}\xc3\xda\xe7?\x82<%\xc8S\x82\xec?A\x9e\x12\xe4)A\xee?\xd6\xbea\xed\x1b\xd6\xee?\xd6\xbea\xed\x1b\xd6\xee?A\x9e\x12\xe4)A\xee?k\xdf\xb0\xf6\rk\xef?k\xdf\xb0\xf6\rk\xef?k\xdf\xb0\xf6\rk\xef?\xaeG\xe1z\x14\xae\xef?\xaeG\xe1z\x14\xae\xef?\xed\x1b\xd6\xbea\xed\xab?J\x90\xa7\x04yJ\xc0?J\x90\xa7\x04yJ\xd0?\xed\x1b\xd6\xbea\xed\xdb?J\x90\xa7\x04yJ\xe0?pX\xfb\x86\xb5o\xe8?\xed\x1b\xd6\xbea\xed\xbb?\x9e\x12\xe4)A\x9e\xc2?\x9a\x99\x99\x99\x99\x99\xc9?J\x90\xa7\x04yJ\xd0?\xf2\x94 O\t\xf2\xd4?\x17]t\xd1E\x17\xdd?J\x90\xa7\x04yJ\xc0?\xed\x1b\xd6\xbea\xed\xcb?A\x9e\x12\xe4)A\xde?\xb1\xf6\rk\xdf\xb0\xe6?\xed\x1b\xd6\xbea\xed\xeb?A\x9e\x12\xe4)A\xee?F\x17]t\xd1E\xb7?\xf2\x94 O\t\xf2\xd4?\x9e\x12\xe4)A\x9e\xe2?/\xba\xe8\xa2\x8b.\xea?A\x9e\x12\xe4)A\xee?\xaeG\xe1z\x14\xae\xef?\x9e\x12\xe4)A\x9e\xc2?t\xd1E\x17]t\xd1?\x9a\x99\x99\x99\x99\x99\xd9?t\xd1E\x17]t\xe1?\xb1\xf6\rk\xdf\xb0\xe6?\x9a\x99\x99\x99\x99\x99\xe9?\x9e\x12\xe4)A\x9e\xb2?\x9e\x12\xe4)A\x9e\xc2?\xc8S\x82<%\xc8\xd3?\xdf\xb0\xf6\rk\xdf\xe0?pX\xfb\x86\xb5o\xe8?\xac}\xc3\xda7\xac\xed?\xc8S\x82<%\xc8\xe3?\xf2\x94 O\t\xf2\xe4?\x05yJ\x90\xa7\x04\xe9?\x82<%\xc8S\x82\xec?\xd6\xbea\xed\x1b\xd6\xee?\xaeG\xe1z\x14\xae\xef?\xf2\x94 O\t\xf2\xd4?\xf2\x94 O\t\xf2\xd4?F\x17]t\xd1E\xd7?pX\xfb\x86\xb5o\xd8?pX\xfb\x86\xb5o\xd8?\x9a\x99\x99\x99\x99\x99\xd9?{\x14\xaeG\xe1z\x84?{\x14\xaeG\xe1z\x84?{\x14\xaeG\xe1z\x84?{\x14\xaeG\xe1z\x84?{\x14\xaeG\xe1z\x84?{\x14\xaeG\xe1z\x84?{\x14\xaeG\xe1z\x84?{\x14\xaeG\xe1z\x84?{\x14\xaeG\xe1z\x84?{\x14\xaeG\xe1z\x84?{\x14\xaeG\xe1z\x84?{\x14\xaeG\xe1z\x84?\xa0\x12\xe4)A\x9e\x92?\xa0\x12\xe4)A\x9e\xa2?\xf0\x1b\xd6\xbea\xed\xab?\xf0\x1b\xd6\xbea\xed\xab?\xf0\x1b\xd6\xbea\xed\xab?\xa0\x12\xe4)A\x9e\xa2?{\x14\xaeG\xe1z\x84?{\x14\xaeG\xe1z\x84?{\x14\xaeG\xe1z\x84?{\x14\xaeG\xe1z\x84?\xa0\x12\xe4)A\x9e\xa2?\xa0\x12\xe4)A\x9e\xa2?\xa0\x12\xe4)A\x9e\xa2?\xa0\x12\xe4)A\x9e\xa2?H\x17]t\xd1E\xb7?\xf0\x1b\xd6\xbea\xed\xbb?L\x90\xa7\x04yJ\xc0?\xa0\x12\xe4)A\x9e\xc2?{\x14\xaeG\xe1z\x84?{\x14\xaeG\xe1z\x84?{\x14\xaeG\xe1z\x84?{\x14\xaeG\xe1z\x84?{\x14\xaeG\xe1z\x84?{\x14\xaeG\xe1z\x84?\x98\x99\x99\x99\x99\x99\xc9?\xec\x1b\xd6\xbea\xed\xcb?D\x17]t\xd1E\xc7?\xa0\x12\xe4)A\x9e\xc2?\xa0\x12\xe4)A\x9e\xc2?L\x90\xa7\x04yJ\xc0?\xf2\x94 O\t\xf2\xd4?\xf2\x94 O\t\xf2\xd4?\xf2\x94 O\t\xf2\xd4?pX\xfb\x86\xb5o\xd8?F\x17]t\xd1E\xd7?\x1c\xd6\xbea\xed\x1b\xd6?{\x14\xaeG\xe1z\x84?{\x14\xaeG\xe1z\x84?{\x14\xaeG\xe1z\x84?{\x14\xaeG\xe1z\x84?{\x14\xaeG\xe1z\x84?{\x14\xaeG\xe1z\x84?{\x14\xaeG\xe1z\x84?{\x14\xaeG\xe1z\x84?{\x14\xaeG\xe1z\x84?{\x14\xaeG\xe1z\x84?{\x14\xaeG\xe1z\x84?{\x14\xaeG\xe1z\x84?\xa0\x12\xe4)A\x9e\x92?\xf0\x1b\xd6\xbea\xed\xab?\xf0\x1b\xd6\xbea\xed\xab?\xa0\x12\xe4)A\x9e\xa2?\xf0\x1b\xd6\xbea\xed\xab?\xf0\x1b\xd6\xbea\xed\xab?{\x14\xaeG\xe1z\x84?{\x14\xaeG\xe1z\x84?{\x14\xaeG\xe1z\x84?\xf0\x1b\xd6\xbea\xed\xab?\xa0\x12\xe4)A\x9e\xb2?\xf0\x1b\xd6\xbea\xed\xbb?\xa0\x12\xe4)A\x9e\xa2?\xa0\x12\xe4)A\x9e\xb2?\xf0\x1b\xd6\xbea\xed\xbb?\xa0\x12\xe4)A\x9e\xc2?D\x17]t\xd1E\xc7?H\x17]t\xd1E\xb7?{\x14\xaeG\xe1z\x84?{\x14\xaeG\xe1z\x84?{\x14\xaeG\xe1z\x84?{\x14\xaeG\xe1z\x84?{\x14\xaeG\xe1z\x84?{\x14\xaeG\xe1z\x84?\x98\x99\x99\x99\x99\x99\xc9?@\x9e\x12\xe4)A\xce?D\x17]t\xd1E\xc7?D\x17]t\xd1E\xc7?\xf0\x1b\xd6\xbea\xed\xbb?\xa0\x12\xe4)A\x9e\xc2?\xf2\x94 O\t\xf2\xd4?F\x17]t\xd1E\xd7?\xc4\xda7\xac}\xc3\xda?J\x90\xa7\x04yJ\xd0?J\x90\xa7\x04yJ\xd0?t\xd1E\x17]t\xd1?{\x14\xaeG\xe1z\x84?{\x14\xaeG\xe1z\x84?{\x14\xaeG\xe1z\x84?{\x14\xaeG\xe1z\x84?{\x14\xaeG\xe1z\x84?{\x14\xaeG\xe1z\x84?{\x14\xaeG\xe1z\x84?{\x14\xaeG\xe1z\x84?{\x14\xaeG\xe1z\x84?{\x14\xaeG\xe1z\x84?{\x14\xaeG\xe1z\x84?{\x14\xaeG\xe1z\x84?\xa0\x12\xe4)A\x9e\x92?{\x14\xaeG\xe1z\x84?{\x14\xaeG\xe1z\x84?\xf0\x1b\xd6\xbea\xed\xab?D\x17]t\xd1E\xc7?\xf0\x1b\xd6\xbea\xed\xbb?{\x14\xaeG\xe1z\x84?{\x14\xaeG\xe1z\x84?{\x14\xaeG\xe1z\x84?{\x14\xaeG\xe1z\x84?\xa0\x12\xe4)A\x9e\x92?\xa0\x12\xe4)A\x9e\x92?\xa0\x12\xe4)A\x9e\xa2?\xa0\x12\xe4)A\x9e\xa2?H\x17]t\xd1E\xb7?{\x14\xaeG\xe1z\x84?{\x14\xaeG\xe1z\x84?{\x14\xaeG\xe1z\x84?{\x14\xaeG\xe1z\x84?{\x14\xaeG\xe1z\x84?{\x14\xaeG\xe1z\x84?{\x14\xaeG\xe1z\x84?{\x14\xaeG\xe1z\x84?{\x14\xaeG\xe1z\x84?\x98\x99\x99\x99\x99\x99\xc9?\xec\x1b\xd6\xbea\xed\xcb?\xec\x1b\xd6\xbea\xed\xcb?L\x90\xa7\x04yJ\xc0?\xf4\x94 O\t\xf2\xc4?\xf4\x94 O\t\xf2\xc4?\xf2\x94 O\t\xf2\xd4?\xc4\xda7\xac}\xc3\xda?\x18]t\xd1E\x17\xdd?\xee\x1b\xd6\xbea\xed\xdb?t\xd1E\x17]t\xd1?\xf0\x1b\xd6\xbea\xed\xbb?{\x14\xaeG\xe1z\x84?{\x14\xaeG\xe1z\x84?{\x14\xaeG\xe1z\x84?{\x14\xaeG\xe1z\x84?{\x14\xaeG\xe1z\x84?{\x14\xaeG\xe1z\x84?{\x14\xaeG\xe1z\x84?{\x14\xaeG\xe1z\x84?\xa0\x12\xe4)A\x9e\x92?\xa0\x12\xe4)A\x9e\xa2?\xa0\x12\xe4)A\x9e\xb2?H\x17]t\xd1E\xb7?\xa0\x12\xe4)A\x9e\x92?\xf0\x1b\xd6\xbea\xed\xab?\xa0\x12\xe4)A\x9e\xb2?\xf0\x1b\xd6\xbea\xed\xbb?\x98\x99\x99\x99\x99\x99\xc9?\x9e\x12\xe4)A\x9e\xd2?{\x14\xaeG\xe1z\x84?{\x14\xaeG\xe1z\x84?\xa0\x12\xe4)A\x9e\xb2?@\x9e\x12\xe4)A\xce?\x9a\x99\x99\x99\x99\x99\xd9?\xc8S\x82<%\xc8\xe3?\xa0\x12\xe4)A\x9e\xa2?H\x17]t\xd1E\xb7?\xf0\x1b\xd6\xbea\xed\xbb?\xa0\x12\xe4)A\x9e\xa2?\xa0\x12\xe4)A\x9e\x92?{\x14\xaeG\xe1z\x84?{\x14\xaeG\xe1z\x84?{\x14\xaeG\xe1z\x84?{\x14\xaeG\xe1z\x84?{\x14\xaeG\xe1z\x84?{\x14\xaeG\xe1z\x84?{\x14\xaeG\xe1z\x84?\x98\x99\x99\x99\x99\x99\xc9?J\x90\xa7\x04yJ\xd0?\xc8S\x82<%\xc8\xd3?\xc4\xda7\xac}\xc3\xda?J\x90\xa7\x04yJ\xe0?F\x17]t\xd1E\xe7?\xf2\x94 O\t\xf2\xd4?l\xdf\xb0\xf6\rk\xdf?B\x9e\x12\xe4)A\xde?F\x17]t\xd1E\xd7?\xc8S\x82<%\xc8\xd3?J\x90\xa7\x04yJ\xd0?{\x14\xaeG\xe1z\x84?{\x14\xaeG\xe1z\x84?{\x14\xaeG\xe1z\x84?{\x14\xaeG\xe1z\x84?{\x14\xaeG\xe1z\x84?{\x14\xaeG\xe1z\x84?{\x14\xaeG\xe1z\x84?{\x14\xaeG\xe1z\x84?\xa0\x12\xe4)A\x9e\x92?\xa0\x12\xe4)A\x9e\xa2?\xa0\x12\xe4)A\x9e\xb2?H\x17]t\xd1E\xb7?\xa0\x12\xe4)A\x9e\x92?\xf0\x1b\xd6\xbea\xed\xab?L\x90\xa7\x04yJ\xc0?\x9a\x99\x99\x99\x99\x99\xd9?]t\xd1E\x17]\xe4?X\xfb\x86\xb5oX\xeb?{\x14\xaeG\xe1z\x84?{\x14\xaeG\xe1z\x84?H\x17]t\xd1E\xb7?\xec\x1b\xd6\xbea\xed\xcb?J\x90\xa7\x04yJ\xd0?\xc8S\x82<%\xc8\xd3?\xa0\x12\xe4)A\x9e\xa2?\xf0\x1b\xd6\xbea\xed\xab?H\x17]t\xd1E\xb7?\xa0\x12\xe4)A\x9e\xa2?{\x14\xaeG\xe1z\x84?{\x14\xaeG\xe1z\x84?{\x14\xaeG\xe1z\x84?{\x14\xaeG\xe1z\x84?{\x14\xaeG\xe1z\x84?{\x14\xaeG\xe1z\x84?{\x14\xaeG\xe1z\x84?{\x14\xaeG\xe1z\x84?\x98\x99\x99\x99\x99\x99\xc9?t\xd1E\x17]t\xd1?\x9e\x12\xe4)A\x9e\xd2?\x1c\xd6\xbea\xed\x1b\xd6?\xc4\xda7\xac}\xc3\xda?B\x9e\x12\xe4)A\xde?\xf2\x94 O\t\xf2\xd4?l\xdf\xb0\xf6\rk\xdf?l\xdf\xb0\xf6\rk\xdf?\xee\x1b\xd6\xbea\xed\xdb?pX\xfb\x86\xb5o\xd8?\xf2\x94 O\t\xf2\xd4?{\x14\xaeG\xe1z\x84?{\x14\xaeG\xe1z\x84?{\x14\xaeG\xe1z\x84?{\x14\xaeG\xe1z\x84?{\x14\xaeG\xe1z\x84?{\x14\xaeG\xe1z\x84?{\x14\xaeG\xe1z\x84?{\x14\xaeG\xe1z\x84?\xa0\x12\xe4)A\x9e\x92?\xa0\x12\xe4)A\x9e\x92?\xa0\x12\xe4)A\x9e\xa2?\xa0\x12\xe4)A\x9e\xa2?\xa0\x12\xe4)A\x9e\x92?\xf0\x1b\xd6\xbea\xed\xab?\xf0\x1b\xd6\xbea\xed\xbb?\xf2\x94 O\t\xf2\xd4?t\xd1E\x17]t\xe1?F\x17]t\xd1E\xe7?{\x14\xaeG\xe1z\x84?{\x14\xaeG\xe1z\x84?\xf0\x1b\xd6\xbea\xed\xab?D\x17]t\xd1E\xc7?J\x90\xa7\x04yJ\xd0?F\x17]t\xd1E\xd7?\xa0\x12\xe4)A\x9e\xa2?\xa0\x12\xe4)A\x9e\xa2?\xf0\x1b\xd6\xbea\xed\xab?\xa0\x12\xe4)A\x9e\xa2?\xa0\x12\xe4)A\x9e\x92?{\x14\xaeG\xe1z\x84?{\x14\xaeG\xe1z\x84?{\x14\xaeG\xe1z\x84?{\x14\xaeG\xe1z\x84?{\x14\xaeG\xe1z\x84?{\x14\xaeG\xe1z\x84?{\x14\xaeG\xe1z\x84?\x98\x99\x99\x99\x99\x99\xc9?J\x90\xa7\x04yJ\xd0?\x1c\xd6\xbea\xed\x1b\xd6?\x9a\x99\x99\x99\x99\x99\xd9?B\x9e\x12\xe4)A\xde?l\xdf\xb0\xf6\rk\xdf?\xf2\x94 O\t\xf2\xd4?B\x9e\x12\xe4)A\xde?t\xd1E\x17]t\xe1?333333\xe3?333333\xe3?333333\xe3?{\x14\xaeG\xe1z\x84?{\x14\xaeG\xe1z\x84?{\x14\xaeG\xe1z\x84?{\x14\xaeG\xe1z\x84?{\x14\xaeG\xe1z\x84?{\x14\xaeG\xe1z\x84?{\x14\xaeG\xe1z\x84?{\x14\xaeG\xe1z\x84?\xa0\x12\xe4)A\x9e\x92?\xf0\x1b\xd6\xbea\xed\xab?\xa0\x12\xe4)A\x9e\xb2?\xa0\x12\xe4)A\x9e\xb2?\xa0\x12\xe4)A\x9e\x92?\xf0\x1b\xd6\xbea\xed\xab?\xa0\x12\xe4)A\x9e\xb2?\x98\x99\x99\x99\x99\x99\xc9?\x1c\xd6\xbea\xed\x1b\xd6?B\x9e\x12\xe4)A\xde?{\x14\xaeG\xe1z\x84?{\x14\xaeG\xe1z\x84?\xa0\x12\xe4)A\x9e\x92?\xa0\x12\xe4)A\x9e\xa2?H\x17]t\xd1E\xb7?\xf4\x94 O\t\xf2\xc4?\xa0\x12\xe4)A\x9e\xa2?\xa0\x12\xe4)A\x9e\xa2?\xa0\x12\xe4)A\x9e\x92?\xa0\x12\xe4)A\x9e\x92?\xa0\x12\xe4)A\x9e\xa2?\xa0\x12\xe4)A\x9e\x92?{\x14\xaeG\xe1z\x84?{\x14\xaeG\xe1z\x84?{\x14\xaeG\xe1z\x84?{\x14\xaeG\xe1z\x84?{\x14\xaeG\xe1z\x84?{\x14\xaeG\xe1z\x84?\x98\x99\x99\x99\x99\x99\xc9?\x9e\x12\xe4)A\x9e\xd2?\x1c\xd6\xbea\xed\x1b\xd6?F\x17]t\xd1E\xd7?\x9a\x99\x99\x99\x99\x99\xd9?l\xdf\xb0\xf6\rk\xdf?\xf2\x94 O\t\xf2\xd4?\xc4\xda7\xac}\xc3\xda?l\xdf\xb0\xf6\rk\xdf?\xe0\xb0\xf6\rk\xdf\xe0?\x18]t\xd1E\x17\xdd?B\x9e\x12\xe4)A\xde?{\x14\xaeG\xe1z\x84?{\x14\xaeG\xe1z\x84?{\x14\xaeG\xe1z\x84?{\x14\xaeG\xe1z\x84?{\x14\xaeG\xe1z\x84?{\x14\xaeG\xe1z\x84?{\x14\xaeG\xe1z\x84?{\x14\xaeG\xe1z\x84?{\x14\xaeG\xe1z\x84?{\x14\xaeG\xe1z\x84?{\x14\xaeG\xe1z\x84?{\x14\xaeG\xe1z\x84?\xa0\x12\xe4)A\x9e\x92?\xf0\x1b\xd6\xbea\xed\xab?\xa0\x12\xe4)A\x9e\xb2?\xa0\x12\xe4)A\x9e\xc2?\x9e\x12\xe4)A\x9e\xd2?pX\xfb\x86\xb5o\xd8?{\x14\xaeG\xe1z\x84?{\x14\xaeG\xe1z\x84?{\x14\xaeG\xe1z\x84?\xa0\x12\xe4)A\x9e\xa2?\xa0\x12\xe4)A\x9e\xc2?t\xd1E\x17]t\xd1?\xa0\x12\xe4)A\x9e\xa2?\xa0\x12\xe4)A\x9e\xa2?\xa0\x12\xe4)A\x9e\xa2?{\x14\xaeG\xe1z\x84?{\x14\xaeG\xe1z\x84?{\x14\xaeG\xe1z\x84?{\x14\xaeG\xe1z\x84?{\x14\xaeG\xe1z\x84?{\x14\xaeG\xe1z\x84?{\x14\xaeG\xe1z\x84?{\x14\xaeG\xe1z\x84?{\x14\xaeG\xe1z\x84?\x98\x99\x99\x99\x99\x99\xc9?\x9e\x12\xe4)A\x9e\xd2?\xf2\x94 O\t\xf2\xd4?l\xdf\xb0\xf6\rk\xdf?J\x90\xa7\x04yJ\xe0?\n\xf2\x94 O\t\xe2?\xf2\x94 O\t\xf2\xd4?pX\xfb\x86\xb5o\xd8?\xee\x1b\xd6\xbea\xed\xdb?J\x90\xa7\x04yJ\xe0?\n\xf2\x94 O\t\xe2?333333\xe3?{\x14\xaeG\xe1z\x84?{\x14\xaeG\xe1z\x84?\xa0\x12\xe4)A\x9e\x92?\xa0\x12\xe4)A\x9e\xa2?\xa0\x12\xe4)A\x9e\xa2?H\x17]t\xd1E\xb7?{\x14\xaeG\xe1z\x84?{\x14\xaeG\xe1z\x84?{\x14\xaeG\xe1z\x84?\xf0\x1b\xd6\xbea\xed\xab?\xa0\x12\xe4)A\x9e\xb2?\xf0\x1b\xd6\xbea\xed\xab?\xa0\x12\xe4)A\x9e\x92?\xa0\x12\xe4)A\x9e\xb2?H\x17]t\xd1E\xb7?\xc8S\x82<%\xc8\xd3?B\x9e\x12\xe4)A\xde?333333\xe3?{\x14\xaeG\xe1z\x84?{\x14\xaeG\xe1z\x84?\xf0\x1b\xd6\xbea\xed\xab?\xf4\x94 O\t\xf2\xc4?\x9e\x12\xe4)A\x9e\xd2?t\xd1E\x17]t\xe1?\xa0\x12\xe4)A\x9e\xa2?\xa0\x12\xe4)A\x9e\xa2?\xa0\x12\xe4)A\x9e\xa2?\xa0\x12\xe4)A\x9e\xb2?\xf0\x1b\xd6\xbea\xed\xbb?\xf0\x1b\xd6\xbea\xed\xbb?{\x14\xaeG\xe1z\x84?{\x14\xaeG\xe1z\x84?{\x14\xaeG\xe1z\x84?{\x14\xaeG\xe1z\x84?{\x14\xaeG\xe1z\x84?{\x14\xaeG\xe1z\x84?\x98\x99\x99\x99\x99\x99\xc9?\x1c\xd6\xbea\xed\x1b\xd6?\xee\x1b\xd6\xbea\xed\xdb?l\xdf\xb0\xf6\rk\xdf?\n\xf2\x94 O\t\xe2?\x1c\xd6\xbea\xed\x1b\xe6?\xf2\x94 O\t\xf2\xd4?B\x9e\x12\xe4)A\xde?\x87\xb5oX\xfb\x86\xe5?F\x17]t\xd1E\xe7?\x9a\x99\x99\x99\x99\x99\xe9?X\xfb\x86\xb5oX\xeb?{\x14\xaeG\xe1z\x84?{\x14\xaeG\xe1z\x84?\xa0\x12\xe4)A\x9e\x92?\xa0\x12\xe4)A\x9e\xb2?\xec\x1b\xd6\xbea\xed\xcb?\xc4\xda7\xac}\xc3\xda?{\x14\xaeG\xe1z\x84?{\x14\xaeG\xe1z\x84?\xa0\x12\xe4)A\x9e\xa2?\xf0\x1b\xd6\xbea\xed\xab?D\x17]t\xd1E\xc7?\xec\x1b\xd6\xbea\xed\xcb?\xa0\x12\xe4)A\x9e\x92?\xa0\x12\xe4)A\x9e\xb2?\xf4\x94 O\t\xf2\xc4?F\x17]t\xd1E\xd7?\xe0\xb0\xf6\rk\xdf\xe0?\n\xf2\x94 O\t\xe2?{\x14\xaeG\xe1z\x84?{\x14\xaeG\xe1z\x84?\xf0\x1b\xd6\xbea\xed\xbb?\xec\x1b\xd6\xbea\xed\xcb?\x18]t\xd1E\x17\xdd?]t\xd1E\x17]\xe4?\xa0\x12\xe4)A\x9e\xa2?\xa0\x12\xe4)A\x9e\xa2?\xf0\x1b\xd6\xbea\xed\xab?\xf0\x1b\xd6\xbea\xed\xab?\xa0\x12\xe4)A\x9e\xb2?\xf0\x1b\xd6\xbea\xed\xbb?{\x14\xaeG\xe1z\x84?{\x14\xaeG\xe1z\x84?\xa0\x12\xe4)A\x9e\x92?\xa0\x12\xe4)A\x9e\xa2?\xf0\x1b\xd6\xbea\xed\xab?H\x17]t\xd1E\xb7?\x98\x99\x99\x99\x99\x99\xc9?F\x17]t\xd1E\xd7?l\xdf\xb0\xf6\rk\xdf?\x9e\x12\xe4)A\x9e\xe2?\x87\xb5oX\xfb\x86\xe5?\xb1\xf6\rk\xdf\xb0\xe6?\xf2\x94 O\t\xf2\xd4?\x18]t\xd1E\x17\xdd?t\xd1E\x17]t\xe1?\xc8S\x82<%\xc8\xe3?\x87\xb5oX\xfb\x86\xe5?F\x17]t\xd1E\xe7?{\x14\xaeG\xe1z\x84?{\x14\xaeG\xe1z\x84?{\x14\xaeG\xe1z\x84?\xa0\x12\xe4)A\x9e\x92?\xf0\x1b\xd6\xbea\xed\xab?\xf0\x1b\xd6\xbea\xed\xbb?{\x14\xaeG\xe1z\x84?{\x14\xaeG\xe1z\x84?{\x14\xaeG\xe1z\x84?\xa0\x12\xe4)A\x9e\xa2?\xa0\x12\xe4)A\x9e\xa2?\xf0\x1b\xd6\xbea\xed\xbb?\xa0\x12\xe4)A\x9e\x92?\xa0\x12\xe4)A\x9e\xb2?@\x9e\x12\xe4)A\xce?B\x9e\x12\xe4)A\xde?\xf2\x94 O\t\xf2\xe4?\xee\x1b\xd6\xbea\xed\xeb?{\x14\xaeG\xe1z\x84?\xa0\x12\xe4)A\x9e\xa2?D\x17]t\xd1E\xc7?B\x9e\x12\xe4)A\xde?\x1c\xd6\xbea\xed\x1b\xe6?X\xfb\x86\xb5oX\xeb?\xa0\x12\xe4)A\x9e\xa2?\xa0\x12\xe4)A\x9e\xa2?\xa0\x12\xe4)A\x9e\xc2?@\x9e\x12\xe4)A\xce?\xf2\x94 O\t\xf2\xd4?\x18]t\xd1E\x17\xdd?{\x14\xaeG\xe1z\x84?\xa0\x12\xe4)A\x9e\x92?\xf0\x1b\xd6\xbea\xed\xbb?t\xd1E\x17]t\xd1?\xf2\x94 O\t\xf2\xd4?\xee\x1b\xd6\xbea\xed\xdb?\x98\x99\x99\x99\x99\x99\xc9?\x1c\xd6\xbea\xed\x1b\xd6?B\x9e\x12\xe4)A\xde?\xc8S\x82<%\xc8\xe3?\xf2\x94 O\t\xf2\xe4?\x9a\x99\x99\x99\x99\x99\xe9?\xf2\x94 O\t\xf2\xd4?\x9e\x12\xe4)A\x9e\xe2?\xdb7\xac}\xc3\xda\xe7?\xee\x1b\xd6\xbea\xed\xeb?\x17]t\xd1E\x17\xed?A\x9e\x12\xe4)A\xee?{\x14\xaeG\xe1z\x84?{\x14\xaeG\xe1z\x84?\xf0\x1b\xd6\xbea\xed\xab?\xf4\x94 O\t\xf2\xc4?\xc4\xda7\xac}\xc3\xda?\xc8S\x82<%\xc8\xe3?{\x14\xaeG\xe1z\x84?{\x14\xaeG\xe1z\x84?{\x14\xaeG\xe1z\x84?H\x17]t\xd1E\xb7?L\x90\xa7\x04yJ\xc0?\x98\x99\x99\x99\x99\x99\xc9?\xa0\x12\xe4)A\x9e\x92?\xa0\x12\xe4)A\x9e\xb2?@\x9e\x12\xe4)A\xce?B\x9e\x12\xe4)A\xde?]t\xd1E\x17]\xe4?pX\xfb\x86\xb5o\xe8?{\x14\xaeG\xe1z\x84?\xa0\x12\xe4)A\x9e\xa2?\xf4\x94 O\t\xf2\xc4?pX\xfb\x86\xb5o\xd8?\xc8S\x82<%\xc8\xe3?\xc4\xda7\xac}\xc3\xea?\xa0\x12\xe4)A\x9e\xa2?\xf0\x1b\xd6\xbea\xed\xab?L\x90\xa7\x04yJ\xc0?\x98\x99\x99\x99\x99\x99\xc9?\x9e\x12\xe4)A\x9e\xd2?F\x17]t\xd1E\xd7?{\x14\xaeG\xe1z\x84?\xa0\x12\xe4)A\x9e\x92?\xa0\x12\xe4)A\x9e\xc2?\xec\x1b\xd6\xbea\xed\xcb?pX\xfb\x86\xb5o\xd8?J\x90\xa7\x04yJ\xe0?\x98\x99\x99\x99\x99\x99\xc9?\x9a\x99\x99\x99\x99\x99\xd9?t\xd1E\x17]t\xe1?\x87\xb5oX\xfb\x86\xe5?\xb1\xf6\rk\xdf\xb0\xe6?.\xba\xe8\xa2\x8b.\xea?\xf2\x94 O\t\xf2\xd4?t\xd1E\x17]t\xe1?\xb1\xf6\rk\xdf\xb0\xe6?X\xfb\x86\xb5oX\xeb?\x82<%\xc8S\x82\xec?A\x9e\x12\xe4)A\xee?{\x14\xaeG\xe1z\x84?{\x14\xaeG\xe1z\x84?\xa0\x12\xe4)A\x9e\x92?\xa0\x12\xe4)A\x9e\xa2?\xa0\x12\xe4)A\x9e\xb2?\xec\x1b\xd6\xbea\xed\xcb?{\x14\xaeG\xe1z\x84?{\x14\xaeG\xe1z\x84?\xa0\x12\xe4)A\x9e\x92?\xa0\x12\xe4)A\x9e\xa2?\xec\x1b\xd6\xbea\xed\xcb?\x9e\x12\xe4)A\x9e\xd2?\xa0\x12\xe4)A\x9e\x92?\xa0\x12\xe4)A\x9e\xb2?\xf0\x1b\xd6\xbea\xed\xbb?\x9e\x12\xe4)A\x9e\xd2?\x18]t\xd1E\x17\xdd?\n\xf2\x94 O\t\xe2?{\x14\xaeG\xe1z\x84?{\x14\xaeG\xe1z\x84?\xa0\x12\xe4)A\x9e\xb2?\xa0\x12\xe4)A\x9e\xc2?J\x90\xa7\x04yJ\xd0?\x9e\x12\xe4)A\x9e\xd2?\xa0\x12\xe4)A\x9e\xa2?\xa0\x12\xe4)A\x9e\xa2?H\x17]t\xd1E\xb7?\xec\x1b\xd6\xbea\xed\xcb?\xc8S\x82<%\xc8\xd3?\x1c\xd6\xbea\xed\x1b\xd6?{\x14\xaeG\xe1z\x84?\xa0\x12\xe4)A\x9e\x92?\xa0\x12\xe4)A\x9e\xc2?\x9e\x12\xe4)A\x9e\xd2?\x9a\x99\x99\x99\x99\x99\xd9?333333\xe3?\x98\x99\x99\x99\x99\x99\xc9?\xf2\x94 O\t\xf2\xd4?\x18]t\xd1E\x17\xdd?333333\xe3?\x87\xb5oX\xfb\x86\xe5?pX\xfb\x86\xb5o\xe8?'
p26
tp27
bag1
(g2
(I0
tp28
g4
tp29
Rp30
(I1
(I2
I13
I8
I6
tp31
g11
I00
S'A\x9e\x12\xe4)A\xee?A\x9e\x12\xe4)A\xee?\xac}\xc3\xda7\xac\xed?\xed\x1b\xd6\xbea\xed\xeb?\xc3\xda7\xac}\xc3\xea?\x05yJ\x90\xa7\x04\xe9?\xed\x1b\xd6\xbea\xed\xab?\xed\x1b\xd6\xbea\xed\xab?\xed\x1b\xd6\xbea\xed\xab?\xed\x1b\xd6\xbea\xed\xab?{\x14\xaeG\xe1z\x84?{\x14\xaeG\xe1z\x84?\xed\x1b\xd6\xbea\xed\xbb?J\x90\xa7\x04yJ\xc0?F\x17]t\xd1E\xb7?\xed\x1b\xd6\xbea\xed\xab?\x9e\x12\xe4)A\x9e\xa2?\x9e\x12\xe4)A\x9e\x92?J\x90\xa7\x04yJ\xc0?\x9e\x12\xe4)A\x9e\xc2?\x9a\x99\x99\x99\x99\x99\xc9?A\x9e\x12\xe4)A\xce?\xc8S\x82<%\xc8\xd3?t\xd1E\x17]t\xd1?F\x17]t\xd1E\xb7?\x9a\x99\x99\x99\x99\x99\xc9?A\x9e\x12\xe4)A\xce?\x9a\x99\x99\x99\x99\x99\xc9?\x9a\x99\x99\x99\x99\x99\xc9?A\x9e\x12\xe4)A\xce?\x9e\x12\xe4)A\x9e\xc2?F\x17]t\xd1E\xc7?J\x90\xa7\x04yJ\xd0?\xf2\x94 O\t\xf2\xd4?pX\xfb\x86\xb5o\xd8?k\xdf\xb0\xf6\rk\xdf?\x9e\x12\xe4)A\x9e\xb2?\x9e\x12\xe4)A\x9e\xb2?\xed\x1b\xd6\xbea\xed\xab?\xed\x1b\xd6\xbea\xed\xab?\x9e\x12\xe4)A\x9e\xa2?\x9e\x12\xe4)A\x9e\xb2?\xc8S\x82<%\xc8\xe3?k\xdf\xb0\xf6\rk\xdf?J\x90\xa7\x04yJ\xe0?k\xdf\xb0\xf6\rk\xdf?t\xd1E\x17]t\xe1?\xc8S\x82<%\xc8\xe3?A\x9e\x12\xe4)A\xee?\x82<%\xc8S\x82\xec?\x82<%\xc8S\x82\xec?pX\xfb\x86\xb5o\xe8?\x87\xb5oX\xfb\x86\xe5?pX\xfb\x86\xb5o\xd8?\xed\x1b\xd6\xbea\xed\xab?\x9e\x12\xe4)A\x9e\xb2?F\x17]t\xd1E\xb7?J\x90\xa7\x04yJ\xc0?\xed\x1b\xd6\xbea\xed\xbb?F\x17]t\xd1E\xb7?\xed\x1b\xd6\xbea\xed\xbb?\xf2\x94 O\t\xf2\xc4?\x9e\x12\xe4)A\x9e\xc2?J\x90\xa7\x04yJ\xc0?F\x17]t\xd1E\xb7?\x9e\x12\xe4)A\x9e\xb2?J\x90\xa7\x04yJ\xc0?\x9e\x12\xe4)A\x9e\xc2?\xf2\x94 O\t\xf2\xc4?F\x17]t\xd1E\xb7?\xed\x1b\xd6\xbea\xed\xab?{\x14\xaeG\xe1z\x84?F\x17]t\xd1E\xb7?\xed\x1b\xd6\xbea\xed\xcb?\x9e\x12\xe4)A\x9e\xd2?\xf2\x94 O\t\xf2\xd4?\xc8S\x82<%\xc8\xd3?\x1c\xd6\xbea\xed\x1b\xd6?\x9e\x12\xe4)A\x9e\xc2?F\x17]t\xd1E\xc7?J\x90\xa7\x04yJ\xd0?\xf2\x94 O\t\xf2\xd4?\x1c\xd6\xbea\xed\x1b\xd6?pX\xfb\x86\xb5o\xd8?\x9e\x12\xe4)A\x9e\xb2?F\x17]t\xd1E\xb7?F\x17]t\xd1E\xb7?J\x90\xa7\x04yJ\xc0?\xf2\x94 O\t\xf2\xc4?F\x17]t\xd1E\xc7?\xc8S\x82<%\xc8\xe3?\xdf\xb0\xf6\rk\xdf\xe0?\xdf\xb0\xf6\rk\xdf\xe0?\xf2\x94 O\t\xf2\xd4?\xf2\x94 O\t\xf2\xd4?\xc8S\x82<%\xc8\xd3?A\x9e\x12\xe4)A\xee?\xac}\xc3\xda7\xac\xed?\xc3\xda7\xac}\xc3\xea?\xf2\x94 O\t\xf2\xe4?\x9e\x12\xe4)A\x9e\xe2?\xc3\xda7\xac}\xc3\xda?\xed\x1b\xd6\xbea\xed\xab?\xed\x1b\xd6\xbea\xed\xbb?\xf2\x94 O\t\xf2\xc4?t\xd1E\x17]t\xd1?t\xd1E\x17]t\xd1?\xf2\x94 O\t\xf2\xc4?\xed\x1b\xd6\xbea\xed\xbb?\xf2\x94 O\t\xf2\xc4?\xed\x1b\xd6\xbea\xed\xcb?A\x9e\x12\xe4)A\xce?J\x90\xa7\x04yJ\xd0?\xed\x1b\xd6\xbea\xed\xcb?J\x90\xa7\x04yJ\xc0?\x9e\x12\xe4)A\x9e\xc2?\x9e\x12\xe4)A\x9e\xb2?\x9e\x12\xe4)A\x9e\xa2?\x9e\x12\xe4)A\x9e\xa2?\x9e\x12\xe4)A\x9e\x92?F\x17]t\xd1E\xb7?\x9e\x12\xe4)A\x9e\xd2?pX\xfb\x86\xb5o\xd8?J\x90\xa7\x04yJ\xe0?t\xd1E\x17]t\xe1?333333\xe3?\x9e\x12\xe4)A\x9e\xc2?J\x90\xa7\x04yJ\xd0?F\x17]t\xd1E\xd7?\xed\x1b\xd6\xbea\xed\xdb?\xc3\xda7\xac}\xc3\xda?\xed\x1b\xd6\xbea\xed\xdb?\x9e\x12\xe4)A\x9e\xb2?\xed\x1b\xd6\xbea\xed\xbb?J\x90\xa7\x04yJ\xc0?\xf2\x94 O\t\xf2\xc4?\x9e\x12\xe4)A\x9e\xd2?\xed\x1b\xd6\xbea\xed\xdb?\xc8S\x82<%\xc8\xe3?\x9e\x12\xe4)A\x9e\xe2?F\x17]t\xd1E\xd7?\x9e\x12\xe4)A\x9e\xd2?\x9e\x12\xe4)A\x9e\xd2?\x9e\x12\xe4)A\x9e\xd2?A\x9e\x12\xe4)A\xee?A\x9e\x12\xe4)A\xee?A\x9e\x12\xe4)A\xee?A\x9e\x12\xe4)A\xee?\xac}\xc3\xda7\xac\xed?\x9a\x99\x99\x99\x99\x99\xe9?\xed\x1b\xd6\xbea\xed\xab?\x9a\x99\x99\x99\x99\x99\xc9?F\x17]t\xd1E\xd7?\xc3\xda7\xac}\xc3\xda?J\x90\xa7\x04yJ\xe0?\t\xf2\x94 O\t\xe2?\xed\x1b\xd6\xbea\xed\xbb?\xed\x1b\xd6\xbea\xed\xbb?\x9e\x12\xe4)A\x9e\xc2?\x9e\x12\xe4)A\x9e\xc2?\x9e\x12\xe4)A\x9e\xc2?\x9e\x12\xe4)A\x9e\xc2?J\x90\xa7\x04yJ\xc0?\x9e\x12\xe4)A\x9e\xc2?\xf2\x94 O\t\xf2\xc4?F\x17]t\xd1E\xc7?A\x9e\x12\xe4)A\xce?J\x90\xa7\x04yJ\xd0?F\x17]t\xd1E\xb7?t\xd1E\x17]t\xd1?\x9a\x99\x99\x99\x99\x99\xd9?\xed\x1b\xd6\xbea\xed\xdb?\xed\x1b\xd6\xbea\xed\xdb?\xc3\xda7\xac}\xc3\xda?\x9e\x12\xe4)A\x9e\xc2?F\x17]t\xd1E\xc7?\xc8S\x82<%\xc8\xd3?\x9a\x99\x99\x99\x99\x99\xd9?k\xdf\xb0\xf6\rk\xdf?k\xdf\xb0\xf6\rk\xdf?\x9e\x12\xe4)A\x9e\xb2?J\x90\xa7\x04yJ\xc0?\x9a\x99\x99\x99\x99\x99\xc9?t\xd1E\x17]t\xd1?\xc3\xda7\xac}\xc3\xda?]t\xd1E\x17]\xe4?\xc8S\x82<%\xc8\xe3?\xf2\x94 O\t\xf2\xe4?\xf2\x94 O\t\xf2\xe4?\x87\xb5oX\xfb\x86\xe5?F\x17]t\xd1E\xe7?pX\xfb\x86\xb5o\xe8?A\x9e\x12\xe4)A\xee?A\x9e\x12\xe4)A\xee?A\x9e\x12\xe4)A\xee?\xac}\xc3\xda7\xac\xed?\xac}\xc3\xda7\xac\xed?\x9a\x99\x99\x99\x99\x99\xe9?\xed\x1b\xd6\xbea\xed\xab?J\x90\xa7\x04yJ\xd0?\x9e\x12\xe4)A\x9e\xe2?X\xfb\x86\xb5oX\xeb?k\xdf\xb0\xf6\rk\xef?\xaeG\xe1z\x14\xae\xef?\xed\x1b\xd6\xbea\xed\xbb?\xed\x1b\xd6\xbea\xed\xcb?\x9a\x99\x99\x99\x99\x99\xc9?A\x9e\x12\xe4)A\xce?t\xd1E\x17]t\xd1?\xc8S\x82<%\xc8\xd3?J\x90\xa7\x04yJ\xc0?\x9a\x99\x99\x99\x99\x99\xc9?F\x17]t\xd1E\xd7?\xdf\xb0\xf6\rk\xdf\xe0?]t\xd1E\x17]\xe4?\xb1\xf6\rk\xdf\xb0\xe6?F\x17]t\xd1E\xb7?\xf2\x94 O\t\xf2\xd4?\xed\x1b\xd6\xbea\xed\xdb?F\x17]t\xd1E\xd7?J\x90\xa7\x04yJ\xd0?\x9e\x12\xe4)A\x9e\xc2?\x9e\x12\xe4)A\x9e\xc2?F\x17]t\xd1E\xd7?k\xdf\xb0\xf6\rk\xdf?pX\xfb\x86\xb5o\xd8?J\x90\xa7\x04yJ\xc0?\x9e\x12\xe4)A\x9e\x92?\x9e\x12\xe4)A\x9e\xb2?\x9e\x12\xe4)A\x9e\xc2?F\x17]t\xd1E\xd7?\xdb7\xac}\xc3\xda\xe7?A\x9e\x12\xe4)A\xee?\xaeG\xe1z\x14\xae\xef?\xc8S\x82<%\xc8\xe3?\t\xf2\x94 O\t\xe2?\xc3\xda7\xac}\xc3\xda?\x9a\x99\x99\x99\x99\x99\xd9?\x9e\x12\xe4)A\x9e\xd2?\xed\x1b\xd6\xbea\xed\xbb?A\x9e\x12\xe4)A\xee?A\x9e\x12\xe4)A\xee?A\x9e\x12\xe4)A\xee?\xd6\xbea\xed\x1b\xd6\xee?A\x9e\x12\xe4)A\xee?\xac}\xc3\xda7\xac\xed?\xed\x1b\xd6\xbea\xed\xab?\x9e\x12\xe4)A\x9e\xd2?t\xd1E\x17]t\xe1?/\xba\xe8\xa2\x8b.\xea?\x82<%\xc8S\x82\xec?\xd6\xbea\xed\x1b\xd6\xee?\xed\x1b\xd6\xbea\xed\xbb?\xed\x1b\xd6\xbea\xed\xcb?\xf2\x94 O\t\xf2\xd4?A\x9e\x12\xe4)A\xde?\xdf\xb0\xf6\rk\xdf\xe0?t\xd1E\x17]t\xe1?J\x90\xa7\x04yJ\xc0?A\x9e\x12\xe4)A\xce?\x9a\x99\x99\x99\x99\x99\xd9?\xdf\xb0\xf6\rk\xdf\xe0?\x05yJ\x90\xa7\x04\xe9?\x82<%\xc8S\x82\xec?F\x17]t\xd1E\xb7?F\x17]t\xd1E\xd7?\xdf\xb0\xf6\rk\xdf\xe0?]t\xd1E\x17]\xe4?\x1c\xd6\xbea\xed\x1b\xe6?\xdb7\xac}\xc3\xda\xe7?\x9e\x12\xe4)A\x9e\xc2?\xc3\xda7\xac}\xc3\xda?J\x90\xa7\x04yJ\xe0?\xdf\xb0\xf6\rk\xdf\xe0?F\x17]t\xd1E\xd7?\x9a\x99\x99\x99\x99\x99\xc9?\x9e\x12\xe4)A\x9e\xb2?\x9e\x12\xe4)A\x9e\xc2?\xed\x1b\xd6\xbea\xed\xcb?\x17]t\xd1E\x17\xdd?\xc8S\x82<%\xc8\xe3?pX\xfb\x86\xb5o\xe8?\xc8S\x82<%\xc8\xe3?333333\xe3?\t\xf2\x94 O\t\xe2?\x17]t\xd1E\x17\xdd?F\x17]t\xd1E\xd7?\x1c\xd6\xbea\xed\x1b\xd6?A\x9e\x12\xe4)A\xee?A\x9e\x12\xe4)A\xee?\x82<%\xc8S\x82\xec?X\xfb\x86\xb5oX\xeb?\x1c\xd6\xbea\xed\x1b\xe6?\xdf\xb0\xf6\rk\xdf\xe0?\xed\x1b\xd6\xbea\xed\xab?J\x90\xa7\x04yJ\xd0?k\xdf\xb0\xf6\rk\xdf?\xc8S\x82<%\xc8\xe3?\x1c\xd6\xbea\xed\x1b\xe6?\xdb7\xac}\xc3\xda\xe7?\xed\x1b\xd6\xbea\xed\xbb?\xed\x1b\xd6\xbea\xed\xcb?A\x9e\x12\xe4)A\xce?\xed\x1b\xd6\xbea\xed\xdb?\t\xf2\x94 O\t\xe2?]t\xd1E\x17]\xe4?J\x90\xa7\x04yJ\xc0?\xed\x1b\xd6\xbea\xed\xcb?\x1c\xd6\xbea\xed\x1b\xd6?t\xd1E\x17]t\xe1?\xb1\xf6\rk\xdf\xb0\xe6?\x05yJ\x90\xa7\x04\xe9?F\x17]t\xd1E\xb7?\x9a\x99\x99\x99\x99\x99\xd9?\xc8S\x82<%\xc8\xe3?\x9a\x99\x99\x99\x99\x99\xe9?A\x9e\x12\xe4)A\xee?k\xdf\xb0\xf6\rk\xef?\x9e\x12\xe4)A\x9e\xc2?J\x90\xa7\x04yJ\xd0?F\x17]t\xd1E\xd7?J\x90\xa7\x04yJ\xe0?333333\xe3?\x05yJ\x90\xa7\x04\xe9?\x9e\x12\xe4)A\x9e\xb2?F\x17]t\xd1E\xc7?\x9a\x99\x99\x99\x99\x99\xd9?]t\xd1E\x17]\xe4?pX\xfb\x86\xb5o\xe8?\xed\x1b\xd6\xbea\xed\xeb?\xc8S\x82<%\xc8\xe3?A\x9e\x12\xe4)A\xde?\x9e\x12\xe4)A\x9e\xd2?F\x17]t\xd1E\xc7?J\x90\xa7\x04yJ\xc0?\xed\x1b\xd6\xbea\xed\xab?A\x9e\x12\xe4)A\xee?A\x9e\x12\xe4)A\xee?\xd6\xbea\xed\x1b\xd6\xee?\xd6\xbea\xed\x1b\xd6\xee?A\x9e\x12\xe4)A\xee?\x17]t\xd1E\x17\xed?\xed\x1b\xd6\xbea\xed\xab?\xf2\x94 O\t\xf2\xd4?]t\xd1E\x17]\xe4?\x9a\x99\x99\x99\x99\x99\xe9?\xc3\xda7\xac}\xc3\xea?\xed\x1b\xd6\xbea\xed\xeb?\xed\x1b\xd6\xbea\xed\xbb?J\x90\xa7\x04yJ\xd0?J\x90\xa7\x04yJ\xe0?\xc8S\x82<%\xc8\xe3?333333\xe3?t\xd1E\x17]t\xe1?J\x90\xa7\x04yJ\xc0?\x9a\x99\x99\x99\x99\x99\xc9?\xed\x1b\xd6\xbea\xed\xdb?\xc8S\x82<%\xc8\xe3?\x9a\x99\x99\x99\x99\x99\xe9?\xac}\xc3\xda7\xac\xed?F\x17]t\xd1E\xb7?\xed\x1b\xd6\xbea\xed\xdb?\xb1\xf6\rk\xdf\xb0\xe6?\xd6\xbea\xed\x1b\xd6\xee?\xaeG\xe1z\x14\xae\xef?\xaeG\xe1z\x14\xae\xef?\x9e\x12\xe4)A\x9e\xc2?F\x17]t\xd1E\xd7?\x9e\x12\xe4)A\x9e\xe2?/\xba\xe8\xa2\x8b.\xea?A\x9e\x12\xe4)A\xee?k\xdf\xb0\xf6\rk\xef?\x9e\x12\xe4)A\x9e\xb2?\xed\x1b\xd6\xbea\xed\xcb?t\xd1E\x17]t\xe1?\x05yJ\x90\xa7\x04\xe9?\xac}\xc3\xda7\xac\xed?\xd6\xbea\xed\x1b\xd6\xee?\xc8S\x82<%\xc8\xe3?t\xd1E\x17]t\xe1?\x1c\xd6\xbea\xed\x1b\xd6?\x9e\x12\xe4)A\x9e\xc2?\xed\x1b\xd6\xbea\xed\xab?\x9e\x12\xe4)A\x9e\xa2?A\x9e\x12\xe4)A\xee?A\x9e\x12\xe4)A\xee?A\x9e\x12\xe4)A\xee?\xd6\xbea\xed\x1b\xd6\xee?\xac}\xc3\xda7\xac\xed?\xed\x1b\xd6\xbea\xed\xeb?\xed\x1b\xd6\xbea\xed\xab?t\xd1E\x17]t\xd1?\x9e\x12\xe4)A\x9e\xe2?\x9a\x99\x99\x99\x99\x99\xe9?\xd6\xbea\xed\x1b\xd6\xee?\xaeG\xe1z\x14\xae\xef?\xed\x1b\xd6\xbea\xed\xbb?t\xd1E\x17]t\xd1?\xdf\xb0\xf6\rk\xdf\xe0?\xf2\x94 O\t\xf2\xe4?\x05yJ\x90\xa7\x04\xe9?\xb1\xf6\rk\xdf\xb0\xe6?J\x90\xa7\x04yJ\xc0?\xed\x1b\xd6\xbea\xed\xcb?\xdf\xb0\xf6\rk\xdf\xe0?\x9a\x99\x99\x99\x99\x99\xe9?\x17]t\xd1E\x17\xed?\xaeG\xe1z\x14\xae\xef?F\x17]t\xd1E\xb7?pX\xfb\x86\xb5o\xd8?\x1c\xd6\xbea\xed\x1b\xe6?\x17]t\xd1E\x17\xed?\xaeG\xe1z\x14\xae\xef?\xaeG\xe1z\x14\xae\xef?\x9e\x12\xe4)A\x9e\xc2?F\x17]t\xd1E\xd7?\x87\xb5oX\xfb\x86\xe5?\xac}\xc3\xda7\xac\xed?\xd6\xbea\xed\x1b\xd6\xee?\xaeG\xe1z\x14\xae\xef?\x9e\x12\xe4)A\x9e\xb2?\x9e\x12\xe4)A\x9e\xd2?\xf2\x94 O\t\xf2\xe4?\x17]t\xd1E\x17\xed?k\xdf\xb0\xf6\rk\xef?\xaeG\xe1z\x14\xae\xef?\xc8S\x82<%\xc8\xe3?333333\xe3?\xdf\xb0\xf6\rk\xdf\xe0?\x17]t\xd1E\x17\xdd?\x9a\x99\x99\x99\x99\x99\xd9?\x1c\xd6\xbea\xed\x1b\xd6?A\x9e\x12\xe4)A\xee?\x17]t\xd1E\x17\xed?\x9a\x99\x99\x99\x99\x99\xe9?]t\xd1E\x17]\xe4?k\xdf\xb0\xf6\rk\xdf?\x9a\x99\x99\x99\x99\x99\xd9?\xed\x1b\xd6\xbea\xed\xab?\x9a\x99\x99\x99\x99\x99\xd9?pX\xfb\x86\xb5o\xe8?A\x9e\x12\xe4)A\xee?\xaeG\xe1z\x14\xae\xef?\xaeG\xe1z\x14\xae\xef?\xed\x1b\xd6\xbea\xed\xbb?\xed\x1b\xd6\xbea\xed\xcb?\xed\x1b\xd6\xbea\xed\xdb?]t\xd1E\x17]\xe4?\x9a\x99\x99\x99\x99\x99\xe9?\xed\x1b\xd6\xbea\xed\xeb?J\x90\xa7\x04yJ\xc0?t\xd1E\x17]t\xd1?\xf2\x94 O\t\xf2\xe4?\x82<%\xc8S\x82\xec?\xaeG\xe1z\x14\xae\xef?\xaeG\xe1z\x14\xae\xef?F\x17]t\xd1E\xb7?\t\xf2\x94 O\t\xe2?\xed\x1b\xd6\xbea\xed\xeb?\xaeG\xe1z\x14\xae\xef?\xaeG\xe1z\x14\xae\xef?\xaeG\xe1z\x14\xae\xef?\x9e\x12\xe4)A\x9e\xc2?F\x17]t\xd1E\xd7?t\xd1E\x17]t\xe1?\x05yJ\x90\xa7\x04\xe9?\xac}\xc3\xda7\xac\xed?A\x9e\x12\xe4)A\xee?\x9e\x12\xe4)A\x9e\xb2?J\x90\xa7\x04yJ\xd0?\t\xf2\x94 O\t\xe2?\x17]t\xd1E\x17\xed?\xd6\xbea\xed\x1b\xd6\xee?\xaeG\xe1z\x14\xae\xef?\xc8S\x82<%\xc8\xe3?\xed\x1b\xd6\xbea\xed\xdb?J\x90\xa7\x04yJ\xd0?\xed\x1b\xd6\xbea\xed\xbb?\xed\x1b\xd6\xbea\xed\xab?{\x14\xaeG\xe1z\x84?A\x9e\x12\xe4)A\xee?\x05yJ\x90\xa7\x04\xe9?\x9e\x12\xe4)A\x9e\xe2?pX\xfb\x86\xb5o\xd8?\xed\x1b\xd6\xbea\xed\xbb?{\x14\xaeG\xe1z\x84?\xed\x1b\xd6\xbea\xed\xab?\x87\xb5oX\xfb\x86\xe5?\xaeG\xe1z\x14\xae\xef?\xaeG\xe1z\x14\xae\xef?\xaeG\xe1z\x14\xae\xef?\xaeG\xe1z\x14\xae\xef?\xed\x1b\xd6\xbea\xed\xbb?\xed\x1b\xd6\xbea\xed\xdb?\xc3\xda7\xac}\xc3\xea?A\x9e\x12\xe4)A\xee?\xaeG\xe1z\x14\xae\xef?\xaeG\xe1z\x14\xae\xef?J\x90\xa7\x04yJ\xc0?k\xdf\xb0\xf6\rk\xdf?\x82<%\xc8S\x82\xec?\xaeG\xe1z\x14\xae\xef?\xaeG\xe1z\x14\xae\xef?\xaeG\xe1z\x14\xae\xef?F\x17]t\xd1E\xb7?\xf2\x94 O\t\xf2\xe4?k\xdf\xb0\xf6\rk\xef?\xaeG\xe1z\x14\xae\xef?\xaeG\xe1z\x14\xae\xef?\xaeG\xe1z\x14\xae\xef?\x9e\x12\xe4)A\x9e\xc2?\xc8S\x82<%\xc8\xe3?X\xfb\x86\xb5oX\xeb?\xd6\xbea\xed\x1b\xd6\xee?k\xdf\xb0\xf6\rk\xef?k\xdf\xb0\xf6\rk\xef?\x9e\x12\xe4)A\x9e\xb2?\xed\x1b\xd6\xbea\xed\xdb?\xd6\xbea\xed\x1b\xd6\xee?\xaeG\xe1z\x14\xae\xef?\xaeG\xe1z\x14\xae\xef?\xaeG\xe1z\x14\xae\xef?\xc8S\x82<%\xc8\xe3?\x9e\x12\xe4)A\x9e\xd2?F\x17]t\xd1E\xb7?\xed\x1b\xd6\xbea\xed\xab?\x9e\x12\xe4)A\x9e\x92?{\x14\xaeG\xe1z\x84?A\x9e\x12\xe4)A\xee?\xdb7\xac}\xc3\xda\xe7?\xdf\xb0\xf6\rk\xdf\xe0?A\x9e\x12\xe4)A\xce?{\x14\xaeG\xe1z\x84?{\x14\xaeG\xe1z\x84?\xed\x1b\xd6\xbea\xed\xab?J\x90\xa7\x04yJ\xe0?\xac}\xc3\xda7\xac\xed?\xaeG\xe1z\x14\xae\xef?\xaeG\xe1z\x14\xae\xef?\xaeG\xe1z\x14\xae\xef?\xed\x1b\xd6\xbea\xed\xbb?\x9a\x99\x99\x99\x99\x99\xd9?/\xba\xe8\xa2\x8b.\xea?\x17]t\xd1E\x17\xed?k\xdf\xb0\xf6\rk\xef?\xaeG\xe1z\x14\xae\xef?J\x90\xa7\x04yJ\xc0?J\x90\xa7\x04yJ\xe0?\x17]t\xd1E\x17\xed?\xaeG\xe1z\x14\xae\xef?\xaeG\xe1z\x14\xae\xef?\xaeG\xe1z\x14\xae\xef?F\x17]t\xd1E\xb7?J\x90\xa7\x04yJ\xe0?\xc3\xda7\xac}\xc3\xea?k\xdf\xb0\xf6\rk\xef?\xaeG\xe1z\x14\xae\xef?\xaeG\xe1z\x14\xae\xef?\x9e\x12\xe4)A\x9e\xc2?\xdf\xb0\xf6\rk\xdf\xe0?\xc3\xda7\xac}\xc3\xea?A\x9e\x12\xe4)A\xee?\xaeG\xe1z\x14\xae\xef?\xaeG\xe1z\x14\xae\xef?\x9e\x12\xe4)A\x9e\xb2?A\x9e\x12\xe4)A\xce?\x9e\x12\xe4)A\x9e\xe2?\xed\x1b\xd6\xbea\xed\xeb?\xd6\xbea\xed\x1b\xd6\xee?\xaeG\xe1z\x14\xae\xef?\xc8S\x82<%\xc8\xe3?\xc3\xda7\xac}\xc3\xda?\x9a\x99\x99\x99\x99\x99\xc9?F\x17]t\xd1E\xb7?\x9e\x12\xe4)A\x9e\x92?\x9e\x12\xe4)A\x9e\x92?A\x9e\x12\xe4)A\xee?pX\xfb\x86\xb5o\xe8?\xf2\x94 O\t\xf2\xe4?A\x9e\x12\xe4)A\xde?\xed\x1b\xd6\xbea\xed\xcb?\x9e\x12\xe4)A\x9e\x92?\xed\x1b\xd6\xbea\xed\xab?J\x90\xa7\x04yJ\xd0?333333\xe3?\x17]t\xd1E\x17\xed?k\xdf\xb0\xf6\rk\xef?\xaeG\xe1z\x14\xae\xef?\xed\x1b\xd6\xbea\xed\xbb?\xed\x1b\xd6\xbea\xed\xcb?F\x17]t\xd1E\xd7?\x1c\xd6\xbea\xed\x1b\xe6?\x9a\x99\x99\x99\x99\x99\xe9?\x82<%\xc8S\x82\xec?J\x90\xa7\x04yJ\xc0?\xf2\x94 O\t\xf2\xd4?\xc8S\x82<%\xc8\xe3?\x17]t\xd1E\x17\xed?\xaeG\xe1z\x14\xae\xef?\xaeG\xe1z\x14\xae\xef?F\x17]t\xd1E\xb7?\xf2\x94 O\t\xf2\xd4?333333\xe3?\xc3\xda7\xac}\xc3\xea?\xd6\xbea\xed\x1b\xd6\xee?\xaeG\xe1z\x14\xae\xef?\x9e\x12\xe4)A\x9e\xc2?F\x17]t\xd1E\xd7?333333\xe3?\xdb7\xac}\xc3\xda\xe7?\xac}\xc3\xda7\xac\xed?k\xdf\xb0\xf6\rk\xef?\x9e\x12\xe4)A\x9e\xb2?\xed\x1b\xd6\xbea\xed\xcb?A\x9e\x12\xe4)A\xde?X\xfb\x86\xb5oX\xeb?k\xdf\xb0\xf6\rk\xef?\xaeG\xe1z\x14\xae\xef?\xc8S\x82<%\xc8\xe3?\xed\x1b\xd6\xbea\xed\xdb?A\x9e\x12\xe4)A\xce?\xed\x1b\xd6\xbea\xed\xbb?F\x17]t\xd1E\xb7?\x9e\x12\xe4)A\x9e\xa2?\xf2\x94 O\t\xf2\xd4?\xf2\x94 O\t\xf2\xd4?\x1c\xd6\xbea\xed\x1b\xd6?\xf2\x94 O\t\xf2\xd4?\xc8S\x82<%\xc8\xd3?\x9e\x12\xe4)A\x9e\xd2?{\x14\xaeG\xe1z\x84?{\x14\xaeG\xe1z\x84?{\x14\xaeG\xe1z\x84?{\x14\xaeG\xe1z\x84?{\x14\xaeG\xe1z\x84?{\x14\xaeG\xe1z\x84?{\x14\xaeG\xe1z\x84?{\x14\xaeG\xe1z\x84?{\x14\xaeG\xe1z\x84?{\x14\xaeG\xe1z\x84?{\x14\xaeG\xe1z\x84?{\x14\xaeG\xe1z\x84?\xa0\x12\xe4)A\x9e\x92?\xa0\x12\xe4)A\x9e\x92?\xa0\x12\xe4)A\x9e\x92?{\x14\xaeG\xe1z\x84?{\x14\xaeG\xe1z\x84?{\x14\xaeG\xe1z\x84?{\x14\xaeG\xe1z\x84?{\x14\xaeG\xe1z\x84?{\x14\xaeG\xe1z\x84?{\x14\xaeG\xe1z\x84?{\x14\xaeG\xe1z\x84?\xa0\x12\xe4)A\x9e\x92?\xa0\x12\xe4)A\x9e\xa2?\xa0\x12\xe4)A\x9e\xa2?\xf0\x1b\xd6\xbea\xed\xab?\xf0\x1b\xd6\xbea\xed\xab?\xf0\x1b\xd6\xbea\xed\xab?\xa0\x12\xe4)A\x9e\xb2?{\x14\xaeG\xe1z\x84?{\x14\xaeG\xe1z\x84?{\x14\xaeG\xe1z\x84?{\x14\xaeG\xe1z\x84?{\x14\xaeG\xe1z\x84?{\x14\xaeG\xe1z\x84?\x98\x99\x99\x99\x99\x99\xc9?\xf4\x94 O\t\xf2\xc4?\xf4\x94 O\t\xf2\xc4?\x98\x99\x99\x99\x99\x99\xc9?J\x90\xa7\x04yJ\xd0?\xf2\x94 O\t\xf2\xd4?\xf2\x94 O\t\xf2\xd4?\x9e\x12\xe4)A\x9e\xd2?\xec\x1b\xd6\xbea\xed\xcb?\xf0\x1b\xd6\xbea\xed\xab?\xa0\x12\xe4)A\x9e\xa2?\xa0\x12\xe4)A\x9e\x92?{\x14\xaeG\xe1z\x84?{\x14\xaeG\xe1z\x84?{\x14\xaeG\xe1z\x84?{\x14\xaeG\xe1z\x84?{\x14\xaeG\xe1z\x84?{\x14\xaeG\xe1z\x84?{\x14\xaeG\xe1z\x84?{\x14\xaeG\xe1z\x84?{\x14\xaeG\xe1z\x84?{\x14\xaeG\xe1z\x84?{\x14\xaeG\xe1z\x84?{\x14\xaeG\xe1z\x84?\xa0\x12\xe4)A\x9e\x92?\xa0\x12\xe4)A\x9e\xa2?\xa0\x12\xe4)A\x9e\x92?{\x14\xaeG\xe1z\x84?{\x14\xaeG\xe1z\x84?{\x14\xaeG\xe1z\x84?{\x14\xaeG\xe1z\x84?{\x14\xaeG\xe1z\x84?{\x14\xaeG\xe1z\x84?{\x14\xaeG\xe1z\x84?\xa0\x12\xe4)A\x9e\x92?\xa0\x12\xe4)A\x9e\x92?\xa0\x12\xe4)A\x9e\xa2?\xa0\x12\xe4)A\x9e\xa2?\xf0\x1b\xd6\xbea\xed\xab?\xf0\x1b\xd6\xbea\xed\xab?H\x17]t\xd1E\xb7?\xf0\x1b\xd6\xbea\xed\xbb?{\x14\xaeG\xe1z\x84?{\x14\xaeG\xe1z\x84?\xa0\x12\xe4)A\x9e\x92?\xa0\x12\xe4)A\x9e\x92?\xa0\x12\xe4)A\x9e\x92?\xa0\x12\xe4)A\x9e\x92?\x98\x99\x99\x99\x99\x99\xc9?\xf4\x94 O\t\xf2\xc4?\xf4\x94 O\t\xf2\xc4?\xf0\x1b\xd6\xbea\xed\xbb?H\x17]t\xd1E\xb7?\xf0\x1b\xd6\xbea\xed\xbb?\xf2\x94 O\t\xf2\xd4?t\xd1E\x17]t\xd1?\xa0\x12\xe4)A\x9e\xc2?\xf0\x1b\xd6\xbea\xed\xab?\xf0\x1b\xd6\xbea\xed\xab?\xa0\x12\xe4)A\x9e\xa2?{\x14\xaeG\xe1z\x84?{\x14\xaeG\xe1z\x84?{\x14\xaeG\xe1z\x84?{\x14\xaeG\xe1z\x84?\xf0\x1b\xd6\xbea\xed\xab?{\x14\xaeG\xe1z\x84?{\x14\xaeG\xe1z\x84?{\x14\xaeG\xe1z\x84?\xa0\x12\xe4)A\x9e\xa2?\xa0\x12\xe4)A\x9e\xa2?\xf0\x1b\xd6\xbea\xed\xab?\xf0\x1b\xd6\xbea\xed\xab?\xa0\x12\xe4)A\x9e\x92?\xa0\x12\xe4)A\x9e\x92?{\x14\xaeG\xe1z\x84?\xf0\x1b\xd6\xbea\xed\xab?\xf0\x1b\xd6\xbea\xed\xbb?\xf0\x1b\xd6\xbea\xed\xbb?{\x14\xaeG\xe1z\x84?{\x14\xaeG\xe1z\x84?\xa0\x12\xe4)A\x9e\x92?\xa0\x12\xe4)A\x9e\xa2?H\x17]t\xd1E\xb7?\xf0\x1b\xd6\xbea\xed\xbb?\xa0\x12\xe4)A\x9e\xa2?\xa0\x12\xe4)A\x9e\xa2?\xf0\x1b\xd6\xbea\xed\xab?\xf0\x1b\xd6\xbea\xed\xab?\xa0\x12\xe4)A\x9e\xb2?\xf0\x1b\xd6\xbea\xed\xab?{\x14\xaeG\xe1z\x84?\xa0\x12\xe4)A\x9e\x92?\xa0\x12\xe4)A\x9e\x92?\xa0\x12\xe4)A\x9e\xa2?\xf0\x1b\xd6\xbea\xed\xab?\xf0\x1b\xd6\xbea\xed\xab?\x98\x99\x99\x99\x99\x99\xc9?D\x17]t\xd1E\xc7?\xf4\x94 O\t\xf2\xc4?\xa0\x12\xe4)A\x9e\xc2?D\x17]t\xd1E\xc7?L\x90\xa7\x04yJ\xc0?\xf2\x94 O\t\xf2\xd4?\xc8S\x82<%\xc8\xd3?\xee\x1b\xd6\xbea\xed\xdb?t\xd1E\x17]t\xe1?\x9a\x99\x99\x99\x99\x99\xd9?\xec\x1b\xd6\xbea\xed\xcb?{\x14\xaeG\xe1z\x84?{\x14\xaeG\xe1z\x84?\xa0\x12\xe4)A\x9e\xa2?\xf0\x1b\xd6\xbea\xed\xbb?L\x90\xa7\x04yJ\xc0?J\x90\xa7\x04yJ\xd0?{\x14\xaeG\xe1z\x84?{\x14\xaeG\xe1z\x84?{\x14\xaeG\xe1z\x84?\xa0\x12\xe4)A\x9e\x92?\xa0\x12\xe4)A\x9e\x92?\xa0\x12\xe4)A\x9e\x92?\xa0\x12\xe4)A\x9e\x92?\xa0\x12\xe4)A\x9e\x92?\xa0\x12\xe4)A\x9e\xa2?\xa0\x12\xe4)A\x9e\xa2?\xa0\x12\xe4)A\x9e\x92?\xa0\x12\xe4)A\x9e\x92?{\x14\xaeG\xe1z\x84?{\x14\xaeG\xe1z\x84?\xa0\x12\xe4)A\x9e\x92?\xa0\x12\xe4)A\x9e\xb2?\xa0\x12\xe4)A\x9e\xb2?H\x17]t\xd1E\xb7?\xa0\x12\xe4)A\x9e\xa2?\xa0\x12\xe4)A\x9e\xa2?\xa0\x12\xe4)A\x9e\xa2?\xa0\x12\xe4)A\x9e\xa2?H\x17]t\xd1E\xb7?L\x90\xa7\x04yJ\xc0?{\x14\xaeG\xe1z\x84?\xa0\x12\xe4)A\x9e\x92?\xa0\x12\xe4)A\x9e\x92?\xa0\x12\xe4)A\x9e\xb2?H\x17]t\xd1E\xb7?\xf0\x1b\xd6\xbea\xed\xbb?\x98\x99\x99\x99\x99\x99\xc9?\x9e\x12\xe4)A\x9e\xd2?t\xd1E\x17]t\xd1?\x9e\x12\xe4)A\x9e\xd2?\xc8S\x82<%\xc8\xd3?\x1c\xd6\xbea\xed\x1b\xd6?\xf2\x94 O\t\xf2\xd4?@\x9e\x12\xe4)A\xce?t\xd1E\x17]t\xd1?\xf2\x94 O\t\xf2\xd4?\xf2\x94 O\t\xf2\xd4?\xf4\x94 O\t\xf2\xc4?{\x14\xaeG\xe1z\x84?{\x14\xaeG\xe1z\x84?H\x17]t\xd1E\xb7?@\x9e\x12\xe4)A\xce?\x9a\x99\x99\x99\x99\x99\xd9?t\xd1E\x17]t\xe1?{\x14\xaeG\xe1z\x84?{\x14\xaeG\xe1z\x84?\xa0\x12\xe4)A\x9e\x92?\xa0\x12\xe4)A\x9e\x92?\xa0\x12\xe4)A\x9e\x92?\xa0\x12\xe4)A\x9e\xb2?\xa0\x12\xe4)A\x9e\x92?\xa0\x12\xe4)A\x9e\xb2?\xf0\x1b\xd6\xbea\xed\xbb?D\x17]t\xd1E\xc7?\x98\x99\x99\x99\x99\x99\xc9?t\xd1E\x17]t\xd1?{\x14\xaeG\xe1z\x84?{\x14\xaeG\xe1z\x84?{\x14\xaeG\xe1z\x84?{\x14\xaeG\xe1z\x84?{\x14\xaeG\xe1z\x84?{\x14\xaeG\xe1z\x84?\xa0\x12\xe4)A\x9e\xa2?\xa0\x12\xe4)A\x9e\xa2?L\x90\xa7\x04yJ\xc0?\xf0\x1b\xd6\xbea\xed\xbb?\xa0\x12\xe4)A\x9e\xa2?\xa0\x12\xe4)A\x9e\x92?{\x14\xaeG\xe1z\x84?\xa0\x12\xe4)A\x9e\x92?\xf0\x1b\xd6\xbea\xed\xbb?\xc8S\x82<%\xc8\xd3?\n\xf2\x94 O\t\xe2?\xdb7\xac}\xc3\xda\xe7?\x98\x99\x99\x99\x99\x99\xc9?D\x17]t\xd1E\xc7?\xf4\x94 O\t\xf2\xc4?H\x17]t\xd1E\xb7?\xa0\x12\xe4)A\x9e\xb2?\xa0\x12\xe4)A\x9e\x92?\xf2\x94 O\t\xf2\xd4?t\xd1E\x17]t\xd1?\xec\x1b\xd6\xbea\xed\xcb?\x98\x99\x99\x99\x99\x99\xc9?\x98\x99\x99\x99\x99\x99\xc9?\xa0\x12\xe4)A\x9e\xc2?{\x14\xaeG\xe1z\x84?{\x14\xaeG\xe1z\x84?\xf0\x1b\xd6\xbea\xed\xbb?@\x9e\x12\xe4)A\xce?\xe0\xb0\xf6\rk\xdf\xe0?\xb1\xf6\rk\xdf\xb0\xe6?{\x14\xaeG\xe1z\x84?\xa0\x12\xe4)A\x9e\x92?\xf0\x1b\xd6\xbea\xed\xab?\xf0\x1b\xd6\xbea\xed\xbb?\xf4\x94 O\t\xf2\xc4?\x98\x99\x99\x99\x99\x99\xc9?\xa0\x12\xe4)A\x9e\x92?\xa0\x12\xe4)A\x9e\xb2?\xa0\x12\xe4)A\x9e\xb2?\xec\x1b\xd6\xbea\xed\xcb?\xf2\x94 O\t\xf2\xd4?\xee\x1b\xd6\xbea\xed\xdb?{\x14\xaeG\xe1z\x84?{\x14\xaeG\xe1z\x84?\xf0\x1b\xd6\xbea\xed\xab?\xf0\x1b\xd6\xbea\xed\xbb?\xf4\x94 O\t\xf2\xc4?@\x9e\x12\xe4)A\xce?\xa0\x12\xe4)A\x9e\xa2?\xf0\x1b\xd6\xbea\xed\xab?\xa0\x12\xe4)A\x9e\xc2?\x98\x99\x99\x99\x99\x99\xc9?@\x9e\x12\xe4)A\xce?J\x90\xa7\x04yJ\xd0?{\x14\xaeG\xe1z\x84?\xa0\x12\xe4)A\x9e\x92?\xa0\x12\xe4)A\x9e\xb2?D\x17]t\xd1E\xc7?\xf2\x94 O\t\xf2\xd4?B\x9e\x12\xe4)A\xde?\x98\x99\x99\x99\x99\x99\xc9?D\x17]t\xd1E\xc7?D\x17]t\xd1E\xc7?\xf0\x1b\xd6\xbea\xed\xbb?\xf0\x1b\xd6\xbea\xed\xbb?\xa0\x12\xe4)A\x9e\xb2?\xf2\x94 O\t\xf2\xd4?J\x90\xa7\x04yJ\xd0?\x98\x99\x99\x99\x99\x99\xc9?\xf4\x94 O\t\xf2\xc4?\xf0\x1b\xd6\xbea\xed\xbb?H\x17]t\xd1E\xb7?{\x14\xaeG\xe1z\x84?\xa0\x12\xe4)A\x9e\x92?\xf0\x1b\xd6\xbea\xed\xbb?t\xd1E\x17]t\xd1?F\x17]t\xd1E\xd7?J\x90\xa7\x04yJ\xe0?{\x14\xaeG\xe1z\x84?\xa0\x12\xe4)A\x9e\x92?\xa0\x12\xe4)A\x9e\xb2?\xf0\x1b\xd6\xbea\xed\xbb?\xf4\x94 O\t\xf2\xc4?\xec\x1b\xd6\xbea\xed\xcb?\xa0\x12\xe4)A\x9e\x92?\xa0\x12\xe4)A\x9e\xb2?H\x17]t\xd1E\xb7?D\x17]t\xd1E\xc7?t\xd1E\x17]t\xd1?F\x17]t\xd1E\xd7?{\x14\xaeG\xe1z\x84?{\x14\xaeG\xe1z\x84?\xf0\x1b\xd6\xbea\xed\xbb?J\x90\xa7\x04yJ\xd0?\x9e\x12\xe4)A\x9e\xd2?l\xdf\xb0\xf6\rk\xdf?\xa0\x12\xe4)A\x9e\xa2?\xa0\x12\xe4)A\x9e\xa2?\xf0\x1b\xd6\xbea\xed\xab?\xf0\x1b\xd6\xbea\xed\xbb?\xf4\x94 O\t\xf2\xc4?\xec\x1b\xd6\xbea\xed\xcb?{\x14\xaeG\xe1z\x84?\xa0\x12\xe4)A\x9e\x92?\xa0\x12\xe4)A\x9e\xc2?\x9e\x12\xe4)A\x9e\xd2?\x9e\x12\xe4)A\x9e\xe2?\x1c\xd6\xbea\xed\x1b\xe6?\x98\x99\x99\x99\x99\x99\xc9?\xa0\x12\xe4)A\x9e\xc2?H\x17]t\xd1E\xb7?\xa0\x12\xe4)A\x9e\xb2?{\x14\xaeG\xe1z\x84?{\x14\xaeG\xe1z\x84?\xf2\x94 O\t\xf2\xd4?\x9e\x12\xe4)A\x9e\xd2?J\x90\xa7\x04yJ\xd0?t\xd1E\x17]t\xd1?\xec\x1b\xd6\xbea\xed\xcb?\x98\x99\x99\x99\x99\x99\xc9?{\x14\xaeG\xe1z\x84?\xa0\x12\xe4)A\x9e\xa2?D\x17]t\xd1E\xc7?\xc8S\x82<%\xc8\xd3?333333\xe3?\x1c\xd6\xbea\xed\x1b\xe6?{\x14\xaeG\xe1z\x84?\xa0\x12\xe4)A\x9e\xb2?@\x9e\x12\xe4)A\xce?J\x90\xa7\x04yJ\xd0?\xf2\x94 O\t\xf2\xd4?\x1c\xd6\xbea\xed\x1b\xd6?\xa0\x12\xe4)A\x9e\x92?\xa0\x12\xe4)A\x9e\xb2?L\x90\xa7\x04yJ\xc0?\xec\x1b\xd6\xbea\xed\xcb?\xf2\x94 O\t\xf2\xd4?l\xdf\xb0\xf6\rk\xdf?{\x14\xaeG\xe1z\x84?{\x14\xaeG\xe1z\x84?\xa0\x12\xe4)A\x9e\xc2?\xc8S\x82<%\xc8\xd3?l\xdf\xb0\xf6\rk\xdf?\x1c\xd6\xbea\xed\x1b\xe6?\xa0\x12\xe4)A\x9e\xa2?\xf0\x1b\xd6\xbea\xed\xab?L\x90\xa7\x04yJ\xc0?\xec\x1b\xd6\xbea\xed\xcb?\x1c\xd6\xbea\xed\x1b\xd6?pX\xfb\x86\xb5o\xd8?{\x14\xaeG\xe1z\x84?\xa0\x12\xe4)A\x9e\xa2?D\x17]t\xd1E\xc7?\xc4\xda7\xac}\xc3\xda?]t\xd1E\x17]\xe4?pX\xfb\x86\xb5o\xe8?\x98\x99\x99\x99\x99\x99\xc9?\xa0\x12\xe4)A\x9e\xc2?\xa0\x12\xe4)A\x9e\xa2?\xa0\x12\xe4)A\x9e\x92?{\x14\xaeG\xe1z\x84?{\x14\xaeG\xe1z\x84?\xf2\x94 O\t\xf2\xd4?@\x9e\x12\xe4)A\xce?\x98\x99\x99\x99\x99\x99\xc9?L\x90\xa7\x04yJ\xc0?\xf0\x1b\xd6\xbea\xed\xbb?\xf0\x1b\xd6\xbea\xed\xbb?{\x14\xaeG\xe1z\x84?\xa0\x12\xe4)A\x9e\x92?L\x90\xa7\x04yJ\xc0?\x9e\x12\xe4)A\x9e\xd2?\x9e\x12\xe4)A\x9e\xe2?\xc4\xda7\xac}\xc3\xea?{\x14\xaeG\xe1z\x84?L\x90\xa7\x04yJ\xc0?\x9e\x12\xe4)A\x9e\xd2?\xee\x1b\xd6\xbea\xed\xdb?\x18]t\xd1E\x17\xdd?pX\xfb\x86\xb5o\xd8?\xa0\x12\xe4)A\x9e\x92?\xa0\x12\xe4)A\x9e\xb2?\xf4\x94 O\t\xf2\xc4?\xf2\x94 O\t\xf2\xd4?l\xdf\xb0\xf6\rk\xdf?333333\xe3?{\x14\xaeG\xe1z\x84?{\x14\xaeG\xe1z\x84?\xa0\x12\xe4)A\x9e\xc2?\x9e\x12\xe4)A\x9e\xd2?\n\xf2\x94 O\t\xe2?\x9a\x99\x99\x99\x99\x99\xe9?\xa0\x12\xe4)A\x9e\xa2?\xf0\x1b\xd6\xbea\xed\xab?\xec\x1b\xd6\xbea\xed\xcb?\x1c\xd6\xbea\xed\x1b\xd6?t\xd1E\x17]t\xe1?\xf2\x94 O\t\xf2\xe4?{\x14\xaeG\xe1z\x84?\xa0\x12\xe4)A\x9e\xb2?\x9e\x12\xe4)A\x9e\xd2?\x87\xb5oX\xfb\x86\xe5?\x05yJ\x90\xa7\x04\xe9?\x17]t\xd1E\x17\xed?\x98\x99\x99\x99\x99\x99\xc9?L\x90\xa7\x04yJ\xc0?\xf0\x1b\xd6\xbea\xed\xab?\xf0\x1b\xd6\xbea\xed\xab?\xa0\x12\xe4)A\x9e\x92?{\x14\xaeG\xe1z\x84?\xf2\x94 O\t\xf2\xd4?D\x17]t\xd1E\xc7?\xa0\x12\xe4)A\x9e\xb2?\xa0\x12\xe4)A\x9e\xa2?\xa0\x12\xe4)A\x9e\xa2?{\x14\xaeG\xe1z\x84?{\x14\xaeG\xe1z\x84?\xa0\x12\xe4)A\x9e\x92?@\x9e\x12\xe4)A\xce?\n\xf2\x94 O\t\xe2?\xc4\xda7\xac}\xc3\xea?\x17]t\xd1E\x17\xed?{\x14\xaeG\xe1z\x84?\xf0\x1b\xd6\xbea\xed\xab?\x9e\x12\xe4)A\x9e\xd2?\xee\x1b\xd6\xbea\xed\xdb?\x9e\x12\xe4)A\x9e\xe2?333333\xe3?\xa0\x12\xe4)A\x9e\x92?\xa0\x12\xe4)A\x9e\xb2?t\xd1E\x17]t\xd1?\x18]t\xd1E\x17\xdd?\xc8S\x82<%\xc8\xe3?\xdb7\xac}\xc3\xda\xe7?{\x14\xaeG\xe1z\x84?\xf0\x1b\xd6\xbea\xed\xab?J\x90\xa7\x04yJ\xd0?\n\xf2\x94 O\t\xe2?\xc4\xda7\xac}\xc3\xea?A\x9e\x12\xe4)A\xee?\xa0\x12\xe4)A\x9e\xa2?\xf0\x1b\xd6\xbea\xed\xab?D\x17]t\xd1E\xc7?t\xd1E\x17]t\xd1?\xc4\xda7\xac}\xc3\xda?J\x90\xa7\x04yJ\xe0?{\x14\xaeG\xe1z\x84?\xa0\x12\xe4)A\x9e\xa2?t\xd1E\x17]t\xd1?\x18]t\xd1E\x17\xdd?\x1c\xd6\xbea\xed\x1b\xe6?\xc4\xda7\xac}\xc3\xea?\x98\x99\x99\x99\x99\x99\xc9?\xf0\x1b\xd6\xbea\xed\xbb?\xa0\x12\xe4)A\x9e\xa2?\xa0\x12\xe4)A\x9e\x92?{\x14\xaeG\xe1z\x84?{\x14\xaeG\xe1z\x84?\xf2\x94 O\t\xf2\xd4?\xa0\x12\xe4)A\x9e\xc2?\xa0\x12\xe4)A\x9e\xa2?\xa0\x12\xe4)A\x9e\x92?{\x14\xaeG\xe1z\x84?{\x14\xaeG\xe1z\x84?{\x14\xaeG\xe1z\x84?D\x17]t\xd1E\xc7?\x05yJ\x90\xa7\x04\xe9?\xac}\xc3\xda7\xac\xed?\xaeG\xe1z\x14\xae\xef?\xaeG\xe1z\x14\xae\xef?{\x14\xaeG\xe1z\x84?\xf4\x94 O\t\xf2\xc4?t\xd1E\x17]t\xe1?F\x17]t\xd1E\xe7?\x82<%\xc8S\x82\xec?\xd6\xbea\xed\x1b\xd6\xee?\xa0\x12\xe4)A\x9e\x92?D\x17]t\xd1E\xc7?J\x90\xa7\x04yJ\xe0?\x1c\xd6\xbea\xed\x1b\xe6?\x82<%\xc8S\x82\xec?\xd6\xbea\xed\x1b\xd6\xee?{\x14\xaeG\xe1z\x84?L\x90\xa7\x04yJ\xc0?B\x9e\x12\xe4)A\xde?\x05yJ\x90\xa7\x04\xe9?\xac}\xc3\xda7\xac\xed?\xaeG\xe1z\x14\xae\xef?\xa0\x12\xe4)A\x9e\xa2?\x9e\x12\xe4)A\x9e\xd2?t\xd1E\x17]t\xe1?\x05yJ\x90\xa7\x04\xe9?\xac}\xc3\xda7\xac\xed?\xd6\xbea\xed\x1b\xd6\xee?{\x14\xaeG\xe1z\x84?\x98\x99\x99\x99\x99\x99\xc9?\x9e\x12\xe4)A\x9e\xe2?\x82<%\xc8S\x82\xec?k\xdf\xb0\xf6\rk\xef?\xaeG\xe1z\x14\xae\xef?\x98\x99\x99\x99\x99\x99\xc9?\xa0\x12\xe4)A\x9e\xb2?{\x14\xaeG\xe1z\x84?{\x14\xaeG\xe1z\x84?{\x14\xaeG\xe1z\x84?{\x14\xaeG\xe1z\x84?\xf2\x94 O\t\xf2\xd4?\xa0\x12\xe4)A\x9e\xb2?\xa0\x12\xe4)A\x9e\xa2?{\x14\xaeG\xe1z\x84?{\x14\xaeG\xe1z\x84?{\x14\xaeG\xe1z\x84?{\x14\xaeG\xe1z\x84?\xa0\x12\xe4)A\x9e\xb2?t\xd1E\x17]t\xe1?\x82<%\xc8S\x82\xec?A\x9e\x12\xe4)A\xee?\xaeG\xe1z\x14\xae\xef?{\x14\xaeG\xe1z\x84?\xf4\x94 O\t\xf2\xc4?J\x90\xa7\x04yJ\xe0?F\x17]t\xd1E\xe7?\x17]t\xd1E\x17\xed?k\xdf\xb0\xf6\rk\xef?\xa0\x12\xe4)A\x9e\x92?\xf0\x1b\xd6\xbea\xed\xbb?\x18]t\xd1E\x17\xdd?\x87\xb5oX\xfb\x86\xe5?\x82<%\xc8S\x82\xec?\xd6\xbea\xed\x1b\xd6\xee?{\x14\xaeG\xe1z\x84?\xf0\x1b\xd6\xbea\xed\xab?\x98\x99\x99\x99\x99\x99\xc9?B\x9e\x12\xe4)A\xde?\x05yJ\x90\xa7\x04\xe9?\xac}\xc3\xda7\xac\xed?\xa0\x12\xe4)A\x9e\xa2?D\x17]t\xd1E\xc7?\xc4\xda7\xac}\xc3\xda?]t\xd1E\x17]\xe4?\x9a\x99\x99\x99\x99\x99\xe9?A\x9e\x12\xe4)A\xee?{\x14\xaeG\xe1z\x84?\xf0\x1b\xd6\xbea\xed\xab?@\x9e\x12\xe4)A\xce?B\x9e\x12\xe4)A\xde?\xb1\xf6\rk\xdf\xb0\xe6?\xc4\xda7\xac}\xc3\xea?\x98\x99\x99\x99\x99\x99\xc9?\xa0\x12\xe4)A\x9e\xb2?\xa0\x12\xe4)A\x9e\x92?{\x14\xaeG\xe1z\x84?{\x14\xaeG\xe1z\x84?{\x14\xaeG\xe1z\x84?\xf2\x94 O\t\xf2\xd4?\xa0\x12\xe4)A\x9e\xc2?\xa0\x12\xe4)A\x9e\xa2?\xa0\x12\xe4)A\x9e\xa2?\xa0\x12\xe4)A\x9e\x92?{\x14\xaeG\xe1z\x84?{\x14\xaeG\xe1z\x84?\xa0\x12\xe4)A\x9e\x92?\xf0\x1b\xd6\xbea\xed\xbb?F\x17]t\xd1E\xd7?\xb1\xf6\rk\xdf\xb0\xe6?X\xfb\x86\xb5oX\xeb?{\x14\xaeG\xe1z\x84?\xa0\x12\xe4)A\x9e\xa2?\xec\x1b\xd6\xbea\xed\xcb?\xc4\xda7\xac}\xc3\xda?\xe0\xb0\xf6\rk\xdf\xe0?\xb1\xf6\rk\xdf\xb0\xe6?\xa0\x12\xe4)A\x9e\x92?\xa0\x12\xe4)A\x9e\xb2?J\x90\xa7\x04yJ\xd0?B\x9e\x12\xe4)A\xde?333333\xe3?F\x17]t\xd1E\xe7?{\x14\xaeG\xe1z\x84?{\x14\xaeG\xe1z\x84?H\x17]t\xd1E\xb7?D\x17]t\xd1E\xc7?\xf2\x94 O\t\xf2\xd4?l\xdf\xb0\xf6\rk\xdf?\xa0\x12\xe4)A\x9e\xa2?\xf0\x1b\xd6\xbea\xed\xab?@\x9e\x12\xe4)A\xce?pX\xfb\x86\xb5o\xd8?\xe0\xb0\xf6\rk\xdf\xe0?\x1c\xd6\xbea\xed\x1b\xe6?{\x14\xaeG\xe1z\x84?\xf0\x1b\xd6\xbea\xed\xab?@\x9e\x12\xe4)A\xce?\x18]t\xd1E\x17\xdd?pX\xfb\x86\xb5o\xe8?X\xfb\x86\xb5oX\xeb?\x98\x99\x99\x99\x99\x99\xc9?\xa0\x12\xe4)A\x9e\xc2?\xa0\x12\xe4)A\x9e\xa2?\xa0\x12\xe4)A\x9e\x92?{\x14\xaeG\xe1z\x84?{\x14\xaeG\xe1z\x84?'
p32
tp33
ba.
