# Supplementary material for: How biological attention mechanisms improve task performance in a large-scale visual system model
Source: eLife journal article supplement (doi:10.7554/elife.38105), 2018-10-01
Supplement: supp [file elife-38105-supp-v1.zip › elife_poa_e38105_Figure_6_figure_supplement_1.pdf]

Layer Recorded From:

2

6

8

10

12

Attention  
at:

Normed  
Count

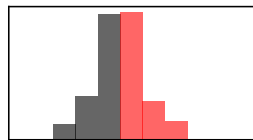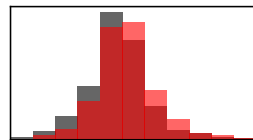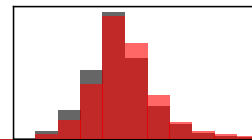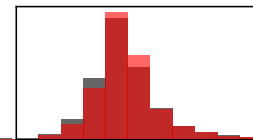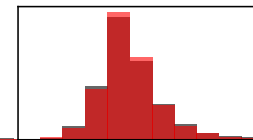

2

1 1.5  
Activity Ratio

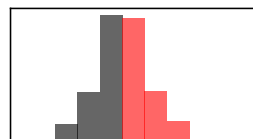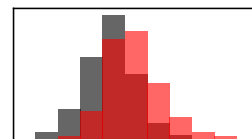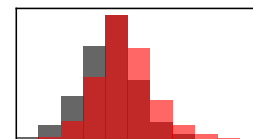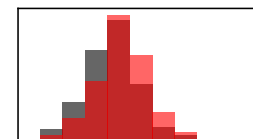

6

1 1.5  
Activity Ratio

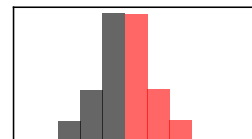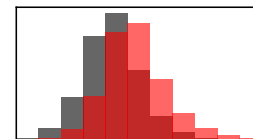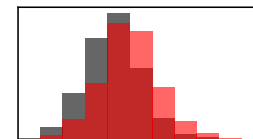

8

1 1.5  
Activity Ratio

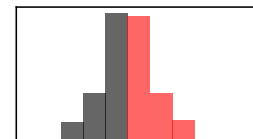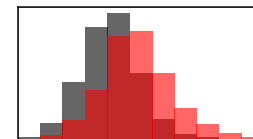

10

1 1.5  
Activity Ratio

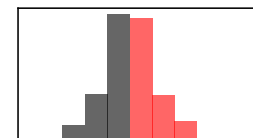

12

1 1.5  
Activity Ratio

Tuning value > 0

Tuning value < 0

$$\text{Activity Ratio} = \frac{\text{Attend Category}}{\text{No Attention}}$$
