# Supplementary material for: How biological attention mechanisms improve task performance in a large-scale visual system model
Source: eLife journal article supplement (doi:10.7554/elife.38105), 2018-10-01
Supplement: supp [file elife-38105-supp-v1.zip › elife_poa_e38105_Figure_6_source_data_1.txt]

(lp0
(lp1
cnumpy.core.multiarray
_reconstruct
p2
(cnumpy
ndarray
p3
(I0
tp4
S'b'
p5
tp6
Rp7
(I1
(I2
I64
tp8
cnumpy
dtype
p9
(S'f8'
p10
I0
I1
tp11
Rp12
(I3
S'<'
p13
NNNI-1
I-1
I0
tp14
bI01
S'\xc4\xfcC\xc9\xe0j\x98\xbc\xfc\xff\xff\xff\xff\xff\xef?\xc4\xfcC\xc9\xe0j\x98\xbc\xfc\xff\xff\xff\xff\xff\xef?\xc4\xfcC\xc9\xe0j\x98\xbc\xfc\xff\xff\xff\xff\xff\xef?\xc4\xfcC\xc9\xe0j\x98\xbc\xfc\xff\xff\xff\xff\xff\xef?\xc4\xfcC\xc9\xe0j\x98\xbc\xfc\xff\xff\xff\xff\xff\xef?\xc4\xfcC\xc9\xe0j\x98\xbc\xfc\xff\xff\xff\xff\xff\xef?\xc4\xfcC\xc9\xe0j\x98\xbc\xfc\xff\xff\xff\xff\xff\xef?\xc4\xfcC\xc9\xe0j\x98\xbc\xfc\xff\xff\xff\xff\xff\xef?\xc4\xfcC\xc9\xe0j\x98\xbc\xfc\xff\xff\xff\xff\xff\xef?\xc4\xfcC\xc9\xe0j\x98\xbc\xfc\xff\xff\xff\xff\xff\xef?\xc4\xfcC\xc9\xe0j\x98\xbc\xfc\xff\xff\xff\xff\xff\xef?\xc4\xfcC\xc9\xe0j\x98\xbc\xfc\xff\xff\xff\xff\xff\xef?\xc4\xfcC\xc9\xe0j\x98\xbc\xfc\xff\xff\xff\xff\xff\xef?\xc4\xfcC\xc9\xe0j\x98\xbc\xfc\xff\xff\xff\xff\xff\xef?\xc4\xfcC\xc9\xe0j\x98\xbc\xfc\xff\xff\xff\xff\xff\xef?\xc4\xfcC\xc9\xe0j\x98\xbc\xfc\xff\xff\xff\xff\xff\xef?\xc4\xfcC\xc9\xe0j\x98\xbc\xfc\xff\xff\xff\xff\xff\xef?\xc4\xfcC\xc9\xe0j\x98\xbc\xfc\xff\xff\xff\xff\xff\xef?\xc4\xfcC\xc9\xe0j\x98\xbc\xfc\xff\xff\xff\xff\xff\xef?\xc4\xfcC\xc9\xe0j\x98\xbc\xfc\xff\xff\xff\xff\xff\xef?\xc4\xfcC\xc9\xe0j\x98\xbc\xfc\xff\xff\xff\xff\xff\xef?\xc4\xfcC\xc9\xe0j\x98\xbc\xfc\xff\xff\xff\xff\xff\xef?\xc4\xfcC\xc9\xe0j\x98\xbc\xfc\xff\xff\xff\xff\xff\xef?\xc4\xfcC\xc9\xe0j\x98\xbc\xfc\xff\xff\xff\xff\xff\xef?\xc4\xfcC\xc9\xe0j\x98\xbc\xfc\xff\xff\xff\xff\xff\xef?\xc4\xfcC\xc9\xe0j\x98\xbc\xfc\xff\xff\xff\xff\xff\xef?\xc4\xfcC\xc9\xe0j\x98\xbc\xfc\xff\xff\xff\xff\xff\xef?\xc4\xfcC\xc9\xe0j\x98\xbc\xfc\xff\xff\xff\xff\xff\xef?\xc4\xfcC\xc9\xe0j\x98\xbc\xfc\xff\xff\xff\xff\xff\xef?\xc4\xfcC\xc9\xe0j\x98\xbc\xfc\xff\xff\xff\xff\xff\xef?\xc4\xfcC\xc9\xe0j\x98\xbc\xfc\xff\xff\xff\xff\xff\xef?\xc4\xfcC\xc9\xe0j\x98\xbc\xfc\xff\xff\xff\xff\xff\xef?\xc4\xfcC\xc9\xe0j\x98\xbc\xfc\xff\xff\xff\xff\xff\xef?\xc4\xfcC\xc9\xe0j\x98\xbc\xfc\xff\xff\xff\xff\xff\xef?\xc4\xfcC\xc9\xe0j\x98\xbc\xfc\xff\xff\xff\xff\xff\xef?\xc4\xfcC\xc9\xe0j\x98\xbc\xfc\xff\xff\xff\xff\xff\xef?\xc4\xfcC\xc9\xe0j\x98\xbc\xfc\xff\xff\xff\xff\xff\xef?\xc4\xfcC\xc9\xe0j\x98\xbc\xfc\xff\xff\xff\xff\xff\xef?\xc4\xfcC\xc9\xe0j\x98\xbc\xfc\xff\xff\xff\xff\xff\xef?\xc4\xfcC\xc9\xe0j\x98\xbc\xfc\xff\xff\xff\xff\xff\xef?\xc4\xfcC\xc9\xe0j\x98\xbc\xfc\xff\xff\xff\xff\xff\xef?\xc4\xfcC\xc9\xe0j\x98\xbc\xfc\xff\xff\xff\xff\xff\xef?\xc4\xfcC\xc9\xe0j\x98\xbc\xfc\xff\xff\xff\xff\xff\xef?\xc4\xfcC\xc9\xe0j\x98\xbc\xfc\xff\xff\xff\xff\xff\xef?\xc4\xfcC\xc9\xe0j\x98\xbc\xfc\xff\xff\xff\xff\xff\xef?\xc4\xfcC\xc9\xe0j\x98\xbc\xfc\xff\xff\xff\xff\xff\xef?\xc4\xfcC\xc9\xe0j\x98\xbc\xfc\xff\xff\xff\xff\xff\xef?\xc4\xfcC\xc9\xe0j\x98\xbc\xfc\xff\xff\xff\xff\xff\xef?\xc4\xfcC\xc9\xe0j\x98\xbc\xfc\xff\xff\xff\xff\xff\xef?\xc4\xfcC\xc9\xe0j\x98\xbc\xfc\xff\xff\xff\xff\xff\xef?\xc4\xfcC\xc9\xe0j\x98\xbc\xfc\xff\xff\xff\xff\xff\xef?\xc4\xfcC\xc9\xe0j\x98\xbc\xfc\xff\xff\xff\xff\xff\xef?\xc4\xfcC\xc9\xe0j\x98\xbc\xfc\xff\xff\xff\xff\xff\xef?\xc4\xfcC\xc9\xe0j\x98\xbc\xfc\xff\xff\xff\xff\xff\xef?\xc4\xfcC\xc9\xe0j\x98\xbc\xfc\xff\xff\xff\xff\xff\xef?\xc4\xfcC\xc9\xe0j\x98\xbc\xfc\xff\xff\xff\xff\xff\xef?\xc4\xfcC\xc9\xe0j\x98\xbc\xfc\xff\xff\xff\xff\xff\xef?\xc4\xfcC\xc9\xe0j\x98\xbc\xfc\xff\xff\xff\xff\xff\xef?\xc4\xfcC\xc9\xe0j\x98\xbc\xfc\xff\xff\xff\xff\xff\xef?\xc4\xfcC\xc9\xe0j\x98\xbc\xfc\xff\xff\xff\xff\xff\xef?\xc4\xfcC\xc9\xe0j\x98\xbc\xfc\xff\xff\xff\xff\xff\xef?\xc4\xfcC\xc9\xe0j\x98\xbc\xfc\xff\xff\xff\xff\xff\xef?\xc4\xfcC\xc9\xe0j\x98\xbc\xfc\xff\xff\xff\xff\xff\xef?\xc4\xfcC\xc9\xe0j\x98\xbc\xfc\xff\xff\xff\xff\xff\xef?'
p15
tp16
bag2
(g3
(I0
tp17
g5
tp18
Rp19
(I1
(I2
I64
tp20
g12
I01
S'0A\xb1/!\xc9\xa1\xbf\xb5\xe8\xc2aH\xb3\xf0?9\x95F\xa7-\xfd\x89\xbfF*s\xa6\x18]\xf0?*\x988\xa0\x85\xc0^?\xd9\xc3yh\r\x90\xef?\x83#\xfa|/\x1b`\xbf#\'B\xd6r\x14\xf0?\xaco\x8f=ys\x83?\xad\xdaGN-P\xef?E8p\xcc\x1e\xcc\x90?\xf3\xe3\x1e\xe4Z\xe8\xee?\xa0>w\xd9\xca\x19\x90\xbf\xd79-yb\x97\xf0?\x8c\x88%\xfb\xab{\\\xbf\x9e\xa3Ts\x83\xf3\xef?=\xde`\xa6\x0e\xa7p?\x03\x15\xb3\xea\xf8Y\xf0?u\xd2u\xba\x91J\x85\xbf\x04\xc7\xfe\x80~\x8e\xf0?\x02\xa6@\x8dU \x8a\xbf\x04\xaa\x05\n\xc7\xf1\xef?\xe4\x03\x18\xbb\x86@\x8b\xbf\xbd\xfa\x18|6\xec\xef?\x82\x94w\x02\xa9m\x99?\x90$P\xady\xb4\xee?\xe2\xd5\xa8U\x03\xd0\x90?\x89\xfcun5B\xef?\x03r\xb1\xc0D\x1e[?\xe2Z\xd0\xad\x92 \xf0?G\x9c\x90\xe8f\x0fe\xbf<\x16\x89\x9e\xb2\x0c\xf0?\x04`\x8b5\x8c\xe2R\xbf\x13\xe6\x17\xfe\xda|\xf0?\xa8\x03\xadb\xef\x89S\xbf\x0b7[\x14\xc3}\xf0?\xef\x06\xaf\xd7\x9e\xc3~\xbf\xd2i\xd6\xf4\x135\xf0??\x87w\x86k!\xb2\xbf\x8d\xe2X\xc0gd\xf0?1\xd78\x90G\xb4\x93?(^\x07\x83b[\xee?\xec\xc2y\xe9L%\x96?\xab\x16\xdf\xb9Y\x93\xee?L\x8f-\x10\x89\xd1i\xbf\xc4\xbc\xa4\xf8\xa2[\xf0?\xbb\xc6\x8b\x1da\x04}\xbf\x81\xb5Ii\xb4=\xf0?_\xae\xa8\xc2YRw\xbf\xc7Qr\xef\x0e*\xf0?o\xba\x9a\xfc\xce.f?A\xba\xdd^\xdc\xe7\xef?\x03\xe2\xaf(\xeb\x0b\xaa\xbf\x01\xd9\xeb\xed<k\xf2?\xdd\xa5\xbc\x19XWp\xbf=\xf1\x07\xef\xba-\xf0?{I\xce#\x88\xeb\x96\xbf\xd9\xb9\x08r\xee\xc4\xf0?\xfbvj\xa2\x0bx\xa9\xbf\xf6\'\xa8\xa5\xee\xb0\xf0?\xda\xc9\xa0\xc2\r\xf0\xa7?Z\xcd\x0c\xfar\xc0\xea?h\xc0\xeeh\xb8ab?0\x94\x92qv\xc9\xef?\xe6\xb7\xb8\xc13\xb6p\xbf\xd4\xe0\xe1\xa22\t\xf0?\x93\xed\xa1\xd0\xae\xbfr\xbfMv\x88\x83\x07@\xf0?\x7fSM\xe0\xfbOw\xbf\x8d\xb3&\xb8\xb2c\xf0? \xce\x03\xab\x9e\x82\xb0\xbf\xa3\xe7J=a\x8a\xf0?_\x87\xc9\x83\x9c\x01j?\x9f@\x96\x8d\x83\xec\xef?,\xf4\xf6$\x1f\x93\x95\xbfU\xedD\x82\xca*\xf1?\xcb\x10\xf2\xd3\x839`\xbf\xddHTr>&\xf0?\xeb\x93\x08}\xb2bs\xbf`\xcfdA\x95-\xf0?p\xf4\x96\x90\xff\xf4\x94\xbfX\xe6\x05/&\xa9\xf0?2\x00\xe2\x16I\t\x83?\xa2\xdc\xda\xcbXy\xef?iAFk\xc0\xe9\x83?"\xcd\xb1\x90\xd5}\xef?\x8b@-\nq\xb9j\xbf6\x07\x18\x01$P\xf0?\x18\xa6\xaa\x984\'~?\x83\xf9\x12\xc2\x1ae\xef?\x88\xf5\x04\x81r\xd1t\xbfq:@\x84\x82)\xf0?\x0b0\x88"\x06\x04\x8d?Ra\xb0&\nX\xef?\x01v\x83\xf9I\x04\xa6\xbf\xce\xa0\xfd\xd8\xe6\x9f\xf0?=\xe9\x19C\x1f\xe4w?O\xd6\xc2\xa9\xc9\x06\xf0?\xbb;\xa0\xa7O\x1c\x84\xbfH\xf7w\x00s\x1f\xf0?v\xff\x18\xbe\xdc9\x89?\xdf\xb4\xd4\xe3a\xcd\xee?~\x86\t\xa4\x11\xe2\x90?\xbcD\xd7\xde\xae\xb3\xee?\\\xbf\xe9\xe6\xf4\xd4e\xbf\xe1v\xfe\n\xac$\xf0?\x8b\r\x80\xfao\xb2\xa2\xbfG\x02"]\xe3\xb6\xf1?\xf2IPv\x93\x9c{?\xeb\xbc%\x06Wh\xef?$Nzn;\x14\x8b?\xe6\x92\xfa\xad\xad\xaf\xed?\xcf\xbb8\x0b"<\x9b\xbf\xdaGd\xf7~8\xf1?\x0e-\x00\x93\x83u\xa5?+\x83\x9a\xb6\x8cl\xeb?,\n\xbeh\xf1\x04\x7f?\x8ai\xe61i\x8d\xef?MKp\\\xc5A\x9b?\'\r\xc9\xabE\x9b\xec?\xb0\xf4!\x17\xf8[1\xbfM\x94\xd8\x07*\xbf\xef?\xf4\xcf\xaf\xee{\xf2g\xbfm\x01\xc2X\xb2\x00\xf0?i%\x0e6\xd3\xab\xa3?\xd0\x00\xbf\x8c\xaf\x9d\xeb?\xab\xf4*\xa7w\x8aj?k\x84\x8fQ\xfe\x1f\xf0?'
p21
tp22
bag2
(g3
(I0
tp23
g5
tp24
Rp25
(I1
(I2
I128
tp26
g12
I01
S'\x87\x0e\xdb\xbb\x15\xe2\x97\xbf\xbds$\xd8\xa0\x1f\xf1?S\xe9:%\x08\xa4\x8f?\x925\xfa\xd8JB\xf0?\xbc\xa8y\x9ewU\x8f?\n\x98/\x80\xd9\x14\xee?\x91\x8c\xae\xfe\xe3\xadT?Q\xaac\x9a\xc6\xa0\xef?\x12<\xde\xc4\x01\xcdb?\xdf\x8d\xff\x07\x0bH\xf0?G nF\xa8\xecy?sO\x0cs\x07\x03\xef?\xe1\x1f\xc9\xee8y\x9b?\xd1\xd1L\x0f!u\xed?iF*\xe2U\xf7\x93\xbf\x19\x84.\xb1\x80_\xf0?)\xbb?\xb4\xec\x80\x95?W\xfd\xb0\x19eN\xef?\xf6\xc6\xad\xc6\xe7\xaa\x85\xbf\xc1f\x1d\xcd\xb4%\xf0?a\x17\x1a\x01\xadU\xa0?\xd8\x03\xf2\x1d>g\xee?\x1a\xa1\x04\xc1I;\x8c\xbfJ\x12,\x9c\x90\xc7\xf0?\xb8O\x06j\x0c\xe1c?\xf5\xe0\x18\x1c\x17\x99\xef?-\xe8\xcbx\xe2\xdb<?R\x050\xc8K\xdf\xef?\xab\xc3y\x07,\x83\x89?\x87%\x8enF\xb0\xef?a\x16\xe9=\xb0\x08\x7f\xbf\x81\x8eD(,\xd6\xef?1=:\xd5{\xad\xa6\xbf\xccUd\x89:j\xf1?\n\x91\x0e\t\x87\xc8}\xbf-\xc9s.-u\xf0?\xb55\xe8\x12\xc8wd?\xc5\xd5\x9cx\xc4\x94\xef?\x90\xa1\xf2\xef\x84\x17~?\x1f\x9b`\xf1\xb6=\xee?\x15\x1d\x8b\x12P!v?w\x00!\xd7R<\xee?\xb8m5\xb3w\x1f\x8e?\x01\x05!\xb7]\xcc\xee?t\xc7TW\xb8}\xa7\xbf1\xc5b\xdf\xb2\xfd\xf0?\xa2vk\xa5\xbb\x06\xa7\xbf\xf1s\xc4x\xe7\xb3\xf1?Y>\x0c2\xc5\xa6\xaa\xbfO\xed\xe2\xaf\xd9\xd9\xf0?\x0cT@{\xe5\xae\x80?\x9a\xf8&.}\xc0\xef?]\x9f\x94c\x03\x0c\xa2\xbf\\\xeb\x87\x15x\xde\xf0?\xce\xf5\xa3\x01?D\x8e\xbf\xb7J\x9a\xf7\x84>\xf0?\x82\x82\xa6\xb5\xe5\xfc\x91\xbf\x9doU\xa0\x8d\x9a\xf1?\xafH9\xd1r\xe1\x8e\xbf\x92\x8d\xf2\xef\x92\x10\xf1?\xd9.\xd6\x19e\xc1\x82?\x90*h\x0fA\xed\xef?B&\x8b\x01\x015i?\x14\xa7\x1c\x16\x93\xe4\xef?`j|ts\xa5t\xbf{y<\xf5O\xf1\xef?w\x19\x8c@?\xc3\x8f?\xb2:\xf5\xe0\xbc\x17\xef?\xf9t\x1ag5\x04\xae\xbf\xdf\xb9\xba\xae\xfe/\xf1?\x87\xa8\x9c?\xfb\xe0\x9e\xbf\xdeS\x10\xdd\xac\x1a\xf1?\xfd !\xa4p\xb8\x94\xbf\xd0\xa9\x1b\xaf\xf6\xdb\xf0?\xe3\x9a\r\xff\xc5d\x9e?\x1f\xb9\x1do\xafE\xef?s&\x92\xb3Q\x12\x9f\xbf5\xc7\x88\x82\xbe\x93\xf0?\x17\x148u\xf9Y^\xbfr_\x16\xbe\xbc\x07\xf0?\xe6\x07\xa2J\xa6\x91r\xbfK\xfd\x05\xe3\xbb\x9b\xf0?\x07u\x8d\xeds\x92%\xbf\x14\x1c\x83)e\x11\xf0?\xfeC\xad\xa1\xd7\x98\x99\xbf\x1d!\x86!]E\xf1?\xfa\x819q5\x8eR?n\xbc]L\xa9\xa7\xef?\x8f\xa4\x0b\xd3U\xbev\xbf\r\xd1\xaeb\x1d<\xf0?C\xfa\x04\x98\x02T\x93?\x9e\xc8\xad\xb5\xa6\xc7\xee?\xfc\x92O1\xa5\xa5`?\xecJ`?v\xcc\xef?\xf1,\xb1\xae\xa9\xed\x90\xbfO\xa5\x19\x9c\x8e\x00\xf1?V\x9a`\xe5\x96\xa7\x95?F2\xa5m\xfc\x9a\xee?\xd9Z\x92$9\xff\x87\xbfx\xeb\x0b:\x17X\xf0?\x9e\xeb\xc1#\xbe\x17m\xbf4\x95\xa6=\xae\x05\xf0?8=\x7f\xe7\xcfIy?D\xd9"\xe6\xc3\n\xf0?\xe7\x98F\xe5:\xe7\x81\xbf\xf8$\'3\xdc:\xf0?\xe1\xf6\x91\xcc\xad\xb2e\xbf?\x14\xb1\x04\xc0\x1c\xf0?N\xeb2\x92U\x0bx?>\xd2]W\x1b\xe9\xee?FJk\x9bb\x19\x8e\xbf\xcc\x9d\xe2;\x16J\xf0?\xa8/k\xde\x0c\xb5i\xbf\xe2\x0b\rG\xf7\xe1\xef?%\xe1\xa2\xfb\xe3\xa9\xb0\xbf\x89k#\x9a\xc5\x8c\xf1?\xf1B\xbbX\xf0\x9e\x1a\xbf;\xa5c4\x18H\xef?\xfe\x14\xa5\x8f\xa2\xd3P\xbf\xd4\x11\xe8W=\xb1\xf0? \xaa*\xc3\xc8\xa2j?M\x02\xae\xc4\x9b\xd7\xef?tx\xba\xc4?\x82\x9c?t\xee\x96\x0f\x0e \xee?\xef_\xc1\x1c\xca+|\xbf\x8e\xb3\xc4\x04\xff\x81\xf0?\xb1t\x04\x8a\x95\x0e\x80?\x1f\x82\x8e\x90\x12\x95\xef?\xa9\xc5\xf1\x04\xa8\xcao?\x9a\xf3\xd2\x15\xf9\xe1\xef?\xf5\x9e\xfd\xeb\xa6O>\xbf\xbe\t+\xe5X\xe8\xef?\xf5o\x9c!\xd5>\xa0?\xceb\x919\x13\t\xed?\x0c\x021rsw\xa5\xbf\xba\x1e\x9b\xbd\x94\x06\xf1?\xf6\x0fZ"\x9e\xca\x95\xbf\x90\x9b\x858h:\xf1?\xd7\x83c\xb1\xf2\xf1\x8f\xbf\xbd(\xf1\x13\\}\xf0?\xc0\x9d\xb8\xb1\xb0\xd2r\xbf\x91\xc3U\xd4\xc9\x04\xf0?*\x9e\xdd~\x9c\x98k?\x8f\xda\xca;\x87\x8b\xef?\xd7\xefP\xf1@9\xb2\xbf\xf8Mc\xe1Ny\xf0?\x8bn\xd9\xf31\xe4\x94?]iHc>I\xee?6\xa9\x18\x05\xd7W\x7f\xbf\xd1\x9bv\xc6\xbd\x07\xf0?\xa5:(1\xff\x8e\xae\xbfwg\xfc!\x0e\xff\xf2?\xd2\xeeZ\x03O\xb8\x93\xbf\xf0\x15T\xf5\xdf\xed\xf0?\xac\xed6qe&\xa2?\x8b\xeem:KF\xee?[b\xb6\xa7\x82\x89\x91\xbf\xb03z\xbd.\x86\xf0?5(d\xd4d\x8e\x87?\xc1\x9c\xbc\r\x03\x95\xef?\xfb\xbe\xa6\xef\xec\xb4q\xbff/\xe3\xb9\x08\xfd\xef?\xf7\x8aZgnP\xa2\xbf\x149\xcdkX\xe2\xf0?\xd8\x8f\x18\xd5;\xfe\x8a?\x90\x01\xd3\x94\xc5*\xef?\x04\x8c\xa0\x03|\x0c\xa6?\xf4\xba\xba\xb2\x07\x98\xed?\x86on\xa5\x19\xff\xa2\xbf\xd7\x86\xbe\xf1\xe72\xf2?\'\x05\xc7\x11\xe2\x16\x98?\x1d%\xee\x14M\x03\xee?Qbk\x1a\x11\xe3Q\xbf&\xaf\x98\xb7r\xd4\xef?*\xbc\x88_b\xff\x93?\xbb.B\xdf\x8eD\xee?j\xd6\x1f\x0ea7y\xbf@s\xc8\xab\xfd\x81\xf0?\xfd`y\xc8QRu?]\ru\x8a\xb6\x8c\xef?(Lg\r4\xcc\x91\xbfd\xf4\xa0\xfaIK\xf0?\xb1a\xfd\x08\xab+\xaa\xbf\xf9\xd4{\xe9\x9e\xf5\xf1?\xc6=\x8a\xa2\x80&~\xbf\xcd^\x9b\x9e\xd12\xf0?\xb4-\xe2J3N\\\xbfT\xea\xc5\x8f\x96\x92\xef?FU\x92U\x1az~\xbf]a\xfb\x80\xcc\x15\xf0?\x90\x0f\x00\xdd\xf4n\x8e?\x85\x84N\x16p\xc2\xee?e\xb8!O\xa7U^\xbf\xe08\xb4\x1c\xaa\xc3\xef?\x1d\x14<\xe3}1\x99?\xc2\x93\xdd-\xc3s\xee?\xdei\x8cZ\x19\x97\xa2\xbf\xba\xd7\xcf\xcc\xb0P\xf0?sb8\x90\xda"|\xbf!\n\xda\xef\x02T\xf0?:So\xae?\xc8\x99?\xaeS\xfeN/\x83\xee?\xc8\xdc\r\xba\x15\xf8~\xbf\x85$i$d`\xf0?]\x0c\x19=\xe1\xe6l?\x1042\x8a=\x93\xef?&F\x18\xcd\xd2Y\x90\xbfJ\xed}\xc7\xb6\xba\xf0?\x8e\x0enO\xfb\xf9]\xbf\x82\x12=j\x97\xd8\xef?\xe1\xf3\x1a\xd2\xf6\xfbm?H\x8e\x9c(p`\xef?\x12\xa86?i\xd7}?\x13\xba{\x1c\xff\xf7\xef?\xfe?(\x17\xcaW\xb1\xbf\xfbFIt\xe3J\xf1?\xef\xb1?\xc7\xd2\x8b\x8c\xbf\xc8\x90C\xbb\xe9\x81\xf0?\xe6\xf4O>u\xc7\x94?\xb4\x80js>e\xee?\x17\xb9\xfd \xcf\xbc\xa8\xbf\t@!\r\xe0\x0b\xf1?\x97\x18\x9b\x81\xeaH\x95?\x8ab\x11c\xae\x1e\xee?\xa2\xcc\x85\xb9s\x9c\x90\xbfA\xd5C\'\xaa#\xf1?\xb4[\xd7\xd6\xa1\xa17?Q=(\xae\xdbc\xef?7\xabY|\x9f\x1bs\xbf6?i3\xaa\t\xf0?\x14\xc9\\\x82y\x15\x97\xbf\x10\xfc\xd7\xbd\xe9\x8f\xf0?\x1c\x9e:\xc6\xc25_\xbf\xe1\xff|\x1f\x85P\xf0?\x91\xed\xb5\xc2\x96\x8aC\xbf\x17\x19T\x96\x17\xec\xef?k\x9c\xcb\xd3\xady\xa1\xbf\x91\x85\x94v\x97\x15\xf1?7o\x17\x15\xa0\x83\x88?/\xf3\xab8,\xe8\xee?Y\x8d\x934H\xf5e\xbf\xff\xf3\xcf\x89E\x08\xf0?O6\xb3\xa9\xa8n\xad\xbf\x97ZI\xca\x93X\xf3?\x85\xf1\\\r\\\x1cS?\xac`\xf7\xd2+\x14\xf0?\xcb^\x90e\xae\xa0\x87\xbf\x1b\xe9e\x1d\x05r\xf0?#\x1e\xa6o\x12(\x80\xbf:>\xf6\x8a\xe0\xdf\xf1?@\x14\xc3\xea\xc0\x0b}?\x1e\x127\xdf>\xf4\xed?\xc1+?\x8eia\x96\xbf\xf6B\xffHs\x8e\xf1?\x04\xe9\x8dv\x95\xa5{\xbf\xf8DMy\xc7\xf3\xef?'
p27
tp28
bag2
(g3
(I0
tp29
g5
tp30
Rp31
(I1
(I2
I128
tp32
g12
I01
S'\xf8\x14\xe5\x88x\xfft\xbfQ%\xe5\xa7E%\xf0?\xee?\x9e\xfc\xacF\x9f?\'\x94\xbf\x92\t\x82\xee?CO\x0be\x9cK\xa6\xbf\x16\x05\xc1{\x8b8\xf1?\xa41\x9f%Ew\x92\xbf\x9c\xb6\x8f,\'W\xf0?M\xb4\x7f\xa4\x81\x98\x8b\xbf\xfch\xbcxn\xaf\xf0?\xa9\xeb\xee\xd2\x8d\x19\xb6?\xe3\xd8\xf4\x83\xd7\xbf\xed?\x9b?\xdc\xa5\xee\x93\xaa?\x82^\x07\xc5s\xbb\xed?\xa1\x18\x03\xf2\x10^\xa0?\x7f\xb234\x88\xc3\xee?\xc5\x13c(\x92X}?\xfb\xd7\x1a\x8a\xc8q\xef?!\xa7\x0b\xf8\xef\xbdj\xbf\xe1\xa6\xaa\x8a\x8e\xee\xef?fHB_\xea\xf2\xb0?\xc3\x8520\x16\xef\xe7?\xb9\xe7\x98J\xeai~?\xf7\xd8:\xd7\x92\x94\xef?\xd3\xc2\x87\xed\x14\xeb^?\xa4\xf2\x90\x03\xa1\xf4\xf1?@w\xcdO\x130\x93\xbf)\x89\xb3>\x05D\xf0?$\x9f\x98\xda\xde\xfa\xcb?h\xc9\xca|\xad\x92\xe7?v\xeaI\x0e\r\xc5\xb0?\xd2\x8ax+3\xe7\xec?\x84\xcftu\xf7\xfax?D\x03\xd3\xb4v\x8d\xf0?^\x9d\x9aLL\xc5\xb5\xbf\x01[\xffc\x1ce\xf2?%7\xe1\xca\x9c\xfbi\xbf\x92\x9ft\x8cZ\x16\xf0?\xa9\xa5$\x7f\xe0\xcd\xaf?\x8ac\xa6w\'~\xeb?\xdf\xf2\xca\'8vf\xbf\xf6\xe0\x9e\xd0\xe3\xc9\xef?\xabW\x85\x85\xd54{?)\xd9\xe9\xecM\xdc\xef?\xb5\x9bj +2\xab\xbf.\x992Wu\xc3\xf0?s\x86\xcd\x02\xe4\xd0o\xbf\xda\x06\t\x14\xd2\xdb\xef?\xf6\x96\xf7\x9641\xb0\xbfW`\x025K\xe7\xf1?\xca\xd6l\xca\xedTc\xbf\xff:\x82\xdek5\xf0?\x0f\xben\xb8\x15\\\xa1\xbffi\xe9\xd66s\xf1?\x85v\xcd\\|\xb6\xd1?\xb2Y\xc1n\x12=\xdb?\xc0]\xd6\xb9P\xa0\x9e\xbf\xc9}\x8c\xc2\xd6\xe7\xf0?\xe6\x80\xe0\xd5%T6\xbfeM\xf0\x82\xa4\xcf\xef?\x8f\xda:\x8f\x85\x16\x84\xbf\t5iJm,\xf0?\xa7\x12\\f\xa4\xfe\x99\xbf\x8bM\'\x0c-\xbf\xf0?\x7fo\x9f\xb93\xcf\x99\xbf\xfc&\xf9:\x18G\xf1?\xb0\xcd; O\xe1\x98?|\xfc\xb2\xc4\x11}\xef?c\x99\xc7,\x98E\x8c?6\xda\xd2\xd7\xd16\xf0?&\xb9i\x1a\xe2\x99b\xbf\xf3GI$a\x1d\xf0?[\xef\xfbrS\x81h?\x8d\xe1\xe4\xee\xe9)\xf0?\x19\x95Z\x1e/\xab\xaf\xbf\xee\xd5w\x0c\xa3\x11\xf1?R\x06\xf9\x94\xb4\x01\x99\xbfGt;\t\xa4\x96\xf0?{\xe0<\xbc\xe3\xa5\xb4\xbf\x9c\x01Sti\x8d\xf1?\x98Xp\x18\xfayT\xbfr\x0c\x96\x89hN\xf0?\x8cq<\x8e\x1f4\x97\xbf\\\xfb\x90\x95\x95\r\xee?Y2c\xe5E\xcc\x80?\xa7\xff\xdd\xd1\x06\x92\x06@\xae$>\xd2$\xe4q?\x95^-\xde)\x95\xef?\xd7\xad\x00\x96d\xb8\xa7\xbf\x88\x8d\xf1\x7ff\xae\xf0?\xafW\xae=\x0bX\x96?\x81\x9d\x9c\xc1\xc2\xe5\xee?\x9d\xa9\xf4\x03sx\xab?~\x1c\x01\t.(\xe4?z\xd8\x9b\x06\xaf\x1ap\xbf\xef\xdc\x8b\xe9\xebY\xef?\xc9f0\x0b\x0c\xdew?\xda\x96\x1e\x99[c\xef?\x0c\x83E`\xce\x04g?{\xf7`J\x041\xf0?+\x9d!\xab7\x05Y?V\xb9*>M\xaf\xef?\xdbo\x8d\xf6k\\\x95?\x00\x9f\xb1|JI\xef?\xb4P\x81\xdf\x0e\xf6\x9d?\xa7\x16l\xfe\xc5\xdd\xee?\x1c\xe0\x9b\xfb\xcf\xd6\x8d\xbf^\xd4\xa8\xd0\xd1a\xf1?]%\xa8w\xf0\x16\xa8?\xaf"A\xee\xdb6\xf1?\x00\xff\xdcE\x0eF\x93?\xa88\xa6q\xb0*\xf0?\x889\xec\x84\x98\xd2\x98?\'\x19-\xe5\x11\x86\xef?\xdd\x04\xdf\x86\xb5\x15l\xbf\x08\xacS\x8c\x1cY\xf0?\xe6\x94\x82\x81X\x86M?\xa4\xcc\x86\xac\xfc\xc7\xef?,y7\xf6\xb56}\xbf\x82\x85\xf8\xd1<\xaa\xf0?J4\xee\xce\xech\x86?\xc1]\x15H\xcf\x90\xef?\xa4\x8fc\x9a\xc0\xedb\xbf\xc8\xe0\xe3\xc3?\r\xf0?\xdb\x85\x12\x04\n\xbfu\xbfaOc\x0b\xf3X\xf0?`]\xf2K@\xb4\x86?\xa1\xa7\xa5p>1\xef?f\x96B4\x92J\x7f\xbf\xc5t\x18\xe7\xd0\xbb\xef?\x1f&\x98\xbd\x9b\x8f\x80?\x1eg\x0c[_9\xef?\xd3\xe9&\xc4\x8f\xc1\x92?Ca\xe4U\xb4`\xef?3\xa5\xbf\xec\x9a{\x88?\xc8~[\x18\xd4&\xf0?\xe0\xb5\x01\x06\x8b`\xab\xbf\xb8d\xd3\xf5\x80r\xf4?(\xd2\rq\xa2C\x92?\xa6\x8cU!C\xf1\xed?X%|6\x17\xb1\x85?,\xa9J\xb6v\x97\xee?d\xaaAYC \x91\xbf\x88\x93\xd0Y9f\xf0?/\xd7`\xeaI\x83\x80?V\xef\xa2\x95\x8b\xec\xef?wEG\xde\r\xf1r\xbf4\xe0\xeb\xe7\x04\x0f\xf0?i?\x1f\x0b\xe7mv?\xc2`@\x1c\x9c$\xf0?\x0fC8T\x19l\x96\xbf\x81\x85\xf5/\xfb\x8a\xf1?\xd6\xfd\xa8\xf7\x05a\x90\xbf5\x13\x00[\xa9\x81\xf0?\xdaFF\xb1\x8ak\x8b\xbfBe\xdd96w\xf0?\x00\x04Q\xfdQ&\x85?\x0cp\x8c\x1fJ\x8b\xef?\x80)J\xb7\xe06\xa3\xbf\x9d\x8f?s\x14Q\xf1?\xb3\xc9\x98\xa1\xf4\x1d\xb9?\xb5o\xc1x%\xe2\xed?\xcc72\xa4EU\xc4?\xe2\x80\x10\ro$\xec?#|\x9d)\xd5\xcfu\xbf\xcc\'&\x94\x15\xcc\xef?\x9e\xf4\n\xb7\x85\xed\xad?\x86V\xc3\x94\x83\xe4\xed?\xa5u\x80\xa9\xdd\xc1\x9e?\xfa\x9fF`&\xd7\xee?G\x1cZt\x1b$Y\xbf\x99\xf6\x1e\x9b\xaa\r\xf0?\xda\xe8\xec\xa7g|%?\xf7\xfe\x87\xfa\x84g\xef?c\x9d\xe5\x17\'\xaa\x93\xbf\x98\xc3\x0bG]\xef\xef?\xfbt2\x86~\x98\xa0\xbf\x85\xae\xd6\xba\xa5b\xee?\xc1\x10\xd1.R\xbe\x87\xbfj+\xee\x0f\x93C\xf0?B\r\\\xab\xff\xcd\xa8\xbf\xb4fzf\xa80\xf1?\xff\xe1\x0c\xce\xbc\xda\x98\xbf|(r-I\xac\xf0?\x8a\x15\xa1Tx\x10\xa0?\xde\xd2\x1b\x88\xfb$\xef?\xebC^\x82\xa5d\xa0?`\xfcM\x086\x8a\xef?\xfc\xb9\xce:\xaan\xaa\xbfEs@M\x19a\xf1?Aw\xae\xd0\xd3\xa6\x9a?\x07pYv\x182\xed?q\x1b\xdcTJW\x9b?\xe2\xef\x11\xe4DY\xf0?\x8e\x12\x9c\x8b\x9e\x8b\x84?\x94\xff\xc0\x08x#\xee?\xa8\xf6+_1\x1f\xb3\xbf\xe0\xdf\t\x01\x19\xd1\xef?jH1%+\x1f\x95\xbf\xe3\xeeik\x8c\xdf\xef?[\x10\x1a\xf7!\x12\xc6\xbf$\xab\x91`\x7f\xea\xf0?(\x84\x049\xc4\x91\xc2?\xbe$\x9a\xe6\x82w\xea?\xa3e@-;\x13\x89?v\xa2\xbeR\xaf\xa1\xef?\x165\x9d\xa4\xd74\xa2\xbfT3cpKY\xf1?\xed\x0bc0\xfd\xd1\x8c\xbfy\xb7\n\xca\x08"\xf0?P\xa9\xa9\xe6\x10\x08\x8d\xbf\xb5G\x90\xc3\xda-\xf0?\x80i\x80\x1e\x99\x1b\x9d\xbfk7!\xd3{9\xf1?\xccS\xe9//\'\xa1\xbf\x07\xd5\xf9`\xd6y\xf0?n\xc7i\xb7\x97`\x94\xbf\xc9\xeaw\xb0X\xc0\xf2?b\x89b\x19\xc9{\x9b?g\xbd\xfe(\xa7\xfc\xee?r\x82`\x10\xf1\xe6w?\x1d\xfe"L\xdf\xa4\xef?Y\xf1W\xfac\x90\x8b?\x91\xc7K\xe1\x1f\xdb\xee?\xc5\xe9UJ\x03\xbe6\xbf0\xd5\x8bE\xd1\xed\xef?\x8f\xb6\xb2y\xe2\xd7\xab\xbf!\xa0\xbb\xa2\x17\x8e\xf0?\xc0\xfb6>"\xc5\xa3?\xa7v@^\x97t\xee?+\xff\x85\xaf\xea\x85g?W4\xbf\x9cD\x93\xef?\xe3\xa9\xeew\x1b\xc3\x91\xbf\xb5a9\xa7\x86i\xf0?\x1f\xd6<\x07m\x12\xa5?V~!\xe97C\xee?\xeex\xf8\x1e\xe35\x9c?\x08z\xc8q\xf1\x8e\xee?IO %y\x00\xcc?\x05\'4n."\xe8?\x90\xc4fc\x00\x15\x9f\xbf\x02\xa9\xa0z\x10\xb7\xf0?\xc4\x11\x05/\x8a\xa8\xaa?X\x99\xc9\xa5\x0e#\xf0?\xff*\xb9\xb8\x9f\xb6\xa0?\xfb\x15.m\xf2X\xf0?\x12\xf5\x98\x8b\x19\xd1\x99?\xd4h\x15\xc7\xa0\xe0\xee?GyE\x01\x85\xd2a\xbf\xe3\xc0\x06\x1f\x0b\x02\xf0?\xce\xdc\x90\x0e\xad\x10\xd2?\xc2\x96bAl4\xd2?r^n\x06\x07\x91\xa8\xbf\xe0\x17\xd8\xb6x\xc9\xf0?\xd5U;C\xa9\xe2\xb1?E\x0c\xbf\xc1\x8dl\xed?'
p33
tp34
bag2
(g3
(I0
tp35
g5
tp36
Rp37
(I1
(I2
I247
tp38
g12
I01
S'Ot\xf6\xc5M\xdcN?\xbe\xa4G\xde\xe2\xfa\xef?hXi\xb4[\x9ex?\x0bo\xfd4GM\xf0?,fj^\x03\xfds\xbf\xa0l\x91\x95\xf4\xb4\xef?\x84dN\xda\x06M\xb5\xbf\xbc\x9b\x8bIjZ\xf0?\xc8\xcd\xc4\xad\\\x9e\xe1?7d\x9c\x94W\xed\xe8?3d\xc8\xd9\xf97\xa3?\x80\xc6\xe8\n\xdd\x08\xee?\xb1\x91i\x7f\xbf)o?\xeb\xd5\xf8j\x80#\xf0?\x1f\x82\xa8t\x9eY\x8b\xbf\xef\xa7&\xfe\x1eu\xf0?\x14\x90\x0b&\x88\x01\xc9\xbf\x8aX\x10\x9c\xb2\xc4\xf2?\x90\xa9\xf5\xfd3\xca\x90\xbf2l\x8e1\xc0m\xf0?b\xe3\xd0\x17\x0fp\xac\xbfI\xd3s+k\xfa\xf2?\xaf\x94I\xfc\xe5^\x87\xbf\xa9\\\x9e\x12\xf3F\xf0?#\xaf\xb7\x96\xf7\xd5\x80?\x9b\xd5\xf4\xbf\xc7\xac\xee?3\'P\x8c\xac\\\xb6?1~4\xc3N\xf8\xea?\x83!\xe7\xf2\xba\xa9\x97\xbf\x10\x99\x0e\xe8\x08\xfd\xf0?Y\r\xd2\x9d\xbc\xfe\x91?\x96\x1a\xbb\x18!\x9f\xee?\x1b\xf6\xbdy\xf0\xcb\x8a?_$\x95\x89\xb2I\xee?\xac\xed\xb7DcbJ\xbf\xfaI\x99\xed\xca\x91\xf0?\x8e\xc8\xc7\x9cnE\x88?<\xdf\x84\xa3\xfd\n\xf0?\xfb\xea\x90e\x9e4|\xbf};7\xfa2\xdb\xef?\x81\xce\xa9\xf7\xa4\xff\xc1?~5\xc0\x97,l\xeb?\x18\x14\x84\x7f"\xb2\xae\xbf.=GA\xa6X\xf0?p\xc1O-`\xd6\x8a\xbfh\x98\xdc\x184\xa1\xf0?6u\xf2\xb4\x9c\x85\xdf?\x1e2\x9ay\xaa\xbc\xdc?\xdb#}\xb2\xe0\xcf\xa5?\x1d<wT%I\xee?g\xf5\x8c\x13\xdd\xb4\x90?\xd8+\xb8\xa7?c\xef?\x83\xf0\xa6\x95\x11\xe0G\xbf\xa2\x99\x04{?\xaf\xef?>\x83\xe6\xd3vY\xa3\xbf\x97\xf8\xf2\x87\xb6\x19\xf1?MTS\xb3\xb0,\xb2\xbf\xfeA\xe9,\xb2\x83\xf1?\xbe1;\xff\'4h?\x91\xce\x93\x13\xe3\xc3\xef?\xfe,Q.\x06\x03\x82\xbf\xba\x91d\x9ah\r\xf0?2\xb7\x94\x8b<\xe6\xa9\xbfR\xc4l\x9d#\xc5\xf0?8Q\x1e\x88\x08\xf3\x85\xbf\x17r\x12\xc4\xb5%\xf0?\xd2\xe3\xe6\xd7p.\x85\xbf\xa8\xa8\'\xa8B\x8a\xef?]\x1cm\xea\x8bnz?\xf86 \xd4\xb0\xad\xee?_\xaeuS\x1f\xf7\x1c\xbf#\x05\x17({\xfa\xef?\xe1\xde\xc2\xe8\xa6\xb0B?\xe8`\'\x91l\xb0\xef?\xca\xc1Y\'iWc?\xe88S\xbd\xf1J\xef?\x170\xd4\xea{z\xa3?p\xbf\xd5\x10\x8f\x8c\xee?\xd5\xe0\x8c\x80\x97\xab\x7f\xbf\x8d\xf8\xa2\xb6\x99\xb9\xf0?cQ2\r1\xef\xbc?\xb2\xa5%\x1b\x11\x05\xec?\x80\xba"\x9aKiz\xbf\x83\xe5`\xdcy\xe6\xf0?,\x17\xcd\x9a\xe8\x7f\x91\xbf\x0cG\x04~\xa4a\xf0?0GL@\xe0\x12\x86?\xc6\x83\x99\x0bI#\xef?4"^m\x13\r\x8f\xbfJPhR\xc3n\xf0?^G$\xfaT`\x83?9\xf2\xb3*\t\xea\xef?\xd8$m\xb8\x93K\x8b?\x9e\xf3P0\xd5A\xee?\xb8\x11\xc0\x1c\xe0e\xb0?4\x9d\xc28Sc\xed?\xf4\xb2ho\xb8@\xa4\xbf\xe6\x96 L\xd8\xd7\xf0?\xb5\xe4L\xe98\x87\xaf\xbf\xee>\x97P`V\xf1?\x0evK\xc5\xc60\x9c\xbf\x07%:\xc0\xc8V\xf1?M{\xed8\x85\xbd\xa7\xbf5\xbbi\xbe\xe08\xf1?\xdb\xf5d\xd6;s\xa3\xbfK\x966\x1dB\x8b\xf1?\xa8\xa6\xfd\x18\x00\xafO?\xeb\xe0|\xfd\xd7\x92\xef?D\x19\x99\xb95c\x93\xbfi=\xda\x1e\xa5]\xf0?\x10\xb0\xb8\xd0KJ\x82\xbff\xad\xeb\xf9\xfa\x81\xef?:?>\x99ug\x8f?\xa1\x19\xdb\xe2\x81`\xee?|\x14\x87\xc7\xd9\xed\xb4?\x90 \x97\x9c\xcfV\xf1?^\xbd6\xd6\xf2\xc5~\xbf\xb7q\x7f\x96\xf6(\xf0?Y\x02\xb3\x94\xfd,\xa4\xbf]\xe5s\xc1-\x82\xf1?|\xbf\xa4L\xb1\x1c\xba\xbfbYD%\xa3\x10\xf0?\x07\x00\xff\xd4@)\x88\xbf\xcd\xe4\xe6m\xe7\xa5\xf0?\xb7\x9f\x86U\x1a\xb9\x80\xbf8\xc3G\x10\x0f*\xf0?\x16\xcc\x83\xed]\x1b\x84\xbf\x91\x87\x91\xb5\x15M\xef?\x11\x9a\xe7\xcc\xd0\xc5\xb1\xbf;M\xcc\xb4\x9fu\xf1?w\x97%\xad\xc9\xe4\x80?\x10{\xcb\x17c\\\xef?k\xea\x0fD\r\x08q\xbf\x0b\xa2\x0c\xb4x\x82\xf0?(\xbb\xff$\xe7\x15\xb1?H\x9a\xdd\x89\xa5\x1d\xee?\xb9C\xd2az\x8c\x89?\xbe\xa7\x07\xa0\x11p\xee?\xc8\x92\xf2\xd9\x9e\xb5\x80\xbfQ\xa3\x84\xbeOb\xf0?pZ\xb7\xa7Nww\xbf\'\xa2\t\x11\xa8|\xf0??\xc3\x10\xeeP\xcf\x93\xbf\xbfU\xb6v\xc5|\xf0?8\x9e\x9f\xdf\xc3\xa4\xa0?\xad1 \x80\x1a\x12\xf0?4\xc2\x17\xe0\xb3\xdas?\xe1\xc7\x99\xcec>\xf0?\x08\xe3G\x8dS\x9b\xa5? xt\x82\xef\x03\xef?h5p\xc2\xa52\x88?\x9f\x0b\xb2\x98\xf6a\xef?\xac\xb6$\xffF\xa0\xa0?r\x8c\xc3\xde=+\xee?\xfc\xdaIS&\xc9v?S\xcf \xeb\xbe\x1a\xf0?s\x15\xa1C\xcf\xf9\x92?\xc9\\eMl\xd6\xee?\xff\xda\x8f9\x80\x9b\x8d?\xdd1\xb0x\x8f\xb6\xee?G\xda\xf3#\x1c\xe8\x93\xbf\x18-\x12E\x1f\xa4\xf0?=Y\xad\x98NZn\xbf\xc2\x8f\xf3\xd7\xb6\x0b\xf0?\x97Oz\xea\xb0\nQ?\xe7o1\xc3\x89\xaf\xef?W]6\x0e~y\x87\xbf\xc6a\xe9\xcay\x9d\xf0?Y\xc3\xed\x1f\xa1 \x83\xbf\x97\x98\xa7\'\xf4\x84\xf0?\xe9\xbc*\x99\xb1\xc7\x89\xbf\x9c\xf0|\xdb\x08\xe2\xf0?\xdaY\x90g\x94\xb4\xd3?X\x1e\xdd\x81j\x1a\xec?,\x11\xd2\n\x8b\xe7\xad?\x92\xb3\xc7\x14\xa4\x8c\xeb?q\x1adV\x89\xab\xd1?\x1a\xcdMi\xde\xe6\xe8?\xba\x00\x02\xd1\xc7\xc9*?\x10I}\xd2;\xe5\xef?\xd1p\x83=\x06\xa9i\xbf\x0chRI\xbf\x0e\xf0?\xecGieb\xd5\x8b?\x83\x8b\xaf\x18\xcf\x9c\xee?Pg\x9e(\xfe\\\x89\xbf\xf3J9\x81\xc9p\xf0?\x99m\xcc\x95\x90\x998?=\x0c\xc22#W\xf0?b\xd8\x0c\xad\xe6\xde\x9d?\xfad\xa8\x18N\xc3\xef?OR\xa2\xab\x0c\x81\xad\xbf\xed\xb4\xb7fP`\xf0?\xf2\xe2\xb3\xe1\x82\xdd\x86?\xe1\x8d\x9e8\xe6\x89\xf0?\xa4\xb7\x97&\x13tq\xbf\x9e\xcf\x18\x1b\x80$\xf0?\x8e\x87$_\xfc,\xb5?\x82\xdbw\x1b\xcd\'\xeb?\x1c\x9d\xd9,\xbb-p\xbf"\xa2 \xd6#\x86\xf0?L\xb2\x1c\xab\x13\xfbq\xbf\xe7\x18\xe2nL\xfe\xf0?\x86PzYg\x9bL\xbf\x05G\xc9\xd3\x9eG\xf0?\xc1\xb9\xdd\xda53\xa3?\xa0).\xb2\x7f[\xef?\xc1\x9a\xd5K\xdc9\xaf?|o\x8f\x9a\xb4\x8e\xef?\xe3\x06$d3)\x7f?\xe6\x07\xd4aF\xda\xee?\x8fE7u#?f\xbfB\xeb{.\xc9\xc2\xef?\xc6\x85)\x95\x11\x82d?\xccU\xf3a9\xbc\xef?@\xe4\xcbZ\r\x83\x88?9\x16Z\xa7\x9c\x03\xf0?L\x92\xfb\xe2\xcb\xec\x82?\xfb`sh\xdc\xbc\xee?\r;\xc8\xe5bm\x85?\xdc#\xa7\x7f\xd0\x9b\xee?L#\xe6X\x91\x01\x9c?\xd8\xcb\x9e\xf5\xab\xf8\xee?,\xf9XZ\xa0I\xc3?\x15\x85\xadc\x15\xe4\xe9?\xdf\xa4\x1c\xd4\xf9Q\xac\xbf\xb7\x90PX=9\xf2?\x1f\x91&\xe3\x8ar\xee?,\xa9H\x94^T\x8f?$\x0c\t.\xfb\xfcq\xbf\x03?\x80k\x1a\xd7\xef?\xbb\x13\xa7\xbf\xf4\xedT?\x87\x9aruf\x8b\xf0?{\xe4P#>\xb1\x7f?\x8f\xbc\xf5\xadb\xe0\xef?<\x15\x18%\xff\xf5\xa7?\t\xe8\xf4(\x8b\xa9\xed?\x08KSOv\xccQ?\xd59;\x0c;\xcb\xef?(\xa3\x8b\xaa\xff*|?wz|39\xd4\xed?\xd0t\\\xa1)D\xae?\x85\xb0\x8a\'\x16\x0b\xef?\xa8\x95v\xff\xcc\x80j?*\xf4\xd1#6\xad\xef?\x9dU/\x90\xcc\xf4\x98\xbf]M\'\xd4K\x10\xf0?!\x01\x86340\x86\xbfW\xe0E0\xb0Y\xf0?K\x1b\x93\xb5\x10\xbb\x96\xbf\x10\xfd\xf2T\x1be\xf0?\xedxx0g\x0cQ?\xfb\xc2\xd7\xb6\xa3\xd2\xef?\xbf\xe6\x86\xadZ\xdeq\xbft@b\xe6!\xec\xef?\xf5t\x8d\xdc\xcaJ\x8d?O\x92(>I$\xed?S\xd1\xf2v\x80/\xae?\x1er\x94\x88\xe9\x12\xec?\x00\'\xd6\xbb\xbc-\x93?\xee\xa1:\xb1\xbc\xa4\xef?\xe3\xe0I\xbf\xe6sk\xbf\xf6\x8c\x0b\xc1\xb5\x0e\xf0?\x15\xdb\x98\xb0/Z\xa2\xbf\x0f\xf1\x7f\x9a\xb3Z\xef?#\x82\xba\x8c\xbc\x1d\xa2?y\xb0\x90\xc4\xd7\xfc\xed?\x89\xca\xdf\x167\xe3\xa0\xbf\xd0\x1d\xabx\x13S\xf0?\xb1\x98blDb\xb6?"bZ\xa1\xe9\x8d\xec?\xef\xcf6f\x08\\\x94\xbf\xa2\xab\xd9\x82\xca]\xf0?\'\x9e]\xd1\x96t\xa5\xbf:\xe1\x92X\xc4\\\xf1?\xe28\xd1\x16[\xd4\x93\xbfV\x83\xd7\x1f\x7f\x15\xf0?*&m\x1ae\\\xb4\xbf\x87@&0\xf4\x96\xf1?3\x8e}\xf2\xb7J\x84?+\x97\xb7k\xe2\x01\xef?\x1b\x0bJ\xf4\x0c\xabi?\xf6\x010IZ\x9b\xef?+\x87\xc9\xf2(o\xa9\xbf\xdfF\xf4B\x97\x98\xf0?\x1eL\xb2\xb5e\xb8\xbd\xbf)\x9c\xc3T\xe5Z\xf1?\xeb\x8a\x90ECr\xb8?\x95e\xc8\x84_\xdb\xec?I5d\x80oV\xd7\xbf\x96\x15\xaaWu\xa2\x07@\xe0\x8bo\xed\xe0\xcb\xbe?\xb6\x16\xbbX\xffw\xed?\xc4\xe2\xa2\xb4\xf1Cf\xbf\xae\xa3"\xa6\xedV\xf0?mC\xa3\x12\xf8\xe8\x83?V\x00$\x0e\xd9\xa0\xef?\xa4A\x9f\xb6\xc6\xf2\xab?i\x89\x1a\x10s\x87\xee?\x9dI\x89\xd2\xddC`\xbf\x7f\x1b\xc8\xa0\xc7\xc1\xef?y\xfb+\xa8\xeaT\x85?\xb3\xd8n\xb2B<\xef?\x89*\xd7\x1f\xc9B\x86\xbf\x1e\x91C>]\x11\xf0?\x8bn\xee\xed\x04\xeb\x99?N_c\xd7\xcbH\xee?]\x84\xd0\xad\xd4\x9a\xa3?-\x98\xb8\x07\x18$\xec?\x04~gY\x86S\x80\xbf~3\x1a\xbe\x994\xf1?\x15\xaa\xa5g\xa3j\x95?l\x06E\r\x9fN\xf0?\xad;\x13?I\xa6\x81?\x82|\xca\x93\x17\xed\xef?H4\xc8U\xbbE\x84?\xa0\x01\x0fq\xbe\xcc\xef?{\xd8\xef\x02\x9e\x00\xac\xbf\xa09\x8bL\x88\xac\xf0?\ne pc\x97A\xbf?\xdb.m\x10<\xf0?\xc6 \xdb\xc5$\x83\xac?q?\x1e\xd0\x7f-\xed?\x10\x0e\xe9\x12\x0e\xe85\xbf\xde\x06\xcer\xe2J\xf1?PY\x13Yr\xc8\xc7?\xbcoOK\x81D\xe7?\\\x17\xdc%\xe8\x82t?\x9a\x84\x88\xa9\xfc\xe1\xef?\x8f|\x95\xc0\x93!W\xbfU\xd5\xbf\t\xad\xd2\xef?\x92\xee\xbe\x8f\x9a\x80\x96\xbf\x04\xab$\x97l\x82\xf0?\x07\x83kV\x0c\xae\xab\xbf\x0f\x90\xd9\xe4\x9c\x84\xed?6\xad]O\x1d\x9f\xa2?p\xe6_t\x07 \xee?\xed\x15\x87\x1f\xb3u\xa6?R\xe3>\xe3\x99\xdd\xef?d\xe9.e\x1b\xcb\x93\xbf\xe9`\x87\xa2\x07\xcd\xef?\xf1[\xcf]%\xcc\x86\xbf9O\xc1<| \xf0?\xa6\x87M\xccZ\xe6\x97?A,\xefTF\xc5\xef?3\xd2\xe5\'\x87\x1a\x99\xbf\xbf\x06g\xdc7\xa1\xf0?\xf7\x9bB\xd69/\x8a?\xfc\xca\x98\xd8L\x02\xf0?\xfd]\xa4c1E\xb1?\xa2\xd6 \xcee.\xee?2\x07O\x83\xca\xd1\xc0?X-\xa0\x9b\xad\x91\xeb?\xe5\xed\x1fc$\x04y\xbf\xd4\xd5v\xab\x03n\xf0?\x94\xb7a\x9av?\x8c\xbf\xec\x1d\xd3\xe5\x8bd\xf0?\xe2\x12\xaf\xe4\x1e\rm?"\xab\xf25^\xbc\xef?\xeaZ\xd8P\x04*\x93?\xae\xa0\xac\xfalw\xf0?/pnU\x14\xfb\x8f\xbf\x8f\x0f\x1br<\xcc\xf0?\xe4\x06\xb7jsEI?\xea\xbf\xc9]\xb7\x08\xf0?\x9d\xf1\x81\xc6\xf9\x83o?4\x8b\xa37\xc2\x9c\xf0?\xc4\xec_x@\xc6\x8e\xbf{\x02Ez\x90\xf5\xf0?BT\xdf\x80\x9a\x05\xa6\xbf}\x08\xba<\xfcR\xf1?\xb7N\x10\xd4\x85\xb0\xa0\xbf=\xcf\xba\xdf\xdf\x80\xf1?C\xb1\xe1O\xec\x1fm\xbf\x85\xdf\xe1\x16\xf7p\xf0?\x14\x98\x7f\x1c\x16\x18\x94\xbf\xa2@\xd2\x80_\xd9\xef?Zc\x97\xe1=\xd9\x88\xbfw+\xa5\xd5\xe6g\xf0?3*57j7\xb3?4\xf9\xa4\x80\x9b\xb5\xee?N=\xc7\x1c\xec\n\x97?f\x9a\xadF\x1d\xe5\xee?\xe9Y\xb0\xef\xf6a}?\xc8\x1d.\xb1\xbf\xb5\xef?l\xc2F\x80?\xb8\x83?\x8f\x96S\xdfll\xef?@\x07p\xf5c\xfav\xbf\\\xbf\xd3\xe5\xa6 \xf0?\xd9\x06\xc8\x1b\xe9C7\xbf\x8c\xd7\x98\xdf\xfaf\xf0?U\x0b\xa5\xc6\xe2"\x95\xbfn?\xbe\xecSl\xf0?p@\x17V\x90k\x7f?oo\x8d#\x8d\x9a\xef?\xe7gD\x88\xe8\xbd\x92\xbf\xa3\xcfA\x17\xd5\x87\xf0?\xe2\xe3\xf5T\x04y\x8a\xbf1k\xdc\xee\xd3z\xf0?\xb1=k0\xf6\xd9\x93?\xf1N\xca\x8f$\xea\xef?\xb2\x14\xe7`\xd5\x99\xd7?\x95$\x03\xec\x07\xcf\xe0?\x80\x0b\x8f}0C\x83\xbf\x89\x8f\xfa\x84\xe0\\\xf0?3%\\\xb5g\xdc\x95?\x8b\xb1\xfb\xfb\x9bq\xee?3\xfc8i\x01\xd2\x81\xbf\x1f\xf8\xcd\xeb\xc7M\xf0?F\xff\x7f\x11\xcfx\xbc?\xe2fd\xbe\xba\xbe\xeb?\x8e\x83\xb8F\xedN\xa1?\xa2\xa4g\xae3<\xee?3K\xbfImuh?\x15\xa2\xcdg\xde\x0f\xf0?\xb1\xb9\xfbE\x85\xa4x\xbf\x8d\xadR]\x81\r\xf0?~<L\x02V"\xa9?\x18\x94:b\x06i\xf0?\x99\xf4B2\xa4|\xa7?>#\x1c_\xd4\x9c\xee?Q\xbcE=f\xdes?\xab\xf5e\xfb\x91\x01\xef?]\xc3\xa9\x8d\x1ce\xb1\xbfr21\xbc.C\xf1?\xb3\xf1~b\xd7c\x99?\x11i\xd2\xa8a\xed\xee?0 \xe5fDF\xa1\xbf9<\xe6\x0f\x88\x9c\xf0?\xf7%\x068Q\xd7\xa3\xbf\xc8@\xfa\xad\xe2\xf7\xf0?\xf1\xc2\x92.\x1deS\xbf\xda\xdd\x9b[?\xd2\xef?\xf6\xb4tf\xb9\xa8\xa6\xbfm\xdcJ\xd2\x0b\x92\xf0?f\xbd@\xbb\xc4\x98\xa9\xbf!\xd4q\xc9\xf6\x1e\xf1?S8\xca\\\xbfX\xa2?\x1ei\x03\xff\xba\x87\xee?\x05!\xce\xeb\xe7\xed\x84?7@\x91\xbaXL\xef?%\xd6\x80\xa9\x0f\x0e\x80\xbf\t\\\xe8\\\xea\x0b\xf0?\xc4z\xb1\xd5\x84-\x89\xbf\xd5Z\xe61\x03E\xf0?\xe1\xc7\xb0S\xd3\xccd?\x81\n\\\xa8\xbe\x93\xef?r`Z\xbc\xe3\xf5\x99\xbf\xd7\x94+@\xc6\xee\xef?Qx\xd3Z\tJa?\xca!\xf5DKn\xef?j\xe4\xcb\x84N(\x7f\xbf{;\xac\xde\xf5\xb1\xef?\x81O[\x89w[y\xbf\x89\x06J\xd47\x7f\xf0?\x02\x10e*\xcd\xab\x9b?\x16N\xf4\xb2\xec\xee\xee?\xd0\x08\x1c\x95\x84[\x80?qP\x1b0\x06\xa1\xed?\x12\x80\xb2\xc0*.\x1a\xbf\x95L\xce\xc5\xd3\x16\xf0?\x15\xd3\xe8\xa6\x9e\x8d\x96?\xa7\xe9\x8d:\xb6\xf9\xed?\x9c\xdeD\xbe~\xb8\x85?\x8e,\t\xf7\xce\x08\xef?\xde\xb3\x99!\x15a\xa7\xbft\xcad\xfd\xd2N\xf0?y{\xf7\xc4\xcb\xc5m\xbfO&\x00\xfc\x7f\'\xf0?\xc7-\xfd\xc6D\xac\x90?\xf5\xd3QN\xc3\x82\xed?\x8f\xeeF\xb2\x08{\x80?\xf5\xca\x1f\x16~\xc5\xef?\xb0=\xb5"\xc3\xcf\x82?\xd4?\xb9\xb9PF\xef?\x18\xd2CE\x0b\xbb\x88?\xd3\xe8\xbb\x08\xb5\x9f\xef?\x89,\xb9Tfy\x98\xbf\x8c2\xdd)\x99c\xf0?\xe9\xef\xcf\xfam\x1e\x91?.U+\x8a^\xdc\xed?A\xc2O\x94x\r}?\r@}Mtd\xef?\x9b\xdc\x08\x88\x16\xbb\x81?\x14\x04|=\xfe\xd5\xee?\xba\xd7\xc4\xc95\x13\x93?5D\\Y\x94s\xee?*\xb3V47\x02A?\\J\xe4h2\t\xf0?\x13\xdf\xc3_\xdf1\xa4?\xf0\xce\xd8\xb64+\xee?v\x83\xe6\xc6v!\x9d?\xe0\x04\x03\x04E.\xf5?\xb3\xe5\x83\xab\xc7V\xa5?\x86s,TZ\x05\xec?'
p39
tp40
bag2
(g3
(I0
tp41
g5
tp42
Rp43
(I1
(I2
I249
tp44
g12
I01
S'\xe6\x1eW7M\xc4\x86\xbf\xf4Pz\xd7D9\xf0?\xec3\x9f\xf0\x10ED\xbf\xc48\xad\xa7\xcb[\xeb?\x92\x9e)\xc9_;\x9d?Q\xf5\xeaHm\xba\xef?@\x84h\xbe^\x0fr?\x93\xa0\x8c\xb8\x81"\xf0?\x1c\xcb\xa4\xf8\xd1o\xa1?\x15\x1b\xcd*\t\x0c\xee?m\xe6\x870?g\x8c?Di\x9f=F#\xf0?\xb5G\x1a\x90\xbf\x8e\xac?\xff\x11\xa7\\\xba\x0b\xec?i\x01\xef\xa5\xfe\xbbi\xbf~\t\x03\xf8\x82\x8e\xee?\x17\x8d\x12\xc6\xfb|\xa1?E\xf07\xf098\xed?K\'\xc2\xf6\x9cz\x8d?\xf5\xb9\x11\x01\xc8\x16\xf0?)V\xf3W\xc3\xda\x84?h\xdb\x14\xda\xd3\xed\xee?\xa1#\x98\x0fi\x1b\x97\xbf\x0cL\rU\\"\xf1?\x1d\xb3mz(:\xb3?PG\xd2\xaaZ\xb1\xea?\xf3a\xc6\x13/\xd4}?@T\x89J]z\xef?\xb8\xa5\x95\xef\xa33\x91?^\x04\xa8\x0e\xe3H\xef?\xc8?\xfe\xf6\xb9\xb4~?\x94\xecG\xb3\x19\x03\xf0?\xeb\xb7\xe9\x943\x9b\x90\xbfM\xd60\xfc,[\xf0?\x850S\xbc\x9dA\xaf\xbf\xf0\xc2\xed\xe6.X\xf1?\x07p\x03\x80\xeb\xbc\x90?\x15\xb2\x88\xa4n\xab\xed?\xf9\xcbO\xa9\xda(\x8a?BA\x13+\x9a=\xf0?\x15w\xaa\xa1\xa0FY\xbfe\xf3\xa9$\xf8 \xf0?\x12\xdc\x96\xb1\x85=\xab?{w\x1c\xc25n\xf3?b\xb3\xa3\xde\x19\x08{?\xbe\x85\xf7v\x03\xd1\xee?J\x18\xf2\xb7\xe9\xb3\x81\xbf`\xbf\xcc\x7f\xf9\xad\xf0?<\xc8\xd3!\x1d\xf0}\xbf\x91Y\xe9\xc9\xb9\x03\xf0?\xac\x1c.\x10\x82Oc\xbf\xec\x86\x8a^\xee\xec\xf0?\x16\x94\x94>\xd1-\xc1?\xfc@\xea{\r8\xe7?\x08\xbc\xab\xe6\xa9\x13\xa0?\x12\rC\xf102\xe8?5\xad\xcb\xb0qR\x9d\xbf\x89\x80`\xf8W\xc4\xf0?L2EX\xfa\x9bW?\xf8\xd9q\x05\xe4;\xf0?\xac\x84\x92\xa3\xbf(\x8b\xbf\x19\xa8\x0c\xc6H^\xef?\xfc\xe5#\x90e\xb2\x96?H\r\xf6\x8ctJ\xef?3`kr\x91\x1b\xbd\xbf\xb1\xd5Zuz\xe5\xf1?N\xa5\xb8/\x85\ty\xbf\xc40,\xb4N\xb1\xef?M\x12\xbf7\x99\xb0\x82?\x0c4\x1a\x8f_\x9d\xef?\xb6g\xbe\xd2\xff\'y\xbf\xc2\x1d\xd5I\x01\x06\xf0?_\x067\xe3\xf4h\xb0\xbfg\xb9v3\xc5\x7f\xf1?\xd4\xc1\xae\x95\x9d\xbf\xa0\xbf\x13\xb8d\xc3\xa2X\xf1?\xdav\xf8\xd3\xbe\xf4{?N\xdfuB\x80\xe4\xef?\xd6K\xc8"\xeb3\x92?,o\x8dpW\xc3\xef?d\x82\',/\xd0\x93?\x02\xe7\x11\xe8Y\xc5\xee?|\x14\xd3N\x9e\x99\x87\xbf\xc8\xd8\xb3\xef\xcc\x93\xf0?\xa5\x12V\xff\x81$\x86?\x81\x06\x8c\x15\x1d$\xf0?&\x05\xf2\'\x02\xc1\x81?y\xdc\x1b_\xe1\x90\xee?*o\xff\x98\x08K\xa4\xbf\xb1\xa1\xfaf\x89\\\xf2?\xad\xcame;)\xb8?\x07\xac\xdd\x08\x0b\xa4\xe4?i\x92.\xeeH9q?\xecV04L\xeb\xef?M\x96\x92\xffGl|\xbf\xca%\xd9\xa96B\xf0?6C"\x84\xb2%\x83\xbf\xc2\xd9V\x03\xe7y\xef?B \x14Dn&\xb8\xbf\x93[\xf0\xba;5\xf1?\x12;M)\'\x04\x90?FGfy\r\xc4\xee?\xfe\x06\x17\x85VM\xb1?\xc9\xc9 C\x12\x85\xe7?\x8b\x8d%@\x1aQ\x90?u=\x99\xf2\xaaU\xf0?\xc9\xb04\xf9\x17,\xbd\xbf\x8en\xbcv\x05\xb9\xf2?\x84\xa4S\xef/*\xb4\xbf\xa7\xdf\xaa277\xf2?\x89z\xb6\xd4\xa93P\xbf\x84\n\xc9\xb7\x1a\xec\xe9?\xc1BR\x06J\xfb\x90?&7`\x97r\xc7\xef?\xcf\xaf\x9a\x82R\x82\xa3\xbf\x92\xaa\xde\xbb_\xc3\xf0?#5w9\x8a\xa6\x84\xbf;}\xf4\xdfDu\xf0?\x87E\xb4]>\xbb\x9c\xbfP\x80\xad\x1e\xe7e\xf1?lvA\xa8|\xbb\xac?\xae\xbe\x93\xa7\xcf\xf6\xec?4\x9c\x91\xc9D*\xa4?v\xd8\x8b^\xa3\x9c\xed?\x8d\xd7\xbf\x92\xdca\x84?\xf2wa\xcft\xf9\xed?\xfa7\xb0;\x16\xfb\x94?\xfc\xbf\xe7\xe8lx\xee?u\xbd\xeaH\xd6=\x90\xbf\xf1\xcf\xfa\x9e\xbe\xbe\xf0?\'\xaf`A\xe0\xe5\xb7\xbf\x15k\x986\x18\xef\xf0?~%\x18!\x8b\x12B?R"\xe5E\xf6l\xf1?\x19\xd6o\xe8>\xaa\x95\xbf\xd4\xa7\x1f\xb0c\x1f\xf2?]\x86\xd5B\x1d@\xb0\xbfx;\t\x85\x99\xbf\xf0?\x0b0k\xbcp\x92k\xbf\x96J\xb4\xb4\xb7\xab\xf0?-\\\xc3\xe0\xb0\xbf\xb4?\x13\xa0\xd3_\xa78\xee?\x00^\xc3\x82\xec/\xa3?\xaf\x06t\xc9\xdc{\xef?\xf7\x00\x9c\x9f\xdcY\xb7?\x92\x87\xe1k\r\xa8\xea?\x11$ee\xdd\\E?\x1e\x11\x1a\xa2C\xf3\xef?\x9a%\xa0\xe1\x89\xd8\xba?\x99q\xf9\x00\x1al\xed?\xf3\xc6\xea\xe5:o\xaa?Ew\xc4E\x0b\x96\xed?\x0f\xbd1k\xad\xcb\xa1?\xc7&\xce\x1e\xe3\xc2\xee?\x1f\x0b%g\xcb;n\xbf\xce\xcf\x00\xb1`\xcd\xef?\xb2\xf3B\x92g\xa8\xa2?\xa0\xd6)\x91\xd1\xd5\xec?\xf2\xd0g\x82\xf3\xbb\xc1?\x89\xdb\xfa\xfd\x8a\xf0\xec?b\xda\x9b\r\xca\x82\x82?B\xb0\x95\x0f\xcc\xe6\xef?\xc6\xe8&)\x7f\x7f\x90?P\x15\x04\xca\x8d`\xee?\xde\xb7\x80!\x93\xc7\xe1?\xaf\r\xae\x91_\xed\xd3?*\'X@w\x8a\x89\xbf\xc7\x97QkE\x06\xf0?LT\xaf\xef}\xe4\x9d\xbf\x05\xcc\xde\xbb\xe1\x8e\xf0?\xfe\xf9\x07\xcd\xce\xe5q\xbf\x81\xd3{\x934Y\xf0?\xe3V:\xc1pt\xa7\xbf\x8c9h\xce\x07\xb7\xf1?\xbf\xa3S1\x0c\xc2\x85\xbf\x18\xc1e\xa6\x18o\xf0?\x03\xebiM\xb5\xfd\x96?\xaf\xa1`\xf3@\x1f\xee?\xb1\xb2\xb6\x89\xa4\xb0\xb8?\xf2\\\xe7\x9aU\xb2\xec?u\xcd\x8f\x0b\x92\x9d\x89?@\xcb&@\x93\xb6\xef?\xac\xb9\x83\x1b\xd8\x05\xac\xbf4\xed\xf6Y\x04\xab\xf3?\xd7%\xb2\x85#}W?\xb8\xa8\xe0\xa7n\xd7\xee?\xe0\xc4{\xa6\xcd\xb5\xa0?\x15\x01\r\xfb\x02\x19\xe8?\x05\xee\n\xc1=\x08\x9a\xbf\x04\xde\xa7\x8e\xf1a\xf1?n\xe7+@\xe9L\\\xbf\x80\x0f\xc8(\x05\xb7\xef?c\xb6&\xfe\x1b\xb8\x99\xbfw\xce\xdc\xb6\x91\xb6\xef?\x95>.B\x87o\x90\xbf\x02\x0bi\xb7\xae3\xf1?Z\xd2\x19\xeb\x85\xdb\xa4?\xd4\nn\xbcG0\xec?t~\xc6\t\x97\xdd\x9b?he\x89F#\xff\xf0?~c^\xd0\xc7\xc9x?\xffC\xfa\x07\xc0:\xf0?\xff\xd58K~\x8d\xa7\xbf\x17d+0b\x19\xf0?\x9a\xe0E\x11\xe9\x8a\x9c\xbf\xeaE\x1a\xe7m\xd0\xf1?\xd4\xc9d\xdcL\x8a\x90?`\x189|\xdf#\xee?\xb3\x1e\xe3\xe2\xe2\x17\xa9?Ja\xf7\x11\xf9{\xeb?\xc1\xf1]\xf1\xc1\xfb\xc0? #\xce\x98\x155\xf0?cP\xe28\xfc\x0fu\xbf\x9c\x82$\xe7\xd3\x0f\xf0?\x07D$q\xd2\xf7`\xbff%n\xba\xc1\xf5\xef?+\x96\xfe*\'\xfe\xa5\xbf\x87yo\x05\xd5W\xf2?+!\xd9\xafQ\xc5\xb1?\x8e\xae\xbb\xf6\x8cS\xec?\x1a\x1e\x9e\x1c\xb2\xfa\x87?#W*\x86\x85)\xf0?\x1e\xf2\xc5\xaf\x961\xa0?\x0b8\xd2?!\xe3\xee?L\xfaP1\xa1\xb1\x98?A\xe20\xda\x8f\xf4\xee?\xe5\r+\x8b:\x95q\xbf\xc1\nS\xb4\xdd\x1e\xf1?8\xab\xf9\nL9\xa6?\xe1\xff-wL\xc0\xf0?8\xae%\x83+\xc4i\xbf\xe9\xd2\x91>\xb5I\xf0?\xe0\xae*\xe4\xfdg\xa3?\x1c\xaaMGj4\xef?\xd8\x9f#J\xde\x91\x97\xbfs\x98\x000\x05\xf1\xef?\xb3f\xf8\xee5:\x86\xbf\x19\x12\x8a\x1cJ|\xf0?`\'\xc6n\x8a\xbd\x8c?YX\rF\xacQ\xef?\xe0*z\xcb\xe9\xc4*\xbfC\xd0\x1a\xd5o\xd5\xef?\xba3\xd1\xf5\xb0\xeer?P<\xe1Q\xfc+\xf0?\x8e\xfa\xd4!\x1a\x13\x9b\xbf\x1c\xc6\x9b\x8dc\xff\xf0?\x1d\x949\xbc\xf4C\xb6?\xc7@\xaa\xcf4j\xec?Y\x06l\xe0\x85\xe5\xb0?\x8cU\x02\x05ZU\xeb?\x82jL\xcdG\xd2\x97\xbf\xe6o\xcb\x88\xf1\x9c\xf0?\xa8Z\x11\xae\x00H\xc7\xbf-\x07\xca\xf1\xf1\xad\xf2?\xee0pt\x1c\xb8\x7f?\xf8LX\xa8]\x94\xf0?>(\xd8\x1b\xc4ox?\xc8_ \xc4Dm\xf0?\xbf\xb0\xb3F\x0f}\xaa?R\xf9\xfck\x8c\xfd\xec?\xe5?-\xd7\x19\x03\x9e?5\xc3\xa7x\xea\xdd\xee?p\x9b%/\xa3J\x94\xbf\xf8+\x84\xf5\xc5\xb4\xf0?\xdc\x89(cd\x82z\xbf\x16:{\xdf\x12T\xf0?\xe2\x1e\x86\xac\xb5\x11~?\xc8+D\x1eD\xf5\xee?\xa3F"R\xb4\x97Z\xbf\xfe\x1b\x93^\x95|\xef?\xa6\x7f\x9c\xd6c\xa0\x92\xbf\xdc\x0c\xbd\xfd\x02$\xf0?N\rw\xa6\x0b\xd8y?t\xe8k\'\xef\x99\xef?\t\xbe_+z\x80\x94\xbf9\x8doM\xec\x8f\xf0?\xb4\xd8\x9c>J\xe9u?\x8d\xd9\x81\xbc\xc4z\xef?5\x9e0r<S\xac?\xc7\xfa\xcd\xed\xdd\xc8\xed?\x02H\xf2\x16\xee\xd2\x9a\xbf?Z4\x8f?\xb8\xf0?\xb5\xc9M\xd0\x19\xa6\x88\xbf\xa0\x9b\xaa\x1fA\xfb\xef?Wm\xbe\xf0u:o\xbf\xee\xf6\x86\x15\x07N\xf0?\xf6\x99\xd6\x0f\xe1\xed\xa4?A\x96T#~\xe8\xeb?Z\xf8(\x0f\xbdL\xaa?Bc8\x06\xb0,\xec?\xdb\xb5\xf4\xf4\xfb\x81\xb3?\x9d\xaa=\xba K\xf0?\x02\xa2\x0c\x91\x03S\xa2\xbf\xb1\xd6R\xe1\x9b\xf0\xf0?B\x83\xb1\x16Ez|?d\xe9C\x16\xa3c\xef?\x1aS\xfe\xd3X\x8d\xac\xbf\xa7"\x18A\xe3X\xf1?F \xc1\x02-\x83z\xbf\xcc\xd0\xb3\xd4\xd4\x1c\xf0?/\x1d\x00\xder\xe7\x9d?x\x92\xaf\xad\xc1\xb9\xef?d\x93A\x08\x18\xde\xa1?U\x12\x18F\x8bA\xee?\x05\xad\xdc\x1c\xa3S\x0b?\x92\xb83\x87\xeac\xf0?\xeaE\xe6\x07\x03\xc0\xbc\xbf&\xab\x07\xc4\xf1\xa6\xf3?\xa2\x81?B\xcb\x86\x8a?\x985\x08^\x9fx\xef?\x92H\xdb\x9cWv\xa6?u\xea^\x16K9\xed?;fD\xd1\xd5\xbc\xba\xbf\x1eE\xccr\x85\xc1\xf1?\x00\xcc\xf3\x9197\xba?\x19\xa6\xe8X\xe7\x90\xeb?\xca\xc7\x1b\x0b!\x00\x9d\xbf\'\xa8K\xd1M\xea\xf0?G\xd6\xce\x81\r\x9d{\xbf\xce\xea\xce\xad\x1f|\xf0?\xddG\xcd\x8a\xf9w\x89\xbf0\xfa\xba9W\x01\xf0?\x82\x8b\xb2\x81K\xc2Q\xbf\xb6\xe6\xad\x1f\xd2&\xf0?t\x08@K:\x8a\xa4?\xaeo"BC^\xef?J\xea\xd3\xaf\x05\xfc\x8d?Fn\x97\xd8\x9dU\xef?\xa1\xfc3\xdaS\xca\xb1\xbf\x18\xfe\xc1\xb8\xdd\xb3\xef?\x07M\xbd]?\x10g\xbf\x92\x14\x8d\x99\xc2t\xf0?x<\xbdz\xf8X\x9f\xbfVdVR\xd63\xf1?q@\x0f\xb4\x0e\xf8T?\xe9`r\xd4\xb5\xbb\xf0?\xc3\xc8\xacY\x1cO\x91\xbfu[\x8f\x02l{\xf0?\x1c\xb3si\xd8\x9be\xbfo\x9f\xef\xa6Y\x93\xef?\x85D\x05\rR\x8a\x84\xbf\x99L\xc8\xd7|\xe1\xf0?\x87[]y\xec\r\xff\xbe\xbd\x1a\xf6\xfa\xe5\xba\xef?\x15]\xf1\x93\xf0\xe1\xd4?L\x8f\xcf\xbd\xe2\x19\xe6?\x84}\xb6\xe0q\x86h?;\x97\xfc\xbb\x91\xeb\xee?^<r\x82\xb7R\x80\xbf\x05X\x06\xf4_;\xf0?\xae\x84\xcc\xd9\xaag\x8f\xbfv|d\xb7ak\xf0?\x10$\xe2\xcb\xacq\xa0?\x8f\xf1\xb5\xe9\xda\x18\xef?Z\x0b\xf1b\xfc\xf3\x91\xbfn\xba\xa9\xd8[\xbf\xf0?~\x8fe\x83\xec\x1c\xb5\xbfW\x1c\xcc\x98\x01@\xf0?\x87\x92\xef\x0cmq\x92\xbf\x12gz\xc47\xc4\xf0?\xaaF\x1f\x93\x0e\x1e\x85\xbf\x84w\x8b\xf5\xca#\xf0?$\x95@\x94\t\xb9\x97\xbf|\xd0?=\xe9F\xf1?B6~\x95\x8cJ\x9c\xbf9\xc4\xde\xb3\xdc\xd1\xf0?H_\xf9\x1d\xf4m\x88\xbf\x02\x85\x9f\xfc\xf5\x99\xf0?\x1e\xca\x8er\x03\xfbu\xbf\xcf\xdc#\x85n[\xf0?2\x9b\xa4bq\x00\xc5?\x0f\x16\xa6\xb4\x9b7\xeb?\x9e\x9a\xbe\x93N2\x8b?\xf7|1\x8c1\x8f\xef?n\xe6\xcd\xca\xd1p\xaa\xbf\x95\x88\xfag\xd3\t\xf0?\xf9_W\xba\x85?\x92?\x0c\x97\xb3|\xbb\xe5\xed?e\xd3!\xf5\x08\xd5\x9a\xbfDE\xed\xfc\x88Q\xf0?\xb6\x19>\xbfp\x8by\xbf5\xe5\xa1\x9f\x89"\xf0?\x9b\xa4\xbd\x052]T?Ag\x89\xf8\xf4\xf8\xef?\x1a\x17\xafA\x18\xc3i\xbf\x9et\xbaj\xf9\x1f\xf0?\x9e)\xd3Q\x0b\xb1\x8e\xbf\xa2\x9f\x06\xe0Z:\xf2?r |3\xea\xb5\xa4?\xa2"\x04U8x\xed?\xfa\x97ZO\xea=\x8b?M$\x97\x9a]O\xf2?\x92\xd5\x15\xdd\x06\x86\x91?\xd5\xee|\xbb\x1a?\xf0?\x18z\t$\x11\x95\x88?\x90?\xd8\x0bS\x03\xf0?y(9\x87\xf4r\x9e\xbfC\xa2H}\xd4\x1a\xf0?\xd6\x01~\'1\x92w\xbfHt`\xfd\xdb\x88\xf0?d\xf8\xb3\xc0}\x04\xa5?t\xab\xf7L&\x13\xed?)\x1f\xa6\xb5\x84l\xa0?\xce\xca\x04\xa2\xbc\x15\xea?\x8b\xfcRIv\xda\x95?\xb1\x990l0\xc5\xef?R)<\x944\x82\xa0\xbf0\xc9\n\xda\xa9J\xf1?\xd5\x0e"\xcdJ\xf5\x8e\xbf\x07g\xd7[\x88\xd6\xef?M\xfa\xf6\x93K\x19\x83?}T|aw\xf9\xed?\xf2%f\x97\xf4\xdf\x92?o\x83\n\xa1w]\xee?\x86\xb8\x05\xfa\xb0\xb9\xa0?<s\xf3U5\x9d\xee?\xa1%\xf6\x95\x81j\xb8\xbf~\xeb\xbf\x90m/\xf3?3w&v)\xd5N\xbf>\xf31\xdf\xe9i\xf0?\xaf\xe7\xc953\xec\x80?\xcf\xee\'\x08\xe8\x0c\xf0?\\\x7f\xa3\xdd\xcej\xb3?[mxE\x85\xa3\xed?F\x1b\xda\x10\x1f\xeb\x93\xbf5\x9e\x99\xa9b5\xf0?Z\xe0Nx\xcc\x05u?V\'8\x18\xb0\x00\xf0?\x87\x84\xebO$\xd2\x88?\x08S\xad\xde\'\x13\xf0?.J\x93\xc5/R\x83?\xdf\x94\x83\x89C|\xee?\xe7\xa0CA\xa3\x92\x9c?\x97?\xa8\xea\xe1\xfa\xed?\x05\xd9\xa7\xa0\x15\x05f\xbf\xb3\xc8@\xb8\xd3}\xf0?\xc9\x16q\x1f\xfbD\xab\xbf(\xd6\xfa\x87]\x85\xf2?3*\x1fL\xbbQ\xa0?\xc5\xac\xf1\xbc\xe1B\xed?q\xcfum\x9ev\xb9\xbf2\xc3\xb4We\x89\xf1?\xa1\xce\x03E<\x9fz\xbf\x05\xeb"#VW\xf0?mz\xfdlt\ns?I\x0b\xde\xad\xae\xe8\xef?l\x08\xdd*\x1f\xb2\x84\xbf\xd3R1g\x82\x0f\xf0?\xaa\xe3\xae\xae\xac\xd3\x93\xbf2\xef\xbdV\n\x8a\xf3?A\xeb\xd0y!\xa1a? \xbd\x95h\xca\'\xf0?\xac!%\xc9\xf3V\xa8\xbf\xf1\xdb"Z\xef\x86\xf0?~\xad\xe90\xc1\xd9\x87?\xe9\xf5\x91\x17.\xf8\xef?I%z#1\x06s\xbf\t\xe4\x96\x14\xf83\xef?\xa4\xcc\xb2\xfd\x18\x93\x97?r\x1e\xaeCH\x9e\xed?\xc3\x99\x96\xe8?\x8fu?mJ\x84\xb3\x90\x01\xf0?\x02R\x07\x007,\x8e\xbf\xeb\xafWiUG\xef?\xa9\xa9\t\xfdK\x98\xd1?\xa4\xb6\xefJa\xfd\xe8?06\xc8_\xa2Pc\xbf\x95\x0fD\xaf\xc1\xcc\xef?\xa9\xc6`\xb7^\x82\x92\xbft\xdf8\x8d\xf3\x85\xf0?\xc2\x08\xa2\xcb\x7fA~?t\x05?\xfbQ\xa6\xef?\x02V\xa4\xe8\xfa\x8c\x80\xbfRj\xa6z\xfa5\xf0?\xd7(Oh?-\x82\xbf}s\xd4\xc3\x0e\x16\xf1?#\xb0f\xdc\xe9Y\xa2?\xa9\xfd\x977\x9eT\xec?\xd7\xa0 9k\xaf\xac?0\x99I:Hm\xe9?\xdf\xb7\xb8\x83\x9eJ\xc1?\x10\xbf\xfd\x15\xf70\xee?y\x08{\x8e\x80\xb3\x81\xbf\x94\xc7\x1e1p\xb6\xf0?\x13\xbd\xf4\x1dC\x8d\x8b?R\xbc\x90Y\xed1\xef?(\xd7)\xfb\xba\x07r\xbf\x1cM\x8e\xc4\x9e\xd6\xef?\x825\x93++\xa9\x83\xbf\xed\x89\xe3+T\xed\xee?\x8eW\xfa\x0f\x9b\x8c\xa5\xbfyb^fW\xd2\xef?<\xc6@\xbc\xe6\xd6u\xbf\x1e\x98\x88\xb8\xf4\x04\xf1?\xcf\xde\xee\xb3\x929\xc1?j\xb7\xc5\x00\xf3\x8b\xea?\xf2A\x14\xa7\x81\xfet\xbf\xce#qQT<\xf0?'
p45
tp46
bag2
(g3
(I0
tp47
g5
tp48
Rp49
(I1
(I2
I237
tp50
g12
I01
S'"M=\x1d\x8e\x89\xb2\xbfB\xf6\xed h\xaa\xf0?\xb6g\xef\x817\xb8\x84\xbf\xec\x87\x01%a\xc7\xeb?S:\x0fr|\x8a\xd3?1\x9d\xb5\xc8\t\x8c\xe9?U_\x04\x90\x020B?\x0c\xcf\x8c6\xdaq\xf3?\x91\xce\n\x91\x143\xa6\xbf5\x05\xf0\x1c\xf9\xa1\xf2?\xc1\xf1mzIB\x9b?\xeb\x15\xe3\n\x1c\xca\xef?\x84\xbe\xfe\xa4>:\xa5?D\xe4/|{o\xef?\x02\xd4\xed\x8e`Ha?^\xd6\x98\x16v\xb1\xef?\xe0\xb5\xb2\t\xfbh|\xbf\xaa\x8e\xd6\x9f\xffV\xf0?\x0c&\xf8]D/z?\x85P\t\xa6&<\xef?;#sM^T\xa6\xbf]Hb*g#\xf1?\xab\x9b\n@\x1a)\xc1\xbf\t\xf1k \xae\x86\xf3?\xda\xa0S\xcc\xe1\xf8|\xbfnv<k\xa7\xf6\xf0?VJ{\xa1\xd3*d?\n\xc9\x1a~%3\xf0?\x98\x07\xf4\xb7\xcd!\x91\xbf\x8d!h%M\xdd\xf1?\xba\x18#+r@\xa1?\xff\xf5\x90\x14\x12s\xf0?\xed\x82\xae\x0c\xb0w\x9c\xbf\xb9\x0b\xa1F\x7f\xd6\xf1?\x8f\xf6\x95\xf0EX\\\xbf\x08\xf6\xae,v/\xf0?\xe4c\x01\xbaf\x7f\xaf\xbf\x82b2"W)\xef?\xb9}Y\xee3\xc3\x96?V\x98b\xfb\xaeM\xf0?\x14\x91\xc4\xa8\x9c\x13t\xbfp\xd8\x018\x03\\\xf1?\xe1DB\xb6\xc8\x1b\xb2\xbf\x8c\xf23\xf3\xf8\xd5\xf1?\x90a\xb9\x06\x1a\x95\x95?\xc9L\x14D9\xb8\xee?\xa2/\x82\x0f\xce\xb0\xa0\xbf5b\x1eS\xc9\xda\xf1?+\xac\x14\xcb\xe8]\x9b?|\xc0h\xbc\xa3\xa4\xec?\xc2\xdc\xcc\xd6\x8b\xed\xa5?\x00Z\x99\xf3\x08\xc3\xed?\xcc\xf6\xee\x9e\xcb]\xc8?\x13\xaa!\x9d\xe4\xc6\xe8?\x01j\xea\x1a\xd6Q\x94?\x86T\xab\x01z\x1e\xed?.\xd5\x15\x84\xa5\x9a\xa7\xbf;\xe6\xc7\x82\x13\x9e\xf0?\xe7T}\xe6\xb0\xe3\xd2\xbf\xd3\xe1\xc6x\xf3l\xf9?9@\x9e6\xad\x90\x9c?\xd1\x85\xff\xa6\xc5\x8c\xee?u\xce[{Cd\xb0?>\xac|\x97\xae\x98\xec?\xc9\xe4\xf5jnG\x9c?\xd9\x0e1Za%\xf0?U\xb3\xdd\xb1\xee\x0e\x96?\xa1\x07h,\xc3\x16\xee?\xeb\xc6\x17x\x00\xfc\x88?\xff\x1a$\xb8\xdd}\xed?x\x01\xd7\xa3y_K\xbf\xdb\xa71\xf9\xd31\xea?\x94\x18\xae|\x07b\x93?\x1d\x03\xbc\x11Q%\xf0?\xaf\x03\x1b\x87\x1b`w\xbf\xaf.a\xfb\x88\xe4\xeb?\xc7y\xe23\xc05\x81\xbfd,\xb6\xe7\xdet\xef?\x05\x1e\x1a!/\x03\xad?\xc2\xfd\x8a&J\xf9\xe9?(\x86Bi\xe4\xa3\xb1?\xdf<\xdfu\r\x1b\xee?\x8e-\xf8FkS\x88?\x04l\x0f\xb3\x90\xdb\xeb??\xb0{\xc0sr\xc0?\x08dI\xe5\x18\x92\xeb?P\xde\x12\xdf\x0eU\xc1\xbf\x85\xe3\x0f\x96\xcb\x82\xf6?\xd2\r\xbd\xf1\xee\x03\x88\xbf\x11\xa8\xcc\x02\xb4\x8b\xf0?\x8f\\L\xf3?\xbe\x8c?\x82\xc6\xba\xbc?\x9a\xef?\x84\x81\t\xb4\x95\xd5\x8f\xbfL\xd1\xeb\x15\x9b\xf4\xf0?\xfa\x88\x7f\xb8\xc8\xfe\x9d?\xdf\xf84\xc6\xe1\xa5\xed?\x9a\x8b\xe5\x12-`\xb0\xbf,\xe9\x83\xe1\xc1\xbf\xf2?e\xd6"\xfd\xc1\x9d\xa1?po\x9c&\xbe\xb0\xe9?G\xc7o\x93\xa9\x0f\xa6\xbf\xb9N\x9a\xea\xbb2\xf1?\xb15\xbe\xd0\xf2|R\xbf\x99\x1a\xf4\xb9Z]\xef?\r\x9d\xbfOYr\x84\xbf\x99\xba\xe9\xe5T\xb1\xf0?\x19\xe4\x0cA\xc0+\xa3\xbf7e\x06\'~\xf4\xf0?\x90\x99\xe1P)y\xb2?S\x958P\xcd\xc5\xe5?\xfb=\xeah\x0f\x97\xc5\xbf\xf3\x1a\xe3\x94K\x02\xf6?\x16%\xb2\x83\x0c\xbf\xc1\xbf\x1f)A\xee\xd0\xb4\xf3?\n\xca\x00\xd9\x8a\x10\x94\xbf\xf7\xa0R}\x0c@\xf0?\xf4(\xe6\x88+h\x97\xbf\xe7\x9e\x8dG\xfe\xbe\xef?\xda\x1e\xdb\x97\xc5\x0b\x9e?x\x9aP\x95\xc8\x86\xec?\xc1X\xc4\xaa\xa3\xb1\x98\xbf.\\c$\xd2P\xf1?\xe8o9\x01\x16\xb6\xa0\xbf\xcf\xcf\x8c\xc9+\x86\xf0?g86\xe1\xe6\n\x91\xbf\xe4<\x14?!0\xf0?\r~\x1cu$\xb1y\xbfuXDQkB\xf0?\xf2\xd2\xfaI\x10\xbd\xa3?7\x1d\xf5`f\xbc\xec?\xbc\xe1\xeb.$\xdc\x91\xbf\x81\x05f$Z\x7f\xf0?_\x01\xa0\xce\x10\xa5\xb8?\x97dB0\xfcD\xec?\x97\xcc\xb0\xc8\xbc\xa1\xa3?{9V\xdc\xd59\xee?\xc4\xf3\xcf\x86`/\xa8\xbf\xc1b\xb9\x8f\x16\xbf\xf0?H\xca\t]P\xe8\x98\xbf\x02\x8cQ[\xe8\x88\xf0?O\x81Wl*\xbc\x9a?\x90\xf7\xb8>\xea?\xee?J\xf7\x11l\x19\xef\x95?dA\xbc\x84\x1b\xfd\xef?\x18[\x12\x15\x00\xbd\xad?;\xf5\xb3-\x8c\x95\xeb?"yc\xe2\x89\xb3\x8a?\xe0\x1f\xf8P\xb8N\xee?\x0b1\x83\xc4\x13T<\xbf\x08t]?\x08E\xef?\x1c\x11\xfdR\x06\xd5\xbc\xbf\xba,s\xd7\x82\xaf\xf4?_\xd2\xe6k\xb0\x88\xb3?-\x08A\xb3C\xd6\xee?<\xd0\x93*\xf6\xb1\xb1?\x9d\xfc\x01\x84\xb1\x02\xec?u\xf1Y\xa2\xa7\x86\xe4\xbf\xcd\xd2\xd1\xce\xa2\x8c\x07@\xccHD\xae\xda\xff\x81\xbf6Q\x05\r\xc4\x8e\xf0?&\xb1L\x0c\xd4\x99\x90\xbf\xe4*\xbb\xb0\x86L\xf0?\xff\xa6\x0b\xa2\xd1\xab\xad?Q\xd0mFm\xc6\xf0?\xa8/\xba\xa6\xd3\x01\xb0?"\xfc\n^\x9b\xb5\xed?\x95\x92\xe1\xf0[U\x95?*+/aQ\xa5\xee?I+\xe8\xd9W\x98\x90\xbf_<5\x851D\xef?\x8bJ\xb2\x98\x8a\n\xe8?\x04K\xd6s\xf0\xbe\xee?;\xcf\xd9<?\x13\x91\xbfn\xf8\'\x05\xd2\x94\xf1?"vc\x99U\xe2\x8b\xbfcc,\xa4|\'\xf0?\x1dx\x1d\x0b\x9b\xe9\x8b?\x1d1\x94a|\xde\xee?\x91\x98\x97x\xe8Z\xa2?\xa4O\xc6\'\xdc\xc9\xee?c\x9bT\xbf\xcc\xf2\xc1?\x91S\xe8L\x95%\xe9?P\xb2\xd6\xe5E\x95\xb3?[p\xdc#\x18>\xef?\xe1\xe5\xae\x18=|\x9d?C\x87\x88f\x87\x02\xec?k\xa4\xd4\x11|5\xa9\xbfgd,\xfa\x92\xed\xf2?\x07\xc8\xa9\xdf}\xe9`?\xb0\x1b\x84q\rP\xef?\xddh\x07e\xfa\xa4\xa6?\xe9w(\xcb\x80\x96\xe8?A\xd4]\xc0\x90\xf5\xbc?\tMV\xaf\xa7 \xef?\xb0\xe0\xd4\xdb\xe0\xd6t\xbf\xf0\\s\xe7L2\xf0?\x83\xe2\x8aG\xa2\x05f\xbf\x8f\n\xea\x90\xd0\x85\xef?\xcd\xea\x1d?\xd9E\xa1\xbf8q\xea\x10\xd6\x92\xef?\xdd\xda\xfd\x9e[W\x8f?u\x0b\xf23\xa7\r\xf0?\xe5\xa1\x8f\xce\x9b;\xb3\xbfU\xd9.#C\xd6\xf0?\x8c\xdd|%\xce\x1a\xa0\xbf\x91\x9b\xa6\x8d\x9b\xda\xf1?\xe1)\x92\xe9\xfdS\x9b?\xf0\xde\xdb\xc7\xea\x85\xee?g0\x86T\xbf-P?\x95+N\t\xc9\xe2\xee?W\x1fF\x8a\xe5\xd8\x96?\\f\xe8\x871+\xef?\x18\x99\x9b\xa7\xb2\x97J?\xef<\n#p(\xef?<{.XE\xbb\x7f?+-\\H\xe1M\xef?0L\x13\t\x11d\xb3\xbf\x9eA\x89\x88\tp\xf1?\xe1\xff\x95\xae\xfe\x8c\x9b\xbf\xe1)\xd8\xbd)\x07\xee?Z\x03\x86\xbf$a\xb7?3\xe5\x88\x8d\xf3\xb5\xec?\xc2`G[\xac\xec\xa4?GV\xa2\x07`u\xeb?\x9b\x88\xdc\x0c\x01\xbd\x97\xbf/\'9U?Z\xef?!m\x00y@I\x97\xbf\x15\n\xb2u\xc5\x0f\xf1?\xb2]\x01\x1a{E\x94\xbf\x88\xd8c\x12\x18"\xf1?\xe60M\xf5\xa8\x96\x8b\xbfa\xbcg\xf5\x9d&\xf0?\x07joCP\x9fe?\xee\x8d\x07\xc8\xcd\xc0\xef?\xf3h\x02r\xffi\x98?\xb3\x95\xd0\x964h\xef?\x9cY\x1c\x97\xb5%\xcf\xbf\x03e\xa2H .\xfb?\x9d\xcc\xe5\xfd\xee\x9c\xbe?Q\x17\xda\xb3\xb9\xc5\xe3?\xb4y\x0c\n\xe5\xda\x94?\xc0\x7f\x1f\x85\xd8\'\xed?_>\xf7\x07\\\xc9z\xbf\xbe\xa2\xf5m\xae\xfd\xf0?\xc9V<~O\xaf\xa2\xbf\xc2\xec\xa1V\xaa\xf6\xf0?\xbd\xde\rIo\xa7\x8f\xbf\x01\xa4F\x8d\xda\xe5\xf0?c"\xaf}k\xa6\xb4\xbf\x92\xdc\xe3\xf5\xc4\xf5\xef?h3j3\x87\xea\x8b\xbf\x9a6\x05),&\xef?\xd25\xb8\xcf\xcd,\xab?d~74\xe9\xb7\xe7?o\x92&\x17_\x11\x14@Q\x99\xb8\xb9\x94m\x17@\x1dh\xcf\x10J\xfdw?\xf49\xe4\xfc\x9f\xe6\xee?\xe8\xed\x8d\x94\x1f|\xb3?d\x9ekUj\xad\xee?K\xb3\\Bu?\x8a\xbfv\x88\x12.\xc7d\xf0?\x96\x89\x9aeq\xc0\x80\xbf\x01\x7f\x89\x914\x8b\xf0?\x05\xe4J}}\x06\x96?\xc8\x15\x1a\xc8\xa8\xb4\xee?\x8d\x1c\xcb\x105\x83{?\x17\x82\xf1\x18j\xcc\xef?\x07\xdf\xc7\xce\'\n\xe4\xbfb\xac\xccC\xe3\x8b\x03@c\xc2\xbaW\xc4\xb0o\xbf\xeb5hu<\x83\xf1?\xb0q>\xd5\x1f1\xad?\x96S\xf7\x86\x7f\xee\xee?v\xda\xc6\x1c\xf6h\xc5\xbf\xad\xd3\'\x18\x9e\xb8\xf1?\xc5\r{\xf4L\xf0\xae?\x91\xfb\xd9q]\xc9\xe8?K\x98\x07>\x0f)\xbc?\xc8B\x19\x85g\x00\xe3?Y\xcd\xc5\x08\xe5\xef\x80?\x0f\xcb\xd2`\x9a!\xed?\xfb\x83-n\x1b\xf1\x87\xbf\x97Z,/D\x93\xf0?\x99\\\x08\x00\xec_\x00\xc0\xe8"\xa3\xb8\xc1\xfe!@(\xa7\xde\xf2\xd3t\xbf?\x11\xd6\x1c\x9b\xe0I\xed?g\xfe\xe9!\xe4.\xa3?\xb0y/\xdf\x98\x81\xef?$m\xed\xb6\x9d\x1b\xa0\xbf\xfe{Yy(\xb3\xf2?ju\xab\x03\xfb\x7f\xa1\xbf\x8e\xc6h\xc6\xe7\xd6\xf0?\x15iv\x927.\xa1?&\xa2\xe6\xf7_\xbd\xed?\x14\xd3>x++U\xbfd8\x95\xf1y\xa1\xef?A\x9ej\x92\x9f\xa0\x82\xbf\xea{\x00,\xa1T\xf2?0%E\xb6hj\x93?\xe9]l\x0eY\xce\xe9?\xd2 {\xc2\x803\xb1\xbfK\x97\xc0\xfdA\x8e\xf1?\xe6\xed\x98\xd5Z\xfd\x83\xbff\xe8\x0b2\xa1I\xf0?\x01\x9fn\x82k\x0c\xb3\xbf\x9a\x03\x9a\xddY\xb7\xf1?x\xbe\xd8\xc9O\xaa\xa1\xbf\xbd9\xad\x17H\xe7\xf0?\xae\xb6l\x08\xea\xb1|\xbf\x18\x1a\x89\xe6\x0e\xa3\xee?\xd5e_,\x8f\xb2\x94?\x88\xf8\xcfxU\xb3\xee?\xca\x95y\xb1\x03\xa9\xa1?%\xacs\x1d6R\xf0?Yw"-\xdf_\xb2? \xe9$\x17\xe8\xe3\xec?\x05E\x98#\x98\x12\xb9?\xd0N\xe0\x0c\xd7f\xec?\x83\x9aH\tQk\xb5\xbf]Y\xef\xdc\xa1\xd5\xf4?\x0e\x8e\xa7w~\x87\xab\xbf\xe6$\xa4\xc0\xc3\x9b\xef?0\xbf^@\xbd\x9f\xa0?\xe0$\x99\x9d\xd1\xa9\xf0?l\xdc\x9e\xd3\x00\x07\x8c?\xc2*\xd1\x82C\r\xed?\xab\x9f\xd7\x10\x16\xc4\xb2\xbf\xe5@\x10\x1f\x92\x0f\xf4?\xdc4\x18\xadM*\xb3?\xae\xaa\x0f,<\x85\xea?\xc9s\xd3\xe8\xf9\xc2\xa4?]\xf7\x11l\xd0Y\xee?\x10\x15\xd6_O<\xb5\xbf\xc2\x90\x91\xef33\xf4?\x1al\xa9,\x80\x80\x85\xbf\xc1\xb4\x93\x0e-%\xf0?\xab\xd1\xa6W\xe2\x9a\xcd?\xc4[\xcb\xf4i\xbf\xee?m=\xe7\xa9z,\xa4?\x85\x1b)|>\x1e\xec?!5\x99\x80\xed#\xa2?\xe5\x1c\x8a\x1c_\xd9\xf2?\x9b\x96\xd1\xc2\x96\x19\x89?R\x1a\xd0.K|\xed?\xc1\xb9}\x8c\xbe\x9aw?\xf8\x0b\x8c\x9aP\xef\xef?C\xb0\'\xce\x12\x97\x80\xbf\xff\xbbi\xb0\xa9\xc6\xef?c\xbf\xf87\x92\xfd\x83?H\xf2\xa8E9\x0c\xf0?\xc0\x9fX+)\xfe\x93?\xf0\xbd\xa42\x11\x01\xef?\x99\xde\xc4\x93\x06\xc9\xb9?\xfc\x1d\x05\x0c\xbd\x10\xe2?\xd1K/}/s\xb4\xbf\x0c4\xa8\xfd\x1eZ\xf3?\x9f\x17\'\xd6\x97\xe1\x82?\xc6\xa2\xb0b[\xae\xef?Lt\xd35b\xfc\xb5\xbf&\x9eZ3\xa3$\xf1?m\x08\x90\xf3G\x15\x90\xbf7[&\x1a\xc0\xdf\xf0?\x0e\xaa_\xd3\xb3\xf8y?},O`c\xce\xf0?\xa1\x91\xb5\x00x\xce\xc6?\xf2l|\\\x06v\xd4?)G6\x01t4\x8f?\xf0\xa7\xc1\xdf2\x0e\xee?\x82o\x94\x191*\xa4?\xaa5\x1dtY7\xef?2b\xc7\x9f/\n\x9d?\x1c\xa0\xce\x16\x87_\xf0?K\xd6\xbecD\x8a\xf0?S\xb6\xc1%\x81S\xee?!F\xe1\xa8=\xff\xa5?\xa7oF\xd4\xad\xeb\xe9?\xedE\x7f\xd4\x86\x89\xa5\xbf\xcb\x0cFS&\xc9\xf0?\xf6\xb0WO\x16eh\xbf\xbd7\x1e\xd3b\xc0\xef?\x9d/\xf4\xfd\x1f%\x90\xbf6(D\xd2\xfa\x80\xf0?\xa0\x9b\xa7_(\xf3\x9f\xbf#>\x8eg\xec\xe1\xf0?%\xa7\xd9o\xc6\xce\x9b?\x8f<\x93\xb9\xd7\xf3\xef?\xcd\x1e\xb7\xfe\x0e\x91~\xbf\x1e\xba\t`\xe3\x05\xf1?\xf1NE\xd7\x0el\x86?;C#T\xadL\xef?\x14\xaf\x10\x03\x98\xdd\x9c?;foA8\x06\xf0?\xb7w\xb6w\x98\x9f\x96\xbf\x86wx\xc3\xbe\x0e\xf2?\xdd\x10\x14XS\x9dW?\xa24S\xa7\xe1\x8b\xed?{Ug\xb6\xdc}\xba\xbf\xb7W\x80\xa8=\xa7\xf2?+\x1e\x90\x85O\xea\x85?\xc2\xf6\xf6A0o\xef?\x80\x04\x99\xe1m\xe5\x96\xbf\x05\xb4y:s\x19\xf1?g\xec\x9bj\xbf\xd3\xa0?\x9a~BP u\xec?\xef\x91-\x89\x02r\x8b?Ql\xe9\xa6\xa7\xcf\xf0?\x96\xf8z\x19\xe0&\xc0\xbf\x06-\xd7\x9d\xaef\xfa?\xa4\xc9X\xd2\x9e\xeb\x88\xbf\xd2BT\x19\xd6\x07\xf0?\xc6`I\xe3\xe7\xd8\x9b\xbfw\xb9\xb1a\x08\xe0\xef?\x94\xa4R\xd6#\xac\x90?\xe5u~\xa5\xca\x99\xed?lI\xfbp4\x9b\xaf?\x07\xbdH\x12\x04\x02\xea?\xa6\x0e\xfcT\xd9\xf5\xc2?\x02\xa6\x87v~\xff\xe2?p\xdb\x1e\xb0\x98\xf0\xa0?\x06\xf2\xa84]\xd4\xea?2\xf4\x01\x05&\xac\xbb\xbf\\9\x8b\x8d-\x7f\xf0?De\xe6Z\x83\xbf\xa3?V\xb3\xfdzvt\xf0?\xb4\xeei\x94k\x9a\xb3?\x10I\x90\\C\xca\xe5?o\x95\xe6$\x02S\xa4?\xb5\xdb\x01W\xbc\xa9\xef?n\xdd\xb4?\\\xcf\x88?\x1a\xbb\x18e\xa12\xef?\x02\xf5\xb8}}W\xe3?N^\x7f\x12mV\xf0?e\xbd\xc0\xd9A8\x80?\r\xd3\xe7\xd7V3\xef?\x96\xc7\xabN\x11C\xd0?\xfav\xdcd\x13\xe6\xe7?N\xc5c\x89Ib\x7f\xbf\xb91c\xf7\xac\x93\xef?\x0e\xa6\x05\xbaK\xac\xed?\xc6$\x88\xc4\xee\xc2\xe4?\xf17L\x92\xa8$\xb8\xbf\xbc\xb6=\x99$H\xef?S\x90+\x8e\x97\x8f\xb6?!O\xe4\xe96j\xe3?\xcb\xab\x1d\xce5\xe0\x8f?N\xa9v65s\xee?\x07\t\x03\xe5\xf4\x82\x9b?\x1f\xf5\xda\x1d:\xa2\xee?\xed\xa6\xef\xff\xd9p\xbf\xbf(\xd8\x9e\x15v\x0f\xf2?\x16\x07\x01A"\x9e\xa1?\xe9n4\xd3\xf4\xb7\xec?c\x8b\x97 \xd8\xbb\xad\xbf<\x1elj\x85\xc0\xf0?)\xf4\x8d:\xf2A\x97?\xe1=\xcf^\x87F\xf0?\xcb\xd5\x91\x14_E\xb2\xbfy!\x1c\x85Yu\xf0?\x81\xe9>\x86(\xf5\x80\xbf\r\x8c\x03\x9d\xc9\x8e\xef?\x1d\x91r\xf4\xdc\xc7\x87?\xf0\xb8\x9c\xc4/\x88\xef?\xac\x8f\xa4V%\xdf\xc2?\x84x\x99\x04H\xcc\xee?\x83:7\'\x8d\xd2\xa1?C\xc9{W!c\xee?\x1a\xbbE\xd0\xec\xc9o?\xb9"\xb8\x8eF!\xf0?T\xa4\x8d\xd0\x1dx\xa0?>\xc3\xcc&{`\xef?\xb3&\xd7\x87\xd6>\x93?M\xd6\xb5\'\xb7M\xf0?'
p51
tp52
bag2
(g3
(I0
tp53
g5
tp54
Rp55
(I1
(I2
I421
tp56
g12
I01
S':8\xf7\xd1\x878\x8e\xbf\x94%)\xf8`U\xf0?\x0b[7\x14\x9bg\xa2\xbf\xdf\xd0\xb5\x01\x8a\t\xf9?\x88(o\x91\xa3\x14\x92\xbf\xb7\xb2\xf7\xe1\x89\xc3\xf0?\xe3\xcd\xfcV\xccO\x94\xbf\xd8\tl\xfde\x0b\xf0?%wjk\xf0\x1c\xae?\xa87a1\x86\x00\xe8?&\xe44hmU\x9b\xbf\xa0\xc5\x9c\xbe\x8b\xaf\xf0?\xb0\xd5w\x87)Lq?\x19\xc4=\x19\x9a\xee\xee?\xd7w\xf1`\xdd\xed\xa6?\x88\xcc\x82\xe2\xfe\xb7\xec?\xe7\xc7\x86\x05,p\x06@\x8e\xaa\xf3-\x1a\n\xfd\xbf\x06\xb3S^]|\xb0\xbf\x0f\xa5\x95\xac\xe1\xa0\xf2?\x0f\x8e\xa7Z\xb47\x97\xbf\x81\x8c\x88? \x9f\xf0?t\xfe\xf4\xf0\xe7f[\xbf<\x9b\xb84kO\xf0?\x84\xd4\xf0u\xa8^\xa4\xbf\xeb\xe1 \x14\x0e\xcc\xee?\x7f\ri\x01\xbe\xf0|?\x81\x17\xda\x90\xd7<\xef?6\xb1!==+\x9c\xbf\xc8\xe1\xcd\x9d_\x85\xf6?\xd5>9\xbe\xd8\xd5r?\xe7\x13\xdc\x99\x1f\xe3\xf0?b\xf2T,?;\x94?\xb7\xe5\xc1\xca\xa4\xa1\xef?\xa7\xb4\xbbI\xcfa~?\x8c\x9c%\x9e\x9d\x04\xf2?7\xcaz\xc9bF\xbe?\xba\xdf,\xed\xa5>\xee?\x1cA\xb9n\x16\xcc\xa1\xbf\xad\x91\xfe\x0e~\x9c\xf0?\xc7mN~f\xf3\xac\xbfX\xbb\xaccv\x9c\xf3?\xa0(\x97\xa9\xf0\x00\x8c?\xcc\xe4(\xf7\xe7j\xed?]4\xa3RA\xf4\x7f?+\xd2\xc1\x12B>\xef?\\o\xfeqe*\x92?\xe7\x06\x8d\xf9\xb3+\xef?\xf3?\xc4\xe9sC\x81\xbf>\xa8\x04\xa74\xf9\xef?j\xe5\x96\x8e\xd0\xa6\xa1?\xdc\t\xaf\xf5x\xb3\xed?\xc1Sx#z\xffG?N\xd6(z\xb2\r\xf0?\xf0\xfb\x9f\xf3\x8bM\x83?\xf0t\x95\xc2\xa0.\xef?\xce\xd39u\xfc\xf0\x90?\x9e\xc2\xd4~\xcf\xcf\xec?p\x9d\x8dFO\x04\x8b?\xeaj\xa8u\xd4\x82\xf0?P\xa2\xa4b#\xe0v?\x12\xaa\x82\xb5\xcd\x04\xf0?\xf7>\xb8\xd6\x06\xd5\x84?\xa8\x1a\xb4C\xbd\x1e\xef?\x94\xb2\x0bx\'\xe0\xb0?\xe2\x92\xa4\xfc\x85\x9e\xec?\xd8~\xe6\xc7?\x1a\xa0?\x15\xdf6\xac\xf9O\xec?kd*\xa2q\xc4\xac?\x8a\xda\xfb\xee\xf8\xed\xea?\xd6\xbb\x16\xa6\xd1\xffw?S\xb2\xd5\xfa\xfdM\xee?"\xa83!\xea\x97z?\xdb\x03|\xae8\x19\xee?S\xda(t\x85\x89D?\xcc\x85\xee\x1f\xf4\x88\xef?\xd1\xbb\x00\x88\xea\t\x95?\xb9\xbe\x8c\xbd\xf1S\xee?\xcb\xc8mW\x15x\x98\xbfa\xc8&b\xd1\x85\xf0?D\x1c\xd7\xe4\x1er~\xbf\xc8\xec\xe4\xb4\xa5\xc0\xf0?\x11\xef\xb5\x1el\x06P\xbf\x81\xe7\xdfK\x1d~\xef?\x8fs\x01\xe2\xc3\xde\xa2?\xda\xb6U\xfeqF\xef?\xd1\xf2\xa2\x85\xde5\xa2?\xf4\x86\x8fj/\x89\xf0?\x9c\x1c\x95\xa2\xdfH\x87?F\xbbcy\xbd=\xee?Y\xcb\xc7\xcd\xf3:u\xbf\x9e\xb5\xd3\xc8\r\x05\xf1?I\xc5\xfa\x9d?\xbf\x89?\xa3!\xe9Ya\x05\xf0?\x07\xccCV+\xa6\x91?\xd8\x86\x98\xd3z\x15\xee?5\xa3\xd5\x126C\x84\xbf\x19\xc8d\xb3\x0b\x1f\xf0?s\x0c\x8c,\x0fv\xb9\xbfyy\xe3Ykv\xec?6\xa6\x8c\xc5\x8c\xbd\xb7?\xf8iIT_z\xe7?;\x86\x93\x92B\xfb\xd3?\x0e\xc6\xd6\x7f\xee\x0b\xe5?E\xa7"\x1e\xf1\xce\xa5?~\xb4\xcb\x1e\xef\xa9\xee?J\xb8\xc9R\xf7?\xc1?\xd9\xc2\x0b\xeb\xc0X\xee?\x86\xfd\xe0i]%~\xbfy\xe5\x8f\x9c@\x1c\xf2?!LK\rg\xa6\x8e\xbf\xd5\xbb`\xe6l,\xf0?5\xb0\xd2)+&\xb8?\x17s\xd2\x8c\xaa\xcb\xea?\xd0\x1b\x91q\x17\x03\x98?\x00\x89G\x03\x91\xa7\xf0?\xfe\xfe\x8aB^\xe9\xb0?W\x13\x93\x9bv\xc4\xe8?{\x98.\xbb\x8cIk?\x0e\x92\x9b(\xe6O\xee?\xc0\x1f\xca\x9dL[\xb1\xbf\xba\x05\xc0f\x7f\xbf\xf1?\xc6-\xae\xa2\xf6\xc7\x82?r\xa4\x97\x9f\x8a\xd7\xef?\xbf\x9c\x1b\xc9\x0f\x9e.?\x8ac/\xfa\xdf\x82\xf0?V\xd0\xae\xb5\xa0\xbe\xa1?\x0e\xf6\xd6\x9a\x07\\\xf0?[\xca\x96\xb8\x99bT\xbf\x14\x01\xaa\xf3\\\xa6\xf0?\xb1\xd2\x7fd\xcc\xc5\xa8?\x85N@oz\xa0\xe7?\xb9\x86\xf0\xb5R[\xb1?\xfa6\xe7a4\x85\xeb?\xb3\xeazl]f\xc0?djYB9\xb0\xea?}\x90\xba\xe37Bk?\x17\'\xe1n\xadw\xef?\x84\xb3\xf3_d\xce\x89?f\x85\x8b\xefL\xa0\xec?\xeboa\xa2?\xc4\xa1\xbfe\xf5!\x13Ab\xf0?\xa4\xc8J\xb7{\xc4\x80\xbfA\xc6T\x98\xf3\x06\xf1?5>}\xf7\x02}\xa3?\x8bvl\xd3\xb0\xf6\xeb?\x95\x16\xa0\xa51\x97\x85\xbfVj\xd2\x84\xc9p\xf0?r\x14\x02X\xac\xd7\xb5?\xef\xa8\x89S4\xae\xea?\xb5\xee\xd7Za\xc1\xc3\xbf\x05\xd8sY\xcax\xfa?nH\xf3\xd5y\x9c\x94\xbf\xc4\xc6?\x01\xbc\x84\xf1?\xa5-c\x9f\x13\x9b\x9f\xbfF\x06\'\x02\x8a\x0c\xf0?\xc9\x90\xed\xed\x9d\r\x8f\xbf\xaa\xd1\xc3\x07{\x8a\xf0?\xbe\xb5)\xeb}i\xa4?\xa2\xdd\x97\xc5\xc4\xc9\xee?J\x1a\xdc\x16Pw\x9f?\x83n\xa9\xf0\xe1N\xed?\xf3\xc9\x16\xdfm\xb7\x9d\xbf\xd8l\xe4\x15\xf8\t\xf1?\x1d_\xdd#\x84\xf1\xa9\xbf\x15\x8d,\xbe\x82@\xf2?\xb8s\x8a\xd0\xe2,\xbd?\x0fH\x862\xf4\r\xec?\xf8\x01,l\xbcf\x92\xbf_\xbb\xca\x08\xdc\x9d\xf0?cdE\x0f\xafB|\xbf\xe4\xac\x9de\xb0\xcd\xef?\xcd\xd7u\xc5d\x87\xa2\xbf\xe7\x9c\x81?\x865\xf0?(\xc5Q\xf7\xcc\xdea\xbf\xfd\xf61\x86G\x02\xf0?\xfe1\xc4m\x01\xfa\xaa?\x81\xfa\xdd\x9a\xde\xe8\xed?dR\xe6i\x98\xcb\x9a?OQ\x8esb\'\xef?+\x15\xb0\x86?\x98\xc7\xbf\x997\x1f\xd6\xf2\xde\xf4?m(\x14\xbd\x85\xb1\xa4?\xf1\xdaS\x1d\xade\xec?\xccX\xe5\xd1\xa0[\xc1\xbf\xfe\xcem\xe3\xa26\xf5?\x13\x00r\x17W\xac\x9c\xbfG7%\x80:\xc8\xf3?\x7f\xae\x17vg\xdf\xbc\xbfcc4\xf9\x1fx\xf4?\xcb\xee\xd1\x808\xac]\xbf\xee\xb48\x05]\x99\xf0?i\xcb\xd6Zu\xba\x80?.\x94\xd5\xc3\n4\xef?<\xe7N\xe2\xeb\x9e\x9c\xbf\xbe\x0f\xa0\x8a\xc2\xfd\xf2?\xbcFk\xbe\x8e%\x81\xbf\x1a\xd8\xdeo\xa5\x13\xf0?#\x89\xa5X\x1cY\xbe\xbf\x13(C\xacEW\xf5?\x9dRZp\rq|\xbf\xb6\xfa{\x9c@\xf2\xef?\xa8\xc2Wn\xcfs\x9f\xbf\x1d\x91\xe1\xb5\xf8 \xef?\x07\x86\xfe\xc8c\r\xf0?C2h\xd3\xcb\xcc\xa2?Hx\x08o|\x12\xa5\xbfZf\xb7\xbeH\x1d\xed?\xf1RSCF\xc3\xa5?\xad\x87\x94C,\x18\xf0?[t7cp\xa7\x8a\xbf\x8b\xc2\xd4>a\xcd\xed?\x83U\x91\x93\xcb\x1b\x92?\x00\x7f\xbaS\x80\x0e\xef?\xf0H\t\xc7\xd3\x9d\x9a?(\x0c\x066\x15E\xf1?\xe7\x1c*\xd59\xfe\x84?\t\xd5|\xf1\x7fV\xf1?\xcbS\x06\xee\xf1\xfa\xc4?d;g\x1b\x1a\xdf\xed?\xf2N[\x18\xe3\x12\x9b\xbf])\xf4\xf7Y\xa2\xf0?_\xb6g\x03\xe9I\xaf\xbf\xa7>K\xbcm\xa6\xf2?\xce3\xab\x93\xdd_\x90\xbf\xfa\x948rT\n\xee?\x90\x84?&!M\x93?\xb1\x13Y\xe0\n\x11\xee?W\xa5\x04n\x90\x94\x87\xbf\xcf\xd3+\x07=\xb1\xf0?\xd3\x8f4\x95\x85\xcd\xa0\xbfR\xa3\xfb\xf9$s\xf0?\x06\x9e\x13\xa1\xdc\xff\xa5?kN\x07\x1c\xbb\xe6\xe7?m\xd37\xf4\x81\xfe\x98?%9Z%\xc4\xa7\xed?g\x89\x03@\xb3 \x90?_L\x9e\xe7\x13\xe3\xec?\xce\x87\xcb:\xf10\xb3\xbfW\xcf\xf8\x99P\x93\xf4?\xfacg\xd7K\x1b\xae\xbf\xfcz\xe1W0Z\xf1?\x0b\x17\x906f\x9d\xac?\xddh:&\xc2\x8e\xef?\xb8\xb2\x01\x80\xe2k\xb7\xbf\xa7q0\x1b\\\x9e\xf1?|\xbd\x0f\xb4J\xcd\x8b?\xab5\xd7i \x00\xf0?>VG\xf4\xf0[\xa3?\xd3\x9aWl\xf1\x13\xed?\x08\xb7-0)\x0fx\xbfJ\xc47\xbeX3\xf1?\xd3\xdc@8\xc1A\x87?\xa8#\x1a\x01\xedE\xed?\xab\xc1J\xb0\xd77\xa7\xbf\x05\x83\xe9\x00p\xd6\xf4?\xae\xb487\xde}\xc5?|j\x92d}\xd4\xec?N\xe6\xa5\xc1E\xe6\x9c?6 \xcf\x08\x1eS\xf0?\x9f\xa5\xde\xaaMu\xac?\x19=\xc5\x1b\x1e#\xea?\x05>\x90H\xb8\xf7\xa8\xbfR"\x9d<"]\xf0?\xdf\x97\x0c\x13\x0c\x0f\x8d?\xcf\x92\xb4\xd4\xee\xff\xed?h\xb4t\xf0\xddb\x8b?F\xf3\\$\xde\xf1\xef?\x01N$\xe8\xa6\x13\xac\xbf\x06\xf1\xba\xee6\x93\xf0?\xe5\xba\xe2\xc9\x01\xd8#@#\xba\xef\x1bx\xe4\x1f\xc0K\x7f\x13+J^>?\'\xed\xf9\xa7d4\xf0?\xb5g1V\xfd\xa2\x9d?\xdc\xf0\x9e\xf7\xe9\xd0\xee?4\xb4\x170\xd6\xdc\x83\xbf\x9322\x01\xbc\xa2\xf0?\xb4z\xf53\xdfd\xa2??\xdd\xba\xa9\xc2\x92\xed?\xd0\xab,\n\xea\x16\xac\xbfm\x96\n`\xf0K\xf0?[\xa0S\xc6\x8c\xda\xb1\xbf\xc0\x12/\xa2m\xee\xf2?\x9dIp\xf1\xcfj\x8d\xbf\x8eR=c\x90\xc9\xf0?+\xa3\x94\x84:\xc4J\xbf\xcf(\x18\xf8\xc7\xa5\xef?\xba:Ic4\x9d\x9b?\x0fO`\xca\xe1\x07\xed?vn7vJ\x8d\xb1?\xc7\xa5\xe3\xcfFS\xeb?\xbf\xe3\xaa\x98\xc1\xfaV\xbf\xed\x83\x1e\xe4\x1e!\xf0?A\xf8\xd6\xb5+\xd6u?2O(\x9e\x04\xe7\xef?\x8b\xa2\xd6\xe96a\xac?(\xdc\x87p\xe1M\xee?\xa2"Ny\x01\x1f\x8e\xbf\xf9y\x98\xb5v\xe6\xf0?\xc8\x0b\xed\x1bX\xfct\xbfGX\xcfN\r=\xf0?\x14h\x1f\xc3m\x88\x84?Edl\x1a]\xc7\xed? \xb0\x82\xcd\xbe\xbb\x95?\xe3\xa2*\xf9\x11\xfc\xee?\x80\xab\xbf\xbb\xec\xe2\x9f?b-d\xd0f>\xef?\xc3\x95i\xfd1S\xb0\xbf<\xc3\x88\xc1.<\xf1?]\xb2\xcal\x9cj\xc7\xbf\xf3\x1b\xd7%1C\xf4?\xddI"\xd7\x1d=m?\xe67O\xfd\xa1\xdc\xef?\xbe\xa7\xb0\xa5\xf4_\x97?\x18\xe1\xcf@\xf4\x99\xef?A\xb5\xbbT\xdf\xd1\x99\xbf\xda\x8d\xcc\xedD\xad\xee?R\x8a\xcd\xd8\xae\xff\x9a\xbf\xa9\xc6\xa9\x83\xc4\x1e\xf1?0ep}\xdeX\xaf\xbf\x1c\xc9N9l5\xf1?\xfe\x03\xb9\x1e\xba\xd5\xc0?\xb9t\xcc-\x19\xa6\xe6?\xb3k\x1b\x8d"\xaa\xb6\xbf!\xdbp\x88Y\xb6\xf1?\x83\xbc\xd3t\xc0G\xa9?\' \x05\x0c\xcb\x01\xea?C6R5\nX\x18\xbf\x05D\x88\x88-%\xf0?\xc0\x8bx\x95\xc4\xef\xb6?\x8f\xd3$\x9ct,\xec?HCr\xfdu\xa3\x85?\xc67\x04\xa3\x83|\xf0?|o\xb0M\xaf\xd9\xa6\xbf\xd0\xf1_\x1b\xcc\xe7\xee?3\x04#\x16\xb1\x9bl\xbf\x82gw\x97w\x8c\xef?X\x1c\xc0>\xe1\xfaB\xbf\xb7\xca\xd6\xfd1\x14\xf0?\x19\x965\xa2>4\xb0\xbf\x15A\xfbo\x05\x1e\xf2?\x02w\xc2F\x1cu\x98\xbf$\xc0\xade\xfe<\xef?8\xe5\xe4\xdf\x98\xd3E?\x06\xc8\xeas\xc3\xe5\xee?\xf4\reD\x860p?\xbe\x84\'e\x07>\xf0?\xa1\xac\xee\xb1p\x7f\xa5?\xc0v\x96\xa7\x95\x9e\xef?\x9d\x195\xa2\xe5r\x92\xbfo-?-\xddS\xf0?\xee\xefK\x0e\x03\xe2\xa9\xbf\xbbxC\xcd\xdd\xbd\xf3?\xab\xbc\xe7LaV\xa7\xbf1\xfev\xff\xe3)\xf0?\x8f?\xf1VT\x8d\x97\xbf\xfa\xc4p\xeb\xb0\xa0\xef?fB\x0c\xe0\x92\x81\x90\xbfO\xd5\x9d\xca\xa85\xf0?\xd4%\x8e\x00\xc8\xa2\xbb\xbf\xb0\xf2\xc83PA\xf3?\xfd\xf0\xdb31\x1e\x8a\xbf\xe3\x07\x8ez\xfb}\xf0?\r\x9d47J\x15\x7f?\xa3\xd2-\x8e\x10\xc6\xee?\x00FB\x8b8\xfbh\xbfr\xd0\x15~j=\xef?\xf4\xdb8\x06\x90\xf8\x9e?<\x14J\x9c\xbbK\xef?\xa7\x8f\x1f\x18\x13\xb3\x88\xbf\xe8y\xcbI.\x89\xf0?\xab\xce\xf9\x08;\xf3\xa0\xbfpa\xae\xd1\xbc\x1b\xfc?\xdc\x0e\xec\xf8K#\xbb\xbf\xb2\xcbG(l\x18\xf4?,\x0f\xae\x94\xe9\x04\x9e?:\xd0\xb7k4\xaf\xef?m<\xa9\xdb^@\xa2\xbfX-H\x06Lb\xf0?iB}%\xba\xc5\xc1?(lk\xed3\x14\xee?\xbe\x19\x12\xb2\xe5*\xa9?\xd2\xa9\xa3\xed\x8ay\xec?\xe7\xdehV\xe4\x9e\xb7\xbfn\xf34\xac\xb6\xf7\xf0?\xf6\xc9[\xf8\xa3\x9e\xab?\xf9\x97J\x13\x14\x1e\xea?F\xa3\xa8\x04\xd2G\x90\xbf\x10\xdc\xcb04\xea\xf2?\xd0\xe4B\xb4!\xc0\xae?\xfb\xcb[\xb4\xc3q\xf0?)\x99\x06\x17u\xe1\x86\xbf\x8b\x00!\xda\x11:\xef?S\xa6\xde\x0e\xd79\xa7\xbfv\x04\xe8\xb3\x9e\xd7\xef?$\xab,\x01\xb7\xdf\x94?6|S\xbb\x01h\xed?\xfa^\xdao\x96\xca\x82\xbf\xbb\xa4"\xa6I\\\xf0?\xc6\x81\xfcF.\x08\x8e\xbf\xdb2`\x08Y\xd9\xf0?:v\xadu\xd6L\x94\xbf\xbcvG\x1f\x90\x83\xf0?\x13\xde\xd2a\xb4d~\xbf\xc7\x87\x96\xe7\xc4&\xef?d\xf3\xf9\x1d\xfc\xcf\x96?\x7fBx\xb2\xc1\\\xef?\xfd\xd8Z\xeb\x85\x94\xa0?J\xa0z+\x0c\xd4\xf0?hX\x1a)\x99\xfeg?$\x8a\x06\x9b\xfd\x1a\xf0?G\xcf\x81G\xbd\x0f\x99\xbf)\x8d\xe0B\xf5L\xf0?\x00l\xc6\xb4Ie\xdf?\x945\xd2\xa4\xca\xdb\xe1?\x8a\xc0\xf8\xba\xc6\x95\xac\xbf@%\xd8\x96O\xd6\xf0?\xab\x02\xf9\xf9R\x00\xa8\xbf\x17\xfa\xa7\x18\xadR\xf0?\x80JduQRv?(\xd5\xf9hB~\xee?\xbe\xb9fs\xea\x0e\x8e\xbf\xb1\x04ntRk\xef?\x8aI\x95\x93\x9e:y\xbf$k~bi\xe0\xf0?F\\\xdf\xc8\xc4\x05\xb1?\xba\x85\x9c:\xc1K\xec?\xb2z\xeag\x96\xb6\xa2\xbf\x05\x01\xbcLJ\x88\xf1?r\xad\x00\x19\x8eA\x98\xbf8\xc2\xbd\xef\xf70\xf1?P<\xa1\xc0d\x88\xa7\xbfr\x02+\xe7\xd6A\xf3?\xa4w \xe2:*\xa5?:a\x99\x85\x99V\xed?\xa7\xdb\xf6r\xc0\xc0\xcd\xbf\x0c\xcc\x8f-\xde\xb4\xfb?\xef\x81\xa7\xf7\x9a\x19\x95?6\xde\x95\xc3\xba\xd6\xee?{&\xbdP\xf7\xfd\x8f\xbf\x95\xbd\xb7K\x81\x8a\xef?\x01\xb0\x04\xd1H~g\xbf\x19`D\xeb\xc6\xea\xee?\xc9\xc4=\x98\xfb\xa8\xb8\xbf\xf0\xb9\xeb\xfetN\xf2?A\xf9K~\x1d\x9a\xab?Ws\x1a\xee5\x9b\xec?%rm\x9e(\xa9\xa4?\x15r{\t \xd5\xeb?\xf1\xf5e\xce\x0f|\xaf?\xc2\x92\x185\x0e\x83\xed?\xf8\xab\x00#0\'\xb7\xbf.\x1f\xdd\x1b\x87\x80\xf5?>X\x89\x8b\xf2\x8eX?\x06\xdcgI\x0c\x9b\xf2?y\xd4\xd5\x9d+v\x96?94\x8ed\xff\x98\xf3?z\x10\xe7\xe5\x03\x86\x7f?\x93}\xd2\xf0\xa2\x12\xed?\xc8\x16:\x18js|?2j\x18\xbd*d\xef?\x1f\t! \xb2\x84\xa6?\xcd\xb5\xd4\xd9\x0f\xe3\xed?\x87\x86zs\xd0X\x84\xbfA\xe2\xe8F\'Y\xf0?n\xaf\x860\xc4\xf7|?\x1b\xf0\x8c\xca/\x0f\xef?\xc1\xf5o4\xa3+\xa8?q\xe0\x80\xdao\x93\xf0?HO\x9dqQ\xce\xa0\xbfw\xa7\t\x0c\xdcW\xef?\xceO\xff\xba\x8a\xb8\xce?\xe0m\x04\xc7\x13u\xe5?%\xe8\xcb\xe7q\xcf\xa4\xbfo\xf7U\x18\t\xfe\xf0?\x95\x9a\xa8\xcczd\xa5\xbf\x8b\x84c`"h\xf0?\xf5hI\x15E\x82P\xbfw\x08.\xeb(H\xf0?T\xc6*\xe1\xa2\xbao\xbf.\xd7a\x07\xc7<\xee?\xfd|\xb3\x11\x85\xb2\xa7?\x02\xdb"\xa0\x14\x83\xe8?\xae)6i\x8e\xbf\xa0\xbf\xca\x8acs\x84S\xef?>\x119\xbd]\x03\x9d\xbf\xd8t07\x94\x12\xf0?}\x17\xeb\xff\\RZ?\x8b\xb2\xb0\xe8\xa2R\xf1?\xac\x81d\xdep=\x89\xbf`0\x05\xc3Zi\xf0?U\xb2z`\xdf\x0b\x9f\xbf\xd3\xcc]z\xef\x16\xf0?\x0c\x1b\xe0\xa0bz\x82\xbf\x8dO\xa2\xcfo\xf9\xf0?7?N\x95eC\xc1?3\x8d\\\xea\xab\x10\xee?\xcb$\xd5\xbe6\xfa\xb3\xbfy2\xb7\xcc\xe5\xd6\xf2?\x06>\xa0\x1d\x1d\x17\xae\xbf\xf3A]\xd5ZZ\xf1?\xcf\x14\x94\x8f\x88t\x92?R\xd9\x1f\xc4<K\xed?\x0c(4\xd8\x89m\x97?\x89\x85[v\xb8|\xed?\xe8\xe66\x19\xac\x14\x84?\xddq\x86w\x9f*\xef?\x16\xdbEn\x85\x14\xb5\xbf\x08\xf42\x1e\x9b\xb4\xf2?\x88\x02,\xa8\x9an\xb2?\x19\x83?\xf9\x85?\xe7?\xfd\xc1\xa2\xd1\x96\xf4\x8e?\xd4b_\x12\xd1\xa5\xee?G\xa8n\x8b\x08z\xa1\xbf\x04\x0eQ\xee\xc2J\xf0?V`\x1a\x9a\xd6U\x9c?g\x92\xea\x1f\x91+\xef?XP%\xd1\x89;\xba\xbf\xc4x\x80\x94\xf0r\xf1?\x9b\xa3u\x10\xcbN\x8c\xbfa\xe0\xe5\x9a\xcf4\xf0?zu\xf4\x96\xda@\xc6\xbf\xe2S~2h~\xf9?\x8a\xa3\xb8\xf5\x88\xba\xa4\xbf\xe2\xd0\xd2\xa5\xfe\x1c\xf1?\x02\xd2\x01\xc8\xc5@\xaf\xbf\x18\x1d_0\xd7\x05\xf3?\xa3\xb8p`(\xdd\xa4?\xb4\x12\xb1\xf4\x9f\xe7\xed?\xb0(\xedK\x1e3\x97\xbf]\xe9\x99B6\xeb\xf1?y_d\xe8M?\x99\xbf\xf2\xb5-\x1c{\x10\xf1?8\x04\xd8@\xba\x83\xc8\xbf\xcffr6\x89\xbd\xf7?;\x92\xa8 2\xf6\xba?\n\x08"\x1e\xc1\xce\xf1?\xc6mNfab\xa6?\x0cdd\xcb\xae5\xe9?\xa4;\x99\xfd\x13X\xb6?\x84c\x16\xe4;\x1a\xe9?\xaf\xf0e\xea\x93\xd8\x80?\xbb;\xden?\x93\xed?\xdf\xf8\x0f=\xe9\x90\xb8?\x1e\x98\x9fP\xa7\x16\xea?\xe2\x10\xbb\xac\x03\xfa\x8d\xbf\x1di)\xab\xa1\xb1\xef?\xeeT\xd4_\xd7\xd1\x92\xbf \x95\xb0U<:\xf1?a\xff\xbf\xf6\xffE\xa0\xbf\xae`\xa0\x04\xe89\xf0?\x08\xfc\xab\xac8\x88\x9e?\x1dtdq\xc1w\xee?\xa7\x82\xa4\xc1\xa8\xd0r?L\x99\xe1\xe8\xf02\xf0?\x1f(\xdfl\x9e\x82\xb9\xbfk.|\xf5\xfb\xa4\xf2?j\xd9\x06z\xdd\xe6\xa5?]\xec\x00\xef\xe8k\xea?\x1e\x04\x10G\xc3\xa8\x81\xbfJVs\xb4\xf5\xa9\xf0?\xa0(\x08\x0cg\x12\xb8\xbf8\xb7\x13\xe3\xa42\xf6?\xa6\x8bN9\x8f\x9c\xb0?\x11<hH\x17X\xeb?\xa0<\x04\x87\xb1\xd8\x83?\xf5\x9f\x7f\x89b$\xf0?p3\xc8\x95v\x19\x87\xbf\x1d}#W|\xed\xee?\xa3\xdb\xfe5,\xd4\x88?\xd8T\x1c\xfe\xe4-\xf1?\xa2_@\x82\x87%u?1\x82I\xe2L\xe1\xef?\xfe\x98:W\xd4\x99\xb3\xbf\xdc\x83\r\xbf\xdeG\xf5?\xa4O\x01\x98\x9e\xd0\xba? ud\xb7 c\xeb?<V\x1a\xad\x8d\xe0\xb5\xbf\xd5\x96\xbb\xe0\xce\x88\xf2?\xb8\x82t"\xe9c\xb5\xbf$W\xc1\x91b\x93\xf1?\xb5X\xfc\x11\xf5~\xa8\xbf\x9aES\xdf{\xb1\xf0?\xf6\xa0Z\x1d\x9b\x12h\xbf\x88o\x0f\xbbC\xa7\xef?\xc3\xca\xafm\xcd@\xba?`K\xe5\xd1\x82\x0b\xec?\xe1\xbe\x8fA\x9a\xbf\xb8\xbfB>\xc2]N\x05\xfc?\xb5\x9d=\xfb8%\x9f?\xe0\x99\xcb%,\xc3\xec?=I>h3\xaf\xac\xbf\x97 Q\xcbP,\xf0?@\xac\xb3\xc6\xfe"\xbb?\xf0>g\xf2mG\xe9?H\xce\xc2\xf9\x14(\x94?\x14\xd8\x0e}\x83\x08\xec?\xea{\xcby\x11\xea\x90\xbfu\xf1C>\xf3/\xf0?\x97\x8eL95.\x8c?\xf2\xce\xfbB\x97\xa8\xef?\xb9\xbf\x99\x03\xe6\xc0\xa5\xbf\x1a\xa3W>\xfb\x19\xf2?\xf7\xec\x07T\xbe\xbbg?\xf4\xcc\xd4bSt\xef?X.[zM@\xb9?\xce0.\x11\x13\x97\xe9?Y\xd4W\x9b\xea\xbbO?\xb1\x88\x07\x99\x88\xf3\xef?A\xf6\xcd\xde\x88\\\xb6?\xcd\xaa\xfb\x80\xb5H\xee?hc\xd2\x9d\xe6\xf4\x82\xbf]\x1c\xd9\xfa\x9c\xee\xf2?X\n\x95#\xc6\xcb\x9d\xbf\xe6\x00uB\xeb&\xf0?"\xb4\xef\xd2\xc9-\x97?\x87\x89\x95\xd3\x92\xfe\xef?{F\x99u\xbaY\x94?\xef\xe4\xce\xa4\x83\xd3\xed?\xd1\x86\x10=b\x07\x8d?\x835M0\xb1a\xee?a\x96\x83[\xebj\xc0\xbf\xc6\x9d\xe5o\xc2\xe3\xf4?m\xc5\xb0\xc2\x1a\xb5K?\x92\xfe\x95E\xb4\xb5\xf0?L\x05z\x90K\xda\x94?\xfc\xf3\xdb\xd7g\xdc\xee?\xe2\x13\xf1\t\xa6\x8e\xaf?\xa3\x87+`|\x90\xec?\x1c\xc7gB\x0f\xf1\xac?!\x8a\xeb\rH\xb2\xea?\xb2)\xf5j\xd5Z\xb9\xbf\x17\x9f\xbd\x14\x8b\x14\xf3?\xb9\x08\xcc\xbdM\x12\xcd\xbf\x18\x97\xedm\xf5\x96\xf3?\x05\x0c\x13\x98\x89Q\xa2\xbfaS\x1f\x0b\xf1\xe8\xed?\x9b\xf0\xbb\x0b\xcaS\xb9\xbfvah\xe6\x9e\xcb\xf0?Q{\xf6\x7f\xdc\xaa\x8d\xbf\xa6\x8du\x9f\xe2Z\xf0?\xa3\xbe\xec\x96Fi\xa0\xbf*\xdb\xcbf7\xee\xf0?\xdd\xd4\xf6\x82\x02\x82\x89?o\xcb\xa2\xd2\xeb\x0c\xee?\x80\xd5\xb7\x97g/\x90?\xfe\xe4\x94oq\xb1\xf0?\x90\x01\x1c\xd7\xa2^\xb0?_g\xc8@\x95\x15\xea?x\xaa#\x97G\xca\xad?\xbf\xbb\xce/\x05\xb9\xed?\x0f\x81\x1a\xf9J\xfe\x86?\x07\xf6tL\xd1r\xed?0\xdb\x06\xf9O"\xc5?\x1e\xefof<\x9e\xe9?YH\xe3&\xc1(f\xbf\x03\x00\x98\xab\x9d\x04\xee?N(_\x1de\x83W?\x17o\xf9\xfb\xf8W\xf0?#jdh\x89=\xbd\xbfQ\xe3\xd0\xff\xab\x0b\xf5?\xae\x8a3vQ\xc8\xa8?\xac\x88y>\xe7J\xee?\xdd2X\xdd:\xa2\x9e\xbf\x9b\xc0\x03;\xb7"\xf1?6Z{\xf8\xb7\xf9\x80\xbf\xd4Z>\x1b^\xc7\xef?\xf5&\xae\x8cnf\xa4\xbf\x0c\x1a\x8eB\x83\r\xf1?\xa0\xcb\xd4\x99\xb7\x8e\x10?\x83\xf0>p\x906\xef?\x104\x01\xf4\x01\xb7\xb2?\xfb\xf4Pxto\xe9?#\xa4!\xc1\xf1\x97\xa3?\xe9\xbf:\x15\xc20\xe9?^*\xb5\xa8\xa7T\x94\xbf\xc4\x8e7@V|\xea?\xbf\x1d\xac\x02i\x8f\xa1?\xf1\x93\n\x1b\x9b\xab\xeb?\x80\x1f8\xda;\xc7]\xbf\x94\xd7\xba\x07.}\xee?V\x92"\x90\xba\x14\x99\xbf\xbfw=\xbdF\t\xf0?d\xd8=\xbf\xc0e\xa1?m\x89(\xbe\xf2\xbf\xed?\xe3G\x14\xc59\xe5\xb4?\x8a\xf0\xa3,\x90\xc1\xe9?\xa4p#\xa8\x93C\xbc\xbf\xdf\xab\x0e\xe9&{\xf4?2D\x81\x86\x93\x17r?~X\xb49\x87\x12\xf0?\xc1\x07\x9dDk\xc8\xab?"\\N\xa5\xa8\xa3\xf1?^\x08\x8b\xb3\xcfz\x87?\x9e6Ty\x04\xcf\xef?C\xa1\xa5\xd4Yd\xa3?c{\x90\xce\tB\xf0?\xbb\x92\xdcDA<\x97\xbf!\xf6\x85\x91,\xae\xeb?Cmq\x9d\xe4R}\xbft/f\x8e\x8fO\xf0?\x92\xb1\xf3e\xa7y\xa6\xbf\x85t\xa6\xcb\x17\x01\xf1?\xa5|b\x88\xf9\x17\xa7\xbf\xc7.\x93\x8f#\x96\xf0?Y\xdb\x87\xf2\xc5\r\x97?\x1f\x8c8\x12\xbe\xa0\xed?H\xeb\xfai\x1e\x97\x80?\xf2\xdcI\xba=v\xef?\xa2\x9a\xde\xc0k\x89u\xbfG\xdf\xcf\xb9K2\xee?\xf4\xe2\x8e\x83\xc8\x0f\xa5\xbf\x1a0\xd6=\xd9V\xf0?\xe5\xa3\xaf\xcf6\xc5\x82\xbfn=\xe2\xe1e\xff\xef?c\xc6r)\x91}y?\x94- \xee\xce\xb0\xee?;\x15`\xad\x07\xd7\xb0\xbfE+\xcfxp\xd1\xf0?\xfc\xd3H\xef\x04\xc1`\xbf\x87)T\x9c\xf7}\xef?\x148?f\x95\xa5\xa3?\xe8F\xb2\xcbI\x9c\xed?\xca\x8fJ\x16\xb3X\xcf\xbf\xba=[\x90\xb8\x17\x01@\x896\x99\xb7\xb9L\xba?\xb8\x8b\xdd\xaa\x8c*\xee?\x8eh\x94\x8axfl?X\x84\x98\xab\xe4\xdd\xef?\xf0\xb1\x11a\x08\x7f|\xbfb\x11\x0b%\xab\x13\xf0?\xc1\\xw\xf2\xdcy?\x81\xc8\xf0r{Z\xf0?C\xbe\xb1\xae\x8a\x80\xca?\x1b\x98\x9e\xd7k\xa6\xf2?\xcb\x87[\xdbwI\x8b\xbf\xcb\xb3 Cu\xf6\xee?\x92\xa0\xdd\xd9f=\xa1?\xc3\xa73\xe4\xf5P\xe7?\xfa\x9bv\xd5\x9d\xf1\xb1?~\x1f\xc4\x19;d\xed?\x7fs\xd2S g\x9c\xbfmA\x06\t\xf6\xa1\xf0?\xd1\xa0Z\x97!>I?-\xa0\xe7\xe3\x0f\xc8\xef?\xef\xcaY\x8d\xb3\x02\xb2?@\xdb\x10\xe2\x1c\xd9\xec?\xca\xbb\x91`\xa3\xafq?\x9dS\x95\x18\xdd\x85\xee?\xd8L\x8c\xde\\\x13\xb3?\xb7\xf0|%\x9d\xd2\xe9?\xe5?\xa8\x84\xc8\x02\xa9?i\xf4\xac\xa2\x04\x0f\xeb?\xd4\x94U\x86\x80v\xb1?\x06P\x15my\xa0\xef?^\x0b\xd5L\xe7~z?\x85\xb7re{\xbf\xee?\xd1`l\x96G)\xa8?\xb47\xc0\xe1"\xb5\xea?}O"izEW\xbf~\x9c\xed\x12P-\xf0?+\xc9^\x0c=\xa6\x93\xbf$\x80\xb8\x84i\xbc\xef?\xce\xd2\xc8\xf69\xb6\xa4\xbf \x8c\xef\xca\x8e;\xf0??\x0e\xa42\x86\x83\xc0?g\xfb\xa8]a:\xec?:\xe2O\x9c\xbf\x86\xb5\xbf\x01\xaeu\xbb\x821\xf1?\x95y\x1b%\xcf\xc0k?h\x18\x03y\xcd{\xef?o\xfdh~\xccH\xba\xbf\xfd@4\x0b\t\xe9\xf1?\xbe\xaa\x0b\xd71+\xbb?m\xf5\x1e\xa9i\xaa\xe3?8\x0f1\xb4\x15\xf1\x95?\xae\xc3\xb9\xa3\x16W\xf6?\xf54W\x8a\x08\xe7\xb8\xbfkNf\xfc\x19r\xef?y\x85\xb4\x96\x0c]\xae?_M\xfc\x06\x0e\x85\xf0?\x7f\x96\x82({\xb4\x83?\x91\x08\x16\xfdri\xef?\xe5\xd4XnE\xa5y?\xdfI\xa8\x89\xe8\x00\xef?\xc5\xec\xe2\xb4\xb9\xd2\x83?~,\x03\xad1$\xf0?\x1aj@\x01\xd3TV\xbf\x80\xa8\xf1\x0e\xdd\xed\xef?\x87\xc0G\x90\x02\x19\xb1\xbf\t\x1cN\x91n\xc3\xf1?q(?\xc6a\xc4\xa3?\x10]\xaet\x1cQ\xed?\x0c\xad\xeb\xbb\x83\xaa\x8d?\x1b\x15\x0f\xe1\xd8\x9a\xee?|\x12^\xc5!\x0f\xab?\x90\x91\x86\xacM\x10\xf0?u\xaa\xfe#d6`\xbf\xbf1\xc4\x90LC\xf3?:\xe9o\xf2]*\x9f\xbf\x0e\x0f\xa0\xf4\xff\x88\xf0?\xe8\xdc\xa2\xe7\xe1]\x93\xbfR)g\xb1\xa3\xcb\xf0?\xd2\x8e\xac]\xe5\xc1\xca?\x0cH,\xcb\xb2\x9a\xe5?\xae\x02\x9f\xbf}_\x98\xbfg\xfe\x8f\x90\xfc>\xef?^{P\x89v\x07\x85\xbf\xd9\xd2\xeaa\x86\x1b\xf0?D\xde_\x95\xaaZ\xa7?I\xe6\x9d\xa3<M\xee?\x89l\xd6\xe3nv\x99\xbf\x96\x1f&cMg\xee?\xb6g\x9e\xb7l\xfb\xb8\xbf\xc3\xfb\x94\x88\xab\xc1\xf2?\xb0\xae\xdf1\xc2\xdc\xb6?\x8f)\xea\x02:K\xf0?\x87\xe3\x83\x9an#\x8b?\xb7\xcf\x88\x11\xc1\x8c\xf0?-1\x0bp\xf2\xe7\xa7\xbfL\x05\x0cq\xbb*\xef?j\xf1\xd0\x1b\xedQx\xbfY\xe5A\'\x06\x9c\xf0?A\xcd\xfa\xb2\x03\xeb\x8d\xbf\x83\xa1\xea_\xfaz\xf0?\xb6\xcf\xf6\xc5A\xc8\x8c?l\x04\xccP\x12\xcd\xef?\xd3\xe42\x89\x0e\x8ck\xbf\xf3\xb8/\xfc\xe6$\xf0?\x14\x8cm\xcfSX\x9d?I\xc3\xdbv\x9f\xb4\xee?*\xde\x11\xb3\x7f\x04\x80?\xe0\xcd\x90\x06E\xd7\xef?\xc1\xaf0hB\x15d\xbf\xb7G\x1e\x000J\xf1?\xb0\x83\x13\x8c\xfcfX\xbfO)\x02IJs\xf0?oNy\x17\xe7\xe8q\xbf\xb5\xdb}\x8c\xb2,\xef?\x9c\xbf\xc7\x0eC?\xa2\xbf\xd3\xdeh\x13@\xd2\xf0?'
p57
tp58
bag2
(g3
(I0
tp59
g5
tp60
Rp61
(I1
(I2
I438
tp62
g12
I01
S'\xa3gd\x82\xd4i\x9a\xbf\x908\xd5?C\xc1\xf0?\x00\xdc\x85\xe6\x1dy\xa9\xbf\x7f\x10\x07/\x05\xec\xf1?\xfc-\x00\xc6\x0c\xf1\xa3\xbf\t\xb9\r\xd7\xd5\xf2\xee?t\xef\x99{Y\xcc\xa4?\x133W\xa4\x1d\xf5\xe6?`\x8czS\xa6\xd8\x93?\x8b\x8d\x17\xe4\xf6\x92\xec?u\xec\xe2\xd9\xa7\x95\xb7\xbfg\x14\xc8\x8d`\x0e\xf1?\x1eIl\xf2u\xad\x90?R(\x11\x911\x90\xf0?E\x1af\x15\x9a\x11\x92\xbf",\xeb\x9c\xfe\'\xf1?j\xea(\xbdoF\xbb?\xe7\xf6h\x01\xb3}\xf0?V.UA3\xb0\x9e\xbf\xa4\x14\xfc N:\xf2?\xfdk~\x13\xe2\xe3\xa4\xbf)\xc3\xd5\xbe\x1cq\xf0?R\xef\x93\xd7\xdf\xd9\x84\xbf\x16\x06\xdaF\xed\xc8\xed?\x88\x1c\xee\xf7\x01\xb2\xb0?\xfa\xa4a\xd4\xabY\xee?\x06\xfa^Eq\x9b\xae\xbf9\xc9\xb2:\x8f\xf6\xf0?\x0f2X@\xe5\x10\xc3?\xc8\xdb\x8c\xb8\xd7H\xe0?\xa9\x08\x1a\xb2\x18*\x8f?e|U\xfc\xa9\xd2\xef?\xebM%\xe0\xfa\x02\x96?\xa6&\xe6)\x95v\xec?(\xd0A\x9e\x82\xeb\xbe?\x9f+}E%\xd3\xe8?\xdcY=\x89\x83\xe6s?v\xdar\xa1\rv\xef?\x8c\x12A\xd8\xdd\xcew\xbf\x8d\'\x07\xf6\xfb\x95\xef?\x1b\xf8\x91\x83t\x88p?\xc8\xe5\xb3\x90\xf8\xdf\xef?q\x05\n\xbb\xdd\xe9\xb3?\x05y}\xc7\x13!\xea?\xd9I(d\xdb\xfb\xa5?)|\x1d\xf9dn\xf0?\xdf&\xe3\xa3"\x9b\x92\xbf5\xb7\xb1\xad/\xe3\xf0?\x06\xfe*M!Qp\xbfl6\x1fS\xb5\x8a\xf2?\xa4\x0c\x8b\x98\x9f\x8f\x80?\xcc=q\xa95\x89\xec?ZgT\x0b\t\x92\xaa?\xc4M\x19i\xe0\x85\xf1?=?\xb8\xb2\x04\xc4\xb7\xbf\xfd<y\xbakF\xf2?=\xaf\xb3z\x96Q\xad\xbf\x02c\xc5\x01\xee\x15\xf0?\xa0\xc0\xf3\xdb#q\xd9?\xe0\xe9\xc5\x97\x88\xa1\xed?I\xa3\x99[lX\x8e?P\xfb\x84_X\xc3\xec?\xc55\xa8\x00\x08\x18o?\x9846\xa4M>\xef?\x99A\xc8k\x87{\xaf\xbfR\x8e\x98\x8a\xc2T\xf0?.\x8e\xb3\xfe\x98\xa9\xa3\xbf*\xfeL\x1e\xa4\xfd\xf0?\x95\x9c\xc2x\xa1\xec\x97?\x17\xcd\xe8\x8a\x85\x82\xee?\xdeC8-6A\x85\xbf\x05\xa5\xe2\xbe?#\xf0?!\xd1\xc6\xef\xb5\x9b\xa2?\xbe\x91\xe5\xca*\x9d\xeb?\xd81\'L\xcdB\xb8\xbf\xcf\xbaL\x04\xec\xa2\xf4?M\x1e\xf2!\x9c\x9dR\xbf\x07T\nsMI\xf1?\xccCL\x9f.y\xa8\xbf\xa6|\xb0\xa8N\x9f\xf1? \xd2q?\xbf\x14\x91?\x8eE\xb2_\'\x0f\xef?\xdaO`z=\xb9t?\xabq\xe9z\x9b\x99\xf0?\x86\r\x1dv4\xad\x91\xbfc\xe9 a\xf3\xee\xf0?\x0e\x02\x03:\xb4\xdcl\xbf\xaa\xa5\x01\xd2\xc50\xef?\xee\x07\x13\xe4Z\xea\xad?w\x88\xf9\xecw\xf7\xeb?L\x15\x9a\xf7\x82\xb5\x91\xbf\x80\xd96[=\xa1\xf0?lq\xfa\x00j\x9b\xc0?:\x15\xa2\xfb\xd9s\xf0?\x96\xa6\x9c\xcbC\xbd\x95\xbf\xd28\x1e\xae\xefI\xf2?Y\xe3s\x1dO\x1f\xa7\xbf\xbb\x9ag\xef\xe6\x96\xf1?\xa1;RV\xfe+\x90\xbf\x80U\xa5\xc6J\x11\xf0?L\x84\x1a\xf7\xae\x9d\xa3?IY\xb5`sb\xeb?\xdbG\xe7O4A\x9e\xbf\x003\xc3\xce7\xcb\xf0?\xaf\x1b\xbb\n\xf6\x8b\x8a\xbf\x96`\x12\n+\'\xee?\xd1.\n\xc0=\xf0w?qg\x8c\x90o\x8e\xed?\xf1\x86\xc5+\x82\xef\xa5?4\xd9/\x9c\xe2K\xee?H\x90\xa7\xbe[\xba\xb1?\xb4q*\xdc{\x82\xea?\xe5\x90r~\x98,\xb7\xbf\xbe\xf8o\xed?\x94\xf1?\xfd)v\xec*\x90\xa5?\x9f\xdf@\xd9\xb83\xea?\xdf#\xa0\xc4\xe7\xddt?e\xb4<CV\xdc\xf0?3\x7f\xf2\xbd\x1cQ\xb4?\x998\xfa\xf2BI\xe8?L\r\x8dKu$\x95\xbf\xc9\x82QX\xe0\xa2\xee?\xfb\xb7}\xde\xf7D\xb2?X\x1bz\x92\r\x87\xea?k\x06\xb2\xfbI\x94\xa8\xbf\xe1\xa3\x01\xbe\x9d1\xf1?\xa4d=\xab\xd1\x8e\xad\xbf\xd4n\xd0X&\xed\xf1?\xb7kA\xfez,\x95?^x#Rn\xf6\xf0?\x97\xcbE8\x9b\xb3\x83\xbf\xcaU\xcd\x99\x07\xae\xed?\xe1g^q\xa6\x0fh\xbf\xd2\xde)\x02\x06:\xef?\xdd\xdc\x84\xf9\xe2/\x8a\xbfG\xbf\xf6\xb7\x1e\xc3\xf0?\xa0+*\xce\x9a\x08\xa9\xbfyt\xc1\x0bZ\x83\xef?q\xa5*\xe7<\xb8\xbc?\xf6u\x0b\x8dT\x8c\xe7?\x95\xb6Ua(\xa4b?Y\x19\x02\x97}\x8e\xee?\xc9\x84W7\xa4\xdf\x9b?sV^\x17\xb4\xb0\xef?3\x90];\x93\xb5\x97?\xc6\xf0\xbf1\x9bK\xf0?\xc1\xa8y \x0f\t\x81\xbf\xf1\xaa\xbe\xb7\x19\x07\xef?XQ\xa9\xbfk\x9b\x93\xbfK\xe4\xfc`\xb5\'\xf0?\xf1\x9a7\xe5\xe5\xbb\x86?\x83\xd0\xfbZ\x11\x03\xf1?\xba\x13\x1e(\xaf\xe8k?d\x9e\xbet\xf9x\xef?\xc0=\xe6\x06Ei\xb2\xbf\x96\x95`\xf8\xc0\xa5\xf0?\xfcd\xa3hyJ\xa6?\xf5E%\xb3\xddz\xe9?\x80?\xa9\x95\xab\x17\x99?9k\xb2\x13\x86\xbb\xeb?)\xd1\xd1\xc1U\xdd\xb8\xbf\x0eM\x18e7~\xf5?\xbe\xa5\xf2^\xea\x0b\xb4?\x96\x1d\x9c\x08C\xf5\xe9?\xfcy\x0b\xabZB\xb5?\xe1Z\xc9.\xce|\xec?\xdb\xc7\xb5i\x0c\x0f\x9e\xbfCn\n$r\x8b\xf1?\x14|5(TD\x97?IA\x8dw\x14G\xee?\xa5\xd3\x1dY\x9b\xd6\x80\xbfg}\xcb\x0b 6\xef?\xdf\x8d\r\xbcV\xf6p\xbft\xe2\xe7F7\xbf\xf0?\x87\xf37#\x7f\xc2]?\xfbv\xbdo+\x7f\xee?5\xa9\xb7T\'\xfe\xa0?"\xb1\xc9y\xb70\xed?!\t\xf5\xc9\'\x86M\xbf\xf4\xbb\xa7\x10@\x9a\xef?\xe4\xf2\x8fj,\xa2\x8d\xbf\xa0q:\xaa\xad3\xf1?JY\x9d\x91\xa9\\\xc2\xbf\x1d&&\xcfm\x93\xf8?\xfe\xe6\x03~\x9c\xf9\x97?\x93K\xe3\xad\x8a\xf9\xed?M\xd0\x96\xd5\x80x\x98\xbf`\xc0(\x85.8\xef?\xd0\xe1\x05\xf0\xef\x83R?X`\x00\xcet\x1a\xf0?\xed\n\xc1\xbb^\xf2\xc1?3{#^\x0cN\xeb?B\xab\xdcb\xdb\x15\xa2?\xa7\x9e_\x91|#\xec?\xd1r&*$\xdc\x9a\xbf\x95\xdf\x02\x88\xa1Q\xf1?T\x00\xbd\x99\xaatx?g\x8eY\xc7\xb7V\xee?W\xf7\x9e\xdf\xca#\xbc?\xd6\xd3Do\xc8\xf9\xec?\xbc\x14\xb8]\xaa\xba\x97\xbf\xbe\xcf\x0b\xfb\xe1:\xef?\xce\xcb\xde\x053\x98m\xbf}\xb9NV(\xa0\xf2?\x84\xc3F\xd6\x7f\x9c\x9e\xbfF\xa4\xffsX\xed\xef?p\xd2\x12\xb2\xe3\xe0\xa0\xbf\xbf\xdd\xc1LQ\x80\xf0?\xb6\xc5\xf8\xb4\xb7Gi?\xcb\x14\xf1\x0b\x92E\xed?u\x10i\x01\xc1\xcav\xbf34\x12\x06T\xfb\xee?\xf7\x16\xbeP\x17\x95~\xbf\xd2\x0b\xfd=\xeb\xba\xed?\x0e\xf8\xaf\x0f\xd5\x81\x99\xbf\n\xb0L\x1c\xe9\xe4\xf1?`\xee\xc2\x9e%{y?Ja\x87\xf2C\xa4\xf0?[\xd6Z\xc5\\\xd2\xb3\xbf\x10\xfe\x8e\x1d\x8b\xec\xf1?c\xef<\x92\xb4\x9d\xbb?6)M\xbf\xf6\xbf\xe4?\xf8\xf5\xa3\xdc\xf4\xe7\xaf\xbfs\xea\xde8\tZ\xf1?\x0e\xcc\xf2W\xd9\xbc\x8d\xbfd\x9aV\xde\xda.\xef?\x9d\x1e\xa7\x97\xbe\xd4\xb2?\x14\x8fD\xfe=\xad\xe6?\xef\x02\x17\xf8\x91\xc4\x83?W\xdel(\xcc\xcb\xed?{C\x08\xb1\xff{\xa7\xbf\xb5)\xa1\x91W\x01\xf1?oK=\xf0\xe5g\x97\xbfQ\xe2\xe8>\xa08\xef??\x9b\x06=\x06\x88\xa4?\xc1\xf4\xfd\xe9\xf1Y\xe8?d\x8b+\xe6\xe5eT?\x15x%\x9f\x8bd\xee?\xa5_\xb4/\xb6\xb3w?\x807P\x8a\xfc\x17\xf1?\xf8\x80\x91c\xa7\x96\x8e\xbf{\xd2\xa4\xc00\xdb\xef?\xd3\xbd\xd8\xb3j;\x87?\xeen\x9b\\\x98\xb5\xf0?\x1a\x1c\x04\xf7\x9f8\xba?\n\x04;\xee46\xed?b\xcf+\xed\xfcvi\xbf\x0c\xa3\x1e\x90\x8bP\xef?\x02P\xc62aws\xbf\xa2$\x0c\x98\xd4\xcc\xf1?\x90\x8d|\xc2\x96i\xa9?x\x7f\x1e\xb6\x86\xa5\xee?\x95\xb3\x04]\x8b\xec\xb1\xbfh\xdd>\x95S3\xf5?\x11p|l\x0e\x13\xa9?S\x97\x91\xe7\x94\x18\xef?\xe5\xc3J\x1f\xa8\x90\xb3?\xb3\xd7\xd2\x91\xb4\xee\xeb?n\x10C\x1e\xfe\x95\xd4?\xa9\xd9N~k\x00\xdc?M\xdcJW\xfc#B\xbfR3\xd2\xfaM\x8b\xef? \xe8\xb9;\x80\xf0m\xbf\xc4\x0bagj\x93\xef?v]A\xa8\x80\x96\x92?\x13\x91\xaa\xc1\x893\xed?\xec\xfd1\x91-\xb9\x98\xbfr!\x10\x14aW\xef?wn\xfcb\x8dY\xa0\xbfV%\x1f\x88\x00\xf8\xee?\x9c\x89\xc5,\xc3\x13\xa5\xbfZ\x7f%\x94u\xfe\xee?~\x02\xe1\xac)\xcf\x82\xbf\x0e\x0e\xa3v\x0f\xc3\xee?\xcc\x97\x99\nH\xed\x7f\xbf\x93\xe9\xca-\xbcD\xf0?\xa2\xd0\xf1\x93\x9d\xf9u?\xb5\x8b\xc8\x94q\xa9\xef?\xc2\xa6\xb7\xb2\xfcz\xb1\xbf\x0fBGB\xdf-\xf1?\xffSX\x97\x9c\xe3\xa5\xbf\n*\xf9\xd11\xff\xf3?i\xe8\xb5h\xd9\xc5\xb6?iA|1\xa7\xad\xe9?G\xda\x9d\xc5]\x8f\xa3\xbf\x12\xa6\x1c\x1d\x7f\x05\xf0?lg\x0f\x10\x03\xfc\xb5?]\xb4k\xdd\x9b>\xe8?W\xf7D\x185j\xb0\xbfk\xc1\xf8X\xd9\xed\xf0?}&\xd7\x05)o\xa6\xbf\\\xd13\x9dRL\xf0?M\x1c\xc9\xefs\'\x8f\xbfe[\xde\x8a\x1f#\xf0?+\x12\xfc\xdb\x1f\x9b\xa6\xbf+/{<\x8cC\xf2?2\xc7\x901\xa4\xda\xb2?\xbe\x9a\xa1^\x14i\xe6?\xf6:\x9eOT\x1e\x86\xbf`q\x94\xb5;\xd3\xee?3\x16\xc3\xc4\x89Z\x9f?\x1a\xe6\'\xd3\x17\xd1\xee?\xd6\xbcR-\x03\xc1\x9e?\x1b\xbc\x93(O\x98\xee?\xbd\x94\n\xf0g\xfd\xa7\xbf\x82\x1a\x93\xd1\xeb\xac\xf2?&L\xc8\xd1\xe1\'\xc4?\x15+\x15\x00\xe0\xd8\xe4?\x03\xa7e.(z\xae?wm~\xbc\x9f\xd4\xef?=Q /\x8b8\xb0\xbf\xe1\x06\xd3+f\xe5\xf1?\x0b\x94\xd2\x9a\xc5\x14\xa3\xbfx\x13)\xa2\x1c\xad\xf0?7\x8dt,\x9fm\x95?\xd3h\xb6Q\xb6\xf1\xef?\x80\xa7\xc9\x92\x00\xa6a\xbf\x0b\xd0\xb3\xd5\x0c\x9d\xf2?\xbf\xc5O\xba\xc7\xa9\xa2\xbf\xab/\xe6\x90\x00?\xef?s/\xbf\xaf\xfb0o\xbf\xf6c\x8f\xf2\x8f\x13\xf0?\x90@Y\xe3Z\xd9|\xbfm\xec\xe60\x01\xb4\xee?}Mk\xa4\xb61\x92\xbf\xf5\xd8&\xa3^.\xf0?\xf7\xe7\x9e\x95\xc9X\xab?\xf3C\x01z\x00W\xf2?\xd7%\x98\x03\xbdf\xb6\xbf]\xce74\x07J\xf1?\x8c\xc3x\xf7=\xae\xa8\xbff\xea\xbd\xb3\x96\xe0\xf1?\xaf\xe4\xdb0}\xca\\?\xaab\xdf\x96\xb0\x81\xee?l\xf2\xda\x05\x04\xe6\x82\xbf\xf8A|\xf6\x9e2\xf1?d\xa3\xb2j\x9f\xd1\xa0\xbf`\xb6\xefV\xceN\xf0?#\x1d9\xd4n\xc2\x83?\xe6]\xb1\xac\xae;\xec?\xe3\x0e9\xe2\x1e\xa5\xc5\xbfeGq\xf5_\xce\xf9?\xa6<)`7\x8e\xa6\xbf\xddec\xcc\xbe6\xf1?\xe9\xb3x\xdd5\x85\xc0\xbf\x19]v\xa5*\xda\xf5?\x93\xf8\xd0\xa6Z\\|?\x8b\nr\x08\xda\xcd\xef?\x81\x0bG\xeaam\xb0\xbf\'B\x9e\xd5e\xe5\xf0?Iv\xbb=Z\xf4t\xbfh\\X\xec\x84k\xef?\xaa\n(\xed\x0c\x19\xc9\xbf\xc8\x17\xfa\x19\xa4}\x00@I}\x08\xa1\xab\xd0a?\x84,k\xdf\xb9\xf6\xef?\x81\xdb\xafc\xa27\xb3?\x85u\x10/\t\x99\xed?\x88\t\xb7W\x89m9\xbf\xa4(I\xd6\x95\x1e\xf0?2m\xa2o\xdc\x9b\x9b?\xd1\x0f\xd5<\xd52\xf0?#\x92\xf6\x93w\x0e\x90\xbf\xe7\xce\xce\x02p8\xf0?%E\x92\x83\xd2\xef\x92\xbf\x91 \xf4\x93\xb29\xf0?\xab3\xc8\x9e\x07\xeb\x95?\xb1?\xcf\x17(\xca\xed?7^\xfat\xb3\xdb\x8e\xbf\xa2IZ\xc9\x9c \xf0?\x1csF\x06\x9a\x08\x9b\xbfV\x80\x12-\xbb&\xf0?\'\xf1\x1a}%\xd8\xa0?\x86\x94\xe9\xf2\xd4B\xed?\xc8ny\x8d\x1ep\xac\xbf8&\x93r\xbe\xe4\xf0?J\xa0\n\xc1A\x08\xa3?R\xbd\xb7n\xfb\xbd\xeb?\xc2o\xcc\xf8\xa4n\x7f?\xc0\xf1\xa6\tL\xc5\xf0?K%\xb9w\xed/s\xbf8\x90\x82l\xb9\xb6\xed?\xd8*\x83\xe0\xd1\xa6\xae?h\xdc\x12\xd3\x9a\x8d\xe9?\x02s\xb0\xa53/\xc0\xbfe\xdc\xa1\xe3\xb4\xf8\xf2?k\xd3H\x1cc"\x9b?(\xdd?\xdb\x90a\xef?\xfb\xe6\xa0\xbb\xc1f\x9b?\xf8F1i\xc9\xa1\xee?}\'\x99\x94\xd6\x95\xc0?\x9c\x9fg\xdas\xcd\xec?S=F\x0f\x92G\xb1?\x02?O\xdf/\x8f\xe9?\x9bR\x1c/\x18uf?\xb0\xb1\xebI\x00\x8f\xef?\x19\x1aBNs\xce\xaf\xbf^\xee\xab8\x03t\xf3?\xd1q\xb3\xef\xfc;\x9f?i\xa3\x97\xdaq\xfe\xeb?\xb7\x17\xce]\xf0\xf2\x9d\xbf\xd8\xae\xbfH(\xd7\xee? \xa0\x8b\x91^\x10\x9e\xbf\x17\x7f\xf9[\xf6\xf6\xee?\x90\xa2\xfa\xa7?\x14w\xbf\xba\n\xad\xe2\xb7\xd7\xef?S\x9dMH\x9a\xed\xa0\xbfyB\x04\x06F\xcc\xf0?\x12\x02\x05i\xa6\xc0\xa3?\xeeE\xa5\xbe;\xbd\xef?\xcb\xa2\x83\r{Z\x98?\xc8&\r6Z~\xed?\xbf\xd4\x12\x01O\xb8g?\xe0)\xaf\xb11D\xef?%ew9\xa7\xa5\xa5?]P\xc9\xa1\x9b"\xeb?\x0e\xcf\x17\x95\xfc\xf2\xb0\xbfc\xb2\x18\xda/\xd1\xf2?B(\xf0z\x10G\xa3?`\xd4)A\xe1\xff\xec?\x0b\\Q\x02|E\x8d\xbf\xd9\x10\xe4\x86\xfd#\xf0?\xd1\x91\n\xfe\xb9\xa3\x85\xbf\xd2aV\xf4\x17\x83\xf1?)b`V\xbc\xac\xb9?\xd8\\\x9a\xdb\x95C\xea?~\xf6\xf6\'kH\xa0\xbfcK\xfd#\xec\xac\xf1?\xb9\x17uh\xc1\x98\x9c?\xd1\x96m\xd9\xf0\xf8\xee?\xbc^e\xa5\xc2\xb6\x86\xbf\x86\xc7\xeci-\x9e\xf0?\x8f\xc5Q\xc2\xa9\xcb\xae\xbf?Zwo-\xc6\xf2?\xbe\xcd\xbeu\xf7\xb2\xa7?U 9|}\x15\xec?\xd1\xfb\xd0q\x08\xb7\x94?-\x1f\x9a=e\xa7\xf2?S\xfd"E^\x19\x9e\xbf\xd7\x95\x0b\xa4x\xae\xf1?\xa8\xa0>W[f\x82\xbfP\xa0\xad\xa1l\x9a\xed?\xd3^\x16\xe8\x92O\xb9\xbf\x1e \xeeFp\x07\xf4?\xa4\x7f:{\xec\x9d}?\xc5\x0b\x07X.f\xee?q?\x01\x8e`\xe7\x91?\xe6\xd2\xe6\x83y\xc8\xee?\xe5J\xbb\xf3\x01\x8f\xa7\xbfF\xe1\x8e\xbf\xad\x86\xf1?\x8bM:+\x94\xa3\xb0?T\xe2\xdes\xa8\xb9\xea?\x04\x14"\xd1\x84\x91\x98\xbf\x8f\xa1\xec\x98\xc1\xff\xf1?|\xb5}\\\x80\x8c\xae?\xcbkZ\xfe\xfc\x99\xf0?\x1ed\xb6\x9c`\xae\xa4\xbf,a\x1a\xf7\x1cF\xee?k\x9ctN+\xc9\x96\xbf\x94\x04I\t\xbd\xfd\xf0?\xd5\xc8\xd4/\x16\x14\x96\xbf\x9fl\xa9\xab9\xe4\xf0?m\x84\xed\x82\x15RX?:\'\x98\x08-5\xed?\x02\xd6\x01F\xcbE\x96?b\xe6c\xcf\xb6\x94\xf0?\xec\xc8\x1f\xb1?\x8b\x88?\x8c\xea\xf5\xdf\xe4\x82\xf0?\x07+\xba\xd9F\x08\x9e\xbfT\xa9;\xc3\xf9\x0f\xef?\xc0\x8c\xb1\x17\xeek\xa3?\xff\x8a\x88[\xa8\x16\xec?\xf7\xb7>lN\x0b\x95\xbf\x9fj\xed=\xa8\x1a\xf0?\xf6\xd1<.)\xc9l\xbf\xf8\xc2yl\xc9$\xf0?\x0f\x9ft?\x92\xaa\xae\xbf\x1f\n\x86\xadN\x05\xf3?3\x19(\xbc6\xaf\x9f\xbf!\xc9\x1f4\xc0\xb9\xf1?\x03\x07F\xd7U3\x9f\xbf\x93\x8e\x8eM\xb5\x99\xf1?B\xbf\xd3IG\xe7\xa8?\x8b\xc3\xf7\x19\xf5\x14\xec?\xa9b\xce\x90\xb1\x95\x91?\xab\x98\xfd\x1b\xc3\xd6\xef?\x89S^\x13\xd0\xdd\x9d\xbfBu1\xddp\xc6\xf0?\xb4\xd5\xc5\xc2\xf5q\x98?O\xce\x17\x1a.r\xed?\x931Er6\xd4\xa4?\x8d\xf5)\xd7\xd4\xc7\xef?\x85\x8f\x9a\x16x\xb9\xa3\xbf\xeb\xb9\x87\x9dte\xee?\x9b\xe1\xb2DZ\x94\x99?\x00\xca\xa3\xe0\xa0j\xec?R\xb5\xee\x8c\xda\xf2\x9b?\xe9KL\x9fK\xa8\xef?\xcb\xd7\xf9\xc5O\x0b\x82\xbfX\xa3\xfa|\xd0\xd8\xf1?@\xfe\x15\xd44C\x88\xbfj\x00P\xaa!o\xef?l\xa9M&\x1aE\xab\xbf\xf8O\xd5\xfcS4\xf3?\x1bB\xf0\x8e\x0c\x8e\xa6\xbfb\xb9w\x19.\xa9\xf2?\x1eV\xed\'"\xeb\x9b?\xe1%\xe8\xf6^\xd8\xec?\x98\x1d\x91\r\xa4\xd2\x9f\xbf\xf7\xc6\xe2W4\r\xf3?\x12XL\xda\x9a\x92k?\xd6\xd5\x1c\x81\xbc\xc9\xec?\xe8;\x1a6\xbc\x06\xb8\xbf\x84fw\x16\xbb\x1f\xf1?\xb2\xfb]\xefm\x85\xb5?\x95\x17\xbc\x009J\xf0?\xd4\x93\xb2\xfds\xfb\xa4?\xcc\'"^y\x18\xf0?\xf32Qr\xcf v?\x84\xeb\xb2\xe5D\xde\xf0?\xc6m_\xd2S\xa3\xa1?\xb2\xa0\x14\xa1\x8e|\xec?\xcbA~9\xcd\x81\xa5?#~U\xbf:\x1e\xf1?\x1d\x0bW\xf6xwi?\x82\xa3\'\xceW\x0b\xf0?\xde\xb3\x9e\x14s\xad\xbb\xbfx\xf9A\xa8\x0e^\xf1?+B\xd6\x7foc\xa0\xbf \xa5\x12G\x99%\xee?KL\xb4\xe3\x8e\x07N\xbf[\xa5\xadfC\xc3\xf1?\x82sg\xdc\x0c\xb2\xb4\xbf\xb1s\x1fq\xfdp\xf1?\xf9\xcb\xaa\x1bz\xaa\x11\xbf8\xd0\xd0{\x954\xef?\xce\x14\xa7D!/\xbc?\xf8}K|\xb9\xef\xe9?5K2j\x9fz\x99?W\xc5\x14y_C\xea?P\x1f\xab@b\xb3\xa1?<3O<\n\x9e\xed?"\xe2\x89~\xf7\xcb\xad\xbf\x08\xe0\xbe\xfa\xdf\xff\xe6?Q\xbc\xa1\xca-\xb3\xaa?\xbf\xe4\xc49\x18:\xfd?W\xa1\xcd\xe0\xe9\xce\xa8?\xe4\xf1\xf6\x84\xfa\xbc\xf0?\xe5\x11@t\xcc\x89q?\x0bV\xc6\xebm=\xf0?\x8d\x9c\x0b<\x8a\x92\x81\xbf\x88 V>+j\xef?U\xfc\x91\xb2\xe3\x90\xac\xbf_~\x03\xab(\xdf\xf2?L\xf2\xbd\x8a\xf8\x19\x91\xbf\x02T\xd2\xdcC\x0f\xf0?m\x00U\xf8\x00\xa6\xd1?D\x04E\xdf\xc85\xe4?\xe5D\xf5\xeb\xd0\xa0\xa2?\xa5#\x1f\x16\xe9\xfe\xf0?\xfd\x8b\xa5\x18\t \xac?\x1aq\xe1\xc6-\x0f\xf0?>\xb7E\x00M\x05\x9e\xbf\xd6\x8a\r\xbeh\xc0\xf0?\\a,E-\xa8\x8b?\x7f\xbeug\x05\x90\xef?8\x99\x96\x14\xe9\x88\x8d\xbf\x8e\x11d_aa\xef?Q5OT\xdd\'t\xbf\x9d\xad\xe2\x10@\xa2\xf0?\x0869\xce\xd7\xc4a\xbfk\xe8\xb57R\x9f\xf0?\x1e\xc6\x8d\xaa\xc3\t\x8f?\xbd\x1f\xaf\x9e\x04?\xef?\x95\xae\x19\xae\r\xa8\x9b\xbfG\xf7\x83\xee\xa3/\xf1?\x17\xb8\xfa\xd68\xba\x93\xbf\xbfY\xb7\x07\x13\x15\xf0?l\xdf\xaez\xfc\x9e\xa2\xbfx\xa6r\x1bO\x9a\xf0?48\xa1O\x05\xa1c?8\x18\x9b\x17.\x1e\xf0?\xb5\xc0\x05\x14\xf2\xd7\xa4?\x14\\\xb1<b0\xeb?\xf3\t\xd6\x01\x13\x1d\xa4\xbf\xe8\x0c\x026\xc2\xed\xf1?\x83\x9f\xe7W\x17N\xa4\xbf\x03f\t@\xbd\xcc\xf2?\x9fs<\xb7\xba4\x81\xbf\\H\xe6\x10w1\xf0?\xb6\x9d\xe7\x02\x01#\x9a\xbf\xca\xd6\xef\xd3\xfc\xf7\xee?\xa8\x08\xb2NG\xe1\xc2?\xfb\xbb\x1d1\xb30\xe8?\x10\xf5\xdb\x95,by\xbf\x0c\xa5#3]>\xef?\x9cK\x81\xe0:\x9fn?(7\x00\xaa;\x8d\xf0?\xd7\xec\xfd\x90\x088\x85\xbfCQk\xc6iW\xf0?\n\x1a\xd7\x1f\xfc\xca\xb5?\xb4\x0c\x04\xd4)\xbf\xee?\xf4\xa1\xa6\x07\xab\x85\xaa\xbf;\x004\xc4I\x08\xf1?\xa5\xc3kf\x9cR\x90\xbf-i\xeb?\xf0\xad\xf0?y3\xd7\xbd\xc4\xa5\x82\xbf\xeeJ6\x8a\x94\x17\xed?\x93\x0ft3xz\x93\xbf\x92\x82\xac1\xd8>\xf2?*\xa8\t\xb6O\x88\x94?&\x05\x9d\x198\xe5\xed?\\=\x87\xfd\xa9;\x8d\xbfjqr\xc4\x8a\x95\xf2?\xac\x99?\x8d\x8c\xa7\xb0\xbf\x9f[\xe4\x9c\xa7\xe6\xf1?a\xbd\xf7"\xc5\x8d\xa0\xbfR&7\x00\x1b\xbc\xf0?\xf0\xa4@\xec\xf0\x9a\x00\xbf\x1a\xd4+\xd7\xcaG\xf0?\x11\xcbH\xa6\xe6\x8c\xc2?\xe0\xc7N\x12g\x8f\xe8?pe\xad\x86\x8a\x08\x8a\xbf\xf1<\x03\x8c\x00\xc5\xf0?>\xa8Y\xa5\x85\x08\xa5\xbf\xac.A\x03\x95;\xf1?\x12U\xd7\x86h\xb0Z\xbf\xeb\xa5\xa6\xc1\xad\xca\xf2?"k2\x9dY,|\xbf\x95\x87\xebX\x88\xae\xef?1\x86\x99\xff\'\x11\x7f?\x92&\xaf\xae\xec\xa4\xee?T\x02x\xf8\x7f\xb9\x9a\xbf\x92\x1fi\xbb\xbaf\xf1?\x95F\xbdU\xe8\x18\x92?\xe1\xbb:$4\x88\xec?\x82({gjK\x98\xbf{\xfb@)\x19\xf1\xec?{r\xf8E\xb1\xa3\xaa?3\xc1\x8f\x9ejw\xeb?+:\xf8\xc3e\xcdA\xbf\xe4\xda\xcc|6x\xef?5\xa1&\xfe\x1f\xa0[\xbf\xe8\x8a\xa0\\\x08\x1a\xf0?\x9bHT\xf2(\x80\xa1?#\x99\x8a\x11o\t\xf1?n\x99\x86&\x9e\x8e\xa6?\x1f\x89\xc7\x1eD\xf6\xed?G\x9f\xfe\x02\xac\xcbk?i\x86\x9dp)Y\xf0?o\xd6lAE\xc5\x8e\xbf\x1ek>\xcb\xdc>\xf0?\xd1\xa9\x10\xfev\xab\x85\xbf\x0f\xd3\xb5`\x0f\x84\xef?\xd0\xb1\xbb\n\xbdm\x86\xbf_T\x04\xa2A\x18\xf0?\xeb4K\xd0\x87\xfb\xa3\xbfy\xbeg\xd3O\xfb\xf0?\xec\xb9^\xdd\xe6S\xad?\x12\xe9+\'\x82p\xee?T\xdc\xabHB\xb1w?M\x00\x89~\xa6\x8e\xee?\x87G\xe9{Vl\xb4\xbfgs\x8e\xc2l\x86\xf0?\x1c(\x10\xb0\x8d\xbfr?\x90e\x85\x9aYi\xed?\xc9\x9ea!\xbc6\x9d?#Bi\x0c\xc0)\xea?\x01\xb5\xcfR&=\xa9?n\x1b\xd3\xb1\xf1\x02\xee?\x85T\r\xce\x01\xc6\x80\xbf\'e)\x89\x8a9\xf0?\xdf\x0bIa\xa8\x14p\xbf\xbeT0\xfdxf\xf0?3\xcf\x8d\xac\xe1FD\xbf\x1e8\x9b\x16g\x87\xef?\xe6ek\xd1]l\xb2?\xe2s>\x81\xd0\xd1\xee?L\xa0\xc7\x00\xa3D\xb6?\xd06\xa2\x8b\x8b\x0c\xec?\x0b\xabC\x8fMT\xb2\xbf\x8c\x94@\x89\xe7\xd2\xf0?\xa0\xd6\xa6\xe9\x83/\x80\xbfe\xa7\x87t\xf1\x0e\xf0?O~\xd8c(\xa8\x94\xbf\xcb_\xfa\x9f\xc6\x9c\xf0?(\x18U\xe08\x90x?n\xc981\xa0\xf6\xef?f]2?b\xacR?M\xd5z\xcb~\xe3\xef?\xf2\x02(\xdb7\x86O?z\xd8\xfb9\x15\x8a\xf0?\xc5\x08\xf2\xedyi\x82?\xa6\x17\xc5\x7f\xa8\xa9\xec?z9\xe8\xe5\x1c\xc6\x98?\\`1]u\x96\xec?\xbd\t9<\x8e4\xac?\xf5\xe3\x85\xf5k)\xeb?+\xc4P\x0b\xda\xcaR\xbf\n\x8a)\xc0\xb3\xc9\xf0?\xca\x14r2\xe0\x89\xa8\xbfN=\xa4\x9biK\xf2?z+\xc2\xfa\xadIe?\x8d\xb7*\xa3_p\xee?\xf7zeo\xbah\xa8\xbf!\x0b\x87\xbb\x96\xc0\xf0?F\xcb|\xb6\x10\x1f4\xbf\xcfB\x7f\xa3\xcf:\xf1?\x80\xcfa\xd2\xe4\xce\x8d\xbf\x89#\xc4JN\xbb\xf4?\x84\x8fV\xfe/23\xbf\xfd^\xee i\xd9\xef?\x01U\x89L\xe7\xc2\x94\xbfL\x19\xa10?\xaa\xef?\xbc\x93\xd0S\xfd\xd7\x98\xbf\xe2\x144 \x8f\x9a\xf8?\r\x89DS\\\xdc\x9e?\xa57@Ike\xf1?j\xb0\xdf\xad\xea,\x8f\xbfIdT\x07\xb4\xce\xee?\xe7C~\xd9+\xe9\xbf?\xc0\r\xfcbX\x81\xec?\xfb\x97\xd1p\x01\xdc\xa5\xbf\t\x02\xfa\nH\xfc\xf0?\xa6ZL\xc4QA\xab\xbf\xe3e\xca\x90+\x81\xf3?\xcc\x1d<2\x0c>\xc9?\x94\x1a\xff\xf4H.\xdd?\xcd\x91\xf1o\x1d<\x84?\x88C\xf9\xc0\xab\xe0\xef?y\x80\x9fu\xc3p\xab?Y\x03\xb81\x15U\xe6?\xd2&M\xef\x87\x9a\xa1\xbfR[\xe3\xe2\xbe%\xf2?\xb7n\xfd\xeb5\xa9z?F\xe4C"\xe9\x98\xef?:\xb6\xe2/\xe5L\xb1?hR\xc9\xc0\x18Y\xee?\x05\xa9\x9d\x10+w\x99?\xff\x88\xe5Q>\x81\xee??\xbd\xe0\xe3\xac\x86\xc4?~5\xd5\xb2\xbb{\xe7?\x94(a\xab\xff\x83\x95?\xc2\xb1\r \xadc\xec?g\x95\x97k!\x9d\xab\xbfn\xb1\xb4\x99\xef\xe8\xf1?<4\xb0\x14\x17\xbc\xc5\xbfl\xac~\x95\xf4]\xf5?\xfd;\xba\xac\xec\x93\xb2\xbfo-o\x16\n\x02\xf2?D \xe1\x0b\x16\xc0x?^\x82\xc6\x07\r\x88\xef?)_\x88\t\xb8|\x80\xbf\x8a7\xc9\r\x0eX\xed?V\'\xf1\xba\x04t\xb0?\xbe\x93\n\xa4\xa8]\xea?a\xcf\x9e\x16\xb3\x13\xa2?!\xa19\x7f\xf8\xbb\xea?v\xff\r_Tm\x8b?v\xf0b\x1d\xee\xe6\xed?\xbbA\xb8\x03T\x88\x88\xbf$\xbf\xa2\xd2\x91@\xf0?\'\xfb\xf9\xfc)\xa8\xb7\xbf\xc3#\x94\xad\xb9i\xf4?9\x1c&\x19\x17\x9f\xb5?\xe7\xdd\x7f\t\x1e0\xe7?(pG\xd8$\xa1\x90\xbf$|\x16\xca\xd8\xca\xf0?\xe3\xd3(dL\xbfZ\xbf\xa4u>\x89\xd9a\xf0?\x95\xb6\xd1\xb0\x8f-\x85\xbf\xf8d%\x86\x84C\xef?\xff>\xb0\x1f\xfc4\x9f?\x01\x91>\xd0j\xc4\xee?L4QJ\xe0\xea\x8b\xbf+\xda\xe5\x97S\xca\xef?.m\xd1\x8co\x9e\x96\xbf\x8d\x96y\xef\xb4\xec\xf0?\x8d\xc2\xa9\x17\xb2\xd0\x8b?I\x11ty\']\xf0?\x1d\xf3\x10\xe07\x9d\x97\xbf\x95q\xe4\x81\xc6w\xf1?\x99\x1fA|W\x8d\xb0?W1dc}\xc3\xee?(]\xec\xc9\x1c\xba\xa3\xbf\xe9\xfe\xb7\xd4\xa0\xfb\xf2?\xca\x9c\xf7\x15\x1e\x02\x90?\x16O]n\xbb\x8d\xe8?\x92\x1f\xba\xb7n{\xb4\xbf\xf9\xb9\xaaU\x11Z\xf2?\xe8\xa2=\x03\xd0{\xa2\xbf\xc0\x12R\xf43I\xee?\x88xuI\xe4f\xb8?jt\xc3\xd5\xdf\xbd\xee?/1\x05\xdb\x12x\xa1\xbf9\x8c\xf3Se8\xf1?\x91\xe2-\x10\xf8\xc6\x98\xbfh\xc9\xb3\x8a\xa5I\xf2?\\+\xbb<[8\x90\xbft,y\xf3u\xab\xf0?de\xf19\xa4\xe6\xa7?\xcc\x02\x96j\x8c\x00\xef?h\x80\xa7\xe7\x7f\xab~\xbf\xa6\x86\xde\xaf\x96o\xf0?g\xf4\xb5\xaa\xe9\xdd\x9e\xbfH\x0c\xbatV\xd9\xf1?\x1eb\xf84=\xe4s\xbfN\xcf\xbfD\xe6\xc4\xef?\xd0\xed\x91\x97\x16q\xa4\xbf\x7fmN\xafN\xda\xf0?\xf5\xe7\x90&\\\xc8\xcd?\xa1\xc4\x00\x14\xf6\xb4\xea?\xd1\xf6\xb1\xe7\xc4\xd9\xe7?`Mc\xb6t\x11\xed?\xb4,\xb3(\xd1S\x91\xbfB\x14\x12\x14\xc5\xf3\xf2?Lt\xc5l\x13\xabs?:*u9Lt\xef?:\x18T\x04R@\xa1\xbf\x104Em\x7f\xdf\xf0?\x92/iW\xc9\xc6\x97?`\x9a\x0f\x85Ba\xef?\xac\x840\xc0\x06\xb3\xa4?\xf0\xdd5P\x04}\xf0?\r,a\xe8\x0b\x80d?5uC6\xb5\xcc\xef?\x89:/\xa7C!\xd1\xbf\xd4\xab\x0e\xa7vC\xfa?A\xedPy 4\xa6?\x97\xa0\x8a\x12\xa3\x0f\xf0?\xb0\x01\xf5y\xc2\x91\x95?W\xca\x1ck\xf2[\xec?"`\x93w4u\xa4?\xe8\xc6\xde\xd4\xe14\xed?\x85\xc2\xcem\x0f(\xae\xbf\x98`\xfc\xc2\x82\xca\xef?\t\xa7\x84m\x01\xc2\xb6?SD\x92\xafP\xa1\xe6?\x0c\x88\xab\xffng\x90?\t|\xe8\x83\x11n\xf0?-\xe1\x08n#\x1e\x9c\xbf\x81\xe2\xb0\xa5\xd5\x8b\xed?N\xb2\x7f\xa6vZa?\xc1\xc1\xc1C\xb3\xe4\xef?\xf4\x88\xf9+\xb0\xdf\xa0\xbf0\x1dJ\x0c1s\xf1?U/\xd0>\xfbD\xa6?D\xf4=.\xf7N\xee?\xdc/\xe6\xef\xd3\xa8{\xbfz\xe9b\xedW\x90\xf0?\\\xc4\xf0S6h\xa5\xbfIH_\x88k4\xf1?\x82\xe0\x13\xa2\xe6\x1c\x9f?9\xc3\x82\x18\x1fu\xef?%=\xdc\xc6]\xe6\xbb?\\\xceK\xfd\'\xc3\xe3?[\x0c\xdcy\xd9\x1d\xaa\xbf*W\xf0\\\xed@\xf6?\xb4\xb2\xaf\xda\x9d\xe2\xa8\xbf\xfcX\\\x0fd\xff\xf1?#\x02Y\xd6\xe3\x85\xab?\x88\xfb.\x955-\xea?\x9d\xcf\xb4\x14\x9dP\x95?E$Y\x1f,d\xeb?\xd9iO\xc6rU\xa3\xbf\xe1\xe67e\x8fW\xf0?aN\xbfX\xa5\xc1\xa2\xbf$V\xf5\xd5<A\xf0?\xb0\x1a*\xe3}9S\xbfuA\xf2\xcf\xaf\xe1\xee?g+\xd3\x8f\x06}o\xbf\x8d\xa7\xedu\x17\xfe\xed?\xaf$3dZ\x98\x8c\xbf8gh\xa4\x9e\xf7\xef?\x8d\xf1\x0e\xfd\x01N\xa4\xbfq\xbdy\x99\xe7\xfd\xf3?'
p63
tp64
bag2
(g3
(I0
tp65
g5
tp66
Rp67
(I1
(I2
I319
tp68
g12
I01
S'\xcf\xa4\xc0\xaeN\\\xb9?\x9d\xbe\x0e\xc6\xb3\xc0\xe3?"w#\x86&*\xb0\xbf\x0c\xa4\xffp\r4\xf0?\x92>S\x0e\x01\xa4\xa2?\xda\x96\xebL\xcfS\xec?\x87\xb7\x81 \xaab\xab\xbf\xac\n\xf6\xb5\x8a6\xed?\x03?#\xf3\x98\xf3\xc7?i3e3\xf5\xd7\xea?I\xac1\xbbg\xf1\xb9?<\xfd\xde^\xed\xe9\xe5?\xc5\xe1p5\xa1\xe8\x80?\x8c\x0e\x84\xf5Q\xe5\xec?Z\xc6\xe5\x9a\x8eR\xa8\xbf\x84\x1b\x90R%\t\xf2?\x99\x0cF\xe3\xf6\xbb\x9e\xbf\x16\xc6r$\x90\x9c\xf2?:\xc0\x1d\xd9\xa9\x94\xaf?=+\xf7\xe3\xeas\xe6?\xa7\xe6\x19\xb0g#\xa4?\xdf\x83\xc5\xe7\xe9\xb6\xea?\xe7Kt\x96lu\xaf\xbf\x83\x9bsV\xecR\xf1?v\x95F?\xf8\xd7\x9a?\xba\xf9\xdaxX9\xeb?\xcf\xfd\x077\x17\xbe\x8c?\xeb\x82 \x03e(\xef?\xc2C\x85\x8cf\x8a\x93\xbf\xa7-\x02\nK\xf6\xf0?\x8f\xd9m\xd7#\xe6\x94\xbf4;\xf9\x00\x03\xf2\xf0?\xb9\xa8\xbd5\x10\x03s\xbfXtZ\xc0\x12\x1f\xf0?\x8f\xcd\x05\xca\x083\xa0\xbf\x12\xb2\n\x80\x95\xd7\xee?\x89\x95\x1d(P\x89\xb4?\xcf\xc6\xf6\x0c\xceM\xed?\xc7/\x1f-\x9eb\xd0\xbf,\xc5\xc3\xea\xab\x1a\x00@\x1e\x14G\xaf\x05p\xab\xbft\xcc\x06\xf8\x1a\x01\xf2?\xc3\xa9\xdd_\xe7\xb0\xc3?SPh\xf2\x9e6\xec?\xf6F\xcd\xd4\xc3\xc2\x8f?o=d\xb7\x83\xcb\xef?==i_\xac\x8b\xb1?R\xa0\xe4\xac&\xb3\xee?-\x12/\xe1\xd36\xcc\xbfW\x15\xd7j\xb4\x1c\xfb?\xf0?\xccZ\xb4\xff\xd0?\xa6q\xd2\xc0|E\xe6?\xd1\x80C\xec!\x1d\xb4?\x1b)\xcf`I-\xee?e\x94[_\xe3+\xae\xbfWa\xd7\xd36\x97\xf2?\xe4\xb6\x00\xe4\x0e\xa0\x90\xbf\x96\xae\xb0\x89\xfb\xfe\xee?\xd8\xc2\x1bf\xd0\x9a\x94?`\xacn\x82C\xd9\xed?\\\xa6\xb7\xb4\xf7\x08\xbf\xbf\xc4cs(\x8aA\xf2?"\xf6I\xfd\xe5Z\x91\xbf\xbc\xbf\xc2\x94B\xf2\xf0?rL\xf72}^\xa2\xbf\xddf\xdeTPG\xf0?\xac\xf6\x00\xab\xb1\xe3\xa6?\xfd\xfd\xe2\x88+I\xeb?F!@`\xe3W\x9e?T)e\x9a\xe8Y\xed?\x9fN8\xf9`d\xa9?\xf0M\xf8\xe3=\xe2\xee?\x07\x99\xf3\xdb\x08G\xf8\xbf\xd7\x03w\x91\x08\x10\x1d@-b\xfa\xfb\xa3\xf6\xa5\xbf\xec#DKz\xc1\xf1?\x0c\x00\xee\xbd\x86@O?\x18a \x87\xd9!\xf1?3)\xcbj\x90>\xb6\xbf\xb9/\xd2f\xc1\r\xf1?\x9d\xe1\xd8\xca}\xb4\xa7?\x90\xf4g\xd1t;\xeb?\tw\x94\xc8d1\x90?*O3\x05%%\xee?\x8f@\xcb\xc7\xd1\xca\xb2\xbf\xd9\xd0\x151b\x1b\xf2?>\xbeyeO)b\xbfz\xab\xdfg\x8a\xb5\xef?p\xb3\x9a\x1d\xcf\xc8\x90\xbf.kYNg\x8a\xf3?\xfbX\x91KQ\xed\xb1\xbfQ~\xe1\x02\xc7\xac\xf3?\x06\x94)\xec\x1c\xff}?\x19\xc6\x8e|\xb3\xbc\xf1?Y\x19<\xa3\xcb\x95p?\xb0\xba\xab\xd9\xf7\xef\xef?\xdc\x93\x88t\xed~\xc3\xbfj\xab\xcdZu\xed\xf3?\x96\xa9H\x13\xcd\x05}?=\xa2X\xda\xbf+\xef?\xdb\xb9]\x0e\xd0c\xa8?Nd\xb8\x87\xd3i\xee?_\xd8%K\xfe>\xb8\xbf2A\x1e\xc3Ta\xf2?\x80:]\xfc?\xd5\xbf\xbf3s\x13Y\xdb\xbd\xf5?"o\x96\xa0\xfd\xd4z\xbf\x9b\xb6\xa8Ta\x1e\xf1??\xf9\xc5\xb1\xa7\xb0\xb5\xbf\xdbG[\r\xc7\x84\xf2?J=\xbay\x067\x9b\xbf\x1e\xa2\xc0:\x8eD\xf1?F\xf4\x05\xa2\xa9\x88\xc4?\x93\ts\x02?\xcc\xe6?\xe9Y\xa0\x1e\xc8\xcd\x96\xbf/?\xf6\x9d\xc1\xac\xef?pk\xa7\x83I\'|?g%\xed\x1f\x94J\xf0?qZ\xc0\xd1L\xa8\xa1?C\x92\x159e\xb0\xeb?d\xa7)\x8cy\x14\x82\xbf\x1a\xab\x02\xbf\x88\xf0\xf0?\n\x85\xce\x0e\x0e\x85\xb1?\x90\xcc\xf4+@\xa9\xe8?S2%\x92\xda8\xba?\xb0\'P\x9f\x8cA\xe6?\xa9yY\xd1`\'\x9e\xbf\xb88\xef\x00v.\xf2?\xcf\xbf\xc4}\x0c6u\xbf\xdb$=\xc9\\y\xf0?\xd8\'\xc8\xccZrp?\xfaV\x1c^\xddJ\xf1?\x01\xf1\x1ff\x89\xf6\xb0\xbf\x9e\x8e\x83I\x19\t\xf5?\xe6oM\xaf\xd2\x82\xdc?\xe3\x17\xb0z\ni\xed?\xdb\xc8\xd9\xc4\x0e\xab\xaa\xbf\xb1\x0f\x9b\xf4\x7f\x0b\xf1?\xad\x94\xb6\xf8U\xc1\xcb\xbf\xa6\xe9\xe8\xbf\xb2\x1e\xfb?\x07\x95v\x18\xa3\x08\x85?\xbaPR\xc6\x059\xf0?\x9c\xce\x9e\xc3Oe\xdb?\x1eh2\xeb&\xfb\xfb?\xfb>\x9aTk{\xad?@\xd2D\xab=\x9f\xf0?\xc6}|\x98\x0f\x89\xb0?\x80\xde\xf8z\xd2J\xec?\xaf]\xf1C\xf4\xe9\x87?v\xd2\x02\x1d\xee\xdd\xec?\x9f\x1c\xf7\\\xb1\xd4\x8c?M{\xc0\xfe\x8a\xe4\xef?\xbe\x83*\xac\xf3m\x87\xbf\xa5>\xe2\x86\xa4{\xf0?\xb8T\xff\x0cg\xd6\x9a\xbfj\xee\xe1J#\xb2\xed?m5}x\xcd\x91\xca\xbf|q!\x1a\xbc\xac\xf8?)k\rr\x7fk\x8a?%]\xec;\x1cx\xef?4\xfeRE\xa9y\xaf\xbf\xd1\x9cCq\x906\xf0?H\xd0\xd4\x8b\x04j\xcb\xbf\x19+a8\xe1\x08\xfc?\x8a|\x01\xbcyW\x9f\xbf\xdd\x88\xbb\xa6\x9d\x13\xf2?\xd9\xe3\x82\x19\xb6\x9c\xad?\xb7/\x80\xfa\xe8\xd1\xea?\xce\xd3\x8a\xbd|\xf2\xab?\xe6HX\xc3\x11\xb3\xf0?W\xa21\xe0\x03\xe0\xd1\xbf\xbf\x1e\x89~A\x86\xfa??v\x02\x17\xfe-\xab?\x96\x83\x15\xfbM\xd9\xea?\x06\x19\xc9\xbd\xf13\xb8?\x15\x1e]\x1a\xcb\x91\xeb?\xc1\x15\x18^U\xa9\xc0?\xe8BPD\x18\xa4\xe9?$\x84\xc9\x86\xfb\xeb\xb5?7u/\x04\x19K\xe8?\x1f\xe2\xc2\xfc\xed\xd2Q\xbfVR\xa1\xfc\xb19\xf0?4\xdf\x0ew>\xdb\xb0\xbf:\xd5dZ\xe4\x02\xf1?@\xea\xf1\xd0!\xbb\x9f\xbf\xf1Fe\x7f\xc2,\xf3?\xb1n_\n\xdfh\xc1?\xc2\x15\xfb\x84X\x98\xe2?\xe1\x11&#\xe3Y\x9c\xbf?\r\x12OE1\xef?X\x9a\xb4\xaa\rA\xa8?\xcdA\x82r\xb0\xc9\xee?\x11R^\xa4\xdd\xbc\x85?\xc9\xcaQ_JK\xf2?\xfc\xd4\xfd\xc8M\t\x96\xbfV[\xe4\x99\x10\xd6\xf1?m\xe9z4\xb9]\x87\xbf\xbcI\xc1]3)\xef?\xa5\xedh\x85\xe4w\xb3\xbf\xc7@\xa5\xd1A\xb7\xf3?\x96=\x94J\xf9\xda\x96\xbf\r^\xe5\x1cfL\xed?OHi\x08\xd8\x8e\xb8?@\xc8\x16\xb7\xdc~\xee?R\x80\x1d\x1d;V\xad?M\xc8\xe6\xcd\xac\x14\xeb?d\xa0\x92\xf2P\xcb\x9d\xbf\x0bX\x93/$#\xf4?\x87\x9d/j\xc5\x93\xc9?t\xea\x03\xf2\x15\xd0\xf3?x\xf2\xcd\xca^\xc3\xac?\xda\xeb~\x8e\xe3\xec\xec?\xc7eF\x00\xab\xf8\x99?\xe6\xb4\xf6>\xe7_\xf0?\xb1Z\xd7*\xb5\x13b\xbf\xed\x87\xc2\xee=\x01\xee?\xdao\x100\xfb]\xa5\xbf\x0b-\x8c6d\x96\xf0?\xa0\x17\x0f\xd9\xd5\x94\xb1?\t4RDP\xe8\xeb?h4\x8d\x8ca\xdf\xa3?\xd1-\xb5\n\x05\xcd\xec?T\x08\xb1\xcdl.\x80?G%\x86^\x93}\xee?\xf2kb/\tk\xba?\xc6\xd9(\xffp\xda\xf1?\x80\x0c\'\x9b\xe1\xad\x90\xbf\x9f\xb2\x9a\xd5ZU\xf0?6M\xc7\xe4\xcd\xa5\x93\xbfB\x89a+\xab\xb6\xf0?\x9f\xad%[\xad\x83\xc8?v\x12\xd1\x87\x915\xea?\r\xfd\xd3qS@\xb4\xbf\xaef\xe1\xd5\xd1\x8a\xf6?\xe8%\x179I\x18\xb1\xbf,m\xfav3\xce\xf2?9C\xeb\xd0\xce\x8a\x84?I\x9b5\xc6\xd1\xe7\xef?\xa3$37\xc4\xc2\x9b?e\xa4|\xed\x14\xc4\xee?\xfe\xa8\xca$J\x05\x9f\xbf}\xc5\xb7\x1eo\xb2\xf1?\xb9:\xf4`z\xd8\xe9?\xfd\x81[\xc8\t\x9d\xc1?-\x99l\x1eA}\xa1\xbf\xa8;\xd6`-u\xf2?\xe0;\xc0\x97\xb2K\x82\xbf\x0eP\xb8-Hf\xf0?\xee\r\xff\xbe\xc9\x04\xa2\xbf>F0\xe6\xffh\xf1?\x8cAL\xf8\x02sd?\x8b\x06\\X\xf2$\xf0?>sM\xe7\xee\xd0\x8c?\xe3\x01\xa8\xfd[L\xef? \'W[\xc5\xad\x8f\xbfi\n\xfa\x04\x83\xeb\xee?(4G\xc3\x91\xbc\xb9\xbf\xa8\xd8\x9dow\xc8\xf4?<\xe1\xcf)\xe6\xbft?#\xda\x90\xad\x0e\xa5\xee?V\x91LT\xb6\xa1\x9e?\xb8\xa2\xf4\xe4F\x19\xed?\x98\xd1\xa7\xb9ST\xa9?xb\xe5\xe6C\x1c\xf0?<IW\x05\xc6\x14\xb3?\xd2\xf6\xe5z#\x8a\xee?\xeat\x10\xfbk\xb0\x8c\xbfu0\xe2\xf6\xa4\'\xf0?\x86\xbe|\xb4\xb2\xd4z?C\xc7Y\xa8<\x9d\xed?\x0efcI\xbb\x7f\xb7?\xd3\x1b\xc1\xeb{\xc0\xe7?\xa3\xa1*IS#\x97\xbf\x85\xce\xed\x91-\xd7\xf1?\x1f\xf2\xfcD\x84\x95\xb3\xbf\xe0y=\\\xf6*\xf3?\x05\xc5\xc7ik\x8b\xe5?\xd9\x80\xe3\xe4~\t\xab\xbf\x8b\xac\xf4\x07\x01\xab\xbf\xbfHq\x17\xc7-\xcd\xf7?,\xfd\xc5\xec\x141\xa7\xbf\x11\xf8\x15zs\x0f\xf3?\xc4z\x90\xb0\xa56\x9a?6W=\x9f\xa9\xae\xed?\xac\x0e\x9b\x94\x08\x8a\xd2?`stsm\xe1\xeb?\x8e\x17_d\xf3\xae\xac\xbfZ\xc22\xc9\x9b\xa8\xf3?\x87/$!\x9a]\x95?\xfa\xfb\xbd\xa2\xabZ\xf0?L5\xa7\xc6\xda\xcf\xab\xbf\x94\xda\x81\xc1\xffG\xf0?\xe0\xf9\xc2\x10<\x90\xb9\xbf-\x18\xa9\xa2\x1fd\xf4?\xfa"\xad,\xa5}K\xbf\xfc\xf0-J]|\xed?\x8c\xbf\x1f\x8e\xb5\xf0\x85\xbf\xb7_3N\x0b\xc4\xf0?\x93\x8e\xe2\xab\x0c\xda\xa8?Ij\xfa#\x0c\xbf\xe9?\xbeH.\x9b\xd0\xb9\x90?x\xb1U\x9c\x96s\xef?\xaf\x11\xf9_4\n\x9d\xbf\xa9{F\xd1\x11\xee\xf0?h\x05D\x8cP\x02\xb2?f\xe9\'B\x07\xb2\xe6?1I\xb1$\xb4<k\xbf\xa1h%\x8d\xf4b\xf1?\xb3WSq\x16\xcfr?\xb1\xb3\xf2_r\xb1\xef?\x1a\x01\x016\x8b\xf2\xc8\xbf\xe4\xd1\xbd\x0e\xc7\x85\xfb?VL\n\xb7\xd5\xd9\x99\xbf\x13Ai\xc3\x8aW\xf2?\xfa{(\xe4n\xbe\x83?T&\xf3\x08\xe7u\xed?\x10\xd4\x033\x84\x81\xc8\xbf\xb9\xacTgC\x7f\xf5?\x1e\xc1s\xe3n\xd1\xc7?q\xa1\xb3\x8d\x12#\xea?*\x1a\x9b:!&\xac?\xc1\xa9:`*\x8b\xe8?$\x0b:\x8a\xcf\x15\x82?\x07q\x8c\xde\xe2,\xef?\x90\x8b"\xc3n\x8e\x91\xbf(P\x1c\xef\x1a\xd9\xee?\xbd\xad\xd8s\xf5J\xb6\xbf\x99\x1b\x05\x90\xdd\xb2\xf2?\xf7\x94\xc4\x92\xe1k\xb3?\xd5|I\xb0\xc9\xc1\xef?\xb8\x8f\xb1\xa4\x94\xaa\x9c?\xe37b\r~d\xee?\x01\xcf(\x8a\xe8\xd8\xa2\xbf\xe0\xc3\xc8W<J\xf2?\xe1>\xb2n\xc3\x07j?p\x1a\x91\xfe\x05\xc4\xf0?!\xfdN=\xfd\x1f\x84\xbf\x06,]}\x0f]\xf0?\x95\xaaI\xee\x14\xf1\x9b\xbf\xc4q\nUH\x06\xf1?\x99\xd3\xc12\xe2\xa7\xb2?\xdb\x98\xa5/\xa8T\xe9?\xdc\x1a\xf9\xe6\xc9\xb8\xad\xbf\xe4\x15X\xc6\xb5\x98\xf2?4\xaa\x96\x05\xdb\xd9\x9a?H\xbeP\xc2\x95\xdb\xe9?>\xd7<O\xa1$\xf0?\x87\x15\xc4\x85\xf5\xa2\xe1?Fm\x14Y:\x9e\xc3?^&g\xc5fd\xef?\r7^\xcb\x15\x12\x95\xbf; |\xf0\xdd\x86\xf0?$\xe7\xe6*\x0cy\xb1?\xb6\x9d\n\x87\x83\xa7\xef?\xd6\x02\xbbp\xdb\xde\xa2\xbf\xaa\xcd\xda\xd3\xbf\xbc\xf0?G\x0cdx\x1f]`\xbfA\xb4n@\xcc,\xf0?C\xe3\xa9t\t\xd1\x9f\xbf\xd9%\x89\x91\r\x8f\xf4?\x9c\xbeMm\xb7\x90\x96?\xa5\xcc\x84\xd2\xa6\xab\xef?\x83\x93I\x12\xc1\xd7\xb3?\x00\x8a\xf5s^\x97\xe8?\x0cD94T\xf6\xab\xbf9\xebP\x92\xf4[\xf1?\xbb\xfez\x8dC\xa4\xa5?r\xda\xa9R\xe6\x99\xed?)\x17/\x1cS\xca\xb7\xbf\x17=\x12\xefD\x7f\xf4?l\xa8\x80\xf8WV\xa5?\xd6\xfa\xcf\x8b\'\xbf\xec?\x17\x86\xba/\xa7\xe7\xa6\xbf[\x03S[\x92\xbf\xf2?\x88\xf4\xc6\xbc\x82\x9e\xbd?\xeeM\xb3\xb0Q\x8b\xe7?&\x8d\x151-\xba\x80\xbf\xabg\xbb\xeaJV\xf1?r\x0c\x96*\x0e>\xba?\xa3q\xa3\x1e\xbc\x9b\xec?[\xe3\x90a\x08]\xb9?\xc4\xd3\xdeQM\xdb\xe7?\x00e#I\xfdD\\\xbf\x15\xd5\x14\xce\xa5\xe5\xf1?\x1f\xfd\xa8\x82\xc3\xbf\xa9\xbf\xf2\xc3S\xab\xe0\x85\xf2?*\xc4\x96\xd03Y\xac?x\xc8Z\xb0@\xd0\xeb?\x8e\x15\x93\x99\x0cg\xc5\xbf\xdfq\xd3B9v\xf2?.t\x9a\xba3x\x83\xbf\xa3\xe2;#\x81\x8d\xf1?U\xba\xb3E\xe6]\xb0\xbf\xdeI\xa9\xed\xb5\x83\xf3?\xf3\xce>\xbc\xbc!\x93?z\xb8\xb9\xbf\xa6\xc2\xed?\xf2\xa0jO\x10\xc9\xc8?\xb3\xf2\xd9y\xa2\xa6\xe5?\xbfYC\xc2@\xf9\xd8?@\xe66\x96\xae\x0b\xe7?Z\n\x90]\xc4\xdfp?\x9d\x8d\x02\x1d;[\xef?i\x13\x86\xee\xee\xbb\x8d\xbf\x03\x01\x9d\xf0\x01D\xef?\x82)\xb4(g\n\x91?z#$\xbc\xd9\x8e\xed?\xaa\xb3Q\xb6|\x87\xcc\xbf\xa6\xf3\x12\xe6qY\xf6?a. W\xa36\xba\xbf\xdd\xe9u\xe5\xa8y\xf4?\x1eRr\t\x19z\xbe?F%\xea\x1dC\xb6\xee?\xe6\xe9\xe3\xfa\xa7g\xab\xbf\x83\x8a@<\xb0\xc4\xf1?C\x91w\xb5\xe47\xaf?S\x1dG+\xab\xa5\xed?\xbf\xe0\xa6\x82\xb2\xd9\xae\xbf$\x89\xf3\xdc\xa2*\xf1?\xc5\x10\xe41iC\xcf?\x87\xe2\xeaU\x93\xf3\xdd?\x08\x95\x07\xf0(\x0f\x8f?\x08\xa1\xc9\xe8Dj\xf0?\xc3)\xa4N\xd0]\x8d\xbf\xa9%\x18\xe1f\xa6\xee?\x05\x0c\xd3t\xf3\x82\x97\xbf\x07\x93\x1d\xa2Tb\xeb?B\t\xcd\xc8\xf7\xdd\x87\xbf\'\xa8\xbe\x12\xee\x12\xef?>\xc2?|\x8e\xed\x96?o\x18\xa9\x1a\x1f\x1e\xee?_\x9a\xea\xa6E7\xdf?`_\x82q=\x89\xe6?4\xa9\x80\xae\x13`\xa3\xbf\xab\xe1\xcbf\rL\xf0?\xa5\x98\x14\xb8\x99\xb0\xb1\xbf6\xaf\x86\xc5D\x96\xf1?\xeb\xe8Z\xba\xdd\xe1\xab?\x83\xf5n\x10I\x82\xe5?\x974\xae\xbe(`\x95?\x812\xe36\'u\xef?\x13\xf2\xeb\xc8e|\xb4?*\xcb\xc0%\xd2z\xed?\xa6\xb6\xee^\xa6\r\x92?XX\xc8mes\xec?\xf7\xe2\xce\x02\xcd\xae\x98\xbf\x18\xf1i\xb5\x0c4\xee?\xe8\xe6Cf/%7?R\xc3]\x9fwl\xf1? \xe0]%\x15t\xc4?O+\x97\x8e\x01\xb5\xec?\n\xa6A:\xf12\x93\xbf\xf5\x13\x8fo\xbco\xf1?w\x00\xc1\x1c\xed\x89\xbf?\xd4AvO\x12\xeb\xe2?-\xd8\x12\xc5\x1cl\xa4?^\x0b\xb0\xca\xb1\x13\xf0?@9\xed\xa5\x91"\xc8?\xea<K\x9d(\xf3\xec?\xc3\xe7\x9e\xd1\r\x14\x8e??\x9a\xc8w\x00?\xf0?\xc4\xddK\xc7q\x1d\x88?E\x13v\xef\xc4\xd1\xeb?\xec \xde\xd1+\xd4\xa6\xbf\xefC\xdd6\x896\xf0?+\xf7\xe2\xa3\xa3Kr?C\xb8\x95\xb8\xb16\xf0?\xbc\x99&\x9a\x8c\xc4\x96\xbfP\x82\xdf\x16\x94V\xf1?u\x97S\xdd\\\xcd\x7f?\xc4\xcf7Xj*\xed?J\xea\xea\x1c\x9a\tw?^\xa4k\xed\'\x82\xec?\x18\xf1\xc6b\x1f/\xb7?\xad\xfe@\xc6\xe7\x10\xef?\xbd\x86\x1f\x9c\xa7C\xb1?hH\xc0\xfa\xac\xec\xe7?\xe4\x82\xf6\x19k\xf4\xb2?\xa0\r\xbc\rv\xf3\xeb?X}\x8e`E3\xaa\xbf\xa5\xc9s\xf9\x07q\xf2?\xacc\xf6y\x9c#\xb0\xbf<\xcd\xb7R\xba\xb5\xf0?\xfe)\xcd\x1d<\xa9\x90\xbf\xa00f\xae"\xb1\xee?\xfc\xb2\x1d\xe3#\xc9R\xbf\x0b\xe9\xa5~\xba\xa5\xee?\xc8{=\x08V&\xa7?f\x01\xc2\x9e\x8e\xe3\xef?\xf4\xa65%\xd2\x11\xce?\x1cJ\x18\n\xb2\xf0\xf1?\xa7T\xbe\xd5U\xe8f?\xd4\xd3\'\xc4\xd9\xa7\xee?\xe4\x15\xdbp\xeb"\x9f?^\xeb\x15\xbaPU\xf1?\x84\x9e\x98*#\x14\xc4?\r\x88\x05\x9b\x19\xe3\xf0?\x07\xc8\t\xc0\xf7\xdb\xa8\xbf\xd7)\x89\x95\xf5\t\xf2?`Y\xe6\x90#\x04\xbd\xbf3\xc9\x9e\x9a5\xd4\xf2?\x1c\xed\x94\xb7\'\xc6\x9f\xbf\'\xd0\xa0\x15\x8e\x8c\xf0?TKT+\xc29\xdf?\xb9\xdf\xa4*\xcd\xc2\xd3?;:\x10\x1eN,\xbc?K\xb3Q5:3\xe7?2\xff4\xfaU2h\xbf6V\xfa7J\xf2\xef?q\xb6\x1d\xe1\xc4\xc9\xda?7@\xa0\xcbA\xfd\xee?H\x025\x1a;v\x8a\xbf\xe4Pdz\'>\xf1?\x1bl79!\xe3~?\xcb\xa2Q[>`\xf0?\x17\xf9\xe2\xcb\xf1\x97\xa3?6BIx\xb4=\xec?\xaa\xcc3\xa7\xc7\x05\xc0?\x81\x1cD\x10zd\xe9?\xeaE\xc6\x1a\x03\x98\xb0\xbf\xb0\xad\xdef\xc6o\xf2?A\xfd\tt\x13\x1e\xb4\xbfJ\xa8V\x13|@\xee?\x93\xe0\xfb\x17\xdf\xf6\xa7?R\x1dM\x9f"\xe4\xea?\xfbZ\xca\x98\x9e8\xa1?\'~\x82\xd7\xabS\xf0?\x9c\xc2\x81\x8e\xd6K\xa7?\x1e\r\xc1u\xd4\x01\xe9?\xbc\xda\x93\xb4\'Y\x88?\xf7\xd97\xd7"Y\xee?/qr\x16m\x81\xa9\xbfj\x84\x9a\xb5\xcc\x01\xf2?i\xcd\xa1\xf3\x82\x94\x88\xbf\x83v\xbb\xf0\x104\xf1?a/\xeb\xb5\x8c\xe7\xb5?\xf6\xecm\xc7\x0c\xf9\xf0?B\xda=\xaa\x97V\xa9?\xbc9\x98\xbf\x18X\xeb?\xb2<\x13\x80\xb2J\x99?\xf7Z7\xb4\xf1\xe5\xed?y\xd67\xf2\xfd\xb6\xa7?\x84&\xa6\x8e\xcb\xc5\xed?\xe4\x02\xad\x0c\xe1\xa5\xc3\xbf\xdd\xf2\xb17\xf2\xb7\xf6?k\xfe\xc3\x0c\xc2\xef\xb6\xbf+\xec\x98\xcaL3\xf7?\xe8\xa75\xb7g\xd4\x9a\xbf5{\xb6\xa4C\x8b\xf2?5\xd3\xb6U\x86 \xae\xbf-\xeb>\xa5\xe3\xf1\xf0?A\x87\xfd\xb9\xca\x91\x90?!\x0c\xc2\x10p\'\xee?[ xUu\x8c\x90?rr(\xafG\x87\xed?\xd9L\xefQ\xb9T\xba\xbfg8\x1ddk\x06\xf4?\xa3\xea\xb7\xc6\xb3\x95\xb3?\x02\xcd\x02\'X\xcd\xee?!\xc2:yf\xf8\x85?Sp\xc5X\xba5\xeb?f\xbf\xc87\x16xj?\xa7\xf6\xcdZ\xdf\xf7\xee?83\xc1\xfe8\xc0\x85\xbf3tR\x11\xabd\xf0?F.R\xb0)\xb7\xa0?\x05\xdb\xc1\xbe\xad\xf9\xec?\xfe\x8e\x1e0\t5\x82?\x06\xcbs\xcdM\xfa\xed?\xdc\xa4\x9fI\x8aM\x93\xbf\xa1\x14m{j\x88\xf0?p\x8e\x19\x950\xdf\x9f\xbf\xbeI\xc1\xb960\xf0?\xaazHP\xde\xc3\xc0\xbfK.\n`\x05\x9c\xf1?\x1bve\x9c\xc4\x80u\xbf\xd6!R\xa5f\xa2\xf0?\xb6<\xb2B~r\xb5?\xb8\x90=n\x1a\xfa\xeb?\x02`/\x1f,\xbf\xc3\xbf\x9f|\xf3\x07kQ\xf6?k}\xfea%\xd7\xb0?\xe0G\xaa\n\xa3L\xec?\x9b\xdc_iqSJ\xbf\xee\x93\xb9b\\\xd5\xef?\x12\xcb\x87\xa2\xc3Z\x9a?-U;\xc5j\x1c\xf0?dn\xacRT:\x91?\x99\xf9t\xec3\xeb\xef?J\x9f\'FTi\xb2?\xd2}\xcb^\xff&\xf0?$\xff\xc2\x8a\x93\xff\xb1?F\x12\xd6AG\x8c\xea?`S\x07\x88\xecs\xaa?\xe6I\xeb\xd4\xcaE\xef?\xcf\x0c\xba\x16\xf2\r{?\xc1BT\xe7M\xc6\xee?"\xbbmZ9bA\xbf\xae\x0e\xa1\xec9\xce\xee?\x0c\x82\xfa\x135\xa0\xb5\xbf\'\x94\xbe\xc1\xd6\xde\xf0?\x14\xbc^\xcb3\x11\x93?\x1c#\xd8G\xc8[\xf0?!#_\xe0\x1b\x18z\xbf\xe15\xdf\x0f}\x07\xef?v\x9d\r\x1e\xff\xf0\xac?p \xbf\x84\x19\x89\xec?\xd6\xce\xcc\xfd\xf1\xc0??\xe7_\x1e\xe32\x0f\xef?\\\x89\xc4\x84"\xc9\xaa\xbf\xd6\xac\n\x9b\x80\xfa\xed?mf\xf8{\xfa\xcd\xc7\xbf\x0f]\x15\xedlY\xf9?\x89\xc74v\xac\x00\xad\xbfUW7\xb4T\xc9\xf2?m\xb7\xad\x05,\xd9\xb5?^\x80\x12\xf2\x11\xe5\xec?\x0b\x0b%\xcc\xa2\xcc\xb2?\xf0!\xc4Tf\x0b\xeb?\xe5\xbd\xd9\xff\xdc,\x99?M\xea\x81w\xf3\x12\xee?\xb3\x0eGD<\x14\xaa?$\x16J=TZ\xed?\xdcZ\xb2\x05\x7f\x03V?\x05\xb7r\x0e\xfc\xec\xed?\xedC\x1b\xcff\t\x9e?\x9bBT\xc1\xd1M\xec?\xd5\x85c0\x14\xda\xc7?\xbd\xfb\xd7\xdaF\xa0\xef?\xc2\x90l\xad\x92,\x94\xbf\xa8Rb\xe5\xee5\xf0?:\xb6\xdb-\x10\xa2\xae?\xf3f\x87Qgg\xea?\x83\xf7\x12\xeb\xb4\x14\xc5\xbfX\xda#~\xe9V\xf5?\xa6\xc5\xda\x95E\xad\xa6\xbf\xb1y4\xc3\xe86\xf2?5\xcaO\x01U1\xbf\xbf\x81\xfc\xaed\xa8\xa3\xfc?'
p69
tp70
bag2
(g3
(I0
tp71
g5
tp72
Rp73
(I1
(I2
I357
tp74
g12
I01
S'aK\x82\x90c\xc8\x90?\x0c]\x86\x1bO\x9d\xee?\x18\x82\x8e\xbcs\xa5\x91\xbf\xb7Z\x18+5$\xf0?\x8ec\x1d^\x81\xb9\xb2\xbf\x90\xba\xa6\xc94\x85\xf1?\x9e\x10uS\x15\xb7\x8a\xbf\x07\xaf[G\x83\xba\xef?\x0c\xddS\xf8\xd2K\xa4?\xdd@\xac\xb5\xb3\x86\xec?s\x0b\xdcS\xdd\x11\x90?\xb1\x93\xb8-\x93\xf9\xef?g\x16\x8c\x90\xb9m\xb0?\xb7IC\xa2\xa2\x8e\xeb?}\xf7I\xe3\x96\x86\xb5\xbf\x1b2|BG\x8c\xf0?\xc6\x06\n\xa8<\xeb\x93?\x07\x0e\x7f\xbb\xaf\xdc\xf0?\xbf\xa1\xf5\xa6l7\xac\xbfz\xcf\xbfw-X\xf4?\x95\x12\x80`}\x07\x9a?q"\x9e\xc01\x9d\xe9?;\rr\xec\xdb\xeb\xb5?\x82\xd2zs%J\xea?\x879P\xa3\xe41y\xbf\x02\x96+7\xa4e\xee?}\xf4f\xceU%\xa8\xbf\x92+7\xbb\xc5\\\xf0?\xc6s\x87S\x112\x86?\xde\xe4Tu\xb5\x14\xef?l\xb5\xa2\x1d\x98\x00\x91\xbf\xf2\x1e\xe5\xf4\xce\x99\xf1?^\xb5-\xc9?%\xb6?D\xaeB\x85\r`\xe6?1\x04\xd6\xf9\x1e\xb0X\xbf\xb4=o\x12k\x94\xef?\xbea\x91+^\xf1\x86?\r\x04\x91\xfe\x87\xb2\xed?o\xccT\x99\xb7\xc6\xa3\xbf\xaa2\x14}u\xda\xf6?|\xa5VD\xc7\xd4\xd0??&X\xa1\xb3\xda\xe8?N.\x92\xb6\xb8\xc8\x84?2-\x19\xb9\xee\xcb\xf0?e:\xdd\x95+\xaa\x80\xbf%\xbc\x12\x01\xed\xa6\xf0?\xe4xtD\xd5}\x9e?\xd7\xa6U\x8d\xf9\xf1\xee?>\xc1\x863\xf6R\xa1\xbf\x8d\xc9|Uc\xc6\xf0?Q\xea|\x8d\x9c\t\xc8\xbf\x83\xbc\x96\x9e\xae\xae\xf9?\x8c\xe9\x82\xff\xef"\x84\xbf\xacf\xc9\xae\xbd"\xf0?\xac\xf9\xc4 \xf1n\xd0?\xcb\xc2\x17\xe8\xe5R\xed?\xb0u\xf8\x97\xac\xf0\xb1?\xc7\xfdL\xd5F\xfe\xe6?\x96\x0eM\x15\xd3^\xa9?\x82\x97a\xb0bJ\xed?\xa7\xdb \x16\xc7\xc7\x86\xbf^\xd8\xa5r(#\xf0?JYf\xdfV\x8e\xd7?\x849\x1bl\xddg\xed?\xd5\x86\xac)\xac\xc5\x9e?\xd2q#U\xf8S\xec?O\x8e\xd3\x9e\xf4\xf1\xb7?\x88K\xda_\x13-\xec?\x867\x07\xbe\r\xc7\xbd?@&*^)\x19\xea?\xc2]:\x83+\xe8\xad\xbf\x1a\x18\xccyp\x9f\xf5?H\x89\x8fV~m\x87\xbfm\xbf>\xafVn\xf6?\xd8\x9bgnd\x9c\x95?\xc2\x80H\xddg/\xef?\x8dg\x11\xda\xbd`\xa1?\x9c\xef\xeaf\xd6u\xef?&\xd4\xe7:\x92G\x88?\xd3\x10\xf9A\xc7I\xed?0\x90\x98\xc0\x9b\x1d\xc4?F\xf0#\x82\x17\x7f\xe0?H\x7f2\xc4\xe2\xf0\xb8\xbf4Ra}\xc8\'\xf1?B\x13c\xc9\xf6t\x9f\xbf8\n\xf2\x8aQj\xf1?M\xa8Gxh(\x98\xbfCo\xee\xbeq<\xf1?\xe2\xac<\xa4\x10>\x80?\x0fi\xa5F\xeau\xee?\xdc\x0c\xbf%\xb5&\x8c?R\x95\xd0#\x1e\x06\xf1?J\x16\xa5\xaa.\x9b\xcc\xbf\xc5\x9f\x00\x17,[\xf8?&\xf4s=\x82\xcd\x92\xbf\xf6i\x15u\xa0\xbb\xf0?\xa1z\xb7J.\x13\x86?\xe1r\xdc\xfb\x1f4\xee?\xec\xd5\x95\x80\x02\x1c\xa0\xbf\xb7:\xc1\x9cyj\xf1?\xe3\x8b\x14\xdf\xec_\x83\xbf\xcf\x0b\xbcj\x9cg\xef?\x1d\x02\x88\xd6\xb5\x95\x92\xbf\x92W^\xa94h\xf1?\xd1Z\x96FC\x10\xc5?\xd1g\x1b;\t\x85\xfb?\x91\xd3\x02i\xae\xd7\x88\xbf\x0f>{%\x91-\xee?J|d"\x06Y\x9f?i\x98\xdcA\xeb\xe7\xeb?p{\r\x02}d\xb8?5\x01\x0fT;\xc7\xe6?00\xdf\xa2\xbb\xfc\x9a?\x13~\x0e\xddj\xe7\xed?\xcf\xddJ\xc1\x81\x19\xad\xbf\xc6s\xde\t{\x95\xf0?1\x9b\xf0i\x15\x90Z\xbf\x1a\x0cRZ\xa5B\xf1?\xc8\x16\t\x8c\xfd\xa0\xb9\xbf\x15\xe5\xae\xb1iV\xf2?\x05\x0b\xf7s^+x?\xdbq\x94q\xaa\xb6\xef?\xea\x89\x17\xa2iD\x9f?\xcc\x95\xff\x02*\xf5\xeb?|\xc9\xb2\xbdc\x93\x94?\xa3\xb9/n\x10\x9f\xef?\xdfLhha%\xa5\xbf\'\xd0\xacUv\n\xf3?n\xddg\x05\x01\xb9\x8b\xbfI\x19\xa0%3{\xea?\xb6\x96\x958\n\xb7\x82?\xdf\xd5n\xb7W\x04\xf0?P,>\x93\xbc+\xb8\xbf\xe17\xd1\xbe\xb1\xfe\xf3?\x8b\x88[\xc2\xee\xf7\xa9?\tk36\x99\xb1\xea?(\xd7\xe7\xac_\x91\x81?k\x89\x90\x83\x05\xea\xed?\x02\xd8\x1d]\xab\xce_\xbf6t\x9d\x94\xcb\x1b\xee?4\xee#u\xc8\xaa\x86?\xe4\xd9;n&\xce\xf0?\xb7\xd0\xa7\xacO\xe4\xb5\xbf\x12@\xf0\xdc](\xf1?b\x05;\xa2N\x95\xc0?y\xb4\x9f%c\x8a\xea?QtI\x88\xd9\x07x\xbf}\x8b\x98\xf046\xf2?a\xf4E"P\xf6\xa9\xbf\xbd73}\x93\xfb\xf6?\xe2\xd4\xec\x8c|\xad\x94?\xc2\xc1O\x1e6\x91\xf0?!%\xa8F9\xab\xb7?8\x0b\xbd\xeb\xbbR\xe6?\xba\xca\xb9\xe2]\xa8\xb3\xbf\xf6t\xdc\xb7J@\xf3?\xda\xabDlp\xf6\x9d?\xbb\xdc\xab\x17z\xcf\xee?c\xe6\x91\xca\xfdp/?v\xbc\x12\x81\x1e\x13\xf2?DL\x8e\x19\xbcA\xc7\xbf\xdc\x8e\x11\xe7\x15\x1a\xf3?I\x8cQ5\x1d\x8f\xd1?H\x08n\x87\xda)\xf8?2\xb5\x0b\xa3\x1ao\x7f?}\x06)W\xe7m\xeb?g\xa6\xff.\x96t\xb4?m\x0e\x84WW|\xeb?\xe6\x8dZ\xd8^\x9e\xcd?p(\xf1\x83~\xb9\xef?\xc1\xfe\x08\xd5\xf8\xf5\xa3?e\x17U\xf5\xd4\xfa\xec?$\xb5\x05\x82\xb5+\xbb?\xaf\xd0 \x9c\xb80\xf0?h\xa8\x8b\x1f\xfb\xb3\x9f?\xa9\xef\x9d#\xa9\xd2\xe6?\x8a\x8d\xf9-Z\xa0\xc3\xbf\xaa\xd5\n?U\xde\xf4?\xf3\xe7\xf9\xe5\xad$\xb8?\xd4\xa1\xf7\x10\xab(\xe4?\xea\x14\xa9\xa1\xe3\x05\xae?d\x8fX\xf69\xba\xf4?\x02\xf6^\x12\x9a6\xc1?\x80\xc7\xcf2\xbb\x12\xde?\x08\x18\xca\xfd\x96\x90\x97?%\xe4l7\x01\x18\xec?U\x17\xd8\xecUa(?\xaec\x1d\xcc\x99\xb2\xee?f\xe3\r\xc1a\x9e\x84\xbf\x91\x9e,9\xa4\x16\xf2?8v\xa34\xdf \xb1?S\xa5\xac/\x0e&\xeb?UF\x08\xe3s\xc4\xa2\xbf~|Y\x82\x91T\xef?\xd1\xa1\xab\x0fb|\x87\xbf\xb1)\x02\xd9"]\xef?|vr%\x85\xb5\x80\xbf3\xbcDQ\xa9b\xf0?c\xe4S\xd0\x96\x7fY?Fh\xcd\xf2^\'\xf3?\xaa\x9e4Q-\xc4\xd8?\x98=\xcb:\x98\xd1\xe4?l\x99L8\x13}\x8f?B)\xd6\xc2\xd8\xb9\xed?\x1e\xbb\xf8u4\xf1\x96?_\x11\xa9Z\xe2\xdc\xea?%\xa0\xe6g\x05\x86\x96?\'\x08\xbb;\xc7\xa0\xed?\x15\x8e4g?\x1b\xa0\xbf\xeb\xd8^\xc6\x04\xdc\xf0?\xdfaW\x9d\x95\x04\x8c?\xf1V\xbb&\xd3\x91\xf0?\xf0z\xa9\xcbw\xc4\xb3?\xa7\xa1>yJ@\xe8?1\xdc\xbd\t\x9d\xbb\xb5\xbf\x881\xd0\x074\x87\xf2?\xb5|;\x89\x07A\xb7?\x7f\x08+\xf0;\xba\xe5?\xe6\xc7&\x82!"\x99?\x8f\xdb\xd2\xcd\xfdM\xef?\x9eZG\xf9\xf8\xf9\x9f?M\xd90\x9e{\xbf\xee?\xa1\x170B\xb5\x7f\xbe?\xcc);\xb7\xe8\x9a\xec?3\x8f_\x9d\x9aA\xb0?\xf8p\xae\xc3A\x08\xea?zka\x96\x07\xa3}?\x9e\xca&i\x08\xdb\xec?*\x14\xc6\xe8O\xa0\xb6\xbf\x11Ya\x8e\xc5\xee\xf2?\x96\xa6\xb9\xc2\x92\xb0\x8c\xbfH\xb3,\xcch;\xf2?\x99\ni\x12\xa7\x8d\x9f?\xa0\x8f<\xd5\x89\xcd\xee?\xc2\x8d\xd3\xf53k\xc2?\x91\xd7\x1cx\x18m\xe6?u\x8d}U\xb90\x99\xbf\xa3\xcbz\xc6\x14\x00\xf0?GS\xe8\xab\x88\xbd\xa1\xbf\'\x0b\xe1F$\xa9\xef?\xc4\xf2\x89cU\xa0\xb0\xbf:\x9a\xce\xb5\xe9r\xf3?\xa2:\xd2\xc0\x87\x9e\xc0\xbf\x83O\xdf\xde\xaaE\xf1?r\xd7J\xa4\x1c<\xa4\xbf\xc9\xea\xbe\x03fL\xf1?k\xf7">\xa8\xcc\x9f?\x04\re\r^\x12\xee?\x81^|\xdd\x80\xd9\xad?z\xec\xde\xce\x1a\xa0\xed?\xdc\xfc\xea\xc7}O\xa7\xbf\xa7g\x8f\x9e+\xda\xef?\xea|\x8bF?-\xb3\xbfG\x15d\x94)B\xf5?t,\xaa\xbbk\x83\xbc\xbf14`\x80\xc4^\xf2?_^w\xb4\xc8\x0e}\xbf\xda\xfb*\xabu\x1d\xec?\xfa\xb2\xc4\x9b\t\xd6\x92?$R\xb2\x14\x81\xd3\xee?\xde\xf9\xeafn\xfe\xaa?G*\x1e\xb9\x12}\xef?\xbf\xf9\xd2\xa55\x18\xa4\xbf\x18\x87-P\xcd\xaa\xee?\x07\x81\xdb\xc8\xd8\r\xb1?D\x13G\xe4q\x96\xf3?w\xfa\x8e9N\x94\x90\xbf\r.F\xc7\x89F\xea?\xc4o3\xf1\xcd\xac\xa9\xbf\xb5*\x81\x99\x04\x82\xf4?\xb8\xac\x91\x04\x00E\xb6?\x9a\xd6&\x88\x1co\xf0?\xec\xcb\xe8\xd3^\xbe\xbf?\xbc\xdaj{\xc7\x8d\xe4?6\xc5\xbbk\xa2}\xb4\xbf\x0f*\xc0\x9c\xe5\xf1\xf4?p\xf0\\\x16\x82E\xa0\xbfu6\xf1\'\x86\x82\xf0?\xc7\xc1\xc7g\x9cG\xba?\x92,\xc8f\x91\xed\xe8?y=toh\xbe\xc5\xbf\xe3\x92y\xc1\xe5S\xf1?\xdfLQ\tO>\xa1?\xfbv\xa5\x01\xd5\x18\xed?(\xbbh\xbc\xf0\xa7\x8a\xbf\xca{\x887>\t\xf0?\xe9\x0f\x9ao\xef\xa8z\xbf\xf0\xa2)#\x8bv\xee?B\xf2\x0c.\x81\x0f\xad?^\xca\xd1/\xea\xf0\xe8?U\x08K\x1cv\x96\xce?\xbb\r\xa5?\xce\xf6\xe7?\xbb\x8f\xcaA\x84\x9b\xb3?\xc1.\xf1\xff\xb9Y\xe9?\xbaqxl02v\xbf\xd77\xeb+\xd2w\xf0?\x1a\xb9t&\x1f4\x9e\xbf\x84\xd1\x8e\xb8\x83\\\xee?Yp.t9\\\x96\xbf\x1d\x7fEcE\xb8\xf0?\xa5!\x97\xae\xcc\xf4w\xbf\xfb\x11\xef~\xd6\xcd\xed?\x16\x00HB\xdd\xf7\xc8?\xc5\x05\x9b\x9e1,\xe6?\xb8f\xc3&\x05\x87\xc0\xbf\xbd\xc7\xd7\xee~\xad\xf6?`L\x99&\x10\xe4\xbc?\xd4\xda\xdc\xb3\xc7\xce\xed?\x9f\xcf\xa7Rz[\x82\xbf8\xfa\x8d\x1d\xf2\xad\xf0?\xc8w\x02\xe2D\x9b\xc8\xbf\xe3fL*\xc4p\xfa?N\xf0-\xe5k\xe8\xa7\xbf\xc6\x1dS\xea5\xa1\xf2?\xa1}\xfe\xed;I\xae\xbf\x90\x7f\x82\xeb\xba\'\xf0?\x94\x8e-G\xb9\xbb\x97\xbf\x9bo\x84,\xb5\x1c\xf0?\x10\xd7\x8bF\x0c\x0fm?\x82>\x8ao\xaf\x07\xf0?\xa9\x0f\x83\xc9\xc2\xf9\x91?6\xc3\xe0\xc2>\x19\xee?\xca\x93\xf2\xa8\xe6b\xc6\xbf\xe4\xd6\xf7\xe8\xdc\xd6\xf8?\xb2\xa9(P\t\x88\xc1?\x18\xf7W\xb9\x14\xd1\xec?\x96\xfb\xaeH\xbf\xb8\xb8?w\xf2\xba\xb0\xf4\xe2\xef?\xa5\x0c\xc4oZ\x93\x91\xbf\xd8\xe4O\xac\xc7_\xee?\x88\r\xf1\xf1\x87\xfb\xa9?\x0bO\x84\xcd\x16\x9a\xf1?w\xf3\x96\xe7\xd2\xc0\x8a?5\xf0\xc8\x9f\x9d\x15\xef?\x1f\x92\xaf\xba\x1c\xf4\xa6?\xf3lv\x9cN\x1c\xee?\x0f\x99\x99e*1\x9d?T\x96\x0b%}\xfb\xec?(\xf0[\x93\x91\xbff?\xe9i;(\x07\xe3\xef?\x0fe=\x99LY\xaf\xbf\xc7\xdd\x82\xc0\x80U\xf2?\xa1qV\x9dTN\x83\xbf\x08\x8f\x8c\x9c\xcf\xa6\xec?\xd5\x91|\x83[^\xba?rRso\xd9\xe7\xee?\x93^k\xfd\t\xe0:\xbfk[\x97\xcf.\xcd\xef?\xa2\xb2\xd4x\xcfb\xb0?g\xa8K\xde\xc2%\xf0?\xc9\x93\xb8Y\xb2:\xa2?\xa9\xc8\xe2~\x8f*\xed?\x94\x8c\x84<!\xbc\xa5?\x1e\xbd\x99\x1cL\xd1\xec?fd)\xec\x8c\xa1\xa2?\x991\x8b+\xf7\xb5\xea?\x7f\x96\xbdj\xc9\xeb\xb8\xbf\xf7\x1d:h\\g\xf1? \x85F}\x8edw?o\x08\xd35\x0e7\xee?\xc7u\x802\xf9\x08\xbb?\xe9\\\x98x\x1e\xaf\xdc?-h\xb6\x80>\xb5\x8e\xbf\xb0\xa7=\xf0\x85C\xf0?K^PxKp\xc7\xbfo2\x9c\xa4\xe4\x05\xf7?@:\xf7\x9aDL\xd9?\xa1\xbb\xc5\x15\xb6I\xe4?\xaeU&\xe8k\x1e\xda\xbf\x82\xe4,\xb7\x95\x8d\xff?SI|p\x982\xa0\xbf5\x1ce\xcb\x14\xde\xf0?\xd6\x9b\xce\xba\x95\xf9\xaa\xbf\xac\xff\xf2\xa8RO\xed?S\xc2"\xc6{\xa8\xaa?\x97\xe8\x8b\xadwI\xe6?_\xc5\xd6\xb1\xbe\xc2\xc4?\xb3\xbcu((7\xeb?Q\xc1R\xd2>Xu?"\xceT\xf9$\xc1\xee?U\x1a9\x1e/\xc7\xb2\xbf\x96\xd2\xedx\x13\x8d\xf0?T\xf6dU\x9d\x04\xaf\xbf%\xfd\xed\x0b\xbf9\xf4?\xfa\xdfM\x10}\xc1\xb4\xbfJt\xd1\xf3![\xf0?\xb2\xf2Q\x89\x8a\xe9\x84?\xfa\xfc\x8cI3T\xf6?k\x95@\x1f-\x0b\xb0?\xdap\xfa\x87|W\xe7?\xbf\xae\x9bq5\xd0\xa5\xbf\x0235\xe9\xb9\xd1\xf1?$\x9e\r\xc4\x95\xc8\xc1\xbf\xf4U\xf2W\x80\xbe\xf5?\xc7\x01\x11\x88"g\x91\xbf,FEM\x93\xad\xf0?\xf3$\xf7$\xdea\xa4\xbf0\x87Is\xf2\xf3\xeb?\x18\xdf\xceV\xa9\xe2\xa3\xbf\xe2\xe1\xc7\x1a\xdd\xd7\xf0?\xba\xd4\xa9\xc5\xd1t\x8e\xbf\xa1HM\t\x91]\xf0?\xb1\x8a%\x1c\x85\xaf\x90\xbf{]\xf9T\xbdX\xef?\xbf\xa2^\xba\xc8g\x93?\xc4_+\x9a\xde\x0f\xf0?\xc52c\x96\x83\xd7\xbf\xbf\xc1{\x1f\x1d\xd1\xe4\xf3?\x0b\xc96gF`\xb1\xbf\xd5\xad\xb7"\xa2f\xf4?\xd4\x1e"\x1e\x8c\x97d?g\xb6\x89\x0bv\xd6\xef?\x94\xf4\x17\x8d\x18x\xb3\xbf\x91\x85\xcb\xd23,\xf2?\xd4\xf95h\x91*\x9c\xbf\xaa\x91&\x91\x11_\xf0?\xe2>\x1f\xf4$\x9e\xbf?\xe9{r\xdd\xa5?\xe6?\xdc\xd1\xd0\x90}\x88\xe7\xbf\x9a\x8b\xf5}\xff\xb8\n@\xb9\x02V_\xbeo\xb4?\x81\xdb\xa7\x9a"1\xf0?\x086\x88\xa2\xc7\x0b\xc4\xbf\xcd2\x93^v\xdd\xf7?\xe3\xff\x8c\x99G\xf9\xb1\xbf.\xf8\xf19I;\xf2?>\x8e*\xf5\x0b)\xd1\xbf\xddf\xfa[(b\xfd?w2\x923\xdd}\x83?}\xd8F\x19W\xa8\xe7?\xf5\x02\'\x80>w\x94\xbf\xf1\xfcq\x81\xf8\xc9\xf0?\x93\xbck\xab\xe2\xbc\xb3?\x15Dd\xfa\xc3A\xe9?\x16u\xa3\xa1\x1d?b\xbfJ1=\x12>\xd5\xec?IYlmc\xad\xa4?T\x8aKO\xed\xe5\xea?\xe7\x0b[\x832\xf3\x85\xbf\xa2\x1f\xa3X\x83\xa8\xf0?\xfd\xa4o\xabV\x1a\xab\xbfJ\xa3,@\xd6\xf3\xf0?\xf2\xa4\x90\xde\x18\xec\xad?M.\x9c\xf3\r\x19\xf1?<Q\xd3E\xe4\xafo\xbf$\xec\xc0+\x8c\xe8\xef?\\6\\S\x0c\x9e\xbd\xbf)\xbap\xa6\xd3\xce\xf4?\xa8T\xc2\x8e\\D\xaf\xbf\'F\n\x9e\x19\x84\xf2?\xd5\xd3hW\x08\xe4\x84\xbf\x9e\x9c\xc8\xb9*.\xf0?\xda\xa6s&\xfe\x7f\x9f\xbfMb\xda\xef7\x88\xf0?\x0c\x1bX\x870\x93\xae\xbf\x07c\xa3S\x97\x0c\xf0?q\xb6`\xff\xfc\xf2\x94\xbf\xb5\xb0\x02\x13\xc7\x95\xef?i#X7\x8c\x8b\x93?\xb2N\x03i\\w\xef?,\xd9\xd5\xb1\x0e=\xbd?!\xe2\xad\xc3\xd5y\xee?\x07U\xcfHaF\xb6?\xf7\xca\xf4\xb1\x0f\xa6\xec?\xa6oa\xd6\xef\x8d\xb9?\x03\xd0\x8f\x11/@\xe9?\xd6\xa1\xca\xa0z7\x9f\xbf\xca\x94\xff\xeb&\xa1\xf2?\xc1\x81\xcc9f=\xb8\xbfN\x85\xfc\x0fC\xb3\xf5?4\xb9\x9d\x125\x94\x9a\xbf\x82\xf6\x10\x1b\x1e\xb6\xf1?7N\xd3@\xb3\xdd\xb6\xbf\xd3\xea\x0b\xc825\xf1?\xb0\'\x8e\x04\xf1\x9c\xb7\xbf\xaa\xad\xa0\x99F%\xf1?$\x01\xce\xd7WwS?\x05\x8c\x89\xf0\xf7\x1d\xf4?\xc8\x15k5f\xdb\xbd?\xc7\xd5\xd1\xf4V^\xf1?$\x1d"h\x04\xb4\x9b?7\xb0v\x00\x89`\xee?\x96\x1d\x92\xbd\xff\x9a\xa4?L\xd9\xa2\xc3ch\xf0?\x00\rJ\x12\xeb:\x9e?\xaf\x9b\x0f\xc32\xe6\xf1?,&\xd0\x84!\x15\xa7?oQa\x14\x08q\xeb?\\\xbbtfZ\x93~\xbf\xaca+\x8b\x96\xcf\xf0?\x0fqN\x89\xbb\xed\xb2\xbf\xa57Q\xb9Gd\xf3?\xc4\xac\x94\x9f(/\xaf\xbf\n\x17\xadr\xbb\x9f\xf2?_\xa8\xc4\x89\xcak\x9f\xbf\xa0\xdb&\xe7\x0b\x1d\xf0?\x06\xa7K\x89\xf6\xb7\xb1?BGc[\x9e\x91\xeb?\xa8T\xce\xd0\x93\xfa\x98?>\xb9\xbfG\xd7U\xed?\x06#\x9fC\xe9\x8b\x80\xbf\xd6\xcf``TY\xef?\xf3*F\x8b5%\xc8?\x07\x9dK\x89\x89\x1b\xd3?\x17\xd2\xfc\x00n\x82\xa9?\x9e\xb17yH\x86\xec?\xb4\x15I\x8d\xc1\x11\x84?[\xd7\xe0\xc16\xae\xee?\x1b8\xc5N8\x1b\xc8?\x94\xdbE*\xbb\xa8\xeb?\x99\xfc!\xcd6H\xb0\xbfkl\x0c9\x02\xbb\xf2?\xed\x87+\x0e\x85%\x9a\xbf\xee\xea\x03\x81\xff\xb1\xf0?\xaa6*\xda|ca?O"\xe8\x04\xb8G\xf1?\xd4j\x87\xcb%Q\xa1\xbf\x95e\xd7\xd2\x01\x8a\xf3?\xc6cP\xa3\x86z`\xbf\xe9m\xc3\x8b\x8b\x92\xf0?\x823\xf6\xf1\x8b\xc8\x92\xbf#\xffS\xae \x10\xf0?\xa7\x1f\xf6\xc2\x17V\x98?\xdbn\x11_\x00\xc3\xed?D\x81C7d\xff\xa4\xbf\x9cc:\xf4\x0c\xe1\xf0?\xd9\xe7\xa1_t=\xa0\xbf\xeb\x8c\xc1m\xb1\xda\xf0?LA\xe3\xeb#\xd2\xb1?\xc3\xdd\xe6J\xf7\x14\xf0?\x00\xc0M\xb0X]\xa5?\xa2"\xa4_\xcb\xa7\xf0?n!uV\xe2\xfc\x88?}L!\x987m\xef?D\xcc\xcfB\x93\x0f\xad\xbf\xae&C\xf8\xcd\xe5\xf0?\xecY\xbe8\xe0w\x9c?\x10\x10\x05Ej\xd9\xef?\xb3\x03]\x9b\xd5\xcc\xa8?\t\x0cdb!\xfd\xeb?\x00W(\xe8y\x0b\x98\xbf\x927\x8c\xc2 \xdf\xef?\xe7\x86\xf3$9\x95\xbf\xbf\xa2sN\x8b\xca\x8a\xf2?\xfd}\xb4\xa4\x19\xd7\x9b\xbf+\x1ch\x0fS\x02\xf2?\xb1H\xf8\xf3^\x99\xb0\xbf$ \xefK\x1c\x12\xf3?XI9\xe8\x13/\x80\xbf5S\xdd\x01\xf8\xdf\xf0?\x1c`\xdc\xf1\x06\xbbr?X\x87u\xf0\xa7\xee\xed?\x15\x13\xc8\xe9\x7f(\xb9\xbf\x8b\x9a\xcd<\xf2\n\xf5?7\xf1\xd6\xf5\x93g\xa4?-\xbf\xba\xd4\x1a\x93\xee?M\x1a\x00\x8c/3O?\xf0}gd\xe6~\xee?&\xec\xcdt\xca\xd3\x95\xbfp\xaci\xd4\xc9n\xf2?o*\x95Bl|\xa7\xbf\x1e%\xaa\x7fB\xb6\xf0?!\xb9\x9c\xfcX\xe6\xa4\xbf\xc3cE\xa9\x82\x18\xf1?@$\xdf%\xeb\xef\x88\xbf\x1a\x83s\xe5T%\xf1?\xb1\xed\x9cS\xdcb\xf0?{\xb1\x01k\xe5\x0f\x98\xbf5W\x86\x01\xd1\xd3h\xbfw`\xc7%\xc5\x02\xef?Dk\x023zH\xaf?\x99\xd2w\xcam\x10\xf1?x\xe1Y\x8a\xecS\xba?\x90-\xcee\xf1\x8f\xf0?\x170\xc7\x10\xf2\xd1\xbd\xbf\xca\x86\x0b8\xc1\xba\xf3?\x99:\x8e\xb7R\x02q?\xf1\xb1\xe9T\xa9b\xef?A\xa4/6)f\xa3?\xc7\xcc\xd0,\x1d\xc3\xeb?\xa2\x19a\x85\xb6\x1c\xd6\xbf\xd5=1V\x05\xda\x00@0/WQ-4\xb6\xbfh B2c\x8e\xf3?\xbf\xd5C\xec\xd5S\x9e\xbf\xa3G\xb7\xa9\xde\xff\xf0?*\x889\xb2\xe5\n\xa5\xbf\x01v=\x94G3\xef?\x1b\x876\xc1~\x00\xc4?m\x90\t\t\xed+\xf0?l\xee\x01?qO}?\xc1\x0f\xa3\xfa)_\xef?\x16\xecX\x04\x8a\xf2\xae?\xb2\xed<E\xb5\xfa\xed?\x85\r\xf1\x18\x8f\x93\x8d?\x9b=\xc2\x0f\x81\x8a\xed?a\x96\xb2\xc7Gw\xc5?7\x00\xa5\x97\x1e\xec\xe9?\xeb#\xae\xdb\xf0U\xa0?\xfc\xa3\xbc\r\x962\xed?\xaa\xef\xe4K\x80\xf9\xab\xbf\xf4\xf5{\xacu:\xef?\xbfm\x8d\x1b\xd1{\xb1\xbfv\x18`\xc6\xf5\x90\xf1?\xbaG7@/\xb2\x8a\xbfY\x91\x84j\xc0g\xee?\xec\x9b\x1f`\xc7\xe5\xc5?\x8f\xd8S\xf0\xabU\xd0?\xd7\x0f\x87\xa1\xe3l\x91?D\xcc\xf0l\x14e\xed?\xa9\x8f\n\xc9k%\x9d?l\x0eo\x89\xfa\xed\xec?\xdfT\x903\xde\x8eD?}\xdf\x8f\x8aO\x06\xed?\xa2\xd4s\xda\xf7\x05\xa7\xbfoI\xce)\xbc\x8b\xf0?\x93\xec\xa5\xd2)\x91\xaf\xbf\xb71\xa2\xc7\xc5)\xf1?e\xa2:\x191a\xa5\xbfc\xd5\xc8\xd8!L\xf1?\xfd;\x8d\x83t?\xac\xbf\x8a\xf9\x8a\x06\xa0:\xf9?\x81\xf3v\x97\x7f\xeb\xa5\xbf\xd6\x97\xa9\x86\xb4\xff\xf1?W\x0f\x92\x98\x95\xa9\xc6\xbfI\xd8\xf7\xa3\xf7\xed\xf4?\xd4u>\x1d\xd3[\xb3\xbf\xf4\x92bJ\xc1\xc8\xf1?]\xb4H\xddi\xa8\xa3\xbf*\xb9J\x1d\xbb\x08\xf3?P\x006\x00\x12k\x95?\x87\xb4\x1as\xad\xb7\xec?\xc0\xb3\xaf!\xafS\xa2?\xe1\xa3\x80\xd3\xb0F\xec?c\xca\r\xfd\x0e\x12o?x\xa0(\x1b\xc7\xe9\xf0?,b\xa8\xc8\xd1^b\xbf\xaa\xda\xac\x8d\xdd\r\xf1?K\xa1e\x01R\xc8\xb1\xbfl\x96\\a^o\xf2?E\xdc\xc8\x08\xf3\x98\x8b\xbf}h\xbb\x9c1\x88\xf0?\r~\x02W\xae\xd0\x96\xbf\x0e\x0f\xb2\xd74\x94\xf0?9)\x83\xae\x06\xdb\x9c\xbf\x84\xc3\x88wu\xca\xf1?\xb4\xc3fl\x02NO?\xf4\x16\xa4\x0e\xa2\xff\xed?Z\xd8-\x08\xd4?\x8f\xbf \xdc\x92\x1fh\r\xef?\xbe2\xaa\x7f\n\xa1\x94\xbf}}v\x07\x84{\xf0?IN6\x84\x99\xf6\xb8?L\x0c8\xbe\x1c\xfb\xed?\xe3\x16\x81\xa2\xa9Nu\xbf[\xa0\x15\x9b\xeei\xef?(\xf5h\xb9\xd8\xb6\x86\xbf\xcc\xc9\x89\x9cy\x85\xf0?\x84`<\x087w\xa4?U\xd1\xaf{3s\xee?\x04[\xd5\'\x1b\xc5\x89\xbf\xd3P\xe8\xdd\xdd\x90\xed?3\x94\x1d\x85\xee\xd8M\xbf\xd7\xa5\x9a\xf5\x97C\xee?\xc0\x9eg\x87q-\x84?u-@4N&\xee?1\xdb\xee#\xb1\xfa]\xbf\xa4\xbb\xe1\xdd\xbe\xfc\xee?\xca\x8a\xdd\x99\xa8J\x9a?\x18E?&\xd4\xf5\xef?]@\xe1 _\xc7\xb2?\x15C\x95\xa5\x96\xec\xec?U\xd2+\x92\x13\r\xb9?\x87\x06\x8a\x06\x04\xc3\xea?La\x91OJ\xce\x84\xbf\xdb|\xf9)V:\xf0?\xe9\x90\xfc\xe1.\xd3\xd0?\xcf\x82_5NW\xe9?\xde\xfa\xeflU[\xa5\xbf\x8e\xa87L \xb7\xf3?Q\x0b\xddv\x8b\xd0\xad\xbf\xaaI\x91;:R\xf9?\xeb]Yc\xd1n\xb5\xbf\xf8YN\xb3w\x7f\xf2?)\x7fw\x89\x13\x19\x85?\\|\xe0\xb6\xec\xce\xf5?1\x16\xa3\xd5m8\xb0?\xb0\xde\x10\x85\x08\x82\xec?-\xe3fN\x1eq\xb1?d\x97~\x1b\xde\xcb\xec??\xcb\x85\x1e\x91\x04\x89\xbf\xfc\xdeMZao\xf1?l\x06\x14\xd4&\x13\xab\xbf\x1ebH\x80|R\xf5?q\x8es\n\x19\x8e\xaa?\xe1\\X\x92\xbb\x8a\xed?{SF\\(v\xa5?J\x11\xbf\xb7N\xf0\xe9?hy\xaa\x86\x8c\xd2\x8b?\x8an\x93Gg\xa5\xee?\x86\x17\xb1\x05ip\xba?7\xe3\xb2W_\x05\xe5?\x0e\xf8\x87\xc0\xe5\x9c\xa1\xbfK\xd4\xca\xf9\x8c\x10\xf2?H\xd1\xd23@\'\xc1?\xb6\x18\xed\x0f-v\xf0?\x86\xa5\xd5,aj\xb3\xbfV[\xc6u?\xb0\xf2?\x11H\xbeTD\xd4\xc0\xbf\xb1<\xda]\x90\xe4\xf4?\x8f-\xbb\x11\x08\xe0\xac\xbf\x85\xd4\x96U\xed\xde\xf1?rR\xc0n\xbe\x19\x9f?\xf83G\x15\x03]\xed?'
p75
tp76
bag2
(g3
(I0
tp77
g5
tp78
Rp79
(I1
(I2
I326
tp80
g12
I01
S'R\xf6\x05S#\x14\x94?\x1f\x99!\xbd\x01\x1c\xf1?\xa9S5\xad\xef\xca\x8a?\x8e\x91\xf11\x9e;\xee?\x95\xc2}\xf2sG\x87\xbf\x06\xa9\x1d\x93\xf5\xc5\xee?\xea<?\x0c\xe6\xf8o\xbf\xcb1c\xebw\xd4\xf0??\x9d\xceZC\xe4\x8e\xbf\xe7/\xa0\xe4\xea\x91\xf0?L\xdf\xbfis\xce\xa7\xbf\'\x08\x9e5\x85{\xf2?\xc0K\xa1\xe8\x1d\xf8\xe0?@\xbfeJ\xbc\xf5\xdd?\xf6\xa4\xec\xba\xb3+\xb1\xbf\xdd\xe1\xf6\x88\x8e\x99\xf2?\xe3i*Sv\xa7\x9e\xbf]}\x82\xa4a\x9b\xef?8P$\'\xd4=\xb5?\x85X\xd8/l6\xef?\x0e\x9a\x87\xa6\x11X\x80?|kQN!\xdc\xf0?c\xdb%\x90\x85\x87\xa0?\t\xb3\x94Vx\x15\xef?:\x08\xc3\xb9\x82\xe0\xa2\xbf\xc9\x97\x83\x81@s\xfe?\xbe\xd7\rl\x0e\t\x96\xbfz\x06r\xc0\xe3V\xf0?\xd5}\x11X\x9a\x97w\xbf|ng\xc7\xd9\x8b\xf0?+\xd4\x82\xb2\xe4h\x90\xbf\x8e\n\xe3\x0bx<\xf0?\x16\x9a\xa08\'m\xb9\xbfB#\xf2S:\xb7\xf4?\x93\x8f\xe7\x00\x14\x92\x8c\xbfkl4\x01\xf0W\xf0?\xc9\x06H\xc5\xb1\x15k\xbfJW\x93\xac\xaf\x03\xf1?\x06\xa6l\x9b\xd9W{?\xe9\x8f\xa6v=-\xf0?|-tpa"\x9f\xbf\xd3\x91\x18\x9c\xaf\xa7\xf0?\xda{\x83\xae\xa3\'t\xbf\xc3\x8d\x86\xbe\x81c\xf0?\xf0\x81n\x9b\x84c\xa0\xbf\xacK\xe1\xe5U\xd7\xef?\xa48X\x1b\xec\x8d\x91\xbf\xf7\x1a/\xf7\xb2\xad\xef?y\x96\x84E\x05\xde\xc1\xbf\x08\xab\xd6\xf4\xddU\xf1?\x87bR8)\xce\xc7\xbf.[tL\x83\xed\xf9?\xbf69\x9bs\xb3\x9a\xbf\xdc\x93+\x99\xd2\x86\xf0?2z\xc6"\xc5$\xaa?"\xf4%,\x10\xf5\xed?\x11m\xb0\xa8z\x84\xa0?\xa2%\xcd\x9bU\xea\xf0?\xb5_\x88\xb4X\xbf\xb6?\xc7\xceq\xbc\xcb\xd4\xe7?\x19\x8f\x91t\xdb\x8c\xb0\xbf\x11\xf9\xe04\xd7\x06\xf3?|\x049,a\x00\x93\xbfI\x9d\xc2\xc1u+\xf0?\t\x86\x97\x89U\r\xbb\xbf]\x11\x14.\x15\x16\xf8?9*\x01\x074\x96\x8d?\x85\x83|H`T\xef?\n(\x84.\x08|\xc1\xbf\x8f\xee\xa3c\x84?\xf7?\xaeq\xe4\xbb\xa5\x1c\x80?\xd4\x7f\xc9\xf1\x14\xd7\xef? (\xbe\x12\x87\x89\x99\xbf\xca\xac\x0c\xc7\x93\x05\xf1?-\xf6\xf6\xcdD\xc9\xb7?]\xcc\xcdS\xf7}\xed?r\xe2\xbfzV\x16\xa0?\x87_Q\x1dP\xf8\xee?8\xb5\xccb\xc0\x86\x85?\xc0\x06s\xce\x8c\x86\xee?\x9d;|\x0b\xfb\xef\xb7\xbf\x91g\x894\xda\x03\xf5?\x85\x86|(i\x8d\xa8?\x9fp\xd3YS\xfc\xec?^\x1a\nw~\xff\xd3?\xbfr2\x8e\x86\x15\xe8?\xde\xdb\x12\xad}s\xc0?y\xd3\xb1\xf6S7\xe7?\xd2\x9f\xc4\xbd\x02\x96\x9d\xbf\xba\xab\x9b8\xcc(\xf0?}\xa0+\xf31O\x86\xbfPB\xa9\xc4\xc8\xf4\xf1?\xe94\x1a&PR\xe6?\x83A\xa0ZY:\xd7?\xab*\xdb\xe4.\x85\x8a\xbf\x1f\x1c=v\xe5\x1d\xf1?_\x06\xee\x8e\xad#\xff\xbf\xb1\xd7\x97X\xd0V\x1c@\xeb\xc8\xa4\xda{\xad\xa0?19\x88\x1bl?\xf1?>4\x81\x89\x8fR\xad?\xc8}\x18;\x82R\xf0?\xbc\x88\xf4\xd4}\xe4\xbe?\x85\xab\x176\xc5g\xe0?\'@$\xe4\xcd\xe5\xb9\xbf\xd0\xca\x9b\xa2\x0fC\xf0?X^\x84\x15\xb6\xa3\xb2\xbfs\xc7\xee\x1c\x17\x15\xf0?\x7f\x96K\xd7\'\xb8\xc5?\x04\xc7\xe3\x05w\xee\xe9?\x84`\x80&z`\xa1\xbf\xed\xedZ\t\xaaa\xf0?\x9e=\x90=\xd4\x89\x85\xbf\x89S]\xe8\xc6\xd0\xf0?\xb7`\xfe\xbe\xff#\xe3?6\xc12\xfb\x16"\xe1?<\x9e\x1d\xb8\x1e\x14A\xbf\xba40_5\xfb\xed?\x0e\x8cj\x97\xd4\xaf\x9e\xbf1)S[\xba+\xf1?|\xa2\t\xc9\x81\x0b\xa7\xbf\xedYK\x19\x1f\xa2\xeb?\xd8\xdf\\\xcb\x88\xc1\x9d\xbf\x1bL\x1b\xa3\xb7\x8c\xf1?\xfd\xec\xb09\xb8D\x9f\xbf\xa5I\xb8\xcd@\x17\xf0?\xb6\x92)\xa6%\x18\xa1\xbf.[\xd2\xb5d\xbf\xf0?\xdd%^\xc5\x08Y\x8f?\x07\xf2mDUQ\xef?_\x13\xa2\xf0N\xbd\x8a?\x7f\x9c\xb1\n8\x03\xe9?\xd7\x02\xa0\x1e\xe1\xcc\xc8\xbf\x02\x94\xb7\xba\x17\xf6\xf4?\xe0\x93\xb2eSz\xb3\xbf\xb2S\x1c\x1fb\x0f\xf2?\x9e\x1e\xc9\xa6\x88\x11n\xbf\x98\xaf}\x90\xb6\xf8\xe7?\xea\xd9-\xc7c\x82v?v#6\x82\xfe*\xf1?\xf7:\x8d\xe5n\xa8\x83\xbf\x01\x8d\x17G[\xa6\xee?)~\x90\x894\x07\xa1\xbf:3iYK\t\xf1?\xc1\xea@\x16\xc6\xdf\x9e\xbf\xebr\xe3\xe8gX\xf0?^\xa9\'\xd7\xb7\x06\xb8?A\xf2\xfeX\xd9\xc4\xe5?FV\xb1c\xdeS\xb3?\x14\x8axb\x106\xe9?7\x93\x805]\xe6\x98\xbf\xc6\xb0s\x89\xe9\x11\xef?>9v\xe26\xc4\x81\xbf\x9e\xd13\x87\xdc\xd9\xf0?\xd7\x17\xd6m j\xb0?\xa7\x85}\x85`k\xf1?\xbb\xa0\x91\x84e\xf5\x82\xbf[\x88\x97\xc8\xce\x98\xf1?-\xf7\xe1\xe0\x7f\xa0\xa6\xbf^?#\xdaJ\xf8\xee?0\xa5\xb1\x19\xe74\xc6\xbf\xe0V)\x8a\xc0%\xf2?6\xca\xaa\x8ah\xd9\xb7?\x11\xc5=\x07\xc8\x90\xed?\xa8\xd4\x8b\x96\xc8&\xa3\xbf\x08\x81\xa3;\x8f\x86\xef?\xb1~\xd3\x19\xbc\t\x9f?\xcar\x0e>\xab\xe1\xef?\xc1\xcb*\xa0\xe2S\xaa?p\xc2fg\xe0\x07\xed?\xa1Y\xe9p\xaf\\\xa3\xbf\xdfe5\xe9\x1f\xee\xf0?\xeb\x03`\xfeY\xc1\xa7?\x15\'\xc5\x83\xa5\xc8\xed?xH\xd51\xae\x13\xaa\xbfsjC\xc2\xc77\xf2?~\x16\x9c9\x8c\xd5l\xbf\xadn\xb5=V\x90\xef?\xe6~\xc78,\x81\x94?\xc0l\xd7M\xb6\xf9\xef?\xa6\x85/\x9b\xfe\xc5\xa2\xbf\xb7\xf0\xabA\xa0\x0c\xf2?\x90\xe8\xc7g-\x9d\x90?\xffs\x83%\xc1\xc7\xef?^\xf14z\xed\x8a\xa1\xbf\xa1\xa9\xb7\x8f%,\xf0?w\xb8U\xf1G\x86\xb1?\xaf\xa2\x88:j\xa0\xe9?\xe5\xf4 A\xd74\xa8\xbfZ>D\x85Q\xbb\xf2?<\xc6Fga\xb2\x9f?\x8f\xdb\xb3&K\xf1\xef?\xd1y\xd7\xb2\xf6\xc1t\xbfSG\xd7*G\xdf\xed?c"!2\x1c\xbd\xb6?\x82\xa9YX\x81\x8d\xf5?t\xda\xd1\xb84\xb5\xa1\xbf\xd1Q`\xaa\x0f\x06\xf0?g\xa1\xe8\x13\xccww\xbf\xda\xe3\x8fA\xdf\xa2\xee?\x1e\xc2J\xc9V\xde\xa2\xbf%\x88\xee\xc7Ro\xf1?\xec\xb7|\xb3\xe0\x8e\x83\xbf\xfc\xe1\x171\x82\xb3\xee?\xbc\x1a\x18\xfe\x1dvp?AKi\xe5\xe54\xf0?\x04\x7fr}\xca\xc6\x96\xbfF\xa6:Yr\xf5\xf0?\x9e~\x9d\\\x88\xebq\xbf\x0f3\xa1\xa1T\xa5\xea?\x94\x8b\xf74\xe2HN\xbfY\xbc\x94\xaf\xe2\x99\xef?@\xecn\xeb\x01\xaa\xd9?\xa6\xee\x8e\x17k\xec\xf3?\x11~\xb6\x90fh\x8a?\xd9c\xeb\xbap\x18\xf0?W\xa8\xa6ZiH\x8a\xbfb\x99Z\xa7\x8d\x03\xf1?\xbc\x16\xcb\t\x9a\x10\xb6\xbf\x1f(\x92\xe4\xc9\xda\xf4?\x98\xe3\x0f\xc4(I\xc1?*\x9fy\x1d\x17]\xe2?\xca\xc0\xabR=\x10\xaa?"\xa4CD\xde\x03\xf0?\x98\xfc\xf3\x1fT\xdd\xac?`\xffAf\x8f!\xee?\xc6\xb4\x8e\t\xef\xbd\x88?|\xa0\xa8\x0e\x85.\xed?\x7f3g\xa1\xc0\x1c\x9a?\x17O7E\x01v\xee?\x03\xf6\xaa3_\xef\xb8\xbfyb\xd1\x02\xee \xf6?\xa5G\x1e\xa6I\xbb\xc0\xbf\x00\x08\x1a\x11BP\xf6?\xce\xe9Y\xf1m\x87d?\x0c\x1d\n7\x9c/\xee?jP{\xc5:\xfe\x88\xbf\x8ao\xd9w\xc6\xcb\xef?8\xd2\xe7K\xfdd\xb6?\x07\xe6\x9br(\x8a\xe5?\xf6\xae\x9d\x0e\xa7\x01\x97\xbf\xe8\xab\x04]\x0f\x0e\xf0?&\xd4 .\xe2\xfd\xcf\xbf2{\x9e2\x04\xf1\xfb?5y\x91\xa6\xf4\x8c\xa4\xbf&i\xb8\xbf*\xa3\xed?\xd8\xa3\x82G\x93@\xa8\xbf\xbf"\x00b\x02\xf6\xee?OQ\x1e\x00b\xcd\x81?\x0cg\xf7p{\x9f\xee?xZq+\xc7[\x89?>\xcaL\xec\xc5\x00\xee?\xa3d\x83V\xd6\xb6\xb2?0\x9b\xbd\xd2\xad\xd6\xe6?\'\xaaj\x84=u\xaf\xbf@\xcf\x8cv\x88i\xf2?\x85gB8\x03\x1e\xba?8\xbc!\x18J2\xe9?\xab\xec\x96\xa4\x84\xa7\xa3\xbf\x00Y\xf2\xe3\xc2\xd9\xf0?\xcb\x99\x10\xde\x9cs\x81?\x17\x16q\x99Z\x91\xec?)\\\xa6\xd2\xb2/\xad?:\xd3\x04\xd3\xaf\x9e\xeb?\xca\x18\xc5:\xe4Jj?\xdbV\x08\xf3\xa9\x0b\xf0?\xa0\xa7\xd2f\xb5k\x95?Z\xab\x10\xbf\xd4\xef\xee?\xad\xca\x82\xce\xa4\xe4\xb2\xbf\x14\xbdm\r\n\x90\xf4?z\xb8\x90\xd3v\x91\xb9\xbf\x14\xffY 5G\xf2?\xb6+n\xe4\'X\xe4\xbf\x81E\xec\x99\n\xf5\x06@\x99y$\xf6a\xb6\xb2\xbff\x17\xa1\xee\x02\x1e\xf1?D\xa4`1b\x96\x86\xbf\xc5-\xb0\x7f\x89y\xf0?\xcb\xcd\x1d\x86\xf0\xb6\x83?\xfc\xed\xec\x96?\xb3\xed?\xa2\xebTF\xc6\x90\x8e\xbf\xd1\xa8\xe6~\x01\x9a\xee?\x0f#m\xdc0\xbc\xa3?Y\xc9.\x06\xfd\x95\xef?\xec\x9d\xf7\xe8?i\x91\xbf\xb4\x88\xf3\xacZ\xa1\xf2?\xf9\xebu\xc3\xa9~m\xbfF\x96c\xc6\r\x94\xef?\x85HzC_\x18\x80\xbf\x85\xd5\x18\xd6\xf6\xdf\xf0?\x9a\x81\xf9A\xd3\xd0\x86?\xf5o\xab\x0c\xd8M\xf0?\xa0\xa6\x8f{\xa0c\x7f?\x9bJ\r\xf3+Y\xee?\xb9\xb8\xfe\xd6\xcb\x17\xb1\xbf\x17\xff\xce\xdd\xbe2\xf3?\x8cK\xccj\xb4M\x80?m\x143oQ\xab\xef?r\x15\x8d\'d\x87\x81\xbf+\xc2\xf6l\x1f;\xf1?G\xef\x83\x17\x83\x9e\xb2?FF\xdfi\x11\xbf\xeb?\x03\xed\xe9[\x07\xa3\x81?\xa32\x86q:]\xee?z\xb3\x99G\xffp\x87\xbf\x19VJJ\xc1\x82\xf0?\xef\xa9\x93\x82\xe9\x81\x97\xbf8\xf1Ag }\xed?\xaa\xcb. \x06q\xa6?\xe0Z\xc4\x82C\xe5\xf3?q\xf7\xb8PD\x8f\xd7?\xa1\x17\x1e\x03\xbc\x02\xf4?\xdaLPk\xb9\x12\xa7\xbf=\xf6\xa4\xd4\xe5O\xf1?.\xdf\xa8K\x94\x1a[?\xbe\xa1\xe5WLF\xed?\xb0.\xe3Z\xfb\x16\xba\xbf7\x95\xa1\x11\xdf\xab\xf0?\x1e\xf1\xec\xd8_K\xb4?\xb2\xbd\x90\x16\xee\x14\xf0?\x0eZ2\xe8\x8c\xf6\xab\xbf\xd4\xf1\x8cb\x05\x97\xee?\xdb_\xdbR\x91\xca\xb0?L\xab\xb2\x04\xb8\x9c\xec?\xef\x14;\x98\x1e5\xba?\xd0\xaeJ\xb5l-\xe5?B\x05K{\x980\x82\xbf>c\x7f\xfa\x022\xef?`\xbay\x08\xa1\x84\xac?\x8b~\x1e2W7\xea?\x0c\xa2u\x1c\x0eW\xb5\xbf\xdf\x96\xbc\xa5+3\xf3?\x8b\x11\xa8\xc7\x1c\xea\xa5?\xe6p\x98l/\xf2\xf0?:X\x1c\xc7\x9a\xdd\xa3?\xc2,\xb1)L\x86\xf2?\x11\xb1\xa6\r\xbc^\xb3\xbf\'"\x8f\xf2\xe3\x9d\xf5?\xfd\xe0D\x88\x01\xbf\xbc?\xaf\xf9f\xe0\x0f\x1c\xee?j\xe8\xc2&R\xdfp\xbf\x1f\xcf*L]@\xf0?\x01\xb4\xfe\xf2\xbc\xf8\xa4\xbfyX\xe02(J\xf0?\xf6\xa8\xf5v\n4\x98?\xb6\xca\xc7\xe4^Q\xec?\xbeW\xc1W\xd4\x84\xa7\xbf\x1c\xf5\xf2\x15[\x04\xf3?B\x9c\x0e\x9d;\xab\x9b?\xa3\x9c\x0f\x99\x9c@\xec?\xc0D\xe1\xcd\x82*\x90\xbf\x9e\xc6\xa3\xdb\x81O\xf0?\xa4BRC.\xd9\x87\xbf\xfbw\xc5\x9c\xf1\x86\xf0?1+ \xa9\x91\x08p?[\xd0\xf7R\x9f\xea\xef?\xbcQ\xa2\xa1d\x89\xb3?\x85\x05\xe4\xbf\xd0\xbc\xec?\x9d=\xaf_\xa9\xc0\xa1\xbfP\xc1\x93\xb4\xf7t\xef?\\\x99g<\xfa\x0f{?\xe61\n\xd6v\xcc\xed?\xba\xbe\x9e\x82l;\xb4?sv@\x18O\x1a\xed?\xd3\xc0Pc\x9f}\x83\xbfA\xee\xa7\x9c\x98\xa5\xf1?:[\xfb\xfd\x13m\xb0\xbf\x8d\xf7\x89hM\xdf\xf3?\xfd\xc2\xb2P\xe4Ln?\xfaF\xb2x8\xad\xed?3\xe1\xac\x0e\x89\xf8\xa9?bn\x84\xea\x91\xbf\xee?\x93\xf9\x96\xf0\xb6\xde\xb3?:%\xb0\xaf\xfa+\xea?\xebQ\xd4-e\x10\xa2\xbfbY\xcc\xde\xf4\x0b\xf2?\xe6.\x83\xd9CB\xb1?\xb5\x87\xa9%/\xbd\xeb?\xcd\x06\xad\x82\xf5\xdbm\xbf\xd2B\x19\x84v\x8a\xef?\xc9\xcc\xcf\xc5\x02?\x86\xbfW.-\xca\x0b\xbb\xf0?\xf2S_\xb6m"\x93?c\xc9l\xc8\xae\xa7\xef?J\xf0t\xd2j0n\xbfy\x92~\xab\x9ef\xef?\x0b\xdb!\x8a\x07\xa7\xb1\xbf=\x12j\x9c\x8d\xf4\xf2?5\xf5\x8c\xa4$L\xaf\xbf\x07!k\r\x98\r\xf1?u\x8b\x133\t\x0e\xb8\xbf\x94\xc4\xf5\x15\xdb\x19\xf2?CRv\x0e\xf6\x17\xa1\xbfD\x9fX*\x08\x9b\xf0?\x1a\xf9Hd\x92\x99\x82?\xefa\xf5\xdf\x8e\x0e\xf7?\xf4J\x15\xb6\xd1\x03\xaf\xbf\x16H\xfd`m\x80\xf2??\xb9\n\x83!z\x92?/\xc0{\xe7J\xb5\xef?\x82\x16\x07\x13\x13\xa2\xa0?\x9d\x07\xad|h\x90\xec?\xb6\xfb\xc7\xf8%\xf6\x91?\xb0\xd3\x1cb\xe0j\xe9?\x0b\xa8\x95\xf2d\xac\xa8\xbf\xdbV_\xf1\xd9-\xef?f\\\xaet\x19]\xaa\xbfD\xd60\x97\x87\x1e\xf6?r\xba+\xa4r7\xb0\xbf\xb86\xb9\xfe11\xfa?\xc0_\xf9?>\xb8\xaf\xbf\xf9\x96\xbdnr\x16\xf1?\x1b0\xcd.\x980\x90?\xf5\xa6\xdc\xf9@\xba\xed?\x06\xaa\xde\x03\xdeb\xbc?\x18\xabo!;\xd4\xe5?h\xd1N^R;\xa7\xbf\xb6\x90\xcf\x02\x0e\x00\xf1?\xa9\xea\xa6\x149$\x97?b\xa7\xf3\x16\xd3\x11\xec?S\xb3\x1c\xd3X\xe2\xa9?\xa7\xe8\x9c\xfa\x7fH\xf0?T\xbf.Z\xae\xe7\xef\xbf\xb5\xa0\xe3}\xd3\x89\x0b@/al\x81\x9c\xa4\xa1?K0\n\xcc\xbd\xca\xef?,\x11\xa0\x1d\x15\xa1\xa0\xbfw\xa1\x86\x91B)\xee?W\x07\x1a\xd4\xd8\t\xa0?\xe3\x0c\x8b\xf8\x87\xb0\xef?9\xb7@J\x7f"\x8b?\x0b\xcc<\xfe]\x87\xef?\x83f@u\xd5\r\xe9?g(\xe1@\xcf\xb3\xf1?\x18\xc8\xbb\x8cC}\xaf?2L\xd5\xb5\x99\xc1\xef?b%\xd05<\xd5v\xbf\xcc\x88\xd4\x86Om\xef?R\x12\xdaC\xeb\xc8\xa9?\x9a\xd9e#\xf2\x8a\xe9?\xf6\x8eaUW\x9f\x95\xbf\x94\xd7<\x9bKf\xf2?\xcf\x91X\xd0\xb4~|?|\xbd8l\xeb\xb1\xf0?\xa3\x94p1\xd2\x11\xbb?\x84\x8aKQB\xbf\xed?\xd62\x85XT\xff\xa9\xbf;\xd6"\x8a\xcb\xb8\xf5?\xbfR\xed\xef\xe0\xbbX?\x83\xa2U\x82\x9a/\xef?\'V\xe2\n\x19!\xc0?Pu\xa7\xd0\x82\x0b\xe7?G/\xac\x88\x9f\xb0\x9a?J\x8e\xb3Z\xcdg\xf0?,\xb3\xda.\x87]\xcc\xbfFAk\xa2\xc0\x84\xfb?\xccF\n<\xb5y\xa7\xbfR\x12\n\x10\x07\x96\xf3?\xf8\x16\xa4Y \x9f\xa5\xbfb\x801\xdb\xc8\x8a\xf1?L.G\x91\x93\xf9\xb7?\x97\xac\x83@h\x9a\xe9?\xb2\xb6;\xf7}\'\x99\xbf\xa5\xdc\xe8\xe3\xe6\x0e\xf0?\xa0\x9a\xa8FQ\xaeQ\xbf,\xb7bNWB\xf0?[\t\xb3\x0f\xd2\x1b\xaa\xbf\x83[\x9b4?!\xf2?\xbd\xd8\xc1\x1eB\r\xb7?&H\xfb^\x13&\xe8?\xf7\xean\xf0\x1a\xe0\x85?w\x1d\x1br[\xfd\xee?\xbf\x98\xa8\x87\x84\xfb\xa8?@E\xd0\xf5J\xfc\xec?m\xe3\x19\xeb\x8c\xb1\x85?\x81fZ\xf4\xdf\xdd\xe9?O\xf0\x95\xf5\xf5e|?\xeeY\xd1\xf3\xc0b\xee?r\x92\x8f\t\xac[\xa9\xbf\xec0\xfe\xf95Q\xf0?\x19\xa6W\xb7\'\x15s\xbf\xbc>\x13\xf39\xa1\xf0?\xb5\xa5Q\x02\x7f\x99\xbe\xbf\x1d\xb3!\'\x1e\xd8\xf4?*\xdcg\x1b[\xa2\xa5?\tj\x17q\x15#\xef?\x14yp\xb1.=\xa7\xbfA%\xe1\xbd\x17\t\xef?\xb8\x8a\xdb\x05;\xb1\x84?(\xe4h\xeb\xe93\xf0?\x9e\xd4\x80X\xfe\xd4\xec?\xac\xdf\xfe\xf1\xe4\xe7\xb4?2\xa0\xc7\x8d<L\x7f\xbf\x91z\xfa\x1d\'N\xef?\xb5i\xbd\x9a\xe9\x86\x9c?!b\xfc7\x0b8\xea?\x98\xbcc\x8a:\xb5\xc6?"\x0f\xbd\xb7Y\xec\xe3? 5Lc\xaa\xe4\xa5?\x80\xce\x96[\x9c+\xeb?GX\xf5\xd47\x80Z\xbfK\xb6PHl2\xf0?\x7f\xddB\x81\xf5\x14\xd0\xbf%\xce:\x86\x89~\xfa?~\xc3e\x85\x84\xdb\x92\xbf7\xd2\xeb\x96\xa8\xcb\xf1?!X[\xe1\xaf\x8f\xb0\xbf\x9aJ\x1c\xb7~C\xf2?\xf4\xb0XJ\x8c\xa3\xb9\xbfNT\xffa\xcb\xe6\xf1?\xbd\xdd#\xab\xb3\x99\xa0?y\x83Q\xad\x80\x87\xec?\xaaj\n\xb6\x17\xa4\xb8\xbf\xef\xf2\x90\xd1\xa6?\xf3?\xbb\xaeGb\xee%\xb1?\xfbr\xef2G\x12\xed?\xa2\xb3m\x1d\xf29\xc0\xbf\xa2\x15\xdc\xcbV\xfa\xf6?\xf5E\x07\xd8/\xbb\xae\xbfeu\x00\t\x84\xf1\xf0?R\x8a2\xec\xef\x81\xb8\xbfx\x08cW\xc6|\xf4?<\x01B\xd2!/\xce\xbf\x1b\xf8:\x9db\x13\xfa?\xf7\xb6ih,\xc3\xb9?1\'\x94"\xfc\xaa\xe7?\xa0U\x9e\xfe\xa4\xef$?TmD\xd0\x02a\xea?\xd4\x1d\xca\xa2\x88\x07\xa4\xbf_\xb7c\x95Z\xad\xf1?^)\x9c\xe4\xf4\xca\x87?\xb3wx\x8b\x84\x8a\xec?we6P\x97K\x82?\xd5bnS\x10\xa6\xe7?F+z\x8e\x8b\xd0\x9e\xbfX\xef\xa2\xaf\xce\xab\xef?\x7f\x8d\xb9l$@\xb1\xbf\xa6mvWZ\x80\xee?\xa1\x14\xb3[E\x02~\xbf\x8a\x17.\xdb\xff\xd3\xef?_\x17\xf0\xe5\xe7\x92\x8a?\xc0\x8c\x9bO\x05)\xef?:\xa9/F\x86\xb1\xa0?HH\xefM|\xc5\xe6?\xd0\x1b\xb0M\xc8\xd9\xaf\xbf\xcb\xea\x85\xb7\x95\xa4\xf2?\xa0\x82\xa7,\xb4\x9a\xae\xbf\xe7\xcc\xf2\xab\xd8\xaa\xf2?\xd0\xcb\xf4C.\xa5Y?p\xb7V\xae/r\xf0?lWMj\x96\x061?\xb8\x8b\x11\xc5\xf5\x83\xee?\xcej\xc6\xb7h\xffW\xbf]!\xd8\xb2v\x8c\xf1?\xcdp\xf5\xf1\'\xa7\x87?o\xed_\xd6u\xac\xf0?gs:\xf4e\x08\x88\xbfB\xdb6\x18\xaf{\xf4?\x83\xf9\xf7u\xc5\xc4\x8c\xbfkc\xff [\xbd\xef?e\xec\xeco\xe8m\xa6?&\x7f\xc4\x85J\\\xef?\x9cb\x8f\xe4s=\xb4?\xd2\xbf\x9a\xcd\xa2$\xf2?\xae\x1dRA\xf2E\xa0\xbf\xd0h+\x85%\xe3\xf1?\x7f\xc9/\x8b\xa1\xea\xb0\xbf\xf8h\xe1\x16\x02\xc7\xf0?;Y+\xdf\x12\x88\xb1\xbf^\x0f6{\x85d\xf2?\xd1p\xb1R\xb1\xb3\x96?\xf4%q\xd1L\x8c\xf0?n\x10\x06p\xea\xc0\xc7?\x9dM\xf1\x08`\x16\xe7?c\x1e\xc0\xa52\xb4\xc9?\x03\xed\xe0\xb3$\n\xea?\tZ\x96\xb5\xce\x87\xa2?\x8c\xf2\x01\xe54\xf3\xed?\x1a\xabD,\xc6\xea\xa7?\xa1_P\xf5\xb4\xab\xee?\x8e\xa98\xebxf\xc4?\xea6\xaad)\x16\xe8?\xa1f\x01\xfc7g\xb9?/\x03\x7f\x12\xb1\xbd\xe6?\xfb|\x16S\xea-\xac\xbf#\xcf\xe4\xd2?1\xf2?Yuy S\xc8\x89\xbf\xf5]\xc2\xf6N\x16\xec?f\xad\xf1F\x10\xee\xa2?\xc7\xd5\xc0y\xf1P\xee?\x8a%\xbc\xa8\x0fa\x9e?\x836\xce\xb7\xca\xf2\xea?\xec\x81\xe9x\x0e\x99\x95?mT\x1c\xf4\x7f~\xf0?\xdc,\x95\xef\xd7\xe5\x9c\xbf\x8f\x1fDS.\x8c\xf1?\xc5P\xe3\xe3\x8b2~\xbf\x04`\xde\xdc!8\xf1?\'C1>\x05\xd3\x82\xbf\xc8\xcfv\x1f\xaeq\xef?`\x18\x1aM\x93\xf0\xb3?\xa2\xae-\x08H\xab\xec?\x06\x00\xf5\xc0\x8a\xf3\xbb?\xec\xfb\x16\xdeu\x86\xe3?m\x96L<hqe\xbf\xe8&V\x17\x14\xac\xec?#\x9d\xed\xac\xd2\xdcz\xbf\xdf\x1d\x14\xcac\x98\xf1?\x99\xf4!\x8eN\x99\x91\xbfu\x12\xb4F6\xf7\xf0?\xfei\x0bg(\xcf\xb9?^\xd3\x83/\xe3\xc5\xe7?\xca\xcb\xa2\x16\xc1\x0b\x95\xbfU\x82}\xee\x80\xa4\xf0?&\xc0u\xacg7\xba\xbfc\x99\xc3Z\xa67\xf0?\\*I\x97\xb5\n\xb5\xbf\xac\xc9\xdb\xf2yA\xf3?\xeb\xbf\x97\xfe\xda\x17\xa0?M\xaa\xe3Mw\x9a\xed?\xe6\x8c\x8d\xec\x15Cn?v7\xe9KR\x9c\xf1?7aI\xe2KPY\xbf3P\xd4\xcf\x9c=\xf1?Gl\xd3;{q\xc7?\xd7HC\xdfs\xa8\xdf?\x19K\xe9\\\x04\xa3p\xbfr\x14Z\x8e\x16\xb7\xee?u\x96\xca;G^\x8d?T\xd9\x11\xeb\xaa\xb5\xf0?]\xbaS!\xa0\\\xb1?W\xeaZQ\x0e\x04\xeb?k\xf9I\xe2\xd7\xa8\xa1?l\xdd\xca]"\xa0\xef?u\xce\xd1\xa2\xf6\xcc\xa0?\xb1\x13\x0e\xd4\xba\xd6\xed?\x8e\x8e\xc7h|v\xbb?\x1c)\x9a\x9a&\xde\xe4?K\x8cx\x19F\xe4\x98?\xa6v\x91\x15\xd6\xe2\xee?\x13\xe9Q)!\xee\xcb\xbf\xb5i\x86\xee\xd9\xa3\xf8?\xbc\xaaE\x9dbo\xae\xbf\xf1\xd9V\xc7\xe3\x89\xf0?\xa35\xcdu\xbfB\xaa?\xb6Z\x9bo\xd0\x12\xed?\x08\x7f\xea\xd2\x1f\xf2\x87\xbf9\xbe \xb9\xe0\xa4\xec?gv?\xa1C"\x92?\xfc@!\xf9*R\xec?\x10R\x985~\xe3\xa8\xbfI\xc7\xaf\xa6*Z\xf1?'
p81
tp82
bag2
(g3
(I0
tp83
g5
tp84
Rp85
(I1
(I2
I107
tp86
g12
I01
S'\x16Vq\x94\x9e.\xb5?$J\xe2\x9f\x7f\x9d\xe4?\xd29\xb4\x8b|p\xcb?\x97\xe7\xcd\xdf\xb6\xaa\xe6?\xe9-\x82\x9f7\\\xb2?\x7f\x97\xa4\x10G\xb9\xe2?\x9cc\xcc\xce\xb1n\x8d\xbf;=O\xf7\xa6A\xf1?\x830;\x823Rw\xbfV\xbf\xd0\x9f\xc5\xd8\xec?r\x1fS~\x15\xf1\xe2\xbf\x0c\x99\x17\xf2\xcf\xd8\x05@\xe5\x96\xcc]\xa2\xc2\xc8\xbf\xfb}\xa0\xac\x08\x92\xf2?\xc3\x05\xb3A\xcf\xff\x14@\x95C\xca^\xda7\x0f\xc0\xfb\xb2\x96~\xcf\x04\xf2\xbf;\x93;y\xf9\xf6\x15@\x1aSu\xea\xb1@\x90?\xdd\xad\xac\x95\xa1\xaa\xec?\xfa\xb3xP\x8d\xa5\xa6?\x06\xac0\xa8\xeb\x08\xe8?\xa2|\xce\xd0\x81+\xd0?t`7N\xb6\xa6\xe2?\x92\xda>OK*R?\xb4\xda\xb47\x1f\xff\xf0?jO\xaf}\xa9\xb2\x8f\xbf\xbe6\xfa\x90\x11U\xf1?T\xab\x0f\xaf\xa8W\xa5?\x9f\xf6\xcd\x12\xdb\x89\xf1?\xe53@bh\x01\xc0\xbf\x8c=\x86\x86;\xb8\xf4?l\xf2P <\xe9\xc0\xbf\x1e\xd3\xe8e76\xf0?~\xe2v\x8a\x05\xc1\xcf\xbfG3o\xf5\xea6\xfa?F\xfa\x7f\xe4\xd2\x81\xa4?-,\xc7\x00\x96H\xec?\xcb\xeam\xd3\xe3&\xc6\xbf#\xef\xac\x8b\xdd@\xf8?\xab\xe4\xb1\xddv:X?\xf3K2\xd8\x88\xa7\xed?\x0e\xdf\x81\x1f\\\x13\xd4?@\x0cU\xd3R\x07\xe4?\x98\x13\xd4\xf8\xef\xd0\xac?\x04\xd2\xd0&\x9fV\xea?i_|\xa9a\xc2\xa4\xbf9D[\xd7\xa5\x1e\xf0?\xf7J\x99\xf8\x91\x92\xb4\xbf~\x14\xbf\xe9\xa1\xb4\xf3?\x92b\x03\xaf\x86\x94\xaa\xbf\x00\xe0-?;\xc4\xf1?\x156\xf7;\xf8)Z\xbf\xa0\xae\x99q\x8e\x86\xef?\x86\xc2Ho\xafq\xb5?\xce\xc4\x13\xee\xf0\x89\xf6?\xafNu\xf4\x1c$\xaf?-\xd8\x94\xa6\xb4r\xee?C\xab\xde\xf5]\x7f\x83\xbf\xf8\xbbt|\x1e%\xf1?\x7ft\xc4%Y\xde\xc0?+\xc1\x1c{\xfe$\xe0?\xbd?Fn\xeb\xc9\xea\xbf\x08r\npb\xea\x12@Xl\xc6\xe2\xd3\x14\xb5\xbf\xdf K\xdf\x8f\x90\xf1?\x9d\xcf\xf0m\xa0L\xa1?\xe8\xcb\x9f\x82#\xd0\xf4?\xc4\xdcb\xe4\xf4\x9c\x84?z\xe6M\xb2\xd4t\xef?\xd5u\xcf\x83=\xe5\xb7?9g~\xa9\xd9@\xe8?f\x00\xfd\xb1nm\xb2\xbf%f\xbaV\xc6\x8e\xf1?\x8f^\x81\xad\x19\xbe\xa4\xbf\xf0\xbe/\xf8\x07 \xf0?\x87\xf4\x9f\xdb|\x01\x9c\xbf!\x9ch7\xa0\xfe\xef?\xaf\xdb\x1a \xa8\xd2\x93\xbf\xe0\x01h\x92.\xd1\xf0?\xab\xe7\xa3\xd3R\xb2\xb2\xbf\xc3\xe6\x826\xb7\xdb\xf0?\x9fh\x1c\x1d5\xec\xc3?\xf4\n7X\x0f\xf2\xea?\x9dZF\xe95\x16\xc0\xbf\xcb\xfd\xa9G\xabh\xf3?\x04\n|\xad\xc5\xa3\x9d\xbf\xd9^\x1f\xf2c5\xf3?\x10\xda\x18\x10\xf6\xdd\x82?\x89\xe7\x8e\xf3\xbcm\xf1?\x1a,\x94\xca@I\xb3\xbfl\x15\x06\x01\xf1\x9e\xf1?Be\xef\x8c\xd0i\x91?\xcam\xaca\xf5\xec\xf7?\x1bZ\xb6\xfbc\xab\x8e\xbf9%\x06a\x9e|\xee?\xbf{\xcbF\x9cw\xa3?\xdf\x10\xf8\x91\xf9"\xea?\xf7\x8bd^&\xf8\xb8?\xdb\xf60\xdb\xabt\xf6?C\xf2JN\x0f\xbd\x82?\xd0Tn\xcaj\x05\xef?\xfe\x1c\n\x9f\xefj\xb8\xbfbE~\xf0\x88\x84\xf0?m\x99\x04\xee>\xd3\xa0\xbfV)\x0b\xdf\x12C\xee?X\x16\xe8\xffQy\x86?\xd6^\xee(\x9b\x1d\xed?\x10+\x97W\xf7\xa0\xa6\xbfr\x1f\x8d\xc3\n\x04\xf0?\r\xfdk!\xfe3\xa0\xbf\xa1\xbf\x90\x8a\xc0V\xf2?\x11s[<\x9e\xc8\xb3\xbf\x8d>\xea\xef-\'\xef?\xf1\xdaC\xfc\xb0\xbe\xbc\xbf\x07W\xdf\xa6\x8ac\xef?\xe5S\xce9\xf1B\xb1?\xcf{nY\xb9<\xf1?`-\xea4n\xc7\xe0\xbf\xfeGC]\x03p\x05@\x9c\xb7\xaftV\xfe\xb8\xbf\xfd\xdc\xb0\xe8\xbb\xa6\xf6?\xac\xb5\xa9\xb5\x83T\xcd?\x88!\x06\xe0\x11\x97\xe7?\xf7\xf0\xff\xb9\x92\x95\xb4?gz\xf1\x10\x94\x8a\xe4?:\xc5\xb7\xe3\xf5\xaa\xd1\xbf\xfbW\x87+\xd9}\xfb?\x9d\x82qX\xfaP\xcd?\xd6\x9a\xe4\xeb\xa5G\xe7?\x94?\xe5\x02m\xdb\x8c?\x1f\xfdi\x19S\x84\xef?\xb6\xae\x9a\x87\xaaG\x11@O`ENx\xca\x0b\xc0 \x1e\xe7\xbf\x13\xb2\xaa\xbf\x19\xbe\x991\xf3\xed\xf1?\x84"\xa9\xe4Y\x06\xb0\xbf\xc6\x18[\x0e\r\xbf\xef?\x99(\x16\xcf\xbb@\xb5?{\x1f\xbdf~\xe4\xe9?f\xdb\xa6k\xccE\xb0\xbfX\xcc\xae\x9cX\xcc\xf0?\xa6q\xb6Vt~s?J\xac\xff\x04\x85\x17\xec?\xbb$\x03\x8c\x0eF`?\xb4\xb1\x1e\xbb\xa6\x91\xf1?p\xf3\xb5\x9b\x8a\xb5\xba\xbf\xd3\xfd\x14\xc8!C\xf4?\xd0\xfe\x9c\xad\x1b\x9e\x92\xbf\xf5[\x85\xe0\\\xce\xf1?\xbd*\\\xae\xceg\xa9\xbf7\xb8.\x13l\xb6\xee?\x1bW\x11P\x1c]\x81\xbf[\x01\xb6[\xf3\xce\xf0?\x12=\x9dKC/f?\xae\xc5\r\xa9\x8e\xd4\xec?\xf7\xcb\xca\xc5\x7f,\xca?\x183\xbd\x8e\xc7\x0f\xf1?}\x98\x94\x12\x8bo\xaa\xbfw\x18&\xdbw3\xf1?\xf5~(=\x9a\xe6\xae\xbf[\xabjk\xde\x0e\xf1?\x00dh\xe0\xfc\x06\xc6\xbf(~bC\xc5\xb9\xf3?I\xf3\x01n.`\x9b\xbfx\xc7I\xff\xb5?\xee?-f7O\x0f\xa6\xb6\xbfd\xe1nQ\xfd\x8b\xf2?\xf9#\x0e\xde\x94\xea\x92?\x8a7\xbb\xdf\xb8)\xee?1\x95&)l\xd3\xac?\x8cu\x9e\xe0D\x00\xec?\xccZ\xcd\xd1P\xe8\x8b?\xd4\xc8\x9aFi\xac\xf0??\x91\xfde\xad\x01\xa8\xbf}\x7f\xc4\xab\x14\x86\xef?\xe8_\x11\'\xfd:\xad\xbf\xc1[\xd9QO\xa6\xf1?C\x0cHOU\x05\xb2?\x8d\xcd\xbb\xca\x97u\xeb?\xe1I\x16y\x8d-3\xc0\x16U\x9dB\x0f\x98M@6\xb9J\xb3\x1a\x15\xab?9@\xb6g\xd9\x04\xed?XY\xf7\xa6\xad\x95\x96?@\x8eO\xaf>\x06\xeb?\xd8\xec\xca\xf2\xbd\x16\xb9\xbf\xb4\x1bi\x89E\xab\xf1?\r\xcfzb\x7f\xa2\xb8\xbf\xb8\xcb4;!\x93\xf3? QLP6\x00\x9b\xbf\xf6\xf30\xeb6\xf3\xf0?^#\xb5\x15w\x1e\xb5\xbf\xa1cW\x91~\xdd\xf3?\x8e\x99\xc6s \x04\xb9\xbf\x81\xb5\xd9a\xf5\xd4\xf2?\xe7\xf0\xcb\xed\x91\xdb\xc8\xbfq%\xe8J/q\xfe?\xde\xb08\r;\xa8\xa0?`f\xbd\x8d\xa6m\xe8?\xbc3\xf6\x08n\xae\xa1\xbfb\xfc):\x06\xe8\xf2?\xa4X\xbdA\xb1\x0c\xac?ksM\xf7\xcd\xdd\xec?\x90z\xd8W\xc0p\xa4\xbf\xe1l^`\xd5T\xf1?\x9b\xc0R\xca\xb6s\x96?\x1a\xfao\xeb\x10>\xef?\xf4)$\xdc\xa1\\\xa5\xbf\x85p\x86,\x12\xd6\xf0?\xd8\xdf\x9a\xbe\x00\xfc\xa1?\xb3\xae\xeb\xab\xd0\x94\xeb?f\xc6\xa3\xf2$\x89\xe9?]\x19\xb3B\xa7\xb3\xd0?'
p87
tp88
baa(lp89
g2
(g3
(I0
tp90
g5
tp91
Rp92
(I1
(I2
I64
tp93
g12
I01
S'\xc4\xfcC\xc9\xe0j\x98\xbc\xfc\xff\xff\xff\xff\xff\xef?\xc4\xfcC\xc9\xe0j\x98\xbc\xfc\xff\xff\xff\xff\xff\xef?\xc4\xfcC\xc9\xe0j\x98\xbc\xfc\xff\xff\xff\xff\xff\xef?\xc4\xfcC\xc9\xe0j\x98\xbc\xfc\xff\xff\xff\xff\xff\xef?\xc4\xfcC\xc9\xe0j\x98\xbc\xfc\xff\xff\xff\xff\xff\xef?\xc4\xfcC\xc9\xe0j\x98\xbc\xfc\xff\xff\xff\xff\xff\xef?\xc4\xfcC\xc9\xe0j\x98\xbc\xfc\xff\xff\xff\xff\xff\xef?\xc4\xfcC\xc9\xe0j\x98\xbc\xfc\xff\xff\xff\xff\xff\xef?\xc4\xfcC\xc9\xe0j\x98\xbc\xfc\xff\xff\xff\xff\xff\xef?\xc4\xfcC\xc9\xe0j\x98\xbc\xfc\xff\xff\xff\xff\xff\xef?\xc4\xfcC\xc9\xe0j\x98\xbc\xfc\xff\xff\xff\xff\xff\xef?\xc4\xfcC\xc9\xe0j\x98\xbc\xfc\xff\xff\xff\xff\xff\xef?\xc4\xfcC\xc9\xe0j\x98\xbc\xfc\xff\xff\xff\xff\xff\xef?\xc4\xfcC\xc9\xe0j\x98\xbc\xfc\xff\xff\xff\xff\xff\xef?\xc4\xfcC\xc9\xe0j\x98\xbc\xfc\xff\xff\xff\xff\xff\xef?\xc4\xfcC\xc9\xe0j\x98\xbc\xfc\xff\xff\xff\xff\xff\xef?\xc4\xfcC\xc9\xe0j\x98\xbc\xfc\xff\xff\xff\xff\xff\xef?\xc4\xfcC\xc9\xe0j\x98\xbc\xfc\xff\xff\xff\xff\xff\xef?\xc4\xfcC\xc9\xe0j\x98\xbc\xfc\xff\xff\xff\xff\xff\xef?\xc4\xfcC\xc9\xe0j\x98\xbc\xfc\xff\xff\xff\xff\xff\xef?\xc4\xfcC\xc9\xe0j\x98\xbc\xfc\xff\xff\xff\xff\xff\xef?\xc4\xfcC\xc9\xe0j\x98\xbc\xfc\xff\xff\xff\xff\xff\xef?\xc4\xfcC\xc9\xe0j\x98\xbc\xfc\xff\xff\xff\xff\xff\xef?\xc4\xfcC\xc9\xe0j\x98\xbc\xfc\xff\xff\xff\xff\xff\xef?\xc4\xfcC\xc9\xe0j\x98\xbc\xfc\xff\xff\xff\xff\xff\xef?\xc4\xfcC\xc9\xe0j\x98\xbc\xfc\xff\xff\xff\xff\xff\xef?\xc4\xfcC\xc9\xe0j\x98\xbc\xfc\xff\xff\xff\xff\xff\xef?\xc4\xfcC\xc9\xe0j\x98\xbc\xfc\xff\xff\xff\xff\xff\xef?\xc4\xfcC\xc9\xe0j\x98\xbc\xfc\xff\xff\xff\xff\xff\xef?\xc4\xfcC\xc9\xe0j\x98\xbc\xfc\xff\xff\xff\xff\xff\xef?\xc4\xfcC\xc9\xe0j\x98\xbc\xfc\xff\xff\xff\xff\xff\xef?\xc4\xfcC\xc9\xe0j\x98\xbc\xfc\xff\xff\xff\xff\xff\xef?\xc4\xfcC\xc9\xe0j\x98\xbc\xfc\xff\xff\xff\xff\xff\xef?\xc4\xfcC\xc9\xe0j\x98\xbc\xfc\xff\xff\xff\xff\xff\xef?\xc4\xfcC\xc9\xe0j\x98\xbc\xfc\xff\xff\xff\xff\xff\xef?\xc4\xfcC\xc9\xe0j\x98\xbc\xfc\xff\xff\xff\xff\xff\xef?\xc4\xfcC\xc9\xe0j\x98\xbc\xfc\xff\xff\xff\xff\xff\xef?\xc4\xfcC\xc9\xe0j\x98\xbc\xfc\xff\xff\xff\xff\xff\xef?\xc4\xfcC\xc9\xe0j\x98\xbc\xfc\xff\xff\xff\xff\xff\xef?\xc4\xfcC\xc9\xe0j\x98\xbc\xfc\xff\xff\xff\xff\xff\xef?\xc4\xfcC\xc9\xe0j\x98\xbc\xfc\xff\xff\xff\xff\xff\xef?\xc4\xfcC\xc9\xe0j\x98\xbc\xfc\xff\xff\xff\xff\xff\xef?\xc4\xfcC\xc9\xe0j\x98\xbc\xfc\xff\xff\xff\xff\xff\xef?\xc4\xfcC\xc9\xe0j\x98\xbc\xfc\xff\xff\xff\xff\xff\xef?\xc4\xfcC\xc9\xe0j\x98\xbc\xfc\xff\xff\xff\xff\xff\xef?\xc4\xfcC\xc9\xe0j\x98\xbc\xfc\xff\xff\xff\xff\xff\xef?\xc4\xfcC\xc9\xe0j\x98\xbc\xfc\xff\xff\xff\xff\xff\xef?\xc4\xfcC\xc9\xe0j\x98\xbc\xfc\xff\xff\xff\xff\xff\xef?\xc4\xfcC\xc9\xe0j\x98\xbc\xfc\xff\xff\xff\xff\xff\xef?\xc4\xfcC\xc9\xe0j\x98\xbc\xfc\xff\xff\xff\xff\xff\xef?\xc4\xfcC\xc9\xe0j\x98\xbc\xfc\xff\xff\xff\xff\xff\xef?\xc4\xfcC\xc9\xe0j\x98\xbc\xfc\xff\xff\xff\xff\xff\xef?\xc4\xfcC\xc9\xe0j\x98\xbc\xfc\xff\xff\xff\xff\xff\xef?\xc4\xfcC\xc9\xe0j\x98\xbc\xfc\xff\xff\xff\xff\xff\xef?\xc4\xfcC\xc9\xe0j\x98\xbc\xfc\xff\xff\xff\xff\xff\xef?\xc4\xfcC\xc9\xe0j\x98\xbc\xfc\xff\xff\xff\xff\xff\xef?\xc4\xfcC\xc9\xe0j\x98\xbc\xfc\xff\xff\xff\xff\xff\xef?\xc4\xfcC\xc9\xe0j\x98\xbc\xfc\xff\xff\xff\xff\xff\xef?\xc4\xfcC\xc9\xe0j\x98\xbc\xfc\xff\xff\xff\xff\xff\xef?\xc4\xfcC\xc9\xe0j\x98\xbc\xfc\xff\xff\xff\xff\xff\xef?\xc4\xfcC\xc9\xe0j\x98\xbc\xfc\xff\xff\xff\xff\xff\xef?\xc4\xfcC\xc9\xe0j\x98\xbc\xfc\xff\xff\xff\xff\xff\xef?\xc4\xfcC\xc9\xe0j\x98\xbc\xfc\xff\xff\xff\xff\xff\xef?\xc4\xfcC\xc9\xe0j\x98\xbc\xfc\xff\xff\xff\xff\xff\xef?'
p94
tp95
bag2
(g3
(I0
tp96
g5
tp97
Rp98
(I1
(I2
I64
tp99
g12
I01
S'\xc4\xfcC\xc9\xe0j\x98\xbc\xfc\xff\xff\xff\xff\xff\xef?\xc4\xfcC\xc9\xe0j\x98\xbc\xfc\xff\xff\xff\xff\xff\xef?\xc4\xfcC\xc9\xe0j\x98\xbc\xfc\xff\xff\xff\xff\xff\xef?\xc4\xfcC\xc9\xe0j\x98\xbc\xfc\xff\xff\xff\xff\xff\xef?\xc4\xfcC\xc9\xe0j\x98\xbc\xfc\xff\xff\xff\xff\xff\xef?\xc4\xfcC\xc9\xe0j\x98\xbc\xfc\xff\xff\xff\xff\xff\xef?\xc4\xfcC\xc9\xe0j\x98\xbc\xfc\xff\xff\xff\xff\xff\xef?\xc4\xfcC\xc9\xe0j\x98\xbc\xfc\xff\xff\xff\xff\xff\xef?\xc4\xfcC\xc9\xe0j\x98\xbc\xfc\xff\xff\xff\xff\xff\xef?\xc4\xfcC\xc9\xe0j\x98\xbc\xfc\xff\xff\xff\xff\xff\xef?\xc4\xfcC\xc9\xe0j\x98\xbc\xfc\xff\xff\xff\xff\xff\xef?\xc4\xfcC\xc9\xe0j\x98\xbc\xfc\xff\xff\xff\xff\xff\xef?\xc4\xfcC\xc9\xe0j\x98\xbc\xfc\xff\xff\xff\xff\xff\xef?\xc4\xfcC\xc9\xe0j\x98\xbc\xfc\xff\xff\xff\xff\xff\xef?\xc4\xfcC\xc9\xe0j\x98\xbc\xfc\xff\xff\xff\xff\xff\xef?\xc4\xfcC\xc9\xe0j\x98\xbc\xfc\xff\xff\xff\xff\xff\xef?\xc4\xfcC\xc9\xe0j\x98\xbc\xfc\xff\xff\xff\xff\xff\xef?\xc4\xfcC\xc9\xe0j\x98\xbc\xfc\xff\xff\xff\xff\xff\xef?\xc4\xfcC\xc9\xe0j\x98\xbc\xfc\xff\xff\xff\xff\xff\xef?\xc4\xfcC\xc9\xe0j\x98\xbc\xfc\xff\xff\xff\xff\xff\xef?\xc4\xfcC\xc9\xe0j\x98\xbc\xfc\xff\xff\xff\xff\xff\xef?\xc4\xfcC\xc9\xe0j\x98\xbc\xfc\xff\xff\xff\xff\xff\xef?\xc4\xfcC\xc9\xe0j\x98\xbc\xfc\xff\xff\xff\xff\xff\xef?\xc4\xfcC\xc9\xe0j\x98\xbc\xfc\xff\xff\xff\xff\xff\xef?\xc4\xfcC\xc9\xe0j\x98\xbc\xfc\xff\xff\xff\xff\xff\xef?\xc4\xfcC\xc9\xe0j\x98\xbc\xfc\xff\xff\xff\xff\xff\xef?\xc4\xfcC\xc9\xe0j\x98\xbc\xfc\xff\xff\xff\xff\xff\xef?\xc4\xfcC\xc9\xe0j\x98\xbc\xfc\xff\xff\xff\xff\xff\xef?\xc4\xfcC\xc9\xe0j\x98\xbc\xfc\xff\xff\xff\xff\xff\xef?\xc4\xfcC\xc9\xe0j\x98\xbc\xfc\xff\xff\xff\xff\xff\xef?\xc4\xfcC\xc9\xe0j\x98\xbc\xfc\xff\xff\xff\xff\xff\xef?\xc4\xfcC\xc9\xe0j\x98\xbc\xfc\xff\xff\xff\xff\xff\xef?\xc4\xfcC\xc9\xe0j\x98\xbc\xfc\xff\xff\xff\xff\xff\xef?\xc4\xfcC\xc9\xe0j\x98\xbc\xfc\xff\xff\xff\xff\xff\xef?\xc4\xfcC\xc9\xe0j\x98\xbc\xfc\xff\xff\xff\xff\xff\xef?\xc4\xfcC\xc9\xe0j\x98\xbc\xfc\xff\xff\xff\xff\xff\xef?\xc4\xfcC\xc9\xe0j\x98\xbc\xfc\xff\xff\xff\xff\xff\xef?\xc4\xfcC\xc9\xe0j\x98\xbc\xfc\xff\xff\xff\xff\xff\xef?\xc4\xfcC\xc9\xe0j\x98\xbc\xfc\xff\xff\xff\xff\xff\xef?\xc4\xfcC\xc9\xe0j\x98\xbc\xfc\xff\xff\xff\xff\xff\xef?\xc4\xfcC\xc9\xe0j\x98\xbc\xfc\xff\xff\xff\xff\xff\xef?\xc4\xfcC\xc9\xe0j\x98\xbc\xfc\xff\xff\xff\xff\xff\xef?\xc4\xfcC\xc9\xe0j\x98\xbc\xfc\xff\xff\xff\xff\xff\xef?\xc4\xfcC\xc9\xe0j\x98\xbc\xfc\xff\xff\xff\xff\xff\xef?\xc4\xfcC\xc9\xe0j\x98\xbc\xfc\xff\xff\xff\xff\xff\xef?\xc4\xfcC\xc9\xe0j\x98\xbc\xfc\xff\xff\xff\xff\xff\xef?\xc4\xfcC\xc9\xe0j\x98\xbc\xfc\xff\xff\xff\xff\xff\xef?\xc4\xfcC\xc9\xe0j\x98\xbc\xfc\xff\xff\xff\xff\xff\xef?\xc4\xfcC\xc9\xe0j\x98\xbc\xfc\xff\xff\xff\xff\xff\xef?\xc4\xfcC\xc9\xe0j\x98\xbc\xfc\xff\xff\xff\xff\xff\xef?\xc4\xfcC\xc9\xe0j\x98\xbc\xfc\xff\xff\xff\xff\xff\xef?\xc4\xfcC\xc9\xe0j\x98\xbc\xfc\xff\xff\xff\xff\xff\xef?\xc4\xfcC\xc9\xe0j\x98\xbc\xfc\xff\xff\xff\xff\xff\xef?\xc4\xfcC\xc9\xe0j\x98\xbc\xfc\xff\xff\xff\xff\xff\xef?\xc4\xfcC\xc9\xe0j\x98\xbc\xfc\xff\xff\xff\xff\xff\xef?\xc4\xfcC\xc9\xe0j\x98\xbc\xfc\xff\xff\xff\xff\xff\xef?\xc4\xfcC\xc9\xe0j\x98\xbc\xfc\xff\xff\xff\xff\xff\xef?\xc4\xfcC\xc9\xe0j\x98\xbc\xfc\xff\xff\xff\xff\xff\xef?\xc4\xfcC\xc9\xe0j\x98\xbc\xfc\xff\xff\xff\xff\xff\xef?\xc4\xfcC\xc9\xe0j\x98\xbc\xfc\xff\xff\xff\xff\xff\xef?\xc4\xfcC\xc9\xe0j\x98\xbc\xfc\xff\xff\xff\xff\xff\xef?\xc4\xfcC\xc9\xe0j\x98\xbc\xfc\xff\xff\xff\xff\xff\xef?\xc4\xfcC\xc9\xe0j\x98\xbc\xfc\xff\xff\xff\xff\xff\xef?\xc4\xfcC\xc9\xe0j\x98\xbc\xfc\xff\xff\xff\xff\xff\xef?'
p100
tp101
bag2
(g3
(I0
tp102
g5
tp103
Rp104
(I1
(I2
I128
tp105
g12
I01
S'\xc4\xfcC\xc9\xe0j\x98\xbc\xfc\xff\xff\xff\xff\xff\xef?\xc4\xfcC\xc9\xe0j\x98\xbc\xfc\xff\xff\xff\xff\xff\xef?\xc4\xfcC\xc9\xe0j\x98\xbc\xfc\xff\xff\xff\xff\xff\xef?\xc4\xfcC\xc9\xe0j\x98\xbc\xfc\xff\xff\xff\xff\xff\xef?\xc4\xfcC\xc9\xe0j\x98\xbc\xfc\xff\xff\xff\xff\xff\xef?\xc4\xfcC\xc9\xe0j\x98\xbc\xfc\xff\xff\xff\xff\xff\xef?\xc4\xfcC\xc9\xe0j\x98\xbc\xfc\xff\xff\xff\xff\xff\xef?\xc4\xfcC\xc9\xe0j\x98\xbc\xfc\xff\xff\xff\xff\xff\xef?\xc4\xfcC\xc9\xe0j\x98\xbc\xfc\xff\xff\xff\xff\xff\xef?\xc4\xfcC\xc9\xe0j\x98\xbc\xfc\xff\xff\xff\xff\xff\xef?\xc4\xfcC\xc9\xe0j\x98\xbc\xfc\xff\xff\xff\xff\xff\xef?\xc4\xfcC\xc9\xe0j\x98\xbc\xfc\xff\xff\xff\xff\xff\xef?\xc4\xfcC\xc9\xe0j\x98\xbc\xfc\xff\xff\xff\xff\xff\xef?\xc4\xfcC\xc9\xe0j\x98\xbc\xfc\xff\xff\xff\xff\xff\xef?\xc4\xfcC\xc9\xe0j\x98\xbc\xfc\xff\xff\xff\xff\xff\xef?\xc4\xfcC\xc9\xe0j\x98\xbc\xfc\xff\xff\xff\xff\xff\xef?\xc4\xfcC\xc9\xe0j\x98\xbc\xfc\xff\xff\xff\xff\xff\xef?\xc4\xfcC\xc9\xe0j\x98\xbc\xfc\xff\xff\xff\xff\xff\xef?\xc4\xfcC\xc9\xe0j\x98\xbc\xfc\xff\xff\xff\xff\xff\xef?\xc4\xfcC\xc9\xe0j\x98\xbc\xfc\xff\xff\xff\xff\xff\xef?\xc4\xfcC\xc9\xe0j\x98\xbc\xfc\xff\xff\xff\xff\xff\xef?\xc4\xfcC\xc9\xe0j\x98\xbc\xfc\xff\xff\xff\xff\xff\xef?\xc4\xfcC\xc9\xe0j\x98\xbc\xfc\xff\xff\xff\xff\xff\xef?\xc4\xfcC\xc9\xe0j\x98\xbc\xfc\xff\xff\xff\xff\xff\xef?\xc4\xfcC\xc9\xe0j\x98\xbc\xfc\xff\xff\xff\xff\xff\xef?\xc4\xfcC\xc9\xe0j\x98\xbc\xfc\xff\xff\xff\xff\xff\xef?\xc4\xfcC\xc9\xe0j\x98\xbc\xfc\xff\xff\xff\xff\xff\xef?\xc4\xfcC\xc9\xe0j\x98\xbc\xfc\xff\xff\xff\xff\xff\xef?\xc4\xfcC\xc9\xe0j\x98\xbc\xfc\xff\xff\xff\xff\xff\xef?\xc4\xfcC\xc9\xe0j\x98\xbc\xfc\xff\xff\xff\xff\xff\xef?\xc4\xfcC\xc9\xe0j\x98\xbc\xfc\xff\xff\xff\xff\xff\xef?\xc4\xfcC\xc9\xe0j\x98\xbc\xfc\xff\xff\xff\xff\xff\xef?\xc4\xfcC\xc9\xe0j\x98\xbc\xfc\xff\xff\xff\xff\xff\xef?\xc4\xfcC\xc9\xe0j\x98\xbc\xfc\xff\xff\xff\xff\xff\xef?\xc4\xfcC\xc9\xe0j\x98\xbc\xfc\xff\xff\xff\xff\xff\xef?\xc4\xfcC\xc9\xe0j\x98\xbc\xfc\xff\xff\xff\xff\xff\xef?\xc4\xfcC\xc9\xe0j\x98\xbc\xfc\xff\xff\xff\xff\xff\xef?\xc4\xfcC\xc9\xe0j\x98\xbc\xfc\xff\xff\xff\xff\xff\xef?\xc4\xfcC\xc9\xe0j\x98\xbc\xfc\xff\xff\xff\xff\xff\xef?\xc4\xfcC\xc9\xe0j\x98\xbc\xfc\xff\xff\xff\xff\xff\xef?\xc4\xfcC\xc9\xe0j\x98\xbc\xfc\xff\xff\xff\xff\xff\xef?\xc4\xfcC\xc9\xe0j\x98\xbc\xfc\xff\xff\xff\xff\xff\xef?\xc4\xfcC\xc9\xe0j\x98\xbc\xfc\xff\xff\xff\xff\xff\xef?\xc4\xfcC\xc9\xe0j\x98\xbc\xfc\xff\xff\xff\xff\xff\xef?\xc4\xfcC\xc9\xe0j\x98\xbc\xfc\xff\xff\xff\xff\xff\xef?\xc4\xfcC\xc9\xe0j\x98\xbc\xfc\xff\xff\xff\xff\xff\xef?\xc4\xfcC\xc9\xe0j\x98\xbc\xfc\xff\xff\xff\xff\xff\xef?\xc4\xfcC\xc9\xe0j\x98\xbc\xfc\xff\xff\xff\xff\xff\xef?\xc4\xfcC\xc9\xe0j\x98\xbc\xfc\xff\xff\xff\xff\xff\xef?\xc4\xfcC\xc9\xe0j\x98\xbc\xfc\xff\xff\xff\xff\xff\xef?\xc4\xfcC\xc9\xe0j\x98\xbc\xfc\xff\xff\xff\xff\xff\xef?\xc4\xfcC\xc9\xe0j\x98\xbc\xfc\xff\xff\xff\xff\xff\xef?\xc4\xfcC\xc9\xe0j\x98\xbc\xfc\xff\xff\xff\xff\xff\xef?\xc4\xfcC\xc9\xe0j\x98\xbc\xfc\xff\xff\xff\xff\xff\xef?\xc4\xfcC\xc9\xe0j\x98\xbc\xfc\xff\xff\xff\xff\xff\xef?\xc4\xfcC\xc9\xe0j\x98\xbc\xfc\xff\xff\xff\xff\xff\xef?\xc4\xfcC\xc9\xe0j\x98\xbc\xfc\xff\xff\xff\xff\xff\xef?\xc4\xfcC\xc9\xe0j\x98\xbc\xfc\xff\xff\xff\xff\xff\xef?\xc4\xfcC\xc9\xe0j\x98\xbc\xfc\xff\xff\xff\xff\xff\xef?\xc4\xfcC\xc9\xe0j\x98\xbc\xfc\xff\xff\xff\xff\xff\xef?\xc4\xfcC\xc9\xe0j\x98\xbc\xfc\xff\xff\xff\xff\xff\xef?\xc4\xfcC\xc9\xe0j\x98\xbc\xfc\xff\xff\xff\xff\xff\xef?\xc4\xfcC\xc9\xe0j\x98\xbc\xfc\xff\xff\xff\xff\xff\xef?\xc4\xfcC\xc9\xe0j\x98\xbc\xfc\xff\xff\xff\xff\xff\xef?\xc4\xfcC\xc9\xe0j\x98\xbc\xfc\xff\xff\xff\xff\xff\xef?\xc4\xfcC\xc9\xe0j\x98\xbc\xfc\xff\xff\xff\xff\xff\xef?\xc4\xfcC\xc9\xe0j\x98\xbc\xfc\xff\xff\xff\xff\xff\xef?\xc4\xfcC\xc9\xe0j\x98\xbc\xfc\xff\xff\xff\xff\xff\xef?\xc4\xfcC\xc9\xe0j\x98\xbc\xfc\xff\xff\xff\xff\xff\xef?\xc4\xfcC\xc9\xe0j\x98\xbc\xfc\xff\xff\xff\xff\xff\xef?\xc4\xfcC\xc9\xe0j\x98\xbc\xfc\xff\xff\xff\xff\xff\xef?\xc4\xfcC\xc9\xe0j\x98\xbc\xfc\xff\xff\xff\xff\xff\xef?\xc4\xfcC\xc9\xe0j\x98\xbc\xfc\xff\xff\xff\xff\xff\xef?\xc4\xfcC\xc9\xe0j\x98\xbc\xfc\xff\xff\xff\xff\xff\xef?\xc4\xfcC\xc9\xe0j\x98\xbc\xfc\xff\xff\xff\xff\xff\xef?\xc4\xfcC\xc9\xe0j\x98\xbc\xfc\xff\xff\xff\xff\xff\xef?\xc4\xfcC\xc9\xe0j\x98\xbc\xfc\xff\xff\xff\xff\xff\xef?\xc4\xfcC\xc9\xe0j\x98\xbc\xfc\xff\xff\xff\xff\xff\xef?\xc4\xfcC\xc9\xe0j\x98\xbc\xfc\xff\xff\xff\xff\xff\xef?\xc4\xfcC\xc9\xe0j\x98\xbc\xfc\xff\xff\xff\xff\xff\xef?\xc4\xfcC\xc9\xe0j\x98\xbc\xfc\xff\xff\xff\xff\xff\xef?\xc4\xfcC\xc9\xe0j\x98\xbc\xfc\xff\xff\xff\xff\xff\xef?\xc4\xfcC\xc9\xe0j\x98\xbc\xfc\xff\xff\xff\xff\xff\xef?\xc4\xfcC\xc9\xe0j\x98\xbc\xfc\xff\xff\xff\xff\xff\xef?\xc4\xfcC\xc9\xe0j\x98\xbc\xfc\xff\xff\xff\xff\xff\xef?\xc4\xfcC\xc9\xe0j\x98\xbc\xfc\xff\xff\xff\xff\xff\xef?\xc4\xfcC\xc9\xe0j\x98\xbc\xfc\xff\xff\xff\xff\xff\xef?\xc4\xfcC\xc9\xe0j\x98\xbc\xfc\xff\xff\xff\xff\xff\xef?\xc4\xfcC\xc9\xe0j\x98\xbc\xfc\xff\xff\xff\xff\xff\xef?\xc4\xfcC\xc9\xe0j\x98\xbc\xfc\xff\xff\xff\xff\xff\xef?\xc4\xfcC\xc9\xe0j\x98\xbc\xfc\xff\xff\xff\xff\xff\xef?\xc4\xfcC\xc9\xe0j\x98\xbc\xfc\xff\xff\xff\xff\xff\xef?\xc4\xfcC\xc9\xe0j\x98\xbc\xfc\xff\xff\xff\xff\xff\xef?\xc4\xfcC\xc9\xe0j\x98\xbc\xfc\xff\xff\xff\xff\xff\xef?\xc4\xfcC\xc9\xe0j\x98\xbc\xfc\xff\xff\xff\xff\xff\xef?\xc4\xfcC\xc9\xe0j\x98\xbc\xfc\xff\xff\xff\xff\xff\xef?\xc4\xfcC\xc9\xe0j\x98\xbc\xfc\xff\xff\xff\xff\xff\xef?\xc4\xfcC\xc9\xe0j\x98\xbc\xfc\xff\xff\xff\xff\xff\xef?\xc4\xfcC\xc9\xe0j\x98\xbc\xfc\xff\xff\xff\xff\xff\xef?\xc4\xfcC\xc9\xe0j\x98\xbc\xfc\xff\xff\xff\xff\xff\xef?\xc4\xfcC\xc9\xe0j\x98\xbc\xfc\xff\xff\xff\xff\xff\xef?\xc4\xfcC\xc9\xe0j\x98\xbc\xfc\xff\xff\xff\xff\xff\xef?\xc4\xfcC\xc9\xe0j\x98\xbc\xfc\xff\xff\xff\xff\xff\xef?\xc4\xfcC\xc9\xe0j\x98\xbc\xfc\xff\xff\xff\xff\xff\xef?\xc4\xfcC\xc9\xe0j\x98\xbc\xfc\xff\xff\xff\xff\xff\xef?\xc4\xfcC\xc9\xe0j\x98\xbc\xfc\xff\xff\xff\xff\xff\xef?\xc4\xfcC\xc9\xe0j\x98\xbc\xfc\xff\xff\xff\xff\xff\xef?\xc4\xfcC\xc9\xe0j\x98\xbc\xfc\xff\xff\xff\xff\xff\xef?\xc4\xfcC\xc9\xe0j\x98\xbc\xfc\xff\xff\xff\xff\xff\xef?\xc4\xfcC\xc9\xe0j\x98\xbc\xfc\xff\xff\xff\xff\xff\xef?\xc4\xfcC\xc9\xe0j\x98\xbc\xfc\xff\xff\xff\xff\xff\xef?\xc4\xfcC\xc9\xe0j\x98\xbc\xfc\xff\xff\xff\xff\xff\xef?\xc4\xfcC\xc9\xe0j\x98\xbc\xfc\xff\xff\xff\xff\xff\xef?\xc4\xfcC\xc9\xe0j\x98\xbc\xfc\xff\xff\xff\xff\xff\xef?\xc4\xfcC\xc9\xe0j\x98\xbc\xfc\xff\xff\xff\xff\xff\xef?\xc4\xfcC\xc9\xe0j\x98\xbc\xfc\xff\xff\xff\xff\xff\xef?\xc4\xfcC\xc9\xe0j\x98\xbc\xfc\xff\xff\xff\xff\xff\xef?\xc4\xfcC\xc9\xe0j\x98\xbc\xfc\xff\xff\xff\xff\xff\xef?\xc4\xfcC\xc9\xe0j\x98\xbc\xfc\xff\xff\xff\xff\xff\xef?\xc4\xfcC\xc9\xe0j\x98\xbc\xfc\xff\xff\xff\xff\xff\xef?\xc4\xfcC\xc9\xe0j\x98\xbc\xfc\xff\xff\xff\xff\xff\xef?\xc4\xfcC\xc9\xe0j\x98\xbc\xfc\xff\xff\xff\xff\xff\xef?\xc4\xfcC\xc9\xe0j\x98\xbc\xfc\xff\xff\xff\xff\xff\xef?\xc4\xfcC\xc9\xe0j\x98\xbc\xfc\xff\xff\xff\xff\xff\xef?\xc4\xfcC\xc9\xe0j\x98\xbc\xfc\xff\xff\xff\xff\xff\xef?\xc4\xfcC\xc9\xe0j\x98\xbc\xfc\xff\xff\xff\xff\xff\xef?\xc4\xfcC\xc9\xe0j\x98\xbc\xfc\xff\xff\xff\xff\xff\xef?\xc4\xfcC\xc9\xe0j\x98\xbc\xfc\xff\xff\xff\xff\xff\xef?'
p106
tp107
bag2
(g3
(I0
tp108
g5
tp109
Rp110
(I1
(I2
I128
tp111
g12
I01
S'\xc4\xfcC\xc9\xe0j\x98\xbc\xfc\xff\xff\xff\xff\xff\xef?\xc4\xfcC\xc9\xe0j\x98\xbc\xfc\xff\xff\xff\xff\xff\xef?\xc4\xfcC\xc9\xe0j\x98\xbc\xfc\xff\xff\xff\xff\xff\xef?\xc4\xfcC\xc9\xe0j\x98\xbc\xfc\xff\xff\xff\xff\xff\xef?\xc4\xfcC\xc9\xe0j\x98\xbc\xfc\xff\xff\xff\xff\xff\xef?\xc4\xfcC\xc9\xe0j\x98\xbc\xfc\xff\xff\xff\xff\xff\xef?\xc4\xfcC\xc9\xe0j\x98\xbc\xfc\xff\xff\xff\xff\xff\xef?\xc4\xfcC\xc9\xe0j\x98\xbc\xfc\xff\xff\xff\xff\xff\xef?\xc4\xfcC\xc9\xe0j\x98\xbc\xfc\xff\xff\xff\xff\xff\xef?\xc4\xfcC\xc9\xe0j\x98\xbc\xfc\xff\xff\xff\xff\xff\xef?\xc4\xfcC\xc9\xe0j\x98\xbc\xfc\xff\xff\xff\xff\xff\xef?\xc4\xfcC\xc9\xe0j\x98\xbc\xfc\xff\xff\xff\xff\xff\xef?\xc4\xfcC\xc9\xe0j\x98\xbc\xfc\xff\xff\xff\xff\xff\xef?\xc4\xfcC\xc9\xe0j\x98\xbc\xfc\xff\xff\xff\xff\xff\xef?\xc4\xfcC\xc9\xe0j\x98\xbc\xfc\xff\xff\xff\xff\xff\xef?\xc4\xfcC\xc9\xe0j\x98\xbc\xfc\xff\xff\xff\xff\xff\xef?\xc4\xfcC\xc9\xe0j\x98\xbc\xfc\xff\xff\xff\xff\xff\xef?\xc4\xfcC\xc9\xe0j\x98\xbc\xfc\xff\xff\xff\xff\xff\xef?\xc4\xfcC\xc9\xe0j\x98\xbc\xfc\xff\xff\xff\xff\xff\xef?\xc4\xfcC\xc9\xe0j\x98\xbc\xfc\xff\xff\xff\xff\xff\xef?\xc4\xfcC\xc9\xe0j\x98\xbc\xfc\xff\xff\xff\xff\xff\xef?\xc4\xfcC\xc9\xe0j\x98\xbc\xfc\xff\xff\xff\xff\xff\xef?\xc4\xfcC\xc9\xe0j\x98\xbc\xfc\xff\xff\xff\xff\xff\xef?\xc4\xfcC\xc9\xe0j\x98\xbc\xfc\xff\xff\xff\xff\xff\xef?\xc4\xfcC\xc9\xe0j\x98\xbc\xfc\xff\xff\xff\xff\xff\xef?\xc4\xfcC\xc9\xe0j\x98\xbc\xfc\xff\xff\xff\xff\xff\xef?\xc4\xfcC\xc9\xe0j\x98\xbc\xfc\xff\xff\xff\xff\xff\xef?\xc4\xfcC\xc9\xe0j\x98\xbc\xfc\xff\xff\xff\xff\xff\xef?\xc4\xfcC\xc9\xe0j\x98\xbc\xfc\xff\xff\xff\xff\xff\xef?\xc4\xfcC\xc9\xe0j\x98\xbc\xfc\xff\xff\xff\xff\xff\xef?\xc4\xfcC\xc9\xe0j\x98\xbc\xfc\xff\xff\xff\xff\xff\xef?\xc4\xfcC\xc9\xe0j\x98\xbc\xfc\xff\xff\xff\xff\xff\xef?\xc4\xfcC\xc9\xe0j\x98\xbc\xfc\xff\xff\xff\xff\xff\xef?\xc4\xfcC\xc9\xe0j\x98\xbc\xfc\xff\xff\xff\xff\xff\xef?\xc4\xfcC\xc9\xe0j\x98\xbc\xfc\xff\xff\xff\xff\xff\xef?\xc4\xfcC\xc9\xe0j\x98\xbc\xfc\xff\xff\xff\xff\xff\xef?\xc4\xfcC\xc9\xe0j\x98\xbc\xfc\xff\xff\xff\xff\xff\xef?\xc4\xfcC\xc9\xe0j\x98\xbc\xfc\xff\xff\xff\xff\xff\xef?\xc4\xfcC\xc9\xe0j\x98\xbc\xfc\xff\xff\xff\xff\xff\xef?\xc4\xfcC\xc9\xe0j\x98\xbc\xfc\xff\xff\xff\xff\xff\xef?\xc4\xfcC\xc9\xe0j\x98\xbc\xfc\xff\xff\xff\xff\xff\xef?\xc4\xfcC\xc9\xe0j\x98\xbc\xfc\xff\xff\xff\xff\xff\xef?\xc4\xfcC\xc9\xe0j\x98\xbc\xfc\xff\xff\xff\xff\xff\xef?\xc4\xfcC\xc9\xe0j\x98\xbc\xfc\xff\xff\xff\xff\xff\xef?\xc4\xfcC\xc9\xe0j\x98\xbc\xfc\xff\xff\xff\xff\xff\xef?\xc4\xfcC\xc9\xe0j\x98\xbc\xfc\xff\xff\xff\xff\xff\xef?\xc4\xfcC\xc9\xe0j\x98\xbc\xfc\xff\xff\xff\xff\xff\xef?\xc4\xfcC\xc9\xe0j\x98\xbc\xfc\xff\xff\xff\xff\xff\xef?\xc4\xfcC\xc9\xe0j\x98\xbc\xfc\xff\xff\xff\xff\xff\xef?\xc4\xfcC\xc9\xe0j\x98\xbc\xfc\xff\xff\xff\xff\xff\xef?\xc4\xfcC\xc9\xe0j\x98\xbc\xfc\xff\xff\xff\xff\xff\xef?\xc4\xfcC\xc9\xe0j\x98\xbc\xfc\xff\xff\xff\xff\xff\xef?\xc4\xfcC\xc9\xe0j\x98\xbc\xfc\xff\xff\xff\xff\xff\xef?\xc4\xfcC\xc9\xe0j\x98\xbc\xfc\xff\xff\xff\xff\xff\xef?\xc4\xfcC\xc9\xe0j\x98\xbc\xfc\xff\xff\xff\xff\xff\xef?\xc4\xfcC\xc9\xe0j\x98\xbc\xfc\xff\xff\xff\xff\xff\xef?\xc4\xfcC\xc9\xe0j\x98\xbc\xfc\xff\xff\xff\xff\xff\xef?\xc4\xfcC\xc9\xe0j\x98\xbc\xfc\xff\xff\xff\xff\xff\xef?\xc4\xfcC\xc9\xe0j\x98\xbc\xfc\xff\xff\xff\xff\xff\xef?\xc4\xfcC\xc9\xe0j\x98\xbc\xfc\xff\xff\xff\xff\xff\xef?\xc4\xfcC\xc9\xe0j\x98\xbc\xfc\xff\xff\xff\xff\xff\xef?\xc4\xfcC\xc9\xe0j\x98\xbc\xfc\xff\xff\xff\xff\xff\xef?\xc4\xfcC\xc9\xe0j\x98\xbc\xfc\xff\xff\xff\xff\xff\xef?\xc4\xfcC\xc9\xe0j\x98\xbc\xfc\xff\xff\xff\xff\xff\xef?\xc4\xfcC\xc9\xe0j\x98\xbc\xfc\xff\xff\xff\xff\xff\xef?\xc4\xfcC\xc9\xe0j\x98\xbc\xfc\xff\xff\xff\xff\xff\xef?\xc4\xfcC\xc9\xe0j\x98\xbc\xfc\xff\xff\xff\xff\xff\xef?\xc4\xfcC\xc9\xe0j\x98\xbc\xfc\xff\xff\xff\xff\xff\xef?\xc4\xfcC\xc9\xe0j\x98\xbc\xfc\xff\xff\xff\xff\xff\xef?\xc4\xfcC\xc9\xe0j\x98\xbc\xfc\xff\xff\xff\xff\xff\xef?\xc4\xfcC\xc9\xe0j\x98\xbc\xfc\xff\xff\xff\xff\xff\xef?\xc4\xfcC\xc9\xe0j\x98\xbc\xfc\xff\xff\xff\xff\xff\xef?\xc4\xfcC\xc9\xe0j\x98\xbc\xfc\xff\xff\xff\xff\xff\xef?\xc4\xfcC\xc9\xe0j\x98\xbc\xfc\xff\xff\xff\xff\xff\xef?\xc4\xfcC\xc9\xe0j\x98\xbc\xfc\xff\xff\xff\xff\xff\xef?\xc4\xfcC\xc9\xe0j\x98\xbc\xfc\xff\xff\xff\xff\xff\xef?\xc4\xfcC\xc9\xe0j\x98\xbc\xfc\xff\xff\xff\xff\xff\xef?\xc4\xfcC\xc9\xe0j\x98\xbc\xfc\xff\xff\xff\xff\xff\xef?\xc4\xfcC\xc9\xe0j\x98\xbc\xfc\xff\xff\xff\xff\xff\xef?\xc4\xfcC\xc9\xe0j\x98\xbc\xfc\xff\xff\xff\xff\xff\xef?\xc4\xfcC\xc9\xe0j\x98\xbc\xfc\xff\xff\xff\xff\xff\xef?\xc4\xfcC\xc9\xe0j\x98\xbc\xfc\xff\xff\xff\xff\xff\xef?\xc4\xfcC\xc9\xe0j\x98\xbc\xfc\xff\xff\xff\xff\xff\xef?\xc4\xfcC\xc9\xe0j\x98\xbc\xfc\xff\xff\xff\xff\xff\xef?\xc4\xfcC\xc9\xe0j\x98\xbc\xfc\xff\xff\xff\xff\xff\xef?\xc4\xfcC\xc9\xe0j\x98\xbc\xfc\xff\xff\xff\xff\xff\xef?\xc4\xfcC\xc9\xe0j\x98\xbc\xfc\xff\xff\xff\xff\xff\xef?\xc4\xfcC\xc9\xe0j\x98\xbc\xfc\xff\xff\xff\xff\xff\xef?\xc4\xfcC\xc9\xe0j\x98\xbc\xfc\xff\xff\xff\xff\xff\xef?\xc4\xfcC\xc9\xe0j\x98\xbc\xfc\xff\xff\xff\xff\xff\xef?\xc4\xfcC\xc9\xe0j\x98\xbc\xfc\xff\xff\xff\xff\xff\xef?\xc4\xfcC\xc9\xe0j\x98\xbc\xfc\xff\xff\xff\xff\xff\xef?\xc4\xfcC\xc9\xe0j\x98\xbc\xfc\xff\xff\xff\xff\xff\xef?\xc4\xfcC\xc9\xe0j\x98\xbc\xfc\xff\xff\xff\xff\xff\xef?\xc4\xfcC\xc9\xe0j\x98\xbc\xfc\xff\xff\xff\xff\xff\xef?\xc4\xfcC\xc9\xe0j\x98\xbc\xfc\xff\xff\xff\xff\xff\xef?\xc4\xfcC\xc9\xe0j\x98\xbc\xfc\xff\xff\xff\xff\xff\xef?\xc4\xfcC\xc9\xe0j\x98\xbc\xfc\xff\xff\xff\xff\xff\xef?\xc4\xfcC\xc9\xe0j\x98\xbc\xfc\xff\xff\xff\xff\xff\xef?\xc4\xfcC\xc9\xe0j\x98\xbc\xfc\xff\xff\xff\xff\xff\xef?\xc4\xfcC\xc9\xe0j\x98\xbc\xfc\xff\xff\xff\xff\xff\xef?\xc4\xfcC\xc9\xe0j\x98\xbc\xfc\xff\xff\xff\xff\xff\xef?\xc4\xfcC\xc9\xe0j\x98\xbc\xfc\xff\xff\xff\xff\xff\xef?\xc4\xfcC\xc9\xe0j\x98\xbc\xfc\xff\xff\xff\xff\xff\xef?\xc4\xfcC\xc9\xe0j\x98\xbc\xfc\xff\xff\xff\xff\xff\xef?\xc4\xfcC\xc9\xe0j\x98\xbc\xfc\xff\xff\xff\xff\xff\xef?\xc4\xfcC\xc9\xe0j\x98\xbc\xfc\xff\xff\xff\xff\xff\xef?\xc4\xfcC\xc9\xe0j\x98\xbc\xfc\xff\xff\xff\xff\xff\xef?\xc4\xfcC\xc9\xe0j\x98\xbc\xfc\xff\xff\xff\xff\xff\xef?\xc4\xfcC\xc9\xe0j\x98\xbc\xfc\xff\xff\xff\xff\xff\xef?\xc4\xfcC\xc9\xe0j\x98\xbc\xfc\xff\xff\xff\xff\xff\xef?\xc4\xfcC\xc9\xe0j\x98\xbc\xfc\xff\xff\xff\xff\xff\xef?\xc4\xfcC\xc9\xe0j\x98\xbc\xfc\xff\xff\xff\xff\xff\xef?\xc4\xfcC\xc9\xe0j\x98\xbc\xfc\xff\xff\xff\xff\xff\xef?\xc4\xfcC\xc9\xe0j\x98\xbc\xfc\xff\xff\xff\xff\xff\xef?\xc4\xfcC\xc9\xe0j\x98\xbc\xfc\xff\xff\xff\xff\xff\xef?\xc4\xfcC\xc9\xe0j\x98\xbc\xfc\xff\xff\xff\xff\xff\xef?\xc4\xfcC\xc9\xe0j\x98\xbc\xfc\xff\xff\xff\xff\xff\xef?\xc4\xfcC\xc9\xe0j\x98\xbc\xfc\xff\xff\xff\xff\xff\xef?\xc4\xfcC\xc9\xe0j\x98\xbc\xfc\xff\xff\xff\xff\xff\xef?\xc4\xfcC\xc9\xe0j\x98\xbc\xfc\xff\xff\xff\xff\xff\xef?\xc4\xfcC\xc9\xe0j\x98\xbc\xfc\xff\xff\xff\xff\xff\xef?\xc4\xfcC\xc9\xe0j\x98\xbc\xfc\xff\xff\xff\xff\xff\xef?\xc4\xfcC\xc9\xe0j\x98\xbc\xfc\xff\xff\xff\xff\xff\xef?\xc4\xfcC\xc9\xe0j\x98\xbc\xfc\xff\xff\xff\xff\xff\xef?\xc4\xfcC\xc9\xe0j\x98\xbc\xfc\xff\xff\xff\xff\xff\xef?\xc4\xfcC\xc9\xe0j\x98\xbc\xfc\xff\xff\xff\xff\xff\xef?\xc4\xfcC\xc9\xe0j\x98\xbc\xfc\xff\xff\xff\xff\xff\xef?'
p112
tp113
bag2
(g3
(I0
tp114
g5
tp115
Rp116
(I1
(I2
I247
tp117
g12
I01
S'\xc4\xfcC\xc9\xe0j\x98\xbc\xfc\xff\xff\xff\xff\xff\xef?\xc4\xfcC\xc9\xe0j\x98\xbc\xfc\xff\xff\xff\xff\xff\xef?\xc4\xfcC\xc9\xe0j\x98\xbc\xfc\xff\xff\xff\xff\xff\xef?\xc4\xfcC\xc9\xe0j\x98\xbc\xfc\xff\xff\xff\xff\xff\xef?\xc4\xfcC\xc9\xe0j\x98\xbc\xfc\xff\xff\xff\xff\xff\xef?\xc4\xfcC\xc9\xe0j\x98\xbc\xfc\xff\xff\xff\xff\xff\xef?\xc4\xfcC\xc9\xe0j\x98\xbc\xfc\xff\xff\xff\xff\xff\xef?\xc4\xfcC\xc9\xe0j\x98\xbc\xfc\xff\xff\xff\xff\xff\xef?\xc4\xfcC\xc9\xe0j\x98\xbc\xfc\xff\xff\xff\xff\xff\xef?\xc4\xfcC\xc9\xe0j\x98\xbc\xfc\xff\xff\xff\xff\xff\xef?\xc4\xfcC\xc9\xe0j\x98\xbc\xfc\xff\xff\xff\xff\xff\xef?\xc4\xfcC\xc9\xe0j\x98\xbc\xfc\xff\xff\xff\xff\xff\xef?\xc4\xfcC\xc9\xe0j\x98\xbc\xfc\xff\xff\xff\xff\xff\xef?\xc4\xfcC\xc9\xe0j\x98\xbc\xfc\xff\xff\xff\xff\xff\xef?\xc4\xfcC\xc9\xe0j\x98\xbc\xfc\xff\xff\xff\xff\xff\xef?\xc4\xfcC\xc9\xe0j\x98\xbc\xfc\xff\xff\xff\xff\xff\xef?\xc4\xfcC\xc9\xe0j\x98\xbc\xfc\xff\xff\xff\xff\xff\xef?\xc4\xfcC\xc9\xe0j\x98\xbc\xfc\xff\xff\xff\xff\xff\xef?\xc4\xfcC\xc9\xe0j\x98\xbc\xfc\xff\xff\xff\xff\xff\xef?\xc4\xfcC\xc9\xe0j\x98\xbc\xfc\xff\xff\xff\xff\xff\xef?\xc4\xfcC\xc9\xe0j\x98\xbc\xfc\xff\xff\xff\xff\xff\xef?\xc4\xfcC\xc9\xe0j\x98\xbc\xfc\xff\xff\xff\xff\xff\xef?\xc4\xfcC\xc9\xe0j\x98\xbc\xfc\xff\xff\xff\xff\xff\xef?\xc4\xfcC\xc9\xe0j\x98\xbc\xfc\xff\xff\xff\xff\xff\xef?\xc4\xfcC\xc9\xe0j\x98\xbc\xfc\xff\xff\xff\xff\xff\xef?\xc4\xfcC\xc9\xe0j\x98\xbc\xfc\xff\xff\xff\xff\xff\xef?\xc4\xfcC\xc9\xe0j\x98\xbc\xfc\xff\xff\xff\xff\xff\xef?\xc4\xfcC\xc9\xe0j\x98\xbc\xfc\xff\xff\xff\xff\xff\xef?\xc4\xfcC\xc9\xe0j\x98\xbc\xfc\xff\xff\xff\xff\xff\xef?\xc4\xfcC\xc9\xe0j\x98\xbc\xfc\xff\xff\xff\xff\xff\xef?\xc4\xfcC\xc9\xe0j\x98\xbc\xfc\xff\xff\xff\xff\xff\xef?\xc4\xfcC\xc9\xe0j\x98\xbc\xfc\xff\xff\xff\xff\xff\xef?\xc4\xfcC\xc9\xe0j\x98\xbc\xfc\xff\xff\xff\xff\xff\xef?\xc4\xfcC\xc9\xe0j\x98\xbc\xfc\xff\xff\xff\xff\xff\xef?\xc4\xfcC\xc9\xe0j\x98\xbc\xfc\xff\xff\xff\xff\xff\xef?\xc4\xfcC\xc9\xe0j\x98\xbc\xfc\xff\xff\xff\xff\xff\xef?\xc4\xfcC\xc9\xe0j\x98\xbc\xfc\xff\xff\xff\xff\xff\xef?\xc4\xfcC\xc9\xe0j\x98\xbc\xfc\xff\xff\xff\xff\xff\xef?\xc4\xfcC\xc9\xe0j\x98\xbc\xfc\xff\xff\xff\xff\xff\xef?\xc4\xfcC\xc9\xe0j\x98\xbc\xfc\xff\xff\xff\xff\xff\xef?\xc4\xfcC\xc9\xe0j\x98\xbc\xfc\xff\xff\xff\xff\xff\xef?\xc4\xfcC\xc9\xe0j\x98\xbc\xfc\xff\xff\xff\xff\xff\xef?\xc4\xfcC\xc9\xe0j\x98\xbc\xfc\xff\xff\xff\xff\xff\xef?\xc4\xfcC\xc9\xe0j\x98\xbc\xfc\xff\xff\xff\xff\xff\xef?\xc4\xfcC\xc9\xe0j\x98\xbc\xfc\xff\xff\xff\xff\xff\xef?\xc4\xfcC\xc9\xe0j\x98\xbc\xfc\xff\xff\xff\xff\xff\xef?\xc4\xfcC\xc9\xe0j\x98\xbc\xfc\xff\xff\xff\xff\xff\xef?\xc4\xfcC\xc9\xe0j\x98\xbc\xfc\xff\xff\xff\xff\xff\xef?\xc4\xfcC\xc9\xe0j\x98\xbc\xfc\xff\xff\xff\xff\xff\xef?\xc4\xfcC\xc9\xe0j\x98\xbc\xfc\xff\xff\xff\xff\xff\xef?\xc4\xfcC\xc9\xe0j\x98\xbc\xfc\xff\xff\xff\xff\xff\xef?\xc4\xfcC\xc9\xe0j\x98\xbc\xfc\xff\xff\xff\xff\xff\xef?\xc4\xfcC\xc9\xe0j\x98\xbc\xfc\xff\xff\xff\xff\xff\xef?\xc4\xfcC\xc9\xe0j\x98\xbc\xfc\xff\xff\xff\xff\xff\xef?\xc4\xfcC\xc9\xe0j\x98\xbc\xfc\xff\xff\xff\xff\xff\xef?\xc4\xfcC\xc9\xe0j\x98\xbc\xfc\xff\xff\xff\xff\xff\xef?\xc4\xfcC\xc9\xe0j\x98\xbc\xfc\xff\xff\xff\xff\xff\xef?\xc4\xfcC\xc9\xe0j\x98\xbc\xfc\xff\xff\xff\xff\xff\xef?\xc4\xfcC\xc9\xe0j\x98\xbc\xfc\xff\xff\xff\xff\xff\xef?\xc4\xfcC\xc9\xe0j\x98\xbc\xfc\xff\xff\xff\xff\xff\xef?\xc4\xfcC\xc9\xe0j\x98\xbc\xfc\xff\xff\xff\xff\xff\xef?\xc4\xfcC\xc9\xe0j\x98\xbc\xfc\xff\xff\xff\xff\xff\xef?\xc4\xfcC\xc9\xe0j\x98\xbc\xfc\xff\xff\xff\xff\xff\xef?\xc4\xfcC\xc9\xe0j\x98\xbc\xfc\xff\xff\xff\xff\xff\xef?\xc4\xfcC\xc9\xe0j\x98\xbc\xfc\xff\xff\xff\xff\xff\xef?\xc4\xfcC\xc9\xe0j\x98\xbc\xfc\xff\xff\xff\xff\xff\xef?\xc4\xfcC\xc9\xe0j\x98\xbc\xfc\xff\xff\xff\xff\xff\xef?\xc4\xfcC\xc9\xe0j\x98\xbc\xfc\xff\xff\xff\xff\xff\xef?\xc4\xfcC\xc9\xe0j\x98\xbc\xfc\xff\xff\xff\xff\xff\xef?\xc4\xfcC\xc9\xe0j\x98\xbc\xfc\xff\xff\xff\xff\xff\xef?\xc4\xfcC\xc9\xe0j\x98\xbc\xfc\xff\xff\xff\xff\xff\xef?\xc4\xfcC\xc9\xe0j\x98\xbc\xfc\xff\xff\xff\xff\xff\xef?\xc4\xfcC\xc9\xe0j\x98\xbc\xfc\xff\xff\xff\xff\xff\xef?\xc4\xfcC\xc9\xe0j\x98\xbc\xfc\xff\xff\xff\xff\xff\xef?\xc4\xfcC\xc9\xe0j\x98\xbc\xfc\xff\xff\xff\xff\xff\xef?\xc4\xfcC\xc9\xe0j\x98\xbc\xfc\xff\xff\xff\xff\xff\xef?\xc4\xfcC\xc9\xe0j\x98\xbc\xfc\xff\xff\xff\xff\xff\xef?\xc4\xfcC\xc9\xe0j\x98\xbc\xfc\xff\xff\xff\xff\xff\xef?\xc4\xfcC\xc9\xe0j\x98\xbc\xfc\xff\xff\xff\xff\xff\xef?\xc4\xfcC\xc9\xe0j\x98\xbc\xfc\xff\xff\xff\xff\xff\xef?\xc4\xfcC\xc9\xe0j\x98\xbc\xfc\xff\xff\xff\xff\xff\xef?\xc4\xfcC\xc9\xe0j\x98\xbc\xfc\xff\xff\xff\xff\xff\xef?\xc4\xfcC\xc9\xe0j\x98\xbc\xfc\xff\xff\xff\xff\xff\xef?\xc4\xfcC\xc9\xe0j\x98\xbc\xfc\xff\xff\xff\xff\xff\xef?\xc4\xfcC\xc9\xe0j\x98\xbc\xfc\xff\xff\xff\xff\xff\xef?\xc4\xfcC\xc9\xe0j\x98\xbc\xfc\xff\xff\xff\xff\xff\xef?\xc4\xfcC\xc9\xe0j\x98\xbc\xfc\xff\xff\xff\xff\xff\xef?\xc4\xfcC\xc9\xe0j\x98\xbc\xfc\xff\xff\xff\xff\xff\xef?\xc4\xfcC\xc9\xe0j\x98\xbc\xfc\xff\xff\xff\xff\xff\xef?\xc4\xfcC\xc9\xe0j\x98\xbc\xfc\xff\xff\xff\xff\xff\xef?\xc4\xfcC\xc9\xe0j\x98\xbc\xfc\xff\xff\xff\xff\xff\xef?\xc4\xfcC\xc9\xe0j\x98\xbc\xfc\xff\xff\xff\xff\xff\xef?\xc4\xfcC\xc9\xe0j\x98\xbc\xfc\xff\xff\xff\xff\xff\xef?\xc4\xfcC\xc9\xe0j\x98\xbc\xfc\xff\xff\xff\xff\xff\xef?\xc4\xfcC\xc9\xe0j\x98\xbc\xfc\xff\xff\xff\xff\xff\xef?\xc4\xfcC\xc9\xe0j\x98\xbc\xfc\xff\xff\xff\xff\xff\xef?\xc4\xfcC\xc9\xe0j\x98\xbc\xfc\xff\xff\xff\xff\xff\xef?\xc4\xfcC\xc9\xe0j\x98\xbc\xfc\xff\xff\xff\xff\xff\xef?\xc4\xfcC\xc9\xe0j\x98\xbc\xfc\xff\xff\xff\xff\xff\xef?\xc4\xfcC\xc9\xe0j\x98\xbc\xfc\xff\xff\xff\xff\xff\xef?\xc4\xfcC\xc9\xe0j\x98\xbc\xfc\xff\xff\xff\xff\xff\xef?\xc4\xfcC\xc9\xe0j\x98\xbc\xfc\xff\xff\xff\xff\xff\xef?\xc4\xfcC\xc9\xe0j\x98\xbc\xfc\xff\xff\xff\xff\xff\xef?\xc4\xfcC\xc9\xe0j\x98\xbc\xfc\xff\xff\xff\xff\xff\xef?\xc4\xfcC\xc9\xe0j\x98\xbc\xfc\xff\xff\xff\xff\xff\xef?\xc4\xfcC\xc9\xe0j\x98\xbc\xfc\xff\xff\xff\xff\xff\xef?\xc4\xfcC\xc9\xe0j\x98\xbc\xfc\xff\xff\xff\xff\xff\xef?\xc4\xfcC\xc9\xe0j\x98\xbc\xfc\xff\xff\xff\xff\xff\xef?\xc4\xfcC\xc9\xe0j\x98\xbc\xfc\xff\xff\xff\xff\xff\xef?\xc4\xfcC\xc9\xe0j\x98\xbc\xfc\xff\xff\xff\xff\xff\xef?\xc4\xfcC\xc9\xe0j\x98\xbc\xfc\xff\xff\xff\xff\xff\xef?\xc4\xfcC\xc9\xe0j\x98\xbc\xfc\xff\xff\xff\xff\xff\xef?\xc4\xfcC\xc9\xe0j\x98\xbc\xfc\xff\xff\xff\xff\xff\xef?\xc4\xfcC\xc9\xe0j\x98\xbc\xfc\xff\xff\xff\xff\xff\xef?\xc4\xfcC\xc9\xe0j\x98\xbc\xfc\xff\xff\xff\xff\xff\xef?\xc4\xfcC\xc9\xe0j\x98\xbc\xfc\xff\xff\xff\xff\xff\xef?\xc4\xfcC\xc9\xe0j\x98\xbc\xfc\xff\xff\xff\xff\xff\xef?\xc4\xfcC\xc9\xe0j\x98\xbc\xfc\xff\xff\xff\xff\xff\xef?\xc4\xfcC\xc9\xe0j\x98\xbc\xfc\xff\xff\xff\xff\xff\xef?\xc4\xfcC\xc9\xe0j\x98\xbc\xfc\xff\xff\xff\xff\xff\xef?\xc4\xfcC\xc9\xe0j\x98\xbc\xfc\xff\xff\xff\xff\xff\xef?\xc4\xfcC\xc9\xe0j\x98\xbc\xfc\xff\xff\xff\xff\xff\xef?\xc4\xfcC\xc9\xe0j\x98\xbc\xfc\xff\xff\xff\xff\xff\xef?\xc4\xfcC\xc9\xe0j\x98\xbc\xfc\xff\xff\xff\xff\xff\xef?\xc4\xfcC\xc9\xe0j\x98\xbc\xfc\xff\xff\xff\xff\xff\xef?\xc4\xfcC\xc9\xe0j\x98\xbc\xfc\xff\xff\xff\xff\xff\xef?\xc4\xfcC\xc9\xe0j\x98\xbc\xfc\xff\xff\xff\xff\xff\xef?\xc4\xfcC\xc9\xe0j\x98\xbc\xfc\xff\xff\xff\xff\xff\xef?\xc4\xfcC\xc9\xe0j\x98\xbc\xfc\xff\xff\xff\xff\xff\xef?\xc4\xfcC\xc9\xe0j\x98\xbc\xfc\xff\xff\xff\xff\xff\xef?\xc4\xfcC\xc9\xe0j\x98\xbc\xfc\xff\xff\xff\xff\xff\xef?\xc4\xfcC\xc9\xe0j\x98\xbc\xfc\xff\xff\xff\xff\xff\xef?\xc4\xfcC\xc9\xe0j\x98\xbc\xfc\xff\xff\xff\xff\xff\xef?\xc4\xfcC\xc9\xe0j\x98\xbc\xfc\xff\xff\xff\xff\xff\xef?\xc4\xfcC\xc9\xe0j\x98\xbc\xfc\xff\xff\xff\xff\xff\xef?\xc4\xfcC\xc9\xe0j\x98\xbc\xfc\xff\xff\xff\xff\xff\xef?\xc4\xfcC\xc9\xe0j\x98\xbc\xfc\xff\xff\xff\xff\xff\xef?\xc4\xfcC\xc9\xe0j\x98\xbc\xfc\xff\xff\xff\xff\xff\xef?\xc4\xfcC\xc9\xe0j\x98\xbc\xfc\xff\xff\xff\xff\xff\xef?\xc4\xfcC\xc9\xe0j\x98\xbc\xfc\xff\xff\xff\xff\xff\xef?\xc4\xfcC\xc9\xe0j\x98\xbc\xfc\xff\xff\xff\xff\xff\xef?\xc4\xfcC\xc9\xe0j\x98\xbc\xfc\xff\xff\xff\xff\xff\xef?\xc4\xfcC\xc9\xe0j\x98\xbc\xfc\xff\xff\xff\xff\xff\xef?\xc4\xfcC\xc9\xe0j\x98\xbc\xfc\xff\xff\xff\xff\xff\xef?\xc4\xfcC\xc9\xe0j\x98\xbc\xfc\xff\xff\xff\xff\xff\xef?\xc4\xfcC\xc9\xe0j\x98\xbc\xfc\xff\xff\xff\xff\xff\xef?\xc4\xfcC\xc9\xe0j\x98\xbc\xfc\xff\xff\xff\xff\xff\xef?\xc4\xfcC\xc9\xe0j\x98\xbc\xfc\xff\xff\xff\xff\xff\xef?\xc4\xfcC\xc9\xe0j\x98\xbc\xfc\xff\xff\xff\xff\xff\xef?\xc4\xfcC\xc9\xe0j\x98\xbc\xfc\xff\xff\xff\xff\xff\xef?\xc4\xfcC\xc9\xe0j\x98\xbc\xfc\xff\xff\xff\xff\xff\xef?\xc4\xfcC\xc9\xe0j\x98\xbc\xfc\xff\xff\xff\xff\xff\xef?\xc4\xfcC\xc9\xe0j\x98\xbc\xfc\xff\xff\xff\xff\xff\xef?\xc4\xfcC\xc9\xe0j\x98\xbc\xfc\xff\xff\xff\xff\xff\xef?\xc4\xfcC\xc9\xe0j\x98\xbc\xfc\xff\xff\xff\xff\xff\xef?\xc4\xfcC\xc9\xe0j\x98\xbc\xfc\xff\xff\xff\xff\xff\xef?\xc4\xfcC\xc9\xe0j\x98\xbc\xfc\xff\xff\xff\xff\xff\xef?\xc4\xfcC\xc9\xe0j\x98\xbc\xfc\xff\xff\xff\xff\xff\xef?\xc4\xfcC\xc9\xe0j\x98\xbc\xfc\xff\xff\xff\xff\xff\xef?\xc4\xfcC\xc9\xe0j\x98\xbc\xfc\xff\xff\xff\xff\xff\xef?\xc4\xfcC\xc9\xe0j\x98\xbc\xfc\xff\xff\xff\xff\xff\xef?\xc4\xfcC\xc9\xe0j\x98\xbc\xfc\xff\xff\xff\xff\xff\xef?\xc4\xfcC\xc9\xe0j\x98\xbc\xfc\xff\xff\xff\xff\xff\xef?\xc4\xfcC\xc9\xe0j\x98\xbc\xfc\xff\xff\xff\xff\xff\xef?\xc4\xfcC\xc9\xe0j\x98\xbc\xfc\xff\xff\xff\xff\xff\xef?\xc4\xfcC\xc9\xe0j\x98\xbc\xfc\xff\xff\xff\xff\xff\xef?\xc4\xfcC\xc9\xe0j\x98\xbc\xfc\xff\xff\xff\xff\xff\xef?\xc4\xfcC\xc9\xe0j\x98\xbc\xfc\xff\xff\xff\xff\xff\xef?\xc4\xfcC\xc9\xe0j\x98\xbc\xfc\xff\xff\xff\xff\xff\xef?\xc4\xfcC\xc9\xe0j\x98\xbc\xfc\xff\xff\xff\xff\xff\xef?\xc4\xfcC\xc9\xe0j\x98\xbc\xfc\xff\xff\xff\xff\xff\xef?\xc4\xfcC\xc9\xe0j\x98\xbc\xfc\xff\xff\xff\xff\xff\xef?\xc4\xfcC\xc9\xe0j\x98\xbc\xfc\xff\xff\xff\xff\xff\xef?\xc4\xfcC\xc9\xe0j\x98\xbc\xfc\xff\xff\xff\xff\xff\xef?\xc4\xfcC\xc9\xe0j\x98\xbc\xfc\xff\xff\xff\xff\xff\xef?\xc4\xfcC\xc9\xe0j\x98\xbc\xfc\xff\xff\xff\xff\xff\xef?\xc4\xfcC\xc9\xe0j\x98\xbc\xfc\xff\xff\xff\xff\xff\xef?\xc4\xfcC\xc9\xe0j\x98\xbc\xfc\xff\xff\xff\xff\xff\xef?\xc4\xfcC\xc9\xe0j\x98\xbc\xfc\xff\xff\xff\xff\xff\xef?\xc4\xfcC\xc9\xe0j\x98\xbc\xfc\xff\xff\xff\xff\xff\xef?\xc4\xfcC\xc9\xe0j\x98\xbc\xfc\xff\xff\xff\xff\xff\xef?\xc4\xfcC\xc9\xe0j\x98\xbc\xfc\xff\xff\xff\xff\xff\xef?\xc4\xfcC\xc9\xe0j\x98\xbc\xfc\xff\xff\xff\xff\xff\xef?\xc4\xfcC\xc9\xe0j\x98\xbc\xfc\xff\xff\xff\xff\xff\xef?\xc4\xfcC\xc9\xe0j\x98\xbc\xfc\xff\xff\xff\xff\xff\xef?\xc4\xfcC\xc9\xe0j\x98\xbc\xfc\xff\xff\xff\xff\xff\xef?\xc4\xfcC\xc9\xe0j\x98\xbc\xfc\xff\xff\xff\xff\xff\xef?\xc4\xfcC\xc9\xe0j\x98\xbc\xfc\xff\xff\xff\xff\xff\xef?\xc4\xfcC\xc9\xe0j\x98\xbc\xfc\xff\xff\xff\xff\xff\xef?\xc4\xfcC\xc9\xe0j\x98\xbc\xfc\xff\xff\xff\xff\xff\xef?\xc4\xfcC\xc9\xe0j\x98\xbc\xfc\xff\xff\xff\xff\xff\xef?\xc4\xfcC\xc9\xe0j\x98\xbc\xfc\xff\xff\xff\xff\xff\xef?\xc4\xfcC\xc9\xe0j\x98\xbc\xfc\xff\xff\xff\xff\xff\xef?\xc4\xfcC\xc9\xe0j\x98\xbc\xfc\xff\xff\xff\xff\xff\xef?\xc4\xfcC\xc9\xe0j\x98\xbc\xfc\xff\xff\xff\xff\xff\xef?\xc4\xfcC\xc9\xe0j\x98\xbc\xfc\xff\xff\xff\xff\xff\xef?\xc4\xfcC\xc9\xe0j\x98\xbc\xfc\xff\xff\xff\xff\xff\xef?\xc4\xfcC\xc9\xe0j\x98\xbc\xfc\xff\xff\xff\xff\xff\xef?\xc4\xfcC\xc9\xe0j\x98\xbc\xfc\xff\xff\xff\xff\xff\xef?\xc4\xfcC\xc9\xe0j\x98\xbc\xfc\xff\xff\xff\xff\xff\xef?\xc4\xfcC\xc9\xe0j\x98\xbc\xfc\xff\xff\xff\xff\xff\xef?\xc4\xfcC\xc9\xe0j\x98\xbc\xfc\xff\xff\xff\xff\xff\xef?\xc4\xfcC\xc9\xe0j\x98\xbc\xfc\xff\xff\xff\xff\xff\xef?\xc4\xfcC\xc9\xe0j\x98\xbc\xfc\xff\xff\xff\xff\xff\xef?\xc4\xfcC\xc9\xe0j\x98\xbc\xfc\xff\xff\xff\xff\xff\xef?\xc4\xfcC\xc9\xe0j\x98\xbc\xfc\xff\xff\xff\xff\xff\xef?\xc4\xfcC\xc9\xe0j\x98\xbc\xfc\xff\xff\xff\xff\xff\xef?\xc4\xfcC\xc9\xe0j\x98\xbc\xfc\xff\xff\xff\xff\xff\xef?\xc4\xfcC\xc9\xe0j\x98\xbc\xfc\xff\xff\xff\xff\xff\xef?\xc4\xfcC\xc9\xe0j\x98\xbc\xfc\xff\xff\xff\xff\xff\xef?\xc4\xfcC\xc9\xe0j\x98\xbc\xfc\xff\xff\xff\xff\xff\xef?\xc4\xfcC\xc9\xe0j\x98\xbc\xfc\xff\xff\xff\xff\xff\xef?\xc4\xfcC\xc9\xe0j\x98\xbc\xfc\xff\xff\xff\xff\xff\xef?\xc4\xfcC\xc9\xe0j\x98\xbc\xfc\xff\xff\xff\xff\xff\xef?\xc4\xfcC\xc9\xe0j\x98\xbc\xfc\xff\xff\xff\xff\xff\xef?\xc4\xfcC\xc9\xe0j\x98\xbc\xfc\xff\xff\xff\xff\xff\xef?\xc4\xfcC\xc9\xe0j\x98\xbc\xfc\xff\xff\xff\xff\xff\xef?\xc4\xfcC\xc9\xe0j\x98\xbc\xfc\xff\xff\xff\xff\xff\xef?\xc4\xfcC\xc9\xe0j\x98\xbc\xfc\xff\xff\xff\xff\xff\xef?\xc4\xfcC\xc9\xe0j\x98\xbc\xfc\xff\xff\xff\xff\xff\xef?\xc4\xfcC\xc9\xe0j\x98\xbc\xfc\xff\xff\xff\xff\xff\xef?\xc4\xfcC\xc9\xe0j\x98\xbc\xfc\xff\xff\xff\xff\xff\xef?\xc4\xfcC\xc9\xe0j\x98\xbc\xfc\xff\xff\xff\xff\xff\xef?\xc4\xfcC\xc9\xe0j\x98\xbc\xfc\xff\xff\xff\xff\xff\xef?\xc4\xfcC\xc9\xe0j\x98\xbc\xfc\xff\xff\xff\xff\xff\xef?\xc4\xfcC\xc9\xe0j\x98\xbc\xfc\xff\xff\xff\xff\xff\xef?\xc4\xfcC\xc9\xe0j\x98\xbc\xfc\xff\xff\xff\xff\xff\xef?\xc4\xfcC\xc9\xe0j\x98\xbc\xfc\xff\xff\xff\xff\xff\xef?\xc4\xfcC\xc9\xe0j\x98\xbc\xfc\xff\xff\xff\xff\xff\xef?\xc4\xfcC\xc9\xe0j\x98\xbc\xfc\xff\xff\xff\xff\xff\xef?\xc4\xfcC\xc9\xe0j\x98\xbc\xfc\xff\xff\xff\xff\xff\xef?\xc4\xfcC\xc9\xe0j\x98\xbc\xfc\xff\xff\xff\xff\xff\xef?\xc4\xfcC\xc9\xe0j\x98\xbc\xfc\xff\xff\xff\xff\xff\xef?\xc4\xfcC\xc9\xe0j\x98\xbc\xfc\xff\xff\xff\xff\xff\xef?\xc4\xfcC\xc9\xe0j\x98\xbc\xfc\xff\xff\xff\xff\xff\xef?\xc4\xfcC\xc9\xe0j\x98\xbc\xfc\xff\xff\xff\xff\xff\xef?\xc4\xfcC\xc9\xe0j\x98\xbc\xfc\xff\xff\xff\xff\xff\xef?\xc4\xfcC\xc9\xe0j\x98\xbc\xfc\xff\xff\xff\xff\xff\xef?\xc4\xfcC\xc9\xe0j\x98\xbc\xfc\xff\xff\xff\xff\xff\xef?\xc4\xfcC\xc9\xe0j\x98\xbc\xfc\xff\xff\xff\xff\xff\xef?\xc4\xfcC\xc9\xe0j\x98\xbc\xfc\xff\xff\xff\xff\xff\xef?\xc4\xfcC\xc9\xe0j\x98\xbc\xfc\xff\xff\xff\xff\xff\xef?\xc4\xfcC\xc9\xe0j\x98\xbc\xfc\xff\xff\xff\xff\xff\xef?\xc4\xfcC\xc9\xe0j\x98\xbc\xfc\xff\xff\xff\xff\xff\xef?\xc4\xfcC\xc9\xe0j\x98\xbc\xfc\xff\xff\xff\xff\xff\xef?\xc4\xfcC\xc9\xe0j\x98\xbc\xfc\xff\xff\xff\xff\xff\xef?\xc4\xfcC\xc9\xe0j\x98\xbc\xfc\xff\xff\xff\xff\xff\xef?'
p118
tp119
bag2
(g3
(I0
tp120
g5
tp121
Rp122
(I1
(I2
I249
tp123
g12
I01
S'\xe2\xc4\xbd\x1d\x80\r\xa7\xbfD\xe6j\xb0M\x1a\xf1?\xe5.*\xf4\x93\xec\x92?\x10>y\xc3\x04N\xef?\xea?1\xd03\\\x88?\xe4\x1ad\x93i\xce\xef?\xdd\xc5\xabx$\x17t\xbf\xec\x97~\xa8\xf9.\xf0?\xa1\xe7\x9c"\xd1x\x90?_\xb7b\\\x0b\xad\xee?\xb1UYz`\x03I\xbf\xe1\xc2}Ldw\xf0?\xf3b\xda5\xf1\xbe\x8a\xbf\xca:s~\xbd\x06\xf1?d\xd0\x84\xbaFG\x98\xbf\xfc0\xbe!\xc9\xc1\xf0?\xc3/C\xc59\x86\x97?\xd9\xeb>\xc0\xb3\xdf\xed?\xcd.9T\xad\xfd\x8c?\xa1\xb8\xbfJ\xc9N\xef?\xa4A\xa9\xa6\xe1^8?=-3>\xe1\x0c\xf0?\xb5\xe7\\?\xbf\xeai\xbfB\' \x8f@\xb8\xf0?\x98\x9d\x06?\xd2\x9b\x98\xbf5A\xe2\x93;\x1b\xf2?\xa7\xc2\xabso\xe0\xb1\xbf4\x19\x9fF\xa89\xf1?u\x00\xaa\xc2\x96H\xa1\xbf\x9d\xd9\x1cW\xff\xb3\xf1?_\x05\x10\x8b\x0c\xad\xa4\xbf(\x15\xf6/\xd9\xd4\xf0?\xff\xdeB8\x855\x9a\xbf\t\x1e\xf5y\xf5\xe7\xf0?\xa0 $\x94?`\xab\xbf\x83\xe5v%\x12\x8a\xf2?\xaf4\x10\xcdd\xd8\x82\xbfG\xff\xcfa`\t\xf0?\xf8\xab\xf4\xd4\xe31\xa4\xbf6\xf8\x8d\xbf\x94v\xf0?\xf9h\x1f\xf6#\xc8\xb3\xbfiJ\xa3`v9\xf4?\xa8\x11hW\\\x11\x87?K\xeaI\xb5/\xef\xee?\xa3\xf0;\xf2\x1c\xd7z\xbf\\\x15[\xa0\x9a\n\xf0?\xcc\xa7s\r\x1f\x95\xa5?\x9c\t\x0e\xa0\xad\xc0\xec?\x04\x16L\\\x89\xc6\xa0\xbfH>*\xe8o?\xf1?[\xf5(\xf8JzJ\xbf\xd0\xc9y\x9c*$\xf0?\rE\xba\x96OC\x83?l\xc6Y\xbfw\x9e\xef?\x07E&\xb5\xc8[\xb9?\xc8\xb7\xd88GQ\xe6?\xae\xc5\xd3\x1e\xeb\x06c\xbf\xbe~\x01G{,\xf0?\xfc\x95W\x897\x19\x9c\xbf\xc7"0\xed\xad\x9d\xf0?\xc6\xde\xb2=-\x12\x95?\xdat\x03\x1a\x90\xff\xee?\xa8s\x13\xe5\xa5\x17y?\x8d`\xce\x98\x8a\x8e\xef?\x05\\\xceC\xa2%\xa2?\x97\x15\xabC^\xe5\xed?\xb6\xc9\x87\xf1\x14\xb3c?\x86\x10\x82&TF\xef?)\x83U\xf2\x1e:a?\x97\xe5z\xee\xe2\x8b\xf0?\x0b\x82\x10\'\xcd\xee\x80?r\xdb&\xce\xb5\x18\xf0?\xff\xd0\xa6\xcb\x08\x8eY?\xe3\xea\xa2\x1fs\x12\xef?R\x04,Xc\xb6\x8c\xbf:v\xccm\xb0\x07\xf1?\xe5\x8aD\xa8/\xed\x9f\xbf\xd4\xb8\xf3{\xb6\x86\xf0?4({\xa3ay\x99?\x9d\x00\'\xa9\x01b\xf0?\xd9\xbe\x80\x95\xfa;\xa4?\xb3\x93I\xa6\xc4\xbd\xed?\xb3\xc8\xbd\x17\x0f\xb2\x8a\xbf"\xf5^\x99\xe4\xc4\xf0?)\x06\xa8\x14\xd3\xc8\x80\xbfX/f\xa05\x9f\xf0?\xfd\xd5\xe0.\x12\x15W\xbf5\xd7r\xbdF8\xee?\xa8(\x9f\xcc\n\x01\x80?\'\xf94\xf9\xfc%\xf0?C`\xb7\'\tV\x88?\xd2\xc5\xa6\x1c\xfbC\xed?*\xd1\xe2y@\xbc\xa3?\xd5\xa0\xd7)~s\xed?:\'\x90\xa7\xb0\x9b\x99\xbf\t\xf4d\xe3`\x01\xf0?R\xc5\xf0\xbc\xb7\x1d\x88\xbfo\x91\x17\xd2\xe9Z\xf0?]\x1a\xc0\xf9\x1a\xd3\x90\xbfy\xbel\xb6\xff?\xf0?4\xdc8N\x8e\xfc\x9a\xbf\xd7^|c\xc8\x17\xf1?K\x8a\x07\xba\x97\xee\x88?\xaf\xa8}\xdf\'\xc0\xee?D\n\x87\xdaouy?>\xf4\x14agP\xf0?\xa2\x97\xe4\xac\x8d\x04\x8f\xbf\xdfJ\x97\xb5\x94Q\xf0?\xae\x02(i\xb7\x01q?\xf0f@)\xc5\xe1\xee?\x19?\x7f\xc8\xe5\x9f{?\x9d\xd8\x16L\x80?\xef?\x14\x03b\x147k\x96?\nJ\x95\x96v\xc9\xec?\x0c\x97<\x1b-\xd3\x85\xbfOC\xe4\xd4\x85\xc8\xef?\xd8\xba\x85\xff\xb8\xe7\xa7?\x15\xcf\xd6\xf2\xc8\x90\xeb?\x15Bw\x16k\xee\x99?}\xe2c\x1a\x8d\xa3\xed?\x1a\xb9\x18\x1f&\xcf\x9a\xbfq\x95\xd26\xe4\xac\xef?\x142\xec\x9b$w\x95? \xcd$\xfcu\xc1\xef?\xe8\x87zZ&\x01\xad\xbf\xccV4\xe7\xac\xea\xf2?p\x9c\xe3\xf5\xaa\xbcW?\tB\xd7\xdb\x90\xfd\xec?\xe4>\xff\x1a\x9d\xfc\x90\xbf\x0b\xcf|z\xcd\x0b\xf0?{\xb8`\x8d\x07\x8et\xbf\x9e9\xbc8\xfd\x8c\xee?]\xe65\x0e\xcc\x9c\x94\xbf\x11\xce\x1b\x06,P\xf0?\xea\x8f\xb32\xfe\x0f\x92?\xf9\xf0\xd2\x9fo\xf2\xed?1\x97\x04\xf2\xdcI\xa5\xbf\x1b[\x05\xca\xa6S\xf0?\x94y\xb0\xfb1\xde\xa3\xbf\x0e\xad\x8a!\x86\x04\xf2?\xa3)i\xb4-\x81\x82\xbf\xf9\xee\x18\xe6[\xc7\xf0?\xff\x85\xee\xf5\xae\xd2\xaa\xbf\xa7\xbc\x9d\xfd`9\xf1?\x04x(\xefU\xd9\x95??\xc8\xc4\xf5\xa7\x11\xee?)\x96\xfd>\x96[\xab\xbf\xe0\x8c\xa9\xda\xec \xf3?\x1bG\x9cH$\xdd\x91\xbf\xf1K\xa7\xff\x90\xb6\xf0?\xc6E/O\x97%\x91?a;\xad\x17\x1c\xf9\xeb?\ntw\x86`-\x91\xbfw\x02\x0b\xe3\xb2}\xf0?\x19?"\xefaT\x8d?<\x02\x06\xfa\xb4\xf3\xef?\xbcA\xdb\xf2H\xb3\x9f?\xaf\n\xda\xaa\xd1\xce\xee?\x05M\xe7Q\xb0\xe6\x98\xbf\xe1\xe7e\xdc\xebM\xf1?OR1/\x8a3\xac\xbf\xdd\xea\x91V\xf9\xc3\xf2?bC\x18\xdf\x0b\xff\x95?3\x82I"\xac\x1f\xf0?\x0f\x80\x05\x1b\xc0S\x9a?\xa5\x91O\\n\x97\xef?\xd7g\xf7\x1cM\xe9x\xbf>\xb2\xab\xcew\x0b\xf0?\xb3U.\r\xd7\x04s?9\x9a\x9d\x1aQ\xf3\xee?\x16\x10\x88\x9c\x13\xe0\x87\xbf\xff-\x1bM0r\xf0?-\xfbR\x97%E\x85\xbfR\x93\xc6\x03C\x0c\xf1?\x9fFYZ\x13Qz?yWv]q\xcd\xf0?\xe4\xb6Z\xfd\xc5b\x9e\xbf\x05H\x94\xb9\x13\x18\xf1?[\x90V\x89\xc8>\x92?\t\x87W\xf8\xe9~\xef?:\x97\xaa\xda[\x8e\x9d\xbf"\xee\x84\x11\x95\xf9\xef?2\xcd\xa1<e\x8d\xa3?\x0b4\xb3\x12U\xf9\xea?3pf\\\x07T\x9b\xbf\xd9\x04x\x10\x90\x0c\xf1?\x01Z\xfb\xfb\xd4-\x91?\x08X\xe4\x16G\x01\xec?*l\xb7\xaau\x01\xba\xbfyIa\xa5L\x99\xf5?\xf6\xe6\x84X\x1b\x06\x93?\xedi\x0cc\xa9\xde\xed?\x9c/j\x91]\xe6\x85\xbfi)&EKQ\xf0?\x80`$\x7f_\x07T?\xc2\xdc.\xd9N\x02\xef?\x91>c\xd0G\x9e\x81\xbf\x94<\x1d\xa0`\x1a\xf0?\x1b\xce\xd9\xbb\x07N\xa6?O\\9dW\xeb\xec?\xb0\xc226n\n\x88\xbf9`a\xaf\xf7\xb8\xef?\x1c\xae\xe2|\xbf\xeaW\xbfe\xf6\xde\xa8\xbd\x90\xf0?/*-\x18\x0fqd?k\x06+\xcf.\xe6\xf0?RfI\xf0N\x87\xa5\xbf\x87\xf9\x81\x86&v\xf2?\xcc\xcf3K}\x05\xa3?\xf0F&%\xb3\xc1\xec?z\x88qH\xb2N\x8e?\xd2\xc6=\xf0\x96\x88\xed?>\xe0\x91\xb9\x05]\xa0\xbf;\xb1A\xc3T\x97\xf1?\xf7~^1\x97\xde~\xbf\xec\xc2\xbeRzZ\xf0?I\x8c\xb2\xbfl\x9f\x86?J\xf2j\x91\x94\xc9\xef?q\xc5\x03\x0e\xbf.\x93\xbf\xc3\n\xbek\xa2,\xf0?\x9d\xeb[\xc5\x1e\x87\xb1?x\xc7v\xebR\xa3\xea?O\xd6{1\xaf7\x87?\xc5\x96QL\x12\xe0\xee?\x14\x92\x8eHd0\xb0\xbf\xca\x17\x11\xe3?\x1e\xf2?\x1a\xaf\x85\xae\xba\x96\xa0?D\x1d\xc5M\x96.\xf0?\xeb\x0c\xf0\x94\xa7\x17%?\xd3\x15\x06\x1e\xfc\'\xf0?\x0b\xd29\x0b\xd4\xb5\x8a\xbf_&"V\x95g\xf1?\xa1\xc1\xe0\x9fblX\xbf\xe4X7n\xa3E\xef?8\x9bl\x13\xbb\x7f\x8d\xbf\x81\xa0\xdc\x8a\xb4\x14\xf0?\xf6k\xfc4\xa3C\\\xbfK\xd5\xe3\xc2#I\xf0?\xa5\xd2|\xae\xcbio?\x1d\x92dU\xed\xff\xef?\x9b\xde\x19\xfe\xec\xe5z\xbf\xd2X\x9f\xf1\x94\xf7\xef?\x8dXTI\xf8$u?\t\xcco\x1f\xdb2\xef?1]G\x08\x99\xfd\x7f\xbf\xeeB\x9f\xc7\xa8\xb2\xf0?\xac\x9f$\t\x10R\x9b?R\xa0\xc7Fr\xa1\xed?\xdb\xee\xb3,\x19\xf9\xae\xbf\xa82\x03V\x84\x8e\xf3?;\xe9\x90\xf9\xe0\xc8\xa4?{\xc0\xd5M\xf6\x97\xec?\xe8\xe7@/\x1e\xcc\x98\xbf\x80v\xeb\x89>\xae\xf0?\xb9\xde\xbeg\x8c$\x8c?1\x94\xb5\x11\xb4\xc0\xee?\noJ\xb6n\x14\x9a\xbf\xdb\x02l\xd3i\x9f\xf1?m\xa6N\x98\xc7I\xa6?\\\xba\xe4\xdc\x9b\xa6\xed?\xcc=\x88;X\xc6\xb5\xbf\xa6l\xdc\x90K\xc3\xf3?\x1d\x0cg\xc9\xde\xc8\xa4?\xd1\xe2wb\x8b\x11\xed?\x93\x00\xd9P\x17\xe8\x83?O\xfb_\x03\x1c[\xf0?,\xfe?lC\x93\x83\xbf\xde,\xe0T%\xcc\xf0?\xe6\xe7\x1a\x9f,\xc1\xa6\xbf\x9b-B\xcb\xedL\xf2?\xa3\xd2\x8f\x91\x8f\x02\x9d?\xe1Sn\x03\x13B\xef?\xa8x\xe5 UF\x97\xbf\xa7u\x1f\x1f\xcd/\xf1?\xe2\x94\xefy\r\xe2\xa4\xbfi\xa7u\x14c;\xf1?\xef\xf1]\xcf(H\x95\xbfo\xc4\x8a\xc3\xfbd\xf1?\xb4d2\xa2\xfc\xa6\xb5\xbf\x95\xb7\x18\xbf?=\xf2?@1&q>\x15\xb1\xbf\xda\xce\x12\xae\tE\xf3?9\xab\xa0\xe4I\xaf\x89?u\x9c_E\xfa\xfc\xee?\xfc\xc1\xa7\x1b\xd4o\x9a?!\xe1U8\xfd\xcd\xee?\xa0H$?\xbb\t\xa2?K\xa4\xd0\xeeh\x15\xed?}\xbaL\xc0\x93\xb4\xa0?S\xf2\x95=\x9e~\xee?\xa1C\x03(\x92\x16\xa0\xbf\xff\x1b\x06\x0bK\x0e\xf0?\x8e\xb4\xceg\x1di\x9f\xbf\x88\xa2\xbb\xd2\xf1\xe1\xf0?\',\xa3x\xdcc\xa0\xbf\xa28\xf6Ls\x84\xf1?\xdb&\xaefu\xf4\x9c?RBS\tLP\xec?\x83\xa2\x1e\x98\xf7G\x85?\xf0\x8cEE\xfa/\xee?\x0f\xa4\x90i\xacu\xa4\xbf\x899F\x81\xdao\xf0?\xda~\x12M\x8aPX\xbf"{\x82S\xa2\xc0\xef?e}#\xb3\x12F\x86?\xcd\xf11\xa2\xd0`\xee?\xfb\xc5\x98\xed\x9b\xa5\xa0\xbf=6\xb0676\xf0?9\x97\x08\xed\xe9\x18{?\x95\xcd\xd6\x14\xab\x80\xf0?\xe1\x94\x89\xe7\x85E\x99?\xd7\xb6K)\x12G\xed?\xc2\xd5\xdcc\nC\xa4\xbfz\xb8%+?\xbb\xf0?\x1dOQ\xba\xb1\x04\x9c?\x02k[*k\xa7\xec?\xe8\xce\xb4\xe4Y\xb0\xa2?Q\xe7=\x15+\xe3\xec?OZ\xf6\xe5/\x17\x9b?\xfe\xa5qy\xcb;\xec?N:\xde\xfb \xb1\x82?w\x85z\x81\x9f\x90\xef?\xa7j]\x03\xe3\x0c\x84\xbf\xd6K\x99\xe8y\xa9\xf0?\x81\xaa&.7o\x8e\xbf\x11\xcdw\xa9?\xdf\xf0?vp\x8b\xd5\xfa\x80}\xbf(\x19\xa2\xdb\xd7\xca\xf0?\xf4u\x1a\xe7\xadQ\x9e?N\xc8Nt\xb5\xe6\xeb?m\x93\xaf\xf0\x96\x05\xa4\xbfx\xbcv\xfb\xe8\\\xf1?\x95\xd6\xa0\xf9\x8e\xb6\x97\xbf\xce,\xd6[\x12\x1c\xf1?e\xe4\x04x\xe7\x9bd\xbf\xddj\xa9V$\xc9\xee?\xbc\xdb\x81\x8aO;\x9f?\xe1\t\xa2\x04\x97\x11\xed?\xb5G?\xf0\x1aV\x9b?I9\x04?\x93\x90\xec?\x17\xf8\xea\x19\x8e\xb6\x98\xbf\xf1\xea\xf3\t\xbbk\xf1?\x92\xe7\x80\xa5\t[\x98\xbf\xdb%\xf0T\x03\xe0\xf1?\xf6\xd7\x06\x84p\x11n\xbf\xa8\x89{\x9aRx\xf0?p&\xca\xb3\xe5\xedo\xbf7\x9f\xb5B#K\xf0?K\xder\n\x04\x06\x95\xbf\x1bX(\xf3\xb2}\xf0?\xbbF\xaa\x9a$\x80l?\xa2x^g\x04(\xf0?\x10\x86\x83\xe6$\x86\x8c\xbf\x08\x17kw\x92\xe1\xf0?\xc1&+y\xe2\xcf\x92\xbfO\xa52\xb1w;\xf0?\xed\xa4\x9fR\x1b\xae\x97\xbfL\xacl\x05^/\xf0?bq\xc4L\x88t\x8a\xbfN)cC\x19\xca\xf0?H\xc4\xa5>\xf0\xc3\xa4\xbfM\x7f@\xed[\x85\xf1?`\xe7\x87\x9d\xac\xbc\x93\xbf\x1a"\xf7\xac3u\xf1?\xab\xaaRi\xc8\xbc}\xbf*\xbe|\xb1\x18\x0e\xef?,\xe84\x1e\x0f\xbe\xbe\xbf\x89\xa7\xb6\xa4\x19\xce\xf4?\x16X\'.\xa2\xdf\x96?\n\xe8\\\xf0\x1bB\xee?\xae\xe5:\x06Yx\x97?-\x08{\xd5\xd4:\xed?\xe21\xe1\xd7\xf8\t\xae\xbf-8\xb4\xb2\xa8u\xf2?\x1f\x9c\x13\xeeD\x9e\xa2\xbfe\x05\x01\x01\xcb\xeb\xef?p\x17\xc1VM\xe3\x97?\xb6\x0c>=m4\xee?\xab\xb0\xcc\xe3v\xc8p?\xf6\xda\xed\x9dm\xb6\xee?\xe0\x07\xad\xd6\x9f\xfc\xa4\xbf\x94g\x04\xcb!p\xf2?\x9a\xf9t\xf6j\xa2\x8d?\xaa\xba\x94\xc0q)\xef? :\xef\xbd\xe1\xa9\x95\xbf]1X\xc0E\xbc\xf0?\x93}\xe6D\x07\xa8\x9a\xbf\xa14&2\xf6{\xf0?jI\x1e\x91F4\xad?\x8c\xe6\xd1I{Q\xec?\x8b\xb9A\xd9\xe7\x8b\x9a?\xb9\x12\x15\x01`\xbd\xed?\x8cf\xa0\x9f\xf1Yo?e\x97\xeay\xc9\xe8\xef?\x8e\x97\x95s^"v?\x9b\t\x9e\xcb\xb0\xa8\xee?\x1c\xbc$\xa4\x82\xe5\x93\xbf\x11F*\x9f\x8ed\xf0?0\xd1\xc4G/\x92`\xbf\x16$\x07\x89\xb8\x1f\xf0?jq\x0cu\xe8\x81\xa2?\x13\xb8\x13\x05:\x1e\xee?\x12q[\xf2\x9b\x0b@?\xef\n\r \x8bY\xf0?p\xa8\x1a\x88=\x13m\xbf\x06\xc6\xc7q\xe5\x9f\xef?p|\xd3\xa9\x85\xc7\xa9\xbf\xf65y\x00\x87\xdc\xf2?\xb6p\xea\xf7\x9e\xf4\x91\xbfp\x971\x9a\x19\xcf\xf0?d\xcbr!\x19.\xa1?_}\x95e\xc28\xef?\x18o\xa8\xd2Q\x0b\x8c\xbf5\r)\xc8N\x93\xf0?\x9c\xc7\t\x05 \x86\x93?C"\xedMF \xee?\xfbo\xbb\xcc\x85\xc9\x9c\xbf\x00Q@\xf8e.\xf1?\x06\x8d\xe9\x93\xea-\x9a\xbf\xb5\xcc6(40\xf1?c\x9ed?-:\xb3?\x00?\x18\xec\x02Y\xe9?\xbfc&\xec\x07\xf3\x8f\xbf\x19\xe9Ca\x10\x9b\xf0?\x94vUi\xce(\x8d\xbf\xb0\xf0\x80\xf0\x04!\xf1?\tdr\xda\x04\x88\xac\xbf\x01\x1d\x8f\xd7\xf2c\xf2?eV;\xdf/*\x95\xbfU\xd4\xa5\x1f\x06\xd9\xef?\xb4\x16]\r\xa7cu?\x96<\x82@\xe0L\xef?\xe2) vb[\xba\xbf\xb3\xd3\x02\x80\xe9K\xf5?\x99\xcc\xf15{\xc8\xa6?!\xf1\x96\x8fz\x06\xed?\x90\xc0\xfbh\x9axU\xbf.n4Q\xb2\x98\xef?\x1b \x96t\xec\x93\xb5?\x98\xba\xb8\xa0\xfeb\xec?\xef\x8dYd\x9dYQ\xbf6\xa8g\xd0\x9f\xd2\xef?!\xce\xf8\'\xf2\xe9e\xbf5\x14\x1a\xe9\x14\xbb\xf0?\x01\xb1T\xb0\x9f\xae\x85\xbf\xdeF\xbdSQ(\xef?\xb6M\x11\xfc\xd4\x8e~\xbf\xd9\x96\x89\xc9Sc\xf0?\x05\xc8Kv.\xd7\xae\xbf\xce6/\xd0"i\xf2?\xa7\x0bX\x03\x02Y\x14\xbf2E\x88\xfd\xd8\xa6\xf0?\r\xfc~8e\xbda?\xe9\x17O`\x1d\xf4\xef?%n\xe4\x0cw&\x92?0\x1d\xf7\\\x19Q\xee?\xafl\x85\x86\x94\x0bs\xbfo\x19u> R\xee?U\xcb{7$\x08\xa4?J\x1f.\x00\xd8t\xeb?\xa7\x18\x8e\xcbq\x82r\xbfytu\xf6\xb8\xdd\xef?9.3=N\x90v?P.\xf1\x0cG\xa4\xf0?\xb5\x05\x0c\xdb\xb69\xa8\xbf\xb2\x92!*\xbfl\xf2?\xb8\xe5z\xa5\xca\x03i\xbfQd\xc4L\xd8\x13\xef?\xa35\xeb\xd8\x07\x1d\x96?S\n&4z[\xee?\xd3\xcd\xdc\xe4\x80\xf0\x8a\xbf\x92:\x04j\x18m\xf0?\xa6U7`\xcf9\x9f\xbf_\x19\xe7BZ\xe4\xf0?E\xbf/\xe2\xce\xba\x9b?c\x7f\xd3\x12|\xd2\xed?\r\xc9\x06\xaf\xe6\x05\x92?\xed>1/\x10\xf2\xef?B\x94$\x01&\x84\x93?\xbf%\xe8\x14l\x93\xed?=v\x1dp@]\x99?\x14T\xeb\x99\xca\xdb\xef?\xd3\xb7A\x00\xb1&\x88\xbf\xda\x8e\xfb\x7f\x86\x05\xf1?\x07\xe2\xf9\xfa\xf1\x13\xa0\xbf\xca\xaa<\xc3\x04\xe4\xf1?c\xd2\x91\xf3\x97\xdd\x94?z\xdc\xcd\x15\xde6\xef?\xde\xa4\xbe\xd9I\xd7\xab\xbf\x83\x8b\xec\xa1\xfd\x0c\xf2?\xb8\xe6%9`\xab\xa2\xbf\xcaA\xd2\xa2\x90G\xf1?N \xd7\xe0\rm\xa2?\xec\t\xd8r\x9f/\xed?\x7f+O\xc8\xfbi\x92\xbfM\xde\xe0r\xa0\xec\xf0?\xdf,B\x15\xd6\x00\x83?h{}\x80e\x08\xf0?'
p124
tp125
bag2
(g3
(I0
tp126
g5
tp127
Rp128
(I1
(I2
I237
tp129
g12
I01
S'\x8a\xfb_\x170 \xc4\xbf\xb4Y:Ay@\xf3?\x00\xb5\xec\'p~\xc5\xbf\xd0\x05\xeb\xc7\xc6J\xf0?\xdd@t\xe9\xd1\xdd\xba\xbf\xe0\xb2\xac\xe8\xc7+\xf5?S;9e\xca\'\xb7?\xaa\t\xc4N\xa8\xd6\xe7?`<\xc9\xcc\xb5\x00\xb6\xbf\xbd\xb2N\x8f\x15Z\xf4?I4D|\x0ea\xc2\xbf\x8e\x82\x85\x99SD\xf3?>H(\x9aG\x13\xa4\xbf\xc3\n\xeb\x8a:\xbf\xef?\xe9\xfb\x81\x17z!\xaf\xbfd\x9byi\xe8h\xf2?\x84\x83eX\x0b\x91\xa8\xbf\xbce\xd6\xffV\x89\xf2?\x13\xbb\x19\xa0\x11<\xa9\xbf\x0e\x8c\xaa1\xaa\x8f\xf2?^\x00wi,\xbd\xb4\xbf\xce\x136\xe3j\xea\xf1?\xa6\xb2/\x1d\x9a+\xb9?x\xf4\xb3\xa5\x9e\xaf\xe3?:7k\xee2\xa9\xae?\xd3\xa9\xceg\x94\x1b\xeb?\x8e\x18\x84\xa2G=\x91\xbf~\xee\x92\x02\xa3J\xf1?\x1a\xb2\xccm)\x08\xb6\xbf\xa8\x9c<\x1b\xda\xe4\xf1?\xd2\xa4\x86x9\xcd\xb9\xbfPt\xcd\x99\xdd\x93\xf5?$"\xafM\x8eL\x93\xbf\xd3\x9d0\xbf\xf8\x99\xf2?Qd\xd9O\x04\x8c\xb5\xbf\xaa\x86H`\xd4u\xf2?\xb8\xba\xce\t\xdeD\x9b?\xe5\xe0\xa1\xa2\xd6&\xed?\x95.\x01\xf3F\x9e\xcd?\xc6d\xf3\xa5\xf3\x0c\xe8?\x1bIj\x00\xde\xff&?\x9f\xb3\xf6\x9dTe\xef?\xbd\x842\x93v\x1c\xa2\xbf\xda\t\x07\xa8#V\xee?\xd7(&Y^\x80t\xbfB#@W-\xaf\xf0?\x86gx\x92\xb2\x10\xc2\xbfDT\xce\x10p\xd7\xf5?g\xe7\xe3z\xbb\x01\xb4\xbf\xb2mEZ\xc0\xf3\xf0?\xca\x87m\x99\x0cX\xb2?Qv&\x11\xd7\x86\xe9?\xe8\x1cO\xd0u?\xa5\xbf]\x07\xf9\x7f\x01L\xf0?\xe7\xdf\xfc\'q\x1ac?M\xc4 \x95=k\xec?\xd4\x1d\xd6O\xdd7\xa5\xbf8\xf3\xe4\xfe\x07Q\xef?\xf2m\xa2\x10\xd8\xd4\xb2\xbf\'TD\x8b\xf3^\xed?ehY\x05\xdax\xd5\xbf\x05\xccWRp \x01@\x88a:\xebRH\xd5?5\x05#\xb9g\xed\xe3?\x10\xf9h\xa7\xd4\x99\xbe?\x96\xf2\xef\xcc\xc4l\xeb?!\xfa\xf7\\\xf7\xb4{?\xdc\x1ch#\x1b\x1d\xec?\x05\xee\xa2\x00\xa3\x98\x8f?\xce&\x89\xa3W\xf8\xec?\xdb\xf7\x9b\xf1\x97p\xa4\xbfC\'p\xba\x0co\xf2?da\xa4Iiw\xa3\xbfc\x84\x91\x8eM\x1d\xf2??h\xb8#@\x05Q?\xd8\xe9T\xb0L\x07\xea?\x8f\xd1\xc3m\xa26\x8e\xbfS\xc0C>ed\xf0?\x95\xfd.\xab|J\xa5?\xf7\xe1\xdcR\xd9\xc8\xeb?;\xc3\x8e\xdf\xbb;\x94?F\xbe\x87r\xcaD\xee?C\xa5v\x1a\x85"\xa5?w\xfcy\xc6R\xde\xeb?(\xc9\x06d*\xca\xb3?\x80\xe0\xfcO6\xd6\xe7?X\x8eoJ\x91X\xb7\xbf\x03\xf8\xa8\x89\x91\xbe\xf3?g\xee\xa1\xf0\x0e\xa1\x9b?\xed=2\x80\xa1\xdd\xed?\x8b\x8f\xe5}A\x92\xb2\xbf\x01\xc7C\xc5z\x96\xf1?\x88\xd2\x05\x95\xf0\x0e\xb1?\xff\xf9N\xb9_\x02\xea?~\x8ac\xe9\x1c\n\xad?\x07\xa5&B\xce\xba\xe9?9J\x19\x15\xecP\xc2\xbfa\r\xe7\x8d\x02B\xf6?\xb9\xad,T\xde\x1d\xc7\xbf\xf4a\xed\xf0\x9d[\xf7?\xc3\xa3\xd1-\x96?\xa4\xbf\xdd"\nZ/\xa2\xf1?s\xcc\x9e\x07\x12i\x83\xbf\xbb_\xd2<#\n\xef?\xd6\xbe\x18+\xfc\x8d\x92?F|\xeb\xa4\xd7\xcb\xf0?\x91R\x9a\xd2\xb2\xf9\xba\xbfz\xdb/"o?\xf2?tf\xb6\xe9^\x9dg\xbfxB\xed$5\xc0\xee?+\xe0\xc4\x91\x0b\xef\xcb\xbf5\xd2\xa6=\xec%\xf7?\xf3\xa3-Y\xa8\x8fw?#)g\xb6\x0b\xb0\xee?\xb6\xfdM\x05\xc8\x0c\x9c\xbf\xdcf(D\xee\xa3\xf1?\xe7\x04\x1fW\xa7\xd1\x95\xbf\xe9Q\xbeEp\xaa\xef?\x83\xac\xdav7\xa4\xa5?y\x1b\xf3\x1f\xa7\xfd\xe8?\xd8\xdb\x0cr\xd4\x11\xa9\xbf\x84\x04\xdc<\xdf\x1f\xf2?\xbd\x97\xbe\xd2H\x84\x91?D\xf5\x13\x88\xbf)\xf1?\x84\x05\xd6\x13\xdb\x0b\xb5\xbf$\xaf\x0f\xa1t\xb8\xf0?VZRF\x97"\x90?\x19\x0f\xfb\xbatT\xf0?\xba\xd6Y\xbbt\x8a\x91?\xe0\xd9\xb3\x7f\xc9\xf1\xeb?\xf0\xa5\xd2\xe4\xf8\x18\x80?D?\xb8\xc6\x8c\xcf\xed?\x9f\xc8*,Z\xc4\xcc?\x95Y\x10\xf4\xfd\xef\xe1?\xa0\xa0D\x13\x171\xa5\xbfPp\xef\xc6\xc5m\xf3?\x91\x94\xf5zU\xa6\x9b?\xef\x06\x0e\x03\xf8\xb1\xec?,\x1cB\x14\x00U\xa3\xbf:;!\xdd\x95\xaf\xf1?z\x0e\x1f#\xc9\xc9q?;JRx"\xd9\xee?\xbb\xa5\xa2\xc4\'\xad\xb4\xbf\xdf\xd9\\\x0c\xc5\xff\xf1?\xa7\xc8\xcd\xbbw\x8e\xc4\xbfc\xd6\xae\xbckZ\xf1?^\\$\xc3\xa7\x18L\xbf\n\xcd\x92\xf0\xc7t\xee?\xd7\xb42\xa7p^p?#\x8b\xe7\x10\xbc\xf0\xee?\xbd\xc9\xfe\xff\xe5\x93\x97\xbf\xe3<\x06\'\xb2\xf8\xec?\x90!\xfa\xd6\x86t\xc0?sb\xb0o\xe3_\xe7?\xd5\xb2\xa0\x13\x96\x97\xb4?\xa9\xe0!\x96\'\xfa\xef?(qdy\x91\x17\xe1\xbf\x1c\xbd\xfe\x08%Y\x04@/$\xf04\xfe\x9d\xa7\xbf\xd7Ia\xb5v\xf9\xf2?\xb69\x92"p\xb4\xa9\xbf\xa5\xean+\x82\xe2\xf1?X\xdf\xbf\xc0\xddf\xbf\xbf\x8b\xf7s\x0bl\\\xf5?d\xa1;\xb5./\xa9?K\xcaz2\x94]\xe6?>\x15+O3\x9e\x97\xbf7N\xfb\xf7m<\xf0?N\xb8X?\x82\x0c\x91\xbf\x1d\x8cCL\xbeH\xef?\xbbv\xf2\x06A<\x94\xbf\x15\xa2\xc0\xf1}\x7f\xf0?\n\xc9,\xc2\xbb\r\xbb\xbf\xdd\t>\x1f\xe9\xf3\xf5?\x00\xcf?\xf1U*\xa9\xbfRLZ\x13U\x17\xf3?\x8aZ\x85\xe4y\xd4\xaf\xbf\xc3\x99\xe75:\x87\xf2?\x89O\x9e5\xe0\xf3\x91\xbf\x11\xbe\xe6v\x83\x8e\xf0?\xa7?\xea\n\xd2v\xdb?:\xe3}\xb5\xfd\xd8\xe1?&QuM\')\xb7\xbf\x00\xc4\xf5<+\xab\xf1?#\x89\x9f[\xe7D\x88\xbf"\xe8cN\xbd\x02\xef?\xf0V\x81Y\xa8*\x9f\xbf:\xf6\xb8\x1a\x07\xb9\xed?\xa5sn\xbe\x98\'\xad\xbfY3\x11RkX\xf4?&\x85Z\x9c\xbb\x93\x94\xbf\xaa\x84\xaa/UZ\xea?\xf1\x99B\xc9L\r\xc8?\xf5\x99[\xbd\x86\xab\xe2?WIO\xf5\x86m\xac\xbf>|\xd71v\r\xf3?\xcdKV\x0f>\x15b?\x13v\xee\xf5z\x8e\xef?\x86\xd4\xfd\x8c\x8a\x8f\x9c\xbf8F\xef\x9e\x19\xc8\xf0?:P\xe34S\x86\x8b?=G\x00\xc4\x1e|\xee?\xf9\xd7\xfd\xe7\x87=\xbc\xbf\x16\x99B\x0c\x08\xf8\xf0?Yr^dH2\xb1?u\x1d\x8e\xbe/\xb3\xeb?\x80\x7ff\xf7RD\xa1?\x1b\x0f\xa5(\x8e0\xee?TJ%\x82\xc3m\xa7\xbf\xfb\x7f-\xfe\x93\xdc\xf1?U\xfc5\xf4\t\x81\x90\xbfka\xe1\xc3\xf1\'\xf1?\xa2\t\x17.\x9e\x8c\xba\xbfTL\xcb\xac\x1f\x10\xf2?\x02m\xea\xba\x96\xdf\x81?3cM(p\x07\xf0?\xef^\xd1\xeb\x9b\xfd\xb2\xbf\x8d\x8c\xcfBx{\xed?\t\xe6\x9a\x02\x86\xe0\xa5\xbf[\xbbT\xedu\xc9\xeb?\xbf\x8a\x1c\x0eG\xbb\xaa\xbf|+9\xef\xb2\xc2\xee?\xd9p\xf9\x8d\xf1\xee\xa1\xbf\xe9xT0\x9e|\xf1?\xcdX\x82Y\xa7\x9c\xc1\xbfP\x9f\xd5\xac+l\xf3?^\xd8V\xed\x1f\x0b\x80?\xc1\x04{f\xc3\x9e\xf0?7\xca\xc3j\xfc&d?\x9e=\xaas\x0fO\xf0?_9\xac\xe9\xda\x03\xac\xbf\x1bRN\xb3\xe2\x99\xf1?X\x16\x19q\xe3"\xa5?\xd8t\xe9\x8e6\xc9\xec?\xcf)fLx{\xb8?Pu[9\xeb\xc6\xea?\x82\xd1U\x8b\xf1\xfb\xd6\xbf\x938g\x0b\xd0\xaf\xff?9\xfd\xb9i\x99\xe3\xc9\xbf54\xae2\xcd\x9b\xf6?\x03S\x81\x10\xf0\x8f\xac?;2K\xfb\x9c\xb0\xe7?2R,\xc9`\x19\xa6\xbf\x8dL\xbe\xc4\x8b\xe4\xf2?G\xc5\xec{\xe5\xbb\xc4\xbf\xb3\x99\xd4\x06q\xce\xf3?!\xd1\xd7M\x0bv\xad?rc5\x92}`\xeb?\xdfw\xb5\x83\x8d)\xae\xbfv\xd1\xed\x7f\xfd\xe5\xe9?\xd9\x07\xebw<\xa2\xbb\xbf\xae\x86;/\xac\xbe\xf0?\xa8\xf7%\x90 \xaa\x86\xbf\x80Z\x84\xb4\xd9[\xf1?f\x9fn\x86\xc9\x12\xc3?\xd8\x86f\xc6F\x1a\xfa?\xc7\x9d\x15\xbc\x9f\'\xb5\xbf\x03\xd5k\xbd\xa3Q\xf2?\xa8\x84\xef\x87\xe78~?\xb3\xe0v\x98i\xa3\xee?\xf0\x13\xa0Q\x9a\x8a\x9e\xbf\xce\xa9[\xf7\xea\x91\xf0?\x03\xed\x1e:X\x04\xa3\xbf\x98\xf4\xd1Q\x88&\xf0?N\xf9l\x0e\xfe\r\x8d?Mnf\xb2\x80\x86\xf0?h\x8b\x87\x07`\x8b\xa0\xbf\xbc\xa4VKR\xfa\xee?\x1c\xf3\xd6\xac)\x88\xc7\xbf?.\x8d\x98\xff\xed\xf5?m\xa6\xb46g\x1f\xb5\xbfp\x949\x04\xb3\x1c\xf2?!0\x14\xa2x\x0e\xaa\xbf\x1e\xcf\xa57\xcc\xfb\xf4?\x8c\x1f\xa8[\'X\xc9\xbf\xdd \x8c\xff\x02\xa2\xf4?G\xbb\xcd\x07\xc3\xc5\xbd?\xf7\xb6\x0eWQ\xea\xdd?`\x02\x9d\xa6f\x9f\xd5\xbfC\xde\xe6\x98\xfc\xc1\xfd?\xd2sRQ\x1b\xbf\xa0?+X\xac\x86\xec\xce\xea?\xa1\xfd\xad\x9aIES?\x9c\xf8\xdaN\xb9d\xef?\x92\xe5\xdaO\x1b\x95\t\xc0\xd9\xd8\x0e\xb6u\x0b+@\x19MW\xecO\x93\x81\xbf\xe7\xcf\x19\x8f\x8ag\xef?0\xb0\xee\xdbs\xdc\xaa\xbf\xb1\x912\xf8s\xb5\xf0?\x90Y\xd7\xd9\x08t\x93?\xc0/\xcf\xc4\x1f\x0f\xe9?\x8e\xbc \xe9\x1a5\xb0\xbf\xa2\xe7\xc1\xc3\xdb]\xf2?3W[\xe9\n\x98s?Z\xde\x164\xee\xb7\xee?\x8a\nCI\xc7\xf2\xad?\xc9\x87\x83\xff\xfe\xfe\xea?\xce\x1d\xa5n\x0f\xd7\xc0?q\xb5w7\xdf\x1e\xe9?\xb6\xc8\r\xb9\xf5\x9dr\xbf3\xc8?\xf1^$\xef?\n\xdb\xb9\xa4o\x9a\xa4\xbf\xc0\x1f\x8fG\xeb\x19\xf0?4*\xb9\xce\xde\xb4\x98\xbf\xbd\xe4\t\xe9\x9b\xee\xf0?@a\x03X\xe1w\xa3\xbf\xb6\xc4i\xda:v\xf1?\x0f/\xc9\xe5}\x08\xb5\xbf\xdbs\xa3\xe1\x85\xfa\xf2?\xa6T\xf8\xc1\n\x89\xc3?\xb3\xc0W\x17\xe7\x15\xea?\x89\x0f\xf3b\x7f}\xb7\xbf\xf8\xd8(-\xc9\x02\xf2?\x13\xe5\x9e.\x7fkl\xbf\xa9\x9e\x13F\xed=\xee?\x08\x9a\xacS\xd6E\xc0\xbf;\xd5\xf5\x98g\xfc\xf3?\x81\xd6\x97\xeb0Z\x9c?s\x98\x10g\xeaw\xee?\x81Q7\xae\xb7S\x9e?\xcd\xf7\xd6X\xd3\x9e\xf0?\xb0\xd0\x8ai!E\x98\xbfX\xf9\xd3<T\xee\xf2?w\xb1q\xcd\xff.{\xbf\x08\xda>v\xc5\x19\xf0?Dy\x17\x05\xea\x83\xa9?\x8b\xe6;\xc2Jg\xef?e\xa6\xec;>\x93\xc9?V$\x1dI\xfa\t\xee?\xce\x84\xdf\xe9\x00#\xaa?Z+M\xb0T \xf1?\x1f\xe8\xbb(m\x81\xb9\xbfO,l\x0f\x1c\x1d\xf0?\xcc\x9f\x16D\xdaR\xb9\xbfaZ\xd9\x1d\x0f!\xf3?\x19x<\x0b\x0b:\x98?\x98\xf6\x90\xdb\xc5\xa5\xee?E\x1a\xccL\xf3\xf9\xb5\xbf3\xac\xcc\x19\x8e<\xf0?\x06+Wo\xe0<\x84\xbfn\xfe\x9f\\\xd9\'\xee?\x139J\xea\xa3\x8b\xcb?\xce5\xb2\x12\x04\x86\xd3?\xfaZ\xc4M\xdc\xba\xb5?1\xb8k\x1a\xa5\t\xe7?\xe5_\xd3\xac\x8d\xbf\x92?}\xa3a8 u\xed?\x07\xf81J\x1d(\x80\xbf+s\x96T:\x11\xef?j\xdd\x16A0zw?3j\xed\x05j\xc2\xed?\t\x18C\xbb\x04=z\xbf\xc0\x1a\x82\x18\x98\xcf\xef?\xf3\xfb\xb7\x16\xad\x9e\xc4?Rz]\xed\xa2;\xdf?x_\xb2\xcbE\x0f\xb5?.G\xd0\x1c\xb1\xdf\xe4?\x80nU\xb2\xc8\xae\x95?<ti1,x\xf0?\x8a\xde\x1a\xb3\x99F\xb7\xbf\xb5\xb5\xed\xe3<\xb4\xf1?`\x84b\xfc0S\xad\xbf\xd6&#\xe5\x18\x87\xf2?\\\n\xef\xdd\x01\xc0\xb1\xbf\x86{\xe4\xfa!\x1b\xef?\xca\x16xI\xf5\xfa\xb4\xbf\xceuz1\x14;\xf2?$\xfa\xd7\x89y\xf4y?\xeaW\xaa\x12e\x14\xf0?f\xf2\xf0&W\xea\x8c?n\xfb\x93\xd0\x14#\xf0?\xb5\xc4\x8f\xc7kU\x8d\xbf\x9aV\x812\x1eB\xf1?\xee\xd6\xbb@\xcb\xab\xad\xbf\x01\xafk\xedt\xe4\xf0?\xdfH\xa1 g\x7f\xb4?;t\t\xbe\x8e\x9c\xe6?\xcaE\x83\xc7\x13\xb9\xa4\xbf\xe7f\xda4\xf7\x8d\xf0?D\xf5\x0c/vy\x94\xbf\x9e\x08\xd2$\xafN\xf1?\x1e@) .\x1e\xb9\xbf\xa5\xa3\x93M\xddY\xf4?\xbe\x14\xdf\x07\x04\x11\xaa\xbf\xbfmh\xfaR;\xf0?]Q\xc4\xe7tz\xac?t\xd9\xf1S\x06\xf3\xf1?\x95\xc0P\\(\xcc|?\xb9\xc9n\xde\x9ee\xf2?\xdd\x16y\xcf\xben\xae\xbf\nQ0\x86=\xaf\xf1?\xcd\x8c0\xa3G\xed\xc4\xbf\xf9\x83_\xc9\xc0\x94\xf1?[?\xdbE\x10\xde\x82?B\x1d\xe8\xff2\x05\xec?cN\xe1\xb0\xb3\xe1\xb9\xbfi\'M\xa5\xd5Q\xf3?\x9c\xde}\xcdO\t\x91\xbfa(#\xe7\xb4#\xed?Z\xa8\xb0\x97#p\x85?kM.n\xce\xac\xf0?3:1\xd1\x01T\x91?\x17l\xd5/U<\xed?Rd\x8aIU\\k?\xbc\xc2S\x8c\x8a\xf7\xf0?\xa2\xc7\x16!\xb6\x99\xb6\xbf\x08\xb3\x8c\xf7[6\xf4?\xa5\xf7\xe5\xee\\\x98\xc2\xbf\xbd\xe9\x89\xbf\xad\xf9\xf6?A\x02\xe5\x86\xe8\x1b\xb3?\xc60\xb1\x89\xd1\xb1\xee?\xcc\x94\xdbfQ\xaar?\x9d\xf6/\xec\x10\xeb\xec?\xf0C\x0c\xa1A\\\x8b?\xd3e\xbdFO\x0b\xf1?E?\x18v\xdf\xd0\x82\xbf9\xeb6\xe6\xfe\x11\xf0?\xf0zm\xc2G\xe4\x90?\x9f6y\x98\xdb\xe1\xe7?\x98\xd3~\xbe7\xff\xc1?\xca5\xc8\xf3g\xe3\xe6?\xa8\x9fb5\xbe\xbf\xc1\xbfd\xdf3\x85\xd5\xc2\xf1?\x11\x01SH\x85\x9d\xdd\xbf\xeb\xe3\x02\x12V\x16\x07@\x123\x14\xac\xe1r\xb3?rT\xb3\r\xdf\x00\xe6?\xcf&-\xa7\xaeC\xc1\xbf\x03"Z\xa0;\xcf\xf5?P\xa1\xbb\x96}F\xa5?=^W\x83\x97\xdf\xee?\x83\x04\xed\td\xb5\x9a\xbf\x04\x8f\xdbP\x0c\xc7\xee?/\x98\x93\xd66W\x91?\xf0\xfe]\xf5\xab\xe2\xee?4-O\x10\x9c_\xce\xbf \x8f\xca\xe3\xd9\xc8\xf3?\xf3\x88\t\xee\xa6\x00\xb7\xbf\xc5\xb9\t\xca\x9a\xd3\xef?\xa5\x93\'hR\x18\xaa\xbfGs\xf5\x90\x8al\xef?V`\xb8RA`\x82?_C\x08\x01\xa6\x85\xe8?pd\xa4\xc4\xcb\x9d\xaf?uK\x8eK<L\xeb?G&\xef^\xbc8\xa8?&&\xf0\xe4\x9b\x13\xef?\xa50\xaf\xbf\xe9\xa9\xa0\xbfG{qP\x04\xe1\xf1?\x98\xd9\tZ\xa4\xbf\xb2\xbf&\xb6\xadzM\xa7\xf0?\xe3\x99@R\xd9\x03\xcd\xbfE\x11\x9dS/\x12\xfd?\xd0B7\xf6\xd9\x17\x9c\xbf\xad|d\t\x83?\xee?\xaa\xfe\xf8\xb3\xd2\x08\x90\xbf$\xaf\xa1\xd1\x93\x16\xf1?2j\x13\x97-\xb4\xc4\xbf\x8c\x99\x02y\xc9|\xef?\xa5\xf48, \xe0\x83\xbf3r\x02\x8f\xac@\xee?\xbf\xf1\xcf\xb1A\x9f~?_}\xb8\n\xd0\xfd\xef?\x83\xf2\x8d\xfe|\x1d\xcf\xbf\\\x13_\xd6\x98\xcd\xf8?>\x9eW\xbc\xbcM\xad\xbf`\xc0\x18\x1b\x01/\xf0?\xf0\xd5\xadR\\\xa0\xb4\xbf5\xf1M\x94x\x12\xf1?p\x89^\xa4\x90\x08\x85?a\xe3%\xb6.\xbe\xea?\x05~e\x8a\xc3\x14\xbd\xbf\xcfJ?\x13&{\xf3?'
p130
tp131
bag2
(g3
(I0
tp132
g5
tp133
Rp134
(I1
(I2
I421
tp135
g12
I01
S'.F\xda\x12\xc8\xec\x86\xbf+\xe6Ey\xa67\xf1?={\x1a\x1d;C\xb2\xbf\x98\xd3\x1fI<\xfa\xf7?i\xba\x86\xc2\x9f\xa3\x89?*m\xd67x\xa9\xee?<\xc3S\xd1\xa4a\xa1\xbf\xa7>q+H\x06\xf1?\x9b\x8eNN\x10<\xbd\xbf^\x07\xd0\xca\t"\xf1?J\x12`\x97\x8c\xc8_?k\xb7\xf4\\\xd0\xa2\xef?\xearC=\x0fA\x98?yh:\xd0g6\xef?/\xaf\xce\x94\x86t\xc5?K\x9dvX<\n\xe0?\xb6\xaa\xc5i\xea*\xa6\xbfB\xaa\x8b\xb1"\xd5\xee?\xfe4\xef\x083\xa1\x91\xbf{\x0c\x8d\x06D\x17\xeb?\xa4>e\xf4\x87E\xab?\xf2\xb4\xdc\xb7D\x15\xef?;<\xea\xcdR\x04\xa3\xbf\\\x96\xd2V\r\xee\xf1?\xb3\xf8\xdb;SM\xaa\xbf\xb3\x13 :\xba\x02\xef?\xbaQ\x84{B|\x89\xbf\xfc1<\xc0\x0f\x9b\xf2?o\xc57\x05\xfcj\xc8?\xb5\x11\xf8\x1d\xe1\xda\xe7?\xcb\x89\xf35\x98\xb2\xa4\xbf\xacB\xf0\x18\x91B\xf8?\x1b2\x9e\xbf\x9bU\x9d?Q\'\xab\x9a\xbf\xda\xe5?R\xb6\x9b\xecwH\xb6?f\xa2m/\n\x88\xf0?\xbd\xff\x14Pv\x15\x9c?\xaa&\xd1\xdb\x8c9\xf5?\x86\xd9\xb8<T\x8e\xb5\xbfwY\xf4\xd8\xffJ\xf1?v\xad\xa5\xeb\n\xb5\x92\xbf\x08\xab\xee\xfe\xe4\x96\xf0?\xf71\xf8r\xe8\xb9\x9c\xbf \'\x1b\\\xdd{\xf0?\xd2\xf9>\xc6$\\\xbf\xbf8\x88\xdc\x82\x1d\x84\xf5?\xe2\xd5\xa6\xe1\xcb\x17\x93?\xa8\xb4\xa1\xf8;\xfd\xef?\x8au\xf5O\x05)\xa4\xbf\x1bF\x1d\xabB\x98\xef?If\xde.8\x9e\xaa\xbfJ\xa0\xbb\xe86@\xf1?\x0f\x02\x1dl!\xb1\x8c\xbf+i0\xce>\xc2\xef?l\xaa(\x8a\xe1\xf3\xb4?\xfe2\x874T;\xed?XS&;Bs\xb6?B,\x88\xd8\x1c\x01\xe5?\x08cIY\x02\xbe\xa4\xbfg\xbb\xf9I\xbd\xcb\xf0?^N5\xcc\xa5\x95\xad\xbfM\xd2IE\x0e!\xf3?\x0f\x1c\x85A\xd5\xe7\x94\xbf\x00\x92\x88\xca\x1cu\xf1?\x9c\x1d=\xa0\xb3M\xc0\xbfg\x17\x96\xa1~5\xf1?0\x00\xc0\xa2\xe2\x96\xb2?\xf7\xdc\\\x02\xfc\xd6\xe5?\x97@\x83t\xd0\x11\xb5?i\xaaE\xd1\xeb\xcf\xe9?\x91\xf0\n\xa0~6\xa5?\x8e\x97\xf1\xc3n\xdc\xec?\xeb\x9f\xf4Fn\xe9\x83\xbf\xfb`\xe8\xcc\xedx\xf1?\xc7w\x04\xac\x95`\x8d\xbf\x0f\xab\x12U"x\xef?\xd2\xfd\x7f;\xd2\x7f\x7f\xbf/\xf8_M`&\xf1?T\x1f!\xe7h\xc1\x88?\xbf\xb8\xe9\xb0\x83.\xef?\x95\xab\xba\xb8\xf9\xf9\x81??\xe7H\xbe\x18\xd9\xf0?\x8e\x95]\\%\xda\xb9\xbf*\xadC9\x00\x11\xf3?\x83\xccE\xca\x81b\x89?\xf0-\x91\xaf\xf3l\xf2?Dg&\xc5Z\xa3\xa2?O\xd7\xf8oy1\xee?\xaf)R4\xa9i\xb5\xbf\xddGBBq\x83\xf2?\xcc\x92\xa1_\xea\xf2\x96?\xaf\xe2\xb2Pq>\xf0?0\xb9\xe7\xc9\x9a\xfd\x99?\xa4LK\xd3\xc6\xe8\xe8?\x02O\x89\x05\xf8\x8d(\xbf\xa1\x1e\x0bE\xf2X\xec?\xb0\x8aX\xb1\xe7\xdf\xb3\xbf\x81\xd0\x14\x04\x97\xce\xf1?I|\xb8+\xe8\xff\xa3?\x19s\'\x99\x0bv\xf6?\x80\xbeq\x0ee\xca\xa7?\x16\x08\x10\xb5#\xdc\xe8?\xa3.\x9d\x9f\xec\xe7\xbd\xbfIq\xa1h\xacl\xf1?Q\xf2ZL.\xdc\x89\xbf\x95a\xc7\xe5\xe9\xaf\xef?\x8e5\x98\x1cu<\xe9?\xf3\xdb\ry\xcd0\xb5\xbf\xb8.X.\xb5\x1e\xa7\xbf\xf53Z\x82\x1a\x1b\xf2?\xe3\'\xc8\xafN\xdd\x7f?C\x1a)D4\xfb\xf0?B\xd8\x19\xef\x1f\xec\xbd\xbf\x94\x81\xc0NYQ\xf3?>\xa8~b\xc2\x8b\xaa\xbf\xeeC\x97\xd8\x16\xe5\xf0?>\xcc\xc5\xcd\xd7\xd3s?r\xcb\x9d8 *\xed?\xdf;\x12]\xd8y\xa1\xbfG\x90\x1e\xcei\x1a\xee?\n\xbe\xea\xf4\xc3\x89\x8b?\'\xf1\x8d[\xf8&\xf3?[\x0b\x00\x81\xbf\xb5\x89?``\x8eA%\x0f\xef?\x1c)X\x08\x02L\xa2?,E\x08\xe3\x1b\xdb\xf0?\xd1J<\xaa\x02\xe4\x84\xbf\xf5\x0c\xd8M7/\xef?B\xc3\xb2\xe9\x11\xf4\xac?\xa3]"SZ:\xec?\xcd\xfevj\x8b\xf5\x96?\xb9O\x074\x18\xff\xe8?3oN\xc3\xb1N\xba?]\x1b\x0b\\#\r\xe7?\x0ei\xe7\x1eLy\xc4?\xb2\x8f\x0f\x98d\xc5\xe9?A\xf8d\xb8\x97\x0e\x83?{\x0f\x85\xa6\xa3G\xef?\x9a\xfdh\x0c\x0c\x1a\xa5?\xc4\xfcr\r\x1aW\xe9?\x0e)\x18Q\xe4\x92\xbe?)\x14\xa79j\x99\xea?\x1c\xf3\xf9\x87\x91U\xb0\xbf\xd2\xce\xf4\xd8\x8c\xa3\xed?\x97aD\x92\x0c\xa5\x91?&\xaesC}\xc7\xee?\x81n\x00>D\xe3\xb8\xbf7\xec\x81B\xf9g\xf3?\xb2\xe32\xe9\x90\xc9\xc6?\x1c#\xd4\xcd;\n\xe6?\xfe\xa4Wd\x95\x12\xc7\xbf\x94\xda\xaa (2\xf6?;ZA\xea\xe8\x02\x99?\xe41\x10~\xcc\x1a\xf0?VS\xe2/:\xc7\xd3\xbfJH\xa1\xe6\xd7\xbd\xf8?\xffeZ5ap\xa7\xbf;\xac\x1cO\xb8\xc8\xf1?L\x90\xb5H\xa0\x9c\xac\xbf\x1d\xc5\x8e\x9c\xde\xd6\xf0?[\x86[FN\xc3\xc4?,\x8fy\x8d\xb5\xc7\xe9?\xf4+\x86\xc5\x92\xa0\x94\xbf8\xc4{%\x8f\xba\xf1?^!\xdb!\xa9L\xb1\xbf\xac\x04\xee\xe2y\x1e\xf3?\xa6A\xfe\x13}\x10\xc6?\xe71\xd2\x1cp\xa3\xee?\xf8V\xcb\x19v\xc2\xa2?bm\xec;\xbb\x1c\xec?=\x15_\xe4pN\xc0?\xb0`D3WD\xe9?6\x04\xf7.\xfdP\xb1\xbf\xc7^w{@\x8a\xf1?\x7fp1\xc8\xa0l\x87\xbf\x92a4\x80^\x18\xf0?F=\x81\x07\xe6\xc7\xaf\xbfM\x83\xe0\x1d\xd9\xaa\xf3?\x11\x06J\x98\x8f\x96\xa6\xbf\xf7\x9e\xbcm\x83\xd5\xef?\xfb8\xa97\x9a\xee\xb0\xbf\xcdN\xd8D\xfe\xb8\xf3?\xdc\x18\x84z\xa0\x9b\xa1\xbf\x81\xbeV\xbeB\x04\xed?\xbcci@\x11-\xbb\xbf\x8b\x84\xc5yG\xf3\xf5?\x87\xf6:\xa7$\xa6\x80\xbf\xf7\x0b#\xab\x94P\xef?\x7f+<\xd5\x1b3\xc7\xbf\x8b\x18\xb0\xed\x8d\xbf\xf4?\xf5_\xc6\x05K\xa6\xa1\xbf\xee\x186C\x8f\x90\xf0?\x97_X\xc4\x95X\xa4\xbf\xeb~i\xdb\xbf\x9b\xf1?\x9b\x9e\xff#)\n\x9f\xbft\xfd\xb9\xcb56\xf6?}~\xa4+_\x00\x8f?KEk\xb9"u\xed?V\x13tr\x81\x85v?\x85uTZ\x1c\xfe\xf1?\xda-l\xe6\xf5\xd0\xaa\xbf\xf1{I\xd0\xf3\xc8\xf1?\x8786 Ml\x93?\xde\xce\xeb\x15\xe4\xb7\xf0?\x9bq\xf1]\x18^\xf7?\xf6\xf9\xf9\xfd[\x15\xd2\xbf\x185\xd5\xdaJ\xb1\xb7\xbfp\x94\xde\x927\xb6\xeb?\x80/\xa0Ew\x7f\xb1?L\xbd\x18\xf5\xb5\xda\xf4?R}\x98\xd5/\x1d\xae\xbf\xe0\xb3\xbb\x96\x02[\xf2?7\x8c_\xc5V\xbdh\xbf\xd6\xd0\xb4\xed~?\xf0?;\xe2\xb7\x13\x90\x1d\xb5\xbf\x8eUC\xe2Z6\xf3?\xeac\xbcP\xd5B\x95\xbfE\x06\xd4\xce\xc1\xbb\xef?\x0c\xae\xc9\x83\xf3H\xb6\xbf\xc7~4*\xa3\x04\xf1?\x92@%a\x10M\xa3?F\xcfk;\x1a\xfc\xe7?\x9e\x08\xa2(!\x06\xb6\xbf\x10D\x19\x103b\xf1?\xc7\xe4\x984G\x0b\xb6\xbf\xb3&\xd1\xbf\x10f\xf1?\x7f\x02o\xe1\xd8\xbb\xae\xbf\xd9V/\x8d\x05\x9b\xf1?\xf5\x83\xe93^W\xc1\xbf?\x90G\xd7$\x1b\xf5?\x99\xaa\xd5G\x02\x05T\xbf\xd9\xeb\x08\xd6\xf2]\xef?\x9d>\xddo\x91\xabm?Q\x0e\x96\xab\xf5Y\xea?\xc3\xfa\x1a\xdc\xd4\x8b\x9e?\xa2\xc8\x9fdd\xee\xe8?\xf0\xde\xb7P\x95\x83\xbb?j\x98\xb31\x92\xa1\xe4?\xd6\x9cx[t\xee\xc5\xbf\xc5\xd7xH\x85\xc6\xf6?"\xbf\xc5M\xa5\x17\xac\xbf\xbb\x1et\x82l\x17\xf1?Z\xd6\xc0Ik%\xa1\xbf\xfc*\xb0-\x1f\x00\xf2?\xe5\xea\x88+\x10\x93\xb3\xbfU#*j\x02\xbc\xf0?\xa6\x89\x1fK\x8d\x02\xb7\xbf~\\\\f\xd9J\xf0?\x89\xeag\xbd\xcf<\xae?O\x91\x16;\xc1[\xe8?=\xac\xc1\xc9\xefW{\xbf\x8dr\t\xc9\xb5<\xf2?\xd0\xba\x170\xfaJ\xae\xbf\xbdo\x1a\xd7\x00\xbe\xf0?\x11\x11\x8c\xad!l\x9b?\xf6\x85\xc1\'\xf0h\xee? \xa4+\xd6\x13=s\xbfd{+\x8f\x00\xb7\xee?#>~\xcc\xda\xec\xb4?\xb6\xaf\x84,\'\xd7\xe9?Q\xa6L\xc2)\x84\xc0?\xee\xa2\xc0C(\xfd\xde?\xef\xfd\xc5-py\xb9\xbf%"\xb3\xd4\xf7;\xf0?\xb2N$\xab\x0bP\x85?\x1d\x8e\x8c^\xf7{\xee?\xc2\x16\xdbgM\xe1\x91\xbfQ8\x04a!\x8d\xf0?s\xd9\xc0S\xff\x17\xb5\xbf\xc4\xb9\xd0\xf5CU\xf2?\xbe~y\xe7\x9b\xa6\x10@\x00\x9dWs\xef7\t\xc0\xcc\x94\xf3@\tm\x88?\xee8\xd4\x86-\x1c\xf0?\x9aP%\x08\x0f!g\xbf.\x04a+\x96\xb1\xf0?\xa9\xe70\xc7\x85\xba\xaf\xbfX\xa3}\xd7\x84\xe8\xf1?}c\xa3\x04\xec\xca\xa9? \xcd\x92\xf8F#\xf0?\xb6M \x07\x19h\xa4?\x8a\x8a\xa9@\xce\xc3\xe9?\xe2+\xfd\x17\x81\x08\xb8\xbf\xc7\x89\xb9V\xe4\x1e\xf4?\xe3"T\x18\x80\xa7U\xbf\x96\xe4\x07YRI\xed?N\xfb\xe1\xf1\xfe\xde\x7f?[`\xcc\xfb\x96\xf6\xef?\x1a\xe9\x0fJon\xc0?\xcc\xb3R\xd9?\xe2\xe1?<\x19\x01\x8d{\xbc\xab?a]\x1e\xc7s\x1e\xe9?;[FY$@}\xbf\xb1\x92\xca\xe1#\t\xf1?\x18\xf4\x88\x1e\xd9\xd2\xa6\xbf\x9a\x93\xf2\xc8$\xbc\xf3?L\xe8\xa9&\xbc\xbc\x9f?\x98\x91""\xfeo\xec?\\+vL\x90\x11R?\x80\xf3\xe7\xce\x7f\xdb\xf0?\xcb\x1d\xa4\xdd\x9e\x0e\xb5\xbf\xea\xcb\x9c$\xe1\x10\xf3?=\xfa\x98\xa0\xdf\x9b\x87\xbfe;\xe3S\xbev\xe9?\x9c\x067\xb1\x83\xd4\xb0\xbf\x96\x049\xd3\x06\xc7\xf2?\xe4\x89\xa4)H\xb9\x8f?\xeb\x15\xcc\x85l\xe2\xf2?\xa2V\xc2\xa2X\x92\x96\xbf%q\x8e\x16\x81\x1c\xf0?\xeb\xdeko\x88\x87\xc2\xbf\x9a\xfc#)\x8a\x06\xf3?\x92`\x8b\x96A\xc7\x98?\xc1\n9\xc5u(\xee?\x8b=\x85\xf8\xe8\xec\xa0\xbf\xe0\xeeQ\x9f\xc6y\xf2?\x9a\xd9\xbb\xd1\x1b\xcf\xa1\xbfuR\xd5%\xbe\x90\xf0?N\x05\x80\xfe\x82\xaf\xa8?`\x9a!*\'\xfc\xea?M\x1e\x82\x88[\xcd\xc7\xbf\x01\xc1\x1c\x9d\xe5\xfc\xf5?\x13f\xc7kZ+\xc0\xbf\x0ev\xed!}\xe4\xf2?\xfc\x9en\xe8\x92=\xc2\xbfJ\xc2\x06\xf8ON\xf3?.\xbb\x1f\xf4\xc9z\x81?\xd5\x1d\xe4\xbc\xc9r\xee?\xb9\xe3\xff\xb7H\x00\xa6\xbfK\xed\x00!\xe2\x11\xf2?\xb5\xed\r\xdc\xd3C\x98\xbf\x04\x17Mi."\xf1?\xc2\x80\x0f\xb1\xaa\x1b\x95\xbf]\xda.a\xbe\xb6\xf1?\xdcuHW\xe3\xe8\x93?\xb8\'T\x81\x85\xe0\xea?\x97\xd8\xa7m\x01bt\xbf\xabv\x8a\x85D\x98\xf0?\xce\xd4u4\xf2tx?\xce\xc9,\x0b\x99\xbe\xef?\x1f\xc5Bc?C\xb0?*\x0b\xa6\xd1\x13\t\xf6?\xc4=\xd18*g\xa8?\x9bn\xc2Y\x8e\xd7\xef?j\x80\xebP\xa7\x81\xb3\xbf\xd1\x1c\xf9\x8a\xfbd\xf3?\xb3\x86a\x9e\x9fE\xa4?\xdfs\xfb\x85=\x88\xf0?\xf4T\xa9Y\xe7~~\xbf\xfb\xb68\xe9\xbe\xf4\xec?\xf2Ql\xee<<\x9d\xbf\xd8\xde\r\xcf\x8b\x1f\xeb?\xcb\xda\x85\xee\xb5@i?b\x16\x9a\xa5\x13\x1d\xf1?\x08\xa5?\x87#\xd8\xab\xbf\x11\xb07\x93\xd21\xf1? \xde\xe6=\xb6\xdc\x84\xbfH\xa70\xb5D&\xea?\xea-\xed\x8b\x83xw?Wx\xb2\x16-4\xef?\x08(\x98\xf55\x13\xb3\xbf[\xea\xdc\x9cJ\xfd\xf0?\xc9\xd8Y\x15\x8e\x1d\xac\xbf\x82kV\x9f\xb4\xf4\xf3?\xf3\x89n,\xbd:\xb0\xbf\xbb\x1e\x0eIJM\xf3?tD\x9f\x1d\xb9wq\xbf\xbfS4\x1c\'\xbf\xe9?\x88\x9b1T,\xe2\x96\xbf\xcc\x01\xae\x94b\xe8\xf0?Z\xfc^\x8b\xa3\xab\x82\xbf\x19M\xa9\xf2\xa9\xa6\xf1?\xce\xcd\x84\x06\xc1\x13\xce?F\xa0\xb6\x80\xde_\xed?t\xc7\x02\xa9\xe5}\xc7\xbf\x0c\xc9\xdb\x87Jh\xf7?J\xf7HJY\x01\xb6\xbf\x99\x91E_\x04\x06\xf4?M|_\xf6\x008\xa5\xbfS\xb3r\x8b\xe8\x9d\xf2?\xcb\x1at\x10R/\xad?pxR\xba\xc3o\xec?\x7f\x1f\xe4\xbb\x08\xd3\xb0\xbf8\x9f%5\xc0\xf8\xf1?\'\xaa\x00\xdby\x9f\xbc\xbf\xf4h)M|2\xee?b\xf5\xd1\xa8\x0e}\xac\xbfuF\x0bL=J\xf0?\x81^\x9c<Q$\xc4\xbf\xfe)\xc3-\x7f\xdf\xf8?K>n\xba\x139\xb5\xbfz4b\x00\xcf<\xf2?\xf8\xc4\x96fa\xc4\x95\xbf\xb7\xa8\x0e\xb6\x99\x84\xf0?\xf1E\x10\xc2\x9bE\xd2\xbfs\xc0~g\xbd\xff\xfa?v)\x00\xfa@\x02\xd1?6\xa4\x83H\xba`\xe4?\xa5\xf9<\xee\xb8Zl?\x01\x00\x13@\xeb<\xf0?\xa0mO\xea\x15\x8a\xbd\xbfG\x85\xaa\x80d\x11\xf5?q\xec.\xe0\x1c*\xb3\xbf\x02\xb6\xf8\xa5\x03\xfb\xf4?q\xa3Ka\xaf\x8d\xb2?\xc3>\x0fy\x1b\xf9\xec?\xeaI\xf4|}\xe8\xaa\xbf{\x8a\xdd\xca\xb5M\xf1?\x868\xe4\xda\x14p\xbb?o\xa0{{\x8f0\xf0?k\x03*\r\x86~\xb7?a\xee?n\x0f]\xe8?\xb5\x8d0\x94\xef\xa2\xa5\xbf\xde\x8c\xbd\x91\xf8\r\xf1?$8\xd8*;\x05\xa7?\xed\xa3\xcd6\xdcS\xe9?\xedB]\x05\x1c\x94\xa2?"K6:?\xcd\xe7?E\xa7P\xce\xd2\xa6\xd0?\x05^Fnk\x1a\xe6?>\x06\xca\xdf\xcd \x92\xbfe\xf7"\xe0\x9d$\xf1?\x1d;\xee\x0f\xe0;\xa3\xbf;?_\xb2\x83\xa1\xef?\nd\xfeT\xb3\x10x?\x94\x87#+\x0f\x03\xf0?\xe6s3\xd3A\\\x80\xbf\x072\x8eH\x1c\xe8\xe8?\x90\xcb\xc9\xf8\x05=\xbc\xbfr\r{\x98\xcf[\xf2?\xad\x0b\x8e\x89^o\xb2\xbf\x12V\xf2\x01\xb6\xcc\xf2?\x8faDOU+\xbe?z\x8a\xac\xe8(`\xe4?a\x16l(\xac~\xb5?T\x17Q\xf3\x94\x05\xed?\x19K \n\x07\x9f\xe6\xbfI%d-W\xdf\x05@E\xcc\xe9\x8d/,\xa7?-\xf4.\xe1M\xdb\xed?<\xa2i\x08\x04\x03\xc0?\xe0\xc2\xc0\x80\xe1f\xee?\xb4\x9d%\xcd\x9bFb\xbf\x11\xa6\xb1|\x17\r\xf0?\xc2\xe5\xee\x1f\xb0\x8c\xbf\xbfv\xce\x94M\xc8\xfc\xf0?Zb\xb6\x14\x1e\x03\x8c\xbf\xbd4\xe4\xc0\xfe\x8d\xf0?\xb9\x92\xb4\x0c\t0\xad?a\x86o%\x7f0\xee?\xa2x\x98\x89K>\xae?-K\x9d\xa4\xad\r\xec?\x8c\xfdJq\x90\x11\xc2\xbfE*\xacC\xd1V\xf4?\xads\x16|\x97\x17\xb0\xbf$0\x8b&\xf19\xf0?_\x8e?\xd1\xf7v\xd1\xbfS^\xae/\x9b~\xfa?\xd1wr\x11\xbe\x98\xb3\xbf\xddG\xed\x1e\x8ah\xef?fv\x8e;\xc5\xf9\xbd\xbf\x84\x99\x9b\xb4\x9a\xb4\xf4?\xa1wT\xc6j\xef\xc2\xbf\xa2\x94\t\xf9\x96\x81\xf1?\xe64\x9b\xab\x9e\x12W?\x0b.\x10\x8d%V\xf0?\r.\xc9\x7f\xa6,\x9b\xbf\xf3\xa6M\xac\xaf\xb0\xf0?\xfbI\x98\x81\xc69\xaa?\xe5\x9b\xe29\x129\xea?\x16\xcd-\xdc\xc1\xc1\x94?k\x8fv\xf1\xf8\x0e\xed?/\xec\xc0p\xab=\x8b?\x88\xaeq\x93/+\xed?\xaf\x08\x85~K\x18a\xbf\xdd:v\xb3\xb1\x89\xef?\xd7\xe5=\x8c\x81c\x86\xbf\x9c\x98\xe7pH\xd9\xed?bt$\xa3\x01S\xb9\xbf\x9c\x81Y\xb8\x11\t\xf4?=\xea\x19\xdc\xc9\xa7\xcb\xbf\xbb\xd2\xd2\xcew\xe0\xf4?\xeb\x84\xbf\xbaC\x91\xaf\xbfJ)J\xc9\x07E\xf3?3`=k\x9a\xaf\xbb\xbf\x84\xd5\xf2\xa8AB\xf3?\xe7\x9b\x8a\x8bG\xfa\xc1?|\xea6/\x8e\x06\xe1?\x92\xcf\xd6\x89\x84,\xbd\xbf\x07\x19\xdf\xe3t\x11\xf4?\xe1\x81\n\xf4\x8e\x13y\xbf\x80~\xde\x05\x17\xa2\xef?(\xa5\xfe\x19}K\x9c\xbfF\xb3%\xdc\xa3l\xf0?sxH5\xe9v\xc4\xbf\x97>\xc8\xdc\xad)\xf3?\x88\xed \xaer\x92\xc3?\x87\x1a\xf6\xde\xc6B\xf0?\xdb7M"\xa8"\xb0\xbf\x1aiC\xe5\x9fR\xf0?\x18\xde\xa7q\x1b\x96\x9b?\x8b\xa2\xcc\xbcu\x10\xed?<eT\x1e \xb6\xbb\xbf\xfe\xd7u\x14d\xfb\xf3?8I\x07\x0cOz\x92?\x99\x87!\xec0\xec\xee?\xc2\xd9\xe4X6\xcb\xb3\xbf\xd6\xa8\x04\xfdw\xb3\xf0?m$\xff\xea\x94X\xaf\xbf\xe5\x07\xeenG\xff\xf0?\t\x89x\xd2\xe7\xebQ\xbf\xa6\x92S\x97u\x8f\xeb?C\xd4\x86 \x10\xc3\xaf?\xc0\xe6\xf9\xb6\xd1\xeb\xeb?\xd3\xe7^\x94?\x8a\xc3?\x07|\n\x13\xae8\xe5?\\\xf5\xba\xd9\x7f\xbc\xb3\xbfvN\xa9\xd7\x07\x1b\xf2?-\xc9\xb6m[\xd7\xaf?lY\x92\xb5\x1c\x86\xe2?\x00\x1a<\xb7\xe4K{?\xad\xcd\x8cJ!\xac\xf0?\x8d\x14CS\xf1\x89\xc2\xbf\x92\xa6m\x8b\x97\x9f\xf6?\xdbL\x91\xf7,\x1e\x96?}\x86`\x89\xc5\xce\xec?\xb7\xc4\x97e>\xaa\xac\xbf\x17/\xf8>s]\xf4?>\xee\x05f\xa9P\x9e?\xec\x84\x0c\xdf$\xac\xef?\xd3\xb8\xc3\x00\x06\xd8\x99?\x85\\D\xf0\xd6B\xf4?\xa0*\x8dZ\x06\x9f\xc4\xbf\xc5\x94\xdc\xab\xb6\xe0\xf5?S\x14\x8b\x01H\x0e\xc9\xbf\x9e\x8a\xae<\xc5\x93\xf5?\xd2\x89%\x92\xdf\x0c\xd8\xbfM\xb5Py\x85H\xff?\x8a\xb0%\xacx\xa2\xab?\xa2\x1aIg\x90\xf9\xe1?\x85\x91p\x89\x08Af?;\xe0 \'#K\xf0?+\x9eN\x87\xcc\x155?S\xda\x95F\xadi\xee?(\\d\xa7-\x13\xaa?\xf50FO\xe4\x90\xe6?\x87\xf5o\x85V\x1a\xb8\xbf\xe6\x87\xc4]\xa1\xd1\xee?\x1b\xe6c\xad\xce\x02\x91?\x0c\\ \xfdR\xf8\xeb?09o\x9b\xc5\xd3\xc0\xbf$s\x1a\x95\x13e\xf3?\xce\xf0\x0cRBV\x95?c<\xb9\x14\xb4\x90\xf0?\xdc[0AH\xaeu?7\xc9\xef .\x01\xef?\xc4\xf5\xecM=>\xb9\xbf\x04\xfdQ(\x01\x9d\xf2?}b\x90Zj\x7f\x83\xbf\x07\xeb\x10\xf7\xe1\xc9\xf0?\x18\xd3\xa0\x96sa\xb2\xbf\x04%^\xf6\x0f\xa0\xf2?\xee\x9f\xc8\x93\xc6\x04\xc5\xbf\x0b\x9f\x8dx\x1d\xae\xf5?U\xa6]\xcb\x00S1?k\x84\x9c\xb5\x83D\xef?\x89XBG\xd1\x02\xb2\xbf\xd0\x97\x91P_|\xf2?\x0ef\x96\x84EM\xb6\xbfW\x87j\xe7\xaf\x9f\xf4?\xfc\xeb\xd1^I\x96\xf3\xbf\xbe\xbf~7\xc6+\x12@fC\x9eiq$\x9f\xbf\x88\xfb4\xc8\x19\xff\xee?\xa9~\xbf6\xa7O\xc3\xbfe"\xeee\xb2\xd7\xf4?\x80\xbd\xf79\xa7\x04\xc8\xbf\x11\xb7\xc7\xdf&\xfa\xf8?\x92\xae\x9d\xe3dN\xa6?\xa5M\x11\r\xf7\xd8\xee?\xb7\xf4\x19\xa5Yg\xa7\xbf\xb8\x80\x03\x0c\xd4}\xec?X}\x91Y\xcf\xc2\x9b\xbf\xe4\x97x\xff\x19\x88\xf0?\x8fA\xc2\xdd\xdd\xb9\xa8?hc\xe5\x03\xf0\x85\xec?]\xb3\x7f\x9eMG\xc2?\xa9J\x96\xd7\x80\xfc\xe7?\x17\xcf\xf4C\xc4\xd6\xc0?^\xf7\xb7n?\xa3\xe5?7C,\n\xb3Z\xc0\xbf\xa3F\xa2\xbd\xabP\xf5?W"%\xc1\xe2\x7f\xb6?\x08<\xa7\'w\xd7\xe6?o\xcf\xd5\xaa\xa8=\x9d\xbfO\x10\x91\x15G\x10\xf4?\x18-\xe2\x969D\xc1?\x85\t\xf1-0\x8a\xe3?c\xc2\xad\xa4l\xbf\x8b?\x86\xe8\xbe\xb8\xad+\xf0?,\xfbT\x82R\x9a\x9b?|\x08\xc4\xd9\xf9\xab\xed?\x82\x8f6u\xa0\xd4\xb6\xbfjm\x9at\x98\xdc\xf3?\xca>\xd6\x04PT\x89\xbf\x1d\x07\x98?=\x80\xf0?0\xbeV\x02\x84\xa3\xbd\xbf\xdc\xad:\x1f0\xbd\xf2?\x1dK\xfb\x1a\xd2\xb0\x8c\xbfM\xa3HB\x8a\x1c\xef?\xdfX\xbc\xb9\xddx\xc4\xbfn\xf9\xde\xfb\tt\xf4?\xe1\x15\x8d\xf2\xa3\xd8\xa9?\xf2.\xa9E\x1b\x05\xf1?\xc5\xa1k\x93Y\x9f\xa2\xbf\xbcL\x0fz?d\xef?\xb2a\x08\x9d\xbfF\xb1?\xcf\x19\xd0\xe3\x19W\xed?\x87@2\x84i\x19\xc1\xbf$\x81p!\x9dx\xf6?\xe8\x941OL\xd1q?G\x80\xe8\xcaF\x92\xed?\xe6(\x10\xf5aU\x8d\xbf\xd9~g\x7f\n\xaf\xf2?\xf3\x8c\x8e\xb3\x10\xcc\xc1\xbf\xc7\x17S\x88\xaaH\xf5?\xb7n\\\x02\xab\xba\xa9\xbf\xa54N\xb2\x80\xf5\xf1?\xd38\xbd\x94\xcdo\xc0\xbf\xc7_\xcf8h\xff\xf5?\xb8\xf5\xe2\xd5\x81Z\xb1\xbf\x03\xee\x1a);2\xf2?\xb0$2\xfe!>\x8d?\xc1\x8dku\xe4\x17\xe8?\xc7\xa7\x0bS\x07|\xd3\xbf\x8d1\xb2P\x95f\xfa?\xf6\xf8\x97\x10=\xda\xc8?\xac\x85\xafO\xe4\n\xe2?\x19X\x8a\xde\x84\xd7\xb0\xbf@^T\xf4]&\xf0?\x1ai\xfa\x87X\xa8\x90?\xe9\x9c\x0c\xb26\x11\xed?\xd0\xaeD\x82\xdc\xda\xab\xbf\x89\x13R]\n}\xf1?\xc4\xc6\xdb\xf2\xfe\xca\x99?\xd3\xba\x12\x8dWh\xeb?2Ls\xafS\x19\x9e\xbf\x88j\x8f\xe7\xb3\x86\xec?\xf9Q\x94\x00$\xdb\xb3?;\x1cK\xd9\x90\x02\xe3?\xfd\xb2\xc0K\xadF\xb2?\xd92\x91\x00\'\x85\xed?\xc4\xe7I&\x17&\xa3\xbf\xcc\x82\x81\x19\x05"\xec?\xfd\x0c~r\x85\xe2\xef?\xe2S\x0eeM\xdb\xc8\xbf\x00\x82.\tD\x94\xd0?{\xbc!\x07\xc7\x18\xe4?\xd0\xb9\x84\x8d\x1c\xfa\xcc?\x06\r|\x10\xf1\xc2\xf1?\xb9\x8e\xec^P/\xc9\xbf\xfe\x80\xdb\x07\xdc\xb4\xf7?s\x99b\x11f\xdb\xa9\xbf\xb2\x920\xa4\xe9\x19\xf0?\x07P)\x07\xce\xbc\xbf\xbfL\xf9l\x8e\xb5 \xf3?\x9f\x18\xa8L\x16\xe4\x97?\xae\xab\xf8\xb7\xb1\xba\xec?\x826\xa7\x86\xe2i\x8f\xbfH\xc8\x84T\x80"\xef?\x05*Y\x05\xa3\xe4\xb1?6X\x15z\xecv\xe8?\xa7\x95azZ\x8e\x97?\tS\xf2\x1an\xf0\xf0?X\xd1\xfaK\xe5\x07\x88\xbf\xf2\x08>`\x92\xb2\xe9?1\xd6$\xe6\xf8\x15\xb0?\x1d\x7f4d8:\xe0?\xfe\xad\x8a\x1a\xc2l\xab\xbf\xc0\xb0\xbeT\xfb1\xf1?\xbc\x1e,\xfd\xbe\x90\x9f\xbf\xe8\xd2\x10\xaadC\xf1?:\xe3\xe5\xf49v\x9e\xbf\r\xc9\xba\x95\r>\xef?O_\x03O\xbb\x86\xb0?{\x02JR\xe8\x1d\xed?\xafe\xc1\xca\xe44\x93?\x14\x84X\xc8\x0f\x82\xef?\xdb\xc5\x13\xf7d[\xb5\xbf\x99\xfd5\x06\x15E\xf5?\x88\xea?=\xa6\xc9\x8e\xbf\xf4U\xb1\xe2j\x90\xf0?n\xcf\xaf\xe2yU\xc2?\xb4\x88\x83\x17d\xf6\xe4?v\xc1\x1ch\x0c\xa2\xaa\xbf\\Jt\x07\x92\x18\xf1?\xb4\xc9\xad?\xd0\x80\xf0?\x05\xecp\xe5\xe4\xac\xb7?Yvz<\xe8H\xab\xbf\xb8\x05\xab<\x03\xcc\xef?\x820c>\x83i\x99?slp\xd1_-\xef?\'\xae\xe4\xe9\xf3u\xc4\xbfzWS\x7f\xf8\xb5\xf5?R\xd6/\xdbBy\xa2?\xb52y\xc6\xcdr\xf0?Z\xca\xb0\x94\xe1>\xaf\xbf\x81\xfa>0;\xef\xf2?\xcd\xa8\xbc(\xbbkE\xbf7\x85\xbb0r)\xf0?+\xa8\x0eGP\xa8\xa0?3\x18\xbe\xd5Q7\xe7?d\xbb\xd3\xc0\xd8R\x91\xbf\xdf\xdf\xa0\x9bU\x85\xef?v\xea\xd7\xc0\x0b\xe2\xa7?\x05\x9f\xf5n\xaa\xa6\xea?<\xe7\x91H\xc6\xba\x93?j\xd7.\x94\xfe\xf8\xee?\xb9P*\xc3\xef\x9f\xd2?\x81\rX~\x111\xe4?\xcaY\xe8\xb1\xac\x97\xa0\xbf\x01`\xfa\x9e\xe5j\xef?\xa2\xd6\x97\xb8\x08\x8e\xcf?;"\xabM\xe3$\xee?9\xccN\xbc\x16\xd7\xa7\xbf\xac\xba\xdaT\xd9\xf1\xf3?Z\xaes\x16c\x02\xad\xbf@\x15\x81\x1a\'%\xf0?\x8f\xf1\x7f\xb44\x02\x8e\xbf\xc4\xc8O\xd4\xe8\x10\xf2?\xadA\xb8\xfa\x9aD\x8a\xbf\x03r\xfbx\xb7\x8c\xef?\\\\\x07on\t\xa1\xbf:\xf5~\x003\xdf\xef?\x04?\xf5\xef\xc4\xc4\xb6\xbfq\x81\x85"\xc9K\xf0?\xc1o\xe6\xef\xe6#\xc5\xbf\xa15\xf9\x0bbP\xf8?\xb4+\xf0\\\x02)\xcb\xbf\xd7\xfe%`E\xf5\xf7?\xa9\xdex\x06\xaf\x94\x9c\xbf\xa5\x04\xe1\x9b=\x0c\xf0?\xbdud\x1e\x9c\xaa\xaf\xbf1\xea`\x10ac\xf1?xd\xe3\xa7\xd3\xd7\xab\xbf*\xfa\xe4\x9d T\xf0?\x88O\xb6\x8b\x06\x8a\x97\xbfNFn\x13\xdf\x8f\xf1?gZM.\xbc\xe2\x9d\xbf\x98\xb4:u\xf3\x97\xeb?:z9>\xf7\x10\xaf?O]Z6L\x0f\xf0?5,;\xae4\xd7\x92?\xea\x857\xf8\xac\xd0\xe7?\xfb\xdd/e\x0f\xa0\x9c\xbf\t\xbd\x16|\x8e\x95\xf0?\x8d\xf3\x14\x18\x82oh?\xe8\xab\xc8\xf5\xa4\xa3\xed?u\x1f\x13\xca~6\xaf?\x8e\xd4{\x96\xf1\xb2\xe9?R\xf6}\xff\xba<\x8e?\xc2|\x80\x85\xc1%\xef?\xb3\xf1\xd9\xd5h\xa3\xb0\xbf(\xc7\x88\xaao\xe3\xf0?\x85NE@\xc1\x82\xb2\xbf\xe2\xf0\x85\x8c\xa3I\xee?)\xef\xc5\xdb\xf7`\xb1?A\x95\x06A\xe8\xb7\xed?\xd4\xb7K\xd0w}\xc0\xbf\xe4\x00\xe89\xa0\x9d\xf2?\xa7\x95\xa5\xf9\xf6I\xb1?\xbb\x11rM\xc1\xac\xeb?\x8e\xe9\xdf\xf2\x98\x08\xc2\xbfKC"\x94*c\xf2?\x1d\x15$\x98\xb1\xdf\xc9?,K:\xb5\xcb\xb7\xe7?\x96\x89N\xcd\xe3\x18\xc3?Df\xcf\x80[V\xe6?*\xa6\xd4\xd0S$\x96\xbf\x0e|\xf4~\xe1\'\xeb?\x9c\xdf4\xedv\xa1\xcc\xbf>O\xa5\x9c\xac\xcb\xf6?\x9c+c\xd6d\xcdt\xbf-\xdd\xb4T\x01|\xf0?$\xd3\xd3\x9c\xda~j?\x9b\xbb\x03\x02\xab4\xee?\x8e\x07A^,\x7f\xac?\x9d\r\xdb\xb5\x9d\x1f\xec?\xfdX\xcbo\xe4\xb4\x84\xbf\xe8\xd6Q\x03\xe5\xe6\xf0?\xb8)\xe3v\x93\xf7\x7f?\xfb\xfd5St\xdc\xe6?\xbc\xa9\xfc\x01\xd0\xdc\xa2?b\xc7\x91\xed\'\xe0\xee?0Y\xbb\xb0=>\xc7\xbf\x8b\xa2(Y\x01\xd7\xf5?N\xdc.\xdcU\x94\x9e?\x7fk12\x16 \xef?eV\r\x01\x7f\xb4\xc2?u\xe2\x91\x125\x89\xf1?A8\xcaB\x9em\xc0\xbf/\x8a\xd0`N\xea\xf2?\x1b\x02!8\xcc\xd2\xb5\xbfW\xb2\x85+\xbb{\xf3?\xc7\x11\xa4\xe9e\xf2\xc8\xbf:~\xfc\x0cH\x86\xf1?]\xcf&\xcb\x10\xb7\xc5\xbf\x9a.\'\xda\x19\x88\xf9?\x92\xdf\x01\xfc#\x9fX\xbf\x80\t\xb0\xcd\xc0\xb4\xf0?.E3\xd9?k\x9e\xbf\x97\xfb\xb838]\xf0?\xec\xae\xf4\x08/\xc7\xc9?\xde|\xa3\x16~\x1f\xe5?\xe1\xbf\xc8b\xf8\x0f\xb1\xbfe8\xe8$\xe9\x1f\xf0?z\x92P\x8f\x0f\xb0\xd2?9tNo\xf4%\xf2?\xe1&%\xa4c\xb2\x98?\x96_\xf9\xa0%t\xeb?\xae\xb3\x0c\x1e\x8dM\xae\xbf\x95\xfb\n\xa4<\xf2\xee?:\xfct\xb7\xd3\xf8p?\x0br\xe5\x0c\xd8\xbe\xf0?0\xc1\xe2\x08\x19}h?\x022\xd7\xb8\xe2Z\xec?\xd5\xb4\xfa\xf5.\xc4\xbf\xbf\x94\xd5\xa4X\x1a\xdf\xf1?\xc2\x8dH\'\xa6kT?\xe1s\xc7\x95\x0f\xab\xef?\xae?\x9ft\x90\x00\x91\xbf2\x97\x13#\xe1_\xf0?\xcd\x08\x1c\x10&9\x96?K\xb8\xc2R9\xf0\xee?\xb6\xdd\x82\xce~\x88q\xbf\xf7\x05\xe5\x81\x04\xc9\xf1?\xc8\x81N\xa0\xcd\x85\xb3\xbf\xb4lVK\'\xdc\xf3?\xb4\x89&\x7f+\x8f}\xbf\x15\xe2\xff.\x13\x90\xef?\x7f\xff\xe4k\x11P\xb0?T\x17\x1c\xba\x81\'\xf0?'
p136
tp137
bag2
(g3
(I0
tp138
g5
tp139
Rp140
(I1
(I2
I438
tp141
g12
I01
S'\xb41R\xef<\xbd\x9e\xbf\xffu?\xd7\xeb\xf9\xee?G?\x8b\xfb\xf2\xf0\x95\xbfr\xb8s\x8c\x1el\xef?\x87\x08\x16\x16\x8e\x97\xad\xbf\xe8`\xb3\xb5\xe2\xd2\xed?\xe1\xb6\xd9\x9a4\xa5\xcb\xbf\x17]\xa5\xf6O\x12\xfb?\xa2\'\xfag*\xfb\x84?\xfe\x80\xcfz\xdc\xbf\xe9?Q\x14M0I\xe8\x97?\xf2c*#\x9ad\xe9?P2\xedC\xe6c\xae?W\xbas)P\x7f\xf2?p\x9c\xf5@\xd6\xd3\xb1?\x0cz{jB\x99\xea?t\xd2QJ\x11\x18\xcf?r<\xb7\x15\xb2\xea\xee?`\xa8\xb6!\x1cJ{\xbf\x0e\xc1@"A\xd2\xee?h,\xa3\n\xa2\x9f\xc0\xbf\xe7%\xcfkwt\xf0?\n\xd7\xd23\xaa\x13\xb4\xbf\x92|B\x9e\x86:\xf2?\x85S\xdfH{\xb5\xa6?\xba\x1dR\xe2\xe7H\xe8?\xb0\x12yJ\xed\x04\xb9\xbf\xd8\xba\xa9\x84\xec\x0b\xf1?\x97\xc7n\xdd\x8a\xf4\xd0\xbf\xf4\xa5\xaa\xf1#\xe9\xf4?\x86\x06k\xb7\xec\xe9\xb2\xbf \x1d3\x8dWs\xf4?\xf1\x94\x83\\\xbdK\xa3\xbf\x8b\xab\xfbt\xe9\x18\xef?\xe3\xd5\x08\xb1\xbd\x97\xbf\xbf\x0b\xc9\xfa\x05n\x05\xf2?M\x11\xa0\t\xbd=d?\xe4e\x86\x17\xa7\x82\xef?\xc7\x1esXlk\xac\xbfk6\x95\xfe*\xda\xf0?\t\xd6\xc3M\xe9.\xa3\xbf\xb1\x8f1x\xeb\x02\xf1?c\xbe\x10,A\x0f\xbe?\xae\xfe\xdf\xb1\x05\xd2\xe2?\x9fr\xec\xf8\x9f\x0e\xa7\xbf\xb4h\x13\x8e{\x9b\xf2?C\xd6\x07\x8e,j\xa1\xbf\xc2\xc3\x8bO\x08C\xf1?\x15\x92;\xa7%\xa3\xab\xbfw\x1b\xcbVD\x9b\xf1?\xf1\xe1y\xff\xb8\xa0\xc3\xbf&\xf6Kj\xae\xa3\xf4?\xd04\x89\xb9\xea\x8c\xb2?\xd1\xe4\xbd\xc5"\xa1\xf0?G\xbe4I\xb6e\x9f\xbf\x1c\r\xc6\xdb\xca\x8e\xed?\xa4\xb8m\xe6\x9bJ\xa2\xbf\xa2\xa68\x1a\xd4\x1b\xf1?\xac\xca;,\xcf\x0e\xa7\xbf\x8a\xc1,\x9b\xb5:\xeb?\xce}b\x90;\x91\t\xbf\r\n\x92\xc2j\x99\xef?U\x0e\x03\xd3\x90C\x96?\xef\xa7*G\x9f\xef\xec?2\xdeM\xc5\x1c5\xb5\xbf\xc7;a(\x1a\xbd\xef?\x1c\x02\x14\x8d\xa9\x7f\xa2?\x9a\x19\\\x9dpu\xe3?2\x00\xe3\xec\x87\\\xa4?\x7f\xe1\xa4\xcd{\xa8\xea?S\xf3\x8f\xc8\xf7\xd2\xa4\xbf\x8aHX.`\x0e\xee?!dI\xc8\x1e\xdb\xa6?vi\xa1\x80\xe8\xdf\xe9?\xafQ\xbd\xaa\x12\xa8\xb4\xbfg\xd0r\x82\x02\xd0\xf2?\x00\xfbel\xc8!\xb3?\xe6]\xb6)n\xcb\xea?|\x8e\xbb\x17\xa2l\x81\xbf\xaeP\x9cK\xabg\xeb?Z=\xbf \xec\xf1\x90?k\xb2\x10<\xfa\x8e\xef?\xc4\xb7\xc1\xda\xcd\xb8\x85\xbfu\x00`\xa6\xe2;\xf0?,+/\xea\x1a\x1e\xc4\xbf\xa0\xd9w\x88\xe3\xd8\xf5?\xb1E\xc098\xaa\xc7\xbf\xd7*\xcciR\xfd\xf3?C\xef\xe8\xac\x1c\xac\xa2\xbf`\xb7\xc5j\xb36\xf2?~h\x86<\xbd\x08\xac\xbf\xaf\xe6\xa1\x06\x06D\xf1?\xc3\x05\x1fn&\x19k?\x10\x9d\x9f\x9a\x9c\xe6\xee?\xc9\x98j\xdb*W\x8c\xbf7V1wy\x06\xf1?\x10\xe4S\xf8\xa69\xcd\xbfz\xf9\xae\xe6O\xbc\xf8?\x0b\xbfe\x9au;\x9d\xbf\x9c\x0f\xef\x8e4\xc5\xee?\x93;\xff2%\xed\xbf?.\xef\xb2\x0f\x13W\xea?\x90\x9cY4K\x9c\x8e\xbf\xb2\x9f\xa00\xf7\xfb\xf1?p\x7f\xe0\x88\xf6\xbf\xa1?\xcb\xa6\xea_\xb4\xfe\xed?\t\xb7\xf9\xa7\xe2\xd3\xa8\xbfx\xe7\xb0g\x99*\xf0?\xf5\xd39Q\xa2\x7f\xb5\xbf\xb8\xb2!6\x04\xc6\xed?\xd6\n\x07\xa3j*{\xbf\x87\xfbJ0{M\xef?fb\xce\xc2\xfce\xc0\xbf\x1eL\x1d\xe8Xv\xf3?\x0e\xb0\xaa\xb2\xcf\xae\xc0\xbfd\xfe;6?1\xf2?q\x99w\x13Y\xd0\x9c?5\xc2w\x1dm\xef\xef?\xf6\x0c\xe1\x0b\xc8\xf3@\xbf7\xc79\x97m\xb7\xeb?\xc4\x18\xf7?/\xc2\xb7\xbfF\xe6\x97\x81\x11b\xee?\xc7V\x0ee\xd4\xe7\xbd\xbf\x0e!\xdf?\xd0/\xf4?\xb3\xc5\xea\x7f\xea2\x90?t\xb2ZH\x9d\xaa\xe9?t?\xca\x020\x84\xa8?eiE\\M6\xed?\xacJ\xb3\x94\xbb\x81\xac?9\xdb\xbe]i \xeb?\\\x0e~>,\xb2x\xbf\x17\x90\x9b+0\x95\xec?Kv\n\xd1\xd8\xd3\x89?\xadCS0\xb2\xa6\xec?\xffT\x0c\xec\x81\x00\x91?j\xe6.\xc9d~\xec?\x88v\x98\xbbpv\xc2\xbfK}L.1\xbb\xf0?r\x85(\x94:\x07\x87?\xddR\x81\xff?\xb0\xea?\xcb(\x03\\x\xd1\xb8\xbf\xdb\xc1\xd0\xf5\xc6\xad\xf5?\xd1_\x11\xf93\xe8\x99\xbf\xf7(\x1c\x97\xdfj\xf2?\x11P\x1e\xa7\xf9a\x8f\xbf\xcf\x0e@\x9a\x0fz\xf2?2x(B\xb7S\xa4\xbfQ\x91;\xac\x88\x05\xf0?<\x81\x84E\xe6S\xc2\xbf\rc\xacm.\xa8\xf2?\xf3\x07\xc3\xb3\xd2\x8a\xa2?\xd6\x1d\xcdj/\x99\xf0?\xc3(z\x81\x85(\xb9?\xe9\xee\r\xd8\xd1H\xed?e\xbe\xc4\x1c\x8f\xb5\xc1\xbfWN\xa5y\xa4\xc2\xec?\x84\xf2\xf1\xfd\x82\xe7\xd0\xbf&\xe2\x05\xed\x1f\xef\xf4?cN\xe1\xf0q\x7f\xba\xbf\xb2\xc1\xa9\xb7a\x15\xf4?>\xe1z^L\x9e\x81\xbf\x98\xd3\xc5\xca\x1d\xda\xec?\xb5\xb9L\xd1\xa1\xdb\xb1\xbfI\x07\xe8\x96\x1e\x95\xf0?rk\x04|&~\xc0\xbf\x19\x00\xd0@m-\xf6?\xc2?\x1f\xf8\x1d\xe3\xa3\xbfT\xe0V\x9c\x94(\xf2?\x8e|\x02\xfd\x16zo?\xab\xf47\xcb\x1e0\xf0?\xdf\xafp9\x95D\xa9\xbf$\xe11a\r\x1f\xef?\x88\xd1f\xbb\x8f\xb8\xc0\xbfMP:"\x01\xfe\xf2?\xa3\xcd\xd7\t\x04>\xa1?:\x83\x90\xed\xacV\xee?\xe1b\x89\x9b\xf5\xb0\xca\xbf\x03\xd5\xe3\x97n\x9a\xf3?`\x83)\xd4\x1e\x8b\x99\xbf\xdfV\xa4V\xddo\xe7?\x04z\xf2&\xad\xb0\xa6?r\x97\xc6Z\xff#\xe6?l\x87\xbf\x95hm\xa6\xbf\xcd|\x9c\xf7\xf6"\xf1?\xbe\x93\x9a\xa5\xc9t\xa2\xbf\xfay\xfay\x16\xdb\xed?\xb3?w\x1f\xcf\xe1\xaf\xbf8\x04T:\x06\xf8\xef?&B:}\x82\xe2\x87\xbftI\x15\xd2\xfc4\xf0?brM\xb0p\x8d\xbe?\xb8\x88\x9c\xe8\xb2O\xe5?\xfd\xf6\xa2;w\xaf\xa0\xbf\xea\x0b\xe9@\x1f4\xf2?\xe0[\xb4\xcd\xce\x00\xc5\xbf\x8a\xea\xc1\x1c}\x8e\xf4?\xda1t\x94\x11\xea\x89\xbf\x86\xdfp\x0ep\xad\xf0?]\xc8\x0f\xedP\xf3\xa0\xbfOi\xe0\x18zr\xef?\x12\x04;\xde4\xc9\xb1\xbf\t\xbd\xcd\xa7\xc81\xf0?W\xf3\x9d\xeaX\xb1\xd7?x\x0ccv\xfc\xa3\xd8?J\xb3\xea\xa0\xb5\x8c\xc1\xbf\x9a\x88\xafs\xfe\xaa\xf3?\xc6\xa3G\xda\x9c\x9b\xb0?\xd3\xda\xa5\x07\xdd\xeb\xe9?)\xd8\x96O\xf7t\xd3\xbf\xe2\x04\xbc#\xd1!\xfe?\x19!C\xfa\xaf\xb3\xc6\xbf\x7fzpqo\xe0\xf5?\x95\x97\xfe\x167X\xbd?X\x82\xc9\xe8\t\xc5\xe6?\x11!u\xc0\xdeG\xc4\xbf?\x10kuN\xb6\xf5?\xd1\x0c|\xc8\x94\xb1\xbf\xbf\xbf\x00\xdf\xc9\xeb\xdb\xf4?N\xf5\xde\x89\x87U\xc6\xbf\xc2 \xb3\x88\x97\x89\xf4?\x0bT J\x9a(\x9c\xbfP<7\x95\xb7\xe9\xee?\x9c\xf8\xa4\xf5\x9b\xb2\xb1\xbfg\x84q\x9e\x08X\xef?]i\xe1\xad\xbc\xf3\x97\xbf\xe6\x98\x04\xd4\xfau\xed?\x14\xa7\xbb\xab<\xdd\xb3\xbf\x96\x13\xc1rk\xbe\xe6?\xa6=\x82US\x1a\x96?,@t\x9a\xea\x03\xef?\x16\xe9\xc5<3\xda\xc4\xbf\xfc\xb73\xd1\xec\xf4\xf6?\xb4C\x064\x04\xf2\xa5?\xcb\xce\xf7\xc5\x8e\xd1\xeb?f\xa2\xba\xfa\x06\x06\xb6?\xd3\x08G\x0e\xd5B\xdc?${[\xcb\x16\x15\xa6?\xe0GD\x80\xdb\x19\xf0?\xfcr;\xd3\x9f\x0b\xc4\xbfp$o\n\x12i\xf6?\xa1\x12:\x94\xa3\xeb\xa6\xbf\x0eb6jF\xb8\xf0?\xb1mY\x86!\x84\xbc?|$e\xde>K\xf0?]dW{U)\x96?\xb9\x9c0\x9c5\x8d\xec?\x1f\x06}\x13<md?\xa0-Vz\xbc\x1b\xe9?r\x88\x0c\x19G\x1d\x9e?\x0b`\xfb8\x82J\xf1?\x03\t\xb9\x15wV\x9d\xbf^4M\xc8O\xcb\xf0?Q\x19\xe5\xa0\xa2Z\xc9\xbf|N\x1d\xae\x1b\xf7\xfc??]\x99\xe2\xe3[\xc5\xbf\x07\xd7xl\xe7j\xf3?J\x89\x08\xf3c\xad\xaf\xbf\x14\xb3>j\xb9\xe9\xf1?\x12\xe6y|\xbf(\xbe\xbf\xd4\xa9\x1b\xc9\xc3,\xf1?;{4\xcfu\x00\x85\xbf\xb0m>\xdf\xa5\x14\xf0?=r\xb3\xba\x9e\x87\xbb\xbf=}\xfd\xa6\xf4\x87\xf2?=\xa8a\xbf\x94v\xa0?\x84\xa1J_\xb4d\xe9?\xf5\x81\xba\x17\x12\xa6\xbe\xbf\xb3\x0c\\\xf5\x16\xd6\xf0?\'\x0c\x0b\xbe\x16\x11\x82\xbf3\x01\x1b[\x92r\xed?\xaa\x9d\xf7xZu\x97?\x95@\x98\xea\xeb\xde\xea?+\x05\x9c\xb9\xc6\xd8\x93\xbf\xd2\xcbB\x1f_\xfd\xeb?D\xdf\x85z\xdd\xc6\x88\xbf\xa78\xc2\xac\x91y\xef?\xfa7\xabM\xd8O\x86?.Lq\xae\xf5\xd8\xef?\xe1x\xd1\x0cs\x13\xc2\xbf\xf3\xe1NX\xfe\xb2\xf2?(\xa2\x86t\xaa\xf6\xc9?\xf5\xaf\xd2\xa7\x04\x07\xef?\xee\xe0ra\x9ca\xc3?\xe3\xcd\xa9\xc6\xd3g\xd9?\x82-?+\x12\xb5c?\xf6\x06\xdc,Ji\xed?yn\xe8\xf2\x1c\xd3\xc4?\x12A\xb8\xcf\xf8\x93\xe3?\xbf\xa8\xfe\x1c\x83\x98j?\xed\x00\xcexHK\xea?\x8e`\xfe\xf1Hn\xb1\xbf\xe4\xe7{\x11\xd5d\xf1?c\xc8\xec\xd2\x0b\x8c\x89?\xa7\xa7\xfbn\x0f@\xf3?^\x94\xd9\x18\x0c|\xb8\xbf\x9c\xa6)\x00\xb9\x99\xf2?\x11\x1bi\xc2\xe2\xdb\xbc?\x9c\xa8\n\x8f\xb1\xed\xe1?p\x92\x8f\x9c3\xbd\xa3\xbf\n\xbb\xd6\xb5\xf8\xce\xf0?\x8a\n\x1by9g\xa0\xbf\x98\xccT5~\x9a\xed?\xb70>_o\xb3\xa1?\x85\rq\xbb\x8e\x1c\xe5?0XA\x84\x92b\xbf\xbfV\r\x89G;I\xf4?u\xd4\x07\x9d\x06\x0e\xc8?I\x1e\x9a\xf11m\xe9?u\xa5\xeb\x06\xe5\xa1\xc3?\xf61\xff\x13\xd1I\xed?\x96\x1c\xe9\xcbb\xd3\xc1\xbf\x88J\xae\x85L;\xf3?\xb6\xdc\xbcQf\xe1\xba?\xfaKz\x7fzn\xf0?\xf5<\x19m\xeb\xe9l?%b\n;~\xd1\xf0?\xbe\x94oiih\xb0?/\x04sQ\xdd \xea?\xc9_\x83?\x82\x91\xbe?t\x08\xa1\xa9jG\xe0?\x97\xbc;\xf7\xe8\xde\xa1?_\xac\xecE\x0f\xab\xeb?\xcb\x95\x8a\x9ec\x0f\xc8\xbf:x5\x01\xf2\x9c\xf5?\xa7\x8d\x9e\xabh\xf0\xa9\xbf\x97\x1b,\x9e\xd7\xe6\xf1?-\x8a\x10\x1ay3\xbb?\xde\xfa\xe0<\xe2\xab\xee?\xed\xdc\x04\xb7Q\xbd\xb7\xbf\xca\xdc\x90+Fp\xf3?\xe6\xb3\xdeb\xd4\xe6\xce\xbfl3V\xd0\xa6!\xf6?\xeb&o-#\xcf\x96?\x1d1\x82\xfa\xc9\x10\xe7?\x15(\xef<\xed\xda\xa0?w\x86\xcd\x12U\x07\xec?\x85\x12\x87\x172\xec\xa2\xbf\xe0sK\xe3"\xaf\xef?`y\xb0\x934#\x9c??\xf9\xbe\t\xbf\x80\xea? \x05\x87^\xb4<\xc2?s\x1c\x17\xeb\xd2\x9b\xe7?\xecX\xc1\xa0\xa2|\xaa?\xdd=\xc4(\xbd\xe0\xef?p|\xe6\x85\xe0E\xba\xbf\x1c\x99`\x99\xb3\x08\xf3?\xb1\xc8D\xaa\xcay\xc2\xbf\'\xf7^\xf4\xe1\x91\xf4?\xd9\xc7\xa6\n/\xa7\xe4?\xd7,w\x84J\x93\xd1?\xf7\xa4\xc3`\xfaV\xb0\xbfW{\x87t\x8c4\xf2?\xc3\xc1R\xc0\xa6\\,\xc0\xc7\xba`\x8b?\xe8E@\xdeA\xe3v{\xcc\xa4\xbf\xb2\x84\xba1\xfc\xfb\xf1?\xa3x:\xf8@\x08\xc6?\xe1\xd3\x8f\xb4\x88\xd3\xe9?\xf3S\xa0\x9b\xe7C\xa7\xbf\x14\x14~\xb4/\x88\xf1?\xa1\xdd1r\x9b\xed\x88?\xe4jH\xc5\xad\x81\xf1?hj\xe8/q8\xa2\xbf\xb6#<8\xa3\xe9\xef?\x7f\xcb\xa3\xf7\xc1\xd9\xab\xbf\xab\x0ci,f%\xee?!z5\xd9{\x1b\xa5\xbf\x875\xb2-\xed\xdd\xf1?\xb9\xdct?\xf5\x0f\xdb?\xf5\x19\x1fU9]\xd0?\xee\x8c\xaa\xb3w\xa9\xba\xbf\\\x85\xf4\x08\x0e\xdb\xf1?\xd7F\x81\xc0p\\\xa2?\xd4<7\xa8\xd9*\xef?j@\xb40\xb0;\xca\xbf\x95\xa7\xfd\xbd\x86\x8d\xf6?\xad\x1c\xf0\x0c\xce5\xa7?\xed\xdfP1\x99\x19\xe8?_\xa7r\x8c\x1f\xf1\xac?\x91\xda!K{t\xec?\xcb\x13M\xe4\xae\xa8\xbd\xbf{\xeb\xd1\xb1\xe6\xfc\xf5?\x05\x11W\xa3n:\xa4\xbf\xfa\xe1tb\xf8\xa7\xf0?\x84\xef\xfe\x0f\xf4j\xcb\xbf\x86\xdf\xb5\x97\xb4\xf2\xf2?\x19Cw~\xdfS\x9f?\xd6I\xaf\xdf;\x99\xec?\xe7#\x10i\xe7\x93\xc2\xbf\xc7\x89\xea\xd3\xc8\xfe\xf1?\x1a\xe3m\xda!\xbb\xc7\xbf\x87\xa6\x9b\xd9\x9b]\xf1?M\x86go\xb9\xaa\x92\xbf\xb2\x86\xadT\xd4\x1b\xe8?@\xf3\x0f\xb09R\xb4\xbf\xb4\x1c\xd4\x13Z\xaa\xf2?\xdc\xe5\xcf\r\x89\xe2\xb2\xbf3F\xef\x1bi\xe5\xef?\xda~\x0b8,\xe8V\xbf\xfd,6f\xacR\xf0?\x03\xb7M\xd6\xf82\xb9\xbf\x83\xa9\xd7\x1e\x97\xdb\xf0?\r\x03H\x8f\xe2\xe9\xae\xbftmL\xbf\xa9!\xf2?\xa3\x878\xb6\xce\xb3\x9e\xbfL\xb9\xf61\x1bS\xf0?[\x08>\xab+\xc0\xa3\xbf\xf6\xc4\\gKM\xec?\\M\x04g9\xdf\xc4?\x9d\xa65\xd2\x1d\x9e\xde?\xbc\x9a1\xd0\xf1\xc4\xb1?M\xb0\xc2\x8e6^\xed?\xcfG\xfc[\x97$\x90?d\xfd\xa1\x9en\x95\xea?\xc4\xe4\xff5\xc7\x13\xbf?\x8b\xc1\x93\xa6\xbf\xd6\xea?\xdf\xe7\x1eC\xeb+\x8f\xbf\x95C\x05\xb0N1\xf3?\xd6:\x1c\xf80\xd4\xc1\xbf\xed9\xfcw#B\xef?0<\x1d\xb7~\x93\xb3\xbf\xf2\xd9\x18\xfc\xe7s\xf2?\x1e\xcfB}\x98 M?\xd88WOW\xa6\xf0?o2\xce6\x99Q\xae\xbf\\\xa2\xeeYK\xf4\xea?\x9b\xe2.\x95\x0e\xab\x93\xbf^\x181vM\x1f\xf1?iX\xf7@N\x1cF?\xc1\x9bu\x98,w\xf2?\xefH\xd8\xca\xc4\x8f\x97\xbf\x92-sk\x9c\xef\xf0?\xa2m\xa0\x12r\x12\x8e\xbf\x99\xbd\x07{.Q\xf1?LK\xaf\x06H\n\x9b?G=;\x94@.\xe6?;%\xfaF\xf9|\xb8\xbfK\x94`)]e\xf5?\x98A\x03\x93%n\xb2\xbf\xb0hb-\xae\x1d\xf2?\x10E\xa9(*\x02\x91?\x92!_r\xf5\xa0\xee?1B\xf7D.\xc2\xab?\x13\x95\xfckeX\xe4?\xdc\xc4Nw8\xa1p?\xddO\xce\xd5P\xf0\xee?\xe8q\x11\xb5%<\x8f\xbf\xfe\xf1\x91\xef\xc4\x8e\xf2?<g\xf8B\xbf\xdf\xbd\xbf\x97e\x8cW\x8ae\xf5?\xd0}\xa6\x86\x1b\x15\xb1\xbf\\\xa1!\x87Ck\xf0?\xf6UV\xe8\x1cm\xa1\xbf\x0fh\x03\x94S\x85\xf2?\x11\xe2\x0b\xeat\xc7\xb9\xbf\xdb\xe4b\x14\xae\x1c\xf2?K\x9dvG\xe1\x8f\xa3\xbf\xa0L\xad{2\xc6\xed?\x86\x9d\x83\x81\xcd\xbd\xb0\xbf\xcd\xb5[\x8a\xfc\xdc\xf1?\xdbu\xd7\xe1\xbf\xf3\xb6\xbf\xe5+HV\x19\x80\xf2?"FX\x94^c\x92?\x17otj\xa3\xa8\xef?\x96\xd8\xee\xe4K\x0e\xbf\xbf\xa1\x91\x10P\xcf\x8b\xf4?^\x11\xcf\x8eM\xd8\xb2?\x82;\xae\xd8g\xcd\xe8?\xb8\x12\xd8\xe0\xeb\xa9\'?\x82\xe0\xac\x96}3\xed?\x0f\x9e\x9c\xf9\x9a\xbe\x90\xbf\x01\xed\x12\x03\x0c\xe3\xee?\xd9\x05\xc3m\xf2z\x80\xbf/\xf7\xda\x02\xc3\x93\xeb?\x87\')(\xf7u\xd1\xbf$\xc7E\x88\xb5\xe9\xfa?\xc6\x98\x0e\xa1\xc3\xac\xb1\xbfY\xc1\xa4\xed\xff\x95\xf2?\xb6e\xd7\xb8\x10\x90\xa0\xbf\x9b\xdf\x82.wX\xeb?\tI1\xa4\xf0\xcc\xbf\xbf\x1e\xcf\x19\x1e\xb8\x88\xf3?T<\xebO\xc0ai\xbfd\x17\x9e^\xbc\xcc\xeb?8\xc5C\\\x17\x0b\x81?VrN\xcbi0\xee?\x925<\x1d\xbd\x1d\xbb\xbf\xc8\xd6\xf0Dk\xaf\xf1?\xc8\xe1\xd1=\'\x94\xbd?\x15mZN\xe7\xc8\xe7?\xca\xddk\x8btF\xb2?\xa4}Y\x00a\x18\xea?\xe9\xf5\x94G\x88\xc8\xc3?\x7fG\xa4\x03\x12\xd6\xdc?\x8b\x18p\xf0\xaa\xbe\xb0?\x06\xf6`M`\t\xe9?\xe9\x1d\x04\xcc\x97B\xa2\xbf\x8e\x1d\x93\xe3\xaa\x93\xf2?,\xc4\xd81$\xc5~?\xd7\xca6\r\xbf\xab\xf1?u\xcci\xaac\xd1\x97?\xb6\x8e\xb3%\xeeC\xee?\x12\x91^\xa6\xef\x04\xb5\xbfE\xb4\x92\xd0\xad\xcb\xf1?(\x08\x1fKN\xdc\xa1\xbf\xce\xa6I\x9cS\x99\xf2?(\x89\xae*\x03\x86\x84\xbf\xed\xea\xe8-\xaa\xc5\xef?\xb8f)c\x81!\xca\xbf\xdc\xcc\xc6z\nq\xf7?"\x99\xf5\xf4\xb7\x80\x92\xbf\xb4\xb4jYi\xb6\xea?\xe0j+\x8aU\x95\xc9\xbf|>\x1f\xec0\xbe\xf1?w\xed\x96\xf31x\x91?6\x84*L\x8bX\xed?o\x8da\x98\xe2\x9f\xa7?\xc8\x11\xac\x0c\xa7\xbc\xe6?\x88wJ<ce[\xbf\xf2\xae\xa0\xa9\xe1\xd5\xf0?.X/\x89\xc6\x98\xb3\xbf\xdf\xafCW\x19Z\xea?\xcf"\x16c\xfc^\x99?\xb3\x04\x16\xc4\x9b#\xf0?\x02T\xdaPfs\xa9?\x7f\xa87/w\x1b\xf0?\xf8F\x9ceIOv?X\x1a\x99XG\x89\xe8?n4\xcf*\xc1\x12x\xbfi\xf2\xcfz\x14\'\xea?A\x03\x1a\xab\xee4\xc3?M\xca\xf2\xc7\xe7\x10\xe8?jFu\x9f\xa7\x99\xb2\xbf\xdf\xf9k~\x0b\xf2\xf0?p@:\x9d\x15\xfc\xad\xbf\x14\xd3\xd7\x81\xa2\x1f\xf0?\'\xdfFK\x7fS\xe9\xbfs\x8f\xe2\xd06\x17\n@)\xba\x12\x1e\xda\xf8\xaf?{\xc7jb\x84\xbe\xea?JP\xa8E3f\xb8\xbf\xbd`\x8e!e\xd6\xf4?\x14\x990\xaf\x8b\xb5\xe4\xbf\xc6`\xd1\x9c\xb0J\n@By\xc4\x7f\x7f\xe4\xc8?\x0f$\x16\xf7~i\xdd?qF\r\xbbu\x87\x93\xbf\xef:\xe5Ms\x12\xf2?*\x9b+5\x17\x9e\x9f?m\x84\xf5\n\x15A\xf0?Sk\x8aM\xf0\xf0\xb0\xbf\xb8\x0ca_\xb5\xe0\xf0?\x0b\xd2\xb8B\xc5?\xae?k\xcaw\xcb\xbe:\xec?\xb9\xd8\x8e4\x99\xef\xb1\xbfC\x82Wu\x94\xe9\xed?\xd4Jfn%`\xad?z\xe4\xa9\xc9\xfa\x89\xee?u>\x1a\x8f\xbc\xae\xc1\xbf\xfc^k\xae\x91\x9f\xf3?\x83\xc8\xa6Y\x1dC\x82?b\nf&k\x1f\xef?\xf0\x94\xc5\x8fH\xd9j?\x07X+\xbe\x18\xdf\xed?\xe5\xae\xb1\xd3\xd9\x08\xa9\xbf\xe4\x98\xed\xa7\xa7\x15\xf1?\xbe\x02\xa3.\x10\xdf\x8d\xbf\xa8\xe1\x9c\xa9\xeb\xfd\xef?\xcf\xf7\x0b\xe7\xcc\xfb\xa5?\xba\x7f\xe1\xd7\x9e\xd4\xeb?\x01Vv\xabY$\x8b?\xf3\x88\x15X\xba\x83\xee?\x99\xf4_\xdc\xba\xa7\xa5?E\x9f\x85Z\xff\xe1\xe5?)\xf5\xe6\xe5f#\xa3\xbf\xc3\x80\xbd\xe4\x1di\xf0?6\\m\xd0\xc3R\xaa\xbf\x83\xad$\x7f\xddu\xf0?dY\x99F6\x9a\x82?8\x0e\x0b\x1b\xf8\x89\xee?\x1dB\xb5\xe81U\xa6?\x94\xe6\x9b%\x0c*\xea?\xbe)\xb7W\xabM\xa4?\x8e\xea\x1eC\x86\xdf\xe5?F=\xf0B\x9bp\xc4\xbf\xe6\xe1\xed\xccC8\xf5?`,D\xae\xf0\xbf\xd6\xbf\xcd\xca\xd1\xe8,j\xfb?\xf1\x1d\x10e\xbd\xfc\xa1?\x83\xfe\xecf\xf49\xec?$8\xda\x08j\x10u\xbfg\xe9h\xda\xac5\xee?\xad\x86=S\xeb\xbe\xf0?/BpRi\x01\xc7\xbf\n\x9f\x07\x1f \xb9\xa7\xbfA-Ep\x9bY\xef?A4^\x8f\x0b\xfe\x80\xbfrU\r\x0c\x1e\x1a\xf0?\xb4C\xc1\x00\x03j\xa2\xbf\xcc\x00\x10^\xc7\xe9\xf3?]\xde\x95\x04 Bb?!a\xdf\xffC\xa9\xf1?z\xd5@\xdc]B\x96?\xf1F\x03\x99-\xc6\xed?\xc4X{Cg\xb5\x9a\xbf\x80Rm=\xe0\x97\xf0?\xb2\x852\x0b\xc2\xe6\xb9?\x01\x16\xf3O#\xc2\xe5?\xd6\xfd\xb0\x9d\x11\x0e\xa5\xbf\xc6/\x1e\x8fp\x1d\xf5?^\xfa\r\xbe\xca\xb6p\xbf\xba8/\xc90V\xec?}\xeb\xf6\x0e\xcc\x9a\xb0\xbf\xcd\xc3\xfd\xfaP\x97\xf2?@\xa02\xc7\xe8\xc9\xb9\xbf\x8c\xc6\xf7\xed\xcf\x99\xf0?_\xbb\x08\xee\x97\xb3\x9d\xbf8\xf5\xec\xecy\xb5\xf0?z\xf3`o\xb8\x9cg?\x1a\x13D6X\xca\xed?\\\x1f\xd2\xae K\x7f\xbfP6\xc3F\xbe\x9e\xef?*\x8c\xa3\x8e\x97\xda\xc1\xbf64\x9b\xd9C\x1f\xf3?\x8d^n\xe4\xa0\xcb\xb8?\x84\x8a<\xa2Y"\xe7?\x07\xf2\x85\xd0v\x8d\xa4?*\x0c{U\xb9\x9a\xee?\x82p\x82\xb1\xde+\x9c?v\xe5\xe7\xe5\xefM\xef?LIY\xe1\x88C\xbd\xbfp\xc1\x19&\xf8\xfe\xef?8\xfe\x8b\xce9\x9e\xc1\xbf\xf6\xa5\x17S\nN\xf1?\xc2}\xdb=6l\xd8?\x96j\x058\xf5\xe2\xde?\xb7/Q\xfa\xd2s\xc2?7\xfd\x8e\xc9\x9bL\xe0?\x06\xfaf\xc3\x9e@\xc2\xbf\x10\xd7MS\xc8\x9e\xf4?[\x8a\x01[#\xaa\xb7\xbf\xa0\xf0x\x0b\xd8&\xf2?IX\xd7\xbf\x05y\x8a\xbf\xb9\xf8\xaa\xc5\xad\xba\xf0?,\xc6\x01\xb6\xdd\xa0\xd2?\xb1\xc6I\xd5\xbe\xcd\xe0?\x8e\xf3\xfb\xbf/\xb4\xa6?1\x1675\xc3r\xee?7\xf3\xf6\xdd\xe2\xba\xb5?2\x00E\x10)R\xee?l"\x0cQ2\xc3\xac\xbf\xd6\xa9\x0b\xc8\xc7\x9c\xf1?\xf9\xaeF+\xf7^\xa7\xbf\xf0tQ\x0f\xd2=\xf0?\x87S\xc7\xcdf!\xcb\xbf\xab\xfei6\x91U\xf4?\xc9\x1e\x1eKM\x05\xa1?#\xb9wu\x87\xb6\xec?\xe9t\xbd\x8di\x85s?\xdb\x9d\x9dD\x1cL\xf1?^\xf2n\xab\xafY\x8b?\xa6E#\xea\xf2r\xed?1\xc2\xf7\x9b\x060\xa0?q\xb5\x18\x18/[\xe7?\xf2s!w\x93\xce\xb6\xbf\x0c3\x84-um\xef?\xdf\xf5\xb0\xea{\x9c\xb6?\xa1\xed\xe8\x00\xed:\xe6?\x1d\xa7\x1d\\\xb7\x8b\x8f?A\xbc\xfa\x08Ok\xec?\x9fG\x907\x83\x80\xcf\xbf\xe3\x86\x967s%\xf9?$<\xb9(\x12\xc2\xa1\xbfyx\xd668\xca\xf0?\xa9tP\xaa\x04\x87\xa2\xbf\x95\x8d\xb5\xbe\x8di\xee?F\xad`\xbe\xb8\x87\xbd\xbf\t\xaeS\x92M\x03\xf0?ui/k\xcbZ\xd2?"\xe2\xc3\x10\x104\xde?>_\xa7O\x95n\xb8\xbfe4\x04\xd8k\x17\xee?j\xc0$\x87M\xa0\xa0\xbf\xce\xb6\xbeJ\xbd\xa3\xf0?p\xff\x05\xeao\xbf\x9c\xbf\xe4\x90\x8d\x04\x9c\xd3\xf0?{\xf6<\xeb@\xbb\x94\xbf_F\x9a`\x1e$\xf1?{\xdd\x82u\xc0+\x89\xbf\x15P\xf4I\xa42\xf0?\x7f@;#N\x12\x94\xbf\xd5\x1eH\x9e\x86`\xf1?S\xd6\xed[\xb6\xd1n\xbf\xe8\x87\x83o\xbez\xe8?\xf4\x11\xb2\xa0\xf7\x16\x9f\xbf\xe0\x89\x93\x13\x1f\xec\xf3?\'+!\xfe.\xe0\xb6?y\xfa\xe8\xfelj\xe5?\xa7\x1b\x86^\x84(\xbf\xbf~\xaf\x07\x07\x8b\x06\xf3?\x81\n\xbb\xa5\xa7\xab\x80\xbf\xf1\n-\xc8\xb1\xfb\xeb?\xac0\xcc7aT\xb0\xbfu\xa9S5\x9cW\xf2?\xf6\xce\x05\x8c\x1e\xe3\xc8\xbf\x18(b\xf6\xc9\xf3\xf2? \xfd\x96\xa9\xdf\x1a\xd1\xbf\x94ku!\xa2\xee\xf9?\x06\x83J\xa2\xd6\xdb\xd9\xbfh\xd4\xb4\xbe\x01\x01\x02@\xb9\x86\xc0\xca\xbcK\xbe\xbf0\xa7&\xc1\xef\x90\xf5?\xaaj\xa2\xaa\r~\xac\xbfN\xa5LJ(\xbb\xf0?\xae\x15\xc0\xb8\x86\x1d\xab?\xe1\xaf\xf6\xc4\x90\x16\xf3?<x>-1\xa5\xa7?\xf6\x07\xc3\xa1b\x02\xee?\x0f\xe8\xea\x7f\xfd\xd1\xc4\xbf\xd8`\xb7\x06\xd3\xa1\xf1?o\xfe\x86\x08/\x04\xa0\xbf\xe5\'\xdcP#\xa5\xf0?\x02\xdf*\x84\x02J\x9f\xbf\xacQ{Be\x93\xf1?l\xdc\x10_\xe8\xa4\x90?\xd1\x92\xedQS\xc4\xf1?!\x98[\x8d"T\xc0?+\xebt\xa4\xc0\xb9\xed?\xd4z\x84\xa5Eo\xb2?\x9c\xb5\x15ag\xe1\xe9?\xfa\xfa\xab\xef\x16m\xb2\xbfq}`$\x04\xed\xf5?T&J\xb4\x9dm\xa0\xbf\x18\xe2W\x8b\xdd\x0f\xf3?\x00c\xfeG+\xd2\xb2?8Gf/z\x9a\xed?\x9a\xb25w\x9a\x83\xac\xbf\x04\xf7\xed\x87\xd1S\xef?\\\xa3\xff.\xb0<\x8d?B\xb4?\xcb\xf9H\xec?h)\xf1;Q\t\xc8?\xffy\x1a9\xe1\x8f\xe1?\xee\x8a\x18DdK\xa2?\\\xe4l#\x13\xbe\xec?\xa8\xb6\x02x\x80#\xd0\xbf\x99\xbe\x19\xaavV\xf8?\xac);\xcd`\xd3\x9f\xbf\x03\xa7\xa3\x9d\x13\xc1\xf3?\x03\xc8W0J\x8c\xc7\xbfp\xe8|v\x1eX\xf4?\xe4S\xe5R\x8e\xfa\xaa?U}ZG\xb0\xcc\xec?B\xdb\xac\x80\x8e]\xa3?"GEx\r>\xe4?\xff\x05<\xc8^7\xac?b\xfc\xd8\xb7h-\xef?\x9e\xb5\xfd\xd7\x06P\xdc?XB\xb18:R\xcd?\n\xc4\xa6\xf5e\x94\x82\xbf.U\x80{\x90\x86\xed?=\x0b\x0b\x15\x97\xb4\xa6\xbfY\xa9\x91\x86$\x89\xf1?\t6\xf9\xd2bi\x89?\x9b\x84nf-[\xeb?<by|\tr\x8d?\xf1\xce\xe9\xba7>\xe7?.\xb8\xf6\x83M\xd2\xb2\xbf\xe7LzCk\x82\xf4?\x9au\x11\x01A.l?3)\xd2\xaa\x1f^\xec?D\x00\xeb;\x96\xbd\xbc\xbf\xe2{43\xb1H\xf2?\xabe\x97\xe8\x00\xb5\xa0\xbful\x80\xd8l\x19\xf1?\xdf\xcf(\xb9\xb5\x08\xac\xbf\xf1R\x1d\xf7!\x99\xef?\xe5G\xbd\xbe\xccd\x88\xbf@f\xcdi\r\xbf\xee?M\x07~\xb0\xacZ\xb2\xbfX\xbc\t\xa7\xbbL\xf3?\xaf\xea\x95g\xc4F\x8c\xbf\xc8\x18\xa2\x1e\xb4\xca\xec?\xa8\x89\x952\xf4\x1d\xcc?T\xecv\\Mr\xe7?\xb0\x7f6\x02\x8a\xf0\x85?\x15\xbd\x87\xa0\xe0G\xeb?\xf2\xdb\xf8\xf0\xf2\xb2\xb9?\xd9\xad\xe8\x8d\xfb\x8d\xe7?UX\xf8\t\xf7~\xac\xbf\x90\xbc\xd4\xb0\xe6;\xf0?i)x\xb6\x8e\x9aa\xbfS*\xe4m\xc9\xb4\xeb?:\xb31\x98\xb7\n\xd9?\xc70\x1e\xa4D\xe8\xe0?\xd1r\xc6k\x02\xab\xa9?\xde\x1d\x16H\xe5\xd0\xeb?DE\xdf\xdb\xe5\xa3\xb5\xbf\\;\xd7\x87jX\xf4?h\x12\xdd^\x92)j?\xa7\x10\xfd\xfd\xe0<\xef?\x7f\xb6\x12\x04l\xfe\xa5?y\xf4\xfe\xee\x8e\x12\xed?&\x87 I\xd3.\xa0\xbfJ%\xf9\xd7D\xaa\xf1?\x95\xbe\xa9=\xfb\x1a\x87\xbf\xa6v\x9e\x12&b\xf1?\x98\x13Tz\xb1&\x96\xbf\x9d\xb1e\x9e\xe1\xb9\xf0?n\xb4\x92n\x1e\xc3\xa5\xbf\xf2WvR\xc6\x05\xed?>\xb8\x1ddt\xe6\xe8?\xdd\x88:\x9bs\x15\xd9?5\x1a\x86\x08\xd01\xb4?\xcd\x96\x03\x81\xc1\xda\xee?f5\xfa\xb0\x9e~\xdb?\x08\x90\x17\xd3\xb7*\xd8?_\xb7\xf5\x85$\x86\xac\xbf\xf0\x15Pl\x01\xdc\xf2?\r25\xfcvA\x94\xbf\x1c\x87\x06\xebq\x95\xf2?_NN\xe4\xb1\xfe\xbb?\x98\xffFo\xf9\x95\xec?\xe9\xfdOm\xf2\x16d?\xa0U\x90?8B\xf6?rZ\xbaZ\xef\x01\x83\xbf01?\x0b\xc1\x17\xf2?\xb0G\x02\xa7r-\xc5\xbf\xf0#\xb78\x0fp\xf2?\x14\xc3;\x12\x9b*\xb3?\x9d\xe5\xe5+\x14O\xea?M\x8a\x14e$?\xc0?d\x96\x9dslO\xe9?\xc7\xc2a\xcc\xe8\xc5\xb0?\x00M\xbb\x07\xad\x85\xf4?\xd2\xb1\xc4o\xc5\xf3\xbd\xbf\xb6\xec\x0f\x88\x9d\x0c\xf0?\x801\x9ap\x8f\xf8\xc2?"\x97\xa4\x8d\xc1\x7f\xe3?\xc8yU\xb28r\xc7?\xb4\xaf\xb7\x83\xbaK\xe9?\xd2\xaa\xcf5\xb6\x01\xa9\xbf\x19~-3\xf1\x8b\xec?\x95V\xbe,\xa3\xa1\xa8?\x9d\xc8\xa9\xbf\x1f\x06\xe8?\x7fE\xd0\xab\xb1\x05\xa7\xbf\xa9\xd5\x7f\xdd\xdd\x95\xee?rt\xce\xf5\xde\x05~\xbf<\x80\xae}&E\xed?\x8f\xbaj\xe9(\xfd\xc5?9\x8c\x8b\x01n2\xe7?\xa7\x1a\xc4\xb9\xd1\xc4\xb0\xbf\xbe\xe1\xac/\r6\xf3?\xda\xa9\x88_7hb\xbfa\'\xeb\n~g\xf2?}\xc9\xb6\x04;\xc5d\xbf$z\xa1,u\xa2\xea?\xcd\xaf\xeco\x9d\x83\xcf\xbf\x18\xed^\xfd\xa2\xaf\xf7?k\x0c\x00\xd8\xe5#\x9d\xbf\x81\xaa,?\xe17\xf2?6F\x8f\xb4.hr\xbfI}\x14\xdd\x8cI\xe7?\xbe\\J+?\x07\xa9\xbf\x831fg\xfad\xec?\xdf\x0c\xd6\x132\x7f\xb1\xbf\xdc\xb1\x89\x91\xc7\xb5\xf1?}\x07\x03P`Md\xbf\xd6\xd9\x14l\xb5\xe7\xed?\xf4\x1c\xc7\xcb\xde\x91\xa4\xbfh\xd0\\\x05\x96\xa2\xf0?\xfaK.a13\x91\xbf~\xdd\xe8p\xbfz\xeb?\x18\x81\xa4~\xb0\xea\x89\xbf\x9c\x83\x13\xca\rc\xef?\xaa\x96\xc3\xd1zy\xc5\xbfv\xd8kya\x82\xf2?'
p142
tp143
bag2
(g3
(I0
tp144
g5
tp145
Rp146
(I1
(I2
I319
tp147
g12
I01
S'\x1bb\xc6\x8f\x10Z\xc5\xbf\x97\x98\xf0\xe0q\x85\xf5?K\xce\xcc\xfd(\xda\xc2\xbf\xc1\r\x13\xa4\xb8f\xf1?\xf2i\x82X\xab\xb7\x8f?p\xb3p\xc1\x0b\xce\xea?\x9e\xd3\x8a&X\x88\x97\xbf \xe9ymi[\xf0?v1\x0b\x83\x83N\xa8?p\xc4Tm\xc1\x1a\xf0?\x0b\x0e\tSs+\xa2?\xe7\xacG"uj\xeb?\xa5\xe4\x0f\x19\x84\x7f\xb9\xbf\xec\x07C\x04\x1b\x98\xf3?"-\xf2\xcadU\xb8?f\xa1\xeb\x00\xa0)\xe2?\x92aM\xf3\xcc\xb0\xbe\xbf>\x99%ea)\xfc?.Tq\xbbr)\xb5?\xaas\xf6\xd2t\x19\xe5?{v\x94\x1c\x98\xc2K?\xad*a\xad\xfb\xda\xee?b_\xd1t:3\xb7\xbf|#\xc3(\xb3\x0e\xf2?\xd38\x97T^\x02k\xbf\xd3\x13&\xcc\x1dV\xf3?\xb91$\xfd\xe8\xe7\x83\xbf\xa5\xe3@\xd53w\xf2?\x8ef\xfc\xab\x0f\xe4\xa0\xbfVXQ\xde\xfe\xfb\xf0?\xac*:)\xbc\xe9\xbb\xbfS\xe7S\x8a\xfd\x93\xf6?>\xd6\xc2\xf2\xff\xa0\xb0?\xa5\x17\xe8{\x1e+\xef?\xd3\xe8\x1c\xd0f\x05\xd0\xbffTg7>\xf2\xf6?\xf26\xf0\xf9\xeb\xdc\xb1?\xed\x1ea\xd8\x9b\\\x00@\xfd\x98GM\xf4`\xb7\xbf6G&*3\x82\xf8?\xc7\n\x84\xa2\xacO\xbb?-\x93\xbd\x1e\x1f\xa9\xed?\xf8|\xb5\xb9\xad\xda\xb4?\xcd\x15\x9aR\xbb=\xed?\xc0\x13\xc3\xd33\xb5\xb2?\x04n\xf7#\xbb}\xe8?chRV\x8a\x99\xc5?3[RY[o\xea?\xd1.\x17\xbd\xd2\xcb\xc2?x\x8eKy\x19\x8f\xe3?\n\xe1\x8f\x16\xbd\xa0\xc3\xbf\xecw\xb0\na\xc7\xf0?\x13\xfe\x00\xb3\xe5\xa6\xb4\xbf\x02\xfe\x89\x80\xa4\x98\xf4?\xcaOjv\xaa\xcb\x8d\xbf7wRR\xa8\xfc\xf0?f?^{?y\xc7\xbf{\x13\xbf\x80\x89\xda\xf7?\xa2\xee\x92k\xba-\xa4?,\xfc\x1f\x07\xfc+\xe8?v\x9f\xc9o\x88P\xb9?\xb2KC=S\x14\xeb?\xeeB\xf3?\x06\x1f\xb1\xbf\xfe\xb8\x06Y<Q\xef?\x91\xa5\x9b\xdd\x1dj\xbe\xbf\xf8\xae\xe3d.D\xf3?+D\xc2\xa5o\xe5\xc0\xbf\xf9\x16M\x18\xf3s\xf4?^\xdb\xe0\x9d(\x8f\xd6?j\x93J$\x8em\xf7?\x17\xc3\x12\xd9\xfff\xbe\xbf\xed\x00\x988\xe2\x00\xf4?/\x04\xec\x15\xc0\xbf\xc7\xbf\xf6\xa2m9`\x9c\xf9?R\rm\xd0\x9c]\x8a\xbf\xec\xd9\xcf\xa3]\xf3\xec?\xd7TJ\xe3\xc5<\x99\xbf\x88>\x1d%\xec\xc3\xeb?^\x97\xf6kc\xf1\xb6\xbf\xd1\xc4\xf1\xa7\xcf4\xef?\xbe\xa4O\x9b\xcdY\xbf?\x8a2\x06\xb4\xfd\xda\xe7?\x025}\xa9\x13\x90\x80\xbf\xaf~\xad\x15v\x81\xf0?$\x8f\x03\x95}R\x82\xbf\xf2\xcf\xd4\x19G\xe4\xf0?;\x85T\xefV\x12\x8e\xbf\x89\x1c,V6t\xf0?\x9e!Zo&U\xd2?\xca\x9aS\xb2\x9f\x16\xed?\xfc|\xc8Or\xda\xbc\xbf<7\xb0L\xee\x90\xf4?Nc\x8ee\xe5\xd3\xc4?\n\x02\xcc V\xf2\xdf?\xb9\xf7Tare\xd9?\xf3\x9e05\xbd\xeb\xe1?\x8d*\x8e\x96\x0f\xc0\xce\xbfH:Kw\x8ee\xfb?\xfa\xd5\x86\x8b\x84\x90\x85?~\x9a\xdf\xa3\xc4R\xed?\x05\x85\xb1\x1a\x97\x05\xaa?\xb5*[\x13\xc0\xab\xef?j\xf5\xf3\xafC\x94\xad?E\x07\xd0\xd1\xd1(\xf0?@\xd3=N\xb3\r\xb6\xbfJk\x90`\x10\xe6\xf3?\xa3\xce\x94\xb1\x03\xb4\xc5?Y\xd9\xd6\xf4\xb9\x08\xeb?|XH~\x89S\xc7\xbf\xa6\xf2\xe6\xb9\xd2?\xf4?\xe4\xd1\x9f\xc2\xec\xa4\x99?\x1e1&\xb0i\'\xee?//\x8eXB*\xa2?\x89^\xd8\x07T#\xec?\x03\xff\xfd\xc8\x9fC\xb4\xbf[\x9b\x1aZ\x90\xa3\xef?\xc1_\x03\xca-\x12\xaf?\x18wuP4s\xea?\x93\xe2Hz\x90-\x9e?\xb6;\xcc(}Q\xeb?\xa7\xb1\x0e\xdb\xa1\xce\xb3\xbf\xdd\xd4\xe7\xbc\x9eo\xf2?\xf5\xb9\xd1\xc0J\x83\xcc?\x19\xb9\x9a\xaa\xf5J\xde?\xaeh\x93\x97$*\xa1?\x8cFSu\x7f\xcb\xe7?\xc7\x7f\x91N\x86\xa6\x85\xbfk@N\x0e/\xb4\xf1?\xaes(t\x94K\xcd\xbf\xf2\x17\x92\xdfp\xd6\xfa?\xe6\xed\xb0+\x19w\xa0?0O\xf3\xfa\x0e\xbb\xee?\xf3|T\xb9\x07\xec\xb3?QlKvM\xa1\xf4?^*\xd4\x07\x7f\xe8\xa0?f\x8d\x00\xd6\xe0\x87\xf2?*\xfcq\xe2\x03\xc1\xa9\xbf\xc6fKDK\xb0\xee?\xa2#\xd9v\xc0\xb3\xb5\xbf\x7f\xaf\xe9\xb7Re\xef?\x00\xddG\x8a\xb4\x04\xc7?\xab\xd4\xb9\xe2o\x19\xe7?\xf3\x9dgk\xf1\xf7\xdc\xbf\xa5&(\xa50e\x03@\xc7f\xff\xba\xa2\xa4\x98?,dk7\xeb\xde\xe9?c\xe9\x96\xce=\x18\xcd\xbf\x93\xc4\x06\xf5\x02\xf6\xf8?\x99\x18\xb2\x7fK\x88\xc0\xbf\xe6\xd9k\rek\xf3?\xf4\x0f\xbb\x81n\xf5\xbc\xbf\xf6\xf097i\xdb\xf3?\xf0\xfb\xb5\x8aM\x08\xc1\xbf\xb3\xae\xa2\xef,\xee\xf1?\xc69\xe6-\xcf\xa8\x9f?\xe7\x03\x02\x92\xb0\xf1\xf2?\xb3\xa8$\xear\x14\xf1\xbf\x9b\xaa^\x91\xd2\x90\x10@\x1f_\x03\xe2\xd8o\xb5?\xc04\x85\xe5\x17\x9b\xe8?\xf7\xffx\x8ct\xe2\xc0?\xc5\x03\xa5u\xf9\x08\xed?j\x98WH\x81\xd2\xb7?\xd0Oh\xafS\x9a\xed?>I;\xdd\xc5\xdf\xd1\xbfqO\xfe\x9a\xef\xd9\x01@[\xe4D\xc3y\xd3\x98\xbf\x11$\xc7\xe3.\xc0\xf1?\x9f\xd7w4&9\xbe\xbf\x1f\x9c\xe7\xb1\x9a \xf6??\x1a\xf0\xb2Je\t\xc0\xb6\xd7R\\\xb5\xab&@?l\'\xad\xcd\x03\xa2\xbf\n\xa8\xbc\x8aKQ\xed?\xe5\x00h\xe3\xd6H\xc6\xbfR\x85\x9b]\xaa\xcf\xf8? \\\x98x\x17[\xde\xbf9(\xd6a\xed2\x04@\xfd\xaa\xf4\xf1\xde4\xb6\xbf\xa7J\x18M\x17\x97\xf4?\xd8\xad\t\x87\xe8M\x8d?\x1d\xa3\x07\x17G\xb1\xef?\xea\x96\xde\x0f\x82\n\xbb\xbf\x0e\xf0\xe9\xfd\x1fP\xf4?\x04\xe3\xef\xf0\xcf\x05\xe5?:\xa9\x1a2\x84\x1a\xd7?\x8a\xcd\xbe\x1c\xcf\x9d\xa8?\x93HF#\xfb\xec\xec?\x84T\x10\xe3\'\xfe\xba\xbf\x99\xaf8~\x94z\xf7?\x7f6\xb7\x0f\xa8\x18\xd3?\xaf\x9cc\xe26S\xe8?\xab\xe7m\x00l\x1bw?\xfcKs\xfe\xbeD\xef?\xb4\x80-\x916\x13\xc4\xbf\xfd\x84\xd4\x85\xe6\x84\xf8?\xa1\x01\x92rG\x01\xc1\xbf\x98\xed\x04\x02|\xf0\xf2?\x89\x83WMpe\x97\xbfOg\x88!`9\xf2?.xLg\x90\x0c\xa7?\x91"}&\xa7\xd5\xec?i\xc6\xa2\x89\x0bG\xc7?\xce\x1d\x06 \x10\xa5\xe9?\x85\xbaI\xc8Gf\xaa\xbf\xf7\xb4\x85\xe4\xab\xd2\xf1?U\x96\xb79\xda\xd4\xb2\xbf=E\x1f\xd0\xff\x83\xf3?\x1e\x8a\x1c\xf6,D\xf1?k\x94\x98\xd9\x10\xdd\xa5?\xeb[\xafGs\xb2\x88\xbf\x8d\xc6\xe0\x1d\x94Z\xef?*|\xa5\xfc\xc8\t\x7f?\xe0\xfem(s\xf7\xec?OHA*\xdd\xb5\x99?>\x19.\x05T\x13\xe9?\xa9\x19f\x0f\xdej\x99\xbf\xf7\x1d\xb8\x9e\x81~\xef?WN\xaa\x03\xebt\xa2?\x1fGfW\xbf\xf2\xe8?\xc1d\x111x\xd4b?\xe0\xdeH0\x0c\xcf\xef?\r\xe7\x89M{H\x8e\xbfo\x83vV\xcb\xb3\xec?L\xbe\xd6K\xa2O\xbb?\x88\xf4\x951\x82*\xe9?\x14KL,\xe6~\x9f\xbf\xde\xb4\x89{P\x02\xf1?`\x8f\x0f\xbc=\x9f\xb1\xbfH\xac\xddO\xaa\x8b\xf1?x\xdfh\xeb63\xd6?\xbb\xa9CM\xd0\x14\xdc?|\xf8\xf9\xcb\xb9>\xd1\xbfN\xb3Q?\xac\xb5\xfb?\xee\xd4j\xbez\x07\x97\xbf[\xfe\xb8\x8c=\xaf\xf1?\x16\x9f\xe6\xbe\xe1B\x85\xbf\xb8\xfd\x85\xee\x8e\xca\xee?SW\xcd\x00\xe3\x81\xb4\xbf\xef\x93I<\xf6\xa8\xf2?\xebS\x1ce\x1f\xf1\xb2\xbf\xec)\xce\xdaG+\xf4?Be\x91\xb8\xa1\xfa\xc9\xbf\xef\x9a\x0b\xdb\xa5\x11\xf5?\x14B\xcb=\x0e\x0f\xb2\xbf\x84\xf6\xc5\x15\xe6\\\xf1?T\x0bA&\xb5a\x99?G\x04\x15D\xb2Z\xed?u\x8f\xff9m\xb6\xc2\xbf}\x92q\x9b\xca\x1b\xf6?\x12|\xca\xf2\x8e\x0cu\xbfS&xZU\xf3\xec?\x00-\xfc\xb5\xf0<\xa2?\xb83B\x01{Q\xe8?\x1e\xc5\xcb\xe2(\xf8\xb4\xbfD\xefP\xfa\xf7\n\xf0?\x9bz\xc5x\xb6V\xb9\xbf\xbe\xcbF\xd1^\xe4\xf0?l\xbaw\xc6u$\x97?\xfb\x93}\xfbj\xfc\xea?\x88\xf8\x9f\xb7\xfe\xac\xa1\xbf\x8b\xc3G\x81f\xa0\xf1?\x9dK\x9c@\xc7S\xa7?(\x1b\x18W\xe3\x82\xe6?CQ\xa6jG\x1e\xa2\xbfv\x14#\xe0\xcbb\xf0?\x9a)\xe1\xf9\xfb\xd1\xb2\xbf\xd3\x92W:\x16\xcd\xf0?\xc7\x19z=\xa8$\xbf?\xb4\xfbz\xc5\xaf\x9a\xe0?R\xfd%y%\xb6\x8d\xbf\x86\xe4\x9ab[\xc9\xe7?u\xc4a\xc44\x1d\xa6?\x80\x18\xd9\xf6$\n\xee?5\xa5\x8a4"\x1e\xa8\xbf\xc0\x10R#\xce\xc4\xf4?\xdc\xac\xf9z\x0e\xc5\xb3?\x95\xb9\xaa\xaf\xa2\xaf\xdc?\xe9\xe9\xb3\x18\xa4\xe9\xe0\xbf{\xd7Xi\x9f\xbf\x02@\rv\x90\xac]\x17\xa7?~\xeeE+=P\xe5?\xbe\x89P\xd2\xa5\xa5\xb8\xbfu\xf3\xbc3\xfer\xf2?o&k)f\x1f\xd8?\xa5\x1d\x16iw\x13\xdb?\x05\x8b\x1f\xc4j\n\xf4\xbfF\xe6_\xe8\\\xe1\x12@\xed\x82\xc9\xa2\x92q\xb4?\xe6\x97x\xa3\x0f\x08\xe7?e\x08\xa6\xbc\xbb1t\xbfZ\xd7`)W\xd2\xe4?\x9a\x8e\xe0\xacI\x02\xcb\xbfG\xbd\x9d \xabo\xf4?\xf2!F\xe5\x98\xbf\xb7?\xff\xeavy\x9e\x8e\xee?kF\x1dc\xd4`\xaa?v\xa4\xa4\xa6;\x00\xf1?E<\x8dI\x1b\xe0\xcc?\x8f\xb6\x10vH\xe9\xe3?\xf4\xa4\x7fx\x9f\xd6{\xbfCC1o\x87S\xef? \xad\xfa\x12\xde?\xb5\xbf\xc7\xdc\x92\x06g\x16\xf0?\xe5U1\xcb\x13\xb5\xcf\xbf\xb2^3\xae\x0f\xce\xf8?\xe9\xf1\x1b\x8fL\xc2\xb3\xbf\xb2\x05\xf5JE\xc6\xf1?\xb2\xdfs\xb3\xbaS\xb6\xbf\xe2\xa9\x8a\x07\x93\xcc\xf2?\x93%\x1f\xe1\x07\x11\xb6?\xd5\xa3\x18\xd1\xcc\xbc\xec?\x12N\xa7e#\x0f\x97\xbf\x07V\xdd3\n5\xf0?\x06b_ZH\xa2\xac\xbf\x0e\x14\x80\x0f\xfd\x81\xf6?z\xd7\xcb\xa3\x0bi\xa1\xbf\xf3\xef\xdb\x1b\xfe\xc1\xef?\xbb\x1bx\x9aZ\x92\xcc?\xa6\x1c\xbc\x1d\x81,\xe3?\xc36\xddd\x12\xa4\xcf\xbf\xda\xe9\xc4\x9fWQ\xf7?\x07s\xb0\xe9\xc97\xaf?5H\xbc\x0b\xec\x16\xeb?\xef\x92\x14\x923O\xc0\xbf*\xfc\x852\xa9\xf9\xf1?\xa3\xfe\xa4\xea\xfa\xa0\xa0?Dm\xb3\x93\xf5\xae\xe8?\xca\xd66Zu5\xd2\xbf\x12\x9f4g\x05\x0e\xfc?\x9c\x07\xf5\xbf"&\xa4\xbf\xbe\xd3\xf66|\xea\xf4?\xb1\xc0\xd2\xb7\xc87\xa2?#;x\x94\r\x87\xf1?\xa6\x9b<\x10\x15\xf4\xb8?\xb21\x05\xc5\xeaj\xe7?\xb8\xb4\xee\x12\x0f\xe3\xa8\xbf\xddv;\xb0\xe54\xf2?\xac`\xd9\x82Y\x03\x8b?\xfb\xce\n\xd9+;\xf0?B\xe2\xfc\xb9%u\xba?\x94\xfa/\xff\xb5)\xe9?Z4\x87\x1ck\xa8\xa6\xbf\x81QN\x00j^\xf3?O\x0e\x02y\xab\xe7S?\xb9&\xaf;\xc3/\xf2?=\x99\xa9A\xea\x81\x96?\xa2\x19\x84\x9b(\xf5\xf0?\x9a\x995\xe6\x94j\xd2?5\xe3e\xfe6\x1c\xe3?\xe0\xac\x17\xb2\xd8m\xa9?\xf7\xa3G]\xce_\xe8?\x13\xb7\x07M\xcb\xde\xa5?\x8c\xecn\xfaE\x8d\xef?\x8a\xca\xab\x9aD\x07\xa1\xbfd\xcc\x9a\xb7\xa3\x9f\xef?\x1d\x0c\xb6\xd0,\xc9\xc3\xbf\xa2\xc1@m<\x95\xf5?\xc8\x0b\x8f\x8d\xff\x8b\xc0\xbf\xb9`\xe0\xf2\xa7\xc7\xf7?5\x0fk\xec\xe3\x89\xab\xbf@\xcfE\x02H\xa2\xf6?\xba\x1d!+l\t\x97\xbf5|o\xf0\xcdF\xec?\'\xab3\xfd\xc9t\xd2\xbf\x8d!E^\xe5 \x00@\xb8e\xf5\xad\x91\xcb\x9a?\xa6\xc0\x8df6\xb0\xeb?A\x01L\xf3\xed\xc0\xaa\xbf\xb1\xc0\x0c*\xa5\x90\xf3?\x9c@\x80\xf3F)\xad?X\nS\x1e\x8f\xa6\xee?T \xdb\x0b^c\xc4?\x92\x84\x8fo\xc1\x8b\xe9?(2\xa1\xbf\xd6U\xb3?\x91?\x99\xca\x19\x18\xea?\xde^__\x05\x11\xa3\xbf\xae\xa7\xfa>\xac\x86\xf0?o*\x94\xca8\x08\x9d?y3\xc2\xb1\x03,\xed?\xac>N\x08\xaa\xc2\x94\xbf\xf6\xaf4$\x9f8\xec?\x03:\xbb\x90Btf?\x85I$^ \x0c\xf2?\xcb\rZ\xbf\x19j\xa1\xbf\x87\\\x18\xe7\xb2\xb3\xf0?S\x98\xa4|\x12\xe5\xc6\xbf\x89\xc1\x92N\xaf\xe5\xf6?\xd5D^\x1a{^\xc2\xbf\xd6\xf95\xbc\xaf\x7f\xf3?\x8d\xe9=\xb3\xe3\xb7\xdf? \xbb\xb9JV\x16\xeb?DJ\xfa\xd3\x8ed\xb3\xbf\xce0\xc4\xa3+\x1f\xf4?\xa0\x9a\x96|q<j?\x1d`N=u\xac\xe9?V\xba\xa0\xf4\xe5\xc1\xce?[!\xf0\x9eC\xb9\xe2?\xdd\x01\x9e\x1c\xe2\x90\xb8?u\xae\xa7\t\xe6\x84\xee?\xa0\xb5`\xbc\xfd\x0b\x8a?\xa8\xc7\xae\xcai(\xf1?\xa6!\xac\xd6\xbb\x94\x90\xbfU\x9cf4\xa1f\xeb?\xbd\xa2\xfd\xfc\xad\xb5\x88?\xdc\xafw[\x93\xed\xec?\xe2\x9dd| c\xe1\xbf>\xf1\x03\xb5\xb5\xd6\x02@\x82)c\xfe\xc3W\xc9\xbf\xd2\x0ee`\xcfm\xf7?\x00P\xc6\x08\x8e\xec\xb3\xbf\xa1s\x9d\xe9\xd6X\xf4?\xffn\xd5\x0f\xd5Is?\x03\x0f^\xf9E/\xeb?_Jg(\x90\xf7\xab?\xb5\x07\x07\xd9\x1bf\xe8?\xf7\xf45\xfeX\xfd\xc7\xbf!\xcd\x89\xb9\xa6\x16\xf5?\x87\x81\x16\xefT0\xc7?}\x8c\x0eM\xbd\x7f\xe0?\x95\x84X\xb0\xe3\xb1\x99\xbf\xcc\xeb\x05\xdeZJ\xf1?\xea\x952w\xd8\xe5\xbd\xbf\xf6\xfa\xa2\x15 9\xef?\x9b\xbd\xea\xff\x0c\xfb\xcf\xbf\x8e\xd0\x86\xc8Z\x92\xf4?q!\xe97\x01\xceu?\xe94H\x8a\xbeO\xec?I\x91\xe6\xb9y\xf5~\xbf\xef\xa5\x93\xa0\x18k\xf1?:\x1d\xb6\xde:\xf3\xe0\xbf;\n\xf6\x8as5\x05@\xe6\xbc~\x1d\x99rM?%;\xd4\x1cI\xc6\xf0?\x9a$7\xb6\r\xb6\xb2\xbf\xa2j\xa0`O\xb3\xf1?s\xb3\xc1\x94\xe2\x9a\xbb?\xb1\x9a\xcf&\r\x0f\xe5?\xe9\x137 \x15\xa1\x9d?r\x91\xd2\\\xbd\xfe\xea?\x81\xdd\x02?\xf9\x7f\x81?g\xa0s6\xe8\xa0\xf0?t\x1b\xe4a\xaa\xc6\xbb\xbf9\xbb\t\x19\xfc\x97\xf3?"\x99\xf6SU\x82~?\xc3/G\xd2\xef\xfe\xe8?ox\xdc\xc4\xf4\xab\xb8\xbf<U~cL\x94\xf1?\tmn\xba\r@\xa9?XsD\xe8Y\x8d\xf1?\xe3\x88>\xe6\xa9\x17\xb8\xbf\x13\x12e\x80x\xdf\xf4?Y\xa5\xe3\x12v\x87\xa2\xbf_\xae\x83\xa6\x8d\x85\xf2?\xaf\x17\x88\xdd\xee\x17\xb4?\xe1o\xfb\xc1\x00m\xf0?\x8c\'\xec\xa5"\x9a\xc3?R\xc6\xc7R\xd9\x9e\xf0?\xaa\xf6<G\x18O\x8e?J`-\x9d\x96*\xf0?\xe6\x9c7DQ\xda\xb6?\t\xf04\xcc4\x92\xe9?\xdekL\xb1/F\xac\xbf\x8a\xae$^\nG\xf1? \x8b\x0b\x8e\xf8\xa0\xcb\xbf{-%|n\xc3\xfb?\xec\x13\x01\xe4\x7f\x14\xa0\xbfx\x9c\x9c\xb1\xe0B\xef?H\x85\xcf\xd17>\xad\xbf\x86\xc3\xe0\r\x95^\xf2?p\x05Ef[\xee\xca\xbf\x87F\x1a7\x9e\x80\xf5?\x7fxYe!{\xbe?$\t\xce\x9a\xa8\xc4\xe6?\xc2\xc2\xfcy-\'\xd4?\x8f2nC@\x1a\xc8?w\xa9"An\x87\xcf\xbf{\xdeu\x0f\xdc\xda\x00@\xd2g\xa4\xf5z\x9c\x95\xbf\x98%PT\x88\x96\xf3?y\x084P\x04l\xbb\xbf\xc1\x1e\x96\x88\x1f\xee\xf2?\t\x9a\xabO&\n\xc5?\xa1Kj\xa23\x92\xe9?\xe7u`"\x1cB\xd9?\x1b\xec\xd6I\x08\xb6\xe0?\xbeL\x9a\x8f\xfc\xcc\xa4\xbf"\x17\xb3\xe7[j\xf8?\xf0+\xe31\xe3\x15\xd1\xbfY\xf1\x01\xbd\xf6\xd3\xf9?C\xe8\xdd\xac\x12\xce\xab\xbfg\xd5\x16\x8dUk\xf3?+\x8fK\x99\xa6-\xb3\xbf\xbdr\xb8\xbb\x97\xfe\xf3?\xbc\x1d\x10\xe8z\xc5\xc1?\xeb\xd4J\xc8\x08\xbc\xf3?\xb1\xb3\xff\xad\x98\x98\xb7\xbfC\t\x87\x91\xe9\xe2\xf0?\x8b\xf9+Fa`\x95?\xec\xe4h\xad\xe4D\xf1?d\xdc)\xa4\x89\xed\xb2?D\xa6R[\xe2\xd3\xee?;s\xc6\x12(\xea\x00@\x14\xdd\x17\xd4]\xa1\xef\xbfq\xab\x01a\x1f\xa7\xd0?\x7f}\xf8\x02?\xab\xd5?\xfc\xb0\x9b\x9a\\@\xad?\x9a\xb6\xe6\xb1\xde\xf2\xe5?g\xae00\x19\xc9\xc4?\xa1\x06Y\x16\xe3\xdb\xda?\xbb\xff\xcbSsq\x93?\xbeV\x9dpY\xff\xef?\x16\x96\x1eW\xfe\xaf\x99\xbf"Jm&Go\xf1?\xc5Uh\xf1\x11\x0e\x9f\xbf\x8eY\x17\x10"\x08\xef?0\xbb\x08\xf83P\xab\xbfd\x93\xb5\x0c\xa0\xc5\xee?vM9Rwx\xc3\xbfP\xfa\\\x8d\x1e\xe3\xf8?\xc5R\x0cp\xa4\x1e\xa3\xbfZRl\x04\x8b\x8c\xf0?|q\x8c03\xba\xae?H\xa8\x95\x99\xe5\xc6\xe9?o\xbc\xb7T\x84J\xc1?\xfcGF*\x84\xe1\xe6?\xe0C\x1a7\xdc\x13\xd7?\xb0\xc4\xd6TT\x98\xe3?\xea\xd8\x9a)\xfeA\x81\xbf\x96\xa8K\x03\x84\xde\xef?\xec\xe5\x80\x1c\x1a\x0f\xc4\xbf\x95\xe2\xb9\xa3\xf5\x9a\xf7?T\xd9\xbd\x98!\xb9\xcc\xbf\x9a\xa1\x06\xb2\xcd\x85\xf8?\xb4\xbe\xf2\xcc\xe7t\xc9\xbf/P\xaf\xd0\xc6\xed\xf5?\'\xdf\x9e\xaf\xbf{\xc5?\t!8\xd4qi\xe8?\xf6\xa6\xad)\xb4"\xc4?\xd4^"g\rO\xe6?\x94)E\\My\xb0\xbf\xd6~\x84V2\xe7\xf5?\xbd\xc8F-F\xcf\xb1?\x856f\x96[V\xe3?\xa1\x1b\x85\x1e\xcdM\xb6?\xa9\xf72?\xfef\xe9?\xd0\x16\xd5\xec\xb6|\x9e\xbf\x1d~"\x95\n`\xec?\x81\x1d\xc6\x87Sl\xb7\xbf\x9e"\xeb=\xda\xb3\xf5?rTvKR\'\xa2\xbf\xa0>0\xde\xd5\xe1\xf1?6,$\xc6\xe9\xe8\xa5\xbf\xa5\xfdAFK\xad\xed?P\xb30\x04@n\xcd?\xa0\xf2k\xe1~o\xea?A\xf5\xbf\r\xd8\xb5\x8c?\x94\x92\xf7,1\xef\xee?\x9esE\x07\x00\xc8\xbc?\xd4\x0f\xf5s\x0b\xde\xe5?\x84\xe2\x1a!\x02\xcd\x81?xbss\x1f\xd8\xee?i\xe7\x9b>\xe7\xa4\xaa\xbf\xed\x8d\xd2\x8a\x08\xf1\xf1?v\xc9\xef\xf21\x0b\xa7\xbfs\x9dh\xba\xb4\x8f\xf1?<\xb7zC\x0e\xd5\xb9\xbf\xed\xe9q\xb6\x8e\x03\xf1?\xffQ\xb3#\x0fha?\x86\x81+\xf0 \xc9\xee?\x80\xa4S\x86\x05\xcf\x93\xbf#\x03\xf8\x06\xb6}\xed?\xda\x1f7(~\xef\xaa\xbf\xcd\xd9\xab\x80k"\xed?\xf8\xe1%\xb7\xf4C\xc1\xbft/\xee\xc6\x9f\xd7\xf3?\x17n\xc1\xad\xf6\xee\xc3?\x8b\xa4o\xdfX\x1d\xe4?\xb3e\xbbC\xd5J\xa9?eH\x1cQ\x05\x06\xe8?\x08\xbb\xe0\x1b\x85]\xa8?\x84&(\xb3,q\xf3?\xcd\xbc\x84|4wu?q\x91\x99\x1a+l\xef?\t\r\xfc\x1f\r\x8d\xb0\xbf<f\x1e\x93\xe6=\xf4?!E+O\x9c\xfa\xc1\xbf\x81\x87\xc4\x03\x07K\xf7?#\xf7e\xe0\xca!\xc7?[\xeeea\xb6\xfb\xe6?\xeb\xf3Y\x1a\x96O\xa7?\xb9\xb36LD\x1f\xf1?e\xa7 -a\x92\xac\xbf$m+\xc2\xe5\xdc\xf1?\xca`\\\x8b\xc8,\xa0?\x94O\x8b\x17\xa1\xdb\xed?\xa3\xd4\xec^Hz\xa0?\xaf\xaa\x1aP\x11 \xec?\xb7\xdb\xd8\xf3E\x0b\xe5?\x085\xdd\xbb\xff\xaf\xce?I\xbb\xadT\x9c\xb6Y\xbf?\xef\xd1\x8c\xf7+\xf1?NYC\r\x1dy\xa9\xbf:\x8a,PC0\xf1?\xb7\xa8\x1b\x0b\xa7\xc3\xb6\xbf\x89\xf9\xa0\x0e#\xa7\xf0?\xc5A2\xe9`|\x99\xbf\xdd`\xc8\xd7,\x1b\xef?\x1e\xc7\xd7!c\xbc\xb8\xbf\xb0\xe8SE6~\xed? \x04\x95\xfd\xa4\xd4\xcb\xbf\xa8\x89\x19\xd2\xedq\xf7?9]\xcdI{\x11\x94?\xf0G\xecq\x90|\xea?\xff\td\x8a>\xe5\xb3\xbf\xf0\xfb\xb1xth\xf3?~\x0f\x01\xfa\xce\x15\xc7?\xf75\xb6[\xf21\xe5?\n\xb3\xe5S\xe6\x94Q\xbf\xa7L\x7f\x97\xb6\x1d\xef??G\xf0:\x98\xba\xc6?\x9c\xb2/\xc0\xf1%\xe1?h.\xeb$\x04\xb7\xb0\xbf\x0b\xa5\x88\xb1\x03\x0e\xf3?\xd0\x85W/\x98\x88\xb2?\xcbj\xea\xba\xb5\xc2\xea?/\xec,\xa2\xfd\xe8\xdf?."\xa9\xc7\xe6\xa3\xd9?\xf1\x9e\xd4\x97\xfd\x16\xa9\xbfu\x9c\xc6\x83\x8d\xe6\xf0?\x90mpD\x04b\xa3?\x19,\x843n\xbc\xe9?W\xb0\xdc\xea\xa9\xff\xc3\xbf|02\x90^c\xf3?+2Oy\xe4=\x97?\xe0\x8c2W\x931\xed?\xe8\xcf\x89\xc9\x9fq\xc1\xbf\xaf\xb6\x04] ~\xfd?'
p148
tp149
bag2
(g3
(I0
tp150
g5
tp151
Rp152
(I1
(I2
I357
tp153
g12
I01
S'\x95\xd9?\x7f\x0b7\xb0\xbf\xfe\x9e*q+\x87\xf3?\xa4>\\\x0c\xde\n\xa3\xbf9 \xf24\xfeb\xf0?\xfeO\xe0\xb8\xfc"\x93?8A\x1f\xfe\xe3\xd4\xe9?\x9d.\x0f\x86R8\x95?\x96\xbc\x94\x8c\xc6\xce\xef?\x0f^\x17\x1b\xb2\x94\x91\xbf\xb9\x97\x94\xe7\r\xc6\xf0?\x06B\xb6!\n\xf2\xa8\xbf\xa9G\xf9\n*)\xf3?\xc5\xc3\xf8\xe1\xc7\xde\xb1?7\x85\x9c\xed#\xd0\xf2?tb>\x1ad\x1a\xa1?\x9d\xcf1-\x16\xc3\xef?\xb5f\xc8\xe3*\x08\x99\xbf^\x83\xac*\x17\xa1\xec?\x87\xc3\x7f\x80\xa2\x9d\x9a?\xfci\xe8/\xa0b\xf0?\xcf\xe5\xc3\xb8w\x16\xb3?a\xa8\xaer4)\xea?q\x81\n\x88\x06\x97}\xbf\xc8\x1a\x14\xe5/\x16\xf4?\x10pH\xd55\x17\xac\xbf\xe7\xaaf\r!\x02\xef?\x15\x9bd.\xfe\xfd\xaf\xbf\x0f\xb0\xd58\x93\xce\xed?\xe5\xcc*\x1c\x9c8\xb4\xbf\xdf\xdaL\xb2\nT\xf0?Fd0\xf76\x07\x98\xbf\x81\xb9U\x99?X\xf1? \xe1Ox\x17W\x83\xbfkY\x8c\x03\xd0\\\xea?l\xef\xd9\x95<\xd0\x9e\xbfr1o\xa3\xa6\x00\xf1?q\xcb\x10\xfdlu\xa3\xbf\xbb\x9e\xf6\xaa\x87(\xf1?\x80\xb18+p\xe7\x98\xbf\xa1\x90\xac\xfe\xeb\x96\xf2?\xd1\xe9oB+\xc5\xb0?\xb99\x14e\xc0\xaf\xf1?\x8ca]\x93%0\xa2\xbf\xbdq\x82\xa1\xb8\x85\xf4?Z\x191\xa8\xea\xc3\xa2?B\xca|AU\xbf\xee?\xdbR\xe8\nvv\xab?\x18<^\xdeO\x81\xe9?4\x1cx\xa6\x8e\xee\xb2\xbf\xd5\xad\x7f\xb4\xf7\x1c\xf0?\xd30\x06?\xdd\x1d\xc4\xbf\x06\x90\x14h/\xb6\xf5?w\x9b\xf5\xd5\xddy\x97\xbf\\\\\x0f\xef\xb5I\xf2?7 \xb7\xb4\x03\xbc\xdc\xbf\x81u\xea,\xb9\x1e\x00@\xf1\xf8\x8f\x86j\x00r?wM\x1cJT<\xe8?\x82\xec\x13\xa5]\xeb\xc6?\xedd\x18u?x\xe1?\xb4\xce{\x9c\xfeU\x9c?b2\x94\xab\x89\xef\xeb?:\x83ni\x9f\xee\xab\xbf?\xe4(\xdf\xfd^\xf0?\xb8\xd2lY\x9f\xcc\xbb?k7\xc1\x92\x00\xb9\xe9?}\xd0\xe1\xac%B\xb2?\x80\xe1|\xeb:\x0c\xe9?\x8f@d\x97O\x8c\xb0?\xd4\xe3V\xf9\xf2\xef\xe4?bu\x8cd}\x89\x99\xbf\x06E\x19\xaf\xc9F\xf2?U\x06<\xb5\x04\xbb\xd4?\x12\xcb{\xa2R\xfa\xe8?w\xb5Q\x80\xbc\xe1W?.lp\xdd\xae\xd6\xed?xM7\xb4\xac\xf4\xc3?\xed\xdc\xf1\x90\xb4-\xd6?\x18\xb3\xbaB\xe0\x95p?\x9f\xb8\xf7\xbex\x16\xed?\xb1\x92\x8d\x11\xc0\xc9\xa1?u\x97!-X\x90\xf2?** \x1f\xb8\x91\xb4\xbf?\x94F\xb0\xb7\x1e\xed?S\x97q\xfd\xde\x1b\xad\xbf\x19e\xb2\xaen/\xf2?\x19&\xd1\xe9\xa4\xc8p\xbf,\xb4\xecJ\x86t\xef?\x17\xf3@\t}\xf7\x80\xbf\xc9\xd4j79.\xef?E\xfe\x96\xa5\xfa\xa9\xa7?\xf1Ec\'03\xf0?\x90\x9a\x9a\x9c\xf9\xb7\xcc\xbf\xe3?\xce\x0b.\xae\xf6?\xa2hC\xd4\xcd\xf3\xe3\xbf|zZ\xde\xf4/\x06@\x87\x14[t\xcb5\xbc\xbf,\xde\xdb\xdd\xbd\x19\xf3?\xa5\xdf\xa0iI\xb5\xc9\xbf\x0c\x08\x15\xd4\xf1\x05\xfa?\xca\x89X\xa0\xb3Q\xbf\xbf\x87\xaa\xc0\x96\x9c\xe0\xf3?\xdb|\x8f\xec\x02\xf2\xca\xbf8\r\x95\x9el\xd3\xf9?\xd4\x9f\xe5\x15\xde\x94\xae?\x80\x90\xef\xdb\x8b\xf2\xe6?\x13\xc8\x03\xb52U\xbd\xbf(\x0f\xa0\xc7\xd5O\xef?\xcd\xfax&b\xf5\xb9\xbf\xb9\x8d\xea\xa8\xdb\x9b\xf1?\xe9\x95T\xd6\x13,\x93?\xe6\xde\x11\x85\x8f+\xeb?\xd7\x7f\xdb\xccv5i\xbf\x15Fh\xd0X\xc1\xec?\xf7\x97\xb7\x9d1\x82\x92?0K\x8a\t\xbax\xe8?FuF$h\xc3\xb1?E\x97\xf3\x1cW\x15\xeb?\x96\x07\xf8\x83\x9d8\xc7\xbf\xc2\xcd\xc2\xc5\xf5\x98\xf1?m\xe1\xeb\xb2p\xb8\xb2?\xe3\xbb\xaa\x1a\t\x15\xe5?\x8d\xab\xb6\x19\xab\x08\xaf\xbf\xc1\x1c9h!\xd3\xf2?yZ\xec*\xcf\x15\xb2?\xfd\xd9\x97\x8b\xa7\xd5\xe5?b\x9eL*\xfd\x02\x94?\xeew\xc4\x11t\x06\xf4?\x82[\xb5U\x92\xc0\x8e?G\xb8D\xb8\x03\xe1\xe4?\xce]YA\x83q\x8b?\xd1O\x0e/\x8fM\xed?sr\x0cn\x0b\xa1\xc7\xbfX\x051\n\x8d\x9d\xf6?=JN\x0c\x91\x80\xb5\xbf\x97-]ou\xc5\xf2?~\'\xbc9\x9c\xeb\x90\xbfT\x01K\xb4C$\xef?\xf8\xeb\x9c\xfa\x8f\x05\xb0\xbf\x9d\xfc\t\xbe\xac.\xf1?\xbc;\xb3`\xdbU\xa6\xbf\xe9Er\xfa\x9d\x05\xf1?70+\xe7\xb4\x96\xb0\xbf\x9b\x99\x13r\xd2\x1d\xee?v\xd9\xe4\xaf\xd0@\xc4?\xe4\xcea\x82\xb1X\xb6?\xf8Qq\x9a\xa7\x8f\xb9\xbf\x0b\x9a}\x9fv\x88\xf3?N\xd3\x7f\xa9\x89V\xb0?\xd6\xf7_\x98X/\xf2?\xff\xb3\xdd@y\xf7\x9c\xbf\xb9\xf6W-\xeb\xac\xf1?\xe1\x00\xd6\x8c\xa2\xf3\x9b\xbf\xbc\x1dE-/\r\xeb?\xb5\xf1M\xfa\x96=\xca\xbfkt@#\xdcO\xf5?\xa9~\x98a\xda\xe3\xad?5\x80\xe8\x99\xca\xef\xea?y\xa7v.\xf6*\xa0?\xa6W:\xefpO\xf2?\x90AZ\xd4\xb6\xcc\xc7\xbf\xe7\xccm\x81\xe4\xb0\xf4?\\\xea-WT\xfb\xc2\xbf\xdbu\x11-\xbb\xd7\xec?<q\x981\x9aQ\xa9\xbf\x0e\xaf\xb9\xf8\x10-\xf1?\x0f\x8a\x7f\xcci7\xb2?\xd8b8a\xa8R\xe4?{\xfc\xa7\x191T\xd3?\xa4\xc6\x0b\xab\xea|\xe5?\x86\xfe/\xd1\xf1\xa0\xb9\xbf\xa4\x8ag\xbc\x81\x00\xef?B2\x00\x8a\xe6\x8f\xa3?\xec[\xf7oU\xb4\xf0?\xbe\xb3\x9a2\xf0\xc2\xa7?v\xa5\x9d\x11\x83\xa5\xe9?\x13\x11\x10\xb1e\x94\xd6\xbf\t.\xad=XZ\xfc?\x97\x00\x96vX\x1a\xb6\xbf\xbc>\xec|\x9e\x94\xf5?\xff\xa9=\xa3\x1bn\xb3\xbf\x0c\x15\xe4\xe9\x0b\x1a\xf7?\xfa0\xd4\xe7\xdf\xca\xcd?\x1e\x01zd`\xc9\xd1?\xc7o\x98h\xb2FM?E-\xaa\xf7\xc5/\xf0?\xb4\n\xaf\xfa{\xe5\xac\xbf\x8b\x1c\xac\xa5\xdb\xda\xf1?\x82\xf3]\x983?x?\xfd{\xe9\xea&\x8c\xf1?\x04\xb6a%:\xb4\x94?6\x94\x9eC\x89o\xf0?\x85\xf8?\xf1\t#\xad\xbf\x90H\x08acu\xee?\xb0u\x99gA\xde\x94\xbf|\x89\xdc\x95\xc8b\xf1?k\x08\xa0`\xbc\xe7e?!\x95px%\x0c\xef?x\xb9\x1f\x0e0\xf6\xa9?\xc9\xcc\xd8\xbb\xcfr\xeb?\xda\xbdv\xf3\x91\xbc\xd1\xbf\xaf6\xd4\xdd\xd1w\xfc?\xcd\xa1T\xcb\x01,\x9e\xbf+9^\x10\x0f\xd7\xf0?\xd9v\xb4\xaeK\xfd\xaf\xbf\xb0\xaaw\x7f\xb0\x88\xf0?\xbe%\xf2\xd9\x07\xf5\xb5?\x02\x8f\x1e\x1f\x0b\xc1\xe6?U\x7f1\xde\\Q\xb2\xbf\xff\x9e#VFL\xf2?\xb7\xcfT\xe8A\x15\xc7?8\x06,\xfa$\\\xf0?T\xa5\x9d7\x9d\x1d\xa7?\x91\x0e\xe7\xd9E\x9e\xe5?\t\x8b\xb6\xf9\xc9\xa0\xa3\xbf\x9b\xc4\xe7eh\xd1\xec?\xf3Wj\x16\xa9\x17\xb2?\xabM\x08X\xd6\xe3\xe7?\xb4:]\x8f\xf4\x9c\xa2\xbf\xe9UR\xfa\xd6\x13\xf1?!\r\x19\xa5\x0b\xe9\xc0\xbf\xce\xce4v\x86\xee\xf4?kF:X\xad_\xcb\xbf\xd1\xb2E\xae(\xa8\xfb?\xe9\xd5\xc3\xcf\xa2\xed\xc4?\x10\x00\xf6\xc4\xaa\xea\xe6?7>R\xa7\x83*e?\xce\x15\xd8\xe1 \xaa\xeb?pL\xa2\xb7a\xf4\xa9\xbfdBot\x8ai\xf2?E\x08\xccZ\xf0O\xa1?\x8ef\x13\xb9\x06\xbe\xec?\x13\xdd\xdc\x8d\xa9o\x9d?\xefA\xad3\xa2\xe0\xef?o\xc5\xf8\\\x85\xf9\xb3?\xe3\xd7)~\xe6\xa2\xf3?\xac/\xe2~\xa7%f\xbf\xa1\x0c\xe0\xa4\xd9U\xf0?r\xa7\xbe@L3\xab\xbf\x96W\xc5K3n\xf1?\xbeP\xe3\xb2\x92~\xb7\xbf\x03\x9e\xf5C{q\xf9?#W\x19\x10P\xfb\xb3\xbf\xee|\xbc\xf6B\xb8\xf0?\xc9{H\xa5\x9e\'j\xbf\xd9\xc7\x0f \xf4\xc6\xec?$\xa4\xde\x89\x8b1\xa4?k\xf5\xb4\xa9\xa3\xc0\xea?\xb4^\xc1\xf8\x03\xae\xd3?\xf8\\\x90`\x9fL\xd1?\x1c\x03k1\x85\xe6\x94\xbf\x04\xff\\\xce"E\xf1?\xff\x86YF\xc8r\xbf\xbf\rD4\xf2h\x81\xf2?\x19\xa2\xaa\xdd\x8b\x0f\xa1?v H\xcfK\x0b\xeb?m*\\\xe1b%\xba\xbf+Y\xc9\xb1BY\xf3?\xa5\x81\x8d\x1d\x94cM?\xd2\xf1TA0o\xef?\xed\xd0\x04F\x8f\xb1\x84\xbfi\xc2\xf8\x1c\xc4\x03\xf0?\x00\x9bJ\xbc\x01\xf3\xb4\xbf\xe7b\xbe\x88\xb8\xed\xf1?\xc4\x81X-\xff\xd3u?\xac\x88W\xdc\x88\xf7\xf8?<\x8c\xbd~\x01\xce\x9e\xbf\x98\xa4\x8a\xb4\xad\xa9\xef?\x9e\xa3\xdc\xbd_\xfe\xc1\xbf8\x96\x07\xc8\x81u\xf3?\r\xaf;\x19\xd0\xea\xa3\xbf\xcb\x7f.\x8a%\xa4\xf2?\xdc(\xbfe\x10\xe8\x8a\xbf\xec\xca\x08s\xac8\xea?x\xed\xca\xdaao\xa2\xbf)\x19\t&\xceX\x01@\x011?}<\xea\x97\xbf\xfb\x82(\xa5\xa3\xcc\xed?\x1f\x88\xa0\xe8\x86\xec\xa8\xbfK\x1f\xc3aG\xfa\xee?\xa5\xcc\x893[\x15\xcb\xbfW\xd5\x9b\xee:\xa2\xf0?\x83\xf1\x06h#\xbb\xac?\xc6\xb1\xc8>7\x80\xea?!aasJ\xc2\x8b\xbf:?9\x01b\x18\xf0?&\x17\xd9W\xe4\xbe\xc6\xbf\x8d\xdb\xd4G\x90\xf5\xf3?D=\'_\x1e\xcb\x9b?2\xbe\xf6w\x0bL\xed?\x8e\xf2S\x84\xf6\n\xb3\xbfik\x05?\xde\xc8\xf0?}\xd5\x0c\x81\xa3\xab\xa4?\x9d\xea\x1f\x15V\xdc\xe9?M@;\x93x\x18\x83\xbfr\x8aH/\x19\x10\xf1?v\xb1\xe6\xefV\x03\xad\xbf2\xabo\x13\x84\x94\xf2?\x84\x87\x13n\xab\xff]\xbf\xcf\x0e\x1f\xc9\xa8\x87\xf0?\xb1}\x06C\x7f\xf0\xb5\xbf\xb8tu\x01`\x17\xf1?\x1f\xaeF\x19\xe3\x13\xc8\xbf\xe0%\x8d`1&\xf1?\x99O_\x83\x1f\xd0\xc4\xbf2\xe7\x1d\xe2\xcf\xf6\xf6?\xd8\xd6p\xd5L\x91\x8f\xbf9\'B\n{\xee\xec?>=\x9c\xe6\xc9\x18\x91\xbfR\x87\x07m_\x12\xf5?VO\xde\xf1\xb9T\xd5\xbf\xf4N\xd6g\xda\xc5\x00@\xf4\x86\xe1\xe3E\xa7\xaf\xbf\xba6k\x88\xbe\xa4\xf1?\x9dW\x8et\xdd7\xc6\xbf%-\x7f\xfe\xbf|\xf4?c\xde\x8b\x9ckG\xd4\xbf\xf7\xc1\xe1\xf5\xf7\x1b\xfe?\xa9\x0c*\x8a\\I\xb0\xbf\xf9n\xd3\x86\xc8\xe9\xef?(=8\xeb\xc7\xe0\xaf?\xc23C\xea\xe6h\xe4?[\x97\xd3\xca\xd2\'\xd2\xbf\xea]BZ@\xad\x00@\xae\xbc(m\x07\xdct?\xfa\x95\x81\x8e\x90\xb6\xf7?\xd1\xab\x1e\xa8.Q\xc2\xbf\x1b\x90\x14\xabh>\xf4?\x0f\xf9\x17\xc9\x8di\x9d?5\xa1/\xb0%x\xed?uf\xf4LZ>\xc8?H\x15F\xcbo\xef\xf1?\xb2\\9\xe6\x98\xf9\xb3?A\xbb\x0b\x80\x86)\xea?J\x8b\x06\xf1F6\xc2?\xfaT\x8dl\xff\x9f\xe5?_\xa7\x9fB\xc8#\xbc?\x83.x\xc7\xbd}\xe7?M\xc4\xedZ$\xa6\xac?Z\x8bv\xa5\xff\xf9\xee?J}\xe8~\xa6\xd7\x9d\xbf\x8591\xe7{\xb6\xf1?"\xf5\xc5\x83\xb47\xa0\xbf\x96\x15\xc5\xe0\xa2\x8c\xef?n\xd8d\xef\x07\xb9\xa1?\xfb5\x99\xf7\xdbX\xf2?\xec@\x19l\xf4\xbe\xa4\xbf\xbf`\xd0\xfbCY\xf3?\x18\xf3\xdb\x88i\xe5\xbb\xbf3\xe3\xd6\x9f\xc5k\xf3?\xb1A\xffE<!o?\xe8\xcbn\x1c\x97\xe0\xee?9\x97\xb5a\xff\xb2\x92?WO\x08\xd5\x1d\r\xed?=\xc9\x82\x93k0\xaf\xbf+67\xb7\xdd\x9e\xee?\x1b\xe6D\xb2\xa9\x9b\x9a\xbf\x928\xf90\xd1\xbf\xef?A4H\x96y\xae\x9a\xbf\xddo\xcc\x8eO\x9c\xf0?\x92/"3AW\xba?\xff\xb2\xe5\x99\x91\xde\xd9?x\x16\xb37~\x99\xca?\x1d+w\xab\x1a\x1b\xe1?\xfe\r\n\xca\xc0\xae\xc4?g\xddL\xbfo\x93\xea?\x97\x02\x07\xcb?\xa4\xe3?r\xaa\x0b2\x94\xc2\xcb?\x9bZX\x87\xe5K\xe2\xbf7\t*2\xee\xaf\x03@\xf0N$\xce?C\xc8\xbf\xcb\xf1\xdc\x920\xed\xf9?\xb89I3+\xb3\xc4?\xac\xdb\x8cA\x1av\xe3?J\xdf\xf1(\xacY\xa4\xbf\xc1\xcb\xd7\xab0!\xec?\xf9\xf9\xa2\xa5\xd4i\x9d\xbf\xb1\xbd{7o\r\xe3?}2%\xde\r\xf8\x96?mb\xd7\xb2\x03;\xef?\x9fy6\xecc\xed\xbc\xbf2\xd1\xfc\x8e\xb3^\xf1?\xab\xfan\x9e\x98\x96\xec\xbf\xfa\xed\xd4\x11\xc3\xa0\x11@\x14\xf3mR_\xe7\x9c\xbf\xe56\x1c"\x7fW\xef?\xac4\xf91\xe8\x14\xbc\xbf\xdd\x1f\rX\x07\xd1\xf7?\x8e\xe0\x93u\x7f|\xc2\xbf@\xf5\xe77\x8bu\xfa?\x86\xf9\xf6@\xbc\xd2\xa2\xbf\x1f\xfb\xc4x\xb0\xfc\xf1?\x07\x8e\xdf\x15O7\xa9\xbf\xcb\rc\xf3a\xd2\xf0?<4\xe3\xc6\xd3Q\xa5\xbfA\xa06\x08\x8a{\xf1?\xfc\xbc\xf4\xcf\xf8 \xc0\xbf\xc3~,\xa9#:\xf2?\xdeR>\xf4mq\xba\xbf$)m\xbaAs\xf3?7++Z\xb3\x9c\xce\xbfQzW\xd1\x02\xd0\xf6?\xeb\x08\xba3yG\x9d?\xea<\x89\xc3\xdb\xed\xe9?m?\xd9U\xa5t\x9a?;\xa9\xfd\x04\x90\xf2\xf0?\xdf\t\xee\xeaD\x10\xbb\xbf\x07XZ\x9ad=\xf4?\x9e\xa5\xea\x04\x17\x0b\xcf\xbf\xf4x\xd3\xf86/\xf9?|`h\xb1\xe0n\xa9?\xe8\xb2:EC\xfa\xea?y\xfd\xe0?\x89`\xcd\xbfWw\xdd\xbe\xe9\xbc\xfa?\xd04<\x86W\x05\xaf\xbf;\'x\x15\x17\xfb\xf1?U+\x9b\x80\x99\xf7\xa3?\xd5\x15-Yp\x0b\xe4?\x90\x82\x85?PB\xb2?_\xec\xa5\xe7\xc5\xe3\xee?\x82.]\xb8.\r\xa4?K\xa6\xdd\x07`\xfd\xec?o\xcb]{\x93+\xc0\xbf\xc9 \xfa\xae}\x7f\xf9?1y\x02\xe4\x1b*\xb2\xbf4_z\xe3+i\xf1?\x0e\xf6%D\x93\x8b\xdd\xbf\xe4\x11\xc9\x04\xa2\xa2\x03@\x8a|F\x87\x19\xb4\xcb\xbfB\xbd\x8e\xd7b\xa0\xf7?\xa2\xd7_\xcd\tO\x96\xbf\x19\x03[\xa5\xff\xc0\xf0?\nX\x08^\xfc\x7f\xac\xbf\x8c\nXr\x0c\xf5\xee?\xd9\xfc\x97\xbct\xd9x\xbfK\x90\xf5\x9a`\x19\xec?\r\x8erp\xf6_\xa8?Q\x83\x7f6\xe0;\xe9?}r\xfdu\xc4\xaa\x9f?\x06K\xdd\x1e\xf2\x0e\xf0?\xa7\xa6\x90\x10\x80T\x90\xbfy\xadq\xd8\x1f|\xee?\xcf\xf3\xc6\\\x04\x03\xb4?>$D\xaa\x13\x9e\xee?\xb6\x15\xf3\xc7\x94\xff\x87?\xbe1\x01s\x85s\xee?\x01\x15c\xbfzK\xde\xbf\x86\xb3\x9f\xa9\xd5:\x03@\xb9\xc3\xac\xf3\xc5Aa?\x88R\x8a\xf1\x98i\xf0?\xf4R\xc4\xe7sd\xc1\xbf\xda&i\x95\xaed\xf4?\xc9\xe3\xa3@\x81\xd7\xa2?\xa28\xda}\xcfH\xec?\xed\xe9\xc2^8\xac\xc9\xbf\x7f8\xcf\x9fj\x8b\xf7?\xe7g\x1e\xcf\xbep\x9e?\x85\xe9\xcb\xe5a6\xea?6\x1a\xec\xfb\xa2Fz?7d\x84\t\x08\x81\xe9?\x15\xef\x8e\x92\xbd\x97\xe3?#LyL\x0b\xa7\xb4?\xefO\x99\x82Z\xb1\xaa?\xb5\xbb\xa0O\x80\xd0\xee?\xffH\x17\x8a\xa9\x15\xb8\xbfXQ\x85\xa4\xbb\xb0\xf0?\xa5/0\xbfe\xfcY?\xb5\xa02\x12\xf6~\xf0?\xef\x1d\x81@\x1f\x00\xa6?\x88\xc8\x9a^U\xb2\xe5?gt\xee\x96x\xd0p\xbf\xa2{\xd7\xd0\x82\xed\xef?y\xb6\xef\xba\x91\x18\xbd?\x1a\xb9\xb11\x81\xde\xdf?\xdb\x95\xf9\xa0;8\xcd\xbf\xc9\x1c\xcc\x86\x06S\xf5?7&;\x9c_\x81\xca\xbfi2\xf8\xe0h\x90\xfa?s9j\xf5\xf4D\x97?Z}2\xd5\x93\xc1\xf6?&\x8c\xd6`\xc7\x8b\xc6?*.g5\xcc\x05\xf6?\xe8X\xf6v\x9a\xbc\xd3?Q9\xdc\xd5\x94\x0b\xf0?\xc3ur\xb6\xd4\xc3\xd0?j\x98\x9a\x9d\xd2\n\xf2?\xc4\x8b\xefl7\x9f\x87?\xdc\x9a\x87\xc3\x95&\xeb?\xec\xfd\xc8\xc2;f\x80\xbfA=\x00\xe0\\\n\xef?\x04\x83\x98\x8f&\x16\xb1\xbfN\x93\xd5\xb3\xeb\x7f\xf5?t\xc2\x15\xda\xf5\xcf\xc4\xbf\x97?\x01J\xc1\xb5\xf5?\xe7b(Q\x15\x13\xa2\xbf>\xa9w\x83A\xb9\xed?<2\xe8\xeep\xd5\xa4\xbf\xd9\xc4\x944j\x1e\xef?\x02#\x06\xec\x9b\x7fc\xbf\xa6\x0c\xc4\x92\xc0\'\xef?\xeb\xa8\xd6\x8a\n\xda\x9b\xbf\x89[\x90\xa2\x05\xae\xf0?&}N\xc2Z\xa0\xbd\xbf\xde\xad\x89tI\xbb\xef?\xc2\x94\x97\xc3P\x80\xb6\xbfiY\x94S\xc4\xc7\xf3?\x9c\x90\x1fk\x19:\xb2?\xc9\xf49\x81-\xd2\xea?\xc8\xde\x01\x87\x00\x06\xc2?\x88\x9a\xc8\xc2\x89\x84\xf3?\xba%\xdfx\'\xe4\xb0?\xa2\xf6\x88\xb9\xe3\x87\xf1?\x84\xc4\xf6\xa08>\xc0\xbf\xc3\x8d.\xd4=\x86\xf4?\xbfJw\xfa\xe0I\xa1\xbf\xbc\xecc\xb2\x16d\xf1?l\xa8\xc1c\xc9\xaeq\xbf\xfa\xfb\xaa8\x1fH\xf5?_\xdd\xfbM\xc2\xd4\xa3?\xaf\xf1\xbeq7\xb2\xed?\xd4\xa9%q~!\x90?\x82AH6\x14\r\xec?Fd"\x8d/"\x86?6\xaeB:0F\xe8?5\xe5\x1dj\x1f\xe7\xcb\xbf\x07\r\x95\x96F#\xf8?6\xe9\xd7\xa7\xfce\xb4\xbf\x8ewS$\x94\x8f\xf2?VP33E\xf2\xa0?\xaa9y\x15\xe7\xa5\xf1?O\xfe*\xdbn\xc6\x9a?\x91\t`\xa7\x86\xf8\xf0?y\xc7\xf9\xe2=,\xb4?X=\x84\x81\x01\x97\xed?\x1f/t\x80\x18\xe7\xab\xbf\xdf\x91\x9b\x9a\xc00\xf0?\xec {\x05G\x1e\x8a\xbf\x8a\x9d{JU\x9a\xf0?\x8a\xe2,\xdf\x06\xea\xbe\xbf\xe8\xc9Q\xa6\xbb\xe6\xf0?\xab\xdd\xbc\xdd/\xa5\xb4\xbf\x1a\xc1\x08\x07\xf4X\xf7?\xde\x07\xd4\xb5S\xa0\xa6\xbf+\xe4\xb7Y\x10\xf9\xea?G\x8a\xc5\x12\x9cj\xb1?M\xfb\x92\xea\xdbb\xea?\x1fDhu"`\xb4\xbfd\xa5\x9a\x8fI\xcd\xf2?\xa3\xd2R\xe6\xeaW\x99\xbf\x9e|\x9c!\xb1\xff\xef?v\xc4\xd3\x8cf=\xab??\xd3\x8d\xcb\xc0N\xec?@\xd8\xb6\xaar"\xb7\xbf^\xdd\x9f6\xc9\x1f\xf6?\x9c"\x06\x08\xfdc\xc6\xbf\xbf\xbf)\xd2R\xcd\xf8?\xa2tN\x1e\x1b4\xa1\xbf(.\xc5\xfd[9\xf0?\x89\xe8\xb4\xca\x92\xe5\xc8?\x1a\xd0-\x882\x81\xea?"N\xfb\xb7\x17\x9f\xd0\xbf\x83\xdc\xcd\x9a\xb1~\xfd?\xcbY\xed\x8a\xa8D}\xbf\xc4\x11\xc2^\x15\xe0\xec?\xd4}&\x11\x80\xa7\xac?\xfb.\x1c\xd5\x8f(\xef?\xac).\x96\xc5\xe7\xea?&\xe0\xb9d\xc9\xb9\xcb?\x10\xb6\x07\xdeU\x88\x99\xbf\xd1\x89\xc5\xb5*\x8a\xf0?\xa6r>\x82=\xfc\xdb\xbfQ\xf6M\xbc\xff-\x02@V\xf1\xcb\x81\x1b@\x98?\xee/\xc6\xf0\x9bf\xf3?\xd3e\xf3x\xcb%\xd1?\x066\x9c\x08\x0b4\xdc?(\x1a\xa6o|\xb7\xa4?{(\x15\xf2]\xae\xec?\xe8^\x1ckEf\xc1\xbf\xfdh\xd8g\x8cy\xf3?ug\x8b{\xc6\xe2\xa7\xbf\xae\xac\xb95\xc8\x85\xf0?j\xe5}\xdf\xe1\x81\xbb\xbf\xb0\x1bUA\xc3~\xf5?}\t\x06\xa9V\xdb\xb3\xbfR\xf7\xdb\x8f\xf8\x19\xf2?\x8b\x13\xeb\xa0\xcb\xb6\x90?\xc5:\x91<\xc0%\xec?\x04`^\x1d\x81t\xd9\xbf\xc4\xf9-\xb5\xe4\xf8\xfb?=L\x9a\x04\x1a\xbc\xb0\xbf\x81\x00\x0f\x0c\xef\xa0\xf0?\xafQ?\x7f\xc6t\xc7\xbf\xd7\xe1\x86E,\xbf\xf7?\xc0\xa7H}2K\x9d?\xaf\xf4\xe1\xd4I\x8f\xeb?VWh\x84\x8fP\xdf?\x07H*\\\xe5\x88\xe1?\x02\x90$P\x7f\xbb\xc3\xbfJ\xc7\xe0\xeb\n_\xf5?F~\x92)\xdf\\\xb1\xbf/g\'8i\xad\xee?\xb3W\xfc=.#\xbf\xbfM\xb2\xb6\x80N[\xf2?\xf5{\x9e\x06\xa8\xec\xae?\xbaf\xe6KY@\xe8?\xaf\x1eC+\x86w\xe5\xbf^Az\xfd\xa5\xd0\x12@\xad\xc8v\xbb\x1fw\xa8\xbf\x08\x9a\xa8\xa4\xfa\xc0\xf2?\x01W\r+\xf1+\xa7?\xb7\xe8\x9c\r/\xe5\xeb?\xe1\x9eS\x1aK\xe4\xa4\xbf\x8f\x97\x06\xe13o\xf1?)&\xc5\x8f\xfa\x0b\x9a?\x86\xbcV\xff\xf3i\xee?I\x96\x15\xde\xe1lr\xbf\x14H9\x8eG\xe6\xec?\xf17\xb9T\xc6,\xb5\xbf\xb7\x0cM\xdcA\x13\xf6?r\xab\x1f\xc5\x97\x0f\xb8?\xc6\xa2\xaa\xb8B\x9b\xf6?^\x16m\xc94\xa3\xb5\xbf\xa3*f\x95\x96\xbf\xf9?J\xaf\xbc\xf9>\x90\xc3\xbfp`\x04">\xa8\xff?\r\xa8\xbb\x86N\x82\xb0\xbfB\xa7\xcf!\xf7~\xef?\xc6\xb1p\x0bT7\xcd?\xcdF\xebz\x0c\xe0\xd9?\xa5C\xc4E\x9d\xa5\xa5\xbf\xec?\xb1\x07\x1a\xca\xee?h\xfe\x8f\x88.\x99\x91?\xd0a\xf1p8\x91\xec?w%b;\xc1\x0c\xe5?pL@\x7f\xed]T?\x0b7\xea\xdc)!}?\xf5D\xb4\xc5\x0b\x19\xef?\xee\x99\xb7\xdd z\xb6?g\xd9/\xe8Zj\xee?\xacp\\\x0e\x12\x93\x97?\xd0\xfe\xab%\xdd\xae\xee?\x08\xdb\x13\x0c\n\x06\xa4\xbf\xf3\x14\xaf]\x03\\\xf1?\xd1\x1bD1s+\xb4\xbfqD\xc5d@\xb0\xf3?\x9f\xf7MF\x03\xa4\xa6\xbf\x149\x9cA\x9es\xf1?\xa8*\xe8!.\xaf\x90\xbf\xc4Rg\x1d\xa9R\xf2?\x8ct\xcd\xc0h+\x92?6\xf0\xe9E/\x9d\xef?\xb1{\xa7W\x05\xed\xa3?\x1a&\xca\xc5g\x83\xf3?C>\x16\x85\xdf\xd1\x93\xbf|\x03\x0b\xb4W\xf7\xf0?U\xe8G\xd7\xb9o\xa4?@I>\xe3\x17\x8f\xec?QQY\xabV\t\x87?\x04?\x91\nl\xdf\xf4?k\xd7(^\x8c%\xa6?\x89\xe5\x02\xd1\xca\x86\xe2?1z\\C\x06\x82\xbb\xbf\x92\xd9\x11oa\xce\xf4?-\xca\xd1&\x10\x8d\xa1\xbf\x8fs~\x0ft%\xf1?2\xbaQ\\C\xc6\xa8\xbf\x0bO9x\xf3\xc6\xf0?\x06\xa8f*\xd8R\xb8\xbf &\xd4\xacU\xa7\xf3?3\xd0y\xfd{_q\xbf\x03\x9f\xe5\xc9\xff:\xf0?\x9ap\xf7sc4\xd0\xbf?p\xb8\x05W\'\xfc?<\x05\xf0\x91x\x1c\xc6\xbf\x9f\x87\xd7\x92\x01!\xf7?\xbf~\x18\xcc\x08\xf9\xd3\xbf\xce\xfc(\xafa\xbd\x00@\xc0\x9cV\xdfy6\xc5\xbf\x13wi\x7fz>\xf1?\x95\xb7q\xe4\x00\'\xcc\xbf\xc6N2\xdb\x13h\x04@\xfeEL?\xe2\xbf\xbf\xbf\xc2o\xda\xba\x01\xfa\xf3?e\xba\x99\xe3\xd5\xbem?\xf4\x83\x14\xb6\xd4\x0f\xfc?0V\xf3\x99.\xd2\x97?\x0ep\x17\x96\x9b\xbb\xe9?\xa0Rr\xfaCyu\xbf\xe5*~T\xba\x8d\xeb?\r\xe9<\x01A\x91\xa0\xbf\xb9\xb2\r\x18C\x10\xef?\xdb*\xcd\xa4<\xfe\xcf?\xcc\r\x0fi\x1f\x9d\xe2?\xca\xc0\xff\xbb\xf2\x01\xaf?\xd0u\x16\x11;l\xf0?e\x00\xd7pc,\x87?X\xdd\x11\x0f\x92\xf9\xeb?0\xe1z\x8d8\xbe}\xbf\xf4eV$\xceM\xf0?\x80\x8b\xe7\xfd\xa3\xb4\xba\xbfZ^\n\x08`\xd6\xf4?\xd3)\xab&\xb1\xc2\xc5\xbf\x03u?\x1f\xa6P\xfa?((\xf5f\x12{\xcf?\xfb\xdd\xe5\x92F\xa9\xe7?K\x8f\xd5\x95\xe9\xca\xb3?]m+l\x0e\xc1\xed?g\x01\xcd\x82)\x91\xad\xbf\x0e\xbb\x9d#\xb4D\xf3?F\xe3-\x00\x83N\xac\xbf|;\xa1"\x0ep\xf1?\xdc\xa6\x0e\x81)r\xa4\xbf\xabc\x1c\xb2\xb0\x89\xf1?'
p154
tp155
bag2
(g3
(I0
tp156
g5
tp157
Rp158
(I1
(I2
I326
tp159
g12
I01
S'\xa1S\xb2\xf7II\xbb\xbf\xec\xde\xd9\x8a\x7f \xf9?\xee\x91?\x98\x1e\xd5\x9f?X\x0b\x07\xc0\xbeQ\xed?U\xf9*.\xbd\xee\xbe?\x98\xeeK\xad8\x8f\xec?2g3\xb7\x90\xc7\xa0\xbf\x1a\x9a\xa1}\xc5s\xf0?\xd73\xf6\xf5\x11g~?+5\x12\x19\x13\x8b\xee?\xdf\xf27\x9d*\xec\xa1\xbf\x94\xde\xef\x7f\xef-\xf3?5?\xe2\xe8n\xc9\x00@\x93\xe1\xa0c\xb4u\xe7\xbfPW\xfc\x01L]\xbf\xbf\xeb\xca(R\x0f\x1a\xf1?{kDD\xd9w\xbb\xbf\xd0\x99\x8dbnr\xf1?1\x8f\x11\xcb\x16\xb7\xc4\xbf\xc5/Z2Q\x92\xf5?\xef>\x89Yyr\x80?\xe6N\xea0\xc8f\xf1?>\xa3\xc6\x8d\xfa\xa3\xa0?l\x1f\x17\xa9\xf3\xa9\xe7?D\xbf\xfb!\xf1\xdf\x91\xbf\x8f\xf7\xd8C\xf5\xe0\xeb?\xf9G\xb0\x03E\xb3\xa0?\xe9\x9e/k\x93h\xeb?\x99\x80\xb8\x8d\xc7\xc3\xa8\xbf,\x85\xaep\xaa\xac\xef?q\x1e\x07\xf7\xc5/\xa6\xbf\xb9YI\x8e\x8c\xa9\xf0?y\xc7 \xb5@U\x98\xbf\xdd\xdbqn\xd7,\xf0?&\xbd\x10[Z}\xa5\xbf\x07\xe2\xb9\x85\xe0\xf6\xf3?z\xf4=\x90\x0e\x1b\xba\xbf\x99\xb4O\xa9B\xf9\xf4?\xd1\xb8H1\xbe\xa4\x92?Zp%\xfd\x01\x89\xf1?\'\x1b\x19ak5\xb4\xbf\xc6\x91\x02\x95\xfb9\xf2?\x85\x18\xc9pt3\xd0?\x11\xa3\x19v\x0f\n\xef?\xda\xf3|!\no\xa5?=p\xc1\x86Rg\xe9?\xea\xc4\x05N\xf0\xcd\xa2?-\xa5E\xd1\x0cy\xef?\x8e\xfbe\xe6\xaf\xaa\xd2\xbfQ[\xc8\xf4@\\\xfa?\xf7\xb4\xa4\x8a\\F\xb0\xbf\xdav\xb5\x8f\x11\xbf\xf2?\x9c\x80\x1fV\xadK\xb1\xbf\x0b\x1e0e|\xf6\xf1?\x18\xb0\xcdy\x87\xb1\xa0\xbf\x90p\xfa\x18)T\xf1?\x81\xd9\xb6p1\xcd\xc8?\x82u\xd6\xe2\x9d\xa7\xe6?\xb1wU \x8b\x81\x8b?\xd4R\xad\x1b-\xf5\xef?\xbd\xc9\xf7\x91xx\xb2\xbfi\xde\x80c\xf7\xe1\xf1?N}Vn\xe5%\xc2?\xb2v\x12\xf3kT\xde?\xa9F\xb7\x95^\x17\xe8\xbf\x0c\xd1\t\xe1F\xc5\x0b@\xa9\x13!\x14 \xea\xb2\xbfy,P\xc8\xaen\xf2?\xf2^\xabG\xb8B\xcf\xbf\x1d\x8b;\xe5\xbc"\xfa?\xf91\xd9\xf8\xf3\x19\xa0?\x1b\xa7,4\x8d1\xee?\x048\xea\x8ch\xb6\xba?\xd0?\xc0\xc4\x8d\xd2\xe9?\x0c\x81\x80\x94\xc1\x07\x99?I\x02\xe4\xb2\xe2/\xeb?\xde\xf3?&(v\xb5\xbf/\xf3\x1c\x11\xe6\xc6\xf4?\xe82\xc5r\xdf\xaa\xb4?k\xaf\xa7\xbc\xb0\xfa\xe9?5\xbe\xe2S)\x8b\x96\xbf(\xee.\x9b\xe5,\xf1?\xb7\xe5i\xbf\x82\t\xa6\xbf<{!\x8e<p\xf1?tW{Zf\x10\xc5\xbfC"\xfdx8\n\xf9?ibh\xa01\xfb\xa1?\x9eP\xbd\xbe\xaf*\xeb?\x06\x81\xfb\xabI\xb5\xb6\xbf\xf1\xa8\xee\xe3&\xc1\xf3?\xdd\xfd*\xde\xedF\xb2\xbf\xf6\x98\xd2q\xb3\x16\xf6?\xc5\x0cD\xbdQ\x02\xf3?\x10\xfc\xb3\xfd\x16\xfe\xbc\xbf\xfb6\xb9\xa3>\xf6\xa8?^?+\xe0;u\xed?\xd8\x81\xb2\xd7\xe7\x1f\xf8\xbf@\xd6\xcc\x83r(\x18@\x9e;? \xe6B\xc0\xbf\xbb\xc0\x9c\x82\x03\r\xf6?\xaa1\xe7ur\x17\xa6\xbf\x10\x93\xc2\xfb\xdb\xcf\xef?\x8b\x80u\xa3p\xc1\xce?\xb3\x9e\' \xc1\xd5\xca?\xb9k2\x1f\xac\x1c\x97?\xa3\xc0\x0c\x81\x9aw\xf0?\xd1wK\xaee\x85\xf5?\x8b8\xb5\xca\xeaA\xed?\xdb\x11\x15$J\x80\xc0?\x82\xfay\xba\x11\x0e\xe3?V8\x17\xf7\x91\x8a\xa6\xbf\x0b\xb3\xb5S\xcdM\xf0?\xb1\xa0\xb3\x14\x03\xd8\xa6\xbf$\xc6\x19\xd7r\xfc\xef?\x8bN\x0c\xdb\xbc\xb3\xa1?n\xec\xd5-\xfa[\xec?\x1aH\x95\x82zJ\xa5?\x95\x11\x92{\xc1t\xe7?{)\xfd\xef\xdcd\xc1\xbf\x08t\r\x88\xae\x1f\xf4?;)\xf7N\xbb4\xb0?)\xd4\x9bG\xf49\xd8?,\x04\xc3\x922\xc0\x9b?3\xde\xf7\xc8\x1f\xaf\xef?Z4[r\x9b \xae\xbf\xdd\x9a\xde^@\x16\xef?|d\x9c\xccL\xf2\xd3\xbf\xb8\xe6\xb0\xf6\xec\xa7\xfa?\xf7\xfdE\xc8\xce\x85\x91?Un\xbb\xfch\xce\xf0?r\xf8\x11\xe8\xe7\x1a\xc1\xbf\x8ft\x1e\xde\x1aa\xef?~\xbe\x030\xd5/\xc4\xbf,\xaa\xa9\xb9\xc3\n\xf4?\xd5\xfd@\xccZn\x92\xbfZT\x1e\x9e\xd8b\xe8?\x07\xcd\xa4k\xc7\x0c\xb0\xbf\xc5\x85\xe7\x1a\x1d\xa8\xee?\x00\x82\xf4\x80\x9f\x86\x99\xbf\xe7-\xd7\xd9-\xbe\xf1?t\x14\x12\xb9r\xed\xc3\xbf\xb9Y\xca\x01\xd7\xf6\xf2?\xb9\xbd)\x9c\x9d\x95\xb6\xbf0\xd2\x12K9\x06\xef?\xc3Q\xed\xd2O\x0b\xa6\xbf\n\\\x0e\x9d{!\xf0?\xb6(\x9b\xc9\xbc\xb8\xb5?!\xba\xd6\x9cD|\xe4?\xcc\x95\xf9S\x16\xb8\xa7?Ed,\\-L\xe2?\xd21\x7f%\x96vo?o!k/\xe9\x84\xec?\r\xe3\xa7\xdd\ne\xb7\xbf\xaf}\xed\x08\x11F\xf3?)\xb0\x0e\xacR\x15\xe9\xbf<\x96\xc5\x0c\xf7\xfc\x0c@\xabI\x98\x1c\x83F\xa3\xbf\x97\xfa\xddx?\xad\xf1?QC~\xb1\xddc\xa3\xbf\xbaf\xef\xba\t&\xef?\x95\x80\x06\xa8\xbd;\xc8\xbf;\xdf\xeb\x01\xfa\xbb\xf0?\xcc\x0f\x8a\xd4`\xb5\xd3?\xfc\x12\xb2\xd6W\xd4\xe8?O7\xdf\xd2\xf5\xba\xb5\xbf\xcb\xd0\x8d\xa8XP\xf0?z\x8b_9\x1f\xf8\xb0\xbfC\xe8\xf3\xf0\x11\xf8\xf2?&`\x12/\xf9w\xc6?\xf7~\xf9\xb9\x89\x8e\xe5?{\xa8^E\xff\x8b\xc0?\x1c\x03\x13k>\x9f\xef?\xc9[\xcd\xf87\xdf\xb1\xbf\t\x0f\x0b\xadL\xec\xef?\xf8\xfe\xdc"Q\x97\xa5\xbf\xa9W.\x8c.?\xf1?\xd7\xb9z\xc8\xb9\xdd\xa1\xbfW\xeb\xc0g\xca/\xf1?\xe9\xd4\xcd\xfb\xe3M\x8b?\xcd1\x12\xb6Q\xbb\xee?\x92B\xe9\xe7P\x18\xa0\xbf\xbf\xae\xed\xcf\xb3M\xf1?pp=\xcf:\'\xa0?H\xc5\xa5T\xfc\x9b\xee?:&\xda\xf6\xb7\x8c\xac\xbf\xaa\xd2\x88V\xc9\xd7\xee?kA\x9fvJ\xb9\xc1?\x9c\xd5\x05\xd7Dl\xe7?\xac\xc0\xc7\xd5v[\xc1?E\xa1\xea\xf5L>\xe2?e\xd7\xe7\rC\xf1\x8e\xbf\xd3+yD\r\n\xf1?M\r\xe0\xf0\xed\xb0\xd0\xbf\xb5z\x88<\xf8\xbe\xfe?I\x9e;\xc4\xde\xd4\xe2\xbf|\xd7q8v\x13\x04@T\x95\xd2\xe5V"\x9d?O*\xf2\x84&(\xe8?!\x0e.]\xe9\xf8,?\xa2h\x8a\x08jQ\xe7?b\x0cD{\xd9\xaa\x93?B\x90\xa1C@p\xf0?Y\xefe\x1b|\xa4\xc1\xbf?\x85U\x93Ud\xf4?\xcd\x1e\xe9\x14D\x82\xb0\xbfn\xf7\r\xd4\xc5\xaf\xf2?\xb6\xd4%\xe7\x14C\xb1\xbf\x15\x12\n\xf3sO\xf1?!\xbc\xad\xec=\xad\xc8\xbf\xfd\xd7\xc3\xb9\x8c2\xf8?\x07\xbb\xca\xd5\xd5D\xa8\xbfs\xc8B7\x85}\xf0?h1\xd6\xad@l\xc6?\xe9T\x8e\xb7\x8b \xf3?\x8bn\xb6\xc9\xf0\xda\xa5\xbf\xad_\xc0I\xf7J\xf2?\xf9&b\xf0\t7\x98?\xf5T\x07\xe3\ne\xf3?\xd8\xaa\xa5\x92#)^\xbf\xc3\x19\xa3\xc5\x1a\xc7\xf0?<\xc6\xb9f\xd6\x0e\xe4?\xf0\xc1\x84\x9d\xd7\xcb\xf8?\xd53\xba>[d\xc5?\xe6u\x1d\x91<\xbf\xf2?\xcc\xce\xa2xX\xfb\xc1\xbf\x0c\x84\xf93\xeaE\xf4?\n\xb4\xa6\xa8\x03\x06\x90?u\xc0\xc2.j\x0f\xe9?^\xed\x9c*\xb4j\xaa\xbf4\x13-\x81@X\xf0?bhy\xd4|\xd8\xb2?\x13\xdc\x9b\xb03k\xe4?>&4ae\x1a\x9f?\x14\x91\xc0\x85z=\xed?1\xa3\xfa\x83\x81\xe2|?\xebv\x895\xcb\xd5\xe9?\xc2\xa8\xf3\x80\x86%\x87\xbf3\xe1\xc7F\x13\xe6\xed?pl\xd5\x12S\x1e\x9b\xbf\x8e\xb6N\xcdu\xae\xf0?\x8dA_ e\xe0\xb2?\xe1\xf4\x83\x9d\xb9\xd1\xe7?\x8b\xd3\xe1\x0f\xf4!\xc7\xbf\x90\xfd}l\xd8E\x05@{\xbe\xecX\x80\xb6\xba\xbfr:\xff\xd7?\x06\xf1?\xaf\xcd7\xc0\xd2\x11\xbc?\x82\xd8\xd1\x06>v\xe3?j\x9a\xb0\x86{\x05\xa6\xbf/\xc1i^\xf9\x7f\xf4?$\x08Z\xd2\x8c\xc2\xa6?!\x9cc*w\x17\xea?(\xfa0/\x99\xde\xb6?\x04l\x9d\x0f\xac>\xe3?\xcf\xd5R\xff\xcc\r\xa2?\x9f\x15C\x9b\x07|\xf0?\x16Y\x14\xa3#\xec\xb4\xbf\xcb\x07\xff\xde\x02\xc0\xf0?\x99-e}\x12\x00\xa5?\n\x14\xa6\x1f\xf5\xae\xea?3{\x16\x01\xdea\xc4\xbfT\x16K\xcb\x1f\n\xf1?\xb3\x1d\xb9L\xdd\xe9\xa8?\xaauP\xcd\x18\xc2\xe9?\xf9\xa0;\xa7MS\xa7\xbf1\xc9Vp\xe2\x86\xf1?.\xc0t\xf4#\x8e\xa7\xbf\xbb\x90w\x81\x0cH\xf3?Z\x0e\xba\x84\xbf\xe1\xc4\xbf8\x80V\x7f\xe4\xca\xf3?F\x0c\xd1\xaf3\xd7\xc0\xbf^^\x19\xc71\xf3\xf3?-\xa9=\x90B\xb2\xf3\xbf\xe5=\xf5!"[\x15@XT[kH\xd9\xc4\xbfCA\xb2v\xca\xc4\xf1?\xbc>\x06\xf4\x88\xe0\xbf\xbf\xa9\xde\xf6\x87\xbd\xb9\xf7?n\xd2\xd5\xba\x94B\xc0\xbf\xcf_B\x8d\x82z\xef?\xff\xd2\xa1|\xf1\xe7\xcf\xbf[\x8a\xc0\x85\xf7%\xfa?\x96\x07\x84z\xeb\\\xb6?y+\x97E<\xa9\xec?\x12U\xe8\xf9\xc3\x1dp\xbf\xcc\xe6(tL4\xf3?\x95\x81\x8a\x84f\x0e\xbf\xbfCK\x9e\xcc\xb0\xc1\xf3?\xa1\x96\xda\xf9\x8e\x0b\xa1\xbf\x96\xc1M\x8f\xd0^\xf2?\x17$\xd3\xbf\xe2\xaa\xc0\xbf\'\x06J\x89\xb1\xa2\xf6?L\x94>.\x1e\xb0\xa5\xbf\x975\xee\xd9c\x0e\xf0?\xf5iC\x92\xb6\xd9\xbe\xbf\x9b[\xe0\xee?\x95\xf5?\x89\xb3\xbe\xb9\xb6\xf3\xb0\xbf\xb9\xb4w\x15\xab\xeb\xf0?\xf4\x16\x07\xe0#J\x95?76\xf8\x88)\xb6\xe8?\xfc\x1e\xc1\xdek\x82\xc1?\xed`}\xbd#\xe1\xef?Fa\x92x\xdd$\xa0\xbf\x9e\x9d3\n\x07\x0f\xf1?\xda\\\xddNv\xd0\x85?#\xfeeU7A\xef?\x1e\xe8\xbc\xb6F\x95\xeb\xbfB\x00\x87\xf8\x80\xd3\x0b@%\x96\x17CD\x7f\xcb\xbf\xa3\xdf\xf4z\xe2\x0b\xfd?S\x07\xfe\x8b\xc8\xc0\xc5\xbf\xe2cQF\x87\x19\x04@\xba\x84\x8d\xe6UH\xb5\xbf\x0540\x8f\xc0\xb7\xf3?c10\xde;\xeb\xb5?(\xff\xb9\xd0g\xee\xe1?\x15\n\\\x17n\xe4\xa3?iV\xb2?\xc3{\xe9?\r\x80\xe0\xa6\xda\xd9\xba\xbf\x9a\xb3\xb4(\x8e/\xf1?:\xb8sA\xa8\x1e\xcd\xbf\x180\xbb\xa8\x8b\x02\xf7?\x82\xa6"wM\xc2\xcb\xbfa\x8f*\xab\x15\x08\xfc?\xc1\x9a\x02\xdf\x18@\xb1\xbf\xf9,|?\x0ci\xf2?E\xd2\x1d\x85\x93\xcd\xb9?\x08p\x15\x03\xaf\xb9\xeb?J\xbe\xe0\x8c\xf5i\xb5?\xda2\xa7\xf2:7\xe7?\xc9C\xd1\x9e\xbfI\xba?m\xa6K\x98\n\x11\xd3?.<\xbf\xe8v\xa9\xc0?K\xcc\xf0Vm\xa8\xee?\x8d\\B\xb6\xaf3\xdb\xbf\x913\xbb\x15\x0c\xc6\x02@V\xd1%\xf2.\xe3\xdd\xbf\x94\x1ew\xdc\xaa=\x03@"\xa6q\xc6\xa1~\xcb\xbfE\xcc\x8e\xb8l\xbe\xf6?\xaf\xbc2GP!\xbd\xbfE\xb99j\xe7X\xf6?\xacr\x82\xb6a\xbe\xc7\xbf0\xf1\xf4\x80\x8a\xef\xf9?7\xc9\x048Z\xc2\xac?\xc1&\xf3\xfe\x17\x0c\xe8?\x94\x12\xcd\x1a\xabX\xbc\xbf\x8atl\x19D\xa7\xf4?\x96\xf7%\x7f\xb8\xee\xad\xbf\xe1i\xb5\x83\x00\x8f\xec?\n\xa8\xae\xa2\xda\xe3j\xbf\xb6\xacu\x8f\x88\x15\xf0?&"\x18$\xd9\x86\x99?_\xd2\x84\xba\x14o\xf1?\xef\xd6Q\xb1o\xf3\xae\xbfA\x87X\x16\xaa:\xf3?+\xf2D\x19\xb8\x93\xc3?\xbd\x9dH;\xfaq\xe9?g>[\x08ex\xbf\xbf\x15s\xaf\xa32R\xf3?S\r\xe2\xbb\x8f\xb7\x92?\x0bRo)\xf70\xf1?\xdbl+\xf7\x05\xed\xd2?K\tq\xa2\xeb&\xe1?\xdd~+\x89\x89\x10\xd0\xbf\x08\xb6?b\xbf\xab\xfd?\xb9\x08\xc6j\x87\xdb\xa9?\xc3\xa5\x89h\xe4\xc1\xed?\xb6\xf1r\xb8S!\xb6\xbf\xe9q{-\xfa\xa2\xf0?\xe3U\xb3x\xdb\x91\xa7?\x90\xe4-\x113g\xec?\xa4\xac*^.\x9b\xaa?\x80S\xd17\xeeu\xf2?\xcf\x0b\xd0\xe1a\x88\x94\xbf\xc6/\x10\x902\xf1\xf0?@\x85U\xab\xed\xf6\xa6?\x1d\xb3\xac\xec\xb4w\xee?LCw\xf7\xdf\x83\x8e\xbf1\x93\xd8\xba*O\xef?\xc1/$\xd4\xadz\xb5\xbfB\x8b[\xe2\xc0\xbb\xf2?A\xd2\xe9\x9co\xba\xa0\xbf\xdav2n:\x95\xf1?\xd7\xb7\xf6\xb3\x7f\x14\xc1\xbfu\xcf0*\xf9k\xf5?m\xbeJ\xc8\xe7\xc0\xd2\xbf\xc8\xaf}\\\r\xe0\xfd?\xc6\x94\x92\xf1(\xd0\xc2\xbf\xc0\xcf=^X\x9c\xf4?]7\x03+\x00?\xd5\xbf\x99\xf6\xd9\x9d\xc4\xc4\xf8?\x1a\x074\x90\xc0-\xc1?*\xb8p[G\xf0\xe4?\xb7+\xd8\xad\xa2m\x99?C\xaeY\xbbY\xaa\xfa?v\x98\x9d\xce\x0f\xcd\xc2\xbf*\xa5*\xaa\x0f\xa0\xf6?2\xf0\x18\xec\xb0\x9e\x97\xbf\x8e\xad\x9d\xe38\xb8\xf2?|O.\x19\x1fQ\xb5\xbf\xa1uY\xad\xad\x9c\xf1?A\xe6\xec\x12\x0e\xb6\xb0\xbf\x17(\xfb\x19\x0f\\\xed?Y\x01\x96\x99\xbb\xd3\xb6\xbf\xf3jD*\xd5=\xeb?)\xf4\xed\x98R\x8e\xc6?\x1d}\xd4\t\xa1\x12\xe9?\xf6\x81\xfa\x86\x83\xcc\xb6\xbf\xfb\xc6\xad>M\xc4\xf9?\xcb;\r\xdb\xfc\x9f\x7f?\xa2\x01\x92\xf1\x1d\x14\xe9?Y\xf2\x84\xd2PK\xb1\xbf\x9b8E\x99\x89\xb9\xf2?[%V\xc1\xd35a?)\x17\xba\xa9\x9b\xfe\xeb?\xcf\x95\xab\xc7Y\x1a\xa7\xbf\xe3\x1ey9z\xc3\xed?\xb2im\x0e\x1c\x8e\xb6?5\x11\xf7\x803U\xdf?\xfbbg\xc1=\x1c\xb5\xbf\xbf\x97\x147\x1c=\xf2?\xbf\xedDr\xe2Z\xbc\xbf+\xc8\xdb.\xa5K\xe6?}\xc9O\xb2"P\xb1?\xff\x85\x97\xb0t\xa9\xea?\xaf4\xe3\xa5g<\xc7\xbfi\xff\xa4\x9d\xc3\x1c\xf5?\x9c\x99\x1b\xc7\x98\xc2\xc3\xbf\xe8f\xd5\xc8\x1e\xbb\xf5?\xab\xf3\x8eDx4\xc1?\xafYEq\x14s\xe9?v\xd2\xba\xca"\x83\x06@\xc9\xb2\xb5X}#\x02@@\xd0\xc6\x8f\x9f\x82\x9d?yc)\x97\xc7\x7f\xf0?\x83T\xc5\xec\xd2A\x9c\xbf\xf9\x03\xf0\xa7tI\xf0?#\xfd\xcaj\xd3bv\xbf\xc1\xe9!\xd4\x0b\xb1\xe8?\xa3\x97\xa7\rG[\xce\xbff\x9eH\xef\x894\xfd?*\xf8e\xc0m)\x9c?6G\x18\xb1j\x9a\xf1?\xe2J\x89\xd5\xec;\xb2\xbf\xd4\xfd1\x90\x0e\xbc\xec?$\x99L\x8f\x8d5\xc6?\x8a\xa2s&\xcb\xfb\xe4?\xd7\xb9\x8b:\xe2\xab\xa9\xbf\xd3\xed\x92\x05uj\xf3?Q_w\xc7E:\xc0?}\xd5F 2\x06\xe7?\xd8\x01\xe6o=\xbe\xd3\xbf\xf7>pDmH\xfc?\xec\xe9\xc9\xe4\x18\xc5\xba?\xd9\xd9\xc8G\x97\x94\xe5?!\xfe\x9b\xa8\r\xbd\xba\xbf\x8b\x03T\xc23\xc0\xf0?\x8e\x06#WK\xbb\x96?sZ\xcf/\xa4&\xe6?\xab+\x8d\xcf\xc8\xff\xc0\xbf\xd4\xd92\xd6\xad\xda\xf4?,q\xed\x85\xf2\x90\xca?\xf4\xf4\x8fw\x0c\x0c\xe6?\xa3\xc8\xf7-\xe6\x83\x9c\xbfz\xb4k\xe8C\xd4\xee?N\x9b\x02\x86d\xd7\xc2\xbf\xc47[:D\xa7\xf3?\xd3\x00\xeeGq7\xb9?\xcbx\x10\xd4\xcd\x9c\xe3?\xb1V\xf0Fgqk\xbf\x16\x91\xf2\xc1\x8a/\xf0?n\xc0%\x13\xdeQ\xa9\xbf\x89\xbc\x9e1\xece\xf1?\xed\xf6\xac\xa3._\xb7\xbfq8+\x81\xea\x88\xe9?N$5\xa6\xdb\x85\xb5\xbf\x1e\x86\xef\x8f?\xd8\xef?\xf9\x12\t\xfa\xbe\xbf\xc0\xbf\xb0\xc1>\xc5Z4\xf3?Q0L\xc5\xd5m\xbc\xbf\xa7\xd4Hm\x86\x93\xf5?\xc0V\x00\n\xd3j\xc7\xbfY~\xc5\xcf\x95T\xfa?*(\xa2\x9f\x801\x9f?\xcbi\xdf\x18\x01Y\xee?\xbb\xcc:\x02\x81\x99\xbd?}\xe3v\x9cxl\xed?}\xa4\x82\xce1\xce\x80?E\xabQ\xcaN\xa6\xed?\t\x9a\x9c\x86yf\x95\xbf\x96\x07K\xb3FT\xed?u\xdc\x15*\xd6\xc4\xbe\xbf\x02*\x1dU\xbd\x1c\xf5?\xe50b\x02B<b?<\x89\xebwz\xea\xe9?\\u}b\x90\xf0\xf7\xbfz\xb4t\xae5\xff\x1d@gIMq6\xcf\xca?\xdf6\xe2\x81\x0f\xea\xe4?\xafk\xfa\x83\xdb\x1d\x84\xbf/\xc4/\x056\x12\xf1?J\xdf\x9f\x88\xccK\xbe\xbf\x967\xc8.\xfb\xc9\xf9?\r\x16\xda\x1a\x99w\xb2\xbf+}+p\x06\xb8\xf3?w\x0f\x10K4\xd5\xae\xbf\x1fq;s:\xf2\xf0?\x8b\r\xbe\xde\r\xbf\xb4\xbf\xd4\xc0U\xf3lU\xf3?i\xd8l\n\xcfl\xab\xbf\xf8\x1560ym\xf1?6\xbe\xadJ\x8c\xa7\xb1\xbf\xb1J4+\xbc\x7f\xf3?\xda#!\xa8e\x03\x96?cLs\x964>\xf0?\x7f\xbfz\xb4\xc0\xcd\xb2\xbf\x8c\x9c\xf1\xfb_\x13\xf4?\xf0\xf6\xf1U\xfa\x8a\x8d\xbf\x84N\x80\x117\xb9\xe7?\xd7+#\xe3\x98R\xc6\xbf\xb2\x00\xf1\x03\xfc\x93\xf8?(9I`\xd0O\xc6\xbfW\x08\xfe\xcb\x1cS\xfa?\xb1\x00Xo\x16\xe5\xd4?1>\n\xc4\xd3\n\xd4?\x9ac\xb6$D\x7f\xd8\xbf^\x0f\xa0\x1e\xa8p\xff?v\x04\x92\xf7\xe31\xab?\x19\xefi\xf8n:\xec?\xf3^?r2\xda\x9c\xbf\x07u\xf1q\xf9\n\xf4?\xc1\x08\x80`2Z\xc2\xbfb\xc3\x973\xf0@\xf0?\xfbr\x84\x8b\xdb\xb6\x82?\xbe!J\xb9\x8b\xe2\xec?"~\x1f\xe4`\x94\xb3\xbf \x138\xf6*z\xf1?\x10\xf7#T\x14x\xb5?t\xb5\xabmD\xdf\xe8?\x02\xfc\x9b\xf8\xf9\x0e\x85\xbf\x82G\xfc\xc1A\x84\xf0?\x1f\xe2\x84\xc1\xa4\xda\xa4\xbf=\x91\xa9\x07iP\xee?\'\xcb\xb9\xa9Y R\xbf9\xb6U\xad+B\xef?\x18\x89\x1e\x07\xd8\x91\xb8\xbf"\xbf<I\x0fQ\xf3?\x9bF\xd0\xd0\xccb\x9a?\x05v\xb2\xbb\xfa\x99\xec?\xc4O\xe9_-/r\xbfa\xb8d.\x7fl\xef?\x06Fo\xa2\xe3\xf9\xbe\xbf\xbb[\xeb\xf6\x97\xc6\xf8?\xc6f\xf2\x7f\'\xe4\xae?v-\x1f\xc4\xb7q\xed?b+\n\xee\xdc\xfa\xc6\xbf\xd0\xfe\r\xd2\x00\x00\x00@\xea\x18\xbf\x86 \x15\x8a\xbf\x1a\x97\xf7\xdd\x0fY\xee?4gO\xbc\x9e\x1d\xad?FO\xcf\xf2O@\xed?\xb6a\x04F\x98.\xba\xbf\xcd/GA\xa9\x11\xf3?\x06.w\xe0\x92U\xcc\xbf,\xaf\xdaV\x1a\x95\xf8?\xd5\x99\x1d\xd2A\r\xdc\xbf%pG\x89\xc9\x1f\x00@\xa7\xa5\xc9\xd2\xd6\xa8\x99?7%1#&9\xea?nc\x8b\xce\xec\x8e\xb0?\xb3\xae\x1e\xbc\xe8f\xe5?N\xe8E0\xb1\x84\xf4?\x991\x15\x05\x16n\xd8\xbf\xe0\xbbp\x13s\xff\xa4\xbfH\x100kWZ\xf1?1\xd3\x8a}\n\xf0\x90?\x8d\x85\x0b\xf8\x0f\x13\xed?\x1c\x8f\xec,\xc2\x95\xce?\x16\xb0PcW\xf2\xea?\x12\xdb\xedE\xfc\xd5\xba?Hl\xb3x4\xe7\xe5?\xca\xca}[}u\xec?\xd8_\xec\xbc}\xad\xc5\xbf\xd7\xed\x01l(\xe7\xa4?9\xf1\x87Z\xac$\xe8?\xa6\x9cjr\x8a\xcc\x98\xbf\xa4U\x80E\xb7\xaa\xe5?[\x04&"z\xb2\xab\xbf\xbf\xb9O\xa8\xfc\xdd\xf2?0\\\xe5#\xc6g\xa2?Q\xa2.\x8c\xb9\x01\xee?\xe9"\xee\xcc\xc8M\xb5\xbf\xb8\x17@/\xb2\x90\xf3?v\xaa\xdb\xfbx\x99\xd3\xbfJ\x0fNMN\x03\x00@\xf1\x1b7\xfe\xd7|\x82\xbf\xa3\xf4n\x922\'\xf1?@*cZ\x9c\xdc\xc3\xbf\x06K[\xe7\xdd\xdb\xf3?\x85\xa1\xa2\xab\x7f\xd0\xc3?q\xd4\xae\xe1v\xde\xe6?7\xf6\xd6d\xc6\xcd\xa4?\x0c7G\xa0\xf5$\xe9?\x0c|\xfa\xe4\x9a\xd4\xc7?\x90C\x82\xc9l\xe3\xef?\x91\xd8\x1c\x1cAn\xaa\xbfQ\xbe\x14L\xac8\xf4?sk\x18\xf5S/\xa7\xbf\xdb7L\xc1\x1a\xd6\xf1?\xb2A\x11\xa9\x0c\xa5\xcc?\xff\xb7/\xe0$]\xe4?`\x98\x06T\xd8\xed\xa2\xbf\xb3G\x99\xc4B8\xf2?v\xfd\xb2\xb2\xb3G\xbd\xbfJ\xec\x01WL\xea\xf0?\xf9\xe2\x90\xc3?\xcf\xd0\xbfY\x1al \x7fE\xf9?c\xe3*\xb0;\x8a\xb5\xbf\xc7\xael\xcc\xf2\xd6\xf3?\xd3\xd9\xc7|\xa4\x81\xb2\xbf\xcf\x01\xb1$\xf3B\xf3?0\xbb\xba\xbf}\xff\xb5?C=(w7\x01\xef?p\xf0\xa7\xd2J\x95\xac\xbfn\xaaU\xd6N\xe6\xfd?\x061\x18-\xf5\x8a\x91\xbf\x14/q+\xd6j\xf0?\xcf`\x08)x\x86\xa8?\xeb-\xbe\xb5\xa9\xfe\xec?@\xcb\xaaZ\xd4r\xb5?[]\xd4\xf0>\xdd\xea?\x9c\x98\xb8\x00\xb50\x97?\x18\xf5\xe5\r\xaaN\xf0?\xb4\xbc\x16\xd5\xbe\x9e\xa0?\xe3g\xecT\x1fB\xea?wdA\x01\xd5\xd9\xad\xbf\x88\xa1t\xb2\xb5\xf5\xec?\xde~{F\xe8\xcc\xb0?\xfbf\x1c0gt\xee?\xf6-\x8e\xc9\x9dr\xc5\xbf"E\x99]\x85X\xf8?\xaf#M`\xec\x19\xb5\xbf\x01T\x8f)1\xf8\xee?\xc7\xa2S\t\x93\x1f\xa4?,\x9a\xbdO.\xf1\xed?\x83}\x9e\xa1\xbeq\xc8\xbf\xef[\x10\xf2\xea\xc8\xf6?=\t\xb7\x81yE\xcd\xbf\xfe\xf4\x92m"j\xf7?\xc0>\xb9\xd0\xa1s\xb8?}hu]\xab[\xef?'
p160
tp161
bag2
(g3
(I0
tp162
g5
tp163
Rp164
(I1
(I2
I107
tp165
g12
I01
S'\x12\xa2&2m}\xc0?kd\xb4\xaa\xd8\xf8\xec?19=\r\xfe\xaa\xd4?\x95"\x00\xdbeY\xe0?\x99\xd7\xe0\xec\xf9F\xbd\xbf\x0f5\xb47M\x90\xf0?Oy\x9f\x81\xa2D\x85?\xf0\x11I\x88\x83\xb7\xef?\xfc=\x1af\xc7\xe6\xd4\xbf\xb8;\xe7\x0f\xa0\xa3\xf9?\x82\xef\xa2\x94\xb2\xb4\xe1\xbf+\xaf\x8c\x9a\xbbA\x05@\xa8\xa0f\x85Z\xd3\xca\xbf\xf0\xb9\xb9\x019\x90\xf2?\x8f\xcf\xf0\xac\xdb^\xd5?v\x82\x9c\xdau+\xe0?\x13\x9eo"\x0cj\xc6?\x0e\x08\x06\xa1\xec\x95\xe4?\x1eS\x88jh\xd7\x9e?w\xa3\x04Q\x87{\xef?\x11\x10\x00\xbb:U\xc9\xbfb\xde\xc6]M\xec\xf6?= \x8dZ\x07F\xdd\xbfC\x8c\xf7\x12U\x99\x00@&3\xec\xc5\xb4\x01\x95?_\x1f\xecpB\xf3\xee?\xc1:\x7f[\x1d\xf1\xb2\xbf\xe7GFn\x1f\x11\xf3?[E\xee\xe6\x97\xc0\xba\xbf\x99\x82\xe9\x08s\xfe\xf0?\xf5\x9f\tr\xb4P\xa7?&\xe3\xfe\xbd\x01W\xe5?<[d\xa9?\xbb\xbc\xbf%\x92\xa3\xd4[)\xf6?\xecNN\x97\xc2\xf0\xc3\xbf\x11\x86K\x19\xe6\xca\xf5?\x88\xee\x94\x95\xb3\xbf\xa0\xbf\xa4\x89\x11p\x10\xb8\xef?\x93\x0b\xe5Oy@\xce?\x97\xfd\xbd\xe2\xbb\xbe\xe1?\x14\x92\x0b\x8a\x0bP\xb7\xbf\xf0DS\xf8B\xe3\xf1?}\x1e\xedK\x0fs\xe2?g\xd5\xb1\xac\xd8\\\xd1?\xe8\x1a\x13\x00\xc9\\\xc3\xbf\x9c\xa4\x03\xd6HK\xf4?\x0b\xeb\xd3x\x818\xbc\xbfl(\xeck\xdc\xec\xef?x<\t\xa0\xd5\xee\xb7\xbft\x95\r\xb2\x92>\xf3?\x81\x1cSy\x0b7w\xbf\x97\xdb\xb3\x04\xca7\xf3?\xdf\xd8k\xae\x89\xcc\x8a\xbf\x96t\x93\xc0c?\xef?t\xe8\xe0\xc7y\xae\xe0\xbf\x9e\xbc\x01\xe5\xaar\x12@\x8e\xf5\xb5\x17\x95g\x8d\xbf\x1b|\xc5J=\xa4\xf1?(}\xd3\xfap\x01\xcc\xbf\x07\x87e\r\x17\x1a\xf7?\xb3\xd2KS\xc3>\xb3\xbf.\xe6-\x1a\xdc\xc3\xed?k\x13\xa5\xdf\xa4\x06\x1c\xc0\xae\x14\xb7c\xd2\x83=@\xe3YEs\xf7\x10\xb4\xbfj\xc6\xea\x83\x96\xdd\xf0?K\xa9 \xd3\xa6\'\xb1?\xc1\x0f\xd8\xaa\x1d\xe8\x01@\xcd&1\xf3T\x81s\xbf?I\xc36\x84\xa5\xf0?\x12E\xea[\xaa\xe9\xc8\xbfh>f\x1aJ\x92\xf7?\xf3J\x86\x9aNZ\xb8\xbf\xeb\xdf\xbc\xeb\xf6Y\xed?\xc1\xe1\x91\xea7\x0e\xc4\xbfd\xeb\xc9\xd4\xb8-\xf4?\xd1\xde\rb\x10o\xa7?:9(\xfbH\xf6\xe5?j\xe7&\xe6\x7fo\xb4\xbf\xc5C\xe93\xfc)\xf2?(\xeb-\x18\x076\xc7?\xec\x88\x88%\xcal\xd9?\xa7\xd2,gb\xd4\xca?\x12\xa7\xbej\x0b\xf3\xe6?\x17\x88\x7f1o\xfe\xc9\xbfwXZ\x16\xec\x95\xf6?\xf6\x9fk\xb2s\\\xb7\xbf\x0f\xb6D\xfcR^\xf5?T\xbaE\x85\xfc\xd5\xca\xbfP[$d\xf2t\xf8?\x9d\xf41\x1a\xd2X\xc5\xbf\xbea\xd5\xc0\x87i\xf4?=G2?\x06\x0b\xc5?\xad\x9d\x95\xb7\xb6\x01\x00@\xc2\xabRO?\xd5\xa2?\xa5x\x1f\x18\xb3\x7f\xe6?W%\x82\xb5\xba\xfb\xb1\xbf\xbf=\x99\x93\'(\xeb?"\'\x8a\x8a\x12V\x9e?\x9d<\x99e\xc8;\xf6?\xee\xa4[\xea\xfd\x83\xc2\xbf\x03\x9b1\xd1\xc7\xcb\xf5?\x05\x04\xc9a\xe4(\x14@ \xfa\xc1\x9e\xf4k\x10\xc0\x02@Y;!\xed\xb0\xbf\xc7j\x89\x0f\xda6\xf3?\xd1l#55\x8b\x9b\xbf\x8a,\xc5\xe5\xc7\n\xef?\x88\xff\xf7\x18\xbd%\xcf\xbf4og\x02\xd3;\xf6?\xa2\xa7;d\x1a\xe6\xa9\xbf\xca\x99Ua\xd08\xf2?\xe8\xb2g\x9a\x10\x8b\xbe\xbf\xf9\x17\xccnJ\x96\xf1?.F\xc5iR\xa2\xc2\xbf\xd7\x87\'\xa1x\xb3\xec?\xd5\xc2*\xd5\xea\xe9\xa4?\xc6\xb0+\xe9OF\xed?\x02\xc8\xdb\xbc6V\xed\xbf]v\xbf\xc74R\x10@x\xb3\\(\xcc=\xc0?\xde\x98z!\x17S\xed?A7\x06\xa4\xc7\xfc\xb5?\'\xf0^\xbb\x1b\xce\xea?u\xd3\x1a\xea\xd4i\xc5?\xbf\xd0O\x07\xa1T\xde?\x0c[\x9e\x98\xdc\x06\xd5\xbf\xc4o2\xc8bi\xff?\x82<\x8f7\x17\xe0\xcc\xbf\xf4\xde\n(\xfd\x1b\xf9?a\xe6\xba:\xefX\x92\xbf\x82G\xa5\xc99\xdc\xf2?@\x12\x89eS!d@W^T?\x12\x01d\xc0\xcc\x88\x03\xfe\xf4\xd1\xa6?G\xd0\xe4\x82\xc2\x9f\xe4?\x8a\xa8\x15\xceR4\xc4?"[8V \xd3\xe6?S\xf1\x972aq\x9c\xbf\xce+\x9f%\xe8\x83\xef?\xa7M7:ev\xae\xbf\x07\xf8gK\xf4\x8b\xf4?\xa3\x040u\x1f\xc4\xa4\xbf\xb0\x11\xfan\xd5\xf6\xed?\x84\x99\x8f\xd1\xeb\x9b\xd3\xbf\xec\xb9\xc6s\x1bz\xf7?\xe4\x7f\xc8\x9a\xb9P\xc9?\x01\xbe\x18\x89\xe3y\xd3?y\xba\xe1,\xd6X\xad\xbf=a\x90p\'d\xf3?\x18\xa5&\xf3G\xcb\xaf\xbf-\x1e\xaaq\xaa\xda\xee?\xd5[\xf6\x13E\xdb\x86\xbfp\xe2&\x0cqs\xee?a\xcc\x033j\xbf\xb3\xbfL\xd7\xd6\xf3\xd6\xd9\xf1?t\xa2\xcf\x1d\xea\n\xe8\xbfF\xb5\x1f\xa1\x91\xc3\x07@&\xdc\xf1a0\x92\xbf\xbf\xa6\x90\xcc9^W\xf0?\xfa\x8f\xfbxw\xdd\xa9\xbf\xca\xe6\x9f\xb9e\x95\xef?\xc7\x80\xeew\x8f\xae\x9e\xbf\xf1\xe2\xfe\xe6\xaf\xf9\xe8?\x1f\t\xf8\\\xa4)\xb2\xbfz@\xf2>\xe6N\xf0?\x89^O,QF\xc4\xbf\xda\xf0\x15^i\x19\xf6?U\x05$\x13\xed\xec\x9e\xbf0\xdbJ\xf3\xfe\xd4\xf0?\xbd\xfb\x9d/\x0e"\xb6\xbfmG-\xd5z\x0f\xf3?\xf1\xe2\x82\x13f\xe7\xcc\xbf\xf2\xf8*.\xae\xc6\xf9?\x0c\xf8\xb73\xd7\x9d\xbc\xbf\x18\xb1\x98k\xb7\xee\xf0?lk@A\x8d\xf4\xd0\xbf\xc40\x01>\xfc\x90\xf7?}\xd2o\x10\xab8b\xbfT\xb8n\xc9\xe4\x89\xef?\xf4\xea\x8bb\x9f\x7f\xe2?\xf0QX\xcc\x93<\xcb?\x9b\xa8o\xa7i\x9c\x85?\xe3\xaa\xf9\xe5U\xfa\xed?J\x04N\xa4\'}\xbd\xbf\x8b\xeb\x97*?|\xf3?\xda\xc3Q\nb\xea\xc1\xbf\x8e\xffYU\x9c\xaf\xf3?\x99\x17Z\xda\xaf\x8b\x8e?\x8d\xe5i\xfe\xc2_\xf1?P*e:Kh\xa8?\xed><\xe5\xd2\xab\xed?c8|\xf1[\xb8\xda\xbf2V\x88\x86V\xbb\xfe?K=5g\'h\xc6\xbf^\xe1\x0f\x01\xa8\x9f\xf3?\xb1>\xb6\r\xc0\xaa\xf6\xbft\xce\xeb\xea\xd7\x9e\x16@E\xee\x9e\xde\xd3\x13\xa9\xbf?\x8b\x88vm\xbf\xf0?\x9b%\xac\x90\xf2\xe8\xa9?\x1d\xe9\xfc\xd7\xef~\xf2?~\xc7\x11\xd8\xc3\xdf\xa7\xbf\xce\x95\'\xbdBn\xf0?c\xad\x1f\xff\x90\x8b\xd2\xbfk\x93\xe5\xe3V\xd6\xfa?\xce0\x80\xec\xd5\xaaw\xbf?\xb0\xf8,?\x06\xee?\xd1\xd5~\xf5S\x0b\xbd\xbf\x0fAry=\x99\xf1?\xef\xb6\xe0\xd5\xfa\xc0\xa0?\xdcq\x1b#D]\xeb?_\xd8\x89[]J\xc3?v\xa8\nt\xfc]\xee?'
p166
tp167
baa(lp168
g2
(g3
(I0
tp169
g5
tp170
Rp171
(I1
(I2
I64
tp172
g12
I01
S'\xc4\xfcC\xc9\xe0j\x98\xbc\xfc\xff\xff\xff\xff\xff\xef?\xc4\xfcC\xc9\xe0j\x98\xbc\xfc\xff\xff\xff\xff\xff\xef?\xc4\xfcC\xc9\xe0j\x98\xbc\xfc\xff\xff\xff\xff\xff\xef?\xc4\xfcC\xc9\xe0j\x98\xbc\xfc\xff\xff\xff\xff\xff\xef?\xc4\xfcC\xc9\xe0j\x98\xbc\xfc\xff\xff\xff\xff\xff\xef?\xc4\xfcC\xc9\xe0j\x98\xbc\xfc\xff\xff\xff\xff\xff\xef?\xc4\xfcC\xc9\xe0j\x98\xbc\xfc\xff\xff\xff\xff\xff\xef?\xc4\xfcC\xc9\xe0j\x98\xbc\xfc\xff\xff\xff\xff\xff\xef?\xc4\xfcC\xc9\xe0j\x98\xbc\xfc\xff\xff\xff\xff\xff\xef?\xc4\xfcC\xc9\xe0j\x98\xbc\xfc\xff\xff\xff\xff\xff\xef?\xc4\xfcC\xc9\xe0j\x98\xbc\xfc\xff\xff\xff\xff\xff\xef?\xc4\xfcC\xc9\xe0j\x98\xbc\xfc\xff\xff\xff\xff\xff\xef?\xc4\xfcC\xc9\xe0j\x98\xbc\xfc\xff\xff\xff\xff\xff\xef?\xc4\xfcC\xc9\xe0j\x98\xbc\xfc\xff\xff\xff\xff\xff\xef?\xc4\xfcC\xc9\xe0j\x98\xbc\xfc\xff\xff\xff\xff\xff\xef?\xc4\xfcC\xc9\xe0j\x98\xbc\xfc\xff\xff\xff\xff\xff\xef?\xc4\xfcC\xc9\xe0j\x98\xbc\xfc\xff\xff\xff\xff\xff\xef?\xc4\xfcC\xc9\xe0j\x98\xbc\xfc\xff\xff\xff\xff\xff\xef?\xc4\xfcC\xc9\xe0j\x98\xbc\xfc\xff\xff\xff\xff\xff\xef?\xc4\xfcC\xc9\xe0j\x98\xbc\xfc\xff\xff\xff\xff\xff\xef?\xc4\xfcC\xc9\xe0j\x98\xbc\xfc\xff\xff\xff\xff\xff\xef?\xc4\xfcC\xc9\xe0j\x98\xbc\xfc\xff\xff\xff\xff\xff\xef?\xc4\xfcC\xc9\xe0j\x98\xbc\xfc\xff\xff\xff\xff\xff\xef?\xc4\xfcC\xc9\xe0j\x98\xbc\xfc\xff\xff\xff\xff\xff\xef?\xc4\xfcC\xc9\xe0j\x98\xbc\xfc\xff\xff\xff\xff\xff\xef?\xc4\xfcC\xc9\xe0j\x98\xbc\xfc\xff\xff\xff\xff\xff\xef?\xc4\xfcC\xc9\xe0j\x98\xbc\xfc\xff\xff\xff\xff\xff\xef?\xc4\xfcC\xc9\xe0j\x98\xbc\xfc\xff\xff\xff\xff\xff\xef?\xc4\xfcC\xc9\xe0j\x98\xbc\xfc\xff\xff\xff\xff\xff\xef?\xc4\xfcC\xc9\xe0j\x98\xbc\xfc\xff\xff\xff\xff\xff\xef?\xc4\xfcC\xc9\xe0j\x98\xbc\xfc\xff\xff\xff\xff\xff\xef?\xc4\xfcC\xc9\xe0j\x98\xbc\xfc\xff\xff\xff\xff\xff\xef?\xc4\xfcC\xc9\xe0j\x98\xbc\xfc\xff\xff\xff\xff\xff\xef?\xc4\xfcC\xc9\xe0j\x98\xbc\xfc\xff\xff\xff\xff\xff\xef?\xc4\xfcC\xc9\xe0j\x98\xbc\xfc\xff\xff\xff\xff\xff\xef?\xc4\xfcC\xc9\xe0j\x98\xbc\xfc\xff\xff\xff\xff\xff\xef?\xc4\xfcC\xc9\xe0j\x98\xbc\xfc\xff\xff\xff\xff\xff\xef?\xc4\xfcC\xc9\xe0j\x98\xbc\xfc\xff\xff\xff\xff\xff\xef?\xc4\xfcC\xc9\xe0j\x98\xbc\xfc\xff\xff\xff\xff\xff\xef?\xc4\xfcC\xc9\xe0j\x98\xbc\xfc\xff\xff\xff\xff\xff\xef?\xc4\xfcC\xc9\xe0j\x98\xbc\xfc\xff\xff\xff\xff\xff\xef?\xc4\xfcC\xc9\xe0j\x98\xbc\xfc\xff\xff\xff\xff\xff\xef?\xc4\xfcC\xc9\xe0j\x98\xbc\xfc\xff\xff\xff\xff\xff\xef?\xc4\xfcC\xc9\xe0j\x98\xbc\xfc\xff\xff\xff\xff\xff\xef?\xc4\xfcC\xc9\xe0j\x98\xbc\xfc\xff\xff\xff\xff\xff\xef?\xc4\xfcC\xc9\xe0j\x98\xbc\xfc\xff\xff\xff\xff\xff\xef?\xc4\xfcC\xc9\xe0j\x98\xbc\xfc\xff\xff\xff\xff\xff\xef?\xc4\xfcC\xc9\xe0j\x98\xbc\xfc\xff\xff\xff\xff\xff\xef?\xc4\xfcC\xc9\xe0j\x98\xbc\xfc\xff\xff\xff\xff\xff\xef?\xc4\xfcC\xc9\xe0j\x98\xbc\xfc\xff\xff\xff\xff\xff\xef?\xc4\xfcC\xc9\xe0j\x98\xbc\xfc\xff\xff\xff\xff\xff\xef?\xc4\xfcC\xc9\xe0j\x98\xbc\xfc\xff\xff\xff\xff\xff\xef?\xc4\xfcC\xc9\xe0j\x98\xbc\xfc\xff\xff\xff\xff\xff\xef?\xc4\xfcC\xc9\xe0j\x98\xbc\xfc\xff\xff\xff\xff\xff\xef?\xc4\xfcC\xc9\xe0j\x98\xbc\xfc\xff\xff\xff\xff\xff\xef?\xc4\xfcC\xc9\xe0j\x98\xbc\xfc\xff\xff\xff\xff\xff\xef?\xc4\xfcC\xc9\xe0j\x98\xbc\xfc\xff\xff\xff\xff\xff\xef?\xc4\xfcC\xc9\xe0j\x98\xbc\xfc\xff\xff\xff\xff\xff\xef?\xc4\xfcC\xc9\xe0j\x98\xbc\xfc\xff\xff\xff\xff\xff\xef?\xc4\xfcC\xc9\xe0j\x98\xbc\xfc\xff\xff\xff\xff\xff\xef?\xc4\xfcC\xc9\xe0j\x98\xbc\xfc\xff\xff\xff\xff\xff\xef?\xc4\xfcC\xc9\xe0j\x98\xbc\xfc\xff\xff\xff\xff\xff\xef?\xc4\xfcC\xc9\xe0j\x98\xbc\xfc\xff\xff\xff\xff\xff\xef?\xc4\xfcC\xc9\xe0j\x98\xbc\xfc\xff\xff\xff\xff\xff\xef?'
p173
tp174
bag2
(g3
(I0
tp175
g5
tp176
Rp177
(I1
(I2
I64
tp178
g12
I01
S'\xc4\xfcC\xc9\xe0j\x98\xbc\xfc\xff\xff\xff\xff\xff\xef?\xc4\xfcC\xc9\xe0j\x98\xbc\xfc\xff\xff\xff\xff\xff\xef?\xc4\xfcC\xc9\xe0j\x98\xbc\xfc\xff\xff\xff\xff\xff\xef?\xc4\xfcC\xc9\xe0j\x98\xbc\xfc\xff\xff\xff\xff\xff\xef?\xc4\xfcC\xc9\xe0j\x98\xbc\xfc\xff\xff\xff\xff\xff\xef?\xc4\xfcC\xc9\xe0j\x98\xbc\xfc\xff\xff\xff\xff\xff\xef?\xc4\xfcC\xc9\xe0j\x98\xbc\xfc\xff\xff\xff\xff\xff\xef?\xc4\xfcC\xc9\xe0j\x98\xbc\xfc\xff\xff\xff\xff\xff\xef?\xc4\xfcC\xc9\xe0j\x98\xbc\xfc\xff\xff\xff\xff\xff\xef?\xc4\xfcC\xc9\xe0j\x98\xbc\xfc\xff\xff\xff\xff\xff\xef?\xc4\xfcC\xc9\xe0j\x98\xbc\xfc\xff\xff\xff\xff\xff\xef?\xc4\xfcC\xc9\xe0j\x98\xbc\xfc\xff\xff\xff\xff\xff\xef?\xc4\xfcC\xc9\xe0j\x98\xbc\xfc\xff\xff\xff\xff\xff\xef?\xc4\xfcC\xc9\xe0j\x98\xbc\xfc\xff\xff\xff\xff\xff\xef?\xc4\xfcC\xc9\xe0j\x98\xbc\xfc\xff\xff\xff\xff\xff\xef?\xc4\xfcC\xc9\xe0j\x98\xbc\xfc\xff\xff\xff\xff\xff\xef?\xc4\xfcC\xc9\xe0j\x98\xbc\xfc\xff\xff\xff\xff\xff\xef?\xc4\xfcC\xc9\xe0j\x98\xbc\xfc\xff\xff\xff\xff\xff\xef?\xc4\xfcC\xc9\xe0j\x98\xbc\xfc\xff\xff\xff\xff\xff\xef?\xc4\xfcC\xc9\xe0j\x98\xbc\xfc\xff\xff\xff\xff\xff\xef?\xc4\xfcC\xc9\xe0j\x98\xbc\xfc\xff\xff\xff\xff\xff\xef?\xc4\xfcC\xc9\xe0j\x98\xbc\xfc\xff\xff\xff\xff\xff\xef?\xc4\xfcC\xc9\xe0j\x98\xbc\xfc\xff\xff\xff\xff\xff\xef?\xc4\xfcC\xc9\xe0j\x98\xbc\xfc\xff\xff\xff\xff\xff\xef?\xc4\xfcC\xc9\xe0j\x98\xbc\xfc\xff\xff\xff\xff\xff\xef?\xc4\xfcC\xc9\xe0j\x98\xbc\xfc\xff\xff\xff\xff\xff\xef?\xc4\xfcC\xc9\xe0j\x98\xbc\xfc\xff\xff\xff\xff\xff\xef?\xc4\xfcC\xc9\xe0j\x98\xbc\xfc\xff\xff\xff\xff\xff\xef?\xc4\xfcC\xc9\xe0j\x98\xbc\xfc\xff\xff\xff\xff\xff\xef?\xc4\xfcC\xc9\xe0j\x98\xbc\xfc\xff\xff\xff\xff\xff\xef?\xc4\xfcC\xc9\xe0j\x98\xbc\xfc\xff\xff\xff\xff\xff\xef?\xc4\xfcC\xc9\xe0j\x98\xbc\xfc\xff\xff\xff\xff\xff\xef?\xc4\xfcC\xc9\xe0j\x98\xbc\xfc\xff\xff\xff\xff\xff\xef?\xc4\xfcC\xc9\xe0j\x98\xbc\xfc\xff\xff\xff\xff\xff\xef?\xc4\xfcC\xc9\xe0j\x98\xbc\xfc\xff\xff\xff\xff\xff\xef?\xc4\xfcC\xc9\xe0j\x98\xbc\xfc\xff\xff\xff\xff\xff\xef?\xc4\xfcC\xc9\xe0j\x98\xbc\xfc\xff\xff\xff\xff\xff\xef?\xc4\xfcC\xc9\xe0j\x98\xbc\xfc\xff\xff\xff\xff\xff\xef?\xc4\xfcC\xc9\xe0j\x98\xbc\xfc\xff\xff\xff\xff\xff\xef?\xc4\xfcC\xc9\xe0j\x98\xbc\xfc\xff\xff\xff\xff\xff\xef?\xc4\xfcC\xc9\xe0j\x98\xbc\xfc\xff\xff\xff\xff\xff\xef?\xc4\xfcC\xc9\xe0j\x98\xbc\xfc\xff\xff\xff\xff\xff\xef?\xc4\xfcC\xc9\xe0j\x98\xbc\xfc\xff\xff\xff\xff\xff\xef?\xc4\xfcC\xc9\xe0j\x98\xbc\xfc\xff\xff\xff\xff\xff\xef?\xc4\xfcC\xc9\xe0j\x98\xbc\xfc\xff\xff\xff\xff\xff\xef?\xc4\xfcC\xc9\xe0j\x98\xbc\xfc\xff\xff\xff\xff\xff\xef?\xc4\xfcC\xc9\xe0j\x98\xbc\xfc\xff\xff\xff\xff\xff\xef?\xc4\xfcC\xc9\xe0j\x98\xbc\xfc\xff\xff\xff\xff\xff\xef?\xc4\xfcC\xc9\xe0j\x98\xbc\xfc\xff\xff\xff\xff\xff\xef?\xc4\xfcC\xc9\xe0j\x98\xbc\xfc\xff\xff\xff\xff\xff\xef?\xc4\xfcC\xc9\xe0j\x98\xbc\xfc\xff\xff\xff\xff\xff\xef?\xc4\xfcC\xc9\xe0j\x98\xbc\xfc\xff\xff\xff\xff\xff\xef?\xc4\xfcC\xc9\xe0j\x98\xbc\xfc\xff\xff\xff\xff\xff\xef?\xc4\xfcC\xc9\xe0j\x98\xbc\xfc\xff\xff\xff\xff\xff\xef?\xc4\xfcC\xc9\xe0j\x98\xbc\xfc\xff\xff\xff\xff\xff\xef?\xc4\xfcC\xc9\xe0j\x98\xbc\xfc\xff\xff\xff\xff\xff\xef?\xc4\xfcC\xc9\xe0j\x98\xbc\xfc\xff\xff\xff\xff\xff\xef?\xc4\xfcC\xc9\xe0j\x98\xbc\xfc\xff\xff\xff\xff\xff\xef?\xc4\xfcC\xc9\xe0j\x98\xbc\xfc\xff\xff\xff\xff\xff\xef?\xc4\xfcC\xc9\xe0j\x98\xbc\xfc\xff\xff\xff\xff\xff\xef?\xc4\xfcC\xc9\xe0j\x98\xbc\xfc\xff\xff\xff\xff\xff\xef?\xc4\xfcC\xc9\xe0j\x98\xbc\xfc\xff\xff\xff\xff\xff\xef?\xc4\xfcC\xc9\xe0j\x98\xbc\xfc\xff\xff\xff\xff\xff\xef?\xc4\xfcC\xc9\xe0j\x98\xbc\xfc\xff\xff\xff\xff\xff\xef?'
p179
tp180
bag2
(g3
(I0
tp181
g5
tp182
Rp183
(I1
(I2
I128
tp184
g12
I01
S'\xc4\xfcC\xc9\xe0j\x98\xbc\xfc\xff\xff\xff\xff\xff\xef?\xc4\xfcC\xc9\xe0j\x98\xbc\xfc\xff\xff\xff\xff\xff\xef?\xc4\xfcC\xc9\xe0j\x98\xbc\xfc\xff\xff\xff\xff\xff\xef?\xc4\xfcC\xc9\xe0j\x98\xbc\xfc\xff\xff\xff\xff\xff\xef?\xc4\xfcC\xc9\xe0j\x98\xbc\xfc\xff\xff\xff\xff\xff\xef?\xc4\xfcC\xc9\xe0j\x98\xbc\xfc\xff\xff\xff\xff\xff\xef?\xc4\xfcC\xc9\xe0j\x98\xbc\xfc\xff\xff\xff\xff\xff\xef?\xc4\xfcC\xc9\xe0j\x98\xbc\xfc\xff\xff\xff\xff\xff\xef?\xc4\xfcC\xc9\xe0j\x98\xbc\xfc\xff\xff\xff\xff\xff\xef?\xc4\xfcC\xc9\xe0j\x98\xbc\xfc\xff\xff\xff\xff\xff\xef?\xc4\xfcC\xc9\xe0j\x98\xbc\xfc\xff\xff\xff\xff\xff\xef?\xc4\xfcC\xc9\xe0j\x98\xbc\xfc\xff\xff\xff\xff\xff\xef?\xc4\xfcC\xc9\xe0j\x98\xbc\xfc\xff\xff\xff\xff\xff\xef?\xc4\xfcC\xc9\xe0j\x98\xbc\xfc\xff\xff\xff\xff\xff\xef?\xc4\xfcC\xc9\xe0j\x98\xbc\xfc\xff\xff\xff\xff\xff\xef?\xc4\xfcC\xc9\xe0j\x98\xbc\xfc\xff\xff\xff\xff\xff\xef?\xc4\xfcC\xc9\xe0j\x98\xbc\xfc\xff\xff\xff\xff\xff\xef?\xc4\xfcC\xc9\xe0j\x98\xbc\xfc\xff\xff\xff\xff\xff\xef?\xc4\xfcC\xc9\xe0j\x98\xbc\xfc\xff\xff\xff\xff\xff\xef?\xc4\xfcC\xc9\xe0j\x98\xbc\xfc\xff\xff\xff\xff\xff\xef?\xc4\xfcC\xc9\xe0j\x98\xbc\xfc\xff\xff\xff\xff\xff\xef?\xc4\xfcC\xc9\xe0j\x98\xbc\xfc\xff\xff\xff\xff\xff\xef?\xc4\xfcC\xc9\xe0j\x98\xbc\xfc\xff\xff\xff\xff\xff\xef?\xc4\xfcC\xc9\xe0j\x98\xbc\xfc\xff\xff\xff\xff\xff\xef?\xc4\xfcC\xc9\xe0j\x98\xbc\xfc\xff\xff\xff\xff\xff\xef?\xc4\xfcC\xc9\xe0j\x98\xbc\xfc\xff\xff\xff\xff\xff\xef?\xc4\xfcC\xc9\xe0j\x98\xbc\xfc\xff\xff\xff\xff\xff\xef?\xc4\xfcC\xc9\xe0j\x98\xbc\xfc\xff\xff\xff\xff\xff\xef?\xc4\xfcC\xc9\xe0j\x98\xbc\xfc\xff\xff\xff\xff\xff\xef?\xc4\xfcC\xc9\xe0j\x98\xbc\xfc\xff\xff\xff\xff\xff\xef?\xc4\xfcC\xc9\xe0j\x98\xbc\xfc\xff\xff\xff\xff\xff\xef?\xc4\xfcC\xc9\xe0j\x98\xbc\xfc\xff\xff\xff\xff\xff\xef?\xc4\xfcC\xc9\xe0j\x98\xbc\xfc\xff\xff\xff\xff\xff\xef?\xc4\xfcC\xc9\xe0j\x98\xbc\xfc\xff\xff\xff\xff\xff\xef?\xc4\xfcC\xc9\xe0j\x98\xbc\xfc\xff\xff\xff\xff\xff\xef?\xc4\xfcC\xc9\xe0j\x98\xbc\xfc\xff\xff\xff\xff\xff\xef?\xc4\xfcC\xc9\xe0j\x98\xbc\xfc\xff\xff\xff\xff\xff\xef?\xc4\xfcC\xc9\xe0j\x98\xbc\xfc\xff\xff\xff\xff\xff\xef?\xc4\xfcC\xc9\xe0j\x98\xbc\xfc\xff\xff\xff\xff\xff\xef?\xc4\xfcC\xc9\xe0j\x98\xbc\xfc\xff\xff\xff\xff\xff\xef?\xc4\xfcC\xc9\xe0j\x98\xbc\xfc\xff\xff\xff\xff\xff\xef?\xc4\xfcC\xc9\xe0j\x98\xbc\xfc\xff\xff\xff\xff\xff\xef?\xc4\xfcC\xc9\xe0j\x98\xbc\xfc\xff\xff\xff\xff\xff\xef?\xc4\xfcC\xc9\xe0j\x98\xbc\xfc\xff\xff\xff\xff\xff\xef?\xc4\xfcC\xc9\xe0j\x98\xbc\xfc\xff\xff\xff\xff\xff\xef?\xc4\xfcC\xc9\xe0j\x98\xbc\xfc\xff\xff\xff\xff\xff\xef?\xc4\xfcC\xc9\xe0j\x98\xbc\xfc\xff\xff\xff\xff\xff\xef?\xc4\xfcC\xc9\xe0j\x98\xbc\xfc\xff\xff\xff\xff\xff\xef?\xc4\xfcC\xc9\xe0j\x98\xbc\xfc\xff\xff\xff\xff\xff\xef?\xc4\xfcC\xc9\xe0j\x98\xbc\xfc\xff\xff\xff\xff\xff\xef?\xc4\xfcC\xc9\xe0j\x98\xbc\xfc\xff\xff\xff\xff\xff\xef?\xc4\xfcC\xc9\xe0j\x98\xbc\xfc\xff\xff\xff\xff\xff\xef?\xc4\xfcC\xc9\xe0j\x98\xbc\xfc\xff\xff\xff\xff\xff\xef?\xc4\xfcC\xc9\xe0j\x98\xbc\xfc\xff\xff\xff\xff\xff\xef?\xc4\xfcC\xc9\xe0j\x98\xbc\xfc\xff\xff\xff\xff\xff\xef?\xc4\xfcC\xc9\xe0j\x98\xbc\xfc\xff\xff\xff\xff\xff\xef?\xc4\xfcC\xc9\xe0j\x98\xbc\xfc\xff\xff\xff\xff\xff\xef?\xc4\xfcC\xc9\xe0j\x98\xbc\xfc\xff\xff\xff\xff\xff\xef?\xc4\xfcC\xc9\xe0j\x98\xbc\xfc\xff\xff\xff\xff\xff\xef?\xc4\xfcC\xc9\xe0j\x98\xbc\xfc\xff\xff\xff\xff\xff\xef?\xc4\xfcC\xc9\xe0j\x98\xbc\xfc\xff\xff\xff\xff\xff\xef?\xc4\xfcC\xc9\xe0j\x98\xbc\xfc\xff\xff\xff\xff\xff\xef?\xc4\xfcC\xc9\xe0j\x98\xbc\xfc\xff\xff\xff\xff\xff\xef?\xc4\xfcC\xc9\xe0j\x98\xbc\xfc\xff\xff\xff\xff\xff\xef?\xc4\xfcC\xc9\xe0j\x98\xbc\xfc\xff\xff\xff\xff\xff\xef?\xc4\xfcC\xc9\xe0j\x98\xbc\xfc\xff\xff\xff\xff\xff\xef?\xc4\xfcC\xc9\xe0j\x98\xbc\xfc\xff\xff\xff\xff\xff\xef?\xc4\xfcC\xc9\xe0j\x98\xbc\xfc\xff\xff\xff\xff\xff\xef?\xc4\xfcC\xc9\xe0j\x98\xbc\xfc\xff\xff\xff\xff\xff\xef?\xc4\xfcC\xc9\xe0j\x98\xbc\xfc\xff\xff\xff\xff\xff\xef?\xc4\xfcC\xc9\xe0j\x98\xbc\xfc\xff\xff\xff\xff\xff\xef?\xc4\xfcC\xc9\xe0j\x98\xbc\xfc\xff\xff\xff\xff\xff\xef?\xc4\xfcC\xc9\xe0j\x98\xbc\xfc\xff\xff\xff\xff\xff\xef?\xc4\xfcC\xc9\xe0j\x98\xbc\xfc\xff\xff\xff\xff\xff\xef?\xc4\xfcC\xc9\xe0j\x98\xbc\xfc\xff\xff\xff\xff\xff\xef?\xc4\xfcC\xc9\xe0j\x98\xbc\xfc\xff\xff\xff\xff\xff\xef?\xc4\xfcC\xc9\xe0j\x98\xbc\xfc\xff\xff\xff\xff\xff\xef?\xc4\xfcC\xc9\xe0j\x98\xbc\xfc\xff\xff\xff\xff\xff\xef?\xc4\xfcC\xc9\xe0j\x98\xbc\xfc\xff\xff\xff\xff\xff\xef?\xc4\xfcC\xc9\xe0j\x98\xbc\xfc\xff\xff\xff\xff\xff\xef?\xc4\xfcC\xc9\xe0j\x98\xbc\xfc\xff\xff\xff\xff\xff\xef?\xc4\xfcC\xc9\xe0j\x98\xbc\xfc\xff\xff\xff\xff\xff\xef?\xc4\xfcC\xc9\xe0j\x98\xbc\xfc\xff\xff\xff\xff\xff\xef?\xc4\xfcC\xc9\xe0j\x98\xbc\xfc\xff\xff\xff\xff\xff\xef?\xc4\xfcC\xc9\xe0j\x98\xbc\xfc\xff\xff\xff\xff\xff\xef?\xc4\xfcC\xc9\xe0j\x98\xbc\xfc\xff\xff\xff\xff\xff\xef?\xc4\xfcC\xc9\xe0j\x98\xbc\xfc\xff\xff\xff\xff\xff\xef?\xc4\xfcC\xc9\xe0j\x98\xbc\xfc\xff\xff\xff\xff\xff\xef?\xc4\xfcC\xc9\xe0j\x98\xbc\xfc\xff\xff\xff\xff\xff\xef?\xc4\xfcC\xc9\xe0j\x98\xbc\xfc\xff\xff\xff\xff\xff\xef?\xc4\xfcC\xc9\xe0j\x98\xbc\xfc\xff\xff\xff\xff\xff\xef?\xc4\xfcC\xc9\xe0j\x98\xbc\xfc\xff\xff\xff\xff\xff\xef?\xc4\xfcC\xc9\xe0j\x98\xbc\xfc\xff\xff\xff\xff\xff\xef?\xc4\xfcC\xc9\xe0j\x98\xbc\xfc\xff\xff\xff\xff\xff\xef?\xc4\xfcC\xc9\xe0j\x98\xbc\xfc\xff\xff\xff\xff\xff\xef?\xc4\xfcC\xc9\xe0j\x98\xbc\xfc\xff\xff\xff\xff\xff\xef?\xc4\xfcC\xc9\xe0j\x98\xbc\xfc\xff\xff\xff\xff\xff\xef?\xc4\xfcC\xc9\xe0j\x98\xbc\xfc\xff\xff\xff\xff\xff\xef?\xc4\xfcC\xc9\xe0j\x98\xbc\xfc\xff\xff\xff\xff\xff\xef?\xc4\xfcC\xc9\xe0j\x98\xbc\xfc\xff\xff\xff\xff\xff\xef?\xc4\xfcC\xc9\xe0j\x98\xbc\xfc\xff\xff\xff\xff\xff\xef?\xc4\xfcC\xc9\xe0j\x98\xbc\xfc\xff\xff\xff\xff\xff\xef?\xc4\xfcC\xc9\xe0j\x98\xbc\xfc\xff\xff\xff\xff\xff\xef?\xc4\xfcC\xc9\xe0j\x98\xbc\xfc\xff\xff\xff\xff\xff\xef?\xc4\xfcC\xc9\xe0j\x98\xbc\xfc\xff\xff\xff\xff\xff\xef?\xc4\xfcC\xc9\xe0j\x98\xbc\xfc\xff\xff\xff\xff\xff\xef?\xc4\xfcC\xc9\xe0j\x98\xbc\xfc\xff\xff\xff\xff\xff\xef?\xc4\xfcC\xc9\xe0j\x98\xbc\xfc\xff\xff\xff\xff\xff\xef?\xc4\xfcC\xc9\xe0j\x98\xbc\xfc\xff\xff\xff\xff\xff\xef?\xc4\xfcC\xc9\xe0j\x98\xbc\xfc\xff\xff\xff\xff\xff\xef?\xc4\xfcC\xc9\xe0j\x98\xbc\xfc\xff\xff\xff\xff\xff\xef?\xc4\xfcC\xc9\xe0j\x98\xbc\xfc\xff\xff\xff\xff\xff\xef?\xc4\xfcC\xc9\xe0j\x98\xbc\xfc\xff\xff\xff\xff\xff\xef?\xc4\xfcC\xc9\xe0j\x98\xbc\xfc\xff\xff\xff\xff\xff\xef?\xc4\xfcC\xc9\xe0j\x98\xbc\xfc\xff\xff\xff\xff\xff\xef?\xc4\xfcC\xc9\xe0j\x98\xbc\xfc\xff\xff\xff\xff\xff\xef?\xc4\xfcC\xc9\xe0j\x98\xbc\xfc\xff\xff\xff\xff\xff\xef?\xc4\xfcC\xc9\xe0j\x98\xbc\xfc\xff\xff\xff\xff\xff\xef?\xc4\xfcC\xc9\xe0j\x98\xbc\xfc\xff\xff\xff\xff\xff\xef?\xc4\xfcC\xc9\xe0j\x98\xbc\xfc\xff\xff\xff\xff\xff\xef?\xc4\xfcC\xc9\xe0j\x98\xbc\xfc\xff\xff\xff\xff\xff\xef?\xc4\xfcC\xc9\xe0j\x98\xbc\xfc\xff\xff\xff\xff\xff\xef?\xc4\xfcC\xc9\xe0j\x98\xbc\xfc\xff\xff\xff\xff\xff\xef?\xc4\xfcC\xc9\xe0j\x98\xbc\xfc\xff\xff\xff\xff\xff\xef?\xc4\xfcC\xc9\xe0j\x98\xbc\xfc\xff\xff\xff\xff\xff\xef?\xc4\xfcC\xc9\xe0j\x98\xbc\xfc\xff\xff\xff\xff\xff\xef?\xc4\xfcC\xc9\xe0j\x98\xbc\xfc\xff\xff\xff\xff\xff\xef?\xc4\xfcC\xc9\xe0j\x98\xbc\xfc\xff\xff\xff\xff\xff\xef?'
p185
tp186
bag2
(g3
(I0
tp187
g5
tp188
Rp189
(I1
(I2
I128
tp190
g12
I01
S'\xc4\xfcC\xc9\xe0j\x98\xbc\xfc\xff\xff\xff\xff\xff\xef?\xc4\xfcC\xc9\xe0j\x98\xbc\xfc\xff\xff\xff\xff\xff\xef?\xc4\xfcC\xc9\xe0j\x98\xbc\xfc\xff\xff\xff\xff\xff\xef?\xc4\xfcC\xc9\xe0j\x98\xbc\xfc\xff\xff\xff\xff\xff\xef?\xc4\xfcC\xc9\xe0j\x98\xbc\xfc\xff\xff\xff\xff\xff\xef?\xc4\xfcC\xc9\xe0j\x98\xbc\xfc\xff\xff\xff\xff\xff\xef?\xc4\xfcC\xc9\xe0j\x98\xbc\xfc\xff\xff\xff\xff\xff\xef?\xc4\xfcC\xc9\xe0j\x98\xbc\xfc\xff\xff\xff\xff\xff\xef?\xc4\xfcC\xc9\xe0j\x98\xbc\xfc\xff\xff\xff\xff\xff\xef?\xc4\xfcC\xc9\xe0j\x98\xbc\xfc\xff\xff\xff\xff\xff\xef?\xc4\xfcC\xc9\xe0j\x98\xbc\xfc\xff\xff\xff\xff\xff\xef?\xc4\xfcC\xc9\xe0j\x98\xbc\xfc\xff\xff\xff\xff\xff\xef?\xc4\xfcC\xc9\xe0j\x98\xbc\xfc\xff\xff\xff\xff\xff\xef?\xc4\xfcC\xc9\xe0j\x98\xbc\xfc\xff\xff\xff\xff\xff\xef?\xc4\xfcC\xc9\xe0j\x98\xbc\xfc\xff\xff\xff\xff\xff\xef?\xc4\xfcC\xc9\xe0j\x98\xbc\xfc\xff\xff\xff\xff\xff\xef?\xc4\xfcC\xc9\xe0j\x98\xbc\xfc\xff\xff\xff\xff\xff\xef?\xc4\xfcC\xc9\xe0j\x98\xbc\xfc\xff\xff\xff\xff\xff\xef?\xc4\xfcC\xc9\xe0j\x98\xbc\xfc\xff\xff\xff\xff\xff\xef?\xc4\xfcC\xc9\xe0j\x98\xbc\xfc\xff\xff\xff\xff\xff\xef?\xc4\xfcC\xc9\xe0j\x98\xbc\xfc\xff\xff\xff\xff\xff\xef?\xc4\xfcC\xc9\xe0j\x98\xbc\xfc\xff\xff\xff\xff\xff\xef?\xc4\xfcC\xc9\xe0j\x98\xbc\xfc\xff\xff\xff\xff\xff\xef?\xc4\xfcC\xc9\xe0j\x98\xbc\xfc\xff\xff\xff\xff\xff\xef?\xc4\xfcC\xc9\xe0j\x98\xbc\xfc\xff\xff\xff\xff\xff\xef?\xc4\xfcC\xc9\xe0j\x98\xbc\xfc\xff\xff\xff\xff\xff\xef?\xc4\xfcC\xc9\xe0j\x98\xbc\xfc\xff\xff\xff\xff\xff\xef?\xc4\xfcC\xc9\xe0j\x98\xbc\xfc\xff\xff\xff\xff\xff\xef?\xc4\xfcC\xc9\xe0j\x98\xbc\xfc\xff\xff\xff\xff\xff\xef?\xc4\xfcC\xc9\xe0j\x98\xbc\xfc\xff\xff\xff\xff\xff\xef?\xc4\xfcC\xc9\xe0j\x98\xbc\xfc\xff\xff\xff\xff\xff\xef?\xc4\xfcC\xc9\xe0j\x98\xbc\xfc\xff\xff\xff\xff\xff\xef?\xc4\xfcC\xc9\xe0j\x98\xbc\xfc\xff\xff\xff\xff\xff\xef?\xc4\xfcC\xc9\xe0j\x98\xbc\xfc\xff\xff\xff\xff\xff\xef?\xc4\xfcC\xc9\xe0j\x98\xbc\xfc\xff\xff\xff\xff\xff\xef?\xc4\xfcC\xc9\xe0j\x98\xbc\xfc\xff\xff\xff\xff\xff\xef?\xc4\xfcC\xc9\xe0j\x98\xbc\xfc\xff\xff\xff\xff\xff\xef?\xc4\xfcC\xc9\xe0j\x98\xbc\xfc\xff\xff\xff\xff\xff\xef?\xc4\xfcC\xc9\xe0j\x98\xbc\xfc\xff\xff\xff\xff\xff\xef?\xc4\xfcC\xc9\xe0j\x98\xbc\xfc\xff\xff\xff\xff\xff\xef?\xc4\xfcC\xc9\xe0j\x98\xbc\xfc\xff\xff\xff\xff\xff\xef?\xc4\xfcC\xc9\xe0j\x98\xbc\xfc\xff\xff\xff\xff\xff\xef?\xc4\xfcC\xc9\xe0j\x98\xbc\xfc\xff\xff\xff\xff\xff\xef?\xc4\xfcC\xc9\xe0j\x98\xbc\xfc\xff\xff\xff\xff\xff\xef?\xc4\xfcC\xc9\xe0j\x98\xbc\xfc\xff\xff\xff\xff\xff\xef?\xc4\xfcC\xc9\xe0j\x98\xbc\xfc\xff\xff\xff\xff\xff\xef?\xc4\xfcC\xc9\xe0j\x98\xbc\xfc\xff\xff\xff\xff\xff\xef?\xc4\xfcC\xc9\xe0j\x98\xbc\xfc\xff\xff\xff\xff\xff\xef?\xc4\xfcC\xc9\xe0j\x98\xbc\xfc\xff\xff\xff\xff\xff\xef?\xc4\xfcC\xc9\xe0j\x98\xbc\xfc\xff\xff\xff\xff\xff\xef?\xc4\xfcC\xc9\xe0j\x98\xbc\xfc\xff\xff\xff\xff\xff\xef?\xc4\xfcC\xc9\xe0j\x98\xbc\xfc\xff\xff\xff\xff\xff\xef?\xc4\xfcC\xc9\xe0j\x98\xbc\xfc\xff\xff\xff\xff\xff\xef?\xc4\xfcC\xc9\xe0j\x98\xbc\xfc\xff\xff\xff\xff\xff\xef?\xc4\xfcC\xc9\xe0j\x98\xbc\xfc\xff\xff\xff\xff\xff\xef?\xc4\xfcC\xc9\xe0j\x98\xbc\xfc\xff\xff\xff\xff\xff\xef?\xc4\xfcC\xc9\xe0j\x98\xbc\xfc\xff\xff\xff\xff\xff\xef?\xc4\xfcC\xc9\xe0j\x98\xbc\xfc\xff\xff\xff\xff\xff\xef?\xc4\xfcC\xc9\xe0j\x98\xbc\xfc\xff\xff\xff\xff\xff\xef?\xc4\xfcC\xc9\xe0j\x98\xbc\xfc\xff\xff\xff\xff\xff\xef?\xc4\xfcC\xc9\xe0j\x98\xbc\xfc\xff\xff\xff\xff\xff\xef?\xc4\xfcC\xc9\xe0j\x98\xbc\xfc\xff\xff\xff\xff\xff\xef?\xc4\xfcC\xc9\xe0j\x98\xbc\xfc\xff\xff\xff\xff\xff\xef?\xc4\xfcC\xc9\xe0j\x98\xbc\xfc\xff\xff\xff\xff\xff\xef?\xc4\xfcC\xc9\xe0j\x98\xbc\xfc\xff\xff\xff\xff\xff\xef?\xc4\xfcC\xc9\xe0j\x98\xbc\xfc\xff\xff\xff\xff\xff\xef?\xc4\xfcC\xc9\xe0j\x98\xbc\xfc\xff\xff\xff\xff\xff\xef?\xc4\xfcC\xc9\xe0j\x98\xbc\xfc\xff\xff\xff\xff\xff\xef?\xc4\xfcC\xc9\xe0j\x98\xbc\xfc\xff\xff\xff\xff\xff\xef?\xc4\xfcC\xc9\xe0j\x98\xbc\xfc\xff\xff\xff\xff\xff\xef?\xc4\xfcC\xc9\xe0j\x98\xbc\xfc\xff\xff\xff\xff\xff\xef?\xc4\xfcC\xc9\xe0j\x98\xbc\xfc\xff\xff\xff\xff\xff\xef?\xc4\xfcC\xc9\xe0j\x98\xbc\xfc\xff\xff\xff\xff\xff\xef?\xc4\xfcC\xc9\xe0j\x98\xbc\xfc\xff\xff\xff\xff\xff\xef?\xc4\xfcC\xc9\xe0j\x98\xbc\xfc\xff\xff\xff\xff\xff\xef?\xc4\xfcC\xc9\xe0j\x98\xbc\xfc\xff\xff\xff\xff\xff\xef?\xc4\xfcC\xc9\xe0j\x98\xbc\xfc\xff\xff\xff\xff\xff\xef?\xc4\xfcC\xc9\xe0j\x98\xbc\xfc\xff\xff\xff\xff\xff\xef?\xc4\xfcC\xc9\xe0j\x98\xbc\xfc\xff\xff\xff\xff\xff\xef?\xc4\xfcC\xc9\xe0j\x98\xbc\xfc\xff\xff\xff\xff\xff\xef?\xc4\xfcC\xc9\xe0j\x98\xbc\xfc\xff\xff\xff\xff\xff\xef?\xc4\xfcC\xc9\xe0j\x98\xbc\xfc\xff\xff\xff\xff\xff\xef?\xc4\xfcC\xc9\xe0j\x98\xbc\xfc\xff\xff\xff\xff\xff\xef?\xc4\xfcC\xc9\xe0j\x98\xbc\xfc\xff\xff\xff\xff\xff\xef?\xc4\xfcC\xc9\xe0j\x98\xbc\xfc\xff\xff\xff\xff\xff\xef?\xc4\xfcC\xc9\xe0j\x98\xbc\xfc\xff\xff\xff\xff\xff\xef?\xc4\xfcC\xc9\xe0j\x98\xbc\xfc\xff\xff\xff\xff\xff\xef?\xc4\xfcC\xc9\xe0j\x98\xbc\xfc\xff\xff\xff\xff\xff\xef?\xc4\xfcC\xc9\xe0j\x98\xbc\xfc\xff\xff\xff\xff\xff\xef?\xc4\xfcC\xc9\xe0j\x98\xbc\xfc\xff\xff\xff\xff\xff\xef?\xc4\xfcC\xc9\xe0j\x98\xbc\xfc\xff\xff\xff\xff\xff\xef?\xc4\xfcC\xc9\xe0j\x98\xbc\xfc\xff\xff\xff\xff\xff\xef?\xc4\xfcC\xc9\xe0j\x98\xbc\xfc\xff\xff\xff\xff\xff\xef?\xc4\xfcC\xc9\xe0j\x98\xbc\xfc\xff\xff\xff\xff\xff\xef?\xc4\xfcC\xc9\xe0j\x98\xbc\xfc\xff\xff\xff\xff\xff\xef?\xc4\xfcC\xc9\xe0j\x98\xbc\xfc\xff\xff\xff\xff\xff\xef?\xc4\xfcC\xc9\xe0j\x98\xbc\xfc\xff\xff\xff\xff\xff\xef?\xc4\xfcC\xc9\xe0j\x98\xbc\xfc\xff\xff\xff\xff\xff\xef?\xc4\xfcC\xc9\xe0j\x98\xbc\xfc\xff\xff\xff\xff\xff\xef?\xc4\xfcC\xc9\xe0j\x98\xbc\xfc\xff\xff\xff\xff\xff\xef?\xc4\xfcC\xc9\xe0j\x98\xbc\xfc\xff\xff\xff\xff\xff\xef?\xc4\xfcC\xc9\xe0j\x98\xbc\xfc\xff\xff\xff\xff\xff\xef?\xc4\xfcC\xc9\xe0j\x98\xbc\xfc\xff\xff\xff\xff\xff\xef?\xc4\xfcC\xc9\xe0j\x98\xbc\xfc\xff\xff\xff\xff\xff\xef?\xc4\xfcC\xc9\xe0j\x98\xbc\xfc\xff\xff\xff\xff\xff\xef?\xc4\xfcC\xc9\xe0j\x98\xbc\xfc\xff\xff\xff\xff\xff\xef?\xc4\xfcC\xc9\xe0j\x98\xbc\xfc\xff\xff\xff\xff\xff\xef?\xc4\xfcC\xc9\xe0j\x98\xbc\xfc\xff\xff\xff\xff\xff\xef?\xc4\xfcC\xc9\xe0j\x98\xbc\xfc\xff\xff\xff\xff\xff\xef?\xc4\xfcC\xc9\xe0j\x98\xbc\xfc\xff\xff\xff\xff\xff\xef?\xc4\xfcC\xc9\xe0j\x98\xbc\xfc\xff\xff\xff\xff\xff\xef?\xc4\xfcC\xc9\xe0j\x98\xbc\xfc\xff\xff\xff\xff\xff\xef?\xc4\xfcC\xc9\xe0j\x98\xbc\xfc\xff\xff\xff\xff\xff\xef?\xc4\xfcC\xc9\xe0j\x98\xbc\xfc\xff\xff\xff\xff\xff\xef?\xc4\xfcC\xc9\xe0j\x98\xbc\xfc\xff\xff\xff\xff\xff\xef?\xc4\xfcC\xc9\xe0j\x98\xbc\xfc\xff\xff\xff\xff\xff\xef?\xc4\xfcC\xc9\xe0j\x98\xbc\xfc\xff\xff\xff\xff\xff\xef?\xc4\xfcC\xc9\xe0j\x98\xbc\xfc\xff\xff\xff\xff\xff\xef?\xc4\xfcC\xc9\xe0j\x98\xbc\xfc\xff\xff\xff\xff\xff\xef?\xc4\xfcC\xc9\xe0j\x98\xbc\xfc\xff\xff\xff\xff\xff\xef?\xc4\xfcC\xc9\xe0j\x98\xbc\xfc\xff\xff\xff\xff\xff\xef?\xc4\xfcC\xc9\xe0j\x98\xbc\xfc\xff\xff\xff\xff\xff\xef?\xc4\xfcC\xc9\xe0j\x98\xbc\xfc\xff\xff\xff\xff\xff\xef?\xc4\xfcC\xc9\xe0j\x98\xbc\xfc\xff\xff\xff\xff\xff\xef?\xc4\xfcC\xc9\xe0j\x98\xbc\xfc\xff\xff\xff\xff\xff\xef?\xc4\xfcC\xc9\xe0j\x98\xbc\xfc\xff\xff\xff\xff\xff\xef?\xc4\xfcC\xc9\xe0j\x98\xbc\xfc\xff\xff\xff\xff\xff\xef?\xc4\xfcC\xc9\xe0j\x98\xbc\xfc\xff\xff\xff\xff\xff\xef?'
p191
tp192
bag2
(g3
(I0
tp193
g5
tp194
Rp195
(I1
(I2
I247
tp196
g12
I01
S'\xc4\xfcC\xc9\xe0j\x98\xbc\xfc\xff\xff\xff\xff\xff\xef?\xc4\xfcC\xc9\xe0j\x98\xbc\xfc\xff\xff\xff\xff\xff\xef?\xc4\xfcC\xc9\xe0j\x98\xbc\xfc\xff\xff\xff\xff\xff\xef?\xc4\xfcC\xc9\xe0j\x98\xbc\xfc\xff\xff\xff\xff\xff\xef?\xc4\xfcC\xc9\xe0j\x98\xbc\xfc\xff\xff\xff\xff\xff\xef?\xc4\xfcC\xc9\xe0j\x98\xbc\xfc\xff\xff\xff\xff\xff\xef?\xc4\xfcC\xc9\xe0j\x98\xbc\xfc\xff\xff\xff\xff\xff\xef?\xc4\xfcC\xc9\xe0j\x98\xbc\xfc\xff\xff\xff\xff\xff\xef?\xc4\xfcC\xc9\xe0j\x98\xbc\xfc\xff\xff\xff\xff\xff\xef?\xc4\xfcC\xc9\xe0j\x98\xbc\xfc\xff\xff\xff\xff\xff\xef?\xc4\xfcC\xc9\xe0j\x98\xbc\xfc\xff\xff\xff\xff\xff\xef?\xc4\xfcC\xc9\xe0j\x98\xbc\xfc\xff\xff\xff\xff\xff\xef?\xc4\xfcC\xc9\xe0j\x98\xbc\xfc\xff\xff\xff\xff\xff\xef?\xc4\xfcC\xc9\xe0j\x98\xbc\xfc\xff\xff\xff\xff\xff\xef?\xc4\xfcC\xc9\xe0j\x98\xbc\xfc\xff\xff\xff\xff\xff\xef?\xc4\xfcC\xc9\xe0j\x98\xbc\xfc\xff\xff\xff\xff\xff\xef?\xc4\xfcC\xc9\xe0j\x98\xbc\xfc\xff\xff\xff\xff\xff\xef?\xc4\xfcC\xc9\xe0j\x98\xbc\xfc\xff\xff\xff\xff\xff\xef?\xc4\xfcC\xc9\xe0j\x98\xbc\xfc\xff\xff\xff\xff\xff\xef?\xc4\xfcC\xc9\xe0j\x98\xbc\xfc\xff\xff\xff\xff\xff\xef?\xc4\xfcC\xc9\xe0j\x98\xbc\xfc\xff\xff\xff\xff\xff\xef?\xc4\xfcC\xc9\xe0j\x98\xbc\xfc\xff\xff\xff\xff\xff\xef?\xc4\xfcC\xc9\xe0j\x98\xbc\xfc\xff\xff\xff\xff\xff\xef?\xc4\xfcC\xc9\xe0j\x98\xbc\xfc\xff\xff\xff\xff\xff\xef?\xc4\xfcC\xc9\xe0j\x98\xbc\xfc\xff\xff\xff\xff\xff\xef?\xc4\xfcC\xc9\xe0j\x98\xbc\xfc\xff\xff\xff\xff\xff\xef?\xc4\xfcC\xc9\xe0j\x98\xbc\xfc\xff\xff\xff\xff\xff\xef?\xc4\xfcC\xc9\xe0j\x98\xbc\xfc\xff\xff\xff\xff\xff\xef?\xc4\xfcC\xc9\xe0j\x98\xbc\xfc\xff\xff\xff\xff\xff\xef?\xc4\xfcC\xc9\xe0j\x98\xbc\xfc\xff\xff\xff\xff\xff\xef?\xc4\xfcC\xc9\xe0j\x98\xbc\xfc\xff\xff\xff\xff\xff\xef?\xc4\xfcC\xc9\xe0j\x98\xbc\xfc\xff\xff\xff\xff\xff\xef?\xc4\xfcC\xc9\xe0j\x98\xbc\xfc\xff\xff\xff\xff\xff\xef?\xc4\xfcC\xc9\xe0j\x98\xbc\xfc\xff\xff\xff\xff\xff\xef?\xc4\xfcC\xc9\xe0j\x98\xbc\xfc\xff\xff\xff\xff\xff\xef?\xc4\xfcC\xc9\xe0j\x98\xbc\xfc\xff\xff\xff\xff\xff\xef?\xc4\xfcC\xc9\xe0j\x98\xbc\xfc\xff\xff\xff\xff\xff\xef?\xc4\xfcC\xc9\xe0j\x98\xbc\xfc\xff\xff\xff\xff\xff\xef?\xc4\xfcC\xc9\xe0j\x98\xbc\xfc\xff\xff\xff\xff\xff\xef?\xc4\xfcC\xc9\xe0j\x98\xbc\xfc\xff\xff\xff\xff\xff\xef?\xc4\xfcC\xc9\xe0j\x98\xbc\xfc\xff\xff\xff\xff\xff\xef?\xc4\xfcC\xc9\xe0j\x98\xbc\xfc\xff\xff\xff\xff\xff\xef?\xc4\xfcC\xc9\xe0j\x98\xbc\xfc\xff\xff\xff\xff\xff\xef?\xc4\xfcC\xc9\xe0j\x98\xbc\xfc\xff\xff\xff\xff\xff\xef?\xc4\xfcC\xc9\xe0j\x98\xbc\xfc\xff\xff\xff\xff\xff\xef?\xc4\xfcC\xc9\xe0j\x98\xbc\xfc\xff\xff\xff\xff\xff\xef?\xc4\xfcC\xc9\xe0j\x98\xbc\xfc\xff\xff\xff\xff\xff\xef?\xc4\xfcC\xc9\xe0j\x98\xbc\xfc\xff\xff\xff\xff\xff\xef?\xc4\xfcC\xc9\xe0j\x98\xbc\xfc\xff\xff\xff\xff\xff\xef?\xc4\xfcC\xc9\xe0j\x98\xbc\xfc\xff\xff\xff\xff\xff\xef?\xc4\xfcC\xc9\xe0j\x98\xbc\xfc\xff\xff\xff\xff\xff\xef?\xc4\xfcC\xc9\xe0j\x98\xbc\xfc\xff\xff\xff\xff\xff\xef?\xc4\xfcC\xc9\xe0j\x98\xbc\xfc\xff\xff\xff\xff\xff\xef?\xc4\xfcC\xc9\xe0j\x98\xbc\xfc\xff\xff\xff\xff\xff\xef?\xc4\xfcC\xc9\xe0j\x98\xbc\xfc\xff\xff\xff\xff\xff\xef?\xc4\xfcC\xc9\xe0j\x98\xbc\xfc\xff\xff\xff\xff\xff\xef?\xc4\xfcC\xc9\xe0j\x98\xbc\xfc\xff\xff\xff\xff\xff\xef?\xc4\xfcC\xc9\xe0j\x98\xbc\xfc\xff\xff\xff\xff\xff\xef?\xc4\xfcC\xc9\xe0j\x98\xbc\xfc\xff\xff\xff\xff\xff\xef?\xc4\xfcC\xc9\xe0j\x98\xbc\xfc\xff\xff\xff\xff\xff\xef?\xc4\xfcC\xc9\xe0j\x98\xbc\xfc\xff\xff\xff\xff\xff\xef?\xc4\xfcC\xc9\xe0j\x98\xbc\xfc\xff\xff\xff\xff\xff\xef?\xc4\xfcC\xc9\xe0j\x98\xbc\xfc\xff\xff\xff\xff\xff\xef?\xc4\xfcC\xc9\xe0j\x98\xbc\xfc\xff\xff\xff\xff\xff\xef?\xc4\xfcC\xc9\xe0j\x98\xbc\xfc\xff\xff\xff\xff\xff\xef?\xc4\xfcC\xc9\xe0j\x98\xbc\xfc\xff\xff\xff\xff\xff\xef?\xc4\xfcC\xc9\xe0j\x98\xbc\xfc\xff\xff\xff\xff\xff\xef?\xc4\xfcC\xc9\xe0j\x98\xbc\xfc\xff\xff\xff\xff\xff\xef?\xc4\xfcC\xc9\xe0j\x98\xbc\xfc\xff\xff\xff\xff\xff\xef?\xc4\xfcC\xc9\xe0j\x98\xbc\xfc\xff\xff\xff\xff\xff\xef?\xc4\xfcC\xc9\xe0j\x98\xbc\xfc\xff\xff\xff\xff\xff\xef?\xc4\xfcC\xc9\xe0j\x98\xbc\xfc\xff\xff\xff\xff\xff\xef?\xc4\xfcC\xc9\xe0j\x98\xbc\xfc\xff\xff\xff\xff\xff\xef?\xc4\xfcC\xc9\xe0j\x98\xbc\xfc\xff\xff\xff\xff\xff\xef?\xc4\xfcC\xc9\xe0j\x98\xbc\xfc\xff\xff\xff\xff\xff\xef?\xc4\xfcC\xc9\xe0j\x98\xbc\xfc\xff\xff\xff\xff\xff\xef?\xc4\xfcC\xc9\xe0j\x98\xbc\xfc\xff\xff\xff\xff\xff\xef?\xc4\xfcC\xc9\xe0j\x98\xbc\xfc\xff\xff\xff\xff\xff\xef?\xc4\xfcC\xc9\xe0j\x98\xbc\xfc\xff\xff\xff\xff\xff\xef?\xc4\xfcC\xc9\xe0j\x98\xbc\xfc\xff\xff\xff\xff\xff\xef?\xc4\xfcC\xc9\xe0j\x98\xbc\xfc\xff\xff\xff\xff\xff\xef?\xc4\xfcC\xc9\xe0j\x98\xbc\xfc\xff\xff\xff\xff\xff\xef?\xc4\xfcC\xc9\xe0j\x98\xbc\xfc\xff\xff\xff\xff\xff\xef?\xc4\xfcC\xc9\xe0j\x98\xbc\xfc\xff\xff\xff\xff\xff\xef?\xc4\xfcC\xc9\xe0j\x98\xbc\xfc\xff\xff\xff\xff\xff\xef?\xc4\xfcC\xc9\xe0j\x98\xbc\xfc\xff\xff\xff\xff\xff\xef?\xc4\xfcC\xc9\xe0j\x98\xbc\xfc\xff\xff\xff\xff\xff\xef?\xc4\xfcC\xc9\xe0j\x98\xbc\xfc\xff\xff\xff\xff\xff\xef?\xc4\xfcC\xc9\xe0j\x98\xbc\xfc\xff\xff\xff\xff\xff\xef?\xc4\xfcC\xc9\xe0j\x98\xbc\xfc\xff\xff\xff\xff\xff\xef?\xc4\xfcC\xc9\xe0j\x98\xbc\xfc\xff\xff\xff\xff\xff\xef?\xc4\xfcC\xc9\xe0j\x98\xbc\xfc\xff\xff\xff\xff\xff\xef?\xc4\xfcC\xc9\xe0j\x98\xbc\xfc\xff\xff\xff\xff\xff\xef?\xc4\xfcC\xc9\xe0j\x98\xbc\xfc\xff\xff\xff\xff\xff\xef?\xc4\xfcC\xc9\xe0j\x98\xbc\xfc\xff\xff\xff\xff\xff\xef?\xc4\xfcC\xc9\xe0j\x98\xbc\xfc\xff\xff\xff\xff\xff\xef?\xc4\xfcC\xc9\xe0j\x98\xbc\xfc\xff\xff\xff\xff\xff\xef?\xc4\xfcC\xc9\xe0j\x98\xbc\xfc\xff\xff\xff\xff\xff\xef?\xc4\xfcC\xc9\xe0j\x98\xbc\xfc\xff\xff\xff\xff\xff\xef?\xc4\xfcC\xc9\xe0j\x98\xbc\xfc\xff\xff\xff\xff\xff\xef?\xc4\xfcC\xc9\xe0j\x98\xbc\xfc\xff\xff\xff\xff\xff\xef?\xc4\xfcC\xc9\xe0j\x98\xbc\xfc\xff\xff\xff\xff\xff\xef?\xc4\xfcC\xc9\xe0j\x98\xbc\xfc\xff\xff\xff\xff\xff\xef?\xc4\xfcC\xc9\xe0j\x98\xbc\xfc\xff\xff\xff\xff\xff\xef?\xc4\xfcC\xc9\xe0j\x98\xbc\xfc\xff\xff\xff\xff\xff\xef?\xc4\xfcC\xc9\xe0j\x98\xbc\xfc\xff\xff\xff\xff\xff\xef?\xc4\xfcC\xc9\xe0j\x98\xbc\xfc\xff\xff\xff\xff\xff\xef?\xc4\xfcC\xc9\xe0j\x98\xbc\xfc\xff\xff\xff\xff\xff\xef?\xc4\xfcC\xc9\xe0j\x98\xbc\xfc\xff\xff\xff\xff\xff\xef?\xc4\xfcC\xc9\xe0j\x98\xbc\xfc\xff\xff\xff\xff\xff\xef?\xc4\xfcC\xc9\xe0j\x98\xbc\xfc\xff\xff\xff\xff\xff\xef?\xc4\xfcC\xc9\xe0j\x98\xbc\xfc\xff\xff\xff\xff\xff\xef?\xc4\xfcC\xc9\xe0j\x98\xbc\xfc\xff\xff\xff\xff\xff\xef?\xc4\xfcC\xc9\xe0j\x98\xbc\xfc\xff\xff\xff\xff\xff\xef?\xc4\xfcC\xc9\xe0j\x98\xbc\xfc\xff\xff\xff\xff\xff\xef?\xc4\xfcC\xc9\xe0j\x98\xbc\xfc\xff\xff\xff\xff\xff\xef?\xc4\xfcC\xc9\xe0j\x98\xbc\xfc\xff\xff\xff\xff\xff\xef?\xc4\xfcC\xc9\xe0j\x98\xbc\xfc\xff\xff\xff\xff\xff\xef?\xc4\xfcC\xc9\xe0j\x98\xbc\xfc\xff\xff\xff\xff\xff\xef?\xc4\xfcC\xc9\xe0j\x98\xbc\xfc\xff\xff\xff\xff\xff\xef?\xc4\xfcC\xc9\xe0j\x98\xbc\xfc\xff\xff\xff\xff\xff\xef?\xc4\xfcC\xc9\xe0j\x98\xbc\xfc\xff\xff\xff\xff\xff\xef?\xc4\xfcC\xc9\xe0j\x98\xbc\xfc\xff\xff\xff\xff\xff\xef?\xc4\xfcC\xc9\xe0j\x98\xbc\xfc\xff\xff\xff\xff\xff\xef?\xc4\xfcC\xc9\xe0j\x98\xbc\xfc\xff\xff\xff\xff\xff\xef?\xc4\xfcC\xc9\xe0j\x98\xbc\xfc\xff\xff\xff\xff\xff\xef?\xc4\xfcC\xc9\xe0j\x98\xbc\xfc\xff\xff\xff\xff\xff\xef?\xc4\xfcC\xc9\xe0j\x98\xbc\xfc\xff\xff\xff\xff\xff\xef?\xc4\xfcC\xc9\xe0j\x98\xbc\xfc\xff\xff\xff\xff\xff\xef?\xc4\xfcC\xc9\xe0j\x98\xbc\xfc\xff\xff\xff\xff\xff\xef?\xc4\xfcC\xc9\xe0j\x98\xbc\xfc\xff\xff\xff\xff\xff\xef?\xc4\xfcC\xc9\xe0j\x98\xbc\xfc\xff\xff\xff\xff\xff\xef?\xc4\xfcC\xc9\xe0j\x98\xbc\xfc\xff\xff\xff\xff\xff\xef?\xc4\xfcC\xc9\xe0j\x98\xbc\xfc\xff\xff\xff\xff\xff\xef?\xc4\xfcC\xc9\xe0j\x98\xbc\xfc\xff\xff\xff\xff\xff\xef?\xc4\xfcC\xc9\xe0j\x98\xbc\xfc\xff\xff\xff\xff\xff\xef?\xc4\xfcC\xc9\xe0j\x98\xbc\xfc\xff\xff\xff\xff\xff\xef?\xc4\xfcC\xc9\xe0j\x98\xbc\xfc\xff\xff\xff\xff\xff\xef?\xc4\xfcC\xc9\xe0j\x98\xbc\xfc\xff\xff\xff\xff\xff\xef?\xc4\xfcC\xc9\xe0j\x98\xbc\xfc\xff\xff\xff\xff\xff\xef?\xc4\xfcC\xc9\xe0j\x98\xbc\xfc\xff\xff\xff\xff\xff\xef?\xc4\xfcC\xc9\xe0j\x98\xbc\xfc\xff\xff\xff\xff\xff\xef?\xc4\xfcC\xc9\xe0j\x98\xbc\xfc\xff\xff\xff\xff\xff\xef?\xc4\xfcC\xc9\xe0j\x98\xbc\xfc\xff\xff\xff\xff\xff\xef?\xc4\xfcC\xc9\xe0j\x98\xbc\xfc\xff\xff\xff\xff\xff\xef?\xc4\xfcC\xc9\xe0j\x98\xbc\xfc\xff\xff\xff\xff\xff\xef?\xc4\xfcC\xc9\xe0j\x98\xbc\xfc\xff\xff\xff\xff\xff\xef?\xc4\xfcC\xc9\xe0j\x98\xbc\xfc\xff\xff\xff\xff\xff\xef?\xc4\xfcC\xc9\xe0j\x98\xbc\xfc\xff\xff\xff\xff\xff\xef?\xc4\xfcC\xc9\xe0j\x98\xbc\xfc\xff\xff\xff\xff\xff\xef?\xc4\xfcC\xc9\xe0j\x98\xbc\xfc\xff\xff\xff\xff\xff\xef?\xc4\xfcC\xc9\xe0j\x98\xbc\xfc\xff\xff\xff\xff\xff\xef?\xc4\xfcC\xc9\xe0j\x98\xbc\xfc\xff\xff\xff\xff\xff\xef?\xc4\xfcC\xc9\xe0j\x98\xbc\xfc\xff\xff\xff\xff\xff\xef?\xc4\xfcC\xc9\xe0j\x98\xbc\xfc\xff\xff\xff\xff\xff\xef?\xc4\xfcC\xc9\xe0j\x98\xbc\xfc\xff\xff\xff\xff\xff\xef?\xc4\xfcC\xc9\xe0j\x98\xbc\xfc\xff\xff\xff\xff\xff\xef?\xc4\xfcC\xc9\xe0j\x98\xbc\xfc\xff\xff\xff\xff\xff\xef?\xc4\xfcC\xc9\xe0j\x98\xbc\xfc\xff\xff\xff\xff\xff\xef?\xc4\xfcC\xc9\xe0j\x98\xbc\xfc\xff\xff\xff\xff\xff\xef?\xc4\xfcC\xc9\xe0j\x98\xbc\xfc\xff\xff\xff\xff\xff\xef?\xc4\xfcC\xc9\xe0j\x98\xbc\xfc\xff\xff\xff\xff\xff\xef?\xc4\xfcC\xc9\xe0j\x98\xbc\xfc\xff\xff\xff\xff\xff\xef?\xc4\xfcC\xc9\xe0j\x98\xbc\xfc\xff\xff\xff\xff\xff\xef?\xc4\xfcC\xc9\xe0j\x98\xbc\xfc\xff\xff\xff\xff\xff\xef?\xc4\xfcC\xc9\xe0j\x98\xbc\xfc\xff\xff\xff\xff\xff\xef?\xc4\xfcC\xc9\xe0j\x98\xbc\xfc\xff\xff\xff\xff\xff\xef?\xc4\xfcC\xc9\xe0j\x98\xbc\xfc\xff\xff\xff\xff\xff\xef?\xc4\xfcC\xc9\xe0j\x98\xbc\xfc\xff\xff\xff\xff\xff\xef?\xc4\xfcC\xc9\xe0j\x98\xbc\xfc\xff\xff\xff\xff\xff\xef?\xc4\xfcC\xc9\xe0j\x98\xbc\xfc\xff\xff\xff\xff\xff\xef?\xc4\xfcC\xc9\xe0j\x98\xbc\xfc\xff\xff\xff\xff\xff\xef?\xc4\xfcC\xc9\xe0j\x98\xbc\xfc\xff\xff\xff\xff\xff\xef?\xc4\xfcC\xc9\xe0j\x98\xbc\xfc\xff\xff\xff\xff\xff\xef?\xc4\xfcC\xc9\xe0j\x98\xbc\xfc\xff\xff\xff\xff\xff\xef?\xc4\xfcC\xc9\xe0j\x98\xbc\xfc\xff\xff\xff\xff\xff\xef?\xc4\xfcC\xc9\xe0j\x98\xbc\xfc\xff\xff\xff\xff\xff\xef?\xc4\xfcC\xc9\xe0j\x98\xbc\xfc\xff\xff\xff\xff\xff\xef?\xc4\xfcC\xc9\xe0j\x98\xbc\xfc\xff\xff\xff\xff\xff\xef?\xc4\xfcC\xc9\xe0j\x98\xbc\xfc\xff\xff\xff\xff\xff\xef?\xc4\xfcC\xc9\xe0j\x98\xbc\xfc\xff\xff\xff\xff\xff\xef?\xc4\xfcC\xc9\xe0j\x98\xbc\xfc\xff\xff\xff\xff\xff\xef?\xc4\xfcC\xc9\xe0j\x98\xbc\xfc\xff\xff\xff\xff\xff\xef?\xc4\xfcC\xc9\xe0j\x98\xbc\xfc\xff\xff\xff\xff\xff\xef?\xc4\xfcC\xc9\xe0j\x98\xbc\xfc\xff\xff\xff\xff\xff\xef?\xc4\xfcC\xc9\xe0j\x98\xbc\xfc\xff\xff\xff\xff\xff\xef?\xc4\xfcC\xc9\xe0j\x98\xbc\xfc\xff\xff\xff\xff\xff\xef?\xc4\xfcC\xc9\xe0j\x98\xbc\xfc\xff\xff\xff\xff\xff\xef?\xc4\xfcC\xc9\xe0j\x98\xbc\xfc\xff\xff\xff\xff\xff\xef?\xc4\xfcC\xc9\xe0j\x98\xbc\xfc\xff\xff\xff\xff\xff\xef?\xc4\xfcC\xc9\xe0j\x98\xbc\xfc\xff\xff\xff\xff\xff\xef?\xc4\xfcC\xc9\xe0j\x98\xbc\xfc\xff\xff\xff\xff\xff\xef?\xc4\xfcC\xc9\xe0j\x98\xbc\xfc\xff\xff\xff\xff\xff\xef?\xc4\xfcC\xc9\xe0j\x98\xbc\xfc\xff\xff\xff\xff\xff\xef?\xc4\xfcC\xc9\xe0j\x98\xbc\xfc\xff\xff\xff\xff\xff\xef?\xc4\xfcC\xc9\xe0j\x98\xbc\xfc\xff\xff\xff\xff\xff\xef?\xc4\xfcC\xc9\xe0j\x98\xbc\xfc\xff\xff\xff\xff\xff\xef?\xc4\xfcC\xc9\xe0j\x98\xbc\xfc\xff\xff\xff\xff\xff\xef?\xc4\xfcC\xc9\xe0j\x98\xbc\xfc\xff\xff\xff\xff\xff\xef?\xc4\xfcC\xc9\xe0j\x98\xbc\xfc\xff\xff\xff\xff\xff\xef?\xc4\xfcC\xc9\xe0j\x98\xbc\xfc\xff\xff\xff\xff\xff\xef?\xc4\xfcC\xc9\xe0j\x98\xbc\xfc\xff\xff\xff\xff\xff\xef?\xc4\xfcC\xc9\xe0j\x98\xbc\xfc\xff\xff\xff\xff\xff\xef?\xc4\xfcC\xc9\xe0j\x98\xbc\xfc\xff\xff\xff\xff\xff\xef?\xc4\xfcC\xc9\xe0j\x98\xbc\xfc\xff\xff\xff\xff\xff\xef?\xc4\xfcC\xc9\xe0j\x98\xbc\xfc\xff\xff\xff\xff\xff\xef?\xc4\xfcC\xc9\xe0j\x98\xbc\xfc\xff\xff\xff\xff\xff\xef?\xc4\xfcC\xc9\xe0j\x98\xbc\xfc\xff\xff\xff\xff\xff\xef?\xc4\xfcC\xc9\xe0j\x98\xbc\xfc\xff\xff\xff\xff\xff\xef?\xc4\xfcC\xc9\xe0j\x98\xbc\xfc\xff\xff\xff\xff\xff\xef?\xc4\xfcC\xc9\xe0j\x98\xbc\xfc\xff\xff\xff\xff\xff\xef?\xc4\xfcC\xc9\xe0j\x98\xbc\xfc\xff\xff\xff\xff\xff\xef?\xc4\xfcC\xc9\xe0j\x98\xbc\xfc\xff\xff\xff\xff\xff\xef?\xc4\xfcC\xc9\xe0j\x98\xbc\xfc\xff\xff\xff\xff\xff\xef?\xc4\xfcC\xc9\xe0j\x98\xbc\xfc\xff\xff\xff\xff\xff\xef?\xc4\xfcC\xc9\xe0j\x98\xbc\xfc\xff\xff\xff\xff\xff\xef?\xc4\xfcC\xc9\xe0j\x98\xbc\xfc\xff\xff\xff\xff\xff\xef?\xc4\xfcC\xc9\xe0j\x98\xbc\xfc\xff\xff\xff\xff\xff\xef?\xc4\xfcC\xc9\xe0j\x98\xbc\xfc\xff\xff\xff\xff\xff\xef?\xc4\xfcC\xc9\xe0j\x98\xbc\xfc\xff\xff\xff\xff\xff\xef?\xc4\xfcC\xc9\xe0j\x98\xbc\xfc\xff\xff\xff\xff\xff\xef?\xc4\xfcC\xc9\xe0j\x98\xbc\xfc\xff\xff\xff\xff\xff\xef?\xc4\xfcC\xc9\xe0j\x98\xbc\xfc\xff\xff\xff\xff\xff\xef?\xc4\xfcC\xc9\xe0j\x98\xbc\xfc\xff\xff\xff\xff\xff\xef?\xc4\xfcC\xc9\xe0j\x98\xbc\xfc\xff\xff\xff\xff\xff\xef?\xc4\xfcC\xc9\xe0j\x98\xbc\xfc\xff\xff\xff\xff\xff\xef?\xc4\xfcC\xc9\xe0j\x98\xbc\xfc\xff\xff\xff\xff\xff\xef?\xc4\xfcC\xc9\xe0j\x98\xbc\xfc\xff\xff\xff\xff\xff\xef?\xc4\xfcC\xc9\xe0j\x98\xbc\xfc\xff\xff\xff\xff\xff\xef?\xc4\xfcC\xc9\xe0j\x98\xbc\xfc\xff\xff\xff\xff\xff\xef?\xc4\xfcC\xc9\xe0j\x98\xbc\xfc\xff\xff\xff\xff\xff\xef?\xc4\xfcC\xc9\xe0j\x98\xbc\xfc\xff\xff\xff\xff\xff\xef?\xc4\xfcC\xc9\xe0j\x98\xbc\xfc\xff\xff\xff\xff\xff\xef?\xc4\xfcC\xc9\xe0j\x98\xbc\xfc\xff\xff\xff\xff\xff\xef?\xc4\xfcC\xc9\xe0j\x98\xbc\xfc\xff\xff\xff\xff\xff\xef?\xc4\xfcC\xc9\xe0j\x98\xbc\xfc\xff\xff\xff\xff\xff\xef?\xc4\xfcC\xc9\xe0j\x98\xbc\xfc\xff\xff\xff\xff\xff\xef?\xc4\xfcC\xc9\xe0j\x98\xbc\xfc\xff\xff\xff\xff\xff\xef?\xc4\xfcC\xc9\xe0j\x98\xbc\xfc\xff\xff\xff\xff\xff\xef?\xc4\xfcC\xc9\xe0j\x98\xbc\xfc\xff\xff\xff\xff\xff\xef?\xc4\xfcC\xc9\xe0j\x98\xbc\xfc\xff\xff\xff\xff\xff\xef?\xc4\xfcC\xc9\xe0j\x98\xbc\xfc\xff\xff\xff\xff\xff\xef?\xc4\xfcC\xc9\xe0j\x98\xbc\xfc\xff\xff\xff\xff\xff\xef?\xc4\xfcC\xc9\xe0j\x98\xbc\xfc\xff\xff\xff\xff\xff\xef?\xc4\xfcC\xc9\xe0j\x98\xbc\xfc\xff\xff\xff\xff\xff\xef?\xc4\xfcC\xc9\xe0j\x98\xbc\xfc\xff\xff\xff\xff\xff\xef?\xc4\xfcC\xc9\xe0j\x98\xbc\xfc\xff\xff\xff\xff\xff\xef?'
p197
tp198
bag2
(g3
(I0
tp199
g5
tp200
Rp201
(I1
(I2
I249
tp202
g12
I01
S'\xc4\xfcC\xc9\xe0j\x98\xbc\xfc\xff\xff\xff\xff\xff\xef?\xc4\xfcC\xc9\xe0j\x98\xbc\xfc\xff\xff\xff\xff\xff\xef?\xc4\xfcC\xc9\xe0j\x98\xbc\xfc\xff\xff\xff\xff\xff\xef?\xc4\xfcC\xc9\xe0j\x98\xbc\xfc\xff\xff\xff\xff\xff\xef?\xc4\xfcC\xc9\xe0j\x98\xbc\xfc\xff\xff\xff\xff\xff\xef?\xc4\xfcC\xc9\xe0j\x98\xbc\xfc\xff\xff\xff\xff\xff\xef?\xc4\xfcC\xc9\xe0j\x98\xbc\xfc\xff\xff\xff\xff\xff\xef?\xc4\xfcC\xc9\xe0j\x98\xbc\xfc\xff\xff\xff\xff\xff\xef?\xc4\xfcC\xc9\xe0j\x98\xbc\xfc\xff\xff\xff\xff\xff\xef?\xc4\xfcC\xc9\xe0j\x98\xbc\xfc\xff\xff\xff\xff\xff\xef?\xc4\xfcC\xc9\xe0j\x98\xbc\xfc\xff\xff\xff\xff\xff\xef?\xc4\xfcC\xc9\xe0j\x98\xbc\xfc\xff\xff\xff\xff\xff\xef?\xc4\xfcC\xc9\xe0j\x98\xbc\xfc\xff\xff\xff\xff\xff\xef?\xc4\xfcC\xc9\xe0j\x98\xbc\xfc\xff\xff\xff\xff\xff\xef?\xc4\xfcC\xc9\xe0j\x98\xbc\xfc\xff\xff\xff\xff\xff\xef?\xc4\xfcC\xc9\xe0j\x98\xbc\xfc\xff\xff\xff\xff\xff\xef?\xc4\xfcC\xc9\xe0j\x98\xbc\xfc\xff\xff\xff\xff\xff\xef?\xc4\xfcC\xc9\xe0j\x98\xbc\xfc\xff\xff\xff\xff\xff\xef?\xc4\xfcC\xc9\xe0j\x98\xbc\xfc\xff\xff\xff\xff\xff\xef?\xc4\xfcC\xc9\xe0j\x98\xbc\xfc\xff\xff\xff\xff\xff\xef?\xc4\xfcC\xc9\xe0j\x98\xbc\xfc\xff\xff\xff\xff\xff\xef?\xc4\xfcC\xc9\xe0j\x98\xbc\xfc\xff\xff\xff\xff\xff\xef?\xc4\xfcC\xc9\xe0j\x98\xbc\xfc\xff\xff\xff\xff\xff\xef?\xc4\xfcC\xc9\xe0j\x98\xbc\xfc\xff\xff\xff\xff\xff\xef?\xc4\xfcC\xc9\xe0j\x98\xbc\xfc\xff\xff\xff\xff\xff\xef?\xc4\xfcC\xc9\xe0j\x98\xbc\xfc\xff\xff\xff\xff\xff\xef?\xc4\xfcC\xc9\xe0j\x98\xbc\xfc\xff\xff\xff\xff\xff\xef?\xc4\xfcC\xc9\xe0j\x98\xbc\xfc\xff\xff\xff\xff\xff\xef?\xc4\xfcC\xc9\xe0j\x98\xbc\xfc\xff\xff\xff\xff\xff\xef?\xc4\xfcC\xc9\xe0j\x98\xbc\xfc\xff\xff\xff\xff\xff\xef?\xc4\xfcC\xc9\xe0j\x98\xbc\xfc\xff\xff\xff\xff\xff\xef?\xc4\xfcC\xc9\xe0j\x98\xbc\xfc\xff\xff\xff\xff\xff\xef?\xc4\xfcC\xc9\xe0j\x98\xbc\xfc\xff\xff\xff\xff\xff\xef?\xc4\xfcC\xc9\xe0j\x98\xbc\xfc\xff\xff\xff\xff\xff\xef?\xc4\xfcC\xc9\xe0j\x98\xbc\xfc\xff\xff\xff\xff\xff\xef?\xc4\xfcC\xc9\xe0j\x98\xbc\xfc\xff\xff\xff\xff\xff\xef?\xc4\xfcC\xc9\xe0j\x98\xbc\xfc\xff\xff\xff\xff\xff\xef?\xc4\xfcC\xc9\xe0j\x98\xbc\xfc\xff\xff\xff\xff\xff\xef?\xc4\xfcC\xc9\xe0j\x98\xbc\xfc\xff\xff\xff\xff\xff\xef?\xc4\xfcC\xc9\xe0j\x98\xbc\xfc\xff\xff\xff\xff\xff\xef?\xc4\xfcC\xc9\xe0j\x98\xbc\xfc\xff\xff\xff\xff\xff\xef?\xc4\xfcC\xc9\xe0j\x98\xbc\xfc\xff\xff\xff\xff\xff\xef?\xc4\xfcC\xc9\xe0j\x98\xbc\xfc\xff\xff\xff\xff\xff\xef?\xc4\xfcC\xc9\xe0j\x98\xbc\xfc\xff\xff\xff\xff\xff\xef?\xc4\xfcC\xc9\xe0j\x98\xbc\xfc\xff\xff\xff\xff\xff\xef?\xc4\xfcC\xc9\xe0j\x98\xbc\xfc\xff\xff\xff\xff\xff\xef?\xc4\xfcC\xc9\xe0j\x98\xbc\xfc\xff\xff\xff\xff\xff\xef?\xc4\xfcC\xc9\xe0j\x98\xbc\xfc\xff\xff\xff\xff\xff\xef?\xc4\xfcC\xc9\xe0j\x98\xbc\xfc\xff\xff\xff\xff\xff\xef?\xc4\xfcC\xc9\xe0j\x98\xbc\xfc\xff\xff\xff\xff\xff\xef?\xc4\xfcC\xc9\xe0j\x98\xbc\xfc\xff\xff\xff\xff\xff\xef?\xc4\xfcC\xc9\xe0j\x98\xbc\xfc\xff\xff\xff\xff\xff\xef?\xc4\xfcC\xc9\xe0j\x98\xbc\xfc\xff\xff\xff\xff\xff\xef?\xc4\xfcC\xc9\xe0j\x98\xbc\xfc\xff\xff\xff\xff\xff\xef?\xc4\xfcC\xc9\xe0j\x98\xbc\xfc\xff\xff\xff\xff\xff\xef?\xc4\xfcC\xc9\xe0j\x98\xbc\xfc\xff\xff\xff\xff\xff\xef?\xc4\xfcC\xc9\xe0j\x98\xbc\xfc\xff\xff\xff\xff\xff\xef?\xc4\xfcC\xc9\xe0j\x98\xbc\xfc\xff\xff\xff\xff\xff\xef?\xc4\xfcC\xc9\xe0j\x98\xbc\xfc\xff\xff\xff\xff\xff\xef?\xc4\xfcC\xc9\xe0j\x98\xbc\xfc\xff\xff\xff\xff\xff\xef?\xc4\xfcC\xc9\xe0j\x98\xbc\xfc\xff\xff\xff\xff\xff\xef?\xc4\xfcC\xc9\xe0j\x98\xbc\xfc\xff\xff\xff\xff\xff\xef?\xc4\xfcC\xc9\xe0j\x98\xbc\xfc\xff\xff\xff\xff\xff\xef?\xc4\xfcC\xc9\xe0j\x98\xbc\xfc\xff\xff\xff\xff\xff\xef?\xc4\xfcC\xc9\xe0j\x98\xbc\xfc\xff\xff\xff\xff\xff\xef?\xc4\xfcC\xc9\xe0j\x98\xbc\xfc\xff\xff\xff\xff\xff\xef?\xc4\xfcC\xc9\xe0j\x98\xbc\xfc\xff\xff\xff\xff\xff\xef?\xc4\xfcC\xc9\xe0j\x98\xbc\xfc\xff\xff\xff\xff\xff\xef?\xc4\xfcC\xc9\xe0j\x98\xbc\xfc\xff\xff\xff\xff\xff\xef?\xc4\xfcC\xc9\xe0j\x98\xbc\xfc\xff\xff\xff\xff\xff\xef?\xc4\xfcC\xc9\xe0j\x98\xbc\xfc\xff\xff\xff\xff\xff\xef?\xc4\xfcC\xc9\xe0j\x98\xbc\xfc\xff\xff\xff\xff\xff\xef?\xc4\xfcC\xc9\xe0j\x98\xbc\xfc\xff\xff\xff\xff\xff\xef?\xc4\xfcC\xc9\xe0j\x98\xbc\xfc\xff\xff\xff\xff\xff\xef?\xc4\xfcC\xc9\xe0j\x98\xbc\xfc\xff\xff\xff\xff\xff\xef?\xc4\xfcC\xc9\xe0j\x98\xbc\xfc\xff\xff\xff\xff\xff\xef?\xc4\xfcC\xc9\xe0j\x98\xbc\xfc\xff\xff\xff\xff\xff\xef?\xc4\xfcC\xc9\xe0j\x98\xbc\xfc\xff\xff\xff\xff\xff\xef?\xc4\xfcC\xc9\xe0j\x98\xbc\xfc\xff\xff\xff\xff\xff\xef?\xc4\xfcC\xc9\xe0j\x98\xbc\xfc\xff\xff\xff\xff\xff\xef?\xc4\xfcC\xc9\xe0j\x98\xbc\xfc\xff\xff\xff\xff\xff\xef?\xc4\xfcC\xc9\xe0j\x98\xbc\xfc\xff\xff\xff\xff\xff\xef?\xc4\xfcC\xc9\xe0j\x98\xbc\xfc\xff\xff\xff\xff\xff\xef?\xc4\xfcC\xc9\xe0j\x98\xbc\xfc\xff\xff\xff\xff\xff\xef?\xc4\xfcC\xc9\xe0j\x98\xbc\xfc\xff\xff\xff\xff\xff\xef?\xc4\xfcC\xc9\xe0j\x98\xbc\xfc\xff\xff\xff\xff\xff\xef?\xc4\xfcC\xc9\xe0j\x98\xbc\xfc\xff\xff\xff\xff\xff\xef?\xc4\xfcC\xc9\xe0j\x98\xbc\xfc\xff\xff\xff\xff\xff\xef?\xc4\xfcC\xc9\xe0j\x98\xbc\xfc\xff\xff\xff\xff\xff\xef?\xc4\xfcC\xc9\xe0j\x98\xbc\xfc\xff\xff\xff\xff\xff\xef?\xc4\xfcC\xc9\xe0j\x98\xbc\xfc\xff\xff\xff\xff\xff\xef?\xc4\xfcC\xc9\xe0j\x98\xbc\xfc\xff\xff\xff\xff\xff\xef?\xc4\xfcC\xc9\xe0j\x98\xbc\xfc\xff\xff\xff\xff\xff\xef?\xc4\xfcC\xc9\xe0j\x98\xbc\xfc\xff\xff\xff\xff\xff\xef?\xc4\xfcC\xc9\xe0j\x98\xbc\xfc\xff\xff\xff\xff\xff\xef?\xc4\xfcC\xc9\xe0j\x98\xbc\xfc\xff\xff\xff\xff\xff\xef?\xc4\xfcC\xc9\xe0j\x98\xbc\xfc\xff\xff\xff\xff\xff\xef?\xc4\xfcC\xc9\xe0j\x98\xbc\xfc\xff\xff\xff\xff\xff\xef?\xc4\xfcC\xc9\xe0j\x98\xbc\xfc\xff\xff\xff\xff\xff\xef?\xc4\xfcC\xc9\xe0j\x98\xbc\xfc\xff\xff\xff\xff\xff\xef?\xc4\xfcC\xc9\xe0j\x98\xbc\xfc\xff\xff\xff\xff\xff\xef?\xc4\xfcC\xc9\xe0j\x98\xbc\xfc\xff\xff\xff\xff\xff\xef?\xc4\xfcC\xc9\xe0j\x98\xbc\xfc\xff\xff\xff\xff\xff\xef?\xc4\xfcC\xc9\xe0j\x98\xbc\xfc\xff\xff\xff\xff\xff\xef?\xc4\xfcC\xc9\xe0j\x98\xbc\xfc\xff\xff\xff\xff\xff\xef?\xc4\xfcC\xc9\xe0j\x98\xbc\xfc\xff\xff\xff\xff\xff\xef?\xc4\xfcC\xc9\xe0j\x98\xbc\xfc\xff\xff\xff\xff\xff\xef?\xc4\xfcC\xc9\xe0j\x98\xbc\xfc\xff\xff\xff\xff\xff\xef?\xc4\xfcC\xc9\xe0j\x98\xbc\xfc\xff\xff\xff\xff\xff\xef?\xc4\xfcC\xc9\xe0j\x98\xbc\xfc\xff\xff\xff\xff\xff\xef?\xc4\xfcC\xc9\xe0j\x98\xbc\xfc\xff\xff\xff\xff\xff\xef?\xc4\xfcC\xc9\xe0j\x98\xbc\xfc\xff\xff\xff\xff\xff\xef?\xc4\xfcC\xc9\xe0j\x98\xbc\xfc\xff\xff\xff\xff\xff\xef?\xc4\xfcC\xc9\xe0j\x98\xbc\xfc\xff\xff\xff\xff\xff\xef?\xc4\xfcC\xc9\xe0j\x98\xbc\xfc\xff\xff\xff\xff\xff\xef?\xc4\xfcC\xc9\xe0j\x98\xbc\xfc\xff\xff\xff\xff\xff\xef?\xc4\xfcC\xc9\xe0j\x98\xbc\xfc\xff\xff\xff\xff\xff\xef?\xc4\xfcC\xc9\xe0j\x98\xbc\xfc\xff\xff\xff\xff\xff\xef?\xc4\xfcC\xc9\xe0j\x98\xbc\xfc\xff\xff\xff\xff\xff\xef?\xc4\xfcC\xc9\xe0j\x98\xbc\xfc\xff\xff\xff\xff\xff\xef?\xc4\xfcC\xc9\xe0j\x98\xbc\xfc\xff\xff\xff\xff\xff\xef?\xc4\xfcC\xc9\xe0j\x98\xbc\xfc\xff\xff\xff\xff\xff\xef?\xc4\xfcC\xc9\xe0j\x98\xbc\xfc\xff\xff\xff\xff\xff\xef?\xc4\xfcC\xc9\xe0j\x98\xbc\xfc\xff\xff\xff\xff\xff\xef?\xc4\xfcC\xc9\xe0j\x98\xbc\xfc\xff\xff\xff\xff\xff\xef?\xc4\xfcC\xc9\xe0j\x98\xbc\xfc\xff\xff\xff\xff\xff\xef?\xc4\xfcC\xc9\xe0j\x98\xbc\xfc\xff\xff\xff\xff\xff\xef?\xc4\xfcC\xc9\xe0j\x98\xbc\xfc\xff\xff\xff\xff\xff\xef?\xc4\xfcC\xc9\xe0j\x98\xbc\xfc\xff\xff\xff\xff\xff\xef?\xc4\xfcC\xc9\xe0j\x98\xbc\xfc\xff\xff\xff\xff\xff\xef?\xc4\xfcC\xc9\xe0j\x98\xbc\xfc\xff\xff\xff\xff\xff\xef?\xc4\xfcC\xc9\xe0j\x98\xbc\xfc\xff\xff\xff\xff\xff\xef?\xc4\xfcC\xc9\xe0j\x98\xbc\xfc\xff\xff\xff\xff\xff\xef?\xc4\xfcC\xc9\xe0j\x98\xbc\xfc\xff\xff\xff\xff\xff\xef?\xc4\xfcC\xc9\xe0j\x98\xbc\xfc\xff\xff\xff\xff\xff\xef?\xc4\xfcC\xc9\xe0j\x98\xbc\xfc\xff\xff\xff\xff\xff\xef?\xc4\xfcC\xc9\xe0j\x98\xbc\xfc\xff\xff\xff\xff\xff\xef?\xc4\xfcC\xc9\xe0j\x98\xbc\xfc\xff\xff\xff\xff\xff\xef?\xc4\xfcC\xc9\xe0j\x98\xbc\xfc\xff\xff\xff\xff\xff\xef?\xc4\xfcC\xc9\xe0j\x98\xbc\xfc\xff\xff\xff\xff\xff\xef?\xc4\xfcC\xc9\xe0j\x98\xbc\xfc\xff\xff\xff\xff\xff\xef?\xc4\xfcC\xc9\xe0j\x98\xbc\xfc\xff\xff\xff\xff\xff\xef?\xc4\xfcC\xc9\xe0j\x98\xbc\xfc\xff\xff\xff\xff\xff\xef?\xc4\xfcC\xc9\xe0j\x98\xbc\xfc\xff\xff\xff\xff\xff\xef?\xc4\xfcC\xc9\xe0j\x98\xbc\xfc\xff\xff\xff\xff\xff\xef?\xc4\xfcC\xc9\xe0j\x98\xbc\xfc\xff\xff\xff\xff\xff\xef?\xc4\xfcC\xc9\xe0j\x98\xbc\xfc\xff\xff\xff\xff\xff\xef?\xc4\xfcC\xc9\xe0j\x98\xbc\xfc\xff\xff\xff\xff\xff\xef?\xc4\xfcC\xc9\xe0j\x98\xbc\xfc\xff\xff\xff\xff\xff\xef?\xc4\xfcC\xc9\xe0j\x98\xbc\xfc\xff\xff\xff\xff\xff\xef?\xc4\xfcC\xc9\xe0j\x98\xbc\xfc\xff\xff\xff\xff\xff\xef?\xc4\xfcC\xc9\xe0j\x98\xbc\xfc\xff\xff\xff\xff\xff\xef?\xc4\xfcC\xc9\xe0j\x98\xbc\xfc\xff\xff\xff\xff\xff\xef?\xc4\xfcC\xc9\xe0j\x98\xbc\xfc\xff\xff\xff\xff\xff\xef?\xc4\xfcC\xc9\xe0j\x98\xbc\xfc\xff\xff\xff\xff\xff\xef?\xc4\xfcC\xc9\xe0j\x98\xbc\xfc\xff\xff\xff\xff\xff\xef?\xc4\xfcC\xc9\xe0j\x98\xbc\xfc\xff\xff\xff\xff\xff\xef?\xc4\xfcC\xc9\xe0j\x98\xbc\xfc\xff\xff\xff\xff\xff\xef?\xc4\xfcC\xc9\xe0j\x98\xbc\xfc\xff\xff\xff\xff\xff\xef?\xc4\xfcC\xc9\xe0j\x98\xbc\xfc\xff\xff\xff\xff\xff\xef?\xc4\xfcC\xc9\xe0j\x98\xbc\xfc\xff\xff\xff\xff\xff\xef?\xc4\xfcC\xc9\xe0j\x98\xbc\xfc\xff\xff\xff\xff\xff\xef?\xc4\xfcC\xc9\xe0j\x98\xbc\xfc\xff\xff\xff\xff\xff\xef?\xc4\xfcC\xc9\xe0j\x98\xbc\xfc\xff\xff\xff\xff\xff\xef?\xc4\xfcC\xc9\xe0j\x98\xbc\xfc\xff\xff\xff\xff\xff\xef?\xc4\xfcC\xc9\xe0j\x98\xbc\xfc\xff\xff\xff\xff\xff\xef?\xc4\xfcC\xc9\xe0j\x98\xbc\xfc\xff\xff\xff\xff\xff\xef?\xc4\xfcC\xc9\xe0j\x98\xbc\xfc\xff\xff\xff\xff\xff\xef?\xc4\xfcC\xc9\xe0j\x98\xbc\xfc\xff\xff\xff\xff\xff\xef?\xc4\xfcC\xc9\xe0j\x98\xbc\xfc\xff\xff\xff\xff\xff\xef?\xc4\xfcC\xc9\xe0j\x98\xbc\xfc\xff\xff\xff\xff\xff\xef?\xc4\xfcC\xc9\xe0j\x98\xbc\xfc\xff\xff\xff\xff\xff\xef?\xc4\xfcC\xc9\xe0j\x98\xbc\xfc\xff\xff\xff\xff\xff\xef?\xc4\xfcC\xc9\xe0j\x98\xbc\xfc\xff\xff\xff\xff\xff\xef?\xc4\xfcC\xc9\xe0j\x98\xbc\xfc\xff\xff\xff\xff\xff\xef?\xc4\xfcC\xc9\xe0j\x98\xbc\xfc\xff\xff\xff\xff\xff\xef?\xc4\xfcC\xc9\xe0j\x98\xbc\xfc\xff\xff\xff\xff\xff\xef?\xc4\xfcC\xc9\xe0j\x98\xbc\xfc\xff\xff\xff\xff\xff\xef?\xc4\xfcC\xc9\xe0j\x98\xbc\xfc\xff\xff\xff\xff\xff\xef?\xc4\xfcC\xc9\xe0j\x98\xbc\xfc\xff\xff\xff\xff\xff\xef?\xc4\xfcC\xc9\xe0j\x98\xbc\xfc\xff\xff\xff\xff\xff\xef?\xc4\xfcC\xc9\xe0j\x98\xbc\xfc\xff\xff\xff\xff\xff\xef?\xc4\xfcC\xc9\xe0j\x98\xbc\xfc\xff\xff\xff\xff\xff\xef?\xc4\xfcC\xc9\xe0j\x98\xbc\xfc\xff\xff\xff\xff\xff\xef?\xc4\xfcC\xc9\xe0j\x98\xbc\xfc\xff\xff\xff\xff\xff\xef?\xc4\xfcC\xc9\xe0j\x98\xbc\xfc\xff\xff\xff\xff\xff\xef?\xc4\xfcC\xc9\xe0j\x98\xbc\xfc\xff\xff\xff\xff\xff\xef?\xc4\xfcC\xc9\xe0j\x98\xbc\xfc\xff\xff\xff\xff\xff\xef?\xc4\xfcC\xc9\xe0j\x98\xbc\xfc\xff\xff\xff\xff\xff\xef?\xc4\xfcC\xc9\xe0j\x98\xbc\xfc\xff\xff\xff\xff\xff\xef?\xc4\xfcC\xc9\xe0j\x98\xbc\xfc\xff\xff\xff\xff\xff\xef?\xc4\xfcC\xc9\xe0j\x98\xbc\xfc\xff\xff\xff\xff\xff\xef?\xc4\xfcC\xc9\xe0j\x98\xbc\xfc\xff\xff\xff\xff\xff\xef?\xc4\xfcC\xc9\xe0j\x98\xbc\xfc\xff\xff\xff\xff\xff\xef?\xc4\xfcC\xc9\xe0j\x98\xbc\xfc\xff\xff\xff\xff\xff\xef?\xc4\xfcC\xc9\xe0j\x98\xbc\xfc\xff\xff\xff\xff\xff\xef?\xc4\xfcC\xc9\xe0j\x98\xbc\xfc\xff\xff\xff\xff\xff\xef?\xc4\xfcC\xc9\xe0j\x98\xbc\xfc\xff\xff\xff\xff\xff\xef?\xc4\xfcC\xc9\xe0j\x98\xbc\xfc\xff\xff\xff\xff\xff\xef?\xc4\xfcC\xc9\xe0j\x98\xbc\xfc\xff\xff\xff\xff\xff\xef?\xc4\xfcC\xc9\xe0j\x98\xbc\xfc\xff\xff\xff\xff\xff\xef?\xc4\xfcC\xc9\xe0j\x98\xbc\xfc\xff\xff\xff\xff\xff\xef?\xc4\xfcC\xc9\xe0j\x98\xbc\xfc\xff\xff\xff\xff\xff\xef?\xc4\xfcC\xc9\xe0j\x98\xbc\xfc\xff\xff\xff\xff\xff\xef?\xc4\xfcC\xc9\xe0j\x98\xbc\xfc\xff\xff\xff\xff\xff\xef?\xc4\xfcC\xc9\xe0j\x98\xbc\xfc\xff\xff\xff\xff\xff\xef?\xc4\xfcC\xc9\xe0j\x98\xbc\xfc\xff\xff\xff\xff\xff\xef?\xc4\xfcC\xc9\xe0j\x98\xbc\xfc\xff\xff\xff\xff\xff\xef?\xc4\xfcC\xc9\xe0j\x98\xbc\xfc\xff\xff\xff\xff\xff\xef?\xc4\xfcC\xc9\xe0j\x98\xbc\xfc\xff\xff\xff\xff\xff\xef?\xc4\xfcC\xc9\xe0j\x98\xbc\xfc\xff\xff\xff\xff\xff\xef?\xc4\xfcC\xc9\xe0j\x98\xbc\xfc\xff\xff\xff\xff\xff\xef?\xc4\xfcC\xc9\xe0j\x98\xbc\xfc\xff\xff\xff\xff\xff\xef?\xc4\xfcC\xc9\xe0j\x98\xbc\xfc\xff\xff\xff\xff\xff\xef?\xc4\xfcC\xc9\xe0j\x98\xbc\xfc\xff\xff\xff\xff\xff\xef?\xc4\xfcC\xc9\xe0j\x98\xbc\xfc\xff\xff\xff\xff\xff\xef?\xc4\xfcC\xc9\xe0j\x98\xbc\xfc\xff\xff\xff\xff\xff\xef?\xc4\xfcC\xc9\xe0j\x98\xbc\xfc\xff\xff\xff\xff\xff\xef?\xc4\xfcC\xc9\xe0j\x98\xbc\xfc\xff\xff\xff\xff\xff\xef?\xc4\xfcC\xc9\xe0j\x98\xbc\xfc\xff\xff\xff\xff\xff\xef?\xc4\xfcC\xc9\xe0j\x98\xbc\xfc\xff\xff\xff\xff\xff\xef?\xc4\xfcC\xc9\xe0j\x98\xbc\xfc\xff\xff\xff\xff\xff\xef?\xc4\xfcC\xc9\xe0j\x98\xbc\xfc\xff\xff\xff\xff\xff\xef?\xc4\xfcC\xc9\xe0j\x98\xbc\xfc\xff\xff\xff\xff\xff\xef?\xc4\xfcC\xc9\xe0j\x98\xbc\xfc\xff\xff\xff\xff\xff\xef?\xc4\xfcC\xc9\xe0j\x98\xbc\xfc\xff\xff\xff\xff\xff\xef?\xc4\xfcC\xc9\xe0j\x98\xbc\xfc\xff\xff\xff\xff\xff\xef?\xc4\xfcC\xc9\xe0j\x98\xbc\xfc\xff\xff\xff\xff\xff\xef?\xc4\xfcC\xc9\xe0j\x98\xbc\xfc\xff\xff\xff\xff\xff\xef?\xc4\xfcC\xc9\xe0j\x98\xbc\xfc\xff\xff\xff\xff\xff\xef?\xc4\xfcC\xc9\xe0j\x98\xbc\xfc\xff\xff\xff\xff\xff\xef?\xc4\xfcC\xc9\xe0j\x98\xbc\xfc\xff\xff\xff\xff\xff\xef?\xc4\xfcC\xc9\xe0j\x98\xbc\xfc\xff\xff\xff\xff\xff\xef?\xc4\xfcC\xc9\xe0j\x98\xbc\xfc\xff\xff\xff\xff\xff\xef?\xc4\xfcC\xc9\xe0j\x98\xbc\xfc\xff\xff\xff\xff\xff\xef?\xc4\xfcC\xc9\xe0j\x98\xbc\xfc\xff\xff\xff\xff\xff\xef?\xc4\xfcC\xc9\xe0j\x98\xbc\xfc\xff\xff\xff\xff\xff\xef?\xc4\xfcC\xc9\xe0j\x98\xbc\xfc\xff\xff\xff\xff\xff\xef?\xc4\xfcC\xc9\xe0j\x98\xbc\xfc\xff\xff\xff\xff\xff\xef?\xc4\xfcC\xc9\xe0j\x98\xbc\xfc\xff\xff\xff\xff\xff\xef?\xc4\xfcC\xc9\xe0j\x98\xbc\xfc\xff\xff\xff\xff\xff\xef?\xc4\xfcC\xc9\xe0j\x98\xbc\xfc\xff\xff\xff\xff\xff\xef?\xc4\xfcC\xc9\xe0j\x98\xbc\xfc\xff\xff\xff\xff\xff\xef?\xc4\xfcC\xc9\xe0j\x98\xbc\xfc\xff\xff\xff\xff\xff\xef?\xc4\xfcC\xc9\xe0j\x98\xbc\xfc\xff\xff\xff\xff\xff\xef?\xc4\xfcC\xc9\xe0j\x98\xbc\xfc\xff\xff\xff\xff\xff\xef?\xc4\xfcC\xc9\xe0j\x98\xbc\xfc\xff\xff\xff\xff\xff\xef?\xc4\xfcC\xc9\xe0j\x98\xbc\xfc\xff\xff\xff\xff\xff\xef?\xc4\xfcC\xc9\xe0j\x98\xbc\xfc\xff\xff\xff\xff\xff\xef?'
p203
tp204
bag2
(g3
(I0
tp205
g5
tp206
Rp207
(I1
(I2
I237
tp208
g12
I01
S'\xc4\xfcC\xc9\xe0j\x98\xbc\xfc\xff\xff\xff\xff\xff\xef?\xc4\xfcC\xc9\xe0j\x98\xbc\xfc\xff\xff\xff\xff\xff\xef?\xc4\xfcC\xc9\xe0j\x98\xbc\xfc\xff\xff\xff\xff\xff\xef?\xc4\xfcC\xc9\xe0j\x98\xbc\xfc\xff\xff\xff\xff\xff\xef?\xc4\xfcC\xc9\xe0j\x98\xbc\xfc\xff\xff\xff\xff\xff\xef?\xc4\xfcC\xc9\xe0j\x98\xbc\xfc\xff\xff\xff\xff\xff\xef?\xc4\xfcC\xc9\xe0j\x98\xbc\xfc\xff\xff\xff\xff\xff\xef?\xc4\xfcC\xc9\xe0j\x98\xbc\xfc\xff\xff\xff\xff\xff\xef?\xc4\xfcC\xc9\xe0j\x98\xbc\xfc\xff\xff\xff\xff\xff\xef?\xc4\xfcC\xc9\xe0j\x98\xbc\xfc\xff\xff\xff\xff\xff\xef?\xc4\xfcC\xc9\xe0j\x98\xbc\xfc\xff\xff\xff\xff\xff\xef?\xc4\xfcC\xc9\xe0j\x98\xbc\xfc\xff\xff\xff\xff\xff\xef?\xc4\xfcC\xc9\xe0j\x98\xbc\xfc\xff\xff\xff\xff\xff\xef?\xc4\xfcC\xc9\xe0j\x98\xbc\xfc\xff\xff\xff\xff\xff\xef?\xc4\xfcC\xc9\xe0j\x98\xbc\xfc\xff\xff\xff\xff\xff\xef?\xc4\xfcC\xc9\xe0j\x98\xbc\xfc\xff\xff\xff\xff\xff\xef?\xc4\xfcC\xc9\xe0j\x98\xbc\xfc\xff\xff\xff\xff\xff\xef?\xc4\xfcC\xc9\xe0j\x98\xbc\xfc\xff\xff\xff\xff\xff\xef?\xc4\xfcC\xc9\xe0j\x98\xbc\xfc\xff\xff\xff\xff\xff\xef?\xc4\xfcC\xc9\xe0j\x98\xbc\xfc\xff\xff\xff\xff\xff\xef?\xc4\xfcC\xc9\xe0j\x98\xbc\xfc\xff\xff\xff\xff\xff\xef?\xc4\xfcC\xc9\xe0j\x98\xbc\xfc\xff\xff\xff\xff\xff\xef?\xc4\xfcC\xc9\xe0j\x98\xbc\xfc\xff\xff\xff\xff\xff\xef?\xc4\xfcC\xc9\xe0j\x98\xbc\xfc\xff\xff\xff\xff\xff\xef?\xc4\xfcC\xc9\xe0j\x98\xbc\xfc\xff\xff\xff\xff\xff\xef?\xc4\xfcC\xc9\xe0j\x98\xbc\xfc\xff\xff\xff\xff\xff\xef?\xc4\xfcC\xc9\xe0j\x98\xbc\xfc\xff\xff\xff\xff\xff\xef?\xc4\xfcC\xc9\xe0j\x98\xbc\xfc\xff\xff\xff\xff\xff\xef?\xc4\xfcC\xc9\xe0j\x98\xbc\xfc\xff\xff\xff\xff\xff\xef?\xc4\xfcC\xc9\xe0j\x98\xbc\xfc\xff\xff\xff\xff\xff\xef?\xc4\xfcC\xc9\xe0j\x98\xbc\xfc\xff\xff\xff\xff\xff\xef?\xc4\xfcC\xc9\xe0j\x98\xbc\xfc\xff\xff\xff\xff\xff\xef?\xc4\xfcC\xc9\xe0j\x98\xbc\xfc\xff\xff\xff\xff\xff\xef?\xc4\xfcC\xc9\xe0j\x98\xbc\xfc\xff\xff\xff\xff\xff\xef?\xc4\xfcC\xc9\xe0j\x98\xbc\xfc\xff\xff\xff\xff\xff\xef?\xc4\xfcC\xc9\xe0j\x98\xbc\xfc\xff\xff\xff\xff\xff\xef?\xc4\xfcC\xc9\xe0j\x98\xbc\xfc\xff\xff\xff\xff\xff\xef?\xc4\xfcC\xc9\xe0j\x98\xbc\xfc\xff\xff\xff\xff\xff\xef?\xc4\xfcC\xc9\xe0j\x98\xbc\xfc\xff\xff\xff\xff\xff\xef?\xc4\xfcC\xc9\xe0j\x98\xbc\xfc\xff\xff\xff\xff\xff\xef?\xc4\xfcC\xc9\xe0j\x98\xbc\xfc\xff\xff\xff\xff\xff\xef?\xc4\xfcC\xc9\xe0j\x98\xbc\xfc\xff\xff\xff\xff\xff\xef?\xc4\xfcC\xc9\xe0j\x98\xbc\xfc\xff\xff\xff\xff\xff\xef?\xc4\xfcC\xc9\xe0j\x98\xbc\xfc\xff\xff\xff\xff\xff\xef?\xc4\xfcC\xc9\xe0j\x98\xbc\xfc\xff\xff\xff\xff\xff\xef?\xc4\xfcC\xc9\xe0j\x98\xbc\xfc\xff\xff\xff\xff\xff\xef?\xc4\xfcC\xc9\xe0j\x98\xbc\xfc\xff\xff\xff\xff\xff\xef?\xc4\xfcC\xc9\xe0j\x98\xbc\xfc\xff\xff\xff\xff\xff\xef?\xc4\xfcC\xc9\xe0j\x98\xbc\xfc\xff\xff\xff\xff\xff\xef?\xc4\xfcC\xc9\xe0j\x98\xbc\xfc\xff\xff\xff\xff\xff\xef?\xc4\xfcC\xc9\xe0j\x98\xbc\xfc\xff\xff\xff\xff\xff\xef?\xc4\xfcC\xc9\xe0j\x98\xbc\xfc\xff\xff\xff\xff\xff\xef?\xc4\xfcC\xc9\xe0j\x98\xbc\xfc\xff\xff\xff\xff\xff\xef?\xc4\xfcC\xc9\xe0j\x98\xbc\xfc\xff\xff\xff\xff\xff\xef?\xc4\xfcC\xc9\xe0j\x98\xbc\xfc\xff\xff\xff\xff\xff\xef?\xc4\xfcC\xc9\xe0j\x98\xbc\xfc\xff\xff\xff\xff\xff\xef?\xc4\xfcC\xc9\xe0j\x98\xbc\xfc\xff\xff\xff\xff\xff\xef?\xc4\xfcC\xc9\xe0j\x98\xbc\xfc\xff\xff\xff\xff\xff\xef?\xc4\xfcC\xc9\xe0j\x98\xbc\xfc\xff\xff\xff\xff\xff\xef?\xc4\xfcC\xc9\xe0j\x98\xbc\xfc\xff\xff\xff\xff\xff\xef?\xc4\xfcC\xc9\xe0j\x98\xbc\xfc\xff\xff\xff\xff\xff\xef?\xc4\xfcC\xc9\xe0j\x98\xbc\xfc\xff\xff\xff\xff\xff\xef?\xc4\xfcC\xc9\xe0j\x98\xbc\xfc\xff\xff\xff\xff\xff\xef?\xc4\xfcC\xc9\xe0j\x98\xbc\xfc\xff\xff\xff\xff\xff\xef?\xc4\xfcC\xc9\xe0j\x98\xbc\xfc\xff\xff\xff\xff\xff\xef?\xc4\xfcC\xc9\xe0j\x98\xbc\xfc\xff\xff\xff\xff\xff\xef?\xc4\xfcC\xc9\xe0j\x98\xbc\xfc\xff\xff\xff\xff\xff\xef?\xc4\xfcC\xc9\xe0j\x98\xbc\xfc\xff\xff\xff\xff\xff\xef?\xc4\xfcC\xc9\xe0j\x98\xbc\xfc\xff\xff\xff\xff\xff\xef?\xc4\xfcC\xc9\xe0j\x98\xbc\xfc\xff\xff\xff\xff\xff\xef?\xc4\xfcC\xc9\xe0j\x98\xbc\xfc\xff\xff\xff\xff\xff\xef?\xc4\xfcC\xc9\xe0j\x98\xbc\xfc\xff\xff\xff\xff\xff\xef?\xc4\xfcC\xc9\xe0j\x98\xbc\xfc\xff\xff\xff\xff\xff\xef?\xc4\xfcC\xc9\xe0j\x98\xbc\xfc\xff\xff\xff\xff\xff\xef?\xc4\xfcC\xc9\xe0j\x98\xbc\xfc\xff\xff\xff\xff\xff\xef?\xc4\xfcC\xc9\xe0j\x98\xbc\xfc\xff\xff\xff\xff\xff\xef?\xc4\xfcC\xc9\xe0j\x98\xbc\xfc\xff\xff\xff\xff\xff\xef?\xc4\xfcC\xc9\xe0j\x98\xbc\xfc\xff\xff\xff\xff\xff\xef?\xc4\xfcC\xc9\xe0j\x98\xbc\xfc\xff\xff\xff\xff\xff\xef?\xc4\xfcC\xc9\xe0j\x98\xbc\xfc\xff\xff\xff\xff\xff\xef?\xc4\xfcC\xc9\xe0j\x98\xbc\xfc\xff\xff\xff\xff\xff\xef?\xc4\xfcC\xc9\xe0j\x98\xbc\xfc\xff\xff\xff\xff\xff\xef?\xc4\xfcC\xc9\xe0j\x98\xbc\xfc\xff\xff\xff\xff\xff\xef?\xc4\xfcC\xc9\xe0j\x98\xbc\xfc\xff\xff\xff\xff\xff\xef?\xc4\xfcC\xc9\xe0j\x98\xbc\xfc\xff\xff\xff\xff\xff\xef?\xc4\xfcC\xc9\xe0j\x98\xbc\xfc\xff\xff\xff\xff\xff\xef?\xc4\xfcC\xc9\xe0j\x98\xbc\xfc\xff\xff\xff\xff\xff\xef?\xc4\xfcC\xc9\xe0j\x98\xbc\xfc\xff\xff\xff\xff\xff\xef?\xc4\xfcC\xc9\xe0j\x98\xbc\xfc\xff\xff\xff\xff\xff\xef?\xc4\xfcC\xc9\xe0j\x98\xbc\xfc\xff\xff\xff\xff\xff\xef?\xc4\xfcC\xc9\xe0j\x98\xbc\xfc\xff\xff\xff\xff\xff\xef?\xc4\xfcC\xc9\xe0j\x98\xbc\xfc\xff\xff\xff\xff\xff\xef?\xc4\xfcC\xc9\xe0j\x98\xbc\xfc\xff\xff\xff\xff\xff\xef?\xc4\xfcC\xc9\xe0j\x98\xbc\xfc\xff\xff\xff\xff\xff\xef?\xc4\xfcC\xc9\xe0j\x98\xbc\xfc\xff\xff\xff\xff\xff\xef?\xc4\xfcC\xc9\xe0j\x98\xbc\xfc\xff\xff\xff\xff\xff\xef?\xc4\xfcC\xc9\xe0j\x98\xbc\xfc\xff\xff\xff\xff\xff\xef?\xc4\xfcC\xc9\xe0j\x98\xbc\xfc\xff\xff\xff\xff\xff\xef?\xc4\xfcC\xc9\xe0j\x98\xbc\xfc\xff\xff\xff\xff\xff\xef?\xc4\xfcC\xc9\xe0j\x98\xbc\xfc\xff\xff\xff\xff\xff\xef?\xc4\xfcC\xc9\xe0j\x98\xbc\xfc\xff\xff\xff\xff\xff\xef?\xc4\xfcC\xc9\xe0j\x98\xbc\xfc\xff\xff\xff\xff\xff\xef?\xc4\xfcC\xc9\xe0j\x98\xbc\xfc\xff\xff\xff\xff\xff\xef?\xc4\xfcC\xc9\xe0j\x98\xbc\xfc\xff\xff\xff\xff\xff\xef?\xc4\xfcC\xc9\xe0j\x98\xbc\xfc\xff\xff\xff\xff\xff\xef?\xc4\xfcC\xc9\xe0j\x98\xbc\xfc\xff\xff\xff\xff\xff\xef?\xc4\xfcC\xc9\xe0j\x98\xbc\xfc\xff\xff\xff\xff\xff\xef?\xc4\xfcC\xc9\xe0j\x98\xbc\xfc\xff\xff\xff\xff\xff\xef?\xc4\xfcC\xc9\xe0j\x98\xbc\xfc\xff\xff\xff\xff\xff\xef?\xc4\xfcC\xc9\xe0j\x98\xbc\xfc\xff\xff\xff\xff\xff\xef?\xc4\xfcC\xc9\xe0j\x98\xbc\xfc\xff\xff\xff\xff\xff\xef?\xc4\xfcC\xc9\xe0j\x98\xbc\xfc\xff\xff\xff\xff\xff\xef?\xc4\xfcC\xc9\xe0j\x98\xbc\xfc\xff\xff\xff\xff\xff\xef?\xc4\xfcC\xc9\xe0j\x98\xbc\xfc\xff\xff\xff\xff\xff\xef?\xc4\xfcC\xc9\xe0j\x98\xbc\xfc\xff\xff\xff\xff\xff\xef?\xc4\xfcC\xc9\xe0j\x98\xbc\xfc\xff\xff\xff\xff\xff\xef?\xc4\xfcC\xc9\xe0j\x98\xbc\xfc\xff\xff\xff\xff\xff\xef?\xc4\xfcC\xc9\xe0j\x98\xbc\xfc\xff\xff\xff\xff\xff\xef?\xc4\xfcC\xc9\xe0j\x98\xbc\xfc\xff\xff\xff\xff\xff\xef?\xc4\xfcC\xc9\xe0j\x98\xbc\xfc\xff\xff\xff\xff\xff\xef?\xc4\xfcC\xc9\xe0j\x98\xbc\xfc\xff\xff\xff\xff\xff\xef?\xc4\xfcC\xc9\xe0j\x98\xbc\xfc\xff\xff\xff\xff\xff\xef?\xc4\xfcC\xc9\xe0j\x98\xbc\xfc\xff\xff\xff\xff\xff\xef?\xc4\xfcC\xc9\xe0j\x98\xbc\xfc\xff\xff\xff\xff\xff\xef?\xc4\xfcC\xc9\xe0j\x98\xbc\xfc\xff\xff\xff\xff\xff\xef?\xc4\xfcC\xc9\xe0j\x98\xbc\xfc\xff\xff\xff\xff\xff\xef?\xc4\xfcC\xc9\xe0j\x98\xbc\xfc\xff\xff\xff\xff\xff\xef?\xc4\xfcC\xc9\xe0j\x98\xbc\xfc\xff\xff\xff\xff\xff\xef?\xc4\xfcC\xc9\xe0j\x98\xbc\xfc\xff\xff\xff\xff\xff\xef?\xc4\xfcC\xc9\xe0j\x98\xbc\xfc\xff\xff\xff\xff\xff\xef?\xc4\xfcC\xc9\xe0j\x98\xbc\xfc\xff\xff\xff\xff\xff\xef?\xc4\xfcC\xc9\xe0j\x98\xbc\xfc\xff\xff\xff\xff\xff\xef?\xc4\xfcC\xc9\xe0j\x98\xbc\xfc\xff\xff\xff\xff\xff\xef?\xc4\xfcC\xc9\xe0j\x98\xbc\xfc\xff\xff\xff\xff\xff\xef?\xc4\xfcC\xc9\xe0j\x98\xbc\xfc\xff\xff\xff\xff\xff\xef?\xc4\xfcC\xc9\xe0j\x98\xbc\xfc\xff\xff\xff\xff\xff\xef?\xc4\xfcC\xc9\xe0j\x98\xbc\xfc\xff\xff\xff\xff\xff\xef?\xc4\xfcC\xc9\xe0j\x98\xbc\xfc\xff\xff\xff\xff\xff\xef?\xc4\xfcC\xc9\xe0j\x98\xbc\xfc\xff\xff\xff\xff\xff\xef?\xc4\xfcC\xc9\xe0j\x98\xbc\xfc\xff\xff\xff\xff\xff\xef?\xc4\xfcC\xc9\xe0j\x98\xbc\xfc\xff\xff\xff\xff\xff\xef?\xc4\xfcC\xc9\xe0j\x98\xbc\xfc\xff\xff\xff\xff\xff\xef?\xc4\xfcC\xc9\xe0j\x98\xbc\xfc\xff\xff\xff\xff\xff\xef?\xc4\xfcC\xc9\xe0j\x98\xbc\xfc\xff\xff\xff\xff\xff\xef?\xc4\xfcC\xc9\xe0j\x98\xbc\xfc\xff\xff\xff\xff\xff\xef?\xc4\xfcC\xc9\xe0j\x98\xbc\xfc\xff\xff\xff\xff\xff\xef?\xc4\xfcC\xc9\xe0j\x98\xbc\xfc\xff\xff\xff\xff\xff\xef?\xc4\xfcC\xc9\xe0j\x98\xbc\xfc\xff\xff\xff\xff\xff\xef?\xc4\xfcC\xc9\xe0j\x98\xbc\xfc\xff\xff\xff\xff\xff\xef?\xc4\xfcC\xc9\xe0j\x98\xbc\xfc\xff\xff\xff\xff\xff\xef?\xc4\xfcC\xc9\xe0j\x98\xbc\xfc\xff\xff\xff\xff\xff\xef?\xc4\xfcC\xc9\xe0j\x98\xbc\xfc\xff\xff\xff\xff\xff\xef?\xc4\xfcC\xc9\xe0j\x98\xbc\xfc\xff\xff\xff\xff\xff\xef?\xc4\xfcC\xc9\xe0j\x98\xbc\xfc\xff\xff\xff\xff\xff\xef?\xc4\xfcC\xc9\xe0j\x98\xbc\xfc\xff\xff\xff\xff\xff\xef?\xc4\xfcC\xc9\xe0j\x98\xbc\xfc\xff\xff\xff\xff\xff\xef?\xc4\xfcC\xc9\xe0j\x98\xbc\xfc\xff\xff\xff\xff\xff\xef?\xc4\xfcC\xc9\xe0j\x98\xbc\xfc\xff\xff\xff\xff\xff\xef?\xc4\xfcC\xc9\xe0j\x98\xbc\xfc\xff\xff\xff\xff\xff\xef?\xc4\xfcC\xc9\xe0j\x98\xbc\xfc\xff\xff\xff\xff\xff\xef?\xc4\xfcC\xc9\xe0j\x98\xbc\xfc\xff\xff\xff\xff\xff\xef?\xc4\xfcC\xc9\xe0j\x98\xbc\xfc\xff\xff\xff\xff\xff\xef?\xc4\xfcC\xc9\xe0j\x98\xbc\xfc\xff\xff\xff\xff\xff\xef?\xc4\xfcC\xc9\xe0j\x98\xbc\xfc\xff\xff\xff\xff\xff\xef?\xc4\xfcC\xc9\xe0j\x98\xbc\xfc\xff\xff\xff\xff\xff\xef?\xc4\xfcC\xc9\xe0j\x98\xbc\xfc\xff\xff\xff\xff\xff\xef?\xc4\xfcC\xc9\xe0j\x98\xbc\xfc\xff\xff\xff\xff\xff\xef?\xc4\xfcC\xc9\xe0j\x98\xbc\xfc\xff\xff\xff\xff\xff\xef?\xc4\xfcC\xc9\xe0j\x98\xbc\xfc\xff\xff\xff\xff\xff\xef?\xc4\xfcC\xc9\xe0j\x98\xbc\xfc\xff\xff\xff\xff\xff\xef?\xc4\xfcC\xc9\xe0j\x98\xbc\xfc\xff\xff\xff\xff\xff\xef?\xc4\xfcC\xc9\xe0j\x98\xbc\xfc\xff\xff\xff\xff\xff\xef?\xc4\xfcC\xc9\xe0j\x98\xbc\xfc\xff\xff\xff\xff\xff\xef?\xc4\xfcC\xc9\xe0j\x98\xbc\xfc\xff\xff\xff\xff\xff\xef?\xc4\xfcC\xc9\xe0j\x98\xbc\xfc\xff\xff\xff\xff\xff\xef?\xc4\xfcC\xc9\xe0j\x98\xbc\xfc\xff\xff\xff\xff\xff\xef?\xc4\xfcC\xc9\xe0j\x98\xbc\xfc\xff\xff\xff\xff\xff\xef?\xc4\xfcC\xc9\xe0j\x98\xbc\xfc\xff\xff\xff\xff\xff\xef?\xc4\xfcC\xc9\xe0j\x98\xbc\xfc\xff\xff\xff\xff\xff\xef?\xc4\xfcC\xc9\xe0j\x98\xbc\xfc\xff\xff\xff\xff\xff\xef?\xc4\xfcC\xc9\xe0j\x98\xbc\xfc\xff\xff\xff\xff\xff\xef?\xc4\xfcC\xc9\xe0j\x98\xbc\xfc\xff\xff\xff\xff\xff\xef?\xc4\xfcC\xc9\xe0j\x98\xbc\xfc\xff\xff\xff\xff\xff\xef?\xc4\xfcC\xc9\xe0j\x98\xbc\xfc\xff\xff\xff\xff\xff\xef?\xc4\xfcC\xc9\xe0j\x98\xbc\xfc\xff\xff\xff\xff\xff\xef?\xc4\xfcC\xc9\xe0j\x98\xbc\xfc\xff\xff\xff\xff\xff\xef?\xc4\xfcC\xc9\xe0j\x98\xbc\xfc\xff\xff\xff\xff\xff\xef?\xc4\xfcC\xc9\xe0j\x98\xbc\xfc\xff\xff\xff\xff\xff\xef?\xc4\xfcC\xc9\xe0j\x98\xbc\xfc\xff\xff\xff\xff\xff\xef?\xc4\xfcC\xc9\xe0j\x98\xbc\xfc\xff\xff\xff\xff\xff\xef?\xc4\xfcC\xc9\xe0j\x98\xbc\xfc\xff\xff\xff\xff\xff\xef?\xc4\xfcC\xc9\xe0j\x98\xbc\xfc\xff\xff\xff\xff\xff\xef?\xc4\xfcC\xc9\xe0j\x98\xbc\xfc\xff\xff\xff\xff\xff\xef?\xc4\xfcC\xc9\xe0j\x98\xbc\xfc\xff\xff\xff\xff\xff\xef?\xc4\xfcC\xc9\xe0j\x98\xbc\xfc\xff\xff\xff\xff\xff\xef?\xc4\xfcC\xc9\xe0j\x98\xbc\xfc\xff\xff\xff\xff\xff\xef?\xc4\xfcC\xc9\xe0j\x98\xbc\xfc\xff\xff\xff\xff\xff\xef?\xc4\xfcC\xc9\xe0j\x98\xbc\xfc\xff\xff\xff\xff\xff\xef?\xc4\xfcC\xc9\xe0j\x98\xbc\xfc\xff\xff\xff\xff\xff\xef?\xc4\xfcC\xc9\xe0j\x98\xbc\xfc\xff\xff\xff\xff\xff\xef?\xc4\xfcC\xc9\xe0j\x98\xbc\xfc\xff\xff\xff\xff\xff\xef?\xc4\xfcC\xc9\xe0j\x98\xbc\xfc\xff\xff\xff\xff\xff\xef?\xc4\xfcC\xc9\xe0j\x98\xbc\xfc\xff\xff\xff\xff\xff\xef?\xc4\xfcC\xc9\xe0j\x98\xbc\xfc\xff\xff\xff\xff\xff\xef?\xc4\xfcC\xc9\xe0j\x98\xbc\xfc\xff\xff\xff\xff\xff\xef?\xc4\xfcC\xc9\xe0j\x98\xbc\xfc\xff\xff\xff\xff\xff\xef?\xc4\xfcC\xc9\xe0j\x98\xbc\xfc\xff\xff\xff\xff\xff\xef?\xc4\xfcC\xc9\xe0j\x98\xbc\xfc\xff\xff\xff\xff\xff\xef?\xc4\xfcC\xc9\xe0j\x98\xbc\xfc\xff\xff\xff\xff\xff\xef?\xc4\xfcC\xc9\xe0j\x98\xbc\xfc\xff\xff\xff\xff\xff\xef?\xc4\xfcC\xc9\xe0j\x98\xbc\xfc\xff\xff\xff\xff\xff\xef?\xc4\xfcC\xc9\xe0j\x98\xbc\xfc\xff\xff\xff\xff\xff\xef?\xc4\xfcC\xc9\xe0j\x98\xbc\xfc\xff\xff\xff\xff\xff\xef?\xc4\xfcC\xc9\xe0j\x98\xbc\xfc\xff\xff\xff\xff\xff\xef?\xc4\xfcC\xc9\xe0j\x98\xbc\xfc\xff\xff\xff\xff\xff\xef?\xc4\xfcC\xc9\xe0j\x98\xbc\xfc\xff\xff\xff\xff\xff\xef?\xc4\xfcC\xc9\xe0j\x98\xbc\xfc\xff\xff\xff\xff\xff\xef?\xc4\xfcC\xc9\xe0j\x98\xbc\xfc\xff\xff\xff\xff\xff\xef?\xc4\xfcC\xc9\xe0j\x98\xbc\xfc\xff\xff\xff\xff\xff\xef?\xc4\xfcC\xc9\xe0j\x98\xbc\xfc\xff\xff\xff\xff\xff\xef?\xc4\xfcC\xc9\xe0j\x98\xbc\xfc\xff\xff\xff\xff\xff\xef?\xc4\xfcC\xc9\xe0j\x98\xbc\xfc\xff\xff\xff\xff\xff\xef?\xc4\xfcC\xc9\xe0j\x98\xbc\xfc\xff\xff\xff\xff\xff\xef?\xc4\xfcC\xc9\xe0j\x98\xbc\xfc\xff\xff\xff\xff\xff\xef?\xc4\xfcC\xc9\xe0j\x98\xbc\xfc\xff\xff\xff\xff\xff\xef?\xc4\xfcC\xc9\xe0j\x98\xbc\xfc\xff\xff\xff\xff\xff\xef?\xc4\xfcC\xc9\xe0j\x98\xbc\xfc\xff\xff\xff\xff\xff\xef?\xc4\xfcC\xc9\xe0j\x98\xbc\xfc\xff\xff\xff\xff\xff\xef?\xc4\xfcC\xc9\xe0j\x98\xbc\xfc\xff\xff\xff\xff\xff\xef?\xc4\xfcC\xc9\xe0j\x98\xbc\xfc\xff\xff\xff\xff\xff\xef?\xc4\xfcC\xc9\xe0j\x98\xbc\xfc\xff\xff\xff\xff\xff\xef?\xc4\xfcC\xc9\xe0j\x98\xbc\xfc\xff\xff\xff\xff\xff\xef?\xc4\xfcC\xc9\xe0j\x98\xbc\xfc\xff\xff\xff\xff\xff\xef?\xc4\xfcC\xc9\xe0j\x98\xbc\xfc\xff\xff\xff\xff\xff\xef?\xc4\xfcC\xc9\xe0j\x98\xbc\xfc\xff\xff\xff\xff\xff\xef?\xc4\xfcC\xc9\xe0j\x98\xbc\xfc\xff\xff\xff\xff\xff\xef?\xc4\xfcC\xc9\xe0j\x98\xbc\xfc\xff\xff\xff\xff\xff\xef?'
p209
tp210
bag2
(g3
(I0
tp211
g5
tp212
Rp213
(I1
(I2
I421
tp214
g12
I01
S'\xc2\xb1\xdaJ{\xf4\x96\xbf3NoX\xb3\xf4\xf0?\xfcw\x93\xc5\x00vh?)\xcdu\x98\xd3f\xef?\x86\xf2\x1cZ\xae\xc6o?\xa5XL\xdb\xd0Q\xf0?\xaf\x81\x8d\xc9\x19\xfc\x83\xbf\x16\xd2\xcd\xa9\x81]\xee?o\x82\xf6\x8c\x18w\x83?\xf0\xe9\x910\x07\xf3\xed?G\xa4\xc9G\xf1\xa9\x8d\xbf\xd5*\xfe\x9e\xd8I\xef?\xd0\xa2\x94\xdd73\x8e?E\xa7\xd4\x05\xb4_\xee?B{\xfa\x03\xaf6\x98?\xbf#\xf4\x83\xd4\xa5\xed?\x02}\xdclk\x1dx\xbfJ\x91\xc2y\x93\x95\xf0?\x02\x8aE\x82\x9e>\x82\xbf\x96uo\xc3`%\xf0?\xc3\xa3a\x17\x17\x1e\x9e?r\xe0&o$\xcc\xeb?+,v\xfe\xfd\xd7\xed\xbeDZZH\xed\xbc\xef?\xe0\xa3\r\xdaD7\xa7\xbfHs\x02\xb1Hx\xf0?\x8b\xc8\xc4\xdb~1\x89?7\xdc\xbeQ\xac\xe2\xef?\xb2o\xd9\x9e\x06VL?,{i\x06k\x07\xef?\x85\xf6\\\xd4\x04\xa4\x8f\xbf\xb4\x02ZJ\x06u\xf0?\xb0~\x89\x85\xfd\x11h?\x0c/C\xeb]\x96\xee?jO\x96\r\xc5\xf3@\xbf\x9c\x95\'\x0cvW\xf0?\xd6\xfd\x10\xf8\x8b,\xaf?\x98j\xd3kvf\xee?\xdaw\xa4c&\xfc\x92\xbf\xef\x98\xd6\xad\x10\xec\xf0?\x8c\xa2zp\x10\x0f\x96\xbf-\x8fN6\x07\x18\xf1?\x84\x00\xd8\xfb3\xf3\x81?t\xf1v\xe93\x9d\xee?\x9f\xcel\xf2 \xeb\xa0\xbf\x8fZ_()\xd2\xf1?\xa3\xb4\xd4\xf8\xad\xe5{\xbfL\xb8\x9a\x13\x12+\xf0?\xf5\xad\x0b\x1eh\xd9\x98?\xd3\x0bj(\xda\xd0\xef?*KC\xd2\xdeo\xa2\xbf\x9fN\x08\xdclq\xf1?Ua,\xa9[r\x9c\xbf\xc2\x13\xa0m\xec\x00\xf1?\xf3\x82\xa2),\xfc\x8a?\x01\xd0\x06\x18\xdf\xfd\xee?\xf6\\\xb7\xc0\xfc\x8es?9\x9dno\x17x\xef?yO\xe1Y\r\xe2\x8b\xbf\x88y9\x96\xb4\xe2\xf0?\xf4\x06\xe4<\x8db\xb3\xbf\x97U\xbde\xfc\xb6\xf3?\x8a\xc3\x8dXC\x0b}\xbf\x90\xe0\xd2\xcf\xd1B\xf0?i\xf7\xe9\xa3\x06\xa7\xa4\xbf\xbcTG\x8e\xf4\x8d\xf0?\xa2\xc8\x88\xaa?lx?&\x00;\xb6<\x96\xee?\xd4B@\xed\xe9\xf4r?\x97}\xdb\xcc\x80\x1d\xf0?N9[\xba\xf1\x92W?\x84\xf1"&U\xde\xee?\x94\xbdG!*\x86f\xbf\xbc\xe4J\x9a\x04\x83\xf0?\xd20+W\xe1\xdf\x83\xbf<j_\x12I\xea\xee?\xde\xdb}\xf0\x95\xa8|\xbf%\x9e\xe0\x13-Z\xf0?i\xc3B\x99\xc1:f\xbf\xd4\x1e\x07\xedQ\xc7\xef?\xbd\x89\xa0\x16oq\x93\xbf\x16\xf9\n\x01F\xee\xf0?\xd2\xa0\xb2\x93\xc5\x1a\xa6\xbf{\x1e;\xefPx\xf1?rD\x88A\xb2\x9eu?\xdf\xed\x1b\xc0,\x11\xee?y\xcc\x9fl1\x1c\x84\xbf\x19*\x02S\xae\x84\xef?\x9f{\xc3Xi+\x95\xbf\x05Rq\xd0\xbc\xee\xf0?\xa67\xbb\xc3\x91\x8b\x94\xbf\x1b\xcfd\xb68\x96\xf1?\xc7%J\x1bQg\xa3?\x8d\xf7\x89Q\x0e\xe8\xed?\xd3i\x947\xdc\xdd\x93\xbf\x86y\xe0\xf8\xdf\x0e\xf0?|\xf2\x8f\x1b\x1e\x91A?TC|\xd5/\xe0\xef?T\xacF\x00\xd5D\xa0\xbf\xa7\x88\xfa=\x99v\xf1?\xf1\xd0\x8a\xa8\xa7LF\xbfH\x0e\nH\x1bA\xef?\xa9j[I\xa0\x8f\xa7?\xa7\\\xed\xa5\x13\x1a\xee?t\x80\xfasZ\xff\x82?\xa8+\xf4.f\xfc\xef?\x7fMG\xd4\x18;\x85?\x9c\xca\xb6\x1cB\xc9\xee?}\xdd-*\xda\xf6\x86?\x9f\x05>O\xbf\xc8\xee?\x8d-y\xc1\x08a\x85\xbf\x1d4h\xc6\xb9C\xf0?A\x98c\x8d\n\x88\xa8\xbfV\xa6\x8d\x0c\'\xf5\xf0?#,oiW\xb0\x88?\xc9\xad\xcc\xf4\x87\xeb\xee?\x11PqkO6\x80?\xde\x13\xfa\x8a\xfa\xbc\xef?c\x87\x19\x19\x9f\x96\x89\xbf\xe2\x1e\x1a\x9d\x8bl\xf0?\xf6\xa6&\xba\xb6K\\?\x84z?\xadkh\xf1?\xb6\xc0-\xaf\xf44\x81\xbf\x1a\xc5\xa1\xce/y\xf0?\xa8\x97\\\x01k\xc4x\xbf\x90\x0c\\\x94\xbaD\xf0?w\xc0o\x19\x94\xe0Y?L\xa6\xb2Q\xd7.\xf0?\x0b\xb8$yD\xc3\x8a\xbf\xd0\x18\xf3\xecb\xaa\xf0?\x9c\xcd(\xedVw\x8d?n`\xfb4N-\xee?\x88\xe3\x9a\xf6\xf1\x8b\x97\xbf;\xb5/\x13\xe8\x90\xf0?\x14\xe6ei\x94Py?\xc3\\\xd6}jV\xef?\x1a\x93\x02\xccH\x0e\x89?\xe0:#\xaf\xb4\x84\xef?\x93UG\x97\xd6\xd1\x97\xbf\xc7\x0e>\xc2\x0e\x10\xf2?PVn\xbe\x8a\xcb\x93?>\xed|Ct\xe1\xed?\xc8\xca\xec\xbf\xef\xc5\x9e\xbf\x0cc\x8a\x11\x8dz\xf1?s+\xd1\xfd\xb1\xc3H?`M\xcd0.\xe9\xef?\rM\x1b+z\x04\x96\xbf\'h\x89\x8c\xa5\xd2\xf0?\xc0`o\xf2\xab\\\x99\xbf\xad\xdd\xdf\xb0\x0c\x11\xf2?\x0b@U\rA\xb2V?U\xcc\xe892\xf6\xef?\x8b\xfb\xaa>Sz\x93?\x89\x0e\xb5\xb7\xe7\xc3\xef?\xd7\x1eg\xa3\xb1\x16\x8a?\x17\x9a\x15\xb7p\x9f\xef?\xd9\xefLw\n\x88\x9f\xbf3\xe4\x8a\xb8E\xe2\xf0?61\xf1pO"e\xbfZ\x01\x1d\xbfWB\xf0?\xd5=\x05f\xf64P?,\xc2\\?wt\xf0?]\xa4\xc1\xcfY\xe6\x91\xbfS8\n(\x04e\xf1?\xf3\'E3\xecc\xa1\xbf\x8a\x05\xcd\xcd\x1c\xc8\xf0?N\xeey\xe7\xa1\xd9u\xbf \x19"\x1a\xb1\x0c\xf0?\xcfl\xbdRv,\xa7?y\xa5\x94\xdc\xe26\xec?\x0fz\x9dJ0I\x87?\x12\x9e_\x85\xfd\x8b\xef?6~\xfaT\xfa\xad\x82\xbf\xac\x9fm\xc1\x08\xc1\xf0?\xf3\xfbF\xd50Kz\xbf\x85\xad\xbe\xaa\xe7;\xf0?\xf2q\r\xa5\x06\x9b\xb7\xbf\xff\x0en\x89v\xba\xf4?nMO\x9c5\xfa\x83\xbf\x81}\x9c$\xb6\xf0\xf0?\xde\x11Cn8I\xa4\xbf\xa0\xcc\x80\x0e\xfb/\xf1?\x8e\xe6\xe1\x9d\xab\x9av\xbf0\xfc\xa6\xf5\x07x\xf0?\xaa\xda,\xcc\xfa\xcbn\xbf\x17\xe1\xd3j\xcf\x17\xf0?\x90\xdd!\x8a\xab\x87\xa4?\xb1\xc4\x89\xd1Q:\xec?\x03?\x91JY\xd2i?\xda\xfa/\xaa\x0f\x1c\xf0?\x01\x02\xeau\xb5\xde\x9d\xbfV\x90lktv\xf1?\xb3\x85<2\xed\x1ew\xbfQ6\x11\xd2\xe2\x1d\xf1?\x03\x1d\xc7\x9e!\xdaq?\xd8\xdaQ\xff\x9f0\xf0?\xdb\x99hzS\x84\x9d?Ho\\\x07@\xf4\xed?\x07\xc0rl\xad,\x95?\xdb\xe9\x9f\xba\xda1\xef?\\\xfe\x8eL\xa8C\x98?\xc1\x99\x9a\xb4\xb73\xef?\x07Flbb\x8d`?\xe6)\x84\xfe\xcc\x8d\xf0?\x15EGBh\xc3U\xbfz"\xf9T\x1c{\xf0?\xf3\xd6\xe4\x1d\xf2\x98\x8a?\xe6\xb2\xe4H\x0e\x9a\xef?@/\xf7r=qd?\xc6d\xdb\xccUf\xef?\t/\xf9>*Bh\xbf\x1c\xbb\xce\x95\xc6X\xef?\x85(d\x06zS\x8b?\xe7\x90\xdf`\x1a\xf5\xee?X\xbf`\x0f\xc9\xa8[\xbf1F\xca\xfe\xb3\x9b\xef?\x11\xf7\xc52w\xb6\xa8\xbfP\xd9d\x9c\x13\xe9\xf1?\x82\x8e\x98\xe8\x01j]?\x95\x00\x10\xd5\xca\x13\xef?\x98W\xcfLM>\xa3\xbf\x80\xe6\xa1\xf0\xcf\xd0\xf1?\x8cG7\xe5\xd9H`\xbf\xac\xed\xbb\x9c[g\xf0?_\xa3\xbb<\x11d\x88\xbf\x08\t\x04\xc4\x85\xe3\xf0?a\xaf\xe3\xa2\xa7\x0c\x83\xbfh\xaeM\xb8l\xd4\xf0?\x00\x9deW\xff\xb3\xa9\xbf\xd7@\x92T\x04\xe8\xf1?\xf6\xd7\xf5\xa9\xdb0\x98\xbf\x9f\x95\xb4B_\x8d\xf0?!%\x01|/M\x96\xbf\x90\xb3\xde\xb4\x0fL\xf1?+te\xeaY\xdet\xbf\xd1[n1Lv\xef?\xad\x91&\xf6\xc3p}\xbf\xfe\x1d\xda\xb1\xd1q\xf0?t\xcc\x94<W\xac\x83?\xe4\xd8^\xe7\xb5\xe7\xef?\xe2\xd0?\xdb-\xe9\x9b\xbf\xb6.\xba+H?\xf0?\xda\x89\'\xf9\x94\xba\x97\xbf\x82\xe2dk\xbd}\xf0?\x98W;\x0b\x85H\xac\xbf\x17\x1b\xd2<\x86;\xf1?-]\xe6*Z9\x8e?\x86>\xd00r\xfc\xee?\xbb$\x8d34\xbc\xa6?\xc6?R\xb1\xbc\xf2\xeb?\x8c1\xeb\x9e\n4\xb0\xbf\xec\xa4%\x1d\xedA\xf3?\x91\xb7\x18+3@\x8e?\x7fk\x93\x8e\xc7\x00\xef?\xba\x90\t\xd1\x7f5\xa2\xbfi\x084\xd0\xa31\xf1?\x0f:\xc6E\x81\xebz\xbf\x7f\xdf\x11\xec\xf3*\xf0?rL\x00.Y `\xbf\xcf\xa4\x94\x1a\\\x87\xf0?%@M\xb5*\xf8x?+X\x0f\x98\xa7\x18\xf0?\x03@\xaa!\xb4"\xa3\xbf\xda.\x17%\\{\xf0?\xb4\xfb\xa6M\x7f\xe9~\xbf\xaf\x89\x04\xc9l\xf4\xef?\xef\xe19\x9c2\x0c\x8b?\x99Z\x1a\xc8\xef\x16\xef?X\xeb\x16\xf4\xdeY\xa4\xbf\x93\xbc\xa8\x1b\xf3\xb3\xf0?\x9dd\x1e6\x12\xa6F?\xfb\xcb\x9d3-"\xf0?\xa1\xac\x8b*q2\xa5?UtC\nT\xc1\xee?|\xef\x1a\x88IG\x99\xbfe\xbd\xe1\xafup\xf0?[\xdc\xcd-\xb6\x12\xa7\xbf\xe0yV\xb6\xf3*\xf2?\xbam+\x80tZ\x99\xbfk\x16\xccd\xf7\x19\xf1?\xbc\xa7\xacttr\x8f?\xa9\'5vZ\xd2\xef?f5\x83\x17\xee\xde\x88\xbf\xae\x11\xe42\xbd\x07\xf0?\xb5\xfe\xf9\x8d\x021\x9b\xbf\xe2\xfc\xad\xd6\x80\x0e\xf1?P\xf4\x85K\tW\x93?\xf1\xdc\xfe\xa5\xf8\x1a\xee?\xa9\xc5\x11S\x8f\xd3x\xbf.\xb2\xa7\x0e}\x8e\xee?\x9d\xc9\xf5U\x17.\xa7?D\xf1\xcdi\xa0I\xed?\xb7A\x07\xed\xf2Y\x8b?e\xa4+\xd1\xcf\\\xee?j\xc1G\xda\x97\x92\x93\xbf#S\xc6\xdc\x8et\xf1?\x881\xba\xab*\x9d\x9a?\xf3\x85\xa4^j\xee\xee?\x9f\x86\x89\x15\xfe2\xa2\xbf%\xa5\\n\xc4C\xf2?=\xb5\xbe\xc8\xa56\x92?\x90\x180\xd3\x0f\xc3\xee?\xef\xd9\xed\\\x1c\xfew?/\xf6\x11\xff/\xb2\xef?u\xea\x13\x81@c\x9e\xbfX\xa4\xd1\xfe\xd4a\xf1?"l{\x90d\x1an?r`\xa9\x0b\xc33\xf0?qs\xd4\xa9Y7\x94?Y\xdaK\xbc\xfc\xf2\xed?\x94\x93\xc9\xaa\xde\xe2\x7f\xbf\xdb\xfd\xccH\x88J\xef?\x89\xab|X\xc4\x8fp\xbf\xf3\xcf\xd6\x92X\xd5\xee?/\xd2\xc6<|\xa3\x9c\xbf\xe7\xb2\x92P\x97\x9f\xf1?Mt0\x8bb;l\xbf\xce\x96\xa0\xce\xf1\x05\xf0?&\x89\x19V\xfeU\x84\xbfL\xc5gy\x81r\xf0?n\xe9"#\xdd]\x86\xbf\xb2H=\xb7\x92\xc8\xf0?\xb8\xbb\xb1ao7\x98\xbf\x91%\xc9\xb1\xef\x81\xf0?\x87\xddK"\xc6f\xba\xbf\xfau\xa8b\xbd\xf5\xf3?\xde\x00\x03(qot?\xea\xcat\x99MV\xef?\x90\xc3\xd0\xb8\\Uq\xbf\x89\xea8\xc0.\xdf\xef?\xca#`M\x8a\xae\x95?s;\xa1\xf3a\n\xef?\x1e9\x0b\x9cQ\x05\xa1\xbffV`S\x97\xac\xf1?\xd0%\xcb\xb5q\x9e\x8d?\r\xb6\x8e\xe2\xcd\xd6\xef?\x04\x86\xc9Q]3?\xbfZ>j\xeb\xef\xdb\xef?\xf3\x1eS\xe3\xf0\xa8t\xbfZ\x046M\x19\xc7\xef?\xfeR\xda\x04o\xbb\x8a\xbf{\t\xc7:d\xad\xf0?\x0eR\xb41\x8ab\x8d\xbf3\x11\x01u\xd65\xf0? J\xbc\xbf\x17x\xa0\xbfu\xf4*\xb9\x8fQ\xf1?\x13\xbe3g\xd2\xcbj\xbf\xa0t\x93\xc3-\xfe\xf0?\x89P]\xc4Q\x12\x9c\xbf\\w\xd9O\xa6\xd6\xf0?\xb1\xcd\xf7`y\xf1{?\xad\xe2\xad\x04\xc2l\xef?\xc2!\xe4\xc4\xff\x8a\xa2\xbf\x7f*ucW\xd6\xf1?\x1e\x7f\xee\x9f\x18\xa2d\xbfV\x1b\xc4\x9f\x9a\x0e\xf0?6Oi^x\x80\xa9\xbf\x91\xdeX>\xed\xf9\xf0?\xa6\xe79\xea\xec\xd5i?\x07\nE\xd1N\xdc\xed?C\x0e\xa6\x12\x0b\xf7g\xbf \xd8{\x15\n\xa0\xf0?\xe8\xb6-k\x83\x1a\x8c\xbf\xe7\xc7A\xaf\xed\x99\xf0?\xf7\x12\x13L6\xd9\x80\xbf\xd4\xa4\xa8PV\xb4\xf0?\xe6V\xfd\x9a4\xc8w?\x0fR\xd4\x02s\x85\xee?^\xbd\xb9\'\xb83U?NA&\xd8[\x06\xf0?\xfd\xda\xf8G\xb2\x96\xa2\xbf\xf2\x82\x16\xe0\xa0H\xf2?v\xac(\xaf\x84\x07\x99\xbf\xefs`\xd1\xdbd\xf0?\xe4\xfc\xeaz\xcc\xbd\x97\xbf\xf6t2\xc7\x1bO\xf0?m&\xc8\xde3\xad\x9a\xbf+@`t\xbb[\xf1?\xa7m&\xcc\x9f\xe2\x80\xbf\xc7\xdaU\x89\xa6|\xef?\xfb\xa2\xe3Fn\xd5\x97?V\xa8DUj@\xef?\x16\x88N\xea\xf2\x1d\xa9\xbf\xc8\x1d\xd2/\x07\x12\xf1?\x0e\x1eo\xc0\xf2\x96\x92?I\xf3ek\xee)\xee?B\x0c\xb2\x1e\x03\xdb\x9f?\x9c\xaf\xf3\xbfI\x93\xec?Z\x13\xbd\x8b0\x9c\x98\xbf\x8f\xa2Z\xa6\xc1,\xf1?k\xd2\xdbh\xb1\xd6\x94?\x04s%\x87\xcd\x1d\xf0?\xe4(\xc9}QX\x89\xbf\xf7\xdb\x04\x92\x15\x06\xf0?\xc8P\xa2\xcf\xcaRw\xbf\xa8@{1\xd4\x14\xee?\xf0!`\xf90\xbfv\xbf8Z\xcbv\xa3\xb5\xee?&\x98\xabP\x00F\x92?BK\x8e\x15\xc7~\xef?\x98\xe6\rP\xfcL\xb0\xbf\x05\x03\x17\xfa\xd9V\xf2?\xea\xeb8S_\xa0\xa5\xbfH\x0c\r:\x99n\xf2?;\xef\xb1p2\xf4\x95?\xa3\xb3]6\xaf\xf9\xef?\xb2\xc4r\x87C2\x9c\xbf\xb7\x1b\xfb\x86\x0b\x18\xf0?,\x98\x99\x1b\x93,\x88?\xaa\x0f\xa4%1\x11\xef?\xec\xe3\xb0\\\xcb\xfes\xbfP\xe2\xc7\x9c\x98C\xf0?0\xe6\x9b1=\xf8\xad\xbf\xc5M\x19Q\x80=\xf1?\xe7c\xa2\xd6\xc8P\x80?U\xe0\xb0\xc7\xb4\x15\xf0?\xd45v\x92\xcf\xbb\xa1\xbfI\\\xd29V^\xf1?i\xc5\xf7\x1fU\x88\x92\xbf5\x8e-Z}U\xf0?/\xafD\xd1\xaeu\x9b\xbf\xcd\xaf*\xeb\x10\xf9\xf0?\xa2\xb8\x81 \xfd\xad\x94\xbf\xe0\x86\x0e\x89\xdf\x01\xf1?\xc5\xcf\xef\x13\xc9\xbc\x94\xbf\xca\x005\x8d&\x0f\xf1?USO\xd7^p{?O\xd3\xac\xe4\xb2\x18\xf0?5\x00\xaaYA\xb2\x8f\xbf\xe6\xe5\xda\x03\xf4\x96\xf0?~-\xd6\x06\'\xa4\x89?\xf9r\x98\xab\x85x\xef?\xb8\x13\xa2\x9f*T\x9e?B\n6N\x18s\xef?%\xa0v\x1c#,\xa2\xbf\xdd\xfa\xcb\xd0\x0c\xf6\xf0?\x94\xbdSS\x15\xcb\x9f\xbf\xc8\xb4n\xdchH\xf1?\xc1\x02\xfcI\xf4\xa2\x85\xbf\xad#\xfe\xad\x96t\xee?\xfd\x06\xa0\xf6T\xb9\x94\xbf\x0f\x18E(\xb1\x94\xf0?\xc3@7\xc93\xf3\x95\xbfN\xc5\xe9\xef\xc7\xef\xf0?\x90 2\xba\xcb\x9c\x89\xbf\xe1\xf7\x86B\x90U\xf0?\x16v?\xd0\xfe\xdb\x98\xbf\xb6o\'\x19\xd6\x1e\xf1?\xec\x1ean\xfb\x8c\x97?A\xdf\x9a\x12B\xa8\xed?\x91\xc0\x02=\x17\xe4\xa2\xbf\x83!\xae_\xc6\xca\xf0?F^\xb8\x8b\xb4\xc3\x7f\xbf\xb3-L7\xf5\x93\xf0?o$\x95\xa38\xacg?\xf8\xfa\xa0\xb0Sf\xef?%y\xc5\x99|\x96\x9c\xbfx\xe8T4x6\xf1?)\r\x1dc\xca\xa4\xa4?\x0b\x99\x00\xbd\x9e\xdd\xee?rG\xc0\xfc\xf7c\xab\xbfz\x96,\xca\xbe\xe0\xf2?\xa1K\xa1\x88\xe9n\xa2\xbf\x00H\x9e7g\x8c\xf0?u*\xc4[!\xcc\x86\xbf\x15\xb6\xdc\xaa\xafV\xf0?\xba\xf1\xe3\xcb\xa8=\xa2\xbf\xfdX0\\\xf0\xb4\xf1?\xbeH\xa5\x8e\xa7\x13\x89\xbf\xef\xc3\x17\xf8oc\xf0?\xd4\xf5MAp\x0b\x87\xbf\xf2@\xc9y\x89&\xf0?\x1fu\x90\xc6L\x81\xa4?\xdc\x18\xc9\x16\xa7\xfa\xea?\x86\xf8\xa4\xe7T\xb6{\xbf\xa3\x97\xc7\x0c\x01\x84\xf0?c\xee\t\x1a?&n\xbfg\\,D\x1d5\xf0?\x84|\x01M\x11p\x7f?T\x85\x10\x8c!7\xf0?\xa4\xed\xbb\xac$h\x9c\xbf\xe2Q3\x94\xa7d\xf0?c0\x05\xe3b>\x84\xbf\xdf\xc33\x80\xdd-\xf0?\xc0\xfbK\xfa\xd3,\x9c\xbf;\xe3\x9eJx\xb3\xf0?\x1dk\xebG\xdc\x8ew\xbf\xaf0Z7\xbd<\xef?\xc0E\x00Y*\x90\xb8\xbf\x06q\x1fPE\xe5\xf3?\xa9\x9c\xbdC\x96=\x8d\xbf\x9fV\xb7\xfb\xbd\x83\xf0?N\xe8-\xd4\x9ecf\xbfk\xddl\xff\xf3\x17\xf0?\xe5F\xec|\xfc\xa6\xab\xbf\xe9\x11\x1f\x88E\x07\xf3?L\xf5\xb1\xcd\x1b\xad\x8c?\x19\xf5e\x1b\x86\x85\xee?k\xbb\xa1\x02\xd3\xce\xa1?=\xf2\xa0\xfe\xc4\x80\xec?\x80\x85\x023N\x98\x9d?\xad\xc0\xcf\xe3\xc1\xb5\xee?\xc6\xd0|A\x0e\x7fZ?\x1a3\xb1\xe2\xff\xec\xf0?).7sw\xac\x91\xbf\x07\x96[\x12<O\xf0?~l\x12\x8a\'\x02\x90?\x1b\xc1\xde\xe3(\xa6\xed?)\x9cb\xbd\x1eL\x8e?F]\xda\xb5I\x10\xef?\xd9\x9e\xb9\x94x\xf9\x95\xbfz\x89}\x02\x07>\xf1?g\xcd\x19\x0b\xa1\xda\x99?n\x9dQ\x0f\xda\x02\xee?\x9eI\xca\xa6h\x16\xae?\xc6\xb2\x9fF\xb4\xca\xea?h[\xe5l\xf4XK\xbf\xb8t\x84\x89\xc0\x04\xf0?\xfem3a\x7f\r\x93\xbf+g\xe0\x19\x8d\xcf\xef?\xf3?\xd7\x92i\x93S?)\xe1\x04\x86q\x03\xf0?\xc3\xcb\xcf;\xfbto\xbf\xdb&\xfb!)\x06\xf0?\x17\tl\xaf\xe8l\x93\xbf\x82\xac\xb0^\xe0M\xf0?9\x18\x84\xae\x93%\x96\xbfd\x9f\xd3\xa1\x0c\x88\xf0?\xe8\xf7\x1aB\x11F\x95?\x1a\xbc\xb5\x1f\x87\xcf\xed?:V\xee\x88\x15\xd1e\xbf\xc31Z\xecHO\xf0?H\xbc\x1dj\x1f2h?Ea\xdf\x00Y\xbf\xef?\x1e\xfe\x1e{\x9a\xb2U?[s\xa8r\xdb#\xef?Hz\x18\xf4\xa2\x08\xa1\xbf\x03\xa8\xdc\xca\x85\x98\xf1?&\x0c\t\xab\xd3s\x91?\xbeX\x90?\x9f\r\xee?\xa8Mg-p\xa5\x97?\x8d\xb2\xb5\xc3N\xc6\xef?\xfeK\xd6vbK+?\rc!\x1e\x9c\xd8\xef?.\x0c\xa9Y\x0bP \xbf\x96o\x18\xeb\xc5^\xef?\xa8\xc9\xd1\xca;(\xab\xbf\x15\xb1\xa17\xfc\xfd\xf0?\x1d\x8dD&Y\xe8w\xbfR\xa3e/k\xb5\xef?\xabY\xc2I\xebr\x85\xbf\xae\x81\xe4\x86\xa4\xd7\xf0?H\x9d\x18\xa8\xd5\xfb\x99\xbf\x1d\x1d\xeec\xeac\xf0?h*\xd9x\xa5\xeb\x94?\xf82M\x15\xef\xa2\xef?\xc9\xc8\xaa\xf1u\x1e\xa4\xbfx?\x1e\x1cH\xea\xf1?\x19\x97\x17\xe9\xfb\x1b\xa1?Dm\x9c`b\xed\xec?xZy\x14\x08\x1d\x97\xbf\x05S\x8f\xd5*\x1d\xf1?\xa8q_\xf0\x14\x13\x9f?\x8f\xd2\x86\xb8\xe1\xe2\xee?R\xcb1qQ\xb4\x87?\xef\xd1\xdc\x18\xf6\xfb\xee?\'3=ul\xf4\x94\xbf3NX+\x9bQ\xf1?\xa6!\xa1\xdd\x90\xb6g\xbf\x9e_\xaa\xcf|;\xf0?\xc4\xab(\xf8l\xa3\x94\xbfu\xde\xb8\xc4\x01\x8b\xf0?%j^\xe6\xac*\x9c\xbfq$4\x99\xb1Z\xf0?{\x9c r\xd8;\x89\xbf&}\\UN*\xef?\x162\xc6h\xd7\xa9\xa6\xbf\x8ar\x08\xe0\x87\x9a\xf1?F,\x828#\xa3z?\x8c$\x9cT\xb0d\xef?\x05\xe6z{\x17:\x95?\x89\xd7%8P\xa3\xee?\x1b\xbd\x86\xf7\x83\xcc\x91?V\x19\xd0."\xba\xef?|\\:\xe4\xd5\x9b\x84?,\xb2\xaf0\x9bP\xef?\xfe\xc7\xfb\xcf\xc76\x90\xbf\xb2s\xb4\x8e\x1b*\xf0?M\xcf#\xdd`%\x94\xbf\x8e\xfdN7bh\xf1?\xcb\x9c\x9a\x81\xbe\xe7\x83\xbf\xe5\xe8\xeb\xa5\x8c\xee\xf0?HI(\xa6\xc7\x14\x8f?\x1dL\xba\x1c\xa5\x85\xef?\xaa\xb1\x9f\xb9^\x00\x90?\xeaege\x9d%\xf0?\x85\xaf\xf2\xe5\xbd\xe2\x86\xbf\xe2vB%\x1b\xa0\xef?\x03\x88\x9a\xbb}\x9c\x89?\x02\x94\x9fv\xa6\n\xf0?\x96\x14\x16\xfa-\x18\x93\xbf3M<s\xa0v\xf0?@\xb9\x89+j\xbb\xa7\xbf\x84\xee\xd8\x90\x14\xa2\xf1?\x18\xde(\xaa\xadN\x97?]\xfe\xb9?\xdeC\xed?\x11sx\x8ah\xc3p\xbf\x8b\xc3\\_\xc4u\xf0?)+4\x94\x11\x1d\x98\xbf\xb5/\xee\xd0g\xa6\xef?\xc8\x19\xb2*\xea\x84\xa8\xbf\xb4\xbd_CL\xfa\xf0?"\xca\xd4\xd7\x14Y\x87\xbf\xbf\xa4\xbe?\xdc\x0e\xf1?xf\xb6E\xac\xad\x8d\xbf\x84\xf0V\xb6zz\xf0?\xbf\x8cto\x8e\xc2_?\xdd(\xbd\xf5\xbfj\xf0?*,Dj\xa2m\x86\xbf\x17\xcc\xa8\xb5>y\xf0?\x9b\x8a\x9d}.0c?\n\xdf\xca]u.\xf0?\n\\\xc4\xf3S i?\xb2\xb1\x11\xa7Q_\xf0?\x17^-\xe6\xff(\x89\xbfl\xb9\xd9\x96\xff\x83\xf0?\xd4\xe5\nY\x9d\x99\xa2?\xd3Ks*\x7f+\xed?H\xf1\x87rA\xceq\xbf6w\x85\xc7\x91,\xf0?\xa9\xd3m\xf3\x9c\xd2\x8e\xbf\x05\x9b\x9d\r*\x10\xf0?\xa5\x87\n\xff#\x91\xa1?\r\x80\xd2\x8bJw\xec?\x9br1(\x80A|\xbf\x8d|\xc3\x0fR\xb5\xef?\x01\xd3\xbd\xf7\xa2|\x80\xbf\xb9<\xe2\xa0\x17\xf2\xef?7t\xeb\x8e\xab?\xa0\xbf\x98\x97\'\xa7i9\xf0?\x18\x95\'\x0cb"\x81?|\xdeQ\x0f\x81y\xee?(\xa7\xd8\'\x91:\x86?\xde,\xd4.\xd4\x0c\xee?\xa1L\x1f\x07G\xac\x84?\xa4zw\x99=\x85\xef?7\x14\xb1\xa7#/\x95\xbf\x1b\xfc\x84S\x11\x16\xf0?i@\xce\x12#`\x8a\xbf\x1f\x9e7\xe8/\xe6\xee?\xa5\x9bc\xa6\xa9>\xa8\xbf\xe1\xa8;\xb5qe\xf2?\x8e\xa0\xa0\xb9\xde\xed\xc4>\xfa\xbe\xbe\xbe\x1b\x0f\xf0?7\xa9\xa4\xe5\x01\x0b\x93\xbf\x91\xb1}\xd7z^\xf1?\xcd\xf8J\xb0\xd0\xd8\x99?G\x10s6=\x15\xef?%W\x11\xea3&\xa2?\xa8\xe0\x8e~D0\xed?\xf8\x88\xe7\xe6\xa5\xd2\xb1\xbf\xd1+6@\xfd\x1a\xf2?\xc1I\xa9W\x9c\x00\x92?7)\x06.\x1c\x99\xed?\xee\x02\xb2]$f\xa6\xbf\xe2\x9b\xc7\xaf\xb3\xa3\xf1?\r\x9d\x06\x9b\xc75\x9b?\xf3\nb@\xf9(\xee?\xfb~\x8a!\x13\xd5j\xbf\xea\x1e\xa3\xe9\x11\xad\xf0?.\x91\xb5\xecx<k?\xb79K\xef[\xd0\xee?\x1d\xc6\x1d\xe0_\x7fs\xbfK\x7ff\xa3X\x87\xf0?\x13Y\xe3\xe3\x19u\xb0?\xeayFc\x18\x1c\xea?\xae\xeb!\xcbR\xb7\x85?k:\xd8\xc0\xea\xd8\xed?\x976!W\xc9\xb3g\xbf\xf1\xa5\x90\xddk\t\xef?#\x8f\xc9\xd3-}\x90\xbfC\x89a\x19i\x1f\xef?\xf0X\x8dm$\xf5\x9d\xbf\x91\xc1\x81,C\xaa\xf0?{\xa3s\x8c\xacC\x8a\xbfQNJ\x1f\x0cK\xef?\x99\xcb\x94\x93\x83\xcb\x83\xbf\x15E~ds\xe1\xf0?N\xb7\x95\x7fR\xff\xa2\xbf\xba\x8d\xa6\x0ee\xe3\xf1?\xb1\x10\x98\xca\xd9\x15\x90?\x00Q\xb1\xff\xec\xb0\xee?\xc8~\n\xfa\xd7C\xab?\xd6\xa01\x84\xd1\xf5\xeb?\xb7\xb6\x8c\xe4\xb6\xb9\x9a\xbf\x18\xcd\x98\xd4V\x1c\xf0?\xb8X\x06\x0b\x7f>\xb0\xbf\x1aP\xed)\xa6F\xf3?\xc9<\xa7M\xc8\xf0\xa0?\xf7;\xe4g\xc3\xa8\xed?\x9ce\x9e\x95"\xcat\xbf\xf8\xc3\xfbzh\xf4\xef?{$\xb4#\xb2\x8b\x94?yE\\\xa3\x93h\xee?\xca\x15\x85\x1e"\xebG\xbf\x9a\x18~\xf2z\xf6\xef?@Y\xf6QK\xe4z\xbf\x17\xfe\xdf\xed\x7f\xc7\xf0?\xe6\xc9D+p\xc8\xa3?\xbcM\xa7\xb97\x97\xed?\xa1\xcb\nZ\x00g\x83??SFh(\xd0\xee?x\nz\x08\x95R\xa3?\x12\x94\xe21T&\xec??\xf5/\xb4\xba\x8cq?\x931\x86\x90OI\xf0?\xcd>\x8a\xb41a\x80\xbf\xbc\xbe%\xca\x1c\xd4\xf0?\x14\x04%\xd6\xa0\x0c\x94\xbf\xcf\xaac\x96\xc9\x96\xf0?-\xf2I\xd3?\x1fy\xbf\xa9\x1en\x92\x9aL\xf0?\x80w\x04\xaf|]K?\x0e\x02\x19\xc0\xdf\x0b\xf0?\xc9\x83<3Y\xb0\xb5\xbf\x06\xa8r\xa6\xe6`\xf1?\xf49\xf3\xf9[d\x8e\xbf\xb4h\xef\x91\xbaV\xf0?\x06zRd&7\x9e\xbfY\xf0\xdc\xd3\xc7\xf3\xf0?!\x92\x17#\xed\x05<?\xc8\x01\x0e\xeb\xae\x17\xf0?Fat\xd7\xc6\xc2\x93\xbf@\xb61?\x91\xd5\xf0?\xae\\\x07|\xc08\x86?\xb6\xb0y/\x01\x08\xef?\x02\x07a9X<\x8d\xbf\x89l\x05\xf4&\xc4\xf0?6\xac\x9d\xabtK\x98\xbfJ1\xa35\x0e\xce\xf1?O\x88?\xca\xb6@\x8d\xbf\x03\xa1\x0c3^,\xf0?Ty\xc4\xa8\xd9\xa5\xa6\xbf/6\xc5\xf7\xd2\x83\xf1?\xab\x8b\x02$\xc7^\x86\xbfF9\xd4\x86\xb3!\xf0?\xdct.K\xc6Q\x83?K\xc4\x14\xddm~\xee?\x06\xf4\x80\xae\xee\x13\xa5\xbfM\xe2G\x1fTd\xf0?\xe7}\xddp\x14\xba0\xbf\xf8\xa1\xd6 $\xb3\xf0?\xe4\x10}\xa0\x11\xa6\x96?\x19o\xab\x1a(\x0e\xed?\xf2c\xfb\xf5~g\xa9\xbf\xce8\xb4\xaf\x845\xf1?\xec\xba2\x1bK\xaa\x91\xbf~\xf5\x8c\x9b\x96o\xf0?\x828x\x11\x9dB\x82\xbf\x0e\xcaR\x1f)k\xf0?\xadC\xecr\xefdc?!\xae\xc5u/\xa9\xf0?;\x06\'\xfb\xa1\xc5\xa1\xbfU\xff\x02f2\xf9\xf0? \x07\xee\xb7OjJ\xbf\x1a\xf9>\xd7z~\xf0?ZL\x10\xd0\xec\xd9\x97?r$MH\xec\x98\xef?\x1a\xf5\x98[\xec^\x94\xbf+\xc2\x86C\x1e\xcb\xf0?\xf6\x82\xb2\xdc\xc0\xda\x87?\x90\x04h\x0e\xc53\xef?\xd3cl\x83V\xc8\xa1\xbf\xd4\xbf\x19d\xf5Q\xf1?uM\x1d&\xd3~\xad\xbf\x1c\x89\x80\x95\xe1\xdc\xf1?G4%1D\xea\x87?\xdf \xb7\xe9\xbfh\xf0?\x81\xeb\x1dG\xa3+\xa3\xbf\xbb\xf7\xc0\xa6\xa5l\xf0?\xeaSg\x13X\x18\xa4\xbfN\x89`Sy\xc5\xf0?\xd9c\xedk\xc6l\x90\xbfT\x99[\xea"\xff\xf0?\xd2\x16x\x8c\xfe\x11\xa5\xbf\xc8\xb9B\x1d.y\xf1?Iz\xfe\x08]\xb9q\xbfOY\x03y\x12K\xf0?\xdf\xd0d1IB\x19?\xb7\x15h\x10S\xb9\xf0?\x07w[\xb7\x9f\xd1\x87?Ev\xe0G\xfe\xc4\xed?\x98\xd5r\xb8Cu\x97\xbf\xa1I\xfd\xadq\x8b\xf1?\xea\xd998\xdfn\xb4\xbf\xf198\xa1\x03\x85\xf3?\x14\x85\xcd\xa1\xbf\x11\xab?\xe0\x81\xe0\xbc\x14\x84\xed?z\xf0T\x06|?\x91\xbf\r\xe3O\x12)}\xf0?\x12Q\xb8\x1c$%\xa6\xbf\x80\rM\xda/\xb5\xf0?7\x80\xb3\xff\xaa"\xa4\xbfm\xdd\xb0T\xeb\xba\xf1?\xc5mb(\x005\x90\xbf\x11Q\xe0\xdf\xd5#\xf0?W\xd6z\xf3\xa9\x0e\x88\xbf\xf2Q\xdbl\xb9\xe1\xf0?`+\x88\x1f\xd9\xf7k?\x10\xc7\x02\xe0\x14k\xef?Y\xff\xec\xbc}\x8c\x9a?"+(X\xb3\xd7\xed?f\xab\x9a\x95\x8d7\x92?\x1b\xc4\x87\xe90Y\xee?\xf0\x1f>O8\xbb\xa5\xbf\x97\xad}\xa5\x0c\xda\xf1?\xcb\xb4\xdd\x1f\x15\x8a\xa0?\xe0\xb5\x02\xb7S\xcf\xed?\xe1\r\x1b\xccj\x91\xa0\xbf\x84z\xd5\xce\xfd`\xf1?\x871L\xce\x9fy\x91?K\xf6_\xa3\x15\xe9\xee?nY\xf1\x83N\xf4o?\xee\xad\xf0\xdd\x03\xc4\xef?p4\xc90#\x18c?\xa3\xc15\xf1\xe5\x07\xf0?\x96if|O~[\xbf\x965\xc6\xb2\x9a\xef\xee?\x13\x97\xcck8JY?\x08\x1ez\xd4$\xdf\xef?7\n\x8b!\x00\xe4\x86\xbfl\xb77O\x17<\xf0?\x80\xd8\x19\xd3\xb9N\x94\xbf\nm\xb4t\xc9\x04\xf1?\xdd\x94$\x12\xd5#\xa6\xbfM\x9c\xf3kq\xad\xf2?Aj4\x19?f"\xbf\xa3\xe5\x03_;\xd0\xef?\xca\xd3\xb3B\xcfR\x93?\x88\x98\xa1\xfa\xb5\xd6\xef?\x82MT\xf1\xbc\xa6\x90\xbf\x01\x004_\xf8B\xf1?'
p215
tp216
bag2
(g3
(I0
tp217
g5
tp218
Rp219
(I1
(I2
I438
tp220
g12
I01
S'\xae\xca\x89dD\xe5\xa6\xbf\xdd\xe1\x04\x8f\xab\xfd\xef?2\x11\xd1\xc3Y\x85\xa7?\xe4\xcd\xdb\xf5\xe6\xac\xe8?\xc7\xdft\xa6>\xf6\xbc\xbf\x8at>\xa4\xb8\xd1\xf0?]7it\xf69\xd8\xbf\xf2\x8aX\xb6\xe0$\xff?\x10Y\x19\x13\xe6`\x95\xbfwA\x8fT\xe5T\xf0?3D\x86\x083fo\xbf\xe2B\x82\x96>0\xeb?\xc0\xe9oC\x99g\xa0\xbf\xab\xa8\x17\x7f\x98\x82\xf1?\x93\xdb\xb0\xe2\xb3w\x98\xbf\x1ey*\x99\xe7N\xf2?5\xe4\xd8\xa5\xbc\x90\xa4\xbfM\xd5\x07M\x91V\xf0?\xfaT\x91\xc7\xe5\xc3\xc1\xbf(\x9d!\xf5\xac8\xf6?%\xb9\x98\x00\xe9\xe7\xb9\xbfN\x9d\xf8\xf7-Q\xf1?v\xef\x95\xe2\xec\xc5\xb6?\x83\xdc\x04\x1f1\xf0\xf2?\xd5\x1e\xcb\xec)Q\xb9\xbf\x93|W\xba\x83\xbd\xf3?\xccXl-8+\xa3\xbf\x05\x82\x9e\xc6\x1c\x8b\xf0?\xad\xc4\xd4\x01\xac\xa7\xc3\xbf)wZ\x88\xa4\xf0\xf4?\xe2<\x0b\xe0{\x1c\xb3\xbf\x00+>_a\x1e\xf4?l\x93D\xb0\'j\x8d?\xf3V\x11\xbd\x0e\xbb\xed?\x07\x17\xe4\xa0\x8b\x16\xb3\xbfr\x8e\x1e\x89\xd8!\xf0? \r\xdc\xa1\xe7K\x90\xbfHVc\x15\x14\x03\xf1?).\xa5F\x13p\x88\xbfu\x95]S\x82\x1b\xf0?O\xcbQoX{\x9e\xbfD\xb1\xbd&4I\xf1?\x16;QM\xb6\xa3\x86?\xb4\xc2\xd8\xe0:9\xeb?k\x1f\xcb\xb5i\xc8\xc5\xbfp\x92\x87\x84\x01j\xf5?(\xb5M\x1006\xb0\xbf\xba\x13\x93\xe8\xb2\xad\xf3?\x8b\x86(\xf7\xfc\xcc\x9f?\x96\x04W\xf4\xf2v\xec?\xbc\x83d|\x8e\x83\x87?\x94\xabmX\xcf+\xee?@\x1el8`\\\x9f\xbf\xc5X}\xd8O>\xf3?d\x89jg\x15\x91\xb0?\x15\xd7\xe1\x0fr7\xe8?-\xe3\xc9\x0c\xbf\x04\x8a?%\xc5\x83P\x05\x95\xee?a\xbdR\xdf\x91\xcf\xa8\xbf\xe5\xf7\xf2\xa2\x06\xfa\xec?\x8aa\xdbV}~\xa3\xbf\xe2\x1f\\\xa8\xae\x8f\xf1?\x10L\x14\xa4\xe9\xb7\x8b?\xd8\xb8\xa47\x8b\xa4\xed?\xdb\xd7\x89\x9aIT\xad\xbf\xb0\x9a\xa6\x88\xd1\xb3\xed?q\xeb}[#[\xb7?\xc9\x13\x1aw\xdfa\xe4?\x8aKc\xc0{\x85\x96\xbf\xd3(\x069/@\xf1?\xa4\xd4\x94<\xa2\xa6\x80\xbf\xdeN\x88\xbb\x98\x08\xf0?\xf2x^\x88\x18d\x7f?\'d\x89\xaaS\xfa\xf0?\xb0\xf3\x00\xf0\x16\xf5\xac\xbfW\x95KoW\xee\xf0?W|\r\xdcB\xee\x93?\xe2\xa6q\x13\xc7m\xeb?s\x15Y\x8c\x8a%\xae?)u\x05\xafD\xd3\xeb?\x9bj\x9d5\r\xaa\xaa\xbf\x1cM\xb5\xc6\xa4\xcf\xf1?\xa1\xbdf}\xd8/\x95?\xec\x0fO\xc5\x04F\xf1?Ky3)\xbcb\x8c\xbf\xec\xe5C\x7f|\xd1\xef?DbZ\x04\'_\xa5\xbfv\x9d:\ri*\xed?\x92\xac\xa1\xd8\xd7z\xa1\xbfp.n\n\xfe\xe5\xf1?]\x9b%\xc3\x1d\xb9\xab\xbf8FU"\xf7\x19\xf1?dl@k\x8b0\xbc?\x18\xdf\x82\x00Y\xb3\xee?=K^\x97\x1bs\x81?\xca\xd7\xf8i\x90\x1e\xec?\xb5\xeb\t\xfbPm\xb3\xbf\xcf\xe24#qN\xf1?\x1d\xad\x02\xe9\xc2\x11{?\xc5\xb0\xbbV__\xed?.\x9a\x89\xe1D\xee\x92?\x9cz\xf7\xfc\x89\xb9\xec?\xa0\x0b)D\x17\xef\xb3?\xf7B\xeaN*\xb4\xee?\xbf\xcc!4\xd9\xb5\xbc?\x911\xb8\xb6U\x04\xe6?\x03\x93\xde<:\np?\x16\xe0X\x08\x19\x97\xed?^\x11w\x00Q4\xba\xbf\x8c\xb6\x02\xdb%\xc2\xef?\xdb\x8a \x8c\xd1\xf5\xa5\xbf\xce\xffD\xe9\x0c\xe3\xef?Eo\x94\x04p&\xa7\xbf\x1b\n`>tj\xf0?jk\x07"N\xb5\xb4\xbfS\xa3\xb2\xccD\x7f\xf0?\xc3\x11;N\x12\xb7\xa8?\xf3n>\xe6\x0e\xec\xf0?\xf9\x0b^\xed\xb0\xd9\x9f?\x7f\x07\xb2\x94A8\xe7?\xde\xfa5`3\xca\xb2\xbfnJ3&\xa7r\xef?\x9b\xf0\xac\x7f\xbdD\xb0?%k\x9f\xd7\xc0\x9c\xeb?g1\xc4\xc0\xd6n\xb2\xbf-e\x02\x94b\xa7\xf0?\xa55\x81\x82O8\xa3\xbfK\x8b/\xf7\x91\xcd\xef?1\x1e\r\xf5\xb1\x14[\xbf\x14\x84\x9d\x81\x01\x9f\xf1?9,D\xb4\xe1\xce\xae\xbf\xaf\xf1M5\x1f\xcc\xf0?\xa0\x98\xae\xcb\x04\x88\x93?\xe6\xd7\x8b\xd7kr\xee?\xe9\xd1_y(\\c\xbf\xfa\x1d\xa9?\xb7B\xee?\x07\x9e\x19O(\xbb\xbb\xbf>\xfa\n\x1fo\x11\xf1?\xfe_6}!:z?\x98\xe1\xee&X\x95\xed?\xe1\xe4\x1b\x91p\x8e\x91?\xad\x93\x93A\xcc)\xef?\xb8\n\x8f\x0f\x86\xb8\xae\xbf\xd9\x07.\xe5\x19_\xf2?\x83\xc0\xfcb\xa1.V\xbf3z\xab\xae\xb9P\xf1?\xcd\xa8\x88:\xea\xd7\x98\xbf2t\xce\xc4\xd8\x06\xf1?\xa4V\xf1\x88\xb6\xc9\xc2\xbfx\xc2\xcf?%\xfc\xf2?\x08\xd4\x08(X\x04\x8e\xbf\xd4\xb4\x1e\xe9\x8c=\xf0?\xa0(\xc4_)\x91\xc3\xbfCB\t\xf6\xae$\xf5?G\x85\xf5\xa0u\x91\xd2?\xbc\xafM\x84j\xa7\xe0?8M\xd9\x1f\xa6E\x95\xbf\xa1\xee\xce\xb4\xc8\xca\xf0?C4\xdb\x96\x0c\x1e\x8e\xbfG4)O\xc9\xf3\xef?r\xcb\x89|\r\x7f\x9c?\xb4Od\xdf\x85\xd2\xea?h\x7f\\\xc4\xf1J\xb1\xbf\xca\xdc\xd1M\x97V\xf3?\x94+\x8fgB@\xcb\xbfvz\x1e\xb2\xd4+\xfa?~\xc7\xb2\x98|{\xc1\xbf\xd5\xdd\x8d\xf4\x858\xf3?+[\xfa\x1aB\x8a\xab?fH\xeb\xff\x06k\xec?\xd4\xae)Z\xf9K\x98\xbf\xe1+\xff\x005\x80\xed?\xd8\xbdb\x02O\xdd\xa4\xbf\x81\x1ee\x18\x0f\xff\xef?\xea\x91\xb6\x07\x07\x1c\x81\xbf\xfc\xa8:\x00\x88y\xf0?\x13\xf9\x12\xca\xccW\xd0\xbf\x91\x8e\xc2\'\xd5\xe7\xf7?\xbe\xec2\x85<\x8d\xa7\xbf!\x02)o\xf1m\xee?\x94\x83`Q\xea\x16\xb4?o\x1d\xd1\x03+K\xea?\x9a\xb0\xf8\xac\xf4\xc8\xdc\xbf\xfd\xd5\xd1\xd1\x1cN\x03@\xec!\xe6\xeeP\t\x89\xbf2\x8f\x08\xdc\xe2z\xef?\xd9\x08]\x1a\x7f\x91\xc3\xbf\xfb}Ua\x18\x03\xf2?\xca\xc2}#:\xcf\x82\xbf7]\xef\xa9\xc7\x1a\xf0?#6\xd05=\x89\xa8?\x9e\x87\xaf7\xd2\xf8\xed?;1\xdcM\x87\x9e\xad\xbfW\x8f\xb5r\x939\xf4?\xf4\x04\xe4\xf3v\xe4\xab\xbfr\xaa"\xbd\xb2\x8a\xf1?\xef\xef\xd1\xeeg\xb1\xac\xbf\xf9T\xf1\xf5n\xf4\xf2?\xdd\xda\xdbn\xc3\xf8\x8e\xbf\x0eG\xa6\xa3\xe4\xf3\xef?\x00\x8f\xf2\xb8O\'\xa1\xbfj\xbdi \x88R\xed?H\x10\x1e\xf6\xb5z\x96\xbf\x18\x1c\xa9d\x10+\xeb?2\x84w\xff\x11l\xa3\xbf\xcb\x93Hm\xef\x8f\xf1?\x187\xad\x17\xd2\xf1\x88\xbf\xa0\xb60\xbc\xe8|\xf0?\xf5\xd3\xd74a\xb1\xc5\xbf\xa5p\x04.\xaa8\xf7?\x0f\x1a\x03V\x00F\xb2\xbf\x03xq\x80+\x01\xf4?[\xfa_1v\xb5\xae?{\x03\x12]\xa9x\xea?(g\x9b{V\xcd\xc1\xbf\x1e\xe9\xce\x03Q\x84\xf3?\xe48\xcd\xd7\xa4\xcc\x85\xbfZ\x8f\xf8\xbd%\xfb\xef?=\xd4\xbf\xbe$\x08\xbe\xbf\xf0\x86\xf3\x93\x93\x9e\xf3?\xf4\xf9\x85\xd5\x92\xca\xc0\xbf\'\xf3V_\xd3Q\xf5?\xf5\xf4\xfa\x06(@\xb1\xbf6#Z\xae\xb7\x0e\xf1?\x04\xa1(\xc4\xdby\x81?\x12\xc5L\xb6\xb4\x07\xee?Fb\xfd3}\xc4\xa9\xbf\x08h@\xee\xa2\n\xed?g\x9dR\xb9\xfc\x86\xaf\xbf\xf9(Q\x7f-J\xf0?D\x15ZCC\x89\xb7\xbf{@\n8%\xc0\xf2?z\x13\xcf\xc4\xfcTi\xbf\xce\x1f^\x04\xa8]\xef?%j\xca\xf3rt\xa2?\xc2\'\xec\x82\x00\xa4\xe7?\x1cQ\xbfp\x84\xe5\xc0\xbf0[=\x1c\xb4O\xf4?H-\x92\xfc\xf0\x03\xa9\xbfW\x96p\xc4\n\x04\xf2?\x93\xa6\x82\xcb\x8e\x00\xa6?\x15\x05\xf2\xc90\x1e\xef?\xc9\xe4\xc8G\xee\xd27?\x06\xf8\xfd\xa4\xff\xbf\xf0?\x07]{\x8b\xe5n\xb3\xbf\xa5\xac\xf5\x9e\xae\x8d\xef?\x0f\x8f\x86\x86\xdc\xbf\xa2\xbf\xff\x93\xb6\x02}\x95\xef?\x0b\x0c\xa2i\xac\x83\xbe\xbf}\n\x9f\xacx\xfa\xf1?\x94&\xe3A\x7f\x07\xa0\xbfG\x89=\x9f\xed%\xf1?@Q\x92\x88\x1f\xc3\xaa? ,\xdf~\xf9\xbc\xe6?$\x1b}N\xacO\x85\xbf\x82\x9c\xa7\xe2r3\xf1?\x03\xbe\xce\x9b\x1d\t\x90?v\x8d\xa7df\xa2\xee?y;`v\xf6P\xb5?\xf3\x13\xed\xdcA\xb7\xe2?\xb3\xb6o`I\xc7\x9c?\xeeqY\xd4\x94I\xee?o\xd5\xf5\xa4\xaf\xfb\xb6\xbf2\xddP\x16&\x1d\xf3?\x1c\xa5\xc3-@t\xae\xbf/\x0f\xe5[;@\xf1?|\x98_\xd8\x0c\x9f\xb3\xbf6\x0fA/\x92\xd0\xf0?\xf6\xeb\xbb\x156*v\xbf\nc*0\x14\xf0\xed?\x19\x08h\xfb\x0b6\xa0\xbf\xb6-K\xcc{\x96\xf1?|\xd8\xa9\x81\x96w\x1c\xbf.\xd2$,:\xb3\xea?M\xe9\xd0\xc9\x92\xd7\xa3\xbfyZ\t\x10\xbb\x00\xf1?\x9e\xadB\x1a\x1e\xcdk?\x051a\xb8\xa0P\xf0?E\x16M\xe4\xd5\xe7\xc2\xbf\xe1\xd7\xa4\x83\xa2\xf0\xf4?\xc8\x85\x12;\xdb+\xb2?P\x9e\x92d~J\xf1?\xa4\xfcb\xf1f\xa4\xb0?\xbf\xd0\x15\x01\xaf\x8f\xe6?\xee\xa5G\x0eoH\xa2?\xa6`b\xc9x\xb5\xed?\x81\xb0\xfd\xa0\xdf\xfb\x9a\xbf\x8a\xbd\t\x17c\xce\xec?\xc6{\xc1E\xac\xc1\xa5?s\xba\xf8\xfa\xf8a\xea?x\xbc\xc9\t\xcc\x80\xaf\xbf\xb5[D\xa1\x8a\xf1\xf0?\'-\xaaI\x00?\x85\xbf\xbb\x8eE\x99EK\xf1?\xbdS\xf5\xc4z\xf5u\xbf\x10\xd5\xd6odV\xf0?+y\xb3k\x83\xa6\x99\xbf\xee^L/qS\xec?q\x93\xeas\xab\\\xa6?YS\xf0\xf3\x92\x91\xe8?\x9f\xbe\\\x06_\x8e\x95\xbf\x1b\xed\tA\x04\xca\xf2?rc\x99\x19\x14\x95\xbf\xbfy66\x04ed\xf0?L\\,\x88\x1f7\xc4\xbf&\xbf\x99g\x91@\xf5?\x15\xa9\x87\xa9\x16S\xc7\xbf\xf8\xe6\x01]\xbf\xbb\xf6?\xc9lO\x12&\xe8\xab?\x93F4\x1c\xaf\x9c\xf1?_V\x04s\x93\xe6\xb1\xbf\xa8wPo\xb7\x9c\xf2?\xf84\xd5a\x9b\xb3\xa8\xbf\x08T\xf0y\x12\xcc\xf0?\x10i2\x82l0\xa2\xbf\xbc\xe3\x99G\xf7\x15\xf1?4|8\xf5q\x11\xaf?\x94Q=0t#\xec?m\xa2A\x85b\xdc\xba?\xd9\x8f\x93\xebR^\xe3?Ar\xe6f\xacT\x9e?\xe4D\x89\xb86<\xeb?\x9enQj\x14\xe2\xc0\xbfe\x950\xd6Y\xaa\xf2?@\xa1\xb1\xe0\xe1\xc9\x85?h\xff\xba\xcd\xa5O\xee?P\x8d\x89\x85\x82\x08\xa3?8\xe9+\x16\xf9p\xec?\xf9D\xfb\xe7\xa1>\x9d\xbfp \xfc\xa1\x92\xb7\xf0?\xce\'\x0e6A\xde\xc7\xbf%\xba\xb2\r<\xc3\xf4?9\x91-w\xdd%\xa2?\xad\xa1\xad\x18\x82\xe2\xe9?\xb9\xfaN\x85\xd8j\x8a\xbf\xeb\x05G\x10\xab\x82\xed?fs.d\x8e\xe6v\xbf("|\xf9x\xb2\xef?\xf5F\x8b\x17\x04&\xa0\xbf\xe0\x97\n\xea\x9ax\xef?b\x07\xbf\xc9<\n\xb2?\x06PR\xd6\x8eP\xe8?\xc9\x8d\xc65@\x0f\x84?\x0c\xb6\xd4\xd5\x17\xfe\xeb?\xf1\x98\x8b2t\xb3\xce\xbf\xc3.8\x17\x8eb\xf8?\x85\x11>5\xf5\x05\xbc\xbfl|\x0b\xed\x92\x8f\xf3?\x82\x13\xd4W6\xc2\xd5?\xae\xe3#y\x82\xf5\xe7?\ny\xc7\xe4\xd7<\x80\xbfo.\xe4\xef\xa5\xb3\xee?`WH9\xf4+\xf4\xbf\xe0\x84\xa5\xf1\x15\xb3\x13@HJLJ\x01\x85q\xbf\xc43\xe6\xb1Ub\xf0??w##7\\\xab?N\xbe{^]\x06\xea?%\xc1\xfe\xd5\x06Tf\xbf\xad\x80\xa0Wl\xb1\xed?\xae\xeb5+\xfb_\x93?\xba\x15~$%\xe3\xef?\x8d\x9eQy\xc6\x04\xb7\xbf\xcb\x8eV\xbb\xb4\'\xf1?\xf61`\x16\xf1(\x93\xbfm\xcc\xb7\xa8\xd7\x15\xef?\xcb\x08\x10F\xb4;\xa8\xbfq5\xc0.\x86\x0f\xf2?\xa1\x9a\xa4\xda\x15n\xa3?\x05?\x90\xdd\xea\xf0\xf1?\x969\x8d\xba\x1b\xc1\xa1\xbfXK\xcb\x98\xaf~\xed?\x8b(\x05^\xa8\xcci?\xf5\xdc\x13\xc2\xf3\x99\xf0?H4l\x87m.\xba\xbf{\xc9\xcd\x05h\x8d\xf2?\xc8\x18\x98\xb27\xf8\xb5\xbf\xfc\x88d3\xa1\xfa\xf2?\x8d\xcb\xb3\xc9H2\x88\xbf\x89 \x08\xc3\x8e\xb1\xee?\xeaG(\xc5\xde\xef\xb9\xbf\x85\x9a\x12\x00\xa3\xd6\xf3?B6t:\xca\xf6\x9c\xbfH9g\x12\x14\x01\xf1?\x96"4\x02\xb1~\x8c?\xae\xa2\xee\x89\xfc0\xe5?H\x91\x85.y>\x98\xbf>/\xe7\xc1\x11a\xf0?\x8b\xbf\x9e\xe4\xe4\x03\xc3\xbf\xd6\x17\xee\'\x91I\xf1?\xb3\x8e\xe9\xe6\xfa\xd4\xbf\xbf^\x83\xab\xd6\xe6\xa2\xf1?\xe0G_t\x1d\xf0r\xbf\n<\xbc\x16\xbdt\xe8?\x83g\x8b*.Od\xbf\x17i\xa2\xa2\xb3t\xef?W{\x06\xe4\xcal\x80\xbf\x93\xcc\xb5T`\x05\xef?\x97\x1fa\x88\xa8\x8b\x83\xbfA{\xf56\x0b\xce\xf0?\xeb\x03\xa2}\xbd\xd0\xa6\xbfW\x83\xfa9l<\xef?\x1b\x92\x03+X\x9f\xae\xbf\xdcgb\xb5\x1a+\xf0?y\xfb\xa6\x13\xf8<\x97?\x1a\xb6\xc8/\xb2\xcf\xec?\xac\xaf\x808\x0b\xab\x9c?E\xe1Jgs\x8c\xed?\xf0V\x94\xf5\x18\xa4\xb2?a\xb7\x0c\xd6\x08\xf1\xe5?Y\xd9\xfb\x98\x91\xc3\xb5?\xee\xf7\xa6\xa1\x9c\x96\xea?{)\x9f>\x91\x03\x94\xbf\x82\x1d\xcapya\xf1?K\xcc\'\xe4\xa9\xb3\xba\xbf\x1f\xec9\xe7\xec\xb8\xf4?\xf5\x12"\xb4\x93 \x99\xbf1\x90\xa0\t@a\xef?\xc3\xef\x98\xbcB@^?\xa8\x02\xea\xf1*\x1c\xeb?j\xacG8%\x96\xb6?\xc5\x03\xb0\t`.\xe9?\x91\xe8\x1a\x0b:\xc9\xaf\xbf[\xfd\x0f\xdec\x8f\xf1?\xa4\x0cCs\x87X\xce\xbf~\xdc\xfb\xde\x1a\xb6\xf4?\x81\x0c\x11\x9d\xf6$\xab?\xa8L\xd7\x16&\xce\xec?|\xf8mJHU\xbe\xbf\xbb\t\xda\x0eJ\xcf\xf4?:\xbb\xbe\x8b\xcc\x1cT\xbf\xf5\xf1\xd0,\xe9\x02\xf1?\xbb\xdc\xd8J\x8eq\xa7\xbfqku\xd1d\xe9\xf3?|\xbf\xc1U\x13(\xa2\xbf@\xa1D0XS\xec?\xb9\x15^^\x88\x8b\xe3\xbf\xb3\x81\x10\x14\xaa\xc0\x06@\xc3\x0f\x98\x9d\xd5\x02q\xbf\xa0\xfd\xbd\x06\xb66\xf1?s\x06\x88P\x10R{\xbf]z/b/\'\xf0?\xfc\xc9\xba\xa6h\xb5\x95?m\x0b\xd3\xfe\xc4s\xec?G\xc8M\x8f6\x02\x99\xbf\xf4\xde\xf2\xe3w\x17\xf0?\x82\x9f\\\xba(\xaf\x92?H l\xc7\xbbQ\xf0?\xea\x1cl\x11i\xf6\xc1\xbf\x16\xaf\xc9\xb2\xf7~\xf3?dl#\xaau#\xa4\xbf)\x9f"\xc5\xaf\x93\xf0?\xb9\xb5\x88\x9d3\x9e\xbd\xbf\xd2\x1c\x14\xf5\xfa\xfc\xf5?\xc2\x99O\x96\x90z\x8a\xbf\xa3\xf77\x1e\xdf\xb1\xef?\x15f\xffh\xf7\xcb\x94\xbf\x1f\xeb@Y\xf8\xa2\xef?fYe\x1d2\xb6\xb1\xbf\xda\x1e\xf3r\xd7}\xf3?\x01\xe6T\xf8\xf5\x7f\xa4\xbfQ\t\xb5\xcb\xef\x13\xf1?M\xea\x8d\xca\xeeW\xa1\xbf\xdb\xc3bC\xff\x93\xf0?\xaa\xa0M{9H\x91?f\x06\x0f\xc0sU\xee?\xea"\x9e\xff\x83\xdc`?i\xa0\xe5\xfb\x1b\x98\xec?\xdd\xebVGN\x9e\xb4\xbf\x1dx[KRn\xf1?\xdb\xa2\x04\xfbS\xfe\x7f\xbf\xef\x06>\x9a\xdcz\xef?\xd5\x0b\x88\xed+\xf7\x82\xbfN\x8f\xbbm\x0c\xab\xee?tn\xe8\x81\x9d\xf9\xcd\xbf;\x1e\xd3\xd7\x14\xa4\xf9?l\xe4\xcd\x1b\xca\x18q\xbf\x94\xd1T\x89\xb8\xcf\xf0?\x8a\xb0\x84\x1dL\xd3\xab?\xfef\xd3JP\x0b\xe9?\xf1\xe3\xa1XY\x9c\xbd\xbf\xdf\xec\x19\x8b\t\xed\xf3?\xaa\x07\x9d\xfb\x03H\xb4?I\x86\xa4\xf5\xe2\xf3\xe9?\xfe\x85/}\xdfS\x90\xbf\x8f\x8a\x0e/}\xd1\xf0?g\\a\xdf14\x9a\xbf\xf469\xc9\xe8!\xf1?z\xd4\x96-\xbd!\xac?\x84\x1e\x98L\xa8\xc4\xec?\x03\xd4\x87^\x0eH\xa7?\xee\xcd\xb6O9\xf1\xeb?\x8fv\xf2\x80\xe64\xa8\xbf\xd8\xb2\xa8\x19\x1bx\xef?6B\xc7{\xe7Y\x83\xbf\xde4\xcb2\x8c\xfb\xef?\x12"h;\x7fc\xc4\xbf@\xd2\x0ct\xea\x90\xf6?fM\x8b]\xb8D\xbc?U\xfe\xb4Gl\xe2\xed?_=\xf5k\x84\x15\x92\xbf\xd2On\xd0*+\xf1?\xc9-\x14H\x93\xe8\xb0\xbf\xcc\xd4\xb4\x7f\n\x7f\xf2?\x837\xb77\xe4\n\x89\xbfb\x80\xa8\xddL\x80\xf1?s;^\xd1\x88]\xa1\xbfE\xb9\x9f\x91Z\x81\xee?\xee\xaa\x9bZ*\xa8\xc7\xbf\xfe\xb8ExT\xdb\xf4?\x95`\x06(Ct\xa6\xbf!\xda\xc5\x9e\xb6U\xf0?\x01\n\x1ew\x04\xe6\xc8\xbf\xf6H\x04-\xaeb\xf2?\xd5C\xa5\xe9\xe1z\xb1?\xac\x96\xec<\x00\r\xeb?;\x9a\x06J\x10\x91\x8d?vl\x17l\xff\xd2\xec?8R\x1d\xc3\x8dJ\xae\xbf\x9a\xb8\x1f*\ry\xf0?e:\x0bTM\xcd\xb2\xbf|C\x81\xeb\xc1o\xed?\x0f\xfe\x9e}\x84!\x94\xbf\xab\xc9\xe7*\xf2\xda\xec?n\xf8\\%o\x9b\x81?B\x915\x0b\xc1\xb7\xf0?\xfa:3\x86\xf0\xa3\xa3?\xa5\x13d\xcd2\x96\xe9?I,\x0e\x1b\xf4\xe7\xa3\xbf\xf4A\xedL\x9cp\xed?\x06/\xdc2\xa08\xb2\xbf[l,\x0f\x84\xea\xf4?:\x99l\x83\xa6g\xaf\xbfa\x1d$\x1d\xeav\xf0?#]\x15E\xa1R\xa5\xbf\xff\xd5`\xa2\x86\xad\xf0?Q\x97\xbf3-\xf5\xd5?\x99h"6\xc4\xde\xd5?\x05\xae\xb0\xfb\xb59\x8a\xbf\xc0X\x8d\x1e\xda?\xf1?\xe6|u\xe6\x16`\xce\xbf\xde\n\xfa\t\x18.\xff?V\xae\xe9\x05e0\xcd\xbf\x9d\x02\n\x8d\x82b\xfd?\xf1u\x1c\x0fzO\x97?\t\xd4\xa4\xdc\xc3B\xee?0\x80\xed\xc6\x10b\xa2\xbf\x8c\xdc\xe0\xc27\xc4\xf0?\xff \xdb\xb8\xd25\xa5\xbf\xa6\xf6\x02_\x92\xae\xf1?\t\xc3\x14\xec\xa8~\x98\xbf7F9\xa3\x8c\xb0\xf0?\xac@\xcd\xf1\xff\x1b\xa5\xbfI\xa9J6\xd2\n\xf3?\tO*w\xcb\xf9\xab\xbf\x1ap,\xa79\xb6\xef?.\':\xbf\x10}\xa8\xbf$\xe5\xb3\x9c\xa3x\xf3?+Q\xcdz\t\xcf\xa4\xbf\xf8\xda\x0f\xd9\xca\xc4\xf0?\xf7\xdb\xd8\xda\xdbK\xa3?\xe6`\xbb\xba\xb9G\xed?\xf58\xf9\x92&\x88\x9d?R\x06 \xb4\x1cI\xee?\xafrZ\xfc\xb5\x04\x92\xbf\xab:\x01\x1d6\xf7\xed?Hr\x92\xd0\xfa\xa4\xa7?e\xcd%\xa5\xc56\xed?T\xbax\xd0h9\x86\xbf\xf6\xb0\xd9N_\n\xf2?\x9a8\x01\x87\x19\x04\xaf\xbf\xc3\xf1L^\n\xd2\xf0?\xc2\x08q\xb4\x98n\xb6\xbf\x9266\x8d\xed\xaf\xf1?I\x0f\xa6\xba\xea\xeb\x87?\x10\x0c\x9b\xaf\x15\x08\xef?\xc5W\x07\xbd\x92\x95\x9e\xbf\x14=\t<\xe5\xa1\xf0?\x9d\xb1\x87\xb32vx?\xa5TH\xbfD\xc0\xeb?c;xqo\t\x80?\xc2\xb8hf\xd2/\xed?\xc4;\xd9\x9f\xe5*\x9f?\xa5\x1cD\xfb\xb8\xf9\xe7?\x1a\xbb\xc7\xe9\x8b\xd1\xae\xbf\xb9\x0f\x91\x99\xbb\xe5\xf2?`\xaf\xba\xb1\x8b&\xd1\xbf\xfc4\xe3\x97\x93\xc1\xf6?\'{\x8c\x90\x9d\xadz?\x8d\x93\xc9\x9aZ\xe1\xea?\xbb_>\x90h\x13\xa4\xbf\xcf1\x90\xd2@\xef\xf1?\xf5\x89_\xb0k\xb3D?\xc4\xe4Hl\xa7\x07\xef?B\x86\xd1b\x05\xb3\x82?z=\x9d6\xc8|\xed?\xfb\xc4\xa3\x90}X\xae?\xd8\x07\x0c\x98\xea\xd5\xea?\x0f\xa0z7\xfe\xa4\xb5?0\x1e\xb8\xd7R\x91\xe8?\xa2eX\x07\xee\xb4\xbc\xbf/\x0b\xe7\xaf A\xf2?\xa6\x11\xa6\xdf\xde\x0bZ?/\xd5\xec\xb8\xcav\xef?\x13\xedN\x9f\xcb\x03\x83\xbfj\n9\x96\x96\x9a\xf0?\xc8s\xe26\xfc\xa0\x90?\xfcJ\x82R\xa6!\xea?\xc0JY\x85\xe8\x1c\xb1\xbf\x19j\x18\x05Ne\xf2?dY\xdek\x07h\x81?\x8b\xb1/\xe3,,\xee?\xf1\xc0\x86\x96\xfe\xf8\xb1\xbf\xec\x1f\xcbx\x99\xde\xf2?>\x15!\x97\xaa\xa5\xc4\xbf.qI92\x12\xf4?\xb8x\xce]\xb3Y\xb1\xbf\x12\x93\xada\x8d\x0f\xf3?\xd2l\xfc?r\x8f\xa2\xbf\'\xf7n\x88|\x94\xf0?5\x0e\x1bOJQO\xbf\xbf\x107v\xdc\xd5\xec?\xa6z\x15\x07\xd5~\xb6\xbf\x17X\x8d\xe9T\xe8\xf1?\xd8\xc6\x83@\xcc\xcd\x89?\xc7b_\xc80\xab\xee?\xea\x97V\x02\xae\xe1\xa0\xbf\x96\x8aMD\x8a.\xef?\xb9^\x05-\xfb\xb2\x97\xbfd]\r\'\x04\xa0\xf1?\xd1\xfd\xf0\xb6\x00\xb9\xb5\xbf\x1a\x8fuNl\x9b\xf0?\xd36(\x97\xc9\x0c\xba\xbf\xa4\xf3r>Z\xb1\xf1?\xceA\x9f\x08[\xe9\xa0?a\x89\x07\xc1\xb5\x97\xeb?l\x8bxr\xd0\xd5\xb9?\x9a\xdd\x1d\x10J\xa0\xe3?J\xb1i\xb1\x98/\xb5\xbf\xfe\xb5a\xb3\xdeH\xf2?\x82\xee\xb6\x0b\xcb\xd0\xa2\xbfc\xc15\x1b\n\x1c\xf2?\xa0\xf0\xa3\xf1\xc6\xe0\xab?_\xc4\xf5i\xc4T\xec?\xbe\rn\xebU\xee\xc4?\x81e\xa8\xb1\xdf>\xe8?\xecA\xd7+7\xa4\xb7?>\xaf\xe4\xf5\xbd\x88\xe9?\xbb\xe3\xb4\xbd\x10\x83\x8c\xbfZ\xaf7\x02k\x84\xf0?\xfa\x05\xa3x\x06\xa2\x95?u\x1e\x16b\x04U\xf0?\x14\x13T*\xb9s\xa2\xbf\x1c\x04rQ\xf3\xec\xf0?\xbb\xc3K(Y\xc2\x90\xbf\xa3h\x86\x1d\xbf\xf4\xe8?q\xa0\x15(\xfd4\x91\xbf\xa4,I@\xd1/\xf0?6\xa8\xad\x1e\xac\x8b\xad\xbf\xa9\xb5\xd3\x0e\xb5\xda\xf1?\x03\xd7\xe4\xcdQ\x83\x98?\xdavO,\x1e\x05\xee?\x85\x9b7\xfce\xcf\xae?\xa6:Zp\xf8\xd5\xe9?H\xef\x94\x84V\xef\xa7\xbf\x1b0\xc4\x0f\xa6j\xf1?b\xf66\x8f\xad\x1f\xb3\xbf\xbf\xc4\x93q\xea\xed\xf1?[\xc9\xdf\xaa\xb1\x1a\xa1\xbf\xb5X\xc6\xd9\xfb\xe9\xec?\x1f\x16\xbb\xc0M\xcb\xb1\xbf@-;\xb8z>\xf2?\xd9\xe2\x87\x7f\xb4\x13\x8e?\xed\x1e\\W\xef\xb4\xed?\x0b_r\xdf\x0e\xe4\xb2\xbf\xa5\xd8\x1f\xda#z\xf0?\xa4\xb0\x06\xa1\xe5\xc5\xbb\xbf\x91\x9b\x12\xaa\xbeM\xf1?tA\xd4y\xe8\x0f\xa4\xbf\xb2\xfd\x97\xb8T\xc2\xf1?\x94\x91\xea\xac\x92Mt?\xb4\xc8\xff\xe1\xf5\xcb\xf0?\r\xe8\x02\xb4\x174\x95\xbf\xd6\xfe\x89v\xcc\x9f\xf0?oX\x1dG\x05b\xa2\xbf=\xba\xc7\x0c\xc1B\xf2?\x14\x96\xa6\x94\xa9\xee\x9e\xbf\x83^\x1e\x1a\x83\xfe\xf1?^\x14\x01\xc2@\xb7\x94\xbfY\x8c\xd7C\xab\xbd\xf0?\xc8\xcc\xa0\xb7h\x89\x8a\xbf[\xf88\xf4\xcc_\xf1?\xa0`\x15\xee\x80J\xaf?\xe1/\x03v\t\xa2\xe8?m\xe2\x9e\x059%\xa1\xbf\xf8?t\xba\x1bX\xf1?b(\xff\x07\xd0\x86\x81\xbf\x8a\xde\xb0\xda\x0e\x13\xee?\xce\xd6\x17(n\x12\xa3\xbf\x121\xf8U\x1c\xff\xef?\x82\x00\x02\x84I\x1c\x8d?\xfb\x8a\xd3&"\xf1\xee?\xe4\xaefWG\xb7\xa4\xbf\xc7\x8bv\x8b\x13\x15\xf1?!\xe9\xff\xfa\x00\xf0\xb7\xbf\xd9P\xae\xc5\xfc4\xf1?\xa4P\xcf\x03\x8a\x8e\xc0\xbf\xea\xf2\x8a\xa3\xef\x9a\xf5?c\xfd\x06\x17r\'\xbd\xbf\rkza\x9fZ\xf5?J\xfd\xcc$D\xc1\xa5\xbfi\xef*\xa0\xe9j\xf1?d\xc1\x84\xaf\xbeCy\xbf?"#\x89\xf8\xd1\xef?#\x81\xd1T\xc0\x0f\xd7?\x00\xa5\xb8"\xde\x17\xf5?\xb0\xbfb\xfcC\x86\xc3\xbf\xd2\xab\xa8\x9a\xa0\xb2\xf6?\x97N\x1e\x93\x12\xb4\xaf\xbf9K\xebD\xcf:\xf0?\xee\xfd\xdc\x97\x86|\xb3\xbfN8\xf6\x97\x86b\xf2?3O\x18\xd2\xd9V\x95?\x8a\x14\xe0\xd8\xc2z\xed?\xf2=\x08\x8dvj\xac?R\xd4\x0b%5\xed\xee?\x88o\xfb\xd8\xbd\x9a\xb2\xbf\xefU+lr\x98\xf0?\x9d\xdc\xba\x9f\xd7\x9cd\xbfy\x1b\x10\xf6\xbe\xb1\xef?\xc3\xbe\xc4\xffA\x03\xd0?A@\x05\xde)\xb9\xe5?\xcat\xa2\xe9\x83\x92\x91?\xf0\xebc\x89,\xd9\xed?a\xa4\xc62\x83\x02\xb7?\xac5\x84R}\x1d\xe9?Y]\x1a\xd7\x96\x0f\xb2\xbf\xa4\x95\x97kv\xdd\xf1?!F\x8b\x1d\x0c\x8b\xa0?\xecXd\xa8\xf1e\xeb?5\xe9\xb3R\xd6\xbf\xd4?\x87\xd7^\x88\x99\xcd\xe2?@\x95\xcb~\xfc\xd8\x97?\x08lSG\xc6(\xeb?\x83\xc7\x8f?\x12:\x99?\xa1\xcbB\xb6>\t\xec?\xca\xa9\x10E"\xa7\xdf?l\x89=\xb9\xfd|\xcb?\xd9\xc6\xf6@\xae-\xaa\xbf\xc0s\x06\x83\xff6\xf0?\xdeT\x9f\xd2]\x94\x97?\xed\xfan\xb4\x1c]\xeb?lFS\xdf\x19\x9e\x96\xbfv\xeaU\xc3\xae\xab\xed?\x19\xf8\xe4\xfc\xd4\xb1\x9e?\x9b\xaa\xb0\x98\xa1l\xee?\xddh\xe6b?H\xc0?e\xac\\\xb1\xaaW\xdf?\'c\xb7L\x89\x9a\x95?\x97\x18\xf6_\xdf\xd2\xed?\xa8\xa6\xdc\xed\xa18\xa8\xbf\x90\x94\xaa\xcf\xac\t\xf1?\xe0C\x06\xd19\xdb\xb1?\xa2\x1f\x0c}\x167\xe3?\x02\xa0\xe2\xf5-:\x91\xbf\xe7\xc8\x9d\x85\xa3\xab\xeb?\x84\x00\x12o\xa4\x04\x8c\xbf\xc8\x1b\x1fa\xa7\x92\xf0??\xd5\x05\x7f\xe5d\x9e\xbf(\x8f\x0c\xa5\xea\xea\xef?\x93\xd0\x87\xc9y\xad\xc1\xbfy\xb9\xce\xda\xe5\xc0\xf2?\x96\xdd\x9c \xd7\'\xbe\xbf\x8eI\xf2)\xa04\xf3?!\xcc\x87\xd1U#\x83\xbf?\x98<\x02\x90x\xec?1\xfd\x87YB\xf0\xb5\xbf-\xd2\xe4e\xcbC\xf1?\x8e\x17\x19\x06Uf\xaf\xbf\xfd\x1f\xe7\xb98\x85\xf3?\xb7\xc9$\xb8W\x81\xba\xbf\x02vA\xc1d\xb7\xf4?\xb9\xef\xb0\xa0\x0f(\xa2?.W\x9dR\n\xf3\xe9?(\xe9\xbd#Ui\xa3?\x9a\xc42\xa3$\xe5\xeb?\x95\x18l\xe4\xfc\x14\x97?}V\xef$\x8ae\xe6?\xcb^\xe2\x8d\xce\x16l?\xd4\xbe\xae\xb7\x89(\xee?\xd1LJy\xf1\xb1\x9c?\x1a\xd2\xb1\x82}[\xeb?\xc4\x0c\xe1:\xb3\xcf\xa5?\xa6i\x83\x7f\xba\xf1\xeb?2\xd3\xediTa\xb2?\x81\xb3\xc8\x96iT\xe8?\xce*\x1c\xf4x\xf6\x99?f_\x9f\x89\x9b#\xf1?\xf2B\xae\xe6\xaee\xa7?\xa5\xe2\xbfx*\x9a\xea?,p\xeb*1\xef\xa1?\x03\xe5=\xaf\xf3?\xed?\xdc\x8f/\xa4\xcc,\xac\xbf\x16\x0c\x1bR\xdc\xfc\xf2?/\xbcwn\xfa\xa0\xa3?\xa9\xc5\x08\x1f\x86\xa5\xf1?\xe2n\x87\xd9\xed\xd4\xac\xbfb\xdc5\x83\xe5B\xf3?\x8e\xe1\xc6\xe0c\xc0m\xbf(\xb6m\xa0\xa0b\xec?\x82\x7f\xcdZ\xe5X\x9a\xbfH\xbfx\x94\x07\xc4\xf1?\x99\xa3JU\xf3\x15\xc3\xbf,\x14i\xd6\xd4L\xf0?t*\xea\x04V"\xa8?\xc6\x82}\xfe\x97\xa1\xe5?\x8c\xe5iw\x1b\'\xaa\xbf"\x85`AR\x8a\xf2?\xd8\xe2\xe7\xb4b\xa9\x99\xbf\x8az\x9bO:\xfb\xf1?\xc1\xebz\xbf\xff\xd5|\xbf\x14\xe3S\xb9\xc2\xa0\xf0?\xa2\xaf\xe2C[\xad}?<\xdcO\xa2\xd6e\xf3?V\xdd\x0ffR-\x9b\xbf\xfa\xf8\x9bLX\x85\xf1?\xb8\x17j\xa6\xfb\xdd\xb3\xbf\n\x0c.?O|\xf1?q\xd2\xc4+\x07\x86\xaf?\xa1\xe9\x93!p\xb6\xeb?\x97\xfd\xd2\xa9\x84\xa9\xae\xbf\x93\xf4\xd0A\x92\x83\xf5?:Db\xfcW\xe1\x8d\xbf\xe2t2\xe8[\x9c\xf1?\x90\xad\xe2\xedo\n\xb2\xbf\xb6\x97\x06^N\xbd\xef?\xb4\xaa\x7f#\xed\xeb\xbf?\xc8\x82\x12e\xde\xde\xe6?K\x9a\xae\x91b5b?\x91\xd3=\xf8\xecW\xeb?\x15\xeb\x87n\x84\xa1\xa0?i\x07U$Z\xd2\xeb?)\x19\x12ns\xa9\x8c\xbf\x17\xf2\x18\x175L\xef?Z\xdb\xe7\x0c\x8av\xa2\xbf\xe1e\x92\x88\x89|\xef?n\xd7\xf0\x93$n\x9c\xbff-\xb7_\x8a?\xf0?\xa2>\xb2\x98\x003\xb6?\xc1\xd1\xf6\xcb\x80$\xe9?\x05s\x98p\xcfl\xb3\xbf\xc4\xbe\xd9\xb2\xf8\xd5\xf3?\'v\xc6g\xdb\xa5\x88\xbf\n{\x869\x18-\xf1?\xa8\xa1\xa4\xd3]\xfc\xa6?h\xc0\x03\x8b\x19\xd0\xe8?\xc7do\xfa1\xa5\xce\xbf1H>X\xf3E\xf8?\xf3\xb5\xc4?\x11\xa2\x9f\xbf\x9fv\xff\x16\xccz\xf2?s\xea\xbbzB\xd0\x89\xbf\xcb/Z\x9d\xe5\x12\xec?\xd2`C\x9e\xf2#\x96?\x90\xe8AmK\xe6\xec?%`\xeeGs\xb6\xaa\xbf%C\x10\x18\xd3N\xf0?\xe6\x97\xe7\xdaQ:\xc8?\xa7\xf2\xefY\x08\xb9\xe8?e:\xa3\xbc\xa9S\x99\xbfm\x9e\xb6\xf2\x9c\xd7\xf0?\xda]\xd9\xad\x9c\x9dG?5\x13\'E\xa1$\xee?\x8a%\xb2mu\xad\xa1\xbf\xba\xdfWU\xd71\xf0?K\xe3|MO\x10\xcc\xbf\x8f5\xbcU\xfe\xd4\xf3?'
p221
tp222
bag2
(g3
(I0
tp223
g5
tp224
Rp225
(I1
(I2
I319
tp226
g12
I01
[truncated: 378,761 more chars]
