# Supplementary material for: How biological attention mechanisms improve task performance in a large-scale visual system model
Source: eLife journal article supplement (doi:10.7554/elife.38105), 2018-10-01
Supplement: supp [file elife-38105-supp-v1.zip › elife_poa_e38105_Figure_6_source_data_2.txt]

(lp0
(lp1
cnumpy.core.multiarray
_reconstruct
p2
(cnumpy
ndarray
p3
(I0
tp4
S'b'
p5
tp6
Rp7
(I1
(I2
I64
tp8
cnumpy
dtype
p9
(S'f8'
p10
I0
I1
tp11
Rp12
(I3
S'<'
p13
NNNI-1
I-1
I0
tp14
bI01
S'\xc4\xfcC\xc9\xe0j\x98\xbc\xfc\xff\xff\xff\xff\xff\xef?\xc4\xfcC\xc9\xe0j\x98\xbc\xfc\xff\xff\xff\xff\xff\xef?\xc4\xfcC\xc9\xe0j\x98\xbc\xfc\xff\xff\xff\xff\xff\xef?\xc4\xfcC\xc9\xe0j\x98\xbc\xfc\xff\xff\xff\xff\xff\xef?\xc4\xfcC\xc9\xe0j\x98\xbc\xfc\xff\xff\xff\xff\xff\xef?\xc4\xfcC\xc9\xe0j\x98\xbc\xfc\xff\xff\xff\xff\xff\xef?\xc4\xfcC\xc9\xe0j\x98\xbc\xfc\xff\xff\xff\xff\xff\xef?\xc4\xfcC\xc9\xe0j\x98\xbc\xfc\xff\xff\xff\xff\xff\xef?\xc4\xfcC\xc9\xe0j\x98\xbc\xfc\xff\xff\xff\xff\xff\xef?\xc4\xfcC\xc9\xe0j\x98\xbc\xfc\xff\xff\xff\xff\xff\xef?\xc4\xfcC\xc9\xe0j\x98\xbc\xfc\xff\xff\xff\xff\xff\xef?\xc4\xfcC\xc9\xe0j\x98\xbc\xfc\xff\xff\xff\xff\xff\xef?\xc4\xfcC\xc9\xe0j\x98\xbc\xfc\xff\xff\xff\xff\xff\xef?\xc4\xfcC\xc9\xe0j\x98\xbc\xfc\xff\xff\xff\xff\xff\xef?\xc4\xfcC\xc9\xe0j\x98\xbc\xfc\xff\xff\xff\xff\xff\xef?\xc4\xfcC\xc9\xe0j\x98\xbc\xfc\xff\xff\xff\xff\xff\xef?\xc4\xfcC\xc9\xe0j\x98\xbc\xfc\xff\xff\xff\xff\xff\xef?\xc4\xfcC\xc9\xe0j\x98\xbc\xfc\xff\xff\xff\xff\xff\xef?\xc4\xfcC\xc9\xe0j\x98\xbc\xfc\xff\xff\xff\xff\xff\xef?\xc4\xfcC\xc9\xe0j\x98\xbc\xfc\xff\xff\xff\xff\xff\xef?\xc4\xfcC\xc9\xe0j\x98\xbc\xfc\xff\xff\xff\xff\xff\xef?\xc4\xfcC\xc9\xe0j\x98\xbc\xfc\xff\xff\xff\xff\xff\xef?\xc4\xfcC\xc9\xe0j\x98\xbc\xfc\xff\xff\xff\xff\xff\xef?\xc4\xfcC\xc9\xe0j\x98\xbc\xfc\xff\xff\xff\xff\xff\xef?\xc4\xfcC\xc9\xe0j\x98\xbc\xfc\xff\xff\xff\xff\xff\xef?\xc4\xfcC\xc9\xe0j\x98\xbc\xfc\xff\xff\xff\xff\xff\xef?\xc4\xfcC\xc9\xe0j\x98\xbc\xfc\xff\xff\xff\xff\xff\xef?\xc4\xfcC\xc9\xe0j\x98\xbc\xfc\xff\xff\xff\xff\xff\xef?\xc4\xfcC\xc9\xe0j\x98\xbc\xfc\xff\xff\xff\xff\xff\xef?\xc4\xfcC\xc9\xe0j\x98\xbc\xfc\xff\xff\xff\xff\xff\xef?\xc4\xfcC\xc9\xe0j\x98\xbc\xfc\xff\xff\xff\xff\xff\xef?\xc4\xfcC\xc9\xe0j\x98\xbc\xfc\xff\xff\xff\xff\xff\xef?\xc4\xfcC\xc9\xe0j\x98\xbc\xfc\xff\xff\xff\xff\xff\xef?\xc4\xfcC\xc9\xe0j\x98\xbc\xfc\xff\xff\xff\xff\xff\xef?\xc4\xfcC\xc9\xe0j\x98\xbc\xfc\xff\xff\xff\xff\xff\xef?\xc4\xfcC\xc9\xe0j\x98\xbc\xfc\xff\xff\xff\xff\xff\xef?\xc4\xfcC\xc9\xe0j\x98\xbc\xfc\xff\xff\xff\xff\xff\xef?\xc4\xfcC\xc9\xe0j\x98\xbc\xfc\xff\xff\xff\xff\xff\xef?\xc4\xfcC\xc9\xe0j\x98\xbc\xfc\xff\xff\xff\xff\xff\xef?\xc4\xfcC\xc9\xe0j\x98\xbc\xfc\xff\xff\xff\xff\xff\xef?\xc4\xfcC\xc9\xe0j\x98\xbc\xfc\xff\xff\xff\xff\xff\xef?\xc4\xfcC\xc9\xe0j\x98\xbc\xfc\xff\xff\xff\xff\xff\xef?\xc4\xfcC\xc9\xe0j\x98\xbc\xfc\xff\xff\xff\xff\xff\xef?\xc4\xfcC\xc9\xe0j\x98\xbc\xfc\xff\xff\xff\xff\xff\xef?\xc4\xfcC\xc9\xe0j\x98\xbc\xfc\xff\xff\xff\xff\xff\xef?\xc4\xfcC\xc9\xe0j\x98\xbc\xfc\xff\xff\xff\xff\xff\xef?\xc4\xfcC\xc9\xe0j\x98\xbc\xfc\xff\xff\xff\xff\xff\xef?\xc4\xfcC\xc9\xe0j\x98\xbc\xfc\xff\xff\xff\xff\xff\xef?\xc4\xfcC\xc9\xe0j\x98\xbc\xfc\xff\xff\xff\xff\xff\xef?\xc4\xfcC\xc9\xe0j\x98\xbc\xfc\xff\xff\xff\xff\xff\xef?\xc4\xfcC\xc9\xe0j\x98\xbc\xfc\xff\xff\xff\xff\xff\xef?\xc4\xfcC\xc9\xe0j\x98\xbc\xfc\xff\xff\xff\xff\xff\xef?\xc4\xfcC\xc9\xe0j\x98\xbc\xfc\xff\xff\xff\xff\xff\xef?\xc4\xfcC\xc9\xe0j\x98\xbc\xfc\xff\xff\xff\xff\xff\xef?\xc4\xfcC\xc9\xe0j\x98\xbc\xfc\xff\xff\xff\xff\xff\xef?\xc4\xfcC\xc9\xe0j\x98\xbc\xfc\xff\xff\xff\xff\xff\xef?\xc4\xfcC\xc9\xe0j\x98\xbc\xfc\xff\xff\xff\xff\xff\xef?\xc4\xfcC\xc9\xe0j\x98\xbc\xfc\xff\xff\xff\xff\xff\xef?\xc4\xfcC\xc9\xe0j\x98\xbc\xfc\xff\xff\xff\xff\xff\xef?\xc4\xfcC\xc9\xe0j\x98\xbc\xfc\xff\xff\xff\xff\xff\xef?\xc4\xfcC\xc9\xe0j\x98\xbc\xfc\xff\xff\xff\xff\xff\xef?\xc4\xfcC\xc9\xe0j\x98\xbc\xfc\xff\xff\xff\xff\xff\xef?\xc4\xfcC\xc9\xe0j\x98\xbc\xfc\xff\xff\xff\xff\xff\xef?\xc4\xfcC\xc9\xe0j\x98\xbc\xfc\xff\xff\xff\xff\xff\xef?'
p15
tp16
bag2
(g3
(I0
tp17
g5
tp18
Rp19
(I1
(I2
I64
tp20
g12
I01
S'\xf0\'\x00\x11=\x14\xc1\xbf\xd6t^\x067\xcd\xf4?\xa5~\xb7h^@\x96?\x85\xea2\xd6\x93Z\xee?\xce\x97\xefL_$\x84?\x03\x06"\xda\xdbv\xef?\x0fyh\xef\xa1\x85\x88\xbf?\xe4\n\xb0\xabx\xf0?\xf4\xedK\xd9\xf5\x9c\x86?W\xd2\xc7\x0f\x14F\xef?\x87\xe9p\x8c\xe6W\xaf\xbf\x97\x9c\x99\x86iq\xf2?\xe1%\x12K\x87\x9d\xc2\xbf\xc9\x0b\xc8\r\xe3\x08\xf5?`\xd4vH\x16+\x90?\x87Z\xd0j\x7f\x06\xef?`\t\xa3y\xdf#\xa4?ZL\xa0\x11\x17\x1c\xed?+\xa6\x97\x8e\xb7-\x96\xbfF\xd2\xb8zm\xc7\xf0?\xa61*\xd1v\xbb\xc5\xbf/\xdf\x91G\xe6 \xf6?\xa7\x99\xee"KM\x9b?\x98\xf8 s\\D\xee?oC\x14\xab\x00\xb3\xc4\xbf\x9b;\x81\x18R\xbb\xf5?\xab\xdd\x98\xfa]\xad\xca\xbfD\xe7\x936Kn\xf7?}\xde|1\x80\xb2\x95?Y1\x98\xda\xfd\xad\xee?]\xf7\x15V\xdfQ\x8b\xbf\xbc\xe8+\xe47\x86\xf0?k\x85\x8c\x1a<\xca\x9d?+\xbaS\xfc+\xb8\xed?\xeeR\x13\xe0\rT\xca\xbf\xfd\x96r$\x02\xf1\xf6?\xa3\xcb\x01\x1f\x94-\x95?\x98M\xc1\xe0\x17\xb1\xee?#\x8b\xd7\xd8Lx\xc2\xbfc\x92\xd1\xf4_\x10\xf5?\x02I\x88\xd1\xee\x02\xca\xbf\tq\xa9\x99N\x1f\xf7?\x06\xed\xedt2?\xc5\xbfu\xcd"\x93"\xb9\xf5?\x9b\xeef&\x13\xc9\xa0?\xfc\x9e\xee\x81w\xa1\xed?\xd1w\x86|k(\x9b?\xf9l%\x8d\x16L\xee?\x14\x8a\x10[<K\x96?\x9c\xac\xb8\xaf\'\xaf\xee? Gh\t\x1c[\x93?O\x0f}\x14\xf7\xa2\xee?\xc46$\xb9\xbes\xce\xbf\x04\xf1.,\xecD\xf8?\xa2/\x83r\xf0(\x96?\x99t\xe7\x83\x81\xa0\xee?\xf5w\xf9a\x00u\xc3\xbf\xe0/\xa4\x0b&>\xf5?\xfedX\x9dq\xbb\xcc\xbf\xee\xa5a\xa7\x1d\xef\xf7?\xe8\xb8Y+YV\xcb\xbf\x18~o\xf3\x90V\xf7?\x01/k\xd9\xd5\xf8\x9c?\xab\\\xca\xa4\xbd%\xee?\xe1yq\xe3\x88)\xcb\xbf\x14\xa6i\xd3\xc2f\xf7?{\xc9\xd6\x16E(\xd0\xbf\x06\x13r\x17\xae\xda\xf8?\xd4\xb12\xe7\x1a\x9d\xb2\xbf-\x1d\xf5\x91\x02\xb7\xf2?\xa1\x81\xf8P]\x97\xc4\xbf\xb2\xfb0w\xe6\xab\xf5?\xc1\xa8\'\xd5\xe5@\xc8\xbfMn<\x1c\x9b\xa9\xf6?Ku\xaa\xf67{\xc8\xbfL\x9dc\x82\n\xc1\xf6?.\x05>$\xf4\x1a\x91?\xb49\x11\xe14\xbf\xee?\xcbi \xbff\xcb\x98?;\x01\xfch6I\xee?\xd5\x9f6IS\xaf\xc6\xbf\x13\xd0b\r\x9a*\xf6?\x13\xa9+\xa6\xfcM\xbf\xbf\xd6\x88\x12Z?M\xf4?Zeh\x1d\xc6\xa6\x89?Ns0\x83rE\xef?\x81\x8dH@Q\x1b\xba\xbf%\xca\x07^kX\xf3?Q,\x1d\x82\xda:\xcb\xbfN\xcf\x16\xba\x8fh\xf7?/\xac\x9b\xaes\xc6\x9a?Y\xdfS\xc4\xdfT\xee?\xbc1|\xa8\xf7)\xbb\xbfu\xd3\xc2\xf1R\xda\xf3?\xbd,$\xcb\x82\xf8\xa3\xbf\xedv\xfe\xcdC\xa1\xf1?\x03\x8a^b\x7f\x00\xc5\xbf\x1b+\x8d\xbb\x87\xc3\xf5?9\x95WE\xb9g\x8e?\xb9\xab\xbbi(-\xef?im=&n9\xcc\xbff\xf1$P\x0b\xae\xf7?\x9cl|\xba\xa0so?^-8sE\xb9\xef?\xbe\xb1?\x022\xc2x\xbf\xc7\xb9\x9b\xd9a0\xf0?\x8b\xfe\xe8\x1b\x8aL\xc7\xbf^\x81 2>R\xf6?\xed\xf8\xa9\x9bx_\x97?\xf9\xce\xa18\xb9\x9d\xee?\xad\xc8\xed\xdf\x86\xe6\xca\xbf\x8f^3$\xbfM\xf7?\xe8:\xb8\x0cg\x8b\xc5\xbfiR\xb3\x93\xbe\xd5\xf5?\xa9%\xb10\xb2(\xc9\xbf\xee>S_b\xce\xf6?\xc6O&\x04o<\xca\xbfK\xec\x1a\xffs3\xf7?i*\x08\xf4k\x89\x9a\xbf\xd5w(\\1\xba\xf0?\xb3\xb6\xe6c;A\x91\xbf\xd2\xa4\xf7\x0e\xde\xa4\xf0?S\xac\xd1\x7f!%\x96?\x93w\x806\xb4\x93\xee?\xe7\x96o\x14e\xa5\xcb\xbf/\xf0\xfd\xf2Ob\xf7?\x85\xf2\x8a\xb8xr\xc5\xbf\x91qI\x99]\xfd\xf5?'
p21
tp22
bag2
(g3
(I0
tp23
g5
tp24
Rp25
(I1
(I2
I128
tp26
g12
I01
S'm[\xf8RV/\x97?\x01\xc8\xdc\xde\x81=\xed?\xca\x13_c\xf4\x98\xb5\xbf\xc3\x90w\xc5m\x07\xf4?X}\xcb\xa7 E\xb6\xbf\xbc*\x87d*P\xf6?\\\x93\\u\x06\x89\x99?\x88@\xac\x91\xcf\x05\xef?dU\r\xdc\xb1\xc6\xbb\xbf\xcd\xa0\x0e\x8fDJ\xf5?\x93\xc9\xc1\\\xdc\xdf\x91\xbf\xa9\x8b\xd4\xaa\x00{\xf1?\x17\xab\x1d\xfeD\xb1\xc5\xbf\xd6p\xa41\xca\xe8\xf4?\xa1\xe5\xd4>Z\xd7\x89?\x08.2\xd8\x94n\xf0?\x91\x9b{U\xd0y\xa6\xbf4\xea\xd9\xbb)\x9b\xf2?&\xa5\x0e\xf4k.\x91?k\xe5V\x12\xa98\xf1?*\xab\xb7\x8aS\xda\xb3\xbf\xb8\xf3\xd5\xc3\xf8\xc0\xf3?\x95a\x8b\x9d\x1b\xbc\x98?\xfe>n\x0e\x93\x96\xf0?I\x0e\x9f\x80\xe7\xa0\x9a?\x9d908\xae\x15\xef?\x00\xa3X\xcbv\xc9\x8c\xbf\xb4\x7f,\x9c\xde\x05\xf3?\x00F=\xde;U\xa6\xbf*\xc7o\xed\x8f\xe9\xf1?\x0b\x1e\xd5\xfe\xe6\x12\x8e\xbf%w\x0e\x1dAD\xf2?`\xf5D\xb8K\\\x94?\'2{\xaa\xfc\xa0\xf0?\xdbV\xa4\xb3&C\xbb\xbfB\xd4\xf0\x96 \'\xf5?\xe1\xf9opL\xcc\xbb\xbf\xd0\xb1\xd3\xde\x853\xf4?\xdc/\x18\xc6\xc2\xe2\xa0\xbf\x809\xfc\xbb=\xd2\xf0?0\x9d,\xf7k\xef\x9d\xbf\x8c\xe3z\r-\xc6\xf0?8\x172\xb3f\x06\x94\xbf\xfb\'lQ\xea\xd4\xf1?\x9d(\xcc\xfe\x071\xc8\xbf\x94\xc1Jk\x1d\n\xf8?\xa7\xafF=\xecwR\xbf\xa07U\xb8\xce\xf9\xf0?\xd7\xc1\x07\xe5\x88\x13\x92?\x92\xbct\xa6\x1c\x88\xf0?\xd9H\x87\xa9aR\xb7\xbf\xb1\xb3\xf6\xc4\xcc\xdd\xf3?\x1d\xf2\xe0M5\x08\x94\xbf\xd29u\x19\xa9V\xf2?`D\x11 \xab\x14\x80\xbf\xe1\x85u\x07\xff0\xf2?\xcd\xb1\xcf\xcb\xc0\xfd\xd7\xbf0\x968v\xe26\x00@\xfc2i{\xba\xb2\x86\xbf\xca\n\xb1\x05\xd13\xf1?\xf5\x983\xc6\xa2W\xbb\xbf\xe0\x08\xcf\x15\x81N\xf5?\x8e7\xb0\x96(\xa1s\xbf\xb5\x81\x92S\xe6\xd2\xf0?\x1c\xd9\x93\x8f\xde\xfa\x94?>U8\rK\x97\xef?D\xd8?\xa0\xaf,\xb5\xbf\xf1,(\xf0`d\xf4?\'Z\x9e5\x99\xba\xd5\xbf\xda\xb18\xe0\'\x05\xfd?\xe3\xb9^\x16\xa3\xbf\x92?\x9aIY\x05rQ\xf1?\xdb\xe9\n\xfc\xa6\x88\xb5\xbf\xde\x04k\x1fLp\xf4?O\xcd_q\xf10\xbc\xbf\x0b4\xac\xc4\x015\xf4?\xda)dE\xb5<\xb1\xbf\xd4T\xcc\x12$\xc6\xf3?4i\xc9\x91\xbc\xb7\x8d?\x7f\x15Z\x11\x0f\xb8\xf0?\xc2f#~u!\x92\xbfm\xda\xad\xeb\x99}\xf0?[\xba\xbfPC`\xb5\xbf\x13\xd5\xb8\xe4\x1e>\xf3?\xc1\xe0\x7f\x9a6\xb9\xb3\xbf\xd5\xa3E\xea1t\xf3?w\x16\x17\x06\x89\x98\x90\xbf\t\xca\xfc\xdc.\x10\xf0?\x13v\xf8Y8\x94\xb3\xbf\xdc\xe9\xad\xf2\xaf\xe7\xf3?\xb3 \xc92\x82|\xc2\xbf\x10u(\xaa\xe0\x8c\xf4?K\x12\xb3\x9b\xb5D\xbe\xbfh8i\xe4\x05\xcf\xf4?m\xf8\xd2\xb8\xc9\xf8\x88?\r)\xff4\x02H\xf1?\xd0\xf6\xbeL\x18&\x9a?\xf8\xdb\xc9\x96\x06\xfc\xf0?D\x9b\xcfwt\xf9\xa4?\xf9\xddB\x1f\t\x1c\xef?tT5\xa2\x04j\xa6?\x17\xe0Q\xf2\x17A\xee?D~\x18\xe4\xacS[?=b\xc4\xad\xc8\x84\xee?\n\x85;\xa28\xb9\x87?^\xce-h\xf3I\xf1?\xa2N\xeePX\xbct?\xc8.\x8e%\xcc\x81\xf0?K\xfcx\xd2\xb4\xc7\x9c\xbf\x08\x83\xc2J\xf6)\xf3?\x96\xdd\xa3u\xa3\xf8\xb9\xbfT\xc9\xf0\xa5-\xa6\xf4?\x1f\x07\x0fn\xd8\x1d\x83\xbf\xe2\x89c{\x92\xa2\xf0?\x90@\xa32]\xfc\xa7?\x9d\xaa\xb3\x9b\xf9\x19\xf0?[\x97\xa52\x12\x1a\x90\xbf\xe8\xdb7\x1b\xae\x8b\xf0?\xbf\x9bs/\xae\xb1\xc9\xbf\xf7\xe1\x15\xd3\x0eK\xf6?_1\xde\x13\xb8[\xa5?\xe8:\x9c\xac\x11\x16\xef?\x8d\xee\xae\xb7\xd6\xa1\xb1?\xea\xb2\x9f\x8d`\x19\xef?\xb3R\x1aWX\x10\x98?o\x19\xfd\x8b\xf8\xf6\xf0?V\xda\xce\xe9<\xect\xbf\xcca\xa7\xc4c5\xf1?9\x8a\xef\xea\xe0\xe4\xae?4-\xe8\x83\xff\xd8\xee?\x18u\xa6A\xf7\xcd\x9b\xbf\xa4\xc2d\x1f\x10D\xf3?*\xa6"h\x1e~\x92\xbf\xe3T;\x18.w\xf1?\xc4\xe7\xdcS\xb7\x1b\xd9\xbf0\xcd\xdd\x15\xe5\xed\x01@\xe0\xdd\x04\x17\xc8]\x95\xbf\x9b\x86/eq\x99\xf4?\xcff=\x96\x18>\x95?\x89J\x1e|A!\xee?D\xef&\x0e\xcbN\x81\xbf(?\x9a+@\xb9\xf0?\xd3[\x9coWt\xa3?\x9d\xa1\x84\x10\xcaG\xee?<\x96i\xac\x18\xa9\xb0\xbfW\xeb\xe5p\x1f\xc8\xf2?D\xc5\xd4\xb9\xc9\xef\xac\xbf\xcfe\x0b\xeb\x1a5\xf4?\x1dy\xf3\r\xacn\x95\xbf\'\xbc\xf3]}\xbb\xf2?\x13\x83\xea\x01\x0c\xaf\xd0\xbfoZ\xb4\x1d\x88\x9c\xfb?@\xcfj \xe0\x03\xc5\xbf{\x9dir\xc3\x13\xf5?\'\xbbA\x18UJ\xbe\xbf\x90\xed\x8fg~\xbf\xf3?1\\\x9dJ\x93u\xb8\xbfz\xe6\xa1\x15zp\xf4?\xc7\x9d>\'Y\xde\xc0\xbf\x01&\x02x\x9b\x80\xf6?V\xf7\xd7a@\xc2\x9a?\xc4|\x1d\xcf\xef\x18\xef? \x05^\x03Y\x7f\x9d?\xc9S\x85\xba]{\xf1?\x0b#\x83A\x89\x06\xbf\xbf\xf3\xd8\xbd!\xfd\xb6\xf5?\x14oA\xa6\x99)\xc2\xbf\xb28\xd3X\x1a\x8d\xf5?d\x0b\x99?\xcdT\xc4\xbf\xb7A\r\x02\xeeb\xf8?\xf7\xa8Q@ \x1b\xb6\xbf\x86\xf5\x15!}D\xf4?\xb9FE\x89\x89Q\x90?\xd9\x0c!\xc3\xb5\x83\xef?\x07\x90\x7fj\xa9\x15\xa1\xbf\x9bD\xbdi\xa9D\xf4?\x8a\x975\x00j\xfe\xbb\xbft\xc3~H\\\xf1\xf4?(en\xf0\xb2\x96\x97\xbfiC\x9e\x8a\x15\x92\xf1?\x1c\x8c\x8e\xf0\xbdQW?\xf8\xab\xdd~\xb0\x1f\xf2?\x9b\xf5)\x16NK\xc8?\xd5\xa6\n\xbe\xf0\xfe\xed?57wN y\xaf?XI\xea\xa7\x9d\x86\xec?al\xef\x7f+Y\xa1\xbft/{=\xe2\xb2\xf0?_CJe\x81~\x96?\x04\x19\xa9\xfd\xaf\x82\xf0?v\x8d\x07b\xb0W\xb6\xbf\xce\xcdY\xe6\x9a1\xf6?X\x11\xbb\x82\x11\x9d\xae?\xc6\xf9\xeb\xdcS-\xf0?/\x86\x84\x13\xdb\x1e\xbd\xbf\xdc\xcfM\xd6\xcf\xd6\xf4?n\xe1\x0f\n\xb44\xb6\xbf\x82\x97\xe1z\xa8\xf4\xf2?\xa3g\xc6b;\xdb\xab\xbf\xc0\x08e\xd4{\x06\xf2?\x02\xfd(*"\xf7\xcb\xbf\x11\xcb\xffR\xaa\x01\xfa?\x19\xd8\xab\x9f\xbe\xa9\xa4\xbf\xa4n.;\xee>\xf2?,?U\xfd\xfe\x1cx?\x7f\xc0\xfd\xee\xb5#\xf0?\x82\xfc\x10\xf1\xab\xdd\xb4\xbf\x87\xe8\xb5\x10L\xd4\xf3?VK,\xd1\x8e\x99F\xbf\xfe\xd9m\xb2X`\xf0?\xe9\x1eN\x99\x1e:\x9e?\xd6\\A\x84\x07<\xf0?\xd9\x83O\xc8v=\xa0?K\xf6\xb4\xfd\xa2*\xf1?\x85\x99>\xfc\x88f\xb1\xbf[p\xbf\xc6I\xdf\xf3?\xfc\x06\xce`3\xbb\xa1\xbfvi|L\x97\xce\xf4?\x9f\x86\xe9I`>\xb4\xbfn\x95\x05/"\xed\xf3?\xd1\xd2Wh\x14\xd6v?\xbd\x99\x12\x90Z\xf6\xf1?\x07\xea\xe8\xe9a\x80\xc0\xbf\xc4G\xa2"\x02\xb5\xf4?\xfa\xc2ue(\x16\x9c\xbf\xf3\xc9\xb0s\x0b\xaf\xf3?j\xa4\xd2)\xb0Jj?\xdf7\xde@^*\xf0?\xbc\x90|F\x08\xba\x97?:\xaa~\x99E+\xef?\xa7\xa5\t\x16\xb6\xd0\xa8?\xac\xdak\xef\x88l\xef?\xf4\xf5\xfe\x96\xa0|\xb3\xbfA;w\r\x17\xa2\xf3?\xaf\xca\xd2i}\x18p?\x01\xd4\xcai^\x00\xf0?\xc1\x8a\x0082\xbf\x8e\xbf8\x8a\xc8<\xc6\x1b\xf3?S`\x1fv\x05@z\xbfD\xc1z\x17\xd8x\xf0?\x86q\x8e?\xfbtv\xbfK\xaax\xd0\xe7\x8f\xf0?*\x91\xf9\x9e\xd8\xdb\xd6\xbf\xe30\x92r\xb0\x18\xfe?\x0ctzph\xc4\xaf\xbf\xec<[`c\xfe\xf2?\xb4\xfd\xf12\xc9\xdd\x95? \xa6\xd3J\x1d\xaf\xec?A\x02y0\xff5\x89\xbf\x06\n\x89\xef\xc9\xad\xf6?<\x8b\xb0L8\x94\xa1\xbf]m3\x00\xfe\x8d\xf2?m\xe6\x1e\xaa\xeec??\xd4Dt\xdfa\xc3\xf0?\'\x98\x0f\x92yc\xb9\xbf\xfb~\xbbHX\x1e\xf4?'
p27
tp28
bag2
(g3
(I0
tp29
g5
tp30
Rp31
(I1
(I2
I128
tp32
g12
I01
S'\x05\xfb\xda\x9f?\x9aZ?L*\x878\x8eJ\xf0?\xca\xbc\xce\xcf\xb8\xb4\xc1\xbf\xe9Z\xb4\x87\xf8\xb9\xf3?\xa0P\x10\xa5$\xf1\xd4\xbf\xf9\x901\r\xf0\xb3\xf9?\x13\x96D>2o\x97?\x08\x91\xf9+I8\xf1?\xd1\xd9+n\xc0q\x91\xbfZ\xa6\xaf\xb4\x96\xf6\xf1?e\x84\x1b6\x974\xc1\xbf\x9c\x82\x86"\xefL\xf3?\xbf\x92\x110sl\xa9\xbf\x9b\x10\xf8\xc8^\xac\xf1?\x88\xdf4#:\x14\xa7?\x05\xc3\x1e\xa2\x8b5\xef?\xe4\xba\xa5\xde\xec\xbe\xc2?\x18\x8f\xb9\x86\x97\xef\xec?]\xe8\xe7,~\\\xb1\xbf\xfb \xf7\xb8\xb2\xe3\xf1?\xb7\xa9I\x12\xd9\xa1\xe5\xbf\xf1\xa2\x89\x14L5\x06@4\xfaX\xea(\xe5\xa0\xbf\x0b\xd9\x9c\'f\x7f\xf1?\x1f\xb2[\xcfL\n\xcd\xbf\xdd=@\xc7\n\xa1\xf9?\xea\xbfe\xe8\x7fo\xa3\xbfs\xacr\xad9k\xf1?\x00\x81\x036\xa9]\xd7\xbf\xdf\x80\xb3f\xe0z\xfd?\xfb\xcd{m9\xd6\xc7\xbfP\xf3\xc7\x9d\xf0B\xf5?.d\xed\x7f7\x84\xb1\xbf\x89$\x15\xf0p\xd6\xf1?\xb8\x06\x81\xba\xfa\xee\xc0?\xe33\xe9\x88\xefW\xe5?Ah$N\xf1\xc9\xc4?\'\xb8\x8e\xf6\x01\'\xed?\xa7\xea\x88\x90\x95\xe7\xdb\xbfXf8\x02\xa7\xd6\xff?\x11U\x81\x03\x9a\xa6V\xbf\xf4\xf1\xd2\x1ftM\xf0?i\xb1\xc3\x0f\xf7\xe9\xa4\xbfH\x13\xbf\xf8\xec*\xf1?f\x11,V\xaf\xd3\xb5\xbf\xbeI8T\xabH\xf2?\xaeQ\xadB\x99X\x96\xbf\x9b<s\x9e\xed\xcc\xf0?^[\xb5\xcc\xc6/\xd3\xbf$x\x92\x96\xb2\xf1\xf9?\x84\xdcQ\xd4\xaa\x1e\xd2?\x18\x85\x01\xef\xb2\x9d\xea?W\xd0:\xd4\xca^\xc9\xbfX\xad\x93e\xd6\xb7\xf6?l\x85ihR\x1e\xdf\xbf \xba\xc3\xb5\xbd\xae\x03@\xbb\xe7\x08Q\xf4;\xc5\xbfn\x05\x08q\xbe\x08\xf3?{\xa0%+b\t\xae\xbfd\xae\xe7\x83h\n\xf2?\xbb\xd4e\x05\x04\xad\xd3\xbfl\x82\x1b\x06\xc0\xd4\xf8?8\x00_\xcfI\x14{?nt\xa3\xc2m\x04\xf1?\xd5\x0fw\xeaT;\xa1\xbf\xc1k\xdb\xd3\xf5f\xf0?{H\xc1\xd9P\x8d\xd1\xbfNzt\xf7\xa00\xf8?qq#\xcb\x91\xcd\xc1\xbfdy.+\x9d\xce\xf3?\x80y\xac\xd8L\x9b\xaf\xbf\xc0\x02\xe6\x02\xcfT\xf2?]o\x9e.\x97\r\xad\xbfj\xac\xdd\xb0`\xe9\xf2?\xac\xb4\xec\x12\x97Z\xce\xbf"xU\x07tP\xf4?"\xba\xa4ar^\x81\xbf\x90\x06\xa4\x99\xa2K\xf0?\xe8$2Sm\xae\x93?\xc7Z\x1a\x86\xa8\xe3\xf0?K;\xda\xfd\x12\xaao\xbf\x11\x11K`e:\xf1?\xce\x8a\x0c\xe5\xaah\xd6\xbf-\xee\xb6C\x91$\xfa?:\xce\x15j\x07P\xd8\xbf\x90\xc3F\xb5d\xcb\xff?\xbb=\x9c\xb0\xb4\\g?\x0f\xa3\xe2J\x90[\xf0?\xf4z\xbf/\x9a\x02\xbd?\xca>\x89A\xc8j\xed?,\x06\xb1\xe1\n{\x9a?\xe6M\xc3PR6\xf0?"\x84\x9e\xd3B\x96\x8f\xbf\x1b\x0cW\x98\x1e#\xf0?\xd9\xef\xb7\xbf\x11X\x84?Z\xd2\x97\x8d\x0cV\xed?JE|\x90\xef\r}?\xab\x94v\xed\xe1r\xef?n\xdc>L\x9bM\xad?\xafL\xc5dl\x8c\xe9?4l\xe4\xe0(\x9an?~\x86\x83\xae\xe3\x90\xef?\x9fY\x7f\xec\xee\xb9\xc2?j\xc6\xb6\x88Da\xec?\x92m\xd3X\xae\x9c\xa9?\xc2\xbb\x82\x8e\x96\x15\xf0?G\xcb\x06\x80:\x9b\xc7\xbf\xb4oI\xb4\xc7\xe3\xf7?\x06\xbby\xc9NY\x92\xbf\x94{\x01\xb1\xb9/\xf2?\x8f\x0b\x85\xa2\xe6b\xd1\xbf# \xa7wl\xab\xfa?\x9f4@\xb2<\x0f\xd7\xbf\xad\xa3\x82L\xc8\x8c\xfa?\xa2\x87\xb7\xdcFd\x90\xbf\xa2\xe5$<\xbe\x83\xf0?\x98\xac\xa5+\xfb\xe9\x94\xbf\x8c\x87q\xb5v\xe9\xf0?|\xb7Ma\xde\xf2\xbb\xbfX\xacG\x0f\n\xde\xf2?\x19\tS\x83\xe3#\xdd\xbf\x9f\x00_2\xbaF\x01@\x01\xb6\xbf\xea\x07g\xdc?q\xd6\xbeJR)\xe2?B\x81N\x87\xb4\xa0\xbc?g\xd5T\x8b\xa0\xf1\xed?\x86\x81\x0b\xbd@r\xa0\xbf\xbd\x08\xf0\xfc\xcdW\xf1?s\x83\x04\xc4R\xb3\x95?\xa2\x1c\xad\x8aU\xf4\xef?\xe5\x03al\xc1\xdd\x88\xbf\xd0z\xe7\xdc\x0b\xd1\xf0?\xb5MK4\xc3\x04\xa5\xbf1\xa4\xb3\xf6\xb78\xf1?\xa2\x07\xa8\xf4{\'\x8a\xbf\x12\x8b\xb84gP\xf1?\x86]\x9a\xf8\x8d\x15\xd8\xbf\xcd\ns\xec>\xc8\xfd?\x85\xfc(\x17\x9eq\x9e?\x84\xe3\xaf\xb3\xcb\xf5\xed?\x81\x91\xd0;\x15&\x87?"^X\xb7f\xed\xef?N\x8d\xda\x963\xfc\xa5\xbf\n\xc2\x90\xc5(\xd4\xf2?\xc1\x9eqR\xac\\\x9e\xbf\xd1D7\x19z6\xf2?c\xd0lE\x17"\xa1? hW\xe4\xa2-\xf0?\xbf\x9e;\xa0\xc0\x18\xcf\xbfy\xe4\x03\xd6S\xa8\xf6?\xfd\xe7C\xe6*3\xaf?S`\x00\x9f\x8b\xd9\xf0?\xa3\x1d\x1c\xe4l4\x92?\x9cb\xed\x84Z8\xed?\xc6\xf6\x8a\x1c8\xf0y?y\x91\xc8\xd6@\x8a\xf0?\x055\xa8\xd0\n.\x94?\x1c\x13>\x8fd\xb0\xef?\x0f\xc4\x90\xb3+\xd2\xb8?\xdc\xd7\xd5I\xaa\x12\xe8?\xc4\x98\xcc\xb1vb\xca\xbfF\x8eY\xd9\x10$\xf6?\xa1\xe1\xf4\xe2\x08\xd2\xe9\xbf\xe0=c\rb\xd5\x08@\x9dC\xf0\xed\xb3\xc1i?@\xe7&\xcd[\xb1\xef?\xbfsG\x82\xb90\xb2\xbf7Z\x14\xd5\xd9o\xf1?-\xc9}\t\x90-\xcf\xbf\xf5$\xc4.\xc5\xe3\xf6?\xbbO\x88\xf0\xb5O\x93\xbf\xe6\x81\xba\x98\xde}\xf0?\xa1\x8b\x16\x03\xb4\xf1\x81?=]\x85\xa8\r&\xef?\xd7b8\xa5\x98\xf0\xb9?\x9bp\x95\x8f\x96\x13\xf0?,\xba3\xd1\x0c\xaf\xe4\xbf\xd5\x90\x05\x1b(\xe9\x03@\xb9-r\x1b\xe0\x05\x90\xbf\x9dyx"\xc99\xf0?\x950\xea\x85R\xf0??\x07C\xc9\x07\xe0\xdd\xf0?\x9a\xdb\x01\xb9\xce\x0b\xb1?\x19\x91\xde\x88\xf9J\xf0?\x189\x15\xe7v+\x92\xbf9\xed\x08\xe99\xe0\xf0?\x01\x1a\x15\xd9\xafP\xc9\xbf4\xfd\x0f(\xb2\xa6\xf6?\x13\xa1\nX\x9ff\xaf?\xa7\xa9\x8dI\x0e}\xf0?)\xc6Q@\xf5P\x91\xbf\xb9\xc4<\x15\xc5\xaa\xf0?P\xa3\xe1\x06\xd7Cr\xbfUS\x92P\x9a\xf2\xf0?\x7fJ\x01\xd5\xf5Y\x85\xbf\x8c\xf85\xfc\x1b\x07\xf0?\xbeJ\xc1\xa9j@\xa6\xbf\x96z\xa8\xe3\xb9+\xed?\xf1\x8f\xb5\xa1\xdc}\xd9\xbfs\xe5\xe7\xcc\xa9\xda\xfb?\x04\x11\xd0n\x8c\xac\xd2\xbf2\xfa\x90\xf0\xe3\x94\xf7?(\xed\x9du\xad\xcc\xd4\xbf\x98\xe2\x81^\x01\xa1\xfb?\xd5fc\x9f\x8f\x1fO?\xe6\xc4\xfe\x9b3+\xf0?\x17w\xf8\x02\xd6Kw?Rl\x02\x8e\x84n\xf0?\x18\xee\x99\xec\x96\xaa\xb2\xbf0I^\xfd\xd4\x97\xf2?$X\x1f\xbc\xcf\\k?\xb2\xe0`\xecZ\x1a\xf0?\xf9}\xa6\x02\x87\x97T?r\x8f\x84}N\xad\xef?Dp(\r\x8b\xea\xb2\xbf>\x85\x00\xe2\xef\xb8\xf1?\x7f_\x01\xeb\xcd?\xaa\xbf \x9e\x1d2Z\xb0\xed?\x00\xe4\x19\xd3\xe1\xcf\x95\xbf_\xccU\x15\x83\x97\xf1?ju\x18<+\x8e\xa8\xbfWT\x93\xfc\x97b\xf2?\xa5\xd7\xfa\x01\xd7\xff\xae\xbf\x94\x91p\x8d%\x93\xf1?\x92\xa8\xb6\x9d\xa1\x7f\x9b?\xc1\xef\x11\xc5O\xd7\xef?_\xde\xbe\x01v\x8e\xd0\xbfl\xde\xb7\x9bD\x03\xfa?\xc7\x0f\x02\xfe\x17\x90\xa8\xbf\x87\x80\t\xac\xb2^\xf0?\xfem3\x8fI\xf8<?\x1a\x15\xbc\x98\xcc\xc6\xef?\x89\xc3y\xbc\x0b\x07\x92\xbf\x1f\x8e^J\xfe\xbc\xf0?\xc9+91\xac\x15\x84\xbf !\x1d\xf5\xaa\xf4\xf0?5\xf1\x9a\xd5z\x17\xb2\xbf\xb6\xe14\xb4DW\xf2?\xb0\xac\xef\xf9\xf2^\x88\xbfn|C\xf4\xb1\x13\xf0?f\xd3\xdd\xd3AK\xb6\xbf\xf5Y9lvc\xf3?\xc3\xe9\x013\x97\xefk?M\xdbC\xad\xf8\xe6\xef?1\x8b\x85 {\x8c\xce\xbfO!\xfe\x120\xed\xf5?g\xa9u}/\xe9\x98\xbf\xb0\x1c\x9e\xf6]\r\xf1?\xcc\x15\xb3\xbfkO\x9a?\xd3:#\x84\x93L\xef?\xf8\x8eUz\xec\xe6\xd3\xbf5/k|Q\xad\xfa?c\x0e\xa2qv\xb8\xa5?+x\xccx?t\xf0?j\x1b\xb5\xe8\x7fi\xab\xbf@\'\\\x1e\x16\xdf\xf1?'
p33
tp34
bag2
(g3
(I0
tp35
g5
tp36
Rp37
(I1
(I2
I247
tp38
g12
I01
S'2)\xb8\x12\x82\xc6v\xbfI\xac\xbeNn\xd3\xf0?[\x06y9\xea\x8d\xbc\xbfV\xdf\x9d\x92\xeb\x17\xf3?\xc6Df\xf7\x95A\x9b?\x00c\x01\xab\xcb\x1a\xee?\xe9\x02\x9bj\xf7\x1e\xbf\xbfO\xd1\x97\x19\xa8`\xf7?\r\xc1\xbb\x8a\xc3\'\xdb\xbfTA1O|\xa2\xfd?\xfe\xd8\x1ec\x7f[\xb1\xbfc\x04v?\xa7\xf3\xf1?j0K\xbb|%\xc0\xbf\xbb\xa9j\xfc\t\x19\xf2?\x92\xed\xd5\xf4\xe4\xd1\x8e\xbf\x98\xcb\x14\x01p\xc3\xef?\xc0\x05\xcc(1\x8c\xd2\xbf\x1a\x9e\x8dU\x03\xeb\xfd?n\xb4\x885pKm?AC7\x95\x88\x1f\xed?\xd9\xd5\xea\x0ch\xe3\xd3\xbfR2\xa3\x0fQ\x15\xf5?\xb5\x021\xb8\x89\x8a\x85\xbf\xd2\xdfa\x93\x95#\xef?\x9b\x16\n\x16\x97\x14\x91\xbf\xac\xea\xa1E\xbbH\xef?\xd1\x12\xc5rG\x1b\xc8\xbf\x83\x02H\xa0~\xa7\xf1?~l\x08Q:\xbc\x91?\x08\xbc\x17f\x9b\x17\xf1?\xca\xa8`U,\x02\x87\xbfw\x0b3%\xca\xd8\xf2?&\xf4\x16#~\xa9Y?\xae\xbdD}<\xd7\xef?[(`\xc2etl?\xf5p\xb7\xe4\x1b<\xf0?\x0c\x84\xe9\xd5\x9esv\xbf\x83\x8cm\xcdo\x02\xf0?6\xe5\xeb~\xf8\xf5\x9b\xbf^\xe3\xca\'\xc7\xbf\xf1?\x98\x9b\xab\xb2\xf2\xc6\xd1\xbf$\x8a|-1\xa0\xf6?\xbe\x92\x07\x8bvD\xc4\xbf\xc9\xd2Y\x9c\x88\xb1\xf2?\x08\xa8\x11\xb1*\x97\x8d\xbf8\xafo\x17\x0b\xd7\xef?\xcf\xc2\xdb4\x98\x93\xd3\xbf8\xbap\x96.\xd1\xf4?\xd8XQ\xe8\x03Q\xc5\xbf\x06\x96\x99\xfe\xf1\x1b\xf2?\xfb\xb0\xc9o\xa3\x9d\x99?\xe6[m\xc1\xb2\xa7\xef?\xfb\x83\xcb\x14\xf8z\x93?f\xcd|\xb6\xcd\xe1\xef?\x8b\xf1Q\x82k(\xa0?g\n\xb8\xf6\xaa\xe9\xec?\x02\xbf\n\x96;\xac\xab?\xea\xbf6U\xe4\\\xf0?\xf8\x9fM\xaf\x7f\xa6G\xbf#\x0cnr\x9a\xf5\xf0?@=\xe6\xec\xac\xd6\xc5\xbf\x0b\x9c\xd5\xae\x01h\xf3?\xa4\xb1\x9b\xedN\xab\xe9?\x0b\xab\xd0\xf0}\x08\xd5?<\xd8%\xf9\x81\x92\x9b\xbf\xfe\xea2V\x0e\xe9\xf0?\x8e\x04T\x14\xeb\xc2\xc4\xbf\xfc\xde\x14\x121\x1c\xf2?v\xd6\x11\xcd\xd7\xd2\x9b\xbf\x90~\xd2\xe0\x07\xf5\xee?1\xfep\xdd\xc5+v\xbf\xe4Pj\xca}6\xf3?\xc1\x0f\x12=\xf9\x96\x8c?\xce\xfdF\x9er\r\xef?\xffi\x1c\xcf[k\x85?!\x8f\xe5\xae- \xee?+o1\xc2L\'\xa5\xbf\xd4>\xb8\x13\xf1%\xf1?\x9e\xde\xde\xda\xa3#\x82?\x0eUN\x1b33\xf2?k#\x8d\x8e1b\x91\xbf\x1eBOAl\xdf\xf0?}7\xeb\xd6\x98l\\?\xde\x98\x8ch\x1f\'\xf3?X\xe59\x1bu%\x8d?\xeb\xeeA\xbd\xf2\xd1\xef?O\xec\xb9jy\xc1\x93?\xd0\xcc\xa8D,\x9a\xef?\x8c\xb0\xf1\x12\xa7\tN\xbfjC\x9c\xff]\x7f\xf0?x\xc8\xcdP\x1b\x15\xd7?\x0fU+\x89\x10\x19\xe6?W\xe3\xb3\x8b\xa2\xe9\x90\xbf\x02\xb4?\xbd\x9d\xd6\xf0?\x01\xf09V\xa5\xb4\xcd\xbf\xc1\xe9\x1cUU\x19\xf4?\xc4\xe3\xb0t\xf4}4\xbf\x0b>\xd6p>\xf1\xef?\x9f\xe9x\xf0\xd5\x86\xc5\xbf\xfbB\r\x89\x8bO\xf4?\xdb\x12n\xedL\x0f\xcb\xbf\xd2\xe5\xc2q\x81\x80\xf3?\xa3\xafU\x11\xdf{\x98?\xc52\xd0\x9eo2\xf0? \xe1\x92Vv\t\x90?\xebO|\x89\x00\xcb\xf0?\xdb)\xaeuU\xba~?0s|\x14g\\\xef?\xcd\x8a\x8f0[|p?\x9c2\xf1\x0c\xc5\xe9\xf1?\xcf3 \x90\x1a\xb6\xa3\xbf\xf1\x99\xech\xd1\x89\xf0?\x8ax\xbdB\xc2u\xa6\xbff3+\xaf\\\x18\xf1?\xd7\xc7\xaa\xc5\x9b\xb0\xd0\xbfdX\x13\r\xc7\x0b\xf6?\x0f\xec3\xed\x18\xe27\xbf\x92\xb3\\\xd82}\xee?B\xf9/\x0et\x8f\xd0\xbfPYx\x15\xc2\xbf\xf4?\x17\xc5\x9b\xa4\xdd\xb1\xb4\xbf\xb9\xfc\x9d\x01\xa0q\xf1?\xf1za%\xfc\xfa\xae\xbf$ZD\xf0<\xee\xf1?fb\xdb\xb1\xc9{V?<z\xd2\x12iT\xf3?\xa0\x04\xcc\xc1\x81\x8f\x80?\xce,\xf2\xb3G\x07\xf0?5\xda\xbd!=z\xd0\xbft\x05@\x04\x19\xe9\xf5?s\x86\x19\xfd\x1a\x04\x88\xbfc>\x9a\xa0\xfd2\xf0?\x1c\x96\xc2?\x1d\xd4\x93?\x04\xcbh\xec\xfcu\xf0?\xe2G\\\xf9\x93V\x98\xbf\xd9W\xb48W\xb2\xf0?\xca\xeb\xc5\xde\x05F\xa4\xbfd\xa1n\x80\xear\xf1?\x14S\x90\xa0Q)t?4\xf3q\xf5sn\xef?\xa4\x92\xf4z\x98\xf6|\xbf\xb8\xc9Q\x18,\x0b\xec?\x1aLUt\x19\xdb\x9e\xbfj\x7f=i\xee\xc9\xed?\x1c]\x84\xa2N\xe5\xab\xbfcH*\'b\x81\xef?\xeco_\x9d\xca\x10\xd0\xbf\xd1\xbdh\xaa\x13f\xf2?~6\x0fj\x98\x16\xcb\xbf\x04\x94 =\xe5\xd5\xf5?L56/\x8d\x9f\xa4\xbfB\x9d~\\\x908\xf1?\x89\x82\xf2\x95*b\xb9\xbf\xda\xfa0\xc3\x18\xaa\xf3??\xa5\xb3\xe8\x13\x86h?Jp\x83\xa9\xb6\x1e\xf1?6\xfc]\ro\xfc\xab\xbf\x94\x03\xc8W\xe5^\xf2?\xd4\xfd\xa6\x06\xfdm\xa5\xbf\x82[(?P\x80\xf2?O\xd9"\xbdZ\xc3\xa6\xbf\x13\x13\x13\xadCb\xf3?\xf5\xd5\xd09\x0f2\x8e?\xbaw}E&8\xf0?\xcbNZzoB\x85?\xae\x88\xeeJ\x92\xc6\xef?\x9b\xfd=\x85\xd1~\x9b?\x0fj\x1a|hC\xef?Uq\x05+\xf3\xea\xb5\xbf"W\xba\x92\xe4\xd9\xf2?6\x888\x8a\xe4\xc3h?\x11\\\\h4S\xf0?3\xb4b,\xce>\xcb\xbf\xde\xa4\x03\xd8\xd6\xc4\xf1?\x054\xd8\x14\\\x85\xc1\xbf\x1a(\xd3\xf7\xe7\xfa\xf5?DyP\x88-\xaa\xd2\xbfA\x80FplH\xf3?|0\xd1\xe9\x84!\xa1\xbfUI\xa1\x1bH\xc5\xf1?\xc3As\x0fDK\x88?O\xab\n!)\x02\xf0?\x9f\xe2\xac\x87\x94\x98&?@\xf2\xb6J\xc3t\xf4?\x1c@\x91\xf8\xe2\xd5\xb1?_jqV=7\xef?m\xe7\xc0\x8a\x1bU\xbf\xbf,\x1d\xc2x\xf6\x8e\xf4?L\xca3\xe5M\xfe\xce\xbf\xb2\xe9\xdb\x16\xdc\xb8\xf8?\x06\n^\xf3\xff\xaf\xb5\xbf\xb949\xec;C\xf3?\x95\x9c\x18.k\x0e\x9b\xbfG|\'&\x91\xa7\xf2?\xdfl\x9aW\xa7\x92\x96?\x04\xbe)\xf6\xc1<\xef?f\xb1\xc5\x824^\x1a@i\xac\x8b\xf7\xa3B\x0f@\xc0\x02\xf4N\x14\x8az?\xf7\xebF\x95\x9cN\xf0?@k\xef\x9cX\x0f\x86?\xc3l\xf0=\xbe\xfc\xee?Y\xfeV~Dk\x92?L\xf1\xce*\xec\xa4\xf0?]M*\x1d:\xc0\xd1\xbf\xdf\x04\xe9\xc9kP\xfc?\xc8\x8a\xf9\xb1$r\xa6\xbf\x90\xd6\x9a\xce\x02\x1f\xeb?\x08\x80\xa0YU\xa9\x9d\xbf\xc6\xa5\xd6\xd7\x1e\xd8\xf2?\xdf\x88\x12@B\r\xa4\xbf\xa7\xa3s\xb9\x93\x85\xf4?;2\xc0\xb8\xd5\x12\xa6?\xd7w1\x12\x17\xa0\xef?\xb7-\xdf9U\xe0\xb2\xbf\xacu\x0f\x1cE\xb1\xf1?L\x08\x0fD{\xfd\xc2\xbf\x9au\x0e\x86Uw\xf4?\x1e\xb7\xa3U\xd1\xa4\x95\xbf\xfc\x8b\x83\x9bo\xf0\xef?b\x88A\x85\x97Y\xac\xbf\xd9\xf4\x00\xe3\xcc\x10\xf1?z\xdc\xc7\x9e2Y\xd4\xbf\xa4\x87P\x0cf\x84\xf4?X\xbf\xb4\x10&\xf1\xb4\xbf\n\x00r1\xe8\r\xf0?%\x12\x1a\x13\x07R\xb0\xbf\xf0\xd9^g\x82\xbe\xf1?e\x00\xf0\xfa+\xb1\xa1\xbfG\xff\xf5\xf7\x08W\xf1?-\xe5\xc8AQ\xf3\xc0\xbfNr\xd9\xa0\xa5\xd5\xf3?\x11V\xbc|\xc9i\xb4\xbf\xab*x\r9\x1b\xf2?bcI\xa3"\xbd\xce\xbf\x9cm\xb0\xba+|\xf8?\xb0)\x9e"\xa4\x10\x82?\xba$\xfd\xa0\xd3i\xf0?\x11\xa8\x8dY\x19\xe9\xaa\xbf)\xaf\xd6\xba\xe8.\xf3?\xcf\xb1\xe9\xb9\xecx\xda\xbfvQ<\xaf\xf0\xc9\xfb?\x1e\x9b\x97u\xfe\xcc,?\t\xf5\x00\x0fu\x08\xf0?\xe3n>Di\xe8\xa2\xbf/\xb3\xa2\x0e\xbf\x8d\xee?H\xae+\xa8\xedk\x9a?\xb9A%\xaf\xe9\xd6\xef?B\x08\n\xb5\xb1\x17\x86?\xfbJ\'\xec\x12\xb4\xef?S$\x1dq\x8d0r?\xb6\xea\xd3h\xe6\x19\xf0?\xc4S\x94n\xf3\x1a,?\xd7dE\xad\xac\x94\xf0?\xa2d\xcb\x92J\xb9\xb3?$\x96\xa1+F.\xf4?S\xf8o\x16\x80:\xe1\xbf\xd9\xb7\xb1\x16\x8c\xc5\x01@\x80\xcc{f\xf3\xfe\xb1\xbf\xa9P\x1eV\x03X\xf2?5\xc2!\xbd\x84FT?\xfd7W\xe3\\\x83\xf0?\x1f\x13\xb9\x8an\x8f\x98\xbf\xddU\xf1\x1d\xd6i\xf4?\xf2\xec\x96\x9b\xbb\x01\xc0?\xb6T4\xac\\\xe7\xeb?\xfd\xc3\xd8\x9e\x92\xac\xc3\xbf\x99\x1cJ\x14\xb1\xf1\xf2?\x13\xb5.\x80.\xfc\xf0?\xa5\xfe\x15\xef\x05\xa8\xc3\xbf}+[*\xb4c\xc0\xbf\x17\xb8\x7f`\x19\x1a\xf3?4\x134z\xc4\x17\xbb\xbf\x80x)\xfe\x9a(\xed?p\xbbfs\xcd_\xbd\xbf\xaeHA\xbc\x7f\xfb\xf5?\x8c1\xc2\x96\x07o\xa1?\xbb\xce\xfe\x8aK\x03\xf1?\xca\xbd\xae`(\x04\xb4\xbfXf\xb8\x8d7\x8a\xf2?\x02\xb90\xfdX\x97\xa2\xbf\xc4\xf0d:A\x9b\xf2?\n\x05p\x90\xf1Vd?\xe1\xa2\xe8\x04\x9e\x17\xf2?\x19\xd7\xe6\xacqn\xd1\xbf\xe4\xa0\x1f\x889\xda\xf3?\xd9\x83M1\xdcC\xc4\xbf\xe9\x8a\xa3s\xc0@\xf3?j\xe0w\xa0\xa87\xd1?\xa2T.(\x88Z\xf7?\xf6\x17\xe5\xbf\xea\t\xc6\xbfY\xc3#\xfb\xaf+\xf3?\xd1=\xf49\x04yE?U\xf4\xc9\xce!#\xf0?N\xbc\x15\x02\xbd\xcd\x95?\xe7\xd6|\xca\xc6C\xef?:\x02\xe2\xe1O\xdc\xc1\xbf\xa2\xa4\xf9\xdeAR\xf5?[YXY\x90<\x84\xbf\x17\xe7\xbb"m\xb9\xf0?t\xcd2r\xf9}H\xbf1o\xa3\x06:b\xef?W\xa1-\x06\xbdom\xbfU\xd2\xa0\xe4\x92\xea\xf0?\nT\xf7\xf1\x07;\xb6\xbfS\x9c\xd0 PK\xf5?\xb3\xae\xc5\x8b\xc0M\xcf\xbf\xdd\xc1\xfa\xcdO\x98\xfa?Q\xc8\xfc\x12\xa5\n\x90?{\xb2*\xe8\x19\x8e\xec?\x02\xee#|\xcf\x00\xc2\xbf\xab\n\xa5<o$\xf2?\x7f^\x7f\x1b:\xbf\xa8\xbfP\xb1\xd0b\xe4\x9c\xf1?\x03\x8e\xca\x13\xddk\xb2\xbf%t_\xaf\x154\xf2?j\xd6h\x02\xbe\x86\xcb\xbf\xeb]\xf5\x93v\xbd\xf3?xi5D\x84\xfc\xb2\xbfX*\xe1k\x04\r\xf1?\xa1\x01\xf3~T\x1e\xd2\xbfZ\x19\xf7\x17Q7\xf4?\x13\x81: K\x8a\xb1\xbfW\n{\xb51\x94\xf4?k\xb7\x95Ki\x0c\xcf\xbfB\x9f\xd6\x1c i\xf9?y\r5^\x0b\xd8\xa8\xbfv\xcdWk\xdf\x9a\xf4?szx\\\x16g\x8f?\xee%\x7f\x01%\x9e\xef?\x93P\xe5\xfd\x99\xfc\xa6\xbf\xfa\x1b?\xf0\xbd\x12\xf1?B"\x04=\xde\x13\x92?X\t\x8d,\x8c\x8e\xfa?Y\x95\xcd[\x16\xb5\xa8\xbf\x05O\xfe"\xb7O\xf3?t\x8f]\xcc\xee\xda\xcc\xbf\xca\x95\xe9\xc8\x89\xcb\xf5?\xe10\xb7\x01\x84\x86\x95?\xa7\xf4\x05aB\xd2\xef?\x15\xa6\x05\x1cG\x07\xb0\xbf\xf6%:\xfdP\xa7\xf1?\xeac\x99/\x01$\xb3\xbf\xa8\x08\xf7d\x7f\x03\xf1?\x93%\xcd\xa1\xd4s\xb0?I\xb6\xf79*\xe9\xec?\xa3\xc13\x1c\x11\xcf\xb0\xbf\x01\xdd\x9a\xf7bB\xf2?\xa2\xf49\x1b\xcb\x05\xc9\xbfh`H\xb2\xe8\x8c\xf5?\xc4\xb3\x00\x81|\xd8\xd0\xbf8d1\x8a\x96m\xf6?v\xfe\xa3\xc5\x9c\x1fi\xbf\x92(c\x82\xf6\xa6\xee?\xc7\x84\xc0q#\x06\xaa?%\xa7\xceU\xff\xe1\xef?\x8e\xad\x00\xe1\x8c\xb4\x87?\xa6\xb1\x0c\x8fEr\xf0?\xbb\xb5\xc8\xb6(\xcf\xd3\xbf\xed>\xd95!~\xf7?O\x03[\x0b>\x82\xc3\xbf\xc2\xf9\xcd\xb98\xcf\xf5?\xd1\n\xe1\xd6\\V\xb4\xbf\xcbP\x96N\x90_\xf2?F\x1f{\xca\xf0\xad\x93?\xac#\x85\x8c\xebX\xf1?\x85&\x0ep\xd0\xf5w\xbfK\xff\x0b\xec\x99\xe3\xf0??\x8e\xd7\xd4\x99\x0c\x89?7\x8b\xe5\x00\xf0K\xf1?\x19\x9at\x1c\x14L\xce\xbfFX\xbeU{\xfd\xf2?3\xd8\xf2i>kq?v\x02\xcb\xf8n\x0b\xf0?\x88\xc33Jg\xe8\xa9?I\xb5"\xc0(\xe2\xed?\x9d\x18\xf3\x12\x98\xe2\xa8\xbf\x94\xfe\x0b\xfe5)\xf1?\x1e#\xb0\x88\\\x9b\xaf\xbfLl\xd7\xce\xdf7\xf2?\x9c\x95\xa2\xdb\xb0\xbd]\xbf\x7f\x92:\xb9\x8fE\xed?7\x067\x11\xad\xbc\x9f\xbfq\x08\t\xc2\xdeN\xf1?2\x9c\xcfbZ\xa1\x94\xbf\xbf\xc6\x07\x87\xf2X\xf2?\x87\x1cW\xfe\xa8\xca\x8f?(\x8b\xee\x8fd\x04\xf0?\x8f\xfd\xf1\xa8l\x0c\xa7?\x00\xdd\xcb\xd1\x814\xef?\xfbS!\x9c\xec\x0cv\xbf\x89\x8c\x04<Y\xc0\xed?YU\xb3\x1c\x93N\xb3\xbf+\xb6\\\xdczM\xee?\xe0t\x97\xb7\xcc7\x90?{R\xc61O\xd9\xef?\xd6\x98\x90T\x0b2\x8b?\xc8C\xadmRd\xf0?\x91K\x1e\x96\x95\xc5\xc9\xbf\xf9_\xc4\xd7\xe2\xb6\xf4?\x8e\x8a"T\x7f\xfa\xc5?\xc9\x13\x97\xc8^\xd7\xf2?x3;N*I\xbe\xbf\x1b\x17\xd7d\xbf\x85\xf5?<\xb1\x81\x15+\xd3\xc0\xbf\x7f\xe54\xe2\xb2\x8a\xf4?w\x1c\x93\xe9\x9f1e\xbf\xa3\xa4 \xfa\x1ak\xf0?rw\xcdX\xac\xcd\xa4\xbf\xc4Z]cv\xea\xf0?\xab\x0e\xf8\xfa\xacq\xba\xbf\t!,k\xffC\xf0?\x85\x17*~\xa4z\x83\xbfuhl\xa2\xd2\x9b\xf1?\xd1\xfc\xf1\xad\xce\x8bj\xbf\x87\xbd\xb9\xf0\xb4\xb6\xee?=U\x80\x06H\xf6\xcb\xbf\x9e0\x15dsW\xf4?Z\x86\xf8\xd5\xc9\xbd\xbf\xbfD\x9dE\xe4\xa9\x89\xf3?\xf6\\\xcb\x85\x81j\xad\xbf\xca\xbf\xab\xde?!\xf1?$\xa7=\xa7@\xd8\x99?\x9a\xb41\xff\x8f\xf0\xf0?\x03\\i\xb4\x8d\'\xd2\xbf\x10-\xdd\x86\xf2\xfa\xf5?Q\xeb\xfb\xb3x\xa8\xac\xbfK\xa0\xc3*\x1a\xe0\xf0?>\xd6\x0bP?\xf0\xb6\xbf\x1f\xc2\xf3\x19\xe4x\xee?%o\x07K\x0e}\x95?\x10z\xaa\xe4E\x94\xee?\xfc\xd9\xbbq|\x8e\xc4\xbf\xa4\x86\x92Q:r\xf1?"=\t\xea\x0bz\xc1\xbf\xffh\xb5\xe1\xe5\x8e\xf3?\xe3\x0c\x1ciU\x9e\xbf\xbf\xfb\xfc\x05\xa3\x02\x94\xf1?q\xe4\xfeV\xc9\x1e\xa3\xbfp\x05\x16\x80\xe0\xb3\xf1?Q\xbc\xed}/A\xa5?LS\xdc\xf8[-\xed?\xdf\x84\xc6]\xe0\xe9\x9c\xbf\xb7Pq\x97\xe7\x15\xf1?k\xa2\x11\xc5\xfb\x96\xb6\xbf\xff\x9d\x10I\xde\xf3\xf2?9CS\xb6\xd8\xc6\xb6\xbfw\xfbq\xf3ne\xf4?\xcd\xb9\xd1\xc4\xf4\xf6\xa0\xbf\xb8\x8f\xf7\xe0>\xf9\xf3?\xf1\xe0_;_\xfd\xac?\x16n\x91\x1a\xd1Y\xee?\xccz\xc7\xcc\x7f\xeb\x81?!(#\x08xB\xf0?B\xdd\xdd\xbcP\x16\xbe\xbfxP2?\xdb\xff\xf2?\xa8E\x88\r\xa8\xc7\xbd\xbf~\xadC5|\x9e\xf8?\xc2(\x1f\xbe\xc3\xc76\xbf\x91G\x98\xc78j\xf0?\xf1\xb3\xa6\xb5\xf9\xe7z\xbfn\x1e\xcb\xb1+p\xe9?A\x138\xab\xc1\xf3\x8c\xbf\x0f\x00\x18\xbe!4\xf0?\xb7\x8b\x1c\x16#\x8f\xd3\xbf"B\xfb\x1a\xc7\xb3\xf8?7\xb9\x14\x86_&\x11?\xeb\x90q\xd8\xf1\xc8\xef?\xff\x8e\xf2e\xce\xf1\xa2\xbf\xc7\x7f\xc3\xfd\xb3?\xf4?\xba\xe9\xe1\x08\x9e\xda\x89?\xe5\xf3f@G\xcc\xf1?\x89\x0c\x05]\xaeX{\xbf%rH\x9ei\x01\xf1?\xafk>[\x03\xdfv\xbf\x93y\xe4\xe9\xb8\x04\xf2?\x94vN\x13\xae\x02\x80?"\xa0L\x8fE=\xf1?\xc5\xab#z_v#?\xc2\xce`}\x17\x8f\xf0?\x12\x05\x11H\x01\x04\xb6\xbf*\x07/\xe4W\x08\xf2?\x0c{r2\xf8\xe3\xa0?\xb5\xf2\x90\x93\xef\xdb\xed?\xc8\xf4,\xce\x0e\x00{\xbf^\'n\x8b9\xf3\xf0?H\x84s\x83\xaa\xbd\xad\xbfT\xae\xf7\x1f\xdd\xcd\xf2?\x9a\xe6\xec\x9a\xf6e\xb9\xbf\x88\xfc`\xa3\n\x0b\xf3?\xa75\xd2\x91\xf9T\xc8\xbf<ul\x9f\x85\x97\xf2?o\xb5\xcb\xa2\x03\xd0\xcd\xbfY\xb4s&\x8c\x15\xfa?'
p39
tp40
bag2
(g3
(I0
tp41
g5
tp42
Rp43
(I1
(I2
I249
tp44
g12
I01
S'\xf3\xd9%\x865)\x96\xbf\xdb\xb6p\x18\xca\xcd\xf1?o\xbb\xa6j<\xbe\xb6?\xa4Yad!\t\xee?\x8e\xf5\xdc\x94\xe4\xb2\xa7\xbf\xc9u\xce\xbeeB\xf0?\x81\x94\xba\xcb\xa3\x9a\xb4\xbf6\x13*U\xe53\xf1?\xb5=\xefM\x8f\xaa\x7f\xbfO\xb6b5hL\xf0?\xb7\x02\xb2#\x12\xb4\x95?[\x95\x0e\x95\x13\x7f\xf0?T\xff\x11\xaf`J\xb9?\x03=\xe9\x98\xd2|\xe6?Xk?\xeb\x03\x19\xde?\xf0(\x07\x04J\x03\xe1?\xe7Q~h o\x80\xbf\xabd\xd8t\xbbf\xf0?\xa65q\x11\xa2p\x9e\xbfD\x81:\x97\x17\xe5\xf1?"\xcd3\x16*\xf2\xa0\xbf\xc8\xed\xbd\xfa3\x05\xf1?\xc0\x86w\x1f\xd6 \x9a?\xa5\x80\xd7\x8e\xda\xfe\xea?!\xbd\xb0J\xf86\xc3\xbfr\xb0\x86\xa7\xa3(\xf5?TH\x8bO\xdf\xe4\xb6\xbf\xcf\x04\x00\xa5<\x8e\xf1?\x8e\xe2\xd3\xa2\xb5\xd1p?@0\xbf]g%\xf0?\xe1"\x00\xc2&\x93\x92\xbf\x18\x05\xb0\x05\xfb\x0f\xf0?\x10\x9d\xb2\x80R\xa8Z?:o77\xa9]\xed?a\xd9\xb5\xce\x94\xeb\x87\xbf\x0b-I\xa3e\xce\xf1?\xc8\xf4\x8a\xaa\x9b$\xbf\xbfH\xae\x9e\xcf\xf2\xf7\xfe?\x9e\'H\xd3\xb1\n\xc4\xbf\xd2\r\x85\x87\x8d%\xf4?H#\xb9%3\xe3\x97?I\xd4\xff\xf3\xf3\xb7\xef?\x1f\xe9\xce\xdb^\x9b\xd3\xbf\x19s\xf0\xb6KF\xfa?\x7f\xf3\xfb\xfb\xc0!\x9f\xbfg\x83>v>\x80\xee?\x91\x14\x13\x90t\xf4\xa3\xbf\xc1\xed;\x04\x9c\xbd\xf1?\xfa \x078{\xe5_\xbf\xedE\xd1U\xf7\xe7\xee?\x10\xfaZ\x84\xf5\xa4\xaf\xbf_\xd2\xb7b\x81L\xed?Q \x94g\xfb\xff\xba\xbf\xdfo\xe6\xb0\x99*\xf2?+\xb0\xe6Tqr\xc1\xbf;\xa9\xb0\xee\x05\xa9\xf7?f\xc7\x1a\x8d\xb6\xbd\xa5?\xb8\xe4p\xf7\x10n\xef?\xa9\xc35}S\xa1i?\xdb\xe8M\xcb\xaa\xfd\xed?I\xe8\x9dl*\xb3\x81?\xee\xb6/F\xa4l\xf1?\x113\xb3r]\xd4\xad\xbf\xf2\xcc[L04\xf1?\xbe\xca\xf8?\xca\xf4\xd0\xbf\xd5\x9cn\x18g}\xf1?\xedg\xd7\x0e~\xd2\x88\xbf\xcd\xc5\xe9\xcc4_\xf0?P\x01\x89G\xc8DX?LE\xbb\x8aT\'\xef?>\x8a\x9b\xf9\xadi\x93?\xadeYq\xada\xf0?m\x81Z"o\xf9~\xbf\\g\x05\x0bHZ\xf0?\x02\xff\xe3-\x1b\x1a\x8a?g-\x03\x7faT\xf0?\xa3zD\x81\xdd\xef\x8f\xbf\xfb\xcb\xdf\xe6]\xe2\xf0?\xa9o\xbfs\xc5\xaa\x98\xbf\xc0jI\x98\t\xd0\xf0?\xf0\xdf\xd2\xec\xc6\xd1\xb9\xbf\x8aA\x1fE*s\xef?\xd57@\x9eD\xbc|\xbfx^\x11#\xa6T\xee?&_5\'J_\x93\xbf\x1f\xa7\xc3P\xcc\xfb\xf0?\xad?VA\xf6M\x81?\xd6Z\x96syi\xf1?\xfb\x88\xf4 p\xa7\xbc\xbf\xf8\xbbv\xd5M\x17\xf2?=\xef\xa7dF5\x94\xbfBj\x96B\x9f/\xf3?C\t|\x11\xd1\xa6\xb9?\xeb1\r\xaf\xcfv\xea?^?E\xea\xa0\xd4\xa5\xbf\xab\xfa8\xbcoE\xf0?C\xaf\xae\x1ah\x16\xb8?\xd5\xce\xa2\xe3\xc4\x1b\xed?z\xc9\xf5\x82\xe0j\x98\xbfM\xb7xc\x1c\xaf\xf1?>\x0b\xf9\x94\x1f\xee\xa5\xbf\xf0w\x99\xd8\xa25\xf0?4\x93\x1d1\xa6\xc6\xc2\xbf_\xee\xdbz\x85|\xf6?$5P\x9fA\x85\xc3?\xe2\xa01R\xe9a\xe7?B\xc6\x95N6E\xc1\xbfV\xf0\x11\xec\x8c\xef\xf1?\x8b\x10\x05\xf7k\x84\x9a?\xf1\x83\xfc\xe2=\x1f\xef?]u\xc8\x87g\x85\xbd\xbfr\x81V\x98ob\xfd?6D\nw\xf2\x96\xb3\xbf(I4>\xba \xf2?\xa7Cd\xff\xa6\xf3\xb1\xbf&TM\xbd\xcd\x1e\xf2?\x13\x7f\xacpy H\xbf+\xa3\x8f&Vu\xf0?N*\xa8\xf2\xa2\xde\xa3\xbf\xc1\xa4\n\x88"\xb1\xf0?\x95\xd6\xad\x97\xd9\xfb\xc5\xbf\xc4f/\x1b\x90`\xf4?\xf4g\x0eQS\xd3\xad\xbf\xa4j8\xa5\xf5\xd8\xed?\x1bU\xeco"#\xb5\xbf\x95)mT,\xf3\xf6?.\xf5\xd7\xc2\xe1J\xb2\xbf&~,\x1d\xfe\x0c\xf1?\xa8\xd3\x19\xd8\n\x1a\xa6?\x01.\x8f\x826t\xec?\xba\x89K\xd9\xdf\xdd\xd3\xbf[rDt$\x02\xfb?e\xfd\n2\x95(\xa0\xbf\xc6\t\xcf}\xd0\x01\xe8?\xc6\x9e\xb5\xea\xa1X\xce\xbf\xc1\xb7a #\xd5\xf4?\xb7\xe6\xba\xa0;\x18\xc3\xbf\x96\xc2w\x04\x12\x8f\xf3?|6\xb7\x1e\xed\xc3\xc1\xbf\xa6\xe5\xf2\x91\x98;\xf2?P\xbd`\xe3\xdc\xa5\xe7?\x88\x9f\x0bAro\xa5\xbf\xb7\x1f\xc6\xdb\xcc\xcb\x86?\x03l\xa3\xb5\xe7\xdb\xec?\x06\xc6\x7f\xb7\xa4\xfe\xb4\xbf\x01\xd6A\xa3\xf5\x97\xf3?C\nezJ\xe8y\xbfQ\x94z\x9d"\xe5\xf0?\r\x12\x97@\x83\xb8\xd7\xbf$\x87\xf8Z!k\xfc?oU\xd6\x80\xa2\x11\xb4\xbf\x83&\xb8x\xe0\xa9\xf1?q\xa2\xfd\x9e+\xc6\xa7?\xe1C\xf7D\xd8)\xef?2;\xec\xf8|\xe3\x88?\x87\xaeT\x0f\xeb\xec\xee?3\x87\xa0\x8a\x81\xfa\xb4\xbf\x1c\x15\xf3.\xd3\xd4\xf2?\xa7{\xcen_\x07\xc2\xbfR\x0f\xc6\x83xW\xf0?\x08\xd9;\xa8\xa1\xbd\x90?\xb1\x96\xd2\xedZ\x07\xf0?\xb6\xc6,\tW?\x83\xbf\xe69Z\x9a\x97!\xf2?,\xcc\xea\xba\x1fC\x1a@\x0e:\x91\xd3\x9a\xce\x05\xc09\xd0\xe0\x822zr\xbf +qU3%\xf0?\xcd.h\x93p\xaa\x8f?a\x17P\xdf\xe4\xb8\xee?\x93\xea\xd4\x0c\xf2\xfe~?bsQ\xaafd\xef?W7\xfe]\x93\x06\xbf?\x06\xf1F\xbd\xc5\x02\xe8?\xcf\xe7\xda\xed\x98X\xa2?\x0ev\r\x97\xce6\xef?\xe8\xd4\xc0ta\xdc\x91?\xd5\x8b\xe3\xef\x91\xc0\xef?\x90\xde5;\x85|\xc8\xbf\xaf\xe2w.\xc2\xbf\xf1?\x99\xa22\x95\xe6\xaf\xbe\xbf\xb1\xb6x\x93\xb7\xd5\xf1?}\xd5k\x14]t\xb3\xbf\xdc\xe43\x97\xdao\xf0?\xc7\xba,O\xb3\xa4\x96?/\xf8X[kn\xf1?S\x15\xcc\xac`n\xd6\xbfi\\d\x05\x04\x7f\xfd?\xe8\xf9+\x96\xe3n\x8b?2\x9b\xf6&\xa8O\xec?\xef\xb4!\x11\xf31\xa2?\xaap\x87\xdc\x9d<\xee?\x1a\x8d\\SH\xf7\xb8\xbf\xc7\xd3\x82\xaa\x9b\x10\xf5?\x0cF/\xa6\xfeC\xc6\xbf\xd0\x1beAN\x00\xf3?\x87\x18\xe90\xb5\x90\xa9?\xcf\xae+\xb3\xf9\xe1\xf0?\xe2\x18G\xc5\x13\xe4\xbd\xbf\x7f\x85\xb8\x06^R\xed?R\x9f\xd79\xdb\xc4~\xbf\x94\xf2\x0e\xa2U\xde\xf1?N\xafk^e\xb0\xca\xbf\xab+h$\x8a\xcd\xf1?\xb6.\x1bk6\xe7\x88\xbfQs\xd9#\x9b\xb0\xf0?\xfd\xeb)d\xc1V\x82?\x9b]j1+\x10\xed?\xe3{`\xab[\xed\xae\xbf\xf8\xd8.e\x1b\x8e\xf5?%\xdd\xbd\xef3\xcc\xc7\xbfk\xf9\x9b\xc3j\xbc\xf3?\xf5\xab\x18\x93\x9e\r\xa0?\x98\xb9\x01\x95\xef{\xed?\xe4\xea\x17\xecK\xfe\x82?\x00\xf5a\x86\xd0%\xf0?B\x82\x81T\xb5\x84\xa5?\x05K\xe5\x91\xdcc\xe8?\x19\x01\xddHZS\xc1\xbf\x03W9\xe2jq\xf4?`\xd83K\t3\xc2\xbf\xe9\xd9\x98\x013p\xf2?<\x88\tUX\xbe\xc9\xbf\xf65\x83\xad\xdaB\xf4?\x0b\xcc\x91\x16K\\\x92\xbf\x0c\x96BW\xd7P\xef?\xef\xdb_VF\x87\x9c?\xfe:\xd0\x16\xc5\x05\xee?\x8bv\xb7>\xa3\xea\xcb\xbfa"\xe9;\x13~\xf2?\xadY\xc3\xaf\xda\xcf\xa3\xbf\x8f\x13\xda+;\xb2\xf2?\xa5r{q\xcf\xfe\xb7\xbfC\x073\x03\x91\xa8\xf0?\x03\x9axY\xb0.p?\x05\x04\xec/\x97\xf7\xf0?\xc71\x1bM\xb5=\xa0?4\xc0r\x81\xa8\xf3\xed?\x82\xe6p\xac\xa1\x08\x98?\xfa#\x14<\x99C\xf0?i\x1b\xadg\x8d]\xa4?!\xa8\xbdT\xea\x96\xf1?\xca\x87_\xf3H\xbc\xaa\xbf\x8c\xa8\x1a\x84\xb3s\xf0? \x1f\xfb.2C\xb5?\xa96\x8b\xb5J\x92\xed?%L*<fM\xc2\xbfn\xf4\x1e~ow\xf1?\xc7\x89Xf\xf0\xa8\xbb\xbf\xc8\xfeU\xd2O\xe1\xf1?\xbfq\xca6\xab\xa9H?\x8a\xbc\x8b\xf0\xc2\x7f\xef?\x13\xa7\xe9\xd6\x05\x90\xc7\xbf\x93v\x02\'|\xa2\xf7?\xcd\xc2U\xbc\xf61\xbb\xbf\x85\x05\xbb\xefN\x16\xee?\x1f\xdb\xd7\xcb\xa3\xee\xb1\xbf\xcf\x17\x13\xb2\xbc\x03\xf3?\x92\xd5ZC\x1f\xfd\xc3\xbfq\xebG\xff:\xb1\xf2?%\xd0Q\xb3\x9fu\xa7?\xf0-\'\x0f\x82\xdc\xf2?\xd9n\x1b\xe8a\xac\xa0\xbf\x80h/3\xb4a\xe8?\xc5\x90\x92GS\xef}?qmnDA\xae\xed?-mJH\x05:\x92?\x05\xfd\x95\x94\xd8G\xef?P\xd9\x9d\x0c\xc0\xb8\x9c?5Z\x10\x02\x84\xdc\xed?E5I\xe4\xf9\x11\x93\xbfjo(Akb\xf1?\x15\xe5\xfe\xd2\x98_\x8f?)\xb6\xfaY)k\xf0?\xcf\x10\x8c\xa1G\x86b?\x9cB\xf3\xed60\xf0?\x1d\xce\x93\xeeI\x87p?\xdf\xf3\xe0\xf2.\xd7\xef?\x8cT\x8c\x14\xd3\x98e?\xc7r{+Y\x08\xef?\xad9\x87.\xca7\xac?[Q~\x8e\x80\x15\xee?h\xbf\xb9e\xdf0\x8b?\xcf\xefNiD\x0e\xee?\x15\xec\xed\x98&W\x80\xbf\xba;\xa7\xd6>6\xef?\xe2*E\xa8F \xac?\x95\xfcs\x1en\xe7\xed?j>C\xf6i\xe8\xcc\xbf\x8b\xb2\xa1\xa2\xa5\x0b\xf7?\x7f\xc7\xed\xfb\x078\xc2\xbf\xbc\xca\xd6q.\xe3\xef?\xc7.\xde\xdc\x11@\xbe\xbf!y[c\x86^\xef?\x91\xf3\xdc \xeb8\xc1\xbf\xe3\xab\x8f]\x13\x0c\xf6?]\xe5eu#\x10\x9d\xbf\xd5\xfd5\x9a\xcc\xed\xef?k5\xb7\x87\x92\xa8\x80?\x1e\xb5F|\xbbT\xf1?\xdcO\xf9\x91Yz\xc7\xbf,\xeb\xe0\x92\xb4u\xf1?\xdan\x9d\xe9\x85\xcc\x95\xbfhE\xa1\xc9\xda.\xf1?U\'\xe3SK{\x9f?]F/\xa58\x0b\xee?\xf5-t\x14\xb8\xe7\xb1\xbf\xc2\xac\xb5\xcd\xd0\xac\xea?\x05_\x18\x11\x02\xa5\xc3\xbf\x0c\'\xaa\xe3?\xb7\xf1?/|\xa8\x8b\xf9\xc9\xc2\xbfM\x89Ih\xdb\x9a\xf5?\xde\xf0[yh\xc2\xb6\xbf\x91O\x9d\n*\xe2\xf2?\xbbt\x9aqB?\x95\xbf\'\xc8\rcb\xa8\xf0?\xe4t+\xff.t\xb0?\xdd\xca\xbex\xf0\xa7\xeb?\xc7fk\x9f\x95\x8e\x92\xbf\x17S\x834/\xed\xee?l\x11\x08Z\x1e\xb3\xa7\xbf$S\xe8\x83@\x8c\xf1?^O\xd4\xa7\x0cZ\x94?\xb4\x04\x86^4\xb6\xef?\xdb\xe8\xba\x93j\xb1\xeb?|\x1f\x0b\xaf\x82(\xe0?\xfc\x85\xa2\xe2\x8d\xe7\x89?8\x18\xc8\xbeY7\xec?\xb84\xc5\x0eP\xe3\xd1?\xa4\xbcZ\x1d/g\xe6?\x11\xe1o\x19p,\xba?e\x1c@\xa4\xaa#\xe7?c\xd6\x884\x9e\x8e\x98?sC\xab\xd5M0\xed?\x12K\x91\x89\xa8j\x8c\xbfJ\xfc\xc8d\x97\x18\xed?\x1e+A\x10\xcc\x00\x8a?\xad\xbfhdh0\xf0?_\xee\x91)h!\xba\xbf\x94\xf6h4@\xa4\xf2?\xebm\xd2\x874k\xc2\xbf\x7f\x91\x97\x92\xa7O\xf1?\xc3\xc3\x0f\x83;\xd0{?;\xde\xd7\xc7z\x93\xf0?x\xd7\x0b\r\x8c0\xd8\xbf<6n\xec\x9c\xad\xfe?\\\x98\xbe\xe4\xaak\xb1\xbf^?\xcfN$q\xf3?)\x04X\x99\xfbv\x82\xbf\x95\x04vS\xbeh\xf0?PmJr[s\xbd\xbf\x11\xc6\xde\x96\xc8\xa8\xf4?Y\xd59C\xc3\x1c\x8d\xbf\x8c_"i"*\xf0?\xfc2A\xf8\x89\x10\xa2\xbfk\x12\xb5JE\x90\xf0?L\xdd\xf8\x1b\x8fE\xcc\xbf2o\x0bw\x05\xa4\xf6?\x80\xd8l6H\xcbq?`B\x0b\xe0y\x0e\xed?Kv\x98\xfb\x97s\xa1\xbfW\xa4\xac\xf7\xees\xf2?jK\x05o\t\x04\xa3\xbfnW\xec*k\xa8\xf1?\xe6pM\xf5M\xa9\xb3\xbfI\x0c\xd4Qs\xbd\xee??\xc2\xc6\xc35D\x9d?$\x82\x9d\xbf\xcf3\xee?|\x91*\x1a\xe1\xb1\x8a?\x11!0r\xdcz\xee?\x98j\x03\x08b\x9e\xc9\xbf\xe6\x83k\x984v\xf5?I\xea\x1b\xe5\x80`\x9e?Ek%+*\x1e\xf0?5H\xda}\xc9\xb7\xeb?\xe3\x14)\xc5>\xe9\xe5?\xd0\xbe\xd2y\x0c\xaa\x8c?) \xef\xe7\xf35\xef?f\x9f\xb2\xb2\x1c\xc6\x8d?\xc8\xd3[\x9br\xfb\xf0?C\xe1WE \xfb\x85?W\xd2z\xd5\xa8\xc2\xec?\x8c\x86@\xdd\xc7g\x97\xbf\xfez\xd2\x0cxx\xf1?\x01\xd7/\x84\xcaW\xa0\xbf#P\xec%\x96v\xf1?n\xb3\xd1\x02 ;\xc2\xbft\xa5\xfd\xf0\x19z\xf2?\x1eX\x966\x13\x92\x7f\xbf\x9c\xcfT\xc3\xccW\xf2?&\xeb\xbf\xfe\xce5\xc5\xbf\xdbbM6\x89\xe8\xf1?\xd0g\xd3\xce\xf4\xe9\xba?;\x0cYe\xb7\xdf\xe8?\xed\xbd\x849\x83L\xb0\xbf\xfc\x01\xef\x98\xc7U\xef?jB\xe6\x1f\x82\xa4\x9e?\x8byMTd\xed\xf0?\x11\x7fnBf\x04\x99\xbfX\xa3a\xcb\x85\xff\xee?\x01:\x02\xa4\x86F\xb9\xbfQ\xf6\xe0Ab(\xf2?\x85|\x03\x0f-\xbfo\xbf\r\xaat\xcf\xe9\xd0\xf8?T\x82\xbd\xa7\x12u\x99\xbfk\x02X\x94\x08R\xef?\xe8\x91z\x01Z\xbee?\x01\xb8\x00Z\xc1h\xf2?3-0z\xf8F\xa1\xbf\xbf\xfdGb\x1f\xb0\xf2?\xa2\x00v\xfcV4\xc0\xbf\xd4\x9d\t\xe9\xbc\xa8\xf2?\x1e\x05\xc9Vy\xbe\x96?=\xc5\xe5\x90\x8f1\xf2?@O\x9b\xfeT\xc5\x04\xbf\xbd\xa2S]4\xdf\xe8?z(\xee\xba\xc3\xb5\xa6\xbf\x9d[XJ8\xf5\xf5?\xc6\xc6\t\xb7\xa8\'f?\x81uH\xfbo%\xee?\xe3_\x8b\xed\x8e\xff\x80?N\x10)u6Y\xef?\xd7[]\xb2\x08\xc3\xc3?A\xf1Z\xb3K\xea\xf1?\x19n\xad\xadjG\xc6\xbfj\x05N\x8dQ\xc0\xf2?\x17\xe8\xf1i\xa7\xd3\xb5\xbf-\x92\xc2\x7f\x1c&\xf0?ac\xbdnXp\xa0\xbfT\x01\xd0\x03\x0e\x97\xf0?:X\x1d\x0e\x1d\xe8f?\xdb}\xf5\xac\xb6\xc3\xef?\xb9\xd0\xc4 D*\x83\xbf L\xa6\x94Q\xca\xf0?\xce\x0f\x82\xb7Ot\xa5\xbf\xc1\x9e\x19\t\x83`\xf1?\xa9\x9a\x12\x8d\x19!\xb5\xbf\x05\x99U=\xf2(\xf5?\xa0\xb4\x13\x11v\x1f\xaf\xbf\xce\xbf\xcb7L\x9b\xf1?2\xf0=\x05\xba\x1d\xac?=\x94\x1d\xd9\x02:\xf5?\r\xea\x00G\x8a\xb9\x8d\xbf\x0c\n.+NR\xf0?\xf4\xd7\x95N_\xc5\x98?\x91\xc5\xffl\x9dc\xef?PM?w\xf7\r\xa8\xbf\xf2\xe2\xa9\xda\xd0V\xf1?\xe7\xf6M\x0b,\xce\xa9\xbfi,\xeb\xd4N\xf5\xf2?\xa4\x9d\xa8G=(\x82\xbf\x80\xb3\x08\xd8\x00P\xf2?\xb5~-\xd5\x89\x83\xc3\xbf\x12\xa0\xd6\xd5\xfdF\xf2?\xa4xJ\xf6:\xd1\xcf\xbf\x90qZ\xe6\xbe\xed\xf6?\x9c\xe7\xf3>\xbb\xe8\xa4\xbf\xc7(\xb4\x0f/\xf9\xf2?a\xa3\xadQ\x15\xbb\x98\xbfhp\xa7q\x81\xbc\xf1?\x1b\xa8.-n\xb8g?\xbe&\x11\xaa\xce\x81\xf1?\xd2\x1d\xd2\x83\x18\x96\x83\xbfC\x14\x1fU=X\xf2?\x99Y\xae\xee$\r\xc1\xbf\t\xa6\x167e_\xf0?\xe3\xbez\x14\'\xd2\x8c?p8\x0f\xdaBR\xef?|s &\xc8:\x9a\xbf\xf0\x18\xeb\xe5_\x12\xee?\xdeF\x80\xfbZR\x9e?\xd5\n\x1a\xb4\xbaA\xee?\x89\x96\x1dS\xf7\xb1`\xbfm\xf11\x18A\xe7\xf0?\xe4\'\x80\\o\xb2\xa6?\x17\x14\xe3\xec"\x19\xed?{.\xea\xcd7\xd7\xc8?\xf0o:\xaa\xeeW\xda?\x93\xb7&]\x96\xa3\xc9\xbfx\xd8 \xc0l\xa4\xff?C\xb8\x8c\xa0\xa8\x96\xb9\xbf\x88h\xeb$\xb2Q\xea?p\xder\xbb\xed\xb9\xb6?\xfe\xc2!\xcc\xfe\xff\xec?:\xbf\xea\xe9\xa9\x0f\xa2\xbf\xe8\x88\xc2+\xe2\x07\xef?R\xbb6x\xedF\x81?0\x88*\xf4\x89\xa4\xf0?l\xc2P\x0e\xd4h\xa1?!z\x1e\xec\xe6\xfc\xef?.!Eu\x1e\\\x9c?k\xb8\xf8\x11(\x80\xeb?\x9eXw\x94\xa0\xd8\x93?8{b\x08(\xa6\xec?\xc0\xc1\xc9J"\x19\xca\xbf$_\xad\x1ez\xf0\xf4?\xec\x8fYb\x10\x9a\x93\xbf\xd6\xec\xa1z\x02\x8d\xf1?'
p45
tp46
bag2
(g3
(I0
tp47
g5
tp48
Rp49
(I1
(I2
I237
tp50
g12
I01
S'\xd3\x1c\xb6\'V\x14\xae\xbf\x15\x9a\xb6\x867\xfe\xf5?\xec\x80\x0e\xe2!P\xd2?Acn\xe9\xc8\xef\xff?\xe6\tl\xa5\x80u\xc3\xbf\xaagOr\x1d\xd0\xf6?m\xf9\xf3\xf6.}r?\xdb\xd3&\xa9%M\xec?\x0e-Q\xe2\xb0\xce\xcf?i\xae\x8c\xf2\x13\xae\xdf?\xb1F\xea\xb9_"\xce\xbf\xd7\x02\xe4\xea\x0cz\xf3?\xc3\x9d]{#j\x99?\xdf\x02\x1e\xe5\xdfV\xec?\xe51d\xe35\xfbV?xb\xdd\x17\xd1\xda\xed?w\x01\xeb%\xe3+\x93?\xe4\x87\xcc\x82`W\xed?\xb1\xc3\rR^\x1eY?`\x00\x87"t\x8a\xed?W!,\xc8\xc0\xe7\xb9?\xc0<K\x9c/\x97\xe5?\x0eB.\xdePk\xc6?\xed\xf5\x8eU\xe3\x02\xe1?\x9e\xa4\xa9\x86\xb0<\xb1?\xaaV\xfci\x07C\xef?\xfeTz\xcb\x00\xca\x99?I\xe0\x0eM\x04.\xed?\x07\xbc\xa2W?"\xb1?\xef\xd1\xac\xde\x9c\xae\xe3?]\x8c\x97n\xa1\x14\x9c\xbf\xc6\x15:C:\xc8\xe9?]\xcc\x07\x1bK\xd5\x7f\xbfQ4\xa7,T)\xef?\x80\x93\xc4`\x12\xe5\x96?"\x89\xde\xaf\xba,\xf0?F\x19\xc4fY\xa6\x93?\x0c\xbe\xb427\xea\xef?\xf4)B\x114\x83\xb5?\xb2\xb7\x81\x84\x91U\xed?\xcb\x889=\x1e\xc6\xae\xbf.\xf4\x82\xebk-\xf3?;\xc6`\x1e\xe0\xee\xa8?\x89:\xd3 )\xf2\xf2?J\xe7\xdbq+W\xa1\xbfz\x90\x0b\x88-\r\xf0?\xfc\xe6P\xbb3<\xc6\xbf\xe8\xcb@\x10\xe7A\xf8?WF!x\xc0\xb2\xa8?\xc5\x03\xc4E\xe8c\xef?\xb5[\xf4I\x9c\xf2\x91?\x93c\x0e#\x00\'\xee?\xf2\xf4\xfa\xa2\xb9I\x8b?9\x19^\xf6\x8a\xca\xf3?l\xde\xb6\xb2\xa0\xd4\xaa\xbf\xfb\xff(\xd0`\x03\xf7?\xa2\x15\xc6tH\xa8\x9d?L\xc2g\x0ff\x10\xf1?F\xec-\xf5\x12\xba\xc4\xbfFR\x98\x9a\xdcQ\xf3?4\xd3\xdc \xabmq?\x0c\xec\xe2t\xad\xa3\xe6?\xf3[6\xad%\xdf\xb8\xbf\xf1e\x9b^\xb1\xac\xed?\xb9w\xd6\x91\x95\x94\xae\xbf:Q!^\x97u\xec?\xabD\x04\xed\xad\x86\xa4?i\xeb\x97\xf0W\xd6\xec?f\x93\xe1/\x8f\xf4\xa0?\xc5\x06f\x88(\x9a\xf1?H\xf9\xde\xf9\xe1\xbe\xbf\xbf\xa0\\\xb6A\x12\xfc\xf7?.>\t\xec\x87\xa7\xc9\xbfR\x18E\xbb\xa3Q\xf6?\xe2]\xbd!\xb8\xe1\xcd?\x1b\xfd\xd0\xbf\x887\xe2?\x18w%\xe2h@\xa8\xbf\x1d\xbdW\xcfk\xa0\xf2?\x07OG\xf1\xeb\x00\xb1\xbfU\x82\xf1\x99\xa0\x19\xf4?\x8ak\xfa\xb8\n\xef\x9a\xbf\x8c\xffO\xfb\xd4T\xed?\xe9\x13\xe4\x87\xabi\xc1\xbf]\x02w(\x11\xd3\xf5?%8\xcaE\xd2\xe3\xac\xbf\n,\xb5>\x88C\xf5?\xf4\r%\x19\x04\xe2\xc6\xbf,\x14\x11\x9b\xa2\xf8\xf2?\xdbo\x93f\x85=}\xbf\xe8>\xa4.\xf6\x07\xf0?\xdb\xc4\x0e\x9e\xc6W\xb7\xbf\x1b\x1dW\x97\'e\xf2?\x90ViN\x10\xbf\x87\xbf\xd6\xde|\xa6\x0c\xb7\xef?\xe6\xb1\xb9\x0e\xab\xf7\xab\xbf \'ec\xc2\xd5\xf2?\x88\x12\x0f\xf3\xaf\xa8\xc3\xbf0e\xbe\xd6X\x9f\xf4?A\xe4T\xf7\xe0\x0f\xa4\xbf\xec\x1d\x90\xb0Q\xe4\xf6?\x9a\xe78}\x0bT\x98\xbf\x81\xcf|\xbbm\x1e\xf0?\x1e\x80\x96\xdaF2\x87\xbfu\x08Bd\x87A\xf1?A\xed\'\xda?<\x8f?\xe0\x1b\x97\xf0\x1c\\\xed?>\x12\x1a\xd7\xf3\xaf\x83\xbf\xbb\x8e\xdc\x91\xc0\x19\xec?\xdd\xf16\xffr\x80p\xbfW\xcb\x0b\x14\x8f\x95\xfc?\xc8k\xb4\x86\xfd\x8b\x8e?\\d\xff\x02P\xfe\xe9?\x8fDT\xf8{\x86\xdc?\xac\x9ag\xda\x08(\xd1?\xb5\xbc\x96\x1a\xc7\xa5\x91?\xeb\xe4\xee\xe9\x87\x93\xf1?\xcd\xef\xcd\x872i\x95?\x98\ty\x89g\xf3\xef?\xf1\x08\xdb\xa5\xebr\xc8?*w\x97x<\xf2\xe5?\xea\x1c2\xacs\x18\xa3\xbf\xa8\xd4\x83\xeb7t\xf1?\xd5\x00\x7f\xc6\x10\x13U\xbf2a\'\xf29\xed\xea?\xfb\xa5\xcby\\\xfb\xac?\x137Z1y(\xe6?\t\x89uo.:\x90?\xee\x99\x1dg\xbc\x01\xf0?U-\xc0\xd9-\xca\x93?\xca|3\xc5\xbd{\xf0?\x0e?\x98\xe5s\xdb\xac?t(\xf9l\xe6\x8e\xed?\xe8p\xe6\xa6\x89.\xc5\xbf\xc1\xd6\xb66\x90\xbf\xf3?\xb9\x13\xae0\xbd\xbd\xa2\xbf\x9d\x1a\xd8\xc2>C\xf4?\x81\x82,H@\xd7\xab\xbfCe\xb1\xe3\xc2\xd2\xf0?R\xd3\xf6\x84\xa7\x931\xbf\xacy\x98\xac\xc5~\xed?\xaf\xfdj\x02\xf2\x80s?=\xa6\xe2\xdc_\x9f\xf0?\xd1mh\xc9f.\xad?-\xfc\x15\xf0q4\xf0?5\xd8\x19 \x11+\xbf\xbfmu\xc5\x9d\xf4\xa1\xf1?l\xfa\xaa\xd4i\xc9\x99?\xb3j\xb1\x16\xa3\x05\xee?*\xa2\xe2yNP\xa2?\xf6G\x08\x87\x0b\x8d\xf0?\xa2PxA\x1b;\x93?{\xb5u\xf8\xa5\xb9\xf0?\xaa\x12k\xef0q\xc2\xbfn\x8d\xbd\xbc\xabl\xf3?\x19\x08gs\xc4\xbf\xc3\xbf\xa4\xa4a\xdd\x94g\xf1?o\xe1n\xba\x1a[\xd9?\xb9^1\xc9\xe81\xca?_\xfdc\xf1S\x88\x95\xbf\xb6\xb6\xf0P\xdcv\xee?\x07n\x1f\x19n\xf5\x85?\x9dBf\x8dw\x01\xf1?P.<\xa8\x82\xa8\xac\xbfu\x0e6\x7f{:\xed?\xdf\x99%\x7f\x80\xf2\xb8\xbf\xad\x84"\xb3\xfe\x08\xf2?\x0bw\xd2X\xe6\x12}?\x0fq;1(\xda\xef?\x88\xf5\xfd\xd7\xce\xcav?kk\xff\xf2\xcdw\xf1?\xae\x80\x91\xf0=\x98\xc1\xbf\x881|\xac6\x8c\xf1?\x8f%\xa2\xdfK\x83\xa4?\x92pr(\xc4,\xe9?yCN`<\x8a8?\x82\x11\xcd2\x00V\xef?\xc28{\rc\xf3\x83?\x88\xbcY\x18%\x83\xf0?^\\\xab-\x1d\xb5\x9f\xbf\x8bM\xac\x85Z[\xf2?5\x9a\xc8`N\xf7\xa0\xbf\x88\xf3Y6\xf7\x08\xf1?\xb3\xff\xe2Q\xa5\x1d\xbb?\xd3G\xf7\xab\xe2T\xe9?$\xea\xab\x15\x13E\xd0\xbf\x00\xd3#B\xa0s\xfe?Y\xb3 \xea[\xc6\xc2\xbf\x15\xa5\x8f\x8f\xe8\x03\xf6? O\xff\x98\nve?\xaa\xa1\xbd\xce\xfe#\xf2?\xa4\xd2.\x0b\x02)\xc0?\xad_\x0fC\x83\xbc\xea?\x95H\xf0\xc67\xdbT\xbf@\xa3\x11\xc5\x9d\x11\xe4?\x9b\xf3:\xfc?\xfbv?\x9e\x9f\x91\xb1\x1dj\xef?\xfb\xa22\xc3\x07,W\xbf>\xe3\x0b\n\xb2\x88\xf2?g0\xe3\x18\x0c\xd4\x9b\xbf\xd7\x82\x16\xcc\xb1&\xfc?#w\x8b/F\xa7\x80?\xc3\x80\xf5a>\x98\xed?\xf0\x8cQ\xe1\xbeE\xa8\xbf\xc4\x1a\xec\x1f\xe6~\xf2?\xb0+\\\x8a\xdcz\x7f\xbfZ"\xb3\xc6\xd1\xac\xef?\xae\x85q-\xb9\xfe\x8d\xbf{D\xa3\x1d\xdfW\xf0?1\xab"\x01S\xfa\xb2?y\xcc\xe2\xf5\x13|\xeb?\x01\xc8(/V\xd1\xa3\xbfU\x1a\xacf\xa5\x8e\xeb?\x0e\xfe\xad4%&\xc2\xbf]\x17\x19\x9d\x9d\xad\xf5?m\xc9EU\xa1\xb0\xa3?\xa1\xb9\x99\x104h\xed?\x8f\xf86Ohb\xb3\xbf\xfc\xc28b\x19;\xf0?)\xcb\xfc\xf3\x12{\xc3?\xc8\xd2\xbd\xa1\xd6\xf8\xfc?\xaa\x00\xd8\xf0\r\x88\x9b\xbf\xa4\xcf+\xe4\xdd(\xf1?q\xd82\xef\x82e\x99\xbf\xd6\x12\n\x19j\xd7\xf2?Ap\x8b\x92\xcc\nw\xbf\xda\xdfdiQ\x02\xf3?1\xb4\xb4r\x01\x8f\x86?YR\xffs\xb6f\xed?\xd7\xf8:,\xb3\x9f\x85\xbf\rj\x04\xde\xc5"\xee?nh\xd8j \xde\x8f?3\xfc[\x8d\xcdA\xf0?\xc7c\xe9(8\x1d\x99\xbf\x84&\x98\xf0\x0b\xab\xf0?\x9a\x03\xcf\xe4\x03\x9ez\xbf_\xb3\x042\x9e\xbe\xee?\x8f\xd7\xd3\x0bT\xd3\xca?r2kjP\x08\xf1?\xae\x17=\x03A@\xbc\xbf!KT\xcf\x1d+\xf9?W\x1b\xc7\xad9}\xc0\xbfHT4\xdcnT\xf7?\xa7\x98\xa2R\x1c\xfdb?\x90\x01J\xd1\xe1\xc0\xec?\x97\xe3\xeb\xea:H\xa6?dA(o\xe4\xae\xf0?7\xb4\xc1\xd1\xdaK\x96?\xfe;@\x83&\xbb\xe9?\r\x03W\xe5\xe7%\xd0\xbf\xd1\xeb\xf6"\xdf\x0e\xfa?:fVO\xd7}\xd1\xbft_2i\xd5p\xf9?\xf9Z\t{\x11\xc6}\xbf\xf1\x9a\xde\x19\xe7\x89\xf5?\\\x9a5H\xecR\xde\xbf_\r\xd7G4\xff\x05@f\xf84 `\xb5\xaf\xbft\xea\xb3\xc5f\xd6\xf1?g\xc4\x1fW\xe8|\xb2\xbf\xab\x19X\xc2\xc2h\xf3?/\xebj6S\x91\x97?\xe2\x13.\x99?\xc3\xee?\xb2\x87\xe9\x81\xd8}p?:P\xd1N\xef\xaa\xec?\xfd4p%\xcb\xca\x84\xbfB\x9b!\x97\xd9\xb5\xef?"\xb0\x80\x11\x01&[\xbf\xbd\xd917\xb0\x9f\xeb?lV\xfdMy\xca\xc2\xbfR_<\x02D\x05\xf1?1\xc1.v\xf5\xca\x9d\xbf\x11\xd2J\xfb\x16\x0e\xf1?\x81\x90[\x02\xf9B\xc9\xbf\xab\xbc\xc9\xb3j\xbe\xf3?\xb3s\xa2\x19/\xdb\xde\xbf\x12\x1a\xa0\x14\x8f\x80\x01@\xbf\x0b\xc5\xc4\x18\xd2\xcc\xbf\xa8_S\xc8}\xd5\xf9?K\xe8L\xa6\xa8\xae\xec?n&\xca\xe5\xae>\xc1\xbf\xf3\xe7\x80\x8c\xe5\xae\xa9\xbf>r\x00\xed\xfay\xf4?\xcc\x87\xb2\xb1\xb6\xc3\x81?\xc7\xe2\xfa\xb4~\xaf\xee?\x15&\x9b\xe73,\xc3\xbf\xeb\xde\xf0\xb8\x15\x7f\x03@\xacV^\xaf\xaf\x1eq?\xc6\xd3\xfa\xf7sq\xeb?\x8a\xfd9\xff*Y\xb5\xbf\xe2\xcd\xdbm\xa5\xee\xf3?\x93\xbc\x15\xe3U\n\xe3\xbf\xacT:\xde\xd4\xeb\x02@\xed\xdc\xfd\xe7w\xe3\xa5?\xbd\x95\xddc\xd4\x04\xeb?\x1do+\xcf\xcfC\xaf?;\x94\xf9Q\x07}\xed?\x12\x16\n\x03/\x07\x80\xbfB\xd9/1\x9a\xfe\xf0?O\x10\x00\xa5\x9f\xd7\xd3\xbf\x81t\xf3\x85\x04$\x00@\xca~7\x8e\xd4\x96\xd2?{\x1d\xeb\xb3\x12z\xcb?\xb7\xe4^\x03;\xfd\x80?\xfe\xedpD\xa1\x8d\xf1?\xe0\xc8\x8d:E\xc5s?w\x04\xa9\xee\xd9\x8f\xf0?\x87\x1e\x92$\x91y\xb0?\xb7 \x92 \xaa{\xf0?\x19\xe8b\xb8\xb6\xd2\x8d?\xe5\xcb~n1\xcc\xec?\x00Y|\xd0\xed\x85\xb5?j\xe3\x81:\x8e[\xf3?\xdbD\xb0\x97\x9c\xf8\xc2?\x0e\xbd*\xd2\xe1\x08\xf0?H\x03\xca\x1f\x80C}\xbf\x9cg\x90\xdd\xac\xbc\xf1?x\xe1\x8d\xcf\x17c\xbf\xbf_\x80\xfa\x9a\xbf4\xf1?\x87F\xc6\xc5\xb0\x80\xc5\xbf%b\xae\x15p\x8d\xf3?ksv\xb9\x7fe\xc0\xbf\x8d\xef\x0fk\xe0\xd9\xf7?4\xf2\xc9\xf2\x9f,\x96?\xcb\xa7\x0e\x0f[\x1b\xef?,\xf2\x9dm\xf6)\x82\xbfK\x8f\xe4\'\xb0\r\xef?U\xe8v\xacOw\x80\xbfp\x12\x1e\xf5\x96Q\xf2?}\xf7\x85v\xb9\xbe{\xbf\xdb\xf6q\xc4*\x94\xf4?\xc3\xb9\xb4z\xdf5\x92\xbf\xc4\xc3\x88\xb2\xc0y\xf0?\xfe\xb0\x05\xa9\x84\xc1\xa5\xbfc\xb4\x19\xf1WM\xf1?\xc3\x9a\x1dQ<\x01\xa9\xbflG\x95H\xfe\x19\xf0?\x0b\x84J\xf1\x8d\xa3\xa0\xbf\x06\x8d\x1d\x9b\xae\xdc\xf0?o\xa7\x0c.\xb6\xa5\xc7\xbf \x8e]\xa5\x93\x0c\xf8?\\N\x03\xdfO\xec\x8d\xbf\x88|\xed\x84\xb1\x06\xf0?\xf5!\xef\x8e\xcf\x16\xba\xbfu\x91\xaf\xf4\xa1\x14\xf7?r\x9b\xb2\xb6)l\xb7?\x9f\xdc\x80\xd0\x1e?\xe6?\xc9L\xe0\xf4-\x8f\x87?5h\xbe.0\xd8\xea?\xbf\xd4x\xd8&E\xc1\xbf#\xec\x08z\xcb\xf9\xf4?\xb2\x0cM=\x9bMk?P\xda\xd93\xa7r\xed?\xa1<\xfd\xb5\r\x87\xa9\xbf*>U"C\x06\xf0?\x02X%\xb3\x19\x19\xd5?\x12N\xae\x9c$\r\xd0?\xb3!\r\xe8c\xb3y?s\xbb\xfe\x0fX\xc5\xe6?\xa1\x84\x100avM?\x88GA\xf3\t\xbc\xf1?\x87\xc2\xd1F\x95\xf1\xd1\xbf\xc9\xd8%\xed\x88.\xf8?\x9f]\xffwL$\xc5\xbf\xdei\xd4}j\xd3\xf4?\xbc\xa0\xb1B\x888\xa3?\x1fi\x06;\xd9\xe2\xe8?%\x96\x93\x08":\xe0?\x1f\xdd\x98\rI\x9b\x99?v\x8f\xa7\x80\xac\xb1x?\xf1\xf6\x0f(4\xc4\xee?\x1em\x8fjs\x04\xa4\xbf\x8e\x11\xa0\xc8<\x97\xf1?\xed\xcf=\x1d\x156\xa8?\x9f\xaf\xb6\xf2|}\xec?\x0b\xea\xff\x1b\x96\xfc\xf4?\xfc\xbce\xa3\x1e\xf1\xb5?\xafB~\xbc\x15\xb1\x9e?\x05\xe8\x10\xfdF\xe6\xf1?{a\x16\xa7\x81\x1bj?1V\xd2*\xe6\x0e\xf1?\xdc\xfc\xf9!\xea\xaa\x95?\xf7X\xdb\x8c+\xab\xf0?\x8fpH\xb8}S\x8a?HB\xc3/q\xab\xed?\xa1K\xe6\x06\xde\xf7\xd4\xbfi\xc7\'\xeb\xb2D\xfa?\xf0n&\xa4\xbdy\xbc\xbfG\x15M3wS\xf2?h;\x06\x0f0\xad\xaf\xbf]b\x10\x16\xc7T\xed?\xa3G`\xe4^\xeb\x99?\x80\x88\xd5p\xc0\xd5\xee?\x84w\xca\x80\xc2\xa4\xb8\xbfN\xbd\xb7,7]\xf0?\xc1]z\x15\x00E\x98?5>\xbf\xfd\x89t\xec?>ST\x12\x07s\xb7\xbf\xec\xb6\x8d\xf3\x1c\x1a\xf2?SY\x8d\xee\x17)\xb1\xbf\xa6\xa7\xa7X95\xf5?\x9e\xe2\xe3N\xd1\xdf\xa0\xbf\xe7]\xbc\xcb`@\xf0?f\xaa-Z|\xf6\xc9\xbfe\x8f\xf9\xf3\x99\xb5\xf3?-!"\xba\xe1\x1c\xa7\xbf\x85\xa5\x12\xf3/\xcc\xf4?i\xf2\n\xcb8}\xc0?\x0f\xc7\x98v\xa0\x93\xde?\\\x03\xb0\xe9{\xe1\xfd?-LJ\xdak,\xe2\xbf\x0b:G\xdd&\x81\x86\xbf\xd2r\xf1\xe6\xb2\x89\xf2?w\xa6%|\x8e\xc9q?\xe9\x8b)\xe9L5\xf1?V\x97\xd0x\xad1\xae?5\xbd\xbe\xe8\x9a\xf2\xe7?\xe9xQ[@\x8c\xc5\xbf\xca8\n\x06uS\xf8?xk\xbc\xf9\xc8\xcc\xdd\xbf\xa6\x1d\x80)\xf6j\x08@\xc7\x17\x97u\xd7c\xb3?\x8d9\xdb\xda\xaa\xad\xf1?]\x0b\xce\x02\x1c\x87\xc9\xbf\xa2G\x92\xd64R\xf5?X:\x04wq\xe0\x97?\x90\xd2\xb07\x18\x0f\xf1?\xab\x99\xc59\xfcC\xbb\xbf\x12>\xc2\xa2\xf8e\xf6?\'\xe5Ql\xc4|\xc7\xbf9q\'\xab\x18\xcb\xf9?\x8et\xe8\xe9\xe0R\xb3?\xd5\x8b\x1e\x118\xaa\xed?\x91x\xf1a\xd9\xfc\xaf\xbf\xe1\x91\xf0\xd0\xf3\xa5\xef?\x08d\xf4\x9e\x98\x0e\x86\xbfzcJ-\xe7F\xf0?|-\xe8\xf6vW\xae?,t\xae\xb9\xecf\xee?\x18\xe4;_\x12o\xd5?\xfe\x90R$\xe1\x84\xdb?\xbdK\xed\x10\xfc\x03\xaa\xbf(a\x13\xe9\xd3\x94\xee?\x91G\xcc\x9dK"\xd0\xbf\xeeeK\xb2?\x08\x00@\x90\xaa\xa8\x98\\#\xbc\xbf\x8d.r\nBf\xf7?2]f\x9e\xd2\x95\xb6\xbf\xc0X\x9bt\xaa\x00\xf4?y\xecXZ5\x1f\x98\xbf;\xc3\xe7\x8c\x087\xf2?\x9cSC\x83\xae\x86\xb7\xbf\x16)\xa0\xd9%\xd8\xf1?\x07\xa6\x99\xf3l\x9f\xc1\xbf)Z\x81$\x91\xbf\xfb?\xc9\x00\xe4J\xae\x81\x98?>\xcaz-5\x8b\xed?1\x99iqFM\x98\xbf\xec\x97\xe8\xf7\x99"\xec?,\xcdRi\xaeS\xb2\xbf\x8f\xff\xb33\xbdN\xf3?\x1f\x89\xff\x18\'?\x1d?P\x0c\xf8\xc3:\xc2\xed?\x00[FY\xf8{\x9f\xbf}\xad\xcf\x91\x1a\x9b\xf0?n\xd1.\xdb\xd7E\xbd\xbf\x111\xe3\xbbmK\xf3?\x86\x16\x87\x8c\x85\xb9\xa1\xbfa\xc5z=3\x1e\xed?\xc4\xb8\xe7\x17~\xbb\x9a\xbf\xc5\x85\x157E\xf5\xee?*\x9b\xc3\x82:(\xd5?\x94Syt_5\xf0?\x9b\xe7\x86L\xac/\x7f?9\x93\xa1\xa3\x0e\xb7\xf0?'
p51
tp52
bag2
(g3
(I0
tp53
g5
tp54
Rp55
(I1
(I2
I421
tp56
g12
I01
S'\xf9\x95\xc8\xee\xb7t\xb7\xbf\xab\xe0\x888\x84V\xea?L0_\xc3\xfdt\xcf\xbf\xe2\xf2(.c$\xfb?H\xb5+Q_WE\xbf0U-r\x14\x1c\xee?\r\x18\xbc\xf8D\xea\xaa?\x81\xee\x9b4\xdd\xe7\xed?]\xf3k\x96\x05\xa5\xd6\xbf\xac\x83y;\x1c\x91\x0b@\x88\x168\xfa+\x18\x94\xbf5x\xb8\xad\x83\x0f\xf2?43D\x16dDz\xbf|\x985\xf5db\xf2?]R}c\x9b%\x89?\xa8\xee\xe8\x9a\xfc\xf2\xeb?\xf8S\xbfrU\xed\xbc\xbf6\xb6"\x1f\xef\xfb\xf4?\x00\x83;\x99\x87U\xc9?\x8d\x9f\xf4\x9f\xb6R\xef?\xd0\x9aZ \x16\x00j?\xbao\xec%\x90\x82\xf2?b\xa6D\xfe\xb3\x02v?q>\x12\xc8\x97\\\xf1?\r\x0c\t\x13\xb4\x8c\x8a?\x9e\x0f\x11\t\x06Q\xf6?\xcb\xab\xc2X\xa6U\xc4\xbf=\x1c\x15\xced\x12\xf2?(\xcf\x91x\xb4\xda\xb0?\xe7\x1e\xb1\xe6K\xc6\xe0?Q\x06\xb8\x06\x11\x86\x97?\xae\xc0\x00+c\xc2\xf3?U\n\xe9l\xd8\xb5\x9d\xbf<\xb4t\x18\x95\xf6\xf7?of7\x92\xa6\xf5\xa0\xbf,\x826y\xfa\xd9\xfb?^\xa1\x80\xce\xcf\xf9\x7f\xbf\xa6I\xe1\x8b\x90\x1a\xe9?\xc1+\x02\xd0\xfe\xf3\x87\xbf \xb6\xf6#\x97\x07\xec?\xde(\xba\xc7c\xde\xdc?3\x19\xd0\xe2\xdb^\xf2?($\xe6\xa9\xe07\xb3?\xe5\xce\xfd5]\xf0\xf1?3\xd7q\x99H\xf7\x86\xbfU\x04^yo1\xec?\xf3\x95\xb2\x1e\x92Y\x99\xbf\x15\x1b)D!\x8b\xf1?=\x9f\xa9~\x81\t\xb8\xbfj\x99\xb0\xce\x92\xce\xf1? \xb2\xbfQ\xc9\xbc\x8e?\xba\xd4\xc8C\xee;\xf2?O5\x13\xcf#\x90\x9f\xbf\xc4\xf5\xcc.\xe6\x14\xee?\xc1\xe0\xc7}s\xe8\xb4?\xa8\xb6I\xd4\xe7o\xf2?\x9d<9Q\xc2/\x97?\rY<\x9a\x04\x9c\xed?+tvE\xa2\x93e\xbf!\xfa\xa2-7\xcc\xed?ro\xb4\x04r\xa9\x90\xbfVV\xe3\x97\x165\xf1?[#Rq\xb0}\x93?N\x18\x05\xc2!1\xf0?\x87<\x89\x06L<G\xbf\xe9\xa6\xe0rJ \xf7?\xab\xcf*.\xb4\x97\x83?\x93J`\xfet\x08\xf1?\xd6\xc3frU\x99\xae\xbf5\xbd\xce\xd7\xa0\xfa\xee?\r\x060(\xe9\xda\xaa?qy\xfc&\x8ew\xe6?\x15\x90\x15\xb4\x1c\xbc\xb0\xbf\xc7\xf9\xce\xea\x9e\xd2\xf0?\x18\x03\x89\xb3z\x1a~?6\xe5\x06\x9b\xcb\xa7\xf0?3\xec\xad/s\xc7\xa7\xbf\xd6_eah\xf6\xf0?\xef\xa1!\x96\x82\xfe\xa1\xbfZ\xceL1\xcbj\xf2?\xa7\xbd\x8aP\xc5\'\xb6\xbf\xc98,\xe8\xa0\xa1\xf3?\x1d\xca\xc9\xf9\x9f\x83v?\x9a\xdbc\x8f\x94:\xf3?\xe5\xcf\xbc\x82\xee\x18\xb2\xbf\xa8I\x90r\x0e\x8b\xf2?asg\xb3M\xf5\xdc\xbf\xe8\xa9\x08\xfe\xfd\xe8\xff?\xbf\x816q\xdb$d?j\xe6\xce\xbc\x84\x8b\xeb?\xf7\xf4\x06\xe0\xe0\xd0a\xbfe\x13\x03\xd7\x95m\xe9?b\xc7l\xe1l\xd5\xa7\xbfkt\x8dG\xfb\xa1\xee?|\xee\r\x0ec\x01\x9e?\x82\xd6fz\xfe\xc9\xf7?\\\x06Y\x88\x04\x8bD\xbf\x81\xd3r\xcb\xf7s\xf0?\xd3/\xe8?\xb6$\xff?\x82j%\x0b\xb5/\xcb?\x1b\xb0\x85/\xa5\xc3\xd5?a\x9e{\xfbW\xa5\x01@`E\x19p\x02W\xb5\xbf\x95\x8b\'*\xaf#\xf1?\x819\xdc@/&\x8c\xbfs\xed#\xbb\xd3q\xf1?\xf5C5\xff\x8e\xb6\xa7?`\xff\x8b\xf2m\xe2\xe0?4#\xdfV\xa2\x98\xaf?P\xaaaS\x99\x9c\xe8?\rw\xeb`\x88\xd5\xa3\xbf\x9eM2,\x96\xfd\xe8?\xa5\x02\xe4\x1f\xbf\xb2\xc8\xbf\xfbRfK3\xe0\xfc?\x93\xf9fC\x05\xa9\xb1?\x9f4\x95\x8e\xe2.\xed?\xaai\xc1\x9fK#\x97?\xcf M\xbb\xc1\x0b\xf1?\x84\x95T{"\xee\xb8?D \xef@\xab\x8f\xf2?\x02\xf9\x9a\xfc\x98\xf0\xd3?\x02W\xe2}\xabr\xf0?\x07\xd9cvB]\x9b?r\xcf\xbc\xc4\xf1T\xf0?\xfd\xc9\xaa\x01\xf44\x97\xbfz,\xf2\x19\x83#\xee?+\xbb\x1b\x03p\xeb\xb3?\xf8Y|\x90@}\xe4?\xe6B\xf6\x99\xc8\x84\xa3\xbf\xfd\x88\x05X<\xbe\xef?A\xc8] \x18A\xc6\xbf\xa4#\'\x87\xd8H\xf8?\xc2\xbe\x03\xa3X\xe9\xdf?\x93f\xe0{\xb95\xfe?\xe8\xa5\xf2\x92\xf1j\xc2?A\xa6H\x94p\xa6\xef?\xa4;\xcf\xec4\x9bt\xbf<\xc8\xe1\xdd\x9c\xd3\xf0?\x13\xfd\x91\x1d }\xa3\xbfW\x03v(\x18\xff\xf1?D\xdb\xa6\xf4\xb4\xd5\xb0\xbf\x88\xa77\xa4,\x9a\xf1?\xb5\xf81n\x9e\xc2\xcb?\x193L\x11p\x16\xf6?\xf1B\x97\xb4\xf9\x82\x94?!\x81\x14\xb9\xb5\x12\xf0?:a\x86\xc3\xc1+\x8a?\x1a\xc9\xec8\x03W\xef?`\xca\x07Q\xd8\xa8\xaf\xbf\xf6\xe4\xba\xcf\xa8<\xe8?\x0e\x9b\x8a^]\x9c\xb8\xbf\xc2\x13\xeb).\xb1\xe8?(\x9a\xecJ\xc3I\xbc\xbf\xa4\xb00\x16\xa6$\xf4?\xe9\x8fcvC\x04\xbd?\x0c\xe8t\x88i\xa3\xef?\xe5\x18\xa9\xc8\xc9B\xa2?T\x00\x9b\xd5\xaet\xef?\x7f\x8e\xfeZ\xbaL\xd0?D\xe1oR\x9f\x80\xee?\xad\xb2*\xcd^\xee\xb8?mq\xcaM\x12\x92\xeb?\xee\xd8^\x15\xd0)u?(\r\x8f\xee\x89O\xef?S~[\xcb.#\x83\xbf\x10\xda\n.{\xf4\xef?\x07\xb1\xa5\x99\x80K\xb8\xbf\xf7\xa6-\xe51\x84\xed?\xa0\xdf\x0efK\xf1\xb6?\xc5\xce\x998\x05\xd1\xde?\xf3\xf2I\x89\xe6\xfb\xe2?\x83\x1f!\xc3\xdc\xd5\xe4?@:L\x11\x96\xa8\xb1?:\x88\xce122\xf3?\xe4;\x19n\xe1\x1e\x95\xbf\x9a\x1e\x96Op\xac\xf3?\xe6\x02\x95\x8a_D\x94\xbf\x17\x1b\x8es\xd8\x18\xf0?9\xcd\xa8=\x8f\x10\xd5\xbfd8e\xda\xcf;\xfa?\x02\r7!o\xef\xba?yqow\xc9m\xf4?\x19\x918]\xc0(F?\x12\x95\xbd\xe8&\xb1\xf2?yc\xd7!,\xa4\xc7?\xa1\xd9\xca\xe2\xd21\xe1?\x15;f\xa8\x0c\xf1\xa6?\xeaA\xe3\x86-\x9d\xd9?\xb34;\xd07\xdc\xae\xbf\x9b\x8f\xd5\xac\xbb\xb2\xed?\xa6\xfd\xc8X\xd7\xf1\xb3?~\x81\xcb/\xc5y\xf1?`\xd6\xb6\x7f\xe1\xdb\xa8\xbf\x12\xea\xd4\xf5\xec\x00\xf3?\xc34)\xf6,\xd3a?%\x8cA\x8d\xa7\xa2\xeb?D\xefH\xb5&g\xa1?\x80\xe7,\x18\x92\xb4\xee?\x05DZ \xf9\xd3\x02@H\x98\xfc&z\xab\xe1?\xb3@B\xe7U\xdd}?\x98\xcb-}\xc8X\xee?\xd6\xa3,\xff:N\xb5?\x01!\xb7\x94\xb5n\xef?\xf3\x82\x95u&\x8a\xcb\xbf?.k\x8fg\xa4\xf1?m\xd5\xae\x90\xee\xd0\xd2?\xa2\xe03q\xef\xc0\xeb?\x8f}\xe2\xa7d\xda\xc3?\\P\xdf\xc0\xcb\xb5\xeb?\xb1,\x0bX4(z\xbf\x10\x13(\xfeM`\xf3?\xf8\xa8\x02\x1a\xbe\xea\xbb?J\x84\xcc})`\xeb?\tG\\YG\xdb\xb3\xbf\xe0!\xd9\x9a\xc8\xef\xed?vQ\xaf\x9f!\xce\xb3\xbfr\xbeC\xd1\xd2\xc3\xe9?\xe3\x88\xce\xfc\xfa\xdd\xcb\xbfP\xcfL\xf61\xce\xf0?[\xe3u\x89\x89\x15\xa7\xbf\xa7\x1e\xa93\xca\xf1\xec?\x95=bNaO\xc7?\xe9C\xf6\\\xbe\xe8\xe2?g\xf4\xca~Z\x87\xd3?\x12\x9d47\xf3\xd1\xf2?\x9f\xba\x0e\x197\xa9\x8c\xbf\xbfH+\xb0G\x1f\xf1?\xfc\x89>\xb2\xb1\xbd\xb3\xbf8js\xe6X\x81\xf1?YD*\xf5\xfe\x01\x8c\xbf+nI\x90D\xf7\xef?t=6\xb04 \xca?O\xc6\x9c\xe6:\xc4\xf1?N\xd9\xe6g\xf0[t?\xa2+\x07\x94\x80\x8c\xf0?d\x89\x19D\x14\xf4\xd0?\xd8\x7f\x968n[\xec?\xc6\x0e\xbe\x95z\x14\x8e?n~\xd5c\x97\x9a\xe8?\x84.\xe7\xe0zI\xb9?\xefd#\x9e\x1ew\xf0?--\xb8\x17\x0b\x0b}\xbf\xd3\xd6X\xb4f\x05\xed?\xe6\xc2\x8b\xc0\x80\xbex\xbf\x96dz3\xa8\x81\xf4?R\x08d\xa5>\xb2y\xbf#\x80r\xb7\xecV\xed?\x92\xee\xbe\x9d\xb8\xca\xb7?\xa3\xba\x1f[C\x93\xed?Q\xfb\xd0<\xcc2\xab\xbf^!\xfe\xd1\xb2~\xec?\x11\x99fvQ\x1f\xba\xbfa\x9e\xa4K\xba\xa0\xf7?\xaaw+\xcd\x05\xa7\xa4\xbfB\xb6c\xfd\xa7\xc7\xf5?\xb9`\xc5\xc7\xe4\x84\xd0?[\x93D\x94V\xa1\xe7?5\xd9\x88~T\xbc\xad\xbf%l(\xcb$\x19\xf2?\x8a\xee<E\xb5\x82\xe7?\x1a\xfa"\xfb\xe2/\xf5?\x99\x91L\xf9\xd1\xd2\xc3?\xff\xcd\xf0g\x8a^\xf7?\xd98\xe2\xf3\t1\x8a\xbfs\x1e\xba\x98}\xc8\xf2?\xae\x10\xa8\x08\xe0%\xa8\xbfi9\x9b\xb4\x06\xc0\xe8?\xdd \xcf\x84\x87\x1a\xbc?Q\x02P\x9b\x17\x16\xee? 8R\x9f\x81\x96\xb9\xbf4\xa7\x16\xd7y\x19\xdb?\xa6\x08oq\x01K\x88\xbf\xa0@\x131qc\xef?\x1cU\xf4\xce\xe0:}?S\x03B4\xac\xf2\xef?*b\xea\xe0e\xfb\x85?\xa8\x11\xad\x9f\xcf\xe5\xeb?\x81Z\xf1\xa2\xa8s\xb8\xbfmN\xe9\xb5X\xc9\xef?N \xce\xeb\xf5\x13\xd9?\xe8\xd6XP]\xa5\xe8?\x85\x8eM\x9e\xa7\xc0\xc9?M\x9d\xe5rI\xd9\xe9?\xb8X"\xd1\xf1\xc3\xa5?\xee\x94\xc6\xbe\xaf&\xe9?>m!\x86\x87\xb7e?\xe7\xaa(AOK\xf2?\x9a\xec\x828\xeb?\xa2?\x94\xf2~\\\x0bM\xea?\xe4s\x92\x06Z>\x91\xbf\x05\xd3\xd1\x10IQ\xf5?\xbf\\\xf3n3\xa8\x9f\xbfN\x9b\x84\x18K\xc6\xf4?\x12\xe1\xa0u8I\x80\xbf\xa3z\x88|\x99\xd5\xf3?]\xc1\xd0\xcfE\xce\x91?\x0f\xa5\xd9\xfe;b\xed?Yz\xbb\xaa\xbc\x0e\xa5?\xb3W\x92\xf8\xb8k\xeb?\xd3\x80\xaa\x11\xe5s\x9f?\xd9\xf9\xcc:7m\xef?\x97\xb3IO\x87R\xc1?\r\x12\xbf\xd6\xbd\x1e\xc0?i\xdf\xa6\x81e\xb5\xad?A\x1c\xaa\xe0\x8f\xdf\xf2?KM\xb6[X\xc0\x99?{\x11\x91\xc8\xd9\xdf\xfb?_\x8c\x01g_@\xab?\xd5\xfa\x19\x82d\x90\xee?\x06J0\xd3\xa1\t\xc8\xbf\xc3Qnc:\x1f\xf2?6\xd7\x9ehZ$\x8b\xbf\x16\xf0\xd4\xf8"\xf2\xf0?\x04 \xb4\xcf\xe6@\xa6\xbf\x97\xa2\x1fyik\xeb?PBO \x02\xe2\x8d\xbf\xe6r\x15\x96dg\xf1?\xfdn\xdbM\xab\x0f\xa4\xbf\xf7\nv\xa7KQ\xed?!l+2\xc1j\xa2?\x98\xb5z\xe3\xa7\xb7\xf0?\x91@\xcb\xdf8q\xba\xbfF\x8bP\xb5\xf5\xf5\x00@\x81\xbfC\x0e\xcc.\xa5\xbfyk|\xae\xb7\xdc\xe9?V\x8b4y\x93\xd4\xb3\xbf\xd4{X\x9c\'\x1e\xf1?=\x05\xc2\xce\x80\xda\x95\xbf\xf0\x9a\x11\x8bby\xf0?"#\x8e\xaf\xb5\x1b\xad?W\xcd/\x8c\xb2]\xf0?\xd0\xff?\x06\x0f\x87\xc0\xbf\xee[2G\xab<\xee?\xf3\xdc_\x983\x9f2\xbf\x87\xeb\xbb\x9f\xecn\xf5?n\x81\xc1\x9f\x85&D?\xfa\xa2,\x92\xb3x\xf2?\xbf\x18\xe6\xf9\x9fF\xb0\xbf\x9a\xd8\x17\ta\xc5\xef?_\xab:\xcd\xa3\x8a\xb8\xbfi1\xd1\x8e\xae\xe9\xe3?\xd8\xb6\n\x9e$c\xb7\xbf\x14\x99n\x0f9\xb1\xee?\xf1ig\xfb%\xc7\xa1?v\x90b#\xf9\x80\xef?\x84\x11\\\x14\x8a5\xa3?"\x0e+&b\x0f\xef?\x90\xe2\x97T\xff\x93\xa8?3\xa3\xc0H\xa2\x05\xf1?a\xee\x8c\xf2\x83\xd9\xac\xbfS"\xa9U\x15\xa1\xfb?\xfa\xeb\xfd\xc0\x85&\xc1\xbf\xd4\xa5\xb7\x1f\xcbd\xed?bS\xd90\xa1D\xa3\xbfj\xcd\x96\t\xb6\x07\xec?\xb2z\x9e\'\x8a\x87\xca?=\xbd\xbf\x11\x9a\xd5\xec?\xaan\xf9\xdc\xab$\x91\xbfq\xa8\xbaB\xeb\xab\xf1?\xbc\xff\xae\xb2\xfe8\x80\xbf<\x1aw\xcb\x16I\xf0?\xf6\xe71E\x08\xb4\x95?\xd85\xe0\xaa\x04\xb3\xea?\xd9s\x90S\xe6\x8b\x8c\xbfTh2K\xb6\x84\xf0?(\xa9\x9d\xe13\xbe\x8e\xbf\x00\xf4\x81\n/e\xf2?t\xd2\xb2 *%\xa8\xbf\xe6\xc6h\xc8\x10\xa9\xf1?5\xbd\x80Y\x90\t\x99?n=N`\xdc\xf4\xee?\xaa\xa8tl\xe2\x0b\xf5\xbf\x01\xcdj\x1f\xb1\xf3!@\xfb\x0cO\xbb\x12\x98\xb1?R\x82L\x89\x9cY\xef?\xc0\r\xe6\x9b&\xc1\xc9\xbf\xe4\xea\xefV(\xd2\xfc?\xd5\xb8j\xc4+\xa5\xc0\xbf\xa7\xd6\x08B\xaf-\xf5?\xf6\xfbK\xfc\r\x1b\xa4\xbf\xab\x0b\xd3Z2\x87\xec?\xfbZR\xd4,U\xd1\xbf\x12\xf5\xa4G=\xf4\xf5?\xaeQ\x16\xa6\x99Z\xb5?&\x9a,\xed,\x03\xe3?B\x86\x19\xd5\xdcB\x81?p\x17\x13\x195\xd9\xf1?\xf5\xfe\x81\xec\'\xde\xb8\xbf.\xaf\xae\xfe\xed\\\xf5?\xfdk\x81\x12\xf2\xf2\xc0?zz\xc0\x92\xf3\x8d\xea?\xb0\xe3\xc9\x8a\xca9}\xbfN\x06_\xa0\x90\xcf\xf2?d\xc2\x06\x8c\xec!\xba\xbf\x14\xd7\x0b\x80U<\x03@\x18\x9dQT\xd1A\x89\xbfTm\xee~;\x8c\xee?\xd1 \x864\xb7\x04\x97?\xa7Q\xd3SW8\xed?\xc0\x06\xe9\xdc\xc3\xb8\xb4?\xea=\x04\x89\x90\xd8\xe8?l\xcc<\x10[\xdc\xa8\xbf\tf`\xf9\xff\xbc\xf2?T1Z\xcd\x17\xdf\xa0?+^\xc8\xbf\x8c\xd8\xed?I\xdf\xce\xf2\x7f\x80\xa3\xbf\xeb\xae^\x07"M\xf0?\x93\x91\xb9\x04\x92C\xad\xbf\x8d\xb5<KrE\xe4?R\xc6Z\x8b\xd3t\xa9?G\xcft\xc7E:\xf3?i\xbb_\xd7\x18\xb3\xb5\xbf\xc9\xaa6\xb8\xb5Y\xf6?)<\x11\x92\xcd&\xa7\xbfi7,\xec\xb0\xb6\xf8?\xd9q\x99\xbc6\x9c\xb8\xbf\x840\xd8<\xb7\xc4\xf1?|4of\x85\xcf\xc8\xbf\x93\\Ks\r\xa0\xf9?\xe7\xbcP\xebjX\xaa\xbf\xcd\x8eA\x14l1\xf0?~\xbb\xb2\x19\xe5r\xae?\xd2\xd2>\xd6\xd2Q\xf2?j;rO\xb4<y\xbfL\x83\x8e\xbf"H\xef?\t\x1e\xc3\x7f\x16cv?\x7f\x0e\xa0\xfe\xe9\x8f\xee?\x0b\\\xb3\x1e$\x91\xb8?\x18\x88p\xb8\xc0\x16\xee?y`\xff\xf5\r#\x9a?\xd4B\x86\'\xde;\xf0?\xf9\xaaq\xaf\x7f\x8d\xd9?\xff\x82\x8b\xa7\'H\xf5?\xb1\xca\xb7n\xc0\xf8\x92?\x97\xf8\xdd\x17\xb9\xb7\xed?w\xb1j\x94[a\xbf?>\x07\xce"]\xc3\xe0?\xb4\xc9\xdc\xcc\x9aIo?v\x9d\xdc\xadF\x8e\xf0?\x8e%e:\xc8=\xd6?\xc3\x8bc\xf4>\xa4\xe5?\x18\xdf5q\'\xd4|\xbf\xfd\xa6\xb4\xbf\x8c\x9d\xf1?R\xdb\xe4\x08u\xfa\xa1\xbf\xd8n\xd7\x92S\x8f\xe6?J\xa1\x1f \x0fCi\xbf]\x88k\xc7\xe8b\xf2?|\xd2\xf4\xf0A\x85\xaa\xbfc\xd5\xbak\xed\xf6\xf5?7\x1ar]\\\x11\xa1?\xa4#\n\x1e\xfb?\xe2?k\x92\xd1\xfe\xff\x01\x94\xbfh(@\xf8\xe96\xd6?Q\x86L\x8e\x0e\x16\xc0\xbf\x95#\xd7\x9f{\x89\xf1?\xe7\x9f\xdb\x89\x823\xa6\xbf\x11\x97\x1e\xb2\xd4\r\xe7?\x12gm\xc4\x0fV\xb4?\xa0\x8e\xa0\\XK\xef?\xd4\x95\xa4>\xc1\'s?{|\xcc\xc6\xd6\xca\xef?8\xae\xaf\xba\x19\x03\xbb?\x80\x93Y\xab\xed\xb6\xf1?\xd7\xd6a\x8f\x816\x9e\xbf\xa8\x8b\x0e?\xd4\x97\xf3?\x83\x15\xbb6\xb5Z\x8d\xbf!_\xc7\x8c\x9e?\xf1?|\xb8%|9\x17\xb1?\xcc\xa5\xf8\x0f\x8a\x80\xf1?\x99\xb7\xd9:\xf4\xfb\xb6\xbf\x85u\xeb\xf0\xf4\x0c\xf4?\xe7gg"v\xa5k\xbf\x1aR{\xf1\xbd\xf1\xef?\x87\x18\xecs\x03\x02\x81\xbf\xa0Y\xc2c\xd0;\xeb?/\x8c%\x8d\xc2\xee\xbb\xbfec\x91%S\x7f\xf3?\x0b\xfe\xe0\xf2\xe7"\xb3?OM]}/3\xf1?-W\x85\x84\xad\x93\xc4?i[(\x98=\x9b\xe4?\xcd_\xff\xaf\xbf`\xc1\xbf\xb2\x93\x84\xe0\x01\xaf\xf4?M\xcb\xaf/\xd5x\xbd?K"\xbeL8\x92\xec?\x8a\x80\xe96\xe7@\xae?\xc2\x01\x06?Iu\xf8?_\x19\xff\xf2fm\xa4\xbf-v\xce\xcf\xe4M\xeb?\xb5\x19G\xf1U\x8b\x94\xbf\x82\xc4\xd2>@\xe3\xf0?Tg\x18\x18\xeb\x0e\xa2\xbf\x18\x98\x07nc\xa2\xf0?M\x88F\x07\x03\xec\xc6?\x0c(\xad\x00ry\xe8?J\x04\x9a\xa4F\x16\xc8\xbf\x0eK\x1f@m\xaa\xf1?\xd1K\x8eE!@\xa9?A\xb6\x9c|\xf2\xdc\xee?\x17E\x9c\xdd\xfe\x12\xaa\xbf\x19+\xf33s\xed\xeb?\xfdK\x08\xc0R_s\xbf\xd6\x80\xc9\x8f}\x84\xf1?:\xf7\x07\x88S\xad\xa7?\xd3\x18\x9cu\x00\xf7\xe8?\xc850a\x84[\xa0\xbf\xd3\xeax\x1e\xd1\xfb\xf1?\xb1+}:}\x80\xb1?\x98\x1d\x86\xdd\x15(\xf3?X,\n\xd0\xc2\x1b\xa7?\xd1\xcb:\xb7F\xe9\xf8?\xe8\x9d4\xcbr\x9eT\xbf\'\xd8\xe7\xaa\xf7\xe6\xee?A~;S1IP\xbf\x93\xff\xd6\xb9O\xcd\xf0?4\x87\xdc4G\xeb\x82?\xad\xa73\xe6\x93N\xf0?\rU\x19\xcf3.\xb8\xbf\xc4\x9b\x08\xb14Y\xf8?=%.\t\x95\xc4\xc0?\xfa\xf0\x9bG\xb0:\xf1?\xee\x03\xa6W9%\xb0?\x10\x17\x91k\x02t\xd9?\x9cY\xb3\xf2\x05\xfd\x89?\ny_\xd2\xc20\xf5?\\\x8e\x10%Pw\x9f?\xaa\xb3\x08z\x868\xec?\xbd\xc0:\xe5\xa4\x84\xaa\xbf\xc1\xd5s\xfe\xa8\xba\xf0?W\xd6\xe9M\x9a\x7f\x8d\xbf\xf3\x00\xa6\xcb\xea\xb9\xe8?\x89<k\x1fV\xea\xbd?\xf4\xa7\xd2\x93\x95t\xe2?J\xc6\xe8^:\xf8\xbc?)\x8f\xa46\xb0e\xd0?\xf1\xb8\x00\xcf\x8a_\xb2\xbf3Z\xf8\xa4MS\xe4?\x9d\t+Z\xb3\x18\xb2?\x00{\\\xa3[R\xf0?\x8dI\xb8B\x16\xe1\xb9\xbf\xe5\xac>9\x00&\xf3?\xfe\xe3\xb64\x81\xc9\x90\xbfi\xfcwj\xe2V\xf7?+\xa1#\xd5\xc9\x95\xbc\xbf\xcf\xc9\xd48\xea\x9a\xf3?\r\x91\xe7\x99\x140\x97\xbfo\x041\x96\xe1\xaa\xf6?R\x06\x14m\xb2D\xa4\xbf\xe7\xb9\xf7\xb7\xe8\x93\xec?\x94\xdb\xda)?\xd4\x9c\xbf\xc6`C\xddV\x96\xef?[*\x0b>\xa5\x85\x94?\x98\x97\x91\xa2\x1dj\xeb?\x87UO\xd5\xb1\xbd\xa5\xbf?+WU\xd2O\xf1?\xc44\xb8\xe9\xf4:\x9a\xbf\xe8_$^_\x8d\xea?H\x88Q\xf6}\x18\x92\xbfc\xffR\xf8\xab\xc5\xed?{A\x0b\xbd}}\xa3?\x81\xa2\x006F@\xe9?\xad\x1d\tR\x8e\xbf\xba?\xdc>ve\x8a\n\xe3?\xc8\x03%\x8f\xe9U\xa3?\xd1\x8c\xffEUJ\xf3?\xc0{\x92\xe0\x95\t\xb2\xbfyK\xd5\xdbE\xab\xed?=\x8f\\\xe22}\xb7?\x972\x05\x9c&\x01\xe9?s\x85\xd9\x18(o\xaf?\x1b#\n\x02\xa4V\xdf?\x83XY\x00-c\xb8\xbfL\xda\x80j\x9ci\xee?\xe7\x07\xa15z\xa8o?S,\x8d\x92*\t\xe3?\x8f\x8f\x8f\x11\xf7\x19\xc0?\xa0\x7f\x027I\xed\xf8?\x963+c\x91Q\xbf\xbf4\xe4z\x8e`\xb8\xf5?\xfa\x05\x87\x1c\x99\xfe\xc9\xbf\xa7\x18\x8b\xa6\x95\x18\xf3?4\xee\x01\xd9.o\xc1?.\x86,\x96\xf9\xb1\xed?\x80\xeb\xc1\xd6\xa25\xbd?E\xd5\xf4\'\'\xa9\xed?k\xd2\x90\x7fg\x97\xa3?\xfb\x99\xb6g3n\xf0?\x19\xc8$\x8c\r\xe6\x90\xbf\x1am\x8a(\xb9n\xe8?\xfb\xd3\xc3S\xef\x8d\xae?\x98\xcc\x1e\x12\xfd\xcb\xec?\xd5\x019\xbd\xd7\xa1\xaf?\x03\x97\xf7\xdb\xe3\xcb\xf1?$\n\x7fW_\xc9\x94?\xde\xa8\xb9\xab\xc9\xe3\xe8?^\xf2\xac\xb5\x03F\x91?\xbe\xd9\xb15)\xef\xf1?\xd6mD@\x07A\x99\xbf\xcce\xd5u\x0eW\xf2?\xb9\x93}\x86\xfc\xfa\x9c\xbf\xb9:u\xb9\xdfC\xed?\xcf\x95z\xc4\x90\xd0\x99\xbf\x82\xf0\xd4\xce\xec6\xe8?\x98\xb1\x90\x87$\x84\x9a\xbf9\x00\xe7\x01\xf6\xe4\xf0?\x94\x7f4\xf9\xd8k\xa9?>\xa3\xe5\x08\xd2\xae\xfa?\x94\xbc\xb1\xbc\x90\xb2\xba\xbfMR_\xe2E\xd3\xf1?y;w&\xb0\xfa\xc5\xbf\x1f\xce\xbf\x8a<\xb4\xee?a\xf3}<\x96I\xa0\xbf2\xf0\x987r\xfe\xea?\xc1\xf9\x7f"\xf93\xb8?t\x99\xb6<JQ\xef?K\xd0\x95i\x0e\xd4\xaf\xbf\xcb\xe8\xf9Cs\xe2\xef?\nVD\x10r\xa3\xbb\xbf\x18\xfd\xa0\xa8\xe8s\xf7?\xe6\xcb~\x89\xf0g\x9d\xbf\x03R\xa6\x8dR\xf6\xf0?\xdd\xc0\xcd\xa4\xf7]\xb6\xbfb\xb89t!V\xf5?IE\xf8\x88%.\x02?\xda4\xd3\xf2\xbe\x9c\xed?\xb2^\\\xc7\xf8Al\xbf\xc53\x9f\x08\xcd\x1f\xf0?\x15|\xcfFV`p\xbf(\xb5m\xe7\xf5\xcc\xf5?a\xff\xf0\x92\xbbZ\xa0?\x12c\xf4\x80\x9d(\xf9?{DU\xdc\x80\xc9\xb3\xbf\xdc!Q,\xe4u\xee?\x19\xa5\xbeN\x00\xa8\xaa?z\x89:\xfe\xa9\xa9\xd8?\x97\xbac\x06\xf1b\xf8?\xfeN\x84UVu\xd4?\xba\x87\x0eq\x82\xf2\xbb\xbf\xaa\x06U%"\'\xf2?2\x90\xfaP\x1b\x9c\x94\xbf\xddyk[X\x8e\xec?\xa2&\x04\x99`\xce\x91\xbf~\x9b\xe8\xce3X\xf4?V\x1f.\xf4\x1b\x1f\xba?\xc1\x0f\xd3M\xc2\x7f\xeb?1\xf351\x8d\x96\xbd?\x91#\xbe\x04\x12\x1c\xeb?\xb2\x8dv\x98\xec\xc6\xd0\xbf\x9b\xd4\xbb\xdc\x89z\x00@f`\xa9\xde\xd7\x94\xb1\xbfk\x95d\xf7\x0fm\xf2?\xf7R\xf7?\xc3\xa1\x9a\xbfY\xcb\x97\xb0\x828\xe8?\xfb\x06\x1b\x88\x88%\xaf\xbf-Sq\x80\xa7\xf8\xe1?\xd9\xb7\xcb\x92\x89\xf1\xc2?\x83\x14\xbah\xa7\x01\xf4?x3\xc1A\xd7\x8f\xa1?\xad%l\xad1s\xf1?\xe7\x86J\n\x06D\xb9?5\'\xedco\xfb\xe7?\xea\x02\x82\x02\xcf=\xb3\xbf\xde\x89\tK\xbb6\xf1?\xcf\xef8\x93\xd8\x03\xa4\xbf\xac\x12m\xcd~@\xf0?&o\xef\xca\xe3s\x91\xbf\x81w\xa5M\xd3\xb9\xed?x\xbe.q$\xae\x91?\x9dm\xfe0\x1b\xc2\xf2?\xb1\xed\xee\n\xf0R\x8e\xbff\x0ft@\x1em\xf1?\xc8\xea\xb1\x08\xfc\x89\xab?\xa0\x1a\xf4\x83\xe8\xaa\xed?.\xa0\x07\x95|$\xb2?\x04;\xdb=\x8bP\xe7?\x9b\xf6\x93\x03f\'\xa8?l\xbb\x90\x0b_\x9b\xf0?\xdf\x17Z\x05\xdd\xeb\x96\xbf\x85\xb1\x8b\xe9\xa2\xf4\xf6?A\xf6\xd1\xa0;\xe9\xb1\xbf\xfc4\x0bH\xf1\xfe\xfa?\x0cB\xf3!\x88\xe0{?\x97c\xe9C4\xd7\xef?z\x1d\xf4\xe61\x18\xc4\xbf \xf0]\x04\xcf\x90\xf6?:\xe6\xa0\xc16_\x9f?C\x8e] \x16\xad\xf0?\x1c\'|\xb0\xf1\xb6\xab\xbf.\xf0;\x8d\x80S\xf0?\x02\xc89\xc7\r\xd1\x88\xbf\xce\xd5\xde\x1d,K\xee?\xeec8\xc8\xfa-\xab\xbf\x02\xbag04\x00\xe1?^]\\N\xb9p\x9b\xbfqK5\xaa\xd7\xed\xf1?Gv\x1f\xd3\x88h\xc6?\xe9\x7fH\xba\xbc\xe0\xed?%\xdcA3\x1a\xa2\x8f?\xb3\xd3w\x02\xe8N\xf5?\xdd\x0cQ\x92\x08f\x99?\xea0\x9c\x86&\xbe\xee?0\xeb!$\xaf\xcd\xc5?\x0eR`\n\xaac\xf1?\xbd\x120H\x83\xb8\x96\xbf\xc6\xe1lM+\x14\xf1?\x0cR\xbe/\x95\xab\x81\xbf\x9cx\xfe\xca\xa7\xca\xf2?\xb9\x9e\x9d@}\x9bv\xbf\x15}X\x85\x91\x83\xef?hC\xfc;\x03F\xa1?\xff?\x9e*tL\xf0?(\'\xdfO[\xc3\x95\xbf\xfb\x8e\x8bk\xf0\xc4\xee?\x1e\\\xd3,\xca2\x93\xbf\xe0\xdaqY\xe0\r\xef?F\xddd\xc1\xbe\xbc\xbc\xbf}\xac-\xa1RU\xed?\x89\xb5\xdc\x97\x02\x8e\xc2?\xd7\xcc\xdb\x01LJ\xe7?d\x87\x94\x03\x80\xbfs?\xeee\xa4f\xbd1\xf0?\x10Jc\x8c*\x03\xca?\xce8\xca\r\xac\x97\xea?,\xa0\xe2h\xa6\xdb\xc1\xbf\xe1\xb4\x8b\x85x3\xeb?\xa2\xc9cH\xd8P\x91\xbfBA\xa3\x04\xb1z\xf1?3\xc3"/\x0c#V?T\x060s@t\xef?1/D\x95\x1cN\xa6?Xm\x8d\x8d\x16\xdb\xef?\xb9"\xefE\xa5\x07\xb3\xbf0d5\xdf\xc7\xc2\xf0?\n0\x96\x96\xef*\xf7?oc\x93W"^\xe3?\xda\xd3\xf3\xb0\xf81\xca\xbfM5\x15\xffz:\xf0?\x97\x0b:m\x1a\x93\xbb\xbf\xd3e\x84\xb4\x9f\xd7\xf2?Az\xb7\xe6\x88\xa2\xa2?\xa55\x08\x97>\x90\xf2?8Rrp\x98\x90\xa4?\x8c\xb9\x8f\x96\x8e_\xf0?\xf6\x99\xfc\xbf\xef\x12\xa6\xbf`\xa2\x15\xf2*[\xf5?\x15\x99xj\xcc\x15U?\nw\xa9L\xc5\x12\xeb?\x87x\xbd\x11N1\xbc?\x87\x00\xdb\x97j\x17\xfa?\x93?u\xba\xba\xe3\xb6?[\xdc\x94\x02%\xd8\xf6?fN\x12D\xb2\x14\x9e\xbfJ(\xae\xef\xda\xd5\xf5?\x0fc\x15\xfa>\xba\xa3\xbf\x83\x83\x8ad\x88\xa8\xec?\xa4A}\xe9r\xea\x94\xbf\x18\xd6\x1a\xddH\xf5\xf1?$>(O\x84\xe7\xb2\xbf&\xab*\xf9\x17K\xf6?\x90\xc1\x0b\xe4\x901z\xbf-\x87W\xe9\xd0&\xef?\xf4\xef|\x01$\xf4\xa4?/\x0c\x7fJx\n\xef?\xe0\xfd\xbe\xa6f\xd2k?\xee\x8d\x13\xebT\xe1\xf3?\xbe`&\x06\xc8D\xe1?wzF\xb0\xeb5\xe4?J>\xaa\x86*\xc9\xba\xbf:*Z\xa6\x01\x13\xf5?\xf86\t\xdc\x0c\xfb\x9f?\x03="\xb9j\x08\xf1?O\xa4\rS\xc9\xdc\xca\xbf\xe6\x089*\xc7 \xf5?\xbd\x16[G\x01%\xfc\xbf\x9d\xc8k\xb7\x0b\xbc"@\x97\xd9E\x8f\x11\xc5\xb3\xbf\xb4\xcf\xb0\x8d^n\xf2?Izf\x8c\x08\xbc\xe0?p?^B_\xf9\xf1?\xd3\xae\xe8#\xf0j\xe1?\x9f\xc0\xeb\n6?\xe0?\x98\xc25\xb4<\xde\x86\xbf\xe4]k\x16&\x98\xf1?b\x93P\xb9\\,\xbd?(\xf4\x0fM\x8d5\xf0?R\xa3\x92\xc8\x92\x94\xc5\xbf\xea\xa3\xba\x80\x97\xb9\xee?L}M\xac5S\x8c\xbf\x93Qt\xab\xe6H\xee?r\x95,Tx=\x90?\x81\x15\xc4A\xb5\xf9\xf2?\x8b\xb8\xac\xb2\xe4U\x86\xbf\xed>\x0c\x9a\x8eZ\xf6?\xbd\x9ev\xff\x84\xa9\xbb?\xfa7\xfa-\xc3 \xf5?\xd1\x0e\x96d\xf6"\xb9\xbf\xfc\x91B\x1e^\xc4\xe9?\xea\x89\xd0\xac\x8b\xfd\xa9?\xb8\xe3J:\xda;\xe8?z\xa9E\x866\xd5\xd5\xbf5\xd2\xfa\xa0A\xb2\xf6?\xf2\x86\t\x92e\xbb\xa5\xbf\xaf\xee\xe9\xdeo\xf7\xf1?zB\xb2\xc7p}\xcf?\xa6L\xda\xe0\x97[\xe7?kT\x94)\xf2\xd2\xa7?#>\xbc\xc98j\xe4?\xaf\xf8\x18\xe40=\x97?\xa3\x04\xc9\xb6\xeck\xea?\x04\x87\xb6:\xdc\x03\xb1?\x80\x18\xfcF?>\xee?)\xb95_\x87\xc3\xab\xbf\xb9\x802`\xe8I\xf0?\x80X\x0b`\xab1\xb2\xbf/\xb1F*)\x1f\xf5?zj+\x91K\xa7\x8d\xbf\xe9\xac}\xc5\xcf\xa1\xea?\xff\xbf[\xf8o\xd8\x81?\x1e\xb4\x81\x97\xf9p\xef?\xb3\x19\xa1\x8e&\x85\x91\xbf\x1e@\x14\xc0ZS\xf3?\x0f\xf8<M\xa9\x98\xae\xbf\xcc\x868\x95\\\x96\xf2?8\xda\xeaK~\xfc\xa9\xbf\xac^\x1e\x8d\x13\xae\xed?\xb5\xd4\x07\xe4\xa1=\xc7?\x10\xbb!\x04A$\xe8?\xc4\xe8\xd4\x06\\\xef??P\x86\xfd]5\x16\xed?\xfc\x16\x90\xea\x86\xeb\xb2?\x12\xf8\xa2=6\xc1\xef?\xe3\x89\xa3\x9a\xd4j\x9b\xbf\xda\xf5\x9e\xffU\xa5\xef?\x19\xec\xbe\x92\t%\xa8\xbf\xab\x98\x9a\x81\xf8S\xf1?X~\xb1jH\xfbc\xbf\x8b\xf3 \x9c\xd4\xb6\xf1?\x07\xd5K\x83\xd3\xe8\x81\xbf\x06\xbfm\xebr\x8a\xf3?\xfc\x00\xfa=9(6?\x13\xd9\xbfK\x024\xee?'
p57
tp58
bag2
(g3
(I0
tp59
g5
tp60
Rp61
(I1
(I2
I438
tp62
g12
I01
S'\xfe\xe4\xe4\x1f:\x02\xc3?\xa8\xf8\xb7H\xa9\x10\xe9?\x07\xa9u\x9b\xf5\xbd\xa6?\xe6\xe7pr\xdc[\xe4?\x88h\xf4\x1c\xac\x8e\x88\xbfu\x1e-\xc8y\x9e\xed?J\xed\xbft+\xb3\xb6?\xdau\x9a\xf6\xc7\x98\xeb??e\x1c\xf8\xd7\xa4}\xbf%\xd8\x8a\xb3[\xdd\xef?]\xf0\xbd\t\xbd\xfa\xc1?\xf0\xc1\x10 \xcd\x9a\x02@K\r\x8c\x9dW\xee\xaa\xbf\x1f\xbe\xba\xe6CA\xed?/\x1c\x8e\x96\xa0*:\xbf\xd5@\xfd\xb8h\x94\xee?\x9bX\x1b@\x9f\x19\x98?\xe6\x02\x90,\x8a\x90\xe2?=p_\x85"\x95s?\xd4\xd6\xd8l\xc1i\xe4?\x06\x97:h"9\xa5\xbf\xfc!\xab\x14\xd5]\xf9?#\xe5eC\xa1\x1f\xc6?\x0e\xb5\xff\n\x83\xa6\xea?_\xc4\xbc\xdd m\xb8\xbfQ\x82S\nb\xbf\xed?X\xde\x94\x86\xc8\x84p\xbf\xb2E\xa0:\xf9"\xf2?\x83J\xa0xL\x0f\xb9?\xe5\xd4%\xcf3\xaf\xf2?(\xc1U8\xbeT\x90?\xe6<n\xfcu\xca\xed?=_~\x8b\x08\xa1Q?\x17U\xf0!\xeeo\xeb?\x13G@\xba\xcc?\xbe\xbf\x9c\xd0\xea.\n\xcb\xea?3\x92\x0e\x96\x13j\xa0?q]\xa1\xd2\xa8\x8f\xef?\x97q\xed\x9b\x94\xb8G?\xcbA\x8f\xaan#\xf1?X\x91\x08\x7fk\xed\x9c?\x9d1\x1f}#\x8b\xf0?h\x17|\\&N\xb3\xbf\xedut\xa2\x8d-\xf6?{\xb42\x06^\x05\x9b?[\xf9J\x1e^\x1b\xef?gJ\x9aP\xc1\xe1\xbd?\xac\xbd\x9b\xd7vV\xea?_-<S\x06\xaf\x8a?\xb1\x97\x9ame\x83\xe6?<\xaa3\x83\xec\xfa\x86\xbf\xe1\xa0\xa79\x1aI\xf2?\x84\xb0\x9e\x83y\xb3\xc6?\xfe\xed\xeaO",\xd5?K\xaf\x91\xd7i\xd9\xa3\xbf>\x08n\x8d\x04\x97\xee?\xc2\xf5\xe9\x9b@\x91\xa2\xbf\x0e\xa1\xfe\x01\x11\x96\xf1?\xbey\x8fI\xfch\xc1?f\x90\xad\x0ct?\x01@]}*q\x030\x94\xbf\x9a\xdf4\x11Mo\xf2?4\x0c\xfc\x1fV8\x9c\xbfxm\xb7\x0eia\xf1?\x18\x8c\xda\x1fHl\xb4\xbf0-/B\xd9\xb6\xf0?\x06\t`\xe7\xf9\xf3\x88?E\r\xdb\xb3&\x8e\xf1?M\xb0Kc\xbb\xe2\x9f?P/\x93\x07\xef\xda\xf0?U\x9f!6\x98\x8d\xa0\xbf\x9c\xbb>5\xc9\x92\xf3?x\xe7E\xfb\x11r\x8b?U\xf6!\x0b\xe2D\x01@a\xd8p\xbe\xbe\x19\xb2?\x02\xee\xa5R\xde\xd5\xe8?f\xeb\xb9\xe4W^\xad\xbf\xef\x01\x89\xa9\xda@\xf2?\x00\xb3\x91\x9bm\xd3\x97?\xb9=;\xacq9\xec?\xc7\xb7,\xf0\x12\xb0\xa0\xbf!\xa8\x9e&\xd8\xe5\xe9?P\xae\x9bO`\xb5\x94?\x98\\vl2*\xf2?e\x1e\x89\x16\x93O\xa7?\xfe\xb8\xe7.\xe5~\xf0?(d\x07\xed`-\x90?\x91\x8f\x0e?Kl\xf4?7\xdf\x8a\xceg\xbc\x9d?\x80\x90R\xbb\xc4a\xf0?\x00~\xd6\x98JD\x84\xbf\xa0\x83\xe8\\\xcb\xc5\xe8?\x80\xben\xc2\x8f\x8f\xb1?\x8dX\x01\x02\xc4\xfc\xe1?A\x19\xac\x81G#\xb3\xbf\xf8\x94P\xbb\xba\x17\xf0?\xcf\xe34\x8e\xbb\x8f\x0c\xbf\x91=\x85\x1c\xe6U\xeb?g\tC\x87I\x18\xa8\xbfLrJ\x19\xed\x03\xf0?rK!14\xf7\x8b?n5Zz\xed\xa3\xf5?\xdc\x90F\x0bd\x9f\xab\xbf\xb8yp\xde\xcf?\xeb?Q\xce\xd2$?d\xbd??\xd34\xa0R8\xe9?\x08\xd3\xec\x1b2$\x9f?\xb0\xd5lrC\xd7\xee?\x97\xce\x07\x93\xa6\xae\xe4?\x95\xb0\xd9\x80\x96\xed\xdf?\xed5\xbf\xc89\xb8\xc3\xbf\xb2\xf0\x11\xd6\xbaM\xf8?\xdc\xce(M\x95G\xb4\xbf\x84\xddl\xcf\x98\xeb\xe9?\x0b\xee\xc3\x9bN\xbel?\x19\xdd1.\xa7\xa6\xf0?\x15\xb6l\x04\xa1e\xa4\xbf\xf6:\xcct\x9b2\xe8?)\x1e\xab\xad\xee\x07\xa0?\xbdO\x84{\xa7\x98\xf7?\xca/\xa6\xe2\x06U\xa5?\x94=\x16Ho@\xf5?\xff\xfcW\x99\x8f\xa6\xac\xbf\x82?s\x19>>\xf8?\xb3\x84zg\xd0\xaf\xc1?\xaf\xd0`\xbee\xa2\xea?\xbe\xc2-\x97\xd8\xf3\x95\xbfy\x8d\xad)\xea.\xe4?\xa4\xb2\xbc,J\xfc\x90\xbf\xd8"\xa6\xd6\xa4Q\xed?3\xa88\xe3\xeb=\xac?\x8c\xe8\xd1\x12\x1b\xe0\xf2?\x9f\xfcO\x96\xc3c\x82?\x9b\xcf\x1ba.\xaa\xf0?#\xa0\x07I\xca\xdf\xa3?p\xd6\\\xe6i\x1f\xec?i\xb4N\xf1&S\x95\xbf\xe4Q\x04\xee\xd0\x80\xf1?\xe1\xbee2\xb6\xec\xc8\xbf\rh\x8cC\x88\x9f\x00@G$|\xe7<\xe3\xb2?\t\'.\x81\xf4\xcc\xe9?\x89\xe7?V\x12i\xaa\xbf\xf1g\xf2]7`\xec?\x88\x04\x94\x178\xdcK?\x19\x82\xef\xb8\x1b\x1c\xee?\xf6zb\x05\x89\x91\x86?V\xdd\xe9O/\xdb\xf2?\xb6\xf9\xb1{]H\xb6?h;\xc7(R\xa3\xef?f\x07\x0f\xfb\x96\xb8\xae?R<\xd6\x89j@\xe8?\xe3\xf8\xfb\xfch@\xd5?\xf7j\xf5\x86\x9d"\xf4?LeZ\x84$\xc7\xb7\xbf\x18uA\xc9\xd8\x91\xf0?^\x81\xe3\xc6u\x97\xe6?Y9\xa7z\x9b\xfc\x06@ak\xf6\x89\x00%\x9b?\xef\x89\xa3\xc0\xd0&\xf3?\xe6\xc8u\xf9\x83\x0f\xb4?\xf7\xd9w=\xff\x01\xe6?\xa0\xf8\x9cal\x99\xb2\xbf)_\xa1\xda\x9b5\xef?\x91G5[>\xd9\x93\xbf\xadI\xaez{R\xf7?\x19\xbc\x10\x1c\xaf\n\xa7?OPD\xfc@B\xf0?\x9e\xb0.\x82\x18&Y?\xb0\x8d\xc0\xb8\x1d\xed\xf1?wT\x95m\xd2\x08\x96?-\xde-\xd6\xafk\xeb?D\xf3\x1c\xaf?n\x8c\xbfo\xe1\xce\xb3\xba\xfd\xee?\x84L\xdfETje\xbfJr\xcf%\xb6\x1a\xf1?W5\x7f\xbb?\xee\xbd\xbfuG\xab\x1c$\x17\xec?\x8c\x12\x18\xb0P>\xb2\xbf\x0f\xdc\'\xa2\xb0\x1d\xf7?o\x12\xec \xdfh\x87?#\xdc\xbd\xc4cz\xf2?\xfa\x87\xb6\x1d\xa5\xdb\xac?\x8ak\xaey\x01~\xe2?"J\x8d\x82\xe7\xfc\xa5?\xae\x85K\xec\xdc\x81\xe7?*\x80:L\xab\x1c\xc0?l\xc5W\xaa\x8d\x87\xeb?\xe7\xaa\xdcFco\x9b\xbf\x1b\xf3\x97\nY\x9c\xf2?A\x1b]\x90\xe30\xa7\xbf\x87\x15\x1c\xf5<,\xf1?\xc2\x0c\x92*W\xf1s?A\xb8\xc7\xa39\xf3\xf0?\xd7R\xd0\xcc\xb6Tg\xbf\xcb\xf5\xdei\xbd\xc6\xe8?\xe8f\x7f\xbf\x9b^\xb0?]?\xb1\xa6D\xa8\xec?\xe1\xb6\xee\xf1\x0c\xe3\xbd?Nq+P\xc4\x90\xf0?\xc0\x1c\x8f\x04hf\xb3\xbf|\xd6\x14,V^\xfb?a\xd8\x11\x96\x0b\x0b\xd1?\x9d,\x15;\xbf/\xe8?GPDq\x85\xcc\x9a\xbf\xa1\x97\xbb\xe1\xf0(\xec?0\x009\xbdB5\xb5\xbfM\xf6\r["\x13\xf7?"+\x87.\xe9\xa1\xc3\xbf\x90\'\xab\x08\x0c\xe4\xf9?8\x1c\xdc<\xdfT\xaa?\x9e\x04\xd3+\xec[\xea?hE\xa2\x9c\x9f\x15\xa6\xbf\x05a\xd5\x0b(\x00\xf5?\x95\xc6V\xebV\xdd\xb3\xbf\xbb\x1d\x01z\xe4\xf2\xeb?^{\xf2\xd8W\x81\x90?RI\xf9S!\xd2\xec?\n=/~\x8b|\xb9\xbf\xa0J\xcf\xf5\x9fo\xf4?\xa5\xe6+k\xe2\x17\xa7?\xa3\xff\xd7\x85B\xbf\xf3?y\xe0}\xd8f\xfc\xc4?Q\xdet>\x12\xc1\xf0?\xb0>\xf8\x15\xf1\xb8\x83?8\xc6\xa0<\xc1\x89\xe2??\xc44\x14\xf5\t\xc4?\x16>\n\xcd\xd0\x11\x00@\xf1\xb4\xd7\x1e\xf0{w?\xb8\xbc\x96/\x18\xbe\xf1?\x84qo\xbc\n\xde\xa5\xbfhO\x07\xe4\xb7\x91\xe8?\xa9\xb99OK\xfa\x9c?\'wyI\x8d\xa7\xe4?Q]$\xab\xd0P\xa5?\x16\xb7\xdc\x96O3\xe9?\xf8G\xbe \x93\xd7\x88?\xb7\xb7\xa0\xb7\xa9I\xf0?\x0f\xae/\xb7\x90\xea\xa5?G\xf1\x93vJw\xf0?\x162;\xb9\x0fg\xa1\xbf\xfb\x85U/NN\xf0?\x7f\xd1Bau\x07\xb4\xbf0\x03h\x8a[\x05\xef?\x9f\xb2\x83\xea\x96\xf5\xaa\xbf\xf9\x92\xae76\xcb\xf2?\x04\xb4\x1c\xf0\xd3\xc1\x97?\x04sA\xcdWI\xea?\x88|6\xe8s\xba\xb3?u\x0cV\xe8\xe3\x11\xeb?\xc9k\x94\x02\x1e\xf7\x98?\xbb\\\xa7F\xb40\xeb?l\x94\xaf`\xbbC\xc3?\xbb\xb7\xb6E\x9d\xdc\xdd?\x10\xe3RZR\n\xb7?\xf3\xbd\xc5\xda!\xb9\xee?\xa5\x81\xfdo_\xfc\x97\xbf\x98\x04\x8b\xd6\x8f\xf9\xef?\xca\xdd\'\xe4\x1d\x91\xd0?\xae\xf4}P\xef-\xf9?\xd0W\xce?\x8f\x89\x92?Y\x83\x1dn\xee\x9a\xeb?\x07}i*\x80\xea\x8c\xbf50\x9d\xbb\xdb\xc5\xeb?\\\x14\xc8\x04`\xf0\xb1\xbf\x1f!\xae\xe0\x03\xd9\xf3?\xc9#\xe0\x0f\x11\xe0\xd0?\xcb*\xc7V\x03T\xf2?*\xd4\x92\xfb\x17M\xb4\xbfo\xff\xdc\xe88{\xf2?\x1aA\x18\xa7\x95c\xa1?\x19\x11\x06w\xe6\xa7\xed?\xfcVK\xccR\xb5\x98?|\x8a\x9a\xeeW\x85\xf4?\xa8\x8a\xdf\x1a\xbef\x95\xbfTn?=\xe9\xbf\xf0?14\x0fP\xf92\x8b?`\xfc\xda\xed2\xaf\xed?\xac\xc2\x05\xae\xd9\xd2\xa6\xbf\x99\xcc\xba>cH\xf0?\x90\xeb\xeehj1\xb2?\xd4!Rq\xb8[\xdb?\x13m[\x8dT\xff\x93\xbf\xb0\xcd\xb5\xea\xb2\x91\xe7?\x05{;\xc22[\x92\xbf\xa00\xad"y\xb9\xee?\x08\xb2\x19\x1cm\x87\xc8\xbf\x07e\xc3AN\xc2\x07@\xa3\x0c[\xedO\xdb\xd0?\xcb\x7f\\\x1d\x0cz\xf2?H\x05\xff\x0f\x91"\xb1?^\xcet{\xd2\xbc\xf2?\x97(\xd9-\xb1\xec\xa8?Q1\xb7\xb2\xc9E\xef?\x80\x84\xec4a(\xab\xbf}\xed\xe6\xd9\xb6\x94\xf3?4\x06\x1b\xc0\xa4{\x9e?\xe1L\x1c(7|\xfb?\xeb\xf0m\xd1\xf3\x1b\xb6?\xb3T\x14\x12\xb2\xb5\xf9?\x18\x93!:\xe04\xba\xbf:cJ\xb9_\xf8\xf1?Ve\xb8\x0b \x95\xba?\xa7e\xbd\xc8\xdb\xd8\xed?\xb5\xba^\xecyF\x93?8\xd7_\x13`X\xe9?\xd05\x1e\xa0\xd4\xb5\x8d?(~{\x89]j\xe1?i\xa4\xfd\xfa\x97z\xb4\xbf\xban\x08\xb4|\xaa\xea?\xe5\xf9@\'\xd5\x0b\xa1?\xf1\xd9\xfdm5\xeb\xe5?\xd9\x03\x877\xc7\xbd\xb5\xbf\xc6\x94\xfe)g6\xf1?\xfe\xe2 \xc70m\x93?\x9b\xc5\x0c\xec\xe1\x10\xec?7W\xe8\xf8\xe5\xe8\xb9?Y\x7f(\x11\x99\xb6\xe7?H@\xb4\x07\xa8\x83\xac\xbf*u0\x1c\xf9\x1a\xf9?\x96\xa7\xdf3\x07+\xac\xbfCc\xe0\xd7\xf5\xad\xf1?UF\xb4O+>\xa0?dpc\xab|\xb9\xf4?S<\xdb\xfc?\x00\x9a?\x88\xc9\x8eQ\xf1\x9a\xec?B\xabA+\x04\x98\xa3?\xcb\xdf\xc3\x065\xde\xea?5\xb6t\xb2\xc1\x8e\xe1?0\xf9\xfa\xa5{\xe0\xeb?X\xb6\xab\x16\xcdU\x97?\x81D\xdft\xc7\xc9\xe7?c\xde\xc7\xc0\xc0\x04\xb1\xbf\xfd\xba\xfb\xac\xfbr\xf6?Es9\r!\xff\xb9?|\xa6\x9ehL\xad\xea?[\x11j#q\xc79\xbfq\x8bg\xa6g\xe0\xec?[\xf6\xad\x17\xc16\xb1?\x9fJSv\x0f\xc0\xf2?\xd6\x03\xbb)\x9ft\x8c\xbf\xdb\xec\xb6b\xa5\x13\xee?\x04\x9f\xb2\xf7\x8ct\xad?^P(\x0eN<\xed?P\xab @\xbc\x9d\xce?\xe1\xa4l5\xaa\x9e\xec?\x93\x11y\x1b\x0e\x15\x9b\xbf\xbd\xd2\r\xbb\xf0g\xf0?dg\x0b\xe8\xfe\x1f\xe3?3\xd1M\xd4\xb2\t\xe4?\xc0;\xd5`s\x0b\x81\xbf\x08\xa6\xf0\xcb\xcd5\xee?l\xaaB\x9f23\xcd?b\x03\t\xe0I\x85\xd0?\xe3\xae\xc9\xa2\x92\x86\x8e?c\xd5\x87T\xa4\x02\xee?\xa9\xb2\x96pw\xeb\xa7?\x8f\xdcWFp\xdf\xf5?\xc6\xe5\xf4\xcf\x9f\xc9\xb2\xbf_\xd0D\xd5\x15\x10\xf1?o\x98\xec&\x0b\x81\xb5\xbf\xbe\xdd\xf5\x1eY\x95\xed?\x0b\x85\xbb\xcd\x07\x0b\xb1\xbf%\xd7\xb9\x82\xff\xdf\xf2?\xfa\xe7\xa2N\x1b\xb0H?\x16\xcf\xbe\xfbxG\xf1?\xce|G\x88\x82\xbc\x97\xbf\x82?!&vq\xf2?\xd8\xc3\xa7\x03t\xe5\xa5\xbf\x10e(,\xfd7\xf0?~\x10\xdc\x888\x96\xb6\xbf\xef\xb4\xa5A\xa9\n\xf1?\x15f\x19\xe268\xa2?\x18\x06\x10=\xdfi\xf1?\x17^\x13\xac\xf4\xc4\xa8?Z]$\x16>\x16\xf3?M\xa4\t!^\xe1\xba\xbfV\xf5\x02RjN\xf3?\xf9\xf7F\x04\x12,\xab?\n2\xa1g\xdc\xdc\xee?XE\xaf\xda\x1cJ\xa9\xbf{I\n:\xd5.\xf7?P\xbct\x1e\xff\xb4\xa2?\xc6\x94\xf6N\xbd\x12\xf1?\x88\x1a\xf4zy\x15\xc3\xbf0CU\xe3q;\x08@\x04\xa6\xe8e\x035\x91\xbf\x8d\x8d\xe3\xd9N\xae\xe8?\xf1\x15C\rz\x07\xc2\xbfu\x856\xc2CU\xf0?\xd7\x06:&T\x9c\xbb\xbf$J";j\x7f\xef?Db\xf7O\xa2\xbc~?bM\'\xd0\xc5\xa5\xf5?L\xc8\x9e\xa3\x7fk\x88?\x04\xa7\xf7.\xe1\xd1\xf1?\xadI#\x8b\x96\xdds\xbf\x8e\x9f\xcc%\x1bO\xf2?\xcb\'\t\xff\xe5"\x8a\xbf\xba%\xf7\xc7\xce\xc7\xf5?\xa7\x97\x195\x0b2\xb1\xbf\x04`\xbe\x00\x89\x87\xf3?/\xff\xaexL\xc0\xc2\xbf\x02\xfb\x8e9\x81\xc3\xf3?\x02\xa5\xe3:\xc79\x83\xbf:ER@\xbc]\xf1?\xd1n\x1fs\xfew\xa1?*D$\xc7\x1f\xa7\xef?\xba\xd7R\x0eE\r\xba\xbfH\xae\xbdT\x0f\x84\xee?\xd9\xa1\xa3\xa1\xcd\xee\xa2?^4]\x10\xb8\x03\xef?\x81\x87Y\x98B\xa4\xae\xbfqe\x19^dl\xe8?\x83\xe9\xb5\xacd\x85\xc3?\xb3\xb7\xd1\x12M\xcf\xe6?\x98"\xd8\xab\x89W\xd1\xbf\xe4_B\xde\xb8\'\xfc?\x11\xb64\x03\x9c\xbc\xbd\xbf\xdb\xf2\x0c\x0b\xa3\xa5\xf5? q\xfcu\x8cM\xbd\xbf)_G\x92R\xbf\xf2?\x8b\xc0\x17\xd4\xb2\xc4\x83\xbf\xd3\xfc\x00/W\x1e\xf1?P\xadJgTz\xac?7N\xd2=\xe2\x91\x00@>O\xda\x80\x87\xb6\x8e\xbf%\x13\xce6\x83L\xef?)\xbc\xd6\xa6\xb6\xc9\xcc?\xa1@\xee\x81\xe4\xfa\xe9?~\x83\xd8\x0fO,\xae\xbf\xa5\xe0\xe9p\xee\xaf\xf1?\x0f\xb2\xe8h\r)\x9e?\xf7R\xa92\xfb}\xf0?\xf9\x87\x9b\x83\xe5\x0c\xb1\xbf\xbd`:W\x84X\xf3?\xc3n\xc3\xa9\xbd\x11\xb9?r\x13\x1d-v\xd1\xe8?\xb2\xbe\x9b\xae\xd6\x18\xb0\xbf\x7f\xb9j\xd1@\xd6\xed?>\x88\xdeK\x19\xab\xb2\xbf\xd9)\x1d\x08\x1f\x9e\xf5?P\xa7\xa3\xb5\xafm\xc6?/\x93\xe3X=\xbf\xcb?\x07&\xab\xbc\xf3\xe1\x82?F"h\x95\xfa_\xf1? q\xb5\xe5\xa3\xf8\xb7?\x15\xf5\xdcX\x16\xca\xee?\xac\x00b\xd9\x83\xb4\x9b\xbf\xf8&\xaa\xf2\xcdF\xe9?\xf3}\xa6R\xfc\xd3\xbb\xbf\x88\xf6\x86ed\xa5\xf5?\x1c\xf1\xdad\xf3\xd9\xa0?\xb0\xce\xb7\xa3\x89?\xed?\x0f\xceZ=<\xac\x96?\xf53\xb2\xe8P\x08\xeb?\x13\xcf\x96?\xe2e\xb6\xbfS;\xf0 ;P\xf8?\x1cU,\x84w}\xc4?\xecs\x88\x01\x1e0\xe8?#\x11\x0e\xb2\xee\x80\x91\xbfz\xb7Xa\x05\x9c\xef?\xaf\x19Mb\xf6\xfe\x86\xbf+ur}n(\xf1?\x9b\x99o\xe0\xb2\x9a\x8a?\xda\x07#\xfe\xe9G\xf0?\x158\xaaf\xca\xb0i?\xe8\x17\xf7\xc6\x8b1\xec?\xa1\xdb\xa1\xb5=\xe1\xb5?\x92\xa6;$(\x1b\xf4?}7\xf5\xb3\xb9&\x90\xbf+w\x00\x84\xe7\xe5\xf7?f\xe3^\xd4\xc9U\xa8?\x02\xe7\x1c\xa2\xb7\x00\xed?\xf4Rd\xc9\xed\xd7\xa6\xbfGa\x95;z\xa5\xe8?\x93[\xb5\xf3\xdc\xc2\xc1?\x95\x18\x82\xfe\xffi\xe7?\x0c\x1f\x8f\x07\xab\xae\x94?%\xd9\x91\xd4?F\xe2?\x18\xb5\x1d\xdf\xfaq\x9a?S\xe3\xba\xd7\xcc\x93\xe5?\x8f\x12\xf9\xb5\x89\x17\xbf?\xd5H++8|\xf1?\xe5\xebT\xba\xe0a\xa1?\xf3\xd9\x93\xed\xf8\xce\xf0?\xdf\x1b\x07\x9e\xb5\t\xb8\xbf\x97\xdbg\x04\x04r\xf0?\x11\x84\xe3\x8b\xb0c\xa1?w\xee\x0c9/Q\xf2?\xb7\xaeg|\xd6-\xa8\xbf\x10@/.\xa6\xdc\xf4?%\x08\xd6\xber\xb0\xa2?\xecR\xcd\xa1n\xcc\xe1?\xfd,uG\xb9\x06\xa8?\x81\xcbX\x8aGB\xf3?(^\xd9\xf9r\x96\xbe?0\xaa<\x8e\x02\xb6\xe7?\xed\x9a`\xd4\xc9\xc1\x85\xbf\x03\xab\xa7\r\xc8\x90\xea?\x96\xfe\xa1>\x1bU\x9f?t\xcd\xd4\x8d\xefH\xee?J\xf1\xb6\xcf\xac\xd9\xac\xbf\x94\x9d\x90*g\xc8\xf5?\n\xd4\x18\xe6\xca\xa3\xc5?\x0e\x88UH\xcd\xa5\xeb?\xb4\x7f\x8a\xd3\xb5\xc9\x99\xbfy\xed=\xa2X\xbb\xf2?\x8fK\x07\x11\r\x9b\xa9\xbfi\x1b\xe0\x04\xf1\xaf\xeb?&\x1f{8xB\xac\xbfT\x89J\xe1\x11r\xf4?Q\x1c\x07\xe1\xddl\xc3\xbf\xe9\x84\xf4\xce\xc0`\xf5?\xecsE\xb6;\x0b1?\x13\x14=\xe6\xe3$\xe6?\x03\xe5=\xf3s\x03\xb3\xbf-\xd8\x9bIp\x13\xf1?3\x1b\xb5g`\x1f\xc1?\xc0\x1e\xbb^E\xce\xef?\xb2\xd0\xe8K\xeeU\xc9?\xdc&\x80)\xb89\xfa?T\xdd\xbd\x16\t\x11X\xbf\xbb\xc2\xe1-\x80\xa2\xe2?\xe9\xf9[c\x14\xe6P?\xbed\x96\xe2\x1e\xdf\xec?\xc0h\xd8\xf0o\x8d~\xbfh\xef\xbeLs\x0c\xf3?\x88\x95\x05\'^\xec\xc7?\x06\xd3\x9b\xb7\x18\xa1\xf6?\x01\xebb\xb8Cs\xaa?\xeb8g\xa1\xc0\x84\xea?\xe0_\x9d\x8a\x18v\x8c?\x8aH\xdf\xb1,I\xf2?\x90\xf5\x1e\x05\xef\x08\xa7\xbf.\x9e.\x0f\x93\xce\xf1?\xe0\x16\x98\xcd5\x1b\xc2?\xb4\xe2KJ\xbd\xf8\xd3?\xcd\xad\xc0\x16\xe9\xd3\x83\xbf\x82kYx\xbd\xc1\xf5?\x05\xdbZ:U\xe3\x8d?:\x80^\x0chV\xf3?\xa2n\\\xf1\xab\x12\xf2??\x9b\x96\xfb\xbd\xee\xee?D\x03\x12\xfcP_\xef\xbf\x12\xf0\xba5\r\x99\x10@\xcd\xda\xe7\xc0\xf4\xed\xa5\xbf\xb4\xa7V\xf2\xcc\xa8\xec?\x802\x80\xa6\x14x\x94?x\xbc=&*\x9e\xf0?\xa0V\x08D\x1bk\xa8\xbf\x9fm\xf1M\xfbf\xf2?tL\xc6\xf3\xbe\xe5\xb5?K\xe0b\x96\xce\x84\xe5?89\xdb\x05Et\xbc\xbf\xb0\xfd|/\xe5\x9e\xf4??\x16\'v{\xa3\xad\xbf\xe7\xd6/\x89\x9c\xa1\xd8?\x92\xc5\xd4\x99\xe1^\xc3?\xf3\xce\xd0\xacrq\xe8?\xe3n\x1c\n]x\xaf?\x90\xb8\xcb+\xd1v\xed?E\x01\x1ek\xb8\xeb\x81?/<\xd0\xc9\x8cE\xed?\x97.\t\x01z\xff\x83?X\xfb\xebYe\x11\xef?\x8fk\xaet_\x99\x91\xbf\xee\x13`5d\x1d\xf0?\x8b\xc2ec\xfe\xb1\x96?\x19\x1aLMI\x94\xef?\xe1\xd9\xe6\x92\x8b\x9f\xb9?E\xc5\xa1\x1dP\x1d\xe4?_@2\xb9C\xb8\xb3?p\xa8\xb3\x7f]\x96\xe7?\x9dBs=\x98\xd5\xaf?\xd5\x1b\xe42\x86\x93\xf5?8\x18\xeb\xc5\xf2\xcb\x9b?\xd7\xf9\x00L\x10\x8e\xf5?^\xa6\xc8\x9cK&\x92\xbf\x04\xe1\xc1\xc7\xdb\x89\xf5?\xce\xeb\xd6j<q\xa1?\xe3\xb2\xd6\x9c\xfb\x0b\xf0?\xc8:*X\xea8P?\xf8\x9d\xeb_5\xd8\xea?Fe\xe0\xe9\xec\nh?z\xba\xb9\n,\x82\xe8?XC\x180\xd8P\xa3?\x98!\xa9\xdb\xf3\xc9\xe5?PA\x82\x9c\xe7\xa3\xa2?\x9e\xee\x14\x8f\xc5\x14\xee?\x9a\xe2\x17V1\x0e\xaa\xbf\xec\xdc\x7f\xde\x88*\xf4?9U\x15\xf6\xc7#\xbe\xbf\x94y\x83\\\x85\xa2\xf0?\xa7\xbe\x16Q\x83-\xa9?\x0c{\x92\xf99d\xf0?\x18\xf3\xa9rF\xea\x91?[\x94%\xce1O\xef?\x95N\xaa\x18Oj\xb4\xbf\x9c\x87\x82|HT\xf3?\xcc\x91(\x9b(]\xbe?\xb2\xdb\xc5\x0c\x16E\xed?z8\x03\x0c\xce?&\xbfv\x8a\xfe\xe4:\xfd\xed?L\xf6\na%\xe7j\xbf\xf1\x01 v\x91\xaf\xf1?\xb8\xb5Wc\xbe\t\x87?\xea\x03\xcd\x0e3\r\xf4?\x8c\x86\xd0O\xdc\xa6\xad\xbf\x1e#7\x99S\x06\xf1?\xb0\xb1\xd6\xb1df\xb0\xbf]\xdb\xe6\xe6O\x01\xee?\xa2\x13\xc6\x9d\x9d&o\xbf\x12\x14)\xfb\xcb\x19\xf1?\t\xef\x05\xcd\xe8\xba\x90\xbfi[\xad\x82q\xef\xe7?\x95\x81\x11f,-\xb2?!\x9aC"n(\xe7?\xdf\xb5\x00\x96\xeaD\xb2?\xff/\x8c\xbf\x9b\xf1\xea?\xbc"L0\x845\x9f\xbfg<Z\x16U\x9d\xf0?%P8\xf2\x0fp\x80\xbfd\x92\xb5\xff\x7f|\xe9?+\xe0\xb7\xe3\x0f\x9a\xcc?\xc7\x03\xdb\xe5GG\xf6?\xbbM\t\xc7_\xb8\xb7?fG\xd9\x9c\xd7\xd5\xee?\n\xe1\x1d\xcc\xbe\xba\x96\xbf\n\xad.\x1f\xa6\xc2\xee?c\xba5.\x89\xaf\xc0\xbf\x0eYYo\xb3\r\xf4?\x8a\x05\xec\x93\xee\xf9\xae?n\xe5A\x05\xe4\xe0\xe6?\x14\xc0\xd7$\x80@\xce?\x841#R\x1d^\xf7?\xc5\x07R\x1f\x9a\xba\xbd?\x19\x0b\xca\xb3l1\x02@~\x83\xc3\x1eu\x7f\x8a\xbf\xc6\x97l\x0f\x0bp\xf4?9\xd9ff\x1ft\xb9?\xb6\xfb]#CW\xf5?\x05\x10i\xe0\xa4\x1a{?\x0e"k\x05Tt\xf1?\xdcQ\xa4\x8e{"\xbf\xbf\x03j\xe6kNW\xf1?\xe3!\x06M\xe2\xf0\xb0\xbf\xbc\x88"\x86\xee/\xef?\x13hC\xc6lt\x97?"\x10{f\x0e\xa4\xed?\x12L\x80\xc6\x82y\xb1\xbfu\xb4\xa4\xc6\xa3\xbc\xed?\x03F\xde\x88\xe8T\xbb?j\xf2\x8alZu\xf0?\x08n\xdf\xb6\xbd\xe1\xbb?\xddTQQ\xd1\xe3\xfb?X\xc0a\xc3FT\xc4\xbf\xc3\xb3\x8eA\x08&\xf4?>\xf9=\x17\x16\xd5\xac\xbf\xee \x1f"Z\xb6\xed?H8\x98(K\xc5\xb1?\xbdhJ\xfbI\x80\xf4?\xb4\x91)N\xca\x17\xb2\xbf\xddl\xa3H\x82\xf3\xf4?J\xbe:\x0f\x1c\x06\xab\xbfw\xa0\xd3\xc8o\xc8\xf4?)\xbf[F\x0c\xac\xbf?V\xab\x88^\x10\xdc\xf8?\x1a\xeb\x19T\xca\x81\xbd\xbf\x1e\xc4\x13U\xbeG\xeb?\xf3\xf8\xb3?\xc1\xb8\x9b\xbf9t\x00\xb8\x06\x98\xee?Y\xdc\\\xde\xd6\\\xa2\xbf\x89\x8c\x19n\x93A\xf3?.ww\x00\x1e\x9c\xad?\xdd+\x00\x1d_`\xf3?c\t\x15\x0c?\xf6\xb4?\xfb\x10\x19Dl\x8d\xe8?Y\x0e\xd1\xe4\xbd\x01\xd8?>\xd5\xe6\xdc\x9es\xfd?\xabM&*\xae-\xc9?\x92y\x9fx\xc2\x90\xf6?\xfb\xe6\xc7\xa6\x8d\xb1}?\xe5\xecX\xbb\xa1\xa3\xf1?9\x99\x83\xe00\xb4e\xbfl\xa75\x15\xce\xf1\xf1?\xf0vq%K\x1ah\xbf\xfc\xd7\x13\xe9u.\xee?\xa2-\xe2\x10]\xa5\x9f?8\xbb\xf2\xff\xe9\xc8\xef?:\xc3\xc0\xea\x9f\xb8\xb0\xbf\x89D$t(;\xf1?f\x1a\xd1\xd6\x13U\xb6?\xa1\x87+\xba@\xbf\xe9?e\xff\x93#q\xe2\x9a?\xb7;\xb9I\xee\xce\xf2?{\xc2\xd64Tk\xbe\xbf\x02~z\x05\xc0\xa8\xea?\xfc\x80\xebZ\xba\x05\xbb?\xb0h`.\xfb\xdd\xe7?q\x96)>\xc7-\xa4\xbf\xa0\\F\xdf\x84\x88\xea?\xfcFY\x9c\xde\xf0P\xbfM\xd2#\x17\x8d\xb5\xf1?\r:]\x8b\x9e\xb2\x9c?\x11m! c\xa0\xf2?\xd7\xe6\xd6\x91\xf6U\xa4\xbf\xf4\x81^\xbc\x8c\xde\xeb?+\x8b\xceM\xcc\xf7\xb4?n5\x9e~jd\xe0?\x95\xc9}\x01\n\xf9\xa7?\x97?N\x95\x93\x87\xee?\x85lZec>\xa5\xbf\xa75o^@\xea\xf1?~\xc7\x8c\x16o4\xcc\xbfl\xf5\xa7vGT\xef?\xd0\x90Vb\x17\xad\x91?\x98x\xc11\x87\xd0\xe9?\x92\xae\xe1\xd7L\xa6\xaf\xbf\xdc\x03\xe3\x04:\x8f\xf1?Nxm\n`\x88\xad?Bgz\x98X\xbc\xf3?\x86\xaey8\x93}\x83?\x93\xe7\xc8\xc4\xf0\x8a\xee?\xc4\xb3\xb4.\xb1o\x9b\xbf\x9e\xbe\x03>l\xf4\xf0?\x7f\x02e\xff6D\xef?\x0b\xd0\xba0 \xe1\xf6?Q!h\x86\x16\xe7\xa1?dE\t\xf5\xab\xff\xe3?\xebQhh\x87\x19v\xbfq\xd5\xb6>\xe0,\xf2?\xb1O\xec(\xd97\x80\xbf9 \xc3\xf0qY\xf3?\xd2\xc9\xbaxQ\x87\xcc?t\xaaN+\x17\xc7\xee?\x8c\xb1%k\xa9\xf6\xa6\xbfo\x84\x052\xb2O\xee?wN\xfe\x11"T\xa0\xbf!sL\x92;G\xf2?\x0f\xcf\x085\\\xcd\xc2?G\xf3\x089\x9e\x1b\xed?/5)-k\xf9\x83\xbf\xbe\xef\x1a\'\xf4N\xfa?\xc8\xb0\x92\x18>\x8bG?\xa3\xee\x8e\x06\xd5\x82\xf2?}\xd7\x82\xd5aB\xc5?\xca\xfbY~.\xb0\xef?\x08\x9e\xc2\x9a\xa8\x97\xb2\xbf\xbd\xc4\xa0wZ\x00\xf5?\xa5H7\x1bC.\xb9?\xa3F\xc7\x14_$\xef?{\x1dn\xe3\xc2(\x81\xbf5UOta\x11\xf0?\x08.\xfdP7@\xc5?\x08\x8b\xee\x8bp~\xe6?y@\xce\xb9\xcf\x97\xd6?SAy\x83\xfb}\x02@B^\x07\x02.\xed\x9a?\x81\x8fC*\x8eu\xf3?7\xf7n3%?p\xbf\xdf\xb5\xe5\xb6\xb6\x03\xf1?e\x15-o\x97o\xc9?\x01\x1e\xb8\x19\xacB\xed?hJ\xa5q\xa8t\xa8\xbf)\x82\x15e\xdcE\xf1?\xd6d\x12V\xe6dp\xbf\xf5D\xd8Z,\x96\xf1?\x14\xf1\xf62oO\x9b?Y@|3\xc5j\xef?\x97YHCo\xed\xc1?\xee\'*\xee\xdb\xaf\xef?\xa7\x1a\xfc\x17\xc0o\xb9?\'\xb7\x08\x13\x869\xeb?9F\xef\x00ie\xae?\xe0\xc5\x9b\xed\n\xa5\xfe?\x12\xbc\xc77\xb2\x86\x9a\xbf0\x8f\xdeF*\xb0\xed?\x1eo\xdf\x97\x06\'\x92?\x1b\x01Ra`\x8a\xe8?{\xd9+\x1d\xb5i\xa8\xbfV\x80VJX\xb8\xfd?\xbc\xb5\x82i\xa5h\xa2?o\x9c\xff\xb8\xbbP\xec?\xd0\xf6\x08Z\x02\xf0\x90\xbfa<\x06\xb6\xc74\xf1?b]\xab\x15\xdc\x83\xcb\xbf\xb4\xb7r\xd6Qz\x0f@w\xd8\x1a\xcb\xddE\xa0?Dv\xab\xfa%\x00\xf0?I\x13K\x182f\x93\xbf\x8b\x19K*\x83\xf5\xf7?\x16\xc7\xf7?\xd9\xb0\x8a?\xe3]\x185\x16&\xee?\xb0\x01A\xfb7=\x90\xbf\xa1\xed~\xe3\xa3`\xf3?\x8b=\xf5\x8b]\xf8G?+\xdbd\x9c\x1e2\xf0?\xdf\xf39\x8f\xf3!s\xbf\xd0T\'\xb9\x96\xe4\xeb?\x1e\xb9\xf6\x89\\ \xbd?\xdd:&\xda\xcb\x8e\xed?n\x7f\xf8\xfd\xa9\x05k?\xd4Wvp\x89\xdb\xed?6J+\x1da\xe5\xbc?\x8fG:*\xa4\xf5\xe8?Y\x87\xc9\x872\xd3\xa6\xbfQP\x9eX6Q\xf0?]R\x8b%\xd0\x92\xaf\xbf\x17(w\xff7\x0e\xf4?\xf2\x9bYtf$\xc8?a\xcfD\xc9\xfc8\xe8?\x1e\xeaOQ\xa8\x97\xdd\xbf\xe8\xf2\xe0\xfa\xd4c\x00@J\xb7\xb8J\xc5o\xca?\xb5\x9eGu\xf2\xdf\xea?#&\x1d\xce\x06\xd6\xa9?\xdd\x0e\xb4\x96l\xcc\xec?\xe9|uW\x96/\xb8\xbf\x91)\xac\xe3$2\xf0?\xeb\xdb\x9a\xa5\x7f\xa8\xa3\xbf]U\xf3_#<\xef?\xe2a\xd0<\xed\x9f\xc0\xbfos\xd7\x1f\xc8\x1e\xed?\xb6R\'\xa2\xeb\x8f\xaa?YL\xd7^A\x95\xef?c\xb5W\xe2\xca\x95\x91?o\xbf\xafU&\xfe\xe1?y\x90\x8f\x81y\x0b\xa1\xbf\xb4\xd7\xf8`9\xb3\xf4?\x99\xb7\xd2\x8e\x8b\x7f\xb5?z\xd1-OF\xba\xea?3\x10{\x94m_\x9e?\x0e~N\xf6|\xef\xf0?\xf2\'C\xb7\xf0M\xac\xbf:\x87\xce*\xc1\x95\xf2?q\xba5\xdc\x9e\x8e\x96?L\xfa\x1bjh+\xf8?\x1537+\x1c\xee\xa8\xbf\x88+`c\xf8\xff\xf0?\x07\x85\x1b\xa0\xc5\xdb\xba\xbfu\xb5\xc6\xd3o\x1d\xfb?x\xf9\x9f\xe5\x0b>\x82\xbf\xdd\xc1:\xcf\x03\xc2\xf0?\xf3\xd0\xb2\x1f!\x8e\xc1?w\x15\xb8G`#\xee?\x96q\x99\xb3u\x97\xa1\xbf_\xca\xd9\x80\xdb\xd7\xf0?a4v\xf5q\n\xb7?X\xef\x9fl\xdeL\xed?\x83\x92\x1b\x8f/O\x91?\x19^\x83\x0c<d\xeb?\xff\x84\xdf\xbd\xd8\xd4j\xbfD\x1a\xfa\xe3\xfb\x10\xea?\x9e\xb0}\xfc\xe5\x8br?\x18\x99\xad1\x1b\xa6\x00@h~\xd9vt\xa9\xa1\xbf\xe7\x9b\xc8\xb7%\x16\xd6?Ni\xa1\xb4\xb4\xb5\xb8?\xb5\x9d\xdax\x08~\xe8?\xb4_\x89\x16\xaa\n\x9f?sI\x97k=c\xef?\xc8P\xec\x19\xe3\xf4\x90?\x19p\x86g+.\xf0?\xe0\x14\xc9\x80\xb2wj\xbf\x12W\xdc\xa0SG\xf0?*\xc1K\xcb\x08&\xb0\xbf\xcd\xf2!\xcf7\x16\xe7?F\x83\x8d\xf7T\xbbu?\xa0n\xa4\xa1\x91\xa4\xee?s\x9b6{\xe4\xbe\xb1\xbf3\xf3\x15D\xd1&\xf3?\\v7T\xe3\x16\x94\xbf\tS\xae\xb3"}\xf2?O\xb1\xd8\xc2\x89\xa9\xbe\xbfP\xa4\x9d)\xda\x8a\xe2?'
p63
tp64
bag2
(g3
(I0
tp65
g5
tp66
Rp67
(I1
(I2
I319
tp68
g12
I01
S'\xd7\xc0YFO\xeb\xd9?\x8d\xbe2\x06\xa8g\xed?\x8c\xd5\xdd|9\xa0\x90?\x15a(\xb8\xd1\xd5\xf2?=_\xcf%\xc2*\xc9\xbf\x8e\xef\xb9Y\xe8\xfe\xf1?\x05Ox\xe01\xed\xa6?\xe4[\x80\xee\xe8\xb6\xf3?\xf2,#\x97\xd8\xd3\xb0\xbf\x9b\xcd\xc4jA\x93\xf2?M\xc7L\x879\x9f\x90?\xbaX6\x15L\xd0\xf0?\xb1\x87\xdb\xe7%1\xaf\xbfC\xed\xadH\xc8\xcb\xf0?\xc0\xd9/^\xb4\x03\\\xbf\xb1\x0cn\xf9\x9a\xed\xea?\xe2\xe4*\xef\xf5@\x83\xbf\xc4\xa2\xca\x1f\x1ay\xf8?MZ\x7f\xcf\xe0\xe9\xdc\xbf\xe1\x88\xbd\x86b\xac\x05@\x9b<b9EC\xaa\xbf()%T)\x94\xfb?\xf7\xc3\x84\xe0\xc5_\xa3\xbfH&\xa0`j\xac\xf1?\x18u (\xdee\xb6\xbfy\xc3\xd5\x92\xef\xf6\xf4?\x18|\xf45\x84\x86\x80\xbf\xda\x839\xc7\xdb"\xec?L>\x0f\x8a\x177\xb1?\xad\xe3\x99G\xb2\xf4\xe9?\xdc\xbe$R\xe6\x0b~?u\xd3p0\xe8\x0e\xeb?\xecJ\x89\xcb\xc9%t\xbfd)\x19+\x0f\x08\xf0?\xfe\x00c\xf7h\x15\xd7?l:pm:\x99\xea?\xb7b\xb4~\xa8\xee\x90?\xf8}\x02\xe2\x9dv\xec?\xd7\xa9\xed\x81D\xbc\xad\xbf:kV\'6z\xf0?;\x11\xa5\x12\x92\x94B\xbf@;\xf7\xe3\xa0\t\xf6?r\x89]\x1eb\xda\xaa\xbf\xc53,\x0f@B\xee?\xa7\x19\x8a\xc2\xa3\xab\xa5\xbf.\x18~/\x1f\xf4\xee?\xcf\xa1v\xbd\t\x18\xa9\xbf\x893\x15\xa0=\x0b\xe8?\x1f>z\x1c`\x83\xa6?\xe5\xde<\xd4\x00Z\xe7?}\xc2$\xff\xdc\xb8\xd7?\x8f\x18_\x90\xa8\xa4\xee?\xd1J\x84\xa6\x19\x15\xc1?\t\x89\xaeT\xec]\xea?m\xd8\xdd\xc7\x87B\x97\xbf\xcds\xa0\xe3\x8d\xfb\xe9?pnR\x8f\x86o\xc5?y\xb7k\x96\xd6#\xee?\xcc\x12\xc0\xf9\x87\xcd\xb3?\xbd\xb5\xa1\xf5\x86\xbd\xeb?\x94!u\x048{\xa9\xbf~Q>\xad\xfdZ\xe6?\x8fgS\xcfg\xc0\x90\xbf\x97RW\x89y\xd3\xee?\x13\'\x9a\xec\x91\x96\xa7?Q\xb0\x94\xd0\xdf\x93\xf2?\x15v\xf9\xc6\xe7w\xb6\xbf\xbc5\xc2?+\xce\x05@=U\xd4\xb4\xf5K\xbd\xbf7\xbb\xb1Z11\xf2?1\xc0\x9f\xd6v\x03\x87?\xd5\x87\xb5\xbe\xdam\xed?\xcf\xc4G7\x91w\x92\xbfG\xf4\x86\xec\xb8\x99\xe3?x\xb9\xad9F\xa5\xa3\xbft\xc7\x1ezT]\xf2?a6,\xe4\x03\xb1\x82?B\x8d\xca\x98\x9c{\xee?8\xb71\x0f\rF\x9e\xbf\xaf]\x90\xadBu\xf0?\xa0\xb6\xbb\xc6\xe9\t\xa8?\xd3\x989\xd0\xd8\xc8\xeb?\x80\xa6K\xe7JZ\x7f\xbf\xadd\x1d\xa2?\xae\xf0?\xf4\xab\x14\x93_\xc0\xcf\xbf%P\x8d\x03%\x15\xf5?\xe9\xf8\x7f"\xb0\x0b{\xbf\x9d\xc9\n\xc5\xb0\xd2\xf2?y\xcb\x8bZ.\xa3\xac?T\xb7\xf2\xf7!\xd2\xe8?`\xaf\xf1%\x82\x87\xb3?\xc0\xc8>\x82+\xe9\xe4?\x12\x10\x18\xe8\xa9\xc0\xa0\xbf\x8f\x88JC"\xfc\xe5?\xf8\xaeaHX\x0b\xa8?\x1d\x85\x89\xa7\x01k\xe8?\xfc\x05\x98\xf5\xd8\xd2\xc2?\x02\x8ex\x8c\xf2\xb6\xef?]\x05\xfb\x1d\x15\t\x9b?\xbeU|\xe4\xb9J\xf0?c\x03\xd6\xb9\x97\xeb\x19\xbf]\x06\xebb\xe0:\xf2?+\x11L6\x88y\xb6?\xa7\xf8\xee\xa8\x85\xe1\xf0?\x9a\x96^\x18mC\x8c\xbfT\x83&\xc2\xcdX\xe6?\x11)\nM\x87\xca\xb7?\x1a\x85\x99H`q\xf7?\xbf#v[G.q\xbf\xb7\xbf\xfd\\\xaft\xf9?t\xf7\xf7\x16\xee5\xb7\xbfhb\xe7\xdbu\xb1\xe5?\xf5N\x16\xab\xbea\x99?\xb7\xfe?\xd1K\x91\xde?C{\xfee\xc0\xed\xa6?\xd0\xf9\x95l\t\xf6\xf3?p\xabHU\x91|\xc4\xbf5o\xfb\xd7C2\xf3?Y\xd9\xd7Q\xf8\xdb\xb5?\xe8?;=O}\xf4?\'\x99\xfe\x86\xb9\xa6\xc1\xbf\x8eifp}\xe7\xf7?\xa8y&\'#H\xaa\xbf\x15\xa3\xbb\xedv\xad\xe6?\xa9W\x93\x11\x15\xd1\xcd\xbf%r\xd0=\xa4\xb0\xff?\xf5\xeb}~\x85\xeaT?/k\xc35-\xfe\xe9?\xf3\xd2y{k\x89}\xbf\xa0\xa1\xef\xc5\xda\x05\xef?\xcd\x93T@\xaa\xe3\xae?.\xf2l1\xe6\xd6\xe4?\xc9\xb2\xaaH\xd2}\xcb\xbf\xa7\x93/\x10X\xa2\x03@\xa5\xcd\xbdi\xf9+\xb2?j\xee\xec|\xa35\xd3?\x0b\x11\x1cL\xcb,\xb5?\x03l:\xe9\xa7\x82\xef?\xca`b\x0c@\x9f\xa6\xbf\xf7#\xde\xe3*\xbd\xe8?4\xa0\x12\x8fZ<\x95?,\x18p\xd6\x18\xe5\xe9?\x8f\xf8z\x7f\xacu\xc1\xbf\xe2\xd7&\x1cBz\xf1?,u\xc5\xc9\x9bL\xb0\xbf\x9bve\xbd\xdf\xb7\xf3?\xa5\x14\xc2\x88\xc7\x19\xb1\xbf\xc5\x19G,\x9bB\xf0?\xdc\x8c\xfb\x82\xb6\x8f\xad?\xb0\x04Lq\xa5F\xf2?\xf1\xdc\xb0\xa3j\xba\x80\xbf|5,\x82\xa5\xe6\xf1?\xe1\x8d\x87\x0f5\xe9\xc7\xbf\xe1\x17\xact\xdb\xcd\xf1?%6c\xa5Hq\xd7?^\xee\xdc;\xf9\xcf\xe4?\x17\x15X\xaa\xb0\xb4\xd2\xbf\xea\xe2\x95O\xf8[\x01@S\xb1u\x9f\xb7\x7f\x94\xbfD\xd6\x8a\xa9\x92\xe0\xf3?~\x11V\x9a\xe4{\xc4?B\xb5\xdf\xc4\xc6\xdc\xfe?\xf6\xdc\xccs\xb8%\xc3?[\xd7\xf74J\xa8\xc4?\xcc\x15f(&u\xa3?\xec:v\x8f\xe44\xf8?#ym\xe2\x83\xa0\xc8?\x10\x16\x99b\xba$\xeb?\xf4\xceV\x04\x0cQ\xc6?\xb4\xac\x15C\t\xa3\xe1?\xfeWH\xc09\xe44\xc0n\xf7\xe8\x85\n\xeeO@cxrc\x0b\x13\xba\xbf\xdcj\x86x]\xb1\xfb?\xba\n,`\xaa\x93\xb3?@c\x936\xb4\xec\xf1?\xd8\xcd\xe5\x10\x9f\x8d\xb0\xbf\x97c\x1b\xc8\x97\x1c\xf3?9\xaf\x16u\xb3\xa5\xba?\xd4\xc9\x7fN\xef2\xe4?i\xfd\xdal\x1a\x92\xb4\xbfj\x02\x00{W\xd4\xf3?\xaf\xe42\x181\x94\xa5?z\xf9\x00\xb3P\xdd\xe9?ZL\xbf\x07\x8b\x06\xc7\xbf\n\xdb\xb5\x10\xcd\x01\xf5?\'\xfa\x8a}\x08x\xd2\xbf\xd6t\x91\xd0\xfa\x80\xfe?\x92\x10\xe5\xca\xb7F\xc8\xbf\x8b\xc9\xe0\xd0\xc0"\xfd?\x019\xdfU\x9b\xf2\xb9\xbfC\x03\x87\xab\xf1\x14\xea?\x7f\x93\x9f7\x1b\xb5\xc5?m\xe5@\x98\xbc\x11\xe3?I\xa8\xbdf\xf1w\xc6?\x04cd\x1d7\xc0\xd7?4J\x00F\x14\x00\xc7?@7\x8b)\xdf\t\xf8?\xb5\xd5\xbc\xbe\xa2\x9d\xc8?#\xb8\xde\xf7\x87\xcd\xe2?"\x00\x14vf\xaf\xac\xbf\x1b\xa1\x93,\xef`\xf6?\xce\xe7\x99\x892\n\x9e?\xdd\xb3zN@\x03\xef?\x1aBZdJ\x19\x9b\xbf\xedL\xbc\xfdZ\xb7\xef?\xea\x9eQw\xfe\xd4t\xbf\x05\xa4j\xbb\xa7\t\xf4?{k\xc7tV\xff\xdb?kZ\x16{B"\xe5?\xfan\x86T\x82\xc7{\xbf\xbe<\x12/\xf1\x96\xed?\x93&\\\xa1PK\xae\xbf\xad}G\'\x08<\xf3? \\\x9bz\x1bP\xb1\xbf\xe4px=\xc4\x1c\x0b@\x99\xe5\xb2\xa9\xe5V\xa2\xbfd@\x03\'\xfe\r\xf2?y\xb7\x0eZ\xa2\xbeB\xbf\xab\xc1\xd0\rS\x10\xed?\x97\x0f\xeeW}\x10\xb6\xbf\r\x8b*\x0b\xcd\x99\xf1?\x13k\xa1\xf1\xa5\xaax?\x05\x8e\xfa\xc2\x8e*\xf0?hO\x88\x08\xe0\xde\x9b\xbf6R\xf1\x04zb\xe1?\xeb\x8d\xa6\x15&E\xca\xbfy~D\x90\x0f\xb4\xf5?\xees\x03\x98\xbeQ\xad\xbf\xaa[c\xa5\xcd\x7f\xee?1\xa8\xe2\xc0\x9b]\xbc?R\xd4\x18\x0e\xedl\xe6?\xfd\x97]\xf7\xf5\x0c\xb0\xbf\xda\x14\xc2\xff\x07\xc9\xe1?#^O_\x9c~\xa3\xbf\xc3\xe0,\xbfw_\xf3?\nm\x9d\xda8\xf3j\xbf\'$\xb9\x9d\xa5\xd3\xef?\xfc\xbd)\xf5\x10\xab\xc7\xbf\xb7\xaf\x18\x18\x1f\x7f\xfa?)\x00\xf09".\x9e?\xad\x9e\xa7\xa4\xce\xf4\xec?\xa3\x8d\x95:\xf0\xfd\xb7?\x00R\xc8\x9bv_\xdd?\x06%\x80x\xd9\x86\x95?^\xa1\x0b\xe3\xe1\xa2\xe7?\x83X\xe8\r\xcd\x98\xa3?\x86\xf7z\x83M\xd1\xef?wI\x9d3\xcc|\x9a\xbf.u\x9eH\x93L\xf1?0\xf0I(\xab{\xa3\xbf\x1fG2c\x8dR\xf0?bg7\x07\xc5O\x97\xbf\xa2O\x02y\x92\xb1\xf3?\x86\xe4@A\x1e:\xbf\xbf\xce\xb6\xde8AN\xf6?\x12\xff\x10\xf1#v\xa1?QZ1d\x98C\xee?\x9axl\xeaUk\xbf?\xde\xbc\xf4\x99\xfc\xb3\xf0?\xa4\xdd\xa36\x8dX\xa8\xbfzn\x8f\xc6Ea\xf2?Ym\x01\'\x08\xf5\xb9?K\x82\x06U\xefS\xec?bi\x7f\x00\xf5\xc8\xc0\xbf\x1b\xea\xa4PB\x04\xea?\x19H=&\x0c1c\xbf\x01\x12\n\x1b\xd1L\xf2?\xe8@^\x19\xfb\xb9\xbc\xbf\xde\xdc\x8e\x9ee\xc8\xf0?w\xf2\xd8\xceC2\xca?2\xa1\x91\x9ad\x1e\xe4?c\n\x7fT\xe9R\xd0\xbf\xfc k \xaf1\xfc?Ss\xf3\xa1yL\xaf\xbf\xef\x9b\xf3\x97\x93A\xf2?\xe9%\xe5\xd9g{\xc4?\xd0\xba,\xc2\xber\xef?3y\xb0>\x03\x9c\xa6?\x89\x019\x05\xe1\xea\xf0?\xf1z\xec\xfc\xf4S\xb9?\xe1\xc6#\xa2s\xf3\xde?a3\xa2!\x89\x83\xb1\xbf\xde\\K\xc1Q3\xee?m\xaf\xfb\xf8\xc76\xb5\xbf\x0fy\x88\xba\x9b\x06\xe9?\x16\x11\x8fL\xebM\xc4?E\x9f]y\x91\x07\xdd?\xe4A\xbc\t7H\xba?\xb4<,\xb1\x82\t\xf0?\xc5B\xaf\xb3\x88a\xa9?nM\xec\xac\x94:\xef?K\x19`\xcc\xf2\xc0\xbf\xbf\x9f\xfc\xffR\x99c\xf2?p\xdc\xa6\xd1^\x89\xab?\xee\xd8\x1e6\x87\x1e\xee?\xaf\x1f\xac\x8e\xf9\x95\xad?7\x9c\xe3(\xff\x14\xf2?\xaa\xc6/;\xf7\xaa\xdf?K#\xdd\x7f@&\xf6?\xbf\xe9$\xe5\xd23\xc2?[\x13+a?\xba\xef?\xbb5\xca\x93\xf2\xfd\xa8?\x9e\xc6\xdb%\x82`\xf3?\x84^\xb2\x83\xbd\xec\xce?\xe2\xa0\x87\x9fa\xf7\xe5?t\xf2C\xf1\x9f?\xc1?DZ]$\x1cy\xee?\xc3E\x1cg\x9a}\x9b\xbf\xff\xcdbu\x87g\xf0?z/Z-\x8aA\x96?/\xd3\x81B\xcb\xcc\xed?\x17\x9e\x7fd\x8b\xfc\xa3\xbfG"\xbd\xffl\xff\xef?\x1ct2\x88Wa\xbb\xbfky2L\x95\xf3\xf9?\xf6\x88\xc8G14\xb3\xbf=H\xa2\xf7\xf2\xb2\xfe?\x18\x05\xe6\xfa/\x11\x9c\xbf\xb0\xd5\xe1\xb5t0\xf9?\xba\x16\xec\xce\xb0\x8ea\xbf{\xff\xf8,$\x8c\xec?8\xcbIkm\xa2\xa0\xbf\xeaQ\x97\xe2L\xeb\xea?\x96\xb7AC\x16\x11\x9e?\xbc\xe3\xe6\xa3\xd5b\xed?\x16H\xd3\xed\xfa\xd4\xaf\xbf\xa4\xc0m\xf5\x00]\xef?r\xf5\xff\xac\xcf\xc6\xfd?k\xd1:\x13\x14)\xcf\xbf\xd5\xdd\xe3\xdfU<\x94\xbf#\xb0\x87\x1e|\xb6\xf1?<\x8e\xe2m\x00\x7f\xa4?\x87\xd4\x92\x10\xfb\\\xea?=xG\xd6\xf3t\xf6?\xa7\xba\xe3x\xdb$\xbe\xbf\x8av\xa0\x00t`\xa9?\xeb\xf4\xd4\x04\x8b;\xe8?h\xdc\x1eN\xff\x9a\xbd\xbf\xfe\x07\xf7&\xca\xff\xf5?W\x8f\x07\xf7\x12p\xa9?\xb3\xc2H\xe6Y\x04\xf6?\xa1\xc1\xacO\x992@?\x8c\xcbd\x04\xd7n\xee?+s\x0e\xb7\xad\xdd\xd0?\x12\xcb\xc3l\xd5\n\xf4?Pn\xf0\xf9\xe2:\xca\xbf\xf2\x9e\xa6\x17\xab\xf8\xec?\x02\'\x05\x8f\xcf*K?\x0e\xb53P\x99\xf2\xec?\x8c\x06u\xddq;\x9b\xbf\x0e\xf5\x05\xc6\x89\xf1\xed?\xdbJ\xdb\xb2\x80\xfa\xc5?r\xc0\xb3M@\xce\xed?w=aD\x9f\xe2\xa7\xbf\xf4G\x8cO\x1c\xca\xeb?a*\n\xad\x1e\xc7\xa7\xbf\x8c\x1d#\x1e\x84\xdb\xf2?\x82]U\xc0DB\xa8\xbf\x18M*\xeb\x92\x93\xec?,,\xf2\xf7\xea\xd7\xae?-\x1f\x0c\x9f\xea\xd9\xea?@[a\xef\xa1\xd0\xbb?\xfa\xe1\x7fF\xedN\xf4?\x0f\x8eVJj8\xbe\xbf\xc0\x1b\xa6\xd2,=\x01@\xc0\xec\x07\xfbKj\x98?\xc4!Q\xcb\x80\xed\xf4?8\x9c\xc5\x9a\x01\x94\x93\xbf\x14\xc5\xce\x04\xfd\x0b\xf1?(\xc6f\xfa\xfb\xd8y?\xdbz\xa3\x8d\x83\x05\xf2? ]\xe1\xb8\xb6\xb0\xc0\xbf\x89%\x98\xbe\xdev\xed?\xef\x8f\x8b\xbcq\x9eX?\x1f4\x8b}\xd2e\xf1?\x0fj\xe6\xc9\xbe\x8e\xb6?\xb8\xe2\xf7\xf0\x9ah\xec?y\x80+\x83\x8a\xcc\x98\xbf\xd3\x02\xe5\x8f\xfe\xdf\xeb?\xe9P\xc3\xc2\xd0\xb9\xcd\xbfL\x02\x1f\x1a\x91\xef\xfd?\xb0\x7f\xf1\xa9q0\xba\xbf\x85\xef\x1c\xadr5\xf2?\xd6s\xf3\x9egL\x9f?\xfd\x12\x18\xf9\xfc\x80\xeb?B\xd1\xbdR\xe3\x08\xab?\xc7\x0c O\x8cY\xf3?\x8a\xd1\xd5\xa7\x1d\x00\xb3?\x1b\xb6$\xb9Q\x87\xf0?r07\x93\r<\xbd?\xbd\xaf\xfe\x02\xe7\x0e\xee?\xc6\xcc\x19\x91\x83\xcc\xb3?xy\xd9\xaa\x0b\x96\xe1?I\xee\x9a\xc8R&\xa5?\xb87\xf1\x87\xd2\x81\xed?\xcf\xb8/\x1b]\x1d\x8e?7\x14\xe2\xadi\x1c\xf1?*fU\x0fm\x11\xba?]\x05\xc2;e%\xeb?jTJe{\xf8\xb4\xbf\xe3~\xc3G\xbd\x89\xe9?\xd8\xe7\x92\xd5a\xed\xa1?\n\xa7_\xd3\xf3\xdc\xf1? \xb4\xcb\x17\xc5\x0e\x9d?\x05\xf6a)\xd6\xc6\xf0?~\xf31\xfb\x08\x02@\xbf,\x0c}\xecZ\xe3\xde?O\xc8\x17\xfc\xa1\xb7\xa9\xbfb\xe7\xf00\xf3w\xf2?\\#\xd6U\xeb\xee\x99?f\x10\xdf\x8b\xb2\xe9\xea?\x85!\xc5\xbf\xcf\xb7\xcd?\xd0\x91\xc6\xab\x9a\xec\xe7?\x0f\xe9z\x0f\x0f\xbf\xa5?\x8d\xfe\xc2`\xeb\x8a\xe6?\x9c4\xd0\xd2\xcd\x16\x8b\xbfj\xbes\x14\xca\xe8\xf4?|\xf2\xca(\x1e\xb1\xab?\xd8\xb5\xe4]\x07\xe1\xf2?k\x1e&Z\xea\xcdn?\x8b\xe0\xf9\xd3n\x9e\xec?d^\x87\x0c\xf7t\xc8\xbfY\x1et`\x99x\xf8?*BV\x9d\xdb\xdc\xa5?\xac{k\x90\xfcf\xef?iJ\xcbo\x83)\x7f\xbf\x9f\xe4\xae\x9d\x97\xe3\xf1?\x19\'\xdc+\xce\x9a\x92?\xc2\xee\xdf\xca4\x83\xf3?r\x89W\x9a\xf2\x7f\xac?\x95B\xa5\x98v\x8f\xe1?h\xd2\xe5\xcb\xec\xbb\x9b\xbf\xc7\xf0\x82\xf9\xae\x1b\xed?^g\x84T\xae_\x93\xbfsB\x9b\x868\xc6\xeb?\x17d\x12\x1dB\x05\x90\xbf\xaf\xdc6L\x1a\xa8\xf5?\xcc\xa1\x0e\xb8\xad\xb2\xa2\xbf\'\x9c\xae\x0e\x01\x9b\xf2?\xa3\xd5(QlB\x9d\xbf\x02\x8cK\xa7\xdd+\xe8?\x15\xb5,\x8c\xae\x81\x9e?\x91\xc1\t\xdb%b\xf0?\xf0\x80\r\xc0\xa8\x03\xbb\xbfq\xd7\xc8\x1b\x83\x0c\x00@\xd4\xfd\xed\xc6\x865\xa5?\x16\xda6\xb8V\x06\xed?9]\x01\xa9&\xd9\xa8?\xb7+\xad?1\xaf\xe8?\xea\xbcC\xf63\xbc\xa5?\xdc\xb5\x07e\xebY\xeb?3_\tV\xd7\xf1\xbb?\x84\x85\x95\x80\xfc\x00\xe9?`\xe0\xa3=\xda_\xc1\xbf4\x0c\xda:x\xfc\xf7?m\x05o\xe13\xbb\x98?\xcc\x9d\x7f\xd0\xd7\xc0\xf6?\xfft\x05\xd3\x84\xb2\xa8?D\xd0!\xae#\x10\xea?\x8c\xfe[\x91h\xe1\xa9\xbf\xc3\xe2\xb8#}\r\xf4?\x0c\xfbb\x8cz\xb7\xad?\x07[b\xdc1\xa5\xf1?Du\x99T\x8a"\xa1\xbf\xef\xe5\xfe\x12\xff\xf4\xec?\xeb\x9d\x83\xb4\xb6\xbc\x94\xbfKi\x15\xe8d\xf1\xee?\xa0\x85\xff\x90\xf6\x9f\xb3?(\xa4\x01O-I\xec?\xae$N2\x7f\xca\xd2?\x91\xe4\xe5\xa7*\x12\xe0?\xb1\x7f\xf6J\xaec\xa1?\xb4\x98\xf8\x91u]\xe7?\xf8\x1c\x878\x1a\x84\xa4\xbf\xe2o\xe9\xbd=\xb3\xf2?\xc5\x84c\xa7%\xb3\xb0?\xc7r-\x08\xcb\x97\xeb?K\x92\xact\xa6\xe1\xb0\xbf\xb9\x85\xf4?G\xac\xe8?\x00>\xe9\x07!\xcd\xcd?\x8d<\xe5L[\xab\xb7?\xf1\x90\xb5t\xcf\xb7\xb9\xbf <U\xd45\x9d\xf0?\xa0\xe8\xf4\xff*\xa8\xbe?P\xff\x05\xb5\x00+\xf1?i(\x0e\xb8\xcf\xa8\xa9?\xb9h1\x0c(#\xf1?\xa7\xfa ~\xee\x1a\xae?\x12\xaf\x05\xd6\x97r\xe4?\xcf\x01\xe1\x01\xe1\xe0\xb2\xbf\x01\x80N\xd7r\x02\xf1?jM\xcc\xf9\x83\xaf\x87\xbf \xca=\x934\x8c\xf2?\x10\x165\xa9\xb6s\xd0\xbfo\xd4\x88|S\x17\x02@\x80\xea\x88\xd4\x12"\xb1?\xdbM\x7fd\xb1\xf6\xf8?\xfc\x89x\xbd\x8b\x0b\x9f?\x88\x83\xe4\xddj\xc1\xe8?/M!s\xf2\x10\xc4?\x97\xc3R\x84\xb4\xbb\xe6?{\xeb\xdf\xee\xd0\xa6\xd1?\x9e>\xf19\xcf%\xdb?\xa8\x0b\xff\xe2!6\xc0?\x1f^\x81\x1a\xa2\x05\xc0?YF=\x0c\xab\xd9\xb1\xbf\xd8*\xc5\x13\xba\n\xf3?G\xedg"u\x1c\xb6?&\x04"\x99t$\xe1?_\x96$\xa4\xc3\xd1\xa4\xbf\xd33uB1S\xf0?\xe8\x9aA,!L\xb3?~B\x15q\xd2\xe2\xed?\x13\xa3\x87 \xcb\xb2\xa4?\xf5\x9d\xfa"9\xa1\xee?\x96~}<{\xd2\xab\xbf%txX\xd6?\xf3?1\xe6fa\xbd\n\xb1?z\xf9|8X)\xdf?\xe4\x91\xb4 I_\x83?3\xfa;\xbd\x81\x94\xef?n\x12\xbc\xa0%@o?\x1cPe\x8af-\xf4?Y\x14I\xc0Y>\xb5?\xf9!\x15o:\xd9\xe8?\xcf\x8d\xc2\xb9K\x93\xb0?\xe4qj<\xddj\xf9?`\xe2\xf4\xfbbE\xa6\xbf\xd5\xf7\xabD\x14\x13\xf5?\xb4\x84P(\xef\xe8\xb3\xbf\xaa\xf7\xa0\xfc\xf6\xf7\xf4?\xf0\x94\x1fL\xdfM\xaf?\xff\x0c\xe3\xd9~\xe2\xed?6\x9dW\x7fP\xec\xbe\xbfT\x95\xa9H\x9e\xb0\xf0?%j\xc8F\x06\xa8\xa6\xbfp\xadXD=|\xf5?\xb5XPF"\x13\xa3?\x01\xb5U\x02\xbf\x86\xf2?\xde3t\x82\x98\xc8\xa4\xbfa\xdf2\x81\xf3\xa4\xfa?\x88\xb5{<r\xa9\xa4?j\x9f\xa8\x14\xfe\xf8\xf0?\x13\xc0f\xdeT\x87\xd1\xbf\xf8=J\xb0K\'\xfd?K)\x1a\xd2\x85|\xb2\xbf\xd4Y\xe4i\xac\xcd\xe6?N\xd5\xb6\xc3\x95L\xc5\xbf\x9d\xce@\x0eh\\\x01@\xd1\x04\xc9\x88v\x9f\x89\xbf\x8f\xf1\x0e\xe8N\xdd\xf1?F\x98\x14\xac\xf6U\xa7\xbf\xb5z\xd6\xfcY$\xf2?05\x8b\xb8\xadS\xf3?\xc0\xc5\x0c\xbc\xa6Z\xb3\xbf\xee\x9fwA\x0cK\xac\xbf\xab\xd7t\x8csM\xef?\x00\xae\xf9\xe13A\xc2?\x0c\x99uT\x1b\xbf\xfe?\xb8.=\xb8\x14\xa1\x8e?L\xaa\x9fYw$\xf1?I\x01\xabs/L\x96?\xf3\xc5\x10RP)\xf0?\x9d\\\xb2\x98:\x03\x94?C\xe1\xf7F\xf6\xad\xf1?\x9f5\xca\xea\x9c\xb7\xb1\xbfP>\xd0VF\xaa\xef?IX\x08\xc0\xadb\x83?lHS\xac\x05\x9c\xef?\xf2\xf7\xd8\xfa^\xb8\xa2\xbf\x9eP\x13Cew\xf1?\xd1\x16\xca6N\xaa\xae\xbf^\xd91[\x98f\xf7?\xdb\xf8\x90\xd0=\xaa\x96?w\x0f\xfc<I\xc1\xed?\x1e\xab\xacg\x9d\xfe\xd8\xbfY\xf59\xee\xa7;\x03@5\x0c\x9a,\xb9H\xcb\xbf49\xa3\xc6\xe6\xd4\xfe?.\xf8+\x80\xfa\xdb\xbe\xbfCi1[\x0cX\xf4?ovQ\xa5\xa3P\x8a\xbfBg\x95}\xcf\x06\xf1?C\xb1\xb4\xcc?s\xdb\xbf\x01)\xa0\x9b\x0c\x8f\x03@\xd1\x93\x93\xf2\xa1\xc7\x90?)\xc0;\xcfv\xfe\xeb?\xdb\xad^*\xd9\xcb\xd1\xbfB\x12\x9c\xb1w\x11\n@\x02,\xab{\xdfL}\xbf\xbf`\xd1\x8ac\xda\xf1?\x95Y\xc0\xb2P\xe6\x98\xbf\x1f\xcc\x1c\xd45\t\xee?\xdc\xb2\xc2\xfdzfr?\x0e\xd97\xc7.\xbb\xf1?>]\xfd\x82\xfa\xda\xc2?CYS\x9bA\x1e\xf3?G\xe3C\xf3\x12\xd7\xda?\xd6\xd5nN\xe3\x13\xf1?Qy\xe7\xb8\x04F\xc4\xbfd\x8c\xc5\x18\xe7\xc1\xfe?\x07\xa7Hc\xd3H\xbd?qa\x19\x0eO\xd5\xf0?\x07\x9b\xe0\xa8\xaf1\xd8?\xf1\xd6-\xcb\xf6\xdb\xea?\x11\x88\xac\xd8\xea\x85\xc0\xbfb\x91&p\x14\xa6\xee?Z\xba\x8c(\x12\xc3\xaa\xbf\xec\x97<\x03\xbf*\xf7?\xbdA\xdau\xf4x\xb1\xbf\xa4\x0b\xed\x17\x9c?\xea?\xb5\xd3\xcd\xb9\xf2\x93\xa8?\xb4\x95\x95\x9b\x9dZ\xe6?\xe3\x9b\x8b\xe2;Q\xa5\xbf\x9fE\xcf.\xb4f\xee?H\xa5\xe9\xf9\xde\xac\x87?&\xee+N{\xf1\xfe?\x97#\x83}\x84w\xa1\xbf\xe7\x88#R#Y\xf2?\xe7\x1fi\x8eY\xeb\x96\xbf \n\xd6\x86=!\xf5?x\xc3\xab\x88\xa4&\xac?\xb6KA[\xf5\xed\xf0?\x99\xe9XK\x9a<\xc5\xbf\xbe\x83\x1aC\x90[\xf6?AD\xe3\xa7\xab\\\xb1\xbf[\x97@\xf9[4\xe7?\xd2O2\xbbK\x85\x96?\xb6W&\xad\x8fD\xee?\xe0\x8f>E\x9d\x94\xb6\xbf\x18\x1c>4w[\xf1?Q`\xc4\xb4\x11\xe0\xca?G\xe9\xc8*\x1a\xcd\xe4?k\xe0S\'N\xe5c?HD\x07\x8e\x066\xee?\xe7\xcf^\x82\xbc\xa2\xbc\xbf\xa2\xd5O\xca\x99^\xe4?'
p69
tp70
bag2
(g3
(I0
tp71
g5
tp72
Rp73
(I1
(I2
I357
tp74
g12
I01
S'\x82\x1b\x9f\xac>\xf0\x86\xbf:\x9a\x1b\x8d\xf8\xc2\xeb?\xe1\xdc\xb2\xc1\xd1y\xa0?_\x85\xa1X\xbf\x97\xf0?\x7f\xa2\xb14\xebB\x8c\xbf\xbck\xcdC\xeb6\xf1?\x92f\xfd$\x11\x17\x92\xbf\x9b\x17e\n\x14\xcf\xf2?\xd0pCf1:z\xbf:\x00\x1d4\xf0\xec\xee?\xfb\xe3G:S\xed\xa9?9_M\x86\x9e\xff\xea?KN[2!\xf2\xba\xbf\xa0\x94b\xc4\xf2X\xee?\xbe\xa88?\xc6\xf7\xb6\xbf\xc4\x8c\x8e\xb5\xf9\x99\xe8?(\x1bw\xb4\xd7\x05\x8a?\x82\x8cO\x81L\xf2\xea?\x9a\xad\x8f\x13\xbd\xa2\x9a\xbf|C}\xa4\xa0\xec\xf2?V\x1c\x81\x8e\xa3\x9f\xd1\xbfE>A\x7f(\xf8\x05@\xdb4t;\xba\x12\xcb?z\x84 P\xfel\xf2?b\xe4\xd4|\xf5\xbd\x97?\xd0\xdb\x9b\x16\xe8a\xf2?N\xc3V\xc8\xa5;\xc4\xbf@\xf80\x9f\x80\xf0\xf7?\xd9\xa0\xd8\x83N\x94\xb2\xbf\x8f\x10\xdb\xdd\x9fb\xf1?\xf4BY\xc0w\xaeg?\x8e\xefVX\x8c\xb6\xf0?\xbc$\xbd\xb8K\xa2\xa7?\xf7Yt\xb1\xa5\xd6\xf0?<\xa9,\x05\x1e\x17\x97\xbf\x0c\x9d\xd2\xf2\x13\xd6\xf0?\xf0\tv\xe0\x9a\xcb\x9f?@\x8f-\xc7\xa5\xf9\xf2?WH\x81+\x1aR\xca\xbfZ\xbb\x89\x19[\xf3\xfc?;&\xa9\x9c\xf4\x9c\xbd?\x8c\xd4[\xa2\xb2|\xf1?\xf0\x00\x93\x1c\xebM\xb5?\xc2p\xd8\xedP\x00\xe5?\n\xb9C\xa0\x94\x88\x9d\xbfE\x16Xe\xeb\x84\xf1?\x1fi\xc7/<p\xc4\xbf\xcd4\xc0X\xf4/\xf9?\xf6\x83\xaf/Y\xe8\xaf\xbf.meL\xb9\xd5\xf2?\xfc\x12\xf00\xe8g\xcd?\x08\xcf\x1c\xeaI\xbd\xf1?\xac\xb0\xf5\xa7\xafm\xa7?_\x8a\xb2\x90\xf1\xb2\xea?\x12I\xa1$t\x8c\xa6\xbft\xde\xf0\xc8\xae\xfc\xdf?\x023\xbf\',\xfa\xb9?[\xd4\x10\x83\xd8\x93\x07@\x03\x1b\x82\xb8\xafD\xb7\xbfu\n\xb9\x8e4\x80\xf3?\xe8\x1f|[\x84\xf6\xa5?\x80+\xe37<\xb0\xed?t\x93\xd5\'\x96\x9e\xd6? \xdd}H\x1a\x8c\xed?\xcf\x9d\x05A\xce{\x98\xbf-#\x07[%\xb0\xf6?fHdsI\x95\xb2?\x8b.\xe7\xa3mz\xed?\x7f\xb0r\n\x8dy\xcb\xbf\x1d\xf1\xc6\xeb\x17\x9b\xff?\xe8\xc3+\xbd\xf2!\xc0?\xef\x83\x16\xeab\xfb\xec?5\xe1\xab\\]\xba\xbe\xbf\x81\xda\x0f\x9bQ\xeb\xe6?Y\xfd{\xb8}c\xa6\xbf\x1cL\xa8\x1f[\x10\xef?cj\xae>\x078\xb5?T\xb2X\xe3\xa0\xf1\xe7?|\xd8\xc5\xb8\x18\xed\xa2?p\xcd\xb0\xc0\xe0.\xf0?\xe7\x16\x02A,Ey\xbf\x1b\xe7\xfc\x82\xb4\x92\xec?\xc2xS\xde\x83\xe6\xbf?\xca4\xaeT\xbb\xa1\xfa?o\xd5s\xe2\x0e\x85z?T\xc7~<\x19U\xed?l!\xebO\x0c\x01\x85?"\x94,\xee\x96\x8e\xed?\xf6\x8f\xe0\xd3\x8dOJ?\xef\x1eF|%H\xf0?\x9e\xa2&\xfbE\x15\xb5\xbf\x9c\xf5\xf8\xd9\x90\r\xe9?=.X\xa4\xbcZ\xb6?M^\xd0\x89\x80&\xf0?\x81\x9cY\xc5K\xa2\x92?\xb3C4\xf09P\xe4?\x1bA\xf3qB\xfa\x9b?\x15\xd2\n\xbf\xc2\xab\xf1?O\xab\x85CV\xfa\xa2?\xd0\x8c\xf7\x86\x8a[\xea?\xb5\x11\t\x17\xcbB\x87?\xc2\xcdX\xa5\x0f\xb3\xed?c\x9d\xe8\x15>\x80\x92?t\xa6\xd0\xeb\x88q\xe8?\xe6\xda98\xfb\x0b\xa8?(\x84m\xa4.:\xe1?\xdb?\x8c~D\x16\xbf?\xcf~\x8c\x97W1\xf0?\xdb\x9e\xed\xec5\x05\x91\xbfLB\xdc\x8aC\x93\xf3?A`\x9e`\xc3\xa5\xba?\xf5\'\xcf+\xc8\xbc\xe7?\xd5\xcd42\x97\xe4\xbe?,\xb9\x88\x1f_r\xea?\x95\xff\x98\xa1,l\x91?\x8bp\xb5\x14\xf7\xb8\xef?\xf2\xa0\x93*w0R?#\xa8x\x14A!\xea?h\xcc\xfd\\\x15w\xc6\xbfai\x87\x15\xe9-\xf3?\x99\x03\x82\xa3vv\xb3\xbfN\xce\x88\xbau\xf9\xf0?\xeeiz\xbd\xb5\xd0\x94\xbf\xb5\xdc\x7fL\n\xd3\xf4?\xa3\xe9d\xa5\xbc\xe9\xb9\xbf\x7f\xaa\xb6\xb9\x13=\xf0?\xd7I\xd43u4\xc9\xbf\xdd"\xd5N\xe8\xf8\xf8?\x19\xb84AF\xba\xc4\xbf\xf2\xb2\xb04\xa4\xb2\x00@\xc8\n\xbd\x82M\x0b\xa0?+\xbfcn.%\xe9?\xc6\xb2\xd8T\x9f{\xba?<tM\x8b\xbac\xf4?W\x8e6\xaa\x80>\xa4\xbf\xf0\x1a9\xf53P\xf5?\xc4\xe4\x02w\xe8|\x81?\xb1\xe0\x83A\xe96\xef?\x8dI\xbd\xeaS\x98\xa1\xbf\x83O\x12\x1c\xba\xe8\xf1?\xd7\xb0\xe2Kr\xad\x87\xbfr\x9bY\xb1\xacX\xef?s\xf3\x19k\xe0\xc5\x88\xbf\x13hfV\xfc\xd7\xf2?Q\xb0\x80F4\x17\xed\xbf\x03\x97$\xc6v\xd9\x13@\xad\x11\xac\x03\\0\xb3?\xf6\xe0\xfb\xd5\x96`\xec?v.#B>\x9b\xb1?G\xd7\xfd\x0c\\h\xf4?\x9dyC\x83\x8fW\x8b?\xd0\x98\x93m\x17\xb1\xed?\xb3\xca\x9b\x0e3I\x9a?\xf3#\xb6\x83\xe6I\xf4?;Jm\xa4\x8c\xf9\xa1\xbf\xf3\xe0@qZ\xc1\xe7?\xeds\x9e\xf6\xcf\xe8w?C\xd9\xa8\xfd\xdc\x07\xf2?\xbbH8\xbe\x94\xcd\xc3?\x9f\xf8\xc0w\xb3\xb2\xda?\xfa{\xbe@\x18)\xa5?\x17D!o<R\xe8?\xe4\xd8\x12~\xb8-\x9b?\xbd\x19"\xc1\xcf\xd2\xf0?\xc9q$\x9b\x80\x92\xa7\xbf\xe7i\xc7\x8f\xa0\x19\xed?\x1cV\x10S\xf18\xc7?\x8c\xba\xe0\xf0ku\xe6?8D\xe1\xbf\x07\xfd\x92?\xf9\xd4\xa8\x81jw\xf2?\x98\xd4\x9e{\xc4\xf1\xb1\xbf:\x1e\xe4\xd9km\xf6?\xc4\xbbJ\xfa\x8a/\xac?\xc2W\x9eXy\xdb\xe6?\x0c\x98\xd7\x1d\x99\xa3\xc2?(L\xf2a:>\xf4?o\x19]\n\xd4\x1c\xec?\xb3\x8b\xc4,!\xab\xfa?\xc61\xb46a\xca\x9d?\xd6\x8a\x9c\xeb\x15B\xed?1\x1di=\xdb\x14\xd2?\x82\xb8\xe8O\xae(\xe4?\x11E\xc9\x0b}q\xe9\xbf\x1e\xa6\x80\xcd\xaa\xd3\x10@\xdf\xa7\'\x91\xb7\xaa\xb3\xbf\xd0\x97;\xe2\xc9\x93\xf2?\xd3\x97\xa2\xe5\xc8\xc0\x9d?t5\x13\x82\x95\xe9\xf0?\x8c\xf6\x1c,\xefH\xbb\xbfg\xc1\xe5\xb6\xd5\xa9\xea?\xc8\xe1\xf9[]\xcb\x9b?\x83W\x9e\x8b\xfcu\xf3?q5\xb8+X\x1b\xc2?\x0b\xad\x1bv\xf8\xe9\xf1?\x1a4|\xdb\t\x00\xc3\xbf\x82\xb6\x1a\xb6\xf0\xa9\xf5?\xd9\'\xc6@\xab\xd7\x99?\x1e\xbe{\xabm5\xee?\xccQ\xac\xf4\x1f\x90\xbc?\xb2d\x9eD\xbb\x14\xe6?\x87M\xc4Id7\xd1?\x9c.\x1c\x80J9\xee?6\x1a\x05>\xdd>\xb6\xbf\xc4\x0e\x03\x01\n\x17\xf1?\xcdd@!Q\x02\xa5?\xb4\xe3\xc9\xb7\xe4v\xf0?\xfe\xd3\x00+1[\xa0?\xf6\x00w\x0e:\xe1\xf0?w_v\xea\xaa\x08g\xbf\xe0\xf0\xa3\x1b,d\xee?\x1cn\xe3\x92{\xb4\xd5?\x8f\x0f\xa51[\x86\xf2?M\xad\xee\xc00T\xa9\xbf\r\x19\xf2\xa57\xa0\xe6?\xdc\xe7D\x8f\xc5gS?\x10?}\x06\xfbY\xf3?x\xe3w8\x9d\x84a?\x14\xc8U0\xc4x\xf0?\x90\xa6\x04?\x05\xc00?\xf8\x96\x9995v\xf0?Gce4\xa3\xdf\xbf?\x15\xfa\x00-\xac\x1e\xed?\xb9]\xb5\x94\x92=\xb1\xbf\xa7T\xc0\xa6\x19;\xf0?\xdf\xfdb\xcfx~\xbe?\xef\xe4,\xd4\xa9+\xe8?\x1bD\x07\xfe\xd1\xfe\xbd?\'\xa9\x05\xd1w\xcb\xea?\xd82\xad\x17\t{\xa0?\x80\xf9\x86:\x9b|\xea?\x7f%\xd8\x9a\xca`\xa9?\x93\xe2\xb6~p\x9d\xe1?P\xe3\xbc$c\xbf\xb6?j\x83u=a\xc9\xf0?5j)Z,t\xdb\xbf\xbf\xac\t\xf0\xc5y\x05@\x11\xa1}\xd4\x8b\xb4\xa3?\xe1\x88\xbe\xcd\x9b\xad\xf0?\x06*\x80\x94\xc9\xbc\x9c\xbfl\x08\x8e\xde\xaa\xe3\xef?z\xd7\x80\xc5?\xe1\xc0\xbf\x9f\xaf<\xc9\x1a\x97\xf1?{\xfa\xe5\x0e3\xdd\xc5?BA\x1a\xbeP\xe1\xf2?\xf3\x02mT\x07\xdc\x83?U\xe3\x92e=\x08\xf3?\xc2^E\x8a\x0c\xd0d\xbf8\xf7-6u\xf5\xeb?r\xa7\xe2\xcf\x1b&\xb5?A36\x97\x8b\x1b\xff?w\xc0\xb0\x0cK\xe8\xc0?\xf6!r\x04\xbf+\xe6?\x81-a:4\x13M\xbf2\x9ac\x8e\xd8\x89\xf0?;B$\xb4\x1a\xabs?DcJ\xb8\xbeQ\xe0?,\xafE\xea\x1bs\xbd\xbfv\xb2m\\\xe4r\xf5?$\xc4\xd9"\x03\xc3\xa6\xbf\x8c6R\x91\x12#\xf0?\xde\xa5\xa7\xbf\x88\xd5\xa0?t\x7fE=2\xf4\xea?\xd7\xc0\x97\xc9\xd4<\xab\xbf$\xa8&\xfe\x1b\xb2\xf3?\xbfG\xe3\xc3\xc9{\x9e? -\xecZ\x16=\xd5?\x8cp\xf7bca\x9d?\x0e\x8d\xafbq|\xf7?\xa0\xc6\xf6\xdb\xd3\x04\xbd\xbf3\x13\xd9\x8b\x0fg\xf2?\xea\x00:\x10g\xc3\xc2?\x97\x15BVys\xe3?\xcd\x8e\xb1\x13}\xc2\x91?\xdf\x03\xa3fW\x8d\xee?\xcch\xba\xf1s~\xab?\xe4i\xcf[\x04\xf1\xea?*\xe5\xfe\xf3\x08\xce\xb0\xbfC|\xa2\nz6\xf6?\xe8\xcaa\xeb\xbf\xf6\xc3?\xaa\x11\x8c\xef\xdf\xd5\xe7?\xf4\x84m\xf3\xd6\xb7\xd7?\x0c\x9ba\'\xb9\x90\xf3?\x93F\xd8\xb9B\xd0\xa7\xbf\x15\x84\xad\x0f\xab3\xf5?O\xf5\xa5\xe8\xef\xd2m\xbf}\x90\x1d\xdc=.\xf1?\xc8K\xdb\\c\xf1\xb0\xbf\x1b\x89ylu\xe5\xf2?\'\xb8-\xd1LA\xbd\xbf\xdaj\xb5\x14\x80\x81\xfc?r\xaf`B\xe1\x18r?dJ\xfdl\x06\x01\xfd?J1]\x9e\x97\xb6\x8b\xbf\xaa\xad\x0f\xdeU\xf1\xf7?\xab\x11\x9b[3\x02z\xbf=\x99\xad/\x9c\xee\xea?h\xe27\x14F\x0e\xbd\xbf|\xa4`\x11~\xfe\xf3?p\x9fg\x847\t\x8a?\x92\xe3\x13\x02\x83\x80\xec?WPps\xc9i\xad?\x89\xef\xf6\xbcb\xba\xeb?\x02\xfc\x017\x16\xda\xd2?\x89\x13\xce\x11\xf5\x94\xea?U\xe5\x9a\x1a\x8e\x8a\xa9?\xb0\x1c\xcaY\x9c\xea\xe8?;!\xf7\xd4\x18\xd6\xd3?\x01\x87=\xd21m\xf0?"\xf6\xf5s`\xd6\xb2?Q\xa4\xea\xefSM\xe8?=m\x1e\xa9\x01\xe4v?\xf9a\xc8\x1eXz\xea?\x15\xb1\xcc\xa8TQw?\xdb\x02\xb3\'\x88\x0f\xe0?\xfa[\xc6\x80\xea\x9d\x89\xbf\xfd\xc0CW:/\xef?\x9a\xaa\xdcf\x12\x9a\xf1?[\xc1\x94R\x01f\xf6?\x04Z\x9a\xeet\xf3\xa8\xbf3J\x13\xb4\xbfC\xf3?\x87I\x01\x1c\xad\x1d\x98?mp\xd7#|\x8a\xee?9X\xe1\t\xea\xb0\xb4?d\xfc\xff\x18\xdc\xc7\xe9?B\x04\x941!\x07\xc8?\xa64,c\xaeV\xd9?\x88\x1ayb\x82\xf1\xc7\xbf\xfb\xfc\xcfp\x91\xea\xf5?X\xad\x18\xdc\xe4@\x8d?\xd8\n\xcf\xe5\x00\xbf\xf2?Y\r\x07b\x17\xda\xb5\xbf\xbcv\xbeV\x06\xb7\xf0?o\xbc\x89\xb5\xcf;h?\xcc\xa9E\x81\x84\xfa\xf0?\x89\xb5\xbf\xfe\x85\x97\xa3\xbf\x05\xc0N\xe2\xe0\xa9\xf1?\xc3\xbb\xcf\x18s\x14o?\xb9\x00B\x13\x95\xbc\xf1?=\xc1\xe4\xd9\xb2\xf5\x8e\xbf\x04\xde\xb8l\x8f\x17\xef?^\xd2\xc6\n\xa0 \x86?\xab\xe3\x98\x9d\xee\xf3\xea?\\\x88\xdcI\xfe\xed\xb5?\xd2\xca\xf9\xe0h\xd5\xf2?\x8b\xb9\xfckp\xd5\x89\xbfNdPC\x8a\x96\xe5?\xdei6\xd1\xac\xa8\x85?\'\x01\xc2L\xe1\x9e\xef?\xb5C\x06O\xe9J\xd5?1\xe6\x94\xd1\xff\x00\xed?p\xc5\xce*\xfby\xae?\xb3\xaf\x86\x95\x18\x0f\xe9?_\xbb\x19\x81ZB\x91\xbf}\xef\x17\x08\x9e!\xf0?\x9eZ%\x010\xf6\xae?\xfexd\x17\x9f\x98\xec?\x94p\x18O\xa7\xa1\xb5?$\x8d=\xb4\xa8\xa6\xf3?N\xda\x1e\x15#\xc6\x9e?Zf\xbc\xcd[\x8a\xef?\x88\x13\xb6\x13?\xda\xef\xbf\xd1\xf8<Z\xdc:\x11@\xdau|\xfb\x06\t\xbe?\xb2\xfd\xbb\x85\x82\\\xe2?\xd2e\x80M\xb2_\xc0?\x97&\x12F"\xd2\xdb?\x93k\xe1\xe0\x1fY\xc1?\xa3$\xac5\xaf\xe8\xe4?\xf2\x85\x00:S*\x84\xbfs\xc8{#Fh\xbc?]D\xc0] \xed\xc1?\xbbt\x03\xe4F \xeb?"\x9by\xec\xb2\xb7\xba?\x86Q\x84\x84\xf4\x84\xfd?\xcae\xdd5\xdb\x06\xa4\xbfP\xcd\xef\x87\xe3\x9f\xf2?Wpz\xec\x1c\xc6\xcd\xbf\xdc\x8b\x06\xcb\x12\xb7\xfc?\x17\xb5\xa6\xa6\xf6\xf5\x82\xbf=\xab\xac\x9d\xf6\xee\xee?"\xc2\x18\xf6\xea\x87\xbf\xbf#[\x7f\x19\x92#\xf5?8\x1bK\x88\x19\xee\xe6\xbf\xe0Qz\xe6\xeb\xfe\x10@\xb9Q\xe9S\x01\x8c\xa6?\xd2\x81G}\xb7.\xf1?\xbb\xd5\xa9\xc1\x15s\x96?\x95\xc7\x89y9\xcc\xd2?\xba\x0b\xee\xe6\xbd\x89\xc8\xbf\x11\x1cX\x83^T\x03@g\xd2\x98d\x10\x18\xb3?\xcd*W\x17\xb8\xa2\xe5?|\r\x9f\x12v\x85\xb4?\x87\xf7\x88\xc9D\xd7\xed?\xc6|z\xbb\xd0\x01\x9f?\xc4\x95t\xdd\xd8\xe0\xf0?\x07AE\x915X\xd4?\xc5\xedU\xbf\xa5\x1d\xfb?\x1c\xe9\xcb\x98\x88\x8f\xab?\xbeV\xabX\xfd\xa5\xef?\xc8\x0eM\xa0\x88\xd1\xb2?V\xc6>l9\xf1\xf1? 0!6\xb9\x81}?\xd2G\xfdL\x1d\xe8\xf0?\xfe\x0fs\x1f\xa7z\x82\xbf\xc5\xdcW\xd2\xf8x\xf2?\xa8\x106\xa6t7\xa2?{C\x94"\xf2\xab\xec?\xd6\x13\x9c\x95\xe9\x86\x8b\xbfR\x13\xafH\x02G\xe7?~H\xc4f\x8f,B\xbfGt\xd7\x90\x8e[\xf1?\x13\xea\xac\x9c\x88m\x8e\xbf\xf3\xccn\x8fY\x17\xed?P\x90\xf0\xda\xfb\xee\xa4?p\x1f\x92\x9d\'I\xeb?\x1a\x08\x99\x8cDV\xbc?\x7f\xfb\x04\x06\x1dN\xf7?\x83|5\x1f\xac\x1f\xd6\xbf\xb7\n\xd0\xe5H\xef\xfe?\xbaY\xce\'\xad5\xa4\xbf\x1f\x08"\xc1\x7f"\xf2?\xcf\xc5%\xc3\xc7\x1b\xdd\xbfp\xba\x80\xac\x8d\xb1\x07@\xe8\n\x16O\xf4\x8d\xb4\xbf\x89\xa3]\xb6\'b\xf2?nV\x18\xe3!\x1f\xb1\xbf~B\xd5\xcc\xbao\x06@\xf1\xb0\xae&\xc4\x9a\xc0\xbf};\xfb\xf8\x812\xf2?D\xd4\xd0\xee\xa9\x80t?\xbdNo\xb6\xf5\x1c\xf1?\xb6"\xb5:\xee\x1e\x91\xbf\x01|\\.\xf6$\xe9?\x8a\xd0\xbb\xefl\xcb\xcb?\xe4`cH\xc9\xed\xf0?\x00\xcel9z0\xab?\xaeHhO\xbd\xeb\xeb?\xb4\x8a\x16\x00~\xdbW\xbfo)\x16Q#\xdf\xeb?\x92>r\xdb\xf0\xc4\x92?\x81\xffa+\xe4\x89\xf2?X\xe3\xaf\x9c\xe5p\xb4\xbf\x08o\x18\x1e\x97\xed\xeb?\xc4\xbb#\xf3\xf1\xa0\x9e?ju\xeb n\xf9\xef?\xf8\xf1-\xbc\x0f\xfb\xac?E\xb2\xf5*{C\xe2?*W\x14\x03\xe7\xcb\x9f\xbf\xdf]\xdd\xbbg-\xec?\x84G\xab\xa2\xb6\x9a\xcd?\x92\xe0\xef\xb8qj\xf4?\x18\xcf\xffO\x1aQ\xba\xbf\x84\x94A6ih\xeb?1\x04\xd7\\g\x19\x82\xbfbO\xb0L\xab\xce\xe8?\xde\xca\x8e\xa3\xd0W\xae?ij\x91\xcc\xa2=\xf7?\xc4X\x9f\xe4\xd9\xed\xc6?a\xb5Cm\xff\x8c\xf4?e\x04\xb4\xdd\xfb\xd4\xa2\xbfAI&K!\xf5\xe2?\xbb\xc6\xc0$!\xe3\xb4?R$\xa7%2\xd2\xed?\x05\xea\xf1\xcd14\xdf?\xf0\\\x0b\xa0\xce@\xe8?\xbe&w\xe8\x8fX\xa9?<\xa3\x1dt\xaa\xe7\xf0?\x8a\xd9\x92"S\x9e\xa7?\x11\x82\xcb\xcc\xe6\x02\xf8?\xe3\xa8r^\xd8.\xa5\xbf^\x19\xf3^}\xe7\xec?\x10\xa4\x1fq\xe0\x9e\x96?\x1by\xe7\xff\xdb\x9c\xf5?j8\xdd\xbe\x95\xdc\xd1?\xa0\x1bV\xb4\xd6V\xf0?\x9d\xed}z\xee\xaa\xa2?#\x9f\xcb\xe3a\xa3\xe8?\xef\x07@\xa0|\xf6\xb6?d4\xdf\xf20<\xe0?*OOv\xdc\x01\xd5?k\x9f|\xa7\xff\\\xf0?\xfe\xca\x8d\x99\xb6*\xc8?\xde\x02 W.\x17\xf3?\x0cE\xc7w\xf0r\xc5\xbf\xec\x90O\nP\xdf\xef?\x16\xe2c\x11\x99\xb2\x98\xbf\xc2\\\xfa\xc4:7\xf3?^\x880\xe5\xce\xc4\xae\xbf\x8adE\xb9q\x87\xf3?-c\xd8\x9d\xb9\x92\xa2\xbf\xc2F\xe87\x1d\x83\xeb?\xcbk\x84\x9c\xfd\x04\xb3?\x82\x127?\xe8\xb6\xd9?\xec\x1cy\xef\xf7\x01\x9b?\x89\x989\x9a+I\xf2?Fv\x8e\xf3b\x1c\xb4\xbf\xd4\xeet+\xa8N\xe4?\x17g\xc4\x11\xfbj\x8c\xbf\x8e\xbb\xf0l\x07\xad\xf0? \xce\xc56\xc5\x8a:\xbf\xee\xdd\x94\xd2;\xde\xee?\x03\xb9\xa4\x8b\x18;\xdb\xbf\x8c?\xe9\xc3Y\xa1\x06@u\xe6<\xcd#U\xa2\xbf\xaa\xcc\x8f\xa1\x94B\xf5?\xfbh\n\xc3\xf4\xf4\xa7\xbfz[\xa5\xc4!\'\xe5?\xad\x8c\xc1\x9f_\xa0\xa1?\x19a\xe7Jr#\xe7?\xf7\x9b\xff\x9b\x98\x86\xa2\xbfO\xde\x8aD\xcf6\xe7?~wO\n\xe6\x9d\xa6?$\x0c8\xadd\x18\xea?\x942o\xdc\x937\xc6\xbf\xa7\xb2\x06p\xa3\xc7\xf3?\x88E\xedf\xc9\xdf\xb9?l4\x11F\xf2U\xe1?\x12\x8c6.S\x85\x86?\xdf\xef\xbb\xfe~\xff\xef?9\x9b\xc9pB\xa3\x90\xbf\xfb\xd5\x8f\xd7\xe0`\xf1?\xbb#@12\xda\xb3?\x0b\xbf \xef\x13r\xe9?\x86\xf0\x16\x84\xfd\xa7\xa8\xbf\xb7\xe5e\xb9\xb8j\xf2?^\x9c\x8b&\xe7\xc8\x93\xbfx\x0c;\x0cc\x1a\xf5?\xee\xfd\x12,\x1f\xce\x8d\xbf\xf6\x1cW}\x8e\x80\xef?\x0b,\xf1\xf8\x18&\xc1\xbfp\xfa\xbe[?\x94\xef?\xb5\xfap}\xc1\xaf\xb3?\xea\x97\x9b\xa6\xa6y\xf2?\xa9\x1d\x82\xe1|9\xa3?\xb5\xb3\x14\xad\xf3\xa7\xf0?\x8efrHE\'\xaf\xbfoP8\x1eP\xc2\xef?\x11\xa9nj7R\xd9?\xa8:\x80\x9e\x85#\xf2?\x9a\xea\xa3#\xb1\x1b\xad\xbf\x8f*\x95XYx\xeb?\x101}\x7f\x11\x9f\xa7?\xce#zAOz\xf9?\xdc\xaf\xae\xa8\x8e\\\xb9?\xd7s2\xba\xf5\xff\xe4?V\x82\xb0d\x07m\xb0\xbfU\xd9\x7f\xd3%\xd2\xf2?H\x8c(\x0e\x03\xbf\xa0\xbf\x12o\x8d\xc5t\xae\xf1?\x9d\xcd*.\x9c\x1a\x95\xbf"\xd1\xd0Y\xd6\xa2\xf3?z\xfb\x06\xcc\x00a\x9c\xbf~\x0e\xd3]U\xc7\xf2?\x8b\xea\xce\xb8\xef\xea\xb6?\xca\xfa\xde\xd2\x13\x9c\xe4?F\xd7\x80z%\xdfd\xbfb\xf7r,\n@\xf2?\xe7\x85\xfa[\xcel\xbc?Y\xbb\xcc\xf7cY\xec?\xb2\xac"\xf7\xd4z\xca\xbfj\xfe\x86\xfc\xe3\xe7\xf8?Z\xd2\xd55I2\xa6\xbf\xb3\xd9.\xb1\xac\xed\xf0?W}|)\xbf\xd7\x94\xbf\xf8\xda\xb8W\r}\xee?\x11Eo\xa4t\x07\xaa\xbf\xe0\xbb\xc7"\xdd"\xf4?\xe3\x03n\xf3\xde\x99\x9d\xbf\xd7u\x19\xa2\x185\xf1?\xa0r\x88w*\xf5u\xbf\x88\xe0zt\xda9\xf0?\x86\xdd\xe9\xe5]\n\xb1?O\xb4n]\xf0\x06\xe9?\xc2@\xda\x11\xdb\xe9\xba?\xa4\x91\x01b\xd2\x00\xf3?\xc3\xc9\x98\xe0!\xdd\x9a?\x16\xcfD\xf7\x13g\xf0?=\xc7\xbd\xb9\x04\xe5\xb4?\x95L\\\xd2\xee[\xee?s&\x89R\xe1\x8e\x82\xbf\x1e\xae\xd0\x06\x12\xb4\xed?\xc5\x0c\xa7m[4\xa0?1\xdf\x8d\x13R_\xf0?\xcfj=\xffb=\xa1\xbf\xaaK\xba\xdf~\xfc\xea?\xb9\x05\xb20\x98t\xb3?\xef\xb0+\x0f\xe2k\xf3?fT\t\xf2\x99\x14\xb8\xbfY\x9c@\xb3\xf6\xb8\xec?\xd0\x06\x8a\x9ff\xaa\xd4?\x86\xd0\n\xe4\x98p\xf1?\xfa8\xd6\xe6\x80\xa2\xb8\xbf.T\xd7\xf3\xe2s\xf2?\xfc\x07\x08\xb5\xffci?\x88\x9e\xffMv\xcf\xee?\xfd\xa4\xe4OI8\x8f?\xce\xdd\x9a8F"\xdc?\xae\xaf\xb7\x1c\xf0s\xc5?\\\xea\xd5j\xa2\x9c\xdf?\x9d2i\x04k\xa1\xaf\xbf\xbbP\xc2\x84\xe5\x14\xf3?~6\xfa\x0f\x95\xa6m?(d{\x181\xbd\xee?\x0e\x93\xe5\xe7f}\xb8\xbf\xd6\xa9\x87\x85)3\xf3?v\\\xef<\xf5\xf5\xc9?\xe5\xa0\xb4\xab\xf1\xc3\xd0?\xfaN\xa74\x90\x90\x96\xbfi\xec#\x9b\xf6\x19\xf0?\x05\xf1Q\xe0L\xd6\xa1?;\xbaw\xf2\xf27\xf2?\xc3\x7fk$\xd2\x0e\xae\xbfFj$l\xad\xb8\xf6?\xdd\x99@\x8b<\xd7v\xbf@Xj\x92\xb8\xaa\xf0?\xf4\xe3\xfb\xb0\x1dL\xb4?\x91\x10_\xceC(\xf1?E\n\x0e\xd9\xa2Y\x8a\xbf\xb9\xff9\xfc\xce1\xef?\xc4\r%]\xd4\xd0\xc0?\x1d\xf9Q\xc4\x98&\xe0?b\x81\x92\xd5\x87\x07p\xbfq\x06yGV\x11\xf3?\x11Q\xeb\x85\xcf\x18\x95\xbf\x9a\xaf|\x1e\xf2\xaa\xe8?u\x11\x85\xee\x13s\xa5\xbf\xc9-f\xd2\x0e9\xed?\xa0Y}\x1d\xb2\x92s?E!;\x00X\x1c\xf3?\xbe\xbc\xc4\x18\xa5k\xc2?\xc5\x06\xd6>\xfeO\xeb?J\xe0\x1e\xee\xa8\x9bj?\x13\x1e\xe9\x99\xd5\x16\xef?x\x9a7\x97\x0c-\x95?C\xe1\x93/>9\x01@\xa2\x81\xde4\xda\x97\x85\xbfvT\xd9\xba\xbf\xa5\xef?\xb2\xdeE\x00\x10\x8cY?H<\x81x\x0f\x1c\xeb?\xf0\x85\xdaM\xb9<\xc2\xbf\xe0&u \x84\xa8\xf8?\xe2\x85\xda\xc83\x8f\x96?\xdd\xce"\xa1\xbb\xb5\xed?\x17\x9a7k\x10<\xb4\xbfW\xad\xf2\xa99\xdf\xf2?\xcb\x13\xab\xb9\xe0\x13\xb9?\xdb\x9b1\xa2\x92\x82\xf0?\xad\xfa\xf2G{/\xcd?\x9f\xf7\x03\xff\xcb\x8e\xef?$\xab!\x9d\xb1^y\xbf\xe8\x92\x928\x87%\xf0?oG\xe9\xb4\xee\xeb\x8f\xbfw\x9a\x1b\xe4zL\xf0?\xc0FC\xcf4\x03\xa6?\x1e\x82\x03\xe6j\x18\xf1?Q\xbc\xa1\x16\xd42\x90\xbfM\xe5\x12\xe8p\xdf\xf2?\xc5\xa3\xc8\xdar\xb5\xbd?3oyS\xdbv\xe9?\x08\x87V\xaa\x8b\x88\xdc?NP\x91,\xf5\xad\x00@\x86a\xa2\x8aE\xd7\x8f\xbf\xbb\xb3<;gr\xf3?z\xa8K}?\\\xb0?MS,A_\x06\xe8?\x90\xc7\xc5\xf2&\xa7t\xbf\xbe\xae\xfb\xde\x86i\xf2?\xa3?\xd2F\xddf\xbb?\xbf\xf7\xf5\x88\x02\x18\xe9?\xf5\r5\xec\x9c\x07\xb3?\x96\xc1k|\xb4.\xf1?Zk\x0c=P+\xc3?\x0e\xdf-\x1e\x93-\xe2?\x00\xc8\xd0k\x97Q\xa2\xbf\x1a\xa3\xbf\x00\xd5U\xec?\x99 \xa0#K\xd5\xc7?e\xc9[\xd7\xae\xad\xe2?p\xbe\xde\xff\x9d\xef\xc5?\xe3\xfc\n\x9c%\xcc\xe5?\xe8v\x00%\xa8\x9b\xa3\xbf\xc9\x9f2-(\xb6\xde?\xf6\x8c\x07\xb8\xf7\xc5\x8c?\xbb\xa1\xbau8\xfa\xee?\xbf\xcf\xe8\xc5\x9a\xef\xc8?\x14\x96A\xc32v\xdb?\xfc\x05\x9a\xf2q\xf8p?\xaf\xd3\xc0\xcbO\xb1\xf1?\xf41Gk\x17\xdf\xbe?E\xac\xd56\x19$\xf5?\xb2p\xc2\xf4%\xd6\xb0\xbf\x86\xaacA\x8a]\xf3?\x088\xc7\xb4[G\xb3\xbft#\xb9\x9c\xe9\xd2\xf6?\x91\x93xu\xbfQ\xb5?-/\xc7:H\x1c\xe6?\xc8F\x81\xc8i\xd2m?\x8e\xf9\xe45\x860\xf1?+\x8b\xd1V\x96\x10\xa0\xbf\xdd\x8b\xfd\t\xa5\x1e\xf1?\xe8\xce\xe6 \x81\x8f\x8b?\xc1\xfd\xf0\x85m\x88\xef?=\x95\xf9e\xd9\xd7\xa7\xbf"H\xe5I\xabc\xf6?\xa0^\x07\xbbP\x0c\xad?\xbfJ\x98?\xeaX\xec?\x94\xad\x83\xceA\x19\xad\xbf|\xd8\'\r\x01\x8a\xf8?\xc6\xc6\x08\x99\xa5\xb6\xdf?\xd70s\xf9\xacZ\xe4?\x0f^\xbe\x1fW]\x91?\x84\xdf#\xd2~T\xee?\xad\xe7U\x13\x17jd\xbf\xdb\x1d\xdb\xf4&\xad\xf0?'
p75
tp76
bag2
(g3
(I0
tp77
g5
tp78
Rp79
(I1
(I2
I326
tp80
g12
I01
S'?>\xab!\xa6\xc5\x8d?\x9eN\x1e\x9bm\x8c\xde?X\xdb\x90k\xce/\x83?\xfc\xf9\xfe?\xfcZ\xf0?*\x9e\xce\xa8\xd9\xfe\xb6\xbf\x1e\xca\xcc\x88\xa5]\xf4?2\x92\xa7\x95\xe2\xc5~\xbf_C\x14D\x95\x12\xed?\x96\xacF\xc3\xed\xe2v\xbf6\xa7\xd5\xa4\xd8\xc1\xef?\xb9\x0cS\x86\'\xeb\xb4?\x87\x13\xbc\xa9\xa3\x9c\xed?\xc6A\xf6X{7\xc0\xbf\xb1\x10`\xb1\xf4-\xec?\x13\xc8\xc1z\x9b\x9c\xc1?\x89\x97J\xd7K0\xfa?Q\x80\x94\xd1/\xa7\x9d\xbf\xcc#\xbd\x17\xff\xc0\xf2?\x16G\n{\xb8`\xca?\x93GqO\x82\x0e\xee?\x1d\xeb\x81\xd5L\xb0u\xbf\x8d\xdeyg\xc4G\xed?\xaf\xb9\x14\xc6\xbfr5?\xea5\xffxAU\xe8?\xe0\x1c\xc1a\x13\xfa\xb1\xbf\x90\xec\x92\xbc\x9eR\xe7?T(\xd2\xaa54\xb3\xbf\xf4\xfd\xa9\xf4\x99N\xf1?{\xc5+\xbf\x10)\xb3\xbf\xa0\xc5\xce\x93\xf1\x8e\xf1?;\xf0\xb3fd\x0c\x86\xbfwu+i\xf6\xe0\xf3?\x9fS\xa5%\xf1\xa8\xa8\xbf\x8f4\xdf\xbc%\xc3\xf2?F\xf1w\xfd7/\xbf\xbf5i\xaa\xd9f\xd5\xf9?\xc5\x85\xab\x98\x9a\xf7\xbc?ln\xde\x15\x15\xbc\xcc?\x98\xd8A@\xb8BZ\xbf\xe2\x94\xaf\x00\xd4\x05\xef?\t]"\'\x12y\x9a\xbfLp\xb2\xfe\xa7\x19\xf0?]\xb1\x14\xcb\xb7)\x9f?\x8c\xaa\xf7\xad\xed\x00\xf3?\x82>\xfc\xbf\xeb\xd5\xb0?\xa8\x19\xbe`j\xf5\xf2?\xe8`\xd0\xc0\x8fA{\xbfkp\xc7\xd6\x07\xa3\xf3?\xff#\xc8\xce\xcb\xc2\xc7\xbf\xe7\x9c\x05\xd8E\x8a\xf2?Iz\xe36\xbe\xf6\xc6\xbf@(\x9e!4^\xf4?\xf90\xe51\x13\xe2\xc2\xbf\xdb\x18\x18-\xc5\x15\xf5?\x073g\x89\x16`\x95?;\xd2\xf7$\xe8v\xf1?p\x10\\\x16\xe6 \xaa?\xd7&\x0bUE\xec\xe3?\xae5\x9f\t\xe7\x97\xb8\xbf[\xbc\x1d\xae\n\x0b\xfa?\xdb\xbe\x833\nF\xc2\xbfb\xf7\xaf\xb5\xea\xde\xf7?]\x80\x08\xd2(\xe8\xa9\xbf\x7f\xc2\x15H`e\xf2?:\xe1}\xd7\xac\x8c\xc5?\x17\x92\x19\'\x91!\xd6?7\x1b\xa2o\xb2\xb0\xbd?\x08s\xafV\xa9\x82\xf0?\xacMB;\xd3\xd9\x9e?\x8c\xa91`\x9cl\xf2?=\xfd\x7f\xb1`K\x91\xbf\xcd\xfb\xfc\x15v\xa9\xf2?!)0\xafL\xea\xb6?\xb7\xe8\xf6-\x87+\xed?\x0e\xbf\x92\xa0\xfb\x99\x92?F\xfa.^\xbfE\x01@\xca2\xa7*>l\xd0?\xb4\x8d#\xec_X\xe8?\x81\x03\xff\x19\xbdP\x8b?\x9cKtr\x85\x12\xf5?\x96\x80n\xf3\x9d\xf08?\x93\xe1\xef\xe8\xe0\x07\xf0?l\xdd\xe6\x17\'6B\xbf\x87\x00\xf0\xb5\xa1B\xf1?\xa9)_9\x9e\xef\xab\xbfd\x1bSK\x8f\xd7\xe5?\xef\x96\xcf\xfc1\x02\xbf\xbf\xdd\xa9:\xc3&\xad\xfb?\xbb\'\x1dS\xa1\x17\x9b?\x19\x84\x0e\xa4\xb7\xcc\xed?\xe4\x83\xe5P=\xac\x94?H\x0fC\x07\x1d\xdd\xe8?\xa7\x0f\x0e@.\x81\xd1?;\x8a\xee\x17\x99\xe4\xd4?\xfe\xc7s=\xb0)\xa5\xbf\xe1\x8f\xd9\xac-\x90\xf1?\xc4\x99\xe8\xa5vu\xfb\xbf0\xf8\xba\x0e\x11\xb3\x1e@w\x05\x80\xea\xcc\xe6\xba?\xe3\xb5\x8e\x8d\xf3\xb0\xea?\xd5\x98\xb5FD9\x91\xbf:\xd5\xfc\xb2\xa7\x01\xf7?f\xd8\x8d\xcf\xf3\xd2\x08\xc0.\x89\x10zz\xd7$@\xfbd\x12\x87`+\xc0\xbf\x80E\\9\xcdX\xf3?@\xado\x8aQ\xcd\xcd?\x97\xaeNF\x87\xd1\xf3?}\xcf\r\xfc\x89Y\xcb?)\x11\xad\xa5\xd3\xa6\xf1?\xf6\x91\x84\x9e\x99\xa4\xa8?\xd1u\'\xd2b&\xef?\xb4r\xef\xf1\xd2\x03a?Y\x17\xd6R\x0f=\xf1?\x19\x99p\xdc\xec\x99\xd4?\xd4\x17#O^\xc7\xe0?u\xb8b\xac-\xb2\xc8\xbf\xcdly\x98\x88\x00\xf9?1\x85\x07\x0c\xf4\xbav\xbf\xaf+-\xf8\xab\xd4\xef?\xb0\x1c3\xed&@\xd3?z`i\xc1\xb0W\x00@\x8bl\xcf!C\x03\xa5?\xba\xfb\xf6I\xe5\xa1\xea?\xac\xaa\xca\x8cdI\x90?t6Ap\x10p\xf7?x*\xd2u\xdd\xd3\xd4?\\\xab\x98\xf7o\xad\xf0?X\xbe\xfe\x84\x80\xc7\x9f\xbf\\:<\xb3\xbeS\xf4?!\x9f\xd4\x16\xda\xbd\xc3?\xc1\x06\x07\xf4\xca\x1c\xec?\x90i|X\xd0\xdc\xbd\xbf\\\x94\xf2T\x96\x1d\xe7?O\xfa/FI\xf9\xd6?\x85\x17\x04\xf4\xab(\xf1?,\xc6\xfce\t;\xbf\xbf\xd1\xaf^\x97\x9a\xc8\xfd?\x8daJo\xb9`\x9a?\xb3\xe5\x8b]z\xd7\xec?\x16\xdb\x95M\x01\t\x9a?,,\xb2\x07\xb8\xbd\xee?\xef\xecV\xfe:~\xb2?\x18Y\xc8\xee\xe0\x95\xf3?\xa6\x1e\x8dUmB\x8c?Y;\xf6\xb1,\xa2\xee?\xf0b~*4\xa4\xc8?\xcd\xe5\x90\xc7\xc7\xd8\xf6?\xe53\xc9x\xcc\xf1\xc0\xbfY8\x04\t\'k\xf8?f\xdd\xf8`\x189\xa8\xbf\xc2\xd0\xbf\x02\xd8q\xf2?\x94\x0f\x02\xe3k\x84\xa3?%\x95\xde\xa0V6\xea?\xd4pxX<P\xa3?L\xf1\xf3\x93dv\xe1?~\xdakJ|\xcdz\xbf\xcf\xefv\xb7\x94\x17\xf0?\xaa\xd7\x11\x91CF\xbf?\xec\x80I\xdb"O\xe0?\xf1\xaf\x03x\xfc{\xbc?\xed\t\x02\xc9t\x02\xf8?\xb6e|U\x90Z\xc0\xbf\xad\xd7s\xc52\x88\x00@\xd16\x94\x8a\xe3\x10\xca?\x90-V\x19A\xe3\xe8?\x04?\x94\xe7\x82\x94\xaa?\xeamU\xff\xc6\x96\xe9?\x07\xb6e\xd8w\xa0\xa8?\xcd\xa3\xf7\x0cX\xa8\xf1?.K\xab-Z\xd1\xa1\xbf\xc5,\xbf&\xc3;\xe4?\xc9\xcfB\x7f\xe2P\xa6\xbf\x99\xed\x97ty\xfa\xee?SN\xebn\xf8Q\xa4?5\xe41\xb7Q\xbf\xe9?\x9a\xb67\xaamDy\xbf\xd1)\xeb\xcare\xf0?\x85\x9c\x1a/)F\xba?\xd4YTC\xc58\xec?"\x8d\x9f\x8f\xdaf\xc0?\x9c\x0eLV\xd0t\xe4?\x7f\x8d\x1f\x14\xb2\xd2\xd3?\x98\xd6\xbc\xff\x16\xf7\xe1?5=R\xc2\x84#\xa2?$t3\xdf|B\xf1?;G+~;\xa4t?\xd9\xae\xddc\x7f\xcc\xf2?(\xacx\x07\xaf\xa4\xbe?\x19n\xd1\x06\x1a\xf9\xd2?\xfc\x87\xfbO(^\x85?\xbb:\x83\xc9\x04\xf7\xec?|\xc8\xf6\x1fZ|\xde\xbf\xf44)\xaa\xcd\x02\x07@\x88|HS\xf8\xd6\xcc?A\xf2\x85$\xc9&\xbd?\xdb\xc3\'\xc4\xf7J\xc6?\x82\xd2${\xe4\xbb\xe6?}9\x9a\xdf\xf1\xda\xc2?\xf1\xfb\xeb\xafB\x8d\xed?!\x038\xaf\xcd\xaf\xab\xbf\xa0\xc1\xff}_\x85\xf0?\xecWV\xeb\xb5\xb6\x92?\x89n\x9d\\\xda5\xeb?\x19=d\x01\xe0n\x8a?<\x03\x85u\x891\xf0?\xb8\xf3\x7fVZh\x87?2ro8\x1f\xe1\xec?\xba\x87\x89\x1d\x8e3\xe9\xbfC\xcb\x9f\xc5"\x16\x13@d\x92\xefa\xa0\x83\x8a\xbf\xc3\x08\x91\xe8\x03q\xf0?\x8f\xdf\x8dw\xb0\x19\xb2\xbf\xa0\xec\x0b\xf05\x1f\xeb?om\tN\x80\x9f\xa0?\xfb\xebE\xa3\xb9\xd2\xef?\xf2\x03\xe6(\x0e\x98\xb4?\x82\xd8\xeePa\xb1\xe3?u\xa5\xb0_\xd7k\x83\xbfY\x80\x0e\xf8\xf0\xe5\xea?\x12\xd5\xf8v&\\\xcf\xbf]\x7f[\xe4\xaf\xf2\xfe?k\t\xfe\xb9\xc8\xdb\xa0\xbf\r\x15s\xa5\xc6\x93\xe6?\xf8\x83\xdd\x06\x11;\xbf?\x86\xa6\xbe\xe4?\x89\xe8?\xd8\xd6\x94j\x94\x0f\x97\xbf\x06W\xb1\x0fx\xfe\xf1?e*c \xe0N\xcb?J\xfd\x9c\x86pe\xef?p\xa2]\x88\x01\xa3\xc0?\x90\\\x92\xb1\xaa\xe8\xea?\xa9\x9ca:\xbd\n\xa9\xbf\x18\xcd\x99\x98h\x04\xf5?\xab\x98\xd6\xe4\t2\xaf?\xd4\x96\x1f\xd5\x11\xb6\xf1?\x8d\xd0/\xc4\xe6\xb1{?\xad\xeb\x93\xdf\xf26\xf1?P[N\x8bnY\xb6?\x8f\xdcn\x08\xc7B\xf0?\xddj;\xeb<@\x80\xbfd1\xb0\xd9-\x9b\xf0?e\x08\xe31.L\xde?\x14\xaaH\xbd(>\xe6?\x98\xf2\x97h\xab\'\x98\xbf\xe7\x13\x1b\xb8\xa8\xf2\xf2?\xe2\x8c\xc5F\xd7\xcc\xcd\xbf\xa2\xe9\x85\x86\xf2\xe7\x04@|\x19)`\xa9f\x82?\x9fz\xee\x13\x85t\xeb?\xf4\x04\xe3\xa7@\x9b\xa3?\xce/\x04D\xf7\x86\xf1?\x17\xba\x9c\xb6\x82\xc1\xf1?9\xe0\xd5\x81p\x9e\xe7?\xfd\xc9\xac\x06\x8e]\x90\xbf!\xc0\x11\xf7\xe4\x0f\xe7?\xd9:\xea\x17\xaei\x85?\x10#3s\x0c\xdf\xe4?\xe8\n\xcc\x95\xd9_\x90\xbf1\xad,[\xcdl\xf3?ht\xf0\xf9\xbc\xaf\xc7?\xab\xe8\xbd\x14\x83\x06\xf6?\xc0\xa1\x00\xa1\x11\x98\xad?\x18\xaaO\xd2\x93\xeb\xf2?\x10\xe0f\xe8|%\x95?\xd2\rD\xab\xa3\xcc\xec?\x19c\x874(\xb7\xc2?\xe6\xbf\xf5Mz-\xe8?\xdb;\xee\xa7\xb8\x83\xc1\xbfi!~\xc3#\x0e\xea?E1\x9dY\x93~\xe6?\x12\'u\x0c\xefA\xe1?\xb8\xa1^)D\xe8\xb9?4w\xf7+\xf5\xbf\xd0?\xcd\xd1KL)}\x95?JU\xd3\xfa\xa9N\xf9?\x06!y\xa0\xc5(\xb8?,|\x01\xae\xd4\t\xf0?\xdaB\x8a\x83\x84\x9d\xab?W\x9d\xe2\xdc"\xd3\xf2?\x9f\x01\x8ci\xb6n\xa2?\x90\xddb\x08\xd3\x93\xf2?\x02=\\\xfd\xeb\xfe\xb6?\x90hy\xba\xba;\xf0?\xf6\xfc\xff\xb0\xe1\xa6\xaf\xbf\xad9\xb9S\xaf\xe9\xef?0\x13\x8bf\x983\x8c?x\x9bkO\x00_\xf5?\xf5\xd63\xe4P\xcf\xa0?\x8c.N\xe2\x8a\xa5\xe9?F\xf7\xaf\xc1\xf8\xc5\x1c@\xaa\xd0\r\x8c\xa0.\xe6?\x8a@\x00J\xef;\xa1?\xdfb\x8a\xb6\xe0\xbe\xf2?\x88\xea\x1a\xe1\x86\x8a\xa6\xbf\xf6\xd2z\xd9\xc7\'\xf1?\xfed\xbb/\xa3\xc3\x98?\x9c<\xa6{Y\x03\xed?!*jx\x01\xbf\xbe\xbfT1:I\xc8\xde\xf3?\xd9\x18mzq\x02\xc0?\x8e\x9b?!d\x88\xee?\xf6\xecr\xc58\xd4^\xbf_U\x98T/<\xf0?\xc2\x9f%\xcc|-\x9a\xbf\x8e|\x81\x1d\xa1\xe0\xf0?W\x84*\x11ufq?\xe3\x9f2\xa4\xe6\xcc\xf5?ak\x84\xbff\x96\x99\xbf\x15\nw\\2\xa7\xef?\xf7\x00\xd8<J\xcd\xb0\xbf\x1b\xc1\x84\xc1\xfb\x8b\xdf?\xe0\x14\xf0\xac\xfb\x9eu\xbf3\xadp\x06\xbc9\xec?\xcc\xd4d\x82\x053z\xbf\xdb \x1a\xdd\x98\xbc\xf2?\x01\xec~\xaf\x1d\xba\xb3\xbf\xbfw\xc4\x8e\xd1\r\xfd?\xb2Q\x15\xefv6\xb2\xbfT}\xcb\x8c\xe0\xe3\xec?\x02\xae\xb1jO{\xc8?\xa7\xa2{jn"\xfa?\xfbk\xa0\xf8r\xf7\xb0?\xe0\xa0\xf3T+\x0b\xe2?\xbe8%,\xfe,\xaf?\xb8\x96\xd6\xec\xa6\x9b\xe3?\xb0s\xb2\xc8\x95\xe3\x8d\xbf\x86\xaf.+*v\xf1?\xe7\xb4\x9fs\x92\xd4\xbe?=\x99\xc3\x1a\x1d#\xf6?\x08\x03\x88o\xea\x16\xd1\xbf\xf3s\xa3\x8bs\xa5\x07@Z\x92\x8d\x84(Za\xbf\xf3Z\x80\xa7\x8c\xc0\xf0? \x0f\xaf\x10\xab\xc5\xc5?!\xd5\xf5\xa4\xcf9\xdf?\x92\xdaRDg\x94\xca?\xa2>Q\r \x88\xe2?\x04^\xfa\xb5\xee\x19\xaa\xbfSY\x8b\x95\xdd\xf1\xf4?\xf7S\xe8\x86`\x8e\xbd?\xb9\x0c\xfa\x16\'\x08\xeb??=&\xd04\x19\x91?\xd3]\xfa\x8d\n\xf4\xec?\x14\x8c\x9et#T\xa1\xbf\xd4\x9f$\xf4g\xad\xf4?\r\xed\x9f|\xaf\xa3y?J\xbe\xeeE\xa1\x96\xef?\xc7\x01\x0c\x9b\xca\xbe\xc2?$\xdb%L\xaa"\xf1?\x99\xa8\x04\xdb7\x1f\x96\xbf\x94%\xf2"\th\xf1?\xfdTh\xf6\x14\xf0\x93?\xd9 \x9c5)\x93\xeb?\xea\xbe\\f\x7f\x82\xb6\xbf\xe3\xc2p\x0exl\xef?\x9br\xde\xe9\xa1\x19\x82?r\xcf\x1a3\xf8\x8b\xf8?Qj~#Ad\xb3?\x9b\'\xa8\x87%s\xf0?m\x8f\xf2J\xc0\xa7\x96\xbfp=\x80\xcc\n\xe4\xf0?O\xa5\xab\xf8\x93w\xa8?a\n%wM\x15\xf6?O\tTH\x0c^\xd4?\x1f\xbew\xa5\xf7\x1a\xe6?|\xe9m\r\xde\xd5\xa2?\x05\xda\xab\x04\x8a\xa5\xe8?]B\xb7\x92\xbb\xbf\xa1\xbf\n#Fu\x1b\xe8\xf0?\xa0\xcc\xc6\xef\xb4J\x9e\xbf\xa7q\xe3\xa8G\xda\xf5?4\xd69\x91\xb6\xd5\xc4?\xf4i\x8c\xdd\xc7R\xf0?i\xc6\xb6\x8d\xef\xdb\x9b\xbf\xe8b\xf2\xb9C\xf0\xf5?\x9e\x87\xd4\x9b4\x98\x85?t\xbe#\x07\xb2\xef\xf3?\xbf\x80<\xb9~;\x9d\xbf\xc5\xa4\xfb\xe9\xae\x02\xf2?\xbdV)\xca\xc2\xe2|?\x89\xdc\x86U\x91\xb9\xf1?\xe9:h\r\xbd;\x96?\xdb\xe4\x9a\x8e\xabq\xef?*W\xd3}\r\xe9\xad?}\xe0\xb7\x18\x81\x1e\xe7?\xe0\xf2\x08R\x15\x9e\x99?\x95\x8e\xcf\x9b\xb1\xbb\xee?\xc1\x80d4\x94\x14\xca?p\xcf~\x0f\xb3\xb1\xe9?\xf2\xb8t\x92>u\x07@\x83w\xa6\xe9%@\xf5\xbfl\x92\xa66\xc2\xcd*\xbf5!`\xbd\xfef\xe6?\xe5\xf7\xf0\x8c\xdc\xe4\xbb\xbf\xf6a\\\xf0ma\xf7?f\xe0fL2\xe4\xa2?^\xe9\xe6\xf9(\x8a\xf6?\x89z\x1cE\xf1S\xa9?\x0f/\x1f\xa1\xfa\x14\xe6?4O\xd9\xdc\xd1o\x87?\xa4\x98w}\xe5p\xef?U\x18tb\x90\x1d\xaf?\xe8\r\xe6\x8d\r\xf3\xf2?\xf2\x8f=\x0e\x11B\xa6?B\x00\x85\x12&J\xf4?\x85d\xa8b\xbb\xac\xe1?\xf5\xa8\xf0\x8a\x14,\xe0?Z\xeb\xac\x9b\xd4\xd5\xc3?b\x82NmO\x83\xe2?\xef\x17f\xcduj\xc1?\xf1\xd5\x06\xd8\xc0z\xed?i\x8f\x87\x07\x97\x1b\xa7\xbfbt\xe8\x0e%\x10\xf5?\xbd\x8c\x98~\xeff\xcb\xbf\xfdt\xf1.\x06S\x01@y\xd2\xd3\xba\x93\x99\xbb?\x96\xa4pt\xc4\xc2\xf0?\x1dV\xc0\x14\x15D\xc0?\x803\x01\x01\xb3(\xef?\x01\x061\xe0\x0c>\xa1?^Z\xc1\xe9\n*\xe6?v\x8bp\x03\xa7\xfd1@sB\x168\xed\xab*\xc0\x02\xa4m\xd5#r\x7f\xbf\x00\xa3\xf8(\x8f\xd7\xf6?\x1c=\x90\xac\xe6@q\xbf?\xd7\xd5\x92\xe5\xcc\xfb?t\xe1\xc01d%\xa4?\xe4\xad\xacEk\xc2\xe9?_\xbcp\n\xe3\xdd\xbf?\xbf\xfa\xf2\x12\xe6\x87\xf4?\xa1\x8aY\x8a\x17M\xcb\xbf\x85\xe2\x06\xf5\xfc\x0c\xfc?\x125\x08D\x97\xd5\x9e?=\xbd\xc3u\xd5\xba\xe5?\x1330\xa4q\x90S?G\x8e?\xacr\x9d\xf0?\x06:E\x1f\xfe<\xb7\xbf\t\xe3Q\x08E?\xf0?t\x90r\x0b\xa8\x98\x91?\x8a\xdfHRO\xb2\xd5?GQqyH,\xa3?\xd9\xe6U\x82\xd6\xa9\xeb?\x81\xbfC\xacS\x83\xc4\xbfz\x0c1\xdc\x8b\xa3\xf2?\xfeX\xba\x07\x07\xa5\xaf?#+\x82\xee:\x02\xd2?\x84E\xa7)\xc5J\x93\xbf\x8cD\xc8\xfd\x983\xf2?\xf5O\n\x84\xbc\xc0\xa2?I\xdf8\x91\n\xda\xe9?\xe4\x00\xf1,N\x0c\xb8?\x10\x90c\xcdV\xac\xe8?\x1b\x95\xac)\xf6T\xa0?\xc8\xedys&<\xe4?z\\\xd8<\xb2\xb9\xb7\xbf>V~\x89\xdb\xd6\xff?\x92\x97\xd6\xdf\xb6\x95\x81\xbf\x9c\\\x16\xbdc\xac\xf1?G\xc2x\x95Z\x8f\x99?\x08\x1f\x04\xee\x9b\x1b\xeb?7kb\xe1\xab\xc4\xc0\xbf\xa4\x94\\d\xfd\xc9\xf2?\x96\xab\x92iL\x13\xb9\xbf\t\x8a\x91\x0e.\x01\xf0?s>\x84\x18\xaa5\xb1?\xa1\x86\x1dCK \xef?:\x1e\xe6[c\x01\xb0\xbf]\xb4<\xf0Q\xac\xf6?\xfa\xf1\xad\x19\xfcn\x8e?\xe9#\xc0N\x07\xb3\xf0?\xeb\x97\x92\xc7@\xf9\xa6?S\xfc \xd7m6\xf4?5\x87\x1b\xda\x06\xeaj\xbf&H\xbc|\x90\x87\xf4?\xe8\xaf\xeb\x95tM\xb3\xbf\xff\xf3\xf8,ct\xfa?\x85\x84U\xcd\xcdex?\xb5q\xbf\x1b\xce\x88\xe9?\n\xc1\xab\xed^=t?\xc3|\x85\xd1\xf7E\xee?\r\xc9NE\\\xb3\x99\xbf\xcc\\\x08\x86\x95\xe8\xec?kI\x94\x0eK\xd8\xab??\x81\xd2\xab\x1c\xcd\xed?\x13b\xb6\x80ur\xc4\xbf\xb2;-\xf5:Y\xf7?k\xdf\x8dWmh\x97\xbf\x0cj2s\xa8\x0c\xf0?\xe0j\x17?\x8c\x9d\xce?C\xf9\xe6\x0f\xeb\x84\xe9?j\xab0%\xdc\x06\x97?\xf60\xe7b\xa6\xec\xee?\x03^\x9aH\xb9\xaf\xbf?\xc4~\x84,Z\xcf\xea?\x9b\xa1\xe4\xbalH\xbc?\xddf\x90\xb2\xc3\xe0\xd4?\x91Z\xe0\xdc{\x1d\xb3\xbfA\xd3\xb6Y\xfc\x1f\xf9?\x1a\x05]\x1a;bn?D,\xd4\xeev%\xf0?F\x9a\xd1@\x90\x1c\xc9\xbf\xed\x90i\xe7\xc1\xc4\xf3?\x93!*\xf8\x13\xb7\xbb\xbfW\x1f\x88d\xc7y\xf8?\xe9\x97\xbc\x85\xaa\xf1\x92\xbf\x9b\xf9j\xdaG>\xf1?\xff\xf7$w\n\x8b\x82?\x88\x91m\xe1\x99\xd0\xf4?\xd8\xaeQ3\xec\xb5m?P\x88\xf9\xa1\xd5\xd7\xf0?5\xd2<\xae#\xe1\xa1?O2\x98\x1a\xa4/\xe4?q@\xe0\x7f\xf6\xd3\x84\xbfi\x9f\x86hi\xde\xf0?\x1b\xee\xfb\xff\xd9#\xbe\xbf\x04\x92\x9a*i?\xf3?\xcd\x83g\xd1\x8e5\xae?\x19\x9f\xa6\xd8\x0b;\xe6?\x13ped\x0c5\x94?\xc6\xdd\xf3\x94,\x8c\xe6?\xb1\x98\x94\x87)\xb8\xc1\xbfc\x98\'r2\xa5\xed?X\xbf\xf2\x15\x7f(\xbf?\x87\x82\x0e\xb4#\xc0\xf8?e\xf8 Z"\xca\xde?2\xa9a\xd9\x9cX\xee?Lt\xe7\x84J\xb5\x8d\xbf/_s\xcb\xb0\xcc\xe8?-f{\xa6\\\x0f\xc2?99B\x1f\x91\x83\xe6?8\xa4\xd1\xa3J\x81\xc8?\xd2\xd0\xf4d\x13\xbe\xfb?\xee\x8b\xb1\x9b\xb8\xf2??\xc2L\x11D\xb2D\xe9?\xb1\xc8,e#\xf9\xb8?\xe8\xe0 R\xe2\xb3\xe0?\xf9\x99Y\x96\xba\xa3\x83?\x85\xbf\x0cT\xc0\x8f\xf0?*@\xe7\t\xd5\xd0\x90?c\xeaY\xb2\x10\xf7\xf0?\xff\xec\tD\x8d\x16\xce\xbf\xa7{\xc8ob\xeb\x05@5\xd7{v\x0c\xfc\xac\xbf\x00\xba\x00Z\xa9\xcb\xf4?\xe3\x00\x8dR\x0b1\x84?\x9e\xeba*\x12\xa0\xea?\xee\x94J\xe1\xe2f\xa1\xbf\xcd\xc1<\xad\xf1\xe2\xee? \xa5\xd0\x85\x92 \x9a\xbfd/I\x1b\xf4\xe8\xf1?\x8d\xfa\xdd\x10\x1fS\xc4?\xa6cxj\x08\xe6\xdd?\xc2J\x12(u\x8e\xa4\xbf\x8ds\x99e6\xda\xf3?\x0c0\x88\xf3\xce\xf0\xe2?-\x84\xed\xf2}a\xdc?\xdaR\xa0\x03\xd0An\xbf\x13\xfa:\x1bUh\xf0?w\x0c\xd6kf\x9f\xaa?\x12\r\'-\xfd%\xf1?\rAx\xa9cc\xc0?\xd7\xa8zTY\xc1\xdf?\xb5l\xe8uf\xc4\x91?\x80i\xf5\xd2\xd0V\xe9?z\x85\x8b\xc7\xd7\x86\xc9?ASK8\xb9G\xf5?\xd6\x0c\xc9\\\xdf_\xd6?\xe1v\x83\\\xc5\xf4\xef?\x9a\xed=\xc68$\xbc?~Kgq\x90\xd0\xeb?Fd\x16N\xf7\xee\xc5?1\xb1\xc8\xaek\xce\xf6?\x93\xff\x1d\x06\xff\x9a\xb7\xbf\x896j\xb5X\x92\xf1? D\xff\xc3\xe42\x8f\xbfZ\xeb\x85\xe4\xa1\xa8\xf2?ol\xed\x11D\xc7\xa5?\x84B\xf4\xe7\xecR\xf9?n\x1c\xf7`\x1d\x15\xc3\xbf\tJNh%3\xed?\x13\xeb;\xady\xd6\x99?k?~\xb2\xb9\xb2\xe5?\x94\xe6\xeb\x95;\\\xb2\xbf\xb85\x93T*\xfb\xf1?\x7fP\x9b\x7fc\xc2\xdd?\xb9\xeb\xc4v\xac\xc9\xdc?\xd8\x0bG\xf1\xf7K\xc7?b\x83\xcf\xe8j\x0f\xe1?\xf9\xb5\xbf\x17\x1d\xbcR?yb\x8e2\xdd\x0b\xf7?\x81\xb6bm\xa9\xa8\xb1?\x1d\xd7\x03h\xfc\xd9\xec?\xf4j\xce\xe5\xcd\x04\xc7?1\xe5FE\xef+\xe1?8w!?\xa9\x8c\xa8?\xf1\x8c\xcd\xe2\x95\xfa\xeb?D\xee\xd4\xbb\x06\xd1\xdc?\\|-d\xd6\x93\xeb?\x93x\\\x0c\xe4\x1b\xba?\xc8h\x86I\x91,\xf2?\x08\x9d\xea\xb1\x1b\xd0\x9e\xbf\x85U\x1d\x9cUX\xf6?d\x7f`\x96\x84\x88\xa1\xbf\x85;K.f^\xf4?\xfe\x0e\xbct\x99\\\xb0?{i\xecC\x97\x0f\xea?\xf2\xa03\xfc\x1b\xc2\x92?\xd5\x10Cc}\x17\xf0?\xff\xef\xb7N\x87\xa4X?~\xaf\x8f\xc7\xa4\x85\xeb?Q\xab\xa7d\xfb\xd8\xb8\xbfn\xcc\xf5\x108A\xf3?\xfe\xaf\x95\xe6-\xe0\xc0?\x1b\xea\x01\xa6{\xaa\xeb?\x07\xe9\x1d\x08k6\xae?p\xc1\x02Sn`\xf1?~\xda):\x03z\xa9\xbf\xe0\xba\x87!\xa2;\xed?\xf8\x91/\x05X\x8e\xa7?\xa7\xfa\xa16\x7f\x19\xeb?\x14>[Y\x7f\x81\x9e?\xd7a#\xd8F\xce\xf0?\xb5\xcc\xab\x84\xfb\xd4\xba?":o\xc7\xf7\x13\xd1?D\xb5\xd4P\xf6O\xc9?\x8cEZ\xbd0\xa8\xf1?\xdb\xd9\xcd\xe6|\xdc\xbf?x\xc4\x01\xc2&S\xde?\x1b2EL\x8c\x8e\xa6\xbfHk.\x062Z\xed?~+#qQ\x8f\xb4?EA\xb4\x8e\xe4\xc6\xef?\xa7\x83\x9b`SU\x9c\xbf|U\x94`\xeb\xdb\xf1?\x8aN.:\xc1\r\xa2?V\r\x14\xa4p\xa4\xe4?Z\xf0\x87o\x81/\x9d?H\xe3+`Y\x19\xea?6K\xa0\x84\x9c\xba\xc0?\xb259\xed\x97\x97\xf4?\x1c\xf8L\x97\xe3P\x8f\xbfON\xf3\x15\x91\xe3\xf3?ewm\xb3>\x18\xb0\xbf\xf4\xbc\x8c\x98EK\xf0?Z\xebEM\xf4r\xd9?\x85\x93\x14fb\xa3\xe6?H\xed\x1e\xd2,\x93\x83\xbf\x90S\xfdk\xce{\xf2?\x9d\xc0\x8b\xa4\x13v\xc0\xbf\x9b\t\xaa\nL\xab\xf9?'
p81
tp82
bag2
(g3
(I0
tp83
g5
tp84
Rp85
(I1
(I2
I107
tp86
g12
I01
S'\xc25\xddt\xea\x8e\xd9?\xffT\xc0\x81\xb8x\xf5?\x1c\x89\x17\x82\xbe\xcb\xca?\xbe\x0c\xe8\xca\x81\xca\xf3?\xe5h\x82\xbb\xda\xea\xe8?\xed\xcf!\x95\x9b\xcd\xdc?8\x12\xed\xf9\xf6\x9d\x85\xbf\xb5\x06D\'\x1d,\xee?\xbd\xad|\xe6\x1d\x05\xce?\x8d\x1e\xe0\xeb\xedb\xe3?\xc9y\xfd\x81\x03j\xb0\xbfc\xc3\xee\xe1\x9c\xe6\xf3?S\x1d\x1b\xc0\x8d\x8d\xac\xbf\xd6\xb6G[e{\xf5?\x13\xfd@i\xf3\x07r?bG\xcb\x84\\\x16\xda?5\xd6p<D6\xe4\xbf\x11ab\xd0,\x0f\n@\xb1\xcfT\x81\xd9Xc?\xaf%\x9e\x0bT\xc3\xee?\xc7\x00\xa0n\x96\xfc\xb8?\xb1\xfd\x15&Wp\xd7?8\xe7\xda\xec&9\xbb?\xa6\x0c`Tc}\xc8?\xc9\x98M)\xd1\xe0\xc0?\x92\xdf\xadc\xe3+\xf6?\xa0\x02\x9e\x08\xd9\'\xb2?\xce^p\xfd\xd9\xa8\xf3?\x12\xde\x03\x80\x07\x9d\xc5?S\xea)\xa5\x1b\xac\xf0?\x9cE\x99Z\xa7\xeb\xc0?\x95\xf9\xc5\xe0\x9e\x13\xf0?\x88e\\\xd7\xf1\xbf\t@\x11-\xab\xec\xd9\xec\xfa\xbf$c\xed\xb8V>\xa6?\x1b\xe8\xaf\xc9\xedD\xe5?^\x1cF\xf9\xfa\xb1\x95\xbf\x0f,\x97*\x98\xc8\xf1?\x8b\xf0\xad\xc8\xfa\x1a\xc3\xbf\x01\xa6k\x9bb\x81\xf8?K\x17M\x99\xfd\x9a\xb6?\x1f\x01b\x01\xf22\xe8?s\x97*jhi\xa7?\xc6)\xb89\x8d\xfc\xe6?)\x04\xb09\xdc\x04\xba?\x11\xc2\xefu\x91\xd3\xdf?LkM\xf9\xb8\x11\x93?r_\xdb2\xb1\xe5\xf4?4m\xcc_\x0c\x8b\x93\xbf\xa2\x18b\xc1\x0c\xca\xf3?\xfeM~\xca\xfcG\xb0?Q\x87H0\xfch\xea?\r\xa5\xa8H4\x9d\x81?\xd8\x12V{\xac\xc0\xf1?c\x08\x8d9\xa3]\xaf\xbf\xd1\xb5\x9a*n\x9b\xee?}\xcaL+~\xf9\xba?^p\xcb\xed\x0c.\xed?\x0b\xba;u)\x00\xb0?\xcf\x98\xca\xe3\x91L\xf1?7\x01\x98Pk\x07\xba?\xb3\xf1\x06\xbfFA\xfa?\xe4\x12\xbf\r\xb15\xc9?\x80\x03&\xa0P\x92\xc0\xbfj\x1c!\xbe\x13(\xca?\xb50\x15\xfb\x12\xce\xec?l\xea\xabZ\xc4\xc4\xcb?C\xa7A\x89\xcc\xca\r@1M\x13f\xb2\x11\xa5\xbfkI\xc2\xd8\xb5\x0b\xf3?g\xcf\xb3\x7f\xcb\xc7\xad?X\xbc\x96\x0c"\xe3\xf6?\xd6\x19N\xae\'[\xa3\xbf\xa9\xec\x14\xe08\x94\xea?C\xd5\x0b7o\x00\xb3?MJ\x8c\xaf6\xa6\xf2?\x84@\x1aA\xac6\xb9?-\xaf\xa9E\xda\xab\xe9?\x0f\xb1;KC\xd9r\xbf\xad\x02\xb4\xd9\xa5\xcd\xed?\xf8\xdc3\xe8\xe7\xb4\xc9\xbfg\x82\xdfE8\xbd\x04@dYf\x87 O\xd5?*ltU\xba\xc8\xf2?\xcf\xaaU\x88\x0c\x8a\xbf\xbf\xd44>\xb9I\xb4\xf0?lQg1O\xef\xa8?\xb0\xfb\xa0\xd8[\xbc\xe9?\xefSw\xde"\x11\xca?\x12\n\x19\'\\p\xe4?s;\xd4o\x08\xf3\xd3?\xdf\xb6\xab3\x92&\xe6?\xce\xfe\xb1N\x97\xfe\x80\xbf\x0e)\x0e\xcc\x11\xaa\xe1?yc\x1f\x07\xa1t\xcb\xbf\x90\x0c\xd4h\x1f\xb0\xf8?\x187~\x10\xfdJ\xaa?V{\xa4\xbd\x91\xcf\xee?Y\xea:D[\x9d\xd4?\xcd\x86S\x03\xf5W\xde?\x88\xd3@\x81\xce\xd0\x90?\t\x93\xf6\xfe\xa6G\xf1?!:\xcb\xd3^\x8c\xc6\xbfAA\xcb\xbf\x95\xf9\x08@&\xd3-_\x15\x9f\xd3?\x03x\x98\xbc\xdf\xd0\xe3?\xa9\xc8/<,\x97\x8a?\x18\xbd;\xd4\x0e\xd8\xef?\t\xa24\xac\xea\x8c\xc3?D\xbc\xc42\x9b\x9d\xf3?8\x8e\xe4K\x85G\xad?\x12\xdf|\xe7\xbd\x12\xe7?\xae@\x15`\x10s\xc1\xbf\x18El\x85\x8c\x95\xfc?+2\xe2O\xc7\xdf\xfd?\xb2j\xfd\xf7\xb9\x8c\xb9\xbf\xe0\x1a\x11\x10?\x05\xa3\xbfF\xc6\xf4\xa4\xcax\xed?v\x9b\x83t\xf0\x7f\xa1?\xae1\x0e~\xcc\xd4\xdc?\xc6\xae\xfe!\x1cU\xb2\xbfm\x06s\x86\x18Z\xec?\xcb\xed4J\xb9\x1a\xd0?\xec7\xe2K\x99\xa6\xf7?\x9c4\xeb\xf0\xc4\xdc\xbc?\xa9E\xf4\x954\xda\xe8?A\\\xf4n/*\xaa\xbf\rfd\xa0\xf6\xea\xf8?a\xad\xb9R\x9a\x15\xc2\xbf\xf5\xe8\xce\xf1\xf5S\xe5?2~/y\xaba\xa6?\xbdm?@\x17]\xe9?\x1eJK\xba\xcf\x96\x18@`\xc3\x15\n\'w\x15\xc0\x8aU\x06\xf5,]\xbe?\xaf\xc1s\xf3\xe9F\xf2?3\xccl\x05\xa6S\xb8?\x13\xa4$\x197\xbd\xed?\x8f1d=\xa3\xfb\x99?\xe3/.D\xcaG\xf6?\xdd<\xed\xce$f\xd5?\x86\x86\xf8\xa6b\xf9\xf3?Z\xa1\x03-Lf\x9f?l\xeb\x8b\xa5\x00\x18\xec?\xadk\xf7K\xb5\xd8v\xbf\xb0t\xbbd\xd8\x08\xf6?\x1fM\x0f\x15\x0c\xaf\xb7?\xed,\xf9\xef/<\xc7?i\x84k\xc7\xcf\xe2\xd0?\x0cU\xfeM\xc8\xff\xd2?\x84\x1b\xfc[@)\xb4?\x05\x028XV\xdb\xf0?l\x82\x89\xdd*)\xb4\xbf\xcd\xc0V.hh\xf1?J\xf5 \xce\x99\x01\xb7\xbf\xd2\x8b\x13\xc0\xd0Y\xf7??\x95\xb2\x98C\xe9\xcc?\xe1\xd4\xdd\xa4i\xaf\xe6?*\x8c\x05\xbeyP\xd7?\x89\xadv\x03\xb6C\xf6?S\x948\x0b\x8e\xe0\x9a?\xa8\x19Kyaw\xf0?\xbf\xc5\xa5\x87\xda\'+@\xa9B\x10\xc6M\xb8)\xc0\x86U\xceS\x17\xea\xa5?\xc4\x90\xd6\xda9\x89\xf3?\xfe\x98\x13g\x82)\xc7?\xf0\xf7M;\xdbG\xf0?\xb2\xfb\xb14A\x18\x99\xbf\xdb\x9f\x7f\t9\x00\xeb?\x9b\xcd2\xac\xf9J\xad?\x1b\xc0\x0fI0\xad\xeb?\xd2\x89W&\xe0\x98\x85\xbf\\T\xa4\xe5lV\xf1?\x03\xf8\x9a\xfa\xe1p\xb3?j2\xb5(\xe1\x96\xf1?\xeb\xc0\x9a,dn\xd7?&\x13\x91\xff\x0er\xe2?\x85\xa8\xf9\xd2X\xc7\xa4\xbfq\xe6\xf6\x8e \x8f\xf3?z\x10\x8b\xc3\xd7A\xd4\xbf\x07\x18H\x81\x80c\xf4?\xfe\xe5\x7f\xde39\xa2?\x9d\x89\x1c\xd1\xd8A\xf1?5\x07\xae\x93\xb2\xe9\xc4?\xcb\xe5\xd3HOK\xec?\x0b\x926\xec\x07g\xc3?\xe49\x84\x98\x1c\x10\xf9?l1\xa9=\x9c\x83\xc7?\x9eh\xbb\xd8\x84_\xf1?\x8b\x14G/\xe0\x8ch?>u\x04\x13.1\xf3?\x8b\x81*\x16\x16\x9cF?\x06 \x8d\xd1\xceK\xf1?\x06\x1a\xae:/\xdd\xb5?\'\xae6LS8\xf9?\xd4\x82\x9f\xfarB\xd7?\xa7Q\xe9\x1e{ \xf0?V\xf0y\xf2\xa5\xbf\xdc?p\x91\x13Z\xad\xe9\x00@]\xb8p\x84\xf8\t\xac?\x1e\x15[\xc1\x18\n\xef?\xdd\xf69\x93\xfe\x9d\xb5\xbf\xa9\xf9\xfc\xd7\xcaX\xf0?\xe4NU\xe2\xd1\x80\xbd?\xab\xc7odmv\xef?:\xb1-l\xaa\xdc\x89\xbf\x91\xfd\xc3\x8f\xd6o\xef?[$\xda\xcb\\J\x91?\xa8_\xf8{h}\xf2?x\xf6\xc3\xd7\xf6\x96\xb2\xbf\xa8"\xa3\xebg\xca\xf5?\xb7Ja\xf2z\xa5\xe1?\x82\xc2\xb2\xb4\x83\x04\xe2?'
p87
tp88
baa(lp89
g2
(g3
(I0
tp90
g5
tp91
Rp92
(I1
(I2
I64
tp93
g12
I01
S'\xc4\xfcC\xc9\xe0j\x98\xbc\xfc\xff\xff\xff\xff\xff\xef?\xc4\xfcC\xc9\xe0j\x98\xbc\xfc\xff\xff\xff\xff\xff\xef?\xc4\xfcC\xc9\xe0j\x98\xbc\xfc\xff\xff\xff\xff\xff\xef?\xc4\xfcC\xc9\xe0j\x98\xbc\xfc\xff\xff\xff\xff\xff\xef?\xc4\xfcC\xc9\xe0j\x98\xbc\xfc\xff\xff\xff\xff\xff\xef?\xc4\xfcC\xc9\xe0j\x98\xbc\xfc\xff\xff\xff\xff\xff\xef?\xc4\xfcC\xc9\xe0j\x98\xbc\xfc\xff\xff\xff\xff\xff\xef?\xc4\xfcC\xc9\xe0j\x98\xbc\xfc\xff\xff\xff\xff\xff\xef?\xc4\xfcC\xc9\xe0j\x98\xbc\xfc\xff\xff\xff\xff\xff\xef?\xc4\xfcC\xc9\xe0j\x98\xbc\xfc\xff\xff\xff\xff\xff\xef?\xc4\xfcC\xc9\xe0j\x98\xbc\xfc\xff\xff\xff\xff\xff\xef?\xc4\xfcC\xc9\xe0j\x98\xbc\xfc\xff\xff\xff\xff\xff\xef?\xc4\xfcC\xc9\xe0j\x98\xbc\xfc\xff\xff\xff\xff\xff\xef?\xc4\xfcC\xc9\xe0j\x98\xbc\xfc\xff\xff\xff\xff\xff\xef?\xc4\xfcC\xc9\xe0j\x98\xbc\xfc\xff\xff\xff\xff\xff\xef?\xc4\xfcC\xc9\xe0j\x98\xbc\xfc\xff\xff\xff\xff\xff\xef?\xc4\xfcC\xc9\xe0j\x98\xbc\xfc\xff\xff\xff\xff\xff\xef?\xc4\xfcC\xc9\xe0j\x98\xbc\xfc\xff\xff\xff\xff\xff\xef?\xc4\xfcC\xc9\xe0j\x98\xbc\xfc\xff\xff\xff\xff\xff\xef?\xc4\xfcC\xc9\xe0j\x98\xbc\xfc\xff\xff\xff\xff\xff\xef?\xc4\xfcC\xc9\xe0j\x98\xbc\xfc\xff\xff\xff\xff\xff\xef?\xc4\xfcC\xc9\xe0j\x98\xbc\xfc\xff\xff\xff\xff\xff\xef?\xc4\xfcC\xc9\xe0j\x98\xbc\xfc\xff\xff\xff\xff\xff\xef?\xc4\xfcC\xc9\xe0j\x98\xbc\xfc\xff\xff\xff\xff\xff\xef?\xc4\xfcC\xc9\xe0j\x98\xbc\xfc\xff\xff\xff\xff\xff\xef?\xc4\xfcC\xc9\xe0j\x98\xbc\xfc\xff\xff\xff\xff\xff\xef?\xc4\xfcC\xc9\xe0j\x98\xbc\xfc\xff\xff\xff\xff\xff\xef?\xc4\xfcC\xc9\xe0j\x98\xbc\xfc\xff\xff\xff\xff\xff\xef?\xc4\xfcC\xc9\xe0j\x98\xbc\xfc\xff\xff\xff\xff\xff\xef?\xc4\xfcC\xc9\xe0j\x98\xbc\xfc\xff\xff\xff\xff\xff\xef?\xc4\xfcC\xc9\xe0j\x98\xbc\xfc\xff\xff\xff\xff\xff\xef?\xc4\xfcC\xc9\xe0j\x98\xbc\xfc\xff\xff\xff\xff\xff\xef?\xc4\xfcC\xc9\xe0j\x98\xbc\xfc\xff\xff\xff\xff\xff\xef?\xc4\xfcC\xc9\xe0j\x98\xbc\xfc\xff\xff\xff\xff\xff\xef?\xc4\xfcC\xc9\xe0j\x98\xbc\xfc\xff\xff\xff\xff\xff\xef?\xc4\xfcC\xc9\xe0j\x98\xbc\xfc\xff\xff\xff\xff\xff\xef?\xc4\xfcC\xc9\xe0j\x98\xbc\xfc\xff\xff\xff\xff\xff\xef?\xc4\xfcC\xc9\xe0j\x98\xbc\xfc\xff\xff\xff\xff\xff\xef?\xc4\xfcC\xc9\xe0j\x98\xbc\xfc\xff\xff\xff\xff\xff\xef?\xc4\xfcC\xc9\xe0j\x98\xbc\xfc\xff\xff\xff\xff\xff\xef?\xc4\xfcC\xc9\xe0j\x98\xbc\xfc\xff\xff\xff\xff\xff\xef?\xc4\xfcC\xc9\xe0j\x98\xbc\xfc\xff\xff\xff\xff\xff\xef?\xc4\xfcC\xc9\xe0j\x98\xbc\xfc\xff\xff\xff\xff\xff\xef?\xc4\xfcC\xc9\xe0j\x98\xbc\xfc\xff\xff\xff\xff\xff\xef?\xc4\xfcC\xc9\xe0j\x98\xbc\xfc\xff\xff\xff\xff\xff\xef?\xc4\xfcC\xc9\xe0j\x98\xbc\xfc\xff\xff\xff\xff\xff\xef?\xc4\xfcC\xc9\xe0j\x98\xbc\xfc\xff\xff\xff\xff\xff\xef?\xc4\xfcC\xc9\xe0j\x98\xbc\xfc\xff\xff\xff\xff\xff\xef?\xc4\xfcC\xc9\xe0j\x98\xbc\xfc\xff\xff\xff\xff\xff\xef?\xc4\xfcC\xc9\xe0j\x98\xbc\xfc\xff\xff\xff\xff\xff\xef?\xc4\xfcC\xc9\xe0j\x98\xbc\xfc\xff\xff\xff\xff\xff\xef?\xc4\xfcC\xc9\xe0j\x98\xbc\xfc\xff\xff\xff\xff\xff\xef?\xc4\xfcC\xc9\xe0j\x98\xbc\xfc\xff\xff\xff\xff\xff\xef?\xc4\xfcC\xc9\xe0j\x98\xbc\xfc\xff\xff\xff\xff\xff\xef?\xc4\xfcC\xc9\xe0j\x98\xbc\xfc\xff\xff\xff\xff\xff\xef?\xc4\xfcC\xc9\xe0j\x98\xbc\xfc\xff\xff\xff\xff\xff\xef?\xc4\xfcC\xc9\xe0j\x98\xbc\xfc\xff\xff\xff\xff\xff\xef?\xc4\xfcC\xc9\xe0j\x98\xbc\xfc\xff\xff\xff\xff\xff\xef?\xc4\xfcC\xc9\xe0j\x98\xbc\xfc\xff\xff\xff\xff\xff\xef?\xc4\xfcC\xc9\xe0j\x98\xbc\xfc\xff\xff\xff\xff\xff\xef?\xc4\xfcC\xc9\xe0j\x98\xbc\xfc\xff\xff\xff\xff\xff\xef?\xc4\xfcC\xc9\xe0j\x98\xbc\xfc\xff\xff\xff\xff\xff\xef?\xc4\xfcC\xc9\xe0j\x98\xbc\xfc\xff\xff\xff\xff\xff\xef?\xc4\xfcC\xc9\xe0j\x98\xbc\xfc\xff\xff\xff\xff\xff\xef?'
p94
tp95
bag2
(g3
(I0
tp96
g5
tp97
Rp98
(I1
(I2
I64
tp99
g12
I01
S'\xc4\xfcC\xc9\xe0j\x98\xbc\xfc\xff\xff\xff\xff\xff\xef?\xc4\xfcC\xc9\xe0j\x98\xbc\xfc\xff\xff\xff\xff\xff\xef?\xc4\xfcC\xc9\xe0j\x98\xbc\xfc\xff\xff\xff\xff\xff\xef?\xc4\xfcC\xc9\xe0j\x98\xbc\xfc\xff\xff\xff\xff\xff\xef?\xc4\xfcC\xc9\xe0j\x98\xbc\xfc\xff\xff\xff\xff\xff\xef?\xc4\xfcC\xc9\xe0j\x98\xbc\xfc\xff\xff\xff\xff\xff\xef?\xc4\xfcC\xc9\xe0j\x98\xbc\xfc\xff\xff\xff\xff\xff\xef?\xc4\xfcC\xc9\xe0j\x98\xbc\xfc\xff\xff\xff\xff\xff\xef?\xc4\xfcC\xc9\xe0j\x98\xbc\xfc\xff\xff\xff\xff\xff\xef?\xc4\xfcC\xc9\xe0j\x98\xbc\xfc\xff\xff\xff\xff\xff\xef?\xc4\xfcC\xc9\xe0j\x98\xbc\xfc\xff\xff\xff\xff\xff\xef?\xc4\xfcC\xc9\xe0j\x98\xbc\xfc\xff\xff\xff\xff\xff\xef?\xc4\xfcC\xc9\xe0j\x98\xbc\xfc\xff\xff\xff\xff\xff\xef?\xc4\xfcC\xc9\xe0j\x98\xbc\xfc\xff\xff\xff\xff\xff\xef?\xc4\xfcC\xc9\xe0j\x98\xbc\xfc\xff\xff\xff\xff\xff\xef?\xc4\xfcC\xc9\xe0j\x98\xbc\xfc\xff\xff\xff\xff\xff\xef?\xc4\xfcC\xc9\xe0j\x98\xbc\xfc\xff\xff\xff\xff\xff\xef?\xc4\xfcC\xc9\xe0j\x98\xbc\xfc\xff\xff\xff\xff\xff\xef?\xc4\xfcC\xc9\xe0j\x98\xbc\xfc\xff\xff\xff\xff\xff\xef?\xc4\xfcC\xc9\xe0j\x98\xbc\xfc\xff\xff\xff\xff\xff\xef?\xc4\xfcC\xc9\xe0j\x98\xbc\xfc\xff\xff\xff\xff\xff\xef?\xc4\xfcC\xc9\xe0j\x98\xbc\xfc\xff\xff\xff\xff\xff\xef?\xc4\xfcC\xc9\xe0j\x98\xbc\xfc\xff\xff\xff\xff\xff\xef?\xc4\xfcC\xc9\xe0j\x98\xbc\xfc\xff\xff\xff\xff\xff\xef?\xc4\xfcC\xc9\xe0j\x98\xbc\xfc\xff\xff\xff\xff\xff\xef?\xc4\xfcC\xc9\xe0j\x98\xbc\xfc\xff\xff\xff\xff\xff\xef?\xc4\xfcC\xc9\xe0j\x98\xbc\xfc\xff\xff\xff\xff\xff\xef?\xc4\xfcC\xc9\xe0j\x98\xbc\xfc\xff\xff\xff\xff\xff\xef?\xc4\xfcC\xc9\xe0j\x98\xbc\xfc\xff\xff\xff\xff\xff\xef?\xc4\xfcC\xc9\xe0j\x98\xbc\xfc\xff\xff\xff\xff\xff\xef?\xc4\xfcC\xc9\xe0j\x98\xbc\xfc\xff\xff\xff\xff\xff\xef?\xc4\xfcC\xc9\xe0j\x98\xbc\xfc\xff\xff\xff\xff\xff\xef?\xc4\xfcC\xc9\xe0j\x98\xbc\xfc\xff\xff\xff\xff\xff\xef?\xc4\xfcC\xc9\xe0j\x98\xbc\xfc\xff\xff\xff\xff\xff\xef?\xc4\xfcC\xc9\xe0j\x98\xbc\xfc\xff\xff\xff\xff\xff\xef?\xc4\xfcC\xc9\xe0j\x98\xbc\xfc\xff\xff\xff\xff\xff\xef?\xc4\xfcC\xc9\xe0j\x98\xbc\xfc\xff\xff\xff\xff\xff\xef?\xc4\xfcC\xc9\xe0j\x98\xbc\xfc\xff\xff\xff\xff\xff\xef?\xc4\xfcC\xc9\xe0j\x98\xbc\xfc\xff\xff\xff\xff\xff\xef?\xc4\xfcC\xc9\xe0j\x98\xbc\xfc\xff\xff\xff\xff\xff\xef?\xc4\xfcC\xc9\xe0j\x98\xbc\xfc\xff\xff\xff\xff\xff\xef?\xc4\xfcC\xc9\xe0j\x98\xbc\xfc\xff\xff\xff\xff\xff\xef?\xc4\xfcC\xc9\xe0j\x98\xbc\xfc\xff\xff\xff\xff\xff\xef?\xc4\xfcC\xc9\xe0j\x98\xbc\xfc\xff\xff\xff\xff\xff\xef?\xc4\xfcC\xc9\xe0j\x98\xbc\xfc\xff\xff\xff\xff\xff\xef?\xc4\xfcC\xc9\xe0j\x98\xbc\xfc\xff\xff\xff\xff\xff\xef?\xc4\xfcC\xc9\xe0j\x98\xbc\xfc\xff\xff\xff\xff\xff\xef?\xc4\xfcC\xc9\xe0j\x98\xbc\xfc\xff\xff\xff\xff\xff\xef?\xc4\xfcC\xc9\xe0j\x98\xbc\xfc\xff\xff\xff\xff\xff\xef?\xc4\xfcC\xc9\xe0j\x98\xbc\xfc\xff\xff\xff\xff\xff\xef?\xc4\xfcC\xc9\xe0j\x98\xbc\xfc\xff\xff\xff\xff\xff\xef?\xc4\xfcC\xc9\xe0j\x98\xbc\xfc\xff\xff\xff\xff\xff\xef?\xc4\xfcC\xc9\xe0j\x98\xbc\xfc\xff\xff\xff\xff\xff\xef?\xc4\xfcC\xc9\xe0j\x98\xbc\xfc\xff\xff\xff\xff\xff\xef?\xc4\xfcC\xc9\xe0j\x98\xbc\xfc\xff\xff\xff\xff\xff\xef?\xc4\xfcC\xc9\xe0j\x98\xbc\xfc\xff\xff\xff\xff\xff\xef?\xc4\xfcC\xc9\xe0j\x98\xbc\xfc\xff\xff\xff\xff\xff\xef?\xc4\xfcC\xc9\xe0j\x98\xbc\xfc\xff\xff\xff\xff\xff\xef?\xc4\xfcC\xc9\xe0j\x98\xbc\xfc\xff\xff\xff\xff\xff\xef?\xc4\xfcC\xc9\xe0j\x98\xbc\xfc\xff\xff\xff\xff\xff\xef?\xc4\xfcC\xc9\xe0j\x98\xbc\xfc\xff\xff\xff\xff\xff\xef?\xc4\xfcC\xc9\xe0j\x98\xbc\xfc\xff\xff\xff\xff\xff\xef?\xc4\xfcC\xc9\xe0j\x98\xbc\xfc\xff\xff\xff\xff\xff\xef?\xc4\xfcC\xc9\xe0j\x98\xbc\xfc\xff\xff\xff\xff\xff\xef?'
p100
tp101
bag2
(g3
(I0
tp102
g5
tp103
Rp104
(I1
(I2
I128
tp105
g12
I01
S'\xc4\xfcC\xc9\xe0j\x98\xbc\xfc\xff\xff\xff\xff\xff\xef?\xc4\xfcC\xc9\xe0j\x98\xbc\xfc\xff\xff\xff\xff\xff\xef?\xc4\xfcC\xc9\xe0j\x98\xbc\xfc\xff\xff\xff\xff\xff\xef?\xc4\xfcC\xc9\xe0j\x98\xbc\xfc\xff\xff\xff\xff\xff\xef?\xc4\xfcC\xc9\xe0j\x98\xbc\xfc\xff\xff\xff\xff\xff\xef?\xc4\xfcC\xc9\xe0j\x98\xbc\xfc\xff\xff\xff\xff\xff\xef?\xc4\xfcC\xc9\xe0j\x98\xbc\xfc\xff\xff\xff\xff\xff\xef?\xc4\xfcC\xc9\xe0j\x98\xbc\xfc\xff\xff\xff\xff\xff\xef?\xc4\xfcC\xc9\xe0j\x98\xbc\xfc\xff\xff\xff\xff\xff\xef?\xc4\xfcC\xc9\xe0j\x98\xbc\xfc\xff\xff\xff\xff\xff\xef?\xc4\xfcC\xc9\xe0j\x98\xbc\xfc\xff\xff\xff\xff\xff\xef?\xc4\xfcC\xc9\xe0j\x98\xbc\xfc\xff\xff\xff\xff\xff\xef?\xc4\xfcC\xc9\xe0j\x98\xbc\xfc\xff\xff\xff\xff\xff\xef?\xc4\xfcC\xc9\xe0j\x98\xbc\xfc\xff\xff\xff\xff\xff\xef?\xc4\xfcC\xc9\xe0j\x98\xbc\xfc\xff\xff\xff\xff\xff\xef?\xc4\xfcC\xc9\xe0j\x98\xbc\xfc\xff\xff\xff\xff\xff\xef?\xc4\xfcC\xc9\xe0j\x98\xbc\xfc\xff\xff\xff\xff\xff\xef?\xc4\xfcC\xc9\xe0j\x98\xbc\xfc\xff\xff\xff\xff\xff\xef?\xc4\xfcC\xc9\xe0j\x98\xbc\xfc\xff\xff\xff\xff\xff\xef?\xc4\xfcC\xc9\xe0j\x98\xbc\xfc\xff\xff\xff\xff\xff\xef?\xc4\xfcC\xc9\xe0j\x98\xbc\xfc\xff\xff\xff\xff\xff\xef?\xc4\xfcC\xc9\xe0j\x98\xbc\xfc\xff\xff\xff\xff\xff\xef?\xc4\xfcC\xc9\xe0j\x98\xbc\xfc\xff\xff\xff\xff\xff\xef?\xc4\xfcC\xc9\xe0j\x98\xbc\xfc\xff\xff\xff\xff\xff\xef?\xc4\xfcC\xc9\xe0j\x98\xbc\xfc\xff\xff\xff\xff\xff\xef?\xc4\xfcC\xc9\xe0j\x98\xbc\xfc\xff\xff\xff\xff\xff\xef?\xc4\xfcC\xc9\xe0j\x98\xbc\xfc\xff\xff\xff\xff\xff\xef?\xc4\xfcC\xc9\xe0j\x98\xbc\xfc\xff\xff\xff\xff\xff\xef?\xc4\xfcC\xc9\xe0j\x98\xbc\xfc\xff\xff\xff\xff\xff\xef?\xc4\xfcC\xc9\xe0j\x98\xbc\xfc\xff\xff\xff\xff\xff\xef?\xc4\xfcC\xc9\xe0j\x98\xbc\xfc\xff\xff\xff\xff\xff\xef?\xc4\xfcC\xc9\xe0j\x98\xbc\xfc\xff\xff\xff\xff\xff\xef?\xc4\xfcC\xc9\xe0j\x98\xbc\xfc\xff\xff\xff\xff\xff\xef?\xc4\xfcC\xc9\xe0j\x98\xbc\xfc\xff\xff\xff\xff\xff\xef?\xc4\xfcC\xc9\xe0j\x98\xbc\xfc\xff\xff\xff\xff\xff\xef?\xc4\xfcC\xc9\xe0j\x98\xbc\xfc\xff\xff\xff\xff\xff\xef?\xc4\xfcC\xc9\xe0j\x98\xbc\xfc\xff\xff\xff\xff\xff\xef?\xc4\xfcC\xc9\xe0j\x98\xbc\xfc\xff\xff\xff\xff\xff\xef?\xc4\xfcC\xc9\xe0j\x98\xbc\xfc\xff\xff\xff\xff\xff\xef?\xc4\xfcC\xc9\xe0j\x98\xbc\xfc\xff\xff\xff\xff\xff\xef?\xc4\xfcC\xc9\xe0j\x98\xbc\xfc\xff\xff\xff\xff\xff\xef?\xc4\xfcC\xc9\xe0j\x98\xbc\xfc\xff\xff\xff\xff\xff\xef?\xc4\xfcC\xc9\xe0j\x98\xbc\xfc\xff\xff\xff\xff\xff\xef?\xc4\xfcC\xc9\xe0j\x98\xbc\xfc\xff\xff\xff\xff\xff\xef?\xc4\xfcC\xc9\xe0j\x98\xbc\xfc\xff\xff\xff\xff\xff\xef?\xc4\xfcC\xc9\xe0j\x98\xbc\xfc\xff\xff\xff\xff\xff\xef?\xc4\xfcC\xc9\xe0j\x98\xbc\xfc\xff\xff\xff\xff\xff\xef?\xc4\xfcC\xc9\xe0j\x98\xbc\xfc\xff\xff\xff\xff\xff\xef?\xc4\xfcC\xc9\xe0j\x98\xbc\xfc\xff\xff\xff\xff\xff\xef?\xc4\xfcC\xc9\xe0j\x98\xbc\xfc\xff\xff\xff\xff\xff\xef?\xc4\xfcC\xc9\xe0j\x98\xbc\xfc\xff\xff\xff\xff\xff\xef?\xc4\xfcC\xc9\xe0j\x98\xbc\xfc\xff\xff\xff\xff\xff\xef?\xc4\xfcC\xc9\xe0j\x98\xbc\xfc\xff\xff\xff\xff\xff\xef?\xc4\xfcC\xc9\xe0j\x98\xbc\xfc\xff\xff\xff\xff\xff\xef?\xc4\xfcC\xc9\xe0j\x98\xbc\xfc\xff\xff\xff\xff\xff\xef?\xc4\xfcC\xc9\xe0j\x98\xbc\xfc\xff\xff\xff\xff\xff\xef?\xc4\xfcC\xc9\xe0j\x98\xbc\xfc\xff\xff\xff\xff\xff\xef?\xc4\xfcC\xc9\xe0j\x98\xbc\xfc\xff\xff\xff\xff\xff\xef?\xc4\xfcC\xc9\xe0j\x98\xbc\xfc\xff\xff\xff\xff\xff\xef?\xc4\xfcC\xc9\xe0j\x98\xbc\xfc\xff\xff\xff\xff\xff\xef?\xc4\xfcC\xc9\xe0j\x98\xbc\xfc\xff\xff\xff\xff\xff\xef?\xc4\xfcC\xc9\xe0j\x98\xbc\xfc\xff\xff\xff\xff\xff\xef?\xc4\xfcC\xc9\xe0j\x98\xbc\xfc\xff\xff\xff\xff\xff\xef?\xc4\xfcC\xc9\xe0j\x98\xbc\xfc\xff\xff\xff\xff\xff\xef?\xc4\xfcC\xc9\xe0j\x98\xbc\xfc\xff\xff\xff\xff\xff\xef?\xc4\xfcC\xc9\xe0j\x98\xbc\xfc\xff\xff\xff\xff\xff\xef?\xc4\xfcC\xc9\xe0j\x98\xbc\xfc\xff\xff\xff\xff\xff\xef?\xc4\xfcC\xc9\xe0j\x98\xbc\xfc\xff\xff\xff\xff\xff\xef?\xc4\xfcC\xc9\xe0j\x98\xbc\xfc\xff\xff\xff\xff\xff\xef?\xc4\xfcC\xc9\xe0j\x98\xbc\xfc\xff\xff\xff\xff\xff\xef?\xc4\xfcC\xc9\xe0j\x98\xbc\xfc\xff\xff\xff\xff\xff\xef?\xc4\xfcC\xc9\xe0j\x98\xbc\xfc\xff\xff\xff\xff\xff\xef?\xc4\xfcC\xc9\xe0j\x98\xbc\xfc\xff\xff\xff\xff\xff\xef?\xc4\xfcC\xc9\xe0j\x98\xbc\xfc\xff\xff\xff\xff\xff\xef?\xc4\xfcC\xc9\xe0j\x98\xbc\xfc\xff\xff\xff\xff\xff\xef?\xc4\xfcC\xc9\xe0j\x98\xbc\xfc\xff\xff\xff\xff\xff\xef?\xc4\xfcC\xc9\xe0j\x98\xbc\xfc\xff\xff\xff\xff\xff\xef?\xc4\xfcC\xc9\xe0j\x98\xbc\xfc\xff\xff\xff\xff\xff\xef?\xc4\xfcC\xc9\xe0j\x98\xbc\xfc\xff\xff\xff\xff\xff\xef?\xc4\xfcC\xc9\xe0j\x98\xbc\xfc\xff\xff\xff\xff\xff\xef?\xc4\xfcC\xc9\xe0j\x98\xbc\xfc\xff\xff\xff\xff\xff\xef?\xc4\xfcC\xc9\xe0j\x98\xbc\xfc\xff\xff\xff\xff\xff\xef?\xc4\xfcC\xc9\xe0j\x98\xbc\xfc\xff\xff\xff\xff\xff\xef?\xc4\xfcC\xc9\xe0j\x98\xbc\xfc\xff\xff\xff\xff\xff\xef?\xc4\xfcC\xc9\xe0j\x98\xbc\xfc\xff\xff\xff\xff\xff\xef?\xc4\xfcC\xc9\xe0j\x98\xbc\xfc\xff\xff\xff\xff\xff\xef?\xc4\xfcC\xc9\xe0j\x98\xbc\xfc\xff\xff\xff\xff\xff\xef?\xc4\xfcC\xc9\xe0j\x98\xbc\xfc\xff\xff\xff\xff\xff\xef?\xc4\xfcC\xc9\xe0j\x98\xbc\xfc\xff\xff\xff\xff\xff\xef?\xc4\xfcC\xc9\xe0j\x98\xbc\xfc\xff\xff\xff\xff\xff\xef?\xc4\xfcC\xc9\xe0j\x98\xbc\xfc\xff\xff\xff\xff\xff\xef?\xc4\xfcC\xc9\xe0j\x98\xbc\xfc\xff\xff\xff\xff\xff\xef?\xc4\xfcC\xc9\xe0j\x98\xbc\xfc\xff\xff\xff\xff\xff\xef?\xc4\xfcC\xc9\xe0j\x98\xbc\xfc\xff\xff\xff\xff\xff\xef?\xc4\xfcC\xc9\xe0j\x98\xbc\xfc\xff\xff\xff\xff\xff\xef?\xc4\xfcC\xc9\xe0j\x98\xbc\xfc\xff\xff\xff\xff\xff\xef?\xc4\xfcC\xc9\xe0j\x98\xbc\xfc\xff\xff\xff\xff\xff\xef?\xc4\xfcC\xc9\xe0j\x98\xbc\xfc\xff\xff\xff\xff\xff\xef?\xc4\xfcC\xc9\xe0j\x98\xbc\xfc\xff\xff\xff\xff\xff\xef?\xc4\xfcC\xc9\xe0j\x98\xbc\xfc\xff\xff\xff\xff\xff\xef?\xc4\xfcC\xc9\xe0j\x98\xbc\xfc\xff\xff\xff\xff\xff\xef?\xc4\xfcC\xc9\xe0j\x98\xbc\xfc\xff\xff\xff\xff\xff\xef?\xc4\xfcC\xc9\xe0j\x98\xbc\xfc\xff\xff\xff\xff\xff\xef?\xc4\xfcC\xc9\xe0j\x98\xbc\xfc\xff\xff\xff\xff\xff\xef?\xc4\xfcC\xc9\xe0j\x98\xbc\xfc\xff\xff\xff\xff\xff\xef?\xc4\xfcC\xc9\xe0j\x98\xbc\xfc\xff\xff\xff\xff\xff\xef?\xc4\xfcC\xc9\xe0j\x98\xbc\xfc\xff\xff\xff\xff\xff\xef?\xc4\xfcC\xc9\xe0j\x98\xbc\xfc\xff\xff\xff\xff\xff\xef?\xc4\xfcC\xc9\xe0j\x98\xbc\xfc\xff\xff\xff\xff\xff\xef?\xc4\xfcC\xc9\xe0j\x98\xbc\xfc\xff\xff\xff\xff\xff\xef?\xc4\xfcC\xc9\xe0j\x98\xbc\xfc\xff\xff\xff\xff\xff\xef?\xc4\xfcC\xc9\xe0j\x98\xbc\xfc\xff\xff\xff\xff\xff\xef?\xc4\xfcC\xc9\xe0j\x98\xbc\xfc\xff\xff\xff\xff\xff\xef?\xc4\xfcC\xc9\xe0j\x98\xbc\xfc\xff\xff\xff\xff\xff\xef?\xc4\xfcC\xc9\xe0j\x98\xbc\xfc\xff\xff\xff\xff\xff\xef?\xc4\xfcC\xc9\xe0j\x98\xbc\xfc\xff\xff\xff\xff\xff\xef?\xc4\xfcC\xc9\xe0j\x98\xbc\xfc\xff\xff\xff\xff\xff\xef?\xc4\xfcC\xc9\xe0j\x98\xbc\xfc\xff\xff\xff\xff\xff\xef?\xc4\xfcC\xc9\xe0j\x98\xbc\xfc\xff\xff\xff\xff\xff\xef?\xc4\xfcC\xc9\xe0j\x98\xbc\xfc\xff\xff\xff\xff\xff\xef?\xc4\xfcC\xc9\xe0j\x98\xbc\xfc\xff\xff\xff\xff\xff\xef?\xc4\xfcC\xc9\xe0j\x98\xbc\xfc\xff\xff\xff\xff\xff\xef?\xc4\xfcC\xc9\xe0j\x98\xbc\xfc\xff\xff\xff\xff\xff\xef?\xc4\xfcC\xc9\xe0j\x98\xbc\xfc\xff\xff\xff\xff\xff\xef?\xc4\xfcC\xc9\xe0j\x98\xbc\xfc\xff\xff\xff\xff\xff\xef?\xc4\xfcC\xc9\xe0j\x98\xbc\xfc\xff\xff\xff\xff\xff\xef?\xc4\xfcC\xc9\xe0j\x98\xbc\xfc\xff\xff\xff\xff\xff\xef?\xc4\xfcC\xc9\xe0j\x98\xbc\xfc\xff\xff\xff\xff\xff\xef?'
p106
tp107
bag2
(g3
(I0
tp108
g5
tp109
Rp110
(I1
(I2
I128
tp111
g12
I01
S'\xc4\xfcC\xc9\xe0j\x98\xbc\xfc\xff\xff\xff\xff\xff\xef?\xc4\xfcC\xc9\xe0j\x98\xbc\xfc\xff\xff\xff\xff\xff\xef?\xc4\xfcC\xc9\xe0j\x98\xbc\xfc\xff\xff\xff\xff\xff\xef?\xc4\xfcC\xc9\xe0j\x98\xbc\xfc\xff\xff\xff\xff\xff\xef?\xc4\xfcC\xc9\xe0j\x98\xbc\xfc\xff\xff\xff\xff\xff\xef?\xc4\xfcC\xc9\xe0j\x98\xbc\xfc\xff\xff\xff\xff\xff\xef?\xc4\xfcC\xc9\xe0j\x98\xbc\xfc\xff\xff\xff\xff\xff\xef?\xc4\xfcC\xc9\xe0j\x98\xbc\xfc\xff\xff\xff\xff\xff\xef?\xc4\xfcC\xc9\xe0j\x98\xbc\xfc\xff\xff\xff\xff\xff\xef?\xc4\xfcC\xc9\xe0j\x98\xbc\xfc\xff\xff\xff\xff\xff\xef?\xc4\xfcC\xc9\xe0j\x98\xbc\xfc\xff\xff\xff\xff\xff\xef?\xc4\xfcC\xc9\xe0j\x98\xbc\xfc\xff\xff\xff\xff\xff\xef?\xc4\xfcC\xc9\xe0j\x98\xbc\xfc\xff\xff\xff\xff\xff\xef?\xc4\xfcC\xc9\xe0j\x98\xbc\xfc\xff\xff\xff\xff\xff\xef?\xc4\xfcC\xc9\xe0j\x98\xbc\xfc\xff\xff\xff\xff\xff\xef?\xc4\xfcC\xc9\xe0j\x98\xbc\xfc\xff\xff\xff\xff\xff\xef?\xc4\xfcC\xc9\xe0j\x98\xbc\xfc\xff\xff\xff\xff\xff\xef?\xc4\xfcC\xc9\xe0j\x98\xbc\xfc\xff\xff\xff\xff\xff\xef?\xc4\xfcC\xc9\xe0j\x98\xbc\xfc\xff\xff\xff\xff\xff\xef?\xc4\xfcC\xc9\xe0j\x98\xbc\xfc\xff\xff\xff\xff\xff\xef?\xc4\xfcC\xc9\xe0j\x98\xbc\xfc\xff\xff\xff\xff\xff\xef?\xc4\xfcC\xc9\xe0j\x98\xbc\xfc\xff\xff\xff\xff\xff\xef?\xc4\xfcC\xc9\xe0j\x98\xbc\xfc\xff\xff\xff\xff\xff\xef?\xc4\xfcC\xc9\xe0j\x98\xbc\xfc\xff\xff\xff\xff\xff\xef?\xc4\xfcC\xc9\xe0j\x98\xbc\xfc\xff\xff\xff\xff\xff\xef?\xc4\xfcC\xc9\xe0j\x98\xbc\xfc\xff\xff\xff\xff\xff\xef?\xc4\xfcC\xc9\xe0j\x98\xbc\xfc\xff\xff\xff\xff\xff\xef?\xc4\xfcC\xc9\xe0j\x98\xbc\xfc\xff\xff\xff\xff\xff\xef?\xc4\xfcC\xc9\xe0j\x98\xbc\xfc\xff\xff\xff\xff\xff\xef?\xc4\xfcC\xc9\xe0j\x98\xbc\xfc\xff\xff\xff\xff\xff\xef?\xc4\xfcC\xc9\xe0j\x98\xbc\xfc\xff\xff\xff\xff\xff\xef?\xc4\xfcC\xc9\xe0j\x98\xbc\xfc\xff\xff\xff\xff\xff\xef?\xc4\xfcC\xc9\xe0j\x98\xbc\xfc\xff\xff\xff\xff\xff\xef?\xc4\xfcC\xc9\xe0j\x98\xbc\xfc\xff\xff\xff\xff\xff\xef?\xc4\xfcC\xc9\xe0j\x98\xbc\xfc\xff\xff\xff\xff\xff\xef?\xc4\xfcC\xc9\xe0j\x98\xbc\xfc\xff\xff\xff\xff\xff\xef?\xc4\xfcC\xc9\xe0j\x98\xbc\xfc\xff\xff\xff\xff\xff\xef?\xc4\xfcC\xc9\xe0j\x98\xbc\xfc\xff\xff\xff\xff\xff\xef?\xc4\xfcC\xc9\xe0j\x98\xbc\xfc\xff\xff\xff\xff\xff\xef?\xc4\xfcC\xc9\xe0j\x98\xbc\xfc\xff\xff\xff\xff\xff\xef?\xc4\xfcC\xc9\xe0j\x98\xbc\xfc\xff\xff\xff\xff\xff\xef?\xc4\xfcC\xc9\xe0j\x98\xbc\xfc\xff\xff\xff\xff\xff\xef?\xc4\xfcC\xc9\xe0j\x98\xbc\xfc\xff\xff\xff\xff\xff\xef?\xc4\xfcC\xc9\xe0j\x98\xbc\xfc\xff\xff\xff\xff\xff\xef?\xc4\xfcC\xc9\xe0j\x98\xbc\xfc\xff\xff\xff\xff\xff\xef?\xc4\xfcC\xc9\xe0j\x98\xbc\xfc\xff\xff\xff\xff\xff\xef?\xc4\xfcC\xc9\xe0j\x98\xbc\xfc\xff\xff\xff\xff\xff\xef?\xc4\xfcC\xc9\xe0j\x98\xbc\xfc\xff\xff\xff\xff\xff\xef?\xc4\xfcC\xc9\xe0j\x98\xbc\xfc\xff\xff\xff\xff\xff\xef?\xc4\xfcC\xc9\xe0j\x98\xbc\xfc\xff\xff\xff\xff\xff\xef?\xc4\xfcC\xc9\xe0j\x98\xbc\xfc\xff\xff\xff\xff\xff\xef?\xc4\xfcC\xc9\xe0j\x98\xbc\xfc\xff\xff\xff\xff\xff\xef?\xc4\xfcC\xc9\xe0j\x98\xbc\xfc\xff\xff\xff\xff\xff\xef?\xc4\xfcC\xc9\xe0j\x98\xbc\xfc\xff\xff\xff\xff\xff\xef?\xc4\xfcC\xc9\xe0j\x98\xbc\xfc\xff\xff\xff\xff\xff\xef?\xc4\xfcC\xc9\xe0j\x98\xbc\xfc\xff\xff\xff\xff\xff\xef?\xc4\xfcC\xc9\xe0j\x98\xbc\xfc\xff\xff\xff\xff\xff\xef?\xc4\xfcC\xc9\xe0j\x98\xbc\xfc\xff\xff\xff\xff\xff\xef?\xc4\xfcC\xc9\xe0j\x98\xbc\xfc\xff\xff\xff\xff\xff\xef?\xc4\xfcC\xc9\xe0j\x98\xbc\xfc\xff\xff\xff\xff\xff\xef?\xc4\xfcC\xc9\xe0j\x98\xbc\xfc\xff\xff\xff\xff\xff\xef?\xc4\xfcC\xc9\xe0j\x98\xbc\xfc\xff\xff\xff\xff\xff\xef?\xc4\xfcC\xc9\xe0j\x98\xbc\xfc\xff\xff\xff\xff\xff\xef?\xc4\xfcC\xc9\xe0j\x98\xbc\xfc\xff\xff\xff\xff\xff\xef?\xc4\xfcC\xc9\xe0j\x98\xbc\xfc\xff\xff\xff\xff\xff\xef?\xc4\xfcC\xc9\xe0j\x98\xbc\xfc\xff\xff\xff\xff\xff\xef?\xc4\xfcC\xc9\xe0j\x98\xbc\xfc\xff\xff\xff\xff\xff\xef?\xc4\xfcC\xc9\xe0j\x98\xbc\xfc\xff\xff\xff\xff\xff\xef?\xc4\xfcC\xc9\xe0j\x98\xbc\xfc\xff\xff\xff\xff\xff\xef?\xc4\xfcC\xc9\xe0j\x98\xbc\xfc\xff\xff\xff\xff\xff\xef?\xc4\xfcC\xc9\xe0j\x98\xbc\xfc\xff\xff\xff\xff\xff\xef?\xc4\xfcC\xc9\xe0j\x98\xbc\xfc\xff\xff\xff\xff\xff\xef?\xc4\xfcC\xc9\xe0j\x98\xbc\xfc\xff\xff\xff\xff\xff\xef?\xc4\xfcC\xc9\xe0j\x98\xbc\xfc\xff\xff\xff\xff\xff\xef?\xc4\xfcC\xc9\xe0j\x98\xbc\xfc\xff\xff\xff\xff\xff\xef?\xc4\xfcC\xc9\xe0j\x98\xbc\xfc\xff\xff\xff\xff\xff\xef?\xc4\xfcC\xc9\xe0j\x98\xbc\xfc\xff\xff\xff\xff\xff\xef?\xc4\xfcC\xc9\xe0j\x98\xbc\xfc\xff\xff\xff\xff\xff\xef?\xc4\xfcC\xc9\xe0j\x98\xbc\xfc\xff\xff\xff\xff\xff\xef?\xc4\xfcC\xc9\xe0j\x98\xbc\xfc\xff\xff\xff\xff\xff\xef?\xc4\xfcC\xc9\xe0j\x98\xbc\xfc\xff\xff\xff\xff\xff\xef?\xc4\xfcC\xc9\xe0j\x98\xbc\xfc\xff\xff\xff\xff\xff\xef?\xc4\xfcC\xc9\xe0j\x98\xbc\xfc\xff\xff\xff\xff\xff\xef?\xc4\xfcC\xc9\xe0j\x98\xbc\xfc\xff\xff\xff\xff\xff\xef?\xc4\xfcC\xc9\xe0j\x98\xbc\xfc\xff\xff\xff\xff\xff\xef?\xc4\xfcC\xc9\xe0j\x98\xbc\xfc\xff\xff\xff\xff\xff\xef?\xc4\xfcC\xc9\xe0j\x98\xbc\xfc\xff\xff\xff\xff\xff\xef?\xc4\xfcC\xc9\xe0j\x98\xbc\xfc\xff\xff\xff\xff\xff\xef?\xc4\xfcC\xc9\xe0j\x98\xbc\xfc\xff\xff\xff\xff\xff\xef?\xc4\xfcC\xc9\xe0j\x98\xbc\xfc\xff\xff\xff\xff\xff\xef?\xc4\xfcC\xc9\xe0j\x98\xbc\xfc\xff\xff\xff\xff\xff\xef?\xc4\xfcC\xc9\xe0j\x98\xbc\xfc\xff\xff\xff\xff\xff\xef?\xc4\xfcC\xc9\xe0j\x98\xbc\xfc\xff\xff\xff\xff\xff\xef?\xc4\xfcC\xc9\xe0j\x98\xbc\xfc\xff\xff\xff\xff\xff\xef?\xc4\xfcC\xc9\xe0j\x98\xbc\xfc\xff\xff\xff\xff\xff\xef?\xc4\xfcC\xc9\xe0j\x98\xbc\xfc\xff\xff\xff\xff\xff\xef?\xc4\xfcC\xc9\xe0j\x98\xbc\xfc\xff\xff\xff\xff\xff\xef?\xc4\xfcC\xc9\xe0j\x98\xbc\xfc\xff\xff\xff\xff\xff\xef?\xc4\xfcC\xc9\xe0j\x98\xbc\xfc\xff\xff\xff\xff\xff\xef?\xc4\xfcC\xc9\xe0j\x98\xbc\xfc\xff\xff\xff\xff\xff\xef?\xc4\xfcC\xc9\xe0j\x98\xbc\xfc\xff\xff\xff\xff\xff\xef?\xc4\xfcC\xc9\xe0j\x98\xbc\xfc\xff\xff\xff\xff\xff\xef?\xc4\xfcC\xc9\xe0j\x98\xbc\xfc\xff\xff\xff\xff\xff\xef?\xc4\xfcC\xc9\xe0j\x98\xbc\xfc\xff\xff\xff\xff\xff\xef?\xc4\xfcC\xc9\xe0j\x98\xbc\xfc\xff\xff\xff\xff\xff\xef?\xc4\xfcC\xc9\xe0j\x98\xbc\xfc\xff\xff\xff\xff\xff\xef?\xc4\xfcC\xc9\xe0j\x98\xbc\xfc\xff\xff\xff\xff\xff\xef?\xc4\xfcC\xc9\xe0j\x98\xbc\xfc\xff\xff\xff\xff\xff\xef?\xc4\xfcC\xc9\xe0j\x98\xbc\xfc\xff\xff\xff\xff\xff\xef?\xc4\xfcC\xc9\xe0j\x98\xbc\xfc\xff\xff\xff\xff\xff\xef?\xc4\xfcC\xc9\xe0j\x98\xbc\xfc\xff\xff\xff\xff\xff\xef?\xc4\xfcC\xc9\xe0j\x98\xbc\xfc\xff\xff\xff\xff\xff\xef?\xc4\xfcC\xc9\xe0j\x98\xbc\xfc\xff\xff\xff\xff\xff\xef?\xc4\xfcC\xc9\xe0j\x98\xbc\xfc\xff\xff\xff\xff\xff\xef?\xc4\xfcC\xc9\xe0j\x98\xbc\xfc\xff\xff\xff\xff\xff\xef?\xc4\xfcC\xc9\xe0j\x98\xbc\xfc\xff\xff\xff\xff\xff\xef?\xc4\xfcC\xc9\xe0j\x98\xbc\xfc\xff\xff\xff\xff\xff\xef?\xc4\xfcC\xc9\xe0j\x98\xbc\xfc\xff\xff\xff\xff\xff\xef?\xc4\xfcC\xc9\xe0j\x98\xbc\xfc\xff\xff\xff\xff\xff\xef?\xc4\xfcC\xc9\xe0j\x98\xbc\xfc\xff\xff\xff\xff\xff\xef?\xc4\xfcC\xc9\xe0j\x98\xbc\xfc\xff\xff\xff\xff\xff\xef?\xc4\xfcC\xc9\xe0j\x98\xbc\xfc\xff\xff\xff\xff\xff\xef?\xc4\xfcC\xc9\xe0j\x98\xbc\xfc\xff\xff\xff\xff\xff\xef?\xc4\xfcC\xc9\xe0j\x98\xbc\xfc\xff\xff\xff\xff\xff\xef?\xc4\xfcC\xc9\xe0j\x98\xbc\xfc\xff\xff\xff\xff\xff\xef?\xc4\xfcC\xc9\xe0j\x98\xbc\xfc\xff\xff\xff\xff\xff\xef?\xc4\xfcC\xc9\xe0j\x98\xbc\xfc\xff\xff\xff\xff\xff\xef?\xc4\xfcC\xc9\xe0j\x98\xbc\xfc\xff\xff\xff\xff\xff\xef?'
p112
tp113
bag2
(g3
(I0
tp114
g5
tp115
Rp116
(I1
(I2
I247
tp117
g12
I01
S'\xc4\xfcC\xc9\xe0j\x98\xbc\xfc\xff\xff\xff\xff\xff\xef?\xc4\xfcC\xc9\xe0j\x98\xbc\xfc\xff\xff\xff\xff\xff\xef?\xc4\xfcC\xc9\xe0j\x98\xbc\xfc\xff\xff\xff\xff\xff\xef?\xc4\xfcC\xc9\xe0j\x98\xbc\xfc\xff\xff\xff\xff\xff\xef?\xc4\xfcC\xc9\xe0j\x98\xbc\xfc\xff\xff\xff\xff\xff\xef?\xc4\xfcC\xc9\xe0j\x98\xbc\xfc\xff\xff\xff\xff\xff\xef?\xc4\xfcC\xc9\xe0j\x98\xbc\xfc\xff\xff\xff\xff\xff\xef?\xc4\xfcC\xc9\xe0j\x98\xbc\xfc\xff\xff\xff\xff\xff\xef?\xc4\xfcC\xc9\xe0j\x98\xbc\xfc\xff\xff\xff\xff\xff\xef?\xc4\xfcC\xc9\xe0j\x98\xbc\xfc\xff\xff\xff\xff\xff\xef?\xc4\xfcC\xc9\xe0j\x98\xbc\xfc\xff\xff\xff\xff\xff\xef?\xc4\xfcC\xc9\xe0j\x98\xbc\xfc\xff\xff\xff\xff\xff\xef?\xc4\xfcC\xc9\xe0j\x98\xbc\xfc\xff\xff\xff\xff\xff\xef?\xc4\xfcC\xc9\xe0j\x98\xbc\xfc\xff\xff\xff\xff\xff\xef?\xc4\xfcC\xc9\xe0j\x98\xbc\xfc\xff\xff\xff\xff\xff\xef?\xc4\xfcC\xc9\xe0j\x98\xbc\xfc\xff\xff\xff\xff\xff\xef?\xc4\xfcC\xc9\xe0j\x98\xbc\xfc\xff\xff\xff\xff\xff\xef?\xc4\xfcC\xc9\xe0j\x98\xbc\xfc\xff\xff\xff\xff\xff\xef?\xc4\xfcC\xc9\xe0j\x98\xbc\xfc\xff\xff\xff\xff\xff\xef?\xc4\xfcC\xc9\xe0j\x98\xbc\xfc\xff\xff\xff\xff\xff\xef?\xc4\xfcC\xc9\xe0j\x98\xbc\xfc\xff\xff\xff\xff\xff\xef?\xc4\xfcC\xc9\xe0j\x98\xbc\xfc\xff\xff\xff\xff\xff\xef?\xc4\xfcC\xc9\xe0j\x98\xbc\xfc\xff\xff\xff\xff\xff\xef?\xc4\xfcC\xc9\xe0j\x98\xbc\xfc\xff\xff\xff\xff\xff\xef?\xc4\xfcC\xc9\xe0j\x98\xbc\xfc\xff\xff\xff\xff\xff\xef?\xc4\xfcC\xc9\xe0j\x98\xbc\xfc\xff\xff\xff\xff\xff\xef?\xc4\xfcC\xc9\xe0j\x98\xbc\xfc\xff\xff\xff\xff\xff\xef?\xc4\xfcC\xc9\xe0j\x98\xbc\xfc\xff\xff\xff\xff\xff\xef?\xc4\xfcC\xc9\xe0j\x98\xbc\xfc\xff\xff\xff\xff\xff\xef?\xc4\xfcC\xc9\xe0j\x98\xbc\xfc\xff\xff\xff\xff\xff\xef?\xc4\xfcC\xc9\xe0j\x98\xbc\xfc\xff\xff\xff\xff\xff\xef?\xc4\xfcC\xc9\xe0j\x98\xbc\xfc\xff\xff\xff\xff\xff\xef?\xc4\xfcC\xc9\xe0j\x98\xbc\xfc\xff\xff\xff\xff\xff\xef?\xc4\xfcC\xc9\xe0j\x98\xbc\xfc\xff\xff\xff\xff\xff\xef?\xc4\xfcC\xc9\xe0j\x98\xbc\xfc\xff\xff\xff\xff\xff\xef?\xc4\xfcC\xc9\xe0j\x98\xbc\xfc\xff\xff\xff\xff\xff\xef?\xc4\xfcC\xc9\xe0j\x98\xbc\xfc\xff\xff\xff\xff\xff\xef?\xc4\xfcC\xc9\xe0j\x98\xbc\xfc\xff\xff\xff\xff\xff\xef?\xc4\xfcC\xc9\xe0j\x98\xbc\xfc\xff\xff\xff\xff\xff\xef?\xc4\xfcC\xc9\xe0j\x98\xbc\xfc\xff\xff\xff\xff\xff\xef?\xc4\xfcC\xc9\xe0j\x98\xbc\xfc\xff\xff\xff\xff\xff\xef?\xc4\xfcC\xc9\xe0j\x98\xbc\xfc\xff\xff\xff\xff\xff\xef?\xc4\xfcC\xc9\xe0j\x98\xbc\xfc\xff\xff\xff\xff\xff\xef?\xc4\xfcC\xc9\xe0j\x98\xbc\xfc\xff\xff\xff\xff\xff\xef?\xc4\xfcC\xc9\xe0j\x98\xbc\xfc\xff\xff\xff\xff\xff\xef?\xc4\xfcC\xc9\xe0j\x98\xbc\xfc\xff\xff\xff\xff\xff\xef?\xc4\xfcC\xc9\xe0j\x98\xbc\xfc\xff\xff\xff\xff\xff\xef?\xc4\xfcC\xc9\xe0j\x98\xbc\xfc\xff\xff\xff\xff\xff\xef?\xc4\xfcC\xc9\xe0j\x98\xbc\xfc\xff\xff\xff\xff\xff\xef?\xc4\xfcC\xc9\xe0j\x98\xbc\xfc\xff\xff\xff\xff\xff\xef?\xc4\xfcC\xc9\xe0j\x98\xbc\xfc\xff\xff\xff\xff\xff\xef?\xc4\xfcC\xc9\xe0j\x98\xbc\xfc\xff\xff\xff\xff\xff\xef?\xc4\xfcC\xc9\xe0j\x98\xbc\xfc\xff\xff\xff\xff\xff\xef?\xc4\xfcC\xc9\xe0j\x98\xbc\xfc\xff\xff\xff\xff\xff\xef?\xc4\xfcC\xc9\xe0j\x98\xbc\xfc\xff\xff\xff\xff\xff\xef?\xc4\xfcC\xc9\xe0j\x98\xbc\xfc\xff\xff\xff\xff\xff\xef?\xc4\xfcC\xc9\xe0j\x98\xbc\xfc\xff\xff\xff\xff\xff\xef?\xc4\xfcC\xc9\xe0j\x98\xbc\xfc\xff\xff\xff\xff\xff\xef?\xc4\xfcC\xc9\xe0j\x98\xbc\xfc\xff\xff\xff\xff\xff\xef?\xc4\xfcC\xc9\xe0j\x98\xbc\xfc\xff\xff\xff\xff\xff\xef?\xc4\xfcC\xc9\xe0j\x98\xbc\xfc\xff\xff\xff\xff\xff\xef?\xc4\xfcC\xc9\xe0j\x98\xbc\xfc\xff\xff\xff\xff\xff\xef?\xc4\xfcC\xc9\xe0j\x98\xbc\xfc\xff\xff\xff\xff\xff\xef?\xc4\xfcC\xc9\xe0j\x98\xbc\xfc\xff\xff\xff\xff\xff\xef?\xc4\xfcC\xc9\xe0j\x98\xbc\xfc\xff\xff\xff\xff\xff\xef?\xc4\xfcC\xc9\xe0j\x98\xbc\xfc\xff\xff\xff\xff\xff\xef?\xc4\xfcC\xc9\xe0j\x98\xbc\xfc\xff\xff\xff\xff\xff\xef?\xc4\xfcC\xc9\xe0j\x98\xbc\xfc\xff\xff\xff\xff\xff\xef?\xc4\xfcC\xc9\xe0j\x98\xbc\xfc\xff\xff\xff\xff\xff\xef?\xc4\xfcC\xc9\xe0j\x98\xbc\xfc\xff\xff\xff\xff\xff\xef?\xc4\xfcC\xc9\xe0j\x98\xbc\xfc\xff\xff\xff\xff\xff\xef?\xc4\xfcC\xc9\xe0j\x98\xbc\xfc\xff\xff\xff\xff\xff\xef?\xc4\xfcC\xc9\xe0j\x98\xbc\xfc\xff\xff\xff\xff\xff\xef?\xc4\xfcC\xc9\xe0j\x98\xbc\xfc\xff\xff\xff\xff\xff\xef?\xc4\xfcC\xc9\xe0j\x98\xbc\xfc\xff\xff\xff\xff\xff\xef?\xc4\xfcC\xc9\xe0j\x98\xbc\xfc\xff\xff\xff\xff\xff\xef?\xc4\xfcC\xc9\xe0j\x98\xbc\xfc\xff\xff\xff\xff\xff\xef?\xc4\xfcC\xc9\xe0j\x98\xbc\xfc\xff\xff\xff\xff\xff\xef?\xc4\xfcC\xc9\xe0j\x98\xbc\xfc\xff\xff\xff\xff\xff\xef?\xc4\xfcC\xc9\xe0j\x98\xbc\xfc\xff\xff\xff\xff\xff\xef?\xc4\xfcC\xc9\xe0j\x98\xbc\xfc\xff\xff\xff\xff\xff\xef?\xc4\xfcC\xc9\xe0j\x98\xbc\xfc\xff\xff\xff\xff\xff\xef?\xc4\xfcC\xc9\xe0j\x98\xbc\xfc\xff\xff\xff\xff\xff\xef?\xc4\xfcC\xc9\xe0j\x98\xbc\xfc\xff\xff\xff\xff\xff\xef?\xc4\xfcC\xc9\xe0j\x98\xbc\xfc\xff\xff\xff\xff\xff\xef?\xc4\xfcC\xc9\xe0j\x98\xbc\xfc\xff\xff\xff\xff\xff\xef?\xc4\xfcC\xc9\xe0j\x98\xbc\xfc\xff\xff\xff\xff\xff\xef?\xc4\xfcC\xc9\xe0j\x98\xbc\xfc\xff\xff\xff\xff\xff\xef?\xc4\xfcC\xc9\xe0j\x98\xbc\xfc\xff\xff\xff\xff\xff\xef?\xc4\xfcC\xc9\xe0j\x98\xbc\xfc\xff\xff\xff\xff\xff\xef?\xc4\xfcC\xc9\xe0j\x98\xbc\xfc\xff\xff\xff\xff\xff\xef?\xc4\xfcC\xc9\xe0j\x98\xbc\xfc\xff\xff\xff\xff\xff\xef?\xc4\xfcC\xc9\xe0j\x98\xbc\xfc\xff\xff\xff\xff\xff\xef?\xc4\xfcC\xc9\xe0j\x98\xbc\xfc\xff\xff\xff\xff\xff\xef?\xc4\xfcC\xc9\xe0j\x98\xbc\xfc\xff\xff\xff\xff\xff\xef?\xc4\xfcC\xc9\xe0j\x98\xbc\xfc\xff\xff\xff\xff\xff\xef?\xc4\xfcC\xc9\xe0j\x98\xbc\xfc\xff\xff\xff\xff\xff\xef?\xc4\xfcC\xc9\xe0j\x98\xbc\xfc\xff\xff\xff\xff\xff\xef?\xc4\xfcC\xc9\xe0j\x98\xbc\xfc\xff\xff\xff\xff\xff\xef?\xc4\xfcC\xc9\xe0j\x98\xbc\xfc\xff\xff\xff\xff\xff\xef?\xc4\xfcC\xc9\xe0j\x98\xbc\xfc\xff\xff\xff\xff\xff\xef?\xc4\xfcC\xc9\xe0j\x98\xbc\xfc\xff\xff\xff\xff\xff\xef?\xc4\xfcC\xc9\xe0j\x98\xbc\xfc\xff\xff\xff\xff\xff\xef?\xc4\xfcC\xc9\xe0j\x98\xbc\xfc\xff\xff\xff\xff\xff\xef?\xc4\xfcC\xc9\xe0j\x98\xbc\xfc\xff\xff\xff\xff\xff\xef?\xc4\xfcC\xc9\xe0j\x98\xbc\xfc\xff\xff\xff\xff\xff\xef?\xc4\xfcC\xc9\xe0j\x98\xbc\xfc\xff\xff\xff\xff\xff\xef?\xc4\xfcC\xc9\xe0j\x98\xbc\xfc\xff\xff\xff\xff\xff\xef?\xc4\xfcC\xc9\xe0j\x98\xbc\xfc\xff\xff\xff\xff\xff\xef?\xc4\xfcC\xc9\xe0j\x98\xbc\xfc\xff\xff\xff\xff\xff\xef?\xc4\xfcC\xc9\xe0j\x98\xbc\xfc\xff\xff\xff\xff\xff\xef?\xc4\xfcC\xc9\xe0j\x98\xbc\xfc\xff\xff\xff\xff\xff\xef?\xc4\xfcC\xc9\xe0j\x98\xbc\xfc\xff\xff\xff\xff\xff\xef?\xc4\xfcC\xc9\xe0j\x98\xbc\xfc\xff\xff\xff\xff\xff\xef?\xc4\xfcC\xc9\xe0j\x98\xbc\xfc\xff\xff\xff\xff\xff\xef?\xc4\xfcC\xc9\xe0j\x98\xbc\xfc\xff\xff\xff\xff\xff\xef?\xc4\xfcC\xc9\xe0j\x98\xbc\xfc\xff\xff\xff\xff\xff\xef?\xc4\xfcC\xc9\xe0j\x98\xbc\xfc\xff\xff\xff\xff\xff\xef?\xc4\xfcC\xc9\xe0j\x98\xbc\xfc\xff\xff\xff\xff\xff\xef?\xc4\xfcC\xc9\xe0j\x98\xbc\xfc\xff\xff\xff\xff\xff\xef?\xc4\xfcC\xc9\xe0j\x98\xbc\xfc\xff\xff\xff\xff\xff\xef?\xc4\xfcC\xc9\xe0j\x98\xbc\xfc\xff\xff\xff\xff\xff\xef?\xc4\xfcC\xc9\xe0j\x98\xbc\xfc\xff\xff\xff\xff\xff\xef?\xc4\xfcC\xc9\xe0j\x98\xbc\xfc\xff\xff\xff\xff\xff\xef?\xc4\xfcC\xc9\xe0j\x98\xbc\xfc\xff\xff\xff\xff\xff\xef?\xc4\xfcC\xc9\xe0j\x98\xbc\xfc\xff\xff\xff\xff\xff\xef?\xc4\xfcC\xc9\xe0j\x98\xbc\xfc\xff\xff\xff\xff\xff\xef?\xc4\xfcC\xc9\xe0j\x98\xbc\xfc\xff\xff\xff\xff\xff\xef?\xc4\xfcC\xc9\xe0j\x98\xbc\xfc\xff\xff\xff\xff\xff\xef?\xc4\xfcC\xc9\xe0j\x98\xbc\xfc\xff\xff\xff\xff\xff\xef?\xc4\xfcC\xc9\xe0j\x98\xbc\xfc\xff\xff\xff\xff\xff\xef?\xc4\xfcC\xc9\xe0j\x98\xbc\xfc\xff\xff\xff\xff\xff\xef?\xc4\xfcC\xc9\xe0j\x98\xbc\xfc\xff\xff\xff\xff\xff\xef?\xc4\xfcC\xc9\xe0j\x98\xbc\xfc\xff\xff\xff\xff\xff\xef?\xc4\xfcC\xc9\xe0j\x98\xbc\xfc\xff\xff\xff\xff\xff\xef?\xc4\xfcC\xc9\xe0j\x98\xbc\xfc\xff\xff\xff\xff\xff\xef?\xc4\xfcC\xc9\xe0j\x98\xbc\xfc\xff\xff\xff\xff\xff\xef?\xc4\xfcC\xc9\xe0j\x98\xbc\xfc\xff\xff\xff\xff\xff\xef?\xc4\xfcC\xc9\xe0j\x98\xbc\xfc\xff\xff\xff\xff\xff\xef?\xc4\xfcC\xc9\xe0j\x98\xbc\xfc\xff\xff\xff\xff\xff\xef?\xc4\xfcC\xc9\xe0j\x98\xbc\xfc\xff\xff\xff\xff\xff\xef?\xc4\xfcC\xc9\xe0j\x98\xbc\xfc\xff\xff\xff\xff\xff\xef?\xc4\xfcC\xc9\xe0j\x98\xbc\xfc\xff\xff\xff\xff\xff\xef?\xc4\xfcC\xc9\xe0j\x98\xbc\xfc\xff\xff\xff\xff\xff\xef?\xc4\xfcC\xc9\xe0j\x98\xbc\xfc\xff\xff\xff\xff\xff\xef?\xc4\xfcC\xc9\xe0j\x98\xbc\xfc\xff\xff\xff\xff\xff\xef?\xc4\xfcC\xc9\xe0j\x98\xbc\xfc\xff\xff\xff\xff\xff\xef?\xc4\xfcC\xc9\xe0j\x98\xbc\xfc\xff\xff\xff\xff\xff\xef?\xc4\xfcC\xc9\xe0j\x98\xbc\xfc\xff\xff\xff\xff\xff\xef?\xc4\xfcC\xc9\xe0j\x98\xbc\xfc\xff\xff\xff\xff\xff\xef?\xc4\xfcC\xc9\xe0j\x98\xbc\xfc\xff\xff\xff\xff\xff\xef?\xc4\xfcC\xc9\xe0j\x98\xbc\xfc\xff\xff\xff\xff\xff\xef?\xc4\xfcC\xc9\xe0j\x98\xbc\xfc\xff\xff\xff\xff\xff\xef?\xc4\xfcC\xc9\xe0j\x98\xbc\xfc\xff\xff\xff\xff\xff\xef?\xc4\xfcC\xc9\xe0j\x98\xbc\xfc\xff\xff\xff\xff\xff\xef?\xc4\xfcC\xc9\xe0j\x98\xbc\xfc\xff\xff\xff\xff\xff\xef?\xc4\xfcC\xc9\xe0j\x98\xbc\xfc\xff\xff\xff\xff\xff\xef?\xc4\xfcC\xc9\xe0j\x98\xbc\xfc\xff\xff\xff\xff\xff\xef?\xc4\xfcC\xc9\xe0j\x98\xbc\xfc\xff\xff\xff\xff\xff\xef?\xc4\xfcC\xc9\xe0j\x98\xbc\xfc\xff\xff\xff\xff\xff\xef?\xc4\xfcC\xc9\xe0j\x98\xbc\xfc\xff\xff\xff\xff\xff\xef?\xc4\xfcC\xc9\xe0j\x98\xbc\xfc\xff\xff\xff\xff\xff\xef?\xc4\xfcC\xc9\xe0j\x98\xbc\xfc\xff\xff\xff\xff\xff\xef?\xc4\xfcC\xc9\xe0j\x98\xbc\xfc\xff\xff\xff\xff\xff\xef?\xc4\xfcC\xc9\xe0j\x98\xbc\xfc\xff\xff\xff\xff\xff\xef?\xc4\xfcC\xc9\xe0j\x98\xbc\xfc\xff\xff\xff\xff\xff\xef?\xc4\xfcC\xc9\xe0j\x98\xbc\xfc\xff\xff\xff\xff\xff\xef?\xc4\xfcC\xc9\xe0j\x98\xbc\xfc\xff\xff\xff\xff\xff\xef?\xc4\xfcC\xc9\xe0j\x98\xbc\xfc\xff\xff\xff\xff\xff\xef?\xc4\xfcC\xc9\xe0j\x98\xbc\xfc\xff\xff\xff\xff\xff\xef?\xc4\xfcC\xc9\xe0j\x98\xbc\xfc\xff\xff\xff\xff\xff\xef?\xc4\xfcC\xc9\xe0j\x98\xbc\xfc\xff\xff\xff\xff\xff\xef?\xc4\xfcC\xc9\xe0j\x98\xbc\xfc\xff\xff\xff\xff\xff\xef?\xc4\xfcC\xc9\xe0j\x98\xbc\xfc\xff\xff\xff\xff\xff\xef?\xc4\xfcC\xc9\xe0j\x98\xbc\xfc\xff\xff\xff\xff\xff\xef?\xc4\xfcC\xc9\xe0j\x98\xbc\xfc\xff\xff\xff\xff\xff\xef?\xc4\xfcC\xc9\xe0j\x98\xbc\xfc\xff\xff\xff\xff\xff\xef?\xc4\xfcC\xc9\xe0j\x98\xbc\xfc\xff\xff\xff\xff\xff\xef?\xc4\xfcC\xc9\xe0j\x98\xbc\xfc\xff\xff\xff\xff\xff\xef?\xc4\xfcC\xc9\xe0j\x98\xbc\xfc\xff\xff\xff\xff\xff\xef?\xc4\xfcC\xc9\xe0j\x98\xbc\xfc\xff\xff\xff\xff\xff\xef?\xc4\xfcC\xc9\xe0j\x98\xbc\xfc\xff\xff\xff\xff\xff\xef?\xc4\xfcC\xc9\xe0j\x98\xbc\xfc\xff\xff\xff\xff\xff\xef?\xc4\xfcC\xc9\xe0j\x98\xbc\xfc\xff\xff\xff\xff\xff\xef?\xc4\xfcC\xc9\xe0j\x98\xbc\xfc\xff\xff\xff\xff\xff\xef?\xc4\xfcC\xc9\xe0j\x98\xbc\xfc\xff\xff\xff\xff\xff\xef?\xc4\xfcC\xc9\xe0j\x98\xbc\xfc\xff\xff\xff\xff\xff\xef?\xc4\xfcC\xc9\xe0j\x98\xbc\xfc\xff\xff\xff\xff\xff\xef?\xc4\xfcC\xc9\xe0j\x98\xbc\xfc\xff\xff\xff\xff\xff\xef?\xc4\xfcC\xc9\xe0j\x98\xbc\xfc\xff\xff\xff\xff\xff\xef?\xc4\xfcC\xc9\xe0j\x98\xbc\xfc\xff\xff\xff\xff\xff\xef?\xc4\xfcC\xc9\xe0j\x98\xbc\xfc\xff\xff\xff\xff\xff\xef?\xc4\xfcC\xc9\xe0j\x98\xbc\xfc\xff\xff\xff\xff\xff\xef?\xc4\xfcC\xc9\xe0j\x98\xbc\xfc\xff\xff\xff\xff\xff\xef?\xc4\xfcC\xc9\xe0j\x98\xbc\xfc\xff\xff\xff\xff\xff\xef?\xc4\xfcC\xc9\xe0j\x98\xbc\xfc\xff\xff\xff\xff\xff\xef?\xc4\xfcC\xc9\xe0j\x98\xbc\xfc\xff\xff\xff\xff\xff\xef?\xc4\xfcC\xc9\xe0j\x98\xbc\xfc\xff\xff\xff\xff\xff\xef?\xc4\xfcC\xc9\xe0j\x98\xbc\xfc\xff\xff\xff\xff\xff\xef?\xc4\xfcC\xc9\xe0j\x98\xbc\xfc\xff\xff\xff\xff\xff\xef?\xc4\xfcC\xc9\xe0j\x98\xbc\xfc\xff\xff\xff\xff\xff\xef?\xc4\xfcC\xc9\xe0j\x98\xbc\xfc\xff\xff\xff\xff\xff\xef?\xc4\xfcC\xc9\xe0j\x98\xbc\xfc\xff\xff\xff\xff\xff\xef?\xc4\xfcC\xc9\xe0j\x98\xbc\xfc\xff\xff\xff\xff\xff\xef?\xc4\xfcC\xc9\xe0j\x98\xbc\xfc\xff\xff\xff\xff\xff\xef?\xc4\xfcC\xc9\xe0j\x98\xbc\xfc\xff\xff\xff\xff\xff\xef?\xc4\xfcC\xc9\xe0j\x98\xbc\xfc\xff\xff\xff\xff\xff\xef?\xc4\xfcC\xc9\xe0j\x98\xbc\xfc\xff\xff\xff\xff\xff\xef?\xc4\xfcC\xc9\xe0j\x98\xbc\xfc\xff\xff\xff\xff\xff\xef?\xc4\xfcC\xc9\xe0j\x98\xbc\xfc\xff\xff\xff\xff\xff\xef?\xc4\xfcC\xc9\xe0j\x98\xbc\xfc\xff\xff\xff\xff\xff\xef?\xc4\xfcC\xc9\xe0j\x98\xbc\xfc\xff\xff\xff\xff\xff\xef?\xc4\xfcC\xc9\xe0j\x98\xbc\xfc\xff\xff\xff\xff\xff\xef?\xc4\xfcC\xc9\xe0j\x98\xbc\xfc\xff\xff\xff\xff\xff\xef?\xc4\xfcC\xc9\xe0j\x98\xbc\xfc\xff\xff\xff\xff\xff\xef?\xc4\xfcC\xc9\xe0j\x98\xbc\xfc\xff\xff\xff\xff\xff\xef?\xc4\xfcC\xc9\xe0j\x98\xbc\xfc\xff\xff\xff\xff\xff\xef?\xc4\xfcC\xc9\xe0j\x98\xbc\xfc\xff\xff\xff\xff\xff\xef?\xc4\xfcC\xc9\xe0j\x98\xbc\xfc\xff\xff\xff\xff\xff\xef?\xc4\xfcC\xc9\xe0j\x98\xbc\xfc\xff\xff\xff\xff\xff\xef?\xc4\xfcC\xc9\xe0j\x98\xbc\xfc\xff\xff\xff\xff\xff\xef?\xc4\xfcC\xc9\xe0j\x98\xbc\xfc\xff\xff\xff\xff\xff\xef?\xc4\xfcC\xc9\xe0j\x98\xbc\xfc\xff\xff\xff\xff\xff\xef?\xc4\xfcC\xc9\xe0j\x98\xbc\xfc\xff\xff\xff\xff\xff\xef?\xc4\xfcC\xc9\xe0j\x98\xbc\xfc\xff\xff\xff\xff\xff\xef?\xc4\xfcC\xc9\xe0j\x98\xbc\xfc\xff\xff\xff\xff\xff\xef?\xc4\xfcC\xc9\xe0j\x98\xbc\xfc\xff\xff\xff\xff\xff\xef?\xc4\xfcC\xc9\xe0j\x98\xbc\xfc\xff\xff\xff\xff\xff\xef?\xc4\xfcC\xc9\xe0j\x98\xbc\xfc\xff\xff\xff\xff\xff\xef?\xc4\xfcC\xc9\xe0j\x98\xbc\xfc\xff\xff\xff\xff\xff\xef?\xc4\xfcC\xc9\xe0j\x98\xbc\xfc\xff\xff\xff\xff\xff\xef?\xc4\xfcC\xc9\xe0j\x98\xbc\xfc\xff\xff\xff\xff\xff\xef?\xc4\xfcC\xc9\xe0j\x98\xbc\xfc\xff\xff\xff\xff\xff\xef?\xc4\xfcC\xc9\xe0j\x98\xbc\xfc\xff\xff\xff\xff\xff\xef?\xc4\xfcC\xc9\xe0j\x98\xbc\xfc\xff\xff\xff\xff\xff\xef?\xc4\xfcC\xc9\xe0j\x98\xbc\xfc\xff\xff\xff\xff\xff\xef?\xc4\xfcC\xc9\xe0j\x98\xbc\xfc\xff\xff\xff\xff\xff\xef?\xc4\xfcC\xc9\xe0j\x98\xbc\xfc\xff\xff\xff\xff\xff\xef?\xc4\xfcC\xc9\xe0j\x98\xbc\xfc\xff\xff\xff\xff\xff\xef?\xc4\xfcC\xc9\xe0j\x98\xbc\xfc\xff\xff\xff\xff\xff\xef?\xc4\xfcC\xc9\xe0j\x98\xbc\xfc\xff\xff\xff\xff\xff\xef?\xc4\xfcC\xc9\xe0j\x98\xbc\xfc\xff\xff\xff\xff\xff\xef?\xc4\xfcC\xc9\xe0j\x98\xbc\xfc\xff\xff\xff\xff\xff\xef?\xc4\xfcC\xc9\xe0j\x98\xbc\xfc\xff\xff\xff\xff\xff\xef?\xc4\xfcC\xc9\xe0j\x98\xbc\xfc\xff\xff\xff\xff\xff\xef?\xc4\xfcC\xc9\xe0j\x98\xbc\xfc\xff\xff\xff\xff\xff\xef?\xc4\xfcC\xc9\xe0j\x98\xbc\xfc\xff\xff\xff\xff\xff\xef?'
p118
tp119
bag2
(g3
(I0
tp120
g5
tp121
Rp122
(I1
(I2
I249
tp123
g12
I01
S'M\xa1\x9f\xf6\xdd\x8a\xc6\xbfR\xeb)@\xb8\x89\xf6?\xf3%\x7f7g\xd7\x9f\xbf\xa2\x1c\xe8]\xac\x00\xf1?\x8f\xe3\x81\x84\xf6\x87\xd0\xbf9[3\xd5\x87?\xf9?\x80\xe9i\x1f9\x7f\xd1\xbf\x9eU\xd8[!\x7f\xf9?\xcfi\xe7\xaaN|\x96\xbf\xa7\xf4&\x94\x16\x04\xf1?fz\xdd\x9a4\xff\xd1\xbf\x9b:pz9\xfa\xf9?\xd9\xb0\xa9\x0fw\x16\xcc\xbf\xda\xb2k*\xa5\xa8\xf7?\x9f\xcb{\x13l@\xcf\xbf\xb8\x88T\xdcH\xb6\xf8?o\x90\x10\xc1\x8c\xa5\xb6\xbf\xd6W\xf2\xf1>\x1c\xf3?\x9e \xf5\xfb$Z\xce\xbf\xc5@FBvi\xf8?\x18*\x9cJD\xd7\xd0\xbf\xe6$\xfd\x19V\x89\xf9?~\xee\n\xf9\xbbQ\xd1\xbf\x89\xaeKe\xec\xce\xf9?\x83\\0\xbf\x17\xbd\xd3\xbfR\xfc\xf0\x0f\x1f~\xfb?y\xc8\x1c\xef\xad\x90\xca\xbf\xe4\xabQ=A\x1d\xf7?\xf4\xc5@\x80\xd5\xf1\xa0\xbf\xedR\x9fT\x04\xfb\xf0?-\x01\x07\xc9\xfb\x90\xd3\xbf\xe7\xc6\xe0G\xe4\x13\xfb?\x19\xbb\x85K;3\xca\xbf\xb9;0y\x91\x99\xf7?\xb0\xe4\xe1L\x97\xc4\xca\xbf#\xd6\x95\xb6\x88\xbf\xf7?\xc60\x07\xe8\x83c\xa4\xbfF|\x00\xdb\xbe\x7f\xf1?\xb8\x9b\xe5rq\xa7\xd3\xbf\xf5\xa4\xdd.4\x19\xfb?R\x1a\xf1#\x0e\x1f\xbd\xbf\x9c\xfd(\';\x07\xf4?JU\xc3\x88\x89\x05\xd0\xbf72\x85?k\xab\xf8?P\xc3\xa0\xa1\x83O\xb7\xbf\x0e\xdaj\xb7C@\xf3?\xd7xY\xe1\xa6p\xcf\xbf\x1be\xe5;\xcb$\xf9?\xcd\xcdf\xd4\xd5)\x96\xbf\xae\xfc\xd4\xfe\xa6\xc7\xf0?\xdf\x1d\x15\xe7\xc1[\xca\xbfs\xd5@:!\xf0\xf6?\xb2\x13\xeb\x8aAb\xc8\xbf\xc3].\xce\x85\xfe\xf6?v\xddu\r\x90\xc9W?.\xb3\xbc\x15p\xde\xef?\xff\x00k\xd9\xca\x0e\xce\xbfg\xf6\x99\xfe\x02J\xf8?\xdb\xb6\xbb\xedl\xd7\xc4\xbf?G\xb3\x95\xdf\xb4\xf5?\x16M"\x8dk@\xbd\xbf~K\xa8\xf2n\xe6\xf3?\xf7>\xe8"<)\xc2\xbf\xbe#\xee\x91\xf7\xe5\xf4?\xe6\xde>\xc9a\x86\xd0\xbfM\x8e\xec\x7f\x11\x11\xf9?\x11\x84\xbdd\xf7\x9f\xc9\xbfc\x8f\xf3;\x9c+\xf7?r{\xfd\x0c\x1c\x1d\xd2\xbfz\xa6\xcc\x1c\xac\xf0\xf9?K\xc7\xc4\t\xef-\xc0\xbfH\x14#G^\xc2\xf4?\xae4\x8dk\x0f#\xd1\xbf\xc0B\xfah\xb8\xe6\xf9?\xab\x01H9\xfe\xc9\xc8\xbf\xeeY\xff\x0c\x7f\xd6\xf6?\x06\xf2\xbfkR\xee\xca\xbf^\x04\x91\xd7\xbbV\xf7?vJ\x89\x99Z\xe9\xaf\xbf\x9c\x8a\x93%\xb5P\xf2?\x04\x00\xf6\x0e\x83\xf2\xd2\xbf/`\xcb\rH\xf1\xfa?\x04\x9b?9r\xae\xd0\xbf\x0e\xa7\x06P.\x84\xf9?\x94\x981\xfc+\xcd\xb1\xbfK\xb6\xad\x99\xcf?\xf2?M\xee\x9cC\x99\xca\xcd\xbf\xea!\x90\x96\x04]\xf8?\x0e\xe3\xdd\xc6\xb4\xf9\xd2\xbf\xe0\xd2\xbd\xe9 Y\xfa?\x8f"\xe1(\x0b\x15\xbb\xbf*U\xc6D\xd6\xaa\xf3?C\xdc\xab\xc2\x0c\xe9\xd1\xbf\x08\xe8K\xe0e\xc3\xf9?\x1e\xe6L\x8b\xb0|\x9e\xbf\x1a\xf4c\x00Z\xe8\xf0?+w(7\x90\x15\xb5\xbf\xfe\xd3o\xb3\x17\xe8\xf2?O*@\xe0\xc97\x99?\x9er\xbe\xdf\x94\xfe\xed?\xfdg\xe2\x87\xbaA\xc3\xbf\x10\xea\xcc\xa2\xa7D\xf5?W\xa6\xfd\x9f\xb8\xcdu?\x0b\xef\x0f\xadv\x88\xef?:\x85\xfa\xb9\xfdE\xc1\xbf\x88\xd9nNK\xa0\xf4?\x98!-\xa4W\x1a\xd3\xbf\xe1>\xa0\xf2h?\xfb?c\x16U\xcbe\xf2y?\xf0\xff\xcf~#\t\xef?c\x97\x18\xad\x00$\xb4\xbf\x84J\x00l\x00\xb8\xf2?\xfd\x1c\x8f;\x1cI\xd3\xbf\xd2\xa5\xc2;\x12\xfc\xfa?\x91\xf4\x93m\xbb\x9f\xd4\xbf\xd1\x9dFwL\xf9\xfb?\x01f\xc9\x0e\x84\x1c\xb6\xbf\x19\xdct\x84B\xce\xf2?\xad\xd8\xec\xc6i\xba\x9f\xbfN\x91q\xfaf\x1d\xf1?\x88}9\x02;i\xd3\xbf\xf1E\x85\x81\xbe%\xfb?&\xa1\xca\xc3`\xef\xc3\xbf\xea\x9av6\xbf`\xf5?\xee\x15l\x9c\xa6\x17\xc1\xbf\xd3\x95c\x0e\xb4\xee\xf4?\x12\x03\x86\xa5B\x99\xd0\xbf\x8b\xa0\xb7\xccc\xa0\xf9?\x12\x0c\xc0\xd3\x1a\x91\xbb\xbf\x0f5\xa0\xc0\x1d\x0b\xf4?^\xcb7\n_f\xd3\xbf?\x93\x06\x8f\x81\x08\xfb?\x1bY9\xe5\\#\xc2\xbfu\xe5\x84\xd5o0\xf5?\xfa\x9d\x13K\x88\xa3\xc7\xbf2\xdd\x16A \xc1\xf6?\x99\xeeW\r-r\xc0\xbf7\xec\xea\xf1\xbez\xf4?\x04\xd0\x19\r\xf6W\xd3\xbfm\xbf\xeb\x82qG\xfb?\xcc\xd6\x8e\xe5+G\xd0\xbf\xe3\xbd\x91\x86\x8a/\xf9?bm\xfe\xda\x9e$\xd0\xbf\x15\xf0`\xe9\x95\xd3\xf8?\xcah\x08p\xd9U\xd0\xbf %\xacr\x97\xdc\xf8?\xe4\x87\x97\xf0\xa6\x87\xc3\xbf\xd2~M0\xe9O\xf5?\x19!u\xd7\xda9\xce\xbf\x8a\xee^\xc4\x80j\xf8?\xd2\x9d\xa9G\xe5N\xb3\xbf\xd3\xaa"\x84 \x9e\xf2?\x15/\t^w\x84\xcc\xbf(\x11\xda\x89\n\x1b\xf8?S\x0b\x99\tr\xf7\x8e\xbf\x93\xd2\x18\xb3\x1a\xb3\xf0?\x94\x7f\x1f\x04\x88\x02\xc6\xbf:,\x1bj\xacB\xf6?\x0f\x9e\xa5\x0cl\xfa\xc7\xbf\xd7\x15\x07\xd5\x9f\x93\xf6?\x9az\xc8F\xd4\xb7\x83\xbf\xf6\xb0_\x01wa\xf0?\x85E`\xa6=\xd5\xc0\xbf\xc1\xc1\x16\x92\xbf\xbc\xf4?BP\x0cw\x0f\xef\xc3\xbf\xfd\xc3\x7fF\r[\xf5?\xc2q\x8a\x06\xfe\xca\x83?\n,\xc7\x8az\x83\xef?n\x97c\xc3\xfc,\xd0\xbf\x8e\xdc\xf6\x0c\x88b\xf9?p\xf3\x19u\xd6\r\xc1\xbf\x05A\x92\xb0\xaa\x14\xf5?\xbd\xbc\x1b\xa8\xd1\x01\x93\xbf\x02\xaf\xed,\xf6\x8a\xf0?>\xce@W\x0b\x1d\x95?\xd2\x14M\xa8\x93k\xee?\xd8ep\x06\xe3\x83\x87\xbf\x07\x96\xcac\xc9u\xf0?%\xae5N\xb5\x1f\xd0\xbf=\x9bw\xe3\x8d\xe2\xf8? \xe0\'?\xb8\xc1\xd4\xbf\xf0\xa2e\xb0\x87\xae\xfb?\x14&\xc0\x8a\x06Y\xd2\xbfKP\xe1\xf1<\xc5\xfa?\x08^e=\xc0\x9d\x86?\x1a\xeba\x04\xe0\\\xef?\x91\xf9\xff\xb8\xb4O\xc4\xbfG\xc9\x00\xe5\xe2\x7f\xf5?\xe5P\xdd\x97\xc5*\xaa\xbf?w\xc5\xd1\xfc\xdb\xf1?y\xcb\x82\xb7\xe3\x95\xc0\xbf\xe4\'\xd6du\x82\xf4?Z\x01\x9d\xa1[\xc7\xd1\xbf\x92\x11y\xfb\x9a\xe3\xf9?f\xe6\x9d\xa4\x8e\xda\xd1\xbf\xbb\xcc\xd7o\x10!\xfa?\xe7\xdb\x1f\xc7\xee\x08\xb6\xbf\x93e^\xa9\xb3\x13\xf3?\xd6\x11\xab(\x07\x9a\xd0\xbf\x06>\x957\xea\xba\xf9?\x9c\xf9k[:\x8c\x90\xbf\xb7\xe3p\x1e:\xaf\xf0?\x0c$\xa1\xb67\x7f\xc8\xbf\xc1\xf6F\xfdTC\xf7?8c\x0e\xc5\xecV\x9f\xbf\xf6\x9d\xfc\x84\xa3&\xf1?!\xb7Y\x89\xcba\x95\xbf\xa28\xc7\x99\xc6\xb4\xf0?\xfc\xc4\xb6\xfdd\xa8\xb1\xbf\xa5r\xf0*\xe4h\xf2?\xc1\xc0=\x9b&O\xd3\xbf)\xb4\x95h\xf7\xe6\xfa?\x8a+\xb8\x8c\xd7\xe1\xbd\xbf\xd2\x92\x94\xb1\x9c\xfc\xf3?\xb2\x940\xa4\xb3$r\xbf\x07Eq1\xdd\\\xf0?\x04\xb6\xea\x98\x18&\xd0\xbf\xe9\xeaH6\xd5\x08\xf9?Oq{\x08\x16\x04\xd0\xbf\x17\xcau\xc0\x08\xc7\xf8?\xe4\xce\x99\xfc]\x11\xcd\xbfy\xef\xe7<\x86A\xf8?\x13H\x90\xe5\x0c\xf1\xcd\xbf\\\xb8]n/#\xf8?\xfa\xdc\xa1\x05\x85a\xcb\xbf \x8eL\xa8\xbe\x97\xf7?Q*D\xdf\x0fF|\xbfh\x9eR\xfcrG\xf0?\xab\xcf\x7f\x1f\xf0\xcf\xd3\xbf0\xf7\t\xd3\xd24\xfb?@\x8d\x13y\xe2\x9b\xc4\xbf&\x8fFp\xd8\xd7\xf5?(\x9f\xbc\x83\xcd\t\xd0\xbf\xe0\x0e[O,\xac\xf8?Pkc%L\x98\xcc\xbfN/\xf2\xb2H\xfa\xf7?\x98\x1e\x93\\\xed]\xd0\xbf\xf0w\xc0\xf4\x8a\x10\xf9?\x97x\xa9Cjs\xca\xbf\xa0\x80\xa5"\x92(\xf7?\xa3\xe3\x9f+\xa2\x94\xaf\xbf\x00\xf1l\xca6\x12\xf2?\xb1\x14+\xc2\xfb\xdc\xc8\xbfR+\x08xe\xce\xf6?\xbc.\x12\xfcT\xbd\xbb\xbfM\xf3\xed\xcb@\xad\xf3?\xe5\xf3%\xc4\xde\x96\xd0\xbf\xa6\x9f\xda\x08\xcdN\xf9?\x83\xb9\xa0\xd0\xf6\x83\xcf\xbf\x02\x97E`w\xf7\xf8?\xdb[\x1f\x07Wr\x8f\xbfb\xfe\xc8\xd8\xbc\x99\xf0?6\x84\xa7\xb3\\+\xa3\xbf\':i\xe7\xab\'\xf1?\x83\xad\xdd\x8a\x920\xd1\xbf9\xb0\xf4%&\xfe\xf9?\xec\xa9\x0c\x8d\xf6\x9c\xc6\xbf\xce\xb3\x1c\xe3B\xb5\xf6?\x88/\xe1>d\xda\xca\xbfP\x81V5${\xf7?\\\xa5\x16\xbd\xe6L\xb1\xbf\x00\xbb\x96\x1d\x14f\xf2?\x8c\'E;\xed\x04\xcb\xbf\xfb\x89\xac\xdeP\x9f\xf7?\xf5Z\xfa\xcf\xd8E\xd2\xbf\x8d\xe9\xba\xa3\x1a(\xfa?;\xf7\x9f\xfe\x89\xa0\x97\xbf\xcc\x87\x8d\xf5\x85\xc2\xf0?\x1b\xee\xee\x88\xe3\xf0j\xbf\xe99\xffP\xdc\x06\xf0?`k\x87\xe0\xbb\xed\xd0\xbf\xcf\x08\xc0H\xf3\x95\xf9?2\x05\x1a\x1c\x97\x1cg\xbf\xa0\xa4\x08>B\x1a\xf0?v\xcb\xe2*\xb1\xbd\xb5\xbfbA\x0f\xe1\x8f\xef\xf2?~\xd3"\xb9`H\xb5\xbf\xdf\x02\x92\xe9\xfe\xc1\xf2?\xdb\xe5BDQ\xba\xcc\xbf=\x0b\x9d\xa3\xf4\xd7\xf7?\x9e\xec\x8eY\xf6\xa4\xce\xbf\xech\x98\x04\x92_\xf8?\x10\x98\x8eE\xc1\x7f\xa9\xbf\x00JdK\xdf\xd6\xf1?\x0f1e\x96\x95\xe5\xac\xbf\xc4\x1aA\xc2\xe2\xf2\xf1?\xa0E}}rD\xd1\xbf7@\xfa\xa2\x01\xd3\xf9?\xa2\xa0\xa6\xc6\xa7\xcc\xcd\xbf\xd9L|\xf1\x98k\xf8?\xb6\xe7dX\xd9\x1b\xd3\xbf\x0f\xc2\xdd\xaa\xad\xb6\xfa?\xcb\xd8_\xd1\xe8\xc7\xd4\xbf\x91(d\xe9P\xbf\xfb?\x7f\xc9\xe4\xd34\xac\xce\xbf\xcf$K\x0f\x18|\xf8?\x00b\xff\xa2\xf5N\xd1\xbf+\xc74\xfe\x8b\xd3\xf9?\x80/\xc3\xf7\xdc\xbb\x99\xbf\xdc\\\xc3\xecs\xe7\xf0?r\'\xc1\x90\xeb\xa5\xd3\xbf\xc5\x06\x99\x0f\x85X\xfb?]\x1b\xdb\x13\x1b\x0e\xd4\xbfu\xb8^\x9b\xd1[\xfb?\xd2\xf7\x93)\xc7|\xd0\xbf\xd4\xde\x15Uu3\xf9?\xf7\xffe?\x14\xff\xcf\xbf\\\x97\xc3\x8b\xd52\xf9?9\x87\x83U6\xd5\xd2\xbf\x9e\x13D~/\xe5\xfa?\xc5!o\xaa\x9f\xc4\xc9\xbf\xc2O\xd0\xbc\xda\x11\xf7?\x83\xf9\xa6\xaa\xa3\xc2\xd0\xbfU6M\xc3\xe2\x88\xf9?\xc7~\xa0M\xdcL\xc2\xbf@\x15if\x98\xe2\xf4?\xad\x01\xe5\x93\x18\xe5t\xbf\xd8\x03\xb9\xde\x17\x0b\xf0?\x99,\x95T$\x10\xce\xbf\xba\xc2}|\xf3\x94\xf8?\x85\xb2Z\xa4\xb6%\xb7\xbf\xa1\xf7\xce\x10\x18G\xf3?\xe1x\xa6y;\xbf\xbb\xbf\xa1\xc2?\x047\xd2\xf3?\x06\xc1#\x04\x96\x08\xd3\xbf\xdc\xba\xb23\x90\xb6\xfa?\xd3\x89\x1c\x87j\x81\xb8\xbfT\x01&\xad\xc1[\xf3? z\xa0k6\\\xc1\xbf\x07\xc0X\'7\xf9\xf4?\x07\x86\x96\x94*\xac\xcc\xbfv\xf8\xde\x8c\xce\xdc\xf7?\xadB\xa0\x9b\xbe\xad\xc9\xbf\xb7\xb2\xcb\xec\xa8H\xf7?>\xe9\xf3\xc7\r\x18\xd0\xbf\xc6S\x9d\x07\xb7\x07\xf9?\xb0\x1e\x0b\xb9\xd35\xc3\xbf7\x191\xf8C5\xf5?\x89\x97i\xaa\xc5!\xd2\xbf\xf7\xcd\xcc\xcf\xc6\xcb\xfa?o\xe8\x93\x9f\xfcy\xd2\xbf=\xed#\xcc\x05\r\xfa?\x9b$E-\x0b{\xb9\xbf\x99\xfd\xefRcR\xf3?f:\x05 \x85\xfb\xc6\xbf\xbc9\xf7Lq\x96\xf6?\xf6 \xde\xcd9`\xac\xbfC\xd9G\xbd\x8b\x06\xf2?\xba\x89\x18\xe0\x04\xce\x93\xbfM\xae\x7f\xc4\x1c\xb8\xf0?\xb2\x84N\xe2\xb3W\xb3\xbf\x95t\xb8x\x04\xab\xf2?\x1e\xd1\xe0\xdcSV\xc0\xbf\xf2\x17\x1f\xd9\x9a^\xf4?\x87\xe4_\x99\xe3\x8b\x92\xbf\xe2\xad\xdb\xe2n\x8d\xf0?^B\toZ\xb9\xd1\xbfQ\x0c\x0es\xff\xa9\xf9?6\x15d\x96\xd7\x85\xb2\xbf:IF\xd1\xd9b\xf2?\x91G\x02\xb5eq\xcb\xbf\xb6\x04:\xe9\x86\x9c\xf7?m\xf2JMH\x07\xc2\xbf\xce,\x8c\xd2\x02\x05\xf5?\x98P\xf6\xf8D\xe0\xcd\xbf)\x95\xa5h\xe9i\xf8?\x9e\xfc\x8f<\xe8\xb0t\xbf\x05\xfc\x8761@\xf0?\xce\xfb\x86\xc7Y1\xc3\xbfH\x935\x8b\x8cs\xf5?j\xda\xbcSnt\xcb\xbfxU\xa2O\xfe`\xf7?\x0c\t\x9b\xd6\x91K\xaa\xbf6\xdd\xb4\x8d\xf2\x83\xf1?\xd9\x0b\x05\xe7>\xae\xd3\xbf\xec\x01\xd1\xab\x88.\xfb?}\xa7\xf8\xca\'on\xbf\xf3\x7f\xa7"E\xb6\xef?\xf9&\xd1\x8c\xab\x1e\xc7\xbf\x01\x8eO\xf0^p\xf6?6\x81\re\x91\x0f\xd4\xbf\xe5\xdb\xdbm\xf9e\xfb?\x0f3\xb0W\x98\x07\xa8\xbf\x15\x1f14\x90\xe7\xf1?\xee\xc5x\xf8\x8c\xb2\xc4\xbf\xa2\x8d\xabl\x07\xa6\xf5?\x99\xb0i\xee\xed\xcd\xcf\xbf\x0b\x92\xa4\x05b\xfa\xf8?D\xaf\xf8\x88\x98\xc0\xcf\xbf\x91\x97N\xf5E\x05\xf9?}\xd5\xca\x13\xa8\xd5\xd3\xbf?\x90\xd4f\x93\x17\xfb?\xaaK\x04>\xd1`\xcf\xbf\x89ZP\x11\x89\x85\xf8?K)\n\x02\xcd\x96\xd3\xbf+\xd9$\xdc \xbb\xfa?T%C\x1f7\x93\xc8\xbf\xb5\xe6+\x0bA\xf6\xf6?%\xde\xfb`<\x92\xc7\xbf\n\xf15n\x92\xe3\xf6?\xab\xe3\xd6\xa8\x19\xdf\xcd\xbfR\x17\xb3\x0eYQ\xf8?n\x10G\xd4\xf7w\xa5\xbf\xca?\xdd\xdb\xebw\xf1?\x10]g\xba\xb8|\xcb\xbf?:N\x05\x1a\xa6\xf7?,$\x89(\x90\x1d\xb3\xbf{\xd1C\xfe)\xb2\xf2?\x86\x84\x00g.\x02\xbb\xbf\xd5\xe0\xad\x85\xe8\x15\xf4?\xd5i\xc0*?\xcc\xcd\xbft\xeedh1\xb4\xf8?rN\xe0\xbf\x1e,\xc6\xbfJ/b\xa0\x83\x07\xf6?\x0b\x92\xcc\xc5q\xaf\xd0\xbf\xdc"\xf4A\x17m\xf9?1%j\xfd\xd3?\xd0\xbf-\xca\x7f\x80\x8f\xfa\xf8?{\x8f\xffn}\xee\xbb\xbf\x01\xfc\xd8\x07w\xc6\xf3?\xecd\xb8c\xfc\xa8\xa0\xbf\x00\xc68>\x9f\x19\xf1?\xd7\xedU8@\x05\xa5\xbf\x93\xfe\t\x8a\xffb\xf1?\xa5\xec\xeeP]\x97\xc6\xbfNV\xd5\x19K\x8f\xf6?<<\xabY[\x06\xd2\xbf\xcb0s\xccM"\xfa?\xba\\\xaf8\xec\x8a\xcf\xbf\xb5^+(;\xdc\xf8?\x1a\xc8\x92\x94\xc5\x1a\xc4\xbf\xe7\xc2\xea\xf0WI\xf5?\x90\x9d:[\xa18\x83\xbf\x14)\xd7\tri\xf0?\xb6\xd9\x04\xfd\xb8\x80\xc8\xbf\xd8zN{\x8b\xc6\xf6?\x1a\x05\tE<8\xbd\xbf\x18\xd9!\xa5w\xc6\xf3?\x19\xb8\xf2\xfb\xdf\xb1\xc0\xbf\t\xa8\xa9\x81\x86\xde\xf4?\xeb\x88\x153h\xe0}\xbf\xdd|\nI\xe5E\xf0?\xc0\xae\xcb\xbf\x9en\xb7\xbf\xa8\xb7\x00\xbfGK\xf3?\xaet\x00\xe4\x01@\xcd\xbf\xe2\x16r-\xd5\xfd\xf7?\x96\xa6\x80\x1b\xac\xc5\xd1\xbf\x97^\xe8\x8e\xf0\xf5\xf9?\xeaf\xde+\xcf\xcf\xd3\xbf\x018_\x0b\xccR\xfb?&\x90w\xeb\x1db\x9c\xbf\x172\x9fJ\xd9\xcb\xf0?\x17o\xb0\xcd\x0e\xd1\xd0\xbf\xb9\x88\x81\xd2\x0bI\xf9?i\x1f\x92\xe7\xec|\xd3\xbf\xd9\x19Y@}\xe9\xfa?\x1c\xb8\xde}2\xb0\xc4\xbf|\x9c\x1c{O\x86\xf5?\xd9Y\x9b|M\xca\xcc\xbf\xb8\xde\xe7\xb8U\xf5\xf7?a\xda\xbf1\xf2\x10\xbe\xbf\xf3`\x9f\x82\x82)\xf4?\xa9~\x0f\xdf\x14\xa4\xc3\xbf\x05/\xb5I]:\xf5?\xc9F\xbd~\x02`\xd2\xbf\x01\x87\x11\xca\x85)\xfa?\x1f\xdc\x9a\x87\t\xe0\xc0\xbfq\x0e\xa7\xcd"\xbb\xf4?B\xc2\xb7\x10\xcd\x8c\xb0\xbf\x00,\x84\x88I\'\xf2?\x88P[\xc2E\xa6\xd0\xbf\xc2\x1e=\xb7\xc7+\xf9?<\x82%\xa2\x08s\xb0\xbf\x9bb\xd6\xc3-o\xf2?\xa6\xc5\xd5J\x1d5\xc5\xbf}\x97\xf9$D\xd5\xf5?60\xbc\x195\x06\xc9\xbfB{\x15c\'\xe9\xf6?\x18M\xde\xff\x99\xc2\xcd\xbf\xf3n\x84m\x8d\x17\xf8?\x1d\xc4\xf3\xec_m\xb4\xbf\xd0S\x10B\x88\xdf\xf2?iN"\x0b\xa9\xa0\xc6\xbf\x0c\xd2H\xab?-\xf6?E\xad\xcb\x07\x07\x0c\xd1\xbf\x1aSn\xf8S\xa0\xf9?@1\xf3[\x9b\x9b\xd1\xbf-\xe2\x99R\x99\xe2\xf9?<B\x15\xe7\x83\xdc\xab\xbf\xd8\x98\xb9*r\xbf\xf1?\xb5U\xfeuI\x03\xcb\xbfZa\xce(A\xd5\xf7?\xe1\xc9\xf2\xda\x1a]\xd1\xbf\xde\x0ev\xdb\x83\xd3\xf9?`\xd7\xf5\xc3\xefl\xd1\xbf q\xd3t]\xaa\xf9?M\xa8\xf88r\x02\x97\xbf7\xf1\xb0\xd8\xf4\xa6\xf0?'
p124
tp125
bag2
(g3
(I0
tp126
g5
tp127
Rp128
(I1
(I2
I237
tp129
g12
I01
S'\x18Z:\x13~?\xbc\xbf\x80\xef\x80\xc7mf\xf3?R*\xf1\xf7\xef\x9d\xf3\xbf6\xad\x9cX\xe1\xf7\x12@@\x97\x95\x88\x86\xb3\xd9\xbfv\xc0\xac\x128&\xfd?\x95\x8a\x8f\xb5?\xa2\xe5\xbf\xc3\r\t1V\xf7\x07@\xfb\xcb\x9e\xf5\x85\x02\xd9\xbf\x04\xd8\xbb)\x95[\x02@\xff<\x91\x19j\x18\xd8\xbfQ\xdf}\xc7I\x06\xfd?\xb5\x10\x84Z&wJ?]\x94V\xbd\xa1\xdd\xf0?\xeb\xc4\x9f\x15\x07\xdc$\xbf\xebJ&&\xcd7\xf5?\x02\xfb!\x8f\xa4\xd7\x8b\xbf2\xe3/SU3\xf1?tR_\xc5\xbd\xf0\xa4\xbf\x00\xc2\xa7j\x8d\x0e\xf1?\x9a$A\xdf1`\xaa?\x91\x0c\x7f<\xc8\xa2\xec?\x1d\x8a\xf3\xd3,\x82\x98\xbf\xbd\xe6\x8d\xcc\xe0\x94\xea?Lm\xf0\xe0]\x9c\xba?\x9a\xed\x01\xfc\x87\x9f\xe5?\xaas\x02\xd2\xf8c\x82\xbf\r[\xa5\xde\xb6a\xf2?4\xfd_E\xc4\x0e\xc5\xbfdG\xfb#\x00\xce\xf3?\x96\xc9@S^3\xc2\xbf\x82o+\xf1\x93\x90\xf2?l\x070\x14\xb0\xf7\xb8\xbf \x87#\xf8\xe8\xdd\xf6?\x02\x7f\xb8U\xdfQ\xab?\xb8\xed\xa6\xb7\x9b\xdc\xf3?G\xb7\x94\xaa\x8b\xea\x96\xbfh-\xec+\xde\xdd\xe4?i$\x8a\xe6\xe4\x94\xb5?\x97\x06\x9f\xc6!\xe2\xf6?<\x12\xad\xbf\x178\xc4\xbf\x80\x90{/M\x8e\xf7?\x08>\x98Ml\x82\xbf\xbf\x0e.\xe8=\xe5\x1f\xf5?\xbe-&\x0cw\x0f\xd4\xbfa\x96@+\x8e\xfb\xfb?s\xcc\xefa\xa5\xeb\xdc\xbf\x1f\xf6K\x0b\xa1o\x04@aZ\x13\t\x1eK\xd2\xbf\x91"\x1b6\x88\x15\xfe?\xf8J\'&\x86w\xc3\xbfh^\x0b\x873\x8c\xf3?\xdc\x8a\x83zPz\xd3\xbf\x8b\xaa\x9b\xd0\xe7\x82\xf8?\x96=\x0c\x9a\x0bt\xc3\xbf\xeb0\xf6I\xa8\xad\x00@\'\xd3\x02%}\xc6\xcc\xbfk\xa9&w=\x93\xf6?\x8dr\xea\xfa\xdd\x9a\xf8\xbf\xa5R_BR\x90\x15@\x9fM\xd9\xe2V"\xd2\xbfkmW\xd9\x9e~\xfb?\xb5\xb3\x94\xa2\xbf-\xb4\xbf\xd6.\xbbK(\xfd\xe6?\x0f\x15\xc1\xfb3Z\xd4\xbf\x86)J\x0c\xe7\x13\xfd?(\xde\xfc\xbc\x14p\xd4\xbf8\xee\xb03\xb9A\x02@1\x9b2\xd5P\xd4\x82\xbf[+M\xa8\x9et\xf4?\xf09m}\x18{\xb3\xbf\xd5_\xb8u\x0c\xcf\xf4?\xf3\xae\x8e\xae\x1fG\xd0\xbf\x194K\x8f0%\xf6?\x9c0\xfc,}\xba\xbb\xbf7\x85\x8f\x1a\x0fF\xf3?\xa3\xb5\xd9T\xb7\x92\xbd\xbfe\x8eYq\x01\xf2\xf3?\x01ThA\x06\xe7\xc0\xbf%\x1aF\'\xaa/\xf7?]_\xc9\xb5\xeb\xf1\xb8\xbf-\xe7`B\x86z\xf4?\xe6\xc8)\xf7\xc8#\xc8\xbf&8\xb4W_\xd2\xf3?\x13\x10:\xa1\xbd6\xe4?*\x1eR!\xe4*\xfc?cU+Zx}\xdd\xbf\xfe\x98\xec\xc1+\x83\xfc?\xa0\x8a\xebo@\xdd\x94\xbf\xe4\xdd\x97\\#\x16\xf1?\xb8E}\x906\x8d\xa7\xbfhun\xd1\x1b\xc4\xf1?gU\xa9\x1fk\xa2\x8d\xbff$\x08\xd1\xec\xcd\xf7?\xb1\xe8\xb4\xc7\xb0\xf6\x93\xbf\xf8\x81;\xb0\xa3-\xf1?^\xda\xca\xed\xe4F\xc3\xbf\x92\x18\xd6\xbf\x8b\xcc\xf4?\xefE \xba\xccjA\xbf\xd37\xce\'\x01e\xe6?\xbc>\xc9\xb0\xf5\xa3\xd1\xbf\x01\xb0Sa\xde_\xf7?\xac"\t\t#\xe6\xbd\xbf\x19\xcb\xe7b*,\xf4?\x19\xb3\xad\x81[\xe2\x84?E\x98\xdf\x8c\x88\xa1\xe7?%\xdaW\xf0\xc7\t\xac\xbfP\xca\x99A\xb4J\xf4?\xb8\xb1\x8e\xbc\x98\xd5\xb7\xbf\x9b\x8cm\x8b\x8aD\xe3?\xd8\x19e\x10\x84\xbd\xcb?\xf0\x0194S\xf5\xca?=A\xbc\xe6\x03\xa3\xda\xbfF\xe4\x80\'L\x93\x07@\xeb\xe3\xf7Sy\xe5\xb3\xbf9\xcf*\xedc\xcb\xf1?\x0f\x88a\x83\xcb\xea\xc1\xbf\xaf  \xc9\x96E\xf7?\xcaPi\xf8\x8a-\xe7?\x1b\x87K\xe2Z.\xf1?,I\xd6\x8d\x82\xcb\xb8\xbf-\x89w~\xbd\x8e\xf6?2\xcc\xe8\xa0\xb2\x92\xdc\xbf\xf9#\xa0[%o\xfd?u\x08\xabw\x1c\x0f\xeb\xbf{\xc8U\xba\xaaQ\x10@\xe7\x8d(W\x99d\xb0\xbf\xbe\x82k\xff\x02\xaf\xf1? \xebJ\xcb\x1c\xd5\xb5\xbf\x8d\xda~XhG\xf6?A"\x92\xee%\xae\x88?\xff\xd7\xdeS#U\xf4?9\x12{\x1cl\xb6\xde\xbf\x1fV\xfd\x7f\xee\xd3\x00@\x0e\xe33r\xd8\xc4\xb4\xbf\x06\xc7\xbaA\xfc\x93\xe8?\x0f\x88\xb5\xc8I7\xd2\xbf1\xf0JH;\xc4\xf6?\xd3\xc9\xb5\xab\xa7n\xb0\xbf\xb9\xd9O\x9b\xcf\x93\xf3?)\x05yA\x13@\xb1?\xfd~\xef@\xf6U\xe9?\xf1h\xef\xb7\x0eN\xa4\xbfO\xe9&\x82\x10\xfc\xef?\x1d\xad\x0e\x01G>\xd7\xbf\x1d\xf7o\xfdw\x17\xfb?||\xf2\t\x06\xb7\xad?\xa98\x96\xaa7\xa2\xf1?\x8cdz\x18\x93\x08\xd4?\x81\x02\r\xd3\xa3\xff\xe8?\x7fv\x13qB\xb6\xa2\xbfql\xa7\xcf\xa7A\xf3?PWF\xe5\x06f\xe4\xbfY\t~1\xe3p\x0f@\xd6\xc5M;\x10\xb9\xd0\xbf\xf1\xc1\xd5\xe4\xdc\xd5\xfe?\xacl\x9fp\x17\xbb\xd1?\xf4\x06\x8c\xfen\x8f\xbd?\\\xc3\x89\xc7a\xc1\xb8\xbf\x7f\xce\xf9\xd5>\r\xf3?\xa8\xce\xabH6\xb6\xc9\xbf8\x13\x18\x13\xf9,\xf4?AP\x1d\x9a\x92^\xab\xbf\xbe"l\xfdM\xe2\xf0?w\x1dL\x1a\xa9\xac\xc3?m\x98\xf1\xe6#\x80\x03@&\x0b$j\xe0.\xb2?S\xbb8s\xb7j\xee?\x13S\xea\xce+\xfb\xc3?\xf0\xb8\x06L]l\xf6?\x0cJe\x08\xe5\xa5\xd4\xbfU\x8f\xbb_\xe1\x86\xfb?V+\xa5~\xb5\x9d\xa2\xbf\x91\x9e\xb2C\xf8\xd2\xee?\xc0Q\x7f\x1a\xb7f\xa3\xbf`\xc3D\xd5\xd6\x99\xe3?\xfd\xca\xb3\x0e\x17\xef\xa7?\xdeI\x05\xd5\xd1$\xf0?+o\x93\xc2d\x89\x88\xbf\xa0gu.\x9eI\xf1?\x94\xe2\xefs\xaam\xd0\xbf(\x8f\xea\x1b\xf5k\xf6?\xc6\x84\xbc\x94\xfa\x93\xd5\xbfu\xa26SQ\xdb\xfb?P\x7fHS\x10\xb5\xc3\xbf\xda\xb5f\xc5\r\x96\x01@4\x1f\xb7?,\xe5\xde\xbf\xcc\xfd\x19\xeb7\x86\x03@\xb3"\xb5\x86\xecY\xc1\xbfLfC\x9b\x84\x01\xf7??O\x91\xcf\x087\xa6?X-\xf5\xb8\x83\x85\xe0?\xc4\x19\xe9|<[\xd2\xbf\xd7\xa2\xb69[\xce\x10@\x12@{\xa6}\xad\xa0\xbf\xb4\xac\\\xdd\xc1G\xe7?\xce\xe8l\x84\x00\x82\xa4\xbf\x1f\xfc\x06r\xe4\x16\xef?\x88\x19\xc7\x92\xb7\x7f\xd8\xbf\x08\xe4"0_\x93\t@\xe8>\xda\xb9,\xb8\xa3\xbf$\xeb\xa4d_(\xf4?\xbb\xeb\xd6M\xa3B\xda\xbfu<5\xeb\xf6\x05\xff?\xb3\xcf\xedG\xf72\xc7?\x80\xa1\xb3\x168k\xec?\xd4\x08\xaa\xca#\x1e\x92\xbf\x06 \x86\x91\x19n\xeb?\x83~\x19\xcf\xfc\xa0\xd5\xbf\xbd\x0e\xc18\x9d=\xfb?\x9b\x96y\xb3\xfa\xe8\xa0\xbf\xaf\x90|r\xcd\x10\xeb?T\xea\xc0\xee\xbc6\xd0\xbf\x1ci\xc84p\xc4\xf8?\xf3\x8a\x82\xba\x02\x8a\xb9?3\x0e\xd9\xc2*\xa0\xf4?\xecB\xd9W\xcev\xd5\xbf\xfa\x88\xce\xe4\x14g\xfa?\x9c\xbf\xab\xed\xd5\x16\xb7\xbf\xe9\x03\xe0\xa5R\xc2\xf5?h\x84\xc9\xd7\xac%\xc1?\xe7\xe0\x820\xd5\xa5\xe3?u\xbf3\x8e\xf0:\xc2\xbf\xc9\xcc\xaa\xba/\xfd\xf3?\xc3\x82\x96\xa9\x05\xc2\xca\xbf\xd5U\xd2-\x8d\x98\xf7?_\x0eVO\x0fT\xb4\xbf\x82\x95\xd6\xe5\xc88\xf3?l\xd7\xb0\xdaX\xf2\x9f\xbf\x1dEc\x19R:\xf0?\x1a\xe9\xa75O*\xa1\xbf\xe0\xf4>\xad8\x07\xf2?\x0817\x16\x05\xec\xc0\xbf\xe4\x8d\xb3\x9e\x93R\xf5?f\xc9\x80V\x8a_\xc4\xbf=\xcf\xd1\x15&S\x01@\xc4\xdc\x136T\xc1\xd4?\x87\x83\x8fiG&\xcb?_b\xf7\x89\xdf)\xdb\xbf\x05\x17(\xc3\x025\x01@\xd6\x83E\xe97\xa5\x90?6\xb9&\x8b\xbd\x83\xf4?\x1c\x8at\xee\xb5\xfa\xc0\xbf\x00\xc1\x88<_f\xf5?L\xd0\xb6J\x14d\xef\xbf*\xeem\xa4\xa6\x05\x10@\xc5\xe800a\xc8\xc4?\x05\xe1u\x82I4\xe9?,\xb4k\x89!5\xe3\xbf\x81\x94\xae\xa92_\x04@\tt\xb5+`\x08\xd3\xbf\xfd\xfb?\t\xd4\xcf\xfc?\x0e\x84\x88\xef\x00M\xc8?\xca\xe9G@\r\t\xc6?\x8c\xe3\x87O\\9\xd3\xbf\x9a%\xa6 y\xef\xf3?\xa2\xbe4lBe\xdb\xbf\xd7\x1c}\x1f,6\x00@\x9f\xad\xf4\xfc\xf6\xa0\xd3\xbf\xbf\xd7.oM\x8c\xfe?\x01\x8a\x04\xab%\x8fu?-\xce\xa5@Fy\xf2?M\xcd\xde\x14c\x01~\xbf\xd9Vl@0\x0f\xf4?\xa8i*\xda\xf3\xbc\xaf\xbf]\xca3\xb3\\\xfc\xf1?Z\x1f\xdb\xc2&Z\xc0\xbfF\xa4qk\xae\xe4\xf3?\x8dV\x8c\x94\x0ej\xe0\xbf{\xb6A\x07O\xd6\x01@\x07r\x84\xc5\xdd\xac\xd3\xbf\x8b2\xfb\xb3C.\xfe?jq\x8eE\xca\xa5\xe5\xbf\xb9\xef\xca\xca\x16\x8a\t@wk\x04j\xdc*\xd7\xbf\xb4s\xbft\x8b\x07\xfa?u\x1b\xa5rr<\xef\xbf\x8c8\x00#a\x0b\x13@o\x19\xc7\x13Q\xcc\xcf\xbf\xfe]\x9e\x0c\x143\xf9?\xbe~\x189\x8d\x99\xd6\xbf\x93\x8c\x8c\xd4H\xa6\x01@?Uo\xe4\xd1,\x98\xbf\x91Y\x17\xc7\xf2\x0f\xf2?N_\xc2\xa6\xc8\xe0\xd5?_\x8ah_\xb4\x0f\xf5?\xd6-\x9d\xe0\x88t\xc8\xbfjS\x97\x9a\xb3/\xf8?A\xae\x82\xaa\x9f\xd0\xd5\xbf<\xfd\xc0)\x02\xbe\xfb?\xba\xd3pz\xb5\xf5\xd9\xbf-\xafo\x9ao\xec\xfc?\xe9\xb4\xd0CZ\xbf\xdd?\xa4yNG\x05\x0e\xe1?\r-\xd2\x1b\xd0\xb8\xc2?_\x8fi\x94>~\xf2?\xd93\xber\x1f\x88\xa8?\x14?\xad\x9a\xe8\x7f\xf1?<\x1dA\xfa\x93\x02\xc1\xbf\xb4\xfe\xb2\xc0\x0f\xed\xf0?\xcc_u\xa3\xfd\xae\xf0\xbf\xc8\xff\xb5\x01AG\x16@\xb5\x94\x8f\x05g\xe2\xb5\xbf\x18<\x01\x1fb\x8c\xf0?7\xac\xfd\xc7\xeb9+?\'\xf7\xc3\x16\xfaQ\xf2?P}>\x0cb\xc7\xc6\xbf\xaf\xfb\x7f\xa1\xe9\x03\xf3?\xf7\xb0\'\xe3\xa8=\x93\xbf\'\x14\x9c\x9djd\xf7?4]\xc0\xa3n\xbc\xd5\xbf#\x99)\xd8\xe6z\xfd?m3\xef\xcfSo\xd1?\xbe\r-7\xc3K\xed?u\xde4\xe3\x92\xee\xae??\x1eQ\x8d\xa6q\xea?|\xef9y\x07\x9b\xd4\xbf\xc7\x18sZ\x9c2\xfe?\xfc\xf1\xacG\x92\xa9\xa7\xbf\x0fr\x1a\xbap\x85\xf7?\xd7\xf2%\xac\xba2\xa1\xbf\x1d8\x1em\xbf\x04\xf1?\xec.}B\xd1\xa6\xb9?+\xe2\xa4\x1e\x07\xd4\xed?q\x94vc\x9d\xfa\xbf\xbfif\x83DMy\xf8?\xc8\xc3\xffr\x9bg\xb8?\x06\xf7\x07r\xff\x1e\x03@)w\xd4\xe7\xaf\xdd\xcf?%\x03\xedm\xc6b\xf3?$\x015@F=\xe1\xbf\xdd\xa1\x0c\xc3\xbd9\x05@k\xdd2f\xb6\xc2\xd9\xbfB\xea/W\xbev\xfe?\x05y\xae\xab\x8a\xb7\xd9\xbfi\xe9\xa0\x17?\x9e\x00@\n\xed\x05[\x0fA\x95\xbf\x87i\x0f\xaf?\xfa\xf3?\x95\xdc^\xa8)\x9c\xd6\xbfo&U\xcb7\x8d\x06@\xb8\x14\x0ek\xff\xc5\xb7\xbf{\x94mF:\xf9\xf5?\x9aG\x91\xc1\xe1\x14\xe7\xbf!@_\x91\x0f\xbf\r@a\xbd\xcc\x01(\xb8\xce\xbf\xb5E~\xe8\xf9\xc5\xf2?-\xacg\xac6\xde\x8c?\xff_E"\r\x10\xf5?\xf8\x82!\x88a\xde\xc4\xbf\xba\x17\xc5UN6\xf9?\xc1\x177\xdcW\xed\xc1\xbf\xd7\xff[c\x8e\x1e\xf7?p\xef\x10\x87Xw\xbd\xbf\xcc\xfc\xb6t\x88\xd2\xf3?\x82\xfc\xb6\xc3\x9f\xd8\xc4?k\x8e\x04\xce0\xae\xd7?N[MH\xc1\x8f\xa1\xbf\x024\x12\xc0\x06\x9a\xfb?\\\x008\xc8\xb3\x07\xc3?\xc1R\x8f\x8d.\x0c\xea?\xf7\xa08i\r\xc0\xe0\xbf\xf9\x82SDj\xaa\x00@\xbb\xd3xx&\xae\xcf\xbf\xf2\x18\xf6\x9e\x01\x0b\xff?\r\xeb[R\xa2\x89\xd9\xbf\xc4\x19\x07\xf9\x91\xdb\xff?\xa2>\xfen~c\xf8\xbf\x9b\x83W\xf0\x8f\xff\x17@4\xe8dc\xca\x9e\xd7\xbfX\x0e\xff4p\xd5\x01@\xa8\x18R\xa0?\x06\xcc\xbf\x02\x1as\x05\xb7\x89\xfb?\x82\x17\x1c\x1b\x9ej\x9e\xbf\xd5$\xeftN\xa0\xf0?\t\xd1\xcd\xd8-+\xd6\xbf\x83l\xfe\xbb:S\xfa?_\xd5\xd4LC\x0c\xa2?\xc0\x1b\x90\xce\xfc\xcc\xf2?\x80\xd0=Zf,\xb5\xbf\x00f\x89p\xe4\xf3\xf2?\x1e\xd2\xc2BxU\x97?8>c\xd3U\x87\xf2?\xdf\xa3\x0eP\x13(\xba\xbf\xe3\xd4\x18\x85Ju\xf3?\x0c\xd5\xd4\xe9\xf9Y\xd2\xbf\x92\x95\x8b\x95\xd55\xf5?E\x0bJ\xf8\x8e\x0f\xd1\xbfP\x12\xa8b`\xf3\xf5?$LJ\xf4\xee?\xc8\xbf(\xcaOvu,\xf0?\x13\xbd\x8b\xf4#\xc6[\xbfd{H\xf7\xf2c\xf2?\\/\x9f\x0e\x1d\xbc\xda\xbf\xc2\x1a\xc4\x02\x90A\xff?y\xc9Q\xcds\xc0\xcf\xbf^\xab\x96\x97\x8d\xdd\xfc?E\xab\x9a|\x92\xca\xc7\xbf\xb0C\xcb\xff\xa2?\xf4?A\xe6\xa33]\x07\xd2\xbf\x06s\nC Y\x01@\x8b"V\x9fT\xc7\xca\xbf\x9b\t\x97\xd2\x0c\x19\xf7?\xb5\xdf\xe3V\x85\xb9\xb8?,!\xf7L!\xe8\xe0?79\x02\xfc\xc5\xce\xb1\xbf-\x92\xd9O\xd2\xe4\xea?D\xb3\xb1vC\x84\xc0?~lh\x02$F\xd3?G\x02\\\xf8\x85F\xd2\xbfq\xc5\x01[\xa2p\xf9?\x0f\xa0\x9a<\xe3@\xb1?|\x13\x08\xcb\xa2h\xee?\x1d\x1c\x0co\xe6\x19\xc5\xbf \xf2eK\x842\xf6?o\xa7\xbbc7\xe8\xc8\xbf\x1e\xd5\xea&d\xb1\xfb?e\xba\x10\x8f\xb1\xe8\xc6\xbf\x0b?*\xd4\xbbE\xf8?\'`\xc6\xb1\xe9\xa1\xda\xbf{\xbf\x9d\xcb5&\x06@5\xb4\x00\xbe\x1c\xba\xa7\xbf>\x1ao}U \xec?]L\x08\x8b\x81\x12\xd6\xbfB\xea\xe2\xd7\xf9\x1d\xfb?[O\x83d\x1el\xe0\xbf\xbf4\x9eA\x01\x86\x02@L\xa8\xb9M\xec\x9f\xc0\xbfwf\xa1\'\x00*\xf4?\xd9b\xb3\xab_+\xc0\xbfh\xe3\x0e\x1e>\x1b\xf7?\x17\x899p\xd8\xb6\xd2\xbf\x93\xd5&kMB\xfc?[\xa5\x95\xdf!O\xd4\xbf\x18\xb4\xd3E\xcfC\xfb?\x94s\x82=,\xed\x93\xbf\x01\x02\xc8\x9d\'>\xf1?5\x7f\\\xe7x=\xd4\xbf\xfc\x11\xde\xbd\x9e\x1b\xf7?W\x83\xd0\x8c\xc6\x03\xa0?H\xe20\xc6J\xc2\xf0?\x12\x8c\xa9\x8a!D\xd6\xbf \x0f\xa3\xc0\xf3@\xf6?\xb0\xc0\xedv<.\xe7\xbf\x06\n*\xcc\xb9\xbf\x08@\xa0\xfeJ\xd8\xa1^9?#0\x10\xa3\x9d\xf7\xf0?\xcb6p\xe6\x0b\x96\xb6\xbf\x8b-\xec\xfeo\x83\xf4?\'\x83;\'\xb8\xca\xb3\xbfa\xac\x88\x9csD\xf3?\x81\xa7<7_\x95\xc5\xbfE\x1c\x8b\xc6\xe0u\xf5?\xea\xfdO\xc4\xdd\x00\xe7\xbf\xdb?f\xf9\xdaE\x08@\xbe\x85\x95\xc5BY\xc1?\xd3z_\x88GL\xf0?\x8eej\xberJ\xce\xbf\x0f\xab\xa2\x1c\xeft\xf8?\x89m\x8cF\xf4\x99\xe0\xbf\x8d\xb0f2\xf4{\x02@\x97\xe30\xcfB\x94\xd3\xbf\xc7\x11\xc2\xc2\xe9\x92\xf8?\x0c\x8d(Z\xcf\x17\xb5?\x9d\xabB\xbc7\x98\xec?h\xb0\x0f\x14\xb7Y\xe1\xbf4p\x92\x7fo\xb4\x01@\xeb\x14\xd2JOm\xae\xbf7\xfa?\x84t`\xf6?\xdcz\xe2\x00\x10\x04\x92?1\x06!r\x87L\xf1?\x9d.\xff\xca\x949\xb3?\xdf\x16j\xcb&\x0f\xf9?g\'\x93\xad\x9a)\xc2\xbf\x87\xf0%\xc2\xfdr\xef?'
p130
tp131
bag2
(g3
(I0
tp132
g5
tp133
Rp134
(I1
(I2
I421
tp135
g12
I01
S'\x99\x98\x83U>\xb0\xa5\xbfC\xfc\x9a\xd5\xa4j\xf8?\xb5\x8d;\x12\x1b\xe1\xd7\xbf\xdc\x05\x95\xde"O\xf8?\x15\xab\xd9\x11\x06\x99\x91?\xfb\xe7p\xb7f\xf0\xec?\xc9\xf5pF(\xb4\x93\xbf\xcb\xaa\\m\x89x\xf9?f\xbb\x87w\xca\x07\xa2?~\xca^\xce\xb3\x1f\xe9?\xd1<-\xae\x03\x16\xae\xbf\x18%dJ\xbc\xc0\xf6?\xe9*\x06\xbd\xe5\xf9\xad\xbfi%\x1eyy\'\xf6?\xb8\x08X\x98\x10\xa6\xb5?\xf9\x0cj\x97\xa7Z\xe6?\xd2\xe6\xe5H\x90\xfd\xd1\xbf\x96\xfb\x99G\xae6\xf8?N\xf1\xd9P44\xdc\xbf\x00\xce\xce\xb1re\xf9?)\x84Y\xf0\x05\xe1\xc0\xbf\xef\x91\xa7J\x1fg\xf1?exS\x97&\xab\xd7?\x11\x8a\xa7\x8a\x93\x96\xed?\xcb\xb5;\xba\x1e\x00\xd8\xbfH\x97\xe7\xc5$\x02\xff?\x88\xcc1\xfb@i\xd9\xbf\xd3v\xcb\x11\xa4\xfa\xfe?;\x00\x16x\xd7\xb2\xd2?\xfb\x9d(L\xaf \xff?,\x8f\x04\x9f\xc1d\xd0\xbf\xc7\xda\x94\xad\xb6\xd8\xf0?\xaf\xbd$\x0b\xbbm\xc0\xbf\xf8\xa8\x7fM=\\\xfa?\x83\x11\xed\x8eAm\xd5?\xb9(=\xf5\xfb\x8c\xff?\x9b+\xca\xdb\xb5\xec\xc1\xbf\x12%\xcf\x10%\xe1\xdf?\xd2\xa9=\xb2\x19d\xb4\xbfhY<\xd6T\xb4\xea?\xda\x9a\xc1\xda6\xbc\xc9\xbf\x19\xbdf\xd9\xb8j\xf1?|\xc0\xad\x0e\xd3o\xc5\xbf\xd1.\x92\xf6\xe4\xc1\xf4?\x07\xea\x0cI"!\xb3\xbf8\xbb\xa6\xbc\x8c>\xff?\x13\xb2\xa0O0\xc2\x8a\xbf_\x0b\xd7(6\x15\xf3?kS\xc6\x90f\xd6\xcf\xbf\xd9\xb3\r\xc9\xe2\x86\x01@\x16?\x06C\x81\x85\xa1\xbf\x9ac\x87[\xe0\x9a\xf0?0+.\x1a\xb0\xab\xb8\xbf\x95\x02\r\xda\'\x94\xed?Kp\xb0\xb6\r\xbc\xcc\xbf\\\xa2\x106\x1a/\xf3?\xa7GG\xbav\xf3\xc6\xbf\xb62\x01ElC\x01@\xbd;\xec\x1c\xbc\xf1\xab\xbfC\xe0j\x91\xeb\x7f\xf4?\x12\xd6Y?\xf4S\xb2\xbf\x04\x01\x063-n\xef?o##\xe8\x08\xe5\x80\xbf\x98\x8e\x0c\xc1\x02\x0e\xeb?\x95c!X*\x05\xe6\xbf.\x99\xf4\xe2\x0f\xc1\x07@\x031^j&\xbe\xc0\xbf\x8fU\x9c~d\xc2\xf5?F\xbf\xc2n\x02\\\xc7\xbf\x02\x8fnH2\xf2\xe8?E\xc5\xe4G2\xca\x94?\xa2\x14\x91\xc8cM\xf5?\x07/Dj\x87\xd1\xc7\xbf\xf3p\x0c\xa0\xe8\xa2\x02@\xf4\xf8\rs\xa6\x96\x83\xbfg\xad{\x11gX\xf1?.\xb7&\xb1\x845\xc0\xbf\xf6r\xf57\xe6\xef\xf0?\x86\x05\xbf^l\x8e\xc3\xbf\xbb\xee\x96\xae\xc67\xf6?\xbd/>\x1cQ\xcd\xbf\xbf\xf4\x82,\x0b\xcf\x0b\xf3?\xb2\x07\x1f\xf5\xb8E\xc1\xbf\xf3\xc9\x7fg\xf6\xcc\xf5?\xd3A\xf0\xebh`\xd2\xbf\xbfr\x85?\x88\x89\xf6?S\xa7\xbd\\\xf03\xc1\xbfl\xe7.C\x15\xc7\xe9?\xdf\n\xed\xdap[\x82?\xee\x9d\xcd\xcd\xb1\xd4\xf3?2g\x86n$I\xd2\xbf\xdf\xcf-j\x12\x1a\xfa?N\x95\xda\x8f\x1c\x19\xc5\xbfZ\xd0\xad\x17\xc6\xb1\xf8?\xcbeU\xb1\x85\xf1\xc5\xbfe\xca\xe1\xa3\xb1\xaa\x06@\xec59\x13\x1eZ\xb2\xbf\x02r\xecQ\x1c*\xf4?>k:\xd5\x8bd\'@P\x0b<\x06\x99\xbe5@;-\x9aB\xa2|\xb3\xbfv\x98\x88\x01\x97c\xf2?\xe8H\x16\xd1\x11V\xd5\xbfv+o\xc1|\x11\xfe?+\x0cP\xabw&\x9f\xbf5c\x1b\xfa\xac\xf7\xef?cH\x01\xf7W\xdaq\xbf2\xc5\xfe\x1b\xdc8\x97?<\xf8\x88\x0f\x97\xdd\xa8\xbfl\xf7M\xfc\xea\x0e\xeb?\xf1\x8c\x0f\xc4G\xe0\xd2?V\x893K\xc7-\xf8?\xa1\xc7\x10\xb2\x1e\xdc\xc2\xbf\xa8aE\xf0\xd8\x8d\xf2?o\x9b \xd6\xfe\x8b\xd2\xbf\xc2\xa3!\xe1\x93\xc6\xf3?\xd5\xc6\xcf=\x1e\xf4\xb1\xbf\x0f\x9d\xff\xb6\x9d<\xf6?\xa0\x12\x05\x9c\xd8\xb3\x9f\xbf6*\xcd\n\xfb\xb9\xf2??\x86OI\xec\xdf\xc7\xbf\x98\x04\x9f\xc11\xd8\xeb?\x0fe\xdd\x0ct\x8c\xa7\xbf\x0e\xac\x88\xe3\x99G\xf2?\xc6~\xab\x8a~p~\xbf\x05X\x8fg\x95k\xf5?)\xef\xafE\xe0\xd1|\xbf\x83j\xe7\xe0k\xe6\xf2?\x05\xe5L?{\x9a\xc6\xbf\x0cA\xe44\xa9$\xf0?W\xbe\xb2\xa4\xad\xef\xd4\xbf\x9fa\xc2\xcaR{\x01@\xe1\xcb6J\xd4 w\xbf\xc5z\x92\xbb\x01\x17\x00@\xb7\x0b1\xd8\x7f\xfa\xc2\xbf,\x18\r\xf5y\xb2\xf7?|\xa8\xe3<\xa4\x01\x84\xbf\xba\x9e/8\xdcr\xef?\xab?R\x88&;\xb9\xbf\xf5+C\xe4\xd3{\xf3?\x8f3\'\xb5?\xd1\xc0\xbf\x0f|\xf6\xcc\xf9K\xf1?\xdd\xf0\x1b9\x1f\xf1\xe9?\xd5-\xa5V2E\xf4?P\x93?\xa57\xd1\xc8\xbf\xa7D\xefu;\xca\xf1?\xd0KF\xac\xfd\x01\x81?9^\xaa4\xe5z\xeb?q\x93\x11\xd6\x83;\xa9\xbf\xb4\x91\xc9\n\x83\xda\xf8?\x88\x01g\xf1\t\xe5\xd0\xbf6\x1e\x00\x041\xd1\xee?\xf2\\\x004\xf2\xf8\xb9\xbf\xd3\xba\xa4\xbbP\x08\xfe?\xf7\n\x11\x7fW+\xc7\xbf\x06u\x01*\xa4\\\x00@\xba\x91\xbd53\xe0\xa1\xbf\xcaHP\x19\xf7N\xf7?\n\x14@\xba\x0fc\xc3\xbf\xac\xe6\xdaT\xd6@\xf7?\xc5u\x93\xd2\x19\x94\x89?p\x8b\xccT4\xb6\xe3?\x12\xc3\x1b\xa1\x15\xec\xb4\xbf\xb4\xf7\xa5,%\'\xf4?\x96\x0c\x8f\x84\xd9{\x94\xbf\xacU\xdf\x89\xf8e\xf1?X\x82\x7f"\xc1\xaa\xd5?\x0e\xabv\xc7\xbc\xce\x06@X\x1ag\x13u\x03\xc4\xbf.U\x00;\x1c;\xf8?\xe9\x91\x90V^q\xcd\xbf\x83\xb9\x18\xab\xb3\xf1\xfa?\xa7\x85J\x9f\x8fH\xba\xbf6)\x9fi\xe9k\xf5?S\xa8M\x15G\x8a\xca\xbf\x81\x9e\x08\xe4$\x04\xf6?y\x84m\x95C\xf2\xb2\xbfT\xf8\x19m\xd8\x1f\xf0?\x07\x81\xdah\x8e\xc9\xd9\xbf\x85\xdb\xe5\xbfN>\xff?\xac\xb0\xec\x1f\xc4\x16\n@\xdc\xd33\xbf\xef\x17\x10@\xf9j\xbaT\xb6\xc3\xc0?\xb6\xde\xe9j\xbc\xdc\x08@\x91,%Ckm\x9e\xbf\xad\xcc\x97\xef\x01\xc0\xed?>\xb3D\x96po\xb3\xbfqW\x81\xad\xc0]\xdc?5MZ\x92\xba\xa0\xd0\xbfT\x8c$\x00\x99\x00\xf8?\xe9\xb9q\xae!\xd3\xa7\xbf\xe9\x91\xad\x17\xbbI\xf8?\x9fY?\x80.\x10\xc0?=2\xf0D\xed\x1e\xf1?!\x83l\x92\xf53\xa4\xbf$\nx\x7f\xb5+\xf4?[X\xd8\xd4\x9a\x9c\xb1\xbf\x81\xb9\xf0L\x8bs\xfc?q\x94:!\xd2y\xfe?\xd9\x07x\xdeh\x87 @F\x8e.F\x1aj\xa8\xbf,+B\xa1\xb3\x7f\xee?.+R\x04\xa9\x1a\xb8\xbfR\x93\xbe\xf8T!\x02@\r\xba\x1c\x98\xa8?\xd5\xbf\xceS\x0c\x1b\xcd$\xf7?g\xa3\x92\x8d\xf8\x05\xcf?\x13\xf7\xf2}\'\x8e\xf7?Z\xb7hm\x0e\xfa\xb0\xbf4\x90j1\x02e\xf4?B\x7f\xc4\xab\x8c\x89\xc1\xbf>V\xd9\x93!\x92\xf1?\xe5\x0b={\xed\xaf\xce\xbfZ\x95mm\x8c\x0c\xf4?\xb4\x19S\x1d2\x1d\xd8\xbf\x1f\xc3\x1c%\xca\x0c\xf9?\xe1A\x80\xc7\xc1\xf6\xcd?\xa9IQF\x9c\x85\xe5?\x92\x18\xf1\xd6~d\xd7\xbfJ\xd3\xdf\xd0\x1b\xd3\xf5?\xa3\xd1\xd0\x1e\xff\x9a\xc8\xbf\x07\x15\xaf\x92\xbc\xf9\xf2?\xbc\xff\xd5>\x10\xdc\xca\xbf)H<\xa2\xac\xfd\xf6?v\x15C\xbc/%\xd0\xbf\xa7\x84yY9\xcd\xfd?\xe1\xe8Z\xbc7\x91\xc7\xbf\x01\xcd[\x934\x92\xf6?\x14T\xd4\xc97C\xd6\xbf\x8f\xac\x1e\x89\xc1G\xff?\xd1\xce\x06\x13\xb7&\xa2\xbf\x9dq\xbdxJ\xa9\xf7?u\x97\xb2\xbd\xe8)\xc4?]E\xa7T\x03\xdb\xd3?\x7f\xd9\x810*\xab\x81?b"8(\xa4\x1f\x00@\xd3\x08p/\xce\xef\xcb\xbf\x91\xd2\xd4D\x86\xec\xf4?\xd4_\xb3\xd58\x9c\xa3\xbf\\\xf8\xc5\xa7\x99\xfa\xde?\xc2\xf9\x89\xa7\x89\x92\xc6\xbf\xec\xfd\x95;\xbe\xb4\xf8?q\x13\x8a3;X\xbc\xbf\xf7,}\xc8u\x96\xfd?f\xf5\x0c\x07\x1d\x01\xbd\xbfos\xa2\x00\xe0@\x11@\xe9\xa5\xd6\xfe\x1f\xdd\xc0\xbfZ \x03\xa4.\x1f\xf9?P2\x82\x7f3\x96\xd6\xbf(\xac\xa3Y\xe4L\xf7?\xae3\x1fB\xcf.\xc5\xbf\x8c-\xc5F\xd2\xcc\xfa?r\xac\xf8\x9c\xd6q\xba\xbf0b\xcbr\xbaY\xe6?\xc4I\xe4\xc7^\xee\xd1\xbfU\x10s`:\xee\xf6?\x03TL\xd5\xb9|\x93\xbf\xf8#\xfdXQ\xca\xed?\xf0\x1d3\xb3\xf6\x83\xe7\xbfLo;\xddz<\t@\xc2B\xf2\x17\x16\xec\xb5\xbf\xc9\x9c\xc6]\x93l\x0e@\x95\xd9\x0f\xa7\xe8x\xe6\xbf\xcf\xba1\xe4Z\xbc\x07@\xc3\x19"\x11\x9d\xe2\xc3\xbf\x1b\x0c\xfa\x92%i\xfb?:\xf5\xfe\xc0H*\xd2?\xb0\x81\xa1\xac\xb72\xf2?\xc7\x87\xb7+l\xe3\xc1\xbff\x8dMv\x9d\xcd\xe7?@\x98:\x00\t\x8e\x03\xc0\xfb=\x9b\x80\xbaa\x1e@\xd89\x1d\xdfMp\xc5\xbf\xf5\xca\xb0\xdb\x042\xf4?\x8d0~\xda^\xfc\xa3?\x9c\xf4\\"\xb3\xcf\xf0?\x10\x14\x04\x85\x81\x1bd\xbf\xd89\xcfP\xf2\xd1\x01@&\xb7\th\xef"\xcf\xbf\x06>\xd9\x98l\xf2\xf1?=^\xcf\x96\xb7\xdd\xda\xbf\xe0\x07\\\xe8\x06\xbb\x04@\xd7!<\x9aG\x86\xb2\xbf\xddM\xd0g\xc4]\xf4?\xad\xa7\xa1.H\xcb\xc3\xbf\xde2\xb4\x89\x14\x8f\x03@[O\x03\xceo\xfc\xbe\xbf\x9c\xa2\x16\xabMr\xf5?\x95\xad@U\xd6M\xbe?\xfa\x10Y\x93#\x05\xef?##\xdd&\xb4s\xc8\xbf\t*\xf7*y\x19\x03@$\x90\xcc $\xf4\xac\xbf\xfe\x7fm#&\xe2\xe9?-\xeb\xb6\xcaO\xc4\xc2\xbf\xe0\xda\x9f+S\xc3\xfc?\xdbAQ\xa7@Fr\xbf`<\x1d9k\xb1\xf4?\xd1\x83\xe5\xde\xaf`\xb0\xbf\x8c\xcb2\r\xcc\xba\xf7?>\xc6\x91\r\x0f\xb5\xa2?d$\xf9\xe5\x18\xeb\xf1?L[V\x8e^\xd0\xe7\xbf\xb9\xc2l\xd5\x08\x10\x07@aeu\x13/\x05\xd1\xbf\xa6S\x10z\xd2\x80\xf7?\xa0\'\xb6\x14\xcbs\xb3\xbf\x1f\x99X[P\x81\xf7?\x08\xcc\x96\xf5\x1b\x07\xd9?\x92\xb5q]\xc4 \xec?\x17]\x063^\xa2\xd2\xbf\x18\x89h\x0ei\xb6\xf4?\xbfrR|\xd1\x1f\x8e?N\xb8\xd4K\xe1\xdc\xf4?%\xfdEi\xcd\xd9\xd1\xbf\xbf1\xca\x19\x18E\xfa?\xf5\xcf\x93\xa3\x01\xab\xc3\xbfx\xd1\xe3S;\x99\xfa?\x03`\x89\x99\x07\xb0\xc2\xbf\xf7\xa4\xf1+Q;\xf9?\x92p\x07\xd2=\xf8\xac\xbfq\x16\x97\xcc\xbd.\xf0?u\xbdW@l\xbe\xd2\xbf\x0c\xc5\x01#\x99\xa3\x10@q~N\xe7\x18G\xd7\xbf\xb1\x00\xb1\xd3w\x90\x00@\xa8_3\xd8\x80:\xd6\xbf}\x00\x80G\xa3\x84\xfa?\xd9\xae^\x8b\xe0\xc8\xc0\xbf&A\xcb-\xcc,\xf9?5\x04\xb92*\t\xcc\xbf\xcf,\xdc\xa7\xd8\x16\xfa?\xc8\xaf\xbab6\xc1\xd2\xbf;\xa7\x99\x07\xe5o\xf5?\x93M\xd0\x9e\x98\x03\xcb?4\xe2\xabKA\xeb\xfe?\xd2l\xb0\xa5\xcd\xec\xab\xbf\xee\x83\xc5i\x17\xcd\xf7?\x0c\x82\xd7\x1b.\x96\xd1\xbf\x99\xe4U\x11x\xcd\xf8?7\xf2>\xa0B\xb3\x98\xbf\xacou\x1b\x7f\x11\xbd?\xee\x88\x1b2\xecx\xca\xbf|\x18qk\xae\x84\xf3?\xd2o6\x96\xce\x08\xa1\xbf+\n\xd07\x83-\xf5?\xec|\x9a\xe8\x08;\xb5\xbfU({[\xa4\'\xf9?\xb8\xe2\x8d\x87-Q\xc1\xbf\x8b\xe7\x1f\n<\x9f\xf0?m\xc9Nd\xb7\xc4\xe1?l\xdae\x87\x8f\xb6\xfa?\xf9\xbe\xca\xf6\x1d\xd1\xc7\xbf\xd98>\x13\xf7\x99\xf2?\xcek\xd3\x13|\x8a\xd1\xbf\x0c\xa6"\t\x9a\xee\xf3?\x93\xb1o\x06\xc3\x94m?L\xd4\xc0\x1b\x9b~\x03@\xff\xed\xf4h\xa4\xf8\xb8\xbfZf\xf95\xd0\x8c\xf7?\xf9\r\xb8y\x95\xd9\xb5?U\xd4\xbc\xdc[\xc0\xdd?2\xa9\x9a\x1cl\x90\x96\xbft\xc5+\x10\x17=\xde?\xb4\xfe\xa77kW\xb4\xbf8R~"_G\xde?3\x88\x98\x16\xbcq\xbb\xbf\x82i\xd2x&\xea\x06@\xd8\xc0L:0a\xc8\xbf\x13}wx?3\xf3?)\xa7/4\xb3\xd2\xaf\xbf\x8bQ]9y\x08\xf8?A\x10~\x020r\x12\xc01\xbeFa\xc4\xa06@\xd4\xd2\n\xeesX\xcc\xbf\xdbW\x12\xb1e\xed\xf6?5\xb4p&\x8f\xf5\xca\xbf\x1b\xf8\xd1\x9c[\xe4\xf8?\xfd\xd3\xa6\xbb\x89V\xc4\xbf\x8c\xdb\xdb_\x10y\xe9?\xa9s\r\xc5s\x8e\xc1\xbf\x19\x1fh\xdf\xc7P\xe7?\xb6\xad\x8ar\x8f\x80\xc3\xbfffL\xb3\x88\xe6\xe0?\x18\xc0s\xfe\xcc\x8d\xd2\xbf\xb1\x0b\xe1(\x89\xe3\xf1?0\xefT,i\xa9\xc1\xbf0\xfa\xc97%\xe5\xfb?\xc3\xd6\xe2\'\xc9\x07\xc0\xbfg\x9d\xdd8o\xcf\xf8?/\xae\x074\\R\xc6\xbf\xee\x05&\r\xeb\xe5\xf8?m\xbf\xc7\x0e\x8fx\x7f?\x15Gt\xfe\x94!\xf6?\xaaw\x15\x13Z\xe4\xc4\xbf\xef\xbf\x18,\xf4\xa1\xf4?XR;\xa4id\xc8\xbf\x99\xeb7\xa5\x17\xf5\xf8?{?\xa6\x9b\xca\xfe\xa0\xbf\x89g\xf4i\xb0\x9a\xf0?\xd8o\xe1\x00\x80\x9c\xb5\xbf"\xecmm\x19\x81\xfa?\x15\xee\x0fTYt\xb2\xbf\xfd\xb3\xe2A\xf1\x7f\xf7?U(\xf2\xa8h\x0e\x8e?\xb0o\x84\x99\xf27\t@\x14\xf8rNP\xcc\xc0\xbf&\xef\xf7E\x00\xe9\xfa?-\xfe}\x08\x16\x0er?\xac\x03\x1b`o\x11\xc1?\xfd\xd7\xdch\xc6\xf2\xa2\xbf\xaf\xd0j\xc9\x9cs\x12@\x9c\xcdh\xb24\xfd\xc3\xbf\xf6,Pk\xabA\xee?M\xb9CB\xcfQ\xe8\xbf\rB\xfb\xf9\x868\r@\xea\xf4\x1b\xaauu\xf6?\x8f\n\x01\xa9\x99\xb2\xe8?GV\x90D,?\xc6\xbf\x85*F\xc6\xa8i\xed?\xb6P\xe5\xacR\x17\xc6\xbf\x11(\x8bl3\xe6\xf0?\xe6r\x87\x19\xa4P\xc5\xbf\xe5\x94\xfd]\x08\xbe\xf0?R\xa0h\xad&\xd2\xc2\xbf\x83^\xa8E\x9e\xc5\xf5?J\xe29}\x9b\xa2\xe1\xbf@I\x8d\xdd\x00\x05\x0e@0\x11!\xa4|V\xc2?\xdeI\xa2\xe0\xc5*\xf8?\xd6Opd\xe5\x99\xa6\xbf\x8d\xa9\xc3\x0c\x82;\xe9?~\xfe\x04\xb7\x9c(\xc0\xbf#\x9d\x9dEg\x81\xe8?\x8f\xa6\xe8\x93}\x7f\xaf?\x0bsF\xe1\r\x1f\x01@%\xed\x04\xe7\xd4K\xca\xbf\xb3r\x98\xa8 g\xe9?v\x04\xfb\x0b\x84\x01\xbb\xbf\xb0~\xed\xe3\xbbS\xf5?#\xa4\x8c\x10\x1e+\xd8\xbfp\xa2\x81\x03\x84\xff\xfe?\xaf\xdb<y\x7ft\xbc\xbfW\xb4\x9a\xa7\x1a\xab\xf0?\xa3\r\xdb0O\xbd\xdc\xbf\x82\xf5\x11\xe1{\x84\x06@\xb2\x02\xe08\xe1\xc9\x9e?\xc3\xa7L\xa0r=\xf3?\xf8\xd7\xd2\x1d +\xbb\xbf\x86Z\x87E\x0f\x07\xef?\x05Zx+\xdb\x17\xb6?\x1b20\xb1\xd6\x8f\xd2?\x92\x17[\xad\x03<\xc3\xbf\xc1\xa1\xc0^\xfd\xb2\xe8?\xdb\xca\xa1kh`\xd8\xbfc\xe9\x06\xcc}\x7f\xf6?\xa8\x84\x11\x17\x99\xe5\xc1\xbf\xb6\x8c_j"I\xdf?\x13c\x1dW\x95F\xaf\xbf\x11\xa8rK\xe10\x04@\xca\x03\xf6\xafa\x0e\xc0\xbf\xcaV\xde\x8a\x95Z\xf3?\xf5r\xfd\x86\x0b,\xe1\xbf\xaa\x86\xa9\x00\xdc\xe4\x00@pDD\x8eY)\xd5\xbf\xf2D\x1e\x0b\xb7\xd6\x07@\xcdP\xc9\x08.\t\xa1\xbf\xdd\x08\xee\x83\x81\xd6\xf6?\xdaw<\xfd\x8aP\xc8\xbf\xc4\x9f\x84x\xb3A\xf6?a\x9c\xe7\xefV\xb4\xd3\xbf\x86\xfb\xd4\\\x1b\xed\x00@\xe4@\x83\xd2s\xcc\xc3\xbf\x14\xd6\x12\x89\xfc\\\xf5?T-\x92R\x1b$\xb0\xbf\x99@\xb9\x16\x9dt\xf1?\x1et\x03\x15\x96\x8a\xcd\xbfwv\xcc\x14\xbcU\xf7?\xc45\x9d9\xde\xd5\x9a\xbf\xbe\xe6\x93y#\x81\xd8?\xff\x90\x90^\xfc\xd3\xf5?\x1f\xb0\xf8\x08)J\x17@aZ\x13(\xbe\x8e\xd3\xbfo\xb1\x90\xf1\xd1D\xfd?\xcb/z\xdfUO\xc0\xbf\xf3\xba\xde9\xfb\xbc\xe2?d\x8ab\x8a\xedq\x9b\xbf/\x1ff,2z\xd0?\x16\xda\xe96\xffM\xc2\xbf\xa3)=LL(\xe7?\xd5\xf86\xae\xebA\xa1\xbf\xd8\xda\x16S!\xdc\xed?\xcfp\xe3;n\xb1\xc6\xbf\xff`,0\xff\x00\xe7?\x1f\x96U\x8b\x15\xa6\xad\xbf\x99\x9f\x81\xe5\x1b.\xe5?\tU\xb0+\xebj\xd6\xbf![\x0eI\xd3\xcd\xf6?\xa0m\xb7\x1e\xa4\xa6\xb9\xbf\xdc\xa1"\xc0\xbe\xc9\xf2?4.SsF\xfa\xd0\xbf8\xb6"\xd7\xda\x8b\xf2?\x86\xc7U\x8a\x1f\xe3\xb3\xbf\x96\xec\x8d\xa8\xc2\xd1\xef?\x82^/\x94\xb8!D\xbf\x07\x99<\xbf\x1b\xe7\xf0?\x9c\xcc<\x9b\xe1\x90\xb8\xbf\x18\xc7D\x12h\xb5\xf5?\r\xf8}\x04N\xce\xd8?\x1f"\xaa{\x15\xc4\x12@T\x1b\xea\x80\x90r\xb8\xbf\xa97^\x1f\xe0\xab\xf1?"\x0f7\x8c\x8c\x8eh\xbfOV\xd6\xa1Zk\xf5?\xc4qWb\xfb\x1dS?\xe2N%Aj\xa9\xfa?P\xd2\x05i\x0e\xcb\xd1\xbf\xec\xf2\xafY\x18\xca\xf7?kn\x8dD\x8b\xd0\xbe\xbfv~b\x1b\x90\xa4\xf8?\x82\xc1\xce8\xb6\x11\xb6\xbf\xd9\xcfJ\xc8R\xfd\xeb?"=\xe7S\x1dd\x8e?\x859hJ\x10d\xca?\xd9\xd4\x04\x82\x937\xa5\xbf\xdeK\x884\xe6\xfa\xea?K\xc1\xac|\xfb\xa4\xc0\xbf\xdf(r\xef\xaa\xdc\xef?\xa4 +\ru\r\xb0\xbf\xc7\xaau\x90\x1d\x81\xf1?V5FS\xe6,\xad\xbf\x8f\xedN\xde\x05\x90\xe1?\xe5\xa3\xc7\xf7\x96\xe0\xe0\xbfL\xfa\xf5B\xba}\x05@\xb3^\xdd=-\'\xc0\xbf\xe6\xf0\xce\xcbh\x82\xe8?\x18v\x0e\xba\x1c\xcb\x80?=\xe0pQ\x98W\xd1?_N\x1aG}\xe2\xbd\xbf%\x1c+\xefV\xda\xfe?\xe7T_,!6\xc0\xbf\x07\x8d\xc0\x9c\xbf\xc4\xf3?\x85u\x90\x1c]\xaf\xcf\xbf\x1c\r\x93\xc3\xd4e\xfa?\xf8\x9d\x03\xceC\xf1\xd7\xbf\xab\x83\xdes\x97\xfb\xfd?\x97\x87\xc1R\xbd\x9e\xa0\xbf{\x15r\x89\xe7\xe1\xf4?\xa1\xe5\xc8\xe6+[\xcc\xbf\x9b\xe4\x11\xcd\xdb\xc4\xf2?\x16\xa2\xc7\x10\x8e@\xab\xbfe\xbc\x96\x15uL\xf0?\x8f\x1f3\xa7\xb2\xa3\xb5\xbfw\xf0\x11\xcbEO\xfd?y \xd65e\xbb\xb9\xbf~\n\xec\xdf:\xc0\xf6?8\x99&\xf9\xb0\xa5\xb0\xbf\xdb\xa3\xe7\x187\xda\xf0?w\xbc\xe1\xf9\xbcD\xb2\xbf\xb3\x12\xebn\xafr\xfb?\xbft-\xab\x00f\x9d\xbf\x19\xc5\x85s\x8f\x83\xf4?\x87\x9f&5\xb05\x88\xbfA\xc6\x9cNxi\xdc?O\x1b\xad\x17?\xf5r\xbfX\xb0\xba\x0e@\xef\xe8?jv\x89|\xd1N\xd6\xbf+\n\xd3\xa3\xcd\xe2\x02@YS\x14[(<\xc9\xbf\xbe\x8e\x9a\n}\xa4\xfa?\xcc\x14v\xe1\xfe\xa2\\?\x9c\x03\xd9\x7f3>\xc1?\x81\x99\x0c\x18H\xee\xd7\xbf\x8e\x999\xcd\x8el\x00@TkB\xc3?\xac\xb0\xbf\x01\x95\x04\xc8|\xd8\xdb?&\xd8\xb7\xbe3N\xc5\xbfs\x0e\xdc\x93.S\xea?F\x83\xcd\xa9\xc8\x82\xcd\xbfY\t\x08R5d\xf8?\xccy\xbet\xd8\xb0\xc5\xbf\n\xe9\xa7\x90\xc7?\xeb?\x1e\xe8jK|\xdb\xcd\xbf8&\xcf\x96\x08\xfa\xf5?bqz\xf2\xea\xd3\xb4\xbf\xdcO\x97\x8ee\x8a\xf9?\xaf\xf7\x9e\xd7\xa1m\xcb?\xf1\xeb\x1d\xbf\xd9e\x12@\xd9e>(\xfc}\xe0\xbf\xbc\xf4\x0b\xb9\x9b\xea\x00@e\x118 c\xed\x94\xbfv\x1b\xacO\xf6\xd0\xfe?\r\xbb\x04\x04\xed\x8c\xc6\xbf\xa1\xd05x$\xb7\xff?\xbbJFB\x05t\xd4?\xefO\xd7\x14\x87H\x02@\xc5\xf2\xc3.\xb8X\xd9\xbf\xf1\x88E\xf18\x12\x0e@\x9f\x14h\x1e\x13=\xc3\xbf6\xb9\x1d\x9d\xab\x11\xfb?o\x94/\x94[~\xb4\xbf\xcf\xc5|\xea\x88\xee\xf8?\xb3)\\\xb4VI\x96\xbf\xc7\x96\x05}\x0f4\xec?Bv\xaf0\'8\xa7\xbf\xafT\xd8D\xc2\x84\xf0?\x8c\xf8\xe2H\xf2#\xc8\xbf*\xd8\xeb\xdfb\xd8\xf1?\xe8\x02\xfc\xc5\xd6\xf8\xd1\xbf&\xda\xb7\x05\x90\xaa\xfa?u\x07\xdf\xdf\xe3V\xc2\xbfGw\xb9\xb4k\x9a\xe9?\xb3.\x1c\x10\xaa#\xb9\xbf4\xa7#\xc4_\xa8\xeb?Qd\xc3%\xcd\xf1\xb2\xbf{\xd5!Z \x00\x00@\xad@Hc\xe3:\xce\xbfz\xb5\xcb3\xbf\x13\xf4?\x9f\x00\\\x129O\xb4\xbf\xfez\x7f1f3\xf1?]\x9b\xf4\xa9wZ\xbf\xbf\x06}\x0e\xbdK\xeb\xec?\xbf\x94\xb8j\xe3|\xe2\xbf\xa1\xef~\x99\xafW\n@\xb9\xe7\xf1u\xa0\xc4\xcd\xbf\x87\x97\xa9\xac\x1dy\xf6?\x90\xcc"\xb0W\xb0\x86?u\'*\x0e\xb0\xde\xf1?\x99\xc0\xd3.b_\xc5\xbf\x07U\xb13jF\xf3?\xaf\x99\xec\x95\x0ba\xc5\xbfW\xc6\xcb_\x9d|\xfa?,\xac\x86\r\xac\xa6\xbd\xbf4\x1e_\xa2\x11X\xea?\x9c\xe07AW\x8c<@\x90\xf9}\x1a\x9fR!\xc0|\x08\x06\x8e\x02\x8d\xf6?\x15\x9c%~\xbe,\x05@\x1c\xdf\xb2\xec\x15\xa7\xd1\xbfS\x83\x81\xe4\xed\x14\x00@d\xf7\x8ayf\x0c\x9e\xbfGK,\x17\xb0n\xe5?\xb0\x7f\x133?\\\xb2\xbf\xa4k\xcdMh\x80\xe7?\x9bT\x86\xf7\x80\xa1\xa4\xbf\x94\xdd}E/\xdd\xf5?\xca\xd1\x939\xd1\x07\xd7\xbf\xba\x1aL\x11\x8a8\xfd?$\xc0\xf4\x82A3\xe0\xbf5d\xad\x9b\x88\xb4\x06@k\xc9]\x13\x82\xc1\xc7\xbf\xed2\x05\xad;\x87\xf3?\xdbd\\sI7\xb3?\x85>b\x01\x0b\xe4\xf5?|\x91[\xb7p+\xc3\xbf\xe7\xffd\x1a\xd4f\xf1?\xe9}\xeb\x10\xce\xb2\xd8\xbf\x86\xbc\xbb9\xf9\xdd\x15@\x85\x82\x06P\xb9*\xbc?\xb7\x06\xac\xad\xd4\xce\xfe?\xd0\xc4=\xc8J\x1e\xad?\x90\x90\x99@\xe5T\xe2?\x90\x10\xde\x8a\x90\xb7\xd8\xbf\xa2\xf1\xbb\xa4\x92\xc2\xfa?\x01\xa6\x98\xec\x90#\xbe\xbf30<\xb5\xd1h\xe8?\xfc)`\xa4bF\xc6\xbf-K(>\x98#\xfd?w\xe10\r\x11m\xa8?\x90nL\xdfz\xbd\xf0?\xddccH\xab\x12\xa3\xbfl\x107m\xf8\xd8\xe8?\x1c\x03\xf8\x0f=4\xb7\xbf\xd1<\x89\xac\xcc\x92\xe0?Y\xa0\x9d\xf7S0\xd0?\xf2\xf2+\xc8\xaa\xba\x11@\xe5\xb73\xbfT\'\xb1?\x9e\x00G\x10\xab\xe1\xf0?\xbaM\xbb\xfe\xa3\xa8\xc3\xbfM\xe2\xc6\x89b-\xf5?\xd3\xe9\x8bx\xb3c\xc2\xbfMBaH\x9c\x9b\xf7?\xeb\n\xdd\xd5j*\xc8\xbf\x02X\x8e\xf4|\xd2\xf7?*D\xea\x8d\x95Z\xaf\xbfn\xd7\xb8\x8b\xab\x1b\x03@\xc9U&\xf0^\x03\xa3\xbf\xa5T\xdf\x8d\x00\xce\xe0?\xa17\xa8\xc6%\x02\xce\xbfUT\xb5\x15E\x15\xf9?t\x86\xac\x14*\xfb\x88\xbf2\xad\x18\x14\x881\xf1?7\xeb\x10\xae\xf1\xf8\xc5\xbf?D\xd5\x0e\xee\xbb\xe3?B\x95\xcea4\x9a\xc0\xbf\xa6\x9f\xb1\x1e^3\xee?f;\xab.\xc8\xd7\xd3\xbfU\xf2&Y\xac\xd5\xf1?k\xd4\x823d}\xc5\xbfa\xb5\xa5\x99\xf6\x8f\xf5?{_AS3\xd9<\xbf2b\xa5\xf4,\xed\xf1?\xe5\xd7*5\x0c\xc2\xc1\xbf\xb0F\xcb\x9f\xcd\xf2\xf9?\xb6>~)r\x9f\xb9\xbf\xef\xaf\xa7B\xf5\x93\xe2?&>\xc7\xc7%n\xa7\xbf\xc7\x80fW\xc6F\xf6?\x84\r\xdb\xaa/g\xa2\xbf\x8f\xc8\x82I\xdc\x00\xe8?\x19\xe2K\xe3t\xa3\xc3\xbf\xf77L\xa2\xeb\x0e\xf0?\x86\xean\xac<.\x9d\xbf\x92?4\x8b\x9e\x1d\xe4?\xef\xb4\xe7\x11\xc9H\xaf\xbf(\xd0\n5\t\x9e\xf7?\x04m\xc3l\x90\x12\xcc\xbf\r\xe5\x82$\x90K\xea?\xc9i\xaa\xc0\x9c\x9c\xbf?\xc7\xcf9Q\x98k\xd9?u\xe0R\x82{*\x96?\xac\x05\xb3\xef\xfc\x99\xf2?q\x87\x02k\x14k\xea?0?\xc5\x875\xd4\xfc?(\x92\x81f\xbb\x85\x8c?\xaaU\xa1^s\x94\xee?5R(\xb5\xc2\xfa\xcc\xbf\x91\x9d\x87U\xcf\xd4\xf7?\x18\xb6t\x8e=\xc2\xa8\xbf-P\x15\xa2\x13\xc2\xef?\x0b\xcc\xcb\x88Oo\xca\xbf\xd3\x80\x10\x96V\x82\xfa?\xf9\x9cr/\x86_\xcc\xbf\x01\xe92\xe8\xba\xcd\xf7?u\x1d\x19\x1a\xa6!\xe2\xbf\xb6L\xdeA?\xde\x14@\x1e\xd5\xd9\x05\x80d\xd1\xbf\xc8\x0c\xc8VRL\xf2?\x83\x9e\x89\x18\xaa\xda\xa0\xbf\xb6\xc6\xd2\x07\xe9\xe2\xc0?Xzi#\xca\x1f\xac\xbf\x16V\x1e\x84\x9dh\xe8?U\xb9\x89\x8d2.\xd1\xbf9\xeb"\xe7\x99\xab\xf9?\x8f\xa5\xce\x14\xbe<\xbc\xbf\xd0\xa5S\xe5\xe2\xca\xe8?Z\x01|F\x8b2\x9d\xbf\x1b-\xcf\xa8\xe4\xe5\xf2?\x17\x9e;\xec\xb9\x7f\x90?=\xb2\r\x11\xf0\xd1\xf2?\x88@y\xdbm\xaa\xa1\xbf\xbbl\n\xaa\xc1W\x00@\xa9P\xde5\xec\x1f\xb7?\xe7\x8cw /D\xfa?\xf4\xea\x9de\x98J\xd0\xbf\xabM\xaeA\x0e\\\xf7?\x8e\t\xfb,\xff\x93\xc0\xbfQ\x96\xd6\x9b\xad\x92\xf5?\x8d\xfb\xd6\xe2\xab8\xb9?U\x08\x9e\x00Ox\xca?\xb6\xaf|&y\x93\xa3\xbf\xf6q\xe4^-\xd7\xf1?\xdf\xa9\x8d\x12\xa0\xe0\xce\xbf\x9c8\xaa+BM\xfa?\xa5\xf6Js \xe1\xd1\xbf\x01\x90Y\x8e\x92l\xfc?\x16\x14\xca\xd1\xd6R\xd6\xbf$h`1\x94\x08\xff?F\x0e\xf2\xea\xce2\xd4\xbf\xf2\rueC\n\xfb?\x9eX\xcd2\xab\xa7\xc9\xbf\xe9x\xa1\x8cc\xec\xf7?\x1a\x88:~vZ\xd5\xbf\xb8V+\xd6\xa2\x99\xff?SVXz9\xdc\xca\xbfE\xa9\x0e\xfd\xae\xbb\xfa?\xa55\x15\xc9o\xcc\xd0\xbf\x8a\xb2\x03\xd31\xef\xf1?x\xef@\xfb\xb05\xd1\xbf\x9c\xf4\xb9`^\xc2\xf5?.\x1f\xde\x04\xa5\xde\xd4\xbf~\x16K\xdc\xcf@\xf2?\x91 M4\xff\xf8\xb5\xbf\x86\r(Tr\x01\xf4?\xfb@[\xdd\xd8\x16\xc5\xbf\xba1\xb9_\xc71\xf3?v\xe1Q\x1f\x18\'\x91\xbf\xf8\x8b\xe9\xa7\x16\xa7\xc8?\x98\xf1\xaa\x00\xab\x04\xb7\xbf\x0e>4dz\xc4\xe9?!|\xd6\xc59\xed\xc1\xbfOIeTu%\xe2?\xc7kOF\xc6=\xa4\xbf;D\x1f\xdf\xb1\xa3\xf8?V\n\xe7\t\xfex\xbd\xbfZl\x1fR_\xa4\xf0?\x05\x9e\xcd\xf2\xba-\xb6\xbf\xcd1\xf4\xaf\x9d%\xf8?[\xebxK\xa0\xfco\xbf(\x1e\xc8q\xa6r\xdc?K9\xd5\'\xbem\xcb\xbf\r<\x12\x1b\xc5\x87\xe8?\xf8~\xc6\xe20\xd3\xc5\xbfp\xd0\xc4\x87\x0c\x82\xf5?\xdee\xc7\xa6X\xa1\xd9\xbfO\x83\xd7o\xe5P\xf8?\x8b\x8dO<9T\xb8\xbf\xb7\xae\x1b\xa5gS\xfb?\x1fu\x9f\xe9\x83\xc0\xbd?\x8fh\xb5H\xa1\x0f\xf6?:\xd9\x04\xbb\xec\xb4\xd9\xbfs\xd6\x11\xd53\xab\x04@\xc4|\xad\xcc\xd1\x13\xe3?W\xd9\xbf\xe7C\xb0\xff?\x8c0\x98;UY\xcc\xbf\xb0\x8e\xd2\xd8\xdc\xb5\x00@\x9a\x13g6\x13\xe5\xa7\xbfT\x17\x8dlpB\xec?epW\xcd@\xea\xb6\xbfR\xbc\x86\xc3i\x99\x00@+2z\xca`\xb5\xd9\xbf\xcd\xcb\xc4\xfe\x99y\xfd?\xa9W\x8a\x98\x03/\xbe\xbf#h8\xcd\xae\x83\xf8?L\x82\x89@\x87\xac\xc3\xbf\xb8\x1e\x0e|V-\xf5?\xbf0Iq\xee9\xdc\xbf\x9e\'t\xce\x12#\x01@\xcb\\\x88:\xe9\xbb\x95?w\t\x1e\xc6d\xec\xe6?\xafC\x17\x9e\x03W\xce\xbf\xa8\xbf#\x05~\x10\xfc?4 \xfb\x94\x7f\xf3\xa6\xbf\x02_.S\xd7\xe0\xf2?xF\xcdA\x8b\xa3\xcb\xbfM_Uc\x8cE\xf0?F\x1b\x15T\xfem\x8e?\x82>A=\xcf\xe4\xe2?@\x8bV\x9c\xdf|\xb8\xbf=\xc0A\xcd!\xe7\xfa?\xd9=\x94\x95\xf4\xf7v\xbf\x1d\xd5fGj,\xf7?'
p136
tp137
bag2
(g3
(I0
tp138
g5
tp139
Rp140
(I1
(I2
I438
tp141
g12
I01
S'\x81:\xbeV\x83\xa3\xc0?\xbc\xd6\xae\x91\x98\xe7\xe9?e\x94r\xc5\xf8\x90\x7f\xbf]XKB>\x01\xd7?.\x1dY;4\xc4\xa7\xbf\x8d)\x87\xb6\x04\xd4\xf1?)\x97\xe4\x95E\x1b\xc1?d4\xb0u\xe6\xec\xe4?H~YC\xff\x17v\xbf9\x92\xe5\x8c\xe1\x97\xee?\x96\xb5\x86\xb7z\xe1\xd7\xbf\xadB\x06\xf9\x0c\xd0\x04@\xcb\xa95\xeb\x82\xb4\xc0\xbfrh\xec5\xc7\xc0\xf1?\xb4\xe5N\xef\x1c\xbd\x82\xbfK\x008\x98l\x0e\xf7?V\x19\xdf\xd3I\x95\xac?\xa7\x83\xbf\xde\xf3\xf8\xd3?\xdf\x11\xbf|\xc3X\xb8?\xd2u\x9f\xd5\xb0\x88\xf8?\x1eHu\xc3\x1c\x11\xe2\xbf\x01\xd2\x8cXN\xf3\n@\xe3`\xb3+\x19\xa3\xc4\xbf;\xc7.\xb4J\xf2\xf2?u\x98\xcc\x1e\x7f\xe6\x97\xbf\xb2\xe0I\x16\xe7\xfa\xf1?\xa1\xaf0s\xa6/\xc3\xbf?"\xc0\xdc\xdd\xdc\xf4?_\xc9\x06\xd1\x92\x08\xd1\xbfd\x95\xebI\xfc\x08\x01@\x8d\xfb\xcc\xb4\xdey\xbb?\xa1\x13\x01\x9b\xd0\xcc\x02@\xdd\xde\xb4+tR\xb7\xbf\xe1\tk\x18\x7f\xd7\x08@\x08&Bv\xd7C\xaf\xbf\xef\x19-\xcf\xa9]\xd9?\x00\xc4\xd9=\x96p\xbd?\x99\xbf[\x1e:u\xf7?\xf0O\x0e\xf1j\x8a\xb3\xbf\xdfO\xe8\x9f\x11z\xf4?{\x1f\'\xc8\x9c\xdf\xa7\xbf\x0f\xac\xc0}a \xf7?\xdf\xe5\xd0\xe7\xfa\x0f\xbd\xbf\x88ma\x8c\xb7\x04\x01@s"\xa1)Q:\xbf\xbf\x86;SCE\xa6\xe6?|A\xc9\xda\xde\x8d\x88?W\x99\\\x84\xe8\xa6\xf8?X\xc0\xf4\x89\x9d`u?s,\xf4\xcdO\x96\xed?\xdcv\xd30c\xb9\xa1\xbf\x97p\xed\xdbMa\xe1?\xf3\xc45*0\x0f\xcc?\x8a\xb9\x93L\x15\x0c\xe0?\xee\xe0\x06\xf1!r\xc2\xbfSK\x07\x05b\\\xee?lU%\r\x88\xc2\xd0\xbf\x94\xf6L`t\x82\xf5?\xff\xa1\x05M\x8c\xbdZ?\xdff7K{4\xe9?\xc6F)\xc1\x8b$\x98\xbfF\x0fE\x9bR\xd1\xf8?ey\xd3\xab\xe8\xa2\xb0\xbf\xf4\x93\x13\xbf\xff\xac\xf4?\xd2o\x03\x01@q\xd6\xbf8\xf7\xc4\x90\xf8\xad\xfc?@\xb5\x08G\x9e\x1f\xa4?E\xe1\xbc\xfe\x84\x93\xde?\x02\xe0\xe2,\x13\x15v?\x99\x03\xa3\xdd\x98\x15\xf1?`=l5g\x00\xb8\xbf\x0fh\x14\xfa\xe9\x89\xe5?\xda\xbe\x1c8\xbe\x1a\xd1?\x7f\xa3\x91t\xf7\xc7\xf5?W\xc06\xa1\xc5\xb8\xc5?y\xea\x8c\xa3](\xdb?:\xc48W\xf5\xda\xb6\xbf-;D\xe8cn\xe5?K\x91\x85<%\x92\x9a\xbfv:4\xc0-\xf6\xe4?Q\xcd\xbd\x04\xd6d\xbe\xbfl\xf0\xd0\xcd\x19:\xf0?`\xaa\xaa\x93\x9aT\x84\xbf\xbd\nZ8\n\x14\xf2?xD\xaf_\xd9\x83\xb1\xbf\xbc\xccX\xad\x8eU\xfc?\x13_\xb4p\xff\xa7\xb1\xbf=\xa3,p\x16\x11\xe9?Q\x97\x97\x7fr\xd5\xdd?\x14t\xac\xa7\xe4\x89\xed?n\xebd\x83dS\xc9\xbfV\xde\xa6\x82\x92\xe2\xf6?\xf3\xb8V\xb8\xd2\xf0\xb6?g\x8c\'\x8ec\x93\x10@\'\x07\xb1\xec\x94%\xc3\xbf\x1eY\xe3qc\x85\xef?\xa7\xbb8\xcc\xb3\xf5\xc8?OR0\x143?\xdb?\x7f\x08\xe7\xe0h`\xcb\xbfB\xc4\xc6M\xf6\x12\xf6?\xe1 \x11\xc5ag\xcd\xbf\\8\xba|\xff\x92\xf9?g_\xd1J\xb1\x83\x94?\xfe5\xd2&\xbe\xbb\xee?a=\x159\xf2\xec\xc0\xbf\xd0\xde\xb8L\xd5\x10\xf7?\tW\xb0\x82C\n\xac?\xec)\x8d]\xe8F\xf8?\x1au\xc5\xeb6\x11\xc9\xbf\xeb\x1f\x15S\x05\x8e\xf8?\x1f\xbd\x107\xe1I\xbf\xbfc\xfe\xf0dyY\xf4?\xe0d,\xb4k\x06\xc5\xbf\xeb\x92\x81!W\xb3\xef?\xc6\x8c \x9d\x99v\xb4\xbfS\xf1K\xb3Q \xff?\xae\xe1\xda\xac\x93\xe7\xcb\xbfiiN\x87N\x91\x00@\xf4\x00n\xc5=Y\xa1\xbf\x0e\x1d\xfb\x1bo\x90\xf3?o\x1a\xab\xc6\t%\xb9\xbf&7\xdb\x06\xe8\x0f\xef?\xf4,/\xe68M\xb9\xbf\xde\x9f\x88Av\xe6\xef?\xf1\x17\x0c)\xa3\t\xab\xbf\xd5\xdc\xa3xi\xb0\xf9?\xe0q?7\xceb\xd4\xbf\x9cq~\x8b\xe6}\xfa?R\x94\x8a\x99x\x13\xc1\xbf\xce\n\xab\x10e\x84\xec?U\xa9)\x90\xf0\xd1\xd6\xbfI\x8dUc\x1f\\\xfb?\xa2#\x0fQ\x89\xe5\xa0\xbf\xe2C@Y/\xd7\xf9?\x11AS\xa2\x830\x89?\xb1\x08\xd5\xac\xd3\xf5\xee?$\t\x0efy\x17\xda\xbf\xdaq"\xa5\x90<\xff?\xa5\x96\x9b\x15Vj\xba\xbf\xc1\x18\x03?T\x04\xfc?u\x12\xad)\xe0\x16\x8d\xbfH\xcf\xa1\x88`\x0f\xf1?\xb8\xb9\xcb\xa8\r\xe8\xbc\xbf\xf9\xeaP3\xd2\n\xe3?\x85RA\xa0\x1a,\x9b?\xe4\xeb\x97\xaa\x04\x99\xf6?\x93\x8e\xea\x0e\xc0\\\xb7\xbf\xc7/EKw\xf8\xf7?^\xa6\xcd\x82\xe8\x8e\xb3\xbfy\xad\xc9\xfb\xf5<\xeb?1\x0c\x97\xa7\xb8\x1c\xbc?i\x8b\xf37Mi\xb9?\xc1\xeaw\xe5\x9b\xa4\xbb?\xbc~0/b\xd8\x0e@WgMH\x12k\xd0\xbf\xdd?\x7f\xc1I5\xf5?B&\x8f=\xc2\xef\xa1\xbf\xd6T,S`O\xbb?\xed\xeb\x19\xf0\x86\xf5\xb3\xbf\\\xf5\x12d>&\xe5?}X\xf31,\xd8\x87\xbf\x98\xf1\x14A\x11\xc0\xde?\xcc\x9b\x11\x81\xa6\x8e\xe9\xbf\xbbv\x94\xach\xbf\x19@t .:\xe7D\xc9\xbf\xef\xbd{\x95\xf5\xb7\xf8?\xec1[\xe5O\x05\xc5\xbf\x15\xd0/\xad\xd8F\xef?\xc2\x19a\xe0\xed\xf7\xa8?\x17t\xccu\x90\x1a\xe5?\xde\x9cP\xf1>"\xce\xbf\xc7\xbeLQ\xe6\xe9\xfa?\xae\x98\xea\xb9\x95\xcd\xb8\xbf\x98\xcc)\xea\x10\x8a\xe7?\xee\xa7\x91)%\x0e\xa8\xbfk\xfb5\xec\x823\xfa?\x18(\x8e\x8d\xf3\xbd\xfd?\x97\xe7\xe9\xd7\x15\xea\xed?\xae\xa4\xa4M\x9d1\xd4\xbf\x83\xef\xc8\xf7\xb6S\x00@\xac$\x07\xdfa\xb9\xd9\xbfs\r\xca\x92\xfa\x0c\x0f@o\x06Y\x06D\x08\xb8\xbf`\x16\x91\x98\x0c\xd0\xe2?$\xa4\xdd\xbc\xacN\xc4\xbf\xca.\xbe\xca\xf4*\xf0?\x9fO\xfeI\xa8\xea\xd3\xbf\xca\xe1P4u\t\xfd?\xa3%\xae\x02\x87\x1d\xa7\xbf\xf3\x16^\xb5\xcd\xa1\xf4?\xf0\xb9cF`T\xba\xbf\xced\xa8\xf9+\x8d\xf2?\x1b\xf3P?\x01\xeb\xa4\xbf9I\xfd\x95\x8e\xa7\xe7?\xdf\x1f\xed\x95\xa7W\xbb\xbfrR\xe2\x11\xb9\x98\xdd?r\xbd\x94\xcb[\x1a\xbe\xbf\x12\xc2\x10\xea\xd6\x98\xf3?\xee#\xb7\x01"{\xcf\xbfD46u\'\xea\xf8?\x93\xdd\xd1\\\r\x08\x9f\xbfb2\xdb\x84\x8d\xe5\xfa?\\i4\xfe54w?\x1d\x9e(\xacX@\xbb?\x91X\xd2\xe1\x84\x01\x8a\xbf\xbd+\x93\xa6\x18\xb9\xe6?\x9b\xeb7\xb8\xdd\xe7\xd1\xbf\x16\x90k\xa8\xfdj\x0f@\x02l}\xc2\xa3\xad\x03@\xe0\x06\xa2 \x9d\xf4\r@[\xb9\xf2\x11\xcbn\xc2\xbf\xcc\xd4\x8b\xe8V\x94\xf0?F\x91\xb7\x14\xe7\xc0{\xbf\t\xce\xef\x8e&\xa2\x02@\x7f4\xa8\xed\x08P\xb4\xbf\x86\xbf\xf3\x95\x95\x03\xe3?\xa3O\xb6\xd9\x18Kp?[\x84\xab6\xdd\xbb\xf4?(\xb0\xc1\xcf\xfac\xb6\xbf\x19S\xfc\xc6\xf4(\xe0? \x88c\x8a*\x04z\xbf\xe5Z\xa1\xa6f\xf2\xf3?\xe7\x0b}/\xea\xf4\xb1?\x9dn\xd3"\x80\xcb\xe4?\x9b\x9d\x91\xfe\x94\xdc\xe2\xbf\x98<\xe9\xec\xa7\xb2\x18@\x86\x8a &I\x83\xc3\xbf\xf3H\x8c\x0e\xeb\x0f\xf4?Z\x8a\x8f\x08\xeeZ\xc8\xbf\xcd\x14\x14Z<\xda\xf2?\xfb#\x9f9\xd5\xd6\xbb\xbf-\x01V\xf7v\xde\xdb?\xea\xed\xb8\xe7$\x94\xb5\xbf~\x1d\xa3:\xb0\xa1\xf3?_\xdbJs\xda7\xac?\xdb\xc6R\x7f\xddn\x0b@\x15\xf6\x82\xca1\xc2\xbb\xbfo\xdd\xae\xd0?\x1a\xf2?*n0xx\xd3\x94?\xb2\x17\x99p\xc6\xb2\xde?S(\x96x\xdf\xd4\xc4\xbf\xc5\xa55\x19\xb7\xec\xf5?[\x9a|\x96>\x8c\x92\xbfL\xae\xed\xd3\xf2;\xea?\xfa\xaa`xc(\xc4\xbf\xc7\xcb\xd1E\xe5\x99\xf3?\x81\xad\xb1\xff\xc8G\xbd\xbf\x8c\xe2\x15:\x8aa\xe4?9\xaf&\xa2Q6\xb6\xbf\x89\xcf\x03\x1f\x17\x7f\xe0?\xb5\xb9DV\x1f%\xb2\xbfB\x1b\xa1\x19\xb74\xf1?\xb9rH\x89-R\x9c\xbf\xe1\xda\x1e\xf9\x16Z\xd9?N\\\xf8\x90\xc09\xe1\xbf\x84\xa0\x88\xb6\xb7\xa1\t@hP\xa6\xd7\xe1\xae\xc1\xbfD]\x0c/\xbei\xf4?V\x02J_}z\xb1\xbf\xbep\xc9b\xfc\x95\xd1?\xb8\x06T\x12>r\x88?\xafO\xd9\x9ac\xbf\xea?$\x17C\x87J\xa3\xe3?\xd93\xda\xab?\xa2\x04@x\x1c!6I\x18\xbb?t!\xfe\xc8\x00q\xf6?\xc8(5\x13\x9e\x9b\xe4?A\xf8\xb0\xb4\x0b\r\xf8?\xc6\x8c\x1f\x17\x12\x86\xd7?U\xfa3\xe9\xbc\xc8\xf4?E\xca\x86\xc9\xfd\xf6r\xbf]\x013mo\xab\xf6?i4RS\x1cTe?s\x93\x1bk\xc0\x15\xd8?\xec\xa5\xb6XD\xa1\x84\xbf\x8f3\xc6\xd4\x85?\xf7?w\x94\x9d6_\xf1\x90\xbf\xebc\x1a\x15>\x81\xf1?t\xfaR\x1c\xa1\xfe\xb4\xbf\xd4\xd3\x11\xf1\xcb\xdb\xe3?\xb1Ni\xd5[\xb6\xd4\xbf\x066\xc3\x17\x84-\x00@\xa8\xa6\x91ZGc\xc6\xbfp\xb8\xdc\x94\x17b\xf4?<M\xbf7\xeeQ\xc2\xbf0\x14#\xbe\x95\x7f\xfc?\xaa\x1d\xdf\x18\x82\x94\xc0?PR\xf3\x82\x9d\xd3\x07@\x96\x98U\xcc\xe2\x0e\xb0\xbfH\x16\x9a\rjo\xf0?\xd0\xff\xae\xf9\x16\t\xba\xbf\x8ak \xbe\xf9\x01\xf6?\xefP\x9fSm\xd3\x9c\xbf\xdc\xb7_\xcd\xbe\x17\x02@\x11S*\xf9\xd8\x9b\xc8\xbfL[\xbd\xf5\xe2\xe9\xfe?\x04\xde\xb2\xe9\x16C\xa0\xbf\\\xd8\x9fU\xb3T\xfb?\xce-\xcd\x8a\x8a\x0b\xc2?\xc1\xbc\x0f\x9a\x8b\x86\xfd?\xd9\x83<\x0f\x00Q\xe2?\x86\x18\x06Z\xea)\x02@\xce6D\xb9\xef\xaf\xb3?q\x1b\xd0h\x89\x98\x92?\x81L9&\xa3\xc0\xb1?f`S\x7f\'\xf0\xe0?@\xc5}\xb2\x16\xcd\xca\xbf>\xb0;2L\xa3\xed?\x15\x1e>f\xc2*\xb6\xbf\xe0\x0ex\x89\xdf0\xf4?\x10A\x91\xef\x80\xdf\xa4?\xc6\x17\x00\x1e\xca"\xe3?\x8a\x94\x11)\xf8h\xc3\xbf"^W!\n\xc8\xef?\x10\x18\x1cdx\x0f\xcb\xbf\x87\x99\x06n\xc4d\xf4?\x1c_\xdd\xc5\x17\xcd\xb7?<\xce\xaf\xac[m\x03@3\x90y\xd4\xb7A\xd4\xbf\x13#\xf6\x0f\xd7$\x07@\xe7\x03_\xfei\xbf\xc9\xbf\xea0V6K\x82\xf3?\xa2]c5d\xab\xad\xbf\x13\xcf\x00\xac\xbc\x83\xd7?f\xe5\xe0TA]\xb6?\x0ebn_\xe7C\xf0?\x92?\xb3\xdc\xa0\x13\xbc\xbf\x85\xb7\xee\xd3\x9bj\xf2?\x17C,K\xd8\xca\xa0\xbf(4awW\xff\xf9?.\x07\x8a\xca6\xea\xc0\xbf\xc6\x94\xf2\x1a<}\xff?\x9en\xcd\xe0\xc5\x12\x9f?S\xd4\xdd\xe7\xbf^\xf1?\x1dgS={\xff\xa8\xbf{]o\'\xecE\xee?{/q\x03\x97\x05\xc1?dAH\xc0\xb8\xa9\xf5?\x1d\x9a[\xa3,\x19\xc5\xbf+\x0c\xed\x8ev\xb3\xfb?\xdd\xa8b\x1cU"\xc0\xbf\xd9 *\xc3\xb4\xb5\xe7?\x11A\x0e\xcd\xa7\xe6\xbc\xbf\x8a\x1b\xcb\x07\x84,\xf0?\xa7+C\x80\xabh\xc6\xbf\x9c\xa5A\xc8\x8a\xda\xe9?\xc9\x9f\xa1\x14\xf0$\xa1\xbf\x89\xec;\xa0\x08\xc1\xf0?nUJ$3\xfc\xdb\xbf\x82\xc8{\x8e\xeat\xfd?\xab\xf7\xaa\x16\x91x\x8f\xbf\x99\xd7c!y\xf0\xe6?\xc7\x00@\xcf\xa5\x0c\x03\xc0\xfd\x073c\x92\\"@I\x1a\x99\xaf\xcf\x03\xb6\xbf&{\xd3\x0c\xa8>\xf7?e\xf4\xe2\xd4{\x16\x8d?C\xdf\x95\x9a\xd1^\xf7?5\xc8\x18f\x1b)\xd0\xbf\xab\xd8+,\xf0\x18\xf8?\x0f\xb4\xc9d\xe3N\xc6\xbf!\x18\xa5\xc6{#\xf1?\xf0.\x05\xe8=\xb3\xcb\xbfo\xddm\xb4\xde\x16\xf9?\xa5+\x88-8\xfc\xab?\x08/6\xdb=\x96\xf6?\xb7\xa3\x02Qn\xe3\xc2\xbf\xbe+\xd2Yu\xa0\xf9?\xe1\x8d>\x01\x81\x81\xad?PU\xa3\x99\x8c\xd7\xb3?\xd8\xf2=\xce\xdaL\xb5\xbf\x90@\x8fz6^\xe0?/\x1e\xcd\xf7\xe7\xdb\xc0?\xd1\x0e>;\xee\x0e\xfc?\x0eW$\x04\x83\x17\xa8?yh\xa8d<Q\x02@\x82\xd1\xc8\xa9K\x93\xc4\xbf/\xf8\xcet\xcf\x1d\xf3?\xd5\xdb,~\x934\xc6\xbf\xae]\x14o \xd5\xf4?\x8b\n\xcb\xa3\xff`\xc2\xbf\x86\xb1\xff^\x1b\x0b\x11@\xda#\xb7\x19:W\xad?\x0f\xaf\x89\x98\x16\xbe\xf6?Y\x0f\xca\x9d6\xc6\xd2\xbf\x80\xcc@\x8f\x11\xea\xf4?\x0e{\x1e\x81 ax\xbfE\x87\x81Cpj\xf8?\xeb-\x93\x9b\x89\\\xd0\xbf\xaf\x93\xb4\xff6T\xf1?%\xa7\xb1a\xd4M\xd0\xbfC\x1fH\xfb\xaf\xeb\xf1?\x14U~za\xce\xd4\xbfj\xe1\xc9^\x8a7\x00@\x1b\xc6@\xb9\x0e\xb8\x87\xbf\x87\xe8W3\xe7\x14\xf0?N\xd1\x10\x08\xf4{\xc0?<\x8a-\x15\xd7\x87\xfd?n\xb7Z6\xbcO\xb3\xbf\xb9\xd3L*:\x0c\xee?Um[w\x85\x9d\xb9\xbfC\x1e\x18k\xb6\xc0\xf4?\xf2\\\xca\xb4`[\xbc\xbfT;\xfem0\xb9\xec?\xb2\x96\xd3}\xa1\xc3\xba\xbfT\x82U\xf4\xce^\xf0?X\xd4\xe2\x17\x86E\xb0?\xba;3\xb6\xec\x1e\xe9?b\x06\xbe\'\xde\xed\xad\xbfh\x1d\xa9~\xca\xb6\xd6?\xe4\xb58-\x18N\xb8?\x01\x1f\xdahu\xb5\xeb?\xef\x1c\xec\x9aIL\xcc\xbf}\x89\xba6\x9eh\xf1?\xb4\x04\xb9\xadV\x99\xc5\xbf@\x15\xf2=\xa5\xc3\xeb?.OM\n\xa9\xab\xe9?\xb7\xb0\x16\xd12\x06\x05@$\x08\x95j\x1b;l\xbf\xc4J%\'\xfb\xf1\x05@K\x83\xcdx|f\xc0?\x94\x98\xc0\xb1Y%\xf0?G\xe4)\'\xf7V\xc6\xbf\x97\x19\x1f\xab\x17\x96\xfe?\xb8\rfrdh\xe9?\x99\x83Z\xe5xo\xeb?\x85\x9dF\xe2,\xe6\x80\xbf\x94Pb_\xb9\xc9\xf0?\x80A71L\xd6\xe0?\xa2S\x0c#\xc9l\x00@\xf1mo\x91.\xdd\xb9\xbfN\x0c\xa02\x1a\x15\xfb?\x8f\x94\xc0\x13\xb0J\xb9?\x8bq4\xdd\xee5\xeb?g\x05\xeb\xf7\x8bz\x93?I\x94}\x0e\x00g\xe1?\xc6\xa1\xc4\x06|\xcf\xb9\xbf\xcfDx\x98+\xb3\xda?\x9d\x84_#l\x9e\xaa\xbfBlg5w\xaa\x07@\x90\xfa+\xd3\x19[\xac\xbf\xcd\xb0X^n\xa2\xfb?\x83\xcb\xbf[\xdb\x95\x95\xbf|\xc4\xa1\x00\xcf\x8d\xe8?\xbe\x91IS\xbb`\xa9\xbf\xfd\x85\xab\x95\xea\'\xed?\x12\xd1\x8a\xab\xc3\x81\xb3\xbfw\x8a\xd1\x84\xe7w\xfc?\xdf]\xf1ch;\xcb\xbf\xd3\xf8Q"K\x9a\xf1?\xf3\xa0]\xcf\xf0\x19\xd5\xbfj\xa9\xc4\xfb\xb7i\x02@Ud\x03\xe3\x1e]\xa3\xbf`\xf5+1\xf0R\xf8?\xc6=\xcaA\x16\xba\xb9\xbf\x10\xe3\x16(c\x98\xe9?W\xf8c\x99\x83\xcb\xae\xbf\x9f\x08\xc3@u\x10\xf3?\xac/\xcd\xa8\xe03\x9e\xbf\x9ap\xd9\xea\xdc\x03\xe7?\xee\xdb\x19\x15\x92\xb3\xb5\xbf\x1f2G\xf4\x00(\xf5?\xa0\xfb0\xa7\xc3\x15\x9a?\x07\\\xbb]c\x10\xea?G\x90B|\xb4S\x99\xbf\xe6pWX\x86%\xf1?*S@\xc5)\x01\xaf\xbfS\xfc\x07\xc8(\xbc\xeb?\xb7a~5W+\x96\xbf\xb1\x1f[\xd3\x18v\xed?l\x9f\x83\xcbw\x87\xc6?1i\x9a\x9b\xe6\xd1\xfb?\x98\xbd^\xae\xb8\xfa\xde?GyS\xd9}\x9c\xfc?\x17eV8\x91c\x98\xbf\xfc\x072\x97`\xcb\xe0?\xe4_\xa6q\xaf\xf2\xc1?v\xf3\x83\xb7\x8f\xdd\xe5?\xe3L\x88\xc1\xc4\xe6\xc3\xbf<G8\xfcyn\xf9?\xc4\xe5\xe3(L\x04\xd2?\x96\xc19\x83\xc3\x81\x04@\xd0\xec\xda\x83T\xc8\xc2\xbf\x85f\xac\x8f\x97\xb0\x01@\xa2_n\xcf\xec\xc3\xc3\xbf\xb6I<f\x93\xeb\xf4?`)\xbf,7\x0c\xb2\xbf\x83\xc7|\x9f\xf7\xd4\xf4?\xc2\xa8\xda\x1ba\xf9\xba?\xad\xf5r\x0c\t\xb5\xff?\xbf\x8b\x85<r\x16\x9f\xbf\x9f\xafuj\x1b\xb0\xe3?\xff\xaa\xae\xaa\xae\x90\xd2?b\x15\xdb\x0f\x86\xa4\xf4?CLu\x8a&\xdb\xcb\xbf\xe8\x01\xc7/q\x03\xfe?\xa3\xbb7\x1a\xfb\x86b\xbfM\xd36\x0c\x1e\x8d\xee?h\x9a\xf8\xe7op\x95\xbfq\xc54#7j\xe9?J\xa0\x9b\x97T\xd5\xa2?\x10\xc8B\xfc\xdd\x93\xf3?\\\xeb\xa1x\x8a\xd1\xc6\xbfM\xdd\xa0Q<\x15\xf6?\xfc\xfa\xbf\x10\x13\xc3\xc0\xbf\x8e\xb30\x90\xd7\xe0\xf1?\xe8~\xf0\r\xb1\x9d\xcd\xbf\x99\x05@}\x1aJ\xf2?fo\xa6\xfa\xdc~\x88\xbf\xbdr\xd8C.1\xd1?\xb4\xf9\xc5\x0e\xa3\xdaU\xbf\xe99\xc8@\xc9\xc9\xee?1+\xe4\x98\xaa\x85\xf8?\xff\x9d#j.\xb1\xef?a\x08\xc2^\xa8E\xb3?L\x9c\xddg\xcc\x11\xea?\x08%\xabqY\xec\xbd\xbf\x95\x1a\x05\xac\x11\xc1\xe9?\x84\xac\x11\xedz\xfc\xc2\xbf\xccm\xc0\xa4\xe6\xd2\xf7?\xd0M(\xef\x84:\xd7\xbf\xa15b\x1d\x9d\x86\x03@T\xae\xaf\xaf3\xe1\xa1\xbf\xb7\xd3z\xd8\xd48\xe0?:>\xf1b\xc5\n\xcb\xbfd\xaf^YW\xd6\xfb?\xba\xa48\xb8\xc1$\x93?r=U\x8b\xc3<\x01@\xd6\x9d\xaeR\x01\x8e\xe1?`gr\xfc%O\x07@^j%\x93E\xae\xde\xbf\x8cz\x96\x1f{\x19\t@\xfc1\xa4l\x14?\xb9\xbf\xd5e\xc5B"\x84\xf0?0\x1dE\x82\xf2\r\xc7\xbf\xdc_E\xc4?\xb1\xed?\xab\xd7\xff\x16\xdb\xe6\xf6\xbf\xdc\x07\x07\xd9\xbdj-@{\x89\xdf&\xc0\xca\xb3\xbf\x9e+2x\xadc\x02@\xda\x87\xb4\xa9\x01{\xaa\xbfP\xc8x ]\xee\xe9?\x04\xa7\x0cG\x13;\x12@\xc3\xbfR\x9a\xe92\xfc?\x9e\xade\xe7\xcc\x19\xb6\xbf\x83\xff\x8d\x0e@\x83\xd6?9\xf0Y\x90g\xc7\xb7\xbf\x17\xc8\xc1K\xadp\xeb?\xa2\x08\x87\xdeM\xaa\x91\xbfq\xe0$\x12\x05\xd2\xf8?\xcat\xaa&\xfc\xd2\xab\xbf\xb6\x9f$c\xab{\xf6?\xb7(\xba6\xdda\xc1?\xd0Z\xce\xd0\x0e\x97\xf8?\xaa\xd2\xc0d-\xc2\xcc\xbft\xc5\xaa`r\x80\xf3?\xc3\xd4\xebP\xca\xd3\xe8?\xaa\x04\xf8\xddj\r\xfa?}\xc0\x8d)\xb4\x02\xc5\xbf\x05G\xf4T\x9b%\xe8?1\xdb\xbe \'1\xb4\xbf-\xdd\x8c\xfcNF\xf6?\xf7\x0e\x06\x97.\x91\xc0\xbf]\x07\xd5d9\xf8\xf3?\xf01\xe0\xe6t\xb6\xbe?\x01\t\x15kYH\x00@\'\r\xa2\x08\xde\x96\x98?\xd1Pe:\xa3j\xf7?\xb3\xed\xa1\xf2v[\xa5\xbf\xfd\xea\x87)\x9e\xdb\xee?&2\xb72\xec\xbb\xb8?\xc3\rZ\x82\x19a\xc2?\xcc\\\xea)D+\xb9?DT.\xee\x11<\xc6?9\xaf\x95\x8f\xfb\x1c\xd5?0\x15n\x96zP\xee?\xa5\x90 \x13\x82\x11\xcd\xbf\xe49y\x1c`\xa4\xfd?\xbbM}\x9a*`\xc4\xbf0;\xe7X\xb9\xb4\xff?\xff\xca\xa4\xaf\x1b\xd8\xb6\xbf\xb5\xc0rKN.\xf7?^\xb2\xd8Iq_\xc5\xbf\xdc\xa9\xdcP\xdc\xf0\xec?\xbed\x8bD\x0c\xa1\xaf\xbfX\xd0\x82\xa4\xab\xa9\xdb?C\x1ev\xca\x07\xc5\xad\xbf\x84\xa6\xccO\xe3\xb4\xd3?x\x19\xbe\x05O\xf5\x97\xbfn\xf2z\x06\xc6\xde\xeb?\xe37\n\xb5g]\xc2\xbfed\x07\xe7\xbbJ\xfc?\xbb\x95\xd4\xa4mM\xd1\xbf\xb5IS\xc3\x04\xde\xee?\xd84\x14\xc0\x80K\xb4?\x05\xd2\xa3\x11\xd3T\xf6?\xf7\xc0\xef\xba3(\xa1?5\xc1\xab\xb7\xd6\x99\xd3?\x0en\x8b\x07-\xd7\xbb\xbf\xc1\xe5\xbaT\xb6\xf0\xe3?\x11\x93\n\xae\x8c\xb5[?\xb7\xee\x94\xb8\x10\x89\xf0?S\xd0\xbcM\xd0\t\xb8\xbf\x85\x86\x02\xf9\xf8\xbe\xef?\xb2>S\xa2\xe1\xac\x9c\xbfG\x9e\x91wq5\xe8?:k\xcf>g\xf7\xe5?\xe9\xd7>\xa3]\x02\x04@\xed\x1c\xe6~tN\xc8?,\x99\xe1\xdc\xcf\xfb\xe1?+1i!\xd4@\xc9\xbf\xdd\xc0\xdd?\n\xde\xf1?jC\x1e\r\xbdf\xcd?\xc0\xe8\xb3D_b\xf1?\x82X\xf2\x1f\xe0\xd0\x9e\xbfL\xab!_/>\xeb?7\xa2?\xee:\x82\xc6\xbfjH\xbd\x1e\xcb\x1c\xff?\xb2_~\x86t[\xbd?_\xddA:\x98\x0b\xfd?A?#\xe1Wb\xb6\xbfw\x9a\xd6\xa2\xa2y\xf0?fg\x10\xcc\xb3\xbd\xb0\xbfM\x9d\x9c\x88\xb0\x1f\xe9?Pza\xfc\x81k\xac\xbf<\x00\xa4\xb6%f\xf5?\x03\xd0}\x14\xe6\x86\xbc\xbf\xbe\x807\x10\xa1F\xf2?\x18=h\x0eK-H\xbf\xeezA\x7f\x1a{\xf4?\xb2\xdfWH\x0c&\xc9\xbf\xdb\xfe\xd9\xc6\x9d+\xf9?\xf5G\xfc\xc2Nr\xc2\xbfa\x91\xfdi\xd3\xaa\xf1?\x083H\x05\xcaL\xd2\xbf5G\x16\x95\xecU\x00@\xd8lg\xd9\x86\xc9\xd1\xbfGiJ\xeb\xda\x8f\x05@\x1a\xb0\xef\xe4i@\xb0\xbf\xdd\xdf\xee\x18\x9a\x95\xdf?\xa8\x9f\xe9\x13\xe7\xa3\xb2?\xacvwY\xa0\xab\xf7?P\x17zk/\r\xac\xbf)\x87bJ\xc9\xf8\xe4?Zz\xf4\xba\x84\x93\xd2\xbf\xad}\xdb~M\x8d\xfc?{N:\xd9I\xc7\xbd\xbf>\x1e?\x1d\x03\xc2\xed?\x04\xef\xc9\xee\x9f\xfd\xc0\xbf\xa4\xd9\xc1V\xaa\x1b\xf5?e`\xa5\x9b\xb3\x8d\xc6\xbf\xe8\xaa\x8c\x1fV\x96\xf8?\xed\xf6dn\x17\xc6\xab\xbf]w\x19\xe3m\xec\xe6?\xbeZ\x9a\x17\xd5\xb6\x9f\xbf\xaa|\xd7\x198,\xfd?\x12\x8f\n:]\xee\x93\xbf+|\xc4\x06\x96\x99\xf2?\x1d\x82!\x07\x85\xec\xa6\xbf\x1f\xc4=oh\x13\xef?({5i$\xf6\xc5\xbf\x7f\xf8q\xba\xa5\xf0\xf9?\xb2v\xb6P\x84\x81\xda\xbf\x8f\x86(\xa1mU\x14@3\xe8\xf8smf\xa0\xbf\x03\xc4\xfcy/A\xf0?}\xa3\xcd]\xebO}\xbf\xb8{c\xf5=\xe3\x04@{\x07\xc6VxY\xba\xbf\x1enm\xe6=\x9b\xe2?\xf5>a\xe5\xf4^\x93\xbf\x8ax>\x0f\xd8\'\xec?\x8d\x95\x1c\xddb\xce\xb7\xbf\x8aZ\xe6\x19\xd4\xc0\xee?\xf9\x8c\xe9\x83\x9d\xa0\x99\xbf\xbe\x00\x9f_\x1f\xa1\xf7?\x8e*w\xc8\x979\xdf\xbf\x1aE\x1c\xc2\x0bu\r@\n\x15\xd32\xff\xf8\xdc?TCx\xf5sm\x01@\xa5lGj\xfd\xc5\xa0\xbfn\x8a\xba\xea\xb8?\xd7?\xaa\x13,\x8d\x9c\x11\xac\xbf\x8e)\x83\x1c|S\xfc?\xddK\x84u\x1d\xb2\xc1?\xd6S\xd8_}\x14\xf3?K\xb6\x97u\xf6\xac\xb2?\x81\xe1M\'\xbd9\xf7?\xb4=u\xf7x\xf8W?\x9b\x087\xbci\x9e\xf1?\xa9\xdd\xcc\x89p\xc3\xa4?\x02\x0eNp\xcd5\xf0?\x93\xe9N,1/\xa8?\xf3\xe0\xc1\xfb}3\xf2?\xe0\x90$\xe4.\xec\xb2\xbf\x176\x88\xe7*$\xf6?f\t\xe0"\x06\xcf\xc6\xbf\xben\x95\x7f\x80\xbc\xeb?\x83\xb1\x0fhAM\xc1?\xec2\x12\x84.<\xce?\xac\xd6\x94\x80\xa0\x16\xbe\xbf.W?~\xaf~\xf4?\x81\x01\xba\x88\x11\n\x99?\x83\x8al\xc9!\x0b\xeb?\xd0\'\xae\xf1\xb49x?\xf3\x92n\x92\x92\x13\xd6?\xc8\x97\xcf\xb7j_\xb2\xbf\x8b\xc3\x7ffE\x84\xe2?\x91\x9e\xef\x88C;\xbb?q\xfe\x0b\xd0gD\xc6?:\xaej\x8d\xea\x9b\x95\xbf\xeb\xb3C\xe7*+\xf1?\xc1% )\x1c^\xd0?\xaak\xa9x\x82\x0e\xf8?\x92;\x08^\x06\x1b\xca\xbfS\xce\x99J\xbfw\xeb?\xe5G\xfc\x17\x02\\\xd1?~Uf\x0f\xd9\xaa\xe2?<\xce\xc99\xb7\xd7\xc7\xbf\xda6\xc5\x88>G\xfe?\x18\x16\xd9\xf3\x0e|\x93\xbf[\xf6RJ\xd1m\xeb?\xb4\x899\xcea\x7f\xb1\xbf\x01C(x\x0f\xbf\xe9?\x12\xd7\x06\xba\x91\x9c\xb5?\xeb\x16\x9d\xad7\x04\xde?\xe0#\x03\x88\xd7\xef\xbf?\xcc\xadYH\xb5/\xe7?M\xd0\x9f\\\x12T\xb6\xbf\xd9\xb5\xb7\xf7=F\xe2?\xc6\x9b\x7f+M\xdb\xd2\xbf\xf9N\x1a\xf7p\xbc\xf1?\x00\xb4\xbe\xd3\x1c\xa5\xa8\xbf\xe9\xae\xd2\xc6\xa3\xe0\xf1?\xfe\xb4\xfa\xb1\xb3\xda\xe9?\x1cT\x9f\xf6\xe6T\xfd?\x1d\x80\x1d\xebf\x91\xb1\xbf\x95\x80\xf4\r\x80\xc0\xf2?\xed9\xb0\x9evw\xbc\xbf}\xe5\xc2+\x8a\x80\xfa?\xc6\xeda-b#\xf4?\x17=dW\xc9\xaa\x02@j\x87(\x0fR\xa8\xad\xbff\xad\xd3\xaf\x04x\xf1?\xf4E4]N\x89\xc4?\xe1\x18ng/n\xb8?\xf2&\x17\xb3\xa0\xfd\xe6?D\xfd\xe7\xb9d\x15\x08@;\xf0*\xdb\xc5\xc7\x9b\xbf\x17\xb8\x04\xffv\xe5\xf0?\x95\x18\x80K\x9f\xa2\xaf\xbfZ\x0b\x97Z\xaab\xf8?Z-\xf0Y\xe1\x1b\xb9?X\x91N)\xdc\xf0\xf0?4\xe26\xf2\xc5\x0e\xc1?\\\xb1\xa7\xac\xacR\xd3?.\x99\xe7=\xc1L\x86?\xe6\x9dYg(+\x0e@\x83\x18+fDwy\xbf|\x12\xd2\xbe\xc5[\xf8?\x90\xb3\x9e\xc4\x88.\x8e\xbf9\x0b\x83#\xe1\xbd\xf4?\xa1\xd5\xa3\xa5{\xe0\xa7\xbf\xb9I\x05\x9f\x82\x18\xdd?\x92\xe3r\xa7m\xdb\xce\xbf\xf3\x11\x9f\xc8\xbb\xba\xf0?\xd0\x9dAL\x97\xfb\xc8\xbf\x97\xbc\xb5/\x15\xd8\xf7?Y!~\x7f\xfb\xfb\xc3\xbf\x8a\xf3\x15\xf6vJ\xfb?0{\xc5(\xc0 \x8a?\xe1xL\xc4\x07b\xf3?\x16P\xa7\xe0N\xa2\xbd\xbf^6}\xa4\xbd\x98\xf0?y\r\x1e2Sa\xdb?\xcb\xc3Qax_\x05@\x8d\xe8\xff\xeb\xf2\n\xb4\xbfu\xc7e2<\x1b\xe7?\xbcs\xd0\xe8V\x01\xbe\xbf\x04\x15(6\xc4\xce\xff?\x94(.\x0b\xdbN\xc5\xbf\x9a~\x1e\xb4 \xd5\xf1?|\x04o\xa28\xe1\xc1\xbfO\x1eI\xcd\x1d\x0f\xe7?\xd3\xd10\xae,\x06\x9a?}\x91\xd2\xb7a\xd3\xef?\x9d4\xc79\xdb\xa8\xcb\xbf\x15f\x13\xc5\xa5)\xf3?:A\x98\xc3\xa3\xc8H\xbf\\\xae`D&9\xf3?H!\xf2\xdf\x8d*\xe3?\x8ca\x19\x8d\xc2\xc4\xea?&\x1e%\xc3\x10c\xb6\xbf\xde\x12\xb9\xd7\x08\xa2\xd6?O\x1a\x1aIa\x1d\x9f\xbf\xce\xba\x10\t\xf3q\xf0?m\xd07\xb1yO\xc4\xbf4\xbc#\xba\x02\x12\xf2?\xf9T\x17m\x8f.\xc3\xbf\xad\x16\xe4\x92\xf1S\xf2?X\x8bhZ\xb5\xe7\xcd\xbf\xbd\xfb[\xf5\xc9\xe1\x02@\xbd%\xbeC\x1ax\xb6\xbfD\x12(\xc0\x10\x1f\xed?\xaf\x89b\xfb\x91W\xb8?\xe8\xcb\xf5\x92\xdaw\xf4?\xd7q\xa3\x1e\xf0\xca\xc0?~\x1e\xa7S\nt\xe3?\xd5y\x12\x8b\x15\x07\xb2\xbfbF\x86G\xd6P\xf4?\xca\xa5\xefs\xeb\x95\xf2?\xdf\x8f\x91oOE\xea?W\x18\xdf\xfaf\x87\xcf\xbfB\x83IQ\xe17\xf0?\xd5\x87\x88fD\x91*@\xe0\x93\x7f\xda\xe5HT@\x88\x86cG\x81\xe8\xc1\xbf\xf1\x1f\xde\xa0 \xac\xf7?\xa1\xf6\xf7e\xb1i\xc2\xbf\xbe_\xe0\x89\xbd\xd7\xea?\x8e\xb8\\\xa5\xf1%\x14?S`hT\xdc\xb8\xef?;X\xd0\xfb\xcf\xab\xc5?\xa2\x97\\a\x80?\xd2?\xe9\xb0\xbeh\x96\xfd\xb8?V\xf2\xe0\xa4a\xa8\xed? gI\xfb\xef\xec\xa5\xbf\t3\x06\x8a\x00\x02\xd4?\r\xa8\x07*\x13N\xd0\xbf\x04\x89\x8b\xe2\xbb<\x10@\xc3\xd7\xe6,k\xda\xa6\xbf\xf6f\xdb\x8b~m\xec?\x08\xf5\xaf\x16\xe3I\xbb\xbfE\x03\xaf\x07Pp\xf6?\xfa\xe7\xbe\x15t]\xcc\xbfr\x95\xf1\xe8K\xf2\xf2?\xf7a\xe3g}\xea @\xe0q\x1d\x1b\xf7\x93\x10\xc0\xd16\xad\t\xb2Q\xb4\xbfZ\x9a \x1ap\x89\xe7?9ow\xb6\x7f\xca\xd4\xbf\xd8;\xc5\xc1\xc4y\x04@F\xbe\xc6\x0bB\xfa\xe1?\xbd\xcb\xb1\x0e\x12A\xfb?\xb3\xbbx\xd0\xd7x\xa6\xbfL\x90M\x8d\x93k\xe3?\x87\xe8\xf8\xaf\x1d\xfd\xc4\xbf\x111\xcc\x11\xe1\xec\xf8?C\xffH\x04;f\xa7?\xe5\x05\xd9\rU\xdc\xf5?\xf8\x02]\xa8\x99\x99\xb6\xbf&\x84\xe4fqK\xfa?\x8d\x83e$.`\xb0?\xd5\x10\\R\xe1\xe0\xf2?\xad\x80\x89O\xba~\xc3?\xb2d\x91\xdfkO\xe5?C0\x0c\x8d?#\xa0\xbf?s\x8a\xe7xA\xc7?s\xdd\x9f:\xd2\xc1\x9f\xbf\xa6\\cq\t\xce\xed?\xa3s2P\x8d1\xce\xbf\x90\x8d\x01s\x83\x19\xf3?\x83\xe8\xf33\xaf\xbb\xc2\xbf\x147\nT\x92P\x05@.\x1e\xdf\xa2\xac\xe6\xc1\xbf\x87~Dy7\xdd\xf9?\xf6c\x8eE\x91\xdf\xb5\xbf\xd7*.\xa7@\x9c\xdf?\xc6\xc3\x0f\xdb\xb5\xdb\x9d?\xe8\xb5C\x82+\x1b\xee?U\xc1;\xdf\xd1\x9d\x90?\x18*t\x9cB\xa5\xf0?#\x99\x84\xe8\\N\xc9\xbf\xba\xbe\x9b\x0b\xfcy\xf0?\xf3\xda\xaf\xd0\xf2\xbd\xd6\xbf\xbex\xb1\xae;n\xf4?'
p142
tp143
bag2
(g3
(I0
tp144
g5
tp145
Rp146
(I1
(I2
I319
tp147
g12
I01
S'\'\x94\xf6\xccc\x9c\xf2?l?\xdf\x1a\n\xc6\xe2?\x0ejW\x08\x06\xdb\xd6\xbf\x978m\x06\xa6\x80\xfd?\xa2\x968\x13\xabJ\xf4\xbfR\xed\x18f\xce\xa3\x12@~\x04\x98\x16\xaeP\xe3\xbf\x89\xd0\xe2\x94\xe4\x96\x1d@\xbf\xf3_\xa40\xa1\xbe\xbfKa{>I\xe4\xf4?\xd8\xc7$?/\x93\x9b\xbf\xa3b-\xe1\xb2\xb6\xeb?\xd6\x07"\xaa\x90\xc2\xc5\xbf\xe16\x05Q\x19\xfc\xf6?%[\xec\x18C\x9d\xfd?_5\x17\xedf\xc7\xf3\xbf\xcf\xea\x86\xe6\x06\xf5\x90?\xe4t\x11y7\xbc\xfe?\xad\xf2\x8f\x9co\x86\x92?I\xd2r\xc4\x9c+\x0b@\xe4\xeeJz\nQ\x9b?-N\nm\xf8\xd0\xe7?\xff\xcb\xe3, \x19\xbc\xbf\xedV\x8e@\xac\x17\xef?\xf9\xbc\x0f\xfa;\xcc\xc7\xbf\x8a\xf4%O\x0e\xce\xf7?%\x18\xd6Z8\xfe{\xbf\xb1\xb5 \x9bc\xb5\xf2?\xb1\x1e\xe4<\x99\x94\xb6\xbf\x88>}y\xf1\x9e\xf5?E\xe3\x83Zz]\xa3?\xf1r\xf6\xf2i\xb5\xed?\t#\x13\x159F\xc3?\xd2\xc4&%kw\xf3?\xf5\x04|5\x7f\xcc\xc6?<4FMf`\xec?\xc8\x937\xc7a4\xcd\xbff\xa1\xb6\x14w\xf0\xf1?C\xb1\xf2\xda+3\xd0\xbf\xdb\x96z?(>\xed?\xedJ\xd1\xd4\xf60\xc2?af\xe9\xc8\xb0\xa7\xe4?\x87d8:\xb2\xf2\xae?\xb9s\xaa\xb0\xbe\xce\xf8?t\x8b3\xfe\xf4\xee\xa8\xbf\x1d7\x8c\xff],\xeb?\xb3\x8b\xeb\xce\xc9"\x9c\xbf\xd0i\x88l\xc8\x9e\xf1?|\xbd3\xc9X\xe6\xc2?\x1d\x86\x11\xaf8\x05\xb9?I_\x85W\x04$\xc3\xbf\x9f\\\x15R\xc0#\xe4?\xa8\x84\xcd$\x8c\x01\xba?:\'\xc1\x86\xcd\xef\xf0?\xe3\xaa\xf6Z\xb7+\xa6\xbf3\xe9qh\xebV\xef?\xfbY\x82\xd4 \x8a\xd0\xbf>\x02\xd5LL{\xfc?\x85\x92\x00\x03\x1c\x8d\xbb\xbfY\xc1^\xfb\xbdq\xf0?&s\x17\x9fJ\xa5\xac?i\xbd4\x94\xc7\xc3\xe0?\xee\xc0\xcc\xa44\x7f\xc1?}\x07\x9d\r\xfa\r\xe9?*n\x8a\xf0\t/\xb6?\xd7\xb5\x05\xb0\x9e\xc4\xf4?2\xabu\xe6\xccI\xbe\xbf\x1c=\xb2\x14\x8a]\xec?$\xf9\xedV\xf5\xf5\xc9\xbf\xc4GU\x14\xa5\x02\xf8?\xbc\xe6k\x883\x8e\xab\xbf\xa2)\xcd\xa2\x9c\xf4\xf1?L\xff\xfd7\xce|\x8e\xbfB\xb0\x9f\x8f\xbf\xe4\xd8?\xd1^\xfc\x14\xe2:\xd2\xbf\xd1\xc88\xfb\xf1\xf2\x03@\x1f\xeb\x9c\x99g\x1b\xac?\x87\x87\xa7m\xa4\xe6\xf2?m\x7f|\x12%\xef\xe2\xbf\xb475$\xac=\t@H\x0b<\xe3\xe4\xcd\xc0\xbf[(\xf3\x91\x87\x12\xfb?\x8e\x9dz\xa8\xc9$\xa9?\x02\xa5\x8c\tS~\xf3?\xe1\x89\xad\x83\x0b\xa8\x7f\xbfl\xe3\x14R\xa1\x9f\xe3?5*\x1d\x18\xe5\x91\xb9\xbfn\xeb\r\xba\x0ck\xe9?\x9d&\x11 \xf3\xa3\xb6\xbf\x1b\xda\x03\x85q"\xe4?.\xf4\xdf\xadD\xe9\x98?\x10v*_O\xd0\xda?\xbe\x06\xdfd\x9b\x97s?]\xfc\xcd[\x15\xde\xd1?\x94\xd93\xba \xde\xe2?9\x11\xc2\xe7\xf7\xd1\xfc?\xfd\xd7d\xb1\xf0\xcf\xdd?\x1e7\xa6%\xecS\xdc?\x17\x01@\xbby\x10\xd4\xbf\xd5\x8d\x8dv\xeb\'\x01@\x10\x88&\x99\xb7\xd5\xbe\xbf\xf4l\rz\x98\x88\xf7?\x9c\xb8\x11\xdd3\x84\xd0?\xcdz\xcc\x94\xa6\x00\xf4?\x8f\x91\xa0\x86\xb9\x12\xae\xbf\xf3\'\x92\xff?\xa9\xed?)F\x86\x8b5d\xa8?\xd3`T\x19&\xae\xd8?\xb3\xaf\xa8\xb7\n\x87\xdf?gG\xd0>(\xe7\xf2?\x8b\xf5^\x18\nK\xb7\xbfj\x02C\x94\x10\xfa\xe0?+\xad\xa0\x8dk\xd4\xb0\xbf\xacn1\xad;\xa5\xe0?\t\xc6yp\xdb\xca\xa4?S\x9b\xb6\x183\x82\xf3?\x9di\xf7"\xf2&\xc5?\x7f\x9fT\xe0{\xe7\xf1?\xaer~3\xe2_\xac\xbf\x12\x15\xd4\x90}\xbd\xe8?&z\xe0l\x86\xa1\xbb\xbf\xa3\x89$\xa9M|\xe9?\xb6z~g\x8e\xe6\xd0?\xea\xb2B_\x07\xe2\xd7?\xdet\xbd\x85sb\xb7\xbf)\x96\x01\x10%_\xe5?<\x91\x1fb\x13\x11\xae?\x9e$\x95b\xbd\x83\xe3?l\xc6W\xdf(\xf2\xbf\xbfD`@\xb8x\xfd\xf0?>\xd7(\xde<\x8a\x98\xbf\xec\xd60\xe47-\xd8?\x92\nkK\xad\x9b\xb3\xbf\x98\x8c,\xaf2\xf6\xf4?=\xdd\xf0\x83kY\xd1?\xdd\xf3l,D\x1b\x95?\xa2O\xf6S`5\xd1?\xce\'\xe0\xba\xfb\x92\xfb?@@\x123\x98\xe4\xd7?\xbf\xb2JK\xdcv\xf3?\xba\x90\xa0\x82\xa3\xa8\xd3?\x16\x02bY\xafU\xde?56\xe8\x03\x8e\xe1\xb9\xbf$x?mo\xbe\xe6?\x89s:\x1d}Y\xc0\xbf~1\xd3\xa2\xbbD\xf6?\x1d\xc3\xa14&\xef\x9f\xbf\x16\x05<\xcc\xca\xc4\xd6?cB\x93\xd7|\xb7\xb8?pc\xcb\x95\xfc\xd0\xf2?P\xe6\xe4\x9e\xab8\xa0\xbf\xbe\x932\x95{(\xdf?\x17\xd6\xd3\xffrO\xbb\xbf\x1d\x96\x0c[\xb6:\xf1?\x19\nD\xa8C%\xc4?\x08\x91\x93\x05\xcb\x00\xd0?\x01\xf9\x0b\xcd\xe8k\x14\xc0r\xfa\x9d\x8b\xdap6@\xe0o\xea\xe6,\x16\xc7?\x98\x14\xf7\x1aP\xac\xfb?\x01F\x08\x18\x86\xbe\xb2?\xe3\x15^\x01\x19F\xd4?Nd1A]\n\xe9?\xe0\xa2v\x87e`\xfc?f\xeb\xa1\x1b\xd2X\xc4\xbf\xd2\xfb\'\xad\x84H\x01@\x85:\x06\xb2\x99\xbb\xc5\xbfJ\x8em\x0b#\xf0\xf6?f\x05i\x0fQX\xae?*\x87\x8fG\x12\x10\xf1?\x8bx\x91\x8d\x97\xe0\xf6\xbfn\x9f\x8b\xe85\xd4\x16@\x9aG\x8b\xd7b\xa8\xc6\xbf\xbc\xc0Rwfj\xf6?\xf1\xa7\xa0\xb8\xea\x1e\xaa?\xb6\xc8d({\xc2\xf1?\xed\xbd\x86#&S\xc5\xbf3\x889\x97\xf3-\xfc?\xeb\xa7\x9e"\xd0d\xc6\xbf\x1dz;\x89\xe0\xbd\xfb?S\xd2\xfc\xc0\xc5\xc7\x96\xbf\x07(!L\xa1\x7f\xf5?-ui\xc2\xe9H\xb6?\x04\x00\x03=\x06\xf9\xd6?\x05e\xd1\x1eM\xb7\xa6\xbf\x8c\xb9\xec\'\x15n\x0b@J\xc7\x98]\xf5G\x9e\xbf\x18\x9d\x7f\xc0\x06\xf6\xe9?d]\xd05,\xa3\xcc?\xb4q\x8a\xb02\x95\xf6?q\xd3\x7f6\x95N\x03@\xfaHNx\x7f \xcf\xbf\xb3\xd3r\xd1\xa5\xd1\xa5?L\xff\xf2\xaa\x19\xc3\xca?\xde\xac\x86\x16\x98\xfd\x91?\xddm\xf9P\x9a~\xc4?\x135\x99:\x89o\xf8?\x1cb(~b\xcc\xdd?\xf6n\xe6\xc5_\xd4\xdf\xbfC\xa6\xfd\x13,\xfe\x0b@tB\xe8VU\xf7\xc3\xbfW\x7f\xd4\x04\x7f\xeb\xf7?\xe1\x97\x8d)\xd7\x0c\xa3?\xdd+\x0bR\xda\xe0\xb0??\xd8\xd7\xf9\xef\xfa\xca\xbfl\xe9K\x13U\x1a\xf8?\xb1\xce\xab\xe7\xd7=\xbd?X\xb5j\xd8T\x9f\xe0?|\xe0\x92\xb9(\xa4\xee\xbf[\xbcI\xfc\x03\xd6\x17@^\xe3t\xd9(\x10\xd1\xbf\x1a\xf0.N\xdf\xe0\xf8?\xc1\xc4.I\xc3\xe8\xcb\xbf\x15\xf0N=\x0f\xa2\xf4?=+\x1e\xad\xc6\x9d\xb9\xbfO\xcc8(\xbb.\xfc?z\xa7#&\x18\n\x90\xbf\x06$t\xa6H\x00\xf1?\xf9\nl\xe2U\xe1\xb6\xbf\x17\\\xe0U\xa9{\xf0?\xeeY\xb8\xe9D\x8f\xb4\xbfh\xcc\xec;\xa8\xf4\xf1?2\x9a\xcb\xa0\xf5\xc0\xa5\xbf\x81\x94\xaf{\x01\x11\xf6?\x8b\xac\x9a:A*\xa2?Io_\x1a=[\xf2?\xdd\x17\x97\x0b\xd4\x92\xa9\xbf\xdb\xab\xf0\xd5\x92\xe4\xe5?\x92\xf5,=Qd\x93?\xc1.\xc3\x16\x9a5\xf4?%\xae\xe69\x1a$\xea?\x97&\xba\xb2\x97$\x03@\xb7}\x8d\xb7\xca\x1f\xc2\xbf\xb7\xf2\xf4\xac\xde\xfb\xdc?\xfb\xcb\x9d\x04}f\xb0\xbf\xd4\xbf\xa7\x86[\xa4\xf6?)E\x82\xc1+\x906\xbf-\x18\x98\xadI\xf1\xe0?\xa3\xe7R\x13\xe7W\xc7\xbf\xc8e\xfb`W\x89\xf9?\xe3\x1f\x92\x88\x16\x19\xae\xbf\x08-c\x82\xa2\x9d\xea?\xd4c\x92\x1e>2\xd1\xbf{f\xa3.[l\x05@\xb8\xa9\xedb\xb4^\xb8?\x0e\x18Y\xb6\xfa(\xda?3\xfe9u[\xde\x85?\xf4\xa3C\xd24\x9b\xf0?\x85\xa8b\xe7K??\xbf\xde\xfa\x05*\xb2\x0c\xf9?B`\xed\xe5\xf0\xa7\xca\xbf\x96\x9e\xec\x85\x970\xfa?\x86by\x13Wd\x81?\xa3)P\x01~\x17\xe0?)\x04\xd0\x0c\x90\x1d\xc0\xbfK\xd4\xf4@9\xed\xf7?\xd0\x10\x8a\xf4T\x02\xee?\x11\x984v\xa5v\xe8?\xb3\xe2\xfe=\x8b\x16\xb9\xbf\xf1t\x87\xb1\xedt\xfa?\xa9\x18WMI\x97\xb7?\xb5\xa3 c\xd9b\xe8?\x1c`\xb2\xc4\r\x1d\xb6\xbf\xcfl\xc9~\xa1\xfb\xf3?8\x8c\xba&\x87!\x96\xbf\x89_\xfeXFv\xe0?\xee\x8amP\x0c\xd8s\xbf\xba\x0e\xecV^v\xef?\x7f_\x934#\x01\xa8?\x02\x02\xf8?x"\xe7?\xf7\xc0e\\\xb0<\xac\xbf:\r\xc1\xfebb\xed?\x10\xbb#\x07\xff\x9b\xe0\xbf\x18\x97\x95\x91\xf8\xfe\x05@\xb7\xd0\xbf|`6\xce\xbfTSw\xfb*4\x03@0\x8a\xa2\x04$\xfc\x08@\xf6TS\xaa\xa3J\xee\xbf\xa3uF;x\xe5\xae\xbf\\\xde|l\xe2q\xf5?\x1a}u\x1f\xf5T\xb5?\xf5`\xfcu\x1c\x93\xdd?\xf8\xd1z\xbeD\xbf\xcc\xbf,G\xf7\xc4\xf2c\xf3?\xd8\xa8\x16\xf3\x1aa\xf2?\xc2\x84\xc0\xf9U\x9b\x1b@\xfeI\xfcd\xeb\x96\xc1\xbf\xb2Q\x1b\xfcE`\xea?\xc0\xe1\xf0\xff\x0e\xd5\xbe?8F_7\x08@\xed?\xa7\xdf0[\xf3K\xff?#\xac~\xb8\xc3j\xfa?G0\xce&\x1b{\xde?\xb8D\xd0e\x83\xc3\xee?\x8aQ\xf6U\x98Q\x90?qX\xdf\xac\'S\xcf?\xac\xce:\x9a\x1fR\xda\xbf\x9a>\xaa\x86\xa6%\x12@\xd6j\xcb\xc1:\r\xd4?\xcb\x04\x9aH}\xe9\x02@\x1e0\x86\xdfA\xbd\xbb?\xd9\xde\x84\xfb\xc5P\xe2?\xdf\x91\xc1\xf7\xc2p\xe8?\xbd/\xc7\x84g\xc9\xf2?\xcfm\xaf\xd7\xcbA\xc7?:vZ\xf3\xc8M\xf7?w\x11\x8c\xb5\xf7O\xe2?KxO\xe2\x10\xc9\xf9?\xc2\\\x18\xc0d\x9f\x9a\xbfK\xf0\x9fK{\x89\xf0?S>\xca\x80\x9d{\xbb\xbf^\xe2p\x1f%\xda\xf4?{\xdb9(\x95\xd3\xb3\xbf\'^\x9f\x02\x85\x8a\xea?\x9fw\xd9d\xc7)\xb1\xbf\xf1\' r~1\x06@\xe4\xe47\xb0%\xa7\xdb\xbf\xe9\x8c\x99\x95w\xee\x06@i4\xc7y\x0b\x9a\xf9?\x981 \xa5.\x1f\xf1\xbf\xac\xcdS&v3\xb1?1\xbf\xa9{\xa0\xc5\xf0?\xc5|\x1b\x1b\xfc\xc3\x98?x\xb7\xf5\xf2\x9b<\xe7?\xa7;d\xd7(3\xba\xbf2\x8c\xc9(iP\xf0?\xc1\x06\xda~E\x89\xa2\xbfV\x13\x0e\xdbC2\xf0?L\xd8~\x99\xeb_ @\xf9\xfd\xaa8\xc72\x18\xc0QA\xbd\xe8\x12\x02\xb4?\xfcGe#7\x91\x02@2\xa6\x87\xc8g\xa8\xaf?m\xe0\x9e5\x8c\xdd\xe9?\x7f<\x1dE;\xa1\xf0?CV\xf61X\xb7\xd4?K-x\xc4\xa9L\xbd\xbfh\x13\'\x99\x98j\xf0?z\xf9\x9a\x8f\xddp\xb2?\x88-\xb9\xbbB\xc1\xde?F\xfa\xbe%=\xac\x8a?BW\\\xe6\xce\xc1\xf2?O\xf2\x7f\x88\xc9\x12\xc4\xbf\xca\xcdOQ\xe3\xd7\xf9?Z\x90\xfbt<Z\xf2?s\xeaL^g\xe9\x07@\xcau\x81;d_\x9a?\x8f\xca\'*\xfa\xf0\xc6?\xc0\x8f@~ c\x15@\xa2g\xf5\xa20\r\xfc?)\xe3\'\xbc\xac\x04\xa7\xbfz\xae\x88\xbfG\xa5\xea?\x02k)\x8b\xed\x10\xce\xbf\xf0\xf9\xb0\x84\xda\x15\x00@\xd8,\x05%\xb2\xc6\x93\xbfS\x97S\x8aL.\xe9?\xc6\xdf%\xc6\xacu\xb1\xbf\xe2n\x84\x0c(\xd4\xdc?\xa4\x151\x9a\x1a\x85\xb9\xbfU\xac\xb6\xde&\xcc\xf2?\x9brGx\xbbX\xd1\xbf\x0c-\x03\xc4\x15o\xf6?\xb95 \xce\x0b\x01\xd0?C\xf1\x1a\xb41+\xdf?fSe\xcf0\xa8\xd7?V\xf5\xa7\x9c\x83\x96\xfc?\x83S\x85{\xa8\xd9\xbd\xbf\xa6\'\x17\x08H\xc9\xf9?\x16\x0e\xe9\xbd\x94\\\xc1\xbf\x01\xbdA\x87F\x18\xf7?^\x14\xebi\xbfN\x96?\x92F^\xbf\x1e\x06\xf0?\x0f\x9b\xa5\xdb\x0e\xed\xbb\xbfF\x0f\x82\x99u\xb5\xe0?<\n{@\xcb\xc3\x82\xbf~\xf66\x15\xd3N\xe0?\xa2\xf1rg\x02\x87\xb3?\xf4\xa3{UH\xbd\xef?\xad5B\xac\x07U\xd8\xbf\xbd\xfcM\xf0\xddC\x03@\x15B l\xa6\xb8\xe7\xbf\x9aW\x8a\rS\xe1\x04@"\x17\xe1\x80\xfb\xe0\xb7\xbf\x0f\xc5[\x04\xb5\xaf\xe0?>S\xf0\x82\xfd\xda\xb8\xbfB\xfcZ\x03\x8a\xaf\xe6?d\x0f\xe4\x00\xf8\xca\xc4\xbf\xb5\xa5\x04o\x13\xbd\xe8?\xa1)\x08\xb7jN\xad\xbf^@\xc8\t\x80\xaf\xda?\xdd\x1f\'wT\x13\xba?\xd9\xf5\xabp\xee\xa5\xc9?\x8a\xfav\xce`\x19\xb6?W\xfcO\x99\xaf\x08\xf1?}6\xe2dhb\xc1?\xb4\x1e%\xa5\xe1\x0c\xf4?\xde\xd4\x8d\xd45\x9a\xb2?\xb1\x96h\xfd\x99\xf5\x00@\xa3\x9ag\x91\x9bH\xaf?\xf8>;\x15\tu\xf5?rk\xa7#\xed\xe5\xd4\xbfCw}x\x162\xf8?Ayb\x87do\xd2?PW`s\xa1\x83\xf5?\xad\x80\x07\xaa\xae\xc8\xc4?\xd2m\x1c\xad\xb3B\xf4?H\xac;\xc0\xc6\x9b\xb4\xbf]W\xb77\xeb\xd7\xdb?\x8c\xee\xd6J^i\x9a?\xff\xb3A-\xb2\x0b\xf2?\xf1\xc4n\x14\xf8g\x99?Myw\xb7\xc6\x94\xf2?\x85\xa6.\xf8\xa9\x85\xbe\xbfu\x0b\xe7\xce\\(\xea?eK\xa0[K\xd2\xc5\xbf\x0c\xdf\x0b\x99M\x15\xfa?\xd3\x88cz :\xc3\xbfgZ\xb2\xee\x9d\x03\xfc?\t\xe0:V\xba~\x84?F\xc62\xa8\xf9\xc6\xce?[,\xb0}\x88\xa6\xad\xbfu\xed\xb0\xa2p\x82\xf2?\x01\xb2hW\xb4\'\x83\xbfB\xd4\xf5\x8a\xf0A\xe8?\xacN\x0f\t\xd0&\xd4?\xf0\xe5\xfb\xcdN\xf7\xf2??\x9a\xf1y~\x84\xb4\xbf~\xea\x18\x1b.\xce\xf7?\xb8k\xb3\x053\xac\xc1?e\xda\x0f\x00\x18\xef\xf1? \x00\xb3=\xf9\xb6\xb1?\xe3\x05\x98\xd8q\xd2\xe0?M-X\xa7MN|\xbfs[\xe1\xc6\xb1\x9b\xe7?\xaf{J=\x19\x1d\xb4\xbf\x94\x1c\x03\t\xa6\x0c\xf7?\xda\xcfL 5\xb7\xb8?\x86\xda\xb5\x89\xf2\xc0\xe8?\x96\xcc\x1bM\xf0\xdc\xb3\xbf0W\xce\x04\xf2\x1c\xeb?a$]\x83\x80\xb8p\xbf\x82[\xd2\xacK\xb8\xed?\xc9\x98\x83\xf31\x97\x8c\xbf\x0b \xd3\xf4\x05\x0f\xe2?;uOP\x02\xf4\xc3\xbf\x16qlm\xa4\x88\x01@\x96\xe4p\x05r\xe9\xc3\xbf?\x9ei\x86\x94Q\xf9?\xa7{\x9ai\x05\xc1\xce\xbf\x0c\x11w\xd0\x1c\xe8\xf5?r\x16\xe9\xd9E\xe8\xbd\xbf\xc4|\x04\xcf\xcc\x11\xf1?\xa3N\x02\x0b\xfc|\xb0?\xbe\xa4[\xddM\x02\x01@\x18\xa8\n9\xd7\x88\xbc\xbfT\xf0\xb5P4\xf7\xf3?G\xf9\x8a\xa6\xa7\xa9\xa1\xbfn\xb6G\x1e\x9a\x99\xf2?v\xce\xeb\x11c\x11\x9c\xbf\xf3\xdf\xdf\xef+\xc4\xee?\xd8b\x08\x84\x9e\xa3\xb0\xbf\x19\xbd\x15\x0e\xf9\xd2\xf7?\x14\x87\xa9\xa4\x11\xf5\xb3\xbf\xc6Ar\xadC\xb0\xe5?V>\xc2\x9ard\xc2\xbf\x98\xf1un\xe1P\xe6?\xc0>[)\xc5\xa9\x9e\xbf"\xb8JD\x04_\xe8?\xb8\x91\x12\xda[\x91\xbe\xbf\xc0\xfb3\xc3;\x10\xf9?\x93\xfbu\xcde\xa0\xd1\xbf\x84l[\x1c\x14\xf9\xf9?S\xf1\xe3\x97\x96\xb2\xc6\xbf\x8ea\x8f\x90\xd6\xca\xf3?\xc5\x8fH\x96\x08\x1a\xc2\xbf,\xe60>,\xef\x0e@HC\x81\x92W\x19\xc2?mj\x0c;\xc4y\xf1?\x7f\x91\xbf\xb92\xb3k\xbf6\xdb\x18\xec\x8d\xf1\xd6?\xe3\x03J\x1a\t[\xb7?t\xb8\xf4\x90eH\xd4?^\xa7d\xffU\xa9\xa5?\xdb\x07\xb0r\xd6{\xf7?\x06\xa4\xbd\x82\x14\x94\xed?\x8e;\x89\xa1x$\xfa?\x0f\xefhH\x06\x8b\xc2\xbfVw\xd2\xe4\x96m\xf1?"\x1a\x00~\xba\xab\x95\xbfG\xbc\x92\x1e\x87R\xdd?N\xf4\xc6\x8bB\xab\xb5\xbf\x08]\x82\xc6\xe0(\xf1?\x01U\x0b\xcc\xbc\xdb\xb2\xbfs>\x8e\xb1Kv\x00@\x89\x05\x0fi15\xd1?v\xc5W\x98\xcf\xc7\xdb?Q\xaf\x0e\xd7_w\x96?\x90\x99f\xe86\x0f\xf7?\xdd`/\xbb\xfdT\xb4\xbf\xea\x8a\x8e\x8fQ\xbf\x00@ \'\xfb[\xc9\x18\xc1?\xe4z\x84r\x16^\xd8?\xe0\x9c\xef\x980}\xab\xbf-\xdd\xdf\xc2q\xd0\xd0?\xac\xd3\x89]!\xd0\xb6?\xbf\x1c\xd6\x95\x94\xe0\xe0?\xc5\xb0\xd5-\xb7?\xcc\xbf\xf0b\xc3h\xabC\xfe?\x1a7\xd5\xbf\xf6d\xc5?\x83\xca\x1c\xd3Q\xa9\xab\xbf\t\x9fA$A\x16\x7f\xbf\x0b\xfe0\xda\x19]\xeb?\xf6\xed\xc1\xadi\x99\x88?\x8a\r\xf6\xcb\xeea\xeb?\x15\xadrM)\xa1\xb5\xbf\xeb7\xc3\x1a\t\x8c\xe4?\xca,\xff\x196\xe3\xd1\xbfC\x02\x0b\xa4\xbf\x8b\xfd?\x00$\xc8IrX\xa8?/\xf6\xfa\xf7,v\xdf?Y\xee\xe4\x12\r2\xca\xbfG\xa6qD\x0f\xa9\xeb?E\xd0\x9a\x8b\xcf\xb8\xc1\xbf\'o\xb0\x9b\x9e\xc3\xfb?\xb0\x13[N\xc0\xaf\xba\xbf\xc3DB\xfe\xca=\xf2?\x0f]0\x01\x11\xa4\xb4?U \x9d\x1az\xe4\xe6?\x96 ^\x17\x9f\r\xb5?\xb4\xfdm\xbdAs\xe6?\xdbiX\xd2<\xd6\xc9\xbf/41M\x9bV\xfa?m@\x8f\xa6\xa4\xd5\xb0?\x1b\x9d,\xc1s\xc8\xf7?\xae\xef\x9f8\x08F\x81\xbf\xcehq"\xcfC\xaf?*\x1e\x94\n\xda\xa5\xb9\xbf\xe7j\xc0\xb9P \xf8?\xcc_\x82?e~\xb2?}\x07\x16\xcb}\xfe\xff?\xbb-\xeb#(\xcf\xa3\xbf\xf2\xcb\x9e;\xd0\x82\xf1?\xb8+/\xe50\x9d\xc9\xbf\xf2\xfa^\xe0SH\xfe?y\xdc\x0b`\x9f\xd1\xa5?d\xe4\xdf#BH\xec?{w\xe8X\xaf\xfe\xc1\xbf#\'\xa9\xa2\xf0\x05\xf1?\x94#;\xc3\x03\x80\xf4?\x1f\x9ebH)Y\xef?(\x99\xd1A<X\xa4?\x94\x91\xe6=\xac~\xf5?\xd8\x9d\xd4\xfb\x1f\xb1\xb4\xbf\xc1\xc0_d"k\xf2?\xe4\xa2Mp\xe1\xc2.@\xd7\xa0a8\xf1Y*\xc0\x88\x99\xca\xb5o\x86\xad\xbf\xdf\xc9\xf3\x8b\xae\xe3\xe3?\xf7\xcc\xe6\x88_\x7f\xfd?\xf6U\r\x84\xe9V\x03@\x11\xb9\xbe^3O\xa9?\xf0\x87\xfeI\xf1a\xef?u\x80H\xd6\xb1\xb2\xac\xbfi\xde\xa3\xdf\xd7\xe0\xf6?M\xd8\x9e\xbd\xea\xba\xc6\xbf\x88ASS\r{\xf6?\x91\xd9z\xd17\x08\xe7?VYye\xe5\x1f\xfc?\xb4BMK\xc7\x98\xb1\xbf/\x84\x02\x9e\xb3\xa5\xed?\xb4H~\xea\x8b\x95\xd0\xbfO\x03\x9aC\x95p\xf9?U,3i%\x8c\xe7?\x9d)&FW"\xf4?k\xbd;\xf3{n\xc6\xbf\x98M\xb4\xe5!\xcf\xf0?A\x80\xcd\x84\xd6&\xe3\xbf)"\xc6\xc9\xc0\x82\x06@Z\xf1\xea\x8aS@\xd4\xbf\x0e\xaa\xc91r\x9d\x01@h]\x8b\x1dC\xa9\xd2\xbf\xdf\xd8\xac\xb0d\xba\xfb?\x1eQ\xa3N~"\x93?Kq\x0e\xea\x17\xf9\xf5?\x06\xebFz\x1a\xaa\xed\xbf%N\xb4\xb78\xe3\x0b@c\xd0\xe3\xf8x\x17\xc6?\t\xe2\x07\xf2[d\xeb?\xd5\x9f\xe8\xfc\x1e\x0c\xa4?\x85\xd3\xe4>\xcc\xf9\xf8?N\x06@n\xd2~\xc6\xbf\xb4C\xe3\xc9\xee\xa2\xfa?\x0f\xe0c\xf6\xbd\x18\xba\xbf\x02#\x8d\xe4\xbe>\xe7?\xb4#Tp\xc6e\xc4\xbf\x0f\x1b\xa1\x9e)0\xf9?\xaa\x96Y\xb0\xe8\xe6u\xbf\x98\xfat\xd3\x9a>\xf2? \xf6\xfaK\xee\x84\x00@i\x89\xcd\xe9\xa7r\xe3\xbf&\xc3W\xe9\x85\x7f\xed?y\xda\x8d\x88\xa4W\x0b@\xd8\x85T\xac\xac\xba\xf1?7p[\xf4\xd9\xee\xe7?^q\xa8)\x12\xcc\xdd?*\x12\xc8\xb0\x0b\x96\t@@\xfcX\x9c~\xdb\xa6?/\xb8\xe15+\xdc\xe4?\xd9\x81\xf9\xc1\x89\n\x9e\xbf\xc0\xb3\x9b\xca\xf0l\x05@\x8fM8U\x1d\x15\xa6\xbf\xb1\xffq\xdd\xde\x9e\xc8?\x1b\x15yl\x9b2\x93\xbf\xae-\xf6#\xeb\x07\xf6?Pa\xa4\xec\xaa\x88\xa4\xbfp\xf2:\x16=\xc4\xe6?\xb7\xc2\xb4\x89V\x12\xc0\xbfT\xccA\xcf\xfe\xea\xee?\xa97\xc6\xf1\xd6H\xa6\xbfOH1I\xde\xb5\xf2?\x0c\xf6\xe4y\xb9\xa1\xd1?c\x9c\x88\xa0\x1a\xc7\xf8?\x9e\xdb\x90l\xa7\x86\xa0\xbf=U\x8auX1\xf4?\xa6\xec\x82\x9c\x1d\xc0\xc8?\xa3)\xbfW\x1d\x1d\xfb?\xae\x1b\xe2R\xc8\x17\xb3?\xcbBK\x8d\xa9\xd6\xf1?\xef\xcf\x1c\x98\x15\x95z?(\x89\xb4(\xed\x07\xf4?}\x1co\x02L\x11\xb1\xbfq~\xf3c2\x15\xec?Y\x8a\x1c.\xfd\x8a\xad\xbf$\xf1\xff\x1byP\xe6?\xbc\xaa/(8}\xa1?\x83\x82\xf3y.\xab\xed?\x9f\xd7>/\x88C\xeb?cOW\x91M!\xd7?'
p148
tp149
bag2
(g3
(I0
tp150
g5
tp151
Rp152
(I1
(I2
I357
tp153
g12
I01
S'%\xefX\tv!\xbf\xbf\xbe\xf0\xc75\x00h\xf5?8i\xab\x8b3\\\xa4\xbfr\xae\x19WN\t\xf0?=\xf3\x08T\xecO\xa2?\xa0\xe3r>`2\xf6?\x8a\xb5\x08X\xc7<\xbb\xbf\xd6X\xf5\xb4\xfa@\xf8?!\xe4K\x990\xb8\x91\xbf\x183=|\xf8\x96\xf7?\xb5\xe85\xb6\xe0\x8d\xb3\xbf\x8d\xb1\xda\x13\xad\x95\xf4?\xfd\xc0,wJ\xe3\xcc\xbf\xe2\\\xc5\xf7\xb7:\xec?\x19G\xc4{\x00\xe2\x90\xbf\xf2\xab\xd5\x88w7\xe4?\xc9\xda\x9a\x02\x1bl\x93?\xbbI\x17\x95\xe42\xf2?\x07\x8a\x007\xf5\xeb\x88?\x87\xf8\xc1\xcc\xa8\xd6\xf7?[\x07\x83%\x97\xee\xdb\xbf\xd6*\xde\xf9,\x07\x11@A\xba~\x16`\xb7\xdd?\xacc\n]\x85\xde\xe4?\x0b\xb7\x00\xea\x88\x83\x91\xbf\x93\xc7\x10{\x1d\xa4\xf3?\xe5p\x16&z\xf9\xce\xbf\x99\xdd\xf2\xa3\xd3\xff\xf2?\x14%\x15\xd0\xd0~\x8e\xbfh4\xc1K\xe5$\xf6?2\xa4\xc9\x80\x97\xa4\x95\xbf\xdd\x87\x92\x0e[e\xf6?\x94?\xfas\xdc?\xbd?x\xc6\xa6\xf9.t\xf0?Lu(\xf1?D\xa8\xbf\x9f6\xcb/g\xd7\xf1?o\'\xcad\xab\xb7\xdd?\xcce,\xa75\x1c\xf7?\xa2\xbd&+;\xf2\xea\xbfTx\xa0v\x8b\xd5\x1a@\xac\x99\xe7j\xcc\x92\xbc\xbf\xf0\xa1\x8a\xfc\xf7\xbb\xf2?@\xe0\x9c\x82\x7f\xbe\x9a\xbf\xcfG\xa6\x00I\x0f\xf0?-\x06\xe0\x1f\x01\xc0\xc3?r\xf8}\x05\x03\xb7\xee?`O\xb2\x91\x86\xf6\xb1\xbf\x15\x19\xdb$\x8d\xb1\xf6?\x8a\xa6PF\xa1\xea\xb7?\x15\x0e`\x9a\x9ea\xe9?\x931T/G(\x0c@E\x1b\xa0\x00\x9a\x91\x0f@\xcb71\xca\xe7\xf3\xaa\xbf\x18\x0e\xdal\xd3i\xf7?\x10\x83h\xcf\xd8\xcb\xad\xbf&`!\x9b\x907\xd1?\xac\xdd\xba\x10-\x91\xcf\xbf\x93\xc7\x1b\xad\xb3\xdf\xfc?\x93w\xbe\x1eM5r\xbfw\x01\r\xb3\'I\r@\xf4\xf4>\'\xa0M\xb0?\xf0\x89Cj!\x1a\xf1?\xff\x9f\x13\x00r|\xbb?\x8aC\xf8^\xc2\xb3\xe4?O\xb7f0\x95J\xe7\xbfbJ\xb8\xad\x07\x9d\x14@\x83\xe9C\xc6>h\xf6?k[\x8c/{\xf4\xf3?\x10\xe6\x1bN"\x03\xe9\xbf+\x80\xff\xe9\x0b\xdf\x19@\x80\xf7@9\x9a3\xc2\xbf\xca\xb6\xc2\x02\xe6\xb4\xf4?\x15\xc5\xb8\xd5\xa6\xbd\xb3\xbf\x11l\x9e\x8f4\xf1\xf1?\x9f[\xde\x84$U\xaa?\xea6B\xd1\\I\xec?\x13\x82\x86\xce\xe5=\xdb?\x9a%6\xb1+X\xce?\x8a\x1fH7\x18\xf3\xa1?\xa2\x1f\xa6x\xab\xb2\xed?\x8b\x95\x15\x19\x12]\xa0?\xc0\x1dn\x115\r\xd2?\xd5\xe7\xa3\xdd=7\xa5?\x97o[4\xacZ\xff?\xe9\xa5\xdc\xe3\x8b\xc5\xbc?\x84\xb24Iyp\xe5?\x18\xc2\x9d,J\xbc\xb8\xbf#\xdc\r\xb6\x8d\xba\xf9?!\rW\x15\xc8\xb1r?Pb\xe9\xb9\xe0\x88\xf4?=v\xfaLL\xee\xdc\xbf\xebO\x0b\x97to\x0c@\xc4\x99\x11\xdfqU\xd0\xbf\xb9=\x0e\xc5v\x1e\x0b@\xb7\x9f\xaf\xa4F\x84\xa4\xbf\x87\xac\x88\x9e\xfd\xb4\xd2?\x8eM\xa0\xe5\xc7\x13\xcd\xbf\x89\x9cS\xedC\x10\x01@4\\\xa90\x86\x15\xb6\xbf\xfc\xff\x9dE\xbc\xd0\xe9?o\xd8\xfb\r\xea\xa2\xaf\xbf\x03\xcc1|+\x03\xf4?\x84\xcb+\xa7\x19m\x95\xbf\x0c\x96qv\xeb|\xe6?yX\xa0\xb8\xb8W\xa0?\xf1\xc6\xdb\x93\xb5\xc9\x00@Kj\xe4\xb5\xaa\xb7\x81?G\xccc)t?\xf1?\x87k)\xae\xfeR\xbd?\xa8k\xf3\xf2\xf2\x19\xe7?\xa6\xaf\xf8\xa8\x1b\x92\xcd?9q\xdeN\r*\xd5?\xc7f\x04\xea%\x91\xf1?\x18\x8b\xe3\xd1\x95\xc1\xe0?\xdft\xd2_\xf8\xc1\xba\xbf:3\xf56\x84\x81\x02@\x8d\xda\x94g>\xe0g\xbfA\xe2QeE\xa2\xe5?\x04\xa9>>\x1b\xf0\xb3\xbf\xbbH\xca\xe7\xd4\xdb\xf3?q\xad\xb4A\xed\xde\x93\xbf\xe789\x8d\x7f\x18\xdf?wux\xe1k\xb2\xbd\xbfR\xeb\xf8\x9e\x9d\x8e\xf7?\x96\xbbm,\xb9\x06\xb7\xbf\xdf\x99@r\x90\x86\xe7?\xb6\x8eoK\xeb\x10\x8a\xbf\xb7\x97\xea\xe5R~\xff?\x8b\x8fl\x8f\xbeU\xc5\xbf\xc0\xd2\xcd<\xee\xd4\xf2?\xf0e\xb4\x08E\xb8\xc1\xbf\x81\xa5l\x06x\x97\xfc?\x06\x89\x06\xae\xbe\xe4\xd4?oc\x03YV\x18\xed?\xc2\x9b\xb7\xf6\xbb\xf5\xd0\xbf\x1ea\xf5\xc9\xd2\xa5\xfc?F\xcb\xd3v\xd8?\xc5?\xd3\x08\x929[\xd3\xe5?\x8d\x80\xe2\x15\xb0\xf5\xc8\xbfV\xc0\x85\xa4\xbfI\xf3?\xe8\x07\x9c\xca\x8a\x0f\xb4?m\xe65o\xf7k\xe9?.\xc7\xfd0\xfd\xb4\xa3?\x10e5\xb5\x11\xc5\xe9?e;8\xa3%M\xd1?\xaf\\6$\xcb\x16\xfb?\x07\xe9F\xf3\x13\xac\x8e?\x04s{\xe7\xcd\x1d\xeb?\x98v\xb5\'w\xed\xf5?\xb4[+\xdd\x07`\xe1?\xd61\x04\xe0\xf7\xe1\xc5\xbf\xca\x9f\xe0ZR\x8b\xfc?\x9c\xa80\x87b\xae\xaa\xbf.\x9cN`\x87\x00\xf6?v\x93Ku\xb3k\xa1\xbf\xeb\x0f\x15x\xa1\xc4\xe3?\xf1M\xf1R\x88\x08\x94\xbf\xa5\x8aa\xd3\xf4I\xf4?\xeaM\xee\\7h\xc7\xbfI\xafc\x19$\xaa\xf9?\xbf\x9f\x8e\x04\xc7?\xad\xbfc9\x17\xdb\x9c\x15\xe8?g\x7f\xc7\x00\xfd\xbd\xd2?\x90\xceI=\'6\x02@A\xbf,\xdf\x0eH\xbc?Bmb/\xe4"\xe8?\xdc\x17\x9e]\xf8\x7f\xda?h3\xa4\x0f\x089\xc9\xbf\xe1\x02\x19\xc5I*\x87\xbf\xae\xee!X}U\x00@4y@\xb78$\xb6?U\xaf+M\x05\xf9\xe8?\x91\xd2t\xbf;\xc9\xa1?\x1d<i\'Ab\xf2?$\x07\xcdG\x1e\xff\xc5\xbfm\xe4"c\x94T\x05@\xbd\xb6\x16\xb3\x86\xce\x1a@T=rk\xe7\x90\x00@i\x13-[\x82\x98\xc2?\x8c\xd4u\x16\xe1\xd9\x06@\x13\xf2\x93`X\xc2\xca?ubX,\x12\xdd\xed?K*\xe3\x18\x94W\t\xc0CD\xb0\xd9\x11f.@F\xc2\x12\x0f\x88\xff\xcd?\xb3\x15\\\xe57\x05\xe7?l\xee$(m\xbc\xc2?\xd4{#\xce\xb5#\xe6?U\xb6a\xffwu\xdc?\x01W\xf9N\xf5\xd9\xe8?\xfd\x99nQ\x943\xe3?]d\x8b\x04/\\\xf0?n\xd8R\xd9\x12\x86\xbe\xbf|\xce\xf8\xd3\x1a(\xf1?*\x0c7\xd1\xf6P\xfe?\xea\xa2\xde\r\x1e\xdf\xcd\xbf\xeb\xaf\xe6\x82\xeel\xa6?*\x0bY2\xca\xe7\xeb?\x882\x00\xef\xec\xdb\xb8\xbfL\x15MD}\x8d\x00@\xd8]\xa9I\xa2d\xb3?\x92\xabY\xee\x9b\xad\xec?\x00\xe4?\x0f&^\xc1\xbf\xd1y\xc4\x04\t\x84\xe9?{5C\xe9s\xbb\xc8?|\x1dI\x04\xe3!\xf1?m\xe4;\x02C\xb6\xd4?\x11y!H\xa9\x9c\xf7?_R\x8fq\xea\xcf\x9c\xbf*\xd3\xa7O\x01(\xee?\x1c\x05\xfb\x02\x8a\xf4\xb9?\x89s\xbc\xa1\x9c\x0e\x0c@sO\x18kZ\x07\xdb\xbf\xfe\xe3o\x0b\xf5\x97\x0b@"\x9b\x0f\xbd\x14\xbe\x86?1\x17\x11?\xabo\xe8?\t\t1\xd0N}\xca?H\xb6\xd7\x04n\xad\xe6?^\xe4\xbdW\x92\xa3\xa8\xbfc\x1d}\xd2\x96"\xf1?\x9e\xae\xbf\x89FM\xac\xbfn\x90\xb7\xbe\xda\x03\xf1??\xf82P\x87\xa7\xa8?S\x8c\xac\xcd\xca8\xdc?\x18`x\x88\x16\x00\xbf?f\xdf\xb7\xb3\x04\xf7\xe5?p\xa0\xbd\xc9\xfb\x9c\xb5?.\xb2\xc8#\xd4\x0f\xe5??\x8d\xfd\x84\xe0A\xbe\xbf\x94|*<\x91\xca\xfd?\x0c<q\xcb\xad\xbf\xbf\xbf&4\xc5\xa1Mb\xf9?\x13#\x9dp\xc8\xc1\xd0?\xcb\x80\xfa\xe7\xf3\xce\xf2?\x9b\xc4\xfce\xc2\xe4\xdf\xbf[\xbf\xe3*\xc9\x06\x03@\xe3\xb1\x98\xc5\xa0g\xb7\xbf\x8a\xaf\xad0\xeeO\xf5?\xf8\xa1\xf5\xe0\x84\x00\xce\xbf\xec\xfe\xab\xefk\x1e\xf7?\xcc\xdc\xb7z\r\x1b\xb7\xbf\xc6u\xfc\x19\x07\x0e\xe4?\x18\xae^\x9b\xd6\x92\xd4?j5\xacl\x08\xeb\xea?\xd7\xf1#\xde\xe75\xba?\x8e$\xcd`&\xdd\xf3?\x13$\xb6a\x10\xf4\xa7?+\x90\x90k\x1fj\xe8?A\x9bia4H\xc5?2\xd1?\x16Xr$@l\xf7\xefj\xdf\xb0\xe4?\x8c\xb7wu\x90\x1b\xe7?\xfb\\\xa70.;\xba\xbf\x07\xf1Y%\xe05\x17@E\x86F\xfe\xbdS\xe6?\x97\xe2\x0eRr\x00\xcf?\xb6:\x9c==\xb8\xad\xbf\xa68\x0f\xf5\xb2#\xf7?\xef\'4\xb6r\x8d\xb4\xbf\x84\x91\xdf\xf7\xe3z\xee?Y\xa8\xb1\xd7L\xf2\x99\xbf\x11\xbdb2\xc6\x06\xe1?\x00M\xbaB\xb0\xa7\x81?\xd3\x84\x8c\xd0$C\xf1?\xf8\x1eOZ\x8e\xe1\x95?\xe4wW\xd3\x1cs\xf1?5$\x95PUF\xc3?C.\xbe\xbd>\xc3\xea?\x13\xbb\x19\x0b\rF\xc5?r4)V\xa5\xec\xe5?rM\xff\x90\x1e<\xb4?\xdf%\xf0.\x8dT\xe1?\xbe$o\x14\xa2\xb2\xd0\xbff\xe1\xdaM\xac\xc0\xf9? \x88>\x19?\xf1\xb7\xbf\xec\xf9$VV\x1a\xe7?\x8cah\x818"\x8e?\xb0<\xa66-e\xf5?\n\xc1\xd3\x1e\xd2\xe4\xbf\xbf\x06\xcd\x08\xa6\xdf\xb4\x02@\x82i\x85*\x03\x06\xc8\xbf\x17\x92z.\x0e\xe1\xf9?\xa8%\x85\xea\x8c\t\xa3\xbf)}\'\xb3}h\xf5?\xed\x07\xc0\x91\\\x9cl\xbf\xd1;\x9a\xcc\xea\x8d\xed?\xa8\x98Z\x86\x96}\xbb\xbf\x800\xf7\xc6\x1b\xe0\xed?w\x99\x14J\xb9\x82\xc9\xbf\xef\xc5\xa2\xd5&\x17\xfc?\xa6\xeb*\n\xac|\xdf\xbfTx\x8d\x0e\xa1\x92\x07@\x14\x0bT\x0cN\xca\xfc?\xb8i\xfc~\x97\xf3\xe0\xbf\'+\xb6\xd3\xfeu\x95?2F\x1a\x8d\xa6\xf2\xf1?\xe8\x90\xd7\xcd}\x95\xd1?\xe8\xc6BaL\xd7\xec?\x86\x17\xf7YZ_\xbd\xbf5qZ\x1br\xe0\xf8?\xeb\xdcw:yX\xe3?\x8f\xc1\x90q\xf9\x80\xf6?X\xba\x1c\x90=\xfc\xc1\xbfa\xa1Nv\x16]\xf0?a\xc7\x04\xbd\xc7\xa0\xb4\xbfL\n\xef\xf0S\x8f\xee?\xcb\x92\x18Mx\xc0\xc8\xbfn\xdfk\xf1\xfc\x97\xf6?\x9d\xb8\x1br\x18\x9f\xc7?\x15\xe8T\xc7,\xf8\xba?\xe1l\x8f6X)\xd9?\xe3P\x0c\xa6TL\xe6?\x94^\x8b\xb2\x95T\xa1\xbf\xa1\x10\x8bs\xd4\xd5\xe0?(\xf8\xad^B\x8f\x9f?\xb8\xbf\x1c\xd5\xc8\xf6\xdf?\x8d\xa2T[(\x98 @DJ\xdc\x8d}`"@X\xec\x80\x08\xcd\x99\xb1\xbfu\x19/\xec\xb9\x16\xe3?9\xb2\xae\xeb\xccV\xc5?z\xf6\x9f\xfb7\x8e\xe8?\xf3\x87p\xc1\xaa\xce\xb3?hT\xdb\x9ef*\xf4?R\x13\xdb\xfb^f\xcc?\x98\'\xf2\x000\xa3\xdb?\x1b\xc0H\xad\xec\x10\xc8\xbf;\x8b\xe7\xa3\x1e\xea\xf7?\xeeQ\xf7\xfd\tZ\xbd?::\xf5%\xb2\xb1\xf0?\x04>\xac\xa7\x1a\xdf\xb3\xbf\xcb\xa6\x986_\x87\xef?I\x1a\xc6\x93\x91D\xa8?$\xa4\x85\xf0p\xfc\xf1?\xaf\x86\xbc@\x9a\xfc\xb0\xbf\xbe\x10\xc2\t\xfe\x8a\xf1?\x80$\x8d\x17C7\x92\xbfn\x1bCweb\xee?8\xd2c\x7f\xf3E\xb4?r\x10\x9fkuR\xee?lF\x0bI\xfa\xcb\x99\xbf\x93e\x02\xd8>|\xee?G:2\x85\t\xb8\xc9?\x91>\x10\xfdV\x8c\xf1?\x9a\r\xb9\xfe\x1a\xa8\xbb?4C\xe9\x06`R\xd9?z\xb4\xd5\x98\xa6{\xbc?\xc0t\xect\xa1\xcb\xed?Z\xbcV\xcd#\x00\xff?\x00\xcd\xdf\xca\x1e*\xe7?\xf5{*\xb3\x9f\xd3\xbf?\xeb\xd6\x8b\x88k\xfa\xf9?Z&\xa3\xd8\xb3\x95\xa4\xbf\x04[y\xc5}\xfc\xeb?X\xc2?\rP\x9f\xc2?Vy8B\x06Q\xf1?\x0b\x89\x8f\x0f\xd9\xee\xda?\xd6G0\xe5^R\xf1?\x91h\xab\x91\xd3\xa7\x90\xbf,\x91\xb7\xa7\x1a?\xec?\x07\x15\x9fV\x08F\xea?\xb4\x17o\xde`\xba\x9b?a\xa0\xbc\n\xf3\xa3\xe8?<\x9c\xb7\xc6\x05F\xea?M\xf0\xa9\xf3\x08\xf9\xd8?\xef\xa0\xe5\x00U\x98\x12@8\xa8\xf3#\xf1\xb5\xd0?\xbd]\xd5\xc1\xb0\xa3\xee?\tFau\xa6E\xc4\xbf\x88A\xb2\xd1\xd5\xc2\xe7?d\x04\xec\xdd\xb4]\xd3\xbf\xdf\x89\x9ccy`\x03@r\xe6\x0f\xda{q\x9b\xbf\x14\xdc\xd6\x90\x8c,\xea?ai\x03\xf6\xe6\xc2\xd0\xbf:K84\xfe8\x02@~Hd:\tW8@Hk\x14>\xcd\xf11\xc0\xbf\x11\x18\x85\xbdr\x9e\xbf\x94\xd3\x81tF/\xfc?\xca\xa7\xeam\xb1Q\x97?\'r\x87\x17?)\xe4?9d\x1e\xfbA\x06\t\xc01\xa1\r\xcc@\x13+@\x9b\xca\xddq\x1c?\xe3?ej\xb5S\xbf-\xec?\x0f@\xab>\x80\xed\xc9\xbf\xe96M;\x7f4\xf8?L\xa2!m<\x86\xf4\xbf\xf5`"\xf5~@\x16@\xf5\xf3\x97\xc3\xbb\xf0u?_h\xbd6\xf2\x06\xf0?\xc9%\xc00w\x15\xc6?\x82\x9c`K.\xfb\xde?\xb8\xab\t\x85w\x0ex?2\x87(\xba,\xba\xf3?;\xee\xad\xc7<\xa3\xd6?\xf6\xd0#\x8f\x14L\x0b@\xefU\xcd\x11`K\xaa\xbf\x13_C\xaeh\x18\xf4?\xaf\x160\x9b\xd9\x90\xb7\xbfV\xe6\x16;\xb2i\xe5?\xe3\xa6n\xcb\x87\t\xa5?\x86\xeb\x93\xb6QF\xf1?\xd8\xce\xcb$d>\xa5?w7\xeey\x82L\xf3?\xf9\xed?)\xfd\x83\xbe\xbf\xb7A\x16^\x11\x9f\xf5?\n\xa2r\x87,\xb1\xb8\xbfz\x9d\xad\xc11\xaf\xe8?\xabPE\xa7\x83f\xab?\xda\x94\xed\xe2G}\xf5?Ud\x11\xba\x87\x07\xa0?\xa9q\x17\xcc\xd7"\xdc?SY\xbcw\x97\xd8\x8b\xbfe\xf2\xaa\xde\xb5\xb5\xec?\xa1\xbf\x81Y\xc7y\xc7?\xe4q\x1aS\xd3\x8d\xe4?\x88\xc4\x08\x0fQ\xed\x01\xc01\x84\xa5j\xc2\x84"@\x12\xce\xf95\x97m\xc5\xbf\x17A\xb3Q\x9c\xad\xfb?\x86-\xc1\x84|\xd5\xe0\xbf\xc7A\xc1\xec\xc1C\x11@y\xc3Xu\x10V\xca?i\xb2\xe3\xbe\xb5\xf3\xe0?X\xd0\xaa\x82\x1b\xf6\xf5\xbf\xd8*\x89fn\x9a$@\x11\xe1b\xecN\xe0}\xbf\xcf\xccUj\xec\x0b\r@&1\x14R\x84\xa9\xbf?SC\x04\xc9\x8f\x8b\xf9?\xe2c\xa3?l\xbb\xc1?z\x03\xb9r@g\xe8?\x9b\xeb\xa5\xd2?\xa5\xb6\xbf\'%\x92\x06\x19k\xf1?C)\x19\x14\xb7,\xb0?\xf9\'\xfdu\xbfb\x00@.I\x00iR\xb7\xc8?wb\xde3J\xa7\xf7?\xfd\xc6\xe1\x10\x93\xb1\xa7?\xf9\xc9(t\xbc\x06\xf1?$\xb6\xa0b\x8ex\xc9?\x1d\x97]B\xb5\xfc\xef?\x94\xc5\xb2\x03\x14\x98\xb2\xbf\x18`\xcdH\\,\xf4?\xbc\x01\x05^\xac{\xaf\xbfEPM\xc0\xbep\xf8?g\x8f\tL\tB\xb2?#rJ\xb2]\xd5\xef?\xfc\xf9?\xc9\x02\t\xcb?j\xff\x06\xc2\x192\xf7?\xb2t7J\n2\xd1?\xad\x8dut\x98\x99\xfd?\xcb\xc6\xaf\x86DX\xb5\xbfi\xc2G4\xef\xc8\xe4?(\x0fk\xa4\xd8\xfa\xf0?\x8c\x87\xe20n\xa9\xe8?<n!#\\\xca\xf2?\xb5\xf0f\xa8\x83\x85\xf0?U\x97H\x95\x1ce\x8b\xbf\xa1~\xb1=x\xc7\xd6?\x9b\xe1\x13\xcb\x0er\xc9?8\x8a\xd6@\xa3\x99\xe7?y$\xd8\xf0\x97,\xa9?-R^<\xcc\r\xfe?\x16\xb0\x0b\x97\xc9\xdf\xb8\xbfr\x89\xdbZ\xdey\xf5?\xe3;\xea\x95\x17\x87\xbe?i\x01\xc8^\x7fb\xf0?\xe8\x18/\x80n\r\xb6\xbf\xdf\xd98Bv\x94\xe2?}\xe2\xfbG\xcb\xbc\xd3?\x15\xac\xd82\x17\xf0\xe4?\x96}B\xf6\xd0\'\xf4?pN$\xa4\xcd\xc7\x0c@\xd0S\x02\xf5I\xc0\xc7\xbfW\xd7:\xef\x9d)\xec?\xad\xe6\x92\xf2%\x1c\xdb?\xaeK\x14\xbc\xae-\xde?d\xe8\r\x14M\x83\xc4\xbfy+c0`I\xe9?<\xb8!\xddp\x81\xbc\xbf\x04%Dc\tw\xfc?\xf2\x86\x13KG\r\xd2?\x97nh\t\xa7O\xea?\xa6\xd1\x9e\xb6\x85\xc3\xb0?\x11\x9f\x05)\x0b\xc5\xea?l\xb2\x129\xbf\xf1\xb2?\xd0\xed\xb3q\xe7\x1e\xe5?\x05\x92.\xdc\x8e\xe3\xc2\xbf\xcb\x91\x83\xf6\x9e_\xf2?\x1bK\x90j,\x16\xc2?\xd4v@d\x9a\\\xd3?\xa3S\n\x92&\xa8\xbe?\xa6*\xdc\x0f\xd7\x99\xf2?\xa9\x9a\xe5<|<\xb3\xbf\x03\xa3\xda\xdd\xbd\x1f\xd0?\xa9~\x17\xcd\x0c\xd5T?k\xa7V\xc7\xd9\xcb\xef?\xdb\xa6\x9c\x9bW\xf0\xb3\xbf\x82?\x11\xf6\x04A\xef?^`f\r,\xd1r?\x9aj\x03\x9d\x87\x9b\x96?]n\x14q n\xc3\xbfu\x80\xee)\xf92\xf5?\xec\x81\xe8\x86f:\xa1?\xb7\\\xa3f\x0bu\xdc?\xce\xfe@\xd9f\xad\xd1\xbf\xb9\xbe\x11\xa2fD\xf7?\x96~[%\x12$\xb2\xbf\x04+\x0eU\x8c\xdd\xeb?\xb1c\x84\xd0\x10\xb2\xd1?\x8e\x86\xa3\x9c\xe11\xe5?\x9b\x1c\xc4\x95\x9f9\xb2\xbf\xf5\xb1\xe5\xd1\xf2\r\xf0?\xc8\xf5hJ\xc8}\xa1?\x81\xfe\x9f\xaal\xbf\xed?7j\xd7[\xa31\x9e\xbf\xdd/z\xa6\xbcY\xf3?\xd2\x1f7\x1d\xee\x15\xa6?^(Yf4\xee\xf4?\xf7\x8ec\x89o\xcb\x95\xbfRsA\x07rg\xe8?\x1a\x98\x02\x9e1\x89\x89\xbf\xf9\xc3\x82\x1dhR\xdb?l\x0c$\xc9\xb1A\xb8\xbf\x98\xd1i\xb8\xc8\x88\xf6?\xe1\xb6\x07\x01\xc6\x11\xa1?x*\x14$\x8b]\xf3?3D\x89\xa7u\x1a\xc3\xbf\xb0rD\x02\x9e\xaa\xf7?\xa9\xe4\x95m\x19\xbc\xa5\xbf\x04W\xa7\x85St\xe0?\xb1\x87\xfa\xec\x96\x8c\xb4\xbfG\xeb\xe1\xdb\xff:\xf4?0\xe9\xd3u\x9d/\xc5\xbf\xb2?\xf0\x1fG\xeb\xf9?\x98,\xad~\xcf\x95\x11@\xf9b\xd3\xf5\x10\x9a\xe6\xbfP\xb0\x11{\x99\xf6\x9e?.p\xb4\x85\x19\xf3\xdd?\xc0A\xd8\xa4\xe1\xba\xa9\xbf\xbc\x8f\xd1\r\x02\xc6\xf1?\x92\x1f\xe2\xa5]\'\xc4?^\xb6x]gN\xef?]9\xfb\x940o\xc1?\xcc\x07^\x8a\x96 \xf7?\xca\xf1\x05\x97b\x87\xcb?\xd4\x1d\xc2\xbb\x18?\xeb?uB\x18\x8c\xdcg\xba?\x87\xd3S\xaf\xfc)\xee?\x9e,\xdf\xc6!"\xd4\xbf%XE\xce\xfb\xfd\xfc?"\xfa*\xa2\xb3H\xb8\xbf\xedd\xd7\x86\xef\xa3\xf0?\xe4\xab\xbe ?\x9f\xa5\xbf,\x18\x1b\xccri\xf1?\x9f\xdcF\xed\xba\x11\x97\xbfR\x91\xee\xe1\xa0\x8d\xf7?\xaeG7\xbcR9\xd9\xbf\x14LS\xcc\xe5\xa8\x00@^0\x1f\xce\x81\x8e\xba\xbf8dv\xb1\x96\x03\xf7?C\x9a\xa7\xb6\xc8=\x99\xbf\x050R=\x88\x97\xef?\xd5U\xa3\x1a}\x14\xd3?1\x90E\x00\xcb?\xf0?\x98\xbe\x86\xae\xafS\xac\xbf\x93\xf7\x91\xa0\x14\r\xf2?\xba\xda\x0eG\xbcJ\xb8\xbf\xa0\x13\x01b\xf7w\xe6?z\xae\x95\xa4r\xaf\xb7\xbfa\x8d`\x16\xe5\xc4\xf1?#\xe2\xbb\xe4\xba7\xa9?\xc3\xe2KM\x83\x19\x02@M\xc38\xdd@\xc2\xa9?\xc9\xc8\xe1\x88\xbc\x08\xf7?\x1f\xc3\xe7\x8fW\r\xcd\xbfz\xa6\xb7\xe3\r\x9a\x04@\x1c\x8b\x81F\x95\xd4\xc5?N\xa2\x0f\x0e\x98\x86\xed?\xfc0\x86q\x9b\x13\xbc?\x17\xa4V\xff\xd1\xe8\xef?c,7 M\x08\xd0\xbf2\xeb\x18n\x07m\xf6?0\x98\x8dJ\xa4-\xc6?\xee\xb6n\xea\xb7\xe1\n@\xc7K\xb8\x8e\xfa\x88\xb1\xbf@f\xaa\xd5\x91g\xe0?\x86d\xa4rcD\xc8?}\xffsx[#\xea?\x0b\x83\xdb\x99\xa3\x84\xbb?\x87\xfd$\xd3h<\xe0?\xe3:\xdeI\xc2\xc0\xb4?\x00\x03j0\x00\x8a\xe9?_\x1f\x98U\x04\t\xd7\xbf\xbc\xd3P\xc1\xa1w\x00@\x10\xf7\xbea7\xe9\xab?m.\xce\t\x18\x85\xad?\xd7\x11<E\x17o\xd7\xbf\x9c\xcf\xf0\xe7\xab\xb3\x07@\x1e\xe5\x0b\xa9G"\x88\xbfO\xfc\x9d9\xd9\x88\xf0?E\x13[H_\x82\xb3\xbf\x17\xba\xfd\xf5\xd0o\xef?0n\xa9o\xa0-\x10\xc0{\xf6\xf0\x8f\x188;@\x11\xb8\x9b\x00z\xe9\xb3?\x9e\xd0\xf2\xea\xb3-\xea?\x13\x1f\xfa\xc3\x9b\xf4\xa4\xbf\xed\xb3\xf6\xab\xb1/\xf0?\xcdu\xdc\xfeXB\xb5\xbf\xdd;\xbf%\xc9\xf4\xea?\xd0\\Isp\x0e\xbc?\xe9\x82\xe4b6C\xf2?\xf2P\x82\xb8n\xcf\xa7\xbf\x08Q\xf9\xb9\xe8\xa1\xf2?\xaf=Ry\xd4\xf3\x96?\xeb\xab\x98O\n\xde\xf0?ye[\x8d\xce\x84\xc6\xbf\xb1\x9b\x9a\x8b\t\x1c\xf9?n\x8c%Qj\x85\x9a?\xf8&\xcd.\x11\x06\xf1?\x97tL#\xf9\xbf\x04\xc0j\xed\x97\xa2\xa4l*@\xb2K\xe1\xe6\x05=\xd3?\xbc\xf6\x14J\\z\xe8?\xee\x85Ko\x1b\x00\xd1?\x13\xf4\xe5\xdd\xda\xef\xe4?FTD\xba\x7f\x04\xc0\xbf;\xbe\x94O\xaa\x1e\xf7?\xd2\xf6\x16\xec\xe4j\x8d?\xdb@!\x19h\xec\xef?\x10\\Q\xe3\xd1];@\x12\x1d\xa1Z#\x838\xc0j?8\xe1\x0b\xf0O?\x9e\xeb\xe9q \x94\xee?\rw+v\xf0%\xd0?\xdf|\xbe\x1a\xa2\x8d\xeb?i\x89\xecc4\xe8\x93\xbfW\xb8\t\x15.\xf7\xe6?\xb9\xf2\x8f\x0e\xcf\x89\xa1?\x06$\x98\x13\x83\xf9\xe9?\x1bT\xfbngt\xc0\xbf\xfd$\xea\xa3~\xc5\xef?\xef\xa5#Y)~\xbe?\x02\xfd\x8e\x84r\x0e\xf6?\xe3\xaeU\x1d\xd2\x81\xc3\xbf\'\xb5\x1dN\x92\xd7\xf6?\xfa\xd5\x8d3\x93\x16\x8e?=\xb7\xc8 ]f\xf8?\xf5\xef.\xf4FG\xd9?xISg\x81\xae\xe2?!\xdaN+\xf1\xc6\x8e?\xd5\x9ecp\xa2\xaf\xf3?\x1e+&\x83SO\xb2\xbf\x9a\xc0\xf9\'\xac\x92\xf6?\x8c\xd8\xbcU\x1e\x92\xb2?\x06\xae\xd85L\x01\xf6?^\xb8u\xba\xf1w\xec?X$s\xf1t\xc0\xd3?0\xa6"\x82\xf3\xce\x89?\xf9B\x99i\xb8%\xf0?\x1bZ\x89\x183\x9d\xb6?^\rN\xa4U\xa9\xed?\xf1\xc1\x85\t\xd2\xfc\xb1?J!\xf9\xe2\xaf\x8e\xf1?\xf5\xeb\x00\x95\x1a\x97\xb2\xbf\x8emU*\x92\xfc\xec?\x17\xce\x1f\x8f9\x17\xc5\xbf\x9c\x05\xd7:\xca\x89\xf7?\x01\x02\x84\x9d\x97\n\xc9?\xa4\xb9\x05\xcc8\x16\xbf?Q\x06\x0eJI\xf6\xa1?\xe1jm\x15o\xab\xc5?\xd3\x81\xf2\x157\xa7\xb8\xbfx\xed\x84!\x0b\x8f\xe6?\xbaC\xd0\xec\xfd\x1b\xcb?n\x16\xb1go \x13@\xcck\xdb\x06\xf3p\xb0?\xf9\x06\x9e\x0fj\x1a\xd4?\xeb\xdasng!\xd2\xbf\xf8\x9cyPo\r\x06@\xee\xa2\xe0\x04_t\xc2\xbf\x08\x84\x12\xcb\x84\xae\xf4?\xd1\xd5\xa7\xf4dY\xc3?\x88\xd1\x95T\xd6"\x00@\x0c\xbe5C\xc5\xae\xd2?\x88F\x97\n\xb2\x8a\xf0?\xb4\x01QvmZ\xc3?gQ\xb9\x88A\xbb\xeb?L8M\xb0\x92\xcb\x87\xbfk.g\xdf8\x05\xf2?,\x08A\xdci\xf2\xc0\xbfX\xaf\x83\xc4\xad\xd1\xf1?\x16\xf3\xbd\xb0:Fa\xbf\xefm\x18\xb5\x86\xe6\xf4?\xff\xe1t\x89P\x1f\x9c\xbfU\xe5\xbe\xb7\x0e\x82\xf0? /\'\x07\x89\\\xb1\xbf\xd4\x9a4\xd7m\x16\xe8?\xc9\x7f\xada\xe8\t\xe8?\xf9\xbb\xff\xe1\xbf\xe2\x04@97=\xea_\xca\x90?\xcdC5\xa8\t\xcd\xfc?0\xf4N\xb7}\xd9\x97\xbf\xd9{y\xbaR\x1f\xf2?\x12U\tV\xfcw\xd3?u9DV\xcc\x87\xee?2\xcc\xb5\xc7\xf5\x98\xa8?\xce\xf6~t\xc9\x16\xe7?\xbb/9"*\x07s?T\x93]!,\x1e\xf4?'
p154
tp155
bag2
(g3
(I0
tp156
g5
tp157
Rp158
(I1
(I2
I326
tp159
g12
I01
S'\xe7K\xc0\x93\xc1\xe7\xbc?\xf0a-\x9e\xd1\xca\xd9?!\xf8#\xe9\x19\xbe\xc2?\xffTqt\x06\xa3\xed?c\x19?\x9b\xf4\x17\xd1?F\xef\xd3\x8c\x8ac\xfe?\x9c\x98\x886\x8c\xf6\xa1\xbfB\xc7y\x8c\x90G\xe3?b\x15\x05\x1c\x9c\xcb\xb6?\xc8\x0c{\x9b\xe4\xa9\xdf?\xf2\xab\xe3\x1bk\xe6\xa6?\x17\xf5u\x12b\x03\xea?\xe0\xde\xd3\xee\xa8~\xa5\xbf\xfa\xc4Uc\xbb@\x00@\xcd\x07\xae?\x1d7\x91\xbf\xd3\x0b\xeaz\x80\xa1\xf2?_\x13\x0ch\xc8w\xe4?\x0f\x99g\xc11P\xf2?\x94]\xadf"M\xd5?\x90\xfb\xfa\xdb;\x91\x10@\x8e\x1b\xe8l\xc0\nw\xbfE\x96\x98\xbb\x08i\xeb?V\xf9 {i\xc0\xc5?1\x1a\n\x97\nE\xeb?\xe3\xb8\x9byw\xbd\xc2\xbf\x0e\xcb\x8d- \xaa\xef?$IN\xfa\xeb\x03\xa2\xbfh\xfb.\x86gS\xe9?\x16a\xad\xcb\x1c\xac\xc3\xbf\xfb\x00\xc5\x11\xe9\x82\xf8?\xfe\xb9\x0e=F\xc1\xdc\xbf\x8c1*\xd4\xa9\xdb\x04@Z\x1d\xbc\x14\xfeS\xdd?~\x06P\xdd\xa47\xf1?\xd74\xa6]\x91{\xf2?=G\xdaI\xa0,\xe2?\xe83q\xfe\x01W\xb4?\x98\xe5_Fx|\xe3?\xbe\t\xc3\xc1eG\xa4?2\xb8\x9c\xadkm\xe5?S\xf9\xa0[i\x99\xc6?\x12\x97\xb5P\x92P\xdd?\x80\xbcU\x9c\xdc\x8d\x80\xbfE\xdf.\x85d6\xf8?x\xdc\x8a\x87&\xc4\xd7?lm\xbd\x878?\xf0?\xdc{\x82\xeb\xdal\xae?s\x07\x83:.C\xe0?*5\x9c\x1d\xd5Q\xce\xbf \xd0B\xb1\xa0W\xfa?\x1b\xc9`r\xd1p\xd1\xbf\xb1"\x88\xa3\xfe\xf2\xf5?\xb3p\xc2\x16Q\xc4\xc4?\xf3=\x05T\xab\x11\xfd?\xd0E\x8e\x0c\xa8~\xb2\xbf\x91\xa8\xc6Q\xde\xf7\xf6?eN\xa5\x83\xc0\xa4\xb6?{\xdf\x9a(\x8e\xe4\xe5?\xf5Z\x8b\xfbbM\xb8\xbf\x13\xe0Ee\x9aK\x02@\xa6@\x96\xa6\x8e\xc9\xd6?\r\x85\x13si\x1f\xee?\xc6+\xa8\xb3\r\xbb\xe9?>\x8a\xf3\x0cU\x93\xf6?\xabT\x9f\t\x1f\xb3\x11\xc0K\xd8}!\xee\xa75@9\x0e\xeb\xacL\x8f\xbe?CX\x0eZO\x06\xf2?\x15\xa7\xf5\x833c\xa2\xbf\xbbS\xc4\x9d\x0c\x8c\xf5?s\xbe\x07vK$\xb3?:\x83\x80\xa0\xf4B\xf6?\x85*Q\x9c*0\xa0?\x9b\xda\xfa\xd2B\x8b\xe7?\x87b\xef\xffq\x04\xd3\xbfE\x1c5\x03I$\x0c@a%\'$\x18\xee\xb9?\x9f\x9c\xd0\xc7u\xf5\xf4?F\xa1T\xed\xd0\x03\xaa?\xb5\x95?+\xc5#\x00@:\x1e\x18\x07B\xb4\xa9?h>nf\xb4y\xfb?\xaf\xce\xb9\xf6#E\xaf\xbf\xb5\x02\xd4b\xeb~\xf3?\xe5\xea--]\xc4\x92\xbf0.GEpA\x15@\x8e\xe6\xf0\xa82\xb4\xb8?>\xb1\xa3\xaf\x16\xf0\xe4?\x0c3\x9c\xd1\xe5\xfa\x83\xbf\xff\xef\xe5\x05Q.\xeb?\x10/\xdb\xe3\x81\xcd\xc7\xbf\xdd\xef\xab%\x10\x9d\xf7?\x81\x95\xd91\xc4G\xf5?\xc3Z-\'\xfd:\t@J\x07\x146\xfe \x9e?b\x80\x8fY\xe4\xcb\xf1?P\r\x7f"\x86+.\xc0\xe2\xc9\x0e_\x97)M@\xfe\xef\xf5U\x99\xe9\xca\xbfzj\xb7\xcb\\\xeb\xf3?\x88=`\xb5\xa5\xd5\xd4\xbf\xd4\x1eE\xd3\x9f\xf3\x12@\x00C\x86o"U$\xc0wj2\x9f\xe0\xbf@@(\t\x7fN\xd9-\xe6?\x92\xf3F\xfe\xa6<\xec?L.\xb9\xcb&\x81\xd2\xbf"\x19\xfaJkx\x01@/\x86\x80\r\x1b\xd2\xe1?B\x82\xf8\x864\xdf\xf1?\x0b\xded\xcf\xd7\xb3\xab\xbf]\xfe\xc4\xc7\xba\x18\xfa?\xa9,\x162\xac\x99\xca?~\x95\x9d]&r\xf1?[f6\xa9FG\xb5\xbf\x91\x1c&\x01\x85\xaf\xf3?\x0b\xc8wt\x10\xb6\xac?Lz\r\x08o\xed\xf2?\xd6#\xbc\xb9q\x1e\xb8?vrNX\x96\x92\xf0?\xa5#0|w\xb3i\xbf\x90\xcf\x18\xce\xfb4\xe4?\xbc\xbcd\xd9l\xdf\x92\xbf\x9d\xe0!q\xbe\x1e\xf2?\x06\x8c\xa9\xc9\xe7\x03\xdd?\x91j\x8f\xb5Q\x98\xf4?d\xf0lgq\x0e\xd6?K\xean\xb8\xdf\x91\x0e@\x8e\xb0\n*\xe6z\x9d\xbfu{0\xfb\xe2=\xf9?B\xa2\xe9\xd4\xb1\x1e\xd2?9f\xd8u,,\xf3?\x15\'\x1fr\xc2\xfe\xbc\xbf\xc4_\xc7\xdf\xa6\xff\xec?\x97kA1C\xe7\xe6?\x04\xba\xae\xea\x95}\xd6?\x90\x05\x07\xa4\x11\xad\xaf?\xb0\x1dJ\xd1V\xd4\xfb?\x82\x85\xf8\x8c\xec2\xbf\xbf=\x95\xc8\xf3F\x94\xf5?d\xc5\xcb$f\xa5\xcc?/($\xd3!!\xe6?\xce\x1dN>g\xd2\xe4?\x7f\x91|\xf0H$\xfc?\xfe>\xbaS\x83\xf7\xb8?\x90XHOtr\xe6?x!2\x8di\x86\xbb?d\x19G\xcc\xfdY\xfe?\xb7%>\xa7\x1c\x91\xce\xbf\x7f\xfaJ\xd6\x97"\x03@y\xa6\xff\x08r1\xc8\xbf(\x06\xaa\xfbK0\xf9?\xfd\xf5\x01\x1c\x9a\x9c\xb0\xbf\xff\nd\x03t5\xf0?f\xcf\xfe\x00\x99\x10\xb1?\x985\xec\x18L\xf0\xd5?O\x17\x8f\x8b2\xe3\xc5?\xa3a\xcb:\xcc$\xee?\x8f\x9b\x11\xb0\xfcq\xcf?^\xd3\xfc\xbc\xa4\xd9\xe1?!\x80s\xcb\xfb1!?\xc8\x1bI\x87\xfak\xe6?\x07d\xc5\xc21_\xde?l\xb2X\x03\x83\x84\xef?k\x1e\xff\xfe\xdaw\xec?M\xb2Y\xea\xbd\xc1\xf0?\x18+h\x95\xf2\xff\xc5?\xb7lL<\x92o\xfc?\xbeB\xf7\xed8\xfe\xf0?]Z$1\xd2\xf3\xfd?\xa1z\xf9u\xff\x83\xe3\xbf?\x00\n\xf5\xce\x8b\x07@Nt\xc7\x8c\x1c\xfe\xcf?\xe2\xde\xef\xd4\xcc8\xe8?8k\xc2[\xdbx\xc6?\x0f`]u%C\xee?\xbe\xd7\x11\x1e\xaa\x17\x91?\x16\xebg^<n\xf2?,\x96\x14\x83\xe4\x94\xaa?\xc4\xc2\xe5;S\xd0\xf4?\xbd\x1fr\xf1\xd0\xf8\xea?\x1d\x18j\x17\xf7\x12\xe1?:\x02\x11\x84\x90/\xae?\x11|h\x91\x07p\x00@\x19\xf0\xfbj\xcaI\xa6\xbf_\x01\xb0\xf83\xc5\xf3?\xa4\xd2\xc6\x0eP\x8e\xe6?n\xa2\xa5)\xd7}\xe6?|\x9e\x8e\x98s\xb1\x93?{\x9d\xdf\xdb\xb6\x82\xd1?}$\xd0\xb1=\xf5\x9e\xbfnj\x00\xe3\x82\x04\xf3?\xec\xa3\x00\x05e)\xe0\xbf\xd1f\xcb\xd54\xb8\n@\xaf\xf7\xc8?\xefy\xae?\x15\xb3\x7f\xb3\x7f9\xd2?\x90\x0f\xd9k\x9aq\xba\xbf\xf3"\x9c\xc185\xf1?"\xb7\xb1\xe2E\x85\xf4?*\xb1z\x95{C\xf4?\x14\xc3\tn\x1b\x99\x85?\xaf?\xd0\xe3\x0e\xfd\xf1?wv\xf0\xd4\\!\x8f?\x9d\x97\xe4\xfb\xbb\xb9\xf7?.\xeb\xd2\x80\xde\x8e\xa4\xbfh\x17\x8f\x98\x19Q\xec?\xf2\xb0\'w$l\xb2?\xc7\x98\xadHtH\xf6?\xbc\x0f\xc0\xa8\x1b\xa1\xfb?I\xc5\xbd\xffS\xd5\x0b@\xec\xdf\x8b\xee%J\x9b?\xce\xc5(#\x1a\x1e\xf4?6<s\x98\t\x01\xd7?m\x19\x9d\x16N\x0f\xce?{\xcd0(\x018\xb0\xbf\x83\xfbgi`m\xf1?Z\xea\xf1Ec}\xae?\xa8&\xc6\x8e\n\xf7\xe1?\xd9^q\xc2Xx\x93\xbf%\xdb4o\x05\xc8\xe8?\xa1A\x8at"$\xbf?zF\t\xd8\xcc\xd4\xac\xbf\x85h\x92\xdc\x13\t\xba?#gu\x949\xa6\xe7?\xa0\xc9F\xea,\xcd\xbe\xbf\xa0_\xb1\xa62\x8e\x0b@\xbe\x8f.\x8f*i\xd9?\xcf\x8d\xf3d\xc0\xe3\xd4?+R\xc9+\x1d\xcb\xe0?\xde^\xc9\xffz5\x19@\xaf\x92\xe3\x93\xf2\xfd\xe1?G\x05\x03\x0f\x97H\xf1?i\xb6hJK\xd8\x9a\xbf={\x91\xfb_U\xf8?\x1d\xe0\xff\x83\xe5\xb3\x01@\xd9s\x08B\x95\xd2\xf5\xbf\xf8b,\xd0\xa2b\xa6?\xc0\x9c\xec"\xf4*\xf3?2\xdb\xde\x89}\xb3\xd9?\xb3\x8c\xa9\xbe\xb9b\xc3?\xaf\xed]\x08\x0bA\xd0?\xd7\xc7\x19L\xae\x0b\xfc?\xf4\xc0\x9dCp\xdd\xa6?8\xe6\x0c\xec\x8d?\t@a$\xe9\x9et\xe9\xc7\xbf\x8c\xb4\x8b?%\xfb\xf1?BDnA\x8f\xc1\xf2? \xc5\xdb\xf0>6\xf3?\x99}b\xe2#\x03\xca?\xa2CbId$\xec?\x92\x86\x1c\x0cG.\xd8?ak\x07\xc7N\xf6\xee?\xdaG\x05Y%;\x1f@3\x0e\x9f\x96\xbfH\x1a\xc0U\xb9\x8e\xf1M\n\xc1\xbf\x88\xe8\x9bE\xefg\xf3?\x07\xa7\xe8\x07\xda\x8f\xcf?\xf2\xa8)\x85\xb4;\xf2?\xf5\x19\xe5+\xceG\xa4\xbf\xf1>\x88\x1c=d\xf5?\x1f\xa0qM[\xf6\xc5\xbf\xcctY\xc9\xe5\xa8\xf3?\x0b\xfdh\x167\x9c\xbb?Q\x9e2\xc8`U\xf4?\x97\xa9\xaf\x00\xcb8\x80?\xdda\xb2\xe7\xeb-\xf3?\x19\xfa\xc7\xef\xefY\xbd\xbf\x0b\x17\xbfR\x0f\x9a\xf1?\xea5s\x8f\x1c\'\x81\xbf\xfcm\xa7\x86a\x01\xf3?`\x7f\xe9\x9f~{\xec?\x02\xd0\xecfL\xbd\xe0?R\xe4\xf2)\xc7\xfc\xab\xbf\xf9\xc3\x19x\x94\x1a\xcd?\xc1\xd8\xc9\x9e\x98~\xba?\x94\xe2\t\x02\xf7\x93\x04@\x14\xff\x1d\xf3\xb2\xa3\xc6?\x90\xd7\xc8\x19\x96\xcf\xfc?\x12\xf9@\xcdK\xd3\xa8?\x12\xc5\xe7\x8e\x1a\xf4\xe3?\xffc\x11q\x90\x87\xd6?\xca\xaf\x03}\nU\xf1?\x9c\xc0-P\xd2]\xc7?\x1b\xcf\xdf~\x80\xf9\xf6?`\x14\xe1\xfdF\x08\xc3?5a\xce\xf6\xd2\xa2\xf1?C\x84\xee\xf0\xb5L\xa0\xbf\x1e:\x99\xf5\xd2\xdb\xee?\xca\x9dto\xf5\xcb\xd2?\xe2\xca\xef\'P\x16\xf2?D32\xe76\x83\xc2\xbfI\xc6I\xd1\x08v\xf4?\xa4\xe6|\xce\xd4\x87\x97\xbf\xf96g\x19\x86\xdf\xf5?>\xc5\xc9?0h\x9c\xbf\xb9\xbd\xfc\xeeM\xec\xe9?\xf5RBs\\Z\xd8?Wz\x8e)N\xc1\xeb?\xecz\xf8\xc3L\x86\xc5?gX\xd0\xa5\x9ex\xf3?2\xc9\xc4\x07\x82}\xb5?\xb1o\xedx\xfa]\x01@\xec\xcf\xbd\x9bbY\x99?\xbb\xd6H\x1f\x19\xc3\xef?\xfb_\x18\x97h\x11\xb8?{\xb6\x94\xe4~\x82\xed?0\xac^%R\xb7\xb5\xbfm\x85+\'\xb6d\xe3?fS\xf7[<{\xcb\xbf\xd1\xbf|S\x0f\x15\xf2?\x1f\xb6h\xd4\xd7\x1c\xc1?\xd817w\xd4\xc2\xe6?\xef\xa8{\x91[\xb0\x85?\x01\xea\x1d\xd2\xd6\xa5\xec?;\xa7\xb9\x10\xc9o\xa9?\x0b\x17\x1fO\xe4\x94\xfd?^\xa4\xc2\x14P<\xee?h\x01\xee\x17\x85\xc2\xef?\x95\x89\r\xf9S#\xc1\xbf<whDu\x99\xe9?\xcb\x98\xeb\xbd=\xf2\xcb?\x9d\x9a\xb0\xb4\xf2\x84\x02@\x1c`\xeaun\xca\x80?\x07\x0f\xf4\xf4\x00\x80\xea?\x16\x19\x1b8\x11Q\xba\xbfT\ne]L\x02\xf0?>\xa6\xf8\x18\x05\xfc\xbf\xbf\x18\xee\xcc\xa9\xae\xab\xff?\x8a\nz\xd5\xae\xf4\xa1\xbf\xc0\xa6\xa1\x1d\x0b\x13\xf7?7\x15rZ\xa7\xc6\x07@g\xee\x9e\r\xd4\xe2\x12@\xad\xc2S\xa7P\x1a\xaa\xbf\x0b\x16\\\r\xf2\xb4\xf9?{\x02v\x02\xec1\xa0?s\xe9\xaa)\x9f\x8d\xd2?XE<\xe1\xd7\x7f\xcc?\xb3D\xa8\x9b\xe2\xc6\xf3?A\x8e~fp\xf5B@\x0e\'m\x1a\xbb\xe0A\xc0Q^\x8d\xd6\x1e\x9a\xb5\xbfV\n+\x17fu\xf1?0E\xb9\xf7(l\xb7\xbf\xc8\x8f\x1c \xb6\x9f\xef?\x81\x01\x01~\x92\xf5\xc1\xbf\xd7nE\x10wb\x00@y\n0\xa4;E\x82?\x00\xd6/\x0c=A\xeb?*\xe15\xed\x12\xb4\xb8?\x1db\xa8X\x98C\xe0?\xb1\x92+\xa9\xb9\'\xc2?\xe4\x96c(\x9f\xd1\xf2?\x12B\x8c\x8b\xa1\xe9\x8d\xbf\x12KG\xaf\xe3]\xef?\x80w>#h\xf4\xb5\xbf\x98\x90\xe70_\x0e\xec?\xc5\x07\x99\xc7N\x8d\xba\xbf\xd9|\xdc\xf4[^\xfc?\t\xc6\xc6!\x90\x97\xa0\xbf\xfb\xb1\x94\xe61\xea\xfb?\xb4\x05\xbc\xf7\xcc\x87\xd5?Y\xcb\xac\xd2\xda\xe8\xe7?\xbd\x17\xdd\x1a\xedp\xa8?t\xa3c\xd0\xd0\xdb\xfb?6\xcf\xacERz\xa0?\x15\x80\x07\xbdal\xfa?hr\x81\x94\xe5\x83\xc4?\xc1\x86\x83\x95\x83\xa1\xe7?\xe2uT\xa2\x85X\xc1?F\xb5pp\x13G\xf6?\x08\x81\xfd\xaf)\x0f\xbc\xbf\xa9\xcc\r\xd6(9\xfc?]#\xa5\xe37j\xd2?\xa6\x98\x8b\xf2\x8a\x88\xf1?}\xd8\xa0\x10\xa8\xd0\xbd\xbf\t\xb0\xb4\xa2\xaaG\x04@X\xc7\xeaq\n5\xc6\xbf~Qc\xa1\x97e\xfa?\x17\x95\x1e\x03xF\xb8?nai`\xa9\x1d\xf0?\xff\xfc\xc3\xa6n\xdb\xa3?"\xc8k\xeb\xe23\xee?e*\x89\x17Gl\xaa\xbf\r9\xa9\xbfE\x84\xf1?\xdf\xbf`\xe9\x19D\x9b\xbf\x84\xdf\x19\x8a|\xff\xf2?\xcaAX\x93W\x17\xb6?\x8e\xc8\x97\x95y\xfb\xf3?,J\xac[\xa3\x8b\xb0\xbf\x9a\x81\x9aV\xfd\xc0\xd8?&0Oq)\x83\xa3?\xfa\xf0>\xeb\xa0\xf5\xd5?\x13\xb5M:Q\xda\xb8?\x92t cGr\xed?\xe8\x045\xa3\x91\x06\xb7?9l\xd6O\xcf\xd7\x04@F1J LQ\xc1\xbf\x1dl\xbc\xf6\xf7\x07\xff?\xc0\xd8\xaa\x16L\xcf\xa2\xbfk\xcd\x9e\xd4\xe7 \xe7?\x994\xd7\xdf\xa6C\x9f\xbf \xaa\x10\x1d\xad\xed\xdd?\x07\xd2-\xb2/\x80\xee\xbf\xf5\x8f\x11dU\x15\x11@\x14:\x80\xccQ<\x8c\xbf\xa3\x15\xd8\xb6\xecL\x00@HI*\x1b\x92\x12\xd7?\x8fF\x92\xe6\x0e\xb5\xf0?~p\x89\x80\x94\xf7\xa4\xbf\x9b\xdfK=\xe5\xd1\xf4?\x9ea\xe0\xec\x1a\x11\xd2?ua\x84\xa5\x1a\xac\xd2?\x0e\xd8\xac\t\x8e>\xb8\xbf\x8e\xf1N1\x02\t\xfa?\xdc\xa6\x1c\x81(\x9c\xea\xbf.\xc8;\xb6\x9c\xda\x13@\x15RB\xc0=g\xa7\xbfm\xff0Y(\xf2\xe2?\x08\xa9r\x82\xfe,\xd4?\xef\xa6c\x90\xe7-\xf0?\x1d\x87h\x88+\x85\xc5?p\x9f\xf9\x1eC.\xf2?j*\x15\x9a\xe9i.@\x84 \xdfo\xec S@t\x8b#\xce\x87q\xda?.V\xe3\x02vA\x07@[\x1f\x02\xa5\x1eU\xf4?\x90\xe9\xfb\x0fud\x10@f\x01\x9bi\xb0\xa2\x87?X/6\x9e^\xe8\xeb?d\xa8#\xfeM\r\xf7?mpU\x8b\x82g\xf0?.A\x1e\x9a\xbb\xdf\xb4\xbf_\x12A\r\x878\x10@\xc0\x97&\x97f\x91\xd7?D\xfeX\xde\x8e\xf9\xec?\x16\x14\xda\xd3/\x9d\x91\xbf\x86\x00\x11\xff\x0cW\xf5?kQ\xf1\xd6\xa8e\xc0\xbfX+\xbc\xbcM%\xe7?\x1c7)\x02\x16\xf5\xbb?\xd1\x87\x1a\x8d\xde\xf5\xe7?o\xdcN\xee\xdb\xce\xa6\xbf\xc2\x1c\xd5Ri\xec\xf0?\x18\xb4\xa7:uU\xc5\xbf,WA\xba\xc0\xe8\xf3?v;\xa9\x1co)\x83\xbf\x17\xc1\xc2\x98\xbc\xb2\xb9?\x0e\xa7t\xebz\xfdg?\x05z\x8d\x82`\x19\xe9?\xbf\xf6\x9f\x8eOC\xca?P\xfbO\xd4\xda\xac\xf3?\x88\xa9\xf9C4\x81\x81?\x1d0\xae\xa9a\xff\xd9?E\xcc\xbc\xa6\x99\xd3\xe9?b*\x94Oc$\xec?\x16\xc46\xce\xb5+\xbb\xbf\x8b\x99(\xdd\xca\xea\x07@\xe6\x1em\xea\xff\xa4\xc8?CY\xa5|\xaf\xf9\xf1?=\xd9_\x0c\x14\xdf\xb5?4H\xe7\x9e\x92y\x00@G\xca\xbfd6\xb0\x9f\xbf5\xe1\x1b\xed\xe5}\xf4?\xfe\xe5\x1a\xa4S\xec\xad\xbf-Q\x05\x94_}\xf1?i\x89"\x86\xfd\x1d\xa8\xbf-\x06\xb9&4\xb4\xf4?\xa5\x82\xa1\xda^`\xa8\xbf\xdc1\x80\xdad`\xf5?\x06a\xf0jl\x9fo?8\x08_\xe7\x06\x13\xf1?\xff\xc2_\x9f\x08\x8c\x9a?\x80\x8a\x90-\x19\t\xf9?\xff\x9dl\xf6\xbc\xd6\xd0?\x16q\xb6\x9c\xaal\xf5?\x8e\xf8\x16\xccg\x96\xb1\xbfX`\x91\x8f\xb8+\x03@\xe6(U\xfeR\x1f\xb6\xbf\xa4\xeb5\x17\xe3b\xf2?3\xef\x0bJ\x97\x94\xc0\xbf\xc9\x08\xb6\x08\x90\xc7\xf5?\xcaQ\xdd\xb3aU\x9b\xbf\x8e\xf6n\xc5C#\xfc?\xd1S\xcb\xc4T\x95k\xbf\x96t\xc5\x94=\x9f\xee?()\xc1\x85\x10{\xf2?\x06\x9e;-=l\xf5?,\x16\xdb\xb8\x8e\xd9\xdb?\xe8\xc4\xfc\x1a\x17 \xec?=1\xa9\xc6G\xf8\xb9?J\x05s\x9di\xf0\xee?\xf9;\x96\xb9b\xe6\xbc\xbfg\xa4\x1c\x8c\xa3\x1d\xfe?\x8a\xf8\xd8~\xe4\xb2\x92?i\x97r\xf0j-\xf8?\xb7\x89\x1d\x05\x04[\xd8?}\xaa\xdb\xc2\xa4\xe0\x08@E\x0e\xec\x89b\x1b\xcc\xbf\x14\x92\x12\x97\x9b~\x14@v\xf7\xe6Q\xc6\x0e\xb0\xbf\xf0Q\xddMZ\xb1\xf5?<\xfd\xe7\xcc\xd5c\xd4\xbf\x8e\x1aw\x8e\xcaf\xf6?\xdb\x92\xf3\x00\x0bT\xd3?\x84\x90\xbe\x8aKO\xda?\xf7\xec\xc8\x92(\xf2\xb2\xbf\xa0\xf5\xf3\xae\xca\x14\xfe?=\xf0\x80R\x8c\x0b\xb4?\xfai\xebD;\x0b\xea?\xb0)\xb5W\x1a\x00\xbd?\x100\x88\x14\xf2\xd8\xe7?\xf6W\x1a\xeeT\xd1\xa1?\x92\x1e\xeb\xde\x06\xfb\xea?\xfe2\x96$\x7f{\x99\xbfG\xb1\xffHD\x99\xf2?v\x15\'\r^\x18\xe3\xbf\xd7\xa3)\x1f\x19/\n@\xd2A\xdc\xf1\xc0\xc5\xc2\xbf\xcbu\xf5\xa9\x18>\xfd?\x9d\xc1\xf48RS\xc0?\xab1$8gS\xf9?\xe1|\xa1S\xb1>\xf5?v\xfb7D\xfb\xe2\xd7\xbf\xf9\xdc\x17\x90\xef\xae\xd4?k\x11\xa2\xbd\xd7\xa7\xfc?\x89Y*[<\xa4\xee?\xae\x16\x80N\xa4\x85\xf2?\xa8\x1bXf\xf23\xa4?YU\xf2C\xb3\x9c\xe7?\xdd|\x95\xfb\x92(\xb9?\x14\tr\xf2\x9d\xf7\xd4?\x11\xadh\x10\x8df\x12@|\xf7\t\xce\xdd\x17\xc4\xbf\x883\x80\xcf\xa1K\xc8?\xab\x7f\x062\xe1\xda\x08@\x97\xe6\xceE\xc5\x01\xe1?\x94\xee\xe2\xd2\xc6?\xf5?\xf3(\xeb\x88TFp?p1\x9f\x92\xddb\xf1?DU0\xb8\xc2\xf1\xb0\xbf=\xaf\xbb\\k\xab\x01@\x9e\xfa\x81\xaa\xf80\xb6\xbf\x82\xe2\xad\xd7E4\x13@$\x1fZ\xa1Y?\xb8?\xcc\xd8&L\x08a\xec?\xbf\xe6&\x92\x10\xa1\xac\xbfc\xc2\x86\x17\x034\xeb?\xb3c-\x82\xce-\xb6\xbf\t\xf4\x81\xdd\xbbf\xf4?\x04\xcf\t2\xbc\xeb\x9e?ZB\x84\x86\xf7\xd2\xf4?\x129d%~\xfa\xc0\xbf;"\xd0\xd4\x1b\xb5\xf1?o\xa4\x9e8\x05\xa8\xc1?\xe5\xa2\xce;b\xea\xf1?\x01-\xa2\x15\xe9\xac\xa0\xbf\x08\xf8\x8b\x86\xb4&\xed?}Iv%\xfe\x84\xad\xbf]\x1b\xa1\xc2\x84W\xf2?>\x8c\x94\xf9\xcb\xd2\xb0\xbf`\x89WO\xce\xb8\xfb?7\x00L\xa9\xa5^\xd1?\x06\x9e\x17l\x0f\xf6\xd3?\xe2\xbaE\\md\xb1\xbfz\xe1\x98\xf1]f\xd8?\xbeqK|\xba\x87\xd8?j\xda\x82\xcfl\xf8\x03@\xb7I\x02:8\x9e\x93?\x9bZF\x00@\x15\xf0?t\xb0\xe1\xd8\xf7\xac\xd2?\xa7^B\x13\xb6\x85\xe1?W\xacG<\x03_\xda\xbf\xe3\xef\x01\x02<\x0f\x01@\'\xe3$3\xa9U\xe3?\xc1\xb6\xa3\xeb\x1f\xfa\xef?\x82=\x1fY[T\xab\xbf*\xba2T\x19<\xf1?zf\x18\x1eZ\\\xe3?\x15\xf1\xa6:?\xde\xac\xbfk\xde\xad\xe8\x0f\xa0\xbb?\xd7G\xa0\x01\xae\xed\xe1?\xdb\x06\xf5\xf5\xcb=\x8e?=!~O\xce{\xd5?N\x02Tz\xcd\xd9\xc6\xbf\xb4?\x05X\x12\x0c\x03@s\xb0!\xe4\xd6L\xcf?<5\x9dy\xc2\xe6\xff?\xccH\xae\x91\x0b\x1d\xba?\xfc\xd1\xae\x84\x98\xd9\xf7?U\x01_\x8d\xa7q\xc8\xbf:m3\xea\x04}\x03@\xbc \xcc\xfcB\xcc\xe3?O\x07L\xc1\x03\xdd\xf1?\x0cf\x10\xef\xf6q\xc2?c\xc3\x06\xb3\xa2\x1b\xda?\x12\'il\xd6i\xe3?\x14X\xf8\xf6B4\xe8?\xd2\xa8;b\xc1\x00\xf1?\xebi\x15\xeai-\xc6?\xbf,\xc0\xaf\x1f\x0e,@\xa0h\xa9J\x07\x9c(\xc0jl\xee\x7f-s\xb4\xbfn\x11\x08\xa5\x1ee\xfa?\x04\xe7\xfb\xee\x10U\xf2?\x1d\xea\xbb\xfeK\xde\xef?\xe0\xb2\xa2\x99\x92d\x86\xbfr\x05\x99\x9b\xd6z\xe5?\xf9`\xda\x11\x8e\xa6k?3\xf6\xad\xdb n\xe8?\x97\xbe\xd8\xcez;\xc1?\x1cs\xe6\xd5\xe9\x0c\xe2?\x8c#\xea<t$v\xbf\xec\xcey\x05\xa9]\xdc?\xe7\xae\xc05\xb3\xa0\xec?q\xa6\xbd\x9bl%\xe7?\x87\xb2lg\x99\xc3\xcb?\x93$v\x1e\x8c\xeb\xea?\xf1\x02</\xf9\x81\xc5?cM\x0c\xfao>\xe8?\x06\x02\xbb\xf5\xa8\x17\xc1\xbf_(:\xda\xa6\xb3\x04@\x93\xc1\xc6\xadJ\xcf\xa0?#]\x98\x0cS\xc7\xf1?\x01T~\xe6\xa2S\xde\xbf\x86\'>2o\xc8\x05@\xaa\xfa\x9c\x121\xce\xcb?\xe2\xcc\xbb\xfat.\xfb?M\x19\xdb\xad\xca&\xc0\xbf\x0b\x85\xdek\xd6\x89\xea?\x90\xd9\xc8\x9d\x9f|\x7f?y\x9b\xe0\xb9\xbb\x82\xe3?\xfa\xdb\xa7,u\x96\xc1?2M\xbe\xd2\x83\x1f\xf2?\xcd\x8b\x84\xc8\x03\xe3\xc0\xbf\xd3S\x17\\&(\xf5?\xcd\xf1\x9bP\x83\xed\x9b\xbf\xfa\x1f]\x16\xa5\xee\xe4?\xb3\xfe\x8d\x80\x19\xe9\xd3?.e\xda\xcb\xe6\xc5\xea?\xa6\xbf)z\xa8|\xd8?\xd9kzy\xd3Y\xf4?\x89e{\x11\xe5\x95\x84?\xddQP\xc3\x97\xda\xfa?\xa4\x0fA\\\xe9\xb7\xa1\xbf\xe9R2\x01\xdb\xff\xe8?T\xb5\xf2Bb\xdd\xdb?&\xea\xbd\xa0\xe3\x97\xef?\x12\xd0\xe9\xbe\x03\r\xe2?\x10P\xbcF<\x15\x02@\x9e\x15j\x0c\x0b\x1b\xd0\xbf\x89\xcb%}F\xb1\xf0?'
p160
tp161
bag2
(g3
(I0
tp162
g5
tp163
Rp164
(I1
(I2
I107
tp165
g12
I01
S'\xb4q\xc9\x0e\x8b\x0b\xd4?1@@\xd4@A\xe7?J-\xdeu\x1e!\x84\xbf\x98\xcf\x13\xac\xbc*\xd9?~2#\xab\xb9\'\xe5?\x83\x9d\xb6\x13\xfe9\t@\xb7\xdd\xdax\x18\xd5\xcc\xbf\xb0\xa9v\x0f$%\x00@\xdb\x8c\x0e\xcc~E\xae\xbf\x8a\xaa\x81\x00y\xb2\xec?\xbe=\xba\xabm!\xd4?\xbc\xc6\x96\xd0**\xeb?\xfekd\x02\xf2\x0b\xf8?\xca\xd7\x91m\x1bY\xf5?\xff\x89\xe2\x16Md\x0c@@\x19\xfa\xeb\x03\xaa\x04\xc0\xf5\x03\xaf\x96x\x13\xea?\xe3\n\x9e?\xe9A\xe4?\x8b\xd6\x93\x03\x82\xed\xc1\xbf\xbc8U\xb02\xb1\xf6?\xb9\x18}\xf3\xc4\x1a\xaa?\xfa\x03I\xcb\xc3\xfc\xdd?a\xe1\x14\x16\xdf\xdf\xd1?\x9fR\x9ac\xc3\xc9\xe4?dW\x06\xd7k8\xe7?\xd3\x04z;c\xc0\xd5?\x08H3{\xae\xd5\xd1?\xd6\x1e\x98\xc9A\xd1\xfc?4E\xff\xb6^O\xd2\xbf0T\x08\x90\xeb\xc1\xf1?\xf2\x0e\xeb\xa6\x1b\x99\x0f@\xe2}\x16\x18u\x06\x00\xc0\xe0[Rsyp\xec?1a\xbc_b\xc2\xeb?e\xc5\x1c\xb0\xb8\xc3\x98?\x08M\xe5\x11\xe4\xf5\xe6?\xe9\x02\xe0G%\x91\xcd?Rz\xa1\xb0\xe3l\xf4?\xcd\x19UX\xf7\x96\xd1?K,\xf5\xae[i\xdf?\xf2\xe6 \x02\xf7\x10\xc9?\xc0\xb9\x9fb\xa0/\xf2?W\x0b\x14\n\xf2\xd6\x99?\xda)9a\xb53t\xbc\xdb\x82\x9c!\x1fN\xb7?\xb5\xa4Ve\x98U\xf0?\xfc\x10\x18\xe2a\xee\xb5?7\x1b\xec)\xc8\xa2\xf0?]$\x8aK\xfa\x96\x93?v\x0e\xa4,\x95\x06\xe1?\xa5\xa83\xb9q\x8f\xd0?\x0b\xf6\x98\x10V\xab\xf7?r\xfe~\xe8\xa9Kh\xbf3\xe1v\xa3n\x9a\xf2?\xab\x08c\x11\x82\n\xbf?\x03PoH\xee\xbc\xa2?\xb6)\xad2=\x1d\xb4\xbf\xa3\xa1\xc7?\xbe\xc6\xf2?\xcf\xa5\xfa~r\x04\x9d\xbf\xb4\x18|\xd7>#\xe9?\x9a)\x11\xdbJ\x15\xf1?\xb1\x9av_1\xde\xf7?\xde\xc5-!H\xdf\xb4?\xdbJx\xd7c\xe2\xf1?H\xab\x10\xc1\xf3Z\xd6?\x92\xf4\xedQ\x99\xf3\xf4?`\xb9\x1cE\\\xc6.@\x0cy\xb7\xf4\x0e:\xfa\xbf"\xf51\xf2\xf0m\xb8\xbf\xb8\xd9Lh\xc85\xe8?\x94\x8c\x11b\xf6\xd4\xb1?\x96\xd5_\xc0\x03\x16\xe4?\x18\xdd\x8e+u(\xda\xbfCp\x92b\xd1c\xf8?\xdb\xbf\x04A\xfd\xce\xd0?W\xb7\x14\x03R\xc6\xf6?\x96\xe5\xc6s4\xc8\xa1?\xb2\xd38~\xbeM\xc2?=\x95\x03\xd9\xdaO\x8a?\x95\x00T\xa1\x85\x9a\xe8?\xc7\xdf\x99\xc9\x16h\x1e@-\xc1`\xa4 a\x14\xc0{M\'\xce\xb3\xda\xd3?\x89\xad\x1f\xc7\x19\x05\xf0?\xf7\tGf\xa0\x12\xb7\xbf\xce\xb0\xd3r\x1c\xf1\xec?\x91\xcc\x8e\xfb\x07,\xa3\xbf\xeb%\xe6\xd3\x93\xfb\xf6?\x87g\x11+7X\xad\xbf]\x1c\xb1\x84n\xb8\xe0?o\xb0D*G\x0b\xcd??\xf3Zi\x97#\xf4?\x08\xf3\x92(#\x99\xca?\xa7{?$\xf9\x1c\xba?\xae\xf08\xcb\xc7\xd7\xc2\xbf\x7f$\x9c\xf7\xb09\xfc?\xb5\x91\xe6z0\x11\xc6?\xc3\xfc\xcc\x9d\x84f\xf3?\xd4\xb4\ts\n=\x99\xbfg\x10-\xb0\x1c&\xe3??\x15v`P\x82\xb3\xbfd\xba\xad\xd7\xdad\xf1?\xca^\xea\x02l\xf7\x82\xbf\n\xc3G\xc7uq\xe5?\xd0A\xe0\xc1a\xeb\xfb?\xd5\xe0\xa5\xd0N\xf1V@\r\xc9\x02*\xf3A\xbd?\xdbJ4\xdc\x84\x9f\xe9?\xd4J\r\xfd\x03K\xd5\xbf\xac\xffY\xf9\x8b1\n@B\xb0d\xc5/\x1a\x87\xbf\x82\\l\x17\xf7\xa8\xe1?\xb7\xcf\xb91\xbdZ\x93?\xbe\x9a\xa6\xe0\x17\x93\xf0?3\xd7\x06\x15\xce\xdb\x12@\xfc\xed\xb7\xb5\xf4\xc2\xf5?d\xda\x0ez"\xd9\xc2?\xbd\x1d\x85\xb9\xe7U\xfe?\xcc\xbd\xc7\xb3b\xc4\x96\xbfyt\xb4\xe1c\xb1\xf3?\x8e\x8a\xfa$_v\xba\xbfJ1\x02W\xdb|\xe2?=.cD\xf8\xd4\xc6\xbf\xb2\x9a\xac\xb0\xc6s\x08@\x03\xe0\xf8H\xf2-\xf2?\xbb\x9f\x18\xe1\x0f\xb2\xc9?|\xde\x86?\xc5\xa2\xa2\xbf\xe0\xe1\xe4\xe5&!\x00@\xd6\x8c\n8l=\xd8\xbf\x89\xc2VCW\x07\xf9?\xa3\xbd9+\x17[\xea?E\x1f\xb4\x12\x18\xfb\x93?\xaat8;LJR@yW\'\xbc\xd5\x13R\xc0*\xb9\xd6j\xed\xc8\xe2?\xd9\xd8lY+\xa5\xed?\xff\x0e)\xc4\xd0\xe6\xf2?\xa4o\xecO\x8c%\xb8\xbf\xff\x04r\xa7\x92\xd2\xc4\xbf\xc8\xe0\xa1\xde\x97\xa6\r@s\xbb\xfe\x9bZ\xd3\x16@\x10\x97o\x1d\xdc\xf7\xf6?D\xa6\x8d\xdfyF\xc9\xbf\x0e<\x8a,\x00)\xf3?\xeb\t\xd6\n\xe1\xcf\x0b\xc0c \xd9Tov)@\xba(\xdaF\xbfV\xb9?\x8b\xceE\x90\xc1\xb6\xe0?\x16i\r\x99\x7f\x16\x85?\x89\x88y\xca\x04f\xcd?Tz_\xae~\x8c\xcc?#\x18\xa0<hT\xf7?\x8e\xa1o\xb7LT\x9d?\xd3`\xff\xb4xx\xdd?\x1f\xcc\xb61\xf1l\xc5?\x81\x0c]\x8209\xeb?\xca\xf4\xb7\x8b\x03\xcf\xb0\xbf\x81\xec\xfd\x9ey\x8b\xda?"4\xfa\x92\xbf\x08\xbb?\x86+\x03~\xfdR\xf1?\xf0\x98\xdcy\x859\xbb\xbfsK\xb8!\xa6\xd3\xf6?\x88\x05\xe8\x13\rkK@\xbd\x11\x05Z\x8e\xa0J\xc0R\xd4W\\\x9fe\xbc?n\xaa\xcb\xcfE}\xfd?^\xf16\xba\x7f@\xc6?\xa6\xee\xe0\xa6\x9a\xf5\xe8?\xed\xffa\t\xfc\xfa\x82?8*\xfa\xd4\xc9\xcc\xe5?i_n\xbb\xd4\xe8\xb6\xbf\x030\x86\xc7\xac\xb9\xe5?\xda\x9e\xa4\xbbIb\xc9\xbfC\x9bW`X\xb9\xf0?:\xd0\xdf\xc8,\xba\xd0\xbf8S\x98\x8e\x9f\xb4\xfc?\r\'4\xf8.\xc4\xc8\xbf\xfd\x8d\x12\xaf\xa2Q\x12@5\x99-\xcb\x15s\xa9?\xe0\xcc\xd3\xc4\xbfO\xf5?\x9fTc]\xc9|\xcc?\xf3\xdc"\xd2\xc1\x1a\xb9\xbf\xa8f}\x89\x9b\xc4\xbd?y\xb6\xb8\x9e"Q\xea?e\x18\xc9\xd4\xba7\xb9\xbf+LN\xa3\xd8F\xff?\xe0\'D\x9fL\x1b\xe2?IfO\x1dc\xbf\xfb?\xa8\xd3\xb5t\x82\x8f\x01@\xbd\xa7i4\xc8\\\xf3?\xfe\xd96\x9b/N\xeb?\xa4\x01\xe6\x06\xae.\x16@`5\xbc\xb0\xda=\x9d\xbft\xcb>\xe8\x8e\x10\xe7?\x06\xd8\xa2SQ\xc3\xa4?4\x9c\xdaY\xa2^\xfd?\xb1\xe1\x12X{\x0b\xb7\xbf~\xa6\xfdJ\xdeV\x0b@\xd2xp\xbe\x0b\xd8\xe9\xbf\xaeB\x1c\xd7\xcd\xe8\x16@\x08\xc6;P\x05:\xe3?\x88\x17\xebFwf\xe0?"\xf2a\x1c<*C?\x86\x18[\t\x08l\xef?\x15\x0c\xf6\x8d>\x08\xc3?~\xbd\xc1\x02\xa03\xf5?[\x8a\x06\x021\xaa\x98?\xc6\xa4\xc0H\xd5{\xe9?\xa9o\x1d{\x99\xeb\xab?w!N\xf5v*\xf2?\xa5x\x0fQ\xe9\x15\xc2\xbf^\x07\x96A\x1c\xbf\xf9?\xfb\xfb#U\x93\x06\xd0?F\xc2\xe8\x01\xfc\n\xf4?'
p166
tp167
baa(lp168
g2
(g3
(I0
tp169
g5
tp170
Rp171
(I1
(I2
I64
tp172
g12
I01
S'\xc4\xfcC\xc9\xe0j\x98\xbc\xfc\xff\xff\xff\xff\xff\xef?\xc4\xfcC\xc9\xe0j\x98\xbc\xfc\xff\xff\xff\xff\xff\xef?\xc4\xfcC\xc9\xe0j\x98\xbc\xfc\xff\xff\xff\xff\xff\xef?\xc4\xfcC\xc9\xe0j\x98\xbc\xfc\xff\xff\xff\xff\xff\xef?\xc4\xfcC\xc9\xe0j\x98\xbc\xfc\xff\xff\xff\xff\xff\xef?\xc4\xfcC\xc9\xe0j\x98\xbc\xfc\xff\xff\xff\xff\xff\xef?\xc4\xfcC\xc9\xe0j\x98\xbc\xfc\xff\xff\xff\xff\xff\xef?\xc4\xfcC\xc9\xe0j\x98\xbc\xfc\xff\xff\xff\xff\xff\xef?\xc4\xfcC\xc9\xe0j\x98\xbc\xfc\xff\xff\xff\xff\xff\xef?\xc4\xfcC\xc9\xe0j\x98\xbc\xfc\xff\xff\xff\xff\xff\xef?\xc4\xfcC\xc9\xe0j\x98\xbc\xfc\xff\xff\xff\xff\xff\xef?\xc4\xfcC\xc9\xe0j\x98\xbc\xfc\xff\xff\xff\xff\xff\xef?\xc4\xfcC\xc9\xe0j\x98\xbc\xfc\xff\xff\xff\xff\xff\xef?\xc4\xfcC\xc9\xe0j\x98\xbc\xfc\xff\xff\xff\xff\xff\xef?\xc4\xfcC\xc9\xe0j\x98\xbc\xfc\xff\xff\xff\xff\xff\xef?\xc4\xfcC\xc9\xe0j\x98\xbc\xfc\xff\xff\xff\xff\xff\xef?\xc4\xfcC\xc9\xe0j\x98\xbc\xfc\xff\xff\xff\xff\xff\xef?\xc4\xfcC\xc9\xe0j\x98\xbc\xfc\xff\xff\xff\xff\xff\xef?\xc4\xfcC\xc9\xe0j\x98\xbc\xfc\xff\xff\xff\xff\xff\xef?\xc4\xfcC\xc9\xe0j\x98\xbc\xfc\xff\xff\xff\xff\xff\xef?\xc4\xfcC\xc9\xe0j\x98\xbc\xfc\xff\xff\xff\xff\xff\xef?\xc4\xfcC\xc9\xe0j\x98\xbc\xfc\xff\xff\xff\xff\xff\xef?\xc4\xfcC\xc9\xe0j\x98\xbc\xfc\xff\xff\xff\xff\xff\xef?\xc4\xfcC\xc9\xe0j\x98\xbc\xfc\xff\xff\xff\xff\xff\xef?\xc4\xfcC\xc9\xe0j\x98\xbc\xfc\xff\xff\xff\xff\xff\xef?\xc4\xfcC\xc9\xe0j\x98\xbc\xfc\xff\xff\xff\xff\xff\xef?\xc4\xfcC\xc9\xe0j\x98\xbc\xfc\xff\xff\xff\xff\xff\xef?\xc4\xfcC\xc9\xe0j\x98\xbc\xfc\xff\xff\xff\xff\xff\xef?\xc4\xfcC\xc9\xe0j\x98\xbc\xfc\xff\xff\xff\xff\xff\xef?\xc4\xfcC\xc9\xe0j\x98\xbc\xfc\xff\xff\xff\xff\xff\xef?\xc4\xfcC\xc9\xe0j\x98\xbc\xfc\xff\xff\xff\xff\xff\xef?\xc4\xfcC\xc9\xe0j\x98\xbc\xfc\xff\xff\xff\xff\xff\xef?\xc4\xfcC\xc9\xe0j\x98\xbc\xfc\xff\xff\xff\xff\xff\xef?\xc4\xfcC\xc9\xe0j\x98\xbc\xfc\xff\xff\xff\xff\xff\xef?\xc4\xfcC\xc9\xe0j\x98\xbc\xfc\xff\xff\xff\xff\xff\xef?\xc4\xfcC\xc9\xe0j\x98\xbc\xfc\xff\xff\xff\xff\xff\xef?\xc4\xfcC\xc9\xe0j\x98\xbc\xfc\xff\xff\xff\xff\xff\xef?\xc4\xfcC\xc9\xe0j\x98\xbc\xfc\xff\xff\xff\xff\xff\xef?\xc4\xfcC\xc9\xe0j\x98\xbc\xfc\xff\xff\xff\xff\xff\xef?\xc4\xfcC\xc9\xe0j\x98\xbc\xfc\xff\xff\xff\xff\xff\xef?\xc4\xfcC\xc9\xe0j\x98\xbc\xfc\xff\xff\xff\xff\xff\xef?\xc4\xfcC\xc9\xe0j\x98\xbc\xfc\xff\xff\xff\xff\xff\xef?\xc4\xfcC\xc9\xe0j\x98\xbc\xfc\xff\xff\xff\xff\xff\xef?\xc4\xfcC\xc9\xe0j\x98\xbc\xfc\xff\xff\xff\xff\xff\xef?\xc4\xfcC\xc9\xe0j\x98\xbc\xfc\xff\xff\xff\xff\xff\xef?\xc4\xfcC\xc9\xe0j\x98\xbc\xfc\xff\xff\xff\xff\xff\xef?\xc4\xfcC\xc9\xe0j\x98\xbc\xfc\xff\xff\xff\xff\xff\xef?\xc4\xfcC\xc9\xe0j\x98\xbc\xfc\xff\xff\xff\xff\xff\xef?\xc4\xfcC\xc9\xe0j\x98\xbc\xfc\xff\xff\xff\xff\xff\xef?\xc4\xfcC\xc9\xe0j\x98\xbc\xfc\xff\xff\xff\xff\xff\xef?\xc4\xfcC\xc9\xe0j\x98\xbc\xfc\xff\xff\xff\xff\xff\xef?\xc4\xfcC\xc9\xe0j\x98\xbc\xfc\xff\xff\xff\xff\xff\xef?\xc4\xfcC\xc9\xe0j\x98\xbc\xfc\xff\xff\xff\xff\xff\xef?\xc4\xfcC\xc9\xe0j\x98\xbc\xfc\xff\xff\xff\xff\xff\xef?\xc4\xfcC\xc9\xe0j\x98\xbc\xfc\xff\xff\xff\xff\xff\xef?\xc4\xfcC\xc9\xe0j\x98\xbc\xfc\xff\xff\xff\xff\xff\xef?\xc4\xfcC\xc9\xe0j\x98\xbc\xfc\xff\xff\xff\xff\xff\xef?\xc4\xfcC\xc9\xe0j\x98\xbc\xfc\xff\xff\xff\xff\xff\xef?\xc4\xfcC\xc9\xe0j\x98\xbc\xfc\xff\xff\xff\xff\xff\xef?\xc4\xfcC\xc9\xe0j\x98\xbc\xfc\xff\xff\xff\xff\xff\xef?\xc4\xfcC\xc9\xe0j\x98\xbc\xfc\xff\xff\xff\xff\xff\xef?\xc4\xfcC\xc9\xe0j\x98\xbc\xfc\xff\xff\xff\xff\xff\xef?\xc4\xfcC\xc9\xe0j\x98\xbc\xfc\xff\xff\xff\xff\xff\xef?\xc4\xfcC\xc9\xe0j\x98\xbc\xfc\xff\xff\xff\xff\xff\xef?'
p173
tp174
bag2
(g3
(I0
tp175
g5
tp176
Rp177
(I1
(I2
I64
tp178
g12
I01
S'\xc4\xfcC\xc9\xe0j\x98\xbc\xfc\xff\xff\xff\xff\xff\xef?\xc4\xfcC\xc9\xe0j\x98\xbc\xfc\xff\xff\xff\xff\xff\xef?\xc4\xfcC\xc9\xe0j\x98\xbc\xfc\xff\xff\xff\xff\xff\xef?\xc4\xfcC\xc9\xe0j\x98\xbc\xfc\xff\xff\xff\xff\xff\xef?\xc4\xfcC\xc9\xe0j\x98\xbc\xfc\xff\xff\xff\xff\xff\xef?\xc4\xfcC\xc9\xe0j\x98\xbc\xfc\xff\xff\xff\xff\xff\xef?\xc4\xfcC\xc9\xe0j\x98\xbc\xfc\xff\xff\xff\xff\xff\xef?\xc4\xfcC\xc9\xe0j\x98\xbc\xfc\xff\xff\xff\xff\xff\xef?\xc4\xfcC\xc9\xe0j\x98\xbc\xfc\xff\xff\xff\xff\xff\xef?\xc4\xfcC\xc9\xe0j\x98\xbc\xfc\xff\xff\xff\xff\xff\xef?\xc4\xfcC\xc9\xe0j\x98\xbc\xfc\xff\xff\xff\xff\xff\xef?\xc4\xfcC\xc9\xe0j\x98\xbc\xfc\xff\xff\xff\xff\xff\xef?\xc4\xfcC\xc9\xe0j\x98\xbc\xfc\xff\xff\xff\xff\xff\xef?\xc4\xfcC\xc9\xe0j\x98\xbc\xfc\xff\xff\xff\xff\xff\xef?\xc4\xfcC\xc9\xe0j\x98\xbc\xfc\xff\xff\xff\xff\xff\xef?\xc4\xfcC\xc9\xe0j\x98\xbc\xfc\xff\xff\xff\xff\xff\xef?\xc4\xfcC\xc9\xe0j\x98\xbc\xfc\xff\xff\xff\xff\xff\xef?\xc4\xfcC\xc9\xe0j\x98\xbc\xfc\xff\xff\xff\xff\xff\xef?\xc4\xfcC\xc9\xe0j\x98\xbc\xfc\xff\xff\xff\xff\xff\xef?\xc4\xfcC\xc9\xe0j\x98\xbc\xfc\xff\xff\xff\xff\xff\xef?\xc4\xfcC\xc9\xe0j\x98\xbc\xfc\xff\xff\xff\xff\xff\xef?\xc4\xfcC\xc9\xe0j\x98\xbc\xfc\xff\xff\xff\xff\xff\xef?\xc4\xfcC\xc9\xe0j\x98\xbc\xfc\xff\xff\xff\xff\xff\xef?\xc4\xfcC\xc9\xe0j\x98\xbc\xfc\xff\xff\xff\xff\xff\xef?\xc4\xfcC\xc9\xe0j\x98\xbc\xfc\xff\xff\xff\xff\xff\xef?\xc4\xfcC\xc9\xe0j\x98\xbc\xfc\xff\xff\xff\xff\xff\xef?\xc4\xfcC\xc9\xe0j\x98\xbc\xfc\xff\xff\xff\xff\xff\xef?\xc4\xfcC\xc9\xe0j\x98\xbc\xfc\xff\xff\xff\xff\xff\xef?\xc4\xfcC\xc9\xe0j\x98\xbc\xfc\xff\xff\xff\xff\xff\xef?\xc4\xfcC\xc9\xe0j\x98\xbc\xfc\xff\xff\xff\xff\xff\xef?\xc4\xfcC\xc9\xe0j\x98\xbc\xfc\xff\xff\xff\xff\xff\xef?\xc4\xfcC\xc9\xe0j\x98\xbc\xfc\xff\xff\xff\xff\xff\xef?\xc4\xfcC\xc9\xe0j\x98\xbc\xfc\xff\xff\xff\xff\xff\xef?\xc4\xfcC\xc9\xe0j\x98\xbc\xfc\xff\xff\xff\xff\xff\xef?\xc4\xfcC\xc9\xe0j\x98\xbc\xfc\xff\xff\xff\xff\xff\xef?\xc4\xfcC\xc9\xe0j\x98\xbc\xfc\xff\xff\xff\xff\xff\xef?\xc4\xfcC\xc9\xe0j\x98\xbc\xfc\xff\xff\xff\xff\xff\xef?\xc4\xfcC\xc9\xe0j\x98\xbc\xfc\xff\xff\xff\xff\xff\xef?\xc4\xfcC\xc9\xe0j\x98\xbc\xfc\xff\xff\xff\xff\xff\xef?\xc4\xfcC\xc9\xe0j\x98\xbc\xfc\xff\xff\xff\xff\xff\xef?\xc4\xfcC\xc9\xe0j\x98\xbc\xfc\xff\xff\xff\xff\xff\xef?\xc4\xfcC\xc9\xe0j\x98\xbc\xfc\xff\xff\xff\xff\xff\xef?\xc4\xfcC\xc9\xe0j\x98\xbc\xfc\xff\xff\xff\xff\xff\xef?\xc4\xfcC\xc9\xe0j\x98\xbc\xfc\xff\xff\xff\xff\xff\xef?\xc4\xfcC\xc9\xe0j\x98\xbc\xfc\xff\xff\xff\xff\xff\xef?\xc4\xfcC\xc9\xe0j\x98\xbc\xfc\xff\xff\xff\xff\xff\xef?\xc4\xfcC\xc9\xe0j\x98\xbc\xfc\xff\xff\xff\xff\xff\xef?\xc4\xfcC\xc9\xe0j\x98\xbc\xfc\xff\xff\xff\xff\xff\xef?\xc4\xfcC\xc9\xe0j\x98\xbc\xfc\xff\xff\xff\xff\xff\xef?\xc4\xfcC\xc9\xe0j\x98\xbc\xfc\xff\xff\xff\xff\xff\xef?\xc4\xfcC\xc9\xe0j\x98\xbc\xfc\xff\xff\xff\xff\xff\xef?\xc4\xfcC\xc9\xe0j\x98\xbc\xfc\xff\xff\xff\xff\xff\xef?\xc4\xfcC\xc9\xe0j\x98\xbc\xfc\xff\xff\xff\xff\xff\xef?\xc4\xfcC\xc9\xe0j\x98\xbc\xfc\xff\xff\xff\xff\xff\xef?\xc4\xfcC\xc9\xe0j\x98\xbc\xfc\xff\xff\xff\xff\xff\xef?\xc4\xfcC\xc9\xe0j\x98\xbc\xfc\xff\xff\xff\xff\xff\xef?\xc4\xfcC\xc9\xe0j\x98\xbc\xfc\xff\xff\xff\xff\xff\xef?\xc4\xfcC\xc9\xe0j\x98\xbc\xfc\xff\xff\xff\xff\xff\xef?\xc4\xfcC\xc9\xe0j\x98\xbc\xfc\xff\xff\xff\xff\xff\xef?\xc4\xfcC\xc9\xe0j\x98\xbc\xfc\xff\xff\xff\xff\xff\xef?\xc4\xfcC\xc9\xe0j\x98\xbc\xfc\xff\xff\xff\xff\xff\xef?\xc4\xfcC\xc9\xe0j\x98\xbc\xfc\xff\xff\xff\xff\xff\xef?\xc4\xfcC\xc9\xe0j\x98\xbc\xfc\xff\xff\xff\xff\xff\xef?\xc4\xfcC\xc9\xe0j\x98\xbc\xfc\xff\xff\xff\xff\xff\xef?'
p179
tp180
bag2
(g3
(I0
tp181
g5
tp182
Rp183
(I1
(I2
I128
tp184
g12
I01
S'\xc4\xfcC\xc9\xe0j\x98\xbc\xfc\xff\xff\xff\xff\xff\xef?\xc4\xfcC\xc9\xe0j\x98\xbc\xfc\xff\xff\xff\xff\xff\xef?\xc4\xfcC\xc9\xe0j\x98\xbc\xfc\xff\xff\xff\xff\xff\xef?\xc4\xfcC\xc9\xe0j\x98\xbc\xfc\xff\xff\xff\xff\xff\xef?\xc4\xfcC\xc9\xe0j\x98\xbc\xfc\xff\xff\xff\xff\xff\xef?\xc4\xfcC\xc9\xe0j\x98\xbc\xfc\xff\xff\xff\xff\xff\xef?\xc4\xfcC\xc9\xe0j\x98\xbc\xfc\xff\xff\xff\xff\xff\xef?\xc4\xfcC\xc9\xe0j\x98\xbc\xfc\xff\xff\xff\xff\xff\xef?\xc4\xfcC\xc9\xe0j\x98\xbc\xfc\xff\xff\xff\xff\xff\xef?\xc4\xfcC\xc9\xe0j\x98\xbc\xfc\xff\xff\xff\xff\xff\xef?\xc4\xfcC\xc9\xe0j\x98\xbc\xfc\xff\xff\xff\xff\xff\xef?\xc4\xfcC\xc9\xe0j\x98\xbc\xfc\xff\xff\xff\xff\xff\xef?\xc4\xfcC\xc9\xe0j\x98\xbc\xfc\xff\xff\xff\xff\xff\xef?\xc4\xfcC\xc9\xe0j\x98\xbc\xfc\xff\xff\xff\xff\xff\xef?\xc4\xfcC\xc9\xe0j\x98\xbc\xfc\xff\xff\xff\xff\xff\xef?\xc4\xfcC\xc9\xe0j\x98\xbc\xfc\xff\xff\xff\xff\xff\xef?\xc4\xfcC\xc9\xe0j\x98\xbc\xfc\xff\xff\xff\xff\xff\xef?\xc4\xfcC\xc9\xe0j\x98\xbc\xfc\xff\xff\xff\xff\xff\xef?\xc4\xfcC\xc9\xe0j\x98\xbc\xfc\xff\xff\xff\xff\xff\xef?\xc4\xfcC\xc9\xe0j\x98\xbc\xfc\xff\xff\xff\xff\xff\xef?\xc4\xfcC\xc9\xe0j\x98\xbc\xfc\xff\xff\xff\xff\xff\xef?\xc4\xfcC\xc9\xe0j\x98\xbc\xfc\xff\xff\xff\xff\xff\xef?\xc4\xfcC\xc9\xe0j\x98\xbc\xfc\xff\xff\xff\xff\xff\xef?\xc4\xfcC\xc9\xe0j\x98\xbc\xfc\xff\xff\xff\xff\xff\xef?\xc4\xfcC\xc9\xe0j\x98\xbc\xfc\xff\xff\xff\xff\xff\xef?\xc4\xfcC\xc9\xe0j\x98\xbc\xfc\xff\xff\xff\xff\xff\xef?\xc4\xfcC\xc9\xe0j\x98\xbc\xfc\xff\xff\xff\xff\xff\xef?\xc4\xfcC\xc9\xe0j\x98\xbc\xfc\xff\xff\xff\xff\xff\xef?\xc4\xfcC\xc9\xe0j\x98\xbc\xfc\xff\xff\xff\xff\xff\xef?\xc4\xfcC\xc9\xe0j\x98\xbc\xfc\xff\xff\xff\xff\xff\xef?\xc4\xfcC\xc9\xe0j\x98\xbc\xfc\xff\xff\xff\xff\xff\xef?\xc4\xfcC\xc9\xe0j\x98\xbc\xfc\xff\xff\xff\xff\xff\xef?\xc4\xfcC\xc9\xe0j\x98\xbc\xfc\xff\xff\xff\xff\xff\xef?\xc4\xfcC\xc9\xe0j\x98\xbc\xfc\xff\xff\xff\xff\xff\xef?\xc4\xfcC\xc9\xe0j\x98\xbc\xfc\xff\xff\xff\xff\xff\xef?\xc4\xfcC\xc9\xe0j\x98\xbc\xfc\xff\xff\xff\xff\xff\xef?\xc4\xfcC\xc9\xe0j\x98\xbc\xfc\xff\xff\xff\xff\xff\xef?\xc4\xfcC\xc9\xe0j\x98\xbc\xfc\xff\xff\xff\xff\xff\xef?\xc4\xfcC\xc9\xe0j\x98\xbc\xfc\xff\xff\xff\xff\xff\xef?\xc4\xfcC\xc9\xe0j\x98\xbc\xfc\xff\xff\xff\xff\xff\xef?\xc4\xfcC\xc9\xe0j\x98\xbc\xfc\xff\xff\xff\xff\xff\xef?\xc4\xfcC\xc9\xe0j\x98\xbc\xfc\xff\xff\xff\xff\xff\xef?\xc4\xfcC\xc9\xe0j\x98\xbc\xfc\xff\xff\xff\xff\xff\xef?\xc4\xfcC\xc9\xe0j\x98\xbc\xfc\xff\xff\xff\xff\xff\xef?\xc4\xfcC\xc9\xe0j\x98\xbc\xfc\xff\xff\xff\xff\xff\xef?\xc4\xfcC\xc9\xe0j\x98\xbc\xfc\xff\xff\xff\xff\xff\xef?\xc4\xfcC\xc9\xe0j\x98\xbc\xfc\xff\xff\xff\xff\xff\xef?\xc4\xfcC\xc9\xe0j\x98\xbc\xfc\xff\xff\xff\xff\xff\xef?\xc4\xfcC\xc9\xe0j\x98\xbc\xfc\xff\xff\xff\xff\xff\xef?\xc4\xfcC\xc9\xe0j\x98\xbc\xfc\xff\xff\xff\xff\xff\xef?\xc4\xfcC\xc9\xe0j\x98\xbc\xfc\xff\xff\xff\xff\xff\xef?\xc4\xfcC\xc9\xe0j\x98\xbc\xfc\xff\xff\xff\xff\xff\xef?\xc4\xfcC\xc9\xe0j\x98\xbc\xfc\xff\xff\xff\xff\xff\xef?\xc4\xfcC\xc9\xe0j\x98\xbc\xfc\xff\xff\xff\xff\xff\xef?\xc4\xfcC\xc9\xe0j\x98\xbc\xfc\xff\xff\xff\xff\xff\xef?\xc4\xfcC\xc9\xe0j\x98\xbc\xfc\xff\xff\xff\xff\xff\xef?\xc4\xfcC\xc9\xe0j\x98\xbc\xfc\xff\xff\xff\xff\xff\xef?\xc4\xfcC\xc9\xe0j\x98\xbc\xfc\xff\xff\xff\xff\xff\xef?\xc4\xfcC\xc9\xe0j\x98\xbc\xfc\xff\xff\xff\xff\xff\xef?\xc4\xfcC\xc9\xe0j\x98\xbc\xfc\xff\xff\xff\xff\xff\xef?\xc4\xfcC\xc9\xe0j\x98\xbc\xfc\xff\xff\xff\xff\xff\xef?\xc4\xfcC\xc9\xe0j\x98\xbc\xfc\xff\xff\xff\xff\xff\xef?\xc4\xfcC\xc9\xe0j\x98\xbc\xfc\xff\xff\xff\xff\xff\xef?\xc4\xfcC\xc9\xe0j\x98\xbc\xfc\xff\xff\xff\xff\xff\xef?\xc4\xfcC\xc9\xe0j\x98\xbc\xfc\xff\xff\xff\xff\xff\xef?\xc4\xfcC\xc9\xe0j\x98\xbc\xfc\xff\xff\xff\xff\xff\xef?\xc4\xfcC\xc9\xe0j\x98\xbc\xfc\xff\xff\xff\xff\xff\xef?\xc4\xfcC\xc9\xe0j\x98\xbc\xfc\xff\xff\xff\xff\xff\xef?\xc4\xfcC\xc9\xe0j\x98\xbc\xfc\xff\xff\xff\xff\xff\xef?\xc4\xfcC\xc9\xe0j\x98\xbc\xfc\xff\xff\xff\xff\xff\xef?\xc4\xfcC\xc9\xe0j\x98\xbc\xfc\xff\xff\xff\xff\xff\xef?\xc4\xfcC\xc9\xe0j\x98\xbc\xfc\xff\xff\xff\xff\xff\xef?\xc4\xfcC\xc9\xe0j\x98\xbc\xfc\xff\xff\xff\xff\xff\xef?\xc4\xfcC\xc9\xe0j\x98\xbc\xfc\xff\xff\xff\xff\xff\xef?\xc4\xfcC\xc9\xe0j\x98\xbc\xfc\xff\xff\xff\xff\xff\xef?\xc4\xfcC\xc9\xe0j\x98\xbc\xfc\xff\xff\xff\xff\xff\xef?\xc4\xfcC\xc9\xe0j\x98\xbc\xfc\xff\xff\xff\xff\xff\xef?\xc4\xfcC\xc9\xe0j\x98\xbc\xfc\xff\xff\xff\xff\xff\xef?\xc4\xfcC\xc9\xe0j\x98\xbc\xfc\xff\xff\xff\xff\xff\xef?\xc4\xfcC\xc9\xe0j\x98\xbc\xfc\xff\xff\xff\xff\xff\xef?\xc4\xfcC\xc9\xe0j\x98\xbc\xfc\xff\xff\xff\xff\xff\xef?\xc4\xfcC\xc9\xe0j\x98\xbc\xfc\xff\xff\xff\xff\xff\xef?\xc4\xfcC\xc9\xe0j\x98\xbc\xfc\xff\xff\xff\xff\xff\xef?\xc4\xfcC\xc9\xe0j\x98\xbc\xfc\xff\xff\xff\xff\xff\xef?\xc4\xfcC\xc9\xe0j\x98\xbc\xfc\xff\xff\xff\xff\xff\xef?\xc4\xfcC\xc9\xe0j\x98\xbc\xfc\xff\xff\xff\xff\xff\xef?\xc4\xfcC\xc9\xe0j\x98\xbc\xfc\xff\xff\xff\xff\xff\xef?\xc4\xfcC\xc9\xe0j\x98\xbc\xfc\xff\xff\xff\xff\xff\xef?\xc4\xfcC\xc9\xe0j\x98\xbc\xfc\xff\xff\xff\xff\xff\xef?\xc4\xfcC\xc9\xe0j\x98\xbc\xfc\xff\xff\xff\xff\xff\xef?\xc4\xfcC\xc9\xe0j\x98\xbc\xfc\xff\xff\xff\xff\xff\xef?\xc4\xfcC\xc9\xe0j\x98\xbc\xfc\xff\xff\xff\xff\xff\xef?\xc4\xfcC\xc9\xe0j\x98\xbc\xfc\xff\xff\xff\xff\xff\xef?\xc4\xfcC\xc9\xe0j\x98\xbc\xfc\xff\xff\xff\xff\xff\xef?\xc4\xfcC\xc9\xe0j\x98\xbc\xfc\xff\xff\xff\xff\xff\xef?\xc4\xfcC\xc9\xe0j\x98\xbc\xfc\xff\xff\xff\xff\xff\xef?\xc4\xfcC\xc9\xe0j\x98\xbc\xfc\xff\xff\xff\xff\xff\xef?\xc4\xfcC\xc9\xe0j\x98\xbc\xfc\xff\xff\xff\xff\xff\xef?\xc4\xfcC\xc9\xe0j\x98\xbc\xfc\xff\xff\xff\xff\xff\xef?\xc4\xfcC\xc9\xe0j\x98\xbc\xfc\xff\xff\xff\xff\xff\xef?\xc4\xfcC\xc9\xe0j\x98\xbc\xfc\xff\xff\xff\xff\xff\xef?\xc4\xfcC\xc9\xe0j\x98\xbc\xfc\xff\xff\xff\xff\xff\xef?\xc4\xfcC\xc9\xe0j\x98\xbc\xfc\xff\xff\xff\xff\xff\xef?\xc4\xfcC\xc9\xe0j\x98\xbc\xfc\xff\xff\xff\xff\xff\xef?\xc4\xfcC\xc9\xe0j\x98\xbc\xfc\xff\xff\xff\xff\xff\xef?\xc4\xfcC\xc9\xe0j\x98\xbc\xfc\xff\xff\xff\xff\xff\xef?\xc4\xfcC\xc9\xe0j\x98\xbc\xfc\xff\xff\xff\xff\xff\xef?\xc4\xfcC\xc9\xe0j\x98\xbc\xfc\xff\xff\xff\xff\xff\xef?\xc4\xfcC\xc9\xe0j\x98\xbc\xfc\xff\xff\xff\xff\xff\xef?\xc4\xfcC\xc9\xe0j\x98\xbc\xfc\xff\xff\xff\xff\xff\xef?\xc4\xfcC\xc9\xe0j\x98\xbc\xfc\xff\xff\xff\xff\xff\xef?\xc4\xfcC\xc9\xe0j\x98\xbc\xfc\xff\xff\xff\xff\xff\xef?\xc4\xfcC\xc9\xe0j\x98\xbc\xfc\xff\xff\xff\xff\xff\xef?\xc4\xfcC\xc9\xe0j\x98\xbc\xfc\xff\xff\xff\xff\xff\xef?\xc4\xfcC\xc9\xe0j\x98\xbc\xfc\xff\xff\xff\xff\xff\xef?\xc4\xfcC\xc9\xe0j\x98\xbc\xfc\xff\xff\xff\xff\xff\xef?\xc4\xfcC\xc9\xe0j\x98\xbc\xfc\xff\xff\xff\xff\xff\xef?\xc4\xfcC\xc9\xe0j\x98\xbc\xfc\xff\xff\xff\xff\xff\xef?\xc4\xfcC\xc9\xe0j\x98\xbc\xfc\xff\xff\xff\xff\xff\xef?\xc4\xfcC\xc9\xe0j\x98\xbc\xfc\xff\xff\xff\xff\xff\xef?\xc4\xfcC\xc9\xe0j\x98\xbc\xfc\xff\xff\xff\xff\xff\xef?\xc4\xfcC\xc9\xe0j\x98\xbc\xfc\xff\xff\xff\xff\xff\xef?\xc4\xfcC\xc9\xe0j\x98\xbc\xfc\xff\xff\xff\xff\xff\xef?\xc4\xfcC\xc9\xe0j\x98\xbc\xfc\xff\xff\xff\xff\xff\xef?\xc4\xfcC\xc9\xe0j\x98\xbc\xfc\xff\xff\xff\xff\xff\xef?\xc4\xfcC\xc9\xe0j\x98\xbc\xfc\xff\xff\xff\xff\xff\xef?\xc4\xfcC\xc9\xe0j\x98\xbc\xfc\xff\xff\xff\xff\xff\xef?\xc4\xfcC\xc9\xe0j\x98\xbc\xfc\xff\xff\xff\xff\xff\xef?'
p185
tp186
bag2
(g3
(I0
tp187
g5
tp188
Rp189
(I1
(I2
I128
tp190
g12
I01
S'\xc4\xfcC\xc9\xe0j\x98\xbc\xfc\xff\xff\xff\xff\xff\xef?\xc4\xfcC\xc9\xe0j\x98\xbc\xfc\xff\xff\xff\xff\xff\xef?\xc4\xfcC\xc9\xe0j\x98\xbc\xfc\xff\xff\xff\xff\xff\xef?\xc4\xfcC\xc9\xe0j\x98\xbc\xfc\xff\xff\xff\xff\xff\xef?\xc4\xfcC\xc9\xe0j\x98\xbc\xfc\xff\xff\xff\xff\xff\xef?\xc4\xfcC\xc9\xe0j\x98\xbc\xfc\xff\xff\xff\xff\xff\xef?\xc4\xfcC\xc9\xe0j\x98\xbc\xfc\xff\xff\xff\xff\xff\xef?\xc4\xfcC\xc9\xe0j\x98\xbc\xfc\xff\xff\xff\xff\xff\xef?\xc4\xfcC\xc9\xe0j\x98\xbc\xfc\xff\xff\xff\xff\xff\xef?\xc4\xfcC\xc9\xe0j\x98\xbc\xfc\xff\xff\xff\xff\xff\xef?\xc4\xfcC\xc9\xe0j\x98\xbc\xfc\xff\xff\xff\xff\xff\xef?\xc4\xfcC\xc9\xe0j\x98\xbc\xfc\xff\xff\xff\xff\xff\xef?\xc4\xfcC\xc9\xe0j\x98\xbc\xfc\xff\xff\xff\xff\xff\xef?\xc4\xfcC\xc9\xe0j\x98\xbc\xfc\xff\xff\xff\xff\xff\xef?\xc4\xfcC\xc9\xe0j\x98\xbc\xfc\xff\xff\xff\xff\xff\xef?\xc4\xfcC\xc9\xe0j\x98\xbc\xfc\xff\xff\xff\xff\xff\xef?\xc4\xfcC\xc9\xe0j\x98\xbc\xfc\xff\xff\xff\xff\xff\xef?\xc4\xfcC\xc9\xe0j\x98\xbc\xfc\xff\xff\xff\xff\xff\xef?\xc4\xfcC\xc9\xe0j\x98\xbc\xfc\xff\xff\xff\xff\xff\xef?\xc4\xfcC\xc9\xe0j\x98\xbc\xfc\xff\xff\xff\xff\xff\xef?\xc4\xfcC\xc9\xe0j\x98\xbc\xfc\xff\xff\xff\xff\xff\xef?\xc4\xfcC\xc9\xe0j\x98\xbc\xfc\xff\xff\xff\xff\xff\xef?\xc4\xfcC\xc9\xe0j\x98\xbc\xfc\xff\xff\xff\xff\xff\xef?\xc4\xfcC\xc9\xe0j\x98\xbc\xfc\xff\xff\xff\xff\xff\xef?\xc4\xfcC\xc9\xe0j\x98\xbc\xfc\xff\xff\xff\xff\xff\xef?\xc4\xfcC\xc9\xe0j\x98\xbc\xfc\xff\xff\xff\xff\xff\xef?\xc4\xfcC\xc9\xe0j\x98\xbc\xfc\xff\xff\xff\xff\xff\xef?\xc4\xfcC\xc9\xe0j\x98\xbc\xfc\xff\xff\xff\xff\xff\xef?\xc4\xfcC\xc9\xe0j\x98\xbc\xfc\xff\xff\xff\xff\xff\xef?\xc4\xfcC\xc9\xe0j\x98\xbc\xfc\xff\xff\xff\xff\xff\xef?\xc4\xfcC\xc9\xe0j\x98\xbc\xfc\xff\xff\xff\xff\xff\xef?\xc4\xfcC\xc9\xe0j\x98\xbc\xfc\xff\xff\xff\xff\xff\xef?\xc4\xfcC\xc9\xe0j\x98\xbc\xfc\xff\xff\xff\xff\xff\xef?\xc4\xfcC\xc9\xe0j\x98\xbc\xfc\xff\xff\xff\xff\xff\xef?\xc4\xfcC\xc9\xe0j\x98\xbc\xfc\xff\xff\xff\xff\xff\xef?\xc4\xfcC\xc9\xe0j\x98\xbc\xfc\xff\xff\xff\xff\xff\xef?\xc4\xfcC\xc9\xe0j\x98\xbc\xfc\xff\xff\xff\xff\xff\xef?\xc4\xfcC\xc9\xe0j\x98\xbc\xfc\xff\xff\xff\xff\xff\xef?\xc4\xfcC\xc9\xe0j\x98\xbc\xfc\xff\xff\xff\xff\xff\xef?\xc4\xfcC\xc9\xe0j\x98\xbc\xfc\xff\xff\xff\xff\xff\xef?\xc4\xfcC\xc9\xe0j\x98\xbc\xfc\xff\xff\xff\xff\xff\xef?\xc4\xfcC\xc9\xe0j\x98\xbc\xfc\xff\xff\xff\xff\xff\xef?\xc4\xfcC\xc9\xe0j\x98\xbc\xfc\xff\xff\xff\xff\xff\xef?\xc4\xfcC\xc9\xe0j\x98\xbc\xfc\xff\xff\xff\xff\xff\xef?\xc4\xfcC\xc9\xe0j\x98\xbc\xfc\xff\xff\xff\xff\xff\xef?\xc4\xfcC\xc9\xe0j\x98\xbc\xfc\xff\xff\xff\xff\xff\xef?\xc4\xfcC\xc9\xe0j\x98\xbc\xfc\xff\xff\xff\xff\xff\xef?\xc4\xfcC\xc9\xe0j\x98\xbc\xfc\xff\xff\xff\xff\xff\xef?\xc4\xfcC\xc9\xe0j\x98\xbc\xfc\xff\xff\xff\xff\xff\xef?\xc4\xfcC\xc9\xe0j\x98\xbc\xfc\xff\xff\xff\xff\xff\xef?\xc4\xfcC\xc9\xe0j\x98\xbc\xfc\xff\xff\xff\xff\xff\xef?\xc4\xfcC\xc9\xe0j\x98\xbc\xfc\xff\xff\xff\xff\xff\xef?\xc4\xfcC\xc9\xe0j\x98\xbc\xfc\xff\xff\xff\xff\xff\xef?\xc4\xfcC\xc9\xe0j\x98\xbc\xfc\xff\xff\xff\xff\xff\xef?\xc4\xfcC\xc9\xe0j\x98\xbc\xfc\xff\xff\xff\xff\xff\xef?\xc4\xfcC\xc9\xe0j\x98\xbc\xfc\xff\xff\xff\xff\xff\xef?\xc4\xfcC\xc9\xe0j\x98\xbc\xfc\xff\xff\xff\xff\xff\xef?\xc4\xfcC\xc9\xe0j\x98\xbc\xfc\xff\xff\xff\xff\xff\xef?\xc4\xfcC\xc9\xe0j\x98\xbc\xfc\xff\xff\xff\xff\xff\xef?\xc4\xfcC\xc9\xe0j\x98\xbc\xfc\xff\xff\xff\xff\xff\xef?\xc4\xfcC\xc9\xe0j\x98\xbc\xfc\xff\xff\xff\xff\xff\xef?\xc4\xfcC\xc9\xe0j\x98\xbc\xfc\xff\xff\xff\xff\xff\xef?\xc4\xfcC\xc9\xe0j\x98\xbc\xfc\xff\xff\xff\xff\xff\xef?\xc4\xfcC\xc9\xe0j\x98\xbc\xfc\xff\xff\xff\xff\xff\xef?\xc4\xfcC\xc9\xe0j\x98\xbc\xfc\xff\xff\xff\xff\xff\xef?\xc4\xfcC\xc9\xe0j\x98\xbc\xfc\xff\xff\xff\xff\xff\xef?\xc4\xfcC\xc9\xe0j\x98\xbc\xfc\xff\xff\xff\xff\xff\xef?\xc4\xfcC\xc9\xe0j\x98\xbc\xfc\xff\xff\xff\xff\xff\xef?\xc4\xfcC\xc9\xe0j\x98\xbc\xfc\xff\xff\xff\xff\xff\xef?\xc4\xfcC\xc9\xe0j\x98\xbc\xfc\xff\xff\xff\xff\xff\xef?\xc4\xfcC\xc9\xe0j\x98\xbc\xfc\xff\xff\xff\xff\xff\xef?\xc4\xfcC\xc9\xe0j\x98\xbc\xfc\xff\xff\xff\xff\xff\xef?\xc4\xfcC\xc9\xe0j\x98\xbc\xfc\xff\xff\xff\xff\xff\xef?\xc4\xfcC\xc9\xe0j\x98\xbc\xfc\xff\xff\xff\xff\xff\xef?\xc4\xfcC\xc9\xe0j\x98\xbc\xfc\xff\xff\xff\xff\xff\xef?\xc4\xfcC\xc9\xe0j\x98\xbc\xfc\xff\xff\xff\xff\xff\xef?\xc4\xfcC\xc9\xe0j\x98\xbc\xfc\xff\xff\xff\xff\xff\xef?\xc4\xfcC\xc9\xe0j\x98\xbc\xfc\xff\xff\xff\xff\xff\xef?\xc4\xfcC\xc9\xe0j\x98\xbc\xfc\xff\xff\xff\xff\xff\xef?\xc4\xfcC\xc9\xe0j\x98\xbc\xfc\xff\xff\xff\xff\xff\xef?\xc4\xfcC\xc9\xe0j\x98\xbc\xfc\xff\xff\xff\xff\xff\xef?\xc4\xfcC\xc9\xe0j\x98\xbc\xfc\xff\xff\xff\xff\xff\xef?\xc4\xfcC\xc9\xe0j\x98\xbc\xfc\xff\xff\xff\xff\xff\xef?\xc4\xfcC\xc9\xe0j\x98\xbc\xfc\xff\xff\xff\xff\xff\xef?\xc4\xfcC\xc9\xe0j\x98\xbc\xfc\xff\xff\xff\xff\xff\xef?\xc4\xfcC\xc9\xe0j\x98\xbc\xfc\xff\xff\xff\xff\xff\xef?\xc4\xfcC\xc9\xe0j\x98\xbc\xfc\xff\xff\xff\xff\xff\xef?\xc4\xfcC\xc9\xe0j\x98\xbc\xfc\xff\xff\xff\xff\xff\xef?\xc4\xfcC\xc9\xe0j\x98\xbc\xfc\xff\xff\xff\xff\xff\xef?\xc4\xfcC\xc9\xe0j\x98\xbc\xfc\xff\xff\xff\xff\xff\xef?\xc4\xfcC\xc9\xe0j\x98\xbc\xfc\xff\xff\xff\xff\xff\xef?\xc4\xfcC\xc9\xe0j\x98\xbc\xfc\xff\xff\xff\xff\xff\xef?\xc4\xfcC\xc9\xe0j\x98\xbc\xfc\xff\xff\xff\xff\xff\xef?\xc4\xfcC\xc9\xe0j\x98\xbc\xfc\xff\xff\xff\xff\xff\xef?\xc4\xfcC\xc9\xe0j\x98\xbc\xfc\xff\xff\xff\xff\xff\xef?\xc4\xfcC\xc9\xe0j\x98\xbc\xfc\xff\xff\xff\xff\xff\xef?\xc4\xfcC\xc9\xe0j\x98\xbc\xfc\xff\xff\xff\xff\xff\xef?\xc4\xfcC\xc9\xe0j\x98\xbc\xfc\xff\xff\xff\xff\xff\xef?\xc4\xfcC\xc9\xe0j\x98\xbc\xfc\xff\xff\xff\xff\xff\xef?\xc4\xfcC\xc9\xe0j\x98\xbc\xfc\xff\xff\xff\xff\xff\xef?\xc4\xfcC\xc9\xe0j\x98\xbc\xfc\xff\xff\xff\xff\xff\xef?\xc4\xfcC\xc9\xe0j\x98\xbc\xfc\xff\xff\xff\xff\xff\xef?\xc4\xfcC\xc9\xe0j\x98\xbc\xfc\xff\xff\xff\xff\xff\xef?\xc4\xfcC\xc9\xe0j\x98\xbc\xfc\xff\xff\xff\xff\xff\xef?\xc4\xfcC\xc9\xe0j\x98\xbc\xfc\xff\xff\xff\xff\xff\xef?\xc4\xfcC\xc9\xe0j\x98\xbc\xfc\xff\xff\xff\xff\xff\xef?\xc4\xfcC\xc9\xe0j\x98\xbc\xfc\xff\xff\xff\xff\xff\xef?\xc4\xfcC\xc9\xe0j\x98\xbc\xfc\xff\xff\xff\xff\xff\xef?\xc4\xfcC\xc9\xe0j\x98\xbc\xfc\xff\xff\xff\xff\xff\xef?\xc4\xfcC\xc9\xe0j\x98\xbc\xfc\xff\xff\xff\xff\xff\xef?\xc4\xfcC\xc9\xe0j\x98\xbc\xfc\xff\xff\xff\xff\xff\xef?\xc4\xfcC\xc9\xe0j\x98\xbc\xfc\xff\xff\xff\xff\xff\xef?\xc4\xfcC\xc9\xe0j\x98\xbc\xfc\xff\xff\xff\xff\xff\xef?\xc4\xfcC\xc9\xe0j\x98\xbc\xfc\xff\xff\xff\xff\xff\xef?\xc4\xfcC\xc9\xe0j\x98\xbc\xfc\xff\xff\xff\xff\xff\xef?\xc4\xfcC\xc9\xe0j\x98\xbc\xfc\xff\xff\xff\xff\xff\xef?\xc4\xfcC\xc9\xe0j\x98\xbc\xfc\xff\xff\xff\xff\xff\xef?\xc4\xfcC\xc9\xe0j\x98\xbc\xfc\xff\xff\xff\xff\xff\xef?\xc4\xfcC\xc9\xe0j\x98\xbc\xfc\xff\xff\xff\xff\xff\xef?\xc4\xfcC\xc9\xe0j\x98\xbc\xfc\xff\xff\xff\xff\xff\xef?\xc4\xfcC\xc9\xe0j\x98\xbc\xfc\xff\xff\xff\xff\xff\xef?\xc4\xfcC\xc9\xe0j\x98\xbc\xfc\xff\xff\xff\xff\xff\xef?\xc4\xfcC\xc9\xe0j\x98\xbc\xfc\xff\xff\xff\xff\xff\xef?\xc4\xfcC\xc9\xe0j\x98\xbc\xfc\xff\xff\xff\xff\xff\xef?\xc4\xfcC\xc9\xe0j\x98\xbc\xfc\xff\xff\xff\xff\xff\xef?\xc4\xfcC\xc9\xe0j\x98\xbc\xfc\xff\xff\xff\xff\xff\xef?\xc4\xfcC\xc9\xe0j\x98\xbc\xfc\xff\xff\xff\xff\xff\xef?\xc4\xfcC\xc9\xe0j\x98\xbc\xfc\xff\xff\xff\xff\xff\xef?'
p191
tp192
bag2
(g3
(I0
tp193
g5
tp194
Rp195
(I1
(I2
I247
tp196
g12
I01
S'\xc4\xfcC\xc9\xe0j\x98\xbc\xfc\xff\xff\xff\xff\xff\xef?\xc4\xfcC\xc9\xe0j\x98\xbc\xfc\xff\xff\xff\xff\xff\xef?\xc4\xfcC\xc9\xe0j\x98\xbc\xfc\xff\xff\xff\xff\xff\xef?\xc4\xfcC\xc9\xe0j\x98\xbc\xfc\xff\xff\xff\xff\xff\xef?\xc4\xfcC\xc9\xe0j\x98\xbc\xfc\xff\xff\xff\xff\xff\xef?\xc4\xfcC\xc9\xe0j\x98\xbc\xfc\xff\xff\xff\xff\xff\xef?\xc4\xfcC\xc9\xe0j\x98\xbc\xfc\xff\xff\xff\xff\xff\xef?\xc4\xfcC\xc9\xe0j\x98\xbc\xfc\xff\xff\xff\xff\xff\xef?\xc4\xfcC\xc9\xe0j\x98\xbc\xfc\xff\xff\xff\xff\xff\xef?\xc4\xfcC\xc9\xe0j\x98\xbc\xfc\xff\xff\xff\xff\xff\xef?\xc4\xfcC\xc9\xe0j\x98\xbc\xfc\xff\xff\xff\xff\xff\xef?\xc4\xfcC\xc9\xe0j\x98\xbc\xfc\xff\xff\xff\xff\xff\xef?\xc4\xfcC\xc9\xe0j\x98\xbc\xfc\xff\xff\xff\xff\xff\xef?\xc4\xfcC\xc9\xe0j\x98\xbc\xfc\xff\xff\xff\xff\xff\xef?\xc4\xfcC\xc9\xe0j\x98\xbc\xfc\xff\xff\xff\xff\xff\xef?\xc4\xfcC\xc9\xe0j\x98\xbc\xfc\xff\xff\xff\xff\xff\xef?\xc4\xfcC\xc9\xe0j\x98\xbc\xfc\xff\xff\xff\xff\xff\xef?\xc4\xfcC\xc9\xe0j\x98\xbc\xfc\xff\xff\xff\xff\xff\xef?\xc4\xfcC\xc9\xe0j\x98\xbc\xfc\xff\xff\xff\xff\xff\xef?\xc4\xfcC\xc9\xe0j\x98\xbc\xfc\xff\xff\xff\xff\xff\xef?\xc4\xfcC\xc9\xe0j\x98\xbc\xfc\xff\xff\xff\xff\xff\xef?\xc4\xfcC\xc9\xe0j\x98\xbc\xfc\xff\xff\xff\xff\xff\xef?\xc4\xfcC\xc9\xe0j\x98\xbc\xfc\xff\xff\xff\xff\xff\xef?\xc4\xfcC\xc9\xe0j\x98\xbc\xfc\xff\xff\xff\xff\xff\xef?\xc4\xfcC\xc9\xe0j\x98\xbc\xfc\xff\xff\xff\xff\xff\xef?\xc4\xfcC\xc9\xe0j\x98\xbc\xfc\xff\xff\xff\xff\xff\xef?\xc4\xfcC\xc9\xe0j\x98\xbc\xfc\xff\xff\xff\xff\xff\xef?\xc4\xfcC\xc9\xe0j\x98\xbc\xfc\xff\xff\xff\xff\xff\xef?\xc4\xfcC\xc9\xe0j\x98\xbc\xfc\xff\xff\xff\xff\xff\xef?\xc4\xfcC\xc9\xe0j\x98\xbc\xfc\xff\xff\xff\xff\xff\xef?\xc4\xfcC\xc9\xe0j\x98\xbc\xfc\xff\xff\xff\xff\xff\xef?\xc4\xfcC\xc9\xe0j\x98\xbc\xfc\xff\xff\xff\xff\xff\xef?\xc4\xfcC\xc9\xe0j\x98\xbc\xfc\xff\xff\xff\xff\xff\xef?\xc4\xfcC\xc9\xe0j\x98\xbc\xfc\xff\xff\xff\xff\xff\xef?\xc4\xfcC\xc9\xe0j\x98\xbc\xfc\xff\xff\xff\xff\xff\xef?\xc4\xfcC\xc9\xe0j\x98\xbc\xfc\xff\xff\xff\xff\xff\xef?\xc4\xfcC\xc9\xe0j\x98\xbc\xfc\xff\xff\xff\xff\xff\xef?\xc4\xfcC\xc9\xe0j\x98\xbc\xfc\xff\xff\xff\xff\xff\xef?\xc4\xfcC\xc9\xe0j\x98\xbc\xfc\xff\xff\xff\xff\xff\xef?\xc4\xfcC\xc9\xe0j\x98\xbc\xfc\xff\xff\xff\xff\xff\xef?\xc4\xfcC\xc9\xe0j\x98\xbc\xfc\xff\xff\xff\xff\xff\xef?\xc4\xfcC\xc9\xe0j\x98\xbc\xfc\xff\xff\xff\xff\xff\xef?\xc4\xfcC\xc9\xe0j\x98\xbc\xfc\xff\xff\xff\xff\xff\xef?\xc4\xfcC\xc9\xe0j\x98\xbc\xfc\xff\xff\xff\xff\xff\xef?\xc4\xfcC\xc9\xe0j\x98\xbc\xfc\xff\xff\xff\xff\xff\xef?\xc4\xfcC\xc9\xe0j\x98\xbc\xfc\xff\xff\xff\xff\xff\xef?\xc4\xfcC\xc9\xe0j\x98\xbc\xfc\xff\xff\xff\xff\xff\xef?\xc4\xfcC\xc9\xe0j\x98\xbc\xfc\xff\xff\xff\xff\xff\xef?\xc4\xfcC\xc9\xe0j\x98\xbc\xfc\xff\xff\xff\xff\xff\xef?\xc4\xfcC\xc9\xe0j\x98\xbc\xfc\xff\xff\xff\xff\xff\xef?\xc4\xfcC\xc9\xe0j\x98\xbc\xfc\xff\xff\xff\xff\xff\xef?\xc4\xfcC\xc9\xe0j\x98\xbc\xfc\xff\xff\xff\xff\xff\xef?\xc4\xfcC\xc9\xe0j\x98\xbc\xfc\xff\xff\xff\xff\xff\xef?\xc4\xfcC\xc9\xe0j\x98\xbc\xfc\xff\xff\xff\xff\xff\xef?\xc4\xfcC\xc9\xe0j\x98\xbc\xfc\xff\xff\xff\xff\xff\xef?\xc4\xfcC\xc9\xe0j\x98\xbc\xfc\xff\xff\xff\xff\xff\xef?\xc4\xfcC\xc9\xe0j\x98\xbc\xfc\xff\xff\xff\xff\xff\xef?\xc4\xfcC\xc9\xe0j\x98\xbc\xfc\xff\xff\xff\xff\xff\xef?\xc4\xfcC\xc9\xe0j\x98\xbc\xfc\xff\xff\xff\xff\xff\xef?\xc4\xfcC\xc9\xe0j\x98\xbc\xfc\xff\xff\xff\xff\xff\xef?\xc4\xfcC\xc9\xe0j\x98\xbc\xfc\xff\xff\xff\xff\xff\xef?\xc4\xfcC\xc9\xe0j\x98\xbc\xfc\xff\xff\xff\xff\xff\xef?\xc4\xfcC\xc9\xe0j\x98\xbc\xfc\xff\xff\xff\xff\xff\xef?\xc4\xfcC\xc9\xe0j\x98\xbc\xfc\xff\xff\xff\xff\xff\xef?\xc4\xfcC\xc9\xe0j\x98\xbc\xfc\xff\xff\xff\xff\xff\xef?\xc4\xfcC\xc9\xe0j\x98\xbc\xfc\xff\xff\xff\xff\xff\xef?\xc4\xfcC\xc9\xe0j\x98\xbc\xfc\xff\xff\xff\xff\xff\xef?\xc4\xfcC\xc9\xe0j\x98\xbc\xfc\xff\xff\xff\xff\xff\xef?\xc4\xfcC\xc9\xe0j\x98\xbc\xfc\xff\xff\xff\xff\xff\xef?\xc4\xfcC\xc9\xe0j\x98\xbc\xfc\xff\xff\xff\xff\xff\xef?\xc4\xfcC\xc9\xe0j\x98\xbc\xfc\xff\xff\xff\xff\xff\xef?\xc4\xfcC\xc9\xe0j\x98\xbc\xfc\xff\xff\xff\xff\xff\xef?\xc4\xfcC\xc9\xe0j\x98\xbc\xfc\xff\xff\xff\xff\xff\xef?\xc4\xfcC\xc9\xe0j\x98\xbc\xfc\xff\xff\xff\xff\xff\xef?\xc4\xfcC\xc9\xe0j\x98\xbc\xfc\xff\xff\xff\xff\xff\xef?\xc4\xfcC\xc9\xe0j\x98\xbc\xfc\xff\xff\xff\xff\xff\xef?\xc4\xfcC\xc9\xe0j\x98\xbc\xfc\xff\xff\xff\xff\xff\xef?\xc4\xfcC\xc9\xe0j\x98\xbc\xfc\xff\xff\xff\xff\xff\xef?\xc4\xfcC\xc9\xe0j\x98\xbc\xfc\xff\xff\xff\xff\xff\xef?\xc4\xfcC\xc9\xe0j\x98\xbc\xfc\xff\xff\xff\xff\xff\xef?\xc4\xfcC\xc9\xe0j\x98\xbc\xfc\xff\xff\xff\xff\xff\xef?\xc4\xfcC\xc9\xe0j\x98\xbc\xfc\xff\xff\xff\xff\xff\xef?\xc4\xfcC\xc9\xe0j\x98\xbc\xfc\xff\xff\xff\xff\xff\xef?\xc4\xfcC\xc9\xe0j\x98\xbc\xfc\xff\xff\xff\xff\xff\xef?\xc4\xfcC\xc9\xe0j\x98\xbc\xfc\xff\xff\xff\xff\xff\xef?\xc4\xfcC\xc9\xe0j\x98\xbc\xfc\xff\xff\xff\xff\xff\xef?\xc4\xfcC\xc9\xe0j\x98\xbc\xfc\xff\xff\xff\xff\xff\xef?\xc4\xfcC\xc9\xe0j\x98\xbc\xfc\xff\xff\xff\xff\xff\xef?\xc4\xfcC\xc9\xe0j\x98\xbc\xfc\xff\xff\xff\xff\xff\xef?\xc4\xfcC\xc9\xe0j\x98\xbc\xfc\xff\xff\xff\xff\xff\xef?\xc4\xfcC\xc9\xe0j\x98\xbc\xfc\xff\xff\xff\xff\xff\xef?\xc4\xfcC\xc9\xe0j\x98\xbc\xfc\xff\xff\xff\xff\xff\xef?\xc4\xfcC\xc9\xe0j\x98\xbc\xfc\xff\xff\xff\xff\xff\xef?\xc4\xfcC\xc9\xe0j\x98\xbc\xfc\xff\xff\xff\xff\xff\xef?\xc4\xfcC\xc9\xe0j\x98\xbc\xfc\xff\xff\xff\xff\xff\xef?\xc4\xfcC\xc9\xe0j\x98\xbc\xfc\xff\xff\xff\xff\xff\xef?\xc4\xfcC\xc9\xe0j\x98\xbc\xfc\xff\xff\xff\xff\xff\xef?\xc4\xfcC\xc9\xe0j\x98\xbc\xfc\xff\xff\xff\xff\xff\xef?\xc4\xfcC\xc9\xe0j\x98\xbc\xfc\xff\xff\xff\xff\xff\xef?\xc4\xfcC\xc9\xe0j\x98\xbc\xfc\xff\xff\xff\xff\xff\xef?\xc4\xfcC\xc9\xe0j\x98\xbc\xfc\xff\xff\xff\xff\xff\xef?\xc4\xfcC\xc9\xe0j\x98\xbc\xfc\xff\xff\xff\xff\xff\xef?\xc4\xfcC\xc9\xe0j\x98\xbc\xfc\xff\xff\xff\xff\xff\xef?\xc4\xfcC\xc9\xe0j\x98\xbc\xfc\xff\xff\xff\xff\xff\xef?\xc4\xfcC\xc9\xe0j\x98\xbc\xfc\xff\xff\xff\xff\xff\xef?\xc4\xfcC\xc9\xe0j\x98\xbc\xfc\xff\xff\xff\xff\xff\xef?\xc4\xfcC\xc9\xe0j\x98\xbc\xfc\xff\xff\xff\xff\xff\xef?\xc4\xfcC\xc9\xe0j\x98\xbc\xfc\xff\xff\xff\xff\xff\xef?\xc4\xfcC\xc9\xe0j\x98\xbc\xfc\xff\xff\xff\xff\xff\xef?\xc4\xfcC\xc9\xe0j\x98\xbc\xfc\xff\xff\xff\xff\xff\xef?\xc4\xfcC\xc9\xe0j\x98\xbc\xfc\xff\xff\xff\xff\xff\xef?\xc4\xfcC\xc9\xe0j\x98\xbc\xfc\xff\xff\xff\xff\xff\xef?\xc4\xfcC\xc9\xe0j\x98\xbc\xfc\xff\xff\xff\xff\xff\xef?\xc4\xfcC\xc9\xe0j\x98\xbc\xfc\xff\xff\xff\xff\xff\xef?\xc4\xfcC\xc9\xe0j\x98\xbc\xfc\xff\xff\xff\xff\xff\xef?\xc4\xfcC\xc9\xe0j\x98\xbc\xfc\xff\xff\xff\xff\xff\xef?\xc4\xfcC\xc9\xe0j\x98\xbc\xfc\xff\xff\xff\xff\xff\xef?\xc4\xfcC\xc9\xe0j\x98\xbc\xfc\xff\xff\xff\xff\xff\xef?\xc4\xfcC\xc9\xe0j\x98\xbc\xfc\xff\xff\xff\xff\xff\xef?\xc4\xfcC\xc9\xe0j\x98\xbc\xfc\xff\xff\xff\xff\xff\xef?\xc4\xfcC\xc9\xe0j\x98\xbc\xfc\xff\xff\xff\xff\xff\xef?\xc4\xfcC\xc9\xe0j\x98\xbc\xfc\xff\xff\xff\xff\xff\xef?\xc4\xfcC\xc9\xe0j\x98\xbc\xfc\xff\xff\xff\xff\xff\xef?\xc4\xfcC\xc9\xe0j\x98\xbc\xfc\xff\xff\xff\xff\xff\xef?\xc4\xfcC\xc9\xe0j\x98\xbc\xfc\xff\xff\xff\xff\xff\xef?\xc4\xfcC\xc9\xe0j\x98\xbc\xfc\xff\xff\xff\xff\xff\xef?\xc4\xfcC\xc9\xe0j\x98\xbc\xfc\xff\xff\xff\xff\xff\xef?\xc4\xfcC\xc9\xe0j\x98\xbc\xfc\xff\xff\xff\xff\xff\xef?\xc4\xfcC\xc9\xe0j\x98\xbc\xfc\xff\xff\xff\xff\xff\xef?\xc4\xfcC\xc9\xe0j\x98\xbc\xfc\xff\xff\xff\xff\xff\xef?\xc4\xfcC\xc9\xe0j\x98\xbc\xfc\xff\xff\xff\xff\xff\xef?\xc4\xfcC\xc9\xe0j\x98\xbc\xfc\xff\xff\xff\xff\xff\xef?\xc4\xfcC\xc9\xe0j\x98\xbc\xfc\xff\xff\xff\xff\xff\xef?\xc4\xfcC\xc9\xe0j\x98\xbc\xfc\xff\xff\xff\xff\xff\xef?\xc4\xfcC\xc9\xe0j\x98\xbc\xfc\xff\xff\xff\xff\xff\xef?\xc4\xfcC\xc9\xe0j\x98\xbc\xfc\xff\xff\xff\xff\xff\xef?\xc4\xfcC\xc9\xe0j\x98\xbc\xfc\xff\xff\xff\xff\xff\xef?\xc4\xfcC\xc9\xe0j\x98\xbc\xfc\xff\xff\xff\xff\xff\xef?\xc4\xfcC\xc9\xe0j\x98\xbc\xfc\xff\xff\xff\xff\xff\xef?\xc4\xfcC\xc9\xe0j\x98\xbc\xfc\xff\xff\xff\xff\xff\xef?\xc4\xfcC\xc9\xe0j\x98\xbc\xfc\xff\xff\xff\xff\xff\xef?\xc4\xfcC\xc9\xe0j\x98\xbc\xfc\xff\xff\xff\xff\xff\xef?\xc4\xfcC\xc9\xe0j\x98\xbc\xfc\xff\xff\xff\xff\xff\xef?\xc4\xfcC\xc9\xe0j\x98\xbc\xfc\xff\xff\xff\xff\xff\xef?\xc4\xfcC\xc9\xe0j\x98\xbc\xfc\xff\xff\xff\xff\xff\xef?\xc4\xfcC\xc9\xe0j\x98\xbc\xfc\xff\xff\xff\xff\xff\xef?\xc4\xfcC\xc9\xe0j\x98\xbc\xfc\xff\xff\xff\xff\xff\xef?\xc4\xfcC\xc9\xe0j\x98\xbc\xfc\xff\xff\xff\xff\xff\xef?\xc4\xfcC\xc9\xe0j\x98\xbc\xfc\xff\xff\xff\xff\xff\xef?\xc4\xfcC\xc9\xe0j\x98\xbc\xfc\xff\xff\xff\xff\xff\xef?\xc4\xfcC\xc9\xe0j\x98\xbc\xfc\xff\xff\xff\xff\xff\xef?\xc4\xfcC\xc9\xe0j\x98\xbc\xfc\xff\xff\xff\xff\xff\xef?\xc4\xfcC\xc9\xe0j\x98\xbc\xfc\xff\xff\xff\xff\xff\xef?\xc4\xfcC\xc9\xe0j\x98\xbc\xfc\xff\xff\xff\xff\xff\xef?\xc4\xfcC\xc9\xe0j\x98\xbc\xfc\xff\xff\xff\xff\xff\xef?\xc4\xfcC\xc9\xe0j\x98\xbc\xfc\xff\xff\xff\xff\xff\xef?\xc4\xfcC\xc9\xe0j\x98\xbc\xfc\xff\xff\xff\xff\xff\xef?\xc4\xfcC\xc9\xe0j\x98\xbc\xfc\xff\xff\xff\xff\xff\xef?\xc4\xfcC\xc9\xe0j\x98\xbc\xfc\xff\xff\xff\xff\xff\xef?\xc4\xfcC\xc9\xe0j\x98\xbc\xfc\xff\xff\xff\xff\xff\xef?\xc4\xfcC\xc9\xe0j\x98\xbc\xfc\xff\xff\xff\xff\xff\xef?\xc4\xfcC\xc9\xe0j\x98\xbc\xfc\xff\xff\xff\xff\xff\xef?\xc4\xfcC\xc9\xe0j\x98\xbc\xfc\xff\xff\xff\xff\xff\xef?\xc4\xfcC\xc9\xe0j\x98\xbc\xfc\xff\xff\xff\xff\xff\xef?\xc4\xfcC\xc9\xe0j\x98\xbc\xfc\xff\xff\xff\xff\xff\xef?\xc4\xfcC\xc9\xe0j\x98\xbc\xfc\xff\xff\xff\xff\xff\xef?\xc4\xfcC\xc9\xe0j\x98\xbc\xfc\xff\xff\xff\xff\xff\xef?\xc4\xfcC\xc9\xe0j\x98\xbc\xfc\xff\xff\xff\xff\xff\xef?\xc4\xfcC\xc9\xe0j\x98\xbc\xfc\xff\xff\xff\xff\xff\xef?\xc4\xfcC\xc9\xe0j\x98\xbc\xfc\xff\xff\xff\xff\xff\xef?\xc4\xfcC\xc9\xe0j\x98\xbc\xfc\xff\xff\xff\xff\xff\xef?\xc4\xfcC\xc9\xe0j\x98\xbc\xfc\xff\xff\xff\xff\xff\xef?\xc4\xfcC\xc9\xe0j\x98\xbc\xfc\xff\xff\xff\xff\xff\xef?\xc4\xfcC\xc9\xe0j\x98\xbc\xfc\xff\xff\xff\xff\xff\xef?\xc4\xfcC\xc9\xe0j\x98\xbc\xfc\xff\xff\xff\xff\xff\xef?\xc4\xfcC\xc9\xe0j\x98\xbc\xfc\xff\xff\xff\xff\xff\xef?\xc4\xfcC\xc9\xe0j\x98\xbc\xfc\xff\xff\xff\xff\xff\xef?\xc4\xfcC\xc9\xe0j\x98\xbc\xfc\xff\xff\xff\xff\xff\xef?\xc4\xfcC\xc9\xe0j\x98\xbc\xfc\xff\xff\xff\xff\xff\xef?\xc4\xfcC\xc9\xe0j\x98\xbc\xfc\xff\xff\xff\xff\xff\xef?\xc4\xfcC\xc9\xe0j\x98\xbc\xfc\xff\xff\xff\xff\xff\xef?\xc4\xfcC\xc9\xe0j\x98\xbc\xfc\xff\xff\xff\xff\xff\xef?\xc4\xfcC\xc9\xe0j\x98\xbc\xfc\xff\xff\xff\xff\xff\xef?\xc4\xfcC\xc9\xe0j\x98\xbc\xfc\xff\xff\xff\xff\xff\xef?\xc4\xfcC\xc9\xe0j\x98\xbc\xfc\xff\xff\xff\xff\xff\xef?\xc4\xfcC\xc9\xe0j\x98\xbc\xfc\xff\xff\xff\xff\xff\xef?\xc4\xfcC\xc9\xe0j\x98\xbc\xfc\xff\xff\xff\xff\xff\xef?\xc4\xfcC\xc9\xe0j\x98\xbc\xfc\xff\xff\xff\xff\xff\xef?\xc4\xfcC\xc9\xe0j\x98\xbc\xfc\xff\xff\xff\xff\xff\xef?\xc4\xfcC\xc9\xe0j\x98\xbc\xfc\xff\xff\xff\xff\xff\xef?\xc4\xfcC\xc9\xe0j\x98\xbc\xfc\xff\xff\xff\xff\xff\xef?\xc4\xfcC\xc9\xe0j\x98\xbc\xfc\xff\xff\xff\xff\xff\xef?\xc4\xfcC\xc9\xe0j\x98\xbc\xfc\xff\xff\xff\xff\xff\xef?\xc4\xfcC\xc9\xe0j\x98\xbc\xfc\xff\xff\xff\xff\xff\xef?\xc4\xfcC\xc9\xe0j\x98\xbc\xfc\xff\xff\xff\xff\xff\xef?\xc4\xfcC\xc9\xe0j\x98\xbc\xfc\xff\xff\xff\xff\xff\xef?\xc4\xfcC\xc9\xe0j\x98\xbc\xfc\xff\xff\xff\xff\xff\xef?\xc4\xfcC\xc9\xe0j\x98\xbc\xfc\xff\xff\xff\xff\xff\xef?\xc4\xfcC\xc9\xe0j\x98\xbc\xfc\xff\xff\xff\xff\xff\xef?\xc4\xfcC\xc9\xe0j\x98\xbc\xfc\xff\xff\xff\xff\xff\xef?\xc4\xfcC\xc9\xe0j\x98\xbc\xfc\xff\xff\xff\xff\xff\xef?\xc4\xfcC\xc9\xe0j\x98\xbc\xfc\xff\xff\xff\xff\xff\xef?\xc4\xfcC\xc9\xe0j\x98\xbc\xfc\xff\xff\xff\xff\xff\xef?\xc4\xfcC\xc9\xe0j\x98\xbc\xfc\xff\xff\xff\xff\xff\xef?\xc4\xfcC\xc9\xe0j\x98\xbc\xfc\xff\xff\xff\xff\xff\xef?\xc4\xfcC\xc9\xe0j\x98\xbc\xfc\xff\xff\xff\xff\xff\xef?\xc4\xfcC\xc9\xe0j\x98\xbc\xfc\xff\xff\xff\xff\xff\xef?\xc4\xfcC\xc9\xe0j\x98\xbc\xfc\xff\xff\xff\xff\xff\xef?\xc4\xfcC\xc9\xe0j\x98\xbc\xfc\xff\xff\xff\xff\xff\xef?\xc4\xfcC\xc9\xe0j\x98\xbc\xfc\xff\xff\xff\xff\xff\xef?\xc4\xfcC\xc9\xe0j\x98\xbc\xfc\xff\xff\xff\xff\xff\xef?\xc4\xfcC\xc9\xe0j\x98\xbc\xfc\xff\xff\xff\xff\xff\xef?\xc4\xfcC\xc9\xe0j\x98\xbc\xfc\xff\xff\xff\xff\xff\xef?\xc4\xfcC\xc9\xe0j\x98\xbc\xfc\xff\xff\xff\xff\xff\xef?\xc4\xfcC\xc9\xe0j\x98\xbc\xfc\xff\xff\xff\xff\xff\xef?\xc4\xfcC\xc9\xe0j\x98\xbc\xfc\xff\xff\xff\xff\xff\xef?\xc4\xfcC\xc9\xe0j\x98\xbc\xfc\xff\xff\xff\xff\xff\xef?\xc4\xfcC\xc9\xe0j\x98\xbc\xfc\xff\xff\xff\xff\xff\xef?\xc4\xfcC\xc9\xe0j\x98\xbc\xfc\xff\xff\xff\xff\xff\xef?\xc4\xfcC\xc9\xe0j\x98\xbc\xfc\xff\xff\xff\xff\xff\xef?\xc4\xfcC\xc9\xe0j\x98\xbc\xfc\xff\xff\xff\xff\xff\xef?\xc4\xfcC\xc9\xe0j\x98\xbc\xfc\xff\xff\xff\xff\xff\xef?\xc4\xfcC\xc9\xe0j\x98\xbc\xfc\xff\xff\xff\xff\xff\xef?\xc4\xfcC\xc9\xe0j\x98\xbc\xfc\xff\xff\xff\xff\xff\xef?\xc4\xfcC\xc9\xe0j\x98\xbc\xfc\xff\xff\xff\xff\xff\xef?\xc4\xfcC\xc9\xe0j\x98\xbc\xfc\xff\xff\xff\xff\xff\xef?\xc4\xfcC\xc9\xe0j\x98\xbc\xfc\xff\xff\xff\xff\xff\xef?\xc4\xfcC\xc9\xe0j\x98\xbc\xfc\xff\xff\xff\xff\xff\xef?\xc4\xfcC\xc9\xe0j\x98\xbc\xfc\xff\xff\xff\xff\xff\xef?\xc4\xfcC\xc9\xe0j\x98\xbc\xfc\xff\xff\xff\xff\xff\xef?\xc4\xfcC\xc9\xe0j\x98\xbc\xfc\xff\xff\xff\xff\xff\xef?\xc4\xfcC\xc9\xe0j\x98\xbc\xfc\xff\xff\xff\xff\xff\xef?\xc4\xfcC\xc9\xe0j\x98\xbc\xfc\xff\xff\xff\xff\xff\xef?\xc4\xfcC\xc9\xe0j\x98\xbc\xfc\xff\xff\xff\xff\xff\xef?\xc4\xfcC\xc9\xe0j\x98\xbc\xfc\xff\xff\xff\xff\xff\xef?\xc4\xfcC\xc9\xe0j\x98\xbc\xfc\xff\xff\xff\xff\xff\xef?\xc4\xfcC\xc9\xe0j\x98\xbc\xfc\xff\xff\xff\xff\xff\xef?\xc4\xfcC\xc9\xe0j\x98\xbc\xfc\xff\xff\xff\xff\xff\xef?\xc4\xfcC\xc9\xe0j\x98\xbc\xfc\xff\xff\xff\xff\xff\xef?\xc4\xfcC\xc9\xe0j\x98\xbc\xfc\xff\xff\xff\xff\xff\xef?\xc4\xfcC\xc9\xe0j\x98\xbc\xfc\xff\xff\xff\xff\xff\xef?\xc4\xfcC\xc9\xe0j\x98\xbc\xfc\xff\xff\xff\xff\xff\xef?\xc4\xfcC\xc9\xe0j\x98\xbc\xfc\xff\xff\xff\xff\xff\xef?\xc4\xfcC\xc9\xe0j\x98\xbc\xfc\xff\xff\xff\xff\xff\xef?\xc4\xfcC\xc9\xe0j\x98\xbc\xfc\xff\xff\xff\xff\xff\xef?\xc4\xfcC\xc9\xe0j\x98\xbc\xfc\xff\xff\xff\xff\xff\xef?\xc4\xfcC\xc9\xe0j\x98\xbc\xfc\xff\xff\xff\xff\xff\xef?'
p197
tp198
bag2
(g3
(I0
tp199
g5
tp200
Rp201
(I1
(I2
I249
tp202
g12
I01
S'\xc4\xfcC\xc9\xe0j\x98\xbc\xfc\xff\xff\xff\xff\xff\xef?\xc4\xfcC\xc9\xe0j\x98\xbc\xfc\xff\xff\xff\xff\xff\xef?\xc4\xfcC\xc9\xe0j\x98\xbc\xfc\xff\xff\xff\xff\xff\xef?\xc4\xfcC\xc9\xe0j\x98\xbc\xfc\xff\xff\xff\xff\xff\xef?\xc4\xfcC\xc9\xe0j\x98\xbc\xfc\xff\xff\xff\xff\xff\xef?\xc4\xfcC\xc9\xe0j\x98\xbc\xfc\xff\xff\xff\xff\xff\xef?\xc4\xfcC\xc9\xe0j\x98\xbc\xfc\xff\xff\xff\xff\xff\xef?\xc4\xfcC\xc9\xe0j\x98\xbc\xfc\xff\xff\xff\xff\xff\xef?\xc4\xfcC\xc9\xe0j\x98\xbc\xfc\xff\xff\xff\xff\xff\xef?\xc4\xfcC\xc9\xe0j\x98\xbc\xfc\xff\xff\xff\xff\xff\xef?\xc4\xfcC\xc9\xe0j\x98\xbc\xfc\xff\xff\xff\xff\xff\xef?\xc4\xfcC\xc9\xe0j\x98\xbc\xfc\xff\xff\xff\xff\xff\xef?\xc4\xfcC\xc9\xe0j\x98\xbc\xfc\xff\xff\xff\xff\xff\xef?\xc4\xfcC\xc9\xe0j\x98\xbc\xfc\xff\xff\xff\xff\xff\xef?\xc4\xfcC\xc9\xe0j\x98\xbc\xfc\xff\xff\xff\xff\xff\xef?\xc4\xfcC\xc9\xe0j\x98\xbc\xfc\xff\xff\xff\xff\xff\xef?\xc4\xfcC\xc9\xe0j\x98\xbc\xfc\xff\xff\xff\xff\xff\xef?\xc4\xfcC\xc9\xe0j\x98\xbc\xfc\xff\xff\xff\xff\xff\xef?\xc4\xfcC\xc9\xe0j\x98\xbc\xfc\xff\xff\xff\xff\xff\xef?\xc4\xfcC\xc9\xe0j\x98\xbc\xfc\xff\xff\xff\xff\xff\xef?\xc4\xfcC\xc9\xe0j\x98\xbc\xfc\xff\xff\xff\xff\xff\xef?\xc4\xfcC\xc9\xe0j\x98\xbc\xfc\xff\xff\xff\xff\xff\xef?\xc4\xfcC\xc9\xe0j\x98\xbc\xfc\xff\xff\xff\xff\xff\xef?\xc4\xfcC\xc9\xe0j\x98\xbc\xfc\xff\xff\xff\xff\xff\xef?\xc4\xfcC\xc9\xe0j\x98\xbc\xfc\xff\xff\xff\xff\xff\xef?\xc4\xfcC\xc9\xe0j\x98\xbc\xfc\xff\xff\xff\xff\xff\xef?\xc4\xfcC\xc9\xe0j\x98\xbc\xfc\xff\xff\xff\xff\xff\xef?\xc4\xfcC\xc9\xe0j\x98\xbc\xfc\xff\xff\xff\xff\xff\xef?\xc4\xfcC\xc9\xe0j\x98\xbc\xfc\xff\xff\xff\xff\xff\xef?\xc4\xfcC\xc9\xe0j\x98\xbc\xfc\xff\xff\xff\xff\xff\xef?\xc4\xfcC\xc9\xe0j\x98\xbc\xfc\xff\xff\xff\xff\xff\xef?\xc4\xfcC\xc9\xe0j\x98\xbc\xfc\xff\xff\xff\xff\xff\xef?\xc4\xfcC\xc9\xe0j\x98\xbc\xfc\xff\xff\xff\xff\xff\xef?\xc4\xfcC\xc9\xe0j\x98\xbc\xfc\xff\xff\xff\xff\xff\xef?\xc4\xfcC\xc9\xe0j\x98\xbc\xfc\xff\xff\xff\xff\xff\xef?\xc4\xfcC\xc9\xe0j\x98\xbc\xfc\xff\xff\xff\xff\xff\xef?\xc4\xfcC\xc9\xe0j\x98\xbc\xfc\xff\xff\xff\xff\xff\xef?\xc4\xfcC\xc9\xe0j\x98\xbc\xfc\xff\xff\xff\xff\xff\xef?\xc4\xfcC\xc9\xe0j\x98\xbc\xfc\xff\xff\xff\xff\xff\xef?\xc4\xfcC\xc9\xe0j\x98\xbc\xfc\xff\xff\xff\xff\xff\xef?\xc4\xfcC\xc9\xe0j\x98\xbc\xfc\xff\xff\xff\xff\xff\xef?\xc4\xfcC\xc9\xe0j\x98\xbc\xfc\xff\xff\xff\xff\xff\xef?\xc4\xfcC\xc9\xe0j\x98\xbc\xfc\xff\xff\xff\xff\xff\xef?\xc4\xfcC\xc9\xe0j\x98\xbc\xfc\xff\xff\xff\xff\xff\xef?\xc4\xfcC\xc9\xe0j\x98\xbc\xfc\xff\xff\xff\xff\xff\xef?\xc4\xfcC\xc9\xe0j\x98\xbc\xfc\xff\xff\xff\xff\xff\xef?\xc4\xfcC\xc9\xe0j\x98\xbc\xfc\xff\xff\xff\xff\xff\xef?\xc4\xfcC\xc9\xe0j\x98\xbc\xfc\xff\xff\xff\xff\xff\xef?\xc4\xfcC\xc9\xe0j\x98\xbc\xfc\xff\xff\xff\xff\xff\xef?\xc4\xfcC\xc9\xe0j\x98\xbc\xfc\xff\xff\xff\xff\xff\xef?\xc4\xfcC\xc9\xe0j\x98\xbc\xfc\xff\xff\xff\xff\xff\xef?\xc4\xfcC\xc9\xe0j\x98\xbc\xfc\xff\xff\xff\xff\xff\xef?\xc4\xfcC\xc9\xe0j\x98\xbc\xfc\xff\xff\xff\xff\xff\xef?\xc4\xfcC\xc9\xe0j\x98\xbc\xfc\xff\xff\xff\xff\xff\xef?\xc4\xfcC\xc9\xe0j\x98\xbc\xfc\xff\xff\xff\xff\xff\xef?\xc4\xfcC\xc9\xe0j\x98\xbc\xfc\xff\xff\xff\xff\xff\xef?\xc4\xfcC\xc9\xe0j\x98\xbc\xfc\xff\xff\xff\xff\xff\xef?\xc4\xfcC\xc9\xe0j\x98\xbc\xfc\xff\xff\xff\xff\xff\xef?\xc4\xfcC\xc9\xe0j\x98\xbc\xfc\xff\xff\xff\xff\xff\xef?\xc4\xfcC\xc9\xe0j\x98\xbc\xfc\xff\xff\xff\xff\xff\xef?\xc4\xfcC\xc9\xe0j\x98\xbc\xfc\xff\xff\xff\xff\xff\xef?\xc4\xfcC\xc9\xe0j\x98\xbc\xfc\xff\xff\xff\xff\xff\xef?\xc4\xfcC\xc9\xe0j\x98\xbc\xfc\xff\xff\xff\xff\xff\xef?\xc4\xfcC\xc9\xe0j\x98\xbc\xfc\xff\xff\xff\xff\xff\xef?\xc4\xfcC\xc9\xe0j\x98\xbc\xfc\xff\xff\xff\xff\xff\xef?\xc4\xfcC\xc9\xe0j\x98\xbc\xfc\xff\xff\xff\xff\xff\xef?\xc4\xfcC\xc9\xe0j\x98\xbc\xfc\xff\xff\xff\xff\xff\xef?\xc4\xfcC\xc9\xe0j\x98\xbc\xfc\xff\xff\xff\xff\xff\xef?\xc4\xfcC\xc9\xe0j\x98\xbc\xfc\xff\xff\xff\xff\xff\xef?\xc4\xfcC\xc9\xe0j\x98\xbc\xfc\xff\xff\xff\xff\xff\xef?\xc4\xfcC\xc9\xe0j\x98\xbc\xfc\xff\xff\xff\xff\xff\xef?\xc4\xfcC\xc9\xe0j\x98\xbc\xfc\xff\xff\xff\xff\xff\xef?\xc4\xfcC\xc9\xe0j\x98\xbc\xfc\xff\xff\xff\xff\xff\xef?\xc4\xfcC\xc9\xe0j\x98\xbc\xfc\xff\xff\xff\xff\xff\xef?\xc4\xfcC\xc9\xe0j\x98\xbc\xfc\xff\xff\xff\xff\xff\xef?\xc4\xfcC\xc9\xe0j\x98\xbc\xfc\xff\xff\xff\xff\xff\xef?\xc4\xfcC\xc9\xe0j\x98\xbc\xfc\xff\xff\xff\xff\xff\xef?\xc4\xfcC\xc9\xe0j\x98\xbc\xfc\xff\xff\xff\xff\xff\xef?\xc4\xfcC\xc9\xe0j\x98\xbc\xfc\xff\xff\xff\xff\xff\xef?\xc4\xfcC\xc9\xe0j\x98\xbc\xfc\xff\xff\xff\xff\xff\xef?\xc4\xfcC\xc9\xe0j\x98\xbc\xfc\xff\xff\xff\xff\xff\xef?\xc4\xfcC\xc9\xe0j\x98\xbc\xfc\xff\xff\xff\xff\xff\xef?\xc4\xfcC\xc9\xe0j\x98\xbc\xfc\xff\xff\xff\xff\xff\xef?\xc4\xfcC\xc9\xe0j\x98\xbc\xfc\xff\xff\xff\xff\xff\xef?\xc4\xfcC\xc9\xe0j\x98\xbc\xfc\xff\xff\xff\xff\xff\xef?\xc4\xfcC\xc9\xe0j\x98\xbc\xfc\xff\xff\xff\xff\xff\xef?\xc4\xfcC\xc9\xe0j\x98\xbc\xfc\xff\xff\xff\xff\xff\xef?\xc4\xfcC\xc9\xe0j\x98\xbc\xfc\xff\xff\xff\xff\xff\xef?\xc4\xfcC\xc9\xe0j\x98\xbc\xfc\xff\xff\xff\xff\xff\xef?\xc4\xfcC\xc9\xe0j\x98\xbc\xfc\xff\xff\xff\xff\xff\xef?\xc4\xfcC\xc9\xe0j\x98\xbc\xfc\xff\xff\xff\xff\xff\xef?\xc4\xfcC\xc9\xe0j\x98\xbc\xfc\xff\xff\xff\xff\xff\xef?\xc4\xfcC\xc9\xe0j\x98\xbc\xfc\xff\xff\xff\xff\xff\xef?\xc4\xfcC\xc9\xe0j\x98\xbc\xfc\xff\xff\xff\xff\xff\xef?\xc4\xfcC\xc9\xe0j\x98\xbc\xfc\xff\xff\xff\xff\xff\xef?\xc4\xfcC\xc9\xe0j\x98\xbc\xfc\xff\xff\xff\xff\xff\xef?\xc4\xfcC\xc9\xe0j\x98\xbc\xfc\xff\xff\xff\xff\xff\xef?\xc4\xfcC\xc9\xe0j\x98\xbc\xfc\xff\xff\xff\xff\xff\xef?\xc4\xfcC\xc9\xe0j\x98\xbc\xfc\xff\xff\xff\xff\xff\xef?\xc4\xfcC\xc9\xe0j\x98\xbc\xfc\xff\xff\xff\xff\xff\xef?\xc4\xfcC\xc9\xe0j\x98\xbc\xfc\xff\xff\xff\xff\xff\xef?\xc4\xfcC\xc9\xe0j\x98\xbc\xfc\xff\xff\xff\xff\xff\xef?\xc4\xfcC\xc9\xe0j\x98\xbc\xfc\xff\xff\xff\xff\xff\xef?\xc4\xfcC\xc9\xe0j\x98\xbc\xfc\xff\xff\xff\xff\xff\xef?\xc4\xfcC\xc9\xe0j\x98\xbc\xfc\xff\xff\xff\xff\xff\xef?\xc4\xfcC\xc9\xe0j\x98\xbc\xfc\xff\xff\xff\xff\xff\xef?\xc4\xfcC\xc9\xe0j\x98\xbc\xfc\xff\xff\xff\xff\xff\xef?\xc4\xfcC\xc9\xe0j\x98\xbc\xfc\xff\xff\xff\xff\xff\xef?\xc4\xfcC\xc9\xe0j\x98\xbc\xfc\xff\xff\xff\xff\xff\xef?\xc4\xfcC\xc9\xe0j\x98\xbc\xfc\xff\xff\xff\xff\xff\xef?\xc4\xfcC\xc9\xe0j\x98\xbc\xfc\xff\xff\xff\xff\xff\xef?\xc4\xfcC\xc9\xe0j\x98\xbc\xfc\xff\xff\xff\xff\xff\xef?\xc4\xfcC\xc9\xe0j\x98\xbc\xfc\xff\xff\xff\xff\xff\xef?\xc4\xfcC\xc9\xe0j\x98\xbc\xfc\xff\xff\xff\xff\xff\xef?\xc4\xfcC\xc9\xe0j\x98\xbc\xfc\xff\xff\xff\xff\xff\xef?\xc4\xfcC\xc9\xe0j\x98\xbc\xfc\xff\xff\xff\xff\xff\xef?\xc4\xfcC\xc9\xe0j\x98\xbc\xfc\xff\xff\xff\xff\xff\xef?\xc4\xfcC\xc9\xe0j\x98\xbc\xfc\xff\xff\xff\xff\xff\xef?\xc4\xfcC\xc9\xe0j\x98\xbc\xfc\xff\xff\xff\xff\xff\xef?\xc4\xfcC\xc9\xe0j\x98\xbc\xfc\xff\xff\xff\xff\xff\xef?\xc4\xfcC\xc9\xe0j\x98\xbc\xfc\xff\xff\xff\xff\xff\xef?\xc4\xfcC\xc9\xe0j\x98\xbc\xfc\xff\xff\xff\xff\xff\xef?\xc4\xfcC\xc9\xe0j\x98\xbc\xfc\xff\xff\xff\xff\xff\xef?\xc4\xfcC\xc9\xe0j\x98\xbc\xfc\xff\xff\xff\xff\xff\xef?\xc4\xfcC\xc9\xe0j\x98\xbc\xfc\xff\xff\xff\xff\xff\xef?\xc4\xfcC\xc9\xe0j\x98\xbc\xfc\xff\xff\xff\xff\xff\xef?\xc4\xfcC\xc9\xe0j\x98\xbc\xfc\xff\xff\xff\xff\xff\xef?\xc4\xfcC\xc9\xe0j\x98\xbc\xfc\xff\xff\xff\xff\xff\xef?\xc4\xfcC\xc9\xe0j\x98\xbc\xfc\xff\xff\xff\xff\xff\xef?\xc4\xfcC\xc9\xe0j\x98\xbc\xfc\xff\xff\xff\xff\xff\xef?\xc4\xfcC\xc9\xe0j\x98\xbc\xfc\xff\xff\xff\xff\xff\xef?\xc4\xfcC\xc9\xe0j\x98\xbc\xfc\xff\xff\xff\xff\xff\xef?\xc4\xfcC\xc9\xe0j\x98\xbc\xfc\xff\xff\xff\xff\xff\xef?\xc4\xfcC\xc9\xe0j\x98\xbc\xfc\xff\xff\xff\xff\xff\xef?\xc4\xfcC\xc9\xe0j\x98\xbc\xfc\xff\xff\xff\xff\xff\xef?\xc4\xfcC\xc9\xe0j\x98\xbc\xfc\xff\xff\xff\xff\xff\xef?\xc4\xfcC\xc9\xe0j\x98\xbc\xfc\xff\xff\xff\xff\xff\xef?\xc4\xfcC\xc9\xe0j\x98\xbc\xfc\xff\xff\xff\xff\xff\xef?\xc4\xfcC\xc9\xe0j\x98\xbc\xfc\xff\xff\xff\xff\xff\xef?\xc4\xfcC\xc9\xe0j\x98\xbc\xfc\xff\xff\xff\xff\xff\xef?\xc4\xfcC\xc9\xe0j\x98\xbc\xfc\xff\xff\xff\xff\xff\xef?\xc4\xfcC\xc9\xe0j\x98\xbc\xfc\xff\xff\xff\xff\xff\xef?\xc4\xfcC\xc9\xe0j\x98\xbc\xfc\xff\xff\xff\xff\xff\xef?\xc4\xfcC\xc9\xe0j\x98\xbc\xfc\xff\xff\xff\xff\xff\xef?\xc4\xfcC\xc9\xe0j\x98\xbc\xfc\xff\xff\xff\xff\xff\xef?\xc4\xfcC\xc9\xe0j\x98\xbc\xfc\xff\xff\xff\xff\xff\xef?\xc4\xfcC\xc9\xe0j\x98\xbc\xfc\xff\xff\xff\xff\xff\xef?\xc4\xfcC\xc9\xe0j\x98\xbc\xfc\xff\xff\xff\xff\xff\xef?\xc4\xfcC\xc9\xe0j\x98\xbc\xfc\xff\xff\xff\xff\xff\xef?\xc4\xfcC\xc9\xe0j\x98\xbc\xfc\xff\xff\xff\xff\xff\xef?\xc4\xfcC\xc9\xe0j\x98\xbc\xfc\xff\xff\xff\xff\xff\xef?\xc4\xfcC\xc9\xe0j\x98\xbc\xfc\xff\xff\xff\xff\xff\xef?\xc4\xfcC\xc9\xe0j\x98\xbc\xfc\xff\xff\xff\xff\xff\xef?\xc4\xfcC\xc9\xe0j\x98\xbc\xfc\xff\xff\xff\xff\xff\xef?\xc4\xfcC\xc9\xe0j\x98\xbc\xfc\xff\xff\xff\xff\xff\xef?\xc4\xfcC\xc9\xe0j\x98\xbc\xfc\xff\xff\xff\xff\xff\xef?\xc4\xfcC\xc9\xe0j\x98\xbc\xfc\xff\xff\xff\xff\xff\xef?\xc4\xfcC\xc9\xe0j\x98\xbc\xfc\xff\xff\xff\xff\xff\xef?\xc4\xfcC\xc9\xe0j\x98\xbc\xfc\xff\xff\xff\xff\xff\xef?\xc4\xfcC\xc9\xe0j\x98\xbc\xfc\xff\xff\xff\xff\xff\xef?\xc4\xfcC\xc9\xe0j\x98\xbc\xfc\xff\xff\xff\xff\xff\xef?\xc4\xfcC\xc9\xe0j\x98\xbc\xfc\xff\xff\xff\xff\xff\xef?\xc4\xfcC\xc9\xe0j\x98\xbc\xfc\xff\xff\xff\xff\xff\xef?\xc4\xfcC\xc9\xe0j\x98\xbc\xfc\xff\xff\xff\xff\xff\xef?\xc4\xfcC\xc9\xe0j\x98\xbc\xfc\xff\xff\xff\xff\xff\xef?\xc4\xfcC\xc9\xe0j\x98\xbc\xfc\xff\xff\xff\xff\xff\xef?\xc4\xfcC\xc9\xe0j\x98\xbc\xfc\xff\xff\xff\xff\xff\xef?\xc4\xfcC\xc9\xe0j\x98\xbc\xfc\xff\xff\xff\xff\xff\xef?\xc4\xfcC\xc9\xe0j\x98\xbc\xfc\xff\xff\xff\xff\xff\xef?\xc4\xfcC\xc9\xe0j\x98\xbc\xfc\xff\xff\xff\xff\xff\xef?\xc4\xfcC\xc9\xe0j\x98\xbc\xfc\xff\xff\xff\xff\xff\xef?\xc4\xfcC\xc9\xe0j\x98\xbc\xfc\xff\xff\xff\xff\xff\xef?\xc4\xfcC\xc9\xe0j\x98\xbc\xfc\xff\xff\xff\xff\xff\xef?\xc4\xfcC\xc9\xe0j\x98\xbc\xfc\xff\xff\xff\xff\xff\xef?\xc4\xfcC\xc9\xe0j\x98\xbc\xfc\xff\xff\xff\xff\xff\xef?\xc4\xfcC\xc9\xe0j\x98\xbc\xfc\xff\xff\xff\xff\xff\xef?\xc4\xfcC\xc9\xe0j\x98\xbc\xfc\xff\xff\xff\xff\xff\xef?\xc4\xfcC\xc9\xe0j\x98\xbc\xfc\xff\xff\xff\xff\xff\xef?\xc4\xfcC\xc9\xe0j\x98\xbc\xfc\xff\xff\xff\xff\xff\xef?\xc4\xfcC\xc9\xe0j\x98\xbc\xfc\xff\xff\xff\xff\xff\xef?\xc4\xfcC\xc9\xe0j\x98\xbc\xfc\xff\xff\xff\xff\xff\xef?\xc4\xfcC\xc9\xe0j\x98\xbc\xfc\xff\xff\xff\xff\xff\xef?\xc4\xfcC\xc9\xe0j\x98\xbc\xfc\xff\xff\xff\xff\xff\xef?\xc4\xfcC\xc9\xe0j\x98\xbc\xfc\xff\xff\xff\xff\xff\xef?\xc4\xfcC\xc9\xe0j\x98\xbc\xfc\xff\xff\xff\xff\xff\xef?\xc4\xfcC\xc9\xe0j\x98\xbc\xfc\xff\xff\xff\xff\xff\xef?\xc4\xfcC\xc9\xe0j\x98\xbc\xfc\xff\xff\xff\xff\xff\xef?\xc4\xfcC\xc9\xe0j\x98\xbc\xfc\xff\xff\xff\xff\xff\xef?\xc4\xfcC\xc9\xe0j\x98\xbc\xfc\xff\xff\xff\xff\xff\xef?\xc4\xfcC\xc9\xe0j\x98\xbc\xfc\xff\xff\xff\xff\xff\xef?\xc4\xfcC\xc9\xe0j\x98\xbc\xfc\xff\xff\xff\xff\xff\xef?\xc4\xfcC\xc9\xe0j\x98\xbc\xfc\xff\xff\xff\xff\xff\xef?\xc4\xfcC\xc9\xe0j\x98\xbc\xfc\xff\xff\xff\xff\xff\xef?\xc4\xfcC\xc9\xe0j\x98\xbc\xfc\xff\xff\xff\xff\xff\xef?\xc4\xfcC\xc9\xe0j\x98\xbc\xfc\xff\xff\xff\xff\xff\xef?\xc4\xfcC\xc9\xe0j\x98\xbc\xfc\xff\xff\xff\xff\xff\xef?\xc4\xfcC\xc9\xe0j\x98\xbc\xfc\xff\xff\xff\xff\xff\xef?\xc4\xfcC\xc9\xe0j\x98\xbc\xfc\xff\xff\xff\xff\xff\xef?\xc4\xfcC\xc9\xe0j\x98\xbc\xfc\xff\xff\xff\xff\xff\xef?\xc4\xfcC\xc9\xe0j\x98\xbc\xfc\xff\xff\xff\xff\xff\xef?\xc4\xfcC\xc9\xe0j\x98\xbc\xfc\xff\xff\xff\xff\xff\xef?\xc4\xfcC\xc9\xe0j\x98\xbc\xfc\xff\xff\xff\xff\xff\xef?\xc4\xfcC\xc9\xe0j\x98\xbc\xfc\xff\xff\xff\xff\xff\xef?\xc4\xfcC\xc9\xe0j\x98\xbc\xfc\xff\xff\xff\xff\xff\xef?\xc4\xfcC\xc9\xe0j\x98\xbc\xfc\xff\xff\xff\xff\xff\xef?\xc4\xfcC\xc9\xe0j\x98\xbc\xfc\xff\xff\xff\xff\xff\xef?\xc4\xfcC\xc9\xe0j\x98\xbc\xfc\xff\xff\xff\xff\xff\xef?\xc4\xfcC\xc9\xe0j\x98\xbc\xfc\xff\xff\xff\xff\xff\xef?\xc4\xfcC\xc9\xe0j\x98\xbc\xfc\xff\xff\xff\xff\xff\xef?\xc4\xfcC\xc9\xe0j\x98\xbc\xfc\xff\xff\xff\xff\xff\xef?\xc4\xfcC\xc9\xe0j\x98\xbc\xfc\xff\xff\xff\xff\xff\xef?\xc4\xfcC\xc9\xe0j\x98\xbc\xfc\xff\xff\xff\xff\xff\xef?\xc4\xfcC\xc9\xe0j\x98\xbc\xfc\xff\xff\xff\xff\xff\xef?\xc4\xfcC\xc9\xe0j\x98\xbc\xfc\xff\xff\xff\xff\xff\xef?\xc4\xfcC\xc9\xe0j\x98\xbc\xfc\xff\xff\xff\xff\xff\xef?\xc4\xfcC\xc9\xe0j\x98\xbc\xfc\xff\xff\xff\xff\xff\xef?\xc4\xfcC\xc9\xe0j\x98\xbc\xfc\xff\xff\xff\xff\xff\xef?\xc4\xfcC\xc9\xe0j\x98\xbc\xfc\xff\xff\xff\xff\xff\xef?\xc4\xfcC\xc9\xe0j\x98\xbc\xfc\xff\xff\xff\xff\xff\xef?\xc4\xfcC\xc9\xe0j\x98\xbc\xfc\xff\xff\xff\xff\xff\xef?\xc4\xfcC\xc9\xe0j\x98\xbc\xfc\xff\xff\xff\xff\xff\xef?\xc4\xfcC\xc9\xe0j\x98\xbc\xfc\xff\xff\xff\xff\xff\xef?\xc4\xfcC\xc9\xe0j\x98\xbc\xfc\xff\xff\xff\xff\xff\xef?\xc4\xfcC\xc9\xe0j\x98\xbc\xfc\xff\xff\xff\xff\xff\xef?\xc4\xfcC\xc9\xe0j\x98\xbc\xfc\xff\xff\xff\xff\xff\xef?\xc4\xfcC\xc9\xe0j\x98\xbc\xfc\xff\xff\xff\xff\xff\xef?\xc4\xfcC\xc9\xe0j\x98\xbc\xfc\xff\xff\xff\xff\xff\xef?\xc4\xfcC\xc9\xe0j\x98\xbc\xfc\xff\xff\xff\xff\xff\xef?\xc4\xfcC\xc9\xe0j\x98\xbc\xfc\xff\xff\xff\xff\xff\xef?\xc4\xfcC\xc9\xe0j\x98\xbc\xfc\xff\xff\xff\xff\xff\xef?\xc4\xfcC\xc9\xe0j\x98\xbc\xfc\xff\xff\xff\xff\xff\xef?\xc4\xfcC\xc9\xe0j\x98\xbc\xfc\xff\xff\xff\xff\xff\xef?\xc4\xfcC\xc9\xe0j\x98\xbc\xfc\xff\xff\xff\xff\xff\xef?\xc4\xfcC\xc9\xe0j\x98\xbc\xfc\xff\xff\xff\xff\xff\xef?\xc4\xfcC\xc9\xe0j\x98\xbc\xfc\xff\xff\xff\xff\xff\xef?\xc4\xfcC\xc9\xe0j\x98\xbc\xfc\xff\xff\xff\xff\xff\xef?\xc4\xfcC\xc9\xe0j\x98\xbc\xfc\xff\xff\xff\xff\xff\xef?\xc4\xfcC\xc9\xe0j\x98\xbc\xfc\xff\xff\xff\xff\xff\xef?\xc4\xfcC\xc9\xe0j\x98\xbc\xfc\xff\xff\xff\xff\xff\xef?\xc4\xfcC\xc9\xe0j\x98\xbc\xfc\xff\xff\xff\xff\xff\xef?\xc4\xfcC\xc9\xe0j\x98\xbc\xfc\xff\xff\xff\xff\xff\xef?\xc4\xfcC\xc9\xe0j\x98\xbc\xfc\xff\xff\xff\xff\xff\xef?\xc4\xfcC\xc9\xe0j\x98\xbc\xfc\xff\xff\xff\xff\xff\xef?\xc4\xfcC\xc9\xe0j\x98\xbc\xfc\xff\xff\xff\xff\xff\xef?\xc4\xfcC\xc9\xe0j\x98\xbc\xfc\xff\xff\xff\xff\xff\xef?\xc4\xfcC\xc9\xe0j\x98\xbc\xfc\xff\xff\xff\xff\xff\xef?\xc4\xfcC\xc9\xe0j\x98\xbc\xfc\xff\xff\xff\xff\xff\xef?\xc4\xfcC\xc9\xe0j\x98\xbc\xfc\xff\xff\xff\xff\xff\xef?\xc4\xfcC\xc9\xe0j\x98\xbc\xfc\xff\xff\xff\xff\xff\xef?'
p203
tp204
bag2
(g3
(I0
tp205
g5
tp206
Rp207
(I1
(I2
I237
tp208
g12
I01
S'\xc4\xfcC\xc9\xe0j\x98\xbc\xfc\xff\xff\xff\xff\xff\xef?\xc4\xfcC\xc9\xe0j\x98\xbc\xfc\xff\xff\xff\xff\xff\xef?\xc4\xfcC\xc9\xe0j\x98\xbc\xfc\xff\xff\xff\xff\xff\xef?\xc4\xfcC\xc9\xe0j\x98\xbc\xfc\xff\xff\xff\xff\xff\xef?\xc4\xfcC\xc9\xe0j\x98\xbc\xfc\xff\xff\xff\xff\xff\xef?\xc4\xfcC\xc9\xe0j\x98\xbc\xfc\xff\xff\xff\xff\xff\xef?\xc4\xfcC\xc9\xe0j\x98\xbc\xfc\xff\xff\xff\xff\xff\xef?\xc4\xfcC\xc9\xe0j\x98\xbc\xfc\xff\xff\xff\xff\xff\xef?\xc4\xfcC\xc9\xe0j\x98\xbc\xfc\xff\xff\xff\xff\xff\xef?\xc4\xfcC\xc9\xe0j\x98\xbc\xfc\xff\xff\xff\xff\xff\xef?\xc4\xfcC\xc9\xe0j\x98\xbc\xfc\xff\xff\xff\xff\xff\xef?\xc4\xfcC\xc9\xe0j\x98\xbc\xfc\xff\xff\xff\xff\xff\xef?\xc4\xfcC\xc9\xe0j\x98\xbc\xfc\xff\xff\xff\xff\xff\xef?\xc4\xfcC\xc9\xe0j\x98\xbc\xfc\xff\xff\xff\xff\xff\xef?\xc4\xfcC\xc9\xe0j\x98\xbc\xfc\xff\xff\xff\xff\xff\xef?\xc4\xfcC\xc9\xe0j\x98\xbc\xfc\xff\xff\xff\xff\xff\xef?\xc4\xfcC\xc9\xe0j\x98\xbc\xfc\xff\xff\xff\xff\xff\xef?\xc4\xfcC\xc9\xe0j\x98\xbc\xfc\xff\xff\xff\xff\xff\xef?\xc4\xfcC\xc9\xe0j\x98\xbc\xfc\xff\xff\xff\xff\xff\xef?\xc4\xfcC\xc9\xe0j\x98\xbc\xfc\xff\xff\xff\xff\xff\xef?\xc4\xfcC\xc9\xe0j\x98\xbc\xfc\xff\xff\xff\xff\xff\xef?\xc4\xfcC\xc9\xe0j\x98\xbc\xfc\xff\xff\xff\xff\xff\xef?\xc4\xfcC\xc9\xe0j\x98\xbc\xfc\xff\xff\xff\xff\xff\xef?\xc4\xfcC\xc9\xe0j\x98\xbc\xfc\xff\xff\xff\xff\xff\xef?\xc4\xfcC\xc9\xe0j\x98\xbc\xfc\xff\xff\xff\xff\xff\xef?\xc4\xfcC\xc9\xe0j\x98\xbc\xfc\xff\xff\xff\xff\xff\xef?\xc4\xfcC\xc9\xe0j\x98\xbc\xfc\xff\xff\xff\xff\xff\xef?\xc4\xfcC\xc9\xe0j\x98\xbc\xfc\xff\xff\xff\xff\xff\xef?\xc4\xfcC\xc9\xe0j\x98\xbc\xfc\xff\xff\xff\xff\xff\xef?\xc4\xfcC\xc9\xe0j\x98\xbc\xfc\xff\xff\xff\xff\xff\xef?\xc4\xfcC\xc9\xe0j\x98\xbc\xfc\xff\xff\xff\xff\xff\xef?\xc4\xfcC\xc9\xe0j\x98\xbc\xfc\xff\xff\xff\xff\xff\xef?\xc4\xfcC\xc9\xe0j\x98\xbc\xfc\xff\xff\xff\xff\xff\xef?\xc4\xfcC\xc9\xe0j\x98\xbc\xfc\xff\xff\xff\xff\xff\xef?\xc4\xfcC\xc9\xe0j\x98\xbc\xfc\xff\xff\xff\xff\xff\xef?\xc4\xfcC\xc9\xe0j\x98\xbc\xfc\xff\xff\xff\xff\xff\xef?\xc4\xfcC\xc9\xe0j\x98\xbc\xfc\xff\xff\xff\xff\xff\xef?\xc4\xfcC\xc9\xe0j\x98\xbc\xfc\xff\xff\xff\xff\xff\xef?\xc4\xfcC\xc9\xe0j\x98\xbc\xfc\xff\xff\xff\xff\xff\xef?\xc4\xfcC\xc9\xe0j\x98\xbc\xfc\xff\xff\xff\xff\xff\xef?\xc4\xfcC\xc9\xe0j\x98\xbc\xfc\xff\xff\xff\xff\xff\xef?\xc4\xfcC\xc9\xe0j\x98\xbc\xfc\xff\xff\xff\xff\xff\xef?\xc4\xfcC\xc9\xe0j\x98\xbc\xfc\xff\xff\xff\xff\xff\xef?\xc4\xfcC\xc9\xe0j\x98\xbc\xfc\xff\xff\xff\xff\xff\xef?\xc4\xfcC\xc9\xe0j\x98\xbc\xfc\xff\xff\xff\xff\xff\xef?\xc4\xfcC\xc9\xe0j\x98\xbc\xfc\xff\xff\xff\xff\xff\xef?\xc4\xfcC\xc9\xe0j\x98\xbc\xfc\xff\xff\xff\xff\xff\xef?\xc4\xfcC\xc9\xe0j\x98\xbc\xfc\xff\xff\xff\xff\xff\xef?\xc4\xfcC\xc9\xe0j\x98\xbc\xfc\xff\xff\xff\xff\xff\xef?\xc4\xfcC\xc9\xe0j\x98\xbc\xfc\xff\xff\xff\xff\xff\xef?\xc4\xfcC\xc9\xe0j\x98\xbc\xfc\xff\xff\xff\xff\xff\xef?\xc4\xfcC\xc9\xe0j\x98\xbc\xfc\xff\xff\xff\xff\xff\xef?\xc4\xfcC\xc9\xe0j\x98\xbc\xfc\xff\xff\xff\xff\xff\xef?\xc4\xfcC\xc9\xe0j\x98\xbc\xfc\xff\xff\xff\xff\xff\xef?\xc4\xfcC\xc9\xe0j\x98\xbc\xfc\xff\xff\xff\xff\xff\xef?\xc4\xfcC\xc9\xe0j\x98\xbc\xfc\xff\xff\xff\xff\xff\xef?\xc4\xfcC\xc9\xe0j\x98\xbc\xfc\xff\xff\xff\xff\xff\xef?\xc4\xfcC\xc9\xe0j\x98\xbc\xfc\xff\xff\xff\xff\xff\xef?\xc4\xfcC\xc9\xe0j\x98\xbc\xfc\xff\xff\xff\xff\xff\xef?\xc4\xfcC\xc9\xe0j\x98\xbc\xfc\xff\xff\xff\xff\xff\xef?\xc4\xfcC\xc9\xe0j\x98\xbc\xfc\xff\xff\xff\xff\xff\xef?\xc4\xfcC\xc9\xe0j\x98\xbc\xfc\xff\xff\xff\xff\xff\xef?\xc4\xfcC\xc9\xe0j\x98\xbc\xfc\xff\xff\xff\xff\xff\xef?\xc4\xfcC\xc9\xe0j\x98\xbc\xfc\xff\xff\xff\xff\xff\xef?\xc4\xfcC\xc9\xe0j\x98\xbc\xfc\xff\xff\xff\xff\xff\xef?\xc4\xfcC\xc9\xe0j\x98\xbc\xfc\xff\xff\xff\xff\xff\xef?\xc4\xfcC\xc9\xe0j\x98\xbc\xfc\xff\xff\xff\xff\xff\xef?\xc4\xfcC\xc9\xe0j\x98\xbc\xfc\xff\xff\xff\xff\xff\xef?\xc4\xfcC\xc9\xe0j\x98\xbc\xfc\xff\xff\xff\xff\xff\xef?\xc4\xfcC\xc9\xe0j\x98\xbc\xfc\xff\xff\xff\xff\xff\xef?\xc4\xfcC\xc9\xe0j\x98\xbc\xfc\xff\xff\xff\xff\xff\xef?\xc4\xfcC\xc9\xe0j\x98\xbc\xfc\xff\xff\xff\xff\xff\xef?\xc4\xfcC\xc9\xe0j\x98\xbc\xfc\xff\xff\xff\xff\xff\xef?\xc4\xfcC\xc9\xe0j\x98\xbc\xfc\xff\xff\xff\xff\xff\xef?\xc4\xfcC\xc9\xe0j\x98\xbc\xfc\xff\xff\xff\xff\xff\xef?\xc4\xfcC\xc9\xe0j\x98\xbc\xfc\xff\xff\xff\xff\xff\xef?\xc4\xfcC\xc9\xe0j\x98\xbc\xfc\xff\xff\xff\xff\xff\xef?\xc4\xfcC\xc9\xe0j\x98\xbc\xfc\xff\xff\xff\xff\xff\xef?\xc4\xfcC\xc9\xe0j\x98\xbc\xfc\xff\xff\xff\xff\xff\xef?\xc4\xfcC\xc9\xe0j\x98\xbc\xfc\xff\xff\xff\xff\xff\xef?\xc4\xfcC\xc9\xe0j\x98\xbc\xfc\xff\xff\xff\xff\xff\xef?\xc4\xfcC\xc9\xe0j\x98\xbc\xfc\xff\xff\xff\xff\xff\xef?\xc4\xfcC\xc9\xe0j\x98\xbc\xfc\xff\xff\xff\xff\xff\xef?\xc4\xfcC\xc9\xe0j\x98\xbc\xfc\xff\xff\xff\xff\xff\xef?\xc4\xfcC\xc9\xe0j\x98\xbc\xfc\xff\xff\xff\xff\xff\xef?\xc4\xfcC\xc9\xe0j\x98\xbc\xfc\xff\xff\xff\xff\xff\xef?\xc4\xfcC\xc9\xe0j\x98\xbc\xfc\xff\xff\xff\xff\xff\xef?\xc4\xfcC\xc9\xe0j\x98\xbc\xfc\xff\xff\xff\xff\xff\xef?\xc4\xfcC\xc9\xe0j\x98\xbc\xfc\xff\xff\xff\xff\xff\xef?\xc4\xfcC\xc9\xe0j\x98\xbc\xfc\xff\xff\xff\xff\xff\xef?\xc4\xfcC\xc9\xe0j\x98\xbc\xfc\xff\xff\xff\xff\xff\xef?\xc4\xfcC\xc9\xe0j\x98\xbc\xfc\xff\xff\xff\xff\xff\xef?\xc4\xfcC\xc9\xe0j\x98\xbc\xfc\xff\xff\xff\xff\xff\xef?\xc4\xfcC\xc9\xe0j\x98\xbc\xfc\xff\xff\xff\xff\xff\xef?\xc4\xfcC\xc9\xe0j\x98\xbc\xfc\xff\xff\xff\xff\xff\xef?\xc4\xfcC\xc9\xe0j\x98\xbc\xfc\xff\xff\xff\xff\xff\xef?\xc4\xfcC\xc9\xe0j\x98\xbc\xfc\xff\xff\xff\xff\xff\xef?\xc4\xfcC\xc9\xe0j\x98\xbc\xfc\xff\xff\xff\xff\xff\xef?\xc4\xfcC\xc9\xe0j\x98\xbc\xfc\xff\xff\xff\xff\xff\xef?\xc4\xfcC\xc9\xe0j\x98\xbc\xfc\xff\xff\xff\xff\xff\xef?\xc4\xfcC\xc9\xe0j\x98\xbc\xfc\xff\xff\xff\xff\xff\xef?\xc4\xfcC\xc9\xe0j\x98\xbc\xfc\xff\xff\xff\xff\xff\xef?\xc4\xfcC\xc9\xe0j\x98\xbc\xfc\xff\xff\xff\xff\xff\xef?\xc4\xfcC\xc9\xe0j\x98\xbc\xfc\xff\xff\xff\xff\xff\xef?\xc4\xfcC\xc9\xe0j\x98\xbc\xfc\xff\xff\xff\xff\xff\xef?\xc4\xfcC\xc9\xe0j\x98\xbc\xfc\xff\xff\xff\xff\xff\xef?\xc4\xfcC\xc9\xe0j\x98\xbc\xfc\xff\xff\xff\xff\xff\xef?\xc4\xfcC\xc9\xe0j\x98\xbc\xfc\xff\xff\xff\xff\xff\xef?\xc4\xfcC\xc9\xe0j\x98\xbc\xfc\xff\xff\xff\xff\xff\xef?\xc4\xfcC\xc9\xe0j\x98\xbc\xfc\xff\xff\xff\xff\xff\xef?\xc4\xfcC\xc9\xe0j\x98\xbc\xfc\xff\xff\xff\xff\xff\xef?\xc4\xfcC\xc9\xe0j\x98\xbc\xfc\xff\xff\xff\xff\xff\xef?\xc4\xfcC\xc9\xe0j\x98\xbc\xfc\xff\xff\xff\xff\xff\xef?\xc4\xfcC\xc9\xe0j\x98\xbc\xfc\xff\xff\xff\xff\xff\xef?\xc4\xfcC\xc9\xe0j\x98\xbc\xfc\xff\xff\xff\xff\xff\xef?\xc4\xfcC\xc9\xe0j\x98\xbc\xfc\xff\xff\xff\xff\xff\xef?\xc4\xfcC\xc9\xe0j\x98\xbc\xfc\xff\xff\xff\xff\xff\xef?\xc4\xfcC\xc9\xe0j\x98\xbc\xfc\xff\xff\xff\xff\xff\xef?\xc4\xfcC\xc9\xe0j\x98\xbc\xfc\xff\xff\xff\xff\xff\xef?\xc4\xfcC\xc9\xe0j\x98\xbc\xfc\xff\xff\xff\xff\xff\xef?\xc4\xfcC\xc9\xe0j\x98\xbc\xfc\xff\xff\xff\xff\xff\xef?\xc4\xfcC\xc9\xe0j\x98\xbc\xfc\xff\xff\xff\xff\xff\xef?\xc4\xfcC\xc9\xe0j\x98\xbc\xfc\xff\xff\xff\xff\xff\xef?\xc4\xfcC\xc9\xe0j\x98\xbc\xfc\xff\xff\xff\xff\xff\xef?\xc4\xfcC\xc9\xe0j\x98\xbc\xfc\xff\xff\xff\xff\xff\xef?\xc4\xfcC\xc9\xe0j\x98\xbc\xfc\xff\xff\xff\xff\xff\xef?\xc4\xfcC\xc9\xe0j\x98\xbc\xfc\xff\xff\xff\xff\xff\xef?\xc4\xfcC\xc9\xe0j\x98\xbc\xfc\xff\xff\xff\xff\xff\xef?\xc4\xfcC\xc9\xe0j\x98\xbc\xfc\xff\xff\xff\xff\xff\xef?\xc4\xfcC\xc9\xe0j\x98\xbc\xfc\xff\xff\xff\xff\xff\xef?\xc4\xfcC\xc9\xe0j\x98\xbc\xfc\xff\xff\xff\xff\xff\xef?\xc4\xfcC\xc9\xe0j\x98\xbc\xfc\xff\xff\xff\xff\xff\xef?\xc4\xfcC\xc9\xe0j\x98\xbc\xfc\xff\xff\xff\xff\xff\xef?\xc4\xfcC\xc9\xe0j\x98\xbc\xfc\xff\xff\xff\xff\xff\xef?\xc4\xfcC\xc9\xe0j\x98\xbc\xfc\xff\xff\xff\xff\xff\xef?\xc4\xfcC\xc9\xe0j\x98\xbc\xfc\xff\xff\xff\xff\xff\xef?\xc4\xfcC\xc9\xe0j\x98\xbc\xfc\xff\xff\xff\xff\xff\xef?\xc4\xfcC\xc9\xe0j\x98\xbc\xfc\xff\xff\xff\xff\xff\xef?\xc4\xfcC\xc9\xe0j\x98\xbc\xfc\xff\xff\xff\xff\xff\xef?\xc4\xfcC\xc9\xe0j\x98\xbc\xfc\xff\xff\xff\xff\xff\xef?\xc4\xfcC\xc9\xe0j\x98\xbc\xfc\xff\xff\xff\xff\xff\xef?\xc4\xfcC\xc9\xe0j\x98\xbc\xfc\xff\xff\xff\xff\xff\xef?\xc4\xfcC\xc9\xe0j\x98\xbc\xfc\xff\xff\xff\xff\xff\xef?\xc4\xfcC\xc9\xe0j\x98\xbc\xfc\xff\xff\xff\xff\xff\xef?\xc4\xfcC\xc9\xe0j\x98\xbc\xfc\xff\xff\xff\xff\xff\xef?\xc4\xfcC\xc9\xe0j\x98\xbc\xfc\xff\xff\xff\xff\xff\xef?\xc4\xfcC\xc9\xe0j\x98\xbc\xfc\xff\xff\xff\xff\xff\xef?\xc4\xfcC\xc9\xe0j\x98\xbc\xfc\xff\xff\xff\xff\xff\xef?\xc4\xfcC\xc9\xe0j\x98\xbc\xfc\xff\xff\xff\xff\xff\xef?\xc4\xfcC\xc9\xe0j\x98\xbc\xfc\xff\xff\xff\xff\xff\xef?\xc4\xfcC\xc9\xe0j\x98\xbc\xfc\xff\xff\xff\xff\xff\xef?\xc4\xfcC\xc9\xe0j\x98\xbc\xfc\xff\xff\xff\xff\xff\xef?\xc4\xfcC\xc9\xe0j\x98\xbc\xfc\xff\xff\xff\xff\xff\xef?\xc4\xfcC\xc9\xe0j\x98\xbc\xfc\xff\xff\xff\xff\xff\xef?\xc4\xfcC\xc9\xe0j\x98\xbc\xfc\xff\xff\xff\xff\xff\xef?\xc4\xfcC\xc9\xe0j\x98\xbc\xfc\xff\xff\xff\xff\xff\xef?\xc4\xfcC\xc9\xe0j\x98\xbc\xfc\xff\xff\xff\xff\xff\xef?\xc4\xfcC\xc9\xe0j\x98\xbc\xfc\xff\xff\xff\xff\xff\xef?\xc4\xfcC\xc9\xe0j\x98\xbc\xfc\xff\xff\xff\xff\xff\xef?\xc4\xfcC\xc9\xe0j\x98\xbc\xfc\xff\xff\xff\xff\xff\xef?\xc4\xfcC\xc9\xe0j\x98\xbc\xfc\xff\xff\xff\xff\xff\xef?\xc4\xfcC\xc9\xe0j\x98\xbc\xfc\xff\xff\xff\xff\xff\xef?\xc4\xfcC\xc9\xe0j\x98\xbc\xfc\xff\xff\xff\xff\xff\xef?\xc4\xfcC\xc9\xe0j\x98\xbc\xfc\xff\xff\xff\xff\xff\xef?\xc4\xfcC\xc9\xe0j\x98\xbc\xfc\xff\xff\xff\xff\xff\xef?\xc4\xfcC\xc9\xe0j\x98\xbc\xfc\xff\xff\xff\xff\xff\xef?\xc4\xfcC\xc9\xe0j\x98\xbc\xfc\xff\xff\xff\xff\xff\xef?\xc4\xfcC\xc9\xe0j\x98\xbc\xfc\xff\xff\xff\xff\xff\xef?\xc4\xfcC\xc9\xe0j\x98\xbc\xfc\xff\xff\xff\xff\xff\xef?\xc4\xfcC\xc9\xe0j\x98\xbc\xfc\xff\xff\xff\xff\xff\xef?\xc4\xfcC\xc9\xe0j\x98\xbc\xfc\xff\xff\xff\xff\xff\xef?\xc4\xfcC\xc9\xe0j\x98\xbc\xfc\xff\xff\xff\xff\xff\xef?\xc4\xfcC\xc9\xe0j\x98\xbc\xfc\xff\xff\xff\xff\xff\xef?\xc4\xfcC\xc9\xe0j\x98\xbc\xfc\xff\xff\xff\xff\xff\xef?\xc4\xfcC\xc9\xe0j\x98\xbc\xfc\xff\xff\xff\xff\xff\xef?\xc4\xfcC\xc9\xe0j\x98\xbc\xfc\xff\xff\xff\xff\xff\xef?\xc4\xfcC\xc9\xe0j\x98\xbc\xfc\xff\xff\xff\xff\xff\xef?\xc4\xfcC\xc9\xe0j\x98\xbc\xfc\xff\xff\xff\xff\xff\xef?\xc4\xfcC\xc9\xe0j\x98\xbc\xfc\xff\xff\xff\xff\xff\xef?\xc4\xfcC\xc9\xe0j\x98\xbc\xfc\xff\xff\xff\xff\xff\xef?\xc4\xfcC\xc9\xe0j\x98\xbc\xfc\xff\xff\xff\xff\xff\xef?\xc4\xfcC\xc9\xe0j\x98\xbc\xfc\xff\xff\xff\xff\xff\xef?\xc4\xfcC\xc9\xe0j\x98\xbc\xfc\xff\xff\xff\xff\xff\xef?\xc4\xfcC\xc9\xe0j\x98\xbc\xfc\xff\xff\xff\xff\xff\xef?\xc4\xfcC\xc9\xe0j\x98\xbc\xfc\xff\xff\xff\xff\xff\xef?\xc4\xfcC\xc9\xe0j\x98\xbc\xfc\xff\xff\xff\xff\xff\xef?\xc4\xfcC\xc9\xe0j\x98\xbc\xfc\xff\xff\xff\xff\xff\xef?\xc4\xfcC\xc9\xe0j\x98\xbc\xfc\xff\xff\xff\xff\xff\xef?\xc4\xfcC\xc9\xe0j\x98\xbc\xfc\xff\xff\xff\xff\xff\xef?\xc4\xfcC\xc9\xe0j\x98\xbc\xfc\xff\xff\xff\xff\xff\xef?\xc4\xfcC\xc9\xe0j\x98\xbc\xfc\xff\xff\xff\xff\xff\xef?\xc4\xfcC\xc9\xe0j\x98\xbc\xfc\xff\xff\xff\xff\xff\xef?\xc4\xfcC\xc9\xe0j\x98\xbc\xfc\xff\xff\xff\xff\xff\xef?\xc4\xfcC\xc9\xe0j\x98\xbc\xfc\xff\xff\xff\xff\xff\xef?\xc4\xfcC\xc9\xe0j\x98\xbc\xfc\xff\xff\xff\xff\xff\xef?\xc4\xfcC\xc9\xe0j\x98\xbc\xfc\xff\xff\xff\xff\xff\xef?\xc4\xfcC\xc9\xe0j\x98\xbc\xfc\xff\xff\xff\xff\xff\xef?\xc4\xfcC\xc9\xe0j\x98\xbc\xfc\xff\xff\xff\xff\xff\xef?\xc4\xfcC\xc9\xe0j\x98\xbc\xfc\xff\xff\xff\xff\xff\xef?\xc4\xfcC\xc9\xe0j\x98\xbc\xfc\xff\xff\xff\xff\xff\xef?\xc4\xfcC\xc9\xe0j\x98\xbc\xfc\xff\xff\xff\xff\xff\xef?\xc4\xfcC\xc9\xe0j\x98\xbc\xfc\xff\xff\xff\xff\xff\xef?\xc4\xfcC\xc9\xe0j\x98\xbc\xfc\xff\xff\xff\xff\xff\xef?\xc4\xfcC\xc9\xe0j\x98\xbc\xfc\xff\xff\xff\xff\xff\xef?\xc4\xfcC\xc9\xe0j\x98\xbc\xfc\xff\xff\xff\xff\xff\xef?\xc4\xfcC\xc9\xe0j\x98\xbc\xfc\xff\xff\xff\xff\xff\xef?\xc4\xfcC\xc9\xe0j\x98\xbc\xfc\xff\xff\xff\xff\xff\xef?\xc4\xfcC\xc9\xe0j\x98\xbc\xfc\xff\xff\xff\xff\xff\xef?\xc4\xfcC\xc9\xe0j\x98\xbc\xfc\xff\xff\xff\xff\xff\xef?\xc4\xfcC\xc9\xe0j\x98\xbc\xfc\xff\xff\xff\xff\xff\xef?\xc4\xfcC\xc9\xe0j\x98\xbc\xfc\xff\xff\xff\xff\xff\xef?\xc4\xfcC\xc9\xe0j\x98\xbc\xfc\xff\xff\xff\xff\xff\xef?\xc4\xfcC\xc9\xe0j\x98\xbc\xfc\xff\xff\xff\xff\xff\xef?\xc4\xfcC\xc9\xe0j\x98\xbc\xfc\xff\xff\xff\xff\xff\xef?\xc4\xfcC\xc9\xe0j\x98\xbc\xfc\xff\xff\xff\xff\xff\xef?\xc4\xfcC\xc9\xe0j\x98\xbc\xfc\xff\xff\xff\xff\xff\xef?\xc4\xfcC\xc9\xe0j\x98\xbc\xfc\xff\xff\xff\xff\xff\xef?\xc4\xfcC\xc9\xe0j\x98\xbc\xfc\xff\xff\xff\xff\xff\xef?\xc4\xfcC\xc9\xe0j\x98\xbc\xfc\xff\xff\xff\xff\xff\xef?\xc4\xfcC\xc9\xe0j\x98\xbc\xfc\xff\xff\xff\xff\xff\xef?\xc4\xfcC\xc9\xe0j\x98\xbc\xfc\xff\xff\xff\xff\xff\xef?\xc4\xfcC\xc9\xe0j\x98\xbc\xfc\xff\xff\xff\xff\xff\xef?\xc4\xfcC\xc9\xe0j\x98\xbc\xfc\xff\xff\xff\xff\xff\xef?\xc4\xfcC\xc9\xe0j\x98\xbc\xfc\xff\xff\xff\xff\xff\xef?\xc4\xfcC\xc9\xe0j\x98\xbc\xfc\xff\xff\xff\xff\xff\xef?\xc4\xfcC\xc9\xe0j\x98\xbc\xfc\xff\xff\xff\xff\xff\xef?\xc4\xfcC\xc9\xe0j\x98\xbc\xfc\xff\xff\xff\xff\xff\xef?\xc4\xfcC\xc9\xe0j\x98\xbc\xfc\xff\xff\xff\xff\xff\xef?\xc4\xfcC\xc9\xe0j\x98\xbc\xfc\xff\xff\xff\xff\xff\xef?\xc4\xfcC\xc9\xe0j\x98\xbc\xfc\xff\xff\xff\xff\xff\xef?\xc4\xfcC\xc9\xe0j\x98\xbc\xfc\xff\xff\xff\xff\xff\xef?\xc4\xfcC\xc9\xe0j\x98\xbc\xfc\xff\xff\xff\xff\xff\xef?\xc4\xfcC\xc9\xe0j\x98\xbc\xfc\xff\xff\xff\xff\xff\xef?\xc4\xfcC\xc9\xe0j\x98\xbc\xfc\xff\xff\xff\xff\xff\xef?\xc4\xfcC\xc9\xe0j\x98\xbc\xfc\xff\xff\xff\xff\xff\xef?\xc4\xfcC\xc9\xe0j\x98\xbc\xfc\xff\xff\xff\xff\xff\xef?\xc4\xfcC\xc9\xe0j\x98\xbc\xfc\xff\xff\xff\xff\xff\xef?'
p209
tp210
bag2
(g3
(I0
tp211
g5
tp212
Rp213
(I1
(I2
I421
tp214
g12
I01
S'\x8e\xa1\xc4\x13ic\xbe\xbf\x82\x03\x998\x80\'\xf4?$}"\xa0\x87.\xd3\xbfF2\xefqX\xd4\xfa?`\xf8\xeb\xb8\xe4]x\xbfuF\x02>\xec;\xf0?\xfe\xa8"\x7f\x9ani\xbf\xfc\xc7\xf5\xee\xc1(\xf0?\xdc\xe2\x0c,\xc3\\\x96\xbf\xb1Zc\x1a\xeb\xcc\xf0?}\x9b\xdbR3$\xb0\xbf\x7f\xd1deYN\xf2?\xe3$\x88\xee1\x1b\xbc\xbf\x11\x1aL\xc8\x07\xc5\xf3?\xf6{\xa9\x8f{\xf7\xb2\xbf\xcfJ\xabeF\xaf\xf2?\x0c\xd3\xd7 \xa0\x94\xd3\xbf\x13 \xb8\xb2\xfb\xa6\xfb?\xee\x8f\xab\xe2\xaa\x89\xc3\xbf\xf7\xa3P;p7\xf5?\xbe\xb8\x99\xde\x96<\xce\xbf\xd9\xf7\x07\x8f5i\xf8?\x8c\xb1\x113\x0b\x98\xc1\xbf6\x82\xb9%G\xd1\xf4?\t\x00\xb4\xc8\x94\x89\xd1\xbf\xd2\xdc\n\x087\xf2\xf9?5\xcf\r\x89n\x7f\xce\xbf\xbf\x0b\xb4BB\xaa\xf8?\xdd\x86\xa9Ck\xfa\xb7\xbf\x87\x94\x03\'\xbe\xe5\xf2?-\x86\xeb\x89\xb8\x92\xcf\xbf.\x91\xef\x11 @\xf9?\xc9\xc9`\xab\xc2\x9c\xb2\xbf\xe6y\xbf\x9at\x90\xf2?\xc0\xb9\xb2G\x84n\x8f?\xdeZ\x1a ?Y\xee?6\xcb4\x99\xe5 \xd0\xbf\xfe\xa1\x8bi\xe5\x8f\xf9?a\xf5\xe1\xc8\x0cq\xaa\xbf<-${\xb5\xeb\xf1?5Rb\x86\r1\xc2\xbf\x13\xf9\xa6YO\x1d\xf5??\xc7\x8d\xd8\x97\x13\xba\xbfK?9\x1c\xea\xb7\xf3?\xfe\xa0\xd6cv\x17\xc4\xbfq\xdf\xf3\x92\xaa\xb7\xf5?\x82\x07\xc3y;\xcd\x84\xbf\x88\x93\xc9\x92\xab{\xf0?\x9f\xaf}\xef\x94\xfa\xcb\xbf\x93p\xb3\xfc\xf9\xd1\xf7?\x82}UD\x1f\x97\xaa\xbf\xa9\xe4\x05gvj\xf1?7\x19J1\xcf\xbd\xba\xbf\x97\xcad\x9e\xa0\x03\xf4?)\x0fOg\xb3\x9a\xcb\xbfH\xcf+O\x82\xf5\xf7?k4\x9dB\x00R\xb8\xbf\x9f\xe0WzJ\x83\xf3?\xb7$\x06O\xf9v\xaf\xbf\x16\xeas\x19\xfd3\xf2?\xe2\xfc\xfa\x86\x87\xa6\xaf\xbf7\x8b\xaeg\xb1\x0f\xf2?\xd7\x89[\xd0\xf0,J\xbf\xd0$F\xa7U\x17\xf0?\xaep\x8d\xae+\xce\xc8\xbfU\x11\xff\xe1\xfc\xee\xf6?VC)%!d\xbb\xbfp\x99\xc1&\xce\x0f\xf4?\x81\xcf\xb4\xac\xdb$\xb3\xbf\x1b\xaf\xa94\x07^\xf2?c\xf2\xb3d\x95!\x88?\\\x94\x12\xe3\x86\xf9\xee?\xd2O\\\xce\x97\x17\xcc\xbf\x7f.5g\xe5x\xf7?\xf8^\xc55\xfb\x9e\xc3\xbf\xf8\xe6\xe3\xa1*4\xf5?>YlqJZ\xb2\xbf\x9e\xd1N\xc8\xd9B\xf2?\x93\x1b\xfds\x97\x19\xc7\xbfy\xc1X"B\x9e\xf6?fo\x8f\xd6\xd1\x9b\xd1\xbf\xeda\x1e\xa0\xa5\xe9\xf9?&\xb6DR9\x87\xb5\xbfB\xef\xb9m\x14\xcb\xf2?<Z\x154:/\xd2\xbf~kJ\x96\xe9q\xfa?\x04\xc7p^\xbd*\xbd\xbf\xa5#\xe6\x8c \x00\xf4?\xa3\'\x85N\x05+\xb6\xbfqC\xd2X\xf1\xf8\xf2?\xe3\x80\xa1\x96S\xb2\xce\xbf\xf4\xfd\x8b\xc3B\xba\xf8?k\x10\x8d\xbd\xb0\xdb\xcb\xbf N\xa0c\xc7\xe6\xf7?\xf6\x8f\x94\xce\xdd\x0b\xb0\xbf<\xc8\xd0\'\x939\xf2?\xeb\xf1\x0e\x07\x9d\xdb\x95\xbf\xff\xef)\xd8\xd7\xc6\xf0?\xe2j\xb5,2F\x86\xbfUj\xfc\xd2\xd5Q\xf0?yq\x13\xc6\x06\xf1\xa8\xbf\xa8C\xd1/\xa2\xac\xf1?\xf6\xc6\x9db\x93\x1e\xd2\xbfhaK\xafq\xa4\xfa?\x1d\x13\x8ec\xdd0\xb7\xbf\xc9\xe6\t8%^\xf3?\xe9\xfa4VI\xe9\xb8\xbfw}3\xbc\x96\xbe\xf3?\x06\x87"\xdeg\xe2\xc3\xbf\x1b\x08\x9d"\x13\x91\xf5?\xe3\xbb\xe0\xee\x11A\xb6\xbfn\xbd\xa9\xe8U\x1e\xf3?\x00\xc7\x82#It\xca\xbf4\x17\xa0\x0b\xbd_\xf7?\xcd\xdb\xc1k\x06\xe5\xd2\xbf\xad\xe3\xa6M\xc8\xfe\xfa?\xee\xa2\xdct\x03D\xc8\xbf\xbe\xad\x86>\xc3\xe7\xf6?\xc8\xcc\xd47kl\xbe\xbf~\x90|\xa8\x19I\xf4?i\x8f#\x04\x14h\xd0\xbf\xd2\xb4\xca@\xb9B\xf9?|\x94@1[\x7f\xb2\xbf0:\x18\x1f\x02\xbe\xf2?\x8e\x06\xdc\xe4\xd4\xa3\xb5\xbfX\xcc\n\xe7&\x13\xf3?\xe9hw\xf0E\xae\xbc\xbfG\xb3\r$\xa8\xd4\xf3?\x88\x10t\x01\xf1:\xd0\xbf\xb3\x16\x8d\x9e\xb1?\xf9?\x1b\x97\xde\xa9\xdfe\xb1\xbf\x04o\x1a\xe3\x03]\xf2?Z\x11\x11.\xcb\x1d\xc6\xbfa\x81\xa2\x96-O\xf6?\xf8U\xde\xb8\xda\x83\xc8\xbf@\x88\xd3\xb8g\xa0\xf6?\x81\xae\x0eR8\x7fd\xbf\xa0\x96N\x93Y&\xf0?5#\xd6\xccs\xb2\xc4\xbfB\xd4m\x95\x97\xcf\xf5?9\x89\xba\xc4)F\xc6\xbf$\x89\xc8\r\x1e1\xf6?\xb06h:H\x1b\xb8\xbf\xd7\xcb\x1f\xc7\xbep\xf3?z]\xeb\xf7\x02\xd7\xcf\xbfs\xc96g\x1c\xd1\xf8?\xd3\xf3+\xfcT>\x80\xbf\x91=?^\xa43\xf0?"\n\xe2\x1a\x81\xdf\xb6\xbf\xfd\x8e!\xb6\xe5\xf2\xf2?}\xfd.\x1c\xd6\xcb\xcd\xbf!b\x1aB\x12\x8d\xf8?\xf9s\xb2\xc9eb\xb4\xbf\xb5\xc5\x9f4p\x05\xf3?j\x9a\x9e5\xd2r\x93?\xb4\xc6uK\xe5\xb8\xee?\x8bE\xe3\x19\xd1en\xbfk\xff\xce\xa4\xa8\x1a\xf0?\xdd\x7f\x14\xe9\x9c\x07\xce\xbf:\\Ik3F\xf8?\x7f^\xaf\xa6\x82X\xb1\xbf\xcf\x1c6U\x9dm\xf2?\x1fd\xa5\x12J\x13\xb9\xbfw"\xa1B\x0f\xb0\xf3?\xcc9\xc4\xfa\xdf\xbc\x98\xbf4\xa4\xf7\x85\xa6\xf5\xf0?\x7f\xb50{\x80\xa3\xcc\xbfd?\xf4\x9d\xf9\x14\xf8?\x04\x0e\x17\x8d\x999\xc5\xbf\x88\x05\xebyS\t\xf6?\x13B\xc2~.\xd1\xc9\xbf\x83zUhJ\x0c\xf7?\xdb\'\xcb\xbeA/\xa4\xbf\x1a\xe3\x84\xc8\xf6~\xf1?\xa2\xb3Q\x16\xe6\xaa\xcb\xbf\x10\xf6?\x85~\xe3\xf7?\xb3W\xda\x1a\xba\xae\xc4\xbf^X\x91\xad@\xf3\xf5?\xba*\x83\xd6"\xe3m\xbf,k\xed\x04F\x01\xf0?\xb5\x1e\xa1`\xf1\x8d\xb3\xbf~z|\xc6F\x95\xf2?\xaav\x89)o\xb1\xad\xbf\x0c\xa0i^\xa5\x02\xf2?\xfd\x9e&\xa4\xed\xec\xbc\xbf\xa3\xe9\xec\r\xd0"\xf4?\xbb(\xbe\xf0\xb5\xc4\xac\xbff\x19\r\xf4q\x0b\xf2?\xf8\xb54s\x7f\x9a\xd3\xbf2\x07r\x01-\x80\xfb?>\xe1\x1doI@\xaa\xbfI?~\xae\'\xc5\xf1?\xa1(\xf772G\xa5\xbf\xd6b\x8db\x06\x82\xf1?\xe7\xf77\n\xc4\xb0\xae\xbf\xdf\x81>\xde\x9e*\xf2?x/BB[\xfb\xc7\xbf:\xb9\x1f\x11Z \xf7?\xf7\x84r!\x19\x0b\x92?\xe8\xf9\x8f\xa7\x11\xe6\xee?\x9bQ\xff\xf3\xf7\xb1p?\xaf4\xac\x10\x11\xcf\xef?M\xbeS\xfehL\xd0\xbf\xef\xcf\n\xcb\\X\xf9?\xc6D@\xb1\xd4\x9d\xd0\xbf\x04+!\xd2 \xfc\xf8?\x8d\x88\x93J\xed\xa2\xc6\xbf\x06{\x17\xc6#\xd5\xf6?\xbc\xd0\xa3\xf5Q\x97\xd3\xbf\xf6\xf6\xe2\x04\xd3U\xfb?\xfe\x11\xff\xe9r\xa6\xba\xbfR\xa0.\xb74\xc3\xf3?\xe7\xd2r\xb7\xbc.\xcb\xbfJ\xc2<\xec\xd1#\xf7?\xf1C\x06\x80\x95\xdc\xd1\xbf\xf4\xc8\xc2\x8f\xcb\xfa\xf9?\n\xb5X\xc41\x02\x9a\xbf\x9f\xb9\x91\xfc\xb6\n\xf1?\x816\x05\xf9\x80\x08\xd1\xbf\xfc\xb5\xabh\x1cx\xf9?\xf8\xc9\xee\xac\x1a\x99\xc1\xbf\xfe\xca\xf7\xf4\x05/\xf5?\xa1\xf8S\xbcD\x11\xc9\xbf\xc8F\xfb*\xc3\x19\xf7?\t\x02\xa9\x8a\xa01\xc6\xbf\xf5\x00\xf9\xe9\xbb\x19\xf6?\xfa\x8b\xea\xa6\xdd\xc1\xcd\xbf\xd5r\xbd\xc1_W\xf8?b\x18\x90\xce8\x9d\xca\xbf\xb9|\xa4\xec\x83\x1c\xf7?O\xcbt\xdb7}\xc2\xbfPl>f\xb7#\xf5?-B\x91\x9f\x92\xbf\xc3\xbfR5\xf9Y\xcbr\xf5?\xecXw\xe6"\xae\xd0\xbf\xed\xb2\xad \xea\xab\xf9?:\x90d\xfaV\xe7\xc6\xbf\xb6\xd4`4\xf9\x9d\xf6?B\xc9\xc8@t\x98\x89\xbf\xe4\xd1\xcfC\xb7d\xf0?6"\xbe|\x91Z\xc1\xbf\x10\x90\xf4\xcf\xf0\xbb\xf4?z\xbb\xc3\xc2X\n\xc7\xbf\xd2p\x92q\x02V\xf6?\x80 ^\x98\xa8\xd9\xd1\xbf>\xa2\x831\xdc.\xfa?\xc1\xba\xf6\xd2\xcf\xe6\xc4\xbf\xb7W\xb5\xad\x1d\x81\xf5?\xfc\xbd\xa6\xee\x8bu\xcf\xbfs\x80\xe5\xb4\xe7\x1d\xf9?\xee\xcf(k\xb42\xc0\xbf6\xd6iV\xb8\x84\xf4?\xe61\xd8Os;\xc8\xbf\x92\xd2{\x10\x00\xe0\xf6?y\x80\xa1?\x86\xe1\xce\xbf\xb3\x17_}~_\xf8?BO\xae?J]\xce\xbf9\xb1\xdd7\xf4\xb1\xf8?A\x90\x19\x1a\xc9\xb0\xc6\xbf\x89\xbdu[\xd8D\xf6?\x06\x9e\x1c\xbf)\xe6\xbf\xbf\x0f.\xb4\xa6{T\xf4?l\xd1/\xc2u\x1e\xd4\xbft\xc9\x07\xb4W\xab\xfb?g\x89J\xb6\x84\xbd\xbd\xbf]\xf3\x9a\xac\xf1X\xf4?\xbe\xf0\xbf\xeaa\x94\xc2\xbfz\x90Q\xc2\xe9c\xf5?<EI\x8e\x18t\xc1\xbf\x04b\xf0\x81 \x14\xf5?SH_\xfdo\xc1\xc0\xbf\x96\x16\x9f\xc6\x1e\xe0\xf4?p\x94\xfa?\xf4\x9f\xc1\xbf\x15\xe1\x13>\xa1\xaa\xf4?`$\xa6^\x8c\x08\xa5\xbf%\xda\xcdM\xb1}\xf1?\xaf\xb8\xd7\x15\x81\xf3\x9a\xbf\xd5\xe0+n\xd3\xeb\xf0?\x93\xfeP\xa6\xe5y\xbd\xbf\x1f\x0e\x9bw\x07\x16\xf4?r]U\xa7\x90Q\xca\xbf\xd1\x9fC\xf1\xfd[\xf7?\x1b4IA\xb0D\xcf\xbf\xd8\xec\x83\xb0C\x93\xf8?\xab\xba\xbc\x08\xd3\x18\xd2\xbf\xd5\x84\x94\x1b\xea>\xfa?\x94\xee\xf3\xf7\x15C\xc8\xbfK\xc9\xaf\xaa\xf7\xf1\xf6?\x0b|,\x8f\xe0\xc5\x90?\xc8D^\xa5\xb3\xd8\xee?\xba\xf1\xc8\xafkg\xc2\xbf\xfbdH\xc2O\xd9\xf4?\xa2Q\xff#\x84L\xa1\xbf\xbb\x12\xefa/:\xf1?^\xb4\x1f\xed\xd6\xc0\xc3\xbf\xd6\xa1%\x11\xccB\xf5?\x04\xe1\xf5\xafv\xfe\x84?\x0b\x18A|\xc2~\xef?i\x11\xf4\x95\x0c\x9a\xb6\xbfT\xaf\xce\xbb\xfa+\xf3?\xec\x94d2\\\xda\x81\xbf\xb3\xd7\x16-\xd8H\xf0?\x8f\xdb\xb1\xbb\x99\xc5\xcd\xbf\xe0\x83\xcfj\xf7\xe0\xf8?B:.\xabF\xbe\xd0\xbf#\x96\x9c\x93\x88R\xf9?\xc1\x91\xf3\xdf\x08\xdc\xc0\xbf\x13\xc7c\xa5\xbc\x08\xf5?D\x11\x01\xad\xcd\x9e\x80?\xc5$+\\"f\xef?\xeb%\x92`\xe16\xd0\xbf\xc2\\\xc1F\x19\x87\xf9?\xc4\xd4%\x14\x9b\x8b\xbe\xbf\xcf\xc98\xa6t/\xf4?+\xa3E\x01\x89\xc5\xcd\xbf\xb4\x12\xf7!p\xdb\xf8?\xa7\'\x80\xba\xd6\xbc\xcd\xbf\x06\'x\xe6\x01c\xf8?\x8f\xbf\x934\xcc1\xc0\xbf\xb4D\xeb\xaf\x0cx\xf4?s.\xac\xe3\xfcU\xb1\xbf\xdf,\xba\xd9\x81x\xf2?%\xa8\xad4u#\xce\xbf\xf3U\xf32\xd65\xf8?\xe2\\g\xfd=A\xd2\xbf\x1e\xfej\x12\x1f\xc3\xfa?x\xd26\xd0\xa8\x8f\xc8\xbf4\xadn\x1ax\xaf\xf6?\x8dl\r}\x8cR\xcc\xbf\x9b\x90\xb4k\x9b\xc6\xf7?\xc9\x0e{$ \x99\xd0\xbf\x97\xc1\x0e\xbaS_\xf9?\x05\xcb0j\xbe\xe2\xa4\xbf\x1f>2\x10\xe59\xf1? T\xc0"\x1b\xa7\x98\xbf\xf2\xa6\x15\xaej\xc1\xf0?^aC\xc8[\xbf\xa3\xbfo>\x9f\xa9T\x86\xf1?\xb6\x1c\xa4\xd4;f\xd3\xbf\x89\xbaF\xc5\x95\x04\xfb?x\xedzi\x16\x03\xc5\xbf\x835\xb1\xc6\x03\x04\xf6?\x8f\xb5\x8e\x82W\xe8\xb9\xbf\x10\xcb5U\xfa\xa9\xf3?-\xdd\xcc\xe7\x8a\xecx\xbfT\xce^\xc0i0\xf0?B\x88<\xf9\x04\x0e\xb6\xbf\xe035\xc8\x11\xf5\xf2?K\x82)\x16A\n\xac\xbf&\xc2`]|\xea\xf1?\x88\xd0S\xbc\x8eJ\xc4\xbfX\xce\xf0\x07\xf6\xfc\xf5?\x02\xda\xfdAh\x0b\xd3\xbf\xfc\xf4\x00M\xa1\xdd\xfa?E8\xe9U\xcc\x9b\xcc\xbf\x0b\x8f\x9e\xb7\xbe]\xf8?\xac\xfeC\xe9#9\xc1\xbf\x0b)\xec\\\rn\xf4?\xfa>$H\x7f\xfd\xc1\xbf\xf3*m\x8b\x12\xd7\xf4?\xe2l\xe0\xd0\xc2\xc1\xa5\xbf\xb3r\xceA\x9dq\xf1?\xd2y\xa0\x95\xcd\xdb\xa6\xbf9\x04\xd4\xbbE\x8c\xf1?\xfb\xb3\x05 \xed\xea\xb7\xbf\xce]\xed\x1e\x83h\xf3?\xd7\xa5\xf0\x83R\xd3\xb1\xbfT\x9d\x01K\xc9\xef\xf1?n\xea\x9b\x05\x15\xa3\xbf\xbf\x8a\xc1\xbe\xd2\xf9\xaa\xf4?qY\x12\xb4\xed\xdf\xb9\xbf\r\xf6{\x15g\xa5\xf3?-\x18\xd3\xf21\xfa\x99\xbfL\xc6\x8eU\xca\xdc\xf0?^\xf2H\xa3\xb9\xcc\xad\xbfvy\x03\r\xd1\xf7\xf1?\xc2\xe4\x96\x05\xb2Z\xd3\xbf\xe3W\xec\x17\x08\x8b\xfb?sH\xb6\xdb\xd3\x93\xcf\xbfNwg\x11S\xe6\xf8?M\xe27\x82\xe4\xc9\xa8\xbf\x82\x17)\xb9\x98\xe2\xf1?d\xfb&\xdf&l\xd0\xbf\x96\xf7)\xd7\x1fd\xf9?\xa0\xf86KSw\xc0\xbfP{nt\x18\x9c\xf4?\xf2V\x84\xf5l/\xc8\xbf\x02\x96\x13aC\xdd\xf6?*\x12:a\x90\xb1\xa0\xbf\x96Hd`\x82\x1c\xf1?\x98\x9c<n\x98\x88\xc7\xbf\x8d\xea\xf1\xa1Y\x9f\xf6?|g7\xf5\x1c\xb9e\xbf\x15\x13\x87\xbfS\t\xf0?\x9b\x13\xb3\xcf\x14e\xa6\xbf\xff\xb9^\xad\x1a\xaa\xf1?\x12\xeaB\xe9\x9dX\xd2\xbf\xc7\x1c\x90\x80\x98\xae\xfa?/\xe70\xf0oY\x97\xbf5\x17\x92\xb9\xff\xc9\xf0?\x82;n\x05\xd6U\xba\xbfz,\xe0\xe9Az\xf3?POG\xcf\xbd-\xc2\xbf\xe0.\xa3\xdc\xcd\x08\xf5?\xd7W\x81\xdd\x90$\x95\xbf=\xfc\xf8\xa5\x82\xf5\xf0?\x1b\xa9\xd5\xcd\x06\xed\xa4\xbf\x83\xcd\xbc\xb4?\x8b\xf1?\r\xb2\x88*\x98\xb1\x9d\xbfa\xfd\xdeI\x08\x19\xf1?~|\xa2\xbdP\xf7j?T\xbb\xe1\x97}\x08\xf0?\xb0\x9di\xf6\x15\xc8\xc1\xbf\xf8\x9b.\x8a\x1e\xe6\xf4?\xd0\xa9\xbe\x9f\xe3\x12\xca\xbf\xf6r\xfcco \xf7?\x9ck8q\x01\xe0\xc3\xbf\xd8\xb8\x97\xf5\x91|\xf5?\x9bMy\xf3\xbf\x10\xba\xbf$\xf9\x81Q\xf5z\xf3?6\x93\xab\x05\xfc\xd0\xc7\xbf\x83\x1a\x1e\x8b\x9c[\xf6?\x98=$\x0fOZ\xc2\xbf\x97\xc9\\e\xb6$\xf5?\xca\xbeJ\x17n\xa4\xbf\xbf}4\xf0?\xada\xf4?+\ta\xff\xa7\xb2\xc5\xbf\x15<\x9c\xd1X1\xf6?\xe8P<dAj\xba\xbf*S\x1d\xeeB\x8c\xf3?|"\xd3\xd1\x12\xa0\x9c\xbf%\xc7E\xe45\xfa\xf0?\xe0\xc2\xbaw/\n\xb7\xbf\xd9\x1b.2\xaa\x07\xf3?\xaecL\x98cA\xb7\xbf+\tFy)3\xf3?B\x82\x11l\xaa\xd7\xba\xbf\xa74\xf0\xc2\x1f\xca\xf3?\xfdy\xd1\xa0\xbe8\xca\xbf\x9d\x87Acx}\xf7?H$E\xef\xa7C\xd0\xbfd\xa1Q%8\xff\xf8?O\xf5\x8ey\x01!\xd0\xbf\xde\x15\x90\xf3\x15\xd1\xf8?l\x03\x1dD\x8d2\xc2\xbf~%\xc5\xf5i\x1c\xf5?\xeb3\xcd\xad\x08m\xbb\xbf\xd7a\x05\x87\rw\xf3?\xc8\x87\x1a\x8a!B\xba\xbf"c\xa2J\xd4u\xf3?&aH9\xeb\xe3\xa0?\xf08\x11\r\x88*\xed?\x1f\x1b\xec\xa0\xa6\xe9\xd1\xbf\x0e\xc0\n\xa6\xfbq\xfa?O!,U:\xd1\xd0\xbf\r\xa0\xef\xd9i;\xfa?\xbc\xf11\xc3\xf03\xc9\xbf\xba\xc4\x94\x97\xec<\xf7?\x8f7\x19\xfd\xf2\xf0\xcb\xbf\xeb":\x04\x90D\xf8?nb%bL\xbb\xb8\xbf:?\x1d\xcb\x14g\xf3?tJ\x17\xbc\x9dw\xcc\xbfo\xc0\x91G1\xbc\xf7?\xe9_8\\\x93\xdf\xc2\xbf\x92\xf5AM\r\x05\xf5?\x011N3\xea\x7f\xc1\xbf\xf2\x00+\xe9\xf2\xca\xf4?\x12\x0e\xcegHK\xc3\xbf\x85I\x7f$\x8a\xc4\xf5?\xa2\xb6\x9aa\xb3d\xc1\xbf$\xe4\xec\x9a\x0f\\\xf4?\xd5\x9c\x00\xdb2\xa3\xc8\xbf\xe0\x166K\xa3\xf5\xf6?p\x8c\xb9y\x90v\xba\xbfR\xd1\xcc\xf2Ew\xf3?\x93\xbb\xfe\xa9\x0c8\xcf\xbf\xceZ\x99\xe2 \xb1\xf8?\x0cr\x01\x037x\xbe\xbf\xc0)\xf5R\xd03\xf4?HU\xa6\xde\x87\xe1\xc3\xbf\xcb\xe2\r\xed\x0b\xbc\xf5?e6F\xdd<Z\xc3\xbfH\r\xb6\xc4\x89n\xf5?\xe8\x02zp\x98\x01\xcb\xbf\x00)\xcb?\x16[\xf7?\x0c\x99\xbd=v\xbc\xb1\xbf\x0c \xa5\xf4\x9eO\xf2?\\\x0c\x06\x8f2\xb5\xc7\xbf\xe6\x9f=\x82\x08j\xf6?\xf8\'\xfa\xa6a\x9b\xa2\xbf\xb7\x91&5\xde/\xf1?\xd2\xbf\x83\xdcV\xa5\xc2\xbf\xb8\x7f\xd0\xf1&\x81\xf5?\xd1\x94r\x94\x8a)\xca\xbf\x87\xb7\xd7-\xf0\x9a\xf7?x\xc8{&\x01\x07\xce\xbf\xcb_\xfcwYb\xf8?\xcf\xaao\xac@`\xab\xbf\xfb\x8f\xe6\x9b\x7f\x89\xf1?\xad\xd7\xb6\x97^\xab\xc8\xbf\x14\xff\xa37c\xf2\xf6?\x8a\xdc\x18G\xcb\x81\xb0\xbf\x88b\x95\t\xd5\\\xf2?\x92\x06\xfb\xec%\xad\xbf\xbfSX\xcc\xc7ri\xf4?\\\xc9\x8b\x13\xe7\x94\xc8\xbfm\xf1\xe4\xf1m\xa0\xf6?\x89\x8fb\x8d\x86>\xa2?\x91\xc2\xb3\xa5\x1c\x05\xed?\xb9\x1a=oO\xc4\xc0\xbf\'v\xaa\x0c{\xa4\xf4?\xa52\xf0-!\xcc\x96?E.c\x01\xdcK\xee?\x16\xa3:\xdd~\xe9\xca\xbf\x9b\x0b\x9cbpM\xf7?\xe3a\xd0\xbe[\xbe\xca\xbfG$I\x8aX\xa3\xf7?]\xbb\x94\x0c\xb4\x0b\xb0\xbfS\xdf\xf4n\xd88\xf2?J\x0eIm\xb7\x9c\xc8\xbf\x18H\xc1\xde>\xb6\xf6?o\r\x84X\x91z\xb9\xbf\xc3\xed\xbb\xcd\x01$\xf3?\x87\xff]\x00\xae\x83\xac\xbf\xfe\xf2\x16?S\xd0\xf1?\xb8\x91\xe2\x00\x01\xa0\xc2\xbf\x98\x92\x1d^\x7f\x96\xf5?\xa6\xd1\xd2\xcam\xee\xbb\xbf\xcd\xf8\xe5\x17\x1a\xeb\xf3?*\xabl\xf4\x07\xea\xad\xbf\xe2q\x00I\xe9\x16\xf2?\xd4\xed:\x0bT\x86\xc9\xbf1\x9bz\x1d!a\xf7?\xcdJ,W,}\x9c\xbf\x81\xdfK\x9e\x9b\xfe\xf0?\x08\xc4\xd1"\x10\xc1\xaa\xbfA\xb3m\xb3\x80\xc7\xf1?I\xcd\x01\r4)\xa0\xbfXK\xf0![\xd1\xf0?Q\x14\xf9M\xac\x1c\xc4\xbfG\xcc!)\xe9\xef\xf5?\x95\x9e\xc0Y\xa4\x8c\xc2\xbf\xd1\xd8\xe7yo\xea\xf4?d#z\xdc\xeb\xb4\xc4\xbf^O\xad3b\xd8\xf5?a\xabg\x15\xcb\t\x98\xbf\xa0MQ\x10\xad\xd0\xf0?\x84\xe7\xe6\x0c\x12\xb9\xd0\xbfK\xe5\xf7\x18\xe9\xa7\xf9?\x8a;\xe0\xe7\xe8\xe0\xc0\xbf\x9d:\x12p\xdf\x94\xf4?\x0b\xd0i\xa2\xb4v\xc4\xbfJ\xc5)\x0fw\x02\xf6?X]\x97r\xc96\xc3\xbf\xf2\x9brS\xe28\xf5?\xcf\x9d\xd2x\x8bZ\xc1\xbf\x0b\x8f\xad#?\x84\xf4?\\\xaaJ\x8e\xfa\x03\xc6\xbf\x9b\xe0x\xb3+\xc4\xf5?n\xa4\xa8\xa6KV\xbc\xbfd\xef\x0b\x16\x11\xfa\xf3?\x1al\xdf\xb5\xc8\x14\xb2\xbfA\xc0\xe6\xd7\x81\xe8\xf1?w\x05h7![\xa1\xbf\xd5\xbe$\xd5\x8ej\xf1?1G\xddf\x7f>\xcc\xbfv\xc6\x07[y\xad\xf7?R\x08\x1cX\x85^\xd0\xbf\x90\xb01\xee\x83\x11\xf9?\x0eE\x11\x06\x00\x93\x98?\xb4.\xbd\xde\xd8E\xee?\x14\xfa\xcc\x8b\xd8\x8a\xc5\xbf\x8e\xfc\xb0\xa7\x9c\xc5\xf5?\xe6(\x9a\x8e\x1fL\xb1\xbf\xc8\xf07>\x8d\'\xf2?c1\xe5\x8b\xda\xd1\xbc\xbf\xf5\xc1)\xac\xbe\x14\xf4?\xe4\t0$\x8b\xe4\xc8\xbf\xca\x88\x80\x0b\xd1i\xf7?M_gHup\xc0\xbf\xd7\x0fr\xf9_l\xf4?0$\xa1\xb3\xf6\x89\xc9\xbf\xf7\x1dD\x80\x92\x84\xf7?\x12`d\xbe\xea\x08\xd3\xbfI\x96n]][\xfb?\x91+\x8a\x12XO\xd2\xbf\xff\xa2\xf8\xa56\xa0\xfa?:]>\x91\x0f\xbe\xac\xbf\x84\xd6xKB9\xf2?\xb7j\xcd\x0b\xe1\x00\x95\xbfL+\x8f\xd3\x9d\x9f\xf0?>\xd3\x0e\x97\x8e\x8e\xb1\xbf\xf3|\xb0\x80\x13\x10\xf2?Y\x15\x176jQ\xc5\xbfP\xdb"\x98\x99\xf4\xf5?\t\xbc\xfc\xf4\xd8\xa5\xc0\xbf\xe4s\x16\xb9\x8a\xb1\xf4?uR@\t\xc1[\xc8\xbf\x1b\xb2\xc5\xb1\xaf\x86\xf6?\xcf\xa6I\x12\xec\x9f\xd0\xbf\xe97\xfc1\xe2d\xf9?\x87\xbb\xa5\xa3So\xa0\xbf\xbbM\x18\x8e9/\xf1?\x08\xe2\xa4\xb5N(\x8f\xbf\xb0\xdbL\xb8\x02[\xf0?\xfa\xbe#\xff\x1d \xc0\xbf3\rrK\xe4\xab\xf4?\x9e\x12\x97H]U\xd2\xbf\xbf\xb5Rr\x15\x0b\xfa?\x88\x1aR-\xf4\xe0\xc1\xbfD\xc5M\xab\x80\xfa\xf4?\x7f\xd2\x88\x14\'?\xc2\xbf\xdatk\x8b\x9d\xdb\xf4?X\x84k\xbcY\xf0\xbc\xbfP\xea\xc7[Z"\xf4?\xf16\xc7\xc3\x0f\xe2\xc8\xbf\x7f\xeau\x0cs\x00\xf7?\x84\xfc\xdd\xa8\x8e\xcb\x87?G\xd4\x18\xf8\x16\xcf\xee?~\xce\x914A\xec\xbb\xbfT\xd3[k\x0f\x8e\xf3?hp\xbd\xc7\x0b\xa7\xc1\xbf9\x80\xff_\xfd\xf1\xf4?#Oo\x82E\xa3\xd2\xbf\xd7\x9d\xfd\x85\xef2\xfb?\x85t\x14\xd0\xdf{\xb4\xbfb\x06\x91\x01\x1e!\xf3?\x8cW\xd2P\xfai\xae\xbf\xe0\xbe\x1dbC\x11\xf2?.\x99\xbe V\x16\xbc\xbf\x8a\x18\xda\x96\xfe\x06\xf4?\xee\xda\r\x9d\xdd\xe0\xc1\xbf\xd6\x96U\xd7\xf0\xd3\xf4?\xe1lh\xdd\xc9<\x85?\x91<c1\x18\x02\xef?\xd3\xcaK\x18o{\xc1\xbf\x7f\xacI\x00\xf4\xff\xf4?\x82C\x19\xd5/\xaf\xd4\xbf\x94\xf8m\xa5\x03\xcb\xfb?<\xfe\xd0a\xb8\x16\xa8\xbf\x84\xb2\xa8\x91M\xa7\xf1?\x89\x8c\xfc\xdf{\x96\xbc\xbf\xe6\xabI\xd0\xba\x07\xf4?1\xbaMZz\xfa\xb0\xbf\x88\r]\x0fxY\xf2?\x80\xdddx\x12\xfb\xc9\xbfn-\xb5\x9a9\x0c\xf7?\xccop\xad\xdac\xc6\xbf\xe3\xcc\xbd\xac)\xf7\xf5?\x8d\xde;\xc6\xba4\xc8\xbf\xe9\xda{\xe0\xe0\x06\xf7?\xa4V\tj\x9b\xc0\xce\xbf\xf1\xe2?5\xfc\x9a\xf8?\xd8\x8d6u\x9a\x89\xb0\xbf\xbc\x87\x1e\x8d\xb9;\xf2?\xed\n7\xc2\xb2\xff\xc5\xbf\xd5\xdb\xb1U\x91"\xf6?LV\xd5\xfd\xe5\'\xcb\xbfp\x8aQwFo\xf7?\x99u>{(\x0f\xc0\xbf\xa4tb)\xf3\xed\xf3?\xbf\xf5\xf3\x1b\xb7\xe1\xd2\xbf"n\x18\xd7\xef\x99\xfa?\xbc\xbe7\x86\xda\xd0\xcf\xbfMCUZt\xcc\xf8?t+\x87\xe8\xc3\xfb\xcb\xbf\xe4\xf8d\xb4\x88\xf5\xf7?\xfb\xf5\xca\xe5\xc8\xba\xb6\xbfW\xf3S}(X\xf3?\xa7dz+\xe6\xc1\xa0\xbf\xaa\xed\x17\xa5\xa10\xf1?\xa6x.tOA\xc1\xbf\xec%\xf6>\xce\xc1\xf4?\x03H$\x0f\x92\xa7\xac\xbf7\xa6`p8\xcd\xf1?2\xe4\\\x1c\xed\x15\xb7\xbf7\x04\xe1\xacs-\xf3?\xad\xf5\x0e@\xe8\xb0\xc4\xbf\xc1\xe3*d\x00\xdd\xf5?1\xf5\x08\x8e\xaef\xcb\xbf\xd3:nd\xf4\x15\xf8?\xf63\x84Vq\xa4\xd2\xbf\xe0\xea\xf1 #\x14\xfb?LW\x0fW\xc0\xbb\xbc\xbf1q\x15\xc5\x90\xc8\xf3?\x15<W\x1d\xece\xb7\xbf<\x87\x9e0\x95\x0c\xf3?\x9e@\x83\xc2\xe7\x95\xc0\xbf\xee\xb4\x0b\x817h\xf4?\xef \xca\xd3\xd6\xe6\x8b\xbf\x16\x19\x05_\xa3c\xf0?\xf8\x08\x9b\xf2\x8a\x92\xcb\xbf\xf5\x85Q\x7f5\xff\xf7?\x12)\x96\xe4K4\xac\xbfE=;\xec\x99"\xf2?N=.S\x19\x03\xd4\xbf\x8a\x14h\xe0J\xb2\xfb?\x16.\x10 \xcbo\xc6\xbf7p\x19\x1d\xa8p\xf6?\xcd\xd2\x9c\xfd\xf1\xfas?\xd5F~\x98\xd9\xbc\xef?\xe2\xad\xfe\xe3w\x99\xc9\xbf}\x14\xf3KLp\xf7?}\x9a\xbeo8\x9b\xc3\xbf.W\tE\xa8\xa3\xf5?\xb5\x85\xcd\xfe\x11\x96\x9b\xbf\x19\xc3\xf7\xba\x81\xce\xf0?B\xb9d\xdf\xfeW\xa6\xbf\x0c\x0ct\x9b\xba\xab\xf1?\x94\xb4\xf9\x08p\xe5\xbb\xbf0\xc3\\\xb4F\xbc\xf3?/\x10.\xb6\xcb\xf3\x93\xbf\x02YXX?\xbd\xf0?\xa8\x92*\x16\xee\xaad\xbf\x08\r0\x97!"\xf0?z\xe7\xb3\xaf\xeb8\xd0\xbf\xa0p\xdb7~\xf7\xf8? W\xf9P\xa1\x00\xb8\xbf\xdd\xab\x90\x8f#\x1e\xf3?\x85\xe7\x80\x8da4\xc4\xbf!Q\xadd\xa6\xad\xf5?\xfbz"\xd9\xa7Z\xc7\xbf\xa2\xca\xf8`\xe6e\xf6?\xc2XR\xf6\xbcz\xa7\xbft\xe0\x9a\xf8\x9c\xcf\xf1?\xf0\xd9.U\xf2\xc0\xd0\xbf%\xe4h4\x0f\x95\xf9?\xf1\xe5Sx\x0fn\xc6\xbf\xdaj\xcf6\xba\xe7\xf5?\x96\x08\x19\xe4Up\xc6\xbfQ=\x9eQ\xdb0\xf6?X\x81Lf\'\x9d\xd0\xbf\xe09D%\xae\xc4\xf9??\xfc\xce\xde\x92i\xb3\xbf>\x95\xe0\xf8\xe0\xc6\xf2?7\x81\xcb<\\\x02\xc6\xbf(\x1b\x88\xc2:\x03\xf6?\x98:\xc1\xef\x93\x1a\xb2\xbfc\xc7\xd5\x0c\xfb\x83\xf2?\xed\xe0\x8e\x01gw\xcb\xbf\xe5\xcc\\J\xc8\x86\xf7?}:\x96b\x0e\x83\xc0\xbfZ?\xff\xc0\xa2\xb7\xf4?\xb6\xd1\x95\xc0\x07\xcd\xb6\xbf{\x8a\x1c\xebn\x0c\xf3?b\xb7\x94|\xe4\xe2\xc8\xbf\x1fQ\xdb\xb2\x15\x13\xf7?\x07-\x15\xda\x8e\x08\xab\xbfO\t\x91\xf3\x9d\xcf\xf1?V\x10\xbb[+\x80\xa4?PT\x8e\xf7\x152\xed?\x1f\xc5\xea\x07\xb7\xb1\xae\xbf\x0b\xb6\x93\xe2\n^\xf2?^]wgAj\xbc\xbf"\x12{\xbb\xd0\xd4\xf3?\xf3b}?\x9d@\xc1\xbf\xb1\xe7\xa0\x9b\t\x8c\xf4?c:\xfd\xd2\xd0m\xc2\xbf\xb1\xd7\x9f\x15\xeb\x01\xf5?\t\x13\x81\xbfY\xf5\xb9\xbf\x19(\x1d\nj\xb1\xf3?\xf8\xf7\x07Z^?\xd4\xbf\xb4\x9aW\rT\xf8\xfb?\xab\x97#\t\x8dP\xd2\xbf\x00\xa3\x13\t\xe2\xcf\xfa?\xb0\x0c}M\x80\x9d\xd2\xbf\x81X:LY\xcb\xfa?\xba\x89\x9a\xd3m\xbe\xd1\xbfhR\xfb\xec\xe3\xeb\xf9?x\x10\x03pd?\xc4\xbf\xf74Q\xefr\x8b\xf5?\xf0\xb9|\xbe\x14\x90\xd1\xbfH\xe2\x928\xb0\x82\xf9?SA\xf1\xd0A)\xb3\xbf\xb2e\n\xa8+\xb8\xf2?\xfc\xb2\xa5E\xf1&\xd0\xbf\xe6@\xc9\x97\xf1\xb9\xf9?oI\xaa\x05$4\xd2\xbfR\xad\xab\x8da\x9f\xfa?\xa5q\x87\xc5\xcf\x8a\xc7\xbf{\xe4\xf6m1s\xf6?\xda\x84\xdd\xaa\x8a\x96\xb8\xbf\xaby\xc2\xba\xf56\xf3?\x15\xc1\xb0\xdf\x9b\xa9\xc1\xbf~\xdb\t\x02\xc7\xd0\xf4?\xb64\x17V\x8e\xd9\xb1\xbf\x9b.\xf4\xb1S\xb5\xf2?\x18QX\x18\x86\xdb\xc2\xbf\xca\xb5\xa2\xa9\xc7g\xf5?\x9d\xf7\x18\x80@\x90\xc1\xbf\n_\x02\x06\x04\xc2\xf4?\xce#\x17\x1b\x9cp\xd0\xbfJ\xca\x9b-\x8c\xf4\xf8?\xean?\xefCr\xc3\xbf?\xcc\xa5\'\xa78\xf5?_t2\xd1L\xbb\xd0\xbf\xe1\xbe/\xac\xdd\x1e\xf9?Sj5\xe6#\xb5\xcf\xbf\xd2o\xed\xc5\xc7\x1a\xf9?\xe8\xd8\x96\x89\x01\xef\xcf\xbf\x8a\xd6\xcc\x19T\xf4\xf8?\n\x03\xabp!l\xc6\xbfh\r\x83\x1b^T\xf6?\x99\xf1\x07Td{\xd1\xbf<\x8c8\xc4"D\xfa?\x89w\xf5\n\xd4b\xba\xbf\xe6nD\x11e\x88\xf3?N\xe9\xac"_6\xa2\xbf3\x82*\xbf\xe5,\xf1?\xb2\x80\x8aW\xf7C\xb5\xbf\xdf7\xfc\xa5\xae\x19\xf3?\xf4\xa4\x05W\x80)\xc8\xbft\x96\xc2\xcc\x92\xb0\xf6?G\xcb\x1b&E\x9b\xad\xbf\xf9=h\xff\xe2\'\xf2?\xfe\x01\'\x1d\x17\x11\xc1\xbf\xadXq8\xa9\xa2\xf4?\x8c\xa7\xaa\xfd\x02\xfd\xb2\xbf\xa7,\xeb>\x99\xf3\xf2?bM\xf4n>\r\xcc\xbf\xb0\xbb\x0e\xe2-M\xf8?\xc9\xc2\xadcE\x9a\xc7\xbf\x18\xeb\xa0L\xf5~\xf6?s\nZ@\xc0i\xc1\xbf)\xdf\xac\xc27\x8b\xf4?\xbf\xf9\x8b\xcb\xc0\x08\xc5\xbf?\x11\x8e\xa20\xf8\xf5?\xcb\r\xe3\x07\xaf2\xa1\xbfN\xa8F\x94O(\xf1?\x96\xda\'\xb5\xc70\xd0\xbf\xee\n\xce\x13d\xe8\xf8?\xdb\xf7\x83\xdf5\x81\xc1\xbf\x87\x9f>\x99\xc79\xf5?9t\xa3\x8b\xb4:\xcd\xbf\x1b\xbed_,\xac\xf8?\x80\x85\xf6\xc4\xc4\xb9\x85?M\xbd\xcd\xd60\x0c\xef?\xd5\x8a\xd84\xfa\xbb\x9c\xbf\xea\xf9\xfc7\x05\x17\xf1?\x16F\xfa\xab\x12c\xd1\xbf\xd5w)ay\xa1\xf9?'
p215
tp216
bag2
(g3
(I0
tp217
g5
tp218
Rp219
(I1
(I2
I438
tp220
g12
I01
S'\xc1\x17\xee\x99\x8cy\xbf?\xde\x93{\x90\xcd\x95\xf5?\x9fu=>4g\xb3\xbfHS\xfc\xd0.\x8a\xe7?\xda\xf8\xa2M\x1e\xe5\xcb\xbf\x06\xb5`\xbec\xdb\xf7?\xc7fDM\xf2N\xc1?\xa5_\xbc\x00\xed\xb6\x0f@t\xbb\xac\xee\x1e0\xc0\xbf\x19\xd0\x7f\xfbmu\xf2?\xd9\xa2\x0esfl\xe3\xbf\xdbI\xd0\xbd\xc5v\n@\xc4\xb7\xb6\x87]\xc4\xda\xbf+\xa8\xcd_\x17\xa6\xfe?\xf9\x8fi\x05]\x92\xbd\xbfc\xc5\xfd/\xc3B\xfe?\x98\xae\x8fog\r\xc2\xbf\x1ck\xfa\xdc^a\xeb?py\x9d\x9cS\xf2\xcc\xbfh\x17@zV\x95\xfe?N\xb9\x1d\xb2V~\xd4\xbf\x18\xea\x9dc\xa9&\xf9?t\x10\xd2\xc7La\xe1\xbf\x99U/\xa1\x01\xc5\x03@s\x9ctg\xa7t\xdd\xbf\xe0\xf5r\xf6]W\x00@\x93}\xc2\xc2\xab\x0c\xda\xbf%\xa4\x82\x08\xc4\x82\x02@5\nk\x95\x05$\xba\xbf+6h\xd8\xfb\xf5\xfc?\x12\x08\x87\xf2\xfb\xbc\xba\xbf\xff\xb3\xf5\xe1V\xd5\xfe?\x8brH\xf7+\xde\x9a\xbf\x86H\x0bC\xe0w\xf8?\xa5\xfe\xf5\xda\x91\x90\xc7\xbfL\xfe\x95\xd8\xdc\x14\xe6?\x9a\xa7k\xf0Ny\x84?\xd1U#\xd5x\\\xfe?\x0c$Z0G\xbb\xc3\xbf\xc7\x97n\xd7\x13s\xf7?Pu\xf5z\xfc~\xa7\xbf(\x95H}j\xf4\xf2?\x8c\r\xd7\x86D\x8a\xc5\xbf\xe5\t\xfa\xf7\xe5\xbc\xfb?\x0e\x1eG\x80S\x9d\xd1\xbf\xb6:ncO@\xf4?X1\xb7k(7\xc9?\xdc8\x9c\x99$1\x12@^\xa8,1\xd1\x12\xc4\xbf3\x8e$\xba\xb7\x00\xf3?6HOD\x80\x1a\xc1\xbf\x8f>\xec\xefO\x15\xf2?\x160\xbe\xa0\xaf\x94\xc6?`-\x85\xd8\xb1o\xd8?\xb7i\xb4g\x0f*\xdb\xbf9\x8c\xf9,\x7f\x81\x03@\x7fr4\xc9\x19\xc0\xc8\xbfT\x97\xe2\xfaP\xab\xfd?\xa7\x16\x90>P\x9a\xcb\xbf\x98h\xfaj\x85a\xf1?z\x841}\xe5\xec\xb2\xbf\xd1\x00\xb6\xa7\x8a\xbf\xf5?\xc6\xb3=\xf8\x88\xed\x86?NEH\x8d\xd9\xfb\xef?\x05\x9bh&m\xfd\xdd\xbf\xd1!:\x19I\xbe\xff?\xa5Z\xbd\xb2\x95\xe0\xca\xbf\x9dR\xe6\n\xe8\xda\x01@\x86\xd0]U>:~\xbf\xbe[\xe2o\x8c\x03\xf0?n\x97w\x14\xf8\xce\xd3\xbf\xf4\x1b\xe5J\xccj\x01@\xc3\x14\xb3\xac\xfes\xf6\xbf\xbf\x06\x8ca\x1c\xbb\x1b@g\xb0\x85\x8exd\xc0?\x14\xf9*\xff\x8e\xb9\xee?LT\xd3^\xd0\xaf\xc2\xbf\xba\xea\xc4_\xa9\x9f\xec?\x18\xfc\xa4(\x93\xf7\xb1\xbf\x98\x1e\x9an\'o\xed?\xc0\xcak\xa1\xe1\xd5\xb4\xbf\xbf\xf4tQ\xba4\xf3?z\xc3\xf0\x1f7\x1b\xa1\xbf\x08\x94\xdcVB\xa6\xf4?\xec\xb2e\x86\xe7\xae\xc8\xbf\n\x84%\xb8/s\x02@\x11\xe8\xe9<\xdf\xab\xc2\xbf\xe5C\x8d\xc8b\xb3\xfe?\xb8!\x98u\xd4\xab\x81\xbf\xde\x92\xb3\x91o\xef\xf6?\xcb\xc6\xd2(4\x0c\xce\xbf\x91\xc40w\x1c\xd1\xf4?\xad\xdc\x83\xcfN\xc7\xe4\xbf9\x94\xd6)\xde\xe7\x0e@?\xab\xac,\xfd\x08\xc2\xbf\x10K\x04\xb6q\x9f\xf1?\xe5k\xe0\x0c\x15H\xcf\xbf5\x8f\x1c_\xae\xd2\xfd?OJG\x8e\x92\xf7\xd2\xbf8\x05G\x92Dq\xfd?0)\xea3s\xc8\xc6\xbf?\x80\xee\xb4\x950\xeb?\xf2\x06\xfeag\xd3\xb5\xbf\xf4k\xc8\xb7\xed4\xf7?\xd2C\xf5\xc1\x8d\x17\xd5\xbf\xf3\xdb\x04\x85S\xf1\xfc?\x16\xa5v\x8a-\xd6\x94?\xd6;\xbd\n\xba\x98\xf3?\x15v\xe01\x94\x81\xcb\xbf\x90\x99\xabcHz\xf0?\x9b\x13\x9a\xfc\xfe\'\xc2\xbf{s\xa9j\x97F\xf2?\xd9KCW\xa2\x8c\xd4\xbf\xb7\x1e\xd1\x95\xc3D\x00@\xee\x1do\xa7"\xde\xb5\xbf\x19\xad4L\xcd;\xf5?\xc9\xc1\xf2\xd2\x1d:\xdc\xbf\xbc\xbb\xd1\x16\xa6i\xfb?b\xd7h\x0c\xd1&\x8f\xbf\x81\x81rG3\x85\xe4?Lf\xee\x06\x91\x19\xc2\xbf\xff\x1bL\x9b\xba8\xf2?s\x81\x91\xc2\x960\xc3\xbf\x80\x02\xdf\x88\xc3\x07\xf3?\x02\x1d\xa4\xcf\x8f\x99\x7f\xbf\x12\xe4]\t\xf6\xef\xeb?\xcb\x85\x10\x8d\x98a\xce\xbf\xb5\xac\x03\xdf\x88\x7f\xf3?\xecn\xa3\x06\x04m\xcc\xbf\xf2H\x18z\xdf\xa9\xfa?\x84\xce\xc4c\xe5k\xd6\xbf\xcaJz\xb8s\xe7\x00@\x0f\x91,\xb5U\xea\xc4\xbfI\xb5p]\nw\xfe?z>\x0f\xf8YS\xc3\xbf\rsq\xe1\xed\x80\xf6?\xdd6\x12\xbd\xfc\x15\xe1\xbfx`\xf6\xfc\xa5\xe0\x02@\x9d\xac\x83\xf0wO\xc6\xbf\xda\xf6\xbf\xb0\xa3\x18\xfd?\x8f\xfdbD\x8d\xca\x93\xbf\xe6\x1a\xe0\r\xaf&\xe2?\xed\xb7h\xa8u\xa1\xd0\xbfZ?\x0c.\xc7\x06\xf3?Ht\xa5\xae\xf9\xef\xc0\xbf\x8a\x158\xe4\xa7\xa7\xf6?\x90\x0c\xd2\xa9\xae[\xc2\xbfLW\xf3*\x130\xf8?R\x97\xde$IO\xd8\xbf\xc2\x8d\x11oU\xef\x02@\x01\x889\x01Q\x0b\xe0\xbf7\x1f\xe6\x9e\xd8\xf6\xfe?\xc9_\x8c\xc1\n\x85\xbc\xbf\xd8G\xe6<4>\xec?\xcc\xa4\x0b\xda\xcb\xc3\xdf\xbf\xe7\xb1\xd1`>,\x05@q\x04\xa2 \x1a\x0b\xbc\xbf7\x0eT\x19!\xc0\xe3?\xa31\'\xce\xaa,\xc4\xbf\x91\x89\xc2r\xc5@\xf4?\x98\xa5\xa9\xc1\xb84\xb5\xbf\x02\x8c}\xc3\xd2f\xe4?B\x91L\x92}[\xf1\xbf\xf8\x90\xdd\xd7_q\x1c@V\xfd}\xc1\xc4L\xaf\xbf1\xd1T\xc7m\xde\xfa?\xe4?\x12$vB\xd8\xbf\xcf\nV\'B\xce\xfe?\xa8\xe3\xf0\xe7\x1a\r\xd6\xbf\xe7\x14\xcf\xa5s\xb9\xfa?f\x9dv\x06\xf7\x11\xdc\xbfc\x95Z\x8d3\xec\x04@\xa7\x86\xb3\x7f\xa9\xc6\xae\xbf\xb0.5\xc8\xc7\'\xf0?\x8as\xae\xb6\x04h\xb4\xbf\xd0\xf9\xf2\x93q\xfe\xf8?Q\xe7\xde\xac\xb8\xac\xc2\xbf6>1\x1d\t|\x04@$\x88\x81\x9f\xd1\xa0\xdb\xbf\xedT\xba\x8d\x83\xd5\x01@\xc3C%y\x1fT\xf3\xbf\xfc\xa3X\x87\x14A!@\xc52\x84H[\x16\xc1\xbf\x15\x1b\x80\xb1[K\xf7?\x7fT\xc8S\xd0\x90\xcc\xbf\xab\xa7U!\xc8\x91\xf2?\xd6\x82\x9e\xf3(\xc5\xe0\xbf\xbe\xe3\xb5&R\xa9\x00@\x8e\xaa6\xcf\xe2r\xa9\xbf\x97D\x99C\xd8\xa0\xf3?6\xf6\x8bZ5\x1c\xd5?Y[\xa5O\xad\xe4\xf1?\xd36u\x1e\x83,\x83?\xae1]\xcd\xaeI\xe7?\xad\xb5\xf5C\x83\xff\xd5\xbfa\x89\xc7\xd0\x00\xc7\xf6?\t(\xb5\x8b-\x9b\xd9\xbf|\x9c\xaf\xff\xa9V\x03@\x01&`\x88\xe5\xe4\xc9\xbfi\xdd*\x02s\x8f\xfc?\xdd>\xb2c\x9a\xa0\xda\xbf\x0ct\x80L\x86\xad\x12@\xa2\xf4Y\x9f\xee\xc4\xb6\xbf\xcc\xd6~\x96\x87\x80\xd8?N\xd5%\x01[w\xd2\xbf`\x19\xca\x12\xc1d\xfb?\x04WV(R@\xcd\xbf\xb4:\x12g\x9f\xb2\t@\xea\xce54\xe6\x7f\xd2?\x94\xe6v\'\xfa\x8a\x10@\xa8,\x07\x9e\x81\x1b\xb2\xbf|\x87\xa6T\xa0Q\xf9?\x96?\xb9\xc8\x05]\xa6\xbf\x00\xd7\x90\xc3m/\xfd?\xc2\xb5i\xden@\xc8\xbf\xb6\xb6\xbb\xb9R9\xf2?T\x10-\xd6\x1c\x05\xc8\xbfXz\x8c$\xebm\xfb?\xa3\xae\xf5p>9\xbc\xbf\x05\x13\x9b0Cs\xdf?\xa6Tl\x7f\xd0\xed\xd6\xbf\xa5\x84\xca\x15y\x8f\x03@\x87F\x82\x9a!\xad\xc9\xbf\x94\xec\xea\xfeD\xbe\xf0?\xf9\xc3\xfe\x11\x890\xf9\xbf#\x89q\xe0\x82Q\x1d@\x1d\xfb6\x95\x18W\xd0\xbf|\xb0j\x13\xb1\xb2\x01@\xc3\n\xfc\xd9\xf7k\xd4\xbf\x92\x81F\xd3\x7f\x8e\xfd?\\P\xbb\xa24\x1b\xbb\xbf\xc6$#\\\xc2\x00\xe1?b\xc38\xeb\xba\x8d\xa8?"\x14\xc4\xe3]\x17\xec?i3\x1e#\xd0\xcb\xad?\x9f\x91\x92\x96\x8f\xca\xef?O\x14Dc\xd3J\xc2\xbf\xd2\xdd\xc8H\xe4>\xf0?\x11\xf4\xdec(\xb2\xb0\xbf?\xb7\xe5\xc7!`\xea?c\x8c65:\x99\x8c?4I%#b\xd3\xfc?\xe8.;\xe2A<\xca\xbf\x8a\xe0\x14\x94G\xb2\xf1?\x92t\\2\xa2J\xd3\xbf0YNB3\x12\xf8?\xd4\xf4\xdd\xadp\x01\xd0\xbf\xf5]\xb8U\xf8\xa9\xf3?<\x92\xdf.\x9dq\xca\xbf\xf98\xdap\xfd?\xee?\xec\x07\xfc\x8e\xb7\x9b\xb3?:\x86\x16\x0f\xd4\x04\xf7?\xbe\n\xa4\xee\xa6\xe7\xc0\xbfqO+\xacw_\xe4?\x9c\x06\x04\x0e\xe5h\xe3\xbf+\x94\xd0\x82z}\x07@\xe2\xbe\xb6\x11{\xaa\xa0?3\xd4B\x0e\xb3\x08\xf5?&+\xe9\xff\x8d\xbf\xd6\xbf\xcc8s\x11\x9ca\xf9?\xbc{`&a\r\xd3\xbf\x13\x0b`\xbf\xfe6\xff?\x80\xbb>3\xf6\x0f\xda\xbf1\n\xd7\x8c\xa8\x90\x04@(\x95\xcb\xbc\x18\'\xcf\xbf\x15|\xa1A\xaf\xb1\xf8?j\xfd\xbe\x99\x1e\x89\xd4\xbf\xebM\x8a$T\x94\x01@w\xda\x19\xaa\xd7\xa6\xef?\xbf\xaa\x8c j\xeb\x0c@T&\x9bS\x1bm\xd7\xbf@#\xc5\x9fo\xe2\x01@\x98\x89!\xffU\n\xbd\xbf\xd3\x1e\x80\x91\xab\xe0\xe7?\xe4\xaanx\x92\n\xb4\xbf\xb9!\xf6\x00\x08\x0f\xf4?\xc5B\x0eS\x0f\xf0\xb4\xbf\x0c>\x9blWW\xf3?H\x12P%\xb2Y\xcf\xbf\x1d\xa9\x14\x8a\xbf\xfe\xfa?\x84C:>O\xdf\xc9\xbfB\xc8R\xce\xcf\x97\xf1?\x868\x80\xaa!W\xed\xbf#T?^h\x8c\x10@\xd2\xcdl\'\x82\xe8\xc6\xbf\xb4\xafx\x93\xe6\xd7\xf5?\xce\x982<\x8b}\x97\xbf\xad\x0e~l\x1f\x1a\xe5?i\xa3z0\xb4l\xb1\xbf#\xa1\xf6\xec\xcd\x8a\xfc?\xf7\xe4\xcd\xe8Tr\xc1\xbfe\xa1\x14\x8eL\x13\xfb?\x1c\xee\x0e\xae\xb6\x0c\xb0\xbf\xd1\xa0W\xa8\xcb%\xf3?7 \xa6\xbaF\x8a\xcb\xbf\xa74u\x93Zw\x00@}F\x87\x13\x14\xba\x96\xbf\xa8\xffE\x83V\xdb\x01@\xe3y\xcaQ\xae\xcc\xae\xbf\xc2uET\xa1Q\xee?\x1eh\xde\xb00\xe6\xd8\xbf\x7fz\xd0\x82>n\x0c@\x04\xf7+6\xd3U\xbb?\x9b\xa1\x94\x8f\xae\x1b\xb0?\xd3\xc6\x95#\xb0\xdb\xc6?\xc1$~\xaf\n\xa9\xf1?\xe3\xc5\x96\xe5j\x0e\xd8\xbf\xee\x96\xc5\x1d\x96\x11\xf9?\xceG\x12C\xbf\x0b\xd4\xbf\xf9\xd8\xe3z\xb5\xa9\xf6?a\xe9\xc1\xac\xdd\x9f\xdc\xbf\x8d\x10dSS\x19\x08@\xfc$J1V\xef\xc2\xbf\xf0\r\xb9$C\xc9\xef?\x85Y\xfe/\'\xfb\xd5\xbfjm(|\xf6-\xfb?\xbb O\xadX\x86\xa0?w\x84~|,\xd7\x01@\xf2\x94\x9d\x04\xa5\xdf\xd6\xbf\x83\x97\xc0\x12\xd7^\xfb?Q\x91H\x10\x84\x19\xd1\xbf~\x03\xea\xb9\xaf\xd4\xf5?\xa4\xbf\x9f\xb00\x16\xc0\xbfj\x90\xd0\r\xfa\xf5\xe5?\x97\xba\xec\xbc\x85\x15z\xbf1=!\n\xa4\xf4\xee?wt(\x0c=\xdb\xd5\xbf\x193\xc8\x98\xfe]\xf5?\xfa\x98\xdb\xb3e\xfd\xd4\xbf\xe6\xca\xfaa\xb8\xdc\xfb?/0\xc0\r\x8e\x83\xcc\xbf\x92Q\xa28i\x1c\xf1?\x08\x8a~\xdb\x8e\x0c\xc5?A\xe9\x12\n\xf6\xac\xe6?R\xd9\x8cP7\xf5\xb2\xbf\xd8\x94D\x148y\xf1?1\xdcHF\r\xb0\x90?\x1d\xf3\xef\xccJ\xec\xfe?\xdb\x1bV\x89\x14d\xc8\xbf\xe7Q\x06\x94?>\xf4?&\x02\xe0d]\xc3\xce\xbf\xddK\xa2*L\x93\xf1?\xefQoI\xca\x1c\xcc\xbfy\xd2*\xb3\'\xb6\xf3?\xa7~\xb2\xef\xb7\xcc\xbf\xbf}\xbd\xe0y0\x8d\xfa?m.\x81p\x16\x0c\xa9\xbf\xb2\xeb\xb3\x80\x18\r\xfa?\x177\xfezj\t\xe2\xbf$\x19v#oE\n@\x9c\x82zj<\xbc\xd4\xbfX\xb1\x94\x8e2/\xfc?\xca\xa2\xf1\xaaN\x9d\xeb\xbf\xc9h\xa6\xb8\xdd\xb3\r@\xc3s\xbd\x17t\xbd\xc6\xbf\xae\xc4\xd4\xcb\x1b\xe1\xf7?\xd2\xcd\xcb\r\xc2\xd8\xc3\xbf%\xce\x9f\x7f\x04L\xed?\xb1\xb8\xb1\xcbr\xf6\xd3\xbfJ\xfd\xe1\xf2\xd3\x99\xfb?#3\x9fE\xf1\xe9\xd2\xbf\r\xf5\xcf\x1ek\x0f\xf5?\xb48\xa5U]Y\xc5\xbfm\xf1\x1c\xffZf\xf4?m\x9e\xa1C\xb1N\xc1?|\xd0k\xb4h\x1d\xfe??D\xc0V+\x06\xc3\xbf$\x1c\x05\xbaw\x0b\xf5??\xd2D\x18\x08I\xab?\xba\xcd5L\xe2\xec\xc6?\xd1`^\xf1j1\xc6\xbfu(<\xc0?R\xec?\x06k\x9c5w\xe6\xac\xbfN\xf8O~2j\xf0?\'\x88\x93\xd1\xce\xff\xe7\xbf\xc8NLQF\xfc\x0f@\xd4l\xd7\x1aK\xfa\xe8\xbf\x16\\\x94\\\xf1=\x0e@&\xcf\xe1\xff-\xd2\xd2\xbf(\xce\xe6\n\xbc~\x02@\xeff\x90\xe6\xa6\xfa\xed\xbf\x92o\x10\xdep?\x14@\xceg\xb6g\xf1_\xa2?\xa4~\xa7`\xb5\x83\xf6?\x9d\xa1\xce\xf0\xc1H\xcc\xbf\x9c\xacCf\x91\n\xf3?i\x97\x0e%\xa5\x1b\xc8\xbf\xd5I\x96gU\xc6\x00@\x80\xf9\xf59;\xa0\xd5\xbfVU\x8dl\xc1\xc5\xf6?N\xb7\xc2o\x8c*\xe5\xbf\xbc\xf1\x08m\xa7\x10\x07@\t\xd9\\?F\xfc\xc5\xbf\xa8\x96\xd5{H\xe2\xf1?\x0f~\x89\x9c9|\x83\xbf\xf3\r\xe9\xb5\xada\xf0?\x90\xec\xb5|d\xdd\xd0\xbf\xcc\nb%\xcb\xf9\xf6?\x02\xd5z\xbd\r\xd7\xb9\xbf\x01\xe5\x82\xd0AW\xf0?\xe3 \x10\xbcE\xdb\xc3\xbf\x16\xf0.\xbcl\x8a\xf3?vQ\xb2\xb3\xb4\xd3\xcc\xbfhx\xf8\x17\xc1\x1e\xf0?\x80\xe6\x08\x9e\xce\x82\xcc\xbf\xc7d\xf3\xd5};\xfb?!B\xb0\x8a\xff\x08\xbe\xbf\xe2=g\x9c7\x9c\xf8?n\x8b\x0c}\xf9\x8e\xc9\xbf\xc5kS^\xdbf\xed?\xd6\xed\xae\x0b{\xe7\x9f?~\xd9\xff\xf4Dg\xe7?\'\xb44\xa2\xaaO\xdd\xbf\x99\x91\x93\xa7\xa8\x15\x02@\xe7\xb1.\x0e\x18\xc7\xdf\xbfJ\xed\x06y\xce\xfa\xff?\x07\x02\xc0Rh\x97\xc2\xbf\xb0\xbaH\xc8\xa4\xd4\xf4?\x1d\x13\x95\x1f\xa3\xc4\xb7?\x87\xff\xa5\x87\xaf\x9d\xf5?/\xf9\xc7_f-\xb8\xbf\xb6H\x95\xe4%f\xf9?\x12\xaa\xf7>\xd5\xb8\xcd\xbf\xf9A\xad\xd2\x97\x7f\xf1?\xa4\xd5\x8fll]\xb3\xbf\xb5\x06d\xff\x08E\xef?\xe0\xb42\xb9>\xa2\xdd\xbf~\x00\xd4\xf9)c\x03@l\x01#V\x90l\xb8\xbf\x9aC\xa6V-=\xf3?=H\xa0\xe9\xb5\x9a\xb5\xbf\xa7\x9c\xe2\x86\xe8\x04\xf5?dW\xe8 0g\xe5\xbf\xf1\x15o\xe8\xc3\xc6\r@6\x11\xf9\x1d-^\xa4\xbfi\xecy\x03%D\xd9?_\x85\x17\x8b\xb0\xa4\xd4\xbf\xf6J\xd9\x99_\xe9\x01@\xce\x93\xac\x0bJ\x9a\xdc\xbf"\x8e\x19U\x0e\xf7\x01@H\x03p\x94\x0e9\x94?tm\x83\x99\xa2\x1f\xf8?\xe7I\x03\xb9|D\xc1??\x9b\x8d\xb0qj\xed?\x83\xff\xb2\xcc\xd6\x7f\xc3\xbfw\xfc\x14\xa8\x899\xf2?Ub\xa9DN\xa8\xa5\xbf\xfdL\xdd\xdb\x7f\t\xeb?_\x85+B\xf5\xdc\xd0\xbf\xdb\xc5\xfd\x8bmk\xf1?\xf3j)\x16\x0b\xaf\xd7\xbf\x93R|q\x90\xc2\xfc?h\xbf\xf6*UY\xc3\xbfh\xc5\x00<@\\\xf7?\x95\x15D\x1e\xcdz\xd3\xbft0\xf1CHC\xfb?\xe2GJzCE\xc2\xbf\x8a/*A\xfd9\xf4?\xf2\xa0d`b\xa1\xbb\xbf\xf92\xaae\x7f*\xf4?\x03\x96\x0b7\x04\'\xd2\xbf\x11\x1a\x8e%@\xdb\xf9?\xe9\x90\x8cD\x9f\xa1\xb1\xbf%*\x9beS$\xf2?\xee\xaf\x1f\x99\xd4\x1f\x9b?\xd3\xdb\xe7\x84_\xd8\xe2?\xf2\xa0D\xe0\xe6\x1a\xd1\xbf\x9e\x86\xf4\x1cl\xff\xf9?[}E~%W\xc8\xbf\xb0\xf9\x92?\xc5v\xf5?hQ\x84\x1e\xc1\xda\xad\xbfk\xa5\x1b\x0b\x8a\x95\xf6?\x16K\x1c\xa7\x89B\x99?\x90\xdd\xb2\x84\xff\x07\xfa?#\x92\xb1cx\xae\xc6\xbf\'fF\xd5\x81R\xf3?r\x92\xad[\x14\xc2\xc8\xbf\xa9\xc6\x0f\x15\x9e\xb7\x01@\xbb\x95\x07\xa9\x90\x05\xc5\xbfR6\x8f\xbe\x0f\xf9\xf5?\xcc\xa8(T\r\xf0\xc2?\x86m\x9aKWa\x02@\rQI\xc8\xd3\xd3\xc3\xbf\x0bm\xa6\x11~D\xf3?UOu\xc8y(\xa9\xbfz\xe5d\n\x9b?\xf2?\x98\xbe\x83\x93\xcb\x0e\xc6\xbf\xbc\xd6\xd6\xef\xac\xb3\xf9?\x97\x99X\x12\xb1 \xdc?\xc0\xfc\xd5\x93\x9f\xbd\xee?6/P*\xa4M\xcb\xbf&\x1d\xa9\x88\x94\xe7\xf5?\x87\r\x02\x8a(l\xad\xbf\xfe\xe6|\xe7\xb3z\xe1?\\/\x8bo\x81\xad\xd3\xbf\x15\xc3\xc5\xc2\xd3\xf8\x04@\xc9\xb7\xf6M\x95-\xc5?FD&\x83\xb4B\xf1?\x0c\xbc\xf9g\xac\xda\xc3\xbf\x80\x86\x07\x12+\xea\xf1?\x14_3!\xd0nl\xbf8\xe4\xe7lj\x82\xfa?\x15\x86\x90^\xc8\xe4\xcd\xbf\x19]\x7f\xf1B\x13\xf3?T%-4\xf7\x02\xd0\xbf[\x8fV}\xebh\xfd?\xa1n\xe6t\x19$\xd6\xbf\xed[_0-\x8b\xfa?ey\x06\\\xae\x91\xb3\xbf\xb1\xb3\xf8\r\xd9\x81\xe2?% vd\xcc\x91\xa6\xbf\x96\x16=\xd8\x95\xdf\xe5?\xa4\x18\xd1\xcf\xf6*\xde\xbfW\xae\x04\xe0\xec\xa4\xfc?(\xdf\xf0\x05\xe3\x06\xa0?R:\xcb\x8fi\xeb\xdb?\x88{\x95\xdc\x90D\xa6\xbf\xdb\xe5\x1e\xa2B\xb6\xed?\xc0E\x08\xe9\xfb\xf1\xcd\xbfw\xac\xce\x8e\x08\xe9\xf2?\'$P\xae\xc3J\xd5\xbf\xa6\xd3%\xfe\x9f\x0c\xfa?\xd6\xee\x86&\x95\x80\xc1\xbf\xbf\xb8A\xc5\xc3\xe9\xeb?h\r\x00\xfa\x82M\xc6\xbf6\xff\xbeu\x96\xda\xf8?-\xbb\xc2\xc4\xe3;\xd2\xbf\x03\x12\xaa_\x85\x02\xfa?\xa58\xd3\x11U\xac\xb9?\xc6\x1b\xe7H=\xf3\xfd?$=v\xc5\x0c<\xc9\xbfN\xa0X\xbbl\x9a\x05@\xe0\xcf\xeeco\xaf\xbd\xbf\xd2\xf6l\x8fLr\xf5?{\xd8O\xefC\x10\xcb\xbf\x82\xe0&\xf4~\n\xf6?\xf2\xc2B\xc8\xbcO\x87?-\xe7\xde\xe7d\xc2\xdc?CT\xa0\xb6G\xe8u\xbf\xa8\xdc\x92\xf2d\xc9\xf3?\xd4\xc6_R\x8d9\xf1\xbf\xbb,HFd\xbb\x16@?=\xde[O\x13d@F\xe96]w\xc4F@\xf7\x1a\x91Z\x02.\xb7\xbf\x1e\xa2g\xa9a\xc7\xf0?\x95\xca\xec\rY\x99\xdc\xbf\xec\xa1\xac=:\xd5\x03@\x14\xf6\x90\t\xb7\x8e\xc0\xbf\x1d w_I7\xf6?UQ\xf2t\xf8O\xb9\xbf\x8cm\x0fh%N\xf8?\xf6\x17\xd6\x11\xd3}\xc4\xbf\rZ\x9d\xcc\xa9T\x01@\xcc\xdd\x9e\xf7vX\xd0\xbf\x86\xb90\xb3\x0c\xaa\xf7?"tA*\xeb\xa2\x90\xbfi\x0e\xb2=\xbd\xf3\x00@C\xb7}c`\x88\xd4\xbf\xdal[.47\xfd?\xeev#\xfb\xbe\xad\xcb\xbf\x80yx\xee\xbe\x83\x00@\x8f\xc0;c\xc2\xc1\xc1\xbf\x9d\xbe\x83MX\x06\xf8?\xc6\xe3\xff]\xdde\xbe\xbf\xc0\x04\x17\x93\xdf\x8d\x02@/\xc1\'*\xd1w\xc8?n\xf6\xd7b\xfeG\xf6?\x04hV\xdeV\xe7\xc8\xbf\x8c4\x0b86\\\xf8?\x89\x03\x92\xbc\xca\x92\xb7?2\xef\xfeQd\xc9\xd9?Q\n\xaeu\x9d\xe6\xc8?\x0cw\xd0Ex`\xd5?\xa9\xf3{\x99\x01\xe0\x96\xbf4\xae\xe5ig+\xf7?9\xcd\xa76\x0cB\xb5\xbf\\\xea\xaf-\x16\xb1\xfa?\xaa\x1a=~\xd7G\xbe\xbf\x9e\xef\xd3\xd5\xed\x00\xef?\xa4\xe9\xfbA\x96\xc2\xc2\xbf\xc6\xe9,\xc6\xa9\x8b\xf9?\xf69\x817X\x9f\xd1\xbf\xb6c\xb9oN.\xf2?\x089kU\xfd@\xc6\xbf\x8b\xda\xaec&/\xfd?\xc8\x9bi\x05\xd6\xa0\x8b\xbf}\xe3\x93\xafb\x89\xd1?\xc1\xedq\x11\xdb\xb2o\xbf\xb8\xbe\xafJ\xcc!\xf6?\xa0\xb6\x8e/W\x03\xc2\xbfh0\x8b\x8c\x06P\xfe?$\xa9O[\xfa2\xd9\xbf\xf2NEd\xf0^\xfb?\x84\x03*\x11\xb8{\x93?\xbd\xf5N>\xecG\xed?\xd1\x1b\xd7#\xb64\xb1?@\xddXr\xcd\xfa\xe6?\x89\xce\x1b\xd8O\xbe\x87?\xed\xc21\n\x11\x89\xc5?\x0e\x06W\x96\xd1,\xe1\xbf+r&\xfcw\xd7\x00@\xff\xa4\x16\x1b3\xf0\xd0\xbf>Z\xf9kU\xfa\xf8?>\x8b\xe3YC\x07\xb0\xbf\xb3\xc0V\xb5\x88\x08\xf6?\x8d\xa4\xdb\xfe\xf7\xae\xbb\xbf\xc2A\xbf\xb8\x14\n\t@2qc\x7f\xbb\xda\xae?J\xa6\xa7\xb4j#\xee?&\x0c\xf3\x06\xf1\xbf\xd2\xbfc\xc9\x1e\xf8NB\xff?\'\xd4P^OG\xbf\xbf\xd3\xebt\xe3\xa9\xa5\xea?\xe9\x93P \x9fP\xc7\xbfL&6\x13\xd1\xe2\xf7?\xa8m-~\x17\xb2\xca\xbf>\xc6"\x12\x94\x1c\xf5?\x1d\x8e\x05\xd8O^\xd3\xbf\xc8FM\xa3\x81\x19\xff?\xe7\xf6\xc6<\xbb-\xaa\xbf\xf8]\xa5\xea\x1fp\xe9?\x94\x15\xb7\xf4\xa1>\xd4\xbfw[K\x83\x95<\x01@U\x81\xb7\xcab\x0f\xc4\xbfM\xe0\xe5\x9dT\xfc\x02@\xa3\x0c\x82q\xca\xe5\xc9\xbfJ\xfd\xdc\xda\xf1\xae\xf5?jFi\xc8\xa3\x07\x8f\xbf\n\xd3\x97&\x8c\xd2\xf2?Qg)\x88\x1a \xd5\xbfvA\x9bM\x02I\xff?\xb5\'\x963\x86\xb5\xcb\xbf{\x7f\x15e\xd2\x9e\xf3?\x94\xc1\x80\x83S\x93\xce\xbfS\xf5b\xceB,\xfc?\x13R\xc7\xd5\xe5\x84\xf1\xbf\xfc\x84N\xec\xcdc\x12@\x8b\xbc\x91L7\xc5\xc0\xbf\xc2G\x0f=d!\xf2?\xcb\xba\xba\x9d\xe3\xe1\xa8?\x80\x1f\x16W\xffj\xf7?*P1\x9a&\x04\xb6\xbf_\xd2\xb5C\xacL\xf2?\xae\xc9\x18\xcc0\x93\xd5\xbf\x9bq\xc4\xe0\x04\x02\xfd?1\x04%\x85\x11\xc1\xc2\xbf\xbc\xea\xd8\xb5\x1a\xd5\xf2?\xec\xcd4\x00\xcc\xa6\xd4\xbf\x99\xcd@\x08\xd5s\xf7?C.De\x17\xa2\xc4\xbfi\xf4\xe3!\x13\xe5\xfc?t\x19\xe1\x15\x03\xc8\x99?\xacl\x1fAa\xd9\xe3?,q\x15\xa7m\xbb\xb0\xbf.\xa8-\xf3g\xc0\xe6?d\xd0\xfdT\xd1\xb8\xc5\xbf"\xfa8X\x98\x08\xf5?\xc4 \xa2\xc9\xa8\xdb\xbe\xbf\x01AL\xccXf\xef?&\x9b\xa1V\r\x19\xb2\xbf\x9f\xe8\x9a\x11\x19\x92\xf3?\x1b]\x89|\x08\x07\xe3\xbf\xc5In\x98q\xc6\x06@P\xfaSK{\xe3\xd9\xbfc\xe2<VW\xf9\x0c@\x9a?g\x89\xd3\xa5\xc4\xbfU@\xfd\x96${\xfc?\xee\x9c1\xbd\x98\x05\xc2\xbf\x93\xb0\xad\x07\xa3\xec\xe6?AZ8s\xea\x0b\xc9\xbfmJ\xb3\xf5\xa5/\xf3?\x1e,\x8dG\x81\x8a\xbc\xbf{\xe0\xaeu@\xf4\xee?k~\x9c\xf0\x92\xdc|?(\x8f\xe7)\x9a\x83\xf9?s\xceDpir\xe0\xbf\xabr\x9a\x18\xb8\x81\x02@\x1e\xf0\xf2?\'X\xa7\xbfIde|vK\xe1?\nH\xf5K@\xd7\xbd\xbf\x16)6cc\x05\xe4?\xb9\xc9n5\xdfW\xa5\xbf_\xde4\xf3q\xbb\xfb?\x8c\xac\xf0\xfe\xfe\xe8\xc5\xbf\xd3\x06[\x01\xbe\xb4\xf8?\xa3\x95\x1b\x90\xd2\xdd\xaa?\xb5^\x80@q\x03\xf7?\xc9\x84\xc5y7\xf6\xb9\xbf\xd7u\x8a\xa8\xb2A\xf6?n\xd1\x1e\xa1I\xc3\x86?\x03\xb3\x9cd\x11\x9f\xe4?=\x84\xa9\x98F\x83\xc4?\x0e\x88\xe0\x87e\xaa\xdd?\x8e\x89\t\xe1v\xc3\xbf\xbf\xf5\x0e\x91@{\xc6\xf2?K\xad\xeb\xd5\xd8\xdf\xce\xbff\xd5\xcf+4\xfd\xf4?\'N\xff\x08\xdez\x94\xbf\xc7\xa4U?\x18&\xf2?\xb3\x86\xb2~v#\xc2\xbf\x9b\xc3\x19?\x87a\xf4?@I\xe2C\xf4.\xa9\xbf\xdeS\xe3u\xc7T\xf3?\x13\xd3\xb0\xf3\x0c\x9b\xd8\xbf\x9e\xce\x85)i4\xfe?ly\x0bm\xcb\xb6\xb3\xbf\xb2\x84\xd8\x858\xb1\xe3?I\xe64\x9aK\xaf\x96?\xf3}\x93\xbf7\x01\xe6?\x1b&^\xaeZ\xcd\xba\xbf\xc4Z>\xdc|\x1c\xfe?4\n\xfd\xdb\x02\x9d\xa3?\xb1\x10X\xefX\xe6\xf3?\xa5r\x0f\xb5\x85\xa6\xc2\xbf$\xad\x8e\x82"H\x05@B\xe3\xc8f\xc4\xae\xb0?|\xd56\xe3+\xe3\xe1?\xec|\x17\x98\xc9\xde\xe1\xbf\xdcYN\xb0qG\x01@o\xa8\xd1\x8e\x99L\xcc\xbfv\xc7A\x93\\}\xf7?#\xa2\xe1\x1d\xfe?\xcb\xbfoHy,\xff\xb9\xf5?\x96\x02\xc8\x96\xee\xfe\xbc?v\x0fh\xc5\xdd\xe4\xe1?\xde\xa3\xc0\x8fw\x97\xca\xbf\xfb\xb9\x94JL\xa1\xf4?\x04\'[j\x95\x03\xaa\xbf\x96\xa9R\xe2\x93\xcc\xe8?o\xcf\'\xc1n\x0b\xe3\xbf\xcdL\xfdK\xdd8\x15@*x\x8f\xa6&\xa4\xa8\xbf\x08\x85?Q\xd0o\xf6?\x9f\x1bRO\xa3g\xd4?\x82}\xbd2\xc3*\x06@\xef\xd2\xadH+\xf8\xd8\xbf\x03\x9d\xba\xaf\x92F\xfe?t\xb4`\xe4\xe1L\xcc\xbf\xf7\xd4\xac\x1d\x9e\xb2\xfc?|V:8-J.@\x82F\xcc\x9f\xd3\x17\x0e@\xb1\x9e\xca\xb6\n\x12\xb6?)\xfbe\xeb\x7f\x95\xfe?\xf4u\xf1\xe4\x90\'\xe0?\xf3\xb2*\xd0`l\xef?\xd0\x1b\x9a\x01\xab\xa4\xdb?("\x0c\xcb@\x9b\x00@)\xf1\xf9/\x15\x8e\xa4\xbf\xa62\xbfg\x13n\xe8?\xac$]\x1e>1\xd1\xbfd\x06\x9f\xc9\x84\xeb\xf7?=\xb0\x10Q\x89\x0b\xe4\xbf\xed7\xb9C\x917\n@\xf3\xc8\xb5\xcc\x1c)\xd3?\x92\\6\xb3\xca\x83\xce?\xeaH!\xcdJ*\xcf\xbf\xc4\x86{\x9dkb\xf5?s\x12\xbd}\x98\x8e\xac\xbf\xbb\xea\x04e\x04d\xf7?\x03\x8f\xfc\xcd\x86F\xaf\xbf\'o\x90\xea\x07P\xf2?\xe2\x96\xc6\x1e\xcd\x0e\xd0\xbf\xba\xf1\xb6\xa4\xb54\x07@\xda2\x15\xd9\xd9W\xd4\xbf\xfbHq\x12\x9d\xc0\xf5?b\x8dU^[-\xc2\xbf\'PU[\xcdP\xf6?w\xc4\xeb\xff\x14\xeb\xc2\xbf\x0e\xb6r\xe5h\xa7\xfd?\xb1h\r\x16ey\xc9\xbf\x13\xd9\x12\x03\x8e\x1b\x01@\x9dU\x98\xa6\xf8\x9c\xd4\xbf\x08\x9b\xe7\xe9qI\x01@\x9f/\x8c\x0f\xaf\xbd\xe0\xbfn\xe7\xf0\xf8!T\t@\xb2\x0b\xa3\x90\xda\xe1\xcb\xbfwr\xf4x\xc1h\xf2?Z\x00\xf3\xb0\xff\xa3\xa1\xbf\x14\xc6\xeb\xd2\x9f\xdb\xfd?\x9f\x95\x8a\x9a\xd8\x13\xd3?>\xec\xda\x9c]3\xe8?\x85l\xbbKC\xaf\xbb\xbf\xf8^\xe4.\x97\x02\xeb?K\x14\r\xf71N\x8b?}"\xb16CO\xe7?mG)\x04\xac<\xe9\xbf\x1c(\x8d\xa9\xc8\xe6\x08@e\xd9\xf0\x9c\x01\xe1\x97?\xdd\xff\xd9\n\x83\x83\xf1?_A\x9b\xf27\xaa\x82\xbf!\xa9\x10A\x92-\xfd?i\xa6\xe7(Vq\xce\xbf\xb4>\xc7\xc9k\x1a\xe9?\x1a\xcaZ\xe0\x98\xcf\xb6?lT=k\xa4`\xe8?5\x95\x9d\xba\xca/\xca\xbf<\x90G\xb3\xf2\x1e\xf4?f\xc1\x91\x89V\x83\xb5\xbfk\xdc\xb6\xde^\xf7\xe8?\xd4\xf9\x1b\xfdr\x1e\xdd\xbf\xdbEI\xcf,\x82\x04@\x07N7\xe1\x17\xf9\xb7\xbf\xce\xb7\xe1\xb9\xf8B\xf2?\xb4"\xcd\xfc\x1b\xa1\xa4\xbf\xa8\xbd,\xd5\xf1\xd2\xfe?>\xd8\xec1\x00\xde\xc0\xbf\x7f\xb3\xe0\xd3\xc3J\xf8?\xab;\xf9\xeb\xbdt\xd0\xbf\x01\x08s\x99\xee\x04\xf7?D?\xf6e\x1c\xf9\xd2\xbf\xd6v\xb29\x940\xf4?\xdc\x15\x9e_&\xa2\xd1\xbf\xc1\x07n^&\xc9\xf0?\\\xca2\xc2\x1b\xf6\x01@\x9a\xbbfS\xbcr\xea?\x16\xcd\xca@\x94\x8b\xc2\xbf\xe6\xe9]\x9c\xcf\xaa\xf8?\xaa\x91\xf4\x8b\xea\xc8\xd4\xbf]=`\xa6\x92\x08\xf9?\xbe\xa0)\x8a\x85\xca\xb0?E\xde-\x04\xe0_\xf1?\xb0sq\x15\xb2\x84\xb1?\xa8\x86Alv\xc9\xf2?\xd1\x9a\x03\xf9W\xc0\xc8\xbf\x98d\xbc\xc6K\xc7\xf8?\x7f\x9fX\xb6\xcf\xf0\xd1\xbff0\xdd\xcd\xb4\xc5\xf7?\xd2\xe6\xbe\xe9fi\x9f\xbfBS\xea\xbbI8\x10@\x9c\xf0\xebG\x1e\xb0\xc8\xbf\xb7\x07\x88\x13\xf5\xeb\xfa?G\x9ca\xf1\xc7\x8d\xb9\xbf\xc7\xbb\xba\x97\xa7f\xeb?\x86?wc\x94\xec\xa9\xbf\xe2\xa66\xd6\xa0\xb4\xe7?\x17\x9b\x81\x0b\xef\x17\xd5\xbfi\xed\x1d%\xc0\x8f\x02@\xcd\x9cL\x0b\x7ff\xc7\xbf$GOl\xdaf\xef?\xf6\xc3\xd2\xaf2p\xd4\xbf\x91\xaan\xf2\xf25\x00@\xc9\xc5\xd7\x84\xf0\xfb\xc8\xbfE\\Y\x850\xfc\xfb?\x01\xca+#5P\xc4\xbf\x98+@+\xb8z\xf5?\x14\x94\x89!\x8aZ\xb8\xbf\xf6\xa4\xb5\xdc\x8bE\xf0?(\xc7\xcb\xc8\x08\xd7\xa1\xbf\x10\x02\x7f\x8009\xe0?\xd8~\xf2\x16\xdb\xd0\xa3\xbfv\x0b&L\xbc\xa1\xfa?\xbc\x1c?`\xb2F\xa6\xbf\x18\xa8+W"r\xf6?\xf5)\x0e\xbf\x99\xd6\xb8\xbft=!v;\x1b\xf2?G\xbb{\nvn\xc0\xbf\xf3\xe8\xa4+X\xec\xec?\x1a\x11\x14\x17\xbaB\xb2\xbf\x15\x01\x7f+\xbd\x8b\xf1?\xa1\xbe< \xb2\x04\xe3\xbf7\x9a\xd5\x1a\x00.\x10@\x13\xb5qL\xee\xb8\xc9\xbf\xc3H\xca\x1dY\x1b\xfd?_\xcc\xf1\xf8SM\xc4\xbf{\x02\\\xc0\xc7\xa0\xf1?\xfaZ\xbe\xbd4\xab\xdf\xbf\xfcm=?z\xca\x04@r\x97\xf5\xca84\xc5\xbf\xc7\xfd\xf6\xa3\x93\x8f\xff?\x18\x8baI\xc2R\xc5\xbfF\x9d\xb4\x98\xb7\x08\xff?\xe1\xf0\xd2>\xa1\x0b\xd7\xbf\xe7 /*\xe9(\xf8?I\x83\x8b\xbb\x05\xa9\xda\xbfl\xd5\xe1!\xe6\\\xf8?'
p221
tp222
bag2
(g3
(I0
tp223
g5
tp224
Rp225
(I1
(I2
I319
tp226
g12
I01
[truncated: 379,624 more chars]
