# Supplementary material for: How biological attention mechanisms improve task performance in a large-scale visual system model
Source: eLife journal article supplement (doi:10.7554/elife.38105), 2018-10-01
Supplement: supp [file elife-38105-supp-v1.zip › elife_poa_e38105_Figure_7_source_data_1.txt]

(lp0
(lp1
cnumpy.core.multiarray
_reconstruct
p2
(cnumpy
ndarray
p3
(I0
tp4
S'b'
p5
tp6
Rp7
(I1
(I9
I64
tp8
cnumpy
dtype
p9
(S'f8'
p10
I0
I1
tp11
Rp12
(I3
S'<'
p13
NNNI-1
I-1
I0
tp14
bI00
S'6\x11\x80\xa0iY\xc1?<\xd1\xdaF\xdb\xaa\xbb\xbf\xe5mW\xa9\xbfc\x95?c^e#\x03\xb7\xeb\xbf\xf5C\xe47\xde}\xa5\xbf\xe4\ti\xe0\x95\xc1\xa0\xbfk\x96\xff\xa3\xab\x89\xd3?x\xcfT`\xe5)\xc1\xbfv\xbc+,\x84,\xc8\xbf\xd89\xba\xc6\xa8!\xbc\xbf\xef\xb8?\xf3\x97\'\xf2\xbf\x19Q\x13\xf2\x95Z\xc0\xbf\x8a\xb5<pZ\x87\xc4\xbfw\x9e\xbf3S\xd6\xb2\xbf\xdbc+4\xe8\xdb\x85?~\x1f\xb8\xf2\xeb1\xca\xbf\xa4\xbc\xa2\xd7\xd4\x08\xc3\xbf\xf3F\x9d\xe2\x1c\xd9\xb6\xbf3\xbc\t\x83\x9e\xe3\xc5\xbf\xee\xbemZ\x90\x01\xc1\xbfO\x9d\r\x02j\x97\x9f\xbf\xb2BG\xad\x10)\xc8\xbf\x17\xfd\x9d_\xd4.\xb5\xbf\xcf\xdc\xe6\xa4\xcf\xc4\xb1\xbfS\x94^\xb1\xfe\xe1\xa7\xbfh\xd5a\xf7\x03.\xb4\xbf\x14G6\r\x04\xd9\xe0\xbf\xff\x8e\xe9\x81\xe1\x11\xc7\xbf[\xa6\x06UC\x0f\xde? \x05"\xee\x84p\xc5\xbf#2\xe0\xb5}\xc6\xc2\xbfi\x8d\x7fM\xd2L\x88?\x1b\x01OW\x86\x80{\xbfR\x91\x8f\x9d\xaf \xc2\xbf\x18|f\xc4m\xaf\xe6\xbfx\xc04c\x06\xf6\xe1?\ng\xc2\x9eN\xe2\xa2?R\xaej\x10\xeco\xe8\xbf\xf2p\x07\xc9\xe5\xb2\xc3\xbf\xdf \x0e\xb6fO\xc0?\xba\x90M\x83~\xdd\xc4\xbf\xdf\x8e?+\xa9\xf3\xd3\xbf&\xefD\x0b\xb3\n\xda?\'\xa7\xc0\xc8\x98\x9e\xbb\xbf:\x8d6\x06b\xfa\xa0?\x12@\xc1\x99\xd5l\xd3?\x07\x9c;\x94\xf7\xe1\xc4\xbf\x1b`\xf3L{p\xd2\xbfC\xadV\xa4\xb2\x1e|?^\xed\t\x0e\x14Xd\xbf\x87\x00\x8fah\x02\xb5\xbfG\x9c\xa1{\x9ah\xe6?\x1c\xe3\x92\xdb\x86\xc6\xc2\xbf3\xcfp\xad\'\xdb\xc1\xbf\tq\xc5\xbf\t\x7f\xae\xbf\x03\xa3\xb7\xd1\x01\xff\xa1\xbfj\xa3\x14\x16\x03Zn\xbf?9%L;\x8d\xae?f\xbb\x93\xe4\xc0\xdb\xe8?\xca\xa6M\xff\x01\xe5\xc5\xbf!b\x8aT9.\xe3?\xee{p\x82\x04\xa9\xc6?z\xff\xe3\xe9r\x8f\xd4?\xb1]V\xda\x89{\xd9?\xb6O9\xefe\xe8\xe0?\xe8\xf9\xd0\xf7t\xf8\xa9?\xa4\xd9\xbb\xfb\\m\xb5?k\x1c\xa1\xe3!\xf4\xca\xbf\xf8Q_\xfeT\x15\xc2\xbf}\x81\x8fR\x80\x06\xbc?87\xa6\xbb\xb6\xb7\xc5\xbf\xc4\xcf\x10\x0fY\x98\x87?\xc07\xea\x80\xf61\xcc?\x842\xf0\xde09\xae?\xd0+\xe4\xb4\xee\x18\xe0\xbfi\x02|\x8f;\xe6|\xbf\xbc\xbd{\xe0w\xcc\xb5?G<tl\xcf\xafC\xbfV\xf5\xe2\x07!\xb7\xca\xbf\x15\x8d\x10\xb8\x8d\xd3\xd3?\xde\x18\x0bK\xe3g\xb4?\xa7\x06L\xf2\x0b\xda\xc7?\x16{\xbe-\xedZ\xd4?\x80*\x9f\x07*e\xb4?\x8di\xb5\xb1\x19\xcb\xc1?\xda[\xb8\x05;\xe8\xd4?\x0cD7\x9f+\xe8\xaf?\x1a\xff\xcf\x95\xc8~\xd4?\xe1\xb0\xf1\xf72\xa4u\xbfS\xa0\xef\xebQsa?\xa8\x9a\xe7)\x91\xca\xf3\xbf!\xa4p\xca\x0b\xfd\xb5?\x18\xc5\\\xd7\xb9:\xbd?\xde2\x1c\xdd\xc0\x89\xb6?\x83\xcf\x91\xfb\xd3\xcc\xc2?\x1c\xad\xdd\x1c*\xe3|\xbf\x0f\x8f\x13C\xd8}h\xbfJ\xa8\xa2\\\x93\xdf\xce?\xb3\xf3}\x00\xc97\xf2\xbfud\xd6\x8e\xc6>\xe6?\x90\xd3\xc5\x7f\xc38\xb1\xbf]\xf1\xc6\xaaS\xcd\xca\xbfDI"\x04\x86\x1e\xa6\xbfk\xdb\xa2A\x83x\x95\xbf\xa0nP\x86Y\xa1\xb7?Y\xf6\x84\xdfeY\xa3\xbf\xdd}\x94\xb8\xf01\xc4\xbf\xb2\xe5?_\xd9D\xd2\xbf\xe7\x08\xe6dTb?\xbf\xa7n\x03_9*\xd5\xbf:\xf6"\xefx\xc1\xb1?f\xd2|\x1aa\x02\xcc?\x10\xf4O&\xcb&\xb8?\x8f;-dQ\xaf\xac?\x9e\xfc\xe6Fpz\xa1\xbf\x97\x16\xb8~\xa8\xb5\xe6?G\xda\x9aH\xe3\xf8\xbc?\x1c\xab\x12\x07\x98\xc2\xbb?\xd9\xbb\xa9p1B\x9a\xbf\xe4\x0f;\xf7\xc6T\x85?\xac\xf9E\xb4\xe8\xe5\xd5?~\xa9\x8dK\xd1\x17\xd5?\x90\x14\xd5\x1c\x81\x96\xe2?y}W\x80j\xcb\xb4?\xa0\xd5\x93cmD\xe6?\xddF \xe2;\xe5\xbc\xbfH\x19\x9f|\xd0,\xc8\xbf\xb5E\x97q\xd9+\xd7??\x96Cw\xef\x99\xe1?>\xd3\xe3\x02i,\x9b?\x044\x1d\x07\xbf\x97\xb6\xbf\xed \xb6*c8\xc5?E\xc0\xae,\xaa\xec\xde\xbfq\xd8\x8d\xc6\x1e\xd6\xb5?\x18\xee\x1c\x9a\x15\xc0\xe4\xbfD\x9fC\xfc\xfar\xb2\xbf\xa1\xa9V\xc1#\xf5\xb2\xbf\xd01\xf0U%P\xa9?W\x05Fk~=\xa6\xbf)\x13\xf2b\x00\xf1\x98?\xcc\xb3\x8f\x9a\xa2\xf1\xbf?\xb25\xe5\x93\xf7V\x94?\xeb[\xfb\xcd\x03\x86\x9d\xbf\xaa\xd1\xffl\x07\x15\xb6\xbf\x94W\x94\x9a\xdb\xa8\xa5\xbf\xb8\x01\xcf}R\xf6\xd3?\xa6\xf9\x0f\x98\x1c\xae\xb0\xbf\xad\xc1\xdd\\&\x04\x9a\xbf\x9f\xae\xaat\xb5E\xbb?\x06\xc0)$\xef\xa1\xd5?&\xc6\xe5n.\xba\xb1?\x83\xd2\xb9\n\x82\xda\xb8?/\r\xde\xcf\xa4\x9a\xb0?\'\x88\x0e^cS\x98\xbf\x9aX\x88\xcb9\x05\xec\xbft\x15\xc2>4\xa3\xc0?\xf9|y\xd9\x0f\x94\xa4\xbfL\xc0\x0c\xc0\xda\xea\x95?ZtL\xd0\x86\xdf\xd4?\x98Y\xea\xd5\x82\xda\xcb\xbfd\x8f\x91\xa4\xda\x08\x82\xbf\xa9\xc0\xf7|\x83y\xcf\xbfC\xe8\xafJ,\x96\xe2\xbf\xbf5\x85I\x03Q\xe1?g\x0e\x8a\xb9\x1c\x89\xb8?\x17`$\x1e\xb7\xa0t?yI\x90\xcf>\xb7\xb8?\xa5\x02\xa1\x13\x83Q\xac?\xa8\x95\xe7\xe7L\xbe\xbd?$\xbf\xc4c\xc8\x07\xd0\xbfW\xba3\x10\xc8T\xea\xbf\xcd\x85\x8f\x89-\x97\xb7\xbf\xf7\x1e\xba\xedI\xd0\x95?0\xaaU[\x96.\xf1\xbfw>,\xd2t\x83\x81?\xb6\xee\xe1\xf3,\x10\xde?\xc4\x8b\xc6J\xadv\xac\xbf\xf9z\xac\xf9+\x94\x96\xbfoA0\xa9\x84\xad\xb2?\x9f@K\xa8*\x19\xd7?\xc4\xa9\xfa\xa9\x8c\x16\xb0\xbf\xd7?D\x87\x19\x7f\xb2?B\xb6Y\x90\xaa\xaa\xd1\xbf\xd0<\x8d\x1bQl\xb6?\xa9\xbbIn\xe7\xa1\xc1\xbf_3B\x7f,\x1e\x88\xbf\xa4Wo\xfc\x17\xf5\xbb?\x1e\xb83T\x98>\xb5?\xf57\xd2\xa6\x85\x19\xe1?\xed*\x1c\xae\xc1\x88b\xbf\xfe\x80\n\x9a\x8f\xc0\xec\xbf\xd1\xd9.4\xdd\xf1\xc1\xbf\x14\xe8\xdbW\x90\x85\xeb?\x18Pa_\xe4\xcf\x96\xbfb\xd4p\xcf\xef\xe1\xc1?F\x91Rt\xb5\xba\xeb?\xa1\x04l@\xe4\xea\xcd\xbf\x8cTz\x8c\xf8J\x82\xbf\xa1e\xbeKX4\xeb\xbf\xb8\x1a\x04\x01\'\x03\xae\xbf\xbc\xe6\x05\xfe\xc3\xcd\xcd?\xc8"\xa7\xe1\xf7\xd5x\xbf*.U|1:\xe6?|\xbe\xb2~?\xcc\xd4\xbf\xde\xb44\xb7\xe0=\xc2\xbf\xb5%d\xe6\xa9\x97\xbd\xbfN\xee\xa6M\xbf\xd0\xb7\xbf7\x88\xc7\x81R\xf6\xce?sT\x9a\x1c\xb0\x94\xc0?\xa5\x17+\n\'\xaa\xa7\xbf\x15\x96\xf4\x05\x81,\xc8?\xd4l\xa5\\o\x84\xab?(\xd8\xd9\x0e\xda\xe4\xac?\xf6\x10!<j\xf5\xe5?\xc2\xcf\xf0\xb3!\xb1\xa9\xbf\x1fJ\xa9lP\xd2\xd2?\xe3z\x8d\x89\xb2\xd8\xc2\xbfF\x1c\x9f?7\x82\x91\xbf\xfb\x9d*W\x8f"\x85\xbfU\x93\x8e\x82\x9f\xbd\xb2\xbfeh\xcb1\x9cu\xd9\xbfV\xaf\xdd\xee(\xa8\xa7?c\xa4l\xa1\xd7>\xd7?a\xaf\xd7o`\x03\xd3?\x93\x03\xb7 \'\x15\xbf\xbf\xb7\xe6\x873\x8e#\xd2?\xdb\xb5A\xdc\x85&\xce?\x95G#\x19\xdf\xda\xe1?\xcd\xd3\xd9%Eu\xd1\xbf1\x81\x87X+E\xe6?\x92+x\xd0V\x03\xaa\xbf\xea\xb8}\xd4\xb2\x94\xca\xbf\xc5\x93D\xd5\nM\xc9\xbf\xf2z\x1c\x88P\xef\xbc?\xe6\x03\xb5H\xaa%\xf0\xbfz\xc7[%\x0c\x0e\xc0\xbfEL\xfem\xd5\xb4\xcf\xbf\xa7\xb6\x90\x08\xb7\xbc\xec\xbfQ\xb4\xbao\xd8\xfd`\xbf\x0f\xfa\xcch\n\xc6\xed?\x19<Zw\xa6\xc2\xc3\xbf\x8d\xcc\x8e\x8a\x08\xf4\xba\xbf\xa5 \xdd\xf2\xcdo\xc3\xbf\xf1v=A\xf4&\xcc?TT\xe0z^\xa2\xc2?5\x93\xe1\xac2\xe4\xae?\xdc;\x10?v?\xc0\xbf\x05\x1c\xdb/0X\xc0\xbf\xd4ES\xcfUP\xbe?\x8e\x8en\x1e\x07)\xb1?\x1cd2r\x97\xc9\xc3\xbf\xe6+\x94\xe9\x84U\x8a?{\x8e\x0e+\xfc\x0c\xe0?)\xa8\xb5\\\xa8_\xcd\xbf\xbc\xd3u#\xf9\x14\xee\xbf-w0\x0e\x94P\xd2\xbf\xbcK\x1d~\xee\xe0\xdc?\xdf\x16\xe8\xd2Ee\xc8?\x1e\\\xd7F\x8b\x9d\xa2?\x83;\x03dy\x18\xed?p\xda\xdb\xbcM\xc8\xd2\xbfG\n\xbf\x1c\xeb{\xab?\x06@\xf7\xad\x95\xfc\xc8\xbf\xdd\x1c\xf7(\x0f\x81\xcf\xbf\x99\xf0\xf25\xd4\xb6\xd5\xbf&\x9e\xa8\xd0Y\xe3\xc7?P\xe3\xeaN\x92\x92\xeb?z\x1f\x8f\xb5\x0eQ\xa8?\x02\x96!\x07,\xae\x95?P\xaay\x9apP\xcb?\xf0j\xe0\xe2u\xb5\xc5?T\xafQ[[g\xd6\xbf/\xff:\xd3am\xcf\xbf\xf4\xab1y\x0f\x14\xbc?\x93g#\xf8\xba\x9e\xc4\xbff\xce\xb5\x8f\xa8\x0f\xd1\xbf,p\xb4\x96\x1e\x9e\xc8?\xfc\x86y\x0f\xd1\xf0\xcb?a\x16s\xb0\xb5;\xc5?\xa4{\xe8\xc8\xb8\x8b\x9c?X\\\x9a\xb2B\x89\xc8?,6\xe0\xbd\xffA\xcd?\x98\xda\xa3\xb4\xa32\xe2?Pf[\x7f<7\xc4\xbf\xe4\xd2\xac\xfc\xf17\xdd\xbf\xfe\xf6WU$y\xce\xbf\xcaI\x1c_9\xdb\xe2?%\xfcrbvv\xa4?\x91\xba\x91\r\x820\xca\xbf\x91q\x81\xf7\x80\x11\xd0\xbf"j;k\x19S\xe5?J\x1f\x02H\x04\xd5r?\x8f{j\xed\xf3\x93\xca?MM\x92\xab\xdc\xf0\xe1?V\x9c\x1c\xb2+\xd0\xd7?\xaf\xb7+\r\xa9\x03\xae?%\x05\xfd\x81c\x13\x92\xbfD\x82\xed\xe2\x05\x96\xc3?\x0b\xc9iy\xe1S\xd2\xbfH\t\xb9/\xfcT\xc4?\x8e\xc4QU\x0bV\xbb?\xa2r[\xa3\xe1H\xc5\xbfJJ\x94\xd4\xdcc\xce\xbf\x81\'\xd1\x9d:_\xe9?25_\xf3\xd4\x1f\xd9\xbfS\x87\xa3[[e\xb5?#2t\xda\x8bD\xcc?`3\x99\x05\x8a\xfe\xde\xbf{\xc4n\xb0a\xad\xd2\xbf\xac\x11\x92Z\x90\xf2\xc6\xbf\x102\xe9\xddZ\xd1~?:\xad\xf9\xdb\xe3E\xcc?\xd0\xd6F\x8dzn\xde\xbf\xad\xde\x9b\x9dr\x88\xca\xbfj\xfc\x83\xf2\x15\xbc\xed\xbfP\xb9u\xfb\xb6\xda\xca\xbf\xfa\x81:\xe4\xb7\x0e\xa6\xbfK\xb4\xe3@5\xf4\xa5?F\x19M}\xf0T\xd0\xbf9\xbe}K\xf1\x11\xea\xbf\xdeS{\xde\x82>\xcd\xbf|\xdaH\xfb\x8f\x17\xc9\xbf\xb5:c\xd6X\xf9\xcd\xbf&5\x90\xc0\xdb\x80\xde?\xe4v\xc3\xab\xb0x\xd8?\x8azW\xbf\x10\x14\xc2\xbf\xe0\xc3\xc4\xec\xb4\x88\xbc\xbf|N\x8f\xae\x8az\xd7?\x00N\xc1\xf4\xba\xde\xcd?\x89{\xd0\x8b\xd0R\xc0\xbf=\x16MN<;\xe2?\xcd\x87\xc7Mn\x9a\xbb\xbf\x94\\\xbd\x1dJ\xe7\xc7\xbf\x01\x04\x0f\xec9A\xcb\xbf@\xce}\xc7i\n\xc4?\x9eq\xdd\xd3\x07\xfc\xc4?F=\xa5Q\x873\xd4?\xef\xfc\xe5\xefx\x04\xcb\xbf\xc9\xfcU/\x0e@\x9e\xbfgr\xe4\xfe\x91\xf0\xd5?\xff\xaa \x83\xcd4\xc7\xbf[u\x83\x01s\x11\xce?M\x93\xdbE\x90\\\xc6\xbf\xa2\x86\xdb9\x8b-\xc2\xbf\xebJ\xb7\xb9|\x9d\xd4\xbf\xf5\xcf\x1a\xba\x8aN\xcd\xbfl\xd7\x0c\x14\xfb$\xe5?\xc1\x8e\x89Ri\xed\xc4?[\x18N\xe7\x05\x8d\xbd\xbfWt\x88\r\xc2\x1f\xd4?\x11\xadJz\xb2\xa6\xce\xbf0\xc7\x9d \x85\xb9\xa5\xbfv\x86\xd3\x03\xf7\xe0\xd3?\x0b\xa0-\xff\x8cm\xbd?\x1d,\x81\x9f\n\xaf\xe3?<\x82\xf8{\xeaw\xe9\xbfw\x96\x92!\xae\xd5\xca\xbfK\x96\x1a\\e\xe2\xe1?Y\x1d\x8e$\xd3q\xcf\xbfh\xaa\x1f\xc4\xa9V\xb7\xbf\x1f\x88\x9b\x16\xb3h\xbd\xbf\xd3y\x88\x0e\xd1\xc0\xc5?\x00\xd9\x0eL\xb6\x19\xa0?\xbb}\xf8T\xdf\xda\xd2?l\x11\xea\x1d\x0e\x82\xd6\xbf\x8b\xda\xe27\xf4^\xca?q\xce\x92_\xefM\xd4?\xc3\x17"d\x06]\xc4?4\xb8\xb3\xb0\x84:\xd1?\xa5\xda\x15\xea\x80\x08\xc9\xbf\xa9"\xa9\xc8\x835\xd2\xbf\xa5\x9at7@K\xf3\xbf/\xb9\xe5\x89g\xa8\xd3?\xe8\x1f\xf7ov\xcc\xd3?\x0f9wf\xdd\xc7w?\x91.K\xbe\xfc\xf6\xd5\xbf\xf7c\x80A\xfd\x10\xaa?\x88\xe7\xbd\x9c\xd0F\xca\xbf^-\xd9\xcf\xbc\xd5\xed\xbf\xb9"\x7fMA\xa2\xd0?\x07l\x8dS6 \xec\xbf\x14\x86\x82j\xef\xae\x9b\xbf\x00\xa3\xba9\'\x96\xbb?@\r\xa3\xf2\xb3\xcd\xca\xbf\xacU\xa74\x9eV\xec\xbf3\xfc\xb8{\x05\x89\xc1\xbf\x7f\x93\n\xc1d\x90\xc8\xbfi\xa6\x94ro\x8d\xa0\xbfh\x9d\xcd\xff)}\xc0?d\xc6Jm)\xdf\xc1\xbf\xeb\x85\x94A\x93\xb1\xd3?\xad\x9d\xebH_\x06\xa8?\x93\x96\xd8\x92\xdc]\xb6\xbf\x9f\x8f\x81B\x02\r\xc5\xbf\x1d\xcc<\x01>J\xc7?u\xc4\x18\xb4F_\xd0?\xf7d"\x8d\xb1\xc3\xc4?^\xa1}\x1f\x9e\xf2\xb0\xbf\x8fa\x1a\xf6o\t\xce?\xeeI4\x8f\x8c\xbf\xc0\xbf1\x14\xc52\xa9;\xae\xbf?F\xb4\xea3\x9d\xa5\xbfc\xb0N<\xe5\t\xcf\xbfex\n\xdbg9\x84\xbfFQ\x89\x03\xdd\x19\xd2\xbfX\xfc6i\xd2\x13\xe0\xbf\xd3\x1d1Mg\x13\xc2\xbf/D\xc9~\xe2\x83\xd9\xbf8:\xa4O\x1f\xb0\xb2?9\x11\x9d\x1c\xb9|\xb7\xbf%\x8b\xe5*U\x17\xe2?T8SS\x87Y\xa2?\xd9tSd\xcdX\xb5?>\x19K\x93\xad\x84\xa1\xbf\xb2<+\x8eC;\xd2\xbf\x9e\x01A\xd7\xf4t\xc9\xbf\xad\xd0\xfa\x0bD\x93\xbb?H\x19%\xdf\xc2]\xcd\xbf\x87~[\xbe\x1c(\xdc?,\x0c\xf1iH\x85\xf3\xbf\x97r\xa1\x857\x03\xc1?\xa2\xd8\x81\x8c\x1fX\xa5\xbf\x95\xa0\xa3\xbcz\xa8\xab?\xc2\x17G7\xa8\x11\xba?\xd0\xbb\x91\xf7\xcc\x04\xc6?\xef\xc2Gj\x86;\xb4\xbf\x14\x1d\xed\xc8\x8b\xf7\xd5?T\x87\x9c \xaa\x82\xd4?\xbb\x91\xfcI\xee5\xb9?\xdet\x02\xca\xd2\xc0\xdb?\xc7\xc2\x9fca\x03\x88\xbfh\t\xc5Z\x11\x10\xdb\xbf\xfb\x03r(zV\x97?\xf8\x18{\x10\xa2)\xc2\xbfh\xff\x93\xb6H\xc2\xbc?/D\x89\xb1<e\xe8\xbf\x84\xbf\xc1g\x01\xe4\xaa\xbfZ\x8d\x8e\x1f\xfd\xad\xb4\xbf-r\x94*$@\xad\xbf3\xc4\xfc\xf7\xf4\xfd\xa6?\xd1\x1dN}\xd4\xa4\xcc\xbfQ\x1a\xf0\x1d5\x89\xd2\xbf\xad\xa8i\x89T\xb2\xd9\xbf\xd7<\xa5%\x1aZ\x8a\xbf\x8b\xdf\xde5Sd\xf2\xbfna-\xd7,k\xca?\xb3R#\xd5\x01;\xd6?\x1a%2X`\xa0\xc7\xbf_9\xea5j,\xf0\xbf\xe2\xc7\xbf<\xd7\x12\xcc?\x03\xb8Da]\xcb\xc4?/g\xd6My\xea\xd2\xbf\xe5\xc4)<.\x94\xd9?\xa6\xda\xa5\xea\xa0&\xbc?\x14x\xfe\x96\xcf\xcb\xe8?\x14\xc9"\xf7\xf1\x99U?\x98\x80\xc8^\xf7|\xa3?\xe1\xf0\x19\xf2\x1fd\xc7?!\x0b\xa5\x08\xd1\xd9\xa6?\x82Ajcd \xa1?\xf6b\x02\xf4\xde\xb7\x83\xbf\x84\x95\x07K\xf4y\xcc?\x8b\x91_\xd7\xc4|\xc6\xbfnuqf\xcd\x9a\xb0?\xba~\x15\xefzp\x80\xbf\xa5\x03Sj\x81\xd6\xd1\xbf\xa5\x8a3\xed-\xfe\xc4?\x95\x7f\xd7\x86i\xc8\xa5\xbf\x88\xf4\xb7o;\x84\xb5?\x16\xdbe*\xb3\x86\xe5\xbf\x9d\x80\xdd+\xc55\xc8?\x8d\xad\xe7l\t\x82\x90\xbfS\xffA\x9a\x14\xdf\xc1?\x17\x1f\x8e&\xa2t\xcb?\xfc\x87\xe8U\x0ek\xe7?\n8\xa7\x08\xb7\x91\xb4\xbf\x9c\x9f\t\xa34\x80\x83\xbfe\x7f\x95\xa5\x11D\xa3\xbf\x8d\x8dz\xfc\xff\xad\xda\xbfT\xcb$\x96+\xae\xc3?\x86\xe7\xd6\xa7\xb8\x00\xc1\xbf\x02$\xfd\x83\xb5i\xca?\x8f\xe19\\~\xc0\xe1?Sb3s\x01\x8b\xdb\xbf\x13&3V\x1a\x8c\xa7?m\x8a\xaa\x95%\xf8\xc5\xbf\xd8\x91\x04R\x198\xac?\xb6\xdc\x9dI\xaa\x19\xab\xbf\xb9Lv\xdd\x990\xa2\xbfW\x1e\xda\xc6\xb8f\xd3?Z\x1f\xdf\xbdx\xb3\xeb?Z\xc7#6|\xa7\xc1\xbfM\xda$\x99\xb6u\xc6?=C\xd3\x8f\xefP\xed?\xde>)z\x944\x9c\xbf<\xd7\x97\xbbE\xc3\xec\xbf\x85\xce\xeeH\xf0\x87|?W\xeb731\xe1\xcf?\xadX\x1d\x1fn(\xc0?\x12\xc2\xdc\xef\xb4R\xac?\xcf\xcc\nK1\xe0\x84?7\x84T\xdf\xdb\x9b\xc0\xbf\x10\xeeRx\x8b\x00\xdb?\x11{\x18=\xd1\x81\xba?+9\x0eCF\'\xcc?\xddI\x10\xf22\x84\xc7?pj\x8d\xf3\xab\xfd\xd7?y<D}\r\xce\xaf\xbf\xd8\xd5\x89$b/\xd9\xbf8j\x84]Y\x9f\xbe\xbf0\xb7\xbb\'\x08\xac\xec?\xf40\xabp y\xd8?\xcb\xb5\xd9\x1aH\x9f\xd9\xbfBs\xe9<>^\x98\xbf\xa0T\x10K\x8d;\xb2?\xfb\xa5t$\xcb7\xf0\xbf\x0c\xc4\x18h\\\x19\xd2?m\xd14n.a\xa2\xbf\xc1\xc3\x12\x94(\xc9\xe2?\xbc\xd7\xebF\xaa\x93\xb5?\x93:\xe9$\x1a\xe8\xa1\xbf\x9c\x8d|\xbe\xf0\xe4\xb1\xbfq\xadN(6|\xe5\xbf\x95N\n\xb8sn\xca?\x869\xc5\xd1\xfd\x1e\xbb?\x85G\xe4\x048\xff\x8a?\xe3\xcd\xcbG\x10\xb4\xb0\xbfy\xdf\xf1\x9e\x98\xc2\x81\xbf5f\'\xc2\x86\xca\x95\xbf\xef}>"\xa1|\xae?\x93;C\x9bB\x9dZ\xbf\x8a\x15\xe3\x0c&!Q?R@\xb9\xe7\xe4W\xb5\xbfrk\xc5,\x8d,\xdc\xbf\xbd\x9c\xe5.\xcbS\xa3\xbf50\xdc\xd7\xe1\xf1\xbc\xbfL\x0f\xd7\x91O\xae\xaa?s{\xc3\x89R\xbas\xbf\x85\xd2]\x03Ao\xbf?u-\x0e\xf7\x87\x96\xb3?-\x89\xa0$.\x8b\xd6?\xa6\x8aC\x8b\xde\x01~?.Z\xff\x8a_\x9b\xd5\xbf\xa9\x9e<\xb4\x93\xc9\xa2\xbfm8\xbe\xd8\x1d;\xae?\x83#G\x0ba\x9e\x96?\x19\xc6\x12i1Y\xb5\xbf\xcf)\x85a\x15\r\xb6?\x0bz\xd6\x001*\x9f?\xad\x82!u\xe2J\xe4\xbf\xc9|\xdeY\xd7\x8d\xb5\xbf +$\xba\xe6?\x9e?/^\xcf\x9c\xd5\xf8\xc2?^\xed\xaa\xe0\xc3\xc3\xae\xbf\x14\xb3\xbe\xffU \xe4?\xa0\x10\xdd\xbd\x86\xaf\x99\xbf\xc8\xf5\xf3\xabM\x14\xc5?\xc9\xca\xe6\x07\xb8\x81\xe3?_e\xd0\xb0\x07\xef\xa7?b\xc7\xc2P\xa9\xc1\xee\xbfhr\xc2_\x88\xe7\xc9?\xb3&b\xaa\xb3 \xb4?\xde\xcf\xe7\xe9(\xae\x94?\x1a,\xe5\xea\x82\x02\xda?.}]\xe2\x8a\xc0\x96\xbf[q\x9b\xd9\xfe\x91\x95\xbfb\xf2L\xab\xf8-\xbc?\x12\xdb\x7f\xac\xad\xd0\xa3?\xad\xe2\xb3].\xfb\xbb?\x9c\xd7\x83\xa5\xd0\xef\xb2?\x03\'\xe1\xe8\xa7m\xe2?\x05\x00\x8dD\rP\x93?\x10\x00S\x17C!\xc1?)\xefs\x8dj\xa1\xb0?\xff\xf2\xd7\xac-\x87\xe3?J%\x15\xa8\xeb\x83\xdf?'
p15
tp16
bag2
(g3
(I0
tp17
g5
tp18
Rp19
(I1
(I9
I64
tp20
g12
I00
S'\x05\x80\x14K;l\xc0?\x9d\xfdV\xfcR3\xc3?\xbaI^\nhj\xbb\xbf\xf4\x0fN\xee`V\xc5\xbf\x0f\x1a\x97{i\x95\xb2\xbf\xee\xb7\xc0\x9f\x9b@\xbe\xbf\x05\x01\x16\xd1\xcc\x08\xd4\xbf\xb7\xa4\x82\x11)i\xc0\xbf\xa7R\xf1\xf4\'\x9d\xbf?\x87\x96_\xa3\xde\xe1\xd4\xbf8u?\x91\xfa"\xce\xbf\xc6\x99\x83\xda\xcf\xff\xb9\xbf\xd3isk\xa0\xda\xe0?\xb6\x9f\xc2\xf2\x91\x0c\xda?\x00\x90\xaa\xf0vv\xa6\xbf\xdf\xa6X\x0f\x929\xc4\xbf1\x1a\xea\xbe\xbd\xeb\xc9?\x89\xfe\xab\x85q\xa2\xee\xbf\xa8\xd12 \xc9\x86\xc6\xbfv\xc2\xbb}\x0f\xdb\xe1?\x10\x16\xf5@}\xca\xec\xbf}b\xdb\xb9J;\xc8?FcE\x993\x00\xa8?\x92\x82J$\x93\x8a\xc5\xbf\xc5\x07\xafC\x15l\xae\xbf\'\xc7A:0\xc0\xc1\xbf\'\xe1\x1b\x8a\x05:\xf2\xbf\xb4\xdaP$\xd2\xa4\xaa\xbf\xa5\\x\xc1nG\xde?\x11\xbc\x83|y\x0b\xee?R\x7f\xadY\xfb\xdb\xa9\xbfvS\x1d}\xcc \xc4\xbf\xb9\xa5\xf5\xb9\x17o\xe8?\xb0\x1f22\xe6\x03\xef?\x86\xe1\x8a\xe7\xe4\xb6\xd2\xbf\x1c\xe9\x8c\x12\x84\xf0\xe4?\\1\x00Y\x9dB\xd6?\xd3\xf1\xaf\x11\xce\x06\xec\xbfTQ\xddh\x15\xdc\xc2?"\x0bC\xbe\x0c_\x92\xbf\xa1\x94\xec\xb3\x9a\xce\xe3?\x957\x95\xb2_\x1b\xdf?\r\xcb\xf1\xb7\x06\x17\xc0?9\x96\xcd?E\x90\xe6\xbf\xd3\xa8C\x0c\'\t\xe8?F\x87{\xe9o\xbe\xc1\xbfa\x8a\x94*\xe2\xeb\xc2\xbf\xe2\x86]\xe8\x18\x1d\xbf\xbfm\xf0\x19\x8a\x82\x86\xe4??B0\xe6\xcd\xa8\xc5\xbf\x86\xc7\x13\xe6\x80I\xee\xbf\xa4\xd2\xcfJ\xcfB\xbc?tI\x94\t\xab\xa5\xc2\xbf\xfdi\x18\xeb\x04\xc9\xee\xbf\x1f\x89\xf8f\xdb\xda\xc6\xbf\x10\x07\x13\xe5c/\xd5?\x16\xec\t\xea\x0f\xea\xe3\xbf]\x19\x1e\xc3\xd6\xb9\xea\xbf=\xee\x9f%\xee\x1b\xe3?&q\xfapH\\\xde\xbf\xa9]\xe3U\x88\xe5\xc4\xbfA\x99\xd6\xc4Ra\xc5\xbf\x825\xf5\x7f\xc7o\xac?a-\xe5\x93\x9a\xe1\xe4\xbf\xb7\xcd\xbd\x1d\xa3&\xd6?\xb4\xda\x96\x93O\xe9\xa7?\x87\xb6N~{\x8f\xc3?\x1d\x97HksJ\xb2?%:7\x98PF\xb0?\xee\rK\xa7+\xe3\xc2\xbf\x03\tXa\x0f/\xdb\xbfnj\x12h\xc1\x0c}?\xb8}$Y\xb1\xdb\xbd\xbfv\xc9e`\xcc\xb0\x94\xbfC(Rz\xe3\x9e\xd0?\x0eD\x8c\xab\x1c\x8c\xc1?\xa1\xed\xc02\xfdE\xe6?,\xdc\x057\xe9\xd9\xa1?\x93\xea\x95"\x08\xe3n\xbf\x0c\xc1\x1f+\xd9\xce\xaa?\x90\xad\xf6\'\xe2\xb4\xb8\xbf~\x97\xd3XX\x05\xf1\xbf\xa6\x83\x83\x91?\xea\xc8?\xdb\x0egk\xff\x90\xe0?\xe5+i\t\x0c\x9e\xe7\xbf\xfa\x973\x84\x95\x80\xe1?\x8e\x92\xd2\x99\xfd`\xbc\xbf\xcc5\x975ne\xab?d\x82\xd1j\x80\x95\x8c\xbf^\xcc\xa0\x06m\xa8\xb1?\x80\r,}gO\xed\xbf\xbdm\x00\x06\x99\xe0\x9e?\x10\xd3\x87\xaf{9\xe7?\x00=\xea9*a\xe5?f\xb7\x97\xa9\xb8j\xe4\xbf6\xc9\xa9\xa3r\x16\xb0?\x03\xa6\xab0\x1a \xd8?\xe0\x7f\xa5\x1f\x02$\xd9?;\x8b\xb4\xfd\xba!\xae?\xc0\x01A;\xc5\xb6\xe0?/\x12\x9f2\x1e\xa9\xd3\xbf\r~Ne\x84E\xdb\xbf\xcetK\xbd\x1bA\xab\xbf\xd0\xbc\xbe[\xf68\xb0?p\xdf\xafssT\xe7?yi\x84\xdb?K\xd5?\x0eaB\xfd\x0eK\xa5\xbf\x13\xf3\'_A\x0e\xd7\xbf\xb40\xd4\x96\xe6q\xea?\xe8\x07\xa34J\xf0\xb1?~\x9f\xda\xd8\xd2z\xcd?=o\xb2?\xc8t\xca?x\t\xb4\xa9A!\xd1?sg\xbea\xfd&\xb3?\xf9\x0e3\xa4\xd6\xc4\xe8\xbf\xd8~n\x91^\xab\xa4\xbf\x1a\xc4i\x0cW\x82\xd0?`\xc0\xc5g\xbe5\xd1\xbf\x05\xccG\x80\xda\xc3\xc0?b/\xc5\xdcXZ\xd4\xbfWt\xce3\x82\xa0\xe6\xbfw!\xeeC(S\xe6\xbf\x8az\xf4\n\x90\xad\xe9?`\x10\x1e=\x8e\xf3\xb1\xbf7\xad\x98u\x7f\xf2\xab?\x83I{\x85\\\x83\xc0?\x9a\x87\xeb\xca)\xc5\xe2\xbf*g\xa7Z\xc9\x9c\xd2\xbfY)\x8cB\xacJ\xd2?\xea\x96,;\xf88\xba?=\x03\xd7\x0fuo\xb4?\xbd\x98\xdf\xa4\xe3\x03\xc1?8-\x95g\xff\x11\xb7\xbf\xd1\xcagu\xf3\x8a\xe3\xbfqn\tc\x8d\xfa\xe5\xbf\x9aCZ\xaen\xad\xbb?\xc8}\x0b\xbd#\t\xc5\xbf4\xd6;\xcclm\xb5?`\x850\xedH;\xda?nc9\x97\xfd)\x91\xbf\x85>kq\xd8\x9b\xda?\xda"v\xc4\x9e\x92\xe6\xbf\x13\x07}\xe2\x07\xcd\x96?c2Hlz\xd7\xc0?-\xf1\x19\xa4\xd4/\xc3\xbf\x06\x9e\xa9+\nX\xe0\xbf\x04Ym\xf0|\xa6\xae\xbf\xb6fFM\xe3\x89\x7f?\xfd;z\xa9\x86\xd6\xd4\xbfV %\xf8\xda\x0c\xe3?\xee\x0fc\x0f\xc6\xd9\xc6\xbf\xef|\xa3\xb7\x01\xc5l\xbfZ\xdd\x1f\xcfX\xc3\xba?g\xcbn\x0et\x99\xb8\xbf)\x8f\xd7g\xfa9\xdb\xbf\x0e0\x87]\x95\xd4\x8f?\x05\xb4h\xe1\xc3\xad\xd7?\x7f\x05ek%\xe6\xaa?\xca\xc0\xc5\xc9\x92\x03\xed\xbf\xdb\xfa\x00\x16O\xc2\x9a\xbf\x10\xa4\xd8~\xcf"\xd6\xbfC\xbd[\xd7\xd3\xb1\xd9\xbf\xe6+\x08\xa7\\t\xa0\xbf\xdc4\xc0 \x95\xd7\xa4?\x13\xddB$\xd3&\xec\xbf$,\x84\x95\x11\xe0\x9c\xbf\x87\xf5\xba\x9f\xaa\xd9\xa3?J\x81\xca-h\x9b\x8d\xbf\xc9}2\xb4\x1bQ\xdd?|(3\x00\x92*\xc9\xbf\x90R\x08\xce\x02\xef\x99?\xaa\x95C\xda\x1cw\xcd\xbfK\xef@y\xc5\x1c\xd8?\xca\t\xf9i\x9a\x90h?<\xed\x0b\x9c\x08\x8a\xb6?~\x85\xad\x0f/\xd0\xb9?\xfc\x15\xd7l\x11@\xd7\xbf+}\x8eM\xd9M\xb4?s\xf1\xfc\xda\x8c\xd7\xdf\xbf{h\xcf)]5\xa2?+J]M\xc4\x81\xa4\xbf\xfc\xcb\x87\x8e\x9e\t\xc0?\xc7\xbc\x1f\xa6\xc3\x97\xa8?\x82&K\x9f\xcf\x83\xf0\xbf3\xad\xafXY\xe5\xd3\xbf)!\xcb\x97\xc5\xe2\xe1\xbf\xc4\x92\xb9\xcd"\x16\xe0?_\x8a\xda\x83\x88\x81\xb1\xbf\xbe\xf7U\r\xb2\xcb\xc0?~\x05\x0f\x19\x0e\xd9\x98\xbf\x0b\xab\xd9m\x1a\xa0\xef\xbf\xb0\x18H*\x97\xda\xb1?LP\x87\xbe\xf7E\xe5?\x14v=Q4n\xc4\xbf\x9f\xfdn\xe5Y\x06\xae?B\xd2 a\xac\x04\xc4\xbf\xe6pb\x0cG\xfd\xb9?\x1f?+\x17n,\xd6\xbf\x06\xf6\x85\xd5\\\x11\xe4\xbf\x83\xe4\xc7\xd9\x12\x11\xc1\xbfQ/y\xa5W~\x9c\xbf>\xfa\xdc+\xb1}\xd0?8\x7fa\xab\x08\xd1\xeb?\xb6\x80I\xd8\x7f\x08\xb4?\x8d\xbf]=VK\xba?[\x9f\x03]\xbb\xa5\xec\xbf\xc9\xb7\x04\xb3?\xeb\xa4\xbf\x92r\x9e[\xff\x16\xca\xbf\xfb\xd4Er\xd8\xe2\xb1\xbfW-\xf2\x851\xa6\xd4?\xff@A_"{\xc8?\xe3\xb8"\x8c"\xe6\xb1\xbf\xab\x97$N|l\xe1?\xea\xdc\x84s\xe0t\xe0?O\xc5\xf4\xd1\xc1W\xbe\xbf\xbf\xd1\x10\xc2#\x19\x9f?\x8ci\x0e\xad\x00N\xce\xbf\tp\x92\xd1\xc2\x8e\xcb?-\xd8\x12\xf0[\xb5\xd9?\xbd\x977\xce\x9e\xe6\xad\xbf\xe5\xecr\x19\xaf\xbc\xa8?\xf6\xf0X\x89\xe3\xdd\xcc\xbf\xd4a\x9b\xaa\x18\x15\xe9\xbf\xde\xa3\xacMc\xfe\xbb?;\xdfv\xb5\x11\x98\xeb\xbf\xaf%!\xfa7a\xf2\xbf#\xb2\xb0`@\x0e\xdf?\xca\x87\x8d\x95\xd8M\xb6\xbf\x9e\x1b\x1b\xf2\xe72\xec\xbf\xf5\xe0\xa7w\xd9Y\xe9?YJ\x07\xea@7\xca\xbf\xb9\xca\x16\xc8\xf7h\xb2\xbf\x19\xf1(\x9a#)\xde?\x93C\xc2\xb4>\xc8\xc5\xbf\x0c\xb8s\x80a0\xcd\xbf\xc7\xa7\xd6V\xcc\xf9\xd2?\x0b\xc9s7\xfa\xd7\xb0??\x01T\xef\xc4\xa9\xb1?\x8f!W\xbd`J\xe2?\xb4\x914\xa9\xe8\x8b\xde?\x07\xea\xf8\xd6_\xa2\xde\xbf\xafi<\xde^_w\xbf\x10\xcd\x83\x8b\xe9\xc9\xd2?\xf3\x01ZKA\xab\xcc\xbf\x1d0\x11\x9a\x92f\xc4?\x0c\x82\x14j\xf0,\xec?\xfe\x8a\xf2\x0b%\xcc\x92\xbf4R\x92\xfa^\x1e\xf0\xbf!\xf6\x7f6\xaa\xdb\xba?\xbc\xbf\xd9\xc3\xfc\x98\xcd?\xbd\x15609l\xd9?\xaa\x11T\xa8S\xf1\xd3?t\x98\xb0d\xd9\xbd\xb8\xbf^\xa6W|\x9f\xeb\xc1?{\x16(\x9a\x15`\xea\xbf:\x1f\x92\xf0M\x1e\xe9?WY\xb7g*\xd0\xc9?\x82\x12\xdeTk\xd7\xb9?4\xcbu\xcd\x8d\xb2\xa3?)7]\x15\xf8\xf7\xa1?\x1bH\xe4\x95\x00\xc2\xc2?s\xefW~\x90\x04\xd6\xbf|\xe1\x03B,0\x9c?pgm\xe4\xe9\x9d\xc7?\xf4\xcd\x14W\xef\x94\xd5?\xb1|\x07<1x\xdc?\r#\xa2\xa6\x95\x82\xdf?\xad\xd1\xc9\x946\x14\xd4\xbf\xbd\xe0\xa7y\xdal\xdd\xbf\x91end~0\xe9\xbf\x8a\xe4\x86\xce#\'\xc6\xbf\xc4\x12<\xb2}\xfc\xa7?3\x1ak3\xa9?\xd1?\x18O\x02\xdf\'\x8b\xe9?<\x1d9\xadS\x8a\xd5\xbfd\xf8\xc3\xb7\x84Z\xde\xbf\xa9\x96(\x80\xb2\xbc\xf1?\xe0Z2e)\xd2\xd2?\x9b\xf3\xfe\xca\xfb\xe6\xd9?<\xdaV=%?\xcd\xbf\xa5L\x03\x01@\xbd\xcb?\x9cR;\xf5\xec,\xc4\xbf\x02\x06qM@\x0b\xeb?+\xbd\xee\xb8\x1c\xd4\xca?~z\x8b\x15EH\xe2\xbf{Pj\xf8\x0b\xbc\xe6\xbfL\xa1 KbI\xcd\xbf1\xec\xe3\xa4]\x81\xcd\xbfG\x97\x9fG\x02\x1d\xf3\xbf\x85\x0e@\xbe\xe7\x1f\xf4\xbf?\xb4\rm\xfe\x15\xc8?\x1c]t\x9d\\\xd5\xdc\xbf_\x9c)P-\x89\xd4\xbf\xe6v\x9f\x9fI\x1f\xeb?\xf0\x17\xde\x8f\x81\x00\x91?2S\xbb\xfb\xae@\xd0\xbfm\x07c\x17\xc6Y\xc7\xbfLH\xb0\xa6,9\xe3\xbf?\xa1\xd6c\xd4[\xb7?\x81\xd5\xbf\x9e\xd1k\xd9?\x88hu@\x81\xc3\xe7\xbf\xb5\x91#\x98\xc7\xfc\xcf\xbf\xecs//[\n\xcb?\x99\xecyWk4\xc9?J-y\xc3p\xff\xe1\xbf\x88$\xca\x96\x0b\x0c\xca\xbf5b\xf4\x81\xee\x05\xed?\x7f\xe5\x0b\x82\x92e\x82\xbf\x1esIc\xb9h\xbc\xbf+*\xb9\xce\xbe\xfc\xee?\xfc\\D\xcf0\xc1\xd1\xbfK!\xd5n\x81\x9b\xd4\xbf8\x8a\x83\x817\xb5\xe7?\xf4W\xe0|\xd1=\xeb?\xd5,@g\xacX\xd6\xbfV:H\xff\x94R\xcd?\xb6\xc4q6\xf2\xf9\xba\xbf0\xe1$2D\xe2\xd1\xbf\xea\x83\xe3\x03\x93\xcd\xcf\xbf"\x97W\x95\xf5T\xef?\x8fM\x156\xc2\xa4\xd5\xbf\xd1\t\x1f:\xc5\x18\xc1\xbf6\x1c\xf27\xdd\xac\xc3\xbf\xfa\x03L*7\x87\xc1\xbfL(4t\x94:\xcb\xbfq\xb1}\x9f\xc0\xf5\xd8?\x81\x0eQ\x88\xf1v\xde?d\xa1\x07/\xd0\x9c\xd0\xbf@_\xeb\xa6\xd7-\x90\xbfg$W\xa9\xf6\x83\xbb?\xb3\xc0\xa2\xb0\xea\x83\xc1\xbfw\xe3\xde*\xe2\xa8\xd2?\x02\xee9)\xb3`\xe2\xbf\x1dP\x97\xf5\xa0!\x8f\xbf\x80\xc7\xc0*o\x0c\xd5?\n\xb5\xa0\xfa\xba\xbc\xc1\xbfm1\xf6S\xcds\xa0\xbf\xe1H\xb8Jw5\xe9?|.4\xb2\xb7@\xd1?\xc6\xd4\x15\xef\x0f\xfb\xe7\xbf\x123\xeb3\x93\xc7\xe8?a\xca%\x82\xbbI\xc8\xbf\x18\xa9\x91muX\xc0\xbf\x8e\x96p\xab\xef\x13\xd6?\x9b\xffn\x97\xc5\xb6\xd0\xbf3\xee\xc8\xe5\xfc\x88\xc6?V6\x14\x9e\xc3>\xea?x:\x83p<H\xd0\xbf\x873\xef\xc0\x1f=\xe4\xbf~\xebN9\x90\xfc\xec\xbf\xa8\x8a\xd5\xef\xcc\xe2\xc9?8\xb1\x7f\x01\x07\xe6\xd3?\x92\xa0\x96E\xec\xe8\xdc\xbf\xc1\x86\xb1p\nw\xe0\xbf\xd3\xe9g\xf9\xa2\x0e\xca?\xb0\x04\xce\xbb="\xe9\xbf\xfc\xaf=\x02\xbdy\x9f\xbf\x9dC\xf7\xcc11\xe4?\x01\x8dN\x08;\xc9\x9c\xbf\x04\x13\xe9\xf1\xf1\x8e\xd2?\xcf\x17\xf1C$\xad\xea\xbf\xa3[\xa5E\x17U\xdd\xbf\x0c4\xda\xd5L\xdc\xbc\xbf\x90vZ]\x17#\xe4?\xf2\xd3\xeb\xc1\x19\x02\xf1\xbf\x82\xfdE\x0f`\xc0\xd4?\xf7Gs\xd5w\x05\x99?E\xe5\x90\xbf\x1e\xab\xc3\xbf[\x0e\xbb!2N\xe3\xbf\xd3\xe3_\xa9V{\xcd?S\x0b$\x16\\\xf3\xe8?\xfc\x14B\xc6n\x8e\x93\xbf\x17\xb10\xf5b/w\xbf\xb2m \xa4\xfb\xdb\xe3?\x1e\xe8\x0b\xa1a6\xd3?\x921J\xcbf\xc7\xbf?\xd5\x14\xc1km\xf3\xe1?\xd6h,ex\xa8\xe4?;\xdd$\xbb\xf8s\xf0\xbff<\xf6\x83\x9a\xca\xcc?\xbc\xa5.]\x93\xcf\xab?\xdas\xe8\xe2\xa5`\xd3?\x14k\x9a\xcbV\xa0\xc7?\xba\xcf\xbf\xf6"\x83\xd9?Z\xabd+q\xe0\xe4\xbfHT\xa3("\xcd\x93?J\x1d\x11W\xcc\xea\xc6\xbf\x7f\x87\x11\x0fm\'\xc1?&%\x90\xc8\x87 \xc5\xbf\x96w\x99\x1a\xb1&\xc6?w/\x0c\x13\xfa\xa4\xe0?\xc1\xfaY\x1a\x87\xe2\xb9?\xf2\x12\xd8V~\xd1\xcd\xbf\xd6AkA\xbd\x0f\x90\xbfp \xab2=\xa7\xe3\xbfx\xe1\x16\xd3Q\x08\xaa\xbf\xdc\xce\xc4fV\xc7\xe3\xbf\x8a\xea\x8e\x15\\\xae\xc9?tC\xff\xa3\xb4\xb0\xb1?\x19t\xd8m\xa3\x0e\xc5?%B\x8e\xaa\x8c\xbf\xd0\xbf\x19\x0c1\xe3\xb0\xbf\xdc?e:\x02\xb8\xb1\xae\xb3\xbfD\xf4yMR\xdc\xdc\xbfB\xae+\xe7\xdd\x16\xcb?\xb0 \x83H\xf4\xec\xe0\xbf\x11\x83`d\xb5\xaf\xc5\xbf\x88\xab`\xe2?G\'\xbf\xa1\x90\nG\n\x06\xba?r\xabc\x03\xa3g\xc1\xbfS\xd3\x14\xda\xe5d\xdd?Zu\xf1&\\#\xb5\xbfA\xf0\x13\xaa\xd7\xdd\xe4\xbf\x7f\xa1\xe3\x8b\x9e\xdd\xe2\xbfSu>\xd3Y\'\xe4?\x124\xbb\xea\xac+\xa7\xbf\xdc}\xd3"SE\xaa?\xd4?\xf7\x89\x04\xb9\xc4?\xa24(x\x08\xfb\xd3\xbfx\xae\xff\xf6\x07\xb7\xe2\xbfl\x16\x8d\x19\xe4*\xd7?\xd8\x1fq_\xf4\xa5\x8d\xbf\x91\x1f\xb4p\xef\xca\xc3?a\x89\x18\xcc\x91\xb1\xb2?=i[-Ba\xf0\xbfl@\xdf\xfd"\x83\xd2\xbf\x95Q\xa3\x02\x84\xb4\xbc?\xf4X\xa7"\xe8B\xba?\xf5,\xdf+\xa7\xfa\xe7\xbfV.gY\x11\xaa\x95\xbf\xdf(\x18+\xb4\xbf\xdc\xbf1h\x0fA!\xc5\xdb\xbf$\xb5\rf\xfbu\xd0\xbf\xf5#\xa7Lm~\x95?\xc3\x10Dr8\xd2\xd9?\xd0Z[\x10\x808\xc4?\x07\xd2\x1c\x9e\xe5O\xd0\xbf\xd9\x1e\xbd}\xb1\xb7\x9f\xbf\xb3$\xec\xe9\x8e\xe7i\xbf\xd0\x86\xc4\x1c\x17\xa8\xdd?\'h[~\xe41\xde?*{\x85\xff\x0ek\xdb?n\x97\xd4\x9f\xef\x16\xee\xbf.\xf9\x91\xa0RQ\xc0\xbf\x80M(\xeao\xd4\xbf?\xd6GJ\x17\xedn\xb0\xbf\n\x91\x06\xe9Y\xe6\xe2?=\xcf\xb0\xb9\x9f\xa1\xca\xbf\xd7\xeb\xe2\xeb\xfc\xa3\xd7\xbf\x96\x00\xe1^\xaa\x97\xc1\xbf\xf8\x9b\xff\xf4 5\xc5?\na\xe0\xca\xa2\x15\x98\xbf\xfc\xa2\xd1Z\x89\xdd\xce?j7\xbf\x04\xe4\\\xe3?\xd6"8\xfe\xd7\'\xe4?q\xfd]IJ\x13\xb9?^\xdb\x1d\x94b:\x83?\x05E\xccb\x87\xb6\xc3\xbf\x07G\xa84\xad\xf3\xe0\xbf\xb4L^\xa84\x01\xa5\xbfH\xa8\xbf\xa7\x16E\xd6\xbf\x1fkV\xfe\xc2u\xee?*\x10\xf7^Y\xf6\xc3\xbf\xb5\xdew$\x04*\x91\xbf\xa9sR\x19\xa5\xdaq?\x9eEI\xcd\xfc\xce\xdd?\x94z\xde}\xfbt\x83?t\xd5HR\xf7\xfc\xc9?\x17\xf1A$\xb5v_\xbf\x94\x85\xad\xa6\xfb)\xf1\xbfq1\'\n|\xb9\xc1?\xc3\xd5C\x93\x05E\xa1\xbf\xdc\n\x1f?u\x99\xb9?c\xaf\x9cA\xe7\xaa\xb1?\x12\x00gE*e\xd6?\xd8k\xd82\xb4\xa0\xc7?\xe6\xcd,\xaa\xfe\xb5\xbf\xbf\xa8^\x99\x1eHQ\xc2?\x02\x03\xc8l\xba\x0e\xf3?\x8c&=@\xa7>\x91\xbf&\xca\xa0\x99PO\xea?9\xfe\x17\xa0=\xa7\xea?;\xc4\x18$\x9c\xac\xa8\xbfB6\xf3\xd1+\x96\xc6?K\x81\xc2@I\xc0\xee?\x98sA\t\xc7\x1f\xc5\xbf\xdd\xe7\xad<ku\xbd\xbf\x99\x1f\x18\xd6zU\xba\xbf\x80\xf6\xdc\xb6=\xf5\xd5\xbf\xe3\xf3\x9cv\x01l\xdb?F\xacs\xaf\xe8\xd2\x91\xbf\x02I\xa0\xe7\xc7b\xc3?\\Og\x0c\xbdp\xa4?Z\xf2\xf1\x15\xd6\xca\xa6\xbfg\x10\xd4\xb5cE\xd2\xbf\xba\xd3\x97]\xb1k\xb2\xbf9\xbe\x10\xa7\xc7\x84\xe3?\x19\x81w\xbb!\x86\xb1\xbfc\xcd\x0ec\xa0W\xd2?\xd6\x19vA\xfe\xb2\xb1\xbf@\x99I\xc1v\xd9\xc7?}_\xbb\x15\xd6\x18\xd9\xbf\xdcZd\xde\xd3-\xa4\xbf`m*\xbe\x17\x9b\xf0?Q\xe9\x19\xe1t{\xb1?\xf9\xb9\xc9\xd6\xd4\xe3\xd3?U\xa9q\xf0\x0c\xad\xcc\xbf\xcf\xd5Q}\x14\xa3\xc2?y\x83M\x9bG-\xb9\xbf\x98\x0b\xb4\x17N\xcd\x8d\xbf\x18\x963\xb4<4\xf2?d\xd1Od\x95\xb5\xd8\xbfV\xf4\xfc=\xd0\x11\xd1\xbf[\xd8p\xbeo\xf2\x86?\xa0\x9f\x02O\xcdv\xac\xbfDqT\xc8\xe0,\xbc?\x96\xfb\x84JQ(\x89\xbf\x07\x9d\x9f\x05\xc1\x85\xd9?e\xe2\x924\x18|\xd9?\x05\x9a\x15\x85b\xdf\x96?\xb1|<\xb0\xcfc\xb6?\xeakfV\x10)\xd8\xbf\xc6\xf2\xa7\xfa\xc5z\xe0\xbf\x15\xe9X\xd9\xabn\x91?5\xa59\x04\x1b\x92\xd0?\xa7\xb12y\x1d\xe0\xe9?\xf9\xf8,7\xabXf\xbf4]^\xb123\xbf?\xdc`\xc7L\xd9\x1d\xc1?\xd3\x17\xe8\xc3\xc4\xab\xd2\xbf)ML\xd2\xc3\r\x90\xbf\xbc\x1d\xd3}\xbeQ\xdd?\xd4b~\x02\xa4\x8f\xe5\xbfs\xf9\x0b\xb5\xbbM\xd6\xbf\xcf\xed\x84!\xa0m\xbd?dw\x0c\x18\x08\xf0u?\xe3\xe7t\x1f\xf4\xc4\xa8?\x94 \xf1a\xa1\xefO\xbff\xf5\xf9[\x94R\xd9\xbf\xa2R4\xd8\xb9\xda~?"[\x89\xc684\xd7?\xa3x(\x8b[\x1e\xe4?R\xfc\x97}\xfa\xb5\xe2?\x0e\xfeX\x86\x9a(}\xbf]5\xd4\x88)\xe5\xea?2 \x87\xc8\xcd\xe6\xee?\xa4\xde\x8a\xfa\xbb\x0e\xd0\xbf\xe5\xd6\xe2\x7fas\xe0?d\x18\xcb\xc5\xa4\xf7\xe7?\xb2\'m\x7f:[\xe8\xbf2\xee\xfb\x94\x94w\xa6?Hm\xd5\xa5\x1d\xcc\xa1?\xbd\xdf\'\x89Y\x04\xbb?\xb7M\xa9\xe6Z\xf1\xdd?hE\xc0\xeeU:\xa7?\xa9z\xe0`\x90\x03\xd2\xbf\xfd\xfb}\xf1\xc0\xad\xdf?]\x88n~\xae\xcd\x88\xbfB\xfc\xadYR\x1e\xcf\xbf\xfe\xde\xc1\x0cV\xaf\xc9\xbf\xe5b\x1e4\xee\xdd\xe7?=?3\x9cV5\xa5?\xd4\xe7|\xa1\x1b\xf2\xdc\xbf\xc8D\x8aD\x00\x82\xad?\xc7H\xebF\xe1\xc3\xa7\xbf\x02*\xc9\xca\x05\x1a\xee\xbfeAc\xb9\x18M\xa3?\xd61\xde\x82p$\xe7?\xf3\xafj\x8ax\x9e\xd3\xbfr\xde\xa6\xbel\x08\xd8\xbf\x001\xc7\xbd\xf3\x02\xcf?@G5n|\xde\xc5\xbf+\xb5\xfesFc\xb9?,\xb6\tr\xfb\xd7\x96\xbf\xbb~\x92\x17\xd9\xba\xe5?\xd0\xa3\xc5\x04\xf6<\xe6\xbf'
p21
tp22
bag2
(g3
(I0
tp23
g5
tp24
Rp25
(I1
(I9
I128
tp26
g12
I00
S'dfa\xd4g\xe7\xbf?\x8cN\x13\x9d\xa9\xd8\xe6\xbf\xe5:\x13\x87\xfbg\xd7?\xae\xb4\xafc\xfba\xdb\xbf\xa2\xf2\x96h\xf7\xfb\xed\xbf\xa7K\x93\xd0m3\xdb?\x80\x86\xb52q\x84\xee\xbf\xe9\xd7\x07\xf6\xf8J\xcf?\xbeQr\xc1\x1e\x0b\xae\xbf\x98~DY[\xcd\xd0\xbf\x86\xa5\xee\x1fi^\xda?\xfb$\xe1P\xd7\xc6\xdb\xbf\xdc^\xe1\x94}\x8c\xd7\xbf\xcb\xdf\xf1\\\xd4\x93\xc5?\x92\x84\xbb\x8b\xb7\xa4\xbc?i\xef\xa2(\xf0\x96\xc9\xbf\xf7\t\x88b\xf3\'\xe5\xbf8/\xe52\xdc\xe8\xe4\xbfW\xc5\x98\x96\x92\xb0\xda\xbf<\xcb\xe6\x931\xaa\xb2\xbfJp?kd\xd1\xdd\xbfk\x01\xe9\x0bfV\xbe?\xae\x9c\x07lU\xab\xeb?\xfcn\n\x8f\xe4;\xdb\xbf#\xf7\x92U\x9d&\xe1?\x83\xdaS\x91)\xf3\xe4\xbf\xf5\x99\x17\xe2\xd7\xd5\x88\xbf\x94\xb0\xf8|\x9e\x1c\xb4\xbf?\xfe\xb3y\xdfb\xe2\xbf>\xbe}\x95\xe8S\xc3\xbf\xc0\x9d\xa0\xe7f<\xe5\xbf\x92\xec\x05\xa4\xf9\x1f\xc3?c\x94k\x90\xdb\xe6\xb7?D\x01\x96\xf3\x8c\x8b\xe5\xbf`2\xf5\x87\xb4\xe7\xf1?\xef\xd1(h6\xa4\x83\xbfP\xafn\x8b\xb3\x1b\xeb\xbf\x9a\xdd\xce]=\xae\xd8?z)\xc4al\r\xaa?\xf3\x0fv\xbec\x85\xbe\xbf9\x8f\xd0\xe0\x19\xa1\xd0\xbf\xcbn\xac\xdb>1\xda?\x10x?\x1b\x96P\xf0\xbfE\xd8\x86&\xf5\xe4\xbe?\xbd\xeb"\x010\xc4\xe3?\xf8\xca\xe5HrF\xe7\xbf\xed\xce\x94\xa6\'\xaa\xe3?\x1d\x9c\xed\xad\x8e6\xd3\xbf8utU\x8d\xa1\xe0?\x91\x95\x07\x01X9\xb8\xbf\xf2\xce\x86;I\x19\x93?\xdc\xaeAT}\x8b\xc9\xbfS&_s\xa8\xda\xdc\xbfs\xcb\xf4\x82\x14\xbd\x8e\xbf\xa3\x03WG\x9d\x1c\xd6\xbf\x81jX9\x07\xfb\xbd?\x03\xa5\x05\x0c\x06\x90\xce\xbf\xc5\xd5\xac\x014\xfb\xcf?\x0cf-0m\x83\xcf\xbf\xa2\xed\xae\xee]\xb4\xf0\xbfq\xc3\xa5\xa6T\xf7\xbf?\n\xa3\xb0\xa7\xed\x94\xc9\xbf\xac\xde\x11J\x9b\xaf\xe0\xbf3\xe5_d\x95\xbe\xe5\xbf\xbd2\xb7[{/\xd4\xbfa\xd4h\xa2/i\xc6\xbfq\xae\xb9af\xe1\xed\xbf\xe6|\xbbH\x146\xef?\x9c\xa3M}\xc8\x8b\xb5?\xfe\x13@_\'-\xce\xbf\xaa\x92\xaf\x9b\xf4w\xc9\xbf\x0f\xbf\x0c\xbc\x1b\\\xdb\xbf+\xbcQ<\xce\xc3\xda?v\x94\xc0\xbdbH\xd6\xbf\xafX\x9c\x95\xdb\xc9\xcd?\xbb\x16\x9f\x8d(\x19\xe4\xbf\x8dY<w\x82\xab\xf0\xbf\x81j(}Q\x1f\xde?\xeb\x1d\xafd\x87:\xee?\xa7\xa0\x9c\xbc\x87f\xf0?Y\x16N\xc85&\xa1?\x14\xdeK\x8c\xa8\xc6\xda\xbf\xa6o\xadp\xde{\xe4? \x9a\xc0\x0e\xea\xa2\xc9?L\xf1\xa4\xcc\x17=\xe4\xbfug\x19\x11|m\x9e\xbf\xf9jbn4}\xc2\xbf"\x87Z\x18\xc0\x19\xd4\xbf\xa6\x9d\xdf\x98_\xfb\xeb\xbfrm\xca<\xa5\xe8\xb0\xbf7p\x14\xacN \xc7?!\xd6\xda\xb2}\xf2\xca\xbf\x80\xbb\xad9\xd2\xa3\xba\xbf\x19\xc1,\x8d\xdb\xb8\xce\xbf&\x99|\\\xf5Y\xa8\xbf\x83\x04\x17\x1e\xdcd\xd7?\x04\x8f\xf5^\x9f,\xb7\xbf\xce\x13\x92\xcdT\xcf\xb1?{\xe6zy\xb9\xee\xc7?\xae\x9cr\xd8\x9a#\xbc?\x08\x9dJP[J\xe3?%n\x98\xd4\xe6\xfa\xc0?y\x9b\xd3\x97\'^\xd9\xbf\x83\xf3\x1d\xda\x19.\xe5\xbf\xae\xa4\xa8>\x94\xa8\xcc\xbf\x82*\x16\xfd\x04w\xa4\xbfo\xcc\x85&Pc\xc2?\xf0>\x93S?q\xbb?h}\x90F\xc5\xd8\xc4?P\xe5\x8akk\x9a\xaa\xbf\xe8\xeb\xa7\xae\x96\xa1\xe1? sq\x90\x0cx\xed\xbf\xba\xac\xae\xebt\x17\x92\xbf\r\xb5n\xf1\\\xa7\xba\xbf\x01\x83P\xe1]g\xb0\xbf\x1e\xfb\xf0\x9eZ\x83:\xbf\x1b\xd9\n\x1a\xf5\xaf\xe4\xbf\xa5\x86$\x1e\xc9\xbf\xd7\xbfH7\x9c\xc7wP\xd1?^x\xa9-9\x19\x88\xbf\xbd\xd2\x07\x01\xcb\x13\xbf\xbfr\x16\x80e\x06\x98\xe3\xbf\xe4g3\xdd#\x88\xd4?\xb2\x8d\x84m\x10\x81\xb9\xbf\xe8\xc1\xa7\x1e\xf4\x04\xc3?9\x1b4\xe60V\x95\xbf\x9b8\x95(\xc8\x1c\xdd\xbfj\x12\xdb\x85\x10\xe5\xdd?\xcf`\xe3q\r\xc0\xb4\xbf\xf3\xb1\x9f\x0ec+\xda\xbf\x8c\xf2\xb8q\xa8\xf3\xc0?\xadC\x7f\x994\x82\xb6?\xfe\xffn\xc4v\xbe\xe6\xbf\x18\xc2\xdb\xbc\xa9J\xca?0Q\x08\xab\xb3\xab\xe4\xbf\xbat\xde0a\xa0\xd6?.dc\xab[\x03\xbc\xbf\n2\x11h\xa9\x17\xe2?N9A\x90\xbc\xea\xec?\x90\xabl\xa2${\xc0\xbfb\xc5G\x90K\x82\xc4?\x93\xa8}\xcc8\xb0\x9d\xbfH\xa7\x98\x1dT\xb6\xea?\x86Cu\x19s\xd8\xd4?\x8b9\xfby\'\x07\xdb?\x862\x806G \x91?\xb3\x1c\xc8\xcaw&\xe5?\x8c\xc0y\xe2v%\xce?\xcfD,\xebw\xbfo\xbf\xca\xd4g\xf0\xd3\x0c\xe9?\x90W\x80\xb3N\x94\xe8?\t\\#Hf\xfa\xb6\xbf\xd7t\xa6~\x94\xdf\xee? ]\xf6\x05ds\xd3?\xf8\x9e\xd5O\xa5)\xd8?\xb5~\xbe!v=\xd3?D\xe6\x9f\xb7\x05\x1b\xdf\xbf&^\x82\x08\x0e\xc1h\xbf\x95\xb8\xbfp|\xe8\xd1\xbfZ]k\xc45p\x94?\xa5\x9d\xe1\xa1\xfbS\xdd?\xf7\x957\xed\x05A\xc8\xbfw\xbdJ\xcc\xd4\xae\xe4?sMG\x9d\xc8.\xaf\xbf1[\x0f\xc0\xbd\xe4\xd4\xbf]\x16\xb9\xabP \xd0?\xdcA\x1f\xf4m\x13\xc6?w\x10\xee\xe5\x16A\xc0\xbf(\xf3\xa9\xe2 &\xb2\xbf\x16\x11\xd3:{\xc1\xe6?\xcc\xb1\\\x9b\xae\xaa\xe4\xbf\tF&p\xe4oc\xbf\xe3\xe7D\x0e\x1f#\xdf?3n\xce\x19\xc3\xf6\xd2?5\xdbZ\x029$\xdf?6\xadv\x0e4\xf1\xc9?A\xcd\x185U\xa9\xe6?^\xde&`\xee\xad\xaa?\xb7*a\x9bJe\xc9\xbf8\xd4\x90`\x9a\xb5\xb0?\xee4J\xaa.<\xd4\xbf;\x02+\xd2\x9a\x13\x96\xbf\xf7e\x17I&\xe9\xa5\xbf\x84a\x90\xa9X3\xf5?P\xc9F\xd9\xcb\x98\xd7?\x9e\xa4\xc1\'t\xd0\xae\xbf\x8b\xcf\x12\xddET\xd1?\x8a\x13%&\xa3d\xeb\xbf\x08_\x8ag\x04\x99\xad\xbf\'\x9b\xe6\xca\xd8F\xe1\xbf\xc4\xb0\xf4n\xa0\x17\xa2?!\xe8-\xfd(\x03\xf3\xbf\x8b\x89?\x1a\x1cL\xeb\xbfA#\xf5Lq\xc4\xd3\xbf\xabs>]eT\xd1\xbf\xcd\xaa5\x9fZ\x7f\xda?0\x01d0\x95\xe4\xb6?\xf1g\xe2\x8d\x0f\x1e\xd8?\xfb\xa8\x15)\xfe\xdb\xd7?vb\xf8\xec^n\xcc\xbf8\xac7\x1f\xd9u\xe0?c\xf3\x05e"-\xb4?1\xe9weI\xd2\xc1?\x83%\x11\xaf\xdd?\xdf\xbf\xa3z6\x0f\x8c\xff\xec\xbfD\x1c\xcf\x9c|.\x8c\xbf\xe9\x17\xf86\xaf\x8c\xec?\xb5$2\xd3r#\xef?\xf4\xefD\xf87D\xd2?9\xa4\xef\x03\x01\x88\xab?\x19\x9b,H\xe3\xb5\xdf?\xe79\xf8\xb5\xbc\xaa\x9d?D\\A\x17\x9b\xa4\xe8\xbf\xb9K&\xd8\xef_\xd1\xbf@\x0bZ\x0f\x90\xf1d?:/]i\xe0\x06\xd6\xbf\xd9\x87a=\x05\xc0\xd5\xbf\xa9Z\x84~\x82\x06\x90?\xf4fb\xcfAL\xc2\xbf\xe6\xd3%\x010\xc1\xd0\xbff\x95\x0e\x88\xef9\xa3\xbf\xcd;\xea\r\xfcu\x8a\xbf!\xca\x98\x10\xd7\x89\xd0\xbf/\x16L_k\xc4\x9f\xbf\xd2\x86\xce\x02\x0c\xa5\xd1?\xd3K\x99\xb5\x08\xe9\xc3\xbfkZ\xb3\x97{\xfe\xea?\xa6\xaf\xda\xff\x84\xc8\xe6?\x15gW?Y\xe8\xd4?\xb8&\t\xee}\x1d\xe3?KnFn\x08c\xd6\xbf\xbd\xd95e\xad0\xd7\xbf\x82S\x1a\x85\xe0\x19\xc3\xbf.\x1cqG\xe3Y\x9c?\xa3\t^A\x10q\xce?\xc3\x19w\xadH\xf9\xd5?\xee\x83\xe4\xcb\x15~\xcf\xbf\xce\xa5V\x03a\x11\xd0\xbfR\x9dG}G\xa0\xec?\x01dN\x18Qp\xe1\xbfzhI0\xd7\x16\xb4?\xe1c\x02\xc0th\xce?\xb0\xe9\x02o\x12f\xbd?!t\xca\x8b\x0e\xb7\xa6?gF\x88\x83\x8c\x9e\xd5\xbf>\x15\xab8\x97P\xc6?9\xb7\\\xff\x15\x07\xd1?\xb4\xc4\xc7M\xc6;\xaa\xbf\xcc\xc3\xa1?\xe2$\xd0?\xc0\x97X\xddo\xd9\xdf\xbf\xd0\x812\xa7j\x9d\xf2?m\x96\x83\x1c\x10\xfc\x99\xbf\xb2\xaaB\x04\xf7e\xd1\xbfb\xf3\xf5\xc9\xe8\xe0\xd7?d\xefg\x98gN\xc6?\x1f!\x1b\x84\xbd\xe3\xe2?\n\xb8.\x87\x00\x02\x82?\xfd\xa7\xe8\xee\x91\x82\xb1?\x9d4\xa8\x97\x8bv\xba\xbf\xe0I\xa6\xe9\x02\xc9\xd4?*\xf0X\x12\x0fa\xe5\xbf\xb5\xf8\xed{bX\xe1\xbf\x15\x8e\x9c\xde\xe6l\xd5\xbf0\x93F\xec1\xad\xd2\xbf\xc7\xfa3 \xe8\x04\xe4\xbf\x86\xba\\\xd2f\xbe\xe2?\xd0\x9fj\x9ajs\xe2?\xa8\x1115h{\xb5\xbf{\\\n\x85\x1b\xef\xd0?\xd4\xdb\x00*c\xc8\xd8\xbfyc\x94\tP\x1f\xe7?\xfaM\xfc\xcaxh\xda\xbfl\x92\xde4S]\xe1?\xf9\x9d\xbbJ\xa4J\xc4?\x91V\'\x0f\x8c\xce\xed?\xaf\xa7\\\xec(V\xb1\xbf\xbe\xa3\xf0u.n\x98\xbfM}\'\x06-"\xe5?\xed\x8a\xb1\x87hj\xd3?\x85m\x7f\x9f?Z\xdf\xbf6\x16\xf7\xa6\xff.\xde?w-\xb7Xl\xd9\xe1?\xda\x95\x8c\xea\tf\xc8?\xa7\xc9\xfb\x02\xaf\xd0\x8e\xbf\xd2\xac(\xe1\x83\x14\xdd\xbfk\xaaP\x95\x05\xd1\xd3\xbf!\x80\x9dj\x90\x14\xd6\xbf\xf3\xd0\x0f\xd5\xae\x93\xa7?\x08\x8d\xd5\x1a\xbdn\xd5?:\xbdE\xcdLd\xb9\xbf\x04/Ob\xe3 \xbd\xbf\x15\x8e0\xd0\xbce\xbf?F\rc*\x92\x15\xd2\xbf\xf8\x19\x8e\x91\x95Z\xda\xbf\x8c&\xde\x97Go\xc9?\x0f\x92\x94l,\x17\xca\xbf\xd5\x18\xa48\xdbE\xa7\xbf\xb0FG\x9a\xf5\x08\xc1?\x95~\x918\xfd\xde\xe1\xbf\x86\x81\xa7\xc7V\xe4\xc1?>\xf1\x04\xa2J\'\xc4\xbf<\x1fZ\x0e\xaa\xc1\xe6?\xf3\xb1|rQH\xd1\xbf\xbc\xa5\xe2\xbb\n\x9f\xa5\xbf~V\x99J\xaa6\xd3?\xee\x10\xaa \x9d\xa6\xb3?\xa1^k\x9a\x96-\xca\xbf\x83\xe9\xcae\x8bS\xa2?\xe0\xee\xf6\x12bj\xd3\xbf\x9dB\xb4sh\xe8\xc5\xbf\xfb\x88\\\xb8\xc4\xad\xb8?\xddd\xf3\t\xcf\xc7\xe6?\xb0Z$\x0f\xb4\xdb\xdc?\xca\xfe\xb7\xc2\xfa\x15\xa5?\x16\x86\xd0\xc6{\x0b\xe0?H\xe6\xe2\x8f\xdb<\xd5\xbf\xe8\xa5\xec\xfb[\x93\xb1\xbf\x7f@\x98n[\xab\xe5\xbfv]\xbf\x02(`\xc9?PzK8\xcc \xed\xbf\x91Z\xbf\xf5#x\xe6\xbf\xd4<\xb0r\x90N\xdf\xbf\xe5&\x8f\xbb\xb1\xbf\x95\xbfX\xb0\x801+*\xd2\xbf\x1e\xa3ms\x0b[\xb3\xbf\xfb\xf2YJ\xea"\xb5\xbf\x83\x17\x08\xe8(\xfd\xe1?\xd0\xba;\x19\xb9`\xae\xbf<2,\x80\x1d\x98\xc8\xbf\x03\xb0B\x11X\x07\xd8\xbf*d\x97wC\\\xc2\xbfn\xde\x98\x0c\x99\xa2\xd2\xbf-\n\xa0\xf3K\xb6\xe6\xbf\xbc\xe6\x1dc_s\xb5\xbfk \xd3Y\xa3A\xa6?\xb5\x19\xcb\xc1o\xba\xd2\xbf\xfe\x88-\xeco\x16\x97?\x88\x869\x1a\xa2\xee\xdb?\xa3\x8d\xce\x9fq\xb5\xd4\xbfj\x819bb+\xe3\xbfx\x9a\x15\xc3W\x8c\xe5\xbf\x95\xee9\xbf[\x8a\xe8\xbf+\n\xf9\x91\x9a\xb8\xa6\xbf\xc7\x15@\xd31\xbd\x8a\xbfF|J\x96\xda\xed\xb2\xbf\xa6a\x0c7\xee\xe5\xb2?\x1c\xbdY\xc4h\xa2\xe9\xbf\xda\x9b\x80R\x9cB\xd1\xbfS\xacJq\x9c\n\xa4\xbf\xe1\x16U\xfd\x11\xc8\x96?\xf5\xa3}\xdf\xb8u\xe0\xbf\xe2\xdd\xd1\xdcL\xcc\xc4\xbfGd]]\xbb;\xb9\xbf\x8d\xa0\xee\x14\x9e\xbe\xe6\xbf\xad3D6\xca\xb5\xdb?\x03\xaa\x94\xd0\x11^\xd8?\x91\\\xe3\xbd\x86"\xa9?F\xaa;\xb3(\x98\xd0?\xcc7\xd5\xa4\x14\xdc\xd8\xbf\xdc\x7f\x08\xc2AD\xe3\xbf$\x04\x1a\xdd\x8c\xfd\xca\xbf9\x9f\xd1[\x97\xe6\x91?6\x8a$%\xbeG\xc0\xbf\xbd#\x8e\x94\x99\xce\xcd?\xfbk0\xe4\xa7\xf5\xd3\xbfI \xee\x94\xa2\xaf\xe5\xbf\xdb\xe6\x86\x10\xb9\x9e\xe2?\xf0\x1d\x7f\x90\xc1\x8f\xc5\xbf9j\xff\xd3S\x8c\xc0\xbf\xfa\xa8\xac\x17\xdeK\xd4?2 \xaeL\x92\x1d\xca?\xba\xfa\xb2\x0e\xae\x16\xc0?&,\\+W\xd3\xd9\xbf/!x\xb2A\xf7\xbf?\x13\xcf\xfa\xa357\xcb?\x02\xc0\x13\xc6vM\xd1\xbf\x16\xa6\xb63\xfa\xae\xcc\xbfJ\xaa\xdf(\xe3\xe8\xd0\xbf\x02\x02\x8e,\xe2)\xea?y\xb8\x9d\x8a\xa2\xce\xbd?\xc8c\xb7\xe3i\xd9\x9f?\x01\x04\x1b\xa3;T\xca?f\xae\xdf"\x9c\xa6\xc3?\xd4\x0e\x84\xb5\x91b\xb5?x\xd9\xcf\xcd1\xe5\xc5\xbfYIaP\x89\xd7\xea?f\x8aK\xdcx\x94\xcb\xbf\xc4\x8f\xf7\xf2:(\xd3?B^\x85\xb7\xd8\xb1\xac?\x15@\x11\x88ug\xec\xbf\xce1f\xaa\xf5\x8b\xe2?\xaa.|\x15\xcb\xb0\xe0\xbf\xc1r9\x01n1\xdd\xbf\x95\xef\xd1\x07S\x0b\xef?AJ\x98\x8a\x99\xa6\xc7?\xb7\xf4\xafi\x89\x13\xe4?\xa96\xe4\xbd\xed\x87\xce?\x16&\x7f\xaf\xaa\xb0\xdc\xbfx\x82_4\x807\xe8?\xa0\xbb\x9d\x9d\xef\xb2\xb9?\xab\xe4\t5\xf2\xdf\xea?\xfbE\x96\x00\xf6[\xf2?\xe3\xd3G\x07\x87\x95\xf1?\xe4\xba\x9a\xf6\x94\xcd\xcf\xbf\x87\xc5\xea$ E\xb4?\xda\xd4M\xac1\xd3\xe3?HI=.\xa8\xfd\xa3\xbfK\xc4\x82Ta\xf2\xd4\xbf\xc4\xe3R\xac\xcdd\xcf?\x8cd\xab&\xeb\x0f\xf0?\nhEN\xdb~\xda?\xa9\\\xafu\xbd\xc5\xd5?\xbd\x11\xcdI\xcb\x03\xd9?\xdd\xeb\xae_0\x9f\xcb\xbf_\x18J\xf3\x8c#\xbe?\xca\xd7\xff\x98*\xcb\xc1\xbf\xa8B\xf9!2\xcb\xb3\xbf9\xde\xde%C\xac\xef?\x17\x13W\xc9\xc3g\xda\xbf\xaa/o\xe6\xf7E\xb4\xbfd\xfc\x9fe\xb7\xb6\xcb?no+\xc3\x81\x03\xea\xbfO\x89\x01d\x1c\x18\xe4?\xf2r\xb7\x1c?N\xb4?\xfd\xe4\x14u=d\xc5\xbfDF\xf5\x9ba\x92\xcb\xbf\x92=\xed\xf8\xb3\xefh\xbf\xe0\xe0\xbeF\x1e\xcb\xd1\xbf\x01\x0bw\x04&N\xbb\xbf\x8b\\S\xdeGd\xf4?\x14\xfd\'(j\xc1\xe3\xbfp\xebl#\xc1\xc2\xd1?T\xe4\x94\xf5\xcc\xce\xc2\xbf2\xe5\xc7|\x94\xb8\x7f\xbfdX\xc0Nh\x17\xc2?\xed\x9f\xc4|\xb0x\xcf\xbf\x8e\x97y(\xbba\x95?\xc1\xdf\xf5\x0f\xe2i\x8c?\xf6\xe1\xc0\xdb\xd5\x80\xe4?\xb7\xd2\xc9\xf5\xa59\xd3?\xd1\x8e\x1b\x80&\x94\xd3? \xc2"E-.\xc9\xbfC\xecI\x1d\xfc\x8c\xdc?\xcf\xabwR\xf6\xa9\xe1?-,\xb8n\x8b8\xc2\xbf|\x15\x9d\x89\x11[\xdd\xbf\r\xae\xabe\x0b/\xe6?z\xc72_\xebP\xd1\xbfov\x00\xeb[C\xc4?\x81\xc3\x8btBK\xc4\xbfW\xbd[V\xb3\x98\xe1?R6\x1dEk\xc7\xcc\xbf\xe1\xc3j"Z\xad\xcd?\xcb\xee\xb5 (\x8d\xc5?/\x15"\xd5\xf1\x8d\xd4?\x1e\xb22q<\xe8\xd2?A$\x0e\x00w\x13\xd4\xbf%\x95O\xa1\xfem\xba\xbf\xf1#\x9c\x82v\x02\xd2?=\xc8.\xf0-\x9f\xe0?$\x17\x18L,\xc1\xb4\xbfHu`\xe9\x17h\xd1\xbf/\xea_~v\x9d\xc6\xbf\ra\xde&<\xa1\xdb\xbf\x9b\xe7=8Q\xb4\xbe\xbfv\xa7\x1c\x8d\xa9!\xe4?\xfc\xd3\xc9\t=\x9a\xd2\xbf\x99W~6\x9bU\xec\xbf79\x81\xee/\xde\xad?\xb9j\x15\xe4?\x1c\xe5\xbf \x8c\x96\x16\xd7\x9a\xb8\xbf\xdcd\x07\x94kD\xdc?@\xf6\xa5\xcc\xe6l\xeb?|\x8e\xb2\xaf\xa5\xa0\xd2\xbf<\xc1\xc0a\x87=\xe8\xbf\x9e\x10\xc6\x80\tg\xa1?G\xb8j\xd0\xc8`\xd0?A\x9a\xe5}_\xa4\xc3?\x0e\x14\x04\xe6\x95\xc9\x80?\xf3\xfd\xea\x93G\x9f\xdc\xbf\x96\xc0\xca\xe5\x89B\xb2\xbf\xfd\xcc0\x90\x06\x10\xe6\xbf3TP\xd2\x07\xcb\xd4?\x14\xb1\x86\x83n%\xc2?\xe9M\xb0-p\xbfY\xbf\x88.\xbf\x13\xe2\x0f\xc1?W$^\xe0\x9f\xd9\xc8\xbf3A@\x94\xff\x07\xd4\xbf\x0e\x97\xd7k\x7f\xd7\xd7\xbf\xdfs\x87F\xb7\xb6\xb1?_\xbd\xafu\xb9\xe0\xd4\xbf\xa7\x13\x08\x85\\(\xdf?\x9b\xbc\xdd$h\x92\xdb\xbfV\xc9\xa5\xbcWq\xdd\xbfEE\x1f\xd4\xa0#\xe1?>}\x13\xb5\xa1~\xe5? Xf\xc6\\\xb6\xc2?\x1d`\x02\xd2\x8c\xf8\xb9\xbf\x1e\xfd\n1\x8a\xed\xa6\xbf\x18u\xa5\x83]\xc3\xb1?l\x0b)\x99Hp\xd1\xbf\xd9\xde\x1d(X\x8a\xdc?\xdd}Ytz\xf6\xd5?\x92\xca5\xb1_\x9a\xd5?,-\xe6\xef\x930\xba?\xc8\xbb\xe8\x98\xaf\xd5\xde?\xdd\xda\xd2ag\x97\xe1?\\\xe1zY\xa5\xcc\xb6\xbf\xa4\x95\x16\x8ad\xb9\xb7\xbf\x1e\\\x82\xf5\x9b\xb8\xe1?\x89\x99\xb1\x98S\xb7\xd3?\x7f\xbc\xb7\x0e\xaa`\xc3?jz\x1b4\x17\xfd\xab\xbf\x86e\xae\x08#\xc9\xe9?\x1e\x02J\x07>\xad\xc4\xbf\x16\x98sq\x05N\xb0?\x98Q\x0c\xf59d\xe0?\xdf\xd5\xe3F\xb8\xce\xea\xbf\xe8\xe2\xc0\xeb\xf5\\\xea?M\xb4\rdKG\xec\xbf~\xe5;\x1be\\\xdf\xbf\xf9:X\x82\xc6\x04\xdf?\x01XG\xd5\xb4]\xe2\xbf\xcf\xfc\xa2;\xd1S\xd2\xbf\x80\xdap\x1a\xee\xcd\xab\xbf|c\x1bw\x1f<\xd3\xbfS\xf7\x04\x94)\xd4\xd3\xbf\xbc\xbe\x9fo\xd3\x07\xc2\xbf\xfcz\xc2\x11~\x94\xe1?V\xcf?B\xa4\x1c\xf3?\xdc\xfa\xfeI\xb5B\xa5?\xa6\xe6\xa3\x81\x8a\xea\xdb\xbf\xc2\xabf\x11\xe6 r\xbf]eA\xa6\t\xf2\x85?\xc5\x0f2e\xe4E\xe2\xbf\xa9\x8d\'\xfclg\xcf\xbf\x7f\r\x01\x07\xd7\xcb\xe3\xbf\xafg\xe9\x1f\xc5\xcc\xd5?Q4\xab\xf4\x15R\xb8\xbf],`M\x90O\xb0\xbf,\xe2\xed\xe5BG\xf2?\xefN\x83} T\xdb\xbf~\xa9\xd4\xf6\xa2\x0c\xd1?\xd0\x9e=\xe1*\xc9\x99?y\x99r\x1d\xa9\xe3\xd9\xbf\xbam\xfbv\xed\xa1\xdd?NWg\xcb\xfc\xaa\xe2\xbf1\xfdux\x0cm\xe0?\xc7i\xe9;z\xe0\xc8?\x9d\x9a\xf4\xb7bt\xef\xbf\xfe\x91d\xef|\x89\xbc\xbfWFJ4\x19\x0e\xc3\xbf\xfb\xf2\xec\xb3TP\xb0\xbf\x81\xc9\xee\xe0\xb9\xf9\xea\xbf\x98k\xf0\x13\x8c?\xd9?\xb7\x8d\x0f]\xfc\xf3\xa4\xbfs\xb7\xde~w\x13\xe1\xbf8\xa5SFO\xfe\xe3?_\xdc\x9e\xdd\x9fM\xee\xbf\x18\x80\x11\xaf\xc2\x8c\xbc\xbf\xc2O\xb9P\x99\xfe\xe9\xbf}\xb1.\xc1\x95\xc6\xc7?\xdb\x8b\xd5`\xf3\xa9\xa8?Q?\xcf\xe1c\x1c\xc9\xbf\xa7\xbb\xfa5\xa4\x0c\xd4?\xb2#\xa9\x0e\xb32\xcc?\x9ce<<Y\xbf\xdd?ru!\x1b\x1f\x99\xe1\xbf\x15\xbe\xc3\xaf\xea\x81\xb1\xbf\x8aLr\x0e\x98\x1d>\xbfo\x8e\xb6}\x9e>\x97\xbfT\x83\xe4\x194.\xf0?\x8dIDi>F\x9d\xbfCw\x9cwN\x88\xa1\xbf\xbd_ \xc4`l\xe1?\xb5\xb3\xe9 \xba~\xd0?Q\xa2\xcd\x12\xa8\xfe\xd3?K\xdf\xa3\xf9k\x0e\xa0\xbfE\xa7\x9b$\xdb3\xe2?\xca\xf9zJ^\xdf\xd6\xbfR\xeb\x8d\\\x83\xf6\xb2\xbf\xfc\xd9\x8cw\xc1\xfe\xd5\xbf\xa9\x0c\xcc\x83%\xfbN\xbf4\xefS\xdd\'\xc9\xa9\xbf\'\xdd\x02\xbaN\x8c\xe0\xbf\x86\x11\x14\xe9\xab\xba\xd1\xbf\x02\x05\xce$z\\\xbb\xbf\x85\x8b\x9c\x94\xdf\xa4\xf1?\x82\x93+@\x85\xfa\xda?\x07\xba\xae\x97\xc7\xba\xb8\xbf\x10\x1a/B\x91\xa1\xe6\xbfw\x88\x9d\xe3\xff\xb3\xea\xbf\xc8\xabXx:\x14\xe0\xbf\x0bD\xaa*6\xb4\xe9?\x0e!\x8166\xa9\xe9\xbf\x937\xb62\x01P\xed\xbf\xba\x06>\xe9\x05\xf3\xea?\x14\xe1\xeb\xe0Z\x84\xe0\xbf\x94\x8f\x08\x06}&\xd3\xbf{\xb3\xe07\x98\xc5\xd9?\xc9\x1b\xba\xc0\x00F\xec?T#\xd0\x0b\xb8\xdd\xc2?\xa5\xf4q\x9f\x12\xc8\xe0\xbf\xd4K1\x0eO\x86\xe7?Z\xe62\xcb\x9bq\xcb\xbfk$\x07\xa2\xe1I\x8d\xbf\xbei\x18\n\x9b\xfa\xbf?2\xad\xb5\xe1\xb4\xc8\xb8\xbf\x80\x9e\x86\xfau\xc7\xcb\xbfU\x04@\xcb~F\xe2\xbf\xdf\xaf\x1b%D\x95\xde\xbfda\x81%c\xb8\xde\xbfw\xb4gV\x1a\x7f\xca\xbf\x1d\x87}\x16\xcbW\xd9\xbfa\xdc\xbc\xfd\x13r\xb1?\x1c\xe0\xa2up\xfd\xa1\xbf\xed\x02L^H\xb7\xa1?\x82n\xc1\x80\x89O\xcf\xbfy\x9d0\xf7\x014\xde\xbf\xc9\x0bv~\xca\xeb\xaf?\xbe\x18\xa7\x1b^\x07\xc3?:\n&\xf0~\x8e\xd4\xbf!=\\\x05\xef\x16\xcb\xbfc3\xfff\x00\xcb\xec?M\xcd\x80\x10l\xd4\xbc\xbf{f^Z\xf6\xc7\xa5?ks\xd1M\xd5y\xd2\xbf\xe5\xfa\x95\x9b\xd7\xe3\xcd\xbf{\xd0eT\xa1\x97\x97\xbfD\x80\xd8\xf5\x8b?\xbf\xbf\\\xa9\xaaZ\x1c\xa4\xc6?\x02\x87\x08\xd2\xf3,\xa2?l\xe7\x7fn0s\xda\xbf\x08=\xb2c\t\xe0\xf1?R\xa0\xeb\xaam\x9e\xe0\xbf\xeck\x1fhn`\xc4?N\xe2dn\xc3E\xca?\x94\xb9\xb7\xbalw\x80\xbf,\x10@a\xf6\x0b\xca\xbf\x95\x11\xfe\xa0\xbam\xe2\xbf\x01\xad\xd9\xae\x1f\x82\xc1?\n\xb6\xa5Kr\x04\xd5?\xb7\x10\xcb\x0e\xb9@\xe2\xbfd5\x02\nAy\xa1\xbf6\x90\xf5\x04\xa5\x9a\xf2?_:PHX\x18\xd2\xbf\xb96)%\xa3\x7f\xe1?\x118\x00Nem\x82\xbfI\r\xbe\xe8\xfe$\xb1\xbfb\xba\x83\x948m\xb4\xbf\x9a5\xee\x86u\xb1\xe9\xbf\xb5Q\xba\xc7\x95I\xc5?\x13v\x1e\xb5\x08\x95\xbc\xbf\xeeF/\xe0\x14\x84\xb0?\x96\xff\x85\x18\xad\x05\xe4\xbfr\x00oh1=\xb4?z\x16\r\xcd\xb1\xa2\xd2?6{-\xa3G\x9e\xbf\xbf{5\x84\xd0\xe5{\xd1\xbfk\xdc209\xb0\xb6?b\x8apG\x1fS\xda? \x86LE\xcdJ\xdf\xbf\x0e\x12\xf9\xdd\x01b\xee\xbf\xb2\x93\x9e\x9d\x83i\xdd?\x88\x0e\xa7 t4\xea\xbf\xb7\xb8+[pmS\xbf,\x039\xe0\x8b\xa0\xde\xbf)[\xd8]\xfcr\xc5\xbfk|\xe8\x01\xceN\xe5?\xd3j\x82S)\xec\xcf?\x036_\x1e\xee\x02\xed?{Q\x16\xcc\x84\x9d\xbc\xbfQ\x88\x96i\xe3\xfc\xd6\xbf\xe6I(\x94\x0c\x8e\xcf?\xccR\x93g\x93\x83\xe5\xbfk7eP\x9e\xf9\xb8\xbf\xf4q\xbfr\xefD\xe9?2\x11\x8e\xf0\x95r\xd5\xbf\x1d\xcd\xd0Q\xc0\xcd\xbb\xbfb\xf9QQ\xd5\xe8\xdd?\x1cof\xc8\x8b\xbf\xd3?@\x0e9\xaehk\xe4\xbfX\xe6\x1b\xd4\x88\x85\xf0?s\x91\xd7\xa1\x07\xd6\xb6\xbf\x8da\x0f1[D\xd8\xbf\xa5Y\xd7\x1d@\x8b\xad?\x11\xbebs\xd5\x9d\xe0\xbf{\x93\xa2\x17Y7\xd7?L\xd9#\xe4\xed\xed\xf3\xbf:[\xce\xb4p\x08\xbb\xbf\xbbc\xed\x1a!\xa6\xbb?\x035N*\x03\xe3\xc7?h\x064\xde"\x93\xcb?X\x111\xaa\xbf\x9e\x97?;\xd2\xd0\xbe6\x0c\xcd\xbf\x0f]\xbcf\x91\xdb\xdf\xbf\x7f\xa0\x9c\x17\xdfQ\x9e\xbfy\xb0\x03\x05}\x1b\xa0\xbf\x86\x0c^\x80\xc1\xe5o?\xc1\xc3a\x1e\xae\xb2\xe7?qg\xf7G\x00B\xc1?\xec\x11\x84\xbd\x17\r\xd7?\x01\xe8ly\x1f\xfd\xc5?\xc3\xa6!\x95\\n\xed?\xcd\xe14<7\xcb\xe4?\x8a\xab\x00\xa1\xd7P\xa2?\xe7\xe35\x84L\xd7\xe2?n\x82\x81\x15#S\xde\xbf\xf6^\xa5\xe7\x80H\xd3?\xc7d\x9fe\x9f\xab\xc1?\xb7\xf1]\xb9\xfd\x1c\xc2\xbf\xcc\x8b\x84\x9a\xc8 \xdc?\x0c\xc6\x02\xb8\x16T\xe4\xbf\xfc\xd8\x00ir;\xc6?}\xf5\xc9\xff`?\xc3\xbfD\x1d\xdb\xd0\xf7\x93\xe2?\x9c$\x06u\x99\x8f\xef?[\x7f\xf9\x94\xf4\xc6\xc3\xbfTF\xaa\xe8\xc3\n\xe1\xbf?d\x8a2\x01v\xe7\xbf\x08\x7f\xb3d\xc3\xbf\xa0?!d\xaa\x8f\xd6,\xb2?\xb0\x07\x913_}\xd2\xbf\x9e\x18\xebybP\xc3\xbf\x8cy\xe6\x02\xb0\xf7\xe2?\x15\x9e\x10\x18\xd5\xaf\x95\xbf\nw\xe8\xe94\x1b\xb7?m\'wt\x82\x83\xe0?\x7fP\xb3\xd1+\xc1\xe2??n\xd1\xf2\x19_\xc4\xbf@50\xad\xd8\xc0\xc2?\x02\n\x17\x87/\xc8\xb9?U\\\xb8\xee8\xc8\xd1?\xcb\xc9\x0fR\xc0;\xd9?\xa1\x91\xf3\xb0\xab\x1c\x8e?}\x1cg,\xf8\xac\xd5\xbf\x8fs\xdd\x9c\xd4\x94\xb1\xbfA\x1a\xe0lw\x9f\xc5\xbf\xbd*\xf5Ik\xd7\xd9\xbf\x88\xcc\xe0[\xcc\\\xd2\xbffy\xa5Q\xd4\xbb\xdc\xbf\x0f\x0e\x855\xab\xc4\xcf\xbf\xa1j\xfe2\xa7\x00\xcf?vo\x18S\x1d\xda\xf1?\x11\x10\xf4\xf4\x93\xa2\x95?w\x95\xd2T:\xf0\xcc?\xc0\x93\xbfE\xcd\x1e\xdf\xbf\xe3\x08\\ \t\xb3\xe2\xbfdN\x95<|\x11\xac\xbf\x14M\xb2fQ\x8f\x9b\xbf\xf69\x88\x0e`\xa9\xeb\xbf[\xbe\x7f\xd5-5\xd9?>\xcfz\xcc\xef\x1d\xc8?\xf0S_=2\xc7\xd2\xbf\xee\xa2y\x9e\xc7\x99\xb2\xbf\xe3wZF\x05H\xc4?.\xb7<\xdf\xa8\x92\xe7?\x8a\x95\x93\xba\xbel\xd4?\x91,\xa0\xdf_W\xdd\xbf\xcer\xe6A\xa5)\xb0?\xbf(\x1fW\x86\xee\xc2?\xe2~D\xbfY\xe9\xe5?p\r$\xbdZ\xad\xe6\xbfs=rX\x9e\xaf\xd3\xbf\xd5\xf1&Bn\x87\xba?\x19@,\xe9\xa1\xa1\xde\xbfK\xb7\xb7c\xf1\xb6\xac\xbf|\\\x96\xcb\xfa\xb7\xe6\xbf\xe2\x19\xaa\xb7\xa3\x01\xc7?\xb2\x8ab\xee\xf5k\xba\xbfG!F\x92fh\xb6\xbfV\x18lB\x06\x0c\xa1\xbf\xae\x05\xd1\xee\xe1\xa0\xe5?=\x7f\xd8x\x82\xfc\xcd?V9\x87Fx\xc5\xd6?\xda+ \x9a\xdd\xd3\xac?\x96\x00\xba\xba,\xdb\xc6?\xf8\xa1q%;;\xe7\xbf2(T\x0c\xb1>\xe7\xbf\xf1\r\x99\xc0\xcd!\xba\xbf\xef7;\x7f\xed;\xb1\xbf\xfb\xc3nQ\x88\xd2\xc0?b\x1a\x7f\xd58\xa6\xeb\xbf\xdf\x81\x04\xf7\t\xa1\xb6\xbf\x0f`\xb9\xefg\x17\xd8\xbf\x17\x1b\xe4\x96{\x94\xe6\xbf\x10\x8d\x94\x92\xf5\xf6\xe6\xbf\x11\xa6\x82\xbfT\xb7\xb7?\xef\x82\xa7\xc2\xd1\xe3\xc0?\xdf\xc0\xaf\x88m\x16\xed\xbf\xedy\x80\xa0\xa5k\xe9\xbf\n\x89d\xca\xb3\xe7\xd6?\xb5\x8eT\xa6"\xd0\xec\xbf\xf6\x1e\xeb\x10\xa7\xf7\xdf\xbf\xaf\x01\xc4{\xd5\x19\xdf\xbfr\xdd\xc7mF(\xd0\xbf\xdf22\xd1\xe5\xfa\xb6\xbf\xc7\xf18\xe0\xfc\x93\xb3?\x91`\x8a}\xec\xa6\xc6?\xedL\x81\x04P\xc3\xa2?\xa3)$qS\xde\xc1\xbf\x03\xc2l\xa4;\xf1\xd1\xbf\t\xa1\xe8\xad\xcc\x81\xe3\xbf\x01\x08\x10a\xeai\xad\xbf\xa1!\x92\x15\x91k\xe1?\xaa\xc5S\xcc\xdc!\xc6?\xbb\xaaN\x11\x98\xb0\xdc\xbf$\xea\xca\xa1\xee\xcc\xab?1\xe6\xf9?\x0b\xc4\xce?|\x8a\xa8]\xa1&\xd8\xbf\xe2%\xb5M\xb8\xb4\xe7?\x84\xc4\x89\x8dT\x9a\xcd?!\xbfi\x93\tn\xe1\xbf\x1a\xe4\x8f\x81F\x8a\xe3\xbf\x8a\xc8s\x01\xb0\x8a\xcd\xbf0Qc\x84\xd1\xd2\xd3\xbf\x19\xf6tS\x13\xc5\xd7\xbf\xb7\x83\xc9\xdc\xe1k\xd0\xbf=\xe2\x19\x96\x12%2?\x08\x9a\x14\x1d3v\xbd?zF\xba\xe1,\xd0\xc5?(v{u"\x9b\xd1\xbf\xf9\x96\t\xd7\xf7\xc0\xd7\xbf\xe1\xd1I\x8f\x9f4\xe8\xbf\x91~\x01\r\x8b\x88\xd2\xbfmIS=8\xf5\xbb?l\xcf\xd8\xe6\x15\xc6\xcd\xbfG\x00\x0c\xae\xd7\x12\xd3?\xb2.\xa8\xbdb\xd2\xbb?\x8d^r\xf5\x86G\xd6?\xd8\xd4\xc6~\xb8\x92\xd5\xbf\x8bGI\x0eX}\xe8?\xbe\xe4[\x8a<\x93\xcf?\xbb\x05\xd4f\xd3\xb9\xc9?,\x83\x15\xf0&K\xb8?\x13\x03\xb4\xdcO\xb5\xda\xbf(i%\x82\x8e\xe7\xd0\xbf\x14\x9d\x9e\x10cC\xc2\xbf\xb8\x88\xb0\x8a\x1ab\xd5\xbf\xcd\xa4\x01\x07\xc1\xd3\xc6?G}JY\xea\x91\xd1\xbf\xd6\xd1h\xab\xe1\x1c\xc1?\x87;\xcbG\xfb,\xd5\xbf\xa6\x847uM\xc6\xb8\xbfD\x9c\xf5\xcd\xb5B\xea?\xc7\xe7\x1f\xd2/*\x9a?\x94\xdaa\xe4|\xc8\xe5\xbf\x93W\xf2x!\xc8\xe1\xbf\x06\xe8\xec\xd6\xba\xb1\x8a\xbf!\xcd\x01\xb2mq\xc2\xbf]t\xabQ\x80\\\xd6\xbf\xd4\xef\x01r\xd04\xd7?GH\xaf\xb1\x14Y\xd6?\x15\x93y\x02\xd4O\xde?%]\xe3\xc2\x16\x91\xa5?\xe6\xe6K\xe1\xb4|\x94?\xe5Wo\xd6\x1cT\xca\xbf6\xaeLq!P\xcb?\xd5\xce\xe6|/<\xd6?\x153\xa7\xe7\n\x89\xc2\xbf\x85.\x9es\xad}h\xbf/\xc2\xbd8 \xc7\xb0?XQ\xcd\xa0$6\xa7?\xb7\xde\xbc\xd5\xd9\x9d\xc1?\xb4\xd3"\\p\x7f\xd5\xbfc\x16\xf9\xd5\xf8n\xd7?\xbef\x89O\xb9\xba\xe2\xbfw\xa9\xe9:\xd6\x95\xde\xbf\x08\xb4\xae\x9c\xfe#\xdb\xbfX\xcat\xc9\xe7\x13\xe1\xbf\x9c:\xa6F\xf4\x0e\xde?}7-\x02\'\xa4\xe7?\xb0b$X\x90\x0f\xd6?8jH\x9b\x89\x07\xae\xbff\x1fz\xdf\xe9\xe9\x9b\xbf\x93z\x93\x9f\xa1=\xe2\xbf7g<\xf50Q\xd1?\x83\x14\xd3\x1es\x81\xd4?]\',\xb8yQ\xf2\xbf\xf4\xe9|1\x8d\x1e\xc4?S\x85\x81\xa5Q+\xc1\xbf\x85\x9cB\xf1F\xfb\xa1\xbf\xb6\x16\xbfL\x92\xf9\xa4\xbf\xc5\xaa\x1fq\xf00\xb4\xbf\x1d\xbb\x0f\xb2\'\x99\xe3?N\x92\xc7\x85\x87F\xc1\xbf\x01N\xe1\x84\xb1P\xdf\xbf\xf1D\xeb&\x99(\xc3\xbfT\x19\xe1\xb4\xbbZ\xb6\xbf\xa6\xa9\xe7\x1e\xcax\xb3\xbf.G-\x92\x8c\xb5\xec\xbf\xd2\xb7O\xe1\x9fh\xc6?\x984\x9aK:\xbf\xac?y#\x04rK\xf7\xe0\xbf\x91\xf4A\xf5\xba\x1a\xaf\xbfQ\x8a\xc3\x99\x85\xfc\xe1\xbf\xa2\xbd1\xddk.\xc5\xbf\xab>\xb6D\xc5\xe6\xc8\xbf\xb1\xdc\x1a\xa86Q\xc6?F\xe6\xef\xd5R\x8e\xb6\xbf\x10\x02cMD\xe0\xd4?v\x9c`\xce,\xe5\xeb?\xd8\xca\n\xc3\x14\xb8\xc2?\x1d\xa6\x9d{\xa3;\xe1?ZP2\x16\xbc>\xee?k\xb8\xa6\x83\x8e\x11\xea\xbf\xa0Y\xc6\xb4\xd4o\xca\xbf\xc1\x86\x06\xe3*\x19\xd3?o\x17\xf6\x02e\x8b\x84?\x9c\xc1\xab\xf48\xa9\xe0?\x87\xaalV\x98d\xe0\xbf \x8c\x84]\xb1\xdb\xd7?\xafm\xbe\x99\xc8x\xe9\xbf\xcb\xaci\x83\xab\x86\xde\xbf\xd0|\r\x8fIt\xe8\xbf\xd8\x0f\xccm\xf9*\xc6?\r\xf1i\x81\xa7\xece\xbf\xf9\x0f\xc57\x9c$\xe5\xbf\xd7^g\xcc\x93\xb8\x93\xbf`\xe0\xf0x\xe4\x00\xe1?H\x9c!\xdf\xa0\x17\xc2\xbfu\xe3N\xa1\xee8\xdf\xbf\x18\xdaQ!G`\xb7?0\xd3\xc7:\xb7\xa4\xa9\xbf=!asI\xe6\xc8\xbf\x11\xb1\xd5U\xf8\x0e\xde?^\x87\xd3\xf7\xf5\xc3\xc2?\xf1\x82\x17\x93`\xd3\xb8\xbf|\xaf\x98Njt\xb7?\xc9\xb98\xe1\x10\x12\xa3\xbfm<\'\xe7\x86Xr\xbf\x7f\x04\x8c\x9e\x1e\xc3\xc5\xbf\x9e\xf6\x83\x87~r\xba?:\x12Yx\xdb\xcf\xea?-:\xc7\xa0xk\xc5\xbf\t\x87NT\xf4\xb1\xb1?+\xa9u{\xbf\xca\x97?}\x8e\xc86\x11\xa6\xd1?\xb4\x92T}=\xff\xdb?\t\xbe\x86\x96|n\xc7\xbf\xe1\x84$p\xd6c\xb1?cwV\xe3E\xe5\xe9\xbf\x06\xbf\x8a\xa3e\xd9\xe3?Kh\xb0H\xef\xdb\x95?[\x84)\xf0\xf7\x84\xdc?\xb1od\xa5\xa2\xad\xcd?\x0f\x0eXdJ\xc7\xae?\x86\xc9\xe9\xc1\xf0\x82\xb3?\xc7|\x95\xe9Jm\xd6?oO\xea+\xbb\x16\xcb?\xd1\xa6R\x94\x82\x07\x9d?\xb0\x82\xffk\xbb\xae\xdc\xbf5\x06\x9c\xb4\x1b\xec\xc7\xbf\xaa\xa9\x8b\xfe\xb7\xde\xc5\xbf-\xf9\xe4\xb4\xcc\x98\xda\xbf\xecA\xc4\xbb`\x0b\xcd?!\x96J\xafo\xd9\xb6\xbfh\xd7sC ]\xe9?1\x98\xcb\x03\x13S\xd2\xbf\xa7\xdaX\xd3#\t\xee?\x9f\x95s\xb5\xb4\x8d\xe4?Y\xd5\xe4>\xa6$\xe7?\x7f\x01\xeb\x1a\xc4\xe5\xbd\xbf?\x04\xce\x05\x87\x9a\xc0\xbf\x93\xd6\x9b\xa9\x11\x92\xae\xbf\xcb~l\x10\xe3H\xb2?\x80?\xcd\x1ap\x1f\xd4\xbf\xb6,H0\x95\xf0\xaf?\xfb\x0e\x14\xf0bu\xdb?\x10\xfaRDpJ\xeb?\xfa\xebq\x92\xf0\x8d\xb1?\n\x1a\xdc\xbb\x1e#\xcf\xbf?\xb3\x0frz+\xe6?C\x13\x1c\xceCJ\xb8\xbfQ\xb7c\xc4\x96\x04\xcb\xbf_f4\xf9\x84\xf1\xc3?\xbf\x97\xa6\xe0vI\xc4?\xaaV\xe1\x8e\xd7<\xe4\xbfH\x17\xcf5\xf5O\xc8?\xcd\xcb\xed\x96\xca\xec\xf0?6\xc8\xe0S\xb6Q\xd9?\x87/\x92\xffws\xf2?"\xdf\xfaU\xd0\x1f\xd5?V\x03*Mcd\xd0\xbf\x07u\x1e\x86\x99\xf3\xd1\xbf\x10\xff#\x8f\xe1\xea\xc0\xbfnj\xb3\x8c\xa0\xd2\xee?]\x9a\xe9\x0b<\xff\xb4?y\x19,\xe3cum\xbf\xe3m\xa6k9o\xcb\xbf\xf7K\x96-\xc5g\xe0?\x0f\x11\xb5\xa100\xbf?\xca\xf2\xe4w^m\xdd?\xa8C=y\x8f\xef\xf1?\x94\xbb\xdfb\x18D\xd6\xbf\x00Up\x88&\xab\xc7\xbf\xe2\x1eY}\xf7\x97\xbd\xbf\x9c\x10\x16\x11\x99\xac\xad\xbf\x83\xa9He+\r\xdc?\x8e\x84&\xd2\x82-\xce?\x95h\x83\x0b\xb8(\xd5?1\xe9\xcb\xd0-\xac\xa2\xbf\x9a\xef\xfd}\x80C\xe4?e\xbb1\xbf\x91,\xa0\xbf\x13\xc6\xad\xfd{\x02\xc5?&>\xde\x92\xb6\xcf\xee?\xe1i\xde|A\x99\xda\xbf\x85\xcd\xdc\xdd\xfd\xd6\xb1?c\xa0\xcaR\x8c\x93\xb1?\xf5\x10\xa9\x08\x8d9\xc2\xbf\xc5$\xf80\xbd&\xd0?\xe4\xc6\x1f\x83\x8d\xe7\xb9\xbf\xbc\xa6\xe0\x15-D\xda?s\x1dx.\xabk\xc3\xbf\xb1fW\xc1c\x89\xd2\xbfV\x15\xd4\xb1\xc0\x05\xc3?K\x17a-\xf2\xd8\xce?\xdf\xddn\x9c\xaer\xd6\xbf`\xdcl\\\xfb/\xe3\xbf$Z"D\xb8\x83\xad?}\xf4\xe1\x9f 1\xc6\xbf@$\x00\x15Y\xcb\xa4\xbf\xacR\xf5\x03\xcb^\xc1?9!\xc9Ic\x12\xc8?.\x08\x96\xbe\x96\xda\x96?8\x96b\x89\xac\xdd\xe3\xbf\x9cZ\xdf\x05\x9f\xcf\xdd?L1B\xb9&\x9e\xc8\xbf\x99\xd6&\xc1P\xb4\xda\xbf\r\xd9\xf3\xaa\r\n\xea?O|J\xc2\xb7\x92\xe0\xbfQT\xb4\xd9\x94l\xe0?\xd2))\xa8\x07\xdc\xe5?\x96\xe8 \x1b\xa8"\xe7\xbf\x867\xc8\xe19\xcb\xcd?\x96\xcf\xb4\xf8\x01,\xad\xbf\x96\x95\xc8\xbbix\xb2\xbf\xe9\x98\xcfd\x8b\xe9\xd1?\\\xec}\xf4A9\xbd\xbf\xe9\xc9\xf1\x1c}\x80\xa2\xbfS\xf2\x0b+@\xfa\xe9\xbf\xc3C+Ri\xd8\xe1\xbf\xcb\x83\xee\xe7\xc1\xf2\xe1\xbf\xcc\xaf\xe3\xf1\x9f\x1e\xce?;\xed\x06!\xb4(\xbf\xbf\xd5\xe2`\x9f\\\x11\xc1\xbf\x05\xe3#C\xa5\xf8\xdb?\x93\xc2\x88r\xaaO\xcd?|\xc3\xf6\xe5\xe1\xbe\xd0?Tg_\x16,\x04\xe2\xbf\xe8I9}\xc3\x01^\xbf\xc1\x0bX\x16\xddh\x8b\xbf2\xe6\'+L\x97\xd9\xbf\xc8/\xd6q(\xe6\xd3?\xe9\x1bv\x00\xf9\xda\xd4\xbf\xad\xdc\xee\xb2o\r\xb2?\xe8\xe2\xa5\xd0I|d?\xa29 ;L\xdd\xda\xbf\xc7\xe6qc\xce.\xe4?\xdc\xa0\xe1i\xb6\xa3\xc4\xbf\x80\x11\xf9\x81\x82\x17\xd9\xbf\x1a"\xfc\x8b\xe0\x9e\xec?kYu\xd0:n\xcb\xbf\x14s#;\xe37\xb2\xbf4\r\xd4?\xa0\xda\xa1?n\rZ\xfa\xaam\xe1?m\xc8R\x00\xce6\xd8\xbf\x9b#\x00k\xab\x12\xba?\x88T\x96\xbd\x0b\x95\xe1?\xb2\x03M\xf2\x9f&\xea\xbf\x1f\xe7wg\n\x9e\xeb?\x1f\xe7\x10\x05\x04\xc0\xb9\xbfL\x062X\xfeG\xe3?\xddC\x1b\xad+\xf9\xb4\xbf\xea\x8dq\xbc\xe9\xfe\x9a?\x0b\x03M\x8fL\xd1\xc4?\xe3\xe0\x90\xab[`\xfe\xbe\xce\x86n\x04\xdb\x90\x8c?\xf6\x0b]\x0828\xcf\xbfJ\x9dk\xad<\xdf\xc9\xbf\xf7\xa4\xc9\xddq\xfc\xd3\xbf\xd5\x00\x8a\'\x86n\xae?\xe4\x06\xbb\xe2\x8c\x86\xd3\xbf\xd8$%\xdf\x83\x19\xe3\xbf\xd1V\x04\x8a\xf1\xb8\x92?\x8f\x8d\x88e\x1b,\xda?t\xaa\xd6\x08n\xe3\xdf\xbf\xc7\xc1\x9f\xfd\xceg\xc5?\xc9\x88/j\xa1\xc7\xc1\xbf\xa6\xc9\x00Jn\xfd\xc9?sm:w\xe1m\xdd\xbfn(\xfabr\xd7\xdf?G\xc5\xde\xf1!\xda\xcd\xbf\x1b\xeeSg\xa9\x98\xa9?\x8d|\x81k\xc0\x08\xd1\xbf\x83`\xcc\xc7\xe1\xb0\xcb\xbfXnR\xc9\xabF\xe2?\x9f\x14b\x97\xd9L\xc1\xbfe7\x95\xfd\xdc\xbc\x83?\x97\xd9aB\xdf!\xdd\xbfC\x0c<i\'X\xc7\xbfr\xe3f\xa1X\x12\xcc?|vO\x1d\td\xdb?\x9f\x81\xb6\xf8\x143\xe6?\x81\xc6\xf3!\xf6O\xba?i<\x90e\xc4\x8e\xe9\xbf\xcc\x0c\xb4\xeb/S\xe7?\x07_\xac\x99\t\xdb\xec?K\xd0b\x1b\xcf\xbf\xc4\xbf\xc5\x876\xf9\xfel\xe4?:\xb3\xb90\xf3\x80\xbe?iko\xa5\xe6\xfd\xdc\xbf\xff\xa0\x0e\xdc!\xac\xe1\xbf\xc63L\x97\xf8]\xc9?\x9d\x11\xed\x17\x11\xd2\xe2?\xe19PA&\xa7\xb0\xbf\xa4\xeb\x8aR\x8f\xe5\xc0\xbf!l<\xaa_\xb4\xc3\xbfg-~\xf2~Q\xbd?\xdf}\xba\xeb\x04\xe1\xdc?\xa5\xe5\xe2\\^\xc1\xc2?`v\xd4\x81\xbd\xa6\xe7?\xb0=\xab\xc4G\x11\x9b?\x8a\xe2g\xe1|\xd7\xb5?\xae\xe5\xc5by\xfb\xcb?\xd2zJ\x8b\xe9\xfb\xbc?\x17\r\x04YqD\xbc?0I`\xe5\xc9\xa9\xbd\xbf\xa9\x11\x0b\x1bK\xdc\xcc?\x8f\x9c5:M\x1a\xa4?\x9c\x0b<3\xd5$\xdb?\x84\x8e\xa4M\x9b\xde\xa7\xbf\x12\xffc\xd1\xc9\x06\xd3?O\xd5\xa5\x8c\xef-\xe0?\xe4\xbe\x88p\xbf\xd3\xb2?X\xc5\r\x02n\xda\xe1\xbf\xd4\xfegjh\x89\xb6\xbfO6\xfb6\x13I\xb4?g\x81\x95\xacE\xc0\xae\xbfU\x11\x93I\x94y\x90?6\xf9?\x9c\xf6\x80\xb3\xbfg\x88\xeaum4\xd2\xbf\x969b\xa6\xe0Q\xa0\xbf\x01p\xab\xa0\x07\r\xba\xbf\xa3\x19\xe8\xdf.F\xba?\xb4v\xd9\xb0G\xe5\xde\xbfK\x0c\xd7\xd2\x81;\xc0\xbf\xd7\xea\xe0\x82\xbfD\x8b?\x11@`\x012\xf5{\xbf\xb3\x13\xd5\x13\xe1\xcb\xab\xbfU(2\x02\xf6\xdem?\xbc)\xfdd\xbf\x85\xd7?'
p27
tp28
bag2
(g3
(I0
tp29
g5
tp30
Rp31
(I1
(I9
I128
tp32
g12
I00
S'\xcf\xbc\xfd\x03e\x82\xd1\xbf\xa1\x10\xf1Y\x86\xd4\xe6?\xbe\xb4\x15\x12\xf2\xb4\xab\xbfs\xe1,\xfb\x0fu\xdb\xbf\xf1\xc0\xb7\x81\xb3\xfb\xe7\xbf\xfb\x9b\xaf[L\x80\xd8?\x05\x9b\x80\xa4\xf8\xfc\xd1?R\xb7\xf4\t\\\xe5\xe1\xbf`\xe4\xc7\xde\x85\xd8\xed?\x01%C\xdd\xb2\x9a\xe2\xbf\xa6\x07\xed\x91\xd4\x94\xe2\xbf1\xa4\'4\x03\x8f\xbb?\x7f\x1c#M\xe3\xbd\xf1?\x9b\xa7\x86\xa1\xb19\xc7?H\xaf\xa6\xad\xd8 \xc0?v\x9c\xeeD\x8cD\xee?\x1aW\xa4|\xcd\x11\xe8\xbf\xcf\x0e\xdc\x17x\x86\xde?Z3\xd5\xc8*X\xef\xbf\x83\x12\x95\n\x1eB\xe3\xbf\x01\x00F\n\xb8\xc3\x97\xbf\xf7u\xf3\xd6\x1a\xb1\xee\xbf\x00\xa71\x17#\xed\xe3?\xcb\x95X\x80\x14\n\xe9\xbf\xeb\xe3\xca3v\x8b\xf1?\xfb\x99;ivs\xed\xbf?\xfe\x89\xfcm\xc0\xea\xbf\x0f\xadO\xb6\x8bR\xe3\xbf\xcb\xf1\x03\x01\xe73\xe9??\xd6\xf4\xb2\xb9H\xb3?\x86\xdf4gZx\xf2?]\xa2\xca+\x9e\x11\xf2\xbf\xb2\x0fz\x03Q\x80\xce\xbf2\x1c\xc1/GG\xf2?\x10\'=\xa4\xb0\xcb\xe6\xbf\x8b\xf5\xb8\xe0\x8dA\xde\xbf\x8c\xe8\xe3l\xb7\xd2\xd5?)\x07\x0b^\xa2\xb8\xdd?\xac\xab\x97\xc5+_\xb9?\xbe9\xdd\xc2ci\xe5?\x94d\xf6\xe9\xa8\xb3\xc9\xbf\xd7)Ig\x87\x85\xd3\xbf%<\x1f\xac\x80*\xe1\xbf\xa6y\xf1\x15wl\xc5\xbf\xaa\x18*\xb9\xd5\xb8\xe8?!\xe8\x12\x1c\xe4P\xdc\xbf\xdb\xdf\x8e\xc1\xe3>\xd0\xbf\xc8\xf6F\x94x<\xcd?\xcd\x1a{\x9bv\x81\xd8\xbf\x9cx\xc80\x13\xc2\xe9\xbfp\xb9m\xec\xc0\x98\xc9\xbf\xb5TJ\xa5@\'\xc3\xbf\nl\xf4\x1a`\x11\xbe?\xe9\x91m\xcf)\xa0\xe6\xbf\xdd\\qj\xc26\xe1\xbf7\xe2\x19\xb9\xa4\xbc\xe3\xbf9\xc7\xdb\xe5\x86\x9a\xf2\xbf5;H\x1f\xb9\x00\xc2\xbf$;\xec\x15\xf2\xd3\xc4\xbf\xa6BA\x02Ru\xe2\xbf\xe2X\xb5-l\t\xf3?.~n\x12\xd1\x0e\xe8?\xd9\xe8/\xc8\x17U\xea\xbf\x83\xc7q,\xa2\xdc\xe5\xbf$\xa4\xd6R*u\xc1\xbf\x19Go\rs[\xc3\xbf\xedb\xd8\xa9\x92\xd6\xf3\xbf,\xae\xc4\x10Q\x1f\xe6\xbfb\xb7\x8f=\xe4\x0b\xe7\xbf\x8d\x13 Z\t\xf9\xce\xbfBbm\x94H\xba\xd9\xbf\x8e\x08\xd5@\xe0\x0c\xe1?\xfd\xb0iI\xfdQ\xc9?\xcb$\x86\xb7\x1c\x8c\xc7\xbf\xd3\xddX6;\xec\xe5\xbf\x17"\x87\x0cN\xfa\xcc\xbf\xf6\xad\x90p\x14_\xb7?\xf2\xe65{\xe9\xfb\xe7\xbf\xce]\xf8B?Z\xcc\xbf\x15\x1e\xd3\xe7\xdd\xdd\xb3\xbfJ\xfcx\x90Dj\xe8\xbf\x89\x8f\xd0\xef\x1dR\xd3\xbf\xe1}\xa6\xd6Y\xa1\xc3?\xac \xfdW!;\xe0\xbfi"=\xb9\xfc\xc3\xa2\xbf\xedd\xc3\xeeh\x1d\xda\xbfm\x86\xcdE\xee|\xc5\xbf\xa2\xcb\xe7\xf6\x10h\xa7?\x98U{\xf6{\xc9\xdc\xbf7,\xff\xa5\x89\x19\xe5\xbf\x1f\xd7\x92B\x14\x84\xd4?\xc7\xf3>?\x0e\x11t\xbfG\xee5\xed\xa4\xf7\xe5?5\xe4\xc3\x0e\xe6M\xe9\xbf\x12}\xf6\xddv\x84\xe0?j\xf9\xd8\x9d\x12\x82q?\xd8\xe62\x8cS\xfb\xd4\xbf\x85\xf1s %\x0f\xcd\xbf\xe1)\x93_s\xab\xa0\xbf`\xc5`\xae\x83\x98\xe0\xbf\x08i\x11{\x10\xff\xdf?\xedP\xa9h\x97l\xc8?\xf0C\xf4\x1cR\x9a\xd1?\xd2\x11\xec&\xd4V\xf4\xbf\xa6\xbf8\xd2v\r\xd8?)\xb5;\xd9\x0eK\xe3\xbf\xf1R.\xc9\x91%\xac\xbfB\xaf\xdf\x01D\x10\xb1?|&E\x98\xbc1\xd9?\xda\xb8Y\xcao\x16\xeb\xbf>\x8a\x97\xb2\x08+\xf0?w\xf6\x9e\xe6\t\xbe\xe4\xbf\xa42\xf1;D\xb7\xbc\xbf\xcd0^\xa4P;\xb1\xbf\xfbG?*U\xee\xd7\xbf\xbe\xdf\x9c\x81/\x89\xe7\xbfl\x90sp\t\xf3\xe2?\x9f\x98\xb9\xc1\xa3>\xe3?T\xe9\xed\xef\n\x01\xc3\xbf\xe4\xf6/l\xc2\xb6\xe3?q\x1a\xfe\xec\xa1\xcc\xe6?sn\xbc\xec7P\xcf\xbf\x8eq\x83\x8e\xe6%\xe8\xbf\x00\xfe\xe4\x02\x1c$\x9d?~\xe0]/ob\xd8\xbf"\xf6B\xe3\xc0\xc3\xe5\xbfe\xe55d`\xa3\xdb?i\xa0\x81\xf3\xe8\x19\xe3?\x046{\xb4:Q\xc5\xbf\xebd\xc5\xdaJ\xbe\xef?7\xbcg\xd0\x91\x1f\xf0?Z\x82\x0e\r\xe8r\xdc?\xbd\x80\xc8@.\x81\xf2\xbf4\xdb8\x98\xe4\x11\xdc\xbf\x9e\xdd\xe0\xc8\xa0\x1e\xe9?w\x04v\xbc\x8d\xc0\xea\xbf\xb2S\x0c\x90\xa1\xd0\xe1?l@\x87\x1bP6\xd8?\xd7!\xab\x18\xad\xad\xbb?\x1c\xb9\x91#\xa7\xe4\xe2?\x1e\xedW\x93,\xae\xd5?\xca\xa6\x16o\x9a\x18\xee?\x05\x9e\x08H\xed\xef\xcc\xbf\x1e\t\xab0>4\xe3?\n;X|\x8e]\xb4?\x8f\xf8[\xaa\xfdT\xe1?Mt\x9a%|o\xe8\xbf}C\xcd\x08.\x84\xb9\xbf\xac\x8e.\x0fLG\xe4?\x97\nJ\x05\xb9N\xe9\xbfL\xfd4(\x97\xd3\xe4?\xb2\xae\xee\xcb\x01\x0f\xd8\xbf\xd7\xa4\xd1d\x0f\xc6\xf3?\xacV\xe5\x1aFJ\xe9\xbf\xe0\x91?\x80\xf0\'\xe8\xbf\x89\xf2<\x97\xdf\xd1\xd7\xbf.\x9c#8cO\xec?0\xcf\xde\xeb}O\xcc?\xd4\x03U\x82\xa9\x1d\xf4?:\xcdu\xb3\xb5\xc9\xe1\xbf@\x1b\x8c\xbe\xc0<\xb7?\xd9\xe6HM\x9bZ\xe4?\xf6\xca\xbb\x05S}\xe5\xbf>\x93\x18gg\xa7\xd1?\xf0\x98\xc1\xf5Mh\xd7\xbf4T\xd9t$V\xf0?#\x94\xd2$_\xea\xdc?\xd4,M\x13\xc2\xd1\xed?_O\xa8\xb4D8\xca?@\x93[n\xf5\x00\xe6?\xd4\xf6\t\xbaFX\xe5\xbf\xa5:\xc3k\xee\xaa\xc0?\x9f\xa2\xa24\x12\xa3\xed?&\xfd\xc9\x00\xb5j\xf1\xbfH\xe1\xc3?\xa4\xb4\x9b\xbfG\x8d0\xc5\xda\x85\x8f\xbf/\xe2\xfa\\\xc54\xcc?\xbe\x9fVkK-\xe9\xbfv\xa8\xcc\xa2\xd9\xc0\xc4?C\x12\xd7\x8e[\xe7\xee?\xaaS\x91\xd3.\xa0\xe2\xbf\xdcO\x91\x98\xdc\xb7\xe6\xbfn\x98[f9-\xe3\xbfB\x88\xcd\x88\xa0\xb1\xd9\xbf\xe8b>\x18\x06\xcb\xe5\xbf\xb4V#\x8d\x883\xc6?\xd7\x9d\x0e1\xef`\xdc\xbfz\xa2\x90u\xa6\x8e\xd3\xbfN\xb1\x14S.\xe7\xc4?\xd4\x82[\xcd\xe1M\xd9?\x91\'q\xf2\x14Q\xd0?.n\xaf\x15;\x96\xdf\xbf3\x86\xc9\xec\x1e,\xc2\xbf\xbegg\x897\x14\x89?\x96bt\x0f0s\xf1\xbf\xc0\xbd\xc9$>\xb1\xbb?\xd30\xf8\x02\xdb}\xe8\xbf\x0bJ\xef\xbe\x19\xc6\xc5\xbf\xce\xa6O\xd0\r.\xd9\xbf\x1f\x01UFV\x96\xd3\xbf\x1b\x18\xf8o0H\xc9\xbf\xb0\x81@\xf4\x1a\xe5\xc5\xbf\xf4T\x93\x13\x0f\xcd\xd5\xbf\x19\x90\x17\xf0\x95\xe5\xdd\xbf\xb0$W\xe6\xb2\xc7\xa3\xbfX\xd2\x10\x07bW\xf0\xbf\xf06Y\xa4\xf3\xea\xc9?\x08\xb6\x8b\xa3\xe5\xa8\xc0\xbf\x1e\x90\x02\xddU\x1d\xe5\xbf\x04\xaf#\xc2[\x8f\xe3\xbf\xeb\x9c\xb8Y\\\x7f\xb7?\x02\xc6\xbc\x1f\xe9\xcc\xd8\xbfXQ\xc3\xe7}g\xd3\xbf\x92\x94\xf5\xbb\x0b\x85\xc1\xbf\xeb\x0e[\x8dvR\x99\xbf\x87\x19X\x8eMW\xf1?\x8a;\xb0\xfd\x1eL\x97?\xdd\x8e\x86\xc0\x90\x1c\xdb?\xe7\xd6\x1b\x97E\xd3\xe8?U\xf5\x1a}\xd1\x10\xe1\xbf\xd5Z\xa3\xcdp \xf7?\x99e\x9a9\x83\xd9\xc3\xbf&\x8b\xaeB\xb8y\xeb?\xb9\xb8\xe6kC\x83\xb9\xbf\x1aW=wQR\xe6\xbf\x98\xb9\xf2x\xa6d\x9c\xbf\xf1\x9a\xf5y\x86\x06\xe0?\xac\xf7\xd0\xb0\xbf\x87\xda?\xbc\xd1\x96\x86\xee\xf4\xeb?j\xbc\xb6\x1a\xc3K\xe7\xbf\xd8\x13 \xbeq\xac\xd2?n\nD\x99\x08B\xd2\xbfCSMd*\xc9\xe8?\x8ch\xe0\xdb\t\x8b\xe8\xbf\xb1\x85\x92\x85\xd8\x93\xbf\xbf\xa9\t\xd6\xaa\xb4\x92\xe4?\xefm\x8a\x93\xea\xac\xb1?\xde\xa3Ffr\xd5\xdf?\x9cC\xd7\xe5\xa9\xa7\xf5?\xfa\x87\x87\x1fW%\xce\xbf\xe8\xe25\xb6\xdc\x06\xb5?\xee\xf2R\xbdu\'\xf1?h\xbbT\xa0f\x91\xd5\xbf\x9e\t\xf9\xa9\x83\xdd\xc5\xbf\xec\xd5|AD?\xea?\xaa\xce7\xb3\x85\xf1\xe4?\x99\x97:\x89\xb8\xca\xe1?~\xd1L8\x7fr\xe7?K\x1e\xa03}\xd7\xc9?\xecf\xa3\xc1\xeal\xf0?\xa1\xe0z\xeb\x80\x04\xe6\xbf\xb9\xfa9\xb5v\xe0\xe9?Q%\xf1l\x14\xeb\xd6\xbfZ\x15\xcf\xce\x92n\xc7\xbfqc9\xd2\x08\xe4\xbd?\x9d\xf0\xec\xcc\xee;\xe8?%K\xb7\x1f:\xdf\xdb\xbf\xca\xbe\x17\xb4\x1e\xd4\xde?\x9b\xee\xd4s\xf1v\xf5?\x8a\x18\x16v\xdf\xb9\xe4?&\x8b\xe3\xab^0\xee\xbf\xc9\xe5\xc8\xb9(\xa1\xe5\xbf\xe9\xce\xb6h,E\xec?\xc2%W\xdf\xa7\x87\xe2\xbf\x04\x0c\x9cC\xb5^\xd5\xbf\xf9xjP\x0c{\xec?\xe3\x1e\xf4uw\x9a\xf0?\x17_\x16\xbbvI\xc7?fR\xbc<\x0f\xd6\xe2\xbf\x00\\\xe1\x9a\xce/\xe0?\xb0~\xd2\xe0/}\xe1\xbf\xb0\xc2&\x8d>\x84\xd6\xbf**\xa6\x8dB\xd4\xf0?\xf7j\xf1\x1a(\xce\xbe\xbf\xbd\xc6Y\xb7\xea\xb0\x9d\xbf\x96\t\xc7\xf2G\xca\xb8\xbf\x12\xda\tdm\xef\xd0?*\x9e\xfe\xf1I\x10\xdc\xbf`\xa8\x03\x14x\xeb\xcc?N+\xf0\x93\r\xa7\xb0?\xeazz\x07^\x08\xdf?\xe9+>d\xd1\x98\xc2\xbf\t\x02\x97?{,\xec\xbf\x8a\xc1F\xdd\xb1\xd4\xd5\xbf3\x0e\xea\x18Q\x87t?\xb2\xdb\x1f\x9dgk\xdc\xbf\xd5eB&\x88\xb8\xe5?P\xfa\xaa\xd3\xd4\x9b\xcb\xbf\x96\xf8!Z\x8d\xe7\xa5?*\xd4I\x8c\xda`\xd3\xbfA\xb5\xa0B\xcd\xaf\xc1?\x07\xc8\x9eB\xd7\xd9\xe4?*\xe1<\xae\x88\xd6\xed\xbf\xb1]\xa1\xd9o\x85\xe3?~\xb92|Q*\xea?t4A\xc14\x0f\xe1?\x9e\xd6*\xa98\xc7\xe3?\x92\x85\x7f\xe9\r\xb7\xe8?\xf5!~h\xa6\x12\xe7\xbf)S\x9b\t\x15\xcd\xd2?\xe4\xb7jf5\x19\xd2?-\xacuByq\xe9\xbf\xd4\xf6\x97\x93rA\xbd?\xa7[\x00\xe2p\xd4\xd6\xbf\xde\xcd\xa9B\xa5q\xd0?Ha[\x1a[\xb7\xe5\xbf/\x9e\xe25\'0\xc9?\xa8\x97\x85\x05U\xb4\xf2?\xe6\xdf\xffb\xe8q\xf2\xbf4\x13\xb9\xfa\xa9\xe4\xdf\xbf\xb1\xa5\xfa\x9b\x0b\xcc\xe5\xbfc\xa3rN\xd0\x9d\xda\xbf\x8d\xde12\xb2\xea\xb5?\xbaa\x14\xfd\xd7\x07\xc4?\xffa<\t\xc5\xcb\xe5\xbfwO1\x12\xbf\x97\xe6\xbf\t\x00\xf7.\xf5(\xe5\xbf\xfe\xe1\xfcg\xa8\xd2\xdc\xbfS\x80C\x8d\x85\x9f\xe5?\xb8\xf1Pk9\x08\xc3\xbfq"\r\xc0\xd1\xd2\xdb\xbfSO\xe8\xad\x84\xa7\xa9?v\xe3\xad\xa8p\x0b\xd7\xbfLe9\xf7\xce\x04\xe1?\x1b\xba\x12\x8b\xa0\xec\xe9\xbf\x91\x856\xfe=\xc7\xd0\xbf\xf2gC\xcc\x8a\x15\xda\xbf\x81B\x02cQ\xc1\xe1\xbf\x99\x94\\p\xa9I\xec\xbf\xc2\xba\x0fe\xcb\x00\xc7\xbf#\xad&A\x80\xb1\xe3?p.\x8b\xd6\x86\xf0\xdf\xbf\xc6\xc7\x17\x8d\x10\x89\xb7?x\xf27\xda__\xd8\xbf_\xd2\xd1\x1b8N\xd5?zE\xf8vd\xe0\xd7\xbfx[\x00a\xb1\xc8\xe7\xbf\xdb\x82\x9b}vg\xe9\xbf\xdb$\xc3\x90\xa8%\xcf\xbf\xc6lzpP7\xe8\xbf\xbdb\xb4O\xf8\xd9\xe7\xbf\x94\xb6\xfd\xc7\xc3\t\xcb\xbf\xd4\xa5\x81I[`\xce?ep9\xe4\x06g\xf2?\xcf\xe2\xf5\x0c\xd86\xe9?\x19\xa0\x9dW\xa8\xaa\xe9?\x14[J\x9eO%\xee?@ul-f\x8c\xf2\xbf460\xf1\x8c\xcb\xeb?\xf0r\xe7\x1e\x8a\xf3\xea?i\xa0\xb7\x1a\xdc\'\xe5?\xb5G\x04\x07\x9f*\xa5\xbf\xc23\xa6\xa5;\x9b\xde\xbfG\xf5l\xf3qD\xcf?\xe3D\xb0\x94\xd9\xe0\xd3?\xa3\xa9\x0e\r\xc9J\xf1?o\xfas\x84\xe6r\xdd?\xc0F\xe6=Wl\xe8\xbf\xa6\xe1\n\x9d\xdb\n\xd1?|[\x94mXG\xc9?$\xa8E\xcb\x88\x01\xe3?+\xc1\xa9W\xe3\'\xe3\xbf,\xab\x8b\x13E\x8f\xca\xbf\x8d\xac\x9f5\x83\xe1\xd7?\xa9\x07\xe0=\xcbW\xe3\xbfzj\x8c\x84p\x8b\xf2?N\xdc\x8c\x84\xf4\xeb\xd9?(\x8e\xaa\xc0`\x8a\xa9?>~\n\xaa\x92=}?\xeeB;L\xb5K\xf4?+$\'\xc5R\x10\xd0\xbfx2\x01\xbd\xb8\x91\xdd?\xd1\x875%\xedv\xd1?\x07\x95\xf7e\x98\x87\xd0?G\xedG\xd6\x9bP\xed?\r\x1c\xef\x95X>\xd2?\x912\xc5"vG\xdd\xbfU\x16W\x9c\xa4\'\xf6?Yz\xc4\xca\xcc\xb6\xe3\xbf`\x87\xd5J\x9f\xf0\xec?\x00\xb0\xd2\xdd\xee\xbd\xc8\xbfb\xe7=$j\x91\x92\xbf\xb1\xa2D\xca\xf3\xe2\xe1\xbfI\x03\xae\x95\xca\xca\xd3?\x994\xfaC\x92\x8a\xb4\xbf\x90\x02|\xeb]X\x9e\xbf\xa7\xa8\x13\x03\xffs\xf1?\xb0\x02z\x84G?\xf1?x\xff\xf53Q\xce\xc4\xbfUF@I\xec\x00\xde\xbf\xc0Gg\x10\xfbf\xe3?Z@h+\x1e\x9c\xee\xbfI\x1b\x9a6\x1c\xaf\xec\xbf\xde\x00\xe4\xd5\x02\xb8\xf4?>|\xc6\x175\x0e\xf7?\x1b\xbb\xba_#C\xcd\xbfJI&\xca\xf8\x1c\xda\xbf\x13\xc1J\xd5;\xbd\xba?\\\xb7\x19D\x10\n\xe4\xbf4\xad-l\xbc\xff\xe6\xbf\xd5\xb5\xa6&\xc9z\xf8?\xd0\rZ\xfc\xf6L\xe7\xbf\x00KUG+\xc2\xee?k%\x10\xde\x8f\xb6\xde\xbfSzC@\n(\xd0?38\x8a"\xc9\xde\xd1?D\x16?\xb9\xc9\t\xc3\xbf\r\x07\xd0\xd5\xab\xa5\xd0?\xe2\xa4\x051\xb1\x8f\xd1\xbf\x08\x1bA8\xb4\x1a\xec?\x935\x12\xc1\xc0\xdc\xe0\xbfr\x90\xc5n\xb3n\xcc?lHg\x80\xfbj\xd3\xbf\xad%\xfe\xb6\x88R\xea\xbf\xb9&\x83\x12^[\x85?\t\xa8\xd0\x95\x15y\xdf?\xcb\xec\xcf\xc6j\x0f\xc6\xbf\x07\x16gy\xa5\xbf\xed\xbf\x91\x8d\x97}t\x9e\xf3?\xc0\xce\xa3\xac\x12d\xed?\xff\xe86]\xff\xdc\xf0\xbfY\x1f/\xff\x9c0\xaf\xbfD\xba=\xd3\xe8\xf1\xe1?\xdd\xf5*\x066\xc8\xbc?#\x989\x0c\xd4v\xf1?#\x8a\xd97P\xdb\xe3?-qf\x88\xc8>\xe6\xbf\x8e\xfd\x10\x90\x95\xee\xca?\x86\xd29j\xc5-\xe5\xbfY3rA\x1a|\xc0\xbf\xa2\xc4\xccFo6\xd3?\x98?\xbd\x0frD\x94?bh\xd4\x07{\xaa\xdf?4\x8aBo\x8a~\xd0\xbfW\xc9\x90\xe2\xd9\x06\xb3\xbf\xe93\x1eJ\xef\x03\xf2?#\x1cX\xd5\xe3,\xef\xbf\x06\xf5\xf6\x88}\xb9\xd4?\xe1\xca\xad\x12\xb7\x9f\xe6\xbf}\xfd\xf6U\x0f\xf4\xd0?\xc7\xc9\nZ^\xa4\xf0?$`\x8f\xf9T\x17\xbd\xbfSN\'\xb6\xe3\x88\xd5\xbf\x86\xfdv\x98\t\xc8\xee\xbf\xd3]\xf6\xd3f\xea\xe3\xbf5GM]\x16\x06\xee\xbf\x03\'/\xad\x1f7\xf3?N\xa2m\xd0\x97Y\xc5?\xd9\xe0\x16\xd5\t\xa8\xde\xbf\x8ef%\xc4\xb3\xf8\xc4\xbfj\x11\xe9@\x9e\xb3\xd8?\xbe\x14&\x00\x8a\xb0\xf0?(.,U\x89\x86\xe8\xbf\xd4\xf9\xb5;\xcd\xe6\xbe?\xab\xdb\x13\xef\xc2O\xb0?4f\xd9F\xb2\xc4\xd0\xbf\x90\x1e+\x17rv\xf0\xbf\x8e]W\xddiO\xc4\xbf\xd4\xef\xbd\x146\x99\xf7?\xff\xbf\xd1~\rD\xc3?c\x089`\x06\xcd\xc9\xbf\x91\x10R\x80\x88|\xc4??\x06\xe4\xf13\x9e\xde?\xff\xa4\xdc\xd6!s\xc8\xbfjI\xa1\xf2J\xc5\xc9?\x8c]\x94\x07L\x93\xe8\xbff\xd2\x89\x04\xb4n\xe1\xbf\xd7\x9fY\x14\x11\xb0\xdc\xbfR\x89\x07\xd9\xfd\xe2\xeb\xbf\xdf\xbc\xee\xd06\x11\xca?C\xa5i\x97\xb5\x84\xc9?\x0e\xdc|%\xa1\x83\xef?\xe2$\x80\xa1\xb7!\xf0?\xe3\xdcgi\n\x95\xf2?\x8a\x19\\\xae\x89\xb8\xe0?\xe6\xb2\x9flL2\xe7\xbf\xec68\xf6f~z?y\x89I=l;\xf8?\xdc\xd3\xf0*4P\xe3?0J\t_\x07\x9d\xc4?s\xe0\x95\xf8\xac\x8d\xd3\xbf-\xcc\xe8\xc9\xb1\xb9\xd0?\x93\xc9\xf9\xf8\xe1Y\xc4?\r]f\xc8\x02_\xf7?\xa7\xb0Y\xe9kvw\xbf\x0eQ\x87\x8d\xd0\xa8\xe4\xbf\'\x92\xa1\x03\xddR\xcb\xbfEp\x8d no\xea?\xcbv8h\xee5\xd3?\x90\x0f\\me\x8d\xec\xbf\xb9\xe4q\xce\x1f1\xd2?\xc5\xcb\x99;)f\xc3?\x86\xeeu\xfbm8\xd1\xbf\x87\xeb\xe3^s-\xf5?Ik\x9c\x90\x93\xf7\xdd\xbf\xd3\xe8\xba\xc2p\xf9\xdc?\xca\x95\xf4\x1c-\x91\xcf?l\xd4\x8b\xd2\xd5w\xf0?i5\xce\x9a\xee\xed\xdc?*7\xd9\xf4Iq\xe2?\x05bK\xbe]\xdc\xd2\xbf.\x95\x1d\xcaQF\xd0\xbf\xcfg\xf5\xac#\x80\xe7?\xe9\xfa@<\xb3O\xd0\xbf\xdc(\xabp\xf2t\xee\xbf\xb7ln\xa1\xb0\xa5\xee?>\x92]\x9c\x17\xc1\xd3?\x89x\xa9\xdd\x07\xb8\xf2?;\x9e\xb5\x8cA\xac\x8f?\r?\x04\x83\xf7C\xb8?\x03\xcc\x11\x88\x9c(\xf2\xbfd\xa7\xe6dg+\xbb\xbfVeM%\x1f(\xd0\xbfk\x9a\xde$Gq\xea\xbfS\x9d=<\x88\xe2\xce\xbf\n\xabl\x98>s\xe6?}\x1f\xb9,!3\xd7?\xf8\x01\x85&\'\xce\xe5\xbf\xaf\x9d\x8fNW\xf7\x95\xbf\xbd\xc6\xbc\x0c\xff\xdc\xdc\xbf\xaa\x93\x1c\xec\x83%\xea\xbf\x06*Mu\xeb;\xe6?\xec\xd9;\xf0\x8d\x8f\xda?O\xae\xa6t\xd2\x89\xe2\xbf?\x8aO\xc5\xefU\xdd\xbf\xd8j\xb19P\xb1\xd9\xbf<\xa7\x8e\xc4\xdaj\xe1\xbf\x97\x96\xff\xf6\x96\xf5\xe8\xbfx\xe7=\x87(F\xe4?\x8e,\r*\xed\xce\xed\xbf \xd4\xb6\r\xa38\xf2?\x1cd4\x080\xd1\xdb\xbf\\\xad\xa3Zq\x9e\xdc\xbf\xb1\xef^\xc6;\x86\xe8?\x98\x1c\xb3\xd9\xd5\xe9\xe5\xbf\xc3x7\xb4x\x01\xd1?=\xb2I\xf7\xe4\xc6\xe4\xbfBU=K\xa63\xf2?\xb8\x95\xfddE\xe6\xda?\xa2?\x04g$\x9a\xed?\xb6\xbap\xb6\x16\x9e\xdb\xbf{\xfc\xce\xf9{V\xde\xbf\x90\x14\xf9\xd5\xf9\xf1\xec\xbf\x02(\x97\xf1\xfeb\xea?\xc2\xcf\xc1\xe4\xae\x0f\xcc\xbf\xcd"\x80\xfa\x88@\xf3\xbf\x92|{\x19\xfa\x0e\xf6?\xb0\xd2\xec-\xc1\x14\xe1?\xdd\xa3\x88\xa3+\xee\xe5\xbf\xb5{D\xf2\xb0\xda\xe1\xbf\xdbb\x1d\xf1g-\xa5\xbf\x0fO\xe6\xb1\x95]\xed\xbf\x95\xb9\xeb\x8f\xc7\xd1\xe7?\x1b\xb1\xb8\x90\x17.\xd0\xbf\x87 \x0e\xf8\xb9\xf5\xe4\xbfp\xcbs"\xa0\xd9\xc1\xbfU\x0edv"C\xf2\xbf\x9bp?f\x1c\n\xd0?\xf1a\x12\xa0Q\x1f\xdb?\xc4\x15\x1cRK\x10\xa9?\xa2i@U~J\xb3\xbf\xb8dK<\x1d\x8d\xd3?\xcb\x1d\xbf\xc4\x0fW\x86?(\xaax\'\xd5\x18\xb7?\xb6.\xbc\xcc\xbft\xce\xbfZ\xdfv\xff\x04\x94\xed?\xe1\x9bF\\\\\x07\xe4\xbf\x11\xe7\xd9hI\x8c\xed?\xd0\xfe\'\xd3\xc9\x0f\xf4?E\xdb\x91\xc3\xdcY\xd0\xbf\xc2e\xe6\x9b\xb1\xb4\xc0?\xc7\x9fH\xea\xd2\'\xc4?\xf8\xfd\x8a\xa8\x06\xd1\xe5\xbf\xd8\xdc\xa6f\xe2\xac\xea\xbf\x8a\xe4\x95\xbbV6\xe8?1\xdc\x9bc\xb5n\xcb?\xca\x0f\xfa\x85\x818\xd6\xbf\x16\xc0\xc1\xf1\xc5\xde\x96?\xa0\x85OZG\x04\xe5?\xf8X\x7fG\x0e\xc1\xe8?g\xf6x\x84#\xfa\xc6\xbf\xa6\x96\xc6\xedc\xee\xc3?\xfc\xe02\x13x\x99\xc2?\xa0\xe8\x9a\x0eVM\xc4\xbf;\x8c0q\t\x1f\xdc\xbf\x1e\xbbZ\xa0\x92\xf4\xc7?\xe4A\x96w\xc5\xb7\xf0?\x81\xfb\xdff\x0eF\xd8?\xf1v,+5W\x84?\xd7pt\x08\x1c\x86\xe0?\x11\xa8\xcc;Z\xc6\xc2\xbf\x94\xc8\xa2\xb1\xee\x05\x81?\x7f\x9c\xea]O\x08\xf3?\xa8\x83Up\x00\xc8\xe3\xbf\xfb\xfe\xe3\r\xbc]\xd2\xbf*\xc5\x7fz&*\xe9?\x055\x1c\xf3tn\xe3\xbf\xe8\xfd\x86\xaaJ\xb5\x91\xbf\xe1t\x101\xf8V\xa3\xbf\xae\xbf1\x99\x9e\xb0\xb3\xbfa)\xd4l-\xc9\xd1?$\x85\xfb\x1a\xad\xc2\xe5?/w\xd5\xbc7\xbd\x86\xbf\xebi\xe6K}&\xc6\xbfn3\x8e\x02\r#\xeb\xbfom\x94k9\xb9\xec?k\xc0\x85\xdf\x18\xd8\xc8\xbf\xe6\x9c\xa5\x0es\x81\xc6?~\xd1\xf3\x86)\x9d\xe9\xbfU\xe0a\xae\x82\xa9\xb8?d\xf9\xc1\x13>\x89\xd3\xbf\xd3@\r\xa6\x99\xe3\xe1?K\x85r\x0cH\t\xd9\xbf(\x9a\xcc>P\x85\xe6\xbfeU\xd5\xb1K{\xea\xbf\x81\xf4\xde\xcf\xf3\xde\xe5?\xfct\x0fQQt\xc0\xbfc\xd6\x81\x9di\xf4\xe0\xbf\xd8\xc8\xee\x02\x91s\xc0?\x88\xf0\x18n\xf1\x15\xd7\xbf\nX\xf6\x0e\xeb,\xcc\xbf\xbe\xff\n\x94\xcdm\xcf?\xc3U\x86<Q\x9b\xec\xbf\xde\xc9\xf9lW\x9d\xde?\xb5\xb63\xb7\xc5\xe0\xd1\xbf\x13\x95\xeb\xaf\xcd\xcc\xd6\xbf\x1d{\r\t\xef\xc3\xec?\x179R:\x85\xc7\xd2?u^\x87\x17\xb2\xc4\xf5\xbfz\x84P\x87\xdb\xc5\xf2\xbf\xcbRv\xe3\x04\xbd\xd4?\x0e4\xa3\x0f\xbd\x88\xf2\xbfgXgW\x1e\x05\xf1\xbf\xe9\xc1\x13m\x12\xfd\xca\xbf\x97q4%b\x1c\xf1?p\xbf\xc7\x11\xf6f\xd6?\xa0\xbaji\xa8\xfa\xd0?\x887\x89M\xc0D\xdc?\x9e!\x9a>*\xee\xee\xbf\x0f\x7f\x10L+\xc8\xf0\xbf\x80\x80\xaaJ\xc5\xd2\xda?\xf2(\xee\xfb3_\xf1\xbf(\xd1\x0b\xa8\xf4\x94\xe9\xbf\x9c\xd99\x9a@L\xb8?\xef\xaa\xba\xcd\xf5\x1b\xed?2\xcf\xea\r`\xb3\xe6\xbf\xbe/A\x14h\x08\xea\xbfN\xf5\x0e\x18Q.\xe0?J\xfb|\x94=Z\xef\xbf!,E^\xc5\xc4\xbe\xbf\xbf>\xbd\x0c\x00\xea\xdc\xbf\x12p\xdb\xa7Y\x05\xe2\xbf\xe6\xc2C.j\x84\xe1\xbfX\x89@\xce<r\xe7\xbfYC\xf6y`\x97\xd7\xbf4\xce\xcd29\t\xe8\xbf\x15,K\xb2\x19\x95\xde\xbfl\x1c\xac[K\x91\xea\xbf\x16 a|\xd0B\xef? \x9c2\xdb\xeb\xe8\xd0?\xfb\xa2\xd4\x82nU\xd1\xbfHRG\x92\xc2\xc3\xe6?\xcb\x95\x02\xe3us\xe2\xbf\x1c\x00r\x03\xfcO\xe1?,\xa2<b\xd5~\xe8\xbf\xe7\x94\xab!\x80\x90\xf0?\x9b_\xd19r|\xf2?J,\x16\xa9O+\xd8?\x00\x81j7D\xeb\xe3\xbf\x18*\xde\xa5q>u\xbf\x93h\xfdt\x95\xe2\xf1\xbf\xf9e\xcc\xff\xdc\xd4\xec?\x8e\xcc`\xd4\x8a\xa0\xcb?\x1fFD4\x97\xe3\xe8\xbf-\xa3\x1f\x05\x1b\x04\xe0?o\xb5\xf2\xa4\xa6V\xbb?r\xa6ws^\x8a\xbe?,e*\x94\x02r\xe1\xbfk\x9b0\xc0\xc3\x98\xda\xbfTa\xad\xdf9\xbe\xf3\xbf\xa9\x9f\xa0\x9a\x02\x08~?\xd9\x94Rp\x95\xc1\xda\xbf\x07\xce4\xaa\x0eT\xa9?\x8d!\x1b?X\x10~?o\xe3\x81\xbc91\xf1\xbf\xb1\x0e \x1dGt\xe6?\x88\x02\xa3\x82<]\xd5\xbfWcL\x1a\x9eV\xc6\xbf\xdf\x8c=\xf7\xech\xc9?B\x00\xad\xfb\xf9T\xe3?p+\xc2?\xdc\x9f\xc8\xbf\xda\xbd\x15\x15\xbe\xce\xe8\xbf\x12.\xbd\xc6\t\xf5\xd2?n,%x\xf8w\xe8?Fvw\xbd\xa6L\xe0?\x14\x88\x17 \xa3F\xe5?\x8a1\xb2\x8f\xfe}\xed?\x9bW\x91\xd8D\xf9\xa7\xbf\xdch\x02+\x8a\x9d\xd9?\xdaG\xc2\xea\xa5\xb1\xf2?*\xb2\xd0\x00\xcbD\xe6\xbf\xc8\xac\xc6\x15R~\xed\xbf2\xd7?\xe2/\xc8\xbc?\x07b\xc82\x92\xff\xe0?\xd4\xa7A\xd8\xe5\xf5\x98?.r\x8bc\xc4"\xc6\xbf^58\x9b\x053\xeb?\xe0\xe3\x1fe\xf2\xe1\xdb?(\x01mlLJ\xec?\xd1\xde\x0buu\xbe\xa1\xbf:\x14\xda\xfa*\x87\xda?\xd3\xf4e\xe4\xc0\xe7\xd5?\xc4`\x18B\xd2\xfb\xc6?\xfa\x88\x8b\x0f4\'\xba\xbf\xfeI\xe4y|\x81\xd0\xbf\x8e\x89\xa8\xa0\x0b,\xc9?\x08\x8ew\x1a?6\x82?3\xf5\xae\x0e\xbe\xdd\xdc?\x00g2\x01D:\xb6?)\x8ba\xcf\xa3}\xce\xbf\xcd\x98O]\xe1\xa9\xf3?oWC\xdc\x05\x82\x84\xbf\xc3\x8fU^\xa4\xfa\x82\xbf\x1b:\xb5\xea\x10\x89\xf1? \xaa\x96&\xe7\xec\xd1?+\x0b\xa4\xfe\xc8\x16\xdb?fM\x8cT\xa9\x9aP\xbf\x9fj\xbb-\xd1S\xeb\xbfj=\x83\xfbG\xbc\xd0\xbf,n\xa7\xad"\x9b\xc9?)\x8d\x07\x00I\x8d\xe8\xbf\x0f\xf0\x0fr\xffC\xdf?_b \xa2"\xf4\xe1\xbf\xd8\xd2\x16MJ \xcb\xbfT\xa4\xa4\xb3\x82h\xea\xbf\xb2\xd6,\x9a\xa9\xf5\xcc\xbf\xdb\x0b\x8b\xfb\x1f\x14\xd0\xbf\x9c\xc4\xddm2d\xb4\xbf\xafS(\x94{\xa7\xcd\xbf3]~\xbd\xcf\xb4\xe4\xbf\x10\x8fB\xf7\xe5\xed\xe9\xbf\xb0ipQ9\x8d\xdf\xbf)\xfdV\xbfW\xf6\xda\xbf2\xe5:\x1fn\xc1\xe5?o-\xea\xd97\xf4\xdc\xbf]\xc6\xf0\xa9\x7f\xe5\xe0?\x95\xcfQaP3d?\x0e\xb4\xad\xc6\x15~\xca\xbf\xb9\xabp;\x88;\xd3\xbf\x13\x91\x19{\xc3\x90\xe8\xbf\x04\xb8\xdc\x151\xad\xe4\xbf\x17\xd6\xbf\xb7\xb1\x9b\xe1?1V\xe3|Jy\xcd?g\'\x01.\xb5\x81\xe8\xbfiR.\xfa\xc0h\xdb?\\\x84\xb3\x86\th\xd1?\xc6<_cL\xe6\xf0\xbf\x80,\xd3h\x00\x9e\xf0\xbfB\xb8\x98s\xc0\xc7\xd5\xbf:\xf3>g\xe8C\xf3\xbf]|\x0e\xa7\xd3.\xe1\xbf9\x8b\xb6mZ&\xe8\xbf&\x13\x16\xf3\x12\x1c\xf0?\x95d5P\x1d_\xd6\xbf!\x1b4p\x85\x06\x8f?\xdd\xa9\xffQA\x12\xdc?\xcd\x1f\xf3\xfc\x153\xbd\xbf/*\xe5\x1f\xc5y\xf1\xbf2\xd7\xe9I\xd0\xbd\xd1?\xd0\xb0\x80C\x94\xb2\xe6\xbf\xddn\x11\x9fHB\xea\xbfu\x17\xe8\x91\x00\xd9\xe2\xbf\x1a\xff_4\x80\xd6\xe9?\xe6\xe1\x0eS\x0e3\xca?\xdb\x9d~>\xbd\xed\xf0\xbf\xc4R\x8fiN\x16\xef?\x82\x94\xd0\x8a\xe30\xd6\xbf\xf6;\xf7\xadU6\xec\xbfy\x02m,+\xf8\xe4\xbf\xfe\x14\xfa\xe2$\xd9\xc8\xbf\xefm\x98;=\x98\xde\xbf,\x04\xa9\xf0\xb0\xbc\xe7\xbf\xd6\xe2\x01\xcb+\xc9\xc8?\xc6\xd5\x82\xda\xba\xd7\xd8\xbf\xcb\n\xa3\x85\xcf\xe0\xec\xbf\x18\xea\xfb_\x98\x19\x87?\x12-\x0b\xec\x9b\x94\xc0?\xfa\xd0m\t\x95z\xf0?})}\x9c\x8c\x1b\xd8\xbf0\xb8\x0c\xa66\xaa\xd7??\xaaI\xb70\x9e\xdb\xbf\xe5\x87y\x8a\xb7=\xd5?\xf88H\xf31 \xe7\xbfMc\x8b\xf4\x13\xce\xc3?H\xfaW\xb5\x03\x85\xf0?()\xd1D\\\t\x9e?I\xe3v\xf7\xfdw\xe2\xbf\x8f@\x8b"\xbc@\xd4?q\xdd\xc7X\x02m\xf0\xbfoL\x1f\xbf\x81-\xcf?\x97y\x11M\xbcL\xc9?\xdb(;p\\"\xcd\xbf\x87\xfb\xbec\xc3b\xe3\xbfJLB\x94#\x95\xdb\xbf\xe1/\x96Z\xf5\xf3\xe3?+\xb1{\x0e\xe1\xdd\xe5\xbfGt\xde\xec\xd2$\xe8\xbfLc\x9f\x07\xae\xe1\xe5\xbf\xaf\xecd\x82~\x18\xe3\xbf!aZ\x94\nn\xdb\xbfr\xfe\xfaw\xa4\x87\xf1?\xf2r\xc1\xa7e\x1a\xb9\xbffX\xb0\xc1\xecb\xd8\xbf7\x9bQ\xce+\x92\xe5?X\xa9\xe7\xff\xaaG\xc7\xbfr\xfb\x05#\x97\x9b\xc6\xbf\xf0\xfc\xc67NF\xbb\xbf\xf5\n\xbc\xb7\xdb)\xeb?\x91\x12x\x87\xfc6\xb1?\xa2\xae\x04\xbb\xbdX\xeb\xbf*\x95\xfe\xa6\xfa\x7f\xe4?\xff\xd2\xd3\x04\xc6\x8f\xd1?\xa68\xcc\xe1\x81\xb9\xf1?{Zz\x92\x13\\\xa4?\x90\x83(X\xa3\x97\xb4?\x80u\x17E\x9fQ\x97?\x8c\xb8\x1bOc\x0f\xe2?\xb2\xad\xd1dq6\xf1?r\x0e\xc5\xf6\xddH\xdb\xbf\xb7\xa6E!_\xde\xc0\xbfC*Nf\xf4\xc9\xda\xbf\xb1j\xb6\x9a\xf6\x9a\xd6?\xb2\xf5\xe6\xb1\x80\xfa\xd9?#\xb6\x00\xe7\xf6\x83\xc9?\xe6z\xd6o\x07\xa1\xe1?_\x97\xa3\xfd\x1d\xfb\xd7\xbf\xfe\xb0\x15\xd4\xd3S\xf4?R\x05)\xec\xee\xa4\xc7?\xd7\x9c$\x8d\x11`\xd1?\x8bV.x\xe7h\xd2?\x9b`<\x98\xfe\xce\xdb?P\xd8_9\ri\xb9?\xbe\\x\x1c\xfa?\xec\xbf\n8\t\x86A4\xb1?[l\xa2s\xa7\xb8\xc7?\xd0\x83\xe5:\xcd\xe1\xe3?\xf5U.\x00\x9e-\xc8\xbf\x89\xc9\xe2\xae&\xe0\xb5?\\2\xb4\xef-\xf7\xd9?T\x84`P"\x18\xf0?\xe7\xb8\xb0\x10D`\xd5?w\r\xdcb\xa7\xce\xe4?\r\x89a\xd0\xd4\x17\xe6?i\xb7[\xd8\x91\x11\xb7?\x0f\x9c\x88\x13\x7f\xdb\xa0?\xddY\xc98\xbd*\xeb\xbfu\x94\xb8\xdb46\xd9\xbf\x17\xc9\xf5\x14\xa4\xfe\xe1\xbf\xa5{\xac\xf0<\xa3\xf2\xbf\x1c\x9d\x07\xc6=Q\xe2?\xdfp\x16\x1d\xb9?\xe7\xbfK\xba\xaf~GV\xe9\xbf\x93b#\x93:\x7f\xf3\xbf\x9a\xd1\x11A\xaa\xce\xc5\xbf\r\xeb\x07wA\xe9\xe3?\x96\xbf\x0e\xb2\x1c\xa9\x8d?\xef\n\xb27\x1f\xb9\xc3\xbf\xf3[X\x08\x0b\xd5\xe9\xbf\xd2X\xe4\x85\xf0\x14\xe0\xbf\x11\x1c%o\xd8\x12\xe2?\xc2.5z\xa1\xc8\xb4?\x10ZI\xb7Hk\xc0?%\xfc\x1b\xc4Ce\xe6\xbf\xea\xd4\x03H \xac\xf0?\xbd\x10\xa9Vg\xa1\xc3\xbfk%\x9d\x8b\x81\xe8\xda\xbf\xed\x90\x1f,\xd0\xbb\xd1\xbfxy\x93\x17 \xc6\xe7\xbf:5\xa8\xd3\x99\xac\xe7\xbfm\xba_ih\x9f\xc0?l\x87\x98R\xd2{\xaf\xbf\x10\x8e\xd5&[\xf1\xe8\xbf\xde=g\x935=\xd3\xbf\xba\xa7o\xf4\x1d5\xbd?g\xca\xda\xe3#3\xd0\xbf\x99\xca\xd0\xc1\x17K\xcb\xbf\xaaRD9\x88\xd1\xe8\xbf\xfd\x9ct\xaa\x116\xd3\xbf+ucH\xf5\xe6\xc0?\xfd\x07\x18\x8d\x03\xaa\xe5\xbf\x10\xd2)\x1a\xf0r\xcf?\xb3\xec\xd8b\xc9\xf7\xf0\xbf8K\xf3\x9a\x92}\xcb?\xc7}d\xf6\xd8\xc6\xda?\xe3\x19A]\xb0\x95\xd8?:<\xd07\x97\t\xd7\xbf&6?\x91\x98\x9a\xd7?\n\x95|\xb9^:\x9f\xbf\x99{2\xbb#\x16\xe9\xbfn\xe5\xb5\xe4\xe9i\xef\xbf\xcf\xba\x99\x97\x7fx\xeb?\xeb\x05SuQ\x15\xf4?\xa1w\nXo\xb1\xe0\xbfB\xae~\xef\xf6\x85\xf6?2\xe7\xce\xa6\xa3\n\xe7?\xa7\xc5\xdd\x9b+\xb7\xea\xbf\rJ\n\x03\x7f\x87\xe2\xbf3I"D\xffx\xc5?\xea\x18z\xa3\n\x07\xc7?o\x06W\xc5N\x0c\xc7\xbf\xe1\xc7v\xd6\x06\xfd\xf1?\x98\xe1W\xd8al\xdc?\xba\\\xf0\x92\x1e@\xe3\xbf\\\xcfO\x03S\xb2\xea?{\x1dN\x94\xf4\x1f\xdc\xbf\xb0.\x87\xce\xf8\xac\xe6?\xbd\x86\xe6v}\xe8\xba\xbf\xc6\x91?\xf1s\xea\xda?c\xea\x04\xdeO\xc0\xab?\xb4G\xa9HD\x9c\xb1?C\x90R\x90\x19\xd6\xe0\xbf\x8af\xd5\xb9\xb1\xe9\xd7\xbf \xb0\x88\x03\x13z\xe6?\xbf\xdb\xf45\x19`\xa2?\x1cw\xe8,\x06<\xc9\xbf\x1e\x00\xe0C\xd4S\xe1?=75\x0c\xcf\xa8\xdd\xbf@\xfb\x16\xb1\xb9\xe3\xac?dM\xbfo*N\x99?\x17q\xd9n\x88&\xe4?\xb0\x9e\x8a\x94n\xe6\xe4\xbf@\x1ct\xf2\xa3g\xe4\xbfg\xdc\x8a\x1e\xabs\xf0?\xc7\x88\xbe\x11\xbe\x8e\xd9\xbf\x0b\xf7\xce\xb7AJ\xdb\xbf`\xa8\x86o+\xde\xc3?\xe5\x84\xb8\xc8\x1en\xed\xbf\xb4\xa8\xc2\x9d(J\xcc\xbf]\xbdr\xd9\xa3Q\xf9?\x11\xbb\xad\xaeo\xb5\xc1\xbf0\xd2?|\xf2\xd5\xe1?\xcd}\x18e\xdcG\xe7?:\x8aX\x84\xea8\xa8\xbf\x12Ld\xa9\xb2\x80\xce?8\xcce\xfc\xc4f\xcb\xbf\xdb\xdeuE\x07\x1b\xed?\x91=\x14\xecQ\xc3\\\xbf\x86h\x92\xde\x8a\xe4\xe8\xbf\xbb\xb8\n\x8as\xdb\xf2?\x9a\xab\x05\xa0\xb8#\xc0?\xc7\xc3\xc8\x96\x8f0\xf5?\x0ca\xd3\x06\xf9\xbe\xbe\xbfN\x9d\x12\xa9\x97^\xe1\xbf\xa9^6\x8ci\xa2\xc7?\xd3\xe5\x9fkt\xc3\xd8?+\xf1\xd5v\xe7\xa9\xe7?&\xd0\x10\xd4\xde\x8a\xe1?\x97\xa7\x82\xe2\xde\x9d\xee?z%\xe7\xa74\xe8\xea\xbf\xf6\xb4\xd2\xc9\xcck\xc9?#\x9a\xcf\x9a\xfd\xce\xe7?j\x18\xdf\xad>W\xa9?\x86g\xae:\xcco\xe2?\x8e\x1c\xea\xfb\xf6\xb0\xe4\xbf\xbc\xf6\xfa`hc\xf2?\x9d,1\xc1f\x94\xd2?/\xce\xe0\x85I\x02\xd9?\x9co)\xd8\x04\x04\xba?\xb0\xbbu\xd3h3\xf0?\xd2\xf6\xbb:\xbe\xac\xdd?\\\x9d\t\x9e\xec\x02\xde\xbf\xaeS\xa5\rLB\xd6?\xbf\x87X\x99\xb1\x8c\xc6\xbfE\x11\xf4\x9b\x94\x9a\xe2?, n]\x12d\xcc\xbfi\xe4\x87\tF\x92\xe1?3\xc5L\r\x96\x13\xcc\xbfMvM\xaf\x1d\xc0\xf8?.\xd49\xba;\xb1\xe1?\xf6^5\xbapY\xc2?\x12\xba\xd5RNg\xef?\xf0\xa3\xa6\xba\xf9w\xc2?Iq:k\xdb\x03\xab?LJ\x93\x9d\x9f$\xea\xbfB]\xc5Y\x99\x16\xda\xbf6\x07"\xb0\x10O\xf0\xbf\x12n9$\xf5\x06\xe1\xbf\x17D\xec)\xebC\xf0?\x10\x00C\x0b\xa5\x0c\xeb\xbf\x17\xe2\x07\x02\xae\x8a\xe4\xbf\x94\xeaE\x9e\xcf\xd7\xda\xbfE\xac\xcbN9\x02\xc0?\xf8R\x03J\xdb\xf5\xf7? J \xec\xc5=\xb4?\x86\xcfY\xf0\xce\xd5\xc3\xbfu`\xado\x93N\xe9\xbf\xa3\to\xe4OJ\xc5\xbfU\xce\x01\xe1\xd3\xfd\xf7?\xbd\xb2t\xc0\xec.\xdc?J2:\xab\x81N\xbc\xbf\xbd\xb3\xaa\xe9\x9d\xff\xe5\xbfrg\xc1\xdd*4\xf6?\x8dC\n\xd7\xb4\x03\xc7?\xbf\xb2P\xa3K%\xd0\xbf\x19\xe94\xa5\xf8\xdd\xdb?\xd1(cFD%\xd2\xbf\x08X;\xe2\xf8~\xda\xbfZ\' \xe0*\xa8\xd4\xbf\xae\xba\x0b\xb4}be?|8\xcc0\x86\x16\xe7\xbf\xea\x9d\xee\xb8\x1dm\xca\xbf\xfaz\xd5\xb3:H\xc1\xbf\xdf\xf1\xff\xb8k\x1f\xe3?\x12\xf7\x85\x08\xf4\xc4\xe1?\xed\xaa\n\x82`\x81\xe8\xbf\xf0O\xa7\xb2\xf6g\xe2?g|\xf4\x98=O\xf0?if/\xac\xff#\xe6\xbf\xc9}4\xdf\xce\x12\xbb\xbf\x92\x13\xf7\xa6\x82Y\xf3\xbf\x0e$\xbf\xbak\x1a\xdc?2\x01\xaf\x19\xe0\xa1\xa5?Fy`-#\r\xf1?i\xa8\xa1_\x95\x0f\xd8?\x1c\x0f\xd6\x1c\xa4S\xc2?\xd2\x19Bm\xf1\xa3\xdf?\xad( \\\xb2\xb3\xe7\xbf\xbf\xd7\x10\xbd6\xf1\xee\xbf\x87\xc5\xc6`\xe6\xeb\xb2?\xb4\xda\xd9\xd8E\x1a\xf2?\x13\x87\x07\xc2\xdf\x10\xc2\xbf\\\xc1\xd9\xedC\xcf\xdf?\x9bmc\x84o\xa1\xf2?\xcfxb\xacX\xe1\xea\xbf\xdf\x93\xe5\xeeV\x85\xe7\xbf\xa4zJ#\x19\x8f\xe0?@\x80\xb6\xc3lK\xeb?\x94\xff)@Y\xb8\xd4?9r`\xad7\xc5\xeb?\xc1G\n\xe8\x8d\xfd\xef?,Z\x05Q\xa9\xf2\xe1\xbf4\xc5Wj\x01\xe0\xe7?\xfbY\xd5K@\xd6\xef\xbfv{\xa4#\x98\x8d\xd2\xbf\x88(\xa4V\xde~\xb2?\xdaf\xa9\xc0~\xf7\xd6\xbf>\xe0\xc4\x88rn\xd2?\xa7\x8a\xeb\xc5}\xf2\xd7\xbfg\tm\x05"\xe5\xbe?_\x99\x1aU\xbc=\xef\xbf*\xce\xce-\x0e\xfd\xd3\xbf\xed\x13j8\xe2w\xd1\xbf\x12C\\\xf4\xe7\x14\xdd?\x15_E_\xce\xec\xe2?K\x06\xfc\x0b\'W\xda?MT/\x87\x1b\xba\xe3\xbf\xe1AL\'j\xc0\xad?\xdbb\x9dt\xd0\x86\xf0?{X\xab\xe1\xb58\xe3\xbf\xa1Lh\xf86>\xee\xbf\x81Q\x87\xea\xe6\x9c\xed?\x01\xfb\x8c\xed\xcd[\xc3?\x0b?9eF\xa8\xd2\xbf\x8b\xa2\x9b\x89\x96\xc1\xdb?\xe3\nN\xfeA]\xee\xbf[ \xd9\xd3S\x1e\xdd\xbf,"\x9d\xc1\x1e\x82\xe1?\xf0\xfb\x1f,\xee6\xb9\xbf\xe6\xf8\x9b\x13\x7f\t\xe7?\xd6:.\xf6\xf2\xd7\xb9?:\x8c\xf89\xf3\x0fw?\xe1.|Y\xa8\t\xc8?G\x93\xaa7\xed\x11\xd9\xbf%w\xa3\xa3\xb2\xe9\xc1\xbf!\xc1d\xa2\x82\x0e\xa0?{T\x0e\xfb\'e\xe9\xbf\x0b\x10G\xc0\x80\xda\xe6?\xcf\xdeN\x02d\xde\xdf\xbfmJj\xb4D\xd9\xca?\x96^\x00O\xf2\xac\xd5\xbfe\x80Z\x0e\xee\xd7\xef\xbf\xa1\x907\xd2\x82\xb3\x93?\xec\xb6\xaf\x03p"\xc2?[#\xde\xe8\x9c\xe7\xe2\xbf|s\xb5\xf1\x0c\xfb\xf2?-\xe25\xfdJ\xbf\xf2?\x19\x1ezuec\xed\xbf\xa1\xa4\xf3\xb5\x17\xc1\xc1\xbf\xca\xe3\xe3u\'\\\xd7?n\xe1^@\'\xc6\xc3?\x9cR!\xf3c\x11\xd5\xbfy\xbdV\x95\x1d\xe0\xf2\xbf\')\x94J-\xd5\xaf\xbf\x83I\xb6\x1d*\xc9\xa5\xbfM\xd5\xf5\x88F1\xb5\xbf\x0e\x85zc\xc4\x8e\x91?\xa0\xf1^\x9dY6\xe7? \xba\xc3\r\xc5I\xa7?\xa0oz\xe2\x0b\xfd\xdf\xbf\xe5l\x0c9c.\xaa?\xa1\x8d\xb3\xe2\x9b\xb0\x9d?\xfb\xfe\x19A\x86\xd8\xc6\xbf\x93O\xfe\xf1Q\x97\xd4\xbf\xc7n|a\xec\x7f\xd7?\xfa\xbc\'\xd9\x19|\xe4\xbf\xfdr\xa6\xc7\xb5\x9c\xe1?\xe0#\xcf$\x90k\xa8\xbf\x17\xde\xd0\xfe\\p\xe2\xbf\x9b\x03\xcb$\xd3\x95\xe3?\xc5\xbd\x80|\x81~\xb6\xbf.\xf8\x1a\x85[\x9f\xd2\xbf\xef%\xd0B\x89]\xe5\xbf\xdc\x80\x8f\xea\xf5\xaf\xe2\xbf%\x7f\xee\x1a\x16k\xf0\xbf\xf4u\xf3\x03\xe1\xeb\xb5\xbf\xc0\x8d#\xe1\x97\x92\xe0?\x90z(RO\xb0\x9a\xbf\xa4$\xe7\x13M6\xe5\xbfjJJT\xcfT\x92?;v\x13\x03\xb2G\xb2?\x07\x9b\x1f\x06\xb1\xb6\xe7?\xe3\xb1\x8f<\x1c\x1c\xd7\xbf\x18\xa7\'\x9d\xd8\x83\xb7\xbf\r\xebzE\x1f\n\xe8\xbfZ\xceQ\xdf\x14\xb1\xa5?*\x0b+\xe1\x98A\xf1?\x8b\xe4\xc46\xa4\x8e\xbb?7H\xfd\x88\xfb#\xeb\xbf\x02\x97_\xee\x9e\x82\xb3\xbfj\x0bQDj\xb3\xdb?_&bdV\x99\xac\xbfb>D\xb3\xd5-y?\xd1]\xf2Aq\xbd\xe8?\x17f\xce\xde\xfe\xb7\xe2\xbf\xc85\xa6\xd8\x05*\xd9?\xc5\xb5\xd7\xaeA\x18\xdd\xbf\x80o\x1a\xc0t\xa2\xbd\xbf\x06\x96\x0fF\x9a\xbe\xe5\xbf\xb2\xc9}\xa7\xba\xda\xd3\xbf<#ZY\xf2\xa5\xe5\xbf\xa80U\xc9\x8d\xd0\xe5?K6W\x05\xbd\x84\xe3?\xfdA\x1c\xcd\xee\x02\xe0\xbf5t\x03\xbf\xc8\xab\xe6?2\xf7\x02\x1a\x047\xee?\x88a\xf1\x1f\x1fG\xe9\xbf\xdb\xd5I\xc9G\xd5\xdd\xbf\xfa\xc7\xa2\xe8\x9a\x8b\xe4\xbf\xc5E\'\xe5\x89\xcf\x91\xbf\xe3|\xd9T\x99\xbd\xe1\xbf\x9a!\xdd\x02j\xd5\xe8?\xb0\xdeY\xa5\x11+\xe2?'
p33
tp34
bag2
(g3
(I0
tp35
g5
tp36
Rp37
(I1
(I9
I256
tp38
g12
I00
S'\x99\x13\xa3B0>\xee\xbf!^\x00=\x18\xfb\xec\xbfc\xf2e\xf1\xe6\xbd\xbe?<.\x87H}\xe6\x9b\xbfM\xd5U_\x8b\xf8\xd1?\x8d<\xe78_\x17\xf0\xbfU\x1f\x87\xf5\xa1\xad\xe3\xbfA\xa3Q\xfd\x96`\xf0\xbf\xa2\x1d\x9b\xab\xd6\x1a\xb6\xbf\x97o\xf77\xa6F\xdc\xbf\xb1\xeb\xdfx~\xde\xe5\xbfT\xe8\xf8\xc5\x97\xa0\xf5?\xbe\x8a\xc3\xf5>\xdc\xec\xbf\xfc\x93x\xc4\xcbo\xd0\xbf\xd6\xf2\xb9\x10\x16G\xcf\xbf:\x86\x12\xd7N\x17\xd8\xbf\xcf\x8a\x1c\n\x80t\xb0\xbf\x0e\x82\x0cF\xc7w\xe0\xbf\xd3\xd9R\xbb4\x11\xca\xbf$\x06\xbd\x81?M\xe2\xbf\xd4j\xfaCc\x99\xbf\xbf\xc1\x89N\x9c\xccy\xdd\xbfi\xf0\x95G\xa6\xaf\xf2?\xcc\xf5O}\xa7E\xd5?\xbdh\xea.-DK?\x86\xf6\n\xd5\xf4\xe8\xb0\xbf\xc5\xf1\x08[O\x86\xcd?~\xdf1\x14`\xb0\xaf?\xac&\xe2\xad.\xc9\xd1\xbf0\x8f\xe5\xb3\xc0\xf2\xb5?\x08\x8b~C:\xf7\xd7?\xa0\xa6\xd4:\x82E\xe5\xbf\xf2\xf8\x8e\xdbGf\xf2?BG&\xd3\xc0\x81\xe9?\xbe\xff\xd5\x06\x1aY\x9c?\xa5\x96\x1f\x9f\x8d\xef\xe5\xbf4\xf6w\x9c\xaf\x90\xc1\xbfZT;\x7f\xa3\xc4\x86\xbfV\xf3\xa8\x84\xc1w\xe7\xbf.w|5\xebY\xd0\xbf\x8e\'(\xf4\xfee\xf7\xbf\'\xd7\x04\xe3\x8d\xd6\xe0\xbf\x97\xdb/\xb9m7\xd7?5a3\x90\x91[\xe8?\xd4\x04\xf8:#Y\xa8?\xc9mBw\x04\xf7\xf0\xbf\xacd\xf2"\xe0\x9f\xe6\xbf\xc0z\xf4\x973c\xae?\x99\x83g,\xa8\'\xeb\xbfq\x98\x0c\xb5`2\xf7?\xa7\x98(M\x83!\xc9\xbfE\xc02\x90\xfe\xd9\xe5\xbf3\x98\x8db$\t\xd0?\xdd-\x10wO\x93\xce\xbf\xdfQ\x83\x0b\xaet\xe0?\x9d.\x9d\x9d7C\xe8\xbf\xd9\x0f\xf8\x1c\xf2\x01\xe6?Z\x1f\xab\xd0\\3\xd3\xbf>\x89A\xab\xf8I\xda\xbf\x98\xd6Quz\x91\xba\xbf\xb6\xfa\x94}j\x7f\xe7\xbf\x84\x05o0\xbb\xfd\xed\xbfq\x0bB\xbb \xa2\xd5\xbf\xa7 /\xb2\xa2r\xca\xbf\x04\xee{/}\x83\xe8?\xaf\xaeEp\xdc\x9c\xe7?\xfb\\N\xea\x8d\x8b\xd6\xbf\xe4\x99 X9\x92\xe2?\x12I\xb0\x9b\xdb\xd8\xee\xbf\xacN(\x01\xa5y\xe1?\xae\xbe=wk\xd3\xe0\xbf\xfc\x19\xca\xd9\xc24\xdb\xbfO<\xb1\xcd<\xf4\xe3?\x85`{\xe6\x17\x90\xb6?\xc1\x0e\xb0e\x0e\x96\xe9\xbf\xdaL"\x16VG\xda\xbf\x98L\x14\x81;\xe6\xe8\xbf\xf4\xed\x93\x9d\x0b}\xd9?\xc4\r\xdd\r\xf8\xf1\xe9\xbf\x00_P\x83\x10=\xe6\xbf\xe1\xac\r&8\xe5\xce\xbf\xa7\xfbB\xbfA\x11\x80\xbf=`K\x14\x8d\xc7\xb6\xbfR)8>\xce\xa4\xb9?-Vu+\x95\xa8\xe0\xbf/Zm\xb1\x83\xcf\xcc\xbf\x12\x07\x83_\xd4\x9b\xc3\xbf\x85^9\xaep\x1f\xca\xbf \xe1\x9fs\xaf\xd9\xd1\xbf\x96\x164mB\xc6\xd4\xbf\xf8\xee\x11\xfd./\xd9\xbf\x85\x82\xa3uU[\xe4\xbf\xac0q9?B\xe6\xbfumu0x\xa6\xf9?\xbc3\xa5\x0e\x94\x1e\xa2?0Ax&3\xda\xca?5\x9f\xd3\xa9\x11\xd9\xd0?6,\xe6\x05\xbb\x87\xc9?\x8e\xe4\nI\x13$\xe4?\n\x07\x06\xd1\x94C\xf4?\xb0\xe21V\xc5\x81\xe7\xbf\xdf\xc4oP2\xff\xe0\xbf\x8a\x1a\xe8\xdc\x07\xdd\xe6\xbfF]\xbe\xb8\xe9D\xe0\xbfW[\xafT\xb2t\xcd\xbf;\xbe\xf8\x87\xb49\xe1\xbfvVe\x7f!n\xe1\xbfh\xd4\x12j\x15>\xdf\xbfw\x92\x1a3\xa9\xf8\xd0?\x80f\t\x92D\xc0\xd7?\x9b\xd5*N\x9f\x81\xb8\xbf @\xeefN\x7f\xf0\xbf\xe1\x80\x071\x1b\xaf\xad\xbfcu\xf0#\xa4\xe5\xc7?J:\x19#\xa9x\xd4\xbf\xf4\xe6\x94\x96\xb6\n\xc4?`N\x83\xff\xa3\xd7\xec?\xee\xe9\';\x06\xbc\xef?]\xb6\x1b&\xcf\xf5\xf9?w\xfc\xd0\x0fy\xaf\xd5?v\xcf:l7\xcf\xe5?g\x1c,\x1b\x97\x1e\xe4\xbfUI#\x0c\xbe\xa5\xf0\xbf\xd4\x0bx\xda\x8b\x88\xeb\xbf\x9aC\xc9T\x9eH\xbc?\xcdW\xb3\x03\x95}\xe3\xbfX\xf1\x8e\xba\xe7E\xc0\xbfb\x89~\x8d\x95]\xae\xbf\xc4\xee\n;\x03\x94\xc9?O\x1dcY\x89\x1c\xc8\xbf+\xf9\xa0x\xde<\xed?:Z\x14\xc1Q~\xde\xbf\xc3\xd9~\xa2\xa4\x90\xd8\xbfbF\xddh \t\xcf\xbfk~)S\xe3f\xd9\xbf\xd9\x01qFY\xeb\xe8\xbfz\\\x8f\xea\xc5\xfb\xe7?\xf6\xe4\x1f\x9c\xb6\xef\xc0\xbf\xafSX\n.\xf8\xdb?\xdeG>\x15\x11\xa5\xd5\xbf@\xabR\xec\xac\x0b\xf1?(\x84)$\x0e\'\xeb\xbf{\xa5\xeb19\xa2\xe9?E\xda\xb8\xfa \x89\xe2\xbf\x11I\xbb\x1b\x0ft\xcd?\xf1\x98\xd1\n\xc8;\xe6?\x11R\xa9\x02)\xc0\xd6?-\x98ig\x04\x11\xe3\xbf\xa3y\xb8\x9b\x8c\xf0\xea\xbf\xf4*\xe61\xb7\r\xf8?$\xcc\xe1\x17\xbb\xc6\xeb?y\xf2_WeT\xc0\xbf\x119\xccJ9\xcd\xc4?\x87\x18\xb9\xda\x12\xb7\xc6\xbf\x93\x0e&\x8f\x86\x1d\xe4\xbfgFr\xb8\xb1+\xd7\xbfZ\x9f\n\xc3X}\xe4\xbfy\xfa\x92\xbd\xbd\xea\xc5\xbfQ\x90\x9f\xf1a\xa3\xcc\xbf7\x0f\x993,\x97\xc2?\xb8\xaa\xca\xc4\xc6-\x96?\xb7\')\xc6f(\xf0\xbf\xffV2\xf1\xa8\xe1\xd9\xbf>\x82:\xc0\x05\xd1\xf3?\x93\xe0r\x93\x92\x0f\xec\xbf\x19qu\xa0eN\xf1?\x80\xed\xf05C\xe6\xed?\x8f;BO<\xf9\xbd?\xf26\xaf\xff2\xfc\xe4\xbf(\xb0\xd6\x1cc\xe7\xe2\xbf\xcaL\xf2wX\xdc\xe2\xbf\xac</\n\xd2F\xd0\xbf\xe3\xbd\x02\xd9\\\x81\xc3?Q\x87\xf3s\xe0\xbb\xda\xbf\xa019G\xbd\x84\xd5?t\x97 \x87Ah\xea?Q\xf21\x1b\xda\x1e\xe9\xbf\xa9.\xcb\xac\xcd\xe9\xe1?M4\xd0\x02\x14\x18\xe8\xbf\x82op\xa8\xe9\xd2\xd1\xbf\xfa\xf8\x84x#\n\xda\xbf\xd3\xf4\x18\x0c\x7fD\xe4\xbf\xae8\xdfgw\xf3\xee?\x86\x7f\x17\xe3\xe5&\xe9\xbf\xb5T\xc7?\x00\xec\xd1\xbf\xe7\xd5C\x80\x97\x12\xf0\xbf\x9e\xb2\'\x08\x98S\xe5\xbf\xae\xc7\xdb!8Y\xe2\xbf\x88\xa9N`g\x0c\xe3\xbf\x9d\x15\x9c\x97\xbfb\xeb\xbfQFPa4\x06\xe0\xbf+\x81\x9a\x06Q\xc9\xf4\xbf\xb5\xb3.3\xa9\x7f\xf4\xbf\x99\xb2KM\xcdn\xe7\xbf\r\xe6&"\xe7Y\xe0\xbf4\xdc\x11\x14O\xb1\xe2\xbf\x84\x1b!UN\xb8\xf0?<x\xa8\xc5T9\xbb?\x99\x01\x83W\xcc}\xdb\xbf\xad\xfa\x12\x02U4\xe3\xbf\xb4\x08\x01\x9a4\xbd\xeb\xbf\x1c\xf1*\x0e\xf5:\xac\xbf\xd3aj\xf4\x8c\xd2\xc8?o<\xdca\x0eJ\xc6\xbf\x19\xdc\xeeD\xaf\xd9\xed\xbf\xa6`A\xa7\x0e\xfd\xf2\xbfn\x9e\x19M\x93\xb4\xf0\xbfP\x08;\x08\x017\xe8\xbf\x18T3\xc7\x8e]\xd4?I\x14Xjhl\xe5\xbf\xb5\nn\x9f\xa1\x1a\xe0\xbflh\xd5l\xf1\xae\xcc?\x1e\x81-v\xa8\xd1\xdf?K\x94[\xf5\xfa\x99\xe7\xbf\xbd\x99B\xda*o\xdc?\xdf-\xdc\x08\xfe2\xe6\xbf\xd3R\x01Z\x9do\xe6\xbfM\x91r\x0b\xd5\xbc\xe4?U\x9b\x16\xdb]\\\xce\xbf\xf4;\x06\xc3/\x18\xe2?\xe1x\'}\xdb$\xf6?\x8f\xd1\x04\xd6[\xa3\xe4?\xe7\x1d\x94\x0cTP\xe2\xbf|s\xd2\xca\x96f\xc7?\x1f\x822\x980\xf0\xa7?\xac\x8fe#\xef\xf9\xe3\xbfR\x19\x00?\xe8m\xd4\xbf\xc2\xa3\x16\xac\xa3l\xf1\xbf\xdf\xf2\xaf\x06]9\xe8\xbf\xd2n \xaf\x1c\xfa\xea\xbf\x9fC\xb9\xb1\xec\xff\xe1?\x0f\xca8M\xe3m\xee?M\x84~pzN\xe9\xbf\xa99{\x8e\x9c\xcb\xcb\xbf\xffW{|^\x87\x95?IuF\xfc\xe0%\xe6?7\xa3dV\xbfc\xe3\xbfk\xca\xb7\x06\xf6$\xe6?\x07\xc4B\xd3+\x1b\xe5\xbf?\xf6\x0e\x7fW\x80\x9e\xbf\xf8C\x0bV99\x92?\x17\xf6\xbc\xe1.\x1d\xf7?b\xc4\x1eoW\x0f\xb5\xbf\xd6?`A\xabh\xdd\xbf\x92\xb3\x0bf\x8dG\xad?1\xb8\xb1,y\x7f\xc3\xbf\xd0\x91\xe3\xb5\xe3\x12\xbd?$\x86\xe5\xfcB\xc1\xd5?I\x10\x8a\x00<\x11\xeb\xbf\xd9\xa6%\x82$h\xd0?ggK\x91\x19;\xd4\xbf\xac\xed\x9c&i\n\xd8?\xa8@\xffK\x1b\xf5\xe4\xbf]:4:\x7f\xf1\xe9\xbfLzV\x05\xe5\xb1\xca\xbf\x04\x9d\xba\xd0\xa1\xd8\xc6?\xc4s\xd2b\xea\x05\xea\xbfm\xad\x8f\xa9_\r\xed\xbf\xc0\x12\xc9\xa0\x1b\xfd\xd1?\x01_\xce\xa5\xa8\xbe\xd6?\x97h\xba\xe8V\xd0\xd2\xbf\xba+:\xb4uE\xcd\xbf\xe0\x166\x01b\x0c\xe5\xbf](\xbdE\'\xbe\xe6\xbf\x01h\x01pt8\xd8?\xaf\r\xf3*\xe7)\xca\xbf\xa5\xea\xbb\xc7\xa2\xe4\xc4?gJ\x1e\x8c\xf2\xfc\xe1?\x1f\x8a\xbe\xec\xffp\xd5\xbfw\x9d\xa5\xb7Ve\xc8?\x8dbI\xa8\xbf\x1d\xe9\xbf.Q\xfe\x97\xdd\xba\xe8\xbf\xab2t\x05\x92\x05\xe2\xbfK\x19\xe9m?X\xce\xbfNe{dl0\xd1?o\xc0\xce\x9e\x11\x81\xd9?\xb4\xd9\xe4\x9d\xe0o\xe3\xbfDOAX(K\xb7\xbf\x95\x7f\xd3\xef\x7f\xa0\xbc?*\x11\xe5A\xc18\xe0\xbfU\xc6<%\xaed\xd1\xbf\xa1\x0e\x14\xfc\xcf\x89\xd5\xbf\xdb\x9bg\xad\t(\xe5\xbf\x1f[+K\x05u\xbb?u\xc0\x98\x01\xb5\x13\xb2\xbf;%`qm#\xf0?\x9cL\'\xbd&\xd6\xf1?\x8a\x99\xd1\xa0\xbe^\xca?\xfe\xea3\xc9z\xe8\xf2?Y\xb8\xc9\x02\x0bI\xe8?\tG\xe9\xac\x13\xab\xd7?s\x04\xa6\xd1J\xb7~?\xfc\x14\xeb\x9e\x99\xf8\xa6\xbf3\x7f\x1f\xa3\xf7R\xe1?i\xf4\xf6|n\t\xe0\xbf\\z\xc6B\x90k\xbd?\xa3[C[\x97o\xed\xbf\x86\xdd45\xed\x8a\xe7?\x89\x90A\x00\x0c\xfa\xd0?\x08qQ\x8a\xd79\xf3?\x8c\xed"\xe3\xbae\xd8?5\xf51?\x14\x80\xce\xbf\xc7\xfax\xaa\xe9\x81\xdd\xbf\\7/\xda\xec\xe7\xcd?\xc9\x9bk\xe92\xb3\xe0\xbf|\xe4\xce\x86\x15\xc1\xd0\xbf\x02\x8d-\x12eu\xe6\xbf~\x11\x07O\x9ey\xeb\xbfQ\xd6\x0f\xfb\xa5\x08\xef?\r\xd2\x88\x7f\xd0\xe4\xe6\xbf-\xedo\xe4\xe7\xd6\xea?\xb8\xb0\xbe\xe3s\xf0\xe8\xbfQ\xe6\xcc[\x83\x1e\xdf?\x06\xae&\xa3\xef}\xcf\xbf\x03e\x88&\xf9T\x9f\xbf\xeb\xb1g#}\xa7\xc7?\xc2PP\xdd\x99\xf9\xb0\xbf\xb0B\x9b\xfd\xbf.\xdb\xbf\xe9\x7f\xdc\xa5\x1d\x11\xe6\xbf\xeb\x11\xdc\x1a\xce\xb5\xe0\xbf==f\xd7\xe3\x0b\xeb\xbf0\xd3\xae\x99\x9c^\xdc?\x084]O\xf14\xe0\xbf\x1d\x10\x0e\x953M\xc3?\xc3\xc4f\xce\xf2\xc0\xe3\xbf\xc4_C\xf2l\x84\xf1?\x91c{\x1d\xf6`\xcd?\x8f\xee\xd0\xef\x11\x16\xc0\xbf\x0fH\x84P[:\xe9?\x0f\xd5~\xbf\x7f\xad\xe6?|\x9f}\xbc\xfe\xf6\xd0\xbf\xdc{\x9b\xc4*\xb0\xd0?q\xbfG\xe7)\xc5\xe7\xbf\xd5\n\x8fD]\x8e\xfc?\xc9\x93\xfa\x1e\xd9\x9f\xe8\xbfI\x11\xa6\x0fn\xde\xb1\xbf\xac\xdb\xe7\x10\x07Q\xe2?\xf5\xec\xa4\xe77h\xc5\xbf[\xa5n\x17\xae\x05\xd6?"\xe4\xfdC\xd3\xda\xe3?\xb0\xda\x18dOD\xc3\xbf\xee]\x9f$\x1b\x9e\xa5?;\x84\xe5\xa1\xfd\x9e\xce?>\xf9Q\x8eT\xa4\xca?\xf4\xfb?\xa0~\xe9\xab?0)\x19\xf5\x8e\x80\xd3\xbf\xbed\xd19\xba\x08\xc2?\x90\x01\x15\xe2\xe9\xab\xe5\xbf\xeb}\xe0\xe13\x88\xe3\xbf@\x8d\xb8s\x0e\xd5\xf4?sW\x0eH,\xe8\xd2?\xd9D\x06\xcd|\xe5\xd5?\xa8\xef\x9a\xc7cZ\xd2?3N\xbcL\x92\x9d\xe4? \x8b\xb7[\xf9\xc5\xf0?G\xa4\xcd\xfe\xff\xab\xe0?{\xb8\xc0\xafI\xa4\xe3\xbf\xa6\xad\xe1&Y\xce\xeb?\r0[G\x04"\xe8\xbfB\x86s\xa3;Q\xd8\xbfR\xedn\xe3\xb96\xed?lY\x8a\x9cdK\xdb?\xe4\x0c\xd9;\x08n\xc0?\xceu\x15q\x01M\xdb?r\xc0\x99\xde\x9b\xef\xc7?{\xa5\xf1\x84\xd3\x02\xc4?\xd2q\x95\xa2~$\x93\xbf=\t\xf2\xff>\x85\xeb\xbf\xd1V\x8dU\xcc\xa6\xd8\xbf\xb4\x19\xefu&\xda\xc9\xbf{O\xb24\x05\x90\xe1?\x92\xa4\xb02H#\xb4?\xe5\xee\x9f\xafs\x10\xf2?_\xcd\x01\x8e\xd3E\xfc?\xfb\x83\x1fW\xae\xb2\xea?\x9diBe\xf7\xe8\xe8?V\x9a\xf7\xabkW\xde?D\x13\x8el\xc2\x04\xdc?\x05>\xb3n\xa5\x15\xba\xbf\xe3\xa3\xcbm\xc7Z\xeb\xbf}\xdd&\xee \xd5\xc1?\x13^\xc3\x87\x8bd\xe1\xbfeI\x9f\xf1@\x15\xe8?\x9a\xf6\x0b\x15\xcf_\xaa\xbf\x12\xd8\xb7\xc4\x05\x8f\xda?\xa1dN\x89\xb4\xe2\x87?%\xf6\np \xa2\xeb?\xf3HL^ok\xc2\xbf[]\x1b\xbcG\xbb\xbc?\xd1#NW\xc2L\x9b?\xfaGi\xfe\xbcJ\xcd\xbf\xb9\xab5AL\xe0\xe8\xbf\xb2\x94\xbc\x93\xc8\xcf\xed?>\xb5\x02m\x9e\xa5\xd8?\x7fN\xc4\x81\xd5k\xf2?\t.rV\xc0\xe0\xec\xbf\x9e5\x15b^\xe2\xf9?\x15\x85\xe7\x1e\xf9\xe2\xeb\xbf3\xdc\xc4\xcd\xf5\x0f\xd6?\x9c"\xb8,;\xc9\xe6?\x01\xda\x82\x013\xa6\xe8?\xdb\x8f\xc3y\xc6@\xe0?\xcfa3\r\xb4@\xea?Zo\xa6]l\xa9\xe3\xbf\xd3\xea\x89\x0fX\xfe\xd3\xbf\xd8DB\x1a5\xc1\xeb?\xbfA\x0b*\xa0\xa8\xfb?\xae\xf5\x90p\xach\xe8\xbf\x8e\xb7i\xbf\xc4\x8f\xb1?D\xdcy\x1f\xfah\xe5\xbf\x17Ye\xce\xb2\xd8\xc3\xbf\x1a\x9a\x12\xb6`5\xc9?4\xc2\x12\xfb\x976\xe6\xbf\x17\x96\x15\xd0[\x97\xe8?5\xcdx\xaf\x9e"\x9d?i\xb7\xd8\xfc\xd8\x92\xbe?,a\x17\x03\xd0\xe5\xd6\xbf\xc4R\xc5-\xbe\xfb\xe7\xbf\xabz\xcf\xe2$#\xbd\xbf\xd2\x11\x14V \xb1\xc7?L\x08!\x1eVv\xec\xbf\x02_\xf18\x15\x07\xe4?\xef4\xf9f\x06\xdf\xf9?\x0eV|\xca\xfbb\xe5?\x05\xc1\xa0\xe56y\xe4\xbf\x7fYj\x82/\t\xe5\xbfcG\x829\\R\xe3?\xf9\x080\x19eZ\xe0\xbf\xd7\xb1\x15:x:\xe6?\x9d\ng\x07z\x85\xcf\xbf\x1a\xba\xe2L\xa8\xb2\xc1?\x8e\xfbo\x0fl\xd0\xd2?\xc0\xbb\xac\xfa\x7fP\xca\xbf\xb7\xb5\xaa\xbc.H\xf3?\xe0\xc4\xde\xef\xe5\x83\xde?PVk\xafh\xaef?Cz\xfe\x16~\x88\xe9\xbf\x96\xb1*\x8f\x97%\xa6?(\x05\xa20\x0f\x1f\xf3?\xcbGVp2\xee\xe6\xbf\xc8\xa6\xc3\xf1\xd6*\xc7?\t}\xaa7\xffG\xeb\xbfZ\x93\x01\xb0X\xe4\xd6\xbf\x0e\xf5\xad\xbf\x83D\xb0?b\xd0;\xee\x90\xcf\xe1\xbf\'\x86G\xfa\xf1\xe1\x9d?&\xdf\xbc\x18\xbbi\xe3\xbf|W@\x9c\x12\xe7\xe2\xbf\xf0\xe3\x11\xec\xa4\x14\xd7\xbf4\xd6\xfb\xb4O\x15\xe8\xbf\xeb\xff\x8b7\xadB\xbc?\xd7\xd7\xd6\xaf\xc1\xd1\xe2\xbfi\xe9\xd8uj\xc8\xf7?\xec(%\xcf3\xf0\xc8?\x99\x10\xda\xc9P>\xd1\xbf\x909\xbd\xe9Lq\xd9\xbf\xc4\xb0\xfeh\xe17\xd4\xbf\x98\xab\x17\xbe!{\xcb?\xf4sS\xe6-\xe4\xa0\xbfc\x0e\xa6r5\x1f\xe0?\xc5FM0\xb3\x91\xeb\xbf\xf7\x07\xf0\xb7\xb1k\xe0\xbf4=\x08\xe9i\xd7\xe7\xbf\xa9\x92A6\x9b\x0f\xe8\xbf\xa1\xb3rD\xca-\xf9?\xc9>t\x15\'3\xe4\xbfP8I\t\xfb\xec\xe5\xbf7\xe9n\x13\x03\xa4\xe9?\xfb\xb4X\x84yy\xe8?_\xf0\x07\x15L\x13\xe7\xbf\x82\x91\xdf\x0b\xd9G\xd6?\x83\xc6\x16\xb7mO\xaa?h4\xbag\x9bf\xeb\xbf\r\xbc\x07\x81M\x98\xe9?\x86\xcfG\x84\xbe\x86\xbb?0\x1bP\x1a\xce\x95\xea?\x87\xe4\xe7\xa5H\xcf\xc9?Y\xe0\x949\n\xf4\xdf?\x19\xe2j\xf0J\xc5\xba?/>}\x7f\xaa\xa3\xb0?\xd8\x1d\xfb\x98\x0c\xe8\xf2?\xd3\xcb\x154X/\xe5\xbf>US\x04%\r\xc0\xbf!\xbc\x14\xc3~\n\xe8\xbf\xa95+p\x10\xb9\xea\xbf\xd2\x1f\x10&\xba\x12\xd1\xbf\xd9sx\xb0\xac8\xef?\x0bL0DK\x13\xd7?|\xf6C\x91\xf0\x00\xd4\xbf\x8f\xe6a/\x81\x1f\xc7?Fo\xfd0{\xa0\xb4\xbf\x06\xb0\x10.\xba\xb6\xf0?\xa9\xd7\xc18n\x97\xe0\xbf\xb72?\xe8KF\xd7?\xb3RY\xbeX`\xe0\xbfX fJ\xf8]\xa3?\xdcc\xb8`\xde\x15\xe4?\xe5h"\x1e\xd1\x96\xf0?\x87\x7f\xe4\x18 <\xd2?2u\xde\xe3u\x8c\xd4\xbf\xf9\xcdp\x03!Q\xd2?\xd4{\xdc\xbc\xd2)\xd4?\xb9\xe3\xf6\xddf\xd0\xd5\xbf\xaa\xfa\xe0\x9d\xf4\x01\xd3?(\xd7\xdf]\x94\xd7\xc6\xbf\x08\xcd\x1d\xf1D\xa8\xca\xbf\x15\x93<!\'\xfe\xdf\xbf\x91D\x8b\x00(\x94\xdf?\x0e.\x05\xc0\xf9\xfa\xad\xbf\xb6\xcf\t\xab\xf8y\xe9\xbf4\'\x1cO\x06\xb9\xdb?V\x7f\xa6J\xadY\xa5?q\xf0\'T\x87\xfd\xe1\xbf+\xb7\x91\xaf\xcb\xdd\xe2\xbfEa\x04\x91\x80\xea\xc9\xbf\x9a\x92i\xfc\xf3\xfe\xe4?U\xbe\x1a\xdf\xb2\xb2\xeb\xbf>\xf9G\x98\x92\xce\xbb?\xf9~F\x01\x1e\xad\xe3\xbf\x15X\xc7\xb6aQ\xbf?\xf2\x8b3\xa3\xa4\x9f\xd2?\x11!\x0e\xba\x8bN\x99\xbf\xf3\x0fgx\x1b\x16\xe7?\x8b\xd3\xb1\x10\xb1.\xe1\xbf@\x10\xbc\xc7\x87\xb6\xbe\xbf\xe6\xddn\x0f\xfd\xd0\xd7?\xf6;\xb2\xe2r\xad\xd1\xbf\xfeo\xde\x93\xa7\x8c\xe8\xbf\x02\xa0\xdc\xb0WI\x95?\x12,\x06\x0c\xa6{\xb3\xbf\xec\xc1\xe1\xd6\xdeE\xab\xbf\x07\xb0\x84aX\xf8\xea?l\x95\xb6[S\xbf\xed\xbfT`m\xa5V8\xe2?\xad?+\xab\xa9\\\xe7\xbf\x8a\xa3\x1b\xc2T\x8f\xdf\xbf\xd5\x07\xf5\xb9\x83\x86\xe7\xbf_\xd8\xa7\xcbG\xea\xe6\xbfX\xf1\x03oH\r\xe9\xbf\xc9=5kv\xbb\xb7\xbf{J\xa9Qf\x15\xbb?\x87\xf1\x9f\xce\x04Y\xf3?4\xf9\x86\x9f\xeee\xef?\xfd#\xd9\xfc\xd8\x94\xe4?\xd0@\xd2\xa4\x1a\xcb\xac?\xa1\xce{\x00\x0b\xc9\x8f\xbf\xec[V+\xe5\xa4\xcb?4\xf9\xc4=\x8c\xd0\xf1?\xce\x86\xc5\xeeD\x81\xd7?\xeb\x9d\x84\xc10b\xc7?\xb2.A\xbb\xa3z\xb4\xbf{\x00Ot\x8c\xa2\xc8?\x9eR\xfb\x9c\xa0\x11\xd2\xbfC\xe7:\xfah\xb7\xf4?\xf0\xd2Q:\xef8\xbe\xbfQ\x90T\x83\x87)\xe3?m-\xea\xe8\x87F\xc5\xbf\x18\xe7\xb4\x95\x17\xe2\xd0?\x02\xdd\xcb\xa3\xbd\x9c\xbe?\x91q\xbe\x8e\x13\x94\xa6\xbf\xb7\xda\xca\x92\x13\x88\xe1?K\x03\x1b\xd8\x0c\x04\xdc\xbf\xf4 \xb3\xe5\x98*\xe7\xbfzx\xa9\x99u\x1e\xcc\xbf~[)B\x1a\xad\xe7?Qv\xd6w\x9d\xd0\xeb\xbf\x86Lk\xa1\xe9\xae\xea?x\xf1J \xde\x8c\xe9\xbfr\x07o\xf6\xba\n\xe1?\xa9\xf5\xa8\x1b\x9d\x10\xb3\xbf\xa5\xf9\x17\xb9\xb0\x05\xbd?z\x90>0\x99\x1b\xc8\xbfY\xb4\xd61A\xf6\xe3?h9\xc8:\xf3\xb0\xd0?\xe3\x00\x99\xa9\x89w\xe7\xbf\xe4oVw>\x04\xc9\xbf\x07=U9Xz\xf3\xbf^\x90\x93\xd7\xff\xb8\x84?\xee"z\xad\x13\xaa\xe8\xbf$S\xa6\xb3\xf3a\xde\xbf\x04\xc3\te~\xd9\xa3?\'\xe6\xcd\xe5\x87]\xf0?p\r\xcc\xe6\x90\x1e\xe0?ZGL\x87\x9e\x0e\xac?\xefN1\xdd*\xdf\xcf?\xc9\xd1n\xb4\xbaR\xdd?\x98\'\x91\x87V\xe5\xcc?J^3\xbb\xec\xdc\xdc?\x10]\xfa\xd3\xe3\x9e\xde\xbf\x04\xdb\x93\xec=\x0b\xf3?\x07\xf2\xae\xfdCg\xaf\xbf\xfb\xcepR(d\xee?4\xd4T\xe8\xf3b\xea?(/U\xe8\x11C\xd2\xbf"\x0e\xc89\x0e\xe4\xc2?\t\xa8:\xd3Y\xe6\xd3?>\xfc\xe8\xdf\xcc\x04\xbf\xbf?\xff!\xa9\xeb>\xb0\xbf\xff\xb6O7\x99\xd8\xea?\xa1\xfd\x98{\x10\x7fY?\xb0F\x1a\x97\xa6\x8d\xc2\xbf|Y4Y\x08*\xe1\xbf\xb2\xc8\xf3ZW\xe6\xc8?D\x8b\\\x91\x1d\xa0\xe5\xbf\x93\xdeREi\x98\xe0\xbf7>Ez\xb4\x1d\xcb\xbf\x05\xef\xb3\xb3,\xb2\xbe\xbf\xe9\xafR\x15\x1c"\xae\xbf\xf2\xfd\xc5\xf5\xd9\xf5\xb4\xbf\xe7\xa5Qm\x8c\xe3\xe2?\xef\x88gB\xfd\xf0\xdb?W\x80_\xd7\xaa<\xe3\xbf\x830^\xc0\xe8&\xc9\xbf\xb1\xfeV\x05+\xf8\xf7?f\n\xc0\x80W\xc0\xe8\xbf\x82d\xce[\x1eR\xd6?\xc8b\x10\xf0o^\xf5? N\xe64xr\xe4?6jb\x974\x15\xc6?\x04P\xdf\xd00\xf9\xea?0\xd3\xf3G\xb04\xc8\xbf\xf7\xba\xe5\x16\xbd\x1b\xc9\xbfd\x0e3\xe7*\xde\xd1?\x12\xc9k\xb9\xb2\xc3\xc7\xbf[\xd7\x00$\xb2V\xe0\xbf\x94\xe9\xb7aAt\xe1\xbfJ\x1d~\x8f\r:\xe7?6\x80@\x91=\xc3\xd5\xbf<\xa1A\xc7\x079\xcc?\x15\xb9P\xcb\x8dD\xde?\xa2\xf7\xa5v`\xd0\xe0\xbfx\xd8\xe8>\xdb\xa4\xe1?\x1c5\xe7\xfb\xd2)\xc6\xbf\x9d\xf1\xb8\x02\xf6T\xe6?\xc9$nz59\xe2?\\X\xa2\x89<8\xe3\xbfA\xb80\xfb\x12\xbe\xa0\xbf\xff\xeb\xbdI\x9a`\xd9\xbf?\'D\xfd\x16\xab\xee?\xe5\xf7p\x9a1\x83\xae?J\x9d!\x12s/\xbc\xbf\xc3\xcd\xe4\x86\xbd(g\xbf\xce\xc7\xfb\x03\xc4q\x96\xbf\xd6\xb8\xd0y2\xeb\xc1\xbfX\x19\x1f9\xb5\xd2\x8e?\xb2\xec\x8c,n\xe4\xb6?\xc5P\x84\xc0\x1e\x99\xc5?\xf1L\x8b\xa4n@\xe5\xbf\x16\xa3\x0c]\xf2z\xd5?B\xa1]\xd0J\xe6\xdd?\x91\xd1\xa2\x12q\x8d\xe8?\xb6\x9dX@ \xd7\xf0\xbf\x98*\xcb\xb40Z\xe3?\x86\xaa\xa8\xf1\xe2\xd7\xe8\xbf1\xacb\x81\xf8S\xdd\xbf\x16\xde>\x11kk\xf8?\xe6`\xfdJ\xca$\xd8?x\x12\xa3\xf1\xc3d\xc6?4\xa7\x18Dt[\xce?T\xeb\n\x8a\xedr\xe3\xbf\xb2\xfa-\xfc\r\xd8\xae?9,h\xbcd\x7f\xe1\xbf\xf4\xf5a\xedI\xe9\xe4?\xa8\xd1\xec\x17h\xe4\xea\xbf\xd8\xd7M\xfa\xf8\xf7\xca\xbf\x0c\x0c\xc0\x9c\xef\xc7\xe6\xbfs-49(\xdd\x93?\xd6\x98\xd3ou\x92w?\xcc\x0b9~)\xb5\xe7\xbf\xcc\x91\x12\xff\t\x88\xe5?7\xfb\x92\xf1&\x17\xae?vo\x062+\xda\x88\xbfy\x14`\xda\xc6\x9d\xe5\xbf\x83u\x15\xd3XP\xe8?\xf5\x97\xdd.\xebK\xb9?\xa1y\x8et\xee\xc0\xe5\xbf\xf8B\xd1\x9c\xbf9\xe3\xbf\xea\xf9\xd2(\x17\x11\xdb\xbf\xa2m/W\xf1\x97\xea?\xcc~)H\xfa\x04\xe8?\xd5\x8b3^\xf14\xe4\xbf\x18\x0c\x91\xf7q\xe6\xe7\xbf\xfdY\xe8\x04\xcar\xf8?`|\xdc\x1ee\xe1\xe0\xbf\xa3D|\xc9?\xf5\xc8?\x15\xa2\xd4\x85\x85\x14\xb3\xbf\xcb,\x84K\x19\x17\xbf\xbf\xfd\x01\x89@\x9f\x96\xdf\xbf\xa4\x8a\xb6A\x95\x9a\xe6?[\xd6\xfb\x00o\xb5\xe7?_F\x0c\x1d%\xee\xed?m\x8e7F\xd8\xa4\xe5\xbfJ\xd54\x9aYy\xea\xbf\xe0%\xf4K\x8a\x07\xee?\x11\xb2\x91IY\xc4\xd4?\x00,\xf3\x9e\xc4l\xe1\xbf^\x04\x7f/b:\xcf?\x1cBz\xcfiE\xcd\xbfqe\xde\x7f\x14C\xb0?\xe7\xf6\x81/\xb0\x81\xf0?\xabD\xfa~\xbfi\xe5\xbf\xbaIWH\x1c\x1d\xd6??\x1f\x18\x81\xcd\x8b\xdb\xbf,\xb5\r\x80\xec9\xb7?.\xe3\xf3z\xeb\xf4\x8d\xbf/\x1a\x02\xfeV\x0f\xe8\xbf\x1fL:`\xe2\xdc\xd5?$\x11\x93ns\xfe\xe7\xbf\x06!\x95\xc2\xd6\xa1\xdb?8\xc0y\xb2\xff\xbb\xd0?HZ\xd9\xdd10\xd6\xbf\x9a\xad\x1b\xbb\xea\x93\xdf?g\x95\xe1-&\xb2\xd0?G\xc2WS\x05`\xd7?\x0bO\x92\x1d\x18\x10\xe0\xbf*d\x8eT\xfd\x13\xdb?\xf5\xeb\xd8\xe7\x01\xf8\xd3\xbf%l\x0b\xefq\x19\xaa\xbf\x96\xfdCx\xc14\xdb\xbf\x99}\xc1zVm\xe5\xbf\xf6\xb0\x08Z\x19U\xf4?\x813\xd8\x0b\x85M\xe4\xbf\x1be:\x08<3\xe8\xbfX%\x14|\xfa\x82\xe8?\xad&\xa4G\xef\xb8\xd6?\xb9\xc1\x95\xa6\xc8\xfe\xe4\xbf@\xae\x9b}/N\xb5\xbf|\x8a\xda\xdd\xaa\xc2\xd9?\xcck44R\xa7\xeb\xbfq\x0c\xcc\xaeP\xb8\xd4?\xe5\x92\xcat\x17\xba\xe5?e+\xe6[\xb6\xbe\xe2?\x07\x7f\x7f\xe0\x16r\xe3\xbfG?\x05L\xdb-\x97?\x0ft\x0e\xd6o_\xe9?\x02/H\xa5y\xdd\xb8?\xd0\x02\xb2\xcf#r\xf6?\x01\xe0\xfaI\xcc!\xe5\xbf\x01\xd7\xfb\xc9\xb1\x80\xd7\xbf\x87\xc9\x02d\xfc\x84\x98\xbf*\x18\x11{\xb6\xcd\xdd\xbf\xc2\xbaJ\xc9\xd9\xe6\xe1?\xa38x\xcb}l\xda?(\x80\xd3\xba5|\xde\xbf\x1d\n\x7ff\xd0E\xeb?\x0c1\x8c\x8dZ0\xdb?Qc\xbb&/\xaf\xb8?\x08\x14Zzf\xdd\xdb?\xa9\xa0\x16\x89\r\x07\xde\xbf\x19\x1ebb\xf4\x16\xdb\xbf\xde(V\x8f\x01\xad\xe4?{7\xf4\x16"\xd4\xb3?\xa9D]\xcey#\xe6?\x9d)H\xe2\xf4\x04\xb8\xbfU\xdd\x02\ng\xd8\xb9\xbf\xdc<\xa8\xf4\xf6W\x86\xbf\xc5\xa3\xd8a\xafe\xe5??E\xc6t\xd1\xff\xce?(\xe9\x13\xb3w+\xd0\xbf\xdf\xf1\x1c\xbc_\xa4\xdd\xbf\xd51\xb3\x96\xfd\x0f\xd7?)\x99\x7f\xce\x11\xe2\xe9\xbf\x9c\xa8\xdc\xdd\xf6\x97\xe4\xbf\xfc!\xeaD\xa0;q\xbf]Si\x97\xfb\x82\xbc?2B|D\x95\x8f\xe6\xbf5@\x89\xe4\xd1j\xe8\xbf\x87\xb3\xb5yq\xdc\xd3\xbf\\^x\xa6(t\xdb?\x12\xad\x9b;)\xc0\xe1?\xb2z\x7f\x98h\xab\xc2\xbf\xfeHH\xd4\x04\x80\xd8?\xb3\xc1\x9blL4\xec\xbf\x17\xf74$\x9a\xba\xdd\xbf{l\xfb\xb6\xdda\xb8?\xec\n"Z+H\xf0?\xd5h\xfd\xb0\xaa\xec\xa4?\xa8M\xde\xe9>\xa6\xd6?\x14\xf4\x97[\x8f`\xf3?\xa0\x04\x1b\xbdCy\xe2\xbfh\x8d\xb8]}~\xe3?\x80D8\xf3\xe1I\xb9?(\xb6\x8e$\xdd\xd2\xf7?*\r(\xa0Rx\xe9\xbf\x84\xc0\x8eA\xd9c\xd5?Io\x83\x1fV\xb9\xbc?\x1d\x9a2x\xd0\x19\xc2\xbf\x01G\xac\x19aQ\xf0?\xc2\xeaNm\x131\xf0\xbf\x96.\xe2Z\x8e\xa3\xc9?\xfbo\x16\xba\xd1a\xe4\xbf7)C7\xdb}\xca\xbf\xe6=U@\xe3\x95\xca\xbf!\xffT\xfb\x97\xc7\xdb\xbf\xf4m\x00q\xdd\xcc\xea\xbfgNm\x95\xd5\x18\xda\xbf\x1e\xe2V\xdafE\xcb?+\xd8\xa0B\xf5\n\xd5?\xcc5F\x10\xbe\x0e\xea?\x0f}2\xcb\x82"\xea?\x94FNBvy\xe8\xbf\xd2\xd3y+\xcba\xe9\xbf\x85\x8d$4A\x85\xc4?{\xe8D\x81\x81O\xfa?\xbe\xc2\x0c\x99\x1fV\xb1?\xb7Z\xc6\xdaV\x10\x93?@R\x7f\xaab\xe6|\xbf6\x94\x8b\xde\xf2\xf2\xa7?/\x003?*x\xe1?\xee\x7f\xfdq$\xb8\xf7?b\xab\xb1>nO\xd1\xbf\xb9+\xe0\xd2\x8br{?\xda@\xac\xf3\xeba\xa7?\xd2\xd7\x1f\x82/\xdf\xdf?p\xe0\x8d\xc0\xc0\x99\xe2?iO\x81\x18\x12G\xcc\xbf\x07H\x04\xdf7?\xf7?\xc92\x1b{\xf5_\xe2\xbf\xbe\x9f\xc7;\xab\x00\xe7\xbf\xe2?\x98l\xbc\x99\xea?7h\xf6\x05\xf7\r\xeb?\xe3VPn\xe6{\xec\xbf\x83\xe2(\x1el\xe5\xda?\\[#\xdd\x9by\xe7\xbf\xe8\x81\xbd\xcd~\x99\x98\xbf\xef%\x92\xf7\x00\xa5\xd0?5*\x12M\x12s\xc1?h\xa2#\x14$\xa3\xb7\xbf/\\^]/\xe6\xf1?R\x0eq=\x93d\xe5?\x9au\xfby\x9fI\xe7\xbf\x06\xcb\xd3\'\x1c$\x9b\xbf\x99\x13\t\xf3\xdd=\xf1\xbf\xa2\'\x7fT\xcc*\xd8\xbf\xb3\x86^M\xf4\xa9\xe1\xbf\xfe+i\xb5\xab\xcf\xe2\xbfi{*\xbc{\xd8\xee?k@\xd3\xa4\xfd\x81\xe1?\xd6\x02\xfb\x87\x05\xa8\xdd?\xa3\xe9am\xe2x\xdb?\x8dEp\xa3\x0bg\xd8\xbf;\x1f0\xa9\xfb\xcf\xce?tu\xc9\x8c\xa3\x05\xe3?\x87|\xf8_\xd6$\xe3?\xfd\x0b\xa8\x9d\x85\xb0\xdd?\xecE\xfa\xe5\xedn\xb0\xbf\x0e\x9dn\x83\t\xbb\xf4?\xd9\xb7\x8d\xb8g%\xf8?\xe8\x97\x9c\xfc\xcc\x10\xe7?\x83\xf8l\xb6\xd2X\xe3\xbfH*%\xdbQ\xc7\x95?O\x01\xf6i\x84R\xc2\xbfd\xfb\xee\x01\x89\xba\xcc?\xfa\xfd}\xbdX\xaa\xbc?`\xc4\xa2!\xe5!\xe4?\x06\x16\x0bO\x8e=\xc9?\xf2\x9b\xa7U\x8e$\xc3?\x87\xcf\xf1,\x8eb\xdd\xbf\xb7$&MQ\xb7\xe1?\xc9~\xec\xd5\xc9b\xe6\xbf\xc0\xc2,\x8a\x97\xf6\xa2?\xe1\xec\xb4\xe8\xbc\x14\xe5\xbfH\xc9EV\xb8\xb8\xc7\xbf}&9\x92m\x92\xe0\xbf\xe5\x86\xc3\xe5\x02a\xde\xbf\x9e\xe3\xdd\xa2\x03u\xdc?\xef\xc5Y\x16S\xe7\xbb\xbf|\xc5b\xeb\x83\xab\xea\xbf\xdf\x12\xdf\xc8\xb4\xcb\xe0?X\xbaF\xd5\x07\xc2\xf1?9b\xd36\x9d\xf5\xe5\xbf\x93\x1c\xccTsm\xec?\x847\x07m\rT\xf3?\xbe\x95\xce\xcf\x7f"\xe0?\x9b~\x96x\xe4z\xde?\x07\x84\xb8,\xd2d\xe7? \xbeh\xe4\xc2\xf5\xdc\xbfHd\x0b_m\x90\xdb\xbfc\xd9\x117\xde\x10\xd4?9\xe9A\xe8\xbb\x18\xee?\'\xb3\rO\xc3p\xd8\xbf\x00}\xd5\xa9\xf6\x10\xe3\xbf\x9fF\x98\xcb$\xcb\xd7?j\xc1\xda\x0e?\x10\xd1\xbf\xed\xb3[\xce\xe1\x08\xe2\xbfu\xad\xb4N\t\x7f\xe1\xbf\x19\x90H\toC\xe6\xbf\x93j\xe9Y\x84\x19\xe0?\xd7|rS\xd9\xd2\xe0\xbf\xc9X\x89\x85\xf5@\xe8?T\x18!\xb0\xab\x8f\xf0?a\xf4\xa93\xe7\x01\xcc\xbf\xdd\xc0jrl\x91\x8e?\x84\xaf\xbc/\x96E\xe1?r\x04|c-\x86\xf1?V\x8dbm~N\xcd\xbf\xf6 \xc4\xbf\xfb\t\xd0\xbf\xd0W\xbd\xe9\xaf\xc7\xd1?S%\xc1\x9a\xda\x17\xe8\xbfA\xd8\x98\xaeY\xb7\xb9?\xa2U\x8f(t\x1f\xb7?\xcb\xfd\xe1\x0f\xc2P\xc1\xbft\x13sr\xaa\xde\xd3?eG\xb8\xee\xbe\xbe\xc3\xbfc\xcf\xaf\x9fi7\xe1\xbf\xd1\x14\xe3\x86DY\xd2?\x8c \x88C\xf7\xf1\xd7?J\xe4p\xf6v\xdb\xe7\xbf\x86H6\xeb+\xce\xd2\xbf\xd05\xa4\x98\x11\r\xd5\xbf\xb5\xae\x80\xccf\x80\xe4\xbf\xa2\xca\x13n#M\xf4?\xf8\xb1\xb8/\xfd\x00\xb8?\x16Q[Uq\xbd\xb4?1\xd4\xf2\x81/k\xa2?\x1d5\xc2\x9b\xa7\x7f\xe2\xbflz\x9boY\x92\xc4?\xe8\x11\x94\xce\x8b\xcf\xe9\xbf\x15 lZ\xd01\xdd\xbfa\x8a0\xa6\xe6W\xeb\xbfI\x91\xcc\n\xee,\xd4\xbf\t\xbf\x96\x01j\x95\xe7\xbf\x1f]Iw\x89\xfc\xb2?W/Y\xdc\xf9\xfc\xc9?\xbc\xc5\x8b\x16\x0e\xdf\xe7\xbfj\n\x17\xeeI|\xd9?\xe1\xe25\xffL\xf6\xc7?\x87V\xa1G\x8e]\xd6\xbf\x00\x87\x98\x00\xf8\xc7\xe6\xbf\x9b\xb1\x99\xfeo0\xf0?\x1b\x17J\x12\xf8\x92\xd5?4u\xd5\xb0\x0c\xf9\xeb\xbf(\x0e\xed\x10\x8f\xe2\xc0?\xd2\n\x89\x18E\x06\xea\xbf\x02/Guv\x0c\xd0\xbfr\xdaA\x9f<\x7f\xef?\x82~\xeej\x01g\xca?\xd2\xa6\x03\xd8\x81\xbb\xe8\xbf^\xe7l\xa6\xc9\xe9\xe8?2\xbcy\xc9\x90\tV\xbf\xf7d\x01\xaf\xc7w\xb6\xbfv8\x94P\xf1\xb7\xd8\xbfw\xd2\x87\xdf\xbd\xf4\xd2\xbf<\xfe\xde\xc3:s\xe3\xbf\xb5\xf2\x14jY\xac\xf2?\x97Y\x81\x98\xf7S\xa4\xbf\xe1\x92\xa5\xd4#\xf9\xf1?h\xe9m\xa9,A\xe8\xbf\xae\x97\x9aR\x0fX\xd5\xbf4\x1aI~\x8d\x85\xf8?m\x8c\x88\x15\'b\xe5\xbff\x1a?\x12]\xdb\xe6?\xc3\t?k\xed\x92\xd1?._\xca\xcfk\x13\xeb?\xd2\xa0\x80\xa1\xf9u\xdb?z\x8fn\xe0=\xa2\xf9?\x1fI/\x80`N\xdb\xbf\xe1\xe0\x04\xc0g\xbc\xdd?\x03L\xc44\xb4\x9f\xd4?\xef\xd0\xb5\x1913\xe8?\xdbE+Z?\xd0\xe2?\x89\xee\xd7\xeeU\xfc\xe6\xbf\xc5h\xe8\x95q\x84\xd8?\x0b\x92g\xd6Z\xe5\xe0\xbfK\xcf\n\xcf\x0c\x8a\xd2\xbf\x01\xf1n\xe2\xe3\xae\xd5?\x86\x7f\xc6(\x9f\x94\xc2\xbf\xdbP\x96\x97;\xe1\xea?%\xe6}g\xee:\xd4?\xd8[^\xdd\xbd\x8a\xe0?\xc1YI\xf3\x9au\xe0\xbf\xd1\xf5\'0p\xf3\xd9?\x97\xdbI\x92\xb21\xec?s\xf7\xe8C.\x86\xe3?\x9c\x9f\x98n\xd8\xec\xd0?\xad\xe8\x17\xd5\xd4\xa9\x95?\x8b\x9f\x9d\x1b\x9fn\xde?\x88\xb9\x11s\xd5\x01\xb1?\xc3\x82{\xce\xf7W\xe7\xbf\xaa\xc9\xa4\x8f[\x13\xdc?=\x9e&\x9c\x06k\xa8\xbf\xa5Gib\x93G\xc2?GD\xb4\xf2\xc9L\xe2\xbf\x89\xf7\x06|*\xb0\xdf?c\xa5\x1dI\xabg\xeb\xbf5\xf2\xda\xa3m]\xd5\xbf8\x87\xfe\x84E \xd6?\x8d:\xb9.\xe9M\xaa\xbf@W\xb76\xfc\xe5\xe5\xbf(\xf4\xa2\xc2\x10\xca\xd6\xbf\x949\x86\x9e\x8b\xa7\xe6?\xc1,V\xb3\x10\xe0\x9a\xbf\xc1<\xe1\x08\xcc\x00\xe7?\x81\xdb\x82\xf1\xd3}\xe2\xbf\xe6$\xb3\t\xedA\xd9?O\xdf-\xfbO\xc4\xe6?\xc2\xc7\xac>\xfb\xee\xdd?\xfd\x1a\x94\x0cH\xaf\xf0?\x1e\n\xb9\xf4\xb9T\xd3\xbf[\xee|\x07\x98J\xe0\xbf5\xcb\xd1\xdcj\xf5\xf8?\xbc\xa8],\xf5\xf7\xdc?\xdb\x13D\xcc\x1b\xbb\xdc?\xc3\x01\x9a\xcb\x8bD\xd6?\xbf\xfd\xf3C[\xe8\xd0\xbf($\x84\x00\x82r\xe6\xbf\xcfT\xc1\xe4\xbf\xcc\xfc?\xa6\xd5\xb8\xe6p.\xb0\xbf\x08\xaaf;\x1f{\xf0?\xe7\x11\x9f\xaa\x19\xe9\xe0\xbf\x93\xaf\xfd;-J\xd5\xbf\xc6\xbe\xb8g9!\xdd\xbf\'\xe9/\xaf\xd9`\xeb?\xbfc\'1\x98g\xdb?\xb5\xe0s\x9e.f\xd6\xbf5\xc0?\xc6\xcah\xf1\xbfJ\x85\x87\x16\xfe\x7f\xe8?U\xc9\xd5\xf9\x8a+\xed\xbf"\x1b\x94\xae\xc0\xdd\xd9\xbf\xbf\x9as\xea\x9b?\xe4\xbf\xcc\xf3.7}r\xcc?\xef\xf8\xb34n\xb4\xad\xbf\xd5\xf8\xc2\xe2\x07\xe9\xed\xbf2\xb9\xe3\xc5n\xd9\xdc\xbf<\xc1\xe7|T\xf9\xec?\x94\n\x16\xb11\xb7\xf4?.-|\xe4u<\xda\xbfC\xb7\x8d\xbb]\x1b\xc6\xbf\x16\x03+H\xa98\xea\xbf se@\xe8\x00\xe4\xbf]\x1b\xab\xc7=K\xf8?\xa8\x8f)\x1dp\x14\xf2?\xc5\x0c[\x9fQ\xab\xda\xbf\xea$\xc5V\xc7\xd3\xf2?HGr?\xa9\x87\xd5? \x91\xc6`wk\xe1\xbf^^\x81=\xcc\'\xdf?G\x07`\x92\xa0J\xc7\xbf\'2\x94xK\xf1\xf6?#\x04\xb7\xe4\xd9S\xe8\xbf$\xa7\x01(\x00\x08\xdb?~\xe0H\xaf\xf5p\xd0\xbf+\x8a\xc1|RZ\xb0\xbfw\x8b,\xe7\xfb\x9f\xe4?\x8b}]\xca\xd5\t\xe0\xbf\x8f\xaf\xfa.a]\xe2\xbfG\xff\xa1\xc7V\xcc\xb3\xbf\xff\xe8\x13\x15\rA\xe3\xbf\xfe\xeb\xcd\x9a\x98\xfb\xd6?\xaboh\xee,\xf4\xf0?1\xfe|\xb2*\x97\xe8\xbf\x06\xe4#\xe9\xe2=\xe7\xbf\xe7UN\xe3K\xb5\xba\xbfQRd*\x16\x91\xef\xbf\x0b\xa5\xb2R\x07X\xc8\xbf\x04\xfb\xd3\x03\xf5\xe7\xdd?u(\xe2\x98\x8b\xfe\xeb\xbf{\x89w\xa8\xf4Z\xef\xbfcM\xbf9\xc3\x14\xc8\xbf\xbb\x08\x07W\xf6\xec\xe1?\x8d\xcag\x0f\x81\xcc\x90\xbf\xbd\x02[\xb6A\x80\xd8\xbfn~\xa5G\x8c\x7f\xd5?*\x9bz\xa3\xa0\xea\xcc\xbfT\x07\xff\x1cR\x0c\xe4?\xf4\'\x9b\xd4\x9e\x1a\xb8?\x02\xa2\x84\xb0\x02\xc5\xd0\xbfp!V\xfd\xb3\x0c\xed\xbf\t\x8eZ\x16q\xcf\xc0\xbf\x07\xaeY\xb2\x9dM\xd9?\x81\x1a\x98;\xcc\x8e\xcc?\xad\x0b=d{\xb2\xde\xbfK\'\xba\x98\xd9\x97\xf1?.\x96\xa4sP\xae\xe2\xbf\x9a~\x0b\xeb\xbc\x87\xe6\xbf\xa9\xe2Y\xda\xbci\xe6?\xbc\xc9\xd9\xa6{R\xdf?\x9fj{S4(\xe5\xbf\xd7\xd0w,\x9a1\xc6\xbfl\xb1/\xcd\x0e\x86\xba?\xcf#\xfd\x12\x12\x16\xe2\xbf-u\x9e\x07\xb7\xda\xea?\xd6\xa1\xf9\x1c\t\x92\xae\xbf\x995\x90\x85\xd6n\xb1\xbf\x96\'Q\x06\x8e\xd9\xe8?\xa99{\xab\xcaJ\xaa?P\xde\x95\xc4\xbf\x84\xe3\xbf7\xf9c6\xb3\x13\xd8\xbfC~J\xfd0\xe3\xb8?\xc5\x1c\xa7`N\x06\xd2\xbf\x91O\xe9\x87C$\xa6?xH\xc2\x11D\xbd\xe1\xbf}M\r$`\xd1\xea?\xcfM\xaf\x94d/\xde\xbf\xe2\x1f\x8c\x86G\xc9\xbf\xbf5R`\xbcs\x88\xb2\xbf\xcc\xba\xd5O\x8ar\xf7\xbf\x96\xb8:\xdb\xc0\xdc\xe2\xbf\xf7-+$\x92\x01\xd3?)\xba\xeb\xaa\x93_\x9a?\x1d\xba%\xfc\xe4\xd7\xf2?\xf1\x8az\x91\x17[\xe5\xbf}\xfc\xe0\xc0\xcc\xbb\xf5?\x87\x07G&p\x83\xea?#\x124oq,\xd3\xbf2\xb7\x0c\xbe\x01\x98\xd2\xbfG\xd6\xe2\xcd\xd5\xc5\xd8\xbf\xc5\xd6\xb7\xf5\xc8=\xef\xbf#Vd\'_^\xa1?\xa1:P\x8ea\x15\xd0?7vp\x85ky\xc1\xbf|4n\xcf+\x17\xd4\xbf\x1a\xcf\xdc\x12\xad#\xcd\xbf\xc1\x08\x11\xdch\x9a\xd6\xbf/\xc3uH1\x07\xaf?a\xcb\xfa\x89\xa9D\xe5\xbf\x04i\xc8\xb2,t\xf9?\xd0\x1a}\xf7g\xe9\xe6\xbf\x96\xda\x81\xed\xb8\xbc\xcf\xbfe\xb6\x95\xbd_[\xed\xbf\xa7\x0b{\xd4\xa4\xa8\xe6\xbf\xf6d\x99L\x92\\\xce\xbf,Iko+\xbb\xc5\xbf\x05\xb9#\xb8Z\'\xea\xbf\xadA\xffL\xcf\x04\xf0?B@\x14\x9a\xed\x90\xcc\xbf>D\xb5\xae\xdf\r\xba?\x17Y\x8d\x06\xb7\x97\xe0?Z4$\xed\xc52\xa2\xbfL\xe0\xf9\xf3\x14r\xd8\xbf5\x90\x13?\xbe\xad\xc1\xbf\x85~\xa3\xa8\xbf\xd2\xd5?\xe3\x02Jm@@\xdf\xbf\xb8\x892\x9c_\x10\xdc\xbf\xafS\xa4\x06Q\xf8\xab?\x886\xc8,3\xfc\xee?O\xcdd\xd9@N\xce?m\xf9\rZ\xf6\xb2\xe8\xbf\x9d\xc7\xf1o\xc0-\xe0\xbfq\x8ei\xb68\xa3\xd8?SF,\xd8\x08\x83\xf0\xbf#]3M\x1e\x1b\xe4\xbf\xfcw\x15\x0c\xb0\x9c\xe6\xbf^u\x86\xc6\xbb\xaf\xe3\xbf\xe6\xe5\x99c\x7f\r\xe3\xbf\xe0B\xcd\xf6\x0b4\xdc?\xa2djM\x92\x8f\xde?\xd9d\x12\xf1\xba\xf9\xe8?\xeb\xc1\xac\xdes\xd9\xd0\xbfC!\xed;B\x82\x00@c"v\x02d\x9e\xd9?\xbd\xc3\xff\xc3\x05\xed\xd0?\x81\xbc\x99\n7\xad\xdd\xbf*\xe1\x021\x80e\xcd\xbf@\xd29\x05\x8a\xc3\xee\xbf\xac\x94A\xe4\x1d\xb8\xdc?\x8d\x1b\x8aK\xa6\x1b\xae\xbf\xac\xb5\xb82\x0e\xe1\xa1?\xc7\x00\xe0\xc5;\xd9\xd8?)\xe1E\xc3\x0c\xcd\xf3?+RH\xf1\xd6\x89\xf4\xbf\xa4\xe2\x85dd\xca\xda\xbf^\xb3k\x88f\x9c\xdc\xbf\x85\xf5\x98\x93\x97z\xad\xbfmN\xf3k\x80\xc8\xe7\xbf\x11\x0e5\xd0\xf6\xab\xdd?\xd4*\xf4\x85\xc8\xd3\xe2\xbf\xa3=\xf4\xfe\x99,\xcc\xbfe\x07\x08u\xb4\xc1\xdf\xbfH\x07)\xc4yM\xeb\xbf\x07\x13\x1d\x03\x0bV\xc8?B\x81b\x1b\x81\xee\xe9?+\xdb\xceUv\x92\xd2?M\np\xb8\x06\x88\xe7\xbf@\x8c\x92a\xc1\r\xe9\xbf\xd1\xd2\xf8$*E\xe8\xbf\x92\x9f\x1e\xb8\xb8\xb5\xc4\xbfI\x83\xac\xe0r\xdd\xe6\xbf\xe2M@\xe7*4\xc9\xbf\xe0E\x9d\r\xb7Q\xcc\xbf\xac\xceJ\xa4\x00n\xe2\xbf\xc7R\xe6\x9d\x03\x90\xb1\xbf\x99X\xd6\xe6\xf0\x0e\x90?\xe7\xd7\xe1\xc0\xed\xc6\xdc\xbf\ri?u\xd5C\xe1\xbf\xe2qf\xd3\xd0a\xd5\xbf\xfb\x9a\xea83\x13\xc1?\xdc.\xaa\x83\x0f\xe5\xea\xbf5N\xe9\x86MH\xe5?NW\xb5E\x89q\xf1\xbfl\t\xf8$\x89\x18\xe8\xbf\x8d\r\x8a\xe7X\x04\xcf?\xa4\xb0\xa4[\xff7\xfc?q\x9d\xa8\xe3\xa4\x8a\xe0\xbf{\x1e\x92\x1e\xf6W\xf0\xbf\x02F\xecR\x8e\xf1\xeb?\x1f\x18\xb9\x9a!@\xe4\xbf\x9aI\x13\xf8\xbe$\xe6\xbf{\xc2\xee\xab1\x06\xc1\xbf\xb0W@\x04b\x1e\xe9\xbf9\xb6\xcf\xd3O8\xe6?C\x1c\x7f\xdbbf\xe1\xbfJK\xd0\x80\x83!\xe0?\x07d\xe6\xa0o\x86\xc9?\xe6t\xb3f ^\xcc\xbf\xc3.7\xd6H\xf6\xe7?\x86\x87%R\xbbh\xee\xbf\x8c\x05\x94Ut\xcd\xf6?\xae\x8c\xa5\xb3lA\xcf\xbfV\xed\x14\x1c\xe2Q\xf3?\xcc\xdb \xadU\xf7\xda?\xea\x8d\xbd\xa8\xc4\xd5\xe2?\xb8\xed\xba\xdfc\x00\xc6?\x8e)U\xde\x89N\xd5?\xcd\x14\x8b\x11<\x11\xeb?D\xd8\xb5i@\x98\xe9?\x94\x87\x85\x9b\x83\xd1\xde?\x84#\xf7\x0c"=\xaa?Vt\x1a RQ\xda\xbf\x1b3\x0c\x91\x12y\xd6?\xfd\x9djob\t\xea\xbfp\x0c!\x1dIB\xc1?\xac\x8aM\x1b\xccM\x91\xbfw\xd0\xe6\x17K<\xe4?\x10d4oZM\xc6\xbfQjf[\x89\\\xc2\xbf\xf8\xdd\xd76\n\xf9\xe6\xbf3\x96\x18#\xc2\x86\x7f?\'B\x94h\xb4b\xf2?\xc7\xefRB"I\xe3?\xc4\x0e \xe3\xc3e\xcb?e\x11\xef\xfd\xe0^\xf0?\xca\xc2C.\xf1\x81\xe7\xbf\xd5Jk\x17\xccP\xf8?+Yb\x0c\x9bw\xe2\xbf\xae?lc\xaf\xab\xe1\xbf\xf77\xa6\x99\n\xc9\xf0\xbf\xdf\xf8\xa1!R\x0e\xf4?\xd0\xf7s\\\xac\x05\xf0\xbf\xbc\xba\x9b\x08\x17\x19\x93?\xc4\xc9\x03\xb4L\xc2\xd4\xbf\xaa\x15f\x1d\t\x99\xf0\xbf\xa8\xbe\x9f@\x9e\xf5\x8b\xbf*-\xff\x04\x19\x93\xea\xbf(2D9_\xfc\xe6\xbf\xb2\xe8\xbdg\x9d\x1f\xe9\xbf\xe4\xb8{\xe0z\xee\xa0?\x80\'U\xba,=\xc2\xbf\x06\x9d\x95]\x9a\x87\xe0\xbf\x8f\x01$\xfd\x88\xfc\xd8?\'\xceu}\xa4\x14\xef?\x92\x982\xad\xd2i\xe6?\x16Y~[z\xb4\xf5?\xec\x9f\xeb\xf0\xeeb\xd8?\xaf#\xf6?\xc7p\xf0\xbfS\x92:\xbep\x03\xe2\xbf\x81\x11\xcb\x00\xbd5\xe6?Ei\x00\x1b5\xf0\x83\xbfg>\xd6\x80\\\xf0\xb9\xbf\xc5e\x9aO\xe0f\xe0\xbf]\xe0\xf5B\xc6\x0b\x9b\xbfi\xaaxh\xdc\x12\xf2\xbfFT-`\xbc\x82\xf1?>\x99J\xa9\x8d7\xc3? \xd7F7\xe0\xac\xdd?p\xd0\x1e\xf2\x97\xee\xe4\xbf\xd0\xa6\xf1#~G\xe2\xbf\x0f\xe3\x05k\x97\x18\xf0\xbf2(\x1f\x82\xe2U\xd6?PUz]\xd75\xde\xbf\xeah\xf0S.\x1d\xcb?\xbd4`\xc3\x00}\xf1\xbf\x08\xd3\xcb\x9a\x9f\x98\xb8?\x8c\x91\x12C\'\x18\xec\xbf\\Y\x18\xd5\xb2$\xae?\xcd+\xf5\xd1\xb1\xdd\xf1\xbf\x95\x80$\x1b~\x86\xa9\xbf\xa6Lj\x92\x84\xaf\xf0?\xcb\x98({\x81\xbd\xe7\xbfjn\xf4.\xa6\xb1\xc0\xbf\x18\x86\xce6a\xf0\xeb?7(X\x8b\xc1K\xf6?\xcf\xfe.\xcc2N\xb6\xbf5\xdeqi\x94\x0c\xe5\xbf]Q\xfel\xf8\xb7\xa7\xbff\xcd\xfb\xf4\x1c\xc3\xe6?\x83\x10b\xb8\xf1\x1d\xfb?\xf1\xb62p\x93\xa2\xeb?+G\xab\x90\x16>\xd6\xbfG/h\xb73\xae\xd0?m\x14\xc8\xed\x8d\x7f\xc3?\xb2\xf0b\xef/\x9b\xdf\xbf\xcc\x93\x9eP\xd1\xcf\xe2?\xc6\xe0\xb4\xce\xcbB\xbc\xbf@\x8a \xcd\xfcb\xd8\xbf\x7f\x00\xca\xb1\xd4[\x9f\xbf\xeb4P\x82X\xb3\xd0?g\xcb\xee\r\xd8\x87\xb7\xbfkL\x1f\xbb9R\x93\xbfhk92\x93%\xd3?A2\xa2\xf1\x8d\xc1\xd5?\xf6\x94\x0bt"*\xe4\xbf\xe2\xf7\x82\'r\x18\x91\xbf\xe2\x03\x07\x0cXj\xec\xbf\x19\xcb|\xa1A\x93\xe8?\xfb\xf1\xff\x0e\xb3\x8d\xf4?*zD\xd7\xf1\xa6\xe1\xbf\xdcmO\x9a\xd7W\xc9\xbf\xdf\x8b\xce\r\xc9\xa0\xd0?\xcb\xe4\xa4\xd5U \xea\xbf\xcd\xd0\xcb\xcax`\xe9\xbf\xa3\x18\xe2\xb8\xa1\xb9\xd8?O\x9elf+\xf1\xeb\xbf\xbaDP\x1cj!\xef\xbf\x00FY\x8a\xb3)\xe0\xbf\x18\x03\x9f\x8e\xd1\xc6\xe0\xbfD%\xe8vqS\xbc\xbf\xc5+\x92N\xe2\xae\xd5\xbf?:X\x9c\x10\x1a\xaa?\xb4\xbd\x9b\x9e\x9f*\xb5?\xf7w\xad|NE\xe9?\x9e\x9f\x8d\xda*\xde\xe7\xbf \xf0\xa2d%\x83\xc6\xbf\x85\xcf\xd4\xf8\x7f\'\xf2\xbfx\xcc\xf19\xb64\xa2?6\x06\x14\x0f\'\xc2\xd7?\x1e\xa6\x94s\x11\xb0\xde?--\xbe\xe8\xa1zH\xbf\xbf\x9eW\n\xeb\xd4\xd7?>\xff!\xc7\x91\x8e\xe0\xbf\xf6\xac\xae\xa2&\xe1\xda\xbf\x07$\x0c=v\x9a\xd2\xbf\xd8\x9a\xf8\xee\xe1Q\xd2\xbf1\xfd\xac\xf0\xa7h\xc2?\xb5\x15\xbd?\xb7\x89\xeb\xbf\xac\xa1\xd6\xcfK\xca\xf0?\xb4\xfe\x9d\x9e\xdb.\xec\xbf;\xa4\x1dm1\xdb\xd0?\x98V\xa6Ue\xcf\xcc?,\xf5\xa0B\xf4\xe9\xd5\xbf\xa1\xf5q\xa6\xbd\xd9\xa7\xbf\xfe\xe5+\xe0;$\xd8?\xbe\rb\xff{\xda\x9e?>\x92\x0e\x04N\xa3\xc2?F\xa8\x12\x9d\xfb6\xe3?\xdbI\x91\xc7\n\x83\xd2\xbf\x14\x12\xd8p\xaa/\xe4?\xe0\x05\x18n5\x04\xdc\xbf\x03\x8a\xb4so\xa7\xeb?\'\x1e\xb8\xd6-1\xec\xbf5\xa9q\xe1\xec\xa4\xce\xbf\x13\x85\x8e\x983N\xb3?\x83\x03\xafb\x7f\xb7\xf0\xbf\x1aR\xf3\xac*:\xee\xbfC\xa7\xba\xdc\xf1\xff\xc3?\xf5\x89+\xf8%\xe0\xbe\xbf\xd3\x93\x8b\x1a\x1d+\xf8?\x02-a3\x04\x0b\xe5\xbf\xe5\xe7\xc0\x83\xfe\xdf\xec?\x88\x0f\xfc\xf5ks\xc6\xbf\xf0\xb7\x98d-l\xe0\xbflGwP\xb8\xec\xda\xbf\xbe\n\x9c\xae\xa7\x9d\xd4\xbf|\x938z\x9as\xe8\xbf\x84\x0fk\xff\x02\xbb\xaf\xbf\x80\x02\xb3\xe3L\xcf\xcb?\xb6WCA\x9f\xda\xb0\xbf\xa8\xe7X\xcfl\x97\xb8?\x9b\xbcE\xfd\xcf\xee\xae\xbf*\xfd\x1cp\xd3+\xc7?\x05\xa3AD\xc3+\x96\xbfd\xa55\xa9\xf0\x89\xd3?}\xafo~\x93x\xf4?\x81\xe4R\xdb\xfa\x08\xe8\xbf$\xd2\x80Pl\xbc\xd2\xbfV\x0c\x02\xaf\x94n\xd5\xbf{\x87.<a;\xdf\xbf\xa1\xfdr\xc4\x90!\xe3\xbf\xe6\x11\xf8\xc29R\xdc\xbf\xb7\xe3S@\x97:\xe9\xbf\xed\xb9\xcd-\xb2\x87\xdf?\xbavS\x05L\xd3\xe5\xbf&\xb7\xf4\xbfc\x10\xf1?\xda\xbcS\x0f\xb6Z\xda?\xe8n\n\xceu5\xe9\xbf\xff\xd0+\xaf\xf6W\xe1\xbf1\x0f\xe6\xe7T\xde\xa3?gw7\xb3\xe1\x9d\xb1?\x00\x9b\xc4\x8f?0\xd6\xbfh\xc4;\x93\x83\xe6\xc7\xbfy\x14\x02\xe1\xe3\xf2\xb3?\x92\x17\x1c\x88\xcb\x99\xde?\x02P\x05\xc2>\xd9\xe2?\xf3\xde\xf6\xff\x03\xf7\xbc\xbf5\xc9\xd6p\xac,\xec\xbf?\xc1\xedy\x96\x8a\xc1?x\xb7\xe33n/\xee\xbfb\xb7:\xb5\xb1i\xe4\xbf\xa1\xf0\x9e\xf6 \xd7\xe6\xbfnpr\xb1\xb7\x84\xf6\xbfl|E0\xe2\x87\xe6\xbf\x88;N\x019\x90\xad?r?\x816x\x9c\xe2?\xa1s\xb4Di\xaa\xf0?\xe4q\xec\xa9\x8e\xde\xb8\xbf\x06\x81GG\xbe&\xe4?\xd5J\xe0\x01b\x9f\xd7\xbf\xebY\x9c))%\xc7\xbf\xcb\x86N\xfd\x8e\x97O?\xfb^\x87;\x9cO\xd3?\xd8\x00Q\xd5\x90a\xf0\xbf\xd5\xc7\x80\xbb\xabr\xe3?\xff\xd8\xd7\x00\xado_?{\xe7Y\x12\x1c\x8a\xc1\xbfX\xd7J\x9d\x92\xce\xd7?\x0e\xfe\xdb\x0fC\x96\xf2?T\x93\xee\xf6\x0e\xd2\xf3\xbf\x80\x0b\xd0Hgy\xd8\xbf\x82\x99s\xcd\xd0c\xea\xbfgzPx\xeb\xf5\xe3?\xb9\xbc\x81\xb8\x02\x90\xeb\xbf#\x10\xad:\x9e\xe9\xf5?\xa6\x81\xa6\xa4\xdcW\xe1\xbf7\xb8W1C\xb9\xe5\xbft\xc2\xfe\xd9\xa4(\xe4\xbf\x97\x17\x1b\xcebE\xf2\xbfSzm\x89\xd0[\xd0\xbf\x93\x81c\xbb\x91\x06\xff?\x98\xd6\xb9\xbc*\xbc\xdb?\xc2RK\xa3\'\x07\xe7\xbf\xf2?\x8a9hA\xe9\xbf\x1bf\xf4\xfe\x1e\xe5\xa4?\xb9\x0f\xc3\x08\xcfJY\xbf\x17r?B\x86\xe3\xe0\xbfvM\xb7\x84\x0b\x91\xcd?\x95jv}g\xc8\xc5\xbf\xf3\x05\xe7\xa9\xf3\xd8\xd8?\xde\xd4\x82z4\x1e\xd4\xbf\xd1\xb8"\x07\xf9O\xa5\xbf\xf6\xc7l\xd1}\x1c\xc1\xbf\xae\x9e\xc1\xfe\xea!\xb7?\x12\x0b\xd9\x9eP\x10\xdb\xbf\x82H\xc4R\xa0\xd5\xb3\xbf\x08\x96I\xd0|\xbf\xe7\xbf:\xcfT~\x80\xa9\xee?EO\xa10\xdf\x11\xe6\xbfL\xbd\xf2\xef\xff\xb6\xe8\xbf\x81\xb2\x19c\xca\xa4\xdd\xbf%\xf7\nH\xebZ\xf6?2\x19:\x94\x0b\x11\xe5?\xd2\xf4\xc4\x10\x9a\x88\xf0\xbf\tz\rYU#\xe2?#\xaf\xf6.\x80\xab\xe3\xbfw\x98\xc3\x13\x9b\xa0\xde\xbf\xb6\xe35\xb7\x18\xd7\xaf\xbfRm\xfe\x932\xa2\xe8\xbf\x18\n\xeb\xac`R\xb7?\x05\xd2\x01\x07\x08\x95\xe6\xbfA\xff\x1cY\x9fS\xc3?\xd2\xc9&\x19-\xb4\xf6?\xe4\xe8F\x15\x03\x19\xeb?\xeaf\xec\xbe\xdc\x8d\xcf\xbf\x1f\xae{\xcd\xd9\x8d\xee\xbf:\xa3\x04C2>\xf0?\xa7\xf5\x92\xe3\x17\xc1\xcb\xbf\xe8\xdd1\xde\x80\x89\xf2?"\x83\xaa\xaa\x10\xe0\xcb?\xd3$\x06\xe6n/\xe3\xbfN.\x00\x03\x02f\xec?Hi\xb9c\x10\x9c\xd0?\x16\xff\xcc>\x03a\xec?\x91E\xeaV\xb8\x8c\xea?\\~?Y\xfbO\xe2?\xc1h6\'\x94\xd2\xf3?\xb2Yf\xda\xf7\x89\xd7\xbf\x92\xfd\xd63p\xbd\xea?\xe4X\x88\xa3\x80\xcb\xef\xbf\xd6H\xfbaDm\xc1\xbfy\xb6~\xad\x94\x04\xd5?\xfb\xf0\x0e\x83\xed\xc0\xba?\x04\xd4\xd6~\xbb\xb8\xb7?\xcd\x9e\xb0\xffv\xde\xaa\xbfp7Y\x12K9\xdc\xbf\x81p\x8e\x85\xc0\xa6\xc0\xbf\xd3\x8f\x0b\x84\xc5\x0f\xef?\xd0a\x19\x8c\xd4)\xe6?\xfc\xd4\x8e8\xe7\xd4\xe1?\xe2\x93f\xc3\x1do\xf6?($\xe5K!K\xe8\xbf \xe2\xb5\xa9\xe2\xc3\xf4?\xa3c\xba\x0b3\xf1\xcb? \x95\\K\x98?\xed\xbfw\x7f\xc0\x9eCS\xf2\xbf<\xc8:!\x90\xf2\xf9?D\xe1\x0f.\x0f\xb0\xea\xbf\xdat\xcd\xdd~i\xcc?\x18\xf6\xeam\x81J\xeb?\xef\xcc\x1c8=\xca\xf0\xbfZ\x16\xa6}O\xb6\xdd\xbf\xe2d\xc7\xd8#\xeb\xf3\xbf\x82\x858-\x9aU\xe6\xbfy1#1i\xc8\xed\xbf\x91!\nV\xbe\x90\xd9\xbf.\xfdT\xeb\xf5\xa0\x9e\xbf\x1f7\xd6}\xd3\xb0\xe7\xbf\x98\x8di\xb9\xa0\xb8\xff?\x87\xbes\x82\xcf(\xee?W\xc9E\x93\xbc\x06\xe7?\x86\xda\xeeK1\xac\xf3?\x90\x8c\x9f!\\w\xb5?+y\xc1\xdcS?\xf0\xbf\x18%\'\xce3\x9f\xe0\xbf\r4$\xe6\xad\xab\xbf\xbfQ\xa4w=\x085\xbf?\xb7\xf4\xc7a\xf7\xdc\xb1\xbf \x87\xa6Z\xea\xa8\xe8\xbfZ\x85Z\x88\x17\xb1\xdc?\x04\xf8@\x1a\x13\x1d\xe7\xbf9sT\x95E\x8d\xd7\xbfo\x02q.\xf6\xeb\xd1?Pm\xf6{\xed0\xd0\xbf]b\x90E\xc3k\xe6\xbf9"3\xe6\xe0\xef\xb7?\x89 K\x1a(C\xe9\xbf\xee\xaa\x14hu\n\xdf\xbf\xc1jW#\x1d@\xe1\xbf\xe2.\xbe\xfa\xa1:\xdc?\xe0\x14\xa5\xdb\xbeO\xbb\xbf\x00ze\xd5\xa7\xbb\xa8?\xe2\xf0<\x1d\x9f?\xc9\xbf)thR\xf2\x84\xde?.I\xea\xf6O\xce\xe2\xbfk\x1d\xd5\x08]\xd9\xba?\xb1\xcdK\xe9a\xee\xf5?mZ\xf3|@\xa6\xf4?<\xaaK\xe4M\x99\xbc?\x02?\xb6\xe7w\x8c\xd5?a+<\x06\xf0\xb7\xdc?\xbd(|gh\xf3\xca\xbf\x10\xb5v\xa3\xaf\xde\xcb\xbf\x05\xfd\x9bW\x9b\x86\xeb?>$A\xe7\x95U\xf6?\xe5\x90F\xe0o\x91\xca\xbf`\x8e\x13\xbcp\xee\xb0?\xf6\xb4f\x19\x86C\xcc\xbfG[\xc0\xc66\xb5\xd1\xbf\x95W\xcc\xe3 \xaf\xd6\xbfA+\xb5\xb9L3\xdf\xbf\xf2\x90\xdb\xcc\xbaG\xd1?\x85k\x87\xc0\xfb\xda\xa5\xbf~\xafp\x9e\xd5"\xed\xbf)\xa5\xf4\x9c/\n\xed??\x0f\xec\x97\xdd7\xae?\x9d"\xb0F\xa2\x82\xd7?\xf6gm\x8cN\x0e\xba?Y\x14#\x034\xf5\xd9\xbf\x85=\xda\xbf%\xc3\xec?\xea\x98\xab\xd41\xea\xd3?)\xcc\xf6\x11\x0e=\xd7\xbf|\xfa\x06\xa3\xd1S\xda\xbf\xf1f\xd6\xb6\x0b\xed\x8e?L\x1c\xa7i\xfee\xb2\xbf\xf1I\x19\xf4\x00\xb3\xdf?\xc3\xb7\x93/\xa6J\xcd?Ax\xa8==\xac\xb6?\xf5\x80#\x8a\xaa\xf6\xd6\xbf)\xbf\xd7\xe18\x1c\xf1\xbf\x8c\xd5\xa1\x03\xd6b\xd2\xbfFA?\xe9\xb3\xfa\xe7\xbfSR\x1aT\xf3J\xdf\xbf\xed\xb6\x0e\x90Vq\xd1\xbf\x89?)\xa6$l\xe6\xbf\xbbQ\x91\xf5\xf4\x96\xaf?@\xc5\x89j2h\xd3\xbf\x92\xfb\x82\xe6\r\xc0\xdd?\x07"\x18\xc6\xea\x06\x9c?\xb8Iu{\xea\t\xdf?\xad`j\x1f~.\xe8\xbf@\xd3\xed\xc5OQ\xc2\xbf\xf0\xa7<\x84\xdem\xe8\xbf\x1bb\xae\xd3X\x81\xd3\xbf\x1dN\x88\x85\xba\xb9\xd6?4^\x9dt\x0f]\xc2?\xc8\x12\xbb\xf6g*\xa5?\xe9\x0c\xc1\x88c\n\xe0\xbf\xb2ld\x06\xd59\xd4\xbf\x93\x0cq\xda/;\xe3?\x81\x87\xe0\xa6\x1e\xdb\xc7\xbfHY\xc492\x01\xf1\xbf=\xd5\x15Y"\xfe\xee?\xcdO\xb4\x10X\xf2\xef\xbfE\x00,+\r\x08\xf6?\x94)\xdaD[\xac\xdc\xbf\xa9\xc8\xcc\xc5I\x00\xc7\xbfLk0%\xc8\x86\xce?P\xdb\xb4\xb6p\x14\xa2?\x0f\xe7\xb8%\x86\xa7\xe0\xbf%\xe6\x82P\x7f\xa7\xda?\xd6d\xa0_\x99x\xf1?\xed\x10\xf8\x18\xce\xdb\xca?;?\x9a\xf1\xfe\xe5\xca?;v"\x8e\x0b\x81\xb8\xbf\xa3\xa6\xc7G(\xdd\xec?\x8c\xa5y\xd4\x1b\x8b\xb3?L\x8e^\xc4\x80\x8d\xc6?={\x80\xdd\xa9\xe7\xeb\xbf\xab\x97\xe6|\x9c\r\xcb\xbf\xc5$>_\x1d\xec\x7f\xbf\x84\xdeh\xb49\x11\xc5\xbf\xff\xdbn\xe7\xa2X\xdf\xbf\xb8~`\xc0\xb9\xd7\xb8\xbf\xfa\xf0\xc9\xa3\xe8w\xda\xbf\xcb\xe51\xb1xh\xc7?$\x95\xc9\xd3K\x0e\xe6\xbf\xcd-L-\xd2\xfb\xd4\xbfu\xf7\xb8\xdb`[\xe7\xbf\x11\xf9\x9a.\xe5:\xdf\xbfl\xb1E=\xe8\xa4\xce?@\xc7\x1d4-\x96\xc2\xbf\xc6\x1f2P\x99I\xcb\xbf\xb1\xfeP\x08@\x07\xb6\xbfxr\xbc\xeb\xad\xef\xb3\xbf\x84\x01\xf0}r\x94\xd1\xbf\'H\xcd\xd6\x14]\x94?\xa0l\xdeU\xde\xbc\xc0\xbf\xbf^\xff?\xf7&\xe0?\x8b\x19\xee\xd8m\xf0\xcc\xbf=\xca\x12\x95\x86 \xf7?\xb5\x94Af\xe8\x9f\xbc\xbfct:\x1bks\xe5\xbf!\x95\xd5\x9e\x85\x8b\xc6\xbf;Rb\xcd9\x96\xc8?\x99"\xf7=D\xf1\xaf?\x04\xb7\xe7\xb1X\x1c\xe3\xbfJ\xb8h\xbe;k\xe6\xbf\x02w\xd5@V\x0c\xe1\xbfm\xb1^\x17Hj\xc6?\xbc\x16\x85\xe4\xf8\x8e\xe5\xbf\xeb\x1dS\xf1\x7f\xef\xf2?\xeb\x93v\x181y\xc4\xbfH\x81L\xd6\xce\xb6\xe9\xbf\x89|.D\x9a\x93\xd3\xbf\x88s\x8e\x80\xae\xf5\xc9\xbf\xd4\xe3\xe9\x1bM\x8f\xd6\xbf,v\xa6\xba\xeaP\xb8?\x0c\xc3\xf8G\xc9\x85\xcc\xbf\x9a\xce\xa4\x9b\xec\xf8f\xbf\xd6\xc3P\x90\x01c\xcb?\xf9@\xdf\xfa\n\x80\xd4?\xa4\x81s\x91\xe8%\xd7?\xe8\xbf\xc1=j\xbd\xdb\xbf\x0f\xa8[t\x9b\x82\xc5\xbfN\xf5Y\xd7;\x88\xe4\xbf\x02\xdf\x81D\x03)\xe4\xbfq\xd1\xc8\xe4\xbb\xe9\xe2\xbf\x00ey\x88&\xa1\xe1\xbf\xc0\x97\x1f\x8b.\x12\xd4\xbf\xdc\x87\x9a\xe1\xd0\xb1\xd8\xbfF\x95m\x89\x1a\r\xb2?\xadS\xf5^\x974\xee?i\x1a\x16\xc71\xed\xb7\xbf\xf1\x87\xf8\xadD4\xdd\xbf1\\:<k\xdb\xef\xbf\x83\xd3\x18=\x04\x95\xb3?\xfc\r\xbaQ\x8f\xbd\xc2\xbf\xf3\x19\xa8w\xb5\x88\x8f?\xa0u\x0c\xa4\xf7\x1c\xe2\xbfh\x8f1\x0c\xcen\xb6?:\xca\x12|f\xbe|\xbf\x96MH\xbbI\x95\xc3?\xc7\xe3\x125\xf7\xaf\xb3?J\xc4\x97\xcb\xcd0\xe1?g\xf9@\xef\xcf\xff\xdc\xbf&\xa4\\V\x84\xfc\xc8\xbf\x0b\x9631R3\xec\xbfZ\xf5\xa3\xf2S(\xf0?\x1eO\x8e#\xde\xad\xea\xbf\x1d\x07\x879I\xdc\xf0?>r:\x93\xd1,\xcd\xbf\xd9\x9c\x04\x16M\xab\xe5\xbf\xe9L\x1b)Qq\xdc\xbf\xc1\xcdR=\x9c\r\xda\xbfi*\xbd[\xb7\xe2\xe4\xbf\xc6\x95\xb8\xc5~$\xe9?\xe9S\x99*\xf8A\xd8?\xa5X\xcc\x7f\xc3\x1a\xe0\xbf.\xfc0\xd2%\xf4\xe4\xbf \xc3J\xd0JE\xef?\xd5\xd5\x08\x8fB\x86\xa2\xbf\x98\x9e\xbe\x9fA\xe5\xe5?\xf7\xd6\xf5\xe3#\xd5\xd1?\x11\x12\x19\x07\xc1+\xaa\xbf\x8c\xebx\xe8\xd7"\xf5?`\x861\xa6\xfa\x8f\xe0\xbf\xecv\x9f\xf7\xed\x1d\xc1\xbf\xc2\xbd\xe1r6A\xc3?\xae\x8b\x9fN\xf3?\xe7?\xf1F\xfd\xbb\x81g\xe2?\xf6\xf2\x18\x07\xac\xa2\xce\xbf\xb0\xb3\xd6\xd44\x1c\xd6\xbf\xf0Q\xb1\xe8\xeb\x13\xe7?\x15\xae\xb6\xbe#@\xcc\xbf\x80\x04_\x97n]\xe8\xbf\x8ey\xa8\xc5]\xcf\xee\xbf\x8cK}.\x80\xd9\xd5\xbf\xd8\x9b\xfb<\xfb}\xf5?\xa2\xd3\xf8\xcb\xf6>\xd3\xbf\x06\xb9\xafJV\x1c\xb3\xbfX\xd2\xa7\x05\xcfe\xd2\xbfz\xc8\r \xf3F\xe0?\xa3\xaf\xb6\x93\xc2\x96\xb2?i\x9d\xa6\x03P\xd7\xd1\xbf\x1f\x9a\x96Z$2\xd9\xbfj\x1b\xfa\r\x0eg\xe5\xbf\x0f\x94\xcb\x1a\x94(\xdb\xbf\xeahv\xdf\x01\x17\xf0?\xdf\xadco\xb6\xd4\xe6?]J\xce\xf7y\xc8\xe8\xbf\xe1\xf5\xb4U\xedG\xe9\xbfmTK\xb9\xac\xeb\xbf?5\xc1/\xd1\x1bW\xca\xbfw\x85\xa3Vyq\xc9?\xd1\x8e\xa7Ba\x90\xa2?W\x15\xc1\xba\xd1\xa3\xe7\xbf\xa5\xe7\xf6\x9aI\xac\xeb?\xe5\x1f\xcc\x90\xc1#\x9f?\x00\xb3\xc1\x97K\xe5\xc1\xbf\xcc\xeb\x92G\xed\x88\xb3?\xb1P\x07[\xe3\x8e\xcc?\xc2\xc182x\t\xf6?\xca@\xccX\xea$\xac\xbf\xf5\x8b\xe6\xef\xe2\x91\xe8?\n[\x8f\xc8\x8f\\\xea\xbf\xe8)\x00\xd4\x8f\xc7\xe5\xbf\xc1t\xc0\xfd\xbc\xb0\xd7?\x8a\x0b{\x1b\x0b"\xcc\xbf\x8c\x9e=\xd3\x99\xdb\xd6?\x0f\xb0\x19@\x9fL\xcd\xbf{\x11\x08\xe8]\xf6\xc8?\xd2G\xcfP\xe0\x8b\xda\xbf\xf7\xd8\x86\xde\xc2\x0c\xcf?\xfabG\xa8O\x80\xcf?s\x9f\x944\x02\xfa\xe0?\x06\xf7\xef\xf6\xec0\xe5?;\xc1r\xa1\x88\x8d\xe7\xbf\xa2Hi\x81\x12\x11\x90?IA\xd0\xbd.\xd0\xf1?\x91\xbb\x17\xc8\x1e\x1f\xe8\xbfM\x92=\xa9\xef\x8a\xd2\xbfI\x85\xab\xc5\xf6\xd4\xd6?\x8f\x86\xbd\xe3\xad\x17\xb1\xbf4k\x97JG&\xb1?JP\xa9/\x1f\x18\xf5?s\r\xa9W\xca\x82\xe3\xbf%\xf4\xcd0\x9dp\xd4\xbf\xd0\rJ\x97\xd6\x1b\xe1\xbf\x9c\xcf\x8e\x12?\xf8\xe1\xbf\t\x19<K\x11\xa9\xe1\xbf\x97nf\xed?:\xd1\xbf|\xa8\xd2\xf1\xc3\xfd\xb3?g\xcc\xc2&\x01\x1c\xe8\xbf\x9ff\xe5\x8c_r\xf0?\x8f\x06+q\x8c\xdf\xd0\xbf2\xa9C3\xa9\xca\xd7?xR\xe8\x1d\xe7\xf8\xcd?\x9f\xcd\x11\xcb\xe8z\xc1\xbf\xf0\x1d\x89H\x99b\xdb\xbf\xd76\xa8\x00\xe5"\xd5\xbf3\xfa\x90Ow6\xe1\xbf\x7fP\x81zK_\xa3\xbf\x0e~`\xf0\x15\xd6\xcd\xbf\x9c$\xae\xe0l\xfc\xea\xbfY\x8eKi\x83\t\xf0?\xc4m\x7f#\xb7\xfb\xab\xbf\xc6\xcb\x92\x18\xb5@\xe5\xbf\x87\xa1\xa0\xa5\xcbQ\x96?\x95l\x86K\xbe\x1c\xed\xbf\xa0\x02\xfa\x87jd\xe4\xbfD\xa4b\xdfT\x89\xcb?\xfbR\x85h\xc3"\xe5?\xa1\n\x10\xcf\x11\x84\xeb\xbf^\x80S<\xdb\x86\x9e\xbf\x115\x8b\x10\x85\x19\xc2?\x97\xa4\xa6\x9a}W\xd4?\xc8\x99-\xadZi\xc3?\xfe\xb9G\x13UN\xe4?\xd8\xfc"w$\xb8\xe5?\xffE\xaa\xca\x8d\xaf\xae?\x15\xa7~\xd1p\xc7\xbf?\xf4\x9e\x84.\x16\x1b\xea?F(x6\xc0O\xf6?\x82q;\xa3\x17\x84\xc3?\xc4\xab`_fw\xd1?hs\x89\xdf\xd5\x05\xdd\xbf\x996&\x06\xd6\x99\xce?H\xdc\xc9|\x19\x8c\xb7?C,\xc7r\x83\xab\xf3?\xf7Q\x1a4(3\xe8?"\xc2\xb9\x13\x07q\xe3\xbfX\xc6\xda\xed\x96\x99\xe0\xbf#\xe5\xd4b\x04\xab\xcd?\xaa\x12\xf1\xeb\x80b\xd9\xbf\xaf(\xf4\xac\xd0\xd6\xe4\xbf\xd8\\\xf6lNW\xbb\xbf\x9f4\x85\xcd\xd7m\xbf?S\x83\xb1\xb8\x14\xe9i?\xe4,y\x01C\x03\xe3\xbfs\xb9x\xce\x02\x80\xfa?\x8c]zY\xa3\x1c\xc8\xbf#\xc6\xc9\xc0\x1d\xf7\xe5?\x1b\x820\xbdg\xd6\x99\xbf\xb5\x08\xc1-R\xa5\xeb\xbf\xe3\xe1\x19\xed+\x9f\xf4?\x908n\xcf\x165\xe6?6i\xb3\x01\\\xaf\xbe\xbf\x1ej\xa3\xb3\x81\xc0\xf3?\xb1\x15\xba\x16\xec\x16\x94?\xf9~\xed\x82"\x94\xd8\xbf\x88\xa2\x0e`\xc87\xf8?\xe5\x00)Zh\x1b\xe4?\xca\xd5\xfeJ\x11R5?\xdd\x06\x99\x19\\\xea\xc3\xbf\xbc\x13\xbe\x0b\xeb\x1b\xec\xbf\xba\xa6\xc10\x1c\xd3\xe4\xbf\x9f\xa0Z\xd4\xfcI\xa1?I\xc4#\xf2\xdb\xce\xe3?\\\r\x90\x1ci\xd7\xb4?\xb3S\xe2\x00\x1f\xc5\xe6\xbf<\xc5\x8emD\x7f\xb6?\x83\x99\xa6[}\x9c\xae?\xfc\xd2T\x9a\xff;\xe5?\xff\x13\xa9\\\xb4\xd2\x9f??\xdb]m\xc48\xe1?\xf3?"\xd8\xf8\xd3\xe9\xbf\x80\xcai\xac\xac6\xd0?<\x1d\xa4W\x17\xa9\xc2\xbfY\x8d#\x07\x018\xa9?h?\xac\xb3uP\xa0?\x01\xbbc\x9d%\xad\xa4?\xcb@h N\xc5\xd1?\x01\xa4\xcc2\xf0\xcf\xe7\xbf]\xa6_\x91B\xca\xcb\xbf\x0fq\xf6%\xae\x8b\xfa?j^aS\x01N\xe2?\x86\x9eoY\x04\xcd\xf2\xbf\xb8\x84&\xaa\xd0\xa4\xf8?\x82\xd1SM\x92\x06\xe6\xbf\xa5\xdb\xda@\xe3Y\xeb?\x16\xc0c]\xdb\x96\xcd?\xdb\x85\xc5\xff\xed\xea\xd2\xbf`\x8f$\x90K\xb4\xb8?\x14\xd9\xb0/\xfe}\xd6?:w\x99fn\xb4\xdf\xbf2\xf6\xd0\xdc\x84&\xd2?0\xcd-\x86\xf3\x04\xf7?\xa5\x97\xb5\x8dN\x94\xe2?\n4\x82\xd8\xf7\xbd\xe5?(\x9b\x99\x04\xda\x18\xd1\xbfW\xe2G"M\xa2\xe5?\xf6\xa7po\xaf\x10\xd2?\xe7\x8d\xbe\xfc\xb1\x88\xdc\xbf\xf6]\xfa\xfe\xfe\xd3\xe8\xbf\x99\\G\n\xa6P\xb7?or]Sxe\xd4?\xdd\xd4I\xd3\x89$\xe6?\x8dn\x16\x86\x9b\xbc\xd2?\x83\xf3YP\x07\xe6\xc8?\x8f\x9eu%\x95\xa7\xc7\xbf@a\xc4V\x12\xcc\xe3\xbf\xfcQ\xfdT\xa0\xb7\xe6\xbfh1\xd3cd\x03\xe9\xbf\x96\xd8_a|s\xea\xbfx\xabO\x156\x16\xc7\xbf[\x9e\xd4\xd05Q\xef?\xb6&\x18\x15\xd1\xa1\xd2?\xde(y}4\xa7\xe3?\x8f@\x00\x9c\xa44\xe4?=WE\xdfKy\xb2\xbf\xac\x07~\xf9\x10\xd9\xde\xbf\x1a\x98\x00\x99\x14I\xb0?\x12Z\x8d\x01\xd1\x96\xda?Czs#\xfa\xb8\xed?\x05I\xd8\xb2<7\xac?\t\xbe\xa2\xa0\xd9\xef\xf6?r\xd2K~\x88\x11\xd8\xbf\x18H\x0c;X`\xe2\xbfUx\xe9nk\x93\xe0?!3\xf6U3\x9e\xe1?\x8f\xccF\x8d\x8d\n\xe3?H\xe1\x91|4\xd2\xce\xbfF\x11\x1cI\xe4J\xe5\xbf\xc5Qp\x8e\xb8\xb8\xd5?\x16\xaf]\x9f\x16\x15\xae\xbf-?\x8c\xd5\x0bf\xe5\xbfF\xca\xc8\x1a\xfa=\xe9?\x80\xf9\xd4\x81\x1ap\xd8\xbf9LZ\x0b\xb33\xea\xbfj#M\xaf\xb3\xe1\xd4?\xaf>(\x08\x9e\x0e\xc7?6g\xf8\xbcT\x91\xe4\xbf\xb4zN\x1918\xe1?\x85\xb2\xc15`\xf4\xd5?S\xc8G\xe61l\xd6\xbf\xc0\xcc\xa0t\\\x16\xa6?\xd6q\x8b\x07\xe7<\x98\xbf\xeb\x05\x0c\x81\xf0\xad\xf0?\xf3(7\x1b,\x8b\xd3?P\x9e\xcfoa\xacy\xbf\x11\xf9\xa9\xc8\xd5W\xb5?;\xdd\xa3`k\xfb\xe2\xbf\x01\xd5\xfew\xc6b\xcc\xbf\xd5\x82\x98\xa3\xa2X\xbd?\xf2\xbe>\xfd\x823\xdd?3\xfbb\x85r\x97\xe3\xbf\xaf\x11Q\xd7\x80\x87\xde\xbf\nZ\'\x1b\x1f\xe1\xd4?\x87\x85\xd3\xe8\xe5i\xa1?\x97\'\x8c\x7f\xfe\xf2\xe2\xbfs$}X9\x17\xef\xbfFB\x1d\xdfs\\\xb6?v\x0e |\xbd\xf2\xb5?\xf8swY\x0b\x17\x93\xbfA\xd2\x83\xb1\x99\x84\xe1?\xdf[T\x80x\x04\xd1\xbfC\xfa\x96e\n\xd8\xd0?2-n\x06\xf53\xb6?\xd8\xf2\xa9\x1c\xaa\xbb\xd4\xbf\xb9\xb1\x8a\xe9l\x7f\xbc\xbfQ\xbb\x9f\xee\xc34\xe1?r/\x08b\xc2\xe4\xb3?\xf8jbx\xb5\x81\xe0\xbfH\x9a\xceQK&\xf2?\x12T\xfbC1\x93\xe5\xbf\xf6\xa5c\xc8\x1a\x02\xe2?Y\xc9\xe8\xdd\xac\x9c\xda?\xb0\xd4\xad\x96\x8d\xac\xe5\xbf\xf3\x03\xbe\'\x06!\x9d?\xa5\xa5\x9c\x81\x04\x1f\xe0?B!\xa7\xc9\x14l\xdc\xbf\xfa9\xf9\x96\xcd|\xe1\xbf\xccM\xe6\xed\x9b\xa1\xce?A\x83Ru\x81\xa6\xb7\xbf\x0e\x19\xdb\x0b\xfa\xca\xe3\xbf\x99\x12M\x19Sp\xf8?\rn\x1a\xe3e\xd9\xc7?\x14\x96E\xa6z_\xfb?\x8e\xc3\xba\xb4\x95H\xe1?\xfe\xa0\x1b(\xf1\xc0\xd4?\x117\xf5\x066\xa9\xf6?|\xf4w\x11\xbb\xac\xe2\xbf\xfd\xfb\xa4N-\x7f\xc5?\x05\'\x0c\xf3\x1b\x94\xd5?\xf3\x8b8\xc7\x8dC\xf0?\x1b\x07~\xf32\xc0\xea?\xaa_\xd8*\x15%\xcd?\x8aDC\x1a\x99+\xe4?\xf5\xf4\xb8\x03:\xf1\xd7?\xb6\x8eRx\x04\xb9\xe3??\xd0\xcc\xf4I\xf4\xe6\xbf5\xae\xd0\x85\xc6\x80\xeb\xbf\xb5C\x8azd\x9b\xe0\xbf{\x04a\x12\xf6N\xf3?\xc1\xc5\xba\x7f~\xea\xd8?s\x14\x88d\x153\xc9?\xc7\xad!\x04\xaa\x0f\xc8?\xc2\x9e\xe1=X\xb5\xf6?l\xbf\x17\xc2\x9bC\xb9\xbf\xbd\xfc?\xf71\xbc\xe8?\xe0\xc2+3\xef\xc0\xe0\xbfn\x9e6\x04\x8f\x12\xdf\xbfm\xd4\xfb\x04\t`\xe9\xbfl\xa0\xd3\xcd\xc4\xf9\xc4\xbf\x8dQ\xa28<I\xe5?Z\xa4,\xe0\xff\x82\xe9\xbf\xe5\x1f\x03V\x9ej\xab?I\xd3@\x97\x07\x0b\xe1\xbf\x94\xe4QG\x87P\xd0?!sg\x97g\xb5\xda\xbf\xfeu(\xd0yg\xc9?V\xf9]\xefP\xcb\xe6\xbf\x98`O\x13\t?\xe4?&q\xf6\x10P\xca\x82?i\x99x\x13\x99w\xc6\xbf\x9e\xc6\xe9N\xe0\xe9\xbf??\x93\xa7\xcdFx\xd3?}\xbec\x8bl\x0c\xe8?\xa3\x134~t(\xe1?\xf2\xc5Aa\xbas\xde?\xc6\x1a+\x82Y\xaf\xd4\xbf{\x1d~\x11\x1f)\xcd\xbf\x1c\x07\xc3\x16\xac\x03\xde?jb1$\xd2\xd8\xd5\xbfB\xa3\xb4u\xa4(\xe1?#:\xf1\xce\xfaL\xcd\xbf\x9d<\xbf\x94\xa3q\xf1?e$W\xb2\xe7\xc9\xcb\xbf\x81R\xa8q=\xa5\xd4\xbf\xa8\xf6\xf5 \xb8g\xbf?\xa4\xf5\xa3\x1b\xc6\xae\xe5?\xd7\xf8\xcbbpx\xd1\xbf\xc6\xf7m\x03\xb9\x97\xe8\xbf\xf5\x1b\xb7\xe9!\xda\xd9\xbf\x9a\x16\x11\xb1]\xcd\xf7?\xa7\xd4\x95\x88\x7ft\xa7\xbf\xa1Tp\x14vo\xd8?P%\x82\x8d\xd86\xe2\xbf\x85\xd4\x11Gm\x9a\xed?\xf8\xf4\x91[\x11!\xb4\xbf\xaa1HT\xe8\x08\xf4?Dj\xc8@\xf4\x9e\xe0?\xfa1\xe2\t\xeb\xea\xc0?\xbc\xfbD(\xa5 \xd1?\x11/!\x04\xa1\xd7\xd9?\xf4\x1c\xea\xe0\xef\xa0\xe1?\xc4\x9d\xb7\xe5\xf2l\xaa\xbf\x80\x9bO\xab\np\xcc\xbf\x15\xe1\xbaV\x00b\xe7\xbfyL\xf8\x06\xc4\x93\xd3\xbf\x1f\xb8\xbd\x9c\xa3Z\xe6\xbf\xe2J\x1b\xd6b+\xb4?1\xf4j\x8b\xf3\xd1\xd5\xbf\xe7\xfec\x12\x92\x9f\xbc\xbf8\x11_\xf4\xf8\xd2\xd1?\x1a\xd8W]\xaa\x0f\xcb?\xb0<\x8c(\xeb\xc7\xe2\xbf\x96\xff\xbb\xe0\xce\x0f\xd8\xbf\xb5\x91F\xea\xb3\x01\xbf?\xf2\\\xf8\x85\x90\xae\xd6\xbf\xb5wO\xc7w\\\xe0?f\x80\x08\xc3\xa4\x19\xec?G3\xdb\xd3\xd6}\xe5\xbf\x1b\x8c\xc0\xb1\xbe\x8f\xdb\xbf)\xd5N\x0c\xc7\x99\xed\xbf<\xeb\xb7\xcb\x7f\x8e\xd9\xbf5\xac\x12X\xc9\x9e\xd5?\xeb0\x99\xa8-\xb9\xfb?\xcc\xb9\xaa\x85\xc0\x9b\xe5\xbfX\x06\xbb\xd8(\x11\xd3?\x97\x0b-JFI\xa0?u|\x90?\xb2\x18\xf0?\x9d\x82$\xd9j\x01\xb1?\t\xe6\t\xec\x1dU\xf3?@\xf7\xf9\xe4\xf2\x16\xe5?j\xa9\xfe\x04\xab\xa0\xe6?\xde/)\xd2\x16\xc2\xdb?\x90 s\xa2\x92\xaa\xc6\xbf\xfb\x1e=L\xfe\x8c\xc0?\xfc\xc6R5\xf3y\xc8?<\xe8\xc0a.\xc8\xdf\xbf\xd5\xab\xaf1\xd9\xb8\xea\xbf\xffD\xd2\xff*\x9b\xda?$\xdf-{\x04K\xda\xbfS\\9\xa2k)\xe1?FtD\x19\xf2\xbc\xe4\xbf\xcd\xa9*\xb3\x15b\xe3\xbf\xa5\x13\xea~\xd8J\xee\xbf\x05\xc4\xc2\x99`\x8d\xc0?\n\xca\x97\xc0U\x9b\xdc\xbfU\xdb\xf6d;\xa7\xec\xbf\xd0\'\xae8r\xa7\xea?g\xed\x1bH=\x08\xe7\xbf7\x8ei`\x12\xa3\xb2\xbfg\x9c\n\xd4\x08+\xd1?\x97M\xed\x87\x02\x10\xee?\xab1\xbf_-\x04\xd2\xbfW\x95\xe4\x15\x05\xca\x85?{${G\xbaf\xc1?+#\xbf\x99\x9e\xd0\xf5\xbf#\xf56t\x18\xac\xe4?,\xbe\x876_\xb3\x93\xbf\xbb\x89}\xcb\xdfA\xe5?,\xa4\xb9\x9e\xac\xa8\xf8?\xb4F\x81.\x91\xa0\xaa?m\xc4N\x14\xa9y\xd5\xbf\x85\xa6 \x83\xd3\xca\xf5?^,=\xae\xf3\x7f\xd9?\x17\x82\n\xf8\x95{\xcb\xbfz$\x98\xd8\xbd*\xd4\xbf`\x03\xea\xb9\x7f\xa3\xd6\xbf\x18\xd93a\xcdU\xed\xbf\xa9\xb8\xc3i\n\xe5\xea?8{\x1e\xff\x8f4\xf1?\xf8)\xa3\xf51N\xbc?\x19\xeb\xf3\x95\xdd\x82\xe6\xbf=\xafT\x1em\xa0\xd1\xbfd\x90\x9c\x96\xbd\xe3\xcd?\xce\x1dF\xf3q\xcc\xc8\xbf\x8c\xeby(\xdfq\x8c\xbf\xb3V\xcd\xe3=\x86\xd4\xbf\x94\xf9\x193,\xb6\xe8\xbf\xe2\xb4\xdf\xb4\x03\x93\xb6?\xb1\xb7\xa9\x12V\x88\xd8?\xc8\xf1\xb4\x11\r\r\xa6?\xcc\xcbN\x8c\\\xbc\xe3\xbf\xd2\xcd\x0c\xf9\xaa\xd4\xda\xbf;&\xe8g\x98\x13\xc1?{\xb8\x126}k\xeb\xbf\x89\xd5cQ\x11U\xf7?!\xad{\x0egG\xf3?\x9a\x8b;\xce\t7\xc1?\xef\r\xff))\xac\xe8\xbfi\xf7`\xedn\x1c\xe7?\x08t\x81C\x94\x0e\xbd?\x02\xd3w#c*\xd4\xbf\x8b\xe5\n\xc6\xc97\x94\xbf\x93\x16\x18\xa8\x11\x14\xd1\xbf|T\xfa\x94\x95\xc1\xd3\xbf\xaf\xb7\x8c\x8c\xa6\x98\xcc?\xa2\xcd8\x067\xfe\xe4\xbf\xe6\x18\x10]\xbeE\xe6\xbf\xf7e\x10@)6\xe1?\x93\xa1m\x99\xd6\x04\xd9?\x824\x02\xaf\xf9-\xe9?\x0f\xe7\x8b\xaf\x93\xbc\xbe?[\x1eI\xa0\x1e\x15\xb2\xbfc\xfa^\xe8\xc2\xe0\xee?\xda=\xde\x02\x1cT\xeb\xbf\x9c\xf2Mb\r\xec\xca\xbf\xb2\x010\xcf\xbc\xee\xc7\xbf\xca\xcf\t\x83D\xa4\xcf\xbf\x1e*\x10\xfb\xfa\x80\xe6?K>"\xe0@ \xce?\x1f\x1d\x1b w\x99\xd3\xbf\xa2>y_Uc\xca\xbf\x81\x7fe\x7f{\xf1\xe6\xbf\xe1\xda\xad\x86\xd6\xb7\xe2\xbf\xfbA4%\x18\xc4\xe9\xbf\x19Q\xf6i\xd1M\xe9\xbf\x9dh\x03g\'L\xd9\xbf\xce\xcb\x99\xd2\x9b\xdc\xe1?r\xee\x06\xe9\xf7\xd4\xc1?\xa6\x18>\xd78\xdd\xdc?I\x86s(\xe0\xda\xa9?&\x10\xbb\xbcL\x93\xc7\xbf\x84\x8dO$\xd8\n\xe3\xbf\x06\xc5\x89\x00\xf8\x85\xb1\xbf\x13e\x94\xe5\xb4\x90\xcc?9\x9a\xc4\x9e\x0cB\xd7?\xf5\x8bK\x06\xd7C\xd7\xbf#\xd9\xd9#^\xa4\xc5?0T\x80.L\t\xe3\xbf\xe7\x02\x01\xe8B\xab\xe5?\xb3\xf7\x0c\x8e:-\xc6?\x97\x135o,\x1a\xe1?|LO\x9a5r\xe1?M\xabC\x91\xd0O\xca\xbf\x1c5\xdc@O\xb2\x9b\xbf)\xbf\xfe\x89x#\xf7?G\x1d\x9c\xdf\xa3\xe2\xe2\xbf\x1b~\xc3e\x00W\xe6\xbfD\x97a]\xf2)\xcb\xbfJDj\x7f\xb3\x97\xe7\xbfi\xcb\xee\xf9c\xfb\xe8\xbf\x04\x93\x9f]\x05\\\xc0\xbf\xe9\xb0\xa5\x92\x8cF\xbc\xbf\xc7y\xe4\xc0\x99\xa9\xed\xbf\xb3?\xc3\x01\x87\x0b\xd9?\x93\x91\x03\xb5aW\xe3?1\xd9&\xba\xf8}\xd0\xbfj\xedL\x882\'\xe2\xbf^04\xaf\xf9I\xcb?^\x18H/Ze\xe4?\xb3\xa5wf\xed\x00\xc8?\xa1\x8f\x14K\xa9L\x98?\xd4\x19I\x80\xd5\x14\xeb?\x0c\x8c-\x1a\xb1\x06\xc9\xbfS\x86\x14b\xc1\xeb\xef?\xeb\xff\xe8\xaeS`\xd2?2|\x05+\x18g\xe6?\xdf}\xa88d|\xe8\xbfK{\xa7+@\xd6\xf1\xbf\xa2\xc73\xc8\xaa\xd7\xe1\xbf\xca\xeb\xbfZL\x0b\xc8?"\x9e\xda\xdf\xceU\xe4\xbf^(\xcb2\x15\xc8\xe7\xbf.\xdb\xaa\x0b\xb3\xbd\xa0?lQ\xff\xaeT<\xd1?LU\xe8\xfe\xc0c\xc5\xbf\xd7\xc5L\xba\xb9\x05\xf0?G\x0e\xfd8\xc8\xf1\xcb\xbf\xc7zX}]\xed\xa0\xbf\x91\xbev\xbdN\xc1\xbf?\xdf\xb7\x1c\x14\x1aw\xd7\xbfR@\x94\xd9w\xd7\xdc\xbf\xef\x18L\xccQ\xb1\xee?\xb2\x11\xc5\xd8\xd4\x91\xb6\xbf\x02G\xc3\x1d02\xaf\xbf\x84\xcen\xa0\xff\x02\xd5?\xa21\xf7\x7f\tS\xbe?\xdf\x8c\xda\x17r\xfb\xe3\xbf\xa3\xd5\xd8\x14\xb2\xa8\xec?\x91`\xdd\xd2\xf2\x94\xe5\xbf\xd9KX\x1f\x1f\x1b\xb2?C@\x85\xa36%\xdc?@]Z\xa6bZ\xd2\xbf=\xb8\x0b\xd6O\xf6\xe2\xbf\x0c\xcbmd$&\xda\xbf\xb4\xd4\x8f\x8b\x87\x88\xf0?S\xbdJ\xd0\xc4^\xaa?p\xf2\xaa\xb6\xfb\x8a\xe9?x\xe9\x1e>\x99\xb6\xd3?\x06\x8c\x90UmH\xf2?\x93\\\x1b\xf0\x9b\xd4\xc4\xbf\x8b\xb39_C\x17\xb3? s\xba\x86&c\xd1?\\\xfb\x9c\xb8+\x94\xc7\xbfG5\x07H\x9f0\xae\xbf.\x15\x94\x8a\x11\xa9\xc8?\xcf\x10i\xbd\x83\x7f\xdb?\x12\xc6\x8c\x0cQS\xe5\xbf\x866\x06\x92\xc9x\xa3?\x15\xe0\xc2\x99Z\xd9\xf6?8\x03D\xcb\xa4\xee\xde\xbf=a}f\xe66\xed?\xdeGb\xfd\x11S\xc0\xbfn\xf2X\xf1\xcd\x89\xde\xbf\xe1\x81\xce\xcc\x15\x8d\xe2\xbf\xed\x00X\xfc\xe8\x91\xb3?\xb4\xd0\x00\xda\t\xb4\xd6\xbf\xdd\xdayl\xcc\'\xd1\xbf`\xfeK\xbd\xf0"\xd9?M\x8d\xf8\xf5\x81\x82\xd7?Zai\xfaI\x0b\xc5?\x84\x80\x0e\xbc\x0e\xaf\xf0?XV\xf9\x84\xe8\x08\xe8\xbfb\x1f\xe0\xaf\xa3\xe9\xaf\xbffC\x16\x002\x86\xf3\xbf\x1a\xd2\xd0J\xbd\x00\xe8\xbf\x93\x19F\xe6\x06\'\xd7?\xd36\xe1\x83\xd7\xf7\xe9\xbf\xedi\x927=V\xea?\xe5\x0f\xf8P;c\xe6\xbf>S\xb3\xcd3P\x7f\xbf\x1dd<\xa2S\r\xed\xbf\xf1\x8b\x06\x14]\xe8\xd5\xbf ^\x93\x8eg.\xe5\xbf\xc0\x9d17\x0b\xc9\xd3\xbf{\xc05j\xa6\xb2\xe3\xbf\xfc\xc6I\x15(\xd4\xc9\xbf\xa9\xe1\xb1s\x0c4\xe9\xbf\xeb\xfcp4`g\xe0\xbf\x88\xe8\xdf\xdf\x1a\xb1\xdd\xbf\x19\x9e[h+\xf3\x9a\xbf\x8a#\xda\x7f\xad$\x94? Y\xbd\x19\x92\xf7\xd1?\x9d\xa0\xe3\xa8D\xfb\x80?\'\x96b\x9a\xec\x93\xa4?\xb5\xca\x83m\xb2]\xe0\xbfQBB\xbe\\^\xca\xbfy3,\xb6\xd2\xd4\xd8\xbf\xa6C\xaa\xce#T\xe7?\xb3\xa8\xde\xd4\xb7\xda\xd9\xbf\xe0\xe3"}\x0f\x10\xea\xbf\x9c`"\xdb\xc9\xbe\xe0\xbf\x1b\x89\xc8/oS\x9e\xbf\xe4\xeb\x9f5\x0e\n\xe5\xbf\x0f\xa3U\x0f\x8ay\xe4\xbf\xd2\xc6/D\xfb\xef\xe1\xbf\xcav<\xd6\x0b\xa6\xdb?\xb4\x00\xf2\xcdkT\xa2?\xb2\xee\xb4AD\x0e\xe1?\x03+\xae\x82<\x1b\xe6\xbf\x93Q\xb4K\xfe\xde\xea?~\xd2=Ze\xfe\xde\xbf\x87\r\x06\x8d0\xe7\xc6?\x02\x8e\xf3\xaf\xce\xa7\xe7?\xaa\xc7$\r\xa2m\xcd\xbf\xc8/\xc9&\x1eZ\xda?\x8fm4\xf5x|\xf4?\x9b$U\x97`\xfe\xec?"\xcb\x03H\xd4#\xd6\xbfN\x8b\x15)\xa7,b\xbf\x96$\xd5\x8a\xc0}\xe3\xbf\x03\xac\xbat{A\xe2\xbfK\x16\xddij\x19\xe1\xbf?e\xa91\xb2\xf7\xe6\xbf\x05\xb1\x91;\xcct\xec\xbfT@\xe3\xa7\xa6\xaf\xe6\xbf+\xf1\xf2\x15\x8bc\xe1?"\x9b\xf5jV\x01\xec?\x12u\xeb2\x98#\xe8\xbf*vk\x10%B\xe1\xbf\xaf=jv\x97\xf2\xc9\xbf\x00\x05j\xd7\xea\x0c\xa4\xbf\xe4\xef\x82\xb2Q\xe6\xb3\xbf_\xc9\x9fha\x8f\xf1?\x9f+\x7f\xd0FK\xe5\xbf\xa5\xd3\xd3H\x07R\xa6\xbf\xf2Ifv\xd4\xc8\xe7\xbf:\x84\xae\xec\xbd\x07\xe1?i>\xe8\x0f\x1a\xef\xc3?\xab\x8c\xedX\xc5\xc3\xe4?r\xa5\xb0\x85\xda%\xc9\xbf\xb4&kK\x02\x11\xb7\xbf\x0b\xf0\x14\xe2\xe5\x17o?\xbfy\xeb\xb2\xffH\xe9?\xf5\xc1\xfd\x81\\\xb4\xdd\xbf\xf7I\x90\xe2\x19\xf3\xec?\x16\x12\x00\x0e\t\x19\x84\xbf\xd9\xa8\x94P\xda\x90\xe6?\x9fq\x98m\xc4\xd3\xcd\xbf\xaf\x7fNp\xea\xd5\xe5\xbfW\xf0\xa9\x9d\xef-\xe3\xbf:\xfd\x0e\xc0\xa7\xa3\xcb?'
p39
tp40
bag2
(g3
(I0
tp41
g5
tp42
Rp43
(I1
(I9
I256
tp44
g12
I00
S'\x98\xeb\x83D3\x80\xd2\xbf&])e\x9d\x10\xd3?\xef\xee\xa1Z\xdf\xbf\x94\xbf\xd9\xc5.\\\x87\xd8\xe8\xbf\xfe\x17\xf1z\xd7\xab\xbf\xbf\x8c>\x84\xe9\xb1\xc4\xdc\xbf\xf6\xbak\xfb\x88\xf9\xe9\xbf\xda\xb5\xedD\xb6\xb9\xe0\xbf\xc1\x86Cq\xb7\x8d\xbb\xbfgG\x03\xa0`\x96\xe9\xbf\xdb\xea/_\xdb\x0f\xb5?\x88Y>\x1d\xdaM\xe6\xbf9\x98\x98IKe\xe3\xbf\xde`\xc6\x9eW\xeb\xe2?\xf6\xe0\x1d\x98\x957\xe4\xbf\x0fJ\x14\xf0\xf2\xe3\xf9?\xea\xae|y\xfc2\xd1\xbfN\xdc\t\xfb\x87\xaf\xd5\xbf\xe7\xcb\xdb^\x13\xfa\xd1?\xda2\xf1>\x84m\xf9?\xb0\x9c%\xbcD\xee\xd0\xbf\x12\x9f\\\xbd\x8a\xba\xc0\xbf\x9b\xa7q\x1c\xf5\xc4\xe3\xbfX\x8e%\xc7[n\xe1\xbf\xc8\x1f+,\x99^\xc4\xbf\xde\r@+\xe3\x94\xef\xbf\\)@AU\'\xcf\xbf\x17Y\xef#\xf3Z\xa9?IZ?\xcb\xc4\x0f\x96\xbf\xfe\x9c\x9b\xf9\xd6\xcc\x83\xbf\xdc\x97\xdc\xe5\x05\xfb\x87?DTA\xfb\x8av\xcb?\x9b\x9cQ\x07\x9e\x15\xf0?\x9a\x9e\xdc\x15\x0fG\xd8?\xe4\x02\xc4\x95\x02\xfd\xe6\xbf \x00\xdc\xc5\xeb\x18\xd3\xbf\xe9Or\xed\xb3\x02\xaf\xbf\xed\x0e\xf7\xd8\x9ck\xe8\xbf.\x1d\x02\x11!>\xe8?\xe5\x06\x85\x17\xe2\xa9\xd9?3\x82\x00\x9d\xcd\x08\xdb\xbf\x0e\x89\x91\xf0\xf4,\xe9\xbf<\x8a:A\xa3\xbc\xe0\xbf.\x81R\x9c\xda\xbd\xef\xbf\x95i}\x90\rg\xde\xbf\r\x17\xd7\xb8\xa7\xa6\xde\xbf\x18\x95\x17\x90IH\xe1\xbf\x13da\x12\x9ba\xc4\xbf\xb7\xb8)\xbf\xd6\xaf\xd5?\xd1;\xe6\xc7\xc1\xf0\xc7?N\x1f\xc4\xa3\x80^\xdb?y\xfb\xfc\x982.\x81?\x1e\xe2\x04\xdc\xd6\x9f\xd8?<\x1bIv\xfc\x94p?h\xa7\x1a\xdfc!\xc4\xbf/\x9a\xc6\x95\\\xaa\xdf\xbf\x8d\xae\xf6\xda\xa4e\xe0\xbf\xd5d@\x97\xaec\xc8\xbf\xfb\xad\xc2\xc4*\xe2\xe0\xbf\xfa\x95\xfev\xa86\xce\xbf\xb4\xe1\x84\xd5RY\xe9\xbf\x87%\\\xa9\x8bt\xec?\xcaF\x17\x02Cn\xe6\xbf]\xe4\xaf\x8a4\xa3\xd9\xbf\x07\xb5\x83\x02zV\xdd\xbf\x00+\xb9\xacem\xd3\xbfh\xda\xbf1f\xb3\xe4\xbfd\xb4\x0f\x9a\x8d\x0b\xe0?6\xd4\xa5#\xd3\xab\xde\xbf\xd1zxt\x8c\x7f\xcf\xbf\x8a^\x88BOp\xdd?\x0f\x88\xed$l\x95\xe4\xbf\xe3\x80_C2t\xd2\xbfF\xfb\x90\xd0\xf02\xee?\x7f*\xa5?\x02\x04\xe8\xbf\xb0\xdb\xd4fDo\xe9\xbf\xe7J\xea\xea\xcf0\xf1?\x8c\xd4M\xc7\x1dv\xcb?\xdfj\xc8\x92\xc3\x17\xab\xbf\x00\xb5\x95\xc4\xcf\xf0\xc3\xbf\x83\x87\xba\xe3\xd1\x8f\xdb\xbfnzR"\x1f\xd5\xe6\xbf\x80{\xa02p3\xb5\xbfbd@\x1c\xe5d\xc0\xbf!Q\xbe\xea=\xc7\xdd?B\xcd\x05\xbeg\xb2\x92\xbf\x9e"\x93\xe2v\xba\xac?E_7%\x93\x92\xec\xbf\xe1x\xd7\xc6W\x00\xcb?\xb9\xf0Z\xa7\xc9\xa4\xc0\xbf3\xe9y#i\x94\xd2?\xf8\x0bK\xc0\xffu\xf0?x\xa8\xe8\xc8\xb0\xeb\xe8?\xa0\xcbH\x8f\xc7\xb4\xd2\xbf\x14fE\x97\xb3$\xda\xbfoGb\xbc\xee\xc2\xdd?\'\xf3\xca\xe1\x0e\xe9\xd1\xbf`\xa3\xa1\x1ea\x8e\xbb\xbf\xb1e \xf3z\xfe\xf3?/\x86\xff\xbf\x93\x0b\xf8?\x9d\xfb\x85\xb0!\xfd\xe7\xbf\xdf`\x07\x12\xf0\xc8\xe0\xbfu5KXL\xf6\xb1\xbfD\xad\x9aw\x95\xc6\xf6?\xd6\xf8!\xf8X\xae\xa4?\nhvP^\xba\xc2?s\x1e\xa7\x95\xad\xcf\xe0\xbf\xe2\r5q\xa9\xeb\x91\xbf\xa1\xd6\xc7\xbc\xe9\x80\xd2\xbf\xa5y\xb4A\xbc\xd6\xd9\xbf\x12FtT\xae\\\xe1\xbf\x85\x83\xd8\xe1&\x7f\xec\xbf\x81[_!\xaaZ\xe2?\xc5z\xf0A\x9f3\xef\xbf\xae\xdc\xfaN\xdc:\xe2\xbf\x08\xc5#\xc1\xaaG\xb5\xbf\xdbtxH#\xa6\xd8\xbf\xab\xc21&\xc9\x18\xe7\xbfr\xa3\xd8T\x85W\xe6\xbfc\xaal<\xd4"\xea?\x9d\x0c\x90H\xcfw\xd5?\xcd%\xcc\xee\xe6q\xf0\xbf\xbcM2\x8a\xb1\x1f\xf2\xbf\\\xe0\x19\xa4\xdb\x06\xf6??\x08\x0b"\xb9\t\xb1\xbfQ\x08\x06i\x1e\x92\xed\xbfEw\xad\x153\x05\xe9\xbf(CV\x8bG\x97\xd9\xbf\x12\xfd0\xbe\xb0\xd0\xe4\xbf\xf3SRf\x92\xab\xca\xbf\xc3e&\x1e\x06\x11\xb0?[\xd5\x95,\xae\n\xe3\xbft)\\\x13mK\xe1\xbf\x91\x89L1\r\x9d\xb3\xbfW\xef\x19u\x08\xac\xd7\xbf\x92\x8ajT\x0f2\xde\xbf\x85\x15\xa5O<^\x90\xbf\xd2\xd1\xa3~p\x10\xda\xbf\xadR\x98\xa4\xc5!\xc9\xbf\xdaNh\x86u\xac\xd6\xbfR\x96\xde\xf5\xe2\xd1\xc9\xbf\xf8\xba6\xf2\xd5s\xd1?\x08\x81\xf5\x1f\x0c\x08\xe7\xbf\x18O\xabi\x1dw\xea?\xd3\xd5\x93Y\x164\xf2\xbf\xc3\xd9\xfbt\x9f\xc0\xd5\xbf\xc4p\x02\x02\xe3\xfe\xd2\xbf\xf1Z\x89\xab4\x1b\xe5\xbf\xbc\xbf\x83\xde\xf3\x86\xe5\xbfO*\x98o\xf2.\xf7?\xd2\xea\xfa\x12 #\xfb?\x87\t^\x01\x95\xf9\xee\xbfv1T\x1e\x96a\xeb\xbfD\x9d\x84Q\n\xf0\xc0?.\x95\x13\xf9\x1eo\xfe?W>\xeanv\x9f\xfa?\xfbl*{@\xe7\x99\xbf\x08D\x95#\x18=\xd3\xbf\x15\xc8\x93>M\xa4\xe7\xbfH\xc1\xb7\x7f\'\xb3\xef\xbf\xb90\xe3\xd5U\x17\xf7?kK\xf4\xdf\x8d;\xbd\xbf\xd7t\x11\xff\xe6\x98\xd4?\xf4^\xdeM\xd4\xd4\xe3\xbf\x918\xd56\xd9J\xc1\xbf\x84\xbd\\\xb3@\x10\xe6\xbf\x8fTiaz\xab\xe4\xbf\x11V\xed\xc1\x04\x04\xc5\xbfT\x98K`\x0c\x87\xd1\xbf`*\xd1\x89\x94\xc6\xeb?$\xdc:\xc4#\xca\xdb\xbf\xcbsQ=h;\xcf?\x99&_/\x92\x90\xdd\xbf6\xbd\'\x05*\xb5\xe4\xbfHe\xd3a\x0b \xe4\xbf\xb2\x12\xeaSc\xe3\xee\xbfN\xcf\x96\xe9D\x92\xea\xbf\xb43\x1f\xc8].\xb6\xbfm"|;\xfc\x19\xd0?M\xf1 \x9a\xba\x9b\xc3\xbf\xcc\x05\xb53K\xa0\xcf\xbf?\x86\x9b\x9b\x10[\xd5\xbf\nI\x8fe\x16\x86\xae?\xb8\xad\x18\xe4=\x12\xaf\xbf\x7f\x1f\x92\x86o\n\xf0?\xf9\x08\x0c\x0c}\xf3\xe2\xbf\x03\x85\xb8\xc5(.\xf1\xbf\x81\xa2B8v\x1a\xd7\xbf\x15,\x96-Q\x8f\xc2\xbf\xa9U\xc7Y\xda^\xdf\xbfg\xad\x08r\xe9\xda\xa1\xbf\x86m\x1b\xb8\x1e\xc8\xe6?~\xab\xae\xddz|\xd5?\xc75\xe9=\xf2\xb2\xdc?\x99\x8bz\t\x0f%\xd5\xbf9s^#\xb7C\xd3?od\xc3#\x02\xd6\xe5\xbfLdyml\x8c\xba\xbfb\xa28I|\r\xe1\xbfK\x0b`\x8fB0\x9a?\x1aY\xb0\xd0\xd0H\xe3\xbf\x83\xed\xd6\x90O\xe0\xe0\xbf)xX%F\x15\xeb?*\x7feu\x90\xba\xf2?_\x130/\xe2\x80\xe8\xbf#}\t\x1fJ\xec\xf3?\x11M\x9d\xf3`\xff\xf0?\xdf;&\xf6\xc5?\x84?yerU@\x1c\xdd?+a+F|\x94\xd2\xbf\xcc\xc2jem\xde\xd0?&eq\x85\xac\x16\xf9?I\xb6_\xf6k\xb3\xec\xbf\xe8OTm\x19\xa1\xe9\xbfU\xa3%;X\xe9\xeb\xbf\xd9\xc7\x9a\x83\xd6\xd6\x95?\xae\xc0\xf3\xee\xf4I\xb6\xbf\x9dw\xd3\x10`\x1d\x9f\xbf\x91l)\xc6\x0f=\xf2?\xd3\x9d\xf4 f\xdc\xe7\xbf\xf9\xa1i\x80\xa3/\xd1\xbf\xc3\xb1\x91\x02\xf9\xbe\xef\xbf\x7f\xf5\x7f\x89\xc7\xb2\xa2\xbf\x02"\x85\xb1T\xc6\xe3\xbf\xdd\xf9\xbd\xbd\x0f\x03\xe6\xbfG\xa1\xf5\xc4w\xd2\xeb?\xa7m.\x1a\x9f\x1c\xca\xbf\xac\xce\xca~\x96\xab\xcb?\xf5\x8a\x9f\xbd\x10)\xeb?w\x9el\xdc\x82`\xe0? \xa5\xac}Qm\xe6\xbf\xa3\xb3\xff\'\x1a\xcd\xb5\xbf\xe7\xa9\xda\xf8W\x8a\xf1?\xd3\x12E\x93\xd9\xda\xb1?\xa1\xbb\r\x15\xcaD\xd8?\x00\x0e\xfe\x03\x89\xb8\xe8\xbf\xcd/\x8b\xb15>\xdf\xbf\x06\xd8n"\x9a\xb3\xdc?x\xd3\x12\xc8\x1d7\xe1?\xed\xe4\xa2"\x0f2\xd1\xbf\x8b.\xf0\xe9%\xd9\xe6\xbfn\xd4IO\xf8\x97\xda\xbf\xf5\xf6\x82\x95\xa3Z\xf1\xbf\xb5\xa8\xcbW\x82\xd7\xc4\xbf\xd4\x9b\xc48gq\xe0\xbf\xebK\x84-\xef\xfa\xe9\xbf\xf5\x00\xd5\x00aq\xc5\xbf\xf0h\xad<\xbd\x94\xd9?\xac\xbd\xb3M\xedh\xda?L\xa9\xe4l\xc5\x04\xc9\xbf\x9f\xfd\x9d\x94\xec\xc9\xe5\xbfO\xfcj\xe0q1\xcd?\xb4\xeb\x90\xacG\xf7\xbf?}\x11\x90)\xa2\xd0\xc2?\xd6do\x02\xeb\r\xf3?, \x1c\x98\xd1e\xb5\xbfk\x0f\xd8\x94\x0e\xb5\xd4\xbf\x88B,\xa9\xbeF\xbd?\x1e\xafS7\xf5\x92\xea\xbf \xe6h\x16o\x12\xf1\xbf\x9b)u6Qz\x8a\xbf\x1f\xd4\x1b&7\x83\xe6?[\xe3\xef?`\xea\xea\xbfB\x03\x98\xa5=\x81\xe1?#\xf7\x16|\xe8p\xba?n\x8e\xe4\xf8pG\xe5\xbf|T\x00\xad\xe4D\xf4?\x07L\xd7\x18\xdc.\xe8\xbf\xd6\xd3g\xa8D\xb4\xe1\xbf\xd2\x99\x0c\x99&0\xf0?q\x0e\xe9z_\r\xb3?\x1a\xfb\x82\x0f:\xc9\xe6?[-\xfa"\xbeA\xec?\x98qf~1#\xde\xbf\xd1\xf5k\xea\x8c\x9b\xc4?\xfeU\x99y\x0f\x17\xe6?1\x03\xfeUX\x97\xde?\x9f)\xfb\x86H\x9c\xea\xbfw\x1e\x0b\xffu\xc6\xc3\xbf.e\x95\x92&\x05\xd6\xbf\x89Q\x19\x9d\x86u\xd6?\xef\x0b\xbe\xf7%\x0f\xe5\xbf\xe3Y\xf8\x9f?\x9b\xc4\xbf\r\x8d\x84\xa5L\x87\xa5\xbf\x97\xfa\x95\xf1\x8a\xfc\xee?\x1f`\xe8\xfc\xfaX\xe6?\xe9\xda\xb6\xfc.\xd8\xe1?\xe7<\x83\xbfw\xdf\xe5?\x9bG=\xb7G\x83\xf6?\xe1\xb61U#;\xa8\xbfQ\x90\xd8\xden.\xee\xbf\xbd\x03\x0b\x19#r\xe1?M4\x86\x97\xce\xa7\xfa?h\xb4\x9d\x96\xcf\x93\xd0?\xab\xfd$\x9c\xf8D\xe5?\x97R\xda\xc9\xfae\xa0\xbf\x16\xba_\x01\xf3\xe3\xe1\xbfy\x16PfaR\xd3?\x9bg \'\xac\x9d\xe3\xbfu@b\xed\x9c\xa3\xe0\xbf\xbc\xec\x7f\xd6\x07\xf3\xed\xbf3\xaa\xea\xdd\xda\xeb\xd3\xbf\xc4\xb7\xa9ug+\xef\xbfuJNH,-\xe0?>{|\xf5\xdd\xcf\xdc?o)\xaf\xfb\xb0\x8c\xc5?P-\x99T\xe0(\xe2?hH\xff\xc7P|\xc0\xbf\xfb\x8e\x83\x05\xa4\xb6\xf2?\xe2\xf3E:^\xf6\x00@_\xda\x14\x05k\xab\xad?\xa0\x07\xfb\x87\xfb\x05\xc0\xbf\x15\xa3,f\x0e\xc0\xe7\xbf\x92qvkN\x9e\x00@X\x81\xbd\x9a\xf0\x04\xd4?n\xb2\xb8\x1dT{\xb5\xbf[pt\xb8\xbdB\xe0\xbf^\x8f\xad*i\x1a\xc2?\x86\x9c\xb2\xf2\x1b-\xe1\xbf<\xd8#\xd5\x9c\xe6\xcf\xbf\xd8Rz\xf8\xf71\xe2\xbf\xbd8q\x83\x8c\x8c\xca\xbf\xa9\x15\xbf\xde\n\xa6\xe3\xbf@\nO\xd7i\xaa\xfa?\xf4\xbecE\xb4\xb2\xe4\xbf\x80\x16?\xb4\x08\x84\xe7?\x9d\xd0T\x95\xc8\x89\xe9?\xa8\xcb\xb0\xb5)S\xe6\xbf\x81\x8e\xc4\xd6\x9c5\xde\xbf\xbbGk\xfdD\xdc\xe7?\x8c\xbb\xed\xf3\x88\x91\xeb\xbf\xdc\xb0; fs\xe4\xbf\x0bH\xd5V\xb1\x0e\xe8?\x8f\x88\xd8\x95\x16\xed\xc1?\x8e\xbf\n\xd9\x87\xa7\xf3?\x90\xa1\x93\xb9)\xe9\xc3?\x01\xf5vf\xef\xf1\xd2\xbf\xe2n\xc0\xb5\xb4\xd8\xdd\xbf\xb1\xedW\xd7\xa3\xfd\xc1?\x1f\xe2K82\x84\xd3?\x16\xfe$\xbc\xa3F\xe5?L\xeaX\rK_\xb1?\r)\xfe\nK\xd5\xe5\xbf\xa5\x85\xbdI\xe7m\xb0\xbfX\x89\xb9c\xb3\x82\xd5?\xb4\xd0#\xb9\x1bv\xc6\xbf.\xc9\xad^L\x98\xc9?v\x16\x91\xf9\x92]\xf1?\xf1\xabrnc\x11\xfa?0\x96\xf1\xc6\xf3\xc9\xdb?\x8f\xd4\x1el\xb3{\xbc?\xe4\x98mr\xadm\xe0?3_;\xf2\x93\xf6\xad\xbf\xd1%[\x13\xeel\xda\xbf\x18\xb7\xe1\x82\x9fO\xd9?\x0f\xe0\x00\xf3)\xe4\xaf?n\xc5\xc0\x7f`\xf9\xc2\xbf\xcf\xa0\xa2T \xb6\xe6\xbfN\x92+\x83 \xfa\xc4?,\xdb\x9eg\xa3\x16x\xbf\xce\'\xb2]i\xb5\xbc\xbff\x9c\x9f\x13j\xbd\xc3\xbf\xf4$\xe5\xc4o\xe7\xc8\xbf3\xfc\xf3\xbd\x86\xbd\xe8\xbf\x9fX\xd7Oc\x8a\xeb\xbfr\x94\xbf\xf2 T\xc0\xbf\xd5\xce\xc4\xbd8\xa2\xe6\xbf\x93\x8a\x86b$|\xcf?d\x0eS\xf6\xaa\xe5\xe4\xbf\xeaC\x9d\xd9\x05+\xee\xbf\xbe\xaaf\x93\xb5\xa2\xe4\xbf\x19\x0e\xa1\xa3\xfb\xcc\xc8?g\xd7W\x03\xaau\xdb\xbfgk1a7~\xcb\xbf\x85\x1a\xe2\xebMy\xe8\xbf\x94\xf1/m\x90s\xf1?l*]$\xa5x\xc8\xbf\xc9h\x9aKR\x82\xe5\xbf0\xdcjf6@\xef\xbfz\xe8\xac[\xd1\x1b\xe6?\xca\x93\x0e\\\x18s\xdd?N\xe8\xa5{\xf8\xde\xe7\xbf\xb2K\xd3x`\xef\xd9\xbf\x90\xdd?\xa36\xb3\xe0\xbf\xcetv\n2{\xd7\xbfzV\xa9^1d\xd3?#\xa7\xeda\x90\x1c\xe4?\xd7\xd2\xf4[h\xf2\xe4\xbf\xd5\x9e\xc3\x10\xe2\x1d\xda\xbf\xed\x05\xb0l\t&\xcc?\xa1\x93\xd3\xc4Z6\xa6\xbf\x07\xaa;\xc0\x8d\x0c\xe2?2!\x8e\x95:\xcf\xdf\xbf\xef\xc1\xcb\xcf\xf7\xb2\xbe\xbf\x9b\xee\xa3D%m\xb5\xbf\xf7{\xdb@\xe2\x01\xe8?\\:f\xd4\xd2\x9b\xd4?*\xf7\xb2\x95\xbb\x92\xd6?\xa2\xeb9\xcbET\xa6\xbf\xac\xa4\x93\xd7Kg\xf2?\xeey\xc7\x98$b\xe9\xbf;\xd4\xec\x0f\xc2\x8a\xd2\xbf\x98\x80\xfbu\x103\x93?\xe8\x13&\xd7\x88\xd4\xe3\xbf<U\xfe\x18\xd0\xf5\xe2\xbf\xfb\x18\x00F\x07\xaf\xf4?\xb8\xef\x0eL\xd3\x00\xf2?\xaa@jX\x8b\x88\xeb\xbf-6\xf7\xc1\'9\xe1?\xe5\x1c(\xe5\x82\xda\xda\xbf\t\x9d\xfdF\xae\x05\xf1?\xf3p\xab\xb6\xd8\r\xf1?\x8b\x99\xec\xed\x1f\x9e\xe0\xbf\rj\x0b\x8f\xb8"\xf3?\x8f\x1b\xa4\xf8\x17\xf4\xea\xbfj\x12\xc8ym\xf0\xe4\xbf\xf5S~\xd2\x8d)\xf4?\x12\xa8\x84\x8c\xc6\x9b\xd5?J\xbf\xa8{\r\xb4\xbe\xbf\xfa\x05\xc6\xe0\xed\x1e\xd8?q\x92)\xcb\x91\xf6\xe1?_\xb4\xc3h\x9c\xee\xe3\xbf\x926F\xff\x94\xb1\xe5\xbf\x0f\xc2m\x9e\xe3`\xdd?\xa9\xa7\xdb\xc1\xeb\x0e\xc5?ri\x82\xc3\xab\xf5\xd2?\x0f\xf1\r\xba^c\xe1?\x99d\xd9\xe5$\xcb\xf5?i\x90\x1bbT\xc1\xd5?\x89\x1dp\xeaj\xaf\xe4\xbf-\xb5\x05\xfe\xb7\xd9\xde\xbf\xa4V\x9b\xf7.\xd0\xec\xbf\x1f\xf1\xd6Z\xa35\xd2\xbf\xf2\x83\x8e\x92\xa9|\xc4\xbfy\xfdx\x07\xac\xd9\xd1\xbf\\\xc6\x1c\xb2X\xb5\xc1?\xe9\xec,\xaaM\x1b\xd7?\xcba\x1fh\xf6F\xc4\xbf\xb1\xc2X\xfcX\x8d\xea?\x97\xe0w~\x1cr\xc6?\xc0\xb7%`\x15\xc6\xec?;D\xd9{d\'\xe1\xbf3{\x93)\xa8\x92\xe4\xbf\xf5lR\r\xdb\x91\xd5\xbf\x14\x80\n\xb1\x88\xb9\xe4?\x94\x8a\xe7I\xc1\xbc\xc6\xbf\xad}\xe4\xd24\xc2\xd1?\xc0v\xe8HM\x9b\xed?\x99\xa4\x0f\x07\xde\xb1\xda?\xee;2\xc35\xd4\xfa?\x7f\x0e6\xdea\xb6\xc0\xbfKE_\xb8\xe87\xf1?\x1f\xc1\x95\x15cu\xaa\xbf\x80\xa0\xf0A\xbbc\xc0\xbfXg3p\xa9@\xba?W\x03n\xf8\xbeY\xc7\xbfg\xaa\xaf\x91\xde\x85\xd9?\xabHVv\x80\x00\xe7?\x1cd]2f<\xd9?\\\xda\xc9#\xca\xd0\xef?Q\x19\xc2{s\x9d\xc0\xbf&\xf9J\x8b\nW\xa4\xbf\xf0[>W)\x1d\xd7\xbfz-[\x01\xeb\x81\xc8?s\x10\xa8\xd9\xe2\x14\xef?zO\xd1\xa7\xbf*\x9b\xbf\xa0\xde\x0fK\xb2\xf3\xc9\xbf8\xf6\xaf~\x18\xb7\xd0?qh2\x9c\xf7\xa8\xe1\xbf\x02J\xc0\x00Am\xe6\xbf\xbd\x89\xeci-n\xea\xbf\x9b\x9d\x02\xc4\x154\xe5?y|\x9b \x9eK\xd1\xbf\xed\xe0\t\xe8\xb6V\xb7?\xc3O\x82\xc2\x14\x1e\xbc?\x01@\x07M\xdb\x04\xe7\xbfm\x1b\xf9\xac\xdc\x06\xeb?\xddZ\x19\x95\x85\xcd\xe4\xbf~\xdf\x85^\xb0\xb5\xc5\xbff\xe5\xf6"k\x11\xe6\xbf\x03\x91Tv\x92u\xda\xbf\x8a"P\x1f\xd7\x9f\xc0?\xd4\x95\x8c\xfd\x7f\x18\xbf?\xc3S \xda\x0c\x1b\xd7\xbf1\x06@[\\\x85\xdb?\xab\xc73\x98\xe0A\xe4\xbf\xf5\xa3\x1cH\xd6K\xe1\xbf\xa4Q\xcd=s\xcd\xd7\xbfB]\xcc7\xa1g\xfd?$\x1a|\x0enb\xd5?\x88\x99\x10\x12\xacA\xec?\x04V\x004\xc5W\xe6\xbf(\x953\xb3\x0e\x0b\xed\xbf\xd7\x97\x1a\xeew\xfc\xdc?\x87Y_,\xa9?\xe9?\xa3\x85H\x87\xb7V\xd9?\xdaS\xc8\xdeo\xc9\xb9?\xc3ax\x1e\xb1\xcb\xd4\xbf\xe3_Z#`B\xeb\xbf\x92\x85k\xd2K\xe7\xb8\xbf\xf2W\xda\xd5n1\xd2\xbfx(D\x13\x0c\xa2\xde\xbfc\xee\xe5\xf2\x02f\xcb?\xcaYHb6\xb7\xb9?i\xaf\x00\x9b\xaaa\xe9?(\xe2)z)H\xe7\xbf\\\xe7\x1908\x83\xe3\xbf-A\x00+\n\x89\xc8\xbf\x9b.\xc5i\xa8\x98\xf5?0O"|\x0f#\xe6\xbf9\xe1J?\x9c\t\xeb?\xcc\xd5dj\x90_\xd2?l\xde\x8d`\xe2\x85\x9a\xbf\x8d\xd8|\t\x8c\xc5\xca\xbf\xa8\xdf\x97\xa6\xe1+\xed\xbf\xbat\x11\xc7]\xac\xe1\xbf\x06Q\xd8\xe7\x0f\xdc\xbe?\x87\x92\x16\xce\x16\x0c\xf0?t\x87V\xdf\xc9C\xcb\xbf\xc8\xc8d\xf3,\xd1\xf1?\xc2\x97\x92\x03\xb4\n\xe4\xbfd\x10\x04\x93<\xcc\xd5\xbf\x84O=f\x07R\xf6?]\xc3\xfd}i\xb5\xe5\xbf3<\xb7P\xc9\x1b\xd6\xbfKWo\xca\xf8\xaf\xda?k.\xcbKH\xa9\xd0?\x1d\x9a0\xdd\xdf\xfd\xd2\xbfd\x8e2)-\xff\xf4?\xf8f\x80\xd9\x9as\xd2\xbf\x9c\x86%R:\x88\xca?U\x0b\xda\x04\xe1\x0b\xdd\xbf\xee\xf9e\x9c\xde\x0b\xdf?\x14\xbd\x1b6 <\xf0\xbf\xbe\xf5\xf1H7\xd5\xd4?x\xeb\x08[GI\xe0\xbf\xf5\x1aBA5\x97\xc6?E\x08U\xf4Wh\xe4?\xdc\xb2\xaeU\rG\xe2\xbf\xa0\xee2\xb2\x01\x06\xa5\xbfA&\xa2\x00[o\xee?\xa7\x07\n\x9c\x8e\xd8\xe3?\x0c\xefo\x8f\x9c\xca\xe0?\x1d\x15^\x1a_\x1f\xcd?\xc7\x84\xd9\xfa\t>\xd1\xbf:\x11\xafu\xa7#\xe2\xbf=s.V\xdb\x9d\xed\xbf\xa7?F\x1dB\x8d\xe7?!\x13S\x88\xe4O\xef?6PR\x80x\x87\xe3?T-{\x17Z9\xcd?.\x9b\xc1\x8e\x82h\xc9\xbf1VE\xc5\x91\xbf\xe1\xbf\xc9\x86,7.\r\xf1?1\xfe6D\x80\xfc\xd4\xbf*0yd\xe7\x08\xd2?\xa6\xee\xcb\x03\xb4\x14\xf0\xbf<11\xd6\xde\x96\xd0\xbf\xcd\xfd<\xa5\x9f\xde\xee\xbfYE\xa5\xfa\x11#\xdf?y\x17"\x8b\xa9\x99\x9e\xbf>N\x1dwC-\xd1\xbff\xb0D\xd4\x8c\xa8\xe0?\xa3lp\xc4\xb3w\xc1?#\xb0\x87\x1d\x18\'\xc4\xbfk\xe5sP#\x08\xf0?"RqL\xebZ\xd6\xbf-4\x91\xfb\x8a\xf9Z\xbf# N\xa2\x90\xaf\xe8\xbf\xc6\x150\xe3\\\x18\xe6?\x95\\\t\x8c\x189\xe1?\xd4 \xbf\x02VF\xb8?\xf6\x0cu UZ\xe6?\xaf\x0e\x91\xf0Vc\xe3\xbf\xf15\x00\x00\xda\xf3\xd9\xbf\x13\x8d\xed\x14\xf7\xeb\xd2\xbf\n\xbe\xf7\xed4\x96\xd1\xbf\xd5\xc5\xd9\xba\xb5S\xb5\xbf\x9b;>\xce$+\xb4?<?\xea\xcf\x1f\xdf\xef?\x87\x03I\x9b\xb2\x07\xd4\xbf[\xcc\x00\xb8\xd9\xe4\xf0?\xf7\xe4\xcb\xb7\x1d\\\xd7?a\x80J\xcc{\x8f\xe6\xbfZl\xe7\x89\xa4O\xe9\xbf\xe7\xe3\r\xf0\x858\xb8\xbf\xe3\xc1x\x13(\xe0\xd8\xbfZ\x0b\xe4\xad\x86\xdf\xde\xbf@;\x8f-\xec?\xe2\xbf=$7C3U\xd0?\x19+\xc33\x82\x86\xf3?u\xfa\x93\xb4(C\xd1?\xdd\x92\x12\xf0\xff\r\xd9\xbf\xc5\xeb1Y8\xe1\xe0\xbf~\xd11\xa9\x9c=\xb7?\xc4\xbd_\xeb\x10\xa4\xc5?\xa8a\x87\xcd\x8b!\xaa\xbf\xfat\xd8Gy\x83\x95?\x9ak4V\xbdW\xe7\xbfH\xfc|!\xc8N\xef?\x90\xbf\xc2\x8en^\xb0\xbf\xfb\xd9H\x06\xd7\xae\xd1\xbf5u\xd7\xd8o\x9f\xb1?\x9c-\x8e\xacX\x99\xdc?\xbe\xe6\xb6\xbfNm\xe8?\x88?PVl\xd0\xe1\xbf\xfc\x91\xcd\'\xe5\x04\xc4?\xf8\xb7\xdb\x8464\xbd\xbf\x028\x16]\xd4\x82\xbe?\x14\xb9\xba-\xbf\x8a\xe9\xbfitH_\xfb\xb1\xd3\xbfh\x83\x12*\xd0\xd1\xe1\xbf#hy\x9c\x99;\xc1?$\xd6\xacCl\xd4\xe6\xbfk\xf6\xb0\x81\xb8\xce\x93\xbf\xdeH\x02\xacB \xd9\xbft\xaa\xf6\xb3rQp?\xc4\xd1\'\xa3\xc3f\xb9\xbf\x9b\xdcP\x8b\x12A\xca?0\x82\xa9\xe8\x932\xea\xbf\xe7\x12\xee\xe0x\x0f\xd3\xbfdm\xa8\xeeUd\xa6?\xb4\xc0j\xae\x94\x8a\xe6\xbfx\xdf\xe6v\xd8\xe0\xf5?\x9e\xda\x93\x1ff\x8f\xee\xbfQ\xcb\xc3\x0e\x14\x1c\xe9\xbf\x0f\xd3\xdf\x08\xb5\xbe\xd7\xbf\x8e\x0e\xd5\xdfGn\xbb?_ #Q09\xdb\xbf\xa2\xb7^\xea\x83g\xee?\n\x1f\x07\x8e\x08\x92\x88?\x87\xff@.\xc17\xce?\xecE\x0e\x8d\xb7K\xe4\xbft\xe7\xb2cQs\xd0?\xd0\x13\xa6\xa6+d\xe1\xbf\x8b\xf0\xd0\xe7J \xe2\xbfx\x0f\xc7\x89\x7f>\xd6?K\xf3\x02\xf6R\xec\xc4?\x9ewDg:5\xd5\xbf~\xb6\xb5v\x9d\x0f\xe1\xbf\xff\xbf\xc7\xa6U\xcb\xd3\xbf\xdd\x9a\xd2\xf1Jx\xc1?\xb5M\x16!\x15\x17\xb5?9\xb1\xa0\x8e\xc43\xe4\xbf\x87\x87\x9aD\x07\xd1\x8f\xbf0R\xd3\xda-\xbe\xcf?\xba\xa6\xe2\x8c:\xe5\xd2?\x08\x98\xf8\xc3\xaaY\xf1?meVz\x0c\xa6\xec\xbf)E!`\x0cF\xb3\xbf\xe2-q\x84\x15H\xc3?\xf8\x81.\x8d\xaem\xf6?\xb2\xbf$\xcf\x98\x9f\xd2?\x8a\x94\x03n\xa6 \xb8?\xab\x14\xa2\xe9\xb1,\xb3?\xd2\x97\x0f\x12*\x9f\xdb?\xdb\xcd\')qe\xc5\xbf\x0e\xe4F\xd0\xf6\x84\xdc\xbf\xb3\xa4 &Z\xbe\xdf?\x9bF\xef\xe6D\xd2\xe5\xbf\xc4\x12\x14\x82\x19\xfb\xd5\xbf\xaf\x0f`\x94W\xb8\xd3\xbf\x92\x8b\xc4\x0b6\xc8y\xbf\x9c$\xd9\xc2\xaf\x01\xa6?\x9b.\xc5@Wq\xf7?\x93kv\xd1=<\xca\xbfT\xcf\xd7\xc3\xa5\xf1\xda\xbf\xd3\xaa\x9e[3\x15\xb7\xbf\x9a\xdc\xdcO\x82:\xef\xbfa\x86\xbb\x97H\xfd\xf7?m\xb2S\xe7\xc6\xb9\xea\xbfyo\x18\xd2\xd2\xec\xd7?\xad\xb7F9\x9b\xf7\xc3?\xa8\xe4\xe6\xfaj\xce\xd8?\x94G\x9eO\xfdX\xca\xbfJ\xdeZ\xb1NR\xf5?\x14\xfc\xa0\x8f\xde\xcc\xe3?\xf5Ye\x1e\xea\xa1\xcf\xbfM\xfb\xddV\\=\xe5\xbf\xaf\xc0m\xdfb\xf0\xa7?b8F\xae\x9b\xa1\xa9?>\x95\x013 \xa4\xdf\xbf\x14\x92\xbc\xf2wH\xf1?\xc7kWR\xc6\xa9\xf3?\xeb\x15\x0eq`8\xe0?\xf4\x9c\xab\x88\xeb\xb0\xe0?\xe6\xd87\x10\xf7\x8c\xaf\xbf\xf1R\x9e\xa09\xc5\xb7\xbf_\x0f\x84x\xff\xd2\xbe?\x7f\xf7X\xe4\x99\xa0\xab\xbfu\x1b\xb0\xa3\x18\xa0\xe2\xbf?\x02\xda\xee\xac~\xcd?\x86\x17p\xfc\rG\xa1?\'\r-}\xb7\xf5\xd7\xbf\x1c&t\x04\xce\xd1\xeb?Krp\xc5\xadY\xa1\xbfb\xc3\xf6\x16\x121\xd1\xbf(\x04\x05\xc9\xb1\xa6\xb6?\xcd\xa9\xb4\x8cp/\xe7\xbf$\x96\x95\t\x14\xf4\xba?\xc3\xe1\xeb\x1c\xe8\xe4\xf2?\xba\x0c\xa2j\x9e\xf6\xb9?\xe7\xbe\x82b\xf3\xa5\xa1\xbf\xd6\xc5i\x81\xca\xa0\xcf?E(\x9b\xb7\x1f|\xc4\xbfeJ\xc6\xef\xc0\xe1\xdf?\xff\x10q\xb6\xc9\xd6\xd9\xbf\xean)\xab/\\\xea?\xa9Z\xf9\xfe~\xc6\xf0?\xb4\xf8_\xddi\x01\xd5\xbf\x8a\xe0\xf4\xb1x\xba\xe3?\x1d5u\x9d\x84\x9d\xec\xbf\x8d\x1c*\xeez\xa6\xf5?v\xf1\x88)=\\\xf3?\xf9\xc39<o\x04\xdc\xbfO\x1d\x8b\xda\x8cS\xce\xbf\x9f\xf9\xf6\x0b\xc3\x9f\xd2?\xbc~hA;\xf9\xe1\xbf\xd8\\0\x89\x93b\xe6\xbfp\xf6.a<M\xb6?!\xf4\xdf\x80\x08I\xe5?`\xa5\xc1\xe2`\x85\xd3?\xa5\xe4C\x81\xffm\xe4\xbf\xad\x9e\xff\x0c\x1f\xb0\xdd\xbf\xd9\x05\xa8\x1d\x9f\xd8\xbb\xbff\x81\x10r\xe3\x89\x81\xbfM\x13\x8f\xd6\xe4\xdc\xe2\xbfb2[d:\xb4\xd6?\xa4\x8f\xba\xd5\x80\xd3\xb2?\xe09N\x05\xa8r\xdd?\xa3\xc2.k\x1d\x9a\xd5\xbfi\xbc\xa0J\xcd\xc4\xe5\xbf\xf4\xfc\xf6\x96\r~\xf3?\xea\xd9\xb0W\xd3\xd2\x95\xbf\xd3\xfd\x10\xd2%\x81\xc2\xbf\xc5\x9c\xc2\x92\xd5\x96\xe0\xbf\x00z\xd3\xb2\xach\xb9?\xf3\xcem\xae\xf2\xbc\xdf\xbf\xd2]\x8e\x06\x1b[\xa9?\xc1\xf7\xee\x99\xaf\xdb\xdd\xbf\x94\x03\xca\x07\xa0\xd1\xd5\xbf\x88\xf4\x84r\xfa\x8a\xe5\xbf\x97X\xf8\xb3\xfaZ\xd9\xbfl\x10\xf4\x13\t\xa8\xc9\xbf\xc0\xd6>\xbc\xfd\x91\xe0?3O<@\x19i\xee?\xdd\xd8\x8cZ\xff4\xdc?\xcc#\x196L\x17\xd4\xbf\x11\x1c\xfb\x19\xe2\xe9\xe9\xbfHy\xe1\xd4\x1dG\xbc?i\xb2E\'\x08a\xc4?\xb4G?BWR\xdf?\xb3\xafSI>\xd7\xcf?8\xdc\xd1\x1b\x02\xf2\x95?\xaf\xa6x\xca\xab\xfc\xd0\xbfZ\xfe\xca\xc3-\xa9\xcd\xbf\x89\x0e\x92\x16\xed\xb7\xa2\xbfR\x80\xa8\xd0\xb7\xb0\xc7\xbf\xfa\x91\x18\xe5h:\xea?\x8e\x8eG\xa2i\x86\xa7?&\xa1#\xe9A\xcb\xe4?e.\n>\xecV\xe2\xbf,\xab*.\xba\xed\xc0?\xfa\xcc\x16`\xfe\x0c\xdb\xbf\xb9\xfd\x01ER\x8d\xe5?\xf2 \xfbp\x19\xd3\xe9\xbf\xbba\xa8\xc4\x088\xb0\xbfFa\xa5B\xff\xd3{\xbfQj\xd5\xa7\xdc\x0c\xc6?r-TT\x8d:\xd4\xbf\xb3)\xd2\x9f_f\xed\xbf\xb9\x9f\xf0*\xd3\xb4\xef?4\xdc\xfeq>\x10\xd9?\x9e!\xfad\x7f\x94\xf3?\xc6\x8f\xdf=\xa4\xda\xe5?S\xed1"\x91\xfb\xf1?\xa8\xe4R\xc6#\x1b\xd4\xbf\x10S-Ql<\xd8?\r\x86\xd3\x1e\x00\xf2\xe1?\xfe\xce[\xc2\xf3\xbb\xe0\xbfC9\x07\xde\x10\xbe\xdb?\xee\xc44\xc5\xee\xc9\xd8\xbf\xac@\xdd\x1e\xe43\xd5?\xcd\xb1]\xea\xe1\x8f\xe3\xbf\x96\x87\x1c\x8a6r\xd7?\xb4\x1a`\x16Q\xf7\xd3?\xe8\xfa\xb02\x97\n\xc0\xbf\x12Y\xb5h\xbf\xec\xe6\xbfX\xfc\xdfh7a\xe5?\tC]X\xc6*\xf0\xbf\xc5\x8e\xfc&\xd1\xb7\xc9?\x96\xf3\xe7\xeb\xed\xc5\xde\xbf\xa7\xbbS+\xdb;\xa8\xbf\x85\x8f*W:H\xf7?\xc1n\x06\x16\xf4\xe9\xd0\xbfe-v\xd6N8\xc8\xbf\x9d\'\xa2\xb0y \xe4?f\x1c\xc9lI\x08\xe9?\xa8\xd5\xd6\xf6\xc2\xc0\xdd?v\rr\xf1\xd4\xc1\xb3\xbf\xea6\x0b\x1b4e\xe5\xbf\ry\x98DW\x85\xe4\xbf\xd6\xa4\xdf\x07\xae9\xe5\xbfV\xfe\xbe.c\x93\xec?\x1d$y\x85\x18J\xdd\xbf\x9d\x88\xb8,\x91\xb9\xf1?F\xb4[\xc6(\xdf\xdc\xbf\n\x84\x9e\xb1d\xc2\xbc\xbf\xed\xb9}Ndm\xdb\xbf\xdd/\x15\x18!\x83\xf7?\xa6\xe0\xab\xbd\xa9*\xbe?\x9d\x89G\xcbaO\xf2?\xe1`\x9b5&\xf3\xef\xbf\xc4\xa7\x9d\xd2\xca\x90\xd3?#\x90J\x16V\xa6\xea\xbf>\xcb\xa44\x88\x99\xde?\x92\xc0\x08B\xc3Q\xd9\xbfU\xce\xe6\r\x1b,\xa5?\xae\x1f\x80\xae\xd2\xefj?m\xb3d\x9e\xfe+\xb5\xbf)\xbf\x84\xaf\x851\xe1\xbf\xf4\xd1\x81S\xc9\xd1\xcb\xbf.\xbb\x08=\xa7\x9b\xd6\xbfh/\xcb\xf6o]\xe7?\xb5l\x839\x0bq\xe6\xbf\xfe$y\xd5\xbd\x91\xde\xbf\x0e\x00"MLI\xe8?^D[$\x88\x1a\xe4?\x17\x88\xd5P\xba\x07\xa6\xbfQ5\x7f\xb2\xa6K\xba?\x03KT\xdai/\xc3?\xb1\xaaw\xb2\xff\xa0\xc7\xbfCh1\xff/\x8b\xfa?\t\xabs\xce\xbe\xd7\x92\xbf_2\xaa\xa8\x17A\xf4?9\xfe\xde*"u\xd9\xbf8\xb1\xd2=\n7\xab?y\xc8@\x16Vl\xc7\xbf\x87\x95\xbe+X\x94\xc4?T\x98\xcdzu\xd9\xe5\xbf\xbc\x0f&f\x1a=\xec\xbf\x16\xd0E\x12v\xb8\xe4\xbf\x9d\xa9\r\xae2\x08\xf0?P\xbd\x9ee\xd9\xe4\xd6?\xa4\x94R\x9f\x13\xef\xe8\xbfX\x8d\xec\x17\xbd\x1b\xc6?\xd6\xe0\xf4\x99\x8cz\xd8?\xb9\xf37\t\x8a\xdf\xb7?\x0f.\xeau\xcf\xdd\xd6\xbf\xaa\x1e\xd1\x8e\x177\xd3\xbf\x1d\xe0(\x95\xb7\xfd\xd9?\xad\x98\xa89q%\xd2\xbf\x1d\x91\xa1\xc4e\x1c\xdd\xbff/\t\x0b\x9e@l?\x01m\xe9\xb3\x91\xfd\xe7\xbf\x95\xd2\xdb@%X\xf0?\xda\x9e\xf5g\x85\xfd\xa5\xbf\xe5\x1a\x16\xa7\x93\xef\xbf?B\xc2~_\x91?\x98?gw\xcbi\xa3L\xc3?|\xca\x14FN\xae\xc7\xbf\x0c!\x0e\x9b\xfde\xe8\xbf\x05\xcbzt2\xc7\xc6?G\x10\x91\xae\xf3\n\xd8\xbf\xa8\xfb\xb9\xa4R\xe1\xd4?\x18\xd3\xe1\xa0\xe6\xfc\xd6\xbf%*\xa54\xbcG\xe3\xbf\xce\x00}\x85\x94\xc8\xe2\xbf(4\xe6\xce\xc7\x0e\xd6?\tm\x18\n\xac\xc2\xe7\xbf\x92\xeb\xad\x90T\x96\xd0?[*=\xe4\xf9\xc9\xc4\xbf\x1b\x93\x9d\xceLT\xd5\xbf+\xfa\xda\x90\x13\xdb\xc5\xbf\xd1\xa6\xfe\x91\x18/\xd7?\x9f\x1c\xd0\xb4\xda\x02\xeb\xbfd\x05\xdcx\x1d\xa2\xd8?z\x1d\x91\xa3_\xae\xd1?\xfb\x92\xb5\x7f\x19(\xe6\xbf\xad\xb4\xd5\xf7\xb87\xda?o?\x16N\xa4i\xed\xbf\xb3\xebW\xc4[\x9d\xea?b\xe7\xa5h\x1b\xdb\xcb?\xe1\xf0\x84\x13{\xc9\x9a\xbfz5\xa8\t\x8b.\xd9\xbf\xd3\xe4\x93K\x13\x01\xfa?\xc2\xb6\xfeP\xe35\xdb?\xc0\x1c\x14\xe3\xb1\xb3\xde\xbf\x10\xbc\x9d\xc5\'J\xec\xbf\xe2($\xc8\x9a\x9f\xf1?ApU\nA\x1a\xce?5W\x0ef\x15\x0f\xe6\xbf9\xba\xa6@Wv\xcc?\xbd\x85}\xb6\x02\x9e\xe7?\xd9N\x9a\xf0\x81\xd5e?\xa3&\xbc/\xaf\xff\xa1?\xae?`\xa9\xca\xe0\xc3\xbf\'\xe0\xa5@f\x8a\xd2?\xfbbbr\xc7\x98\xab\xbf\x94\xc1\xe303\x18\xe4\xbf\xc5;\xcc\xf7b\x18\xf5?H\xc7<\xe5\xb4\xb5\xee?\x01\xe9I\x7f:\xd9\xe0?\x029\xbcIi/\xd4?\x02\xad_\x92\xbc\x8e\xef\xbf\xa7\xa1H7\xbb>\xba\xbf\x9d\xa60\xe2\xbf.\xdd?\xe5y\x0f5\xc0Z\xf5?\x02-\x92\xdd]\xf4\x95\xbf:Vq\x87\xd7\xbc\x96\xbf\xed\xdaB$h\xc1\xdd?/f\xe3-\xa4\xc3\xd0\xbf\xdadZ9\x143\xe6?\x8e\x1a-\xfdX\xad\xc2\xbfLS\x15\x94\xb8\x03\xd8?\xa9\x80\xb1,\xdb\xb6\xe4\xbf2\x8cY,\x86\xaa\xe4?1\xad\xe9\xa7\xaar\xe7\xbf\x02\xf0\xf7\xb9 \x1d\xe2\xbf;\x06*\xd5\xcfT\xf0?\x18\xb0\xde\x9b9\xcf\xe5?\x844\x99X\x9f\xf6\xc5\xbf\x18\xads:\xa9\x82\xe1\xbf\x898\xd4\xae\xb2\xc6\xe2\xbf,3>L\xaax\xe9\xbf\xf9L{\xe94\x9f\xef?\x81?\x8a=\x07$\xb4\xbf\xce:\x18\xe7\xd1/\xe5?\x9f0\x7f\xab\x810\xc4\xbfP,\xc7\xf5\x8d\x9e\xec?o\xea}\xbbg\xa6\xd2\xbfd\x0b\xa0\x08~\xca\xf4?\x124\xb0l`\xbe\xde?(B\xda\x9f\x12Q\xd3?\xc9\x99\x1d\xfe\x15\x1c\xe6\xbf\x16OS\x17\xe2\xda\xa9\xbf\xef\x1d\'\xf9\xd7\n\xd7\xbf\xc9#w\xf3\x13!\xe3\xbf\x10z~\xd8iv\xf2?_\xfc;\xf6b|\xe1?\xec~\xe7\x027\xc2\xf1?\xefx\xe7V\xd2\x1b\xfc?\x84_\xa5V\xe5L\x01@>\xd42\xf8\xf1\x17\xf2?\xfb\x9b\xa4\x19s\xe5\xd9?\x92\x16\xbdnr\xed\xc4\xbf=\x1d\xdd\xe5\xc3\xbf\xe4\xbf\xb6P`\xcc\x9c\xe7\xba?\x92\xcaB\xcf\x8b\x8d\x93\xbfLsB\xa3TQ\xdb\xbf\xd9\xb0MY\xe8\xd1\xd6?\x84\xe8\xc4\x9e\xd1\xb3\xd0?\x81q5\xcdz\r\xe8\xbf\xbf6\xf2\x92iL\xe0?\xe4\x84\x9f\x077\xb9\xa8?\x80\x08\x00\xc4K)\xe2?5\xc0F\xb4X*\xf2?}\xdc\xec@\xf9\xaa\xa6?8b\x99\xbf3C\xd5\xbf\xb3A\\\xec\x07\xad\xea\xbfD\x01\x03T\xf7Q\xcc\xbfn6\xf8\xde\xfd+\xe1\xbf\xbf\xb0`:K\xb3\xa6?, h\xe0\xa1*\xe4?\t\xde\xfc\x0b\xcb[\xfb?\xd9\xe5\x01\x91\xd2(\xd7\xbf\x15\x10:\xf6\xc3\x10\xde?g\x04\xe3\x10\xe0p\xed\xbf\xfa\x1f_\x02\x90\x89\xf6?g*\x8a\xce\xf0~\xf7?\x19\x0b,\x10\xe22\xe7\xbf\x16?\xf6t\x15\xe6\xec\xbf\xdc/ \x16\x0e]\xf0?\x84\xbe\xb1neo\xea\xbfbq\x91\x8287\xe3\xbfx\xb7mU\x07\xfc\xce?g\xcb+\x0c}c\xe3?T\x06H9\xccX\xd3?\xec&I\x9c\x1b\xb2\xe4\xbf\xf6\xf0`\xd16\x9d\xd1\xbf*E\x1f0!\xab\xd1?U\x8d2\xf9_\xab\xf5?\xc4\xcb\x1c\xef\xa7\xb2\xcf\xbf/\xaa\xea\xfe\xa8\xcb\xb6\xbf\x118{\x97\xad\xc7\xd2?\'^\x90\xff\x16\xd4\xa6?^\xaf|$\xbe\x05\xe2\xbfVbRD\xe3&\xd5?\xeab\xaa\xccy2\xde?W\xe0}^\x9e\xd3\xe6?IkM\xa6\xeb\xff\xcb\xbf|\xb3\xe1\xccz\x1d\xc1\xbf\x9d\r\xa8\x9c^\xd5\xeb?i@\x0f\xd0\x96\xc5\xdc\xbf\xf7\x81\x93;\x8d+\x9b?\xb3\x85d\x08<\xef\x9e\xbf\xfd\xea\x02\x99>\x01\xe5\xbfN8Y\xa7\xaf\xba\xe5\xbfQ@\xf8|4\x88\xe5\xbf\x81\xee\x86\xc7\xbd\xe7\xa0?\xabXh\xdd\xb1,\xe0\xbfU]\xdcZ\x7f\\\xf7?\xe6;\xccX\xbdV\xc9?\xc2\x9f_\xe6\xe9\xf0\xe4?J\xd3_0\x98\xc1\xd5\xbf\x9c2d_\xe2\x16\xd4\xbfdx\xd28f\xd5\xbc\xbf\x15\xf9<\x07T~\xf3?;\xd7\xe1Y"}\xe4?\x9a1\xbe\xf1^\xa6\xdb?\xc6\xc2\x9a\xde\xf4\xdb\xd9?\x8fPi\xd8]\x97\xc2\xbf\xca\xe9\x02\xcew?\xe5?\x04<a\xec\xfd\x9e\xcd?\n\xc0\x95\xaay$\xb5\xbfo\x95\x807\x8b\x12\xcb\xbf\x7f\xe4\xd8=\xeav\xe5?U\xb8`w\x1b\xd8\xdf?\xc7\xf7\xc0<\xe2\x9f\xf5?\xfc6L\xd2\x00\xd3\xdd\xbf\x02=\xea\xa7\x1b\xe5\xc6\xbf\xaa\xd7H\xd7\xe1:\xeb\xbf\x95?\x19n\xc7\xbf\xc5?\xde\x95\x07\r\xd2T\x9b?\xa1\xbc\xfaJ*k\xe3\xbf\xb9\xac\x90\xc1\xb3\xf0\xd0\xbfzz"\xfe{\xc8\xe1\xbf\x9c\xda\x93\xd6\xd6R\xf5?\x87\x0bRI\x1c)\xb7?\xfb\xe2H5\xae\xa7\xdb?\xaan\xec\xb6+y\xe9?\xc6\xdf\xd75\xaf\xd6\xc2?d1\xda\xe7 \\\xd6?\x99\x1e@F6g\xfc?>\n\xa9\x0fD\xa2\xe0\xbf4\x92\x1f\x13\x97.\xec?\xa2_\x90\x0b\xbf;\x00@\x8d\xba~\xb4\\\x88\xf0\xbf\xdd\xe7ie\x08\xc1\xd8?\xcam\xc0\x9c\xbfN\xe9\xbfm\xb8G\x80\xc2b\xe2\xbf\xbd\x8b\xb6\xcf\xb5\x1f\xf5?\x93\x03?J\xd1\x1c\xc1\xbf\xb0\xc8,]\x8d\x16\xe9\xbfR\xb0w\x90\x7f\x87\xd2\xbfb\xe9\xcdu\x90\x9e\xe2\xbf\x0b\xaflK\xd2\x83\xc9\xbf\xa2F\x0f:x\xf9\xf0?\t<,\xebT\xf0\xc7\xbf\x81(>\x1c#U\xb7?C.\xd4~\xf5\\\xec?\xce\xf2w.\xb7\x94\xa9?\xbd\xcb\xdf\xac0\xfds?\xed\xaa\xc8/\xa0K\xe1\xbfW\x08\xb5\xb5u\r\xed\xbf6\x0b\x0c\xda\x92\xc5\xeb\xbf\x0e0%\x93\xd1\xd0\xe5\xbf\x0f\x98k.A-\xe6\xbf\x0e\x8c\xa8h\xcd\xfe\xc7\xbf\xc5Z\xcb\xfe,\x90\xe3?\xa2\x94\xacE\xcd\xbe\xee\xbf\xc7N\x84R\xe9\x9f\xe9?\x15; xs\xa1\xed\xbf\x90{\xd1\xd9\xb5\x99n\xbf<\xcf\xe3\x98\xe5\x11\xf8?\xf7\xbf\xa3#\x8c\xe6\xc6?$x\x9aM)\xd2\xe3?>I\xb1?y{\xcd?92m\xc5\x0e\x11\xd8\xbf\xfb\x1a\xd1\xa0\x97\x90\xd6?\x90\xe4\xa7I\xf2\xa8\xc9\xbf\x18\xd5\x9c\xa23?\xdc?\xb0\xf2oV\x00\xbb\xdb\xbf\xe8\xaf"\x0f\x93\xf1\xb6\xbf\t:\x03\xfa5\xc5\xd7\xbfl^I\x9aLZ\x9b\xbf4\xab,`\'\xde\xdf\xbf\xf8\xae\xbe\xa6\x0f\xb7\xd9\xbfL\xc9\x8b\xd4\xd3\'\xa9?nCk\xd9s8\x94\xbf\x84TU\x8bSu\xe2\xbf\xfcr\xc7U\xdf\xc2\xe6\xbfMB\x15\xb3\x94b\xa0?\xdb\xe3r$\x9d\xbc\xc3?rl\xa1\x0c\x89\xee\xea\xbf\xb3\xb3RfE\x88\xdf?\xf8\x18\x02\xd3u\x8d\xf2?\x0f\x0c:J\xea\x9d\xd2\xbf\x17\xb9\xaf\xb5^%\xf8?(3\xa4\x88Yg\xd1\xbfLTf\xda\xd6F\xf8?\x9a\xa5i=s\xb6\xe6\xbf\xc1\xe50\xd8b\x8c\xed?\xd0\xcf\x1c\xb0\xc0q\xdd\xbfkw\x04,Ee\xb9?\xc4\xaf\x13\x06M\xaf\xd1?\xef\x93\xa0.\xc1\xa7\xe0\xbf&\xefF\x18s1\xed\xbf\xdf\x9e{\xb5\xca0\xd3?[\xba\x8aHw\xdb\xd0?BH\x97\xe5S\x1f\xeb\xbf\x1c\x00c\t_\xb7\xd3\xbfG$\x06x\x82<\xe1\xbf\xdb\x9e\xaf\xbd\x12\xe0\xc6\xbf\x02\xb3\x1dK\xf1\xf7\xe2\xbf\xa2\xf9\xb7b\x98%\xe0?ha}\x89\rf\xca\xbf\xdc\xf2\\x\x0bk\xe7\xbf\x9e\x7f\xa8\xde\xb1\xa0\xe1\xbf5\x16\xb2h\x13\xe1\xd8\xbf\x0efWU?\x7f\xe6\xbfg<\xb7K\x94\x94\xd7?\x8a\x8e#\xa0X\\\xd2\xbf\xff\xf0\'\xae\xf3\x0e\xd1?\xb0z\x93\nX\xa8\xbd?\xd6x\x1f\x1f\x07\xca\xd3?\x83\x01\xf4{\xea>\xef\xbf\xc8=\xb4\xec\xa6?\xd5\xbf\xb7( \x9c?\xe7\xcd?\xc3J\x0c\x04w\xf4\xe6\xbfI\xc9\x1c\xf5\xbd`\xb9\xbf\x12\xe9\x93\x82\xfc)\xc8?sD\xcf\xb5w \xe8\xbf2T\xc5\xc2a\x00\xe4\xbf\xbe\x9b\xa0\x9f6\xd7\xc1\xbf\xcb!\x10\xb2\xfa\xd5\xe5\xbf\x80\xea\x06\xc9\x8ak\xd8\xbfm\xdd\x126\xf4\xd2\xcc?\x17\xfaT\xec\xfem\xa6?M\xf4\xa4A\xdc\x11\xc3?\x12l\xe9\xdeb\x00\xac?6\xeeI,\x88n\xe9\xbf\x98\xf7\xbc\x84\xf7\xe1\xa8?\xe8@b\x9eqT\xd9?\x0c\x06Xf\x96\xb6\xd9\xbf\xe86V7X^\xee\xbf\xd5\x84$\x91\xfd\x93\xdb?\xba\x14\xd2\x173\x96\xf1?\xebt_.|\xdf\xf8?\xbc.\x10\x08\n&\xc9\xbf#\xdb5\xf6\xf62\xec?>\xfcb\xa7\x00l\xee?\x1b\x89\xd5\xc1\x16\xde\x8e?\x99\xeb\xdeF\xf6\x08\xee\xbf\x93\xfa\xda"!\xd3\xeb\xbf\xddAl\x1d\x03\x05\xe8?\xda\xdf%\xbc\x0e\x7f\xd9?\x16\xd9\x0cD\xd8s\xe4\xbf\x0e\xc1\x169\xa0$\xd8\xbf\x91\x06`\xd7FG\xc6?KVq\xda\xed\xbe\xd0?\xd5\x92m\x9b\xc3\xda\xfd?d\x13[)\x8f\xb6\xfb?\xe2X\xfcY\xc1\x1f\xb6\xbf\x0c\x90\x0b\x165U\xcb\xbf\x9e\xa7H}e<\xe2\xbf\xdf\xd6\xd0Y\xb6\x04\xd4?t\x98\xa5\x87\xc9\xdd\xf6?]\xa5[\xafa\xea\xc4\xbfI\x9b\xe5\xd6\xdfs\xe6\xbfg\xc0c\x18k\xed\xe5\xbf\xba\xd3*\xb9\x01\x1c\xd2?\x11\x86`\x8a\xd8\x19\xb9\xbf\xea\xf5\n\x960\x8a\xd2\xbfo\x1c\r\xd8\xf1\xae\xb5\xbf\x9a\xd7/[\xc3\x0c\xdf\xbf{]\x17\x06\xa2/\xbf?\xa9J41\x163\xe5\xbf\x10\xd2\xb1_+}\xec?\xb2.\xcd\xfa\x0b\xa7\xd3?\xc4q\x97\x10H;\xb7\xbf1\x92\x8e\xd4V\x93\xcd\xbf\xc8\xe2oN\xa6h\xf3?\x92\xa0nqZ\xcf\xe6\xbf1\x07\x14\xb6\xd9\x8c\xe6\xbf%\x15\x13<B\xee\xdd?S\xe1U&\r\x1d\xe7\xbf\xeb\xc42\x1b\x93=\xac?;-\xa8}\xcd\x91\xe2\xbf\xff"8)\xc9\x98\xe9\xbf\tA<9\x13\x1c\xdf\xbfwj\x96%\xd6\xc0\xe1\xbfPH\xe4\x08\x8f\x93\xfd?9\xf3\x02\xc2\xac8\xd5\xbf\x08\xad\x96W~\xc2\xdb\xbf\xad`\xc0\xc20\x12\xd3?\xc3\x0fN\xe9\xd81\xcf\xbf\x05\xfc\xb6\x8c\xcb9\xc4\xbf\xe4\xfeK\x9b\xa4a\xe2?\xb9`$\xdc\x9d\x9e\xdf?\xab\xb7\xe4e\xff+\xe1\xbf\xb9\xb1%Fx\x9e\xd7?\x86\x9b\xaf\x13\x0b\x84\xe4\xbf\xc6\x95\xc3\x1a\xea=\xe5\xbf\x0e_\x16,\xf7\x8f\xbe\xbfZ\xbb\xb7\x95\xbf\x07\xe4\xbf\xb1,\xb5\x805\xaf\xd0?\xce\x88\\\xed\x93C\xf4?\xbb\xbd\xc8~0\xe0\xec?\xbeKx\x96%\x1e\xf1?\x0e\x11\xff\xaf\x13N\xd3?\x94\x89\xf6\x8a?k\xb9?P\xfa\xbd1\xf79\x80\xbfo\xad\xb1S\x91\xf6\xb5\xbf\x93HY\x1e\xa0\x80\xd0\xbf\xe3.\x95\xb1\x1f\xcd\xa1\xbf)\xa5\xe9)\xb4\n\xd9\xbf\xff\x0b\x8d\xb6\xc5_\xdf\xbf\xcd\xf9D\xaa\x82\x9c\xea\xbf\xbc\x9ep\xb0O\xbe\xd2?\x86\x90\x96\x07\x13\x07\xee?\x11\x9e\xd6B\xd4H\xe9?\xe1!}Z\xf6\x85\xd0\xbf~&\xa5|\n\xf6\xe0?<\x8cP6O\xc5\xec\xbf\x8e\xd5}\x0b\x9eK\xf0\xbf\x11\tb?Q4\xdf\xbf\x9e\xe3\xbaZ\x83\xa0\xea\xbf\x13\xfa\xbc\xef-\xfd\xb3?I\xa2\xfewm\x9d\xdd\xbfW<\xe9%\xb9\\\xe8?\xc9\xaa\xacizB\xce\xbf\xc2\xa9\xe3\xfdK\xec\xe3\xbf\x01\xb0c\x8e\xdd\xee\xe4\xbf.\xb1\x9d\xb4J\x95\xcc\xbf~\x8b\xe2(\xcdz\xd9?\xb1\xf2\x9eC\xb5\x12\xeb\xbf\xe4\xd9H\xad\x15\xf3\xed\xbfN\x93\x97\x88\xb2\xb3\xe3?t\xc5\x8cUE?\xd8\xbfR\xb1U\\y*\xd2\xbf\xda3\x91\x96\xbdC\xc4?\x83\x8d\xda\xb2\x07<\x95\xbfz\xab\x01s\x11\\\xc3\xbf*\x17\x07\\\xeb\x89\xe6\xbf{=\xd8\x84<p\xd5\xbf\xf3\x8c\x0f\xfc\xd9\xb0\xde?\xd9kIR$^\xe4?n\xf6\xafV\x14\xf3\xd2?\xa7\xd8\xd9!\x9a\xed\xeb\xbfX\x81VJTg\xc5\xbfK\xa9]\'\x06$\xba\xbf\xc2h\x07y3\t\xc5\xbfHR\xb7\x97\x00\x1d\xf5?b\x10\x0f\xf0\xbbR\xe9\xbf\x83\x9e\xcb\xc5\xfd\xd3\xd4?\x892\x03\xac\xb9I\xd8?\xf6n\xa2\x97\xfa_\xe7?\r6\xf2\x1c*\xa6\xc3?\xb0;V\x1c\xf7\x1f\xe0?\xb6\x93nv\x9c\xdb\xc2?\xb9\x01\x8d\xb6\x9dj\xb1?<|gp\xab\x90\xea\xbf\x9b\xa4\xf9\xd8tf\xe5\xbf<%\xa3\xbf\xbd\x19\xe3\xbf\x01\xf3\xbc\x97\xebz\xde?\xe3\x140>C\xc1\xe4\xbf\x86$\xc22 \x1b\xd5?\x94\x04-\xb5\x0bK\xee\xbfy\xd9\x91>\x8c\x05\xf2?A#]_ \xc0\xdb?}\x99)\x18[\x81\xd6\xbf\xb4\x1cH\x9c\xf5P\xee\xbf\x83\xc3Fk\xa7\x14\xf0?\xf68\x90b\xfc\xb3\xc6?\xfb\xcc\xe5?\r\x1c\xbb?=\xc3\x8b\xd3\xb2\xb6\xe8?\xbd\xbf\x0b\n.\x90\xb6\xbf\xe38\x80\xb2\xb8\'\xec?.\xa7j\xc0S\x1c\x94?\xf6\xe0\x17\xb9\xc5\xb4\xec\xbf&\xef\xee\x96\x96A\xaf?\xc6a\x88\xdc\x83}\xcb\xbf\x1f\xec\x15\xa3H\x0e\xf6?Ho_\xbc3w\xf6?W\xd3\x9d\x12\xfc\xa5\x80?\x81\xe8/4\xa7\xe8\xe0\xbf\x1a\x9e\x8bJU,\xe8\xbf\x8bj\x15%\x8e|\xf0?\xef\xcaf\':\xec\xc7\xbf\xa7^E`N\x16\xe1\xbf\x8e\xd4\x89\x98\x19\x87\xcc\xbf\x1d\xb3l"\xe3\xec\x90?\xd5B\x8b\x19\xba\xec\xed?EV\x08Smi\xc3?K\'\x8f\xc9\xa4\xf9\xbe\xbfd\\\xfa\x88\xda\x07\xec?\xc1\xf1\xd7Uj\x8f\xd9\xbfU`\xa3U\x93\x82\xe9?\xec\xaf\x839\x84z\xf0?\x19fI\r\xd2\xdb\xeb\xbf\xa8\x8c\xca\xb7%\xf9\xf6?\xea\xff\xf1|\xd8\xde\xe7?\xb6\x0fhJ8!\xf0\xbf\x8d\x0f\xd5\xbeD\xe3j?\x91\x96g\x9cR?\xe9\xbf\x16\xdb\xd0$[\x8d\xe4\xbf;\xcd\xc4\x87\xf5p\xdd?.\xb5#\xa9\xa6\x8b\xd4\xbf\xc8k\x95*\xf4\xf9\xe7\xbf\xda]{D\xed\xf1\xd9\xbf\xaa\t\xd7\x1fm\xeb\xea?\x9f\x83k\xb1;u\xc7\xbf\xcf\x9b\xc1\xec\xa3\xac\xf9?&\xe4\x1f\xc6\xdeL\xcb\xbfj?\x0f?\xdc\x89\xe0\xbfs\x88\t\xe10\xf7\xf1?\xf1\x10\xeb\x91\x03\xb3\x92?c\x13-w\xcd\x1f\xe8\xbf\x98\xd9\xf3\xe1\x16\xf8\xf0\xbf:\xc2\xf4?lH\xe8\xbf"\xea\xaf\xcd\xe9\xc4\xea\xbf\x9b\xeb\xca\xa5!\xa6\xe5\xbf\xc2\xf9\xe3\xfa]Y\xdd\xbf\x16\x0c&\xcbcL\xe2?3\x16\x14\xb1\x0b\xec\xcd\xbf\xe6\xec\x912\xe8U\xdd\xbf\xa0\xf4\x82\'\x10y\x9d?-\x84D;{\x9e\xeb\xbf\xa0G\r3\xa6n\xb9\xbfXAy\x8e}`\xfd?u\x13\xeb\xe2\xe4i\xd1\xbf\x13\xa5+\x02f[\xce?M`g\xa0\xd4\xa9\xd8?\x03b\xc4\x07\x84{\xf2?\x82\xc1\x1e\x12\xd0\xda\xd9?\x0c\xf0_\xf3\xaaT\xe8?\xca\xc6\xc1\x16<\xdc\xac\xbf\xc6\x07\xe0])\xb8\xdb\xbf\x9d\xa2\xb79^q\xd0\xbf\x07\x13\x86\x907\x8b\xe8\xbf\t(\x83\xdc\x9f\xde{\xbf\x178^`\xb8\xba\xc1?\xa9\xf5OtDD\xd9\xbf\x8d\xc5G\xc6V\xcc\x94?\xf3\xfc?\xa2H\x98\xcc\xbf\xb6\xf8\x06\x1d^\xc7\x9d?\x80\x9f!\x83\x17\x13\xd3?\x03\xdc:\x92\x86\xff\xd6\xbf\xde\x15\xf5\xeaIQ\xc2?\xb9\xa9\xf1\xf0\xfc\xe7\xe9\xbfTl\x920\x1c\x18\xdb?\'\xef\x00\xf7(\x83\xf3?tQ\xe2\xca\x19\xa9\xa8\xbf\xf9D\xe6T\x048\xe1\xbf\xea{\xfc\xa9Z\x00\xda\xbf\x14\x83)\xb2\xc3r\xd1?:\xd73\x86~*\xe8\xbf\xebu\x1f\x9d\xd6/\xea?5\xf1K9\x84\x87\xdd\xbf \x97$\xfa\xa3\xc8\xdb\xbf\x88Wy\xd9\xa0\x12\x00@\xc0E\xde\x8d6\x99\xcc?\x81\xba;\xa9\x85=\xec\xbf\xfb38\xbbiy\xea\xbf&s\x0b\n\xed/\xe1?\x9f\x15\xaa\x13>*\xe1\xbfB\xdc\xd4\xe5Y\xc7\xe1\xbf\xdf\x1e\t-\xd4\xe8\xe4\xbf\x92\xe7\xf8\x91o\xce\xc5?\xb8\x95=\xf9\x08\xbf\xb9?\xaf)\x19^3\x8b\xea?\x0e\x13\x8d\xe6\x837m\xbf\x10\xaas\x8f\xb6\x86\xdd\xbf\xe0\xfar\xd4\xb5\xb4\xe3\xbf\xe1\xf6r\xb8B3\xbc?|N\xd9\xe5\xad1\xe2\xbfX\x13@\xa9\x15q\xb0?\xc0\xc4\xae\xf2\x0e\xcc\xce\xbf\t\xe9<\xe13\xe8x?E\x1f\xae\x90\xe4\xee\xb1?]\xdc\x0f\x0c\xe4\x90\xce\xbf\xfb\xa6\x08\x10\x9fv\xf0\xbfy:*t{\xee\xff?\xf3\xf1\xab\xe7>\xc0\xcb\xbf\x00\x02\xfe\xae\x99\x1d\xe5\xbft\x1e\x8c\xf9@\xa9\xab\xbf\x9c\'\xfb\xff\xef\x0e\xdd?\x82\xd0\x1d$|\x01\xea\xbf\xf1\xb9FQ\x9b$\xe4\xbf\xb5\xf9\xb3\x83\xcd\xcd\xcf?@\xbf\xe4\xc5\x96{\xcb\xbf\x8d\xfa\xed3wf\xd0\xbf\x9d\x8f\xe4\xf1X\x9b\xb9\xbf\xfd\\s\xd8\x9ds\xcb?\x0c\x13\xb9\xdf\x15L\xa8?\xf3w\xeaZ\xe2J\xa3?\x00\xa3\t\xd4x\xe3\xd2\xbfQ\xc1\xc4\xda*\x81\xad\xbf|\xf4\xe4\xab\x10\x97\xb5?\x9bEP\xdd~a\xe4?\x12\xd1\x1f\xf4Z\x8c\xed\xbf$\xd9\xac\xb2\xa0\xc7\xf3?Z\xbe\x10\x16\xac\x9b\xe9?\xc4\xe5\x17\xf6\xa9\xe6\xed?`\x0c\xd8\xe2\x0c`\xc4?\xaaB\x9dzd1\xf6?\xb9\x87\xc7\x16\xbe\xd7\xcf\xbf\xe1(\x13s3\x92\xb4\xbf_\x05\x8d\xef\x94\x13\xf0\xbf\t7K\xb9\x96-\xe0\xbf\xfbz\xbf\x94\n\xbc\xe6?\x8e\x18\x9d>\xe2\xa6\xe0?\xaf6)\xd4\x05b\xe4\xbf\xec\xea\x9e\x1fuL\xe0\xbf\xa7_\xf1j\x91\x15\xda?hg\xc1\xdcxX\xd7?\xc1\xe6\x06\xe4KC\xf4?R0i$\x85\xc1\xf5?\x9e\xe7\xf4o\x073\xcf?\rU^\x91`\x0b\xd1\xbf\x7f\x15\x81l.\x15\xb7\xbf\x8d\xca%\xf0\xfaR\xd3?\x89S\x8c\xaa\x08\xa3\xea>V\xb6Z\xd2\x92\x93\xcd\xbfW\xb4\xca\xb4\xdeJ\xed\xbf(?\xc0\xd0\xba-\xcc?2\x91\xcf\xf6\\\x89\x9b?\x99.\xf5-\x01\xc3\xbc?}e\xecx%\xa4\xed\xbf\xcd\xc0\xc5!\x1c\x8b\xc6\xbf\xa4tv\xa4fG\xcf\xbfo\xd7\xa2Z\xb6\xfd\xe1?y\xfe\xc2a\xed\xa1\xea\xbf\x89\x16L\xe3U\x0e\xf0?\xd3\x89\xef\xa8i\x90\xbb?&\x15\x07\xa1\\\xa9\xd1\xbf\x87\xf4\xcb\x0b,\xaa\xf5?\xd6\xc8\x9fOE\xbf\xe6?\x9bM9/&\xf2\xe6\xbf\xe6\x1b|\xf3\xc6\xb4\xea\xbf;\x99\x98\x1d#0\xc6?\xcd\xcd\xc8\xfd\x9e\x14\xe3\xbf6\xf5\xe3E\xd5\xdb\xcc?\x19L\xdf\x1d\x03\xa9\xe2\xbf~R9\xacQu\xe8\xbf\xa8\xef$uO\xd5\xc2?\xa2]W{1\xe0\xe6\xbf\x98\xe9#J\x87&\xe3? zTV=\xd0\xc3\xbf\xd17\x165?5\xe6\xbf8\xd2\x9f\xe2I\xee\xe6\xbf\xb6\x96/p\x94/\xc3\xbf\xa5\xabn\xff%\xc1\xe0\xbf\xc93!O\x9f\xd9\xcb\xbfc\xad\x8e\x9c\x95\x16\xe0?\x81\xc4b\xc1\x1b\xb4\xf3?\xb2PbK4\x17\xe3?\x14\xdbRYn\xb9\xde\xbf\xc3t\x80H\xc7\xa4\xe5\xbf$\xbfY-%6\xe3\xbf\x84\xf2\xb4\xcf\x07~\xed\xbfS\x86\xb3t8\r\xd5\xbf\x1ai\x87\xc6!V\xd4\xbfh|\x8c\xf4g\x8c\xe5\xbf\x1bF)x\x9c@\xf0?\xbc\x14\x95\x85\xc0\xca\xdb?k3\xf9w\x7f\xc9\xc3?_\xee\x9c\xa1@\xd7\xf0?\xe8\xb5L#E{\xd5\xbf\x87\xf7\xce(\x86b\xbf\xbf*\x01;\xd4qO\xd3?\x1e\xe9_`\xa6\x07\xe2\xbfz<\xc8\x1f7\xb3\xa0?\xbf\xd0-\xb6b\xc9\xea\xbf\xcd\xaa\xb9\x82\xc1\x84\xa3\xbf\xcd\xae\xbf\xb5\xc1\xee\xd4?\x0f\x87M\x05\x93\x7f\xe4?\xdd\x15\xe3\xe3\x15\xe7\xec\xbfu>IQ\xfd\x83\xbc?\x95{\x82\xd5\xf1\x10\xdb\xbfF\xb5\xb9~\xe56\xef\xbf\x936$\xdf\x16:\xd8\xbfp\xc0\xb0\xa7N4\xee\xbf\xd9\xdf\xdd\xef\xdc\x07\xd5\xbf\xef\x11\xcd\x05V\x06\xe6\xbfv\xe4\xca\xf4P\xbb\xd0\xbf\xbc\xa9\xd6\xfed\xfd\xcb\xbfS\xe97V\x1a\x11\xe7\xbfb\xbcs\x0f\xde^\xf9?\xb8\x1b%\x8d\x95\xbb\xe6\xbf\xb0=:d0\x0e\xea\xbf\xfc\xb0\xab\xc3\x94*\xea\xbfg\xa6\xd2\xac\x9e\xc1\xed\xbf\x1a\x0cn\x87f\x1b\xc5?a\x85-\xc4\xd0\xb8\xc2?\xb8\xeb\xeb\xf9e\xb1\xe4\xbf\x9f\'\xd8\xf1\xb4\x9a\x87\xbf\xb1P\xdf\x91?\x95\xe2\xbf\xb5\xca\x9f\x9a\xbc\xc7\xd3\xbf\xda\xa1\xa0[r\xcb\x9b?\xfa*\xe0R|\xe9\xda\xbf\xbd\n*\x84\x82\x9f\xe4?\xc1\x83\xb1JS^\xd5?\xdci\xb2\xa9\xec\x14\xf1?\xee\xed\x0b\xcc\xf6\xea\xd9\xbfn\xa8\x97?\xe0(\xb4\xbfB(-4\x18=\xd4\xbf\x1fr\xd0\xa6\xb1\xb0\xd2\xbf\x04\xa8\x9eh~n\xf6?(\x7f\xc9\xc7\xb9*\xec\xbf\x91\xec|\xfe\xc6\xd9\xe3?\xe5\x11S\x1b\xca\xd9\xc1?\xc6\xcbe\xd9\x8b\xfe\xe9?}\xd1^\x88\xa4\x8f\xd7\xbfy\xbb\xc4U\xd5\xba\x97?}Pb\xadJ)\xa7\xbf\xb0l7a}\x8f\x8f?\xb4\x9aZ\xb84\xd0\xe9\xbf\x1d\x7f\x9b\xe0u\xc1\xe4\xbf\xc4}\xe2\x92\x7f\x7f\xf0?;9\x1ei\xc1\x13\xd7?\r\xe6C\x8a\x883\xe5\xbf\xf6\xe5\x92}49\xf0\xbf\xcb\xbdU\xe5\x05\x07\xf1\xbf-\xeb\x9fN\xcb8\xf1?\xa8\xdb\xc1(_n\xee?6\xcb\xdei\x0f\xc3\xe6\xbf\xa9\r\xf3\x80\xb5%\xef\xbf\xa3j&};<\xcc?\xdc0\xb4\xe2\xb9\xf0\xc7?bs\x06\xdbyQ\xe0?\xfe\xe3\xe2\x9a\xdc\xec\xf0?h\xf6\xd1\xac\xcb\xd3\xc4?x\x9e\xde\xc7\xc2\xae\xde?\xae\xad\xf2\xcbr\xc9\xe5?\x9aP\xd1?\xd0}\xef\xbf\xf4\xf7\x91\x9b8\x9a\xa9\xbfm\xe5\x15n\xa6\xff\xe1\xbf\xf5\x92[\xe109\xf1?\xe3A\xb2=\xba\xc8\xd5?\xa8z))\xb6I\xab\xbf\xd7\xb8\xec\xc6\xe1\xe5\xde\xbf\xaa;I\x84\xae2\xd2\xbfbQ~\xf5\x96\xa9\xe7\xbf\xf1(1\x0cF\xe9\xa4?k\xfd\xbf\xb7%h\xd4?\xe6\x1a\x8f]Sk\x83?\x15\xab\x10\x0b\x99\xc3\xe6?\x90\xe4\xe0\xb3\xdd\x14\xaf?\xb2^\x1a_%\xbc\xd7\xbfh]\xccq\xc9\xe2\xe9\xbfb&y\xb6\x8b\x85\xdd?\x98\xb0\xef\xf7R\xe4\xe2\xbf\xe4s\xf2\xbf6\xac\x03\xbf\xd8j\xd6\xa84\x91\xb7\xbfXTbi\xde(\xea\xbf\n9u\x18M\x8c\xd6?}\xeeN\x84\xd15\xe0\xbfE\t\x0fD;#\xe1\xbf\xe4\xf8\xbem\xe8\x1f\xb9\xbfe\x10;\xf3&H\xe4\xbf\x84\xf4\xcd\xfc\x12f\xdc\xbf\xfef\xa1--\xbe\xc0\xbf\xf1\xf3^\xcb\xc4\xd6\xc3?\xa74,\xd8U\x05\xe3\xbf\xa23\xb7})\xe9\xd6\xbfi\xe7|`\xf2Y\xea?T\x1d\x15\xf7}\x9e\xc6?\xd0\xfe4;y\t\xbc\xbf\x0c#\x1b\xd0\x1e\x9b\xb5\xbf\x80W\x1c\xc0\xf8\x9c\xc1?\xd0\x0e\x8d\xee3\xb2\xb5\xbf\xe4*\xadA\xa7`\xc8?\xe1\xadE\xd4\xf2\xeb\xea\xbf\x8b\xd9,\x80\x11\x8d\xe6\xbf~>\r\x12\xac\xc9\xc3\xbf!\xf3\xc6`\x1c\xd7\xd1\xbf\xa9\x0e\x16V\xa8\x85\xe5\xbfA6\x03`q*\xb4?\x9d\xd4\x99@d\xaa\xf1?>\xef\xc1\xa9\x11\xe5\xe8\xbf\x8b%\xfcS\x97\x13\xb3?\xb9a}\\\xb5Y\xe5\xbf\xc9\x80\x15B\xdd\xa7\xdd\xbff\x0e\xf2\xe9\xb8g\xd0\xbf"E\xf74 \x11\xd3\xbfg\x1b5X#\xb5\xe4\xbf\x92\xae\x06\x12\x11\xd1\x9e?\x18\n@\xc4\xd0\xa6\xd4?\xaa+\xd4\xa9z5\xf1?P\xf8\xe4\x93\xf0}\xd3?o\xdb2Ys)\xf0?l\x117j\x14\xd7\xd3\xbf\x0c+\x05Q\x9a+\xc2\xbf\xde\xe8G\xe0\xa3c\xba\xbf\xa0sp\x07\xc8\xf1\xdc\xbf\xd5B\xa3Y:\xa0\xc8?!\xca\xa0{\x06\xe5\xa3?\xee\xce\xb1\x1a\x93\x87\xe4\xbf\x8d\x81y\x1f\xe6n\xc5?j\x1d\xdfB#\x18\xd0?\x82v\xba\xab\x9a\r\xf4?\x9b\xe5U\xc1OB\xb6\xbf(\x0ctPe,\xd3\xbfR\xa8\x13*\x17\x06\xc9\xbf\xecu0st\x11\xda?\xcf\xc3\xf2\xe1\xd1o\xdc\xbfl|a\xb05\x97\x89\xbf\x9bi\xce\xe7g\xe1\xd0?NX\x87\x96/[\xe6\xbf\x87\xc7]wn\xcb\xc0?\x01G\xfe\xcbW\xef\xe2\xbf\x7f\xd9Y.\xb9}\xe5\xbf)\xe6.\\e\xd2\xcf?\x12x\x80\xd4\x8am\xdc\xbf\x07\xa87V\xa6\xda\xe6\xbfr\x90\xe1\x1f6\xf2\xef?\xcd\x94\xbb\x16b\r\xeb?\xf5\xcdV\xd2\xf3\x82\xe2\xbfI\xbf)\xa5\xe6\xfc\xe0\xbf\xff\x0fz\xfa\xfdd\xd3?\xc3\xd4^\xb6\x14\x08\xc1?\xd0\xd5\xfc&\xbb5\xca\xbfO-g\x0b\xf6\\\xe4\xbf\xd7\xa3\xd1;y\x88\xab\xbf k\x16\x90\xa7\xa6\xea?\xe0>\x0fa\xb5H\xe7?\xce\x00\xc6j">\xc5\xbfYk\x02}\xa9]\xbf?Z\xc7\x13\xe0@\xab\xd8\xbf-Y7\x9c\x8d\xfd\xc5?\xc8E$0\x86\xb6\xd7?{ o\xaa"\x0f\xb0\xbf\xfa\xd015\x0b9\xd2\xbf\x9b\xaeq\xc8\x8a\xd0\xc4\xbf\x94\xc5=\xa0\x8c\xb3\xcd\xbf\x9d\xec\xc6`\x94\xa5\xf2\xbf\x87\xcb\xfdC\xa9\x1c\xeb\xbfw\xda\xb9\x83\xd5\xb3\xe6?\x1e0\xf0\x95\xb3@\xa6?\xb3\xbc\x06\xc2\xed\xf6\xd3\xbfPT\xd5\x9f\xfa\x0c\xcd\xbf\x1a \xc2\xb5!\xcc\xc5?\xb8\xb3\x8b\xa2Qj\xe6\xbf\x0e\x7f\xca\xb4\x87\xc6\xe1\xbf\xf3V7\x19\xb2\xce\xd9?\xf7ZhLKT\xef?++\xea\xbb\xf3<\xb3\xbf\xd4\xd2Wr\xa44\xe0\xbf,\x1a\xe1c\x9cW\xa6?[&\x99\x9d@2\xc2?[\x19s\x14\x98\xb2\xbf?\t\xb9\xa4t\xbd\x93\xeb?\xb4&\x0f\x97\x86\x1e\xd4?-\x08\x1a\xac\xda\xe4\xd1\xbf4)\xd1Yy3\xf4?\x01\x7f\xbdmZ\x11\xb6?\xd0%\t\x02\x07m\x8d?\xda\xd7"\xfd\xe8\x14\xea?\xeb>\x9bM\xf1\xb3\xa5\xbf\x11\xb0(?\x16[\xd3\xbf]\x13\x0c?\xa5\xd8\x85?O\xdf\xd1\xbf\xe1\xcc\xe6\xbf\xde\x9d\x858\xba\x02\xc7?e\xca\x93!^\xab\xe6\xbf\x10\x99d\xe0\xd5\xd7\xde?\xc0\xd3t\xa8\x9b\x03\xbf?( \x04%\xa9\xd4\xe5?_7\x8d2\xbf\x1d\xe2\xbf\xa0\xe2\xb4zes\xd1\xbf\t\xcb^\xa6R\xe1\xe4?\xa5\x8e\xcf\xea\xbc\x14\xd8?\xa3\xb4$)4\x0e\xe0\xbf|\xf7FW\x7fW\xdd\xbf0\xadA\x10\xb4\xcf\xd5\xbf\xde\x89\x94\xdej\xbc\xc6\xbf#agi\'x\xf4?\xe8\xadYI\xad3\xcb\xbf\xf7\xe9P\xc9\x8c\x7f\xef\xbf\x8bp\xf41\x84l\xc3?\xe1\x10\x84]\xeb\x81\xd3\xbf\x93$\xca\xa2\xb5W\xe1?\x02\x80\xd6\xc2\xb8\xf8\xd6?"j\xfdv|G\xa0?\xbc\xd8\xe0^[\r\xec\xbfGm,^+\x1c\xc4\xbf5@\'\xf4\xfc\x11\xe2\xbf\x040\x81\xfb!\x04\xcc?\xf6\x9e"\x89\xf5\xf9\xe7\xbf\xf7\xb9]\r\xf0\x1d\xd2?\x14\xba\xa5i\\\xae\xd2?<\x8d\xd22O\xc2\xc3\xbf\x1d\x83\x8e\xfe\xa3\xcf\xf7?\xe7\xb0l\x04\r?\xc0?\xe2a\xa0*\x84\xf0\xe3\xbfR\xf2\xd1\x8dO%\xe8\xbf.6\x89\xbb6\xad\xe4?\xd2\xc3Fh\xd3\xb8|?\xac-\x1f\x8df\xfa\xbf?\x89\x84\x07\xe7\xb7\x14\xe2\xbf\\\x9c\x1e\xad\xd5\x99\xe4\xbf\x8f\xf9\xe2Wca\xe4?\xa5\xbb-#\x8f\x10\xe6\xbf\xe0\xafwLH\x93\xb4\xbf0\xef\x85-Kp\xe8?\xa7\xb7\x89\xe6\xa4\xe8\xe4\xbf\xc8\xb6\xf5\x16\t\x8a\xe4\xbfPI\xcf=Ke\x91?\x8eep\xc1\xd8\x0c\xe2\xbf2\xb1\x02if\xd5\xe1\xbf\xc0\xb8\xe7w\xe08\xdc?_\xc5\xb3\x97s\xed\xf7?\x82\xb8\xb2\x7fq{\xe1\xbfzX\x1e#h\x97\xdb?\xf3\x95\xfa\x84\x9c \xe0\xbf\xe0+\xe0z[\x99\xe3\xbfaN\x9e\xfc\x10,\xec\xbf\xc3\xb23\x1e\xd7\x96\xdf\xbf\t(\xb6\xced\x05\xe4\xbfU\x12\xff!v`\xe5\xbf\xe4\xce\xcc\xd1\xba\xdc\xd2?\x84O\x1e`%\xe1\xc5?\x00\xa2\x01\x94\xcei\xb2?x\xe8\xce\x19\'J\xa3?f\xb2\xbd\xe4\x91\x13\xd1\xbf\x85\x02\x8c\x11aE\xa6\xbf\x0e>\xc7\x13\xee\xad\xe5?\xf8\x81F\xfe\x87\r\xe6\xbf\x85\x9a\n\x11`>\xad\xbf\xa4\xfa3\xd4\xf8\xa7\xe7\xbfq\xd7\xf56\x95\xba\xd2\xbf8l\xce\xdb\x93\x0c\xd7?vo\xc9\xcd$\xa7\xb6\xbf>1\x9a^Y\xd1\xe9\xbfT\xf9U\xfb\xec$\xc2?Q\xa3\xb9\x8d\xb2r\xc1?y\x04\xdak5\xde\xe3\xbf<\xfe\x8fo5?\xd3\xbf\xc7?\xa6_C\xdb\xe1\xbf\xda\xb9\x00\xbbM\xa7\x9d\xbf\x85*\xab\xd5\xd3\x7f\xe5\xbff\xe6\xa0\xa0\x1a\x83\xe8\xbf\x08\x12\xd8\xb5\x81m\xdc?\xc0\n\x96\n\\>\xb5\xbf\x8d\xe2G\xdd\x02\x8a\xf4?\x1d0{%\x1b\x0b\xe4\xbf|"\xef\xd5k\x1d\xea\xbf8\x8e\x1b\xcf\xa8\xe6\xdc\xbf\xe4\xc0\'\xa1\x08\x1a\xe6\xbf`\x07\xd6\x0e%A\xad?fA\xd8\xec\x0b\xb1\x93\xbfS\xc1\xa6\x92\x10x\xe0\xbf\xcf\xfd\x97\xd3\x16\xb0\x8d\xbf\x902\xec\xd5D\x10\xf1\xbf\x1c\xe2\xcc\x8c\x14\x19\xb1\xbfr\xf0W1\x8bA\xd9?\x04.0\x03\xadp\xdd\xbf\x94\xc0>\xfe_s\xe3?\x0e\x03\xfaZ\x97\xcf\xd1?\xbd\x94\n\xdf\xbaL\xf1?\xb8\x8f\xb5\x8f^\xd8\xbb\xbf=\xd1\x81K\x8b2\xd5\xbf*\xae\x90Y\x06\n\xd3\xbf\\\xcc7~\n\x0c\xc3\xbf\xc1\xc9wL\x956\xd8?\x95\x02\x19\xf6+\xcc\xdb\xbf\x1a\xc9L9)\x1b\xdb?j\xd4\r\xf0\xae?\xbb?K\xe3\x1d\x86\x1c\x17\xcf?\xc2-\xacq\x1dA\xb0\xbf\xcb\xa2|\x97g\xfd\xdc\xbf\xc0\x19\xd4\xbe!\xbb\xa9\xbf/\x92\xf6\'\xd5\xcfd?\xe7#$\xd1\xbcH\xd4\xbf8y\xdf<k\xdd\xcc\xbfN\x19\x82O\xd4Y\xfc?\xcf\x1f\xf7\x8eo\x05\xbd\xbf\x82~\xcc\xb5\x13\xa6\xe4\xbf(\x13\xc3\xb3\xb0\x95\xf2\xbfF\xdb\xaeC5\xf1\xe1\xbf\xa9X\x1d\x11d\xd4\xc5?\xa4y\x96\x88l\xc7\xdf?\x08\x90\xa6\xac\xbf3\xd8\xbf\xe2\xf3\x82Y)\x0b\xdb\xbf\xbc\xbe\xea3}\x12\xf0\xbf\x88O\xd9\'\xbf\x8d\xba\xbf\xc1-5\xcd\xa4\xfd\xc4?\xb1\xdb\x83\xebR\x99\xe2?\x11^Z#]\xe2\xa7?7{[\x94S\x85\xcc\xbf[\x9e\x18x\x150\xea?\x1c\xe8\x18\x94\x0b}\xe1\xbf\x8c\x15\xe7VwQ\xe1\xbf\xdb\xa3\xaf\xe1\'\x19\xe9\xbf\xcb\xd0B\xa92U\xdb\xbf\xc2\x89\xb5\x9d\xe4D\xe5\xbf\x86\x0f\xdd\xfbbN\xca?\x7f\x14O\xd5O"\xde\xbf\xb8s\xb2\xa4\x0f|\xe1?4\xaaH\xd5\x9eo\xed\xbf\xf8\xb3pE\xd1\xf6\xd8\xbf<\xa1\xd2C\x05\x0c\xf2?\xd4f_\xceor\xce?M\xb6\x82\x9d]}\xf4?C\x19Z3\xb1\xa5\xd2\xbf:J\xac\x15\x94\xa5x?\xfb\x03\xf2\xf92o\xf0\xbf\xcb2\x0e\xf3\x82\x91\xc3\xbf\xc0\x99\xa0\x92b8\xe4\xbf3\xe5\xc0\x839\x8f\x9e\xbf\x84\xdf=rK\r\xe1\xbf=Y\x80\xac\x96\x07\xe5\xbf\x07\xf3t\xa7\xe9*\xd1?\xa4\x0fm4Q\x0b\xe3\xbf\xdd\xd7\xeb\xe06X\xd1?\xc7\xa8Z\x89\\\x9di?P\xa3\xe9\x83P-\x9c\xbf\xf5;\xf7C\x91\xca\xd4\xbfO\x8d\x1b0#\x9f\xdd\xbfL\xcf\xecx#\xc3\xb7\xbf\x81O\xa9\xc9\xbbt\xb7?D\xbd\xb6(hh\x8b?+`\xbd\x84\xf3`\xeb?\xc4\xbc\xc4g\xf6\xf9\xda?iU\xb2QQ\xbf\xd2\xbf\x0f\x08-\x8a\x07\xfc\xab?:H$z:\xdf\xdb?@\xa0C\xd2\x0e\xb2\xd5\xbf\x11\x95\xf7\x13\x0ep\x98\xbf\xf1g\x8f3f"\xe8\xbf\xf7\xcf\xae\xb9\xfc\x13\xa7?k\xe0\x8e\xeeL~\xd3?s\xf2_y\xd3\xa4\xdc?)$s\x06ya\xd3\xbf\x18Y\xe3\xf0\xca\x90\xee?\xe8"Zh)\xbc\xf6?\xd3\xdd\xa2O9\xde\xeb\xbf\x13\x8d\xab\xfd\xc7\x9c\xc3\xbfv@\xd9\xe7\xc0{\xe4\xbfW\xb4\x10r\xaf\xdf\xd6?#\xfe5\xaf\xf6\xba\xb3?\x12\x8e\xe2\tZr\xe1\xbf\x90,\xdc\t\x1be\xe1\xbf\x8dooP8\x06\xd9?\x93\xa8\x87\xa7\xdd\x8e\x9e\xbfM\xe1B\xd0\xff\xda\xf0?\xb0H\x9f\xe1#\xa5\xab?a\x8e\x04[/e\xf4?\x90\xc4\xadD0\xd0\xe6\xbf\xb4\xfft"\x9c\xff\xda?\xca\xdfG\xc5\xdc2\xc1?\xa5\'\x9e\xd1\x91\x0b\xb2\xbf\xb2\xc3\x0cP_3\xb4\xbf\xd4\xdf\x9fX\xec\xaa\xd4\xbf\xc6jQR\x98\x0b\xe8\xbfD\x94\xd17H\x96\xdd?\x0e\xe4l\x0b\x9a\xb7\xcd?Vg\x04\xaaV\xd6\xfa?\xcd-\x12y>\xd9\xe8\xbf\x84\xab\xb9R\xb9\xbd\xaa?\x02\xc8\x9f\xc6\x96]\xc5\xbfn\xf5>\xd4\x90\xd6\xfc?\xfd\x89g{\x14\x0f\xec\xbfW*\xae\xa2\xb1\x84\xd5\xbfq\x1e\x03\x1b\xa4_\xea?>\x89\xb7!\xd0\x0c\xe3\xbf\x1b\xdfF\xed\x13\xe7\xe7?\xe7\x86\xe4r\xa3\x8d\xe4\xbfI\x19\x10\xb5\x86+\xdf\xbf\x94>z)\xc5\xd3\xc5\xbfN\xf3t\r\xfa*\xa5\xbfBb\xd5\xcb\x9c\xf8\xe1\xbf\xdfW\x08X\xc9x\x8c\xbf6\xbcn\xac\x17\xef\xf4?N*\x10\x9f\xa8\x1c\xda?Ulj\t\xba\xc2\xeb?\xd8\x9a\xc57\xb8\x8e\xdf?\xe2\xa9@{PU\xdb?{6h#\xe5\xc1\xb8?\xc6\xb3[G\xdf\xb1\xe2\xbf-\xbc\xb2\xfd\x06`\xc3\xbfI\xbc\xa4\xd5\x96Q\xee?\x9f\xc2\x9dl\x84}\xdc?E4\xf2\xcb\xa6\xaa\xa1?\xdf^\x17\xd8z)\xe5?p\xd2?H\xedV\xd3?\xb1F\xae\t\xb0#\xb5?Ll+\xdc\xb9\xf0\xf9?Nx\xf3\x8d\xf5~\xde\xbf\xf8\xa5\xd6t\xad\x10\xb7?\x91\xea\xb9_\xb0\xa9\xd5?\xb7GG\xcc\xc4\x99\xde\xbf\xa8)\xcf\x02\xc5\x9a\xf3\xbf\x01\xd0\x9e\x80\xfa\xcf\xd7\xbf\x14\xb5\x88\xd30,\xe0\xbf#C\xae\xe28C\xca?\xc7\xae\x00\xc6\\\xde\xe0?P\xd9 !\x19\xe9\xd1?\xaai;\x90\xa6\xb4\xe0?v\xec\xb9\x87\rq\xb9?\n\x15i\x8a\x0bR\xc3\xbf\x10\xa1 U\x8b+\xcb?\'K^\xc2\x05\x96\xfc?8\xd6\x8f\x83\x1c\xc7\xca?\xb5\x08(\xc2\x9c\x95\xdf\xbfi\xc8\x17\xcf~\x05\xbc\xbfs\x16\xe1\xfcZ\xef\xbd\xbf\xb4\xf6ODb3\xd0?\xbb\xce\xaf\xdb\xde\xf3\xf8?7\x93&\xd3\xf8\xfc\xe2?_\'X\x07\x11x\xd0?\x90\xc2kk\xa63\xf3?\xa7Y\x86W\xac\xc7\xee?\xaf3\xb4&H\x0b\xbb\xbfL\xea\x05P\xb6xc\xbfM\xde\xbb\xf5\xbf\xa7\xe0\xbf\x03Bz\x8cW\xa0\xb2?\x96{:\xa6\xd7\x80\xd2\xbf\xc39\xb65<X\xea\xbf\xf7\xea\x18\xd4\xfe\xa2\xeb?\x05]\x94\xd6RO\xc5?\xdfAb9M\xb2\xf3?\xae\x18y\xb5i|\xd0\xbf8\xc7]\xa4\xc3\x8c\xef?\x84\x88m\x98_D\xd7\xbf\xf0>\xd4\xb6\x98\xf1\xb2?\xe66s\x843\x12\xd1?\'\x01\xeai\x05\xd9\xe0?\xa1\xf9\xf5\\\xa0G\xe3\xbf\xfa\xc36\xd6l&\xe3\xbfY\xe3\x07\x910\n\xc7\xbfL\x7f\xf8\x1bQ\xb8\x9b\xbf\xed_C[D\xf5\xfb?wA\x14q\xefd\xd5\xbf\xf3\x04\xc5\x98=\x81\xef\xbf)\xcePIil\xc4?\x8e\xa1\x17\xba8a\xd4?\xac\xa0zl\x9dg\xf4?N\xec\xe2mx}\xb4?\xad\xc6\x80\xd1\xbd\x04\xb1\xbfS\xc8\x01\xe7y\x8e\xe3\xbfe;\x17\xbd\xa4\r\x8a?9kVv|p\xd2?\xb2\xdcv\x03\x05\x85\xb6\xbf\x1a\xebH\x8d\x8cn\xd1\xbf\x9e\xd5V\xac\x12\xa7\xb2\xbf\x8d\x10\xd4\xdd\xd9c\xe2?n#XN\xcf\xd5\xc6?h\x8ba\xe72I\xde?\x88\x16k\x98b\xdf\xdc\xbf\x88\xda\xac$(\x14\xd7\xbf\xcd[\xc4]F\xb5\xe2\xbf\xe1\x06\x86E\x1c&\xd0?"\x0f \x07i"\xca?\xfa\xd3C9\xd3\x1c\xd2?\xab<J\x03O\x1c\xe1\xbf\xec\x0f\xc54\x9d\x1d\xdd\xbf}\xd6\xd6\xa3a%\xf3?<3\x7f\xb7\x10*\xe7\xbfu\xae\xea\xf1G\x1a\xc1?\xf2\xb2\xae\x88\x04\x1c\xe9?.\xefyJ\xcf\xe9\xe4\xbfW\xf3\xea\xaa\x95\xbb\xd5\xbf\'\x03\t\x1de\x95\xd0?T_\xa2\x1cRX\xda\xbf\xca\xc4\xf8\xd2:\xe0\xe6\xbf\xbaZs\xe6\xac\xd8\xce?9d/\x8a\x99P\xed?\x0f5\x88|2\x87\xe0\xbf\xcc\x82\xc0xoV\xe9?\xdf\xacnsw\xf7\xde?z\xbc\xd3-dz\xdb\xbfG\xdd\xbe\x8aFq\xe6\xbf\xe0\x97\xec\xb5\\\xce\xd9\xbf\xac7uM\xe5\x0e\xe5\xbfJ\x8buw\x8d\xaf\xd4\xbf\x18\xc4\xe9*\x04\xa4\xe3\xbf\xe1\xd8HR\x0eU\xc1?\xefE3\xac\x18\x1e\xbc?Xf\x1d<\xa0C\xbe?\x82\xab\xbc\xb1\x9d*\xd4?eD\xba\x86\xcd\x0b\xc0?\xb9\xc29\xb1p\x04\xd4?Y\xe3\xa2\xd3m\xef\xd1\xbf\x86R\xec\x1a\xbf\x0f\xaf?\x88\xd9\xad\x0b\x80L\xbb?\xe76\xb2\x06\xdfM\xe0?K3\x8b\x06\xa5\xd4\xe7?\xdc<\xea\xd9\xf5\x14\xe5\xbfk\xe0s\xb5\xf3\xd2\xe0\xbfsz\t\xcfg\xe9\xb7?\x94\x9aH\xd4x \xea?\xc5o\xe3p]\x9b\xe4?\xda`T\xd9\x04\xbc\xd7?\xc5\xe4\xa5\xe5J6\xb0?\x98RE\x8b\xb6\x86\xe2?\x00F\xfe\xbaG\x85\xe3\xbfM\xc1\x81\x06\xd4\xf6\xec\xbf\xec\x1c\x8a\xecnz\xdb?\xc7\x9f\x04\xc0\xba\xf7\xe2?\x01\x0c\xc1wzl\xc2?y\xff\xaf\x150y\xd9\xbf\x99\xbdsUG\x9f\xea\xbf\xbd*\x08F\xa2\xd8\xeb?d\xf0GQ-{\xd0?Z\x8a\x87\x8d\xc0\xdb\xda\xbf<\xaex\xcf%O\xb1\xbf\xb9\xb3\x93\xbf\xd2\x93\xd3?\x99\x07\x8d\n\x9e\xc0\xd9\xbf\x8d\xff\x0f7\xbfP\xe8\xbf\x03Y\x80\x83q\x85\xd8?p\x0b\xd9\xbc\x88a\xec?\x16)Ip\x87~\xd3\xbf\xca\x9fOA\\\xc9\xbe?OzZ\xa0A\x17\xd4\xbf\x19q\xe5Xr\x9a\xe3?\x95K\x149\xca\n\xd4?c3\x0b\x8b\xaf/\xd8?a\xa2\x12\x05i\xf8\xb4?\xde}z\x14\xa6\xc3\xc9\xbf\x06TUt\x88%\xe2\xbf\x89\xc7\xd9%8\xe9\xb7?\x15\xc0w\xe3\xa9+\xcb?A\x95*\xd7r\t\xab?\x12\xd2t\x15\x1de\xde?\xf1\x16\x9fN\xdf{\xdd?\xa9\xecf\x90\x97\xc3\xd4\xbf\x97R7\xd4\xe1\x85\xa9?\xda\xc35*=4\xdd?2\xcf+\x13\x16|\xe6?6\x83\xcf`\x16~\xf5?\xdc\x82`\xba\x1b\x8a\xe2?f\tp\x9f))\x86?\xef\xd0\x08y\xa7\x05\xe4\xbf\xc74\xc0\t\xaf\xaf\xec\xbf \xb4@Zf\xc3\xd4?*}\x08\x95\xeaW\xe1\xbf\xa6}\xc8\x0f\xda\r\xc1?\xf1\x82\x05\xa8\xf7\x81\xce?\x9f\xe2e&\x9ak\xd9?\x1d\x02?\x02\xa8\xb3\xf3\xbf\x05\x8d\x93p\xaf\xb7\xaa\xbfY\x9e\xc3\xe0s\xfb\xb2\xbfc:8W:\xb9\xb1?\xf5/\xe4\xb5\xfb?\xde?\x8dS"M\xd5\x8d\xbd\xbf4\xc3\x95\xf0;f\xda?\xaf\xa0\xf6\xb8\x0e\x14\xea?\n\x0e\xb4\xf0!<\xb3\xbf\xbcq\x9d\n\xc1m\xe3\xbf\x94qJ\xb3\xa69\xe5\xbf\xef\xa3[\x08\x8c\x84\xe4\xbf\x96\x04\xec\x88\x1d\xaa\xcd?+\xf1\xdb\xd6\xb8f\xd3\xbf\xeb9}+C\xe3\xf6?\xc3\xa8\xd1\xf4c\xc0\xe9\xbf\xf0\x87\x8a\x86\xa8\xe6\xba?\xb0\xaf\xdfu\xd0\x83\xc4?\xaf\x96WU\xb4\x9a\xd6?\x8f\xe2\xc5\x0b\xfb\xa6\xf3?\x88\x92"\xe3\xec;\xe4\xbf\xc8\x01\x9a\xb0\xe8-\xd0\xbflD=\xb3}\x95\xee\xbf%!\x0e\xe93\x85\xe9\xbf=n\xd1\xa3D2\xe9\xbf?X\xd7\x1c\xee\xff\xc5\xbf\xaa\xbb[>I\x1e\xe8\xbf\xeaZ\xbf\xfc\x90&\xdc\xbf(\x13u\xd8\xd4\x1c\xd2\xbf\xc7\x12\x1f\xc7ED\xe3\xbf \xd4\xe9\xfd\x9f\x8b\xe5?\xcfy\xb1\xa5h\x13\xd5\xbfr\xd1\xcc\x99U5\xea?`\x15hp\x8b\xae\xd3\xbf\xd8 "\xc3\x8f\xa2\xd9\xbf!8\xfa9k\xce\xc0\xbf:\xe2_\xda\xd7\xa7\xed?\x94\xcc\x99\xf6\r\xf0\xd4\xbf\xdft\x00\xe2z\xc8\xf0?-\xf4Vqo\xf5\x9e?M\xa8\xe97f\x9c\xd8\xbf\xb8\x80\xb3d\x1d\xee\xbb?\x18\xcd=\x11g\x0c\xe3\xbf\x85\x84\xe7\x81\xb9\x1e\xd6\xbf\x1d\x13\x16\x9a\xe1\x94\x88\xbf"\x90_{\xd5V\xc7\xbf\x1e\xd4\xb4\xf9\xff\xb3\xc5?e\xd1?\xc4)\x9f\xa5\xbfj@e\xe9\xd2-\xdf?L\xed\x99\xad\xc5\x7f\xeb?p+\xa6s\x00\xcd\xef?&\xa6\x8d\x1f^\xd2\xd5?\xd5\xc9C\x9b1X\xe3\xbf\r\xdb\xea\xc1\xc9\x1b\xe4\xbf\xde\xf0\x84[!\x8f\xe7\xbfb\x19\x8f\xcb)B\xe6?8k4\xd8\x1f\xb3\xcc?,\xc2\xf7m>\x0b\xe1\xbf\xc2\r|\x96L\x87\xe8\xbf\x081\x9d\x9e\x96\x84\xb1?\xc5\xb3\x1a\xd4yT\xea\xbf\xeb\x9a\xf1:\xa73\xe0?\x19s\xb3(f\xc5\xd7\xbf\x83 \xc8\xef\xe5\xe1\xdd?\x12\xfbs1.\x89\xe5\xbfY|\xe4\xc0\x07\x8a\xcc?\x8d5\x08\x8d\x88\xec\xc7?c\x05\x15\xf8-2\xc2?;d\xe3c/I\x8b\xbf\xee\xe38\x96q\xa9\xcb\xbf\x0c,\x81\xb3\xa1\x05\xe7\xbf\xfd\xec\x81\xa7oI\xba?\x90\x8c\xb5\xc2\xd0V\xd6\xbf"\x7f\xc8\x17\n\x0b\xd6?\x97\xa2\t\xfb\xefT\xea\xbf\r\xea\xccP\xc1>\xe0\xbf5\x1e\xd3\x15\x99\xa1\xd5\xbf\xbeotp\t\x17\xb6?(,\xc0\xc6\xb9S\xbf\xbf\x99\x89\xb8m\x16/\xe1\xbf\x0b\xe3,IWe\xd8?,\xfdP\xbe\x9e\x8c\xa1\xbf\xba\x80sf\xeai\xda?\\\xd8\x9b)7x\xe4\xbf\x16\x98\xa4\xda\x06B\xc2\xbf\x91\x0b\xff\x01\xb6\xc5\xdb\xbf\x1b\xd6\x98\xe3?5\xa7?VC?\x8f\xa2(\xc6\xbf\x9e8\xba\xc1\xf5P\xe1\xbf\x1by\xaf\x98\x88w\xe2?\tVN\xa3\xf4I\xf0?\x9c\xd5\xb6n5\x08\xf3?\x02"\xd7\xc3)x\xa3\xbf\x8d\x8b\x82\\&7\xd6?y\xf8\xe0C\x967\xc8?\x9c5/kdg\xd7\xbf\xaa\xfec\xea\xa7\x1a\xc3\xbfk\xdeGyh\xfa\xc7?\xf2,\xc4t\x0b\xf4\xdf\xbfpO\x11\xec\xc4O\xcb\xbf2A\x8b\x8a\x164\xd6?\x14\x8d\xaal\x9a\x05\xe4?\xbc\xe8\xdao\xa9\x86\xa9\xbfFD\xdd\x88\x94)\xf6?\xfc\x91\x81S\xd0\xf5\xed\xbf*6\x01\xfb\xac\x0b\xd2?^\x80\x97r\xaa\x8c\x81?\x85\x9bFKC\xf5\xad\xbf\xa3\xa4\xa3\xd3$\x0e\xd9\xbfE:K1q\x82\xce?\x1e\x80\xa1L\xf4\x18\xe6\xbf\xc2\xc05Px]\xd3\xbf\xe7>R\xa5\x06\x8c\xe5?_\xeb\xa8*\xa4\xda{\xbf\x19\xd5\xbd\x1a\x9f\xef\xd5?K\xa4\x0c\x04\x0c\xed\xf6?$\x9e\xe8\x1d\x81\xa2\xf8?\xc5\xe4\x072d\x95\xd3\xbf+\xa5\xd3F\xb2J\xea?\x9bX#\xec\x94\xc9\xc5?\xe0\xfd\x80\xb3\xc2\xf0\x88?\xbb\x08w3\xe7\xb2\xca?\xb0\x0bq31\xc8\xac?\x81\x7f\x8d\xba\xffE\xd4\xbfU\xd6\xa0\x08\x8e\xf3\xf1?\xc0\x82\xda\xe3\xf3\xfc\xc4?\x18\t\xd7\x95\x13\x8f\xcf\xbf(\x19KD\xdf-\xaa\xbf\xd0s\x934(\xb9\xd3\xbfHt\x00\xfb\xff,\xd8?y\x1b\x8e&%\xec\xea\xbfLF\x99\xbb}\xdc\xe1\xbf_\x9a\x86\x19\xc6I\xb3?\xce\x03\x03\xb4\xe4\xd5\xd6\xbf\x07e1\xafF\xc2\xe9\xbf\xd2+@r\xa2k\xa8?h\xea\x14!\x9dI\xea?\xdaSU\xb8)\x94\xf0?\x1b\xdcle\nv\xef\xbf3\x01\xc7\x1c\x86\xaa\xc5\xbf\x01U|`\xd2M\xf6?0\xae\xb8\x1e\xd2(\xbf?\xf0i;c\x07o\xe7\xbf\x1c&\x9a\xc8\r[\x8b\xbf\xa7Q)\x8c\xcdw\xe3\xbfK \x86\xd8\xd4\xb1\xe1\xbf\xc51\x8a\xdbu#\xc4\xbfR%\x82?\xc8\x02\xa2\xbf\xd3\x8cI&\x085\xc2?@\xb2\xc5\xa12\x07\xdb\xbf\xbf\xf81a\x04\xf6\xe9\xbf\xa3\x88\x89:X\xd2\xd4\xbf{\xb0\x86\xd4<\x84\xbc?/K7\x112\xad\xf0?\xed^\xaespr\xa6\xbfG\xbeX\xc4\xa8\x98\xd3\xbf\x89\x95\x9d\xf0\xe3n\xdb\xbfA\x05#\xaa\xd8w\x8f?\xa4\xa5ot\x06\xc1\xd3?\xe3\xc3\x83L\x0c\xed\xe2\xbf\x91X\xab\xaf\x8e\xa5\xd7?!M\x8fzSc\xe6\xbf&g\x86\xb4\x8d\xd1\xae\xbf\xdb\x18)(\xf2\x07\xd0\xbf\xa4\xb4\xe3y\x0cu\xde\xbf.\x9d2U\xd9`\xe4\xbf\xd5\xeb\x87\xe4\xfb\xce\xe6?V5"\xfd\x00%\xe4?\t?u\x10\t\xcb\xe8\xbf-\xf4\x85\x85\xd9\x19\xe7\xbf\x9aEe\x17\xd9Q\x99\xbf\xae\xd5,Dr\xfb\xd0?7I\x0f\xecy\x85\xe3?\xc2:\xa5\xad\x15M\xea?\xd7\xd4\xa3\xa9\x03e\xe6\xbf^\xe9\xa8M\xa4\x90u\xbf\x9eQ\x85\xac \xfd\xdc\xbf\xe9k\x9fD6\x15\xd1\xbfv\xb7\x9c~|\xf9\xba\xbf\xb8\xa4\xfe\x9e\xffk\xda?ww\x1cd\xa1k\xe7\xbfb\x96\xf5\xce\x85\x85\xe3\xbf\x12\xd3\xc9Xc\xf3\xda\xbf,@\x99Anb\xdb\xbf\x10\xba\xdduT\xd2\xc8\xbfy\xcf\xcenxS\xd4?\xb3l\xf6\xe7\xa5\x9c\xf4?\x0e\x06\xc0\xc9^\x9d\xe2\xbf\x02AP\x12\xe9#\xd0\xbf\x98\xf6+,\x94\xf3\xe0\xbfo\xb1,"\xc8\xcb\xe4\xbf\x17\xa8\xf8\xd4\xa8%\xcd\xbf\xda;\x0c\xcc\x87\x0b\xee\xbf\xd1\xc9\x88\xd8\xf3\xf3\xdc\xbf72\x14\x07\xf42\x9d?"_\x82\xffHP\xad?\xa7C\xb9\xa5\x87\xde\xaa?gH\xea\xe8\xab\xc1\xc5?\x19\xebP\xca\xe9{\xa2?\xec\x19\x80\xd9\xf4x\xc8\xbf\xc2a "B\xbf\xbc?4\xf3K\xcf\xae\xb7\xf6?\xa1a\xe7\x08\x19#\xae?G\xab\xccJ\x7f.\x97?\xf1\xed\xe8v2\x10\xe5\xbf\x13\x01\xb5\xc5\xaf\xcb\xd4\xbf\xd1\xfb\x14\x83\xb0\xaf\xd6\xbf\xbd\xdf\xfb\xd9_\x92\xdf?\x15\xe1\xa9\xdbbr\xed?\xc9\xa1\xd2UK*\xdb?\xf8\x96d\x1c\x13\x8a\xc7?\xd5Jg\xc0\x1c\xab\xe0?K\xff\x12w\xac|\xd9\xbfR\xd30\xc5]L\xeb\xbf\xa2\x01L\x1e\x9a\x1b\xe0?^\x06(\x0e\x0e\xc0\xc6?\xc6-\x16"a\xd5\xd8\xbfA=\x9a\xee\x981\xe3\xbf\xdc\xbay\xda\x0f\xc9\xe9\xbft\x01IL\xce\xac\xf2?X\xbb\xd1\xf7\x19c\xf4?q\xf4\xb7\xd8|\xc2\xea\xbf\xea\xcb\xcc\xadX\x0e\xe0?\xf6\x06\x8dU4\xcf\xfb?\xa3s\xf1\xd50\xab\xd0\xbf\xd9\xf1\x1c\xbe?>\xd1\xbfkk\x1b\xcf\xd7\xc0\xc2\xbfP\xb0@q\x12\xd7\xe3?l\xc4\x1c\x95x\x84\xdb?\xd8\x08c*\x94B\xe2\xbf\xd50z\xcb\xb6\xeb\xe8\xbf<\xf6N\x1e7\xb6\xe0\xbf\xbe\x1f\xe5\x96=\xaa\xbf?\xa5\xb2\xec\t\x97D\xc8?cFl\xe0\x0c\x84\xb1?\xd8&\x8f\x17\xf9F\xdd?g\x1c\x1f\x1c#\xfa\xe6\xbf\xd1;\xbb\xa5\xfc;\xd0\xbfI]\xfc"\xce4\xe4\xbf\x1e\x82\xcd\xcf\xfb\xd7\xbb\xbf\x12\x17\xa6\x05\xd0A\xd3\xbf\xd3M\x16d\xf7\xc1\xa9\xbf\xa5\x0f\x89\xfd#&\xc9?>e9<\xa6_\xb8\xbf\xf1\xfe\xf5\x1f\x93k\xb9?w\xb8\xd0/x\x07\xef?\xd0\xa8iN\x10\xc5\xfa?\x11\xac\x91EXh\xde\xbf\\\xee\tEO\x1b\xbc\xbf\xfd\x83\xb6\x91nQ\xd7\xbf %\x85\xe4\x06v\xb2\xbf\x89\x1d\xac\xec\xb2(\xd6?\x0f\x0c\xf7\x1c\xd3n\xe6\xbfRiv\x9d;\xff\xe0?j\xb1\x16O\xa3\'\xe0?Sh\xa0\x7f\x16R\xe2?P\x06p+;d\xea\xbfv\xad\xd8f\xe9\xfd\xde\xbf~")\x1a\xc2\xcb\xda\xbf\x82.m{\xe3\xd8\xe5\xbfY\xb1*\x03\xc2\x1d\xa6?\xec_\x9c\xe0\xe45\xeb\xbf\xa0Q!*%\xfd\xe5\xbf\xaac\xc1\xa7\x90\x88\xea?4i\xc7\xfc\xf8R\xd1?\xd3\x00\xa4.\xba\xe4\xd6\xbf\xf6\x8atR\xf3l\xd7\xbf)\x87\xdb1b7\xe4\xbf*]\xd9\xf9\x91s\xdd?"\x85\xa0\xd9\xa2\x90\xc7\xbf\xe7\xcb\x82e\xfc?\xf4?P\x1f\xad\x91\xe5\xad\xe6\xbf\xafA\xaf\x9b\x04\x94\xca?'
p45
tp46
bag2
(g3
(I0
tp47
g5
tp48
Rp49
(I1
(I9
I256
tp50
g12
I00
S'|eC\xf0\x0e\xa6\xde\xbf1\xf4\xe7$\xf8\x1a\x00@\\~* \xcd\\\xd5?\xed\x7fn\xd3\x05R\xd7\xbf\xaf\x9d#\xc3\xb0\xcf\x85\xbf-\x05\x8e,\xba\x90\xed\xbf\xe9b\xc9\xa7\x01\xc9\xe6?\x86\xb5\x80\x86\x8b*\xcc\xbf4\x86C\xe6\xf4\x01\xd2\xbf\x95\xc4o\x08 G\xd8\xbf1D\xb9\xf7\xd8f\xe3\xbf\xb1\xf4\x16\r\xae\xf4\xe1\xbfd\x86\xf0?]\xc9\xe4?\xd7z\x134\x9a\xa8\xea\xbf\xd6+\xe4\xf9\xa3\x0e\xb2?Y\xb9\x15\xb3\xe1\x82\xd7\xbf\xaaP\xa4\xe2\xa4~\xe9?\x12\x19\xd3\x01\xe3!\xe0\xbf\xab\x04\xe0\x18\x0c!\xfc?\xe4\xa0\x94t\xfc\xbd\xd7\xbfJA_\xf9j\x9c\xbb?\x08`K\xcd\xb6\x0c\xe8?v\x9c+\x110\xc2\xe1\xbf\xb0\xe0Lk>\xf0\x8f?\x91\xa8\x8a\xf2\xe5i\xe5\xbf\xa7\x84\x81\xc4\x9f\xd6\xe2\xbf\x0b\xa21F\xa9`\xeb\xbf\xb9\xaf\xc4\x11D1\xe0\xbf\x92\x98\x19\x90\x0c\xa5\xc8\xbfT\xacZ\xae\x12{\x9e?e[{Hb\xd3{\xbf\xa9\xda7\xcb\x91\xd9\xe0\xbf\xcf\x10w \xbdO\xd8\xbfU\x9a.\x889e\xd2?L\xa3i\x17\xdbx\xda?\x97o\x8b\xfb\xde\xcc\xcf\xbf\xde\xa1\xb7\xf1\x06\xf2\xde\xbf>\x04\xba\x05\xf9\x9d\xb0\xbfF\xf3\xd7\xef4\xa1\xe2\xbf\xd6\xa3\xa8\xb2\xfa\x8c\xda\xbf&i\x9e+\xc7\xbd\xc1\xbfZ\x83\xe6sB6\xf3\xbff\xf9\xf1\xe4v\xfb\xed\xbf\xdb\xdbQ\x88<(\xd1?\xd38nK\xbd.\xa2\xbf@L~7\xb3\xc7\x9c?\xce\x88\x8b[\x01*\xe2\xbf\x8f\x9a\xa1F\x95\xef\xde\xbf\x86\x93\xcb\xa5\\\r\xd1?\xfc\x07y5\xaf\xb1\xd5?\nw\x89@\xfd\xbc\xef\xbfx\xb7\xded\xe4\xba\xd3\xbf\xf8\x08\x8d\xb4k\xab\xd8?\xa8\x01\x19Z\x0f3\xe3\xbfo\xfd\x11\xa0\xd7\xa5\xda\xbf!\x00e\x171\xc2\x9b?\x13K\x02\x94\xde\x8a\xe2\xbf `\xfd\xcf[\x84\xc7?\x0f\x89F\xf7E\xa0\xc9\xbf\xb0\xbd?{lC\xd0?\xd6[~\x0e\x7fK\xe4\xbf\xaa\x12\xe3EW\xb2\x01@\xfc<J\xb7E\xc2\xdd?U\xb2\x89\xfb[\xd9\xdf?6_\\\xe2\x16\xf0\xe3\xbf`0|\t\xe0\x8a\xe0\xbf\x9c\xfb\x8fDt\xc8\xe2\xbf\xf3R\xe0;\xcb\x81\xdb\xbf\xcf-\xbe\xad\xd1n\xef\xbf\x9e\xb7\xce\xd6\xafK\xe3\xbf\xaa|w\x1b\xc7N\xcb\xbf\x98\xdf/\xfd\x94V\x9a?\x01*q\xe4V\x10\xd7\xbf\xd0\n]\xf63\xf7\xe6\xbf@+\xa3\xfe\xca \xe7\xbfx\xd3\xbe\xffw\x13\xb5?\x08\x97V\xcf*\x8a\xe0\xbfi\x81\x8a\xd1T\x13\xc6\xbf\xb8!\x87g\xd7\x84\xf3?\x9b\x16\xe49F\xde\xa5\xbfw\x8cY\x0c\xad\xa5\xd5\xbfa\xe1o\xe6\x1e\x89\xe3\xbf\x937\xc1\x879L\xd6\xbf?\xf6\xce;\xd0\n\xec\xbf\xbd\x00\xfat\x07\xee\xf4?M\x8e\xc5x\xd2\xec\xe0\xbf\xa1\x9d\xcb)@\x03\xd6?A\xd9\xc1L\xcf\x84\xe0\xbf\xa3\xcd\x8dQ\x1a\xa5\xf0\xbf\x16miO\xbe\xa1\x9a?B\x1eQ\xb6\xfe\xdf\xdf\xbf\x17\x1b\xe3\xf4\x0cM\xd6\xbf(V\xd2\xa6\xef\xba\xcc\xbf\x91\x04T\xec_\xdc\xce\xbf\x1d\xa0v\xe8\x83\xf6\xdc\xbf\xa3[>4Q\x9br\xbfc\x90\x84K\xc7\n\xc8\xbf\x0f\x12X\x16[\xc7\xd9\xbf\xdek\xc6\x9e\xd2\x8d\xf3\xbf3:Ds\x86u\xb7?\xaeb\xbcx[\xa5\xf5?O 9\x9e\xa9M\xea\xbf\x18OC\xd9\xa9\x8e\xf8?\xc3\xa6o\x9a\x9d\x82\xac? \xdf\xdd\xad\x03F\xea\xbf"\x8f\x13\xdc\xdf\xd3\xbf?\x87]|J\xa3\x87\xd1\xbf\xb0\x9b[\xbc\xf0\xcc\xda\xbfX\x0c\xac\x85\x18\x8a\xdd?\xf9\x07$\x85\x8b\xe9\xdf\xbf\xd6\xd0\xf6\xfc\xf2\x08\xeb?$I:e\x05g\xe3\xbf\x87\xb9\x1dz\xbc\xf3\xa9\xbf~\xa34\xf4\x1c\x05\xe4\xbf\xb0\xe03kvS\xc9\xbf\x10g\x0b\x89N\xf0\xe2\xbf\xb8H\xa9\xa4C\x0f\xd1\xbfCT\xba}/\xfe\xdb\xbfK\x8f\xcc\x9e\x99qq?\x86\xa7\x95\xacYN\xc7?7\x11\xae\x94!\x0c\xe4\xbf\x8f\xe4\xca=1,\xe6?\xf9-Qs\x9f@\xd5\xbf?\r\xbb\xda\x98\xe3\xcc\xbfidf\x80kj\xba\xbf\x82&m\x9c\x95\xcb\xda\xbf\\\xab\xb7\xda\x82\xe8\xdb\xbf\xa0\xbc\xad\x8c\xdfm\xa7?JM\x1as\x00\x99\xec\xbfRo[\xf8WX\xe1\xbfS\xaf\\=3d\xe0\xbf\xcf!\xba\xaf\xfb\xc4\xf1?\xb8\xd2r\x14\x8b#\xd7\xbfU\xc1\xf7\x97\xcd\xa4\xb0\xbf\n\xbd\x1c\xd3\xd2q\xa0\xbfd\xc1CZk\x0f\xd6?N\x96\x8bG\xa4;\xe1\xbf\xbb;\x03s\xc8W\xe8\xbfwQ\x7f\xcb\x9f\xf5\xe2\xbf-\xa4c\xe9\xc1\x94\xb2\xbf\x04~\xd9\xd9.\x97\xb5\xbfNp{t\xa1U\xe0\xbf\xa5\x00\x89~\xf7\x8a\xd8\xbf4\xc0\x85A\x0eL\xd1?\x07$\n\x87\xabs\xd4\xbf\x99C\xdf\x9d\tq\xe3\xbfT\xd0?_\xc1N\xe9\xbf\xffe\xa9\x00\xcbP\xcf?\xe0\xe9\\\xfd\xf7\x8c\xe1\xbf\xea\xc6I\xda\x96}\xe5\xbf`\xeb\xb5\x1a\xbc\xc7\xcd?\xf54\xd8\xe8\x84!\xd1\xbf\xbeT\xc0\x14\xf8\xbe\xe1\xbf\xa6\x8b\xc5?\xa1\x9e\xdf\xbf\xb8\xf1\x00\x17\xa0\xac\xd2\xbf\x86pY\xe4\x95\xcc\xe3?\xdd\xb0"\x97#w\xea\xbf\xf7b\xec\xc0\xf3\xce\xeb\xbf\xa6\x19v65\x16\xc5\xbf\xc6(\xfa\xa9\xf9\xd7\xcd\xbf6\xc3\xd3gf!\xd2\xbf\x1cN\x19\x8d\xb8\x1b\xd7\xbf\rwm\xa3\x90\xd0\xd8?\xaed\x0c\\G\xa3\xd0\xbfA{-\x96\xfe\x85\xec?fw)4M\xc9\xe3\xbfd\xc5=\x9c\xa7C\xec\xbf\x18\xf6J\xfa#\x1c\xe7\xbf\xe9%I\xb9V\x81\xd7?\xed\xda\xfd\xcf\xf9\x92\xe2\xbfEC\xae\xd3\xdc\xa5\xe3\xbf\x04\xc69\xf4\x1c\xd4\xe3\xbf\r\xfb\xfe\x8d\xb65\xca\xbf\xa9\xa8\xfc\\\x1c\x9a\xd5\xbf\xa8\x89v\xa8\xb3\xbc\xe7?\x00+I%7\xf2\xd7\xbf\xc3\x0b)\xec:\xaf\xdd\xbf\xd3\x81-\x92\x01\xeb\xe0\xbf\xa6}\xad\x89\x8c\xdc\x92?\x9f\xa0\xdd5\x82\x0e\xd6\xbf\x19\xf6#z\xb5\x04\xe5\xbf\n\x04\xcb\x9aH\xae\xf1?(R\x14\xb8Z\xfb\xdb\xbf\x96?\xb8\xf9f\xbb\xb7\xbfg\xb8\xf0C\x9a^\xde?Y\xf8\xa6\x9a\x92\x1e\xd6?B\xc3\x95\x8d\xf5F\xf0\xbf\x01*tl\xa3z\xdf\xbf\x95\xbf\x05\xd6\xe4\xfa\xe9\xbfCr\xcedIp\xcf\xbf53\xea;\x19\x92\xdb\xbf\xd4\xa2\x83lr\xa9\xe7\xbf\xb5\x15G\xfe\xbb;\xe7?U\x7f\x83\xe7\x8a\xf8\xdc\xbf\x03\xa9\x1eX\xcc`\xe3\xbf\xba\xe3\x95N\x0bU\xc8\xbf\xe3\xbda\xa9\x12\x1b\xd2\xbf\x06\x9aZ\xb3\x82A\xdd\xbf\xea8\x90\x08\xea?\xc8\xbf\xc3C\xa3\xaeH\x99\xcc\xbfk\x9a;;\xa8!\xee?\xb9\xc6M\x0ej\xe7\xe6\xbf\x11U&A\xbe\xcf\xd7?\x97\x96[5<j\xdc?\xf5\xc8\xc1\x81_o\xec\xbf\xd7\x1c\x9c~\x93B\xd6\xbf\xd4\x7f&\xca2\xc5\xc3\xbf+D\xee\xdf\xcb\xa9\xec\xbf\xe88\xf9\xfd\xb0X\xe2?aHt\x02\x0b\x15\xd5\xbf\x9bvC\x99\xd7\x18\xa5\xbf\xb2E\xc43\r\xb4\xae\xbfR\x141\x853\x11\xf4?2\x9a\x9b\x03\x92I\xdd\xbf}\xcf\xa5\x13\xc0\xb2\xd8\xbfxb\xb1N\x1a\xa7\xf0\xbf\xb4U\xbd<\xbf\x0c\xe4\xbfO\xcbZR\x1c\x9b\xe0\xbf$\xb8\xa5\xf0\xec\x0e\xdd\xbf\xa17\xe9\x10\x8d\xbe\x97\xbf\xf0\xe0lH\xcd5\xe1?\xe3\x1d\x02\xdb@T\xc8\xbf\xf9\xcd\xe1\x04\xd5\xac\xdb\xbf@\x11\x8e\xa3\xf9{\xe5\xbf\xd3Ex\x9b\xec\x1e\xe2\xbf\x1b)\xcf\x9e\xcc;\xe0\xbf\x1b\x16c7\xbe\x9f\xe5\xbfOfP\xf2\xc5:\xf4?\xb40u\xf2\x07\x86\xa1?\x98\xa9\xec\xb7\\\xb6\xc0?\xa0\xd0.\x81P\x11\xde\xbf\xfeY\x9e\xceo\xc1\xe1?\xaa\x01|\x9cgs\xd7\xbf\xf0\x05\x84*\xda\x9b\xce\xbf{\xf1\xa8\xc0,\xaa\xed?$bn;\x9d\x0f\xe8?\\\xd0\xa7\r\x8a\xf5\xe1\xbf:\xc6\x0f\xce8\x90\xff?\x1c7\xc9i\x92:\xe3\xbfj\xf8b\x1a\x9e\xdf\xde\xbf]\x9eWD\xc3\xff\xb8\xbf\xec=\x05G\xb1\xd6\xc0\xbf&\xc1\xd1)\xa3)\xeb?\x80\xb1\xa5\x18\x03~\xbb\xbf\xc6~\xd8c\xad\xa6\xce\xbf\xf47\x11\xa1vm\xdf\xbf)\xfb\x83\xb1>\x1a\xcd?hf`\xbcSS\xe8\xbfy\x07h\x8a\xae\xcf\xde?Z\xd5\xf8y\xf2z\xe4\xbf6\xa6G\xbc\xd7v\xf1\xbfW\xbd\xd3\xcd\xd2C\xdd\xbf3\xd3\x8av|q\xc5\xbf\xa5\xd2\x19\x91w\x89\xf2?\xa2\x16z\xc4\x1eW\x00@*\x86ya\x8d\x9a\xd6\xbfq\x0e9\x84\xd3\xf6p?\x1f@rE\x9f\xef\xee?\xee\xc6o.\xf8V\xd4?\xfc\x8f\'\xc8h\'\xca\xbf~\xbe\x1f\xber{\xa2\xbf\xac~4\x11W{\xed\xbf3\xd4?h>\t\xc2?\xbb\xd7\x80W\xb12\xc3?\xd8\x8e\x0bd\x16\x1b\xbb\xbf7\xdc\xa8!\x81\x17\xcc?\xb2C\xb2\x8c\xe2\xf2\xb5\xbf\x18\xd7&\xdd\xce\x8b\xe1\xbf\x89.pO\xd3\xc7~\xbfU\xda*\xb8\x1a(\xd0\xbfa\xd9T=\x7f\xee\xd6?8\xc7\xb6\xb5\x02G\xc3?\x1c\x0eg\x91\xc9\xfc\xf2?\xf50\xa1\xb7v\x97\xd0\xbf\xbc\x16\xb9\xd2\x81\x1b\xf0?+\x8d\x07\xf1\x88\xe9\xcb?\x8e\xcf\x07I/\x16\x8b?\x81`\x88\xc2\\\x87\xd4?0H$\xd5+i\xd1\xbfCC+\x11\x05\xaf\xbb?A\xf4\x11\xbf\xd5a\xe2\xbfA\xb7\xdf\xcf]\xaa\xe1\xbfn\xe8p\x0c\x856\xe7\xbf\'\xc31!\xbf,\xec?\xf6;TOv\xf4\xf9?\xbc\x8c)\xe3Wo\xb9?\xa8\xe7\x9ct\xb9\xe2\xf4?\x01\x83\xd4\xd9\x81D\xb0\xbf\x01\xd1\xb2\xd0!C\xec\xbf\ri\x12\xbf\xb8\xbc\xb4?G\xc0\x97\xab\x88\xdd\xe1?\xed<\\\x01?&\xd3\xbf\xd8Ma69\xd8\xbf?\x07\xb5\xed"a\xb0\xad?\xe7\xf1\xdd\x9f\xd9\x90\xa7?L2\xc4\xf4\xd2|\xd4\xbf<\n3\x15\x94\x98\xc5\xbf\xeb\x10\xbd\x114\x82\xd8\xbf\xc3$O\xf9\x0b\xc9\xe8\xbf\x12\xbd\x10\x02@$\xb8?\xe33\x9b\xc2\x03\xc8\xcb\xbf6\x92\xa8\x98b\x8c\xd7?\xda\xae\xa3P/\xcf\xe1\xbfOP\x8a\xfa\xd6\xe3\xc0?\xd7\xce\xd0\xe7\xbe\xb5\xc4\xbf\x15\xd8\x0e]OH\xdf?P\xf7Aj m\xe9\xbf\xa7j\x01P\xfc\xc3\xa6?\x81\xde\xb7\xd4{\x97\xcb?`\x02I\xfa\x1e\x03\xe0?6\xc6\xd6\x08[\xd6\xd9?;\xff\xb0\xbc\xda\xf0\xba\xbf\\!-?P\xaa\xc6\xbf\x03\xfd\xc5t\x8d\x10\xa3?\x87n%jK\xf5\xd5?\xb7F\xb5g\x81\x97\xcb?\x81g\x1a\xd3~f\xe3\xbf\x98\xe7\xf5pI\x9d\xe3?\xe5\xc1\x0c5\x14U\xe5?\x9bf\x9e\xdb\x15\xaf\xf4?\x9b\xd2E\r\xa0F\xe3\xbf\xedfGj\x15\xc9\xd7\xbf\xacLbh\x0e\xb6\xe3\xbf\x1dO>"\x08\xfb\xc3\xbf=\xf3\x9a\x01\xd4\x06\xe3\xbf\xb7\xa53\xb6ll\xd1\xbf\x1d\x07\xda\x07\xff\x1c\xd6\xbf\xefg\xfa}\xaa`\xd3\xbf\xdf\xe5\x13\xe4\xf4\xa1\xe5\xbf\xcb\x93\x18\xa5m\x08\xbb?V\x82\x84x\x06\xf7\xe8?\xda\xed\x8e*\xe6\xe3\xb3?\x07w\xe4\x18?j\xda\xbf\xdd\xb3\x98\xdc\xb0`\xcd?\xf8\x06b_~\x1e\xf2?\x95\x01\x82,\xbf\xa6\xe2\xbf58r\xc1\xbf\xcf\xee?\xa8\xcf:\xb1m\xab\xdb\xbf\x1ca\xb0\'\xa3\xd9\xd7\xbfO\x85\xe7\nqq\xd0?\xf9b\xe7\xbc\xe0\xc6\xdb?\xb6W\xebK\xf7\xe3\xdc\xbf\xe4N\x9c\x93g\xc5\xe6?\n\x7f>\xee\xfcG\xc9?\x88{\x8c\x06\x0b\xe4\xe7\xbf\x8d\xbal\x05\xee\xde\xb6?\x81j\x18\xde\x0c\xae\xc3?\x7f;\xf5\x85v|\xe7\xbfw>\xff\xa6\xce\x05\xec?\xd8\x94\xd6\x03\xf1b\xdf\xbf\xd2\x9f\x9d\xb1\xf0}\xa9?\xc2\xd7!l"\x9b\xdb?\x8cU\xce\xa1\xca \xcc\xbf\x96\xf5\xe0\x17>\xba\x00@9t\xaa\x0f\x94\x10\xd7\xbf\x99\x06\\\x95\xc5\xbe\xd5?\xf8\xfe\xd7z\x961\xee?\xcb\x12yk\x86}\xbd\xbf\xdb\r7\x982\x12\xbf\xbf_\xceB\x1f\xb7)\xd9\xbf\x10O|\xbb\x95\xb6\xdb\xbf\xb3+\x19\xe8\xd4J\xbb?\xe0\r\xfb\x85\x04>\xd9?8h\x0f\xea\\\x85\xd0\xbf\x04\xc2\x7f\xe1\xfc\xc0\xfa?\xbaO\xa4\x8f-\xba\xe6\xbf\x18t\xb6X\xf5\xa0\x00@\x146A\x9d\x07\xd2\xe3\xbfEAQ\xee\xcb\xb4\xb0?[\x9f \xe7^\x17\xe4\xbf\x12{\n\xees[\xdb?7\x8c\xeb\xd9\x99L\xa1\xbf\'2\x99b*\x1e\xe0\xbf\xa8!\xe8\x94\xd8\t\xff?i\xbdx[\x88\xd6\xed?j\xf9iM\x91\x85\xcf\xbf$Z~\xa2\x06,\xc7\xbf\x95\x8a\xb4\x93\xf9w\xec?\xed\x0c\xc4\xc7#\xcc\xc5?\x8e8\xcb)\x84\x83\xb6\xbf\xdb\xd7\x0c\xf6\xe1\x82\xc2?X\x8d\xf1"\x8f\x03\xcc?\xb3\xb6\x98h\xa8F\xe0\xbf\x01\xf0\x97\xccd1\xd2?\xc2\xf9\xc2\xdf\x07\xd4\xe9\xbf\x1d\x12\x9d\xf3\xe3\x03\xa8?Eq\xae\xc3Q\x85\xe1\xbf\x94\xff\xa9h\xa9J\xbf?EP\xd1\x8f\x92\xce\xd7\xbf+\x04\x146\xfe\xe5\xe4?\xce>f\x9d1{\xf1?\xd8\xff~\xb6\x88,\xd7?c\xd7\xda\xd9\x87\xed\xe4\xbfH\xc0BK\xee\xf0\xe2\xbf\xf46\xa5\x02\x85\xf7\xe2\xbf\x7f\x84\xcd\x0ck\xd1t\xbf\xe9\xad\xc2\xe9\x95[\xc8?\x1d\xad\x97\xb8\xb6\x1d\xe0\xbf\x1c\xb5\x91\xf2\xf2L\xb2?\xb4\xa6#\x9e\xf7\x9b\xf7?#\x8e%\xee\xea\xa8\xe3?^\x17Q\xcf\xa3\xee\xda?\t\xe3(x\xf4\xb3\xe5\xbf\x10\r\xfd\x08\xf8m\xf2?)\x9e%Q\x05\xa8\xcb\xbf"rK\tc\'\xcb\xbf\xdcp\x98\xaf\xfd\xdd\xd6?\x90\xc7\xaag\xc4\xc4\xd5\xbf\x13\x8f\xd5\x98Zf\xe1\xbfU\x1c\xd0.\xed\xf1\xef?\x8b\t\x10Y\xfbL\xe4\xbfIPM\xd2\xd6-\xdd?\xe8n\xf0s\x8f\xb1\xdb\xbf \xcdu\x90Sf\xe9\xbf\x94-\xbfPp\xdf\xce\xbfIg\xffgD"\xbf?\xcb\x01\xbc\x13\xb3\xc4\xd7\xbf\xc0\x19\x93\x86O\x1b\xd3\xbf\xd1^\x12i\x87\x00\xd5\xbfh\x1f\'-\x1d\xf9\xb1\xbf\x9b\xb6\x11\xeb\x07S\xf3?,\xdf>\xd0\x96\xc6\xdf?\xf6W\x83\xdd\xb3;\xb9\xbf\xe5\xd6\x96\r\xfc\xe2\xcc\xbf\xf8\x9c\xf1<\xb5\xa6\xcf\xbf\xbc\xe7\n\xe1\xa3X\xe1\xbf\x80\x15Q&=N\xe1\xbf\x80\x00\xadtr\xf2\xdb?\xb0\xabC\x7f\xfa\x0f\xd7?_t\xe2h\x8c\xc6\xd4\xbf\xc7\xe4sd,\x90\xee?\xdfVSiIu\xe7\xbf\x97b+7\xbe\xd1\xc5\xbf}\x0f\x9b \x16\x87\xe0\xbf.8M\xa67N\xd5\xbf\xdc\xc9\x06~\xff\x98\x86\xbf\x00Rs\xce\x9e\xba\xe3\xbf\xd2Z\xcd}\xb3\xea\xf7?:%\xed]\xd5\xd1\xd6\xbf\x9f\xb9\x05\x99\xa0\x1d\xdf?\x8b\xf3\x98\xb7"#\xd7?>\x94\xe7!\xfdX\xf6??o\xcf%W\xfc\xd8\xbf\x96\xddV\xc1\x97\xbd\xe1\xbf\xe6\x84&2CV\xb2\xbfv\x8fr\xac\xb9\x7f\xab?\x15v\x92\x83\x1bH\xb5\xbf)\xce\xbf\xde\xed\xe4\xe5?\x8c\x98\xbe\xd1\x9ad\xd7?G\xfect\x8e\xb2\xcf\xbfu\xfe\xf5\xb1\xb8-\x9f\xbf\xc6^\xa8Os\x8e\x9a?\xab\x06&\x85\xa0\xb2\xff?u9\xe9~\xb1\xf9\xcc\xbf\xe0PDjw\x89\xfb?I90\r\xd2\x88\xa0?q\x054\xa2p^\x9c\xbf2\xed\xa9Z\xff\x8c\xe7\xbf[D\xbf=I\x8f\xeb?q\x1e\x83\x0cY\x05\xfc?\xfb\xef\xf5.\xed~\xb1?\xe1\xd97\x86\t~\xe3?J\x0e\x0e\xdag\x1d\xb3?;\x99\xf1\xe2jq\xdc\xbf\x1c,3\xcb*\xa6\xe7?\xe6b\xfe\x83.\xb4\xe6\xbf\x1do\xf3\x97\xf8\xc5\xd2?\xc3\x8d\xbe\x199\x06\xac\xbf\xcae\xc4\xd4\x00\x9a\xe1?\xad\xe6\x15\xb9g?\xb5\xbfY\xda\x97\xee\x93\n\xb0?-\x17\x81U!\xed\xe1?#\x15)\x87\x9a\x8b\xdb\xbf+\xe0B\xefM\xa7\xbb\xbfh\xaaQ\xb8n\xa5\xcf?\x1e\xdf~\xa3\xf6Tf?[`\x16m\x1c@\xcb?\x9f\xa0\xe3\xa5m\xb1\xca?i\xe3e85\xe0\xc1?\x9a\xec\x16\x81\\j\xe1\xbf\xbd7\x9c\xc8\xb6\x04\xc9\xbf\x94V\xedf?\xad\xb8?C*\x0fID\xf9\xeb\xbf.\xef\xd0T\xe0\xc3\xf9?b\x9d2j\x9b\xfd\xc5\xbf\x7f\x82\xff/\x9d\x02\xec?\x80%\xd5`\x89\xe3\xe0\xbf\x19\xc9-\xd2\x1c\xb3\xcd?\xfa>5w\xb1\xf4\xe0\xbf\x89Hl\xbaN\x94\xa5\xbf4x\x13Bor\xea?Z\x06|\x12<o\xda?\xe0\x0e\xb6\x9b\xdfK\xe2\xbf\x00\x9a\x90\xaf\x15\x80\xc5?\xf7\x93wM\xf7\xfa\xd0?y/A\xcd\xb0\xdb\x02@\x98\xcd^\xecR\xb5\xc9?\x86\x88\x1a\xfc\x9d\xe4\xc6\xbf6\xed\'\xa1\xb8O\xc8\xbf\xe5\x17\x00\x92-\x8f\xa2?i\xc7V\xfc\xae\xce\xe3?\x7f\xc7`\xcc\xc4\xae\xe5\xbf\xc0\x7f\x12r\x13\x94\xc3?f+\xa1O\x90\xe6\xe7\xbf\xfa\xc92O\x89\xf0\xf2?\xf2\r\x9f\xac\xa0\r\xcf\xbf\xb62\xcd6b\x1f\xee\xbf,\x02\xdef\xb4s\xe6\xbf\'\x98\xfc\xda\xc5\'\xdb\xbf\x8eT\xf4\xb4\x15Z\xee?\x9d>\xb55"\xc4\xaf\xbf\xecj\xb01-\x10\xcd\xbf\xe8\xdb\x1c\xd1\xfe \xe7?\xa2\xb5\xc0\x8b\x90\x85\xd9\xbfW\xd3XC\xaf\x9c\xde\xbf\x1d\xbb\x8c\x1d\xbf\x19\xb2\xbf\xd9\xa5_&i\xa0\x9a\xbf\xaaju\x19`\xd6\xc0\xbf\xe1\x17\xf9\xe4\xac\xb3\xcd?\x8d~\xd4[X\x1e\xcb?\x1ah\xfd\xaf\xda-\xc5\xbfQ\xaaM5W\xf5\xc6?\xbfV\xdc\xfeH\'\xdb?W{+$\xd1o\xe1\xbfF\x1cf\xc0\xde\xc8\xd9\xbf\xf9\xc1\x15\xe9\xdbJ\xdc?Z+\xfb\xb5I\x08\xe0?\xbc\x9c#U\x8b\x8a\xf0?\x855\x04\xae\x8c-\xc7?\xe2\xf8\xa4\x9b\x06\x98\xb6\xbf\xe1\xab\xf3\xbeI@\xe0\xbfY\xa2\xfeP\xb6\x12\xc0?\xef_\xb4\xb9\xa3\xa1\xdc?vH\xcc\xcd\xdf\x0b\xd8\xbfM\x11\x82\xc0\xc6\x16\xd5\xbf9_N\x0e\xf2\x85\xb4?G[\x86[xz\xe1\xbf\xb0\x1b\xce\xe1\x11\xe2\xd0\xbfJ]\xa06\xcdh\xd3\xbfg_\x19Ls[\xf4?\xbd\x85hr\xfc\xde\xf5?>3\xee\x8c\xef\xef\xb8?\xca\x07\x1fm\xbd\xa3\xf4?\x0b\xd7:\xe3\x9a\x8f\xe3?\xdfm;x\x1f\xc2\xd0\xbfs\xdd\xdf\x00\x93p\xe2\xbf\xcc\xd3\x81\xf7-C\xcc?N+\x7f`\xbd\x14\xde\xbf9>\xc3\x1d\xc6\xfb\xc2?()Rq\xa9\x14\xc4\xbf\xb9\xf2\xb6\x1cg\x04\xf8?b%6\xc8[\t\xe0?\xf9\xb5\xc1\x99SE\xda\xbfX\xa5c=\xfd\xa6\xd5?\xef{#g\nj\xde\xbf\x18\xfb\xd6\x8a\rA\x9b? \x9a\xafX@\x05\xe2\xbf\x84\xc9\x8fq\xf6D\xbd?[\x90c\x0cO\xf1\xe2\xbf\x07_g\x04\x02\xf3\x9a?\x13\xa2\x83\xdc\xeb\x97\xe1\xbf\xbe\xc6\x1cT8\x8b\xd6?%td\xae\x90\xef\xc3\xbf\xa5\xe5e\xd3\x0f\xbe\xd9\xbf\xf8\x9fmS \x9f\xb6\xbf(j\x9c=K0\xf9?O\xfctJ\xce\xd8\xd7?\xaa?\x04u7,\xce\xbfM\xab\x0c\x10sq\xe4?\x86T\xd5I\xfb\xba\xe4\xbf\xd2\xb0\xeet\xac8\xc7?==H\x01\xbc\xbb\xe3\xbf\x04+C.mi\xd9\xbf\x03V\xdcPw\x15\xe0\xbfNm\x19(\xa9\xa2\xbd?p\x9e\xe7\xf9;\xda\xdf?\xf9X\xdb\x0e0\x15\xd8\xbf\xb3Z\n\x96\xf9\xa8\xb8?\x1b?^\xc4\xc4-\xe4\xbf\x97-s\xb4\x11\xfa\xb8?(\x87/X\x8a\x9d\xbc\xbf\x8cZh\xad\xe6a\xbd?\xc0H\x8f\x11\x91\x0c\xc9?\xd0A\x97O\xc8A\xe1\xbf\xb4\xf3\xfb\xe9\xe6\xc0\xda\xbfb\xf5\x93\xb6\x9f!\xe8?\xfdR?/j\xb7\xf7?\xc5\xdf$T2\xbf\xda?*\xfa\xf9h\xec\xa4\xdd\xbf\x9e\x1f3\xa9\xceN\x96?|\xaa\x88/\xb0\x81\xb6\xbfs|b\x848\xa5\xe2\xbf\x19\xe7\xe8\xbc\xfc\xd8\xf7?\x7f \x8d>}g\xd9\xbf\x96{\x93\xe0\xce\x1b\xdd\xbf\x16\x07\xc0\xd1\xe4\xbd\xda?\r6\x99\x1b~\xb1\xd6\xbf\xd1U"\xa5C\xef\xe2\xbf(\x17\x06q6\x8c\x89\xbfCt\x10\x18\t<\xdc?\x90\xa22\xe5\x84\xd6\xcd\xbf\xab_\xae\xd0\x03P\xdf?aT\x85!v\x99\xd2\xbf\xd1\x81\x8b\xa8\xa7\xcb\xe6\xbf\xa9f\x8bO\xcd\x99\xf2?\x00\xdb\xb5\xff\x0e`\xdf\xbf.\x0fy\xd3\xe6\x15\xcc?V*\x9b\xb6\xd6<\xc4\xbf\x9eh\xd7{\xef\x17\xc2?\x9e\x8b\x02\xd8,\x87\xf2?\x1ec\xbe\x12G\xb6\x88\xbf\xde!\x07\xfc\x93t\xd8\xbf\nA\x0f\n\x00Z\xd5\xbf\xfd1\x08!\xeb\xc1\xf4?\xad\x15\x17\x93\x81\xfc\xda\xbf\x18.\xbfYbr\xda\xbf\xdbH\xbf\xec\xab_\xd7\xbf\xc97\xfe r\xa0\xe2?&f\xbe3\x19\xef\xc0?I\xb1\x8e\x974\x1f\xc0\xbf \x1e-\x87\xe9_\xe1?\x8c\xf1]\x91I\xe9\xe4\xbf.\xb4\xec\xf8\xb8N\xc1?\x80h}~\xc7e\xc6\xbf\xe9\x96\x7f(\xb4\x7f\xbf\xbf]\'@tj\x07\xe4\xbf\xbf\xbc\x8b\x8a@0\xd8?\x1c \x83HM\x8b\x00@#\xa8/1L\n\xe9\xbf\x9bG\x8a\xb5\xaf\x8b\xf4?\x1f!\xd7FFb\xf0?;\xcf6O\xe9\xfa\xda\xbf\x94\xda\xbeq^\xd0\xc2?>\xf3\xc8s\xe3\xb3\xc3?\xd1\x81\xb6\xfd\xe70\xdb?\x1b\xbe\x99\x86\x13W\xe9?<\\t\xbb\x92x\xb7?gd@\x06\xed.\xf0?\xb2\xe5\xde_\xbb\xd0\xe2\xbfV\xa7@^\xedi\xc5\xbf\x92\xbba\x07\x12\x95\xd8\xbf[\xd82\xd1\xd3\xfb^\xbf\x803\x9d\xe4 &\xd3?\xa8\xa6D\x8a\xc0\x9b\x90\xbf\x86{\x8f\x1cTl\xd0\xbf\xa7\xa66\xa5S \xdb?%\x8f\xe7\x9cp>\xf9?\xf1\xee \xfe\x16\x10\xd5\xbf\xb8\x91wE\xce\xb9\xe3\xbf\n\x14k\xb9\xec7\xe2\xbf\x1a/+w\xccL\xe3\xbf\xc0\x8f\xe6\x8d\xa6\x8a\xa6?\niFS{{\xd1\xbf\xb7\x8c\x86\xcbH\x1e\xd2\xbfu\x05\xd3M\x1c\xbf\xd0?\xc5\xb5\xe9\xf1\xc7/\xe2?\xa7\xf5W\xe4\xf0\xaf\xe5?\x96\xf8\xee\xed\x8c\x15\xf8?&3\xba\xa8\'\xc1\xdb\xbf\xcf\xeb\x84^Y\xc0\xc2?(\xff\r6\xc4g\xa6\xbf\n)\x8e\xdb=+\xcf\xbf\x01\\\x16\xcb\xc4y\xc6\xbf\xb1\xa4C\xb1*\xc6\xb2?\xcf\x89q\x01V\xf6\xd6\xbf\xa5\xaa\x14\xben\x08\xfd?|\x97u=+e\xe3\xbf\xf8`\xb6\xdb\x0b\x8a\xbe\xbf\x9bB\x1f\xcd\n{\x89?\xde8\xf5\xda\xfc1\xcf\xbf{\x95L[\xf4\xa2\xd2\xbf\xdcG\xa3_G\x1a\xcc?\x8b)I!\x92z\xd6\xbf\x0c\xea$S/;\xe0\xbf\x8b\xfa\x065\x9f|\xe9\xbf\x1d\x96\x9f\x1fu\x87\xc5?\x89\x9a\xe3\x98\x18\xb7\xe4?\xeb\xd2E\x1cm\xf8\xde?6\x1fPZ\x9e\xac\xea?\x01\xa2\xc8\xef5\xb8\x9f\xbf\xcd<[S\xb8H\xe4\xbf\x8f\x0cG\xa9\x9a\xca\xe1\xbf\x90\xdb\x16\xd1E\xe9\xd0\xbf\xe1Dn\xd1(\xef\xf9?\x02\x9cO6\xd3\xb4\xda?\x80{(\xeb\x94\x0b\xb8\xbfK\x88\xf7E\x93\xe9\xb2?Ivg\x0ea\xaa\xe7\xbf\n%\xb5G\xaaR\xa9?\xef\xb8\xf5,\x8d\x05\xe1\xbfOrD\xaf\xa84\xb3\xbfI\xac\x92,"\xca\xd6\xbf\x12\xfd\x00\xee\x94<\xe3\xbf8\xbaPth\x80\xce?a^\xf0\x13R\x04\xc4\xbf\xd4\xe2\xfc R \xd2?\xb6\x9d4\xa5&.\x83?\xc1\xdcM!):\xe6\xbf]F=u\x850\xe9?\xdf\xd8"\xb4,v\xe5\xbf\xab>\xac\xa8m\xe3\xcc\xbf\x97N\xecGl\n\xc3?%\xa8\xa0\x02\xac\xe1\xd2\xbf\xe6\xd61x\x17\x9a\xf0?!\x05\x03\xcf\xc7R\xc0?\xa4w\x1c\x8bJ#\xd4\xbf\x87Y\x95C\xe1\xe1\xec?\xb1\xde>;\x1d\xe6\xc7?*VE\xdd\x14N\xf2?<\xe4\xa6I\x0f_\xdd\xbf%\x04\xb1\x1c\xf3\xb9\xf4?\xae\xf1\x1c\xe9\xa5\xb6\xc3?\xbd\xd2\xe9\x91+x\xcc\xbfE(\xc6\x12Je\xd4\xbf\x80\x9f\x9f\x11;g\xb9?m\xb7\xe1\x13\r\xeb\xe4?\xbc\xa8\x15\xb4)\xf1\xb6?Or\xb6>\x0e>\xe6?\xbc$b\xc3\xe2x\xae?\xdcj\xd9A\x8b|\xa2?\xa5\xafB\x02v\xb6\xab?\x99:\xba\xee?\x9c\xe3\xbf0\x9d\xce_\xa9\xce\xd7\xbf1\xf8\xb8J\xa1\x9e\xae?rS\x1a\xec\x04[\xe3\xbfD\xedn\xe1{\xc6\xbb?y\x9f\x8f\x8bO*\xc4?s\xba\x15\xc0l<\xf8?\xf2\xb0\x0f\x85\xa7\xec\xe4?\xdbvhd\xc2 \xcb?]\x93\x01\xa5\x93\xfc\xd4?\xddw\xc6.\xea\xe8\xdb\xbfv\x96\xcf.[Z\xc6\xbf\xb7\xbe:\x11U7\xe2\xbf\xe1B\xf0b\x9b\xb2\xb7\xbf"\xc6\xe9\xa1\x0b\xc6\xdf\xbf\'\xe3\xdd.\x0b\xe9\xce\xbf\xad\x83-\xf8\x83~\xef?8 8\xdb.H\xe5\xbfv\x01\xdd0E\xa0\xa0?ptFE\xeb\x8d\xa0\xbfW\xef\xee\xc9"t\xce?\xd3\x85\xc8Ql\x1b\xdf\xbfp4\xb5\xc7m\x90\xe1\xbf\x853\xa223-\xe1\xbf\xe1\xaf\xf0\xb0\x97\x17\x88?\xf9Z\xc5\x1e\xc5\x0cv\xbf\xd6\xa2\xcab\xa0O\xc7\xbf^H o\xc4c\xe2\xbf\x82T\xdavh\x87\xdf\xbf\xc7\x9d\x9d\x1d\xe9\xd1\xd5?\x8c\xe4\xd3\x0cc \xec?\xacUv9\x8d\xc9b\xbf ;\xf8..1\xcc\xbf\xd1I \x9e\x9cT\xe5\xbf\xc7\xb0^\x80?\x9f\xbc\xbf\xe6&[l\xc3\xbd\xe0?\xc3_` \xea`\xe7\xbf@s\x81\xd2\x95v\xb8\xbf\x03NH\xf7\xf5^\xe1\xbfw\x12\xdak\x13\xa9\xb3\xbf\x9aOr\x9b L\xe8?\x10\xc8h`n\xe1\xd2\xbf\xbd%\xe2B\x8b\x8b\xe4\xbfF ?\xe9|@\xe0\xbf@\xc69\xa0\xda-\xc8\xbfk\xb5h\xb1H\xa7\xe5\xbf\xa4\x13h\xd5\xb31\xd2?\xb3m\xcbt\x98v\xe6?tz\xe1\xcb\xee\x84\xdf\xbf\x1c\xa6\xad\x0e\xa2\x00\xe7\xbfT\xad\xd0%>Y\xc9?\xbd5vz\xf7\xc6\xc1\xbf\x93B\x05qm\x05\xf0?\x1b\x1a\xea:I\xa4\xd0\xbf\xc2\xbe\x03M\x16t\xb7\xbf\xc7K\x7f<\xd8]\xa0\xbf\x80\xde\xdb\x153\x05\xca?O\xca\xe3W\xf1S\xec?6\xc1\x03F)\xe2\xa0?\xb9m\x89\t\x97x\x90?\xb8\xc34\xa7\xb7>\xf0?\x8f\x0e\x8f\x11\xa8L\xd5?j_5\xd2\x8e?\xf5?\xfe\x88 gsu\xef\xbfG\xea\xbb\x10oi\x92?\xd7JX\x13\x94\x9f\xe0\xbf\xd3\xcf \x98\xf2\xc0\xe8?\x9d,s\'\xae\x84\xd7?\x1eN\x9f\xd99q\xe0\xbfmaX\x7f\xb7f\xdb\xbf\x03Bys\xeat\xce?I"n\xda\xad\x00\xb1?F|TW\x94\xc5\xdb\xbf\xa8\xde\x1c\x08R\xdd\x9c?@\x95&~\x11I\xf2?\x01\x02%:c\x1a\xd7?-\n\xf5\xf3K\x99\xbf?\xd9\x07\xf2q\xc8P\xe5?\xbfGP\x95c\x88\xf0?\xda\xa3cp\xde\xf3\xd4?\x06D\xb1u\xbf\xd4\xe1\xbfnD\x0bD\x1e\x0c\xdb\xbf\xf6\x81CI\xca\x0f\xd1\xbf\x98\x13\xde1\xc0\xfb\xe1?\xee`,:\x89\xab\xb6\xbfH\x81\xc2\xff\x0c(\xfa?\xba\xd6_.\xd9r\x00@\xeaH\x04;\x9eX\xc3?\t8W \xaeI\xe3?\x02\xde\xe1\xf1n\xc2\xc4?Y\x9d\xbe\x0e\xbb\x19\xd1\xbf\xae\x14\xe78{p\xcb\xbf\xed\x1d\x15\\p\x1e\xe7\xbf\n\xf0O\x93\xec\xd0\xe3\xbf,\x95aA`\xff\xcb?*\xe5M)P\xc0\xe5\xbf8h\xdd?n\x07\xd1?\x9b|\xcb\xc2F\xbc\xd3?c\xd0\xf9\xdax\x8d\xc5\xbf)<\xe1\x13\xf6\x17\xd3\xbf\r*x\x84\r\x9a\xf5?\xf0\xbd\xc2\xaaf\x80\xd2?\xe2\xfc\x11\xad\x99\x83\xd3\xbf\xdc\x88\xd2w%b\x01@\x9b\xac:\xb2\xea\xf1\xeb\xbf\xed\x7fx\xae\xce\x00\xcb\xbf\xe7\x19\xa1*W\xe5\xea\xbf\x893\xb5\\\xd2\xab\xef?\xe5. \nv\xe9\xe1\xbf\xef0$\xe8\x919\xd1\xbfV\xf4\xec\x98\xaa\xff\xd1\xbf\xfb\xc2(\xcc\xdap\xe1?\xe6X\x1ch-\x97\xbf?/\x80\xf3\x93\xf0A\xe4\xbfm\x9b\xcf(\xcb%\xcc\xbf\x9f\xfanie\x03\xeb?\x88\xd3\xfc\x88\x97\x88\xd8?\xdf\xf9\xb1cy\xac\xe2?3\xc3j\xe9\xfeG\xe1\xbf\x07\x99h\x15_\xe5\xa8?\x1fW\x99\x85\xb6\xdb\xea?\x94f\xb1\x9cO\xd5\xf0?_, \xc6\x04\x17\xd2?\xf3;\xaaS`\xdb\xc7\xbf\x1c\xd7\x9d\x96\x128\xaf\xbf\x1e\x08\x14\x9cq\x00\xe6\xbf5s\xf4<y\xa5\xe2\xbf\xbe\xc3F\x0e\x8e\x0e\xf1?h\x05\n\xa1\x8e|\xb9\xbf\x98?:K\x9av\xd6\xbf&\x93<\xd0R9\xe0?DFv\xa9z\xb5\xe1\xbf\xff\xc8\x8cY\xe1\xbf\xd1\xbf\x17\xe5\xcd\xa8\x0e\xc6\xd7\xbf\xf5s\'\x8fa\x14\xf0?\x87c(>\x81S\xe2?Z\xaf\xbeN\xe7v\xb3\xbfQ\x1b\xcc\xd8\xc4S\xdf?\xea\x8b\xae\x95\x9f\x1f\xd5\xbf\xd8l\xf0{\xeb\xc8\xe5?\xb5\xc2\xe6\x8cS7\xde\xbf\\U"\x84\x9dZ\xdf?\x13\xbf\x16W\xa2\x11\xc2\xbf\x1e\xb8\xcc\x96\xbc1\xd4?T+\xfd\xe5\xa6\xbd\xd4\xbf\xea]\xa77\xfc\xea\xdb?\xb9\x91\xc5\xae\xb0%\xd7\xbf\xdbc\x0c\x19\xd4?\xe6\xbf\x9f3_\xc40C\xfb?\nZ\x10-\xb2\x12\xc9\xbf\xc4>\x9bb\x0e\x0b\xe3?\x97\xd4\xb1~\xb4K\xbb? T/\xa1+\xa4\xd6\xbf\x1dSS\x02\xec\xe7\xaa?F\xeb\x96\xc1\x06x\xa0\xbfT~\xbdKV\xbd\xdf\xbf/\x92\xca7K\x93\xe2\xbf\xff$\x7f\xc2\xfb\xfe\xd9\xbf\x02\x1d\x8a\xf1*\xd2\xdd?\x1dn\x9cJ~x\xde\xbf\xc1\xb3\'\x8bh\xe3\xe3\xbf\xd7\x01G\x1c^n\xd9?\xa5\xaaL\xd4g<\xf1?c\x81Bu\x07\x9fr?\x17\xdbT1\x05*\xa9\xbf\xd09\xb6\xae\xb5\xfb\xbc?0\xca\xbb\x80=\x9b\xdf\xbf\xc9\x96\xb6\xd8\xcd\xde\xd9?\xc3\x86!\xd2\xaf\xb0\xe6\xbf.3\t\xa1\xc0\xf4\xc6?\xa2\xa9\xb4\x1bT\x99\xf0?\x99\xe4\xe7\x91\xf9\x8d\xbe\xbf\x15]:\xe9\x13\xb3\xf0?Q\x8a\x12`\x9dq\xe3\xbfd\x04\xb9\xe8.\x19\xd7\xbf9\n\x17\x8b\xf6\xf5\xe5?\xc6\xa5\x1b\xddX\xe0\xdb?\xaa\x98?\xaa\x07@\xfd?\x89p~[sD\xd5\xbf\xf65\x1e\x9a\xba6\xd4?_\x11\x1b\xf0\xef\x99\xc1\xbf\xba 9\xa0\x1d\x9c\xde?\x18\xdd\xd5\xeb\x85\xd9\xe5\xbf\xc6\x1f\x05H\xa5\x04\xe4\xbf\x1a\xf0i42\x84\xe9\xbf\x10\xae\x8d\xf5\xef\x03\xe3\xbf\xc0]\xa9\x18\xbed\xd0?`\xc82\xde\xa2T\x94?\x97i\x13\xa6\x05Y\xfc?5\xf9\xdc\xc4\xd6\x05\xb0?k\xe9\x1fcS\xca\xb5\xbf\x7f\xd3\xdb\xfe\x1a\xab\xc8?R\x92H\x16M\xc2\xf8?C\x12\xc41\x12\x1c\xe9?jq\x08\xe9{\xddg?a4\xd9\x15Q\xf1\xd0\xbf\xdb\xce\xd4\x1c\x07\xf1\xdb\xbf{\xca\xf2\xe2i\xe8\xe1\xbf\x02\xb8\xb8\xf1\xd4f\xe0?\x91\x93\xd4k\xba\xca\xfa?\x85f\x01\xb5\xac\x97\xe8?\x9ex\xcb\xf1\xa2Z\xe2\xbf-\xbdp;\xcf\xba\xd9\xbf\x19\xe10a\xea\x11\xe7?\x92z\xb2\xddWA\xe9?\xabu\x86zL\xc5\xd7?&7\x01\xaa\xe5\x86\xcd?\xec\xa2 #\xa9R\xd1\xbfSZ\x10c:=\xd4\xbf\xdc\x1eh\x7f.L\xed\xbfY\xf5\xc5\xe3\xf8f\xa9?J\x80}kel\xc2?\xb1\xbbJ\x12\x04N\xda?\xe8\x9d\xf4\x9d\xac\x8f\xe6?\x13!IZ\x19\x04\xd6?\xffU\xce\x16\x08\'\xe5\xbf\x90\xdcf\xeb\x12x\xda\xbf(\xe3\xe3\xac\x80Q\xfe?\xbb\xceX\x1eH\xdf\xf3?\xbc\x12jb\xe4L\xec?\xd0\xd6\x95\x14V\xe6\xb2?\xf9\x93m\xff\xceD\xe8\xbf\xa3*w5\xe1^\xe7\xbfa\xd8\xcb\t\x11>\xdb?\xeb4\xd9\xe7^G\xe1\xbfw\\<\xfe\xe4\xa8\xb3?9\x01\xe8\xf3!^\xdc\xbf\x14\xaa\x15d\x0e\xf7\xa3\xbfC\xb8\xa0\xb1YO\xe2\xbffJ\xa18C\xff\xd3?F\x8a\xe9R)\xb0\xac\xbf\xbcz\x85\xb9\xc8\xc0\xe1\xbf\x8f\x07\xf8\x1f\xa4\xfe\xe9\xbf\xdb\x94.Wa\x8a\xf9?J|\\\xf2;,\xe7\xbfU\\Z\xf3\xce\xed\xc3?\xa8\x93\xa2\xb0f_\xb3\xbf\xee\xb1\x884\xe7t\xdf\xbfz\x888\x03\xdd\x06\xf2?hNzU\xb7,\xdb\xbfx&@\x13\xb1<\xd7?_B\x83B\n\x06\xe1?\xa1\xe6<\xbc04\xdc?\xee\xbb\x81_\xc9\xc2\xd3?\xe8=\xc7[\xe7\xc5\xe1\xbf;a\xbd\x9f\xd5\x02\xb3?\xd5-\x9d%\x0b&\xcb?\\\xf4R\xc2\xfc\xc7\xc0\xbf$\xab\x81\xee\xf9\x1f\xe8?f\x081\x08e\xe9\xb4\xbf,\xe0Qg\xf1\x93\xe3\xbf\x08\xa2S.B%\xc1\xbfS%\xa5h\xa93\xee?\x8a_\xec\xbe\x02\x18\xd0?z>`b\x87\xf0\xd1?(\xb4\x9d\xb4\x1e(\xe3\xbf~M<:x\xe2\xc2\xbf]\xe9y\'Z\xae\xe9\xbf\xf3\x07\x89\xaf#\x96\xbf?\xf6\xf2$,\x9f\xe3\xe6\xbf~\xcf|\xce\xb2\x18\xcf\xbf\x96\xb2\xab\x8af1\xe0\xbfu^D[\xb3\x81\xe8?\xac\xde\xd8P\xb1t\xfa?-\x02\xb75\x08\xd3\xeb?\x92\x0e9\xe7B\xcd\xa1?\xa2\xe4?5:\x1b\xcb\xbf\x85Lj\x06Q\xff\xd7\xbfB\xc0\xa7\xba|@\xc2\xbf\xde\x18i\xc1\x94\xeb\xd2\xbf\x93\xe5~x\xe2\n\xd3?]\xfd\x13\xb9\xcf\x94\xa1\xbf\x0b\xae\xf8S;E\xb3\xbfx\xefo\xb2\xda\x08\xd8\xbf\x14"K\xb8\xbf[\xe4\xbff-\x0c\x0c\xa7"\xcb\xbf\xed\xce\xc8"C;\xb7\xbf\xe5hqo\x05\x90\xd7\xbfe\xc1\x1d\x9b \x10\xe6\xbf\x1d;\xd7\x92\x1e\xa2\xe0\xbf\xb7W0\xa4\xb7\xbf\xa2\xbf"\xb0\xf2UW\x0c\xdf\xbf\x1a\x18\x19\x86\xd7\xad\xe3\xbf\x83\xa0X\xbc\xd8h\xe2\xbf\xc4\x94J\xfb\x0e\xab\xd7\xbfI\xbf\x99}\xc7;\xd9?Z\x97\xa0|\x1f\x97\xca\xbf\xd6=(\xcd\xe8\xe6\xb9\xbftO\xa5X\xaf\x15\xd2?\xe2\x9c:\xf4\xe2N\xe1\xbf\xb3\x8c\xf6\xc8\xec\xc7\xba?Q\xa0\xaf\x0ct\x9b\xd4?G\x00\xfbqY\x07\xe6\xbf\xc1\xa0\x10wV\x1c\xb6\xbf~A\xdb\x0e\xec?\xef?\x1f\x1bB\xda\x0cE\xe7\xbfh\xd3\x13\xdd5\xe7\xfd?\x82\x98ZQ\x17\x8b\xcd?\x0e]\xc2c\xfdh\xde\xbfb\x14\x92\x0b\x81p\xca\xbf\x00%\x84\xaa\x97\xe5\xea\xbf`\xe2\xe9\xfe\x06\xe5\xaa\xbfF\xddc\xcb\xa0\xd8\xdd?\xaa\x12\xc9\n\x07$\xcc?\x84\xa5\xd1]\xef\xf9\xe0\xbf\xb4\x8a\xbd\xba3\x9f\xe8\xbf#2\xd6\xe8\xdd\xc3\xf1?\rY\\K\x03TX\xbfo\xe3r\x0e\x87\x16\xc4\xbfY\xd7\xa5\x8b\xf7 \xe3\xbf3\x99\xd2U\x0e\xea\xba\xbf\xadi_\xc3\xa2\xce\xce\xbf\xfb\xb6\xebE\nX\xb5\xbf\xb9\xa95\x80\xc1\xe8\xe7?ya\x95\x07%\x16\xfc?\xa7\xbd\xdb\xa0]p\xad?\xbc\x156\x9b\x05\xf1\xed?\xfe\xa7r\xdf\xf7\x08\xd9\xbf\xcb{A\x0b\x8d\xd9\xd9\xbf.\x05\xa5S\x9e\xe4\xdc\xbf/3)Q\xd1\x87\xcd?T\x95e\x18F\x05\xe3\xbf\xe6\x19T\x94\x8c!\xcf\xbf\xf4\xdfm4\xdbP\xdc\xbfX\xd6\xbf\xd5>\x8a\xe2\xbf\xe0\xe1!*f\xc7\xe8\xbf\x10\x0cn\x92h\xec\xbe?!\x0f\xf6v\'\xfa\xf0?\x92\x05\x9d\xed\x89\x19\xd5\xbf\nV%\xa8\xad\x8c\xdc\xbf\x9f\x9d\x93\\\xfa\xf9\xac?\x0bxA\t\x9fc\xe3\xbfh\xca\x0e+\x9f\x02\xec\xbfh\xca\x06<\x14Q\xe1\xbf\x06\xcb\x19\xc4(y\xb0?\xd5\xb9\xa7\xc8\x9f\x06\xf7?k\xba\xfa\x84\xc2\xa7\xf1?\xb1\xdfd\x92\x85<\xee\xbf\xb7\xf5\xe5\x17]\x9e\xdd\xbf\x97\xea\x9c\x06\xaao\xd2?\xa6\x1d2\xcc\xc2\xa1\xe4\xbf\xdb\xb5\x11\xf2p\xc9\xcf\xbfK\xd1\x10(\xd5\x9c\xe6?\xfe~\xb49\x1fX\xc2?-F\x84]q\x9a\xdf?3^\xfd\xa2\n\x85\xe9?\xc7\xdb\xd64\xf1\xd0\xc6\xbf\xaa\x04\xeb\x888\x1d\x83\xbf\xbb@\xd3\xca\xac\x9b\xf0\xbf^\xc0\xc2\x85X\xf3\xe2\xbf9\x9a\xcb[Al\xca\xbfPy\xf3\xb7\xf8\\\xe7\xbfK[\\H+y\xd7\xbf<\xce\xd8\t)>\xa4?8R\xf0\xc6l`\xde?\xf0\x92\x8dz\x9dQ\xcd\xbf\x8a\xce\xd4\t\xffX\xbd\xbf\x1d\x9b\x03\xa8\\\x12\xe3\xbf[\xeaco\x04j\xb1\xbf]\xd2\x16\xfd\x84\xc7\xcb?Sq\xb1\xf7hp\xed\xbf0\xe6\xdf4\xf5\x8a\xd8\xbfb\x90\xb3:t\xea\xd3\xbf\xca\x80W\x10\x9a\xe3\xf4?x\xb1\xd2\xc6r\'\xe0\xbfa7O\x14@\xea\xe6\xbf\xdd\x16\xfe\xc4\'\x01\xed\xbfs\x8b{\xfa\x1f=\xe1?^\xf6]\xb8\xec\x06\xe8?g\x1f\xb6\x8c\xd6\xcd\xe3\xbff\xe2\x87q\xc3}t?\x9b\xe0n\xcc\xc7\xff\xb8?O4\xad\x86J\xb1\xd6\xbf\xd76\xf8\xb0\x9f\x8c\xc9?\xf7\x8b<\x84{\xe4\xc4?Y4+B\x17\xba\xee?\xe83\xcf\xecW\xfc\xc2\xbf\x8f\xdc\x99\x8c[\x01\xd4\xbf\x9d\xfd\x87q\n\x07\xd0\xbf\xf9\xc4w\x05\x1e\xcc\xd9?\xb7*\x04B\xc9\xa0\xe9\xbf1\xd3\x041{\xa8\xeb\xbf\xafs\xe3\xc5\x8b\xa7\xe2\xbf\x1b\xb2SH\xc8\x82\xd3\xbfdQ\xd4\x07\x00G\xfc?\x91\x87*\xa0\xf9K\xe1?\xe9\x05\x8b(\x8a\xf5\xd3?\xaa7+\xa6\x1cw\xe1\xbfLr\xfd\x12\xec\xcb\xf4?*\\\x90y2\xa4\xe0\xbf!Yq\x00\xda\xec\xc0\xbf#eK\xc27\x9b\xf1?\xc7\xd7iK+]\xc2\xbf%\x00%\xe15\xa2\xe3?\xe8\xad^\x9d\xe2\xcd\xd4\xbf\x12P\xcf\xe9\x95\xc0\xad\xbf\xc7\x85r\xf3YM\xdf\xbfs:\xe2\x80\xba\xe2\xba?\x8a\x1b\xfe\xbe\xc20\xd4\xbf\xf1\x1c1\x89\xdb\xf3\xb6\xbf\xb6\x0f\xc6B<!\xe0\xbf\xd6i\x1c\xbe\xab$\xea?\xe0\x147\x10T\xfc\xe5?\xa6\xb0\x12\tc\xde\xe7\xbf\x8e\x1b\xb4\xbbf\x15\xaf?\x98\xfb\x90\xe4|\xa1\xda\xbf\xcb\x028\xe3\xf0I\x99?\xb5\x8c\xc7\xc1\x9a\xa5\xe0?\xeb=w\xba\x8f\xc8\xc1\xbf\xeb\xb1\xa2"\xc3\xf7\xde?v\xf0F\x95\x0f>\xca\xbfk\xa8n@\x06<\xea\xbf&\x80R\xcd\x93K\xd4\xbfI\xc6t\xbeM\xd6\xe0\xbfglx\xd1\xe00\xb1?k\x19\xc9\xe4\x8e*\xdc\xbf\xb2P\xd8\xfaRX\xe3\xbf\xaf\x83\xa3\xcfe \xa3?L\x05@\x04s\x00\xe4\xbf\xe1\xae\xa1Rfd\xe4?_m\x99\xbd\xd2%\xe1\xbf\x19*\xfb;3\x03\xe3\xbf\xc3\xd8BqI\x9a\xe4\xbf\xe1,l\xc3 \r\xc9\xbf\xb8\xb8_\x8c\x88\x03\xe7\xbfX\xaf\xcc\xaf\x14\xa6\xb7\xbf7eW\x10\xf9\xa7\xdc?\xcd\x90\xee\x9e\xc7+\x92?\x01\xdf\x89@\xc5\x96\xdf?`yb\xbf\x88\x15\xe0\xbf\xacF\xa5n\xd7\x1f\xcb\xbfP\x92\xf8\xa2\x1eV\xa0?\xaa\xa6\x1e\xf5\x9d0\xdc\xbf\xfe]#@UB\xf4?O\xd8\x9al\x15\x9d\xe2\xbfD\x8b-\xe0\xfa\x91\xda?~B\xbc\x951\xaa\xd7\xbf\xcb\x19m\xc6\x94N\xe4\xbf\xa6\xb5\xec\xe4$:\xcd?\xda\x07\'\x0c\xfe\r\xe3\xbf\xf6Ov\x0ce\xaa\xe6\xbf<N\xd6\x950\x80\xe2\xbf.|ZQ\x08\xd8\xd2\xbfGP\x9fU4H\xe7\xbf\xd6\xc2\xff\xf8\x1cr\xf8?,\x9a\x8es\xc0\xa5\xc7\xbf:\xfcx?\x92"\xe6\xbf\xfc\x9b\xb7\xab\x97u\xe4\xbf\\\x9c\xb4\xf9\x1dW\xb1?\xfe\x040\x10\xd1\x11\xfa?70\xaa\xe4,\x04\xc6\xbf\xed\x1b\xce\xab8\xc1\xda\xbf#\x9b\xbc\xc3\xa4\xea\xd9?o \x18\xb8\xf2\xa6\xc4\xbf\xbb[1F\xa0\x10\x9c\xbf\xfazZU<j\xe7?w^4LN\xec\xdb\xbfT\xd5;\x86\x112\xe4\xbf\xb7H\xcbC%Q\xe2\xbf^6{ze\xe6\xe2?-\x03\xe8\x8a\x00\x97\xf3?\xa0\x81{\x83\x7f\x86\xd1?\x03\xff\xf0\xe0R\xb8\xd6?4Q\xd6\xb308\xc0\xbf\x98\x080\x1f\x86\xd6\xbb\xbf\xb5\x12\x8b\xd5\x96\xcb\xeb\xbf\xa8\xfa\xebo\xff\xed\xa1\xbf\x90\xe8|+\xf6W\xdc\xbf\xe0A\xbc\x13l\xb0\xe1\xbf\xba\x02\xfdf\x10l\xf0\xbf\xed|\x98\x83\xa3\x9b\xac?GF\xe7\xce\x03\x86\xb2?\x07\x81\x19\xb0*U\xe0?R\xe2\xdf\xf7\nB\xf5?\xf3\xe7H\x19\x81b\xad\xbf\r\x06\x1e\xc3w\x17\xe4\xbf\x92\x1c;=\x90\xdb\xe1?\xf9\x82KY\xd0\xe2\xde\xbf(j^5 A\xe6\xbf\x0c\xc1\x99HL\xe4\xdf\xbf\xd5\xaa\xc0\xf3\x7f\xaa\xe1\xbf\x95m\xcc\x07n\xfa\xd2?\xfe\x9b\xaf\x98\x87\x8f\xe4?<\x03\xac\xbcP\x01\xe3?\xbas\xdb\xc9\n\xcb\xe8\xbf\xb9\xe6\xde#\x93\xdd\xf1?\xcc\xcbv\x92\xa3\xf8\xe5\xbfU.i\xba\x1al\xf1\xbf\xfbT~\x80\x82\xc5\xe6\xbf\x87\xdc"Y?\x9c\xea?\xbd\xebv\x97C\xd3\xe1\xbf\x1c:\x15S#\x9b\xf0?1Ym_\xc0\x88\xc0\xbf\xaf\xac\x113Lo\xe1\xbf\xbb\xf7]f\x90D\xb3?\xef|\x10\x1f\xfcm\xdf\xbf+\x9cy\x1a\x80\xcf\xdf?\xa4p\xd57\xa4g\x9a?\xd5\xcc\x8d\xe5L\xde\x9e?\xa2w\xfdj\x8df\xda\xbf\xdc\x16F\x89\xb8 \xee?\xb1I\x9b\x02\xb8\x9f\xe1\xbf\xc9dH\x94\xfe\'\xe1?\\\xc1\xfd\x96\x82\xbf\xf5?C\x08\tl~\xe0\xf5?L\xdd\xfb\x04QE\xdf\xbf\xb4\x88\x8d\xaf\xc9B\xe9\xbf\xf9(\xd9\xfd\xc7T\xea\xbf\xbbz\x0fk\xf3\xa8\xd4\xbf8\x808z\xb9\xb6\xd0\xbf\xe8\xe98>\xf8\x15\xbf\xbf\xa8\x7fT\xb8\xf80\xd8\xbfJ\xd6o\xbf\xc9\xdc\xf9?\x82k\xbc\xca\x8a\x05\xda\xbfX_\xa2\xbd\xbf2\xd3\xbf\x9c;s\xd9\x7f#\xe7\xbf\xa8l\xee\x03\xf8O\xd7\xbf~\x80^\x1a?\xb3\xe8\xbf\x9b`\x9a-/\x1e\xef\xbf>\x00\x1f\xac\xc2\xdf\xeb?\x0eW+\xa6\x99\xbd\xe2??3\x0b\xf8\x12w\xd4\xbfl7\\Mryw?N\xc3\x19f\xcd\xe6\xe9\xbf\x80\xdbz\x91\x18\xc4\xb4?_@I\xcbE\x9b\xe8\xbf\xe0\xb6Y\x80\xf2\xe5\xff?E\x06\x1f\xb1\xa8\xe4\xd2\xbfu2\xa1\xbb\xe2[\xe3\xbf\xe33\xca\xb3\xc1\x06\xd8?Y\xa0\xb2\r\xb0\xb9\xe7\xbf\x9f\x1da\x03\xa3\x19\xd8?\xb0\xa0\x1f\xc6\xf5\x9f\xb5\xbfNN=\xb0u\xab\xf4?\xe3\xd6\xe4m\xe2\x9f\xe7\xbf>\xc2\x18Va\x89\xe1\xbfY#\x9a~\xa9\xc8\xb0?\x86\xa2\xdb\xdd&\xdb\xf0\xbf\xee[\xa0\xb0\xa4\x03\xe5\xbf\xb5=\xd1O\xedb\xe2\xbf\xeeBsy\x1dQ\xda\xbf%&\xfa]}#\xcb?pc\xb7leV\xdc\xbf\x88(\xec\xfa\x9a\xcf\x95\xbf\xa9\x1f\xe2]\xf5\xc6\xd6?\'3a=\xc4>\xe1\xbf\x8e\x9b\xad\x81g\x8c\xe3\xbf\x0b?s~ZK\xd3\xbf\xe9\xc0R\x92\xfd\xce\xe2\xbf\x82u\x1f\xd8N\xd1\xad\xbf \xa2\xae\xada!\xfa?g\xe8\x80\xce\x88\x97\xef\xbf\xff\x1a\xdb\xf5F=\xeb?\xb5N\xfd2-3\xe7?\xb34\xc1>\x88\x06\xdf\xbf\xbe\xba\xda\xe1\xbcx\xd4\xbf\x8d\xd2\x95Q\xc6u\xe5\xbf\xafU\xef\xfbj\xbb\xc3?\xfa\xe2\x7fp)=\xd6\xbfo<\x1b\x983\x06\xb2\xbf\x87\xb4\x06Zl\xe6\xe0\xbf\xdc\xc8?J-t\xe7\xbf\xa5\xc38\x11\x9d\tp\xbfx\xcd\xb3\x02\x19\x1e\xc1\xbf\x96a\xab@\x04l\xd7?\x18\xe1\x95u\x12\xbe\xe3\xbf \x98\xd8\x0f;#\x9d\xbf\xb0\x08\xa5\xdf\xcd\x9a\xcf?:\x11\x88\xb5Y\xbf\xa8?\xdc\x8d$\xe5\x81\xab\xd3?U\x8b\x95\x11\x0c\xd5\xf5?Y\x8e\xc7\x82\xf0>\xaa\xbfA9\xb8\xa5\xa3\x07\xe0?U\x89\xb8^c\x86\xd1\xbf\xb9\xe1\xeb\t\xcd\x1e\xe2\xbf\x8f\x14W3H\xd7\xce\xbf\xd6m\xd6"b<\xf0?LjP\x19\x01s\xe3\xbfa\xb7\x7f\x04t\xa9\xb5\xbf\'EK\rD\x06\xe1\xbfz3-+\xe8\x00\xcc\xbf\xe5\xda:\xb4\xd9\xe7\xed?\x91dY\x07\x96\xa4\xd1\xbf\xc6\xabIs\x02\xc8\xfc?\xcdj\xea\x95@E\xe7?$r;C\xe84\xeb\xbf\xbf\xda\xe1\x03"\xb8\xe1\xbfz}4o\x02y\xe5\xbf\xae\x99\xef\xfc`\x8d\xdc\xbf\xf4\xa5\x9a\x86\xfa\xdb\xe8\xbfrO\x87\x0b\xae\x8b\xd7\xbf\x1f=DB\xcc\x11\xf1?\xf6\xcbE\xdd-\xc6\xe5?AV\xc8\xf0\xb2s\xee\xbf\xe7};\xf1\xb3\x0f\xe0\xbfu)d\x8e\xc9~c\xbfF\x05\x8b\xef\xfa\xa7\xdc\xbfd\xd4\xd4\x88\xff\xce\xe2\xbfl\x9d%\xabx;\xe9\xbf\x8c5\xc1\xe6\xcd\xeb\xc9?\x14Q\xbb\xb2\xc4c\xd2?\xf0\x9e\x12B8P\xee?\xef\tE\x0f\x903\xb6\xbfR\x9f\x96\xdcc\xd6\xb3\xbf`\x02\x13\xd9\xf8\xe4\xe4\xbf6\x8d\x91a\x0b\x16\xf2?\x90Jdf\tH\xb0?\xf0\xc9\n\xf1\x12\x88\xdc\xbf\xfb \x13\xbb\xe91\xe1\xbf-\xd3,\x1e\xfdE\xd1?%J\x01\xa4\x90U\xcb?\x86`\xe8n&G\xcc\xbf\xcb\xee\xec\xbc\xca4\xe5\xbfl-\xff\x0c\x90\x1a\xd2\xbf4\xa1\'`\x00H\xc6?\xcbK\x1cc\xfb\x08\xe2\xbf7#EF\xe2\xe3\xe1\xbfD\xe5\xfa\x03\xf6\x8a\xdd\xbfWi\xbe\x9d\xcf\x18r?Z\x07bJ<v\xe8?6]H[\xbe\x85\xdf\xbf\x03\x9d\xf2jo\\\xe2\xbfl\xae\x1cn\x80\xba\xe2\xbf\xf8\xba\xdc\x9dSf\xe0?\x835i=\x04\x91\xe5?iL\x8aPj\x93\xdf?^\x9bq\x0e\xf8\x04\xe4?\x7f\xc7\x04\x1cE$\xde?\xa0\xfe\xf8\x14\xab\xac\xc2\xbf\xf7\xda\x9f-9\n\xc3?#\x92\xf54\x03y\x00@\xc9\xc1\xb9^V\x9b\xea?\x9b\x83\xdc\xd9fe\xd2\xbfR\xc5\x9e\x81\x856\xe0\xbf4.\xff\x92\xdc\x0f\xd3\xbf\xd0\x04Q\xd1\xff\xa3\xe5?\xa8\x8c?j\xa5y\xe8\xbf\xc1U\xca\xf6\x88\xf7\xed\xbf6\x00\x11P\xfe\xa7\xe2\xbf\xbe\x9b\xa6\xdeB=\xe7\xbf\xb7\xdd2\xdd\x9eg\xef?\xa9\xb9$\x883\x80\xe0?\x11\x1c\xa4\xee\xd91\xb1?\xc8\xab\x1a\x08\xa4_\xe4\xbf\xd8\xa5\x8b\x85z\x17\xfd?,\xfaw\xb9\xc1\xb2\xda\xbfu~\xf9\xa4\x0eh\xa5\xbfFu\x1e\xf2\x921\xf2?\xa3D\xd1`\x83?\xd7\xbf]k\x8a9\xfbE\xb7\xbf\x94\xd6\xfd3\xf1\xc0\xbc?\xe8J\x96\xf2)\xa5\xa3\xbf\xb7\x18S\x12\x0f\x06\xdf\xbf}\x02\xe3\xa24\x92\xdf?d\x87\xd7r\xc3sj?\x95\xf6\xf8\x93\xea#\xc1?\x8dN\xf7\xb1D\x1e\xe0\xbft\x89\xf2`$\xf6\xe0?\x02\x12\x07\xb9\x82\x9c\xe1?W\xb0\x8eWYL\xe7\xbf\xe99v\xf7\xe1w\xd0\xbf:\x1d\xad\xff\t\xac\xdc\xbfsW>\x8aqZ\xa5\xbf\xa3@\xff\x80\xe1\xfc\xf0?\xfci\xddo!\xfa\xe1\xbf\x1f\x86\x16\xf7EN\xd9?\x05o6\x80\xdf\xfc\xd0?\xa88\x7f\xc7\xb6\xd9\xec\xbf\xcf\x161\x03\xb6\x06\xe0?\xa8\x18B\xaf\n\xbb\xe1\xbf\x80\xa2\xa6\x0b\xdf\xd1\xb3?\xe0\x92\xe7V\x81M\xc1\xbfUaA\x97-\x9a\xe9?pTc\xc1\xcf\xde\xd0\xbf\x80QC\xd4\xf0\x00\xe9\xbf\x9f3\xcb\xe9_\x11\xf0?\xbe\x92hI\xe7\xaf\xe1\xbf\xcd\xb1J\x93\xe3(\xdf\xbfab^\x15\xf3\x86\xe6\xbf\xae\xe4\x05\xaa\x9e<\xc5\xbf\'J9z_\x92\xdc\xbf\x88\xaf\xe1N|\xf1\xc7\xbfV\xb2ef\xdb\xab\xdb\xbf\xcf\xdd\xb8\xe6\x0c\x03\xd4\xbf\xbf*\x1b\x90\x10\x8d\xd7\xbfe\ru\xc6\xd3\xd4\xcf\xbf)\xf3\x0br\xc2\x15\xd7\xbf\xe1\xa8\xe0\'\x98h\xd7?\x83\xb9\xb60`i\xe7\xbf\xb4Jy#\xc3q\xe7\xbf\x05\x85W\x86\x0c\xd0\xe1\xbfr\x9a\xbau$\x07\xdd?Tf\xb8+Sv\xe3\xbf\xcbg\xdc\xafK\t\xe8\xbfz\x0e\x1f\xdcz\x80\x81\xbfEVonE\xd3\xdd\xbf\x85\x01\xff\xc1#4\xda?\x8f\xf1a5\xb7\x1f\xd7\xbf\xd3\x9a\xccr\xa9\xcf\xc6?\x0c\x13?0\xd11\xdc\xbf\x83\xd4%+J\xd7\xe0\xbf)\xc8\xc0naF\xc8\xbf\x90\xb7p\xb7n\x04\xe7\xbf\x86\x17\xc2\xd5\x8b\x10\xed\xbf\x06s*\xd1Z\xe1\xe5\xbf\xc0\xac\xccq\xbf\xab\xec?\xd2\t\x1cW\xfb\xad\xe5\xbf\x99\xf0(\xdf>\x80\x98?\x8c\x9fVOw\xf4\xf4?\x9a\xce|\xbb \xaa\xcb\xbf\xcf\xe2\xc0\xaf\x04\x04\xc0?\xc2\x1e\xbdq\xcb\x94\xa5?\xf8\xa0Q\xd9\x9d@\xe5\xbf\xf5\x04\x16\x0c:\x82\xe4\xbf\xbdk5%\x05\x90\xe2\xbf\xcb\x19\x08\x05z9\xd7?aN \x1e\x95\xe3\xeb?\xf3\xa3k\xe6\xd91\xc6?\x8f\xdd\xd3r\x15\xb6\xd5\xbf\x86\xa1\x1e\x0fZ\x19\xd8?Y\xf0\xc8:\xf9\xfb\xf4?\x00aa\xc4\xe1d\xcb\xbf9y\x13T[\xbe\xc5\xbf\x0c\xee\xd7\xb2\xc0\xda\xee\xbf0\x04\xe0x\xc2,\xe5\xbf\x91M\xae\x9f\xba\x07\xf1\xbf_\xd4\xe6y[\xfd\xba?Ix&\x1c\xd4\xcb\x85??\x88\xedSDo\xfd?\xa9\xc1\xd3\xd4@f\xe1\xbfP\x97\xf0\x1a\xaf\xa6\xe2\xbf\x9b\x13\x06g#!\xe8\xbf\xbe\x14\xda\\\x7f\xcc\xe2?]|)\x98\xe1\x97\xe3\xbf=H\x02\xc1\xdbe\xc0\xbft\xad|\xb0\xa8\x04\xd5\xbf\x07,\xd3\x94\x1f\'\xf8?\xce\x01\x1e\x80\xa6_\xc2?\xe5S~\xd4\x94\x96\xd4?\xd8c\xa1\x9e\xd0_\xfb?\x95\xdb\xc6\xdf\xc2\xf5\xe8\xbf\xcf\xff\xa3Y\xe9\xb2\xd6?6\xdc\xfcVf\xd4\xe1\xbf\xb9)\xf3|\xfd\xf7\xf1\xbf\x83`\xb8W_\xdc\xd7\xbf&\x8d\x11`d\x8d\xdb\xbfU\xa3\x04e\xb2\xf7\x96\xbf\x14\xca\xcc\xe9\xfeF\xee?14\x08~#Z\x86?\xb5;?\xbf*\xaa\xc4?~\xfedR\xd7\x8a\xd4\xbf\xc5\x15\xa2\xbe\xdcH\xe0\xbfq\x10b\xee\xa9\x01\xda?^\xef\xfcJ\xc3(\xac?\xd6u\xcd<\xfd9\xcd\xbf\x18\x1d\x18\x19\xd9\xe8\xe5\xbf\xaf\xd3\x96\xee\x94\xaf\xf7?\xe7\x11\x8eM\x99\xd3\xe2\xbf\xff\xde3\x92G\x7f\xa9?|\xb4\x85\xa6\r\xff\xed\xbfn\xb7\xe2W\xf9\xd1\xf0?\x81\xff7\xa3\x17\xfb\xd6\xbf\x1f\xaf.\xea\x87\xd5\xe6\xbf%y\xd0\xa8Q\xaa\xd5?\x99.P\xa3\xb6\xa9\xe2\xbf\xcc\xce\xe3g\x0f\xb3\xc6?\xbd\xa6\x97\xed\x1c=\xc6?H3\xe2aH\xc4\xdc\xbfy\xd2\xf7\xa2\x8d\xf1\xf8?mE\xfe\xd3M\xf9\xf0?\xda#$\xa1\x02H\xa4?W|\xec$\xc87\xe7\xbf\x12"\xa9\xb4Ij\xdd\xbf\xba\xfca\xa6]g\xd2\xbf\x86XM\x1ar\xac\xd2\xbfY\xfeU\x8b\xe4\x9a\xe5\xbf:\x1d\xd4\xd4\x82G\xc2\xbf\xaf\xb7{\xefG\xd5\xd6\xbf\x0b\x82\xf5m\xafV\xc4\xbf\xae\x80\x9dO\xb0 \xeb\xbf\xab3h\x96\x13#\xa4?\xfdQ/\xbb\xef\x8b\xe2\xbf#\xfa\x81U\x93;\xeb?\xd5\x91>\xf7\x93\x00\xd5\xbf\xc5v\xac\xd8\x93\xb6\xe3\xbfAhP\x17\xc5\x9d\xed?\xeb\xcfo\xcdM\x04\xe9\xbf\xb8\x05hsY\xfb\xc4?\xba\xe5\xe1\x1f\xc7D\xd6\xbf\xdd\xe6\x93[\xad\xf5\xf1?H\xa3Zy\x9c8\xee\xbf]\xf1<\xa2\xde\xed\xe0\xbf\x98\x82F\x869n\xc6\xbf}?p\'^\xfa\xed\xbf\x16\xff\xc4\xbb\x0c:\xec\xbf\x08\xc3s1\x89\x94\xe0\xbf\xc1\xdf \xd2ic\xda\xbfN\x9f\xa9\xeb[(\xc8\xbf\xf0\x16O\xa15J\xe0\xbf\x83\x99\xb4\xbb\xab\x9d\xcd\xbf\x1c\xa8\\m\xb9\xa4\xc1?)by\x1f\xf5\xdb\xe1\xbf\x12\xc4\xff\xf1\xceg\xd5\xbfS\x94\x03\x15\xbd\x97\xd1\xbfu\x8bg^\x99\x1d\xd5\xbfZ\xa4\xb8\x07)\x8a\xcb\xbf\x03\x86\xdc\x98\x1d\x8e\xe9?\xa0\x8f\x01\x9eK\xb4\xf0\xbf\x86\x13u\xc6\x95\xc8\xe3\xbf!4\xb2\xc5\xc1\xe4\xe7?\x96)\xd5\xd3\x9aE\xce\xbfW\x1c\x95\xd7\x0c\xa8\xd8\xbf\xcd\xcf\xc9\x0cr\x93\xd6\xbf=\xccI\xb7\x0c\x9a\xc7\xbf\x16\xd6\x9c\x04Kq\xd7\xbf\xa0\xa1\x02\'\xb7-\xce\xbfK\xba\xb0\xa9\xe5@\xe0\xbf\xf9\x93l\xaa\xff\xb9\xd4\xbf\xda\x9c!\xa7b\x9f\xbb\xbf\xebj\xe0\x80\xb0v\xd3\xbf[:\xfbJ+\xf5\xf3?\x1b\xc9\x86?S\xd1\xcb\xbf\x8aSN\x97\xef\xcc\xa3?8\x00$\xef3\x19\xd5?\xe5\x94\xeb\x16\x1b\x9c\xa6\xbf\xae\x05\xf7O\xf62\xd8\xbf\x10R\x1e\x90\x15\xb1\xda\xbf\xd1\xb9\x8ag9)\xd3\xbfE\xd3\x1a\xe9[\xe6\xe1\xbf\x95T\x94\'P1\xc5\xbf3\x8f\xd2\xe7\xde0\xdd\xbf\xed\x17\xb3\xed\x1d\xe8\xe3\xbf\xa8\x12\xb8\x15\x90\x9b\xa2\xbf*\xbf\xd3EG\xb6\xe2\xbf\xba\xe9e\x9a\xe0\x12\x95\xbfa^"\x9f>\x15\xc6\xbf\xacv\'j\x86u\xc8\xbf\x8d\x92\x7f\xee\xf2\xaa\xfc?\\\x90\x9b\xdfq\xe1\xd6\xbf\x84\x92\xf7a\x00\x83\x89?\xcdu\xcc\xf3\x00\x15\xfe?\xecw?Db]\xda?\x8bs.\x11\xca[\xe6\xbfy8\x86\xac\xc3\xda\xe4\xbf\xfc\xdc\xdd\x10\x9dn\xc3?i5T\x067\xec\xe8\xbf\x8b\xafU\x0c\x82\xb2\xbc\xbfa\xd4\xba\xae~\xa7\xe1\xbf\xf4\x87\xa8\xbdR\xb9\xe3\xbfc<\x91\xe5\xf5\xc6\xd2\xbf\x83c\\\xd6\x1bX\x9b\xbf\xaa\x19h\xd2+@\xad\xbf\x04\xdf\xb2#\rT\xe5?\xb2\xba\xbc\xa9\xf0\xcf\xe2\xbf\x84\xaa\x08\x897B\xe7\xbfV&V\x19_}\xca?$\xad\xd7*\xf9\x17\xda?\xe4YF\xfd\x90\x86\xe0?\x18\xf4\xd6\n\xd2\x0e\xc1?_\xe3\x86)\x8e`\xdf?\xc5^\xc2L\xcf\xec\xc4?\x05\xec\x8039\x99\xfb?\xa7\xc2\xf1\x97\x06\xd1\xaf?k<\x81p:\xe4\xe1?e\x13\xe3\x9cT\x90\xe2\xbf\x06s4\xb6\x9c\x12\xde?w\xbe?sF\xb3\xb3\xbf\xe6A\xd8\xb1\x16\x07\xc0\xbf\'1\xe5I\xf5\x10\xe6\xbf\xaa\x01\xf9!\xc0\xde\xab?\x7f\xae\xf3\x87T\n\xc7?\x82\x88"\xa1\x81P\xe3\xbf\xa4\x02\x17\xac\x91\x19\xd2?\x7fT\x88{s\xd4\xb1?\xec\\\xbf%\x9ah\xc9?;\t\x82\x8c@-\xcc\xbf\xed\xfb\x0f\x05O\xa1\xe0\xbf\xa4\xe2jH\xd4\xe0\xda\xbfN\x1aP\xde3\xac\xca\xbf|\xbc\x83\xee\x12\xed\xeb?.\x96\x15l\xc0\xa6\xc4?\xad\x0fa\xaa\xe3u\xfb?\x01\xde%\xc1\x18\xcf\xd2?\xd1N }wl\xdb?)b\x84\x95\x13.\xe4?\xc6\xa2\x00b\xfc\x9b\x81\xbfP\xf7\xb7\x1f@\xaa\xc9\xbf4D\x9b_h\xf8\xd5?(5\x1f\xad\x12\x8f\xce\xbf\x84Z \x02\xc1\x86\xdf\xbf\xdd\xc8oR\x99#\xb5\xbf\x90h\x96\xae\xeel\xe0?\xd2\xf4\xbb\xeaE\x07\xc9?F\xfc\x1bm\xf7\xc9\xe5\xbfq\x94{\xf3\x04n\xcd\xbfW\n\xc2.\xa9\xf0\xe5\xbf\xc2\xf38E\x10\xb5\xd3\xbf\xcb\xeb\x01\xfce\x87\xb9?+\xa9\ti\x9c\x0b\xce\xbf\xcc\xac\xdb3\xfe\x03\xe3\xbf\x9bqT\x0c\xf4\xb4\xd7\xbf\x80A;?\xbe\xb6\xe1\xbf\x96O\x1d\xbakm\xd8\xbfa\x0f\xe5V\xd5Y\xcc?xp\xb8\xa6`<\xd6\xbf\xe4\xb6\x8c7\x8a*\xd2\xbfQ3\x19\x83\x8bZ\xe4?5o\x91\xf4\x8d\x94\xd6\xbf\xa4\xd8\xfb76\x0c\xdd\xbf\xf7\x8a\x98\xd6j\x8f\xc4\xbf\xb9\xbcll\x8c\x18\xc9\xbf\x7fV\xd8Qn.\xca?a\x88\x05[5(\xe0\xbf\xd4 \xd7\'il\x9d\xbff\x04D\xc2\x804\xe3\xbf:\xbb\xfa~\xfb\xa1\xe5\xbfv\xd2\xfa\x8c\x0cI\xdb\xbf\xb4\x17\xfc`~\xfe\xd8\xbf\xe8p\x15\x0b\xe5r\xcd\xbf\x00(\x0eX\x17"\xda?\x89\xd5\xe8#\x85-\xd8\xbf\x0c\\\xfe4u1\xc4\xbf\x02e\xec-S\xf6\xd9?6N\x19~\x98\x7f\xe2\xbf\xfeOzwS!\xf1?\xd2{\xae@h\x98\xe1\xbf)\x97\xb5[@\xb1\xcb?e\x11\xfc`\x13x\xc9?>%"r:*\xf9?\xdcG\xefn\xa0\x01\xd3\xbf\xafGX\xbcn\xec\xde\xbfT\xa3$\xcd\xe4\xc1\xe3?x\xce6\xaf8L\xe1\xbf/;D\xb5\x0fh\xdd\xbf\xc6\x1e\x0e\\\x13\x0c\xc1\xbf\xc6\xcd\x7f\xc6\xa7\xb6\xc3?\xceQY\xee\xd1\x84\xd8\xbfhLy)\xf0G\xc0\xbf3\xaa1\xfb.6\xe1\xbf\x04t\x14\tm\xa7\xae?2\xca\xef \x83\x1e\xe5\xbf\x086G\xe6dt\xf6?\xb2)\x0be\x8f\xcc\xb3\xbfa\xfex\xb6N\xe1b?\x19\x17\x9fhC\xde\xd6?1kam\xb0\xd9\xe4\xbf1Jf%\xab*\xd3\xbf\x8da/\x99\xfc\xae\xa0?{E\x8c\xe0\x86\xfd\xcc\xbfDQ^e4\x9b\xe7\xbf\x8c?\x0f\x91\x84s\xcb?\xb7\xaf\xfe\x81V\xcc\xd3?\xde\xe4w\xc2\xb0N\xf5?\xd6H\xa4\xc5\xd6\x1b\xf5?qF\x98\x0b\x88vQ?7\xf2\xbd\xf2\xbd\x03\xa3\xbf\xe2\xe2`n\x051\xe0\xbf>\x11l\x97\r\xb2\xbb?\xf7\x9f\x07\x12M\xfc\xe2\xbf\x06l\xcbF\xcdz\xd4\xbfPr\xcf\xec\xc4\xbf\xe8\xbf\x9a]/\xfe\xbaA\xbb\xbf2\xd0\xf7\x00\xf5\xee\xe4\xbf\xfc\xc8\xcd\x96a/\xe2?\xca"\xaf\xe7\xf92\xad\xbf\xdb\x0cY\xd8\xdb\xed\x90\xbf\x86}\xca\xb7\xab\xe4\xc8?\xf4\r>"z\x89\xb4\xbf\xbf\xf2\xde\xb6\xdd\xda\xe4\xbf\xb1\xaax\xf2\xb6\xef\xd4?\x03\x1d@<\x851\xdb\xbf\x19Fc\x0c,T\xd7?\xb6O\x06\x90\x92|\xbd\xbf\xa0\x9d\xacl\xcf\xcc\xc9?/\x97\x9e\xae\xb1\xa1\x80?\xcb\xf1\x92\xda\x8dI\xb9?\x8fI\x19\x8a\x7fs\xe3?\xe6\xd4h\xe1~T\xdd?W\xd9\xfd\x91\xab=w\xbf\x89\x16\x1e\xee#d\xed\xbf\xc5S\xd3\x10S\x9e\xcc\xbf\xec\x92\x9c\x01\xfd\xd1\xd6?\xff\x0f\x10\x0cYM\xdb?\xcf\x93\xe4\x02s\xd2\xcc?\xf2n\xaf\x03uW\xe8?(\x93n\xdd\x9a\xb1\xd8\xbf\rT\x17\xc5\x81\x03\xe6\xbf,f\xd4\xf2\x12\xbf\xce\xbf\xfdV\x98\x18\x8b\xa7\xc0?\xe1\x0eG\x86]\xf5\xe9\xbf\x1bj\x9ag\x0c\x98\xec?\xb3\xabZ=&\x9e\xc6?\x0cqd\xb8\xda\xb2\xfa?i\xf07n\x85&\xc7?\xd5\xb5\xe5\xbc\xeci\xd0\xbf\xa0\\\x1fx\xe8T\xdd?(\x94)e]O\xe7\xbf2b\xd8\xba\xec\xfb\xd1\xbf|\xd0\xd0#9#\xcd?\xd9\x81.\x81\x89o\xd0\xbf\x85/\xf6BR\xf6\xc8?\xb2\x1fj;t\xa5\xe3\xbf\x075\xde\x99G\xcb\xee? \'\x99\x9b\x17W\xd1?I\xe4l\x148s\xc5?\xcc\xb2\xcfb\xb0\xef\xf0?>\xe5;\x98aG\xdb\xbf(\xb8!yv\x11\xcb\xbf\x83\xba\r\xc5\xc6&\xce?\xb5\xb6\xf6}\xfd}\xd1\xbf\x1b!\x07\xd0&,\xd2\xbfy\t\xe4\x07o\xd9\xe3\xbf\xd2\xe9\xa4>e\x80\xd3\xbf_\xe6+\'r?\xe2\xbf\x138\xe7\x8d\xb9_\xc9\xbf\xecvY\n\xf5\xae\xed\xbf\x8c\x01g\x86\xe8K\xaa\xbf\xb7\xde\x9e\xda\x1d\x00\xe4\xbf\xc4\xa9\x92\xa7\xfdD\xde\xbf\xd7txx\xf9\x02\xf4?^\xc8\x15\xb8b\xb1\xe2\xbf\xa5\xe0\xdb\xad\xd4\x15\xac?\xa9\x85\xc9\x85\x8bk\xd7?2G\xdaGnL\xd3\xbf\xfe\x03y\x8f\x1e^\xdc\xbf\xc1)\xe9\xd4W\xcf\xbc?K\x0eZ>\xcf\x8b\xaa?\x99\x90\x84g\xb5|\xe3\xbf\xad\xbd\xab\xf2=\xe8\xdb?f\x8e\xbc\xe9\x9f\xca\xed?tG\xee\xf4\xca:\xdb?\xbf;\x86:\x88\x04\xe4\xbf\xf9e\x90czX\xd7\xbfu\xaa.\xb9\xa9\x16\xad\xbfOA\xab\xf8\xe5k\xd2?\x15\x1a\xd0\x88f\xb5\xd4\xbf\xb2\x8e\xaeZF\xd9\xc0?\xe0\x1aR\xa34j\xe0?\xd6\xcb\xc7\x7f\xac\x80\xd7\xbf\xebjs\xcc\xad>\xe3?\xae\rm\xf4G\xc5\xc4?\xdb\x95z\x95<*\xf0?i}\xd9\xf7\xd5\xe3\xe6\xbf\x8d\xbfs\xadS\x06\xc0?6\xa5G\x80h\x80\xd6\xbf\\+\xc7\xb1\xc8\x02\xbb\xbfc\x9d\xa0cF\x89\xc5\xbf$\x9b\xdd\xaf\x96\x81\xcc\xbf\xb6\xb9\xbb\x1f ]\xd9?\x15\xb1C\xc2\x1b\\\xdc\xbfnF\xbf\xf4Mj\xe0\xbf\xf8)2\xd9:p\xf2?yp-\x97\x10\x15\xd8\xbf\xd7\x8dY\x07\x03Q\xc9\xbfh]:\xbb\x97}\xe0\xbf\xf5\x8b\xcc\xed6h_\xbf\xc2\x01\xc7s+\x8b\xaf\xbf\xc2\xa2\xeem\x0e>\xdc\xbfb\x89\x18\x1a\xbd\xff\x9f\xbf\xd9&\x88$F\xdc\xc1\xbfB\xe9\x9dT\xc3\x03\xfb?\x1amEE\xda&\xd8\xbfm\xcd;\xe9jK\xb4\xbf\x9fj\x9f\xb2\xc75\xda\xbf-V6w,/\xe5\xbf\xdfBX\x14\xc7\xef\xdf?`c\xe9\x8f\xf81\x99?0\xe5\xbd\xe9\x18\'\xc2?\xcc\xcf\x04h\xbc\xe3\xe7\xbfj\x1b\xed~l\xe7\xe1\xbf}\x95\x80\xd6z\xb6\xd7?\xbd.E\xecXw\xda\xbfASZ!\x07\xab\xdb\xbfKk\x1c\xa0\xec\x81\xe9?lp#\xae\x1db\xb4\xbf\x82\xdb\xa2E\xafZ\xc1?)\x81$\t,\xe8\xdb?<CsW\x1e\xf2\xd8?<d\x865\xaaq\x84\xbf\xa0\xd0?\xb2) \xd5?\x15HF/\x89\x80\x9a\xbf\x15]\xc8\x18\x9c\xdf\xe3\xbf\xa5\xee\xecC.\x13\xe1\xbfjTf\xd4gv\xd4\xbf\x9c2\xda\\\xdd\xeb\xe0\xbfN\x1dc\x1a\xdd\xec\xc3\xbf\xef\x98\x98\x9e\xc2E\xd5\xbf\xd9\xbd\xfe\xdcP\xf2\xa2\xbf\xdf\x96\xc4\xce\xc7\x81\xc5\xbf%X\xe7{\x1fI\xe1\xbf\xdf8\xb3d\xc0\x9b\xc0\xbfr\xe2a\xac>\x98\xb4\xbf\xe8S\x9c\x10\xc19\x96?_h\x8d\xfa\xcf5\xd2?x\x19W\x98\xe9\x02\xaa\xbf4s\xd2\xd6\xd3\xcd\xe0\xbf\x08\xa4\x0e>T\xb6\xa2\xbf\xcb\xd6NK\xa9+\x00@Ie\x06\xf9\x97\xf7\xe6\xbfT\x8e\xdc\xb2\x13\x05\xe4\xbf\x1f\xc1$=\xbfV\xd9?\x87\xf8\x04=\x06|\xe5\xbf\xa5,\xb9\xfcpN\xc9\xbfO\xe3\xfc\xef~\x1cf?n\x00za?\xda\xdb\xbf\x9c\x15\x00\xa64\xa3\xe1?\xfe\xc5\'\x0b0\xa2\xf4?\xb1TJ\xcd\xfa\x00\xbd\xbf\xc0\x81BbO\x1f\xe5?\x15\xc5\xf3\x9f\xe3\xd0\xe2\xbf\x14*\x8d\xf7]1\xe1\xbf"\xda\xca\xc8\xedK\xb8?l\xde{\xc8\xaa\xa4\xcd?\xea\x94\xcf3\xc6R\xd3?|\xa1o\x1c\x01-\xc3\xbfx\xab\xed\x8d\xed\x8f\xe1?\xdd\x84u\xecP\xd9\xed?%\xda\xb7g"\x90\xe1?n\xbcg\xb3\xd4\xae\xcf?\xfb\xa2\xaf\x00N\x93\xf0?\xa6\xa4\xcb\xfa\xfa\x97\xca\xbf\x045cu\xf9\x98\xea?\x85j\x91\xb0&\xaf\xc7?_~a\x05\x94\xb2\xab?^\xba_\xba\x90\xc4\xe5\xbf.\xc26\x00\x90\xba\xd4?V\x1dd\x83\xa3\xe5\xcd?\x1a\xf1*\xf9JH\xe2\xbfM!f\xe4\xba\xfd\xf5?x\x03\xef\xc5\\\x0b\xde?[\x019"\xfcO\xe5?\xb9\xb0?\x00r_\xe2\xbf\xa8-\x9au\x93\xd3\xda\xbf\xed\xa8\xc6\xbe\xff\xc8\xd5?\xf4\xbc1><\xb8\xd7\xbfxO\xcaz\x96R\xd0\xbf\x9bz^m\x02?\xd9\xbfZ\x04/\x98\x82\xdd\xf2?au\x87t!\xbf\x98?\xf8\xdes\x9f/8\xcc?P\x16.m:E\xe2?\xfc\x18\xbbK\x0f,\xcc\xbfiA\x99\xe0\xdf\xce\xd7\xbfp\xc5\xb5\xf4jm\xc0\xbf\xc6\xa5\xb3\xa7z9\xa0?\xeb\x1f`f^9\xe2\xbf\xf6wx\xc2\x92\xaep\xbfo^z$\x12|\xd6?sEM%X:\xee?\xd2\xc3\x91\x8b&\xf8\x9a?\xf6/\xcd:\x9d\x17\xf8?\xd7X\x19\xfe:7\xe7\xbf\xbc\x13\x17d\xa2B\xda\xbf#S6\xbe\xd6#\xcb?\x7f\xf8\xefx\x0eL\xc9\xbf\xf3\xb7\x04\xc5\xe0\xb6\x8c?\xed\xc5\xf8\xc1\x9c\xf9\xda\xbf\xd1Z>\x03sX\xcf?\xee\x19\xba\xad\x8c\x0f\xd7\xbf\xb55s\xf4\n\x0c\xc9\xbf\xe1\xb6po1@\xdf?\\JD\xe6dL\xca\xbf\x88\x07\x89hU\xae\xf1?.\x94\x8e2\xd6F\xee\xbf\xd9\xae\xb7\xa1\xf9\x1f\xf0?\x12\x17\xa5\xf2\xfc2\xd5\xbf(T\x07\x04\xf1\x1d\xc5?\xdf\xc0p\xaf\x81\x1a\x97?"\x96\x1a\xba\xdc\'\xe0\xbf\x18\x06z4\xf4\x93\xcc?\x14|.H\x02>\xd7\xbf\xf9\x9b+\x1b\x95\x88\xc0\xbf\xa0\xf4\x02\xc7\xae,\xe4\xbf|h\xf7\x9b\xbe\xe3\xd3\xbf\x99K\xcc\xd8\xd6u\xb2\xbf\xf8\xa1\x08\x9b\x9d\xa0\x97\xbf\x90\x15&T\xe4v\xc0?\xb8\x066\x10#\xe3\xd4\xbf\x1e\x83\xe6\x80"e\xda?\xa2\xe5\xf8\xc0\xee\xe4\xd3\xbfh\xbch\xbb\xcd#\xf0?\x03\x92{\xe4\xc05\xe1\xbf\x0e\x14%z\x00\x00\xe3?\x922\xb1\xcd\xb1\xd8\xe8?\xde\xc6\xe4%\xcf\xdf\xf1?\xff\x1f\xfc4\xa7\\`?5\x02\xfd\n\x9cE\xcd\xbfD\xe7\xc5v\xef\xb2\xb5\xbfS\xb1+\x97\x0bh\xe1\xbf\xac\x92\x0e\xd3\xf1\xc1\xdb\xbf\nr\xa1\x94\xe2\xd3\xee?\xfbP\xf7\x87>\xb7\xe1?U\xe8&\x19\x8d\xfd\x98?\xb8Sv7\xef\xe5\xa8?3\xe0\xe7\xc0\xdc\x15\xde\xbf5%\xcd\x08\xf1k\xb5?\xafD\xf4\x81\x7f\x85\xe7\xbf\xe2\x08n^=v\xfa?\xef4\xb3(e[\xdf?<g*\xecLm\xf4?S\xe2\x14\xa5\xc3i\xe5?\xdb\xb2\xf5\xb6\xae&\xe0\xbf\xe8\xb0\xfe\xb1\xf8\r\x86?\xd4\x96\x80g9\xb5\xbc\xbf\xf2\xa3\x93RW\x9e\xdf?\x05\xdf\xef\xa7\xc0\xee\xe4\xbf\xc4\xb7\x02Y\xbb\xba\xc5\xbf0\xb9\xc0\xb9\x88\x04\xfc?\xc6\xfa\xfe\xde\xa9\x1f\xf8?\xfd\xa4J-\x94\xcd\xfd?\xe0B%u\xee\x98\xa3?\x00;\xa1\xb3\x01#\xe2?\x97\xfa\xcf\xf6=\xc3\xde\xbf$\xefD\x00\xb5\xe1\xc1?s\xc2\x88\x92\xfb\n\xce\xbf\xb8\xe2\x1cb{\x85\xe3?V\x12\xc1D\x88\x19\xe9\xbf9\xfd\xd7\xe8\xad\xd6\xe1\xbf\xa8\x99\xff8r\xef\xdb\xbf\xdc\xe4\x96\x0e\xd1\x0b\xf0?\x86m/@)\x18\xb8\xbf\\\x15\xfd\x90\xb6w\xd4?U\'\xd2u+\xe2\x91?\x9eL)\xfa\xed\x9b\xd7\xbf\x08\x8dMDE\xa1\xe5\xbf!n\x1f\xc9\xda\x9e\xfc?\x11\xc3\xbe\x9b1r\x8d?[\xa7\xb9\xadT\xc8\xbf\xbf\x8b8c\xba\x1a\x12\xcd\xbf\xf5-\x1f3\x85SQ?mo\xb85\xf5\xd2\xcc\xbf\xca\x9d]g\xd6\xd7\xdf?t\xf6\xccF\xb3)\xbd\xbf>n\xce:\xb9\xfd\xf3?"\x9f\xf9\x8e\xa9f\xdb?\x9ez;x\xcfG\xe1\xbf\xe3%|g\xddS\xdb?D\x17\xe7\xa9{\xb4\xf1?U\x01^\x85T7\xd4?\x169\x1dx\x1ey\xaa\xbf\xfd\xddm\xa8p\x0b\xdf\xbfejx\x824\x8b\xd7\xbf}\xd2:\xf0\xe0R\xe5\xbf]`\xa9jk+\xc5??\xc9,\x8d\x9dT\xd0\xbfi\xe0J\x17>\x1d\xc0?\x84\xefs\xe0\x98\x1c\xfa?I.\xbb\xc7\xber\xdc?e\x0b\x84\xfc\xfbSt?\x1e\xf8K\xb7z\x18\xc4\xbf\xd9\x97\x04\x06$\xa4\xd5?\x80\x173\x8f\x93_\xd2\xbf\x95b\x04\x96:6\xde\xbfS\x7f\xf8\xde\xba\xea\xcc\xbf\xd9`S"\xdc\x97\xd7?\x87/\x9bP\x1dA\xf1?\x8c\xaa%\x1bj\xcd\xdf?`2\x95z\x19\xc8\xd2\xbfJ\xe1\xfc\xa9\xe3\x89\xfc?\xe1!~\xca\x89\xc1\xde\xbf\x87\xc6Uxe\x0e\xa1?~M\x10\xe7-\xd5\xeb?\x89\xc1:1\xed\x90\xe4\xbf8\xac\x7f\xaa\x8e\xa9\xb7\xbf*Y\xd3\x94_\x14\x89\xbf\x14s\x19\xbe\x04\x80\xc8\xbf\xdd\xec\xa9\\1\xdc\xa3\xbf\xa3\x9bS\xfb\xe1\x8c\xe8\xbf(y\xb5\x84\x80\xcd\xc5\xbf\xe9\xb9\xd7\x84\xf4\xfd\xe2\xbf\xa8\xe1+\x00\xa2~\xd0\xbf\xa0\x10\x8e\r\x06\x97\xd8\xbf\xd7.\x9f\xca\x96+\xe3\xbf<\xe5\xd1Ajw\xa4?\xa7\xfb?\xa2,3\xd5\xbf=\xb7\'P\x99P\xeb?\x87\xef>\x9b,\x17\xcb\xbf8H\xdd\xe8#\x1f\xa9?a\xb6\x03\xd0\xd4\xf8\xe7?\xf7a\xda\xccS\xb4\xc2\xbf(\xe4\x10LL\x81\xe3\xbf\xff1\x0c\xace\x05\x95?\x11\x96L\x08zx\xcc?\x85\xc9Kc\xa8\xb3\xbe?\x94\x85\xbd\xb9w\x0b\xec?\xb3\xcc\xb5\xefNU\xec?\xc3\'\xba\xd8k\x07\xba\xbf\x0cG45\x84\x17\xd9\xbf\x1eC2a!v\xc8\xbf\x8d\xc0\x0f^\x82H\xd6?\x7f\xf5pL\x89\xd1\xdb?\xf6m\'\xd6\xd6\x99\xea?\xcc\xe3\xc0\xb5\x94\xb3\xdb?\x1f\xb3\xdaE\xcc\x9d\xf0?J\xba%\x06\x88\'\xde\xbf`\xb7\xf3B\xdf\x14\xf2?R\xeb\x9c\xdaE\x99\xe5?Fq\xb4\xe1I\xae\xe1?\xae#7\xc4o\xa0\xdb\xbf\xaf\x81F\x1aM\xc2\xd0\xbf!\xadRf\xa0\xa4\xc2\xbf\x7f\xf0\xb5Y\x04\xee\xa4\xbf\xee-\x8e\xd8\x89B\xf0?\xe4\xeb\xeb\'\xf1b\xf6?\x89\xda1\xa5c\xc1\xab?\x13\x08d\x9a\x91\x1d\xcd?\xae\n\x18\xd7\xe0\xad\xe0?\xb6\xa8\x1fy\xa2(\xff?\x11\x17:\xb3\x86y\xcf\xbf\xe4\xbf\xeb\xfegP\xa3\xbf\x1b\xffo\x93\xe5\xac\xe0\xbffd\x85\x01\xa1+\xd7?\xe6\x9a\xe5\x1b?p\x97?\xbf\xfdCX\x90\xa1\xe6?\x11\xa9\xf7}\xcc\xe7\xe4?\x84\x89K\x7f\x1fG\xba\xbf\xf0\xa2\xc6\xc5\xd4\xbc\xf6?\xe9\xba\xe2\xd0\xf5^\xd1?(U\x12l\xd9~\xe1\xbf\x05\tx\x9a\xac\x88\xdb?<4\xd6O\xa5*\xe5\xbf\xdd\xf1\xb8\x17|\xa7\xe0?s\x85|i\xdc.\xf2?\xfa\x1e\x95\x9c\x05\xbb\xed?\xad\xeb\xf4dY\x00\xca\xbf}\xb0\xf3u\x95\x13\xe7\xbf\xae\xab/\xb3y_\xdb?\xb7L5\t=\xcf\xdc\xbf\x10\xd7U\xd8\xd9\xfb\xb6\xbf\xad\x0f\x92\xa1\xc51\xf9?\'\x82\xc5-f\x8f\xde\xbf\r5\x19\xc8\x13~\xe0?\xe8S,\x95\xfeW\xed\xbf\xbc\xe0\x04\x1f\xdf\xd0\xcb?\xb6\xbeY\x10i\x03\xac?\xefc\xc6BA\xd0\xb4\xbf\x9a\xacvu\t!\xbe\xbf\xc7y\x06\xc0\xcb\x87\xe5\xbf\xe9\xb6P\xac}\x88\xe1\xbf\xa2\xc1X\xb5-\xe3\xd6?\x90\xc9\xc4\xad\xa5\x0c\xe7\xbfQ_,\xda\xf1\xb0\xd1\xbf_3\xa5\x9f?\xbb\xd8\xbf\xf8ha\xa1\xf1\xc4\xc5?\xdc@`\xb1\xe7\x8c\xca\xbf\xda\xd6\x8a\xeeo\xde\xe2?\xe0 f\xd5\xd6\'\xd1\xbf\xcfv\xe6/\xf4\xa7\xd2?k\x00\x86\x04\xd1\x1c\xe9?l\xd8\xb3H\xbc\xdb\xe4\xbf\xca\x91\xbb\x01X\x10\xbf?\x14\xad_\xadm\xf6\xe3\xbf\xfb\xc2\xc2#\x8f\xc4\xd9\xbf,\xd8\xa4%\x93\x02\xe7?\n\x83\x9f;\xa0\x08\xec\xbf\xf7\xe1\xac$[N\xe3\xbf\x89\xa1\x90\x89\xbb\x1e\xdb?\x9b\xa3\xbc\xd5\x86!\xdf\xbf\xde\x17\xdf2C;\xdc\xbf\xfb\xd72\x01UM\xe8\xbf\xdc\xe8\x1c\x1c\xe2\xbd\xa0?\xeaY\xce<\xcc\xcb\xeb?\xe1 \x04Z\xde\x8d\xef?\xc2\x01_\x14\xd3\xd9\xdd\xbf\x9bc\x97\x04\n\xb7\x92?3\x12\x0f\xd4\x90\xce\xe2\xbf\xff\xe8\xa8TA{\xde\xbfnb\xc1\xc9\xbd\xbd\xb4\xbf/\x15\x08\x1e\xd0\xe3\xe8\xbf\xd3\xbc\xe3\xa6J<\xe1\xbf\x8bS\x88\xa8\xa3q\xc4?\x1c\x95c:\xc5\xea\xb3?iP\xe6V0\xd1\xe9?[\xa8n\x80\xcd\x7f\xde\xbfpP\x01\x80\x1a\xf5\xae\xbf\x1eMx+)\x95\xe6?\x1b\x0fY\x9e\x00z\xcf?f\x05\xad\x99\xb0\xd6\x97?\xcb\xd9\xbc:\xd2\x89\xa3?n\x96\xceV/\xa2\xd3?\xee\xb4\xec\x81P\xaf\xe5\xbfU\x01\xd8\n\xae\x01\xc3\xbf\x81B\x8d\xad7a\xb9?\x86*e\x8d\xaf\x14\xe1\xbf\xfc\x8c\xf1gi\xf3\xf1?\xd4\xe0\x98\x84\xb4\xa8\xc8?\xbe2\xa3\xcd\xc4\x80\xdb?\x95\xb0\xab+\xcc\x17\xe4\xbf\xfe\x159\x1b\xc66\xc6?t\xf7\xe1\x04\xad\t\xd9?\xc8wE"\x87U\xb0?\xc9\xbf\x8f\x1e\xc7\x96\xe3\xbf\xefFB\xfb\xb9\xba\xe0\xbf\x9eN\xd66\xe6h\xd3\xbf\xba]\x9a\x1d\x83\xc6\xce\xbf\xf2\x8e\x1a:\xe3\xe0\xd7\xbfy\x12\xc1\xc4@\xbc\xd4\xbf\xf6I\xf4\xa0]\xc3\xd5\xbf\x10&*\xd9\x87\xc7\xd2\xbf\xb3;\x919\t:\xe3\xbf\xa7d\t#s\xaa\xd5\xbf\x8c\xc9f\xe2\xbc\xbb\xe6\xbf\xfe\xf8V\x01\x0e\xe3\xcc\xbf\x0eA`\xdf\xdbX\xd7\xbfaYH{\xf1\x17\xda?\x1fc\xc1t6\x1c\xec?\xda\x15X\x17\x93\xe5\xfa?\xb3\xef\xf8\xa1s\xa5\xe7\xbf5\xc5|\xcb>o\xdf\xbfaY\nYMX\xc4?e\x02\xba8\x86"\xd0\xbf\xb6\xab\xe8\xcd\x9d\xb6\xed?\x02@\x8f\xb2\x04\x83\xde\xbf-\xf1`Ze`\xe2?\xd6\x155\xeb\x0f\x0f\xcb\xbf@\xcf\xa3\\\xa8\x1c\xea\xbfs\x1e\x05K\xb2\xd3\xc4\xbfWb\x16\x1b\xe5\xb1\xbc?\x9d\xea\xcdG\x11\x16\xe3?\xd9\x1e\xda\xd6\x0f\x96\xf1\xbf\x15\xfe\xaf\x87\x07\xe9\x00@A%\xc6\x00\xfcn\xda\xbfRn\xa6\x97`\x9f\xcb?\xd4d\xa2\t\xc9\x85\xd4\xbf#\xd2\x80\x07>%\xe0\xbf\xcd\xbe*:?\x86\xd8\xbf#\xac\xce\x96\x9d\x9b\xa3?\x9e!\x15\xec\xb1/\xf0?fO\xa6\xc1\r\xf1\xe9\xbf\x81\xb1\xe8\xe5\xc1\x9f\xe8?\xf5\x9fO_@c\xde?\xd0\xd8\x9e!m\x17\xdd\xbf\x8f\xf3\xf3\xe47f\xdf?\x9e(Vb\x8bj\xe6\xbf\x93\'\x05\xd0$C\xa6\xbf\xf9q\xbf\xfe\x10\x7f\xdb?\xd2\x9fCdf\x01\xc7?\xe1\x9d\xd6S\xee\x02\xdf\xbf\xea\x1b\x12l\xe4g\x94\xbfB_\x90Y$\x9b\xc7?\xb6\x95s\xe3=\x9d\xd8\xbf\xc0\x15O7\xad\xf4\xde\xbf\x7f\xf5\x19\xd5\xd4\xaf\xd9\xbf\xe7\x02Q\xad\xd2\x07\xe4\xbf\xd6\xda\x8d5Z\x0f\xe2\xbfZ\xaf\x8bCH\x86\xb9\xbf\xf8\xd8\x98\x0c\xa0\xf4\xf7?T\xd2\xc0M\x9f\xf6\xb6\xbfvT\x1f\xf7\x81\xcd\xdf?\xb5Qh\xf6\xf4\x9c\xb5\xbf\x17&n{V\xbd\xe0\xbfoXHH\xd4\x9d\xc1?H\x9e\xce\x8e\xf2\xbf\xe2\xbf\xe3\x12\x13\n\x115\xc5\xbfZ\xdc\x99\xb3q\xec\xd6?\xc6\x14h\xb3\x1c\xcb\xd1\xbf\x06\x0fx\x19\xd4\x80\xca?n\xfbq\xfcEx\xdc\xbf\x89ae\xc8\n^\xe1?\x94\x0e\xe2\xa1\xe5g\xbd\xbf\x08P\xe7P\xc1\xfd\xc4\xbf9]\xdd\'\xc1\xb0\xd5\xbf(\x0crk\xdc\xcd\xa4?\xf9\x83\xe0\xde\x01\xf8\xf6?L@\x90R\xce\xe1\xc6?\xc1C\x1b\x16^\xec\xc1?\xfaD,\x05\xfb\xa3\xc2\xbfZ\xa0\xc5\x0cp%\xe9?\xbe\x80\xc2,\xb4S\xdf\xbf\x82\x13\x128o?\xbd?\xa3\x8c\xe7\xc0Bf\x84? \x01\x99\xa0\x0f\xa2\xb7?\xce\xf9\xb3\x0e8&\xe6\xbf \x13\x8d\xcfD\xc9\xe7\xbf\xc5\xf7\x1e\x10<;\xd9?\x82\x05\xd0\xa8Y\xa2\xba\xbf\xe1}B\xff>\xb35?\xb0\x9e\xa0\xa9\x16\x17\xcc?\x96\x19\xff%\\j\xd2\xbfMct\xf4YY\xe1\xbf^\xc2\x7f\xc5>\x18\xe5\xbf\x93\x1dT\r\xea0\xf4?\xfal0\x06\xa6\'\xf0?3\'\xc4(\x19\\\xe5\xbf\xe1\xb8\xe9\x88\x0e]\xe4\xbf\x0f\xfe\xd9\r\xad\xbe\xd4\xbf\xca\xc6\x15U\xf6\x95\xc1\xbf0\xbe\xc3,\xd9\x8b\xdb?\xd6\xfc\xa0\x11iX\xcb\xbf\xac\xd8\xc9;\xf3o\xf0?\xb2#s6A\xef\xba\xbfK\xf5}$&r\x99\xbf\xc9"SGwv\xce?\xbc\xde\x1c\xc3\x9a#\xb2?`\x15F\xe0H6\xd1\xbf\x18\x93<\xb9\xc7c\xed?\xea\xd3i7.\x13\xe1\xbf\x02\x845\xe2\xb19\xe0\xbf\x12\x95\xd3C\xc4\xee\xe5\xbf\xb6\x86s\x146bA\xbf\x8f\xfe\xc5\xb7N\xa5\xd5\xbf\x1a\xc9\x07O\x14\x92\xe8?h@\xf3<\x00\x01\xec?j*\xaa\xc7\xd6V\xd7?4\x18\x10\xd7\x18s\xe0\xbf\xa4\t\xba\xb2\xcd[\xc3\xbf\xc7Y0\r\xcc\xee\xbb?\xaeM\x8bQB\x00\xe2\xbfx\xc1Sz\x1fQ\xdf?\x88\x9cr\xd7\xd5\xe7\xd4\xbf\xf2\xbaB\xd7tx\x9b?)\xb2\xa2\x17v\x98\xf1?\x9c\x8e\xb5\xf8\xc8\x1b\xc4?\xeb\x1d\xd9K{\n\xde\xbf\xf7\xc1\xae\xb5\x88\x92\xd1?\x15\xb8\xe5\x8e\xf7D\xea\xbf\x9a&\x85\xfc\xba\x87\xa2?\xe6\xff\xc6\xfd\xcdI\xcf\xbf\x87uQ\xcf\xeck\xe9\xbf\xeb\xbb\x98\x91\nM\xe0?=\x1f*\xd5~c\xde\xbf\x9e\n\xae\xa0\xf5\x88\xda\xbfH\x98\xf2 /\x89\xad?\x9d:\x18N\xd5R\xe5\xbf\xda~\xc6\xaf\xcb\xde\xcf\xbf\x16L\x91C}&\xe3\xbf\xd4<i\xc55\x84\xd3\xbf?\xd1\x1f\xd1\xab\x17\xd5?\x94\xc3\xf8\xb0\x85\r\xe8\xbf\xff\xb3m\xac\xe1G\xc7?IX\r\xf3\xd6\xeb\xb1?)v\xb2\xe6?,\xe8\xbf\x14\xcb\x1f\xdadd\xc9\xbf*tY\xf5L\x15\xd0\xbf\xf3\xaa\xb7i\xb7b\xc2\xbf\xb89\x8c/\xc8;\xe0?\x7f,\x00]\x82\xb1\xd4\xbf\x92o\x7fiNI\xc1?\x1b\xe2\xf27/\x18\xb5\xbf\xa8\xc3II\xe2A\xf7?\xc1\x0bifu\xde\xc7?;(\xd9\xc0\x05\xd1\xb5\xbfv\xf7,X\x89\x81\xeb\xbf,a0\xe4"p\xdb\xbf \t\xdfJL\xda\xd5\xbf\x11[b\xa6NY\xcd?\xecd\\W#W\xb9?\xedu.\x0f\xc5X\xee?vr\x96\x024V\x81?d(\xb6\xb1\xc6\x97\xde?\xb06\xe4Ys\xef\xe2\xbf\xc3\t J\x1f\x11\xb2\xbfM\xaa;\xf9\xc8>\xbd\xbf\x91\x8d\xf9\x91\x94|\xd1\xbf6M$\x18\xf5\x8c\xd9?j\x08\xef@\xedp\x96\xbf\x9a\xa8\xbf&X\x98\xcc\xbfZA\x89sD\xa2\xda\xbf\xa17Z\x17\n\x94\xf4?\x83\xf8\xb0/\xbd\xa7\xfd?)X\xb9jH\xc5\xa1\xbf$\xd4*\x90\xfe,\xee?\x15\xf9\x15rQ\x9a\xf2?\x03G\xf0b\x85\xa7\xd1?\x04D\xf8<\xc9o\xc5?\xca\x0eu\x95\n\xfd\xc7\xbf8\xdb)\xaf\xa9\xd9\xe1\xbfk.\xacQRo\xbb\xbf\x82w\xden\xc2|\xca\xbf\xe1\x840f\xfd\x12\xf6?\x10\xa4\xd0\x8cp\xb4\xd9?\x88t\x99\xa6\xff\xfd\xd9\xbf\x93c\x04x\xbbT\xd9?\x0fu\xb8\xa7i)\xc7?\x17]\x916\xaco\xe7\xbf\x19\xbf]}\xf9c\xf2?\xa7\xda\xd2\x18\x11\xf7\xe4\xbfK\xb2\xb4\x1e\x978\xd9\xbf\xeca\xb4\xff\x84a\xfd?c\xf9\xf7<x\x18\xee?\xe3a\xa7\x94[\xa7\xec?\xe9i\x1bh\xa9\x80\xae?k\xbd\r\xbb0O\xd0\xbf'
p51
tp52
bag2
(g3
(I0
tp53
g5
tp54
Rp55
(I1
(I9
I512
tp56
g12
I00
S'\xb9\x0e\xfb\x99\x02v\xdc?\x99\x0f2\xdf\xf7\x05\xe7\xbfeo\xf8\xd3\xbe\x80\xbb\xbfUHP\x93\x03\xf0\xfd?\xe1\xe7\xd86\xb7w\xc8?*Y\xf6<$\x1d\xa9?\x99Y\x11\xe3\x0e\xf9\xde\xbf\xb14\xca\x9f\xc2H\xe2\xbf9\xf6\x00\xb5a\xfd\xdf\xbf\xba\r*\xe5\xbe\xf6\xeb\xbf\xc9\xbc\xa5X\x92\x14\xd9\xbf\xa1=Z\x95\xda\xd3\xb5\xbf\x81\xa2O\x05&,\xe0\xbf\x01\x9dD\xc7\x9b\xa2\xdf\xbf1\x01\xcd\xef \x1c\xe3\xbfM\x9a\xbe\xb1\x03\xa3\xd8\xbff\xeb\xf6>\xb2\xb7\xdb?\xe3\xe1\xbc\xce\xc6z\xea\xbf\x8dh\xd4\x96Il\xc6\xbf\n\xca\x99\xd9%\xdd\xc6\xbf\x01\xdd\xe3$\x0bm\xdc?\xe0\x10\xbcD\x16C\xe7\xbf\xacJ\x9f\xa5\xfb\xf4\xfd?\xea\xc0n]\xb2\xde\xa9\xbfb\xab\xf5\x91\x08=\xe4\xbf\xb8qyJ\xc3\xf3\xd8\xbf\xbf&\x1ej\xfc\xec\xeb\xbf\xc2:\x00\xb6\xa9\xd4\xb5?\xd2\xd5mv\x9f\x15\xe0\xbf\xfb\xad\xf0\xf1\x841H\xbf\xf2\x0eG\x9f\xbc\x91\xa9\xbf\x0c\x1f-DBq\xbd?\x90\xc2\xa4\xea\xe9\xd3\xe3\xbf\x8e\x14\x83n\x85\xa1\xe4\xbfY\xf1\xec%\xdc\x17\xc2\xbfg\xde6"G\xce\xba\xbf7y\xf5\x0e\x7fm\xcd\xbf\xf6 \xf8h2 \xdd\xbf\xb3\xb3i \xd9I\xed?"\xab\xbe\xa7\x89\xdd\xb7?\x19\xab\x87j\xab\x92\xe0\xbf\x02l\xd0p\x87l\xd6\xbf.@\xa3\x8c\x86\xf1\xe7?zC]\xce\xb0\\\xc1\xbf#&\xe6\x86WY\xbc?\x16\x0e\xdb}\xb2\xe1\xd7?\xf0%\xa6L\xcfj\xde\xbf\xa3\xf4\x02\xa7\xc1\x8f\xde\xbf\x85\xcd\xfeyQ\x9b\xf5?E\x15\xc7\x1b&p\xe9\xbf\x8ai\x03:E\xed\xe0?\x83B;O\xd9\x1b\xe6\xbf\x02\xe8\xee{\x8at\xdd\xbf\x86\x118\xaf\xc7^\xdc?~\x9b\xc5\xe6%\xc6\xe3\xbf\xdd\xd0rS\xfe+\x84\xbfDf,/\x11\x9f\xe1\xbf~\xaa\xef\xe5G\x87\xd1?\x9e\xfc\xffymK\xd0?\x98U \x9a\xf7=\xca?Z\xb1 \x8a\xb9\xcc\xbe?\xc7\xefQ\x8b^\xd8\xe1\xbf\x84S\x10\x14\x1f1b?\xf7\x1dP\xde\xc7\x1e\xca\xbfh\x89\xe8\xdb\x05H\xcc?\xe7\x05v\xfa\x91\xdd\xaf\xbf\xecY\xaf\xb5\xb2\xc8\xc7\xbf\r\xbf\xfeN\xee s?~\xb5\xa2\x89\xa4Q\xe3\xbf\x04\x1f\x16\xd18S\xc0\xbf\x99\t\xcd\x08\xa7\xff\xe0\xbf^\xdd\xd9[\x8d\x90\xe1\xbf\xe9\x8b@[\xa8\x9d\x00@\x8a+\xb5\xed\x1c8\xde\xbf?\xbd9\xc0\x06\xe1\xe3\xbf\xd7\xdb\x9d\xfc\x1c\xbe\x86\xbf\xdf\xcd\xce\xe6\xb4u\xe7?\xcbU\x1bm\xcdA\xe0?#\xce8F\x0bs\xe9\xbf/\xfclI\x97\x97\xe0\xbf\xd24@\x858\xa3\xe6\xbf\xc7\x13\xe5\x94\xbf5\xd7\xbf\x08\xb5\xf4\xa5\xb4\xe9\xe3?\'}\xe4$\xbbV\xc8\xbf\x81\x9f\xa1\xb31\xa7\xe5\xbfT\xd0\x91\xca+3\xd9?\x94Q\xd4\xe2\xf4*\xe1\xbf\xde\xc5\xc2\x1f\xae\xcf\xe9\xbf@`zA\xb6\xd9\xb6?n\x8b\x062,V\xe3\xbf\xd7\xfb\x1a\xc2\xa0\xd9\xd8\xbf6\xfe\xfb\xce?\x07\xd5\xbf\x95FZi\x16\xd0\xe6\xbf\xa2\xbe\xe9Jp\xe2\xf8?\x00\x00\x00\x00\x00\x00\xf8\xff^\xc4\x1d~\x88\xed\xe2?\xb5\'\xd2\xff\xd2\x04\xaa\xbff\xce \x17g"\xd2\xbf}\xa6\xb9_\xe7\xab\xee?\x9fZ\xdb\x99\xb5}\xd5\xbf\xff\xe3\x962\xe0\x13\xd2\xbf\xc8t\xc6\x91QF\xcb\xbf\xc4!\xe6*\xfbq\xf2?rVCg4\x86\xe6\xbf\x9a\xfbC\xbb\xc5\xbf\xe7?E\xce\xcf\xb8m\xdd\xdf\xbf<\xf6\xcf\xc6\x9b~\xb7?\x8c7\x01=,\xbb\xe3\xbf\xac\xa1\xd1\x03\xb1\xee\xe9\xbfA\xa4\x90Y\x8c\xff\xa4?\xc7w\xe7L\xfa\x17\xd7\xbf\x88\r\xbc%`\x19\xdc\xbf\xb1\x8eW\xde\xe5\xfa\xd5?/\xa1CB\xbbD\xdd\xbf\xa2\x96P\xe3S<\xd1\xbf\xc1|\xbe<So\xb0\xbf\xe8`>\xf6\xdf?\xdb?&\x0c\xfb~\xc6\xd8\xbc?Yq\x81\xa9v\xfc\xe5?L\xe1]\xa0\x89s\xdf\xbfr\xc8\xc7\x86\xd7\x14\xac?b\x94\xd3\x91g\xc2\xc0\xbf\x911\'\x9fV\xb4\xd4\xbfF\x9dG\xff\xb9\x03\xe8?&\xb3T\xfd&x\xf7?\xa8\xe6\xee|\xfd\xe0\xd4?\xdc\x11\x1crg\xd5\xe2\xbf\x07\xce\xe0*\xae\xff\xdb\xbf\x13\xe6\xc0oL\x8f\xf1\xbf\xf1\x9e\x98fj*\xcf\xbf\xc1\x8e7ky\x8f\xe1?\xff\xc9\x89)\xcf<\xcc?\x1e\xdd[\x00m\x92\xa3?\xe5K\x04\x87\xd7@\xe4?Bb\xa1{ \xbdt\xbf\xfd\xad\x8eJ[\xde\xff?\x86\xfdX\xf86|\xca?\xddoP\xe9An\xe9\xbf\x85\x8d\x15M\xffT\xe2\xbf\x0f\x91\xdb\xad\xc2\xe7\xed\xbf\x13T\xfb\xd3\xf2\x87\xcf?\x04Y\x1a\x10S\xa0\xd2\xbf\xc7\xb0\xdb\xbdi\xb3\xd8\xbf.\xce\xaa\x86>\xd3\xdd\xbf\t\xebL"\xb7\x96\xc7?\xbabr\xc3\xd7\xa7\xdf?>\xc5\xeb\xcb\xe2h\xdb?"\x95b\x1d\xa0(\xf9?\xa3\xfa*\xd1\tQ\xd6?!\x9c\xf6G\x13t\xe2\xbf\xd0g\n\x1fs|\xdd\xbf\x02\xacV\xb5[\x01\xd9\xbf\x1d)vq\xc7\xf7\xf0\xbf\x8b\xba\x0c\xbe$\x1e\xd6\xbf9\x01\xe7=\xce\xd3\xdc\xbf9\xb6\x18}_\x9b\xf4\xbf\x08af\xeb\x1b\x03\xdb?\x9f\x91~t.\x86\xfd?J\xc6N\xed\xed\x87\xd2\xbf\x0ei\x8d\xea\x11D\xb7?\x0fr\x03\x06\r\x9c\xec?\x02F\xf4\xe8\x8c\xe9\xa5\xbfU\x92\xb4\xa3J\xd3\xd4?\x83\x83\x94+"4\xa7\xbf*>i}\x1e\x1d\xd1\xbf\xcc\x7fO\x8b\xdd\xb1\xd3\xbf\xfe\xe1\x9eV3y\xe7?m)?5q\xc4\xbf\xbf9f\xf7ST7\xf2\xbf\xcc\xd52\x99\xbc\xe2\xea\xbf\x03\x1a\xbb`\xdd\xd2\xe4\xbf\xdft\x18s\x99\xe3\xe5?\x10j\xb6/\xd2<\xed\xbfi:\xb59\xb6C\xc0\xbfG\x81\x9f\xa1\x8b\xe4\xc6?&p\xd6\xbc\x97\xca\xd4\xbf<\x90\xcf\xe6\x98\x92\xd6\xbf\xae\xa8\xc3l\xb2\x99\xb0\xbf\'\x93\xe8W\xf2\x1b\xe0\xbf<\x1f\x0f\xe2\xbf0\xbd\xbf\x13\x1d^\x85i\x89\xc2\xbf<\x98\xca}\x079\xf2\xbf=\xfdHv\xe7\xd5\xdc\xbfE\xcf\x11}\xfbL\xcb\xbf\xef\xd2\xdf\x10\x14\x07\xd0\xbfD\xf3)\xb8\x7f\xce\x95?\xca\x93\xcc\xdb!b\xe0\xbf)R-m\x95\xe4\xc7?\x7f\xd8\xf24\x89h\xbe\xbf\x8a)\xef\x87\x19{\xaf\xbf\x97O\x9c$}\xe9\xe6\xbf\xdf\xff\xcb\x81V\xd3\xe1\xbf\x0cb)B\',\xe4\xbf\xd2\xa3\xb2T\x9bx\xf6?\xb5\xfb-\xa8\x976\xf3\xbf Y*\x84\xfa\xef\xee\xbfc;\xaa\xeb</\xc2\xbf\xa4\']\xaeL\xaa\xde\xbfx\xf5\x06\xe3\xe4\x8e\xa4\xbfK \xfc\'ll\xec\xbf\xc3\x92s\x87\xfdf\xd7?\x1e\x10E\'\xc9\x81\xee?\xc1\x9b!\xb4h\x05\xe1?\x1d\xe8\xb5\xb4\xa1\xc2\xe1\xbf\xdb+=\x9f\xf2\x04\xa1\xbfvk\x12\x18%v\xc8\xbf\xca\xe2\xcef\xbd\xc7\xb9?\xe8\xdcI\xfc\xcd\xa2\xda\xbf\xbf\xf8\xaf\xcf\x90!\xe0\xbf\xf1l\xc0\x9e\xdb\xa5\xc6\xbf\xafC\xce\xc6\xb0\x9e\x9e?\xbb\x00b\x0e\xd4\xcc\x00@\xff\x83\xf0h\x1f\xe0\xcb\xbf\xc0\xbfm\x11\xf1-\xcf\xbf\xaf\x84\xc3\xee\xb6\xf3\xc1\xbf%q\xbfB\x81t\xd5\xbf\xec\x8d\xb7qU\x1b\x99\xbf\xa9\xaf`\xbc\x98\x87\xec?+\x15dg\xb8\x0b\xe0\xbf\x81?\xe1\x03\xba\x15\xd1?\xd6\xd3T\x9cqY\xe2\xbf\xfd\x15f8\xb8b\xd7\xbfUF\x97\xd9yg\xe0\xbf\xaf\x92N\xa6)R\xc2\xbfX\xfc\xea\xdc\xa9\x98\xd2?M\xb6@T\xf8\x98\xf7?f\x03Hr\xd2c\xd5\xbf\x15\x1dOoEU\xea\xbf\xea\xbd\xa6qa\xfd\xd1\xbfHx5\x08u\xdf\xe9\xbf\xb3\x1fm(\x1di\xe1\xbf\xbf\xcb[\xce\x8d\xb7\xf6?\xc2\xaf?\x82\x9cc\xb2?\xb7\x87\x0f\x0b\xc0X\xcd\xbf\xb0\x0cgm\xd2\x1a\xc4\xbf\xc9\x98\xc9\x0e\xbf-\xfe?T\x1e\xe6\x01\x15\xbb\xb1?\xbf\xd4\xc2:\xeaP\xdc?\xb8O:\x06\x99f\xc2?\x0f\xe1_\x9fc\x12\xe0?\xb1\x1a\x082D\xec\xd9\xbf\x1e]\xc7\x15(\x92\xdf\xbf\xb3b\xc2\x07\xb5\xa3\xd6?*=%\x1d\xb9@\xc1?\xa2{\xb8\x88_\xcf\xb3\xbf\x90\x9cu\xe3}J\xbe?\xf24\xc9\xe5\xb7\xe1\xca\xbf\xb1k\xed\x93\xe9#\xe2?pg\x1c\x0c\xab?\xe0\xbf\x04\xf5\x92\x92\xef\xab\x00@y\x9cG\xc0\x11^\xe6\xbfG\x95\x88\x82%\xe9\xcd?\xb1\xdc\x9d\xe2p\x07\xec\xbf\xcc\xd2\xb7}\x18\xf8\xd3\xbf\x1cjN\xeaen\xf0\xbf\xfc<\xb9\xf8~\x8e\xd3\xbf\xa1\xa3+5\x7f{\xe2\xbfI\x1fBd`5\xcf\xbf\x1c\xbe\x8e8dV\xca\xbfRd/\xf5\xd9\x9f\xf0?\xb8\x810<Q\xf7\xd8\xbf\x8a>me\xf8l\xf0?$\xf0\xa5\xd0\xe8\x18\x01@9\xb1\xbf\xb0\xff"\xc0?>\x7f\x92\x80\xf2q\xd6\xbf\xb7\xa3\x16\xce\xfen\xd7?\x9b\x11\x9b\xc6\x00\x0f\xd4\xbf\xac\x1a\xf0\xd9d\xac\xd4\xbf\x04\n\xf6\xd7Z\xbc\xe2\xbf[\x91\xd1N\x00\\\xe7\xbf\x0e\x14S\x8e[&\xf5\xbf\xadyZ\x16\xb80\xd3?+\x02\xb6\x04\xe0\xe1\xd0?\x9a\x9bs\xf6\xfe\xdb\xe3\xbf\x11\xf6C\xea%L\xc9?l\xed\xdd\xd1\x04}\xe1?\xddA\xaeg\x90)\xe3\xbf\xc5\xe8\x91^\x0c\xb1\xc8\xbf\x85\xc3p\x12\x0e\x16\xc6\xbf\x85f\xeb\x17`\x9c\xde?\xdb\xfd\xbc\xa0\x14\xc0\xe3\xbf\xa3\xc6\n\xeb\x8d\xbb\xe8?t\x1e\xd2dZ8\xe2\xbf\xbdA\xbfln\xc1\xdd\xbf\x7f^\xedEZ\xc4\xef\xbfz3*0\xbaK\xd5?|\x88\x151\x8b\xa2\xe0\xbf0w\x8c\x17\x17:\xe6?\xaf0\xd9\x03\x1a|\xc1?\xe5\xfc+iY\xc6\xf4\xbf3\xa8\x07\xf9\xfbk\xe8\xbf!^\xa7i\xee~\xdf?\x17\xae\xf7B\x84\x07\xe1\xbf\xa8\xb2\xa7\xf9\xc4\x16\xd4\xbf9>\xb1p\x85+\xe8?R\xb6+8\x87\xe8\xaa\xbfn\xe0\xa6\xf4r\xec\xd8\xbf/!U\x8a\x01v\xda?\xe0U\x035\xb9\xc8\x9e?\xc1\xea\xefE\x10\xba\xe2\xbf.i~\xc0Y\xdc\xf0?\x99\x01R>h\x19\xe2\xbf*\xee\x84\xf6\xfa\xde\xe4\xbf\x82v9\x01\xe1\xd4\xdf?\xa2\x10\x9e\xb3GD\xe0\xbf\x83I]\xecZq\xe0\xbf\xf8\xf7sP\xe5\x83\x02@Y\n\x0c+\x9c\xff\xd9?o\x1f\xad\x9a\xd3\x90\xe0?\xeb\x0e\xefy\xe5}\xdc\xbf\xb4<|\xd7\xf9\xed\xc9\xbf\xe9?F\x01$\xb0\xf1?\xb3\x95K{\x8eT\xe3\xbf\x82\xf2\x00\x90<L\xcf\xbf\xf69\xabK\x84\xa8\xac?b\x94\x1c\xf3\x93\xe2\xba?\xc2 \x80q\xbf\xf5\xb7?\xf6dGY\xa0\xda\xd4\xbfJ\xd6_r\x9cZ\xe6?\xcf\xf4\xf4\xbeY\x90\xe3\xbf\x98\x00\x9a_\xd9j\xe7\xbfH\xba}\n\xa5\x97\xe5\xbf\x18\xd5a\xbe}>\xb2\xbfcK\xaaD\x181\xc5\xbfG\x10/A\xad\x90\x85?dp\x1a\xf3\xbb\x96\xd1?\xeb\xa4\xacZ9\xa3\xd6?\x97M\x11\x13b6\xd4\xbf\xc6W\xf0\xedM\xeb\xd9\xbfX\x8d\xc7\x0b\xef~\xde?\x9d7\xbe(\xcb\x90\xdb?\xff\xb4_#T\xc3\xf3?\xe0\xdb$\x11F\x1b\xca\xbfh\xc1Pj\xba\x1a\xea\xbf\xe3\xa0\x91\xba\x9b@\xe6\xbf\x19\x15J\x10\xbe\xe0\xa0\xbfT{\xc5\x86\x10\x9c\xd3\xbf\xacw\xc5\x86\xfe\x10\xe3\xbf8\xa0\x93>\xba\x10\xd2?n\xcfi\x0c\xcd\xdf\xf1?W\xcf\xd1\x82\xd4\xce\xef\xbf\x92\x9d\n\xd3,\x99\x9c?\xb4T\xd64j\xd2\xe6\xbf\xccB\xb6\xbc^\xd1\xda\xbf\xd8|(\x91\x90F\xd5\xbf[\xfa\xc1\xf7\x19\xf9\xd1\xbf\xa4l\'@o\xd5\xea\xbf\x8c\xc6j\x8b\xcb\xd3\xea\xbf\xcf\x07y\x1d\xb9\xf0\xc3\xbf*]\xcd\xea\xf0O\xeb?\xa0\xb6\xdd:\x16\xe8\xde?\x0e\xcc6\xdb}D\xe5?\xc3\xeb\t\xbb\x8dW\xc5?gB\xceh\xc9R\xa5?5Y\x12\xc7\x8c\xa0\xe9\xbf\x921\x13\xa5\x90\xda\xc6\xbf\xa8F\xcdn\x92j\xda?\xe1\x905=\xc6\xae\xd8?\x142++I\x87\xd5\xbf\xf8D\xe8\xc7Gu\xd2\xbfK3v\xb2\xac\r\xa0?\xb6\xa3\x98\xaf$X\xd2?Zl\x00\xfdp<\xdb?\xb7\x1f7\xb0h4\xe0\xbf\xb5\x1bV\xa5a\x16\xd7\xbf\xe3\x86\x90\xa0\xdb\x01\xdd\xbfg\xbb>\x94\xe9u\xe1?\xd0\xdf\x96@\xc1X\xf0\xbf\xae\xd9\xd9\xa9_\xa7\xc0\xbf\xca\xe2\x99\xae\x107\xce\xbf~\xcf\x94\x9f`T\xdf\xbf?\xe7#\xbf\x08\x88\xf1?Q\xb5\xd7\xf5\x8c\xf4\xeb?\x02\xe7\xc8[U\x82\xc4\xbf\x16^\x9f\'\x12}\xd1\xbf\xc7\xce(\xde\xc8\xa0\xda?j\xdc\xd3\xaaQ=\xef?v\xfd\n\xc8\xc1xq\xbfu\x8d/\xd1\x87"\xe6\xbfQ\xcb<\x8b\xf4\xf4\xae?\x87\xfb\x9ai\x97\xb1\xe1\xbf\xb1\x8a\xa8W\xb1\xa9\xe1\xbf\xbd@\xd3\xeer\x8d\xd9?\xff_\x184Bz\x86?cYq!\x06\xa0\xe2\xbf\x84\xed\xed\xa1fb\x97?\x06\xd3u\x8e\xa0\x11\xd1?\xf1\x0eJ\x85>\xa8\xb1\xbf8\x99\x1f\x98\x1bC\xd3\xbfNV\xb4\xebc3\xe4\xbf\'\x12a\xb2[\xfc\xc7?D\x9a\xf9\x99\xa0\x8c\xdb\xbf\xe0)s\x9d\x8d7\xe2\xbf\xef\xa4\xe8N\xca\x1a\xd9\xbfg5:i\x1c\x90\xe2\xbf\xf6\x00\xdd\xadk\x00\xd0?a\xf0%_-C\xd0?-e\xfc\x9cmd\xd1\xbf\x85\xeeb\x99|\xcf\xdf\xbf\x88V:\xc0\xde\x98\xeb\xbf\x97\xe5Qf)m\xa1\xbf\xe7\xcdd\x87\xf2\x1f\xa4\xbf\x00\x00\x00\x00\x00\x00\xf8\xff\x02y7\xc3\xad~\xd3?\xf6e3cP\x82\xe2?\xbf\x04\x18\xa4\x85\xce\xe0?Y{J\xa2\n\xc4\xe9\xbf\x07bZ\xf3\xd1\xe4\xf0?\x98\xde\x9fR\xa5\xa2\xba?f\xdb\x12\xc6\xd3\xb5\xd1\xbf\xed\xfb\x82\xb7\xe9\x01\xe3\xbf\xb7f\xd2]\xfb\x11\xe2\xbf\x7f\xdf!\x9el]\xda\xbf%qq\x08\xbf\xb8\x01@\x97\xdaf\x1b7\xa1\xe6\xbfsE\x12u\xbc\xe1\xd9\xbf9G\x1d\x17\x8d-\xd9\xbf5\x02I F{\xe5\xbf\xd6\xf6w\xb4\xe4E\x92?\x92\xa9\x13\xdc\xa4 \x95?\xcb\x9f\xf4i\xb1n\xd4\xbfbKE\xce0\r\xe4\xbfq\x9f\xfaf\xb41\xbd\xbfB3m/\x92\x0f\xc5\xbfF\x01\xe1\xd98\xbc\xe1\xbf\xc2p\xa4\xb7\x13n\xd3?!\x06}\x15F\xa0\xcb\xbf\xe0\xdal/<,\xcb\xbfJs.\xe9|\x16\xe1\xbf\xe3re\x18\x93\x85\xbb?\xd6\xcc[E*)\xc7\xbf\xd4\x80\xf6\x15\xbe)\xe5\xbfQc]r\x13\x82\xed?`\xfd\x95U\xe4n\xe0\xbf\x80\x85W<c\xb3\xd6?\x99O:#\xbad\xc0\xbfW\x90\x81\x84\xb2\xb1\xe9\xbf\xf71\x89Z}\xce\xd1\xbfJw\xab\xd4\r\xf3\xc6?\x94k\xaf\x16\x94j\xc4\xbf\x9a\xb3\x85\xcd\xdc\xa6\xed\xbf\xaei+\x1f\xb8\x97\xe0\xbf@\x05\x0e\x8bF\x12\xdb\xbf\xb1O\xfd\x91\xd4\xf1\xe9\xbf\xfe\x07\xb3\xcbha\xe6?\xeb\xf0\nl_{\xdb?\xf5v2\x1b\xefU\xd2\xbf\x16\x91\xfe\xbf\x9e\x8b\xf0\xbf{;\xdf\xb0@\xd8\xb0\xbf\xcc\x03\x18/\xf3\x0b\x98?\x84\xd0=\xa2\x8b\x06\xdc?\x12?\t\x15\x94\xe4\xe1\xbf\xb1)R\x83#\xc1\xc4\xbf\xbdZ/\x88Ge\xea?%\x107R\xbcP\xd2?\x1a\x9bD\x98g\x88\xd7\xbf\xeb\x13\xa79\x81\xfe\xe0\xbf\xb4\x8c\xad3"m\xc3?`\x8e\xd3\x92\xc4\x96\xc2\xbf\x06\xe62\x01\xdf\xff\xd6\xbf-!\xc4\xbf\xa8Z\xd6?k\x83\x84\xe1\x19\x16\xee\xbf~\xe4\xa3\xcb\xe1\xe9\xe5\xbf\xf5a\x01{@\xe3\xe2\xbf\xe0\x12\xad\xae5m\xbb\xbf\x00\xd29\x16$\xfd\xe1\xbfe\xd1\xa5\xea\xa9o\xd9\xbfxL\x1c\x173\xd0\xe2\xbf\xca{d8\x12O\xec\xbf\xc2L\x89B8\x99\xb7?\x98\x86D\xbd\xe7)\xed?\x968\x98\xdcB\xa6\xdb>2\t\x999\xa4/\xee\xbf#\xaam\xe3\xb4\xa7\xe2\xbf\xc5\x0cN\xb9\x81\x9c\xd2\xbf\xf3\x92\xdc\xd1\x84]\xe0\xbf\x97\xfe_\xbe\xe0\x89\xd4\xbf7\x8ep\x86\x9c\x93\xe6?\xf2ios\xdd\x0c\xe0\xbf?\xa5_$Jw\xe9\xbf\x8fC\xa5,\xa4\n\xc2\xbf\xca\x16/)L\x15\xe3?i*\xca\x95\xdd\xc5\xde\xbf\xdc\tmor8\xaf\xbfM\x8a\x02\xb7\x07\x96\xe7\xbfv\xddl\xafm\xd6\xec\xbf\xbfS\x04\x90\xa10\xee?\xa7dO\x7f\xe7\xd8\xe6\xbf+\xd2\xc4\x18\x8ak\xf3?[\x04U^R\x99\xec\xbf(}h\x15\xcc\x80\xfe?-\x9d\xfe<\x88\x17\xd7\xbf\x8e\x87\x16\x93?\x0b\xd0\xbfM\x94\xc5X\xb7\xd8\xe2\xbf\x05\xfd\xeb*&\xe0\xe7\xbffN\x15\xfd\xf7:\xcc\xbf\x1c\xa2\xfc\xb2\x90\r\xb2\xbfv\x0fC\x14\xfb\xd2\xb1?y\x86\xcfO\x81\xe5\xe3\xbfa\xfd\xea\xa2\x84\xd2\xd2\xbfB\x1d\xe9\x88\xa5\xac\xc3?\xc4H\x17\xd1\x1d\x95\xc3?\x06\xd3\n8h\xb8\xc0?=\xe8\xab<\x12\x8b\xe8\xbf$c\xadZ\x01p\xec?\xf7\x18\xbc\x82\xa4m\xba?|jc\x82Z\xc8\xec\xbf\x8c\\\xad/\xba\x8a\xd9\xbf\xe4v\x0c\xd8\x98!\xd7\xbf\xf6\x87\x1e\x1b$\xc4\xca\xbf\xdf\xdd\xbb9\xb5gs\xbf{\x1d=\xc9\xe8\xc9\xdf\xbf\xbf\xba\xd0$$S\xf0?\x07+u\x06\xda\xe6\xe6\xbfA,.\xa2\x97\xb0\xbe?i\xcd\xdfjs=\xf3?\x96d\xb9M\xdb\xba\xc5?\xeb\x1a\x1d\x1d/\xf3\xa2\xbfze\x1e\xf3\x9f\xca\x83?\xf0\xf1\x87\xa8]\xed\xe1\xbf\x1cr!M\xc5\xdb\xc4\xbf\x0f\xab\xe2\x94i\\\xa9\xbff!\xbc\xbc[;\xd7\xbfk\xff%5\xd5\xa5\xdb\xbfh\xa7\x05\x87O&\xe0\xbf@\x0fm\x91n\xc0\xdf\xbf&f\xbc|\x1d\xa7\xeb\xbf\x83]\xb0\x9c\x05\xd9\xd5\xbfm9\x14\xf7\xf4X\xe0?\xa9lW)\xcb\x14\xe6\xbf\x86\x85\xbeK\x887\xeb?P\xbd \x94\x8b\x96\xe0\xbf\xcc\xfc5\xc3\xef9\xd3?\x9er\xb3\xce\xf4\xa4\xc5?m\xd9j\xad\x8c\xc4\x97?\xb7\x9d\xbe?\xa1k\xe7?\xcb\xab\x86\xda\xc2\xec\xc8\xbf\xdb\xdb\x9eB\xa09\xdb\xbf}\xa5lKP\x12\xe4\xbf;\x02y\xaaT\xd3\x92?\xce>\x87\xabY\x89\xc6?\x1daf\xff\xa0\x82\xf0?\xfcpB\x9d\xee\x8c\xc6\xbf\xd6\xa3\x87\x8aTS\xb2?\xc5KZ`*(\xe3\xbf\x9c\xc9v\xbdH\xe8\xe4\xbf\xfeQ\x8c\xc6m\n\xd8\xbf?\xd5\x1f\xce\xcb0\xd6?"\xdb\xbba\xf1\x94\xbe?\xc6\xcdj5:\n\xc3?%\xa9\xd6\x9e\xb2\x16\xd9?\xa6h\xa8K\x00\x03\xcf?\xec\xe6\xb7\'\xaa_\xd1\xbf\xc6M;\xb4\xd5[\xc4\xbfL\xfa\xea\x15@O\xcf\xbf\t\xe6\xdf\x8ap&\xea\xbf\xdaXk\xc8J\xf0\xf7?u(\xa7\xb4\xde(\xef?\x06\xeb\xa4\xd0\xcd\x82\xdb\xbf\xcc\xbeC\x15\x83\\\xe1\xbfJ\xa8\x18Q\xea1\xe0\xbf.\x81\xbb\x03x\x8f\xef\xbf\x94\x06H\xbe\xe9\xa7\xd8?@lf\xdcO\xbe\xe4\xbf\xa3\xf4\xf1\xe9\xbfV\xe3\xbf= \xc6^%\x12\xcc?3V\x0bD\xb8\xa2\xe0\xbf&e\x1e\xa0]f\xe1?\xa7gn\xa3\xdd$\xed?\xc9\xb7\xae\x0c.\xe2\xe4?\x8d@\x03\xaa8\xe2\xb5\xbfS\xe1\xfe\x8d\x15\x15\xc5\xbf\xc1\xb5\xebDSe\xd3?KH\x89\x8c\xe5\x05\xd9\xbf[\xb6\xce\x16\xf3\x02\xe4?\xdb\x83\x97\xd6\x16\x93\xe5\xbf$G\xab\x96~\xc1\xe2?9\xbd\xbb\x8a\x91v\x89\xbf\xe7\x11\x9b\x9b\x9a\xc9\xd8?\x7f\xab\xc9\x900\xf0\xda?s9L\x81\xcf\xa9\xda\xbf\xf0\x93\x93\xdd\xdc\xa2\xdf?\xe1\xe7m\x04\xac\xaf\xe1\xbfh\x9e\x9c\x8an\xd8\xd8\xbfK\xb0\xe2\xead!\xd6\xbf\x0b\xf3\xd7:\x15\x15\xde\xbfH\xa4g\x8e\xd2\x03\xe5\xbfF2o\x9a\xc1)\xb9\xbfE\xea\xc9<\x12\xc5\xdf\xbf\x88S\xee\xcd\xd6\t\xd0?\xc5!8c(\x99\xcf\xbf\xd3mh\x1f\xe6\x0e\xd9\xbf\x10\xb8\x17\x15[[\x8d?\x99At\xa1By\xd1\xbf5\xbc\x16\xb0\xfc4\xeb?\xd5\xc0\x92\x1atp\xa1\xbf\xe0\xbc\xaa\x15\xfcR\xda\xbf\xda\x87\xcf\xc3\x08\xf4\xf1?k\xa5\xc6\xfe\x03V\xdf\xbfI\x8e`\xc4\x03\x94\xe8\xbf\x95\x95]G5\xc3\xd2\xbf\x9e=+\x06-\x0c\xe4\xbf\x0cUS\x1b\x1a\x95\xde?\xbeM\x1f\xd2\xb7:\x87\xbf\xba\xb2q\xa9\xf4\x10\xe5\xbf\x96\xc4\xa7\xc0\xc2\x91\xad?\x00\x00\x00\x00\x00\x00\xf8\xff\xf2\x11>t\xd5\x96\xc1\xbf\xe2K\xfb\xa4\x00\xe7\xaa\xbf\x99\x19=\xb4)\xcf\xcb\xbfb&\xc1\xfe\xb6\xbd\xf1?\xb3=Ju1*\xd4\xbfbA\xff\xb7M*\xdb\xbf\x99<\xd8\x90|\xa1\xd0?30\xb8]\xbbC\xe2?\xe8\xe6\x9d@A\xd3\xe1\xbfA\xafX\x0elQ\xf1?\x81\n\x88\x9a\xf1{\xf6?T\x82\xff\xd9\xfdX\xc0?\xeb\xaf\xe1}\xeb\x83\xe1\xbf\xabO\xcb\xef\xf8\xba\xb2\xbfw\xc5?y\xa9\xfc\xce\xbf\xc0\xf0&.\xfd\xc6\xbd?\x8ezA\xf2\xbfZ\xcc\xbfm\x95\x95\x99\xa15\xe1\xbf\x8a\xb1\x0f\x8bwa\xe1?\xca\xf4}\xe4\xac_\xc2?\xa1\xb5_\x18D\xfd\x00@\xd8\x9d\x8e\nt\xa9\xc9\xbf\xbd\xbb\x02\x7f4\x9f\xd2?\xc4\x0b\xcd-wy\xd2\xbf \x17;\x8ax\xee\xdd\xbfZ?`o\xda\xc0\xc2\xbf\xa5\xe3\x83\x81"\xa2\xc1?o\xc6\x99\xb8Q\x8b\xd6?z\x10\xb7f\x97,\xeb\xbf\x91#\x99\xb7\x97*\x9f?\xf9\x1d\x90\xa0a\xc6\xdc\xbf\xae\xfc1\'\xfa\xeb\xc2\xbf\x9c\xcb\x97U\x10\xc6\xe3\xbf\xd0\xe3\xbc"XB\xec\xbf\x17\xf5\x00J69\xd0\xbf#\xfc\xe3eg\xdd\xe3\xbfw7.\xe7\x82\x83\xe1?\xff\xd9\xe4$\xa8\xb2\xe7\xbf\x9e\x19\xc6\xc6\xd3\xe3\xdf\xbf\xde*\x86Z\tB\xbe\xbfi4iU\xeb\xd0c\xbfH\xa8T\xe0\xe2\xac\xf0?N6\x9a\n\xb8n\xdd\xbf=\x14\x8a\x02\xa8\x05\xc6\xbf\xa8\nVkm\x05\xee\xbf\xdc\xb8Oxs\xf5\xc5\xbff\xf2\x04O\xd0\xdd\xb8\xbfx\x95\x9fU\xe7\xb5\xbe\xbfM\xa6\xb9\xdd\xb8\xe4\xa6\xbf1\x8b\xe6p\xb5\xd8\xc1?Q\xa4{;\x7f\xaa\xea?\xf3\x8f\x0b\xd2\x1ci\xe4?\xce \xc7\xa2\x07\x99\xe3?Q\xf1M\xf7 \xff\xeb?]O\xff\xad\xbe\x84\xdd\xbfB\x93N\xf0\x02\xaf\xc5\xbf\xdd\x80p\xa8\xe9\x86\xeb?\xdb\xee\x8dA\x99\x8c\xe7\xbf?`\xe4\\\x06\xcc\xec?\x01\xed\xb3\xc0\xf4%\xe5\xbf\x9dL\\\xb5-q\xcd?rK1\xd3 \x19\x00@2]\x81\xb2\x90\x8a\xb4\xbf\xbbM\np\xd2E\xe1?\xc4\xe5\xdf\xaa\xb5\xd0\xed?\x17\xd3\xb9\xb2E\xd9\xd0?\x07\xaa\xd0D`W\xb6\xbfB9fXq\xd1\xd1?%_/\x88\xe5\x13\xa0\xbf\x9c\xdb\xf5\xf3\x95\xe5\xc5\xbf\x02\xa7\xf5\xd1\xbb\x1d\xdc\xbf\x8107\xa0\xde}\xe8?u\x03\x80\xa4\xb5\x92\xf0?#\xb1U\x8a\xee\x08\xe7\xbf\xc3q\xb6`?\xb0\xe9\xbf\x8dJ\xa5\x94\xb8\x0c\xde\xbfD`"\x1ar\xe1\xdc?\xf0\xf4\xc2\x91\x9eO\xc0?\xca\xa8\x0cp\xe5\xe1\xc3\xbf\xc3"\xec\x9e\xba(\xe6?\x06+\x1e\xb16\xe0\xb3?i_\n\xcf,S\xe7\xbfon\xaa[\x90b\xc5?\xcar\xcb\xd3\x86\x8a\xce?\xf9)\xb2\xd9\x83-\xc4\xbf\x13\xba\xb8ST\xb7\xfc?=\x06\xa6\xf3\n#\xe6\xbf\x961\xc0e\xd4\x92\xdf\xbfO\xc2\xf1&\xf2\xa9\xc3?\xb2\x92B\xea\xfa\xbe\xc8\xbf\xf5p\xb9\xf92 \xe2\xbf\x1b\x0f\xe2\r\x81\x15\xca\xbf\rG\\\x8f\xd33\xf4?x\x83\xf4\x02Q"\xdc?(\xb9\xc8\xd0\xa5\xec\xc6\xbf\x8a\n`\xd5]_\xe4\xbfmx\xb4\xe4j6\xda?\xe0l\xc9%o\x1e\xe0\xbf(\xe25\xb0\x11\xaf\xd5?\x8a\xfc\x98"\x9f\xe2\xe9\xbfXa\x9e\x03\xe9\xf8\xd5\xbf\xce\xdb\xaei\x00\xfb\xd8\xbfQ\xe6m\xed\x18\xd4\xeb?;\xd2\xaf9y\x83\xbd?<d\x1aq\xcd\xbc\xe5\xbf\xa4\xef\xa94{\xa8\xb3?\xde\x0c\x01p\x96\xd2\xda\xbf\x13\\/\xa8\xf8k\xc7\xbf/\x9a\xfd"\xa0!\x01@Z\x17~0\x12\xbd\xd3\xbf\xf0\xa9\x15\xaf\xa7\xc6\xd7?\xf7\xc5\x9c\x17[#\xc7\xbf_Uir6\xca\xd7\xbf?\x9c\x89g\xb7v\xe8\xbf\xee\x08\x84\xc1y[\xcf\xbf\xca\x91\xb1!H\xf5\xd5?\xc2\x11\x1a\xf0\xb1\x91\xc2\xbf.\xc4\xe3\xdc\x17&\xe4?#\x9b#\xbd\xcd\x95\xd6?\xedav\xd0\xd3\xd8\xc1\xbf\x89\x05\xc0a\xe64\xc0??\xe6\xf0\xc0\xe7\x0c\xab\xbf^\xd9\xfb\xf8n\xad\xcd\xbf]4\xac7h\x1a\xe0\xbf\x99\xd6\xfeyg\x0b\xcd?y]\xa5e\xe0,\xd1\xbfd!\xae6p\xbc\xa4?\x7fS \x0e\x87T\xdc\xbf\x1d\x19a4,y\xbf\xbf\xb4\x95\xe3\xe6\x80I\xcd\xbf,\x1a\xafSen\xe5?R\x97\xf6\xf2K\x03\xcf\xbf\x1a\x17\x90\xb7\xd3\xb8\xe4\xbf\xea\xbd\xa6qa\xfd\xd1\xbf\x07\x9a\xcfQ\xc5\x88\xe6\xbfj\x18\xc7\x02\xabg\x93\xbf5\xbc}\xc4\xea\xc3\xd4?\x17*\x179\x97\xda\xda?\'OR#\x02\x9f\xdb?}7e\x1bT\xa4\xc9\xbf\x9d\r\x83\x97\x98\x1e\xe4\xbf\xeb\xf9\x7f\xa6\x19{\xc3\xbf\x05EfU}\x03\xdf\xbf\xe6\xe9\xdc\xc2\x00\x99\xe6\xbf3$\xef\n\x022\xe5?\x18%\xbd\x93K\xf5\xdd\xbf\xf4\xb7\x18\x86\xc3k\xe1\xbf\x08\xeeB0[\xdd\xd7?\x95\xba,\x00\x9b\xc4\xa2\xbf{\x9a\xc3\xb27\xa3\x9b\xbf\x97\xca\xf7\xc0C\x19\xc7\xbf\xd9[6"bo\xce?l"Q\x97\xe9\xae\xe1?\xefQw\xcd}T\xe8?\x7f\x88ZY\x99\xe9\xd2\xbfq<\xeb\xfbG@\xe4\xbfg\x9c\x1f\x84TD\xe5\xbf1\x9b\xf7Kkm\xca?`\xef(\xd5\xc2\xb7\xc1\xbf\x8b\xd77x\xf2H\xf9?{\xc6\x94\xcd\xc39\xa2?\x86(\xa6\xe9.\x9f\xd8\xbf\xd5\xff\x0e0x\x0e\xc4\xbf4\xfc\xf3A\x1f\x1d\xc3?B\xba\xfcN\xa4\x85\xd4\xbf"\xf9x\xb9\n\x1a\xd2\xbf\x9f\x82\x80\x00`\xc4\xe4?\xc8\xa3\xc3\x08kc\xbc?\xe0\xd5F"zX\xbd\xbf{\xac\x95b\xf3]\xd4\xbf\xedY\x0c<\xe92\xd7?\x94\x97\x8dK\xdfi\xd8\xbf\x9b\xba\x80\xac_#\xbb\xbf\xce\xcc\xa2\x89\xbc\x1e\xe8?\xdc\xc0\xaf\x17\x1c\xee\xeb\xbfD\x00+\xa4\x88\x13\xdf\xbf\x14c\xdd\x16fp\xd4?\x8f\xc7>+sV\xe9?\x1b\xda\xcd\xc7B\xd2\xc7?\xa8\xb1\xa9L\x8cX\xc4\xbf \x13\x9c\xb1\x8c\xc0\x9f?}i\xebs\x0bC\xe0\xbfl"Q+\x82\xc0\xd8\xbf\xc4k\xf4P4\x0e\xef?p\xa1\x9e\xa8\x9e-\xd4\xbf\x10\xc9\xd1\xdap\xbe\xd2?\xa5\xd2\xb8\x9fAC\xf0?w\xcf|\x82W\x1c\xe5\xbf\x96\x0c\xfb\x14\x8b\x06\xd3\xbfV\x07\xc6V\x9f\xf4\xd1?5\x15\xe0\x9b7\x8f\xf2?b\xe8c\xaa{G\xb5?\xdf\x1a\x1f\xa3)\x04\xe2?\xd2bG\x99)\x8f\xec?\x17\xe0`\xce\xd7\x9d\xa1\xbf\xcf4vl\x1c>\xd2?g\x1eMH\xa6C\xe3?&\x1c\x1bh\x86X\xda\xbfS"\xc3\xe8\rU\xd3\xbfa\x13u\xe6\x88M\xf1?f\x9e\xf2|\xcf1\xb6\xbf-\x90\xf8\xc2M8\xc2\xbf\x80"\x0b=\xe3\x8d\xe9?=?E\xaa\xd0o\xc4?\xcd@\xdb3\xae\x9e\xe1\xbf\xb8\x95\x9c\xbc\x1e}\xb8?R\xc2\xbbaW\xbe\xe1\xbf\x982\x0f\xacT\xf3\xe0\xbf\xa9D\xf3H%\xc9\xdc?A\xac:@F\xa9\xc2\xbf\xb3)\xd7.!-\xb1?E\x0eN\x97<\x91|?\x13\xd2}\x9crj\xb1\xbf,\xf2o\x11\x1aQ\xe9?\xfd\x8f\x1e\xad\xcf\x83\xb1\xbf\xc2I\xebY.\x07\xd1\xbf,4u\xd29#\xc4\xbf\xe0\xec\xeaf\x19\xce\xd4\xbf\xfecK\xd7\x8d \xd6?\x9b\'\\Tp=\xea?\x1a\xa5\x1f\xcb\'%\xeb?9-y\xad\xde\xed\xd2?e\xcc\x8c^\xd7U\xc3\xbf\xa6E\xfa\x02W\xbd\xae?9H\x1bR\x10Q\xe3\xbf\x1ag\x04\xf4t\xe8\xe1\xbf\x99k\x8bb]5\xd2\xbf/\xe7\xa0\xf7\xb9:\xb3\xbf\xc7r\xa7\xdf*D\xe3\xbff@\xa9e!\x14\xdf?\r\x8f\xdc\x8b\xcf\x12\xa0\xbf0\xbf\x14Ew\xa3\xc6\xbf\xba\xb8\x02v\x81;\xd0\xbf\x8a\x0e\xeb\xbdIy\xda\xbf\xf6\xa3\x17\x14]\xef\x9c\xbf\xd7\xe2\x97:\xe4\x0b\xb1\xbf\x8b\xc3\xab\x88,\xe7\xba?\xa90\x88\xc5dq\xc3?7\x0b(\x82\\u\xc6\xbfr\xc2XK<\x8b\xe6\xbfX\xcax\xbc>\xd0\xe3\xbfP\x1d%\xdf\x15n\xb0?\xc2J\x82q)N\xdc?\x89\x07\x17{Z\x9e\xdb?\x98\xce\x08P\xb2\xd0\xd9?\xc7%\xe4@\xbe\xe5\xe7\xbf\xf87k\x9b\x0c\xc7\xd5?\x9e\xbf!\x02M0\xd3?\xa8\xd4Fb<\xd4\xd1?\xff\xc6\\\xf6\t\x07\xdb?n\x92\x81\x96q\t\x85\xbfc\x87\x1f\xe1\x805\xe8\xbf\xed%\x1f\xad~=\xe7\xbf=\xe24\x85\xa9\'\xc6\xbfc\xdb2\xa0b\xa2\xed?[\xc0.I1`\xe0?\xfe\xc1:U>P\xcc?O\xcf\x8f\xad\xe7(\xc8?<\x8f XIo\xc7?u3_\xe9\xd7o\xe1\xbf\xbd\xfb\x07%g\xe4\xd7?\t=\xb4\xfaRU\xe6?\xc8!Y\xa1\x9e\xa9\xf6?)\xc06\xca\x0fe\x02@\x07Nc\xde\xd6j\xfd?\x80\xcf\xbb\x86\xc0~\xce?\'\x1b\x9e\xa7|i\xda?\xf0\x14w\xe0\'\x9b\xe2?\xab\x07\x96\xad\xc3\x89\xea?\xcc1Dm2G\xdb?\x106B\xf3_\xa7\xdd\xbf\xb5\x00\x83\x83n\'\xe9?3\xfb\x8a\xb3wF\xe0\xbf\xa0\xf9\xed\xc5]\x04\xd1?\x0b\xec\xa4\x89\xe6\x8d\xd6?C\xf8\x9c\\\xb5z\xcf\xbf\xb3M\xc3\xc5\xc7u\xf4?\x06\x8b\x1a\xc8\x8eZ\xe4?J\xdc\xc69i\x10\xc1\xbf\xb5\xbf3;\xa2V\xb1\xbf\x0f\xa3\xcd\xfe3\xcb\xe2?\xd0hT\xb3*\xc1\xc9?>f\xd4%]\x95\xbb?K\xc1\x0f\xb9\x9f\\\xde\xbfTf>\x0f!x\xe2\xbfS\xd4\xa2\xd53\xd9\xe2\xbf\xc5&\x18\xe9CJ\xce\xbf\xf2\x1c\xf1\xed\xfc\xa3\xc2\xbf0\xe8\xb1\xcb9\x94\xcd?\xb2\xa1S\xab\xb8R\xe1\xbf\x84s\xea\x14\xa3\x83\xa8\xbf\x11\x1b\x05K\x03\x9e\x00@~\x89&t\x92\x19\xd6?\x92\xcf\xea:^\xdc\x85\xbf\r3\xde\x9f\xfa\x1d\xe4\xbf\x90\xe33\xb9h\x04\xfd?\xc7\x9e\xdd\xb2\xf8\x93\xc5?\x1d(\xcb+\x1b\x1e\xe2\xbf\x0fe\xd1\x8fN\xc0\xe5?d\xee#w\xe3s\xdb\xbf\xa2C\x8e.\xcc\x8e\xaa\xbfr\x8b\t\x87\x82D\xec?\xd5\xef\'\x9d\xf6R\xd3\xbf\xa7\xe0\xff\x7f\x9f|\xef?\x05#\xf0\x8c\x1aM\xd1\xbf\xcb@4\xda\xd1\x8e\xb2\xbfWmu\x99q\xe6\xd0\xbf\x00\x00\x00\x00\x00\x00\xf8\xff\xf1\xd2\xa4ar\x14\xab?\xc2\xdfG\xfe-"\xc4?\xa3\x14L;s\xe2\xe9?\xe1X\xcf\xb9(c\xb4\xbf\xd2\x8f\xf7$\x1f\xe0\xeb?\xdd\xa3\'S\xdcC\xf3?\xcc\xb7\xe1\x81\xd2P\xe0\xbf\x82\xea+$\x0b\x0e\xcf\xbfq\xf4\xecb\x1a\xfd\xdf\xbf\x1b\xe7\xae\x92W\x97\x93?\xc4$d\xdd\xce\xa4\xdf\xbf\x89\xbaW\xdc\x94\x96\xd1\xbf\xfb\xa6\xee\xf4\xa9\xab\xe2?\xc2\x19\xa6\xa1\xeb\x83\xce?1\xdc\x8dw\xd0"\xcb?\xa4\xf3\x89\xd1\xd3\xc3\xf3?$\xa8s\x98\xfc\xbf\xe7?\x05*\xa6\xb0\x96\xc1\xd3\xbf\xd4\xafm\xd5v7\xea?m\xca\x8c\xb3\xe0\xbc\xe1\xbf\xa0r\xfai\xeb\x1e\xc9?]\x82\xd3\x1a\xcd\xfd\xd4\xbf\xa3\xffB\xa1SB\xdc?\t\xea\xb2\xce?\x91\xb6\xbf\xdfU\x0f\xe6:\xba\xf4?\x16\x91\xec\xa4:\x9c\xdf\xbf\xb6kF\x0e\x80<\xcd?$\xc8g\xcf\xa2\xd0\xa2?Fh\xcaH\x08\x0b\xe0\xbf"4\xaafp\xe1\xf1?}\xfd!rQ\xad\xd5\xbf\\a\xc9\x12\xbb\xa7\xb5\xbf\xc6M\xa0R\xf9m\xa2\xbfkmQ\xc9\x16\x84\xcd\xbf\xe2\xad\x18\xf4\xc9,\xcf?hq\xcb\x864}\xbe\xbf\x0bd)17\x8e\xa2\xbf~\xa5\xd88\x9e8\xef\xbf\xed\xd9#s\x7f\x9e\xe0\xbfA\x13\xfd\x8cI\x8b\xbf\xbf\xd2\x96\r=\x00\x05\xe4\xbf<\xc8\xed@o\xe4\xec?\x10\xc2nfL@\xc9\xbfO\x17\xd0P\xba\x1b\xf8?\xc9aH\xc4\x00\xf5\xdf\xbf\xfe;e\xfcKH\xa0\xbf1k\xc9zM\xba\xe3\xbfn\x01\x8c\xa7:-\xb9\xbf\xc5\xcd\xb3}&f\xe2\xbf6\x15,Z\x9c\xd8\x94?\xe6\xd89\xe0\xb2\x07\xdc?W\xf70i\xbc\x94\xe6?\xf6\xec\xfe\x03\x9ch\xc3\xbf\xb9\n\n\xe4\x9bD\xe7\xbfe\x9d5\xa2^r\xac?\xdf\xd8\x13=\xe9\xf5\xa3\xbfI\xf7\xb3/-I\xcd\xbf\x10\xbe\xf8\xd63\xf5\xed?.\xed\xea\x04Gl\xc3\xbfG\xffV}\xed\xdc\xe0\xbf}\xb5\xb0\xc4N9\xc6\xbf\xe5\xf1"Orv\x02@\xd3\xee\xf5`\x01\x9d\xe1\xbfN\xd3/\xf6\xf7\xbb\xfd?\xab\x17\x87r\xd7P\xe3\xbf\xb4\xe1\x1at\xa4\xc1\xea\xbf\xb2To\xdb\xc3\x02\xe3?~\xc2\t6vY\xf1?\xab\x1f\xd3\x16\x9ct\xdb?\x86\xfau\xa1F\xa5\xe5\xbf\x98\xc8S\xb5\xbe\x17\xe0\xbf\x99\xae *\x96\xea\xde\xbf\xa7\xd9|v\x1dR\xef?mw\x11\x95{8\xb5\xbf}\xdc\xe1\xa0W\xb0\xd9?Xluq\xee$\xe0\xbf\xbeJ)+xz\x86?\x07\xba \x99\x07\x12\xde\xbf\xfd~C\x00\x13\x94\x93?S\x85\x18\xb7\xed\x18\xe3\xbfU[\x93oD\x8c\xd1?Zr\xf6\xefr`\xe9?\xb77\xf6\x1fLi\xc5?\xe0,\x1dA\xcc\x92\xf8?\x9eA\x19\xf1\xea\xaf\xe6\xbfF\xee\xd1\x18\xdb\xf2\xf3?\xce\xda\xd5o\x9a\xb0\xd7\xbf\xb1\x93\xa7\xb1\x10\x84\xd5?I\x834z|\xb7\xf7?\xa8\xbdQ\x08\xc1r\xca\xbf\xf5\xc8\xda\x87jG\xc1\xbf\xf3\xdc\xf0;\x83\xab\xe2\xbfi\x16\xb5\xb0\xbd\xf9\xd4\xbf\xe8\x87\xf1\xdb\x90+\xe8?\x992\xef\xacq\x14\xc0\xbf\x9b\xdf\xcb)8X\xd8?\xe3A\x1a\xba\x92\x1b\x7f?\xe7\x11\x83\xda^\xc5\xf9?\xb0\xec\xb5\xfb}d\xec?S\x10\x1fk\x81Y\xb2\xbf[e\x05}j_\xdd\xbf\r@\xc0x5\x03\xe0?\x85\xb2\x8d\xa9Y\xd0\xc6?\x9a\xf0\x0c\x87\xca\xcd\xec\xbf\xfe\xff?\xa2\nI\xdc?\x95\xca\xcc\xb7\xb25\xd4\xbf\xb9\x99\x8eU?\xd5\xc4?\x07\xb0\xbb\xe6\xa3n\xbe?\xdf\x8cj\x81\xf7\xc9\xe2\xbf\x07\xcem0R\\\xcc?=\r\x1c)`}\xe4\xbf\x1e\x8ap\ty\x1f\xc6\xbf\xc5\xbc\x87`\xb7\t\xd7\xbfUu\x98\xe6\xf8\xc3\xba\xbf\xff\xdd\x935\x9c\xd7\xd5\xbf\xe0\xc1\xc9<\xd8\xbc\x92?p\xaf\rU\x165\x99?\x04p\x17\x15\xa1\x9a\xc4\xbf\x11\xd9S:\x83\x82\xd4?\xc0\xae\xd2G\x1fh\xc0\xbf\x12\xb5W\xf3\xba\x80\xe4\xbfL;\x80\x83T\x99\xd3\xbf#F\xdd\xed\xda0\xcc\xbf\x8f\x98z\xddO\r\xee\xbf\x95\xc4\x0eP\xf6m\xd4?\xb5\xaa\xf9\xa0\xcb\xe7\xbe\xbfH\x12\xc9\x14>\xcc\xc6?\x0f\xc2\xe9$;\x81\xea?^\xa2\xbc\x95\xd61\xa0\xbf\x83\x1f\xf4\xbb\xaf\xb6\xcd?\x89\xd1S\xb1!"\xd2?O\xacK\x8c1\xe8\xde\xbf\x19\x81\x89\xdd{s\xd5?D\x04\x94\nx\xd4\xdd?\x9f\x92\xef\xd8Q5\xc5\xbf\x18 r\xae\x83\x15\xe1?\xe6\xec\x91\xd6\x08\x07\xbb\xbf\x19\xe6\x91V)n\xe7?\xdc\x10\n\x8e\x1d\xc8\xee?\xe6R\xe7g\xa1\xae\xd3\xbfg\x98\xd0\r\xcfs\xaf\xbf\xd9\xa2\x16\x08\xe0\xeb\xc6?\xb4\xbap\xa3\xaaK\xde\xbf\xc23W$\x15\xba\x9e\xbf\x18,\x00\x08M\t\xa2?ZU%\xd6\xd9/\xc2?6\n\x1e,\xbcD\\?\xda\xbb\xc7m\x80\x11\xb6?Jc\xdf\xc7\x96\xf4\xc8?\xb73U\x166\xa0\xbb\xbfC\xe8\xe29\xd6\xa9\xd6\xbf+\nG\x10\xc0\xfc\xd3\xbfv\x1f8\xe4+\x92\xe6\xbf\x13\xecd\x81\x17\xbd\xde\xbfWy\xf5#\x90\xe9\xdb?)\xcd\xf3\xf0\xfeY\xa3\xbf\x08\xd6\x97\x1eQ\xd8\xdf?4\n(\x19??\xed\xbf\xaa,\xb0\x83\xe3\xe4\xd9\xbf\xa7\x15\xa6\x0c<\\\xc0?\xab|\x83Q\x13B\xcf?\x1ed\xff`\x87\x0b\xe3\xbf?\xa5\xce\xd9p\xed\x9e?\xb0\x102\xd6\x16\xf3\xe2\xbf\xf2vW\xfe\x92\x11\xf5?X\xc1\x85<!\xbd\xf2?>\x98_x\xc4\xce\xcf\xbf\xf4^\x03K\xa2\xd2\xb0?P\xccx\xb0\x16\xe6\x9f?\xdb\x9c\xe6\x83\x0b\x04\xc8?\xe1%xZe9\xf6?\xadg\xb5Z\x16{\xc2?\x8aQ\x9f\xfa\xbee\xd4\xbf\x8bc\x8cCZ\xbb\xd9?\xac\x03}\xed\xe1u\xd7\xbf\xac\xe3~\xeb\x1d\xc0\xdb?\xb2\xdc\xadT\x02!\xa1?\x0fw\x83\x0f/\x1c\xe5?\x9fe"\x03\x15z\xd6?\x9c\xa1\xe2\xbf.k\xe0\xbf\x8c*\xcf\xe2N\x10\xe1\xbf\xc5\n\x1e\xab\x0f\xdc\xdd\xbf\x94r\xeb\xab!\xb0\x8a\xbf\x84\xa9l\xb2\x90\x92\xe2\xbf5e\x81\xb5\xfa\xc9\xd7\xbfF\xcb\x82\xad\xe1\xd7\xe5\xbf\x85h\xaeg\x08\x94\xde\xbf\x07\x14"`\xcd\xa5\xd3?\x9c\xa2\xa0\xfc\x9e\xa4\xd9?\x05\xb0\xc0\x8d\xe0d\xe2?$\xd7H\x81\xd8\xe0\xcf\xbf\x8e\x00\xb6\x7fa\x83\xe4?#T/\x0b\xb9\xd9\x9d\xbf9\xf59\x1e\xf9\x1c\xb5?%\xd2\xb0V\x0c\xef\xe8?\x9fY\x1e\x04\xce\xdf\xc0\xbf\xea\xab\xf4\xf3\xb0"\xde\xbf\x8fA\xa8\xca\xf8\xa9\xb0\xbf\x12\xf0\xc0kP\xb5\xe3\xbf\xe6\xdaz%42\xe0?\x8f\xac\xe4]?\n\xf6?\x15\xeae26\xfe\xd9\xbfv\x15F\xbd\x90\xc7\xd1\xbf\x00\x00\x00\x00\x00\x00\xf8\xffa!\xb31\xcb\x84U?Cps1\x06H\xa8?\x1c\x1a2\x1aMc\xc9\xbf\xbe\x08r\x14\n\x0e\xd3\xbfl\xd1\x04\x8a\xe2\x85\xd1\xbfr\xf4\x81`h\x9c\xe8\xbf]\xb2c\xed\xa8\x1e`?\x90\t\xae\x00\xc1#\xd7?\x16\x13-F\xbc!\xcf?tb\x00\x13\xd8l\xdc?d\xe7v\xed\x9e\xb1\xf4?\xb6\xf5\x07\x87\xa2[\xcb\xbf\x8b(\x91;\x9e\\\xe2\xbfQ\xa1\xb9P\x0c5\xd8?\x11e\xcc@@\xfe\x92\xbf\x8c\xcd\xcbZ\x13|\xd4\xbf\x062\xa4\xeb\xfaX\xd5\xbf\xf8:Rg\xf2\xab\xb8\xbf\x10T\x96)E\x9f\xfe?\x8bT \xfa\xb1_\xdd?b\xcfs{\xe0\xd1\xf0?)pQsv\xbf\xcf?K\xe5R8\x04\x13\xcb\xbf\xb5\x9f\xe0\xcf\xee\xc3\xd7\xbfXc4\xce\xfe\'\xe5\xbf?\x02\xac\x10D\xfe\xa0?\xf0]\xbb\xe9\x84\x17\xce?0\xd1\xc8\xb9\xb7\xa5\xb6?\x00\xde\x94o\x01\x07\xeb\xbf_2\xba\xb2\x12\xc9\xdc\xbf\xbf\xc5~\x9f\xa5\x19\xe4\xbf\xdc\xb8(\x90l\xdc\xbf?\x85f\xe0\x1a\xad\x16\xe4\xbf\xedeA2\xe3~}\xbfY\x08fU\x9a\x0b\xd9\xbf\xe4l\x8f\xb0\xabs\xeb\xbf\x0c\x0ce\x93i\xb9\xc2?\xb6\x94\xb8\x0e1\xf0\xe8\xbf\xe3\xdc\xf8)`\xf4\xe4\xbf\xe1(\xde\x87|\xf0R?\x97~Ut|S\xe1\xbfKaC,\xd5/\xf1?\xd6\x96\xa2\x9c\x9fB\xd7\xbf\x0c\xb3\xec\x18\xecs\xd0\xbf)L72\x8c]u\xbff"\xaf\xfcPg\xdc\xbfYN1\x90F\x1e\xc9\xbf%\xb5\xc2\x0f\xe5\xd6\xde?7\x0b`N\xee1\xd5\xbf\x8fPXX\xf0\xa9\x80\xbfM\xa87Q"\'\xcc?\xd8\xa4\x0b\xcb8m\xd1?\x87\xd2\xcar\x87\xb6\xe0\xbf\xb7\x14\xdai\xfbB\xd8?P\xbeWYp\x98\xdc\xbf}\xc7Y\xf7q\'\xac?\xd1\xc3\\\xb3\xbfV\xf0?\x8f\xfa\xeb~\xd8\x86\xc6\xbf\xceI\xff-\x9f\x14\xf6?\x1a#\xe9z\xd5\x17\xe1\xbf\xeb\xfd:\x92\xf6h\xdb?1\x80\xa3\x06\xf7p\xe4?\xc7\x16\x11^$\xc5\xde\xbf`[\xd6\xe8\xa5-\xbe?r\x9ew\xde\xceB\xe4?Gd\xa0~#\xee\x9c\xbf\x8d\xeb\x1b+Z\xe0\xd5\xbf*\x1du\xc4f\x02\xd3\xbf\x85\xcc\xebOj9\xcc?\xd9\\j\xf8\x91\x13\xdd\xbf \xb8\xfddq\xd0\xcb\xbfs\'\x06\xdcQw\x89\xbfi\x94\xcbg\xd2y\xb3\xbf2\xfd\xef\xa8\x9b\xdc\xb3\xbf!\xf1\xdd\x8f?\xd0\xe4\xbf\x0eL9\xa7\xf6@\xf0?\xa4P\x91\x8e\x97Q\x8e\xbf\xf9\x82\x8c\x8d\xcaK\xe2?\xa0W\xde\xbc.\x06\xa3?\x00\xaa\x150\x01?\xd3?\xfa.H\xc9\x96`\xc7?\xc0\xf5\x9bK\xc0/\xbf\xbf\xc8\n\t\x1f\xe01\xb8?\xee\x1ci@vO\xc6?\xefWS\x99Z\xa2|?\x84\x9c3\x93\x9d\xc8\xc6?\xc5\x8c\xc7\x0bsu\xdf?D\x1dv\xb4\xc1=\xd0\xbf\x8a\xf0\xcb\x069!\xaa\xbf)}\xcb\xf4\xb5\x05\xea?T\xfb\x8b\xf3\xbf\xc4\xe4\xbf\x0c#\xc8\xba\xed`\xb5?\x92\x1f~$\xf1\x0b\xf3?tD\x9e\x03\xa5\xff\xe7?\x18\xaa\xba9\xbaL\xd8?\xb5+\xdan\x96Z\xe9\xbf\xb1\xbd\x9f#\x01Y\x00@Q\xa6W\\B\xdc\xcd\xbf\xfc@N \x0fV\xe0\xbf9\x07\'K\x95T\xd0?\x0eb:9xk\xd4\xbf\xdfO`\xba\x93\xb3\xca\xbf6\xa8]\x05\xb9\xd7\xc9?\xdd\xbaaY\x88\xdf\xd1\xbf\xf0\x1e\xc0#\xbc>\xac?6\xde\xa3\xda}\xae\xbe\xbf\xd6?\x02^{>\xd3\xbf5\x84\xc0RW\x15\xc9?:}\xb4"\xf5\x94\xdd\xbf\xbd\xcd9\xbc\x0f\xb0|\xbfC\xae\x90D}\x11\xe2?~\x96KA(\'\xca?\xa3\xb1Ul\x17N\xd2\xbfj\xcc^\xfdRb\xeb\xbf\xa4\x13\xd0\tc\x07\xd4\xbf\x99N\xc0\x89\xc8\xda\xc3?\x85\xce\x8a\xf1DP\xe2\xbf\x83\x92\xad6\xd9g\xdb?Z%5\x1fX\xe1\xba?\x8b\xb8g\xd5\xb7v\xcc\xbf\xcds\xfe\x12\xe3\xbd\xe0?\x90\xc7\xa2\xb2TR\xd7\xbf\xb2k{\xfd\x0c`\xe1\xbfv\xa7\xa3\x1e\xfa\xd5\xd9\xbf\x8b=\xf1\n\xff\xdd\x9c?\x10\xceB\x9as\xbb\xc7?8\xc1\x8d\xf1\xf5+\xc9\xbf\xfa\xbb$uW\x1b\xf4?\xcd\x12\x9c\xe9U\xde\xda?\x1f\xbd\xbd\xba\xf9\xfc\xe3\xbf>\xdc\x96\x1e\x9dz\xc3\xbf\xfcg(\x07\xb7i\xce?\xc1\xe6\x8d&\xb4;\xd7\xbf5x\x9a\xd19\xc3\xf5?\x86\xbf\xf2S\xebs\x97?<\x0c\xba\xf0\x01Q\xb4?\xa9\xc3/\xbc\xa10\xd0\xbf\x1b\xf5\xf1zH\x07\xc2\xbf\xb9\x98:00I\xc7?\x07\xd9\x9c\xa6Z\x9e\xc7\xbf\x1d\xc1\xa7\x8cg\xba\xe4\xbf\xde0\x02\xaa\xd4\x18\xa6?\x9e?\x95/\x81\xda\xdc\xbf&\xd45A\x17\x90\xe4\xbf|\x01TO|\xb4\xcd?,\x89Gw\x7f1\xe3?\xb5@\xd6`\x95Z\xe1\xbf9K\xbd\x18\xff\x1f\xb0\xbf\x19\x81}}\x88B\xa8\xbf\x884\x95[\xa9\x7f\xa1?w\xd7\xcd\xda\xf6\xe1\xa5?)\xf2\x1e\x86 \x94\xc1?`q)\x97\xa5"\xd6?\x97J\xaav\xec \xc3?3\xbfBK$\xcb\xdd\xbfNWOHC\x9c\xe4\xbf\xa9-\xf3\xad\xe7\xea\xd3\xbf/z\xab\xb2\x0c\xd6\xdb?\xeb\x90r\xd9Fw\xa7?_|b\xa4\x9f&\xe0?@"\x04\x95l5\xe6?u\xd6\x1f \xa7\xfb\xaf?\x9d\xde\x93\\C\x11\xc7?\xae\xf5\xcbe\xe8\xc2\xad\xbf\xdb-\xf4\xe1\xb0\x88\xe6\xbf\xa6\xda\xad\xf6\xed\xd1\xa8\xbf(\xe95\xdc\x12\x04\xd5\xbf\xb0\x96Sc\xe4\xb5\xd6\xbf_\x8c_\xc9\x81\x82\xba?\n\xb2\xab,\xcd\x95\xa4\xbf\x9e\xe4i\xb1!\xdd\xe0\xbf\xbc!\xe8\xa9$x\xe0\xbf\xc1\xfd\x02\xf2\x86\xce\xa9\xbf\xbfw\x0e\xd0\xaf\xb1\xf2?\xefK\xfdpni\xed\xbfhW\x9ab\xfeq\xdf?\x11\xbdZ\x92\x00\xc4\xc1\xbfE\x11\x16(Q\x8f\xa7?\xda\xbd\x1cV\xcd\xd9\xe5?\xed\xbf\x05t\xf3%\xd5?X\x92\x13\xccJG\xcc\xbf\x0e!\xdc\xc0Np\xc7?:\xe8z\x85\xc5\x9c\xd1\xbfN:8\xea\xc7\xbe\xf2?u\t\xa06\xe7\x8c\xe3\xbf\xc8v\xb5\xa1\xd0d\xd1?\xc7M\xf0z2\xec\xd0?\xfd\xcd\x1c\xcf\x99\xf1\xe4\xbfY\xb2N\xeb=\'\xf0?\x00\xb9i\xa4x\xbe\xc7?\x0fB\x1b\xd0\xe7k\xf1?\xc1(R-\xfe\xa7\xb3\xbf\x13\xdc\x8e\xb5\xff\xdb\x8c?C\x8c\x88\xb1\xc5\x00\xf0?=H\x05I\x85H\xc9?\xe5\x88\xa6\x87R\xbe\xf1?\t\x0e\xd2\xb4\xde\x10\xb4\xbf\xa9\xa60=\xc0\xf5\xd4\xbf\xc1mj\x10`\xa8\xe0\xbf\x8c\x9c\xb0\xa0\x94$\xd4?y\xcbIS\xb3\xa3\xb8\xbf\xc5a\xccR\xdd\t\xe5?\x845\xb7=^}\xe3?|L\xec\xcd&T\xe6?\x91\x8f\x10\xc3\x8c3\xdf\xbfN\xc1v9\xde\x8e\xb3\xbf~:\x8d\xf2\xcbG\xcc\xbfy\xafg\x17\xfbn\xdb\xbf$\xd2h)\xc1\xd2\xcb\xbf\x14\xc2r]\x0cL\xe9?PF\xe2\x7f\x87W\xda?\x82\x0c"0\x8b=\xdb\xbf\x9b\xa5\x8aB\x8e\xf5\xd4\xbfsn\xd1\xa1\xb9@\xc7\xbfl\x11\x0cv\xe4\xc1\xc6\xbf\x13\x17\x06\xa1p\x8e\xe3\xbfCz\xac\xc6\x91\x8b\xd0\xbf\x03qVV\x14\xa0\xd7?\x9d\x9d\xe70\x86N\xc6\xbf\xc8\xfb:Gj\xd4\xb0\xbf.J\xb2a%\x0b\xf3?!d\xe3\xcaB"\xaa\xbf\x0bN\x97\xb5\xec\xe8\xdc?\xfa\xee"\xf0\x81/\xdb\xbf>[\xbc\r}\x01\xe3\xbf{\x14\xa0\xd1\xd3\xcb\xe5?\xc4\x81[\x14\xb16\xd9?\xf8\xfd\x1c\x96\xa6\x8f\xbc\xbfP\xf7"]\x80\xe1\xe1\xbf\xfa\xcbR\x90\xec\x13\xe1?\x9d\x83\x07-\x82\xb6\xaa?\xe0\x03\xee\xba\x00\xb0\xe1\xbf0\x8c\xb9\xc2\x93=\xcc\xbf\xa8\xb5\xe4V,\xdf\xd9\xbf[\xe6\xafXe\xaf\xc0?QMbm\xc8%\xc1?\xb3\xd1{7Q\x82\xbb\xbfG\xccAR\xf8g\xd7\xbfS\xec.W\nF\xd6?6o\xa6O\xecw\xe7\xbfX\xc4\x98\n\xea\x07\xe8\xbfg\xcdPnRv\xb4?G\xcad\xc1\x80\xe3\xf9?\\Me\xa16\x8b\xca?\xc3 &\xa2r\xe0\xc5\xbf\xf7\x9c\xdd-{\xce\x8f?\xca\xa6\xa3Q\x99\x81\xcc?\x8a\x0e\xd3\xc6\x96\xce\xec?\x91\x88{\xb76c\xe1?\x8aD\x1dtr\xf1\xef?\x1d\x7f\x80JA\xa3\x9e\xbft\x88\xc0H\xf7\x8a\xc1\xbf/\xc9\x1c\xf3\x9d\xe1\xdb\xbfG\x95@\xd0u\x9a\xbe\xbf\x02,\x03\x7f\xc0\xb3\xdb\xbf\xfd\xc1nY\xfb\xc6\xda?\xb7\x86\xa1C\xf2\xab\xa6\xbf\xaefb\xb2\x14\x0c\xea?V"\xb2.\x8a$\xe3?N\xce\xa6{67\xd6?\xd9\x8f`O\xd0\x14\xd9?L\x87:f\xc0\xba\xc1?\xe8!b\xda\x18\xba\xa7\xbf$3\xa5B\xeeC\xeb?\x89y\'z\x90\x1f\x90?K\x81\xfe\x11\x8c\x91\xc7?\xc7\x18\xb2\xff\xc6}\xb4\xbf\xeea\x89\xf6\xde\x16\xc5\xbf\x81>Qf\xf4\xa0\xd6?g=wqs\xb4\xdc?\xb3[\x83\x0c\x8e\x98\xdd\xbf\xddy\x85\xf0\x1f\x86\xe3?-\x96\xd3\xab\x1dX\xde?\x99\xa5\xae\xa1\\\x8c\xbb?l\xe2\xac\xd5\xb3x\xb7?\xd1\x0e\xab\xad\x978\xb0?A\x98\xf9\x01Jn\xad\xbf\xf8\xc4\x17h\x00\xf9\xd2?\xd6\xab\xc4y\x1f6\xe4\xbf=/\x9e=\xa9\x8e\xc7\xbfb\xe37T\xaf\xa9\x9c\xbfc2r\xae2P\xe1\xbf\xc4\x9c\xd3\x92\xfb\xe5\xd1\xbfI%<\xa7\xad0\xdc\xbfI\xb2HOF\xc7\xe8\xbf%\xbd, \xe3\xfa\xe1\xbf*\x14%XC&\xb1\xbf1Z\xa0+K\xa6\xca?\xcb\x98\xe9[\xeb\x9c\xc1\xbf\x89u\xa7\x9d3\xe4\xd8?\xe6v\x83\xcc|4\xd7\xbf\x1e\x83`\xdcY\xb3\xe7?\xffK\xb98t@\xca\xbf\xea<i8\xd4f\xc2\xbf]b\x87aJ\x1c\xf5?\x11\xfa\xafZ\xd7~\x88?ui%D\x14t\xc6?\x97\xf2t\xd2\xbeW\xcb\xbf\xc5\x9d\x993\x16m\xe2\xbf-\xaf\xbe\xb5\xc3\x8a\xc7\xbf\xf8\xb2\xb7\x9d\xe9\x13\xe4\xbf\xfc9*D\xf3o\xdd?\x93oS\xc0\x1f\xed\xdf\xbfC\xe4\xef.\xba\x01\xff?\xad\x0eA{o\xe0\xb0?K\x0c\x14\xc3\xc1O\xd0\xbf6\xe0\x8a\x1e.\xf5\xd1\xbf\x00\x00\x00\x00\x00\x00\xf8\xff\xa7\xd8\xfd\xb0vF\xc0?e?"\xb8\x13\x8c\xd8\xbf\xbf!B\xee\xbaL\xbb\xbf\x83\x08\x18\x80\x965\xf7?[\xaax\x1by\xce\xda?Wh\xdd\xd5d\x19\xe9?\xc6\xae\xc8\x83A\x0f\xd0?\xc0\xa1A\x1d\x96n\x99\xbf\x16,\xe0*\x0c \xd1\xbfJ\x98c<u\xc8\xe2\xbfL&\xedG\xa2\xf9\xdb\xbfnh~\x86\x8f%\xad\xbf\xd31\xcc\xf2\xf2"\xad?Q\x17=\xf2\xb2u\xd9\xbf\xc0\x96S4(\x93\x01@\xd8QB\xe6\x08\xe1\xe3?\x96\x1d\xb6{\xd7X\xd1?\\\xec\x08\xb3\xb0\\\xe2\xbf\xad\xb8E.\xe5H\xf9?\x9b\xe5\xd1\xd2/\xa0\xe6\xbf\x02$\xb5\xc3{\xd6\xca?\xd6j>`u\x13\xf6?\xa6\xad\xf2t\xb6\x89\xad\xbf\x15\xe4]\x10\xe9x\xbc\xbfU\xed\x8a<X|\xda?\xb0\xb5K\xb6\x96\xc5\xe1\xbf0$-Mz\xc6\xaa?\xe5\xe1\x00\xfc\xd3:\xc0\xbfv\x12PX\x05s\xd7\xbf\x8b\xcb\xc8$\xa9\t\xe2?\xddI\xb4\xd2\xde^\xf0?\xafm@\x8eq\xba\xb1\xbf\x03,$:K\xf2\xd5?\xc6\xa5\xd2*\xb9\xdf\xd3?4{\xb4\xd9\xad\xf3\xde?\x16`\xd5\xaaX\r\xa0?\xc9\x19\x93\xd5\xec\t\x95?\x06t\x06\x96{v\xb0?\xfb\x1eK\x87r\x95\xe0\xbf\xae\xab\xe4K\x82\xae\xe0\xbf\xff\x1f\xb0\x9b\xc7\x88\xd2\xbf\xdf\xca\xde\xf7&\xa8\xb3?\x89=\x9c\xeb\xdfD\xa8?8qU\xa5_\xd6\xca?d=\xbb\x864\x1e\xdb?\x0e4\xa3\xde\xd8\xf0\xde\xbf`5\xa4v\xeb\x14\xe6\xbf\xf2\xa3\x9a\x08\x1f\x7f\x97?hS\xec\x1dnl\xd3\xbf\xc5\xd9\t@{b\xb5?\xb9P\xf3{*#m\xbf\xd0j3%\xdd\x92\xe7?\xc6\xa7g\x82\xa5\xca\x94?\x96\x9c\xb3\x85D\x1f\xeb\xbfVf\xc1m\x89\x13\xc8\xbfQ\xce\x02\xa9\xb6_\xb9?&\xb6-\x89\xc9\\r?\x8c\x10\xaec\xb1P\xc0\xbf\x80\xc1[e\xc8\xff\xdc?\xa3\x17\r.\xfe\x99\xd1\xbf\xa3\x0b\xeaC\x91\x9b\xc3?3\xed\x06\xfc\x9b\xfb\xe8?\x18\xc3\xbc\xac\x00a\xdf\xbfJ4\x9cw\xe4\x8c\xd1\xbf[\xd0[!\xc6\x04\xe3\xbf\xaa\x11f\x1c\x07\x1e\xb9\xbf\xe0<]=\xa82\xbd?9\x17\x8e\xb0dO\xed?\xa8=\xbe\xbcnG\xd3\xbf\xd9T*\xf9\xc4\xec\xd0?\xfe\xcf\xb4\x16q\xe5\xe8\xbfY\x93\x19;\x12p\xe4\xbf\x1c\xed S8j\xfe?\xd8\xbd\t\x02\xe4\x9a\xb4\xbf\xf0^)wx\xb7\xd1\xbf\x80\x0c\xf6b\xaf3\xe1\xbf07\'\xd7!\x98\xde?\xe7v%\xc5\x15p\xd2\xbfu!\x14M\xe5\xd7\xab?\xf7I\x8e8O\x98\xc5?\xa15\x98\x9a\xcc\x1a\xec?\xd7\xb3B\xa1\xb0\xd7\xf0\xbf*%\xc8y\xf1\xc6\xdc?\xdc\xb5|Z=/~\xbf3|\x0e\x92\xd4\x16\xc7\xbf\xc9T|\xbbQ\xa8\xbe\xbf\xaf\xd5\x86f\xbf~\xdd?%\x101\xbc\xdd\xf4\xdc\xbf\x1b\xc7\xbc\xa5\xd7\xe0\xec?\xb9\xd7Y\x06S\xac\xd0\xbfS\xaa\xe2\x18\xf4\xa2\xc7\xbf\x96\xe3vG\x10\x06\xe2\xbf\x839\x0c\xd8}\x89\xc7\xbf\x0c\x91E\xf9\xa9\x9a\xb7?\xbb\xbc\xf3DZ\xda\xbf?\xa3\x880\xd0o\x18\xe2?\xf4\xf4\xa7\x92CK\xe1?\x00Q\xf8}\x97\xe7\xda\xbf\xe7\xd2l\xb5\xba\x9c\xd0?\x95\t\x1f{\xd5{\xbb?\xeff\x854\xc5|\xce?~i\x7f#\xf6\x93\xcf\xbf\xa6\xfb\xb4\x849\xed\xcf?\xa6\rOS1#\xe9\xbf\xa9{\x9f\x98\xa7\x16\xed?h\x7f\xa1?\x98\xde\xe1\xbf\n=E\xfa@\x81\xc8?5\xa6\x19xk\xb7\xce?#,\xa4->\x1c\xe9\xbf\xf6\xf7\xe7\xcc%\xf6\x90?`\x95U\x1a\x94\x90\xe4\xbfs\xb1\x8fx\xed\x97\xb9?n\xde\x13\xa5n\xbb\xdf\xbf\xef6tWo\xbb\xce\xbf-\xd3b\x9c\x0f\x97\xb6\xbf\x91&r\x0f\xf7\x8e\xc5?\xcc]|\xe5\xd3V\x02@\\\xd4\x98\xa2\x17\x08\xb8?\xbeS\x93%\xb9\x0b\xe6?\xa5\x83,n\xff\xa1\xc6\xbf\xf3\x81\x86\xd2\xfbH\xe6\xbf\x7fG\xed;\x91=\xdf\xbf\x06N\x99\xed\xb0\x91\xda?\x81\xc7\r\xe0o@\xe0\xbf\xb9\xaa\x91\xe2\xb1\xc2\xe0?\x07\x87\xd6d\xdf\xf3\xe0\xbf\xde\t\xf0\xb3\x05\xd0\xf4?\x12\xd1S\xab\xad\xd2\xc4?\x7f\xd4\x80\x83\xea$\xfb?.LI\x82#\xba\xc7\xbfK}"Eu,\xe0?\xe8`\\\x83\x9d\xed\xea\xbf>\xba\x7f@\xf7]\xcf?ApQ\x9d\xea\xa9\xe6?\xa8\x102T\x92\x98\xd0?\x9eQ\xd3\xff\x04\xc8\xeb?v\x9a\xc3/\xe5I\xcb\xbf(C2\x01|\x10\xfb?+\xa0]\x0b\x06f\xe9?8\xbd\xbfYP\x99\xdb\xbf\xfb\xd8\x91\x01\xc8\x18\xcd\xbf\xd5\x99U\xac\xb0o\xd7?M\x85|\xf5,\xbc\xd3\xbf\x0fd\x99\xb1H\x82\xe1\xbfG\xcaHZd\x1f\x8e?\xdd\x1bN\xd8\xe7z\xe7?2}\x02\x1aV\xe0\xd0?\xe6\x14_C\x9a\x81\xd4\xbf\x0c\xc3wU\x04\x80\xe1?\xaa\x95\xc9\x07n{\xc8\xbf\x95\x9e\xdbtP\x9d\xd5?k\xfa1\x84\x81\xe9\xcf\xbfj\xd2\x07\xf3w,\xbc?\x16K\xfc\xd8Z\x11\xdf\xbfZX\xf56c\x99\xca\xbfk\xd16\xeczU\xd0?\x0e\xd1W\x015\xdd\xf0?\x8f\x19:\x94O\x85\xe8\xbf\x90\xbe\xbf\xf1\xe2,\xfc?\xf6\xf4\xc7#+\xf0\x91\xbf\xc7[\xa3P\xd3\x0c\xf5?\x93\xbdC \xb4M\xe1\xbf\xcd@F\xc4\xbem\xdf\xbfB<\xaf\x9d\xaa`\xd3?\xd1\x95ZNL\xa3\xf3?\xa2\xf0\xbfr\x1fG\xeb?xS\xb9\xec \\\xd7\xbf\x91\xf66\x87\x10\xa8\xcd\xbf\xc8\x14\x04J.\x9d~?V\xb4\xbb\xcb\xdeR\x8d?}\x0fT\xc6ha\xf9?jc\xdc\xe8\xbd\x8a\xdd\xbf\xd8\x1b\t=q\x94\xd6?\xa1K\xa9\xf7\xe3y\xdb\xbf\xe2\xd2\x1ex\x02\xaa\xdc\xbf\x05\xe2zM\xf5\xbc\xe0\xbf\xfa!\xaa\xf2\\\x87\xa3?w]<\xb5\xd8\xc4\xfd?\xae\xaf<\xe0aL\xb5\xbf\xe6}\x7f\xd6\xd5\x96\xe0\xbf\xdf<\x86\xab\r\xc9\xda\xbf\x1a/\xc5\xd0N\xb3\xd4\xbf\xb0R\x89A\xe7E\xb3?\xcf\xb4\x10\x95\x1c\x1b\xa8\xbfx\xd0\x7f\x95\xe8\xbc\xcf\xbf\x81+:`\xb2r\xdf\xbf)\xd7Q\x03U\xab\xd8\xbf;\xe4\xae\x11\x03:\xd7?\xb5\xb8\xa3]v\xac\xf6?\xfa\xf2A\x8a\x17\xd3\xe1?\xce\xee\xbc\x9f)y\xd4\xbf\x98\xf4vBF|\xeb?"\xd9\xa0\r\x1a\xa8\xa4\xbf#a\x92\'\x96?\xe2?\xc8\xe6\x0e\xa4\x1f\xa8\xd4?\x08.\x0fHd]\xc3?\xfc\x8b>2\x9e\xa9\xd3?PX\xe4\xaf\x08\xb5\xbf?\xf3c\xc6\xde\x1eH\xe4\xbf\x94\x86\xca\xae\x17\xb3\xbc?a\xd4&\xec\x04Y\xf5?/\x85hO\xb4E\xf8?\xc8)\xecq!\xa5\xdb\xbf\x00\x00\x00\x00\x00\x00\xf8\xff>\xff\xa4\xd5Du\xcf\xbf\n\xc2Tr&T\xb9?\xa2\x8fP\x9bDD\xbd?\\\xe7w-\x18\xef\xe2\xbf\x01/"]pJ\xc5\xbfi\x9aY\x8aA\xe5\x80\xbf~\xbel\x96\x0c\x8b\xc6?.\xfaP\xb2\x8c\x1f\xdb\xbf\x83"\x9c\xda\r5\xed?\xd8Cm\x1b\xc5\x8c\xac?\xda\xa8\xb8$\x12\xaf\xde\xbf\x0bQ\xe8\x8d>\xc4\xa5\xbf\x81\\_3\x12\xe6\xd8\xbf\xa2\x99\xd8\x1e\x804\xe4?ub\xf0\xa33\xe2\xc1\xbfN\xa9\x08\xb3\xc12\xe4\xbf\xe3}\rN\x94ax\xbf\xaa4W<Z\xdd\xc5?\x9fi\xbc\xd4\x16?\xe9?\xbe>\x19H\x92k\xb6\xbf\xc2\xfe\xe3\xa1\xa6\xd5\xc2\xbff\xd6\x1c\x8b\xfa\xb5\xc4?\x8a\xfbP\xcf\xc3\x00\xce\xbfyz\xf0\x99\x01\x97\xde\xbf\xd8\x18|J@!\xe2\xbf\xb2\x16\xbcP\xccn\xd0\xbf\xe63\x1ba\x06\xff\xb8\xbf\xb3\x16\xabT\\\xdf\xe6\xbf\x0en\xb4\xf3#\xeb\xe3?\xad\xb2\xe7H\xb8{\xb5\xbf\xce\x05\xdb\xe8\x80=\xe5\xbf\xb5\x94\xb5cm\x0f\xd2?\x99x\xda\x81P+\xe4\xbf\xab\xc1\x18\x14\xbc\x04\xe7?\xbc\xe1\'\xf2}\xc3\xa9\xbf[c\x9cY\x89\x84\xec\xbf#: \xbd\x1f\xfd\xd5\xbf\x9a\xe0n\xdaX\x17\xea\xbf\x85\x92X\xde\xa4Q\xe6\xbf\xc6\xde\x13\x88\xdf]\xef?|\xc1}\xe3\xaeh\xd2\xbfm;\t\xe9\xac0\xda?\x1f<\xec\xe4\xc5T\xe1?\xb6\x0e\xde\x8b\x97\x16\xe1\xbf\xfe\xe5\xf5\'\xba\x1f\xe9?\xdck\xbac\xd0\xdb\xdc\xbf<_\x0e\x1fs\xb8\xd3\xbf\x97\x1d\xc4\xf0\xeb\xa0\xfa?\x8d\x82\x8c\xf7\xf3]\xdd\xbf\xd7\xf6}\xc1C\xb5\xd3\xbf[\x1b=\x04.\xc7\xc6\xbf$\xb5\xc9\x9a\xc4\x11\xe0\xbf\x00\xc6d\x84\xbd\x18\xd1\xbf\x15r\x0b!t\x96\xd1?\xc6T:2\xc2\xce\x8c?\x84\x80\xfeI\xb7\x8a\xe2?\xeb\x98\x83\xe9N\xd0\x88\xbf\xd2\xce,\x91\xb4\xdb\xd2?\n\xa9>\xc1\xad!\xe1?\xbc\xf6y\x170\xe4\xd7\xbf\x90\x8f\x96\xe0\xd0\x11w\xbf\xa1Jss\x93~\xe1\xbfB\x05\xc7\x8c\x17\x90\xe0\xbf/\x17M\xac\x86\xac\xb2\xbf\xdd\xb9A\xf5\xd0n\xcd\xbf\x95]\t\x8e?\x1b\xd0\xbfTK\x10\xa8t\xef\xa5?Q\xfb\xbc\x8f\xc8\xbb\xe4\xbf\x1bl\'\xac\x141\xd8?\xe6\xca6$\x1f\x00\xc0?\x8a\xb8Y\xd8p\xc3\xb9?\x1eh\xbfe\x9b\xe5\xc8\xbf\x81>\xcc\t\xa7m\xe0\xbfg\x7f\x0em[\xa3\xe3?h7Vj\x020\xd7\xbf\xfb1\xf7_v\xd4\xfb?u\xa5\x84<\x9a:\xd4\xbf~\xa4\x80\xf9\xe9\x97\xf1?o\xfc\\\x7f\xfd\xd4\xb0\xbf"\x17c\xb7P\xb6\xaa\xbf\xd7]\xde\x0bc\x1a\xb9?_\x7f?\x83!\xfb\xdf?\x9b,\x99h\xbcW\x99?J\xd7\xd5~\x1c\xba\xd1?\xb9\x17IsEt\xd7?\xe0\xb0&\x91\xab\xf3\xc5\xbfM\xad\x1a\x00\xee\x03\xf3?\x8b\x06&\x0c\rg\xbd?)C\x80\xe7\x16\xf6\xdb\xbfD&\xd2\x981i\xfc?\xd0\xb7\xe6\x8b\xdf\x85\xd2\xbf\x85"\xa6R\xd9\xa4\xf0?|A\xc84\xf2\x8f\xe2?\x12~z\x7f\x02\xd0\xe0?jq\xc3!4\x81\xd7?o\xc9\xb1\x05\xc1\xd9\xdf\xbf\n\xcf\xa8-o\x96\xe9?Q4\xe7\xac\xdel\xf1?\x19LG\xba\t\xd5\xdd\xbf\xba\xdd;/\xd7\xce\xeb?\x9e(\x8f\xaa\x14\xc0\xc4?\x9b\x06\x07\xcc\x8bX\xb9\xbf<\x8e\xee\n0\xaf\xc3?\x12\x96\x8f\xdd\n\xf7\xd1\xbf\xf9;B\xd6]]\xfa?E\xb6\xec\xc3@D\xa4\xbf-\x89\xfa\xcd\xcfj\xd9\xbf\xd0\xee\x08\xb0\x05^\xc4?"\xdd\xda\xf2\x81\xbd\xe1\xbf\x89\xf8\x10\x8f\xf5\x1a\xc5?\xc2\x12\xbc\x98\x9cv\xbf?\x1d\xe3\xe1\x93\xd5\xaf\xe3?\xd8\x803u\x9dA\xa4?\x01\xf2N\xbd\x90\xdd\xe6\xbf\x1e\x18\xdd]J&\xe2\xbf\x18&\x95\x12N\x96\xc2\xbfJ\xe9\x02\x02\xd7q\xe4\xbf\xa9\xb3\xd1\xfbuO\xd4?\x9e\xa3\xff\x8d\xbd\x16f\xbf\x80r\xb8\x97\xc0L\xc5\xbf\xedB\xd1p)\x86\xd8?\x92\xee\xf5\x15\x9d\x88\xe2\xbf<\xf9\xe6~K\x1d\xda\xbf"\xdf\x07Z\xf2Q\xe2?-<\xf9(u:\xc9\xbf\xe9\xdeu\x9cH\x1bz?\xabT\xcb18\xd2\xdd\xbf\x84d(|\xfe`\xf8?\xcdj\x9f\x1ac\x9b\xca?\x14S\xf4g\xb9\xf6\xda\xbf\xe36g\x7f\xae-\xe4\xbfb\xae\xa4\xe0\x91\xba\xe3?\xe3\xc5\xf6\xff\x85\xd3\xcb?\xd0\xd2S\xa9\xb1\xc3\xe0?\x0f\xfa\x08\xf2\xf2g\xf1? Ww\xfe\xb8\xc3\xb5?\x15i\r\xde\xc0+\xcf\xbf\xec<\xceR\xb8i\xe8\xbf\x0f\x81,:\xb5\x88\xbf?\x84\xb7\xdbo\x97\x1c\xab?\xaf\xc2\xad\xb1Vu\xc9?\xc2_\xdeG\xec\xa9\xcc?\x05\xbc\xcb$\x00\x1b\xda\xbf\xbe\x8d\xd1\x7f\x94\xa0\xda\xbf\xb7\x1e\xc4xR\xa1\x80?\xf1\x8b1\xe5\xb9\x96\xe3?z\x98\x8b(\x17x\xe1\xbfu\xe6\x83=:\x17\xae\xbf\xf9\xd3\xf6*\xce\xa9\xb2\xbfZD\xf3\x0b\x02\x92\xb6\xbf\x1d\xa1\xdc\x953\xee\xc0\xbf\xd2r\xd8"\x11\xdd\xc3\xbf\xaa\xaf.\x86y\xf4\x8c?\x98j?O2<\xd8\xbfnMh\x83\xf1\xd6\xde\xbfe\x07j{3\x82\xe3\xbf\x8c/\x82\x81\xe4o\xfe?Fa#\xa4\x8c\xea\xcb?;\x994\xddHN\xd5\xbf1\xb4#*\xfe\xe5\xdb\xbf\xc6_\xe0\x01\\\\\xe3?\xfc\x91\xf0\xc4\xb5t\xc1?r\xf8a_\x1e\x9b\xaf?\xda\xb4\x19K\x1e\xfe\x7f?\x85u\xb5\x97\xef\xf9\xe1\xbf\xf5#\xb7S`\xae\xd3?\xb6\x0eQE\xa4\r\xe7\xbf\xd8\x93A\x1c\x863\xdc\xbf[\xc9\x898\x15\xa4\xd1?R\xf6\x7f\xb6\xb2\xfe\xc7?\xd2\x02\xcb\x89\xbe\\\xd3\xbf\x10\x9av\x14\x05\xd6\xdb\xbf\x17.\xd3\x07\xc3C\xc0?I\xa0\\\x97z?\xee?%\x06\x87y\xc8\x0b\xea\xbf\xa8\xd8\xe8\xafV\x17\xee?\x12h\xbb\x02L\xd9\xd4\xbf\x88G\xf1:\xab\x12\xd2\xbf\x1c\xee\x98.\xc5\xe7\xe4?W\xd1&\x19\xa3\xbd\xc0\xbf\xbb\x97\xb1Ou\x99\xb6\xbf\xa3\x85\xcf\xeeK*\xdd\xbf\x0bJ\x19\xa0\xaa\xac\xba\xbf\xf8\xa0e\xe8_\xcc\xd0\xbf(\x1d\x15\x8f\x9b\xc5\xd6\xbf7\xec\xc2\xcdm\x88\xc1?\x99#\xd1\'\xb1`\xde\xbf\x9a\xf7\xd2\x81\x8a3\xe3\xbf[\x8cl\x94\x08\xd3\xe3?\xd8\xc5\t\x90I\xbd\xe4?\xac\xd0\xebQZ\x97\xce?\x02\xe6\xaa\xd7r\xf8\xbf?\xe6\x02\xdd\xba \xe0\xe4\xbf%\xae\xfb[\xaf\xfe\xed?\x17\x1a^0\x0f\x7f\xe0?\xf0\xf6b\xb6\xb9\x02\xcd\xbf\xfa\xcb\x12d\x02\x8a\xde\xbf\xd3\xbd]H\x8d_\xd2?\x1e\xe0x\x90G\xeb\xce\xbf?\xe7\xef\xed\xa4\x15\xdc\xbfX\xd2\x01\x93t1\xaf?#\x11\x9cz!\x14\xbe?6%\x0ex\xf1\x8c\xdb\xbf&\xfb\xa2\x9f\x89\\\xb7\xbf+\xd7\x96\xdc\xa3R\xc1\xbf\x8fV\t\xb68\xb5\xd3\xbf\xc2\x17;\xddq\x95\xdb\xbf\xf1\xc3\xc5\xe7G\xd7\xc2?5q\x9c\xc9^\xec\xe4\xbf\x7f\x9aF\x97\xb5\xa3\xc7?\x15\t\x8c\x9fY\xcd\xda?\x1er\xb2\xc9\tt\xd8\xbf\x8a9{\xaf\x9e(\xe8\xbf\xd4\xb2\xc4lpr\xe0\xbfN\x14s\x14|\xed\xaa?\xdc!g\x9b\xc4r\xd4\xbf\xfa \xb4\xa8\xe7\xfa\xdb\xbf\xf53V\xcf\xc0 \xda?\xca\xed?%\xe6[\xd3?@C<M\x15\xa5\xc0\xbf\xf6\x96O\xa4\xdd\xc3\xd1?\xd5Z\x82]\xa1N\xd1?W\x96s\xd8D\x1d\xca\xbf\x8b\t\xbfQ\x86\xb1\xe6\xbfLh\x9a\x80n\x03\xdd\xbf\xf7\xfe\xcf\xe4Z~\xd5?\xfa\xc8\xf0\x05K\xa4\xe7?!\x03\xb5\xd0\x14\x03\xbc\xbfmk\x8ee]6\xe3\xbf\xa2\xc9\x0b\xf9\xd8\xd5\xd2?\x17\xcfI\xbf%\xee\xe0\xbfa\xda\x1d\xce\xe9\xa9\xd9\xbf*KN\x1b\xab"\xc1?3\xdc\x15\xaeKR\x93\xbf4\xac\x12J\xe3\x00\xd2\xbf\x8b\x95\xbf\xabt\xb0\xc3\xbfn\x85A\xcc\xb7.\xc2\xbf\xda\xbb\xf2\xb3d\xd7\xe2\xbf\xf2\x9fO\xed\xef;\xf2?\xb2\x07\\BV3\xe5\xbf=\xb2\xc9/\x8d_\xe7\xbf\xbf\xe0\xd1\xaf\x02l\xaa\xbf\x80\xd2?\x03yd\xf5?\x88N\x84*\x95\xa4\x9e?\xf3\x944\xb6J/\xc0\xbf\x1e\xa3@Rc\x1c\xe9?\x8d\xd0l\x1cZ\x1d\xe4\xbf\x0f\x19EG\xdc \xf7?\xc6\x89W\x82\x83>\xe1?\n\xf68,\x92\x9b\xf2?\x8bWp\x06+\xe5\xc2?\xd0\xbc\xafE\x9e\xb0\xef?\xb5\x11\\\xfeu\x0c\xe0?\x06\x80\xabx*l\xb8\xbf\xd38\xc0\xb1oh\xe8\xbf\x88\x03h\x85\x00\xb6\xd8\xbfeR\xea\xb4\xd5\x02\xdc\xbf\x88\x1d\xca\x95\xdf=\xbe?O\xb1\x94\xd3\x80\x98\xd0\xbf\x027\x80e\x9d\xcd\xf7?`\x94U\x8f\x81\xda\xbb\xbf\xa7\xafts\xb4\xd4\xdc\xbf\xa5\xa4\xb5CSh\xb0?\xcdV\xddq\xe1\x1f\xdd\xbf\x07\x99\xf3O\x9df\xe0\xbf{\x96\xca\xcc\x87\xb6\xc5\xbf\x98\x7f\xb9ik\x07\xa5\xbf\x03\x1fK\xae\xae\x9a\xc5?;\x03/\xf8\xd9\t\xe9?\xa9\x18\x08\xe9\xc9\xfa\xb7? 0\xd2\xae\x91\xb5\xdd\xbf\xfe\xf0\xa4S\xfe\xb7\xe8?=\xab\xb2er\xa2\xf5?\xbf`\x95>~\x16\xcc?YR\xf2l|}\xd3?\x7f\x80\xaf<\xa03\xb7\xbf\xcf7;\xe1XO\xe7\xbf\xc8U2JZ\xb9\xd5\xbf\xd3\x90iI\xf6\xd0\xec\xbf,\xd9I\xc8\x15\xaa\xd6\xbfl,iG\n\xc2\xd8\xbf\xac\x14\xec\xb5\t\xe8\xed\xbf\xc5\x05\xba"=o\xdf\xbf{\xf3h\xe0\x97\x03\xcb\xbf\xa6LxR\xbaew?u\x98Q\x84n"\xdb\xbf\xfc>Q\x81\xa9\xe0\xec?\xa6H\xa9\xfd_\xfc\xc9?z\xa5\x01\xbex\xaa\xe4\xbfv\t\x08\xc3\x9f\xbf\xe3?\xd40[?q\xd4\xb5?\xe7\xe3\x14\xa3\xa9\x1a\xe0\xbf\xb6D,\x96\xc4Q\xba?3\x97%\xf2:\x13\xb2?+j\x86\xa5\x9e\xe6\xe0?\x1a\xa8|\xbb\xdd\xb0\xe1\xbf(1\xd4$t\xae\xb5?\xa7\xb56\xf9\xf4\x92\xcf?\xb1\xd2\xda4!m\xe2\xbf\xf7\xba\xa76{\xb8\xdd?\xf7N\xa9O\xe1\x15\xf0\xbf`}\xbc\x91\x11\x04\xc9\xbfc\x868\xa2\xd0u\xe0\xbf\xa8\xaf\xbe\xc8\x1f\x16\xa8?FC\xc7\x9f\xabX\xf2?g\xdbx\xdb\x1bn\xad\xbf\xc9\x10C\x0b\x18.\xb6\xbf\x00\x00\x00\x00\x00\x00\xf8\xff\x03\xd5\x03\xed!\x8d\xd4\xbfJ\xe3\xba4\xae7\xea\xbf\xb3\x87"\xba\x9c\xf3\xe3\xbf\n\xe1\x00\x904s\xe6?\xa8\xaeB1\x0f\x83\xda\xbf\x1dj:\x1f\x15\x82\xd8?\x86iB;k \xe4?\t&\x8e\x99\x97\x08\xdc?\xc0\x87\xc7\x05S \xc3\xbf\xf7\x92\xd8\xa6\xc0E\xaf?6D\xb4\x0f,\x01\xb7\xbf\x1b\xe4\xf3x/A\xe7?l\x19\x89\x8aD\r\xc2\xbf\x03\xda\xc8B\x95f\xd3\xbfl-A\xec\xca\xf9\xe2?\xa7\x1c\xdal]\xce\xe2\xbf\xa2\xf3\x97\xfe\xa1u\xde?\xc0>\xd5t\xd0\x9e\xd8\xbf!3\x8e$j\xd9\xf1?\xfc\x13\xc4\xc3\x07k\xe9\xbf\xdd f\x1e\xe77\xa4?\x8e\x8fh\n[\xder?\x13\xba\x96\xbe\xcd$\xe0\xbfG1J\xc2:\xc9\xcb\xbf\xca\x13\x13\x1b\xf2Q\xea\xbf`h\xadM\xfb\x17\xe1\xbf\xb6\xd4\x14 )f\xcc\xbf\rW/\xbe\xd9\xd4\xc6?\xa1\x85y\xf8\x0f,\xd3\xbfb5\x16\xea\xee\x93\xdc\xbf\x0f\x088=\xf1\x97\xf6?Q[\x12\x7f\xe9\xf8\xba?Bj\x90\x80\x8b\xe6\x93?\x1akCf\x01\xc1\xe5?\xc2\xd0\x00\x8d\xf2\xf3\xdf?\xa6A\x07\xae\xe6\x04\xc7\xbf\xdb\x9b]5g\xd4\xb0?\xc4\xdc3$\xde-\xf0?\xc8\x8f\xae\xd8=\xb3\xe0\xbf\xe5\xca#\x86_\xe0\xbe?q\xd5\t\xc5\rk\xcc?E\x81\x84\xa3\xa27\xe0\xbf\xb0\x12:\xb7\xe2\xf1\xa7\xbf\xd9 \xe1\x80K$\xe3\xbf[)\xb7\xab\xbcB\xe1?;\xeaK&e\x92\xe4\xbf\xd7\xaf\xa5\xbe\x0b\x85\xe5\xbf\x7f\x9e|\xbbJ\x01\xe6?\xa9\xe67s\x14\xf3\xcd\xbf\xd8u\xd6\x0f\\\xda\xc2\xbf\\\x1b\xf5\x18B\x1d\xdd\xbf*C$.(*\xac?\x9aMI\xde\x83\xc4\xc6\xbffF\xb7d\x00\xaa\xec\xbf!\xa1\x89\xcc\x11\xc5\xd5\xbf_>8\x9fk\x0e\xc1\xbf\xb8\x1c\x11\x96t\x9b\xbf?\xfcg\x9e\x8c\x88\xbb\xda\xbf\x90\xdb\n\x15\xdf\xca\xeb?\x86\xd2\x0bP>\xaa\xd3?\xb0\x11\xdb\xed\xc9\xed\xe1?\x9c[\x1e 64\xdc\xbf\xdf\x85\xa5{\xf4\x19\xe1\xbf\x93l\xac\xb5\xf4\xf6\xe6\xbf\xfc`\xec?f*\xf7?\xca"9\xce\xb0I\xe8?\xbe\x98\xb8\xf0\xa5h\xdf\xbf\xcd\\\x8f$\xd7\xe8\xe5?\xea\xd7?\x1dy&\xd7\xbf\r_L\x936\xf1\xf7?X8\\u*\xcd\xc8\xbf\xc6us`\xc0x\xe3?\x17\xf3\x0c\xf6_\x14\xdf?\x11\x19\x91\x14\x95\xd9\xd9?|\xb1\xbfZk\xc2\xe1\xbf\x85v\xdbu\xd2\x8f\xd3\xbf2\xbd\xdc\xdd\x91<\xe2?\xa9ufk/\x05\xde?J\xf1\x92=\xc9\xba\xd3\xbf\xe5;\x919\xf3\xa3\xeb?\xc6\xe8\x84\xa5<\\\xdd?7\xc6\x03:M>\xf1\xbf\xca_\xa2O\xfb\x02\xd7?\xaf\x884\xf1\x16T\xe3\xbf\xfc\xc1G\xeb\xdd?\xf0?(*\x13\xed\x16\xb5\xe7\xbfD\x1e\xd35r\xf5\xec?M\xaf\xc3B\x1b\x1e\xda\xbf\x05\xa4\xb7\xd6s\xb5\xe9?g\x1a\xe4\xaf\xcc\xd9\xa2\xbf\xac\xcfJ\xfa\x0bk\xd8?3\xf9\x16\x07k\xf5\xd5\xbf;H\xe2E\xa0\x1c\xc6\xbf\xffs\x05 \x8c\xe2\xd7\xbf\x8b\x11Ej\xa5n\xd8?\xf1\xa8MR_\xd9\xe7?_\x88\xaf\r\xe2\x1e\xe7?\xffi\xee!&\x8a\xd7\xbfJ\x06\xa2\xbc\xa5\xcf\xe7?0`\xce\xc0\x08_\xc4\xbf\xbd\xf7Xa\x03\x9c\xf1?\x1c{~\xca\xee\x8b\xd4\xbfK\xaaV#&\x90\xc6\xbf\xa1%!\x14\xff\xce\xca\xbfu\xda?3\x8c\xfd\xf0?\xb6\x8e\xf8G\n\x7f\xe7\xbf\x1b\xe6\xb6\x86\xca\xa5\xb1?\x9a\xcb\xce\xebD\xde\xc7?j\xcc\xca\x15[;\xea\xbf\x95\xbeO\xd0\xe5\x9a\xe4\xbf\xe1\xbcQ\xf14\xe9\xd6\xbf\xc7\xaf\xf0\x97\xa6\x1d\xd5\xbf\xff\x12\xa5\t$#\xe0\xbf\xa0h\x8eD\x8dNW\xbf\xaf\r\x0b\xa8\xb2\x12\xb4?\xad\xd3\xe0Q\x10\x05\xce?\x8b+T\xa8\n$\xc1\xbf\xc8Vuj\x87\x17\xc0?\x91)\xda"\xad\xe1\xcc\xbf"T\xc2O\xcbc\xe3?xc\xe1\x1c\x9a\xd5\xe5\xbfq\xf0\x89\xd2Q&\xe0\xbf\xa2\xd1Q\xb8\xf5S\xff?\x98\x1a\xacOW\\\xc2?\xcd\xa1\xbaW<\x96\xe7?\xef\x81\xdb\xe2\xe2\xbc\xea\xbfYmvHzs\xed?\xd2\xea\xab\x9a8m\xdd\xbf\x98\xb4\xf1k\xfa\xde\xf6?\x81\x1a\x89T\xdf\x16\xd7\xbf\xe5(4\xa4,\t\xdc?\xc7h\x7f\xe3\xd2y\xa2?\xae\xe4 k\xe3\xc2\xd5\xbfR\x91Ff\x12\x05\xc2?\x9f\xcfPV\x9fZ\xe2?,\x08\x1d2\x90-\xe7?\x11f\xc6Z\x0cL\xc3?\xc1.\xcem\xb2>\xef?\x0f=\xe9\x05\xd6G\xed\xbf\x1cx=`j\x7f\xe0\xbf \xe8\xbc?\xd6b\xb1\xbf\xfc\xdd;&\xd40\xb0?!g\xfc_\x10&\xe3?\x06\xdd\x81\x9eyG\x9c?\xe9\x08\xe7\xf9w4\xd6\xbf\x01\x12\x9e\x91\xd1+\xc6\xbf\xba\x8aW\xa1\xfb\xe8\xd4\xbf}3\xcf\x88\xc2\x8c\xe2\xbf\x823PQ\x89j\xd6?|n\xdf\x87\xc5l\xd3\xbf\xfa\x11s\x99\x92\x92\xf2?+t,\xac<\x19j?\xe1\x01\xec\xab\x9fT\xeb?\xc2\xbc\xe3\xc47\x99\xfc?\xcaO#o\xe3\xbc\xf0\xbf~Sr\x8d!\x86\xeb?\x1a\xac\xe7BC\xd9\xd4?\x05E+\x00\x95\xaa\xdc?4\x9bT\x83\xd5(\xf1?\x83\xe4\xe93\xbd\xfd\xe0\xbf\xfe\xd0\xbf\xd5\xf6\r\xfb?.\xf1\xa7F\x08r\xe2\xbf\xd3\xc7\x80r\x1f\xdc\xd8\xbf\xe9$y\xdc\xdal\xd8?\xe2@:F\x1a\x02\xb5?\xe9\xf8\xb0@\x05w\xe1\xbf(\xea\x17\x9e\xc0i\xd7\xbf\x90;\xa6^\\\xf0\xa2\xbf?"0}t\x83\xbf\xbf\x0cH\x17\xb6\x89\x84k\xbf\xa7K\x1f\'\xad\x0b\xcd?\xa8\x86\xe8\x8e\x94\x17\xd4\xbf\xca\xc2\xb9L\\\x96\xcc?xSz\x8e\x88\xfe\xe1\xbf\xd0\x8f\x1b\xbd\x0e\x08\xd2?\xaamc\xb4\\e\xe7\xbf\x17\xab\x1e\x96\xc3\xac\xdc\xbf\x80\x8a\x80\x14;\xf5\xea?fj\xfdB\xc4\xb0\xf1\xbf#Lm`\x94B\xd2?\x0f\x9bD\xe7\xf9\x95\xaa\xbf\xae\x01p\xf5\xf5T\xd8\xbf\xcf\xa4J9\xd1e\xda?\xc51x$2\x07\xf5?\x0c\x7f\x9b\x9a\x8b^\xdc\xbf\xa2\xc0\x9c\xcftb\xfe?\x1a\xc3\xaec\xbf\xed\xaa?\x04\xbd\x19\x83z\xf3\xc2?\x80\x8c\xbcEe\xfd\xeb?\xe9\xb5\xef\xca\xd1}\xcf\xbf5\xc2\x10.\x18)\xdd\xbfM\x87\x88\xc3\xfc\xbd\xb3\xbfcB$\xa8\xd7(\xb5?9\xff\xfd\xf4I\x9d\xc0?F\xe0\xba\x9aa\x90\xe0\xbfa\xf2NX\xcd\xdf\xd6?\x86I2z*#\xf1?\x85a\x0c9{\xf1\xbc\xbf8\x95c-\x93\x01\xe0\xbf\xd9\xdfT=l~\xbe?\xe7\x13\x83eG\x10\xd2\xbfc\x17\x82Z<\xfd\xe0?+k\xd3\xe9\xe38\xdc\xbf\x00\x00\x00\x00\x00\x00\xf8\xff\xc0\x10\xedO\xcc`\xb7\xbf\xfe\xf8\x02C\xc3\xe8\xa3\xbf\x13\xb1L_,\xb5~?"e\xc514\x99\xe7\xbf\x88/\x8b\xe1\x0b\xcc\xd4?E\xacD\x86\xc0r\xaa\xbf]\x07A\xc8\xd3\xab\x94?\x86\x1a"4\xfc|\xe9\xbf\xfa\x07\xce)\x06\xaf\xe6?\xc8\xd6<\r\x9d\x16\xe9\xbf\xb95X\xd3-q\xe6\xbf\x91f\x0c\xa8\xcc\x0e\xc2?\x01\x05p\xf8\xc4K\xc4\xbf\xe0\xc3\xfc\xda\x98\x1c\xe9?\x19_{\x05Cp\xbe?\xd4B\xf0$zj\xa4?\xed\xc2Z<T\xed\xec?\xb2\xa6\x96\xd4\xcb\x11\xe5\xbf\xbb\xa8\x15z\xfaQ\xd8\xbf\xf5\x9c:3\xc6\xc4\xc3\xbf\xa3\xcd!8y\x18\xdd\xbf6.\x1e\x14\'\xf0\xaf?L\xbcT\xadgJc?&\xf3M\xcf\x1a\xea\xa6\xbf\x19\xcc\xd8\xec\x96\x99\xdd\xbf]y\xcd\xb5!X\xd1?z\xff\x05\x15\x8d\xa7\x97\xbf\xcdHU{\x08l\xe1\xbf\xffE\xc1\'\x19\x9c\xf3?u\x9d\r]\xfa\x94\xca\xbf3C@\x9a\xc9\x01\xde\xbf\xf0 %\xb5\x1a\xe0\xc7\xbf\xadF~y\xe0\xd0\xe3\xbfp8\x165\xf4N\xef?\xab2\x8b\\+\xff\xed?\xd2_\x10_\xdc\r\xec\xbf\x95 \xed\xf2\xad\xe1\xdc?Ho\xda3\x90\xb0\xe8\xbf\xe7\xces\xec\xac\xb2\xe5\xbf\xa22\xf4\xef\xd9\x90\xd1?\x0bQ\x88[\x0f\x85\xc4?\xcbo\x8ak\x14\xec\xd7\xbf\xda:\x14\xcbf\xae\xee?\xad\xd8\xd8\x80H\xca\xe5\xbf\x9d\xf4\x97`k\x81\xd5?\xeaqz\\\x11\x1c\xeb\xbf\xf4\xf7\xbab[;\xe8?\x8b,\xe7\xce\x1c,\xe1?\xdf\x83\xa5iE\x16\xdc?R\xd1O\x99dn\xb8\xbf\xa6\xd8\xb1\xfa\xed\x0c\xe2\xbf\xb7e-\x9b\x0f\xb2\xde\xbf\t\x87\xec\xee\xcc\xb7\xe6\xbf\xfa\x01\x9a_\x08D\xd8?n;Q\xfb\xb4a\xf0?0\xa78\xa8\xf1\xfa\xda?\xb8\x96\x1e\x86\x85~\xed\xbf1\x15\xf8\xbb\x02\x01\xe2?\xc5D\x03L\xaf\x10\xdf\xbf\xaa\\\xda\xf2\x99V\xa8?\x19\xea\xdeb\xcd.\xe8?\x05\xba\x0f\x8e(-\xe3\xbf\xb7\xe2\x94\xc2K@\xe1\xbf\x90e\xc5\xc2Xx\xd2\xbf\x81\x84\x17\xdc\x89\xbf\xdd\xbf\x1dC\xba\x9a\x1c0\xd6\xbfI\xeb\xf0tnv\xeb?\xe8\xe5\xf3\x02\xef\xb9\xe4\xbfz?\xabs\xf9\xdd\xb2\xbf\x99\xca\xe4\xb8\xc3\x1e\xd4?\x95\xd6J\xc9\xae\x0f\xe0?\xd9m8CP\xba\xd1\xbf\tqB0%\xdf\xe7\xbfl\x1ae\xb5\xb3S\xee?\x83ln\xc4\xc8>\xda\xbf\xbb\xaewkmR\xea?\x87\xe5\x1dZAV\xd3\xbf\xcb\x7fk\xcd\xe4\x14\xda?+\x99\xc6v\x02\x15\xd6?T\x9a\x01\x87\xa7\xd2\xdb\xbf\xcf\xed\xc9\xf1\xdc\xe4\xca\xbf\xfeC\xf7\x166\xd1\xd1?jB\xc9\xb6\x80\x08\xcd\xbf\xa6j\xb7\xca\xce\xdf\xdc\xbfTE\x9a\x8a+\xc6\xba\xbf\xa9\xad[]\x93\xba\xc4\xbf\x95\xbb\xca\xbc4\xe4\xd6?g4\xcf\n\xffs\xb8\xbf\x12\x1c\x9e\x91\xb6g\xdb?\xd8\x07?\xf8\x94_\x92\xbf\x82?\xdfT:\x91\xb1\xbf\x0c\x18\x0e"\x16I\xfc?p\xdd\xef\xc8p\xdd\xea\xbf\'q\x0b;o\xba\xc1\xbf\xb1\x9c`\x90\xb4@\xa7?\x95\xbc\x9elTx\xe9?\x98\x0c\xc8{\x13q\xe1\xbf(Z]\x8a\xd9\x08\xe2?\xb8\x80rk\x0b\xc6\xdf\xbf\xc0-1\x89#(\xe6?\x95\x92"\xcf\xc2\xa7\xe5?\xbbq\xf6\x16Y\x89\xe3?\xfb\xec\x14\x96(\x8b\xbe\xbf\xe5\xce\x1dfG\x01\xd0?b\xe0a\x97\xed\xdf\xdb?\xea\x8a\xb6Q\xd5\xe4\xc8?Q)\xe1J\x07\xe3\xaf?U\x05\x08\xa2\x94\x91\xb5\xbf]\xd3n\x93\x10\xc8\xe1\xbf\x00[\x8a\xd3\x04\xa4\xc0?\xc8\xfa6\xfc0\xc2\xdc\xbf\x89\x1fM\xa3\xc3\x18\xc7\xbf\x92R\xfc~\x8b\xdd\x9a?\x8f!E\xa6S\x0c\xd0\xbf\xa1\xb0\xac\xa5\xfb\xa3\xe3\xbfV\xf4$r\x1f\xec\xe6\xbf\xaf\xd0O(R\xf8\xbf?_\x84NoZu\xe7\xbf\x19\xa2\xc2\x88sl\xcc?:U3\xfc\xaf\x1a\xd3?\xed\xc0\xf7N6\\\xb4\xbf\x08)\x99\xb7\xa1\xe3\xe8\xbf\xf6\x97\xafm\xf3\xc9\xe0?8\x14\t\xb8\xef\xe7\xaf\xbf\xc7\xa8\xb9A\xa1\x1e\xc6\xbfG\xe7\x18\xe3\xaf\xed\xa3\xbf\xd4H\x07\xaf1\xd1\xc7\xbfT\xff~\x1f(\xff\xe2\xbfW8\x895\x8c\xda\xc4?\xa3\x14G/\xba)\x99?H\xb74\xab\xe1\xe7\xe6\xbf`\xb5\x91\x14\xf4\x90\xda?]\xe7Z\xcf"\\\xf0?\xe7%R\xde\x03H\xc9\xbfO\x81\xadT\xc8\x80\xcd\xbf%\xd9\\J\x8bs\xd1?\x8d\xd9\x97\x052,\xe6\xbf\x94rR\xde\xad\xe9\xec\xbf^\xbd\xea\x92\xf1\xd9\x95\xbf\xde\xc2\x93\xc0\xf2\xf8\x93\xbf\xb7\xc4\x82\xaa\xa6\x93\xdb?N\x1c}\x01\xb5S\xbb\xbf\\\x92\xec\x9936\xd0\xbfc\xd3\xc9`\xea\xef\xd7\xbf,R\'\xa3\xe8`\xe0\xbf5XD\xd6\xdc\x96\xdf?M\xe9\xe3\x13J\x88\xe1\xbf9&0\x89##\xb1\xbff\xca\xfev\xf0\x89\xad?s%\xffB\x16\x0e\xc9\xbf\xff\xa9y\xa1\x9az\xb2\xbf\xf9\xe7J\xf3L\xde\xcd?\xd4\xaaE\xb4 B\xd8\xbfeR\x8f\x13Q\xd4\xeb\xbf\xe7I\x8b\x00\xea\x1b\xb0?*LG\x1e\x19\xa9\xd2\xbf\xb1\x9b)\xfe}\xbf\xda\xbf\xf9\x1bW\xc5\xc8\xcc\xd7\xbf\x90\xa1\xfaF\xee>\xda\xbf;"s5\xe46\xc8?\xc9\x13\xbd\x0f\x12\xe3\xd4\xbf\xb2\xda\xc4\x8b%\xd8\xca?^q\xa4\xab}^\xc4\xbf\x88\x9c0-\r\xf8\xe0\xbf4l\xc7\x96\xccm\xf2?\xefe\xf6<:{\xee?\xabS@|"P\xca\xbf*\xa7\t\xd8\xc1\xf8\xdc\xbf\xd8\xad\x92f&\xd6\xc2\xbf\xad\xa6\xa2Z\xd7\x8e\xec?L\xd1x\x16\xfdH\xd4\xbf\xa4z1\xc4\xab\x82\xf7?\xc7%\xd5c\xa0^\xe1?\xa6\xf93n\xa3g\xcf\xbf\xe2\xa8^\x8avy\xaf\xbfG\xf0\xbf\x98\xeb\r\xe6?\xcaA\x11d\xe7[\xde\xbf\xff\xc3\xa2U\xd2.\xe7\xbf\xbf\xf8\x06\x95\x1c\x14\xd6\xbf6J\'j\xa5\x88\xc9?\xd8\x95`\x0bp\x83\xd0?\xd2\xf7\xe6\xf5\x92\xed\xe9\xbfq`\x1c.t\t\xd1\xbf\xf8\xc9\xf65\xed\xbc\xe0\xbfu\xdd\xeb1a\xfa\xd3\xbfj0\xb2\x8f8\x96\xca?x\x01\xc1\x16\xa1\xf6\xe6\xbf\xb3\x92\x81\x13\x8d\x15\xe2\xbf\xdd\xfb!\xb4z6\xde\xbf{:^\xc8\xfau\xcc\xbf\xa8\x98\x8cOwi\xe5\xbf\x1c\xd4\x0c:\xf0\xe3\xd9\xbf\xf27\x8cl\xd4\x90\xec\xbf\xc07X\x8c\xc84\xdf\xbf\x01\xc0\x8e\x1bZ\xb0\x85\xbf\xbcAk)\x07\xa1\xed\xbf\xd8\xd8\xfed\xfcM\xe5\xbf\xaa\x12\xeb\x8a\x8a\x92\xee?HIN\x03\x8e\xea\xc3?\x9c\x1fA\xeb\x80\xe9\xf0\xbf\xaf\xcb8nI\xcd\xbb?\xb3\x13`T\xe3\x02\xb6?\xfb\xbf\xfc\x94\xf4\x8e\xef\xbfJ69HK\x05\xc0\xbf\xb5\xf1\x04l\xdfF\x01@D\xe1B\xab\xc7\xca\xa6?t\x82\t\xf9*\xd3\xe6?\xbf\xecA3ib\xfc?\xaa\x12/J\xb3\xae\xb3\xbf\x0b\xd9tm\xc1,\xeb\xbfQD\x8eb\x92 \xdd\xbfe\x9a\xe6\x8eP0\xd6\xbf=\'\x9e8`\xec\xe5\xbf\x1c"6\xfa\x94\xc8\xeb\xbf\x94\xeb\xde\x9c\x8e\xf7\xc7?e\x9fzVH\xde\xf8?\xce\xb7r\xb2\xd1c\xc8\xbfq\x84\xb2@\xf9B\xba\xbf#\r\xe0\xe1+]\xd4\xbf\x83\x13\xa8q\x8f\xf1\xeb\xbf\xfe%Q\xee\xa1\xab\xe6\xbfL\x07d\xd7\xcd\xb7\xc8\xbf\xc6\xd2\xa6\xe6f\xed\xd8\xbf\xa7m[\x83\xe8H\xeb\xbf\xa6\xad\xbd \x0e\xbc\xe6?\x98n;\xd4\x158\xe0?B\xaf\x11\xe3\x00\x7f\xe3?\xf8o\xf13nE\xe3?W\xcb\xd31\xf2\r\xda\xbf\xf5Se\x9d\x90\xab\xda\xbf #\xa4\'\xa6\x8d\x9f?,+\xd1\xf1y\x10\x02@MeT\xca\xf5^\xdd?\xfaR\x0c\xaa\xf3\xf6\xf3?\xab]\x12\x13\xdf-\xb2\xbf\xde\x0fI\x0bD\x11\xd0\xbfX\'\xe3\x90dY\xc4\xbf\xb6\x89BE\xa4{\xf0?\xd0*[H\xc6\xf5\xba\xbfV>\'\xcc\xa9\x0b\xd9?1\x9c\xb0\xa8ur\xe2\xbfs2\x85re\xb6\xc4?\xfe\x876~T\xd7\xa2?\xcf\x98I\xea\xdf\xa5\xe1\xbf\x05\xed\x8f\xd3N\xaa\xb8\xbf\xe5\x0c.\xd2\xb1\xb6\xea?G\xb9\xb5\x12\x87\xb2\xe9\xbf\x98\xdaV\x85\x10\xfe\xd4?\xe0`t\x86\xd1O\xd7\xbfw\xf7\xa3\xf4E\xd7\xc1?\xca\x80e%\xff\x84\xda?\xa0\x06-\x8a\xfd\xa9\xe8?"b\xb9\x01\xb0\xc1\xf8?\xbb8,e\xe0\x03\xe2?\x98\x84d\xb0Z \xea\xbfg\xad\xb4\x91\x14\xbc\xe8\xbf2\x84{\x0e\x870q\xbfv}\x02\x80\x9ag\xd8\xbf\xe0fMea\x8f\xe0\xbfV\xda\xfe\xcc\x7f{\xe3?L\x17\x87\x14\x13\xed\xe6\xbf\xbf\x07\xcf\x9cl\x07\xe6\xbf\xfc\x81\x85\xc7\x13\x1c\xc4\xbf\x01it\xa0G3\xe2\xbf"{\x1er?/\xe2\xbfUn\xb9\x9b:\xda\xd3\xbf\xcdsz\x0fx\xa4\xd3?Lo\xf9z`\xe9\xe5\xbf\xac\xa3P\x18\xf2\xf0\xb8?\xa0\xf6\xa9j\x95\x93\xe2\xbfKo\x8d\xca\x98\xa4\xdd\xbfao\xd8\x9e\xd1\xe2\xc4\xbf\xce#\xb1\xc5\xf9\xc4\xe6?\xa7Q\x83\xae\x08\x02\xd9\xbf\x87\x04\xfb\xdc\x8f\x18\xb8\xbf\xf6\xa1\x0f\xaf\x06\xe4\xd1\xbfgl\'W>^\xea\xbf\x00\xed\x98\x8c>T\xc8\xbfT`\xc6!\xd3(\xdc\xbf\x0b\x98 \xf4f\x0f\xc0\xbf\x17Gc\xeaR\x18\xc7\xbf\xca\x0c\x81w\'\x8a\xab?\xda\xae\xfd;\x91>b?\xa2\xfe\x02\xd4\xcbZ\xe5?l\x8b\xd0\x8a\x17I\xe5?\xd0\x8bxS\x13\xc1\x98\xbfG\xb5\xa0zF\xc1\xe6?\xaeH\xa2\xa8\xd0\xbc\xc6\xbf\xdbi\x0c\x89Bm\xdf\xbf\x1c\x02\xad\xca\xcc\x94\x8c\xbf\xd4y\xd6\xee\x83s\xab\xbf[\xcf?\x90\x8f\x06\xe1\xbf\xf5\xb6l^\xd3\x8e\xc8?\x9e\xc5\xfc\xc3\xca\x96\xce\xbft\x91kxi6\xe4\xbf\xee\xd3\xc4\xe2\x93\xf5\xe4\xbfW\x8e\xc9[:\xad\xc7?@\x8dZ\x18\xc5D\xe2?\x80\x90&h\xd7b\xe1\xbf\xc9&q_\x84T\xd1?FI\xbe\x92q1\xe8\xbf\xd7\x95y\x94\x01g\xe8\xbf\x1a|m\\]\xe9\xf0? \xc0\x8bY\x8e\x82\xdf\xbf\xc4\x97\x86\x0b\x8f<\xea?\x1d\xe0\xf7\xc0-\xd3\xdb?\xb6sH\xf9 \xa6\xeb?\x00\x00\x00\x00\x00\x00\xf8\xff\xc3\r.\x86_\xdb\xea\xbf\xa6\xfe\x1a\xde\xf1\x8d\xeb\xbf?\xf7\x90\x11\xad?\xe4\xbf$X\xc3J5;\xea\xbf\xb9\xa9PC\xbb\xab\xe9\xbf\xea\xd8\xacS\xd6<\xe4\xbf\x0f\xbc\xec0\xd5\xb6\xc3?zv\xc2pp\x9c\xda?g\x10\xed\x1f\xb7)\xd9?+\x81\xe1\xd8\x8fe\xcf?\xa4\x87p\xf9\xb5J\xbc\xbf@Or[\x90\xed\xc4?\x018j\xe5\xb8\xbb\xe4\xbf\xa2M\xfb\xca\x97a\xe4\xbft\xb6 Z\x8c\x0b\xe2\xbf\xf2&_B\x7f\'\xe8\xbf\'\xc3o\xe9\x90\x9c\xe7\xbf\r\x92\x0c\xab\xd1\xe6\xc3?|m\xa0K\xc6=\xc8?>"\xf6i4\xdb\xd4?\x160\xa3\xffY\xf0\xd0\xbf\xbe\x96\x16j\xf8\x9a\xdd\xbf\x96t\x87o\x10%\xcc\xbf\x08\x0c\xd4\xb1\x85V\xbe\xbf\xa6#\xc8@\xdd\xe6\xec\xbf\xb9\x0eC\xc6\xe4\xec\xe2?a\x84\x04\xd0`\xdf\xea\xbf\xfa\xcc\\\xf6\xf6\xb2\xc3\xbf\x95]\x1a\xd7/F\xe0\xbf\x82>0u"~\xd3\xbf\xb1\x89\xb3\xbdsm\xd1?}G\xecI\x84\xb8\xd4\xbf\xc8K\xd7\x80N\x01\xac\xbf\t\x0f\xf0t\xe3F\xcc?\x85\x98\x89\x98\xa1\x84\xc2?H\xebW\x9d\x13%\xb1\xbfw\xc7A\xb1%\xb3\xb6\xbf\xfd\x8b\xe1\x14\xaa\xd5\xaf\xbfE=]4\xd1\xaa\xe0\xbf\xfa\x85\xe5p:\xf7\xe4?\xdfRh\xbbl\xe6\xb7?\xfb5QW\x87\xe2\xdf\xbf>\x17\x95\xca;\xc0\xce?\xa1=\xd7\x94w@\xf1\xbfG\x01\xa1tW\xb2\xec?\x94\x0cP\xe2\x8a\xd1\xe5\xbf\xcf_[\xfb\xb4\x88\xe6\xbfk\xd9\x82\x10\x0f\x11\xcb\xbf\xcc\x86\xc3\xed ,\xc2?\xa8\xc5I\xd3\x05\x9b\xc2\xbf\xf6.&6\xce\xed\xe9\xbf`\x15\xfa\xcf}\xde\xe0\xbf\xc6e8\x0b\x1f\x9d\xd7\xbf\xb5\xa3}p\x98\xd5\x93?]\xfaV\xe6\xf1\xcc\xda\xbfE\xa0k\x07\x83\r\xdf?\xa2\xff\r\xf9cR\xd6\xbf\xeb\n\x13\x02\x12\x9f\xde\xbf\xfe\xb1\xfc\xc50E\xd7\xbf>\xdb2\x9d\x18\x15\xe0?\xecEA\xd5{m\xbb?\xad\xcaPq\xc3n\xe5\xbfS\xacL\x87b\x02\xe2\xbf\x86\xdc/\r\x92F\xd8\xbf\xac\n\x89`^o\xf6?M\xf2O\x9e\xe8\xf7\xba\xbf&\xbd?\x01\x9dF\xe9\xbfkX\xadt:\t\xe5\xbfp:\xeee\x0bq\x95\xbf\xd3\xb2\xc3\x8e\xdc\x11\xdc?\xc4\xc3R\xc1\xb3R\xe6?\x97\xd1\x985\xb9\x80\x00@?D\xb3m^\x9c\xde\xbf\xba\x9f!\x80B\x00\xdf?%nZH\xeb:\xe2\xbf\xa3\xf0\x96w\xdc\x8d\x00@1\xb79\xc9\xde\x08\x97\xbf``T\xd1\xa2@\xd3?*\x05\x0fP\xe5\xee\xca\xbf{\xf4\x9d\xf5\tq\xb0?oE\xaf\x9f\xef\xc4\xad?\xc0\x93\x95vk\x86\xb3?\'\xc5\xd9\xaa\x90~\xc1?\x9dP#\xa37I\xe3\xbfl@\x9eL\xe7\x8d\xf7?\xeeE\x7f\xb2Y\x8b\xe3\xbf\xdb\xd1U4X\x1a\xce?\xa46\xd0\xce\x88\xa7\xd8\xbf\xf6\xd4*\xd9"n\xe3?\x84\x9f.\xa3l\xc6\xe7?\x84u;\xb7\x11\xbf\xa7?\x8fY]"\xe5\x06\xd3\xbf\x92\xae\xe3\xff\x1b`\xc9\xbf\x04\x93A\x8bY\x97\xe8\xbf`?\xb3\xb0\xcb5\xcb\xbf\xbf\x06\x8b\x8f#\x7f\xdd?\xef/\x02\x18lz\xb2\xbf\x1a(\x8a|\xd5\xe2\xc4\xbf\xe7ouk\xb3x\xae?\xebo\xce\xb8h\xdd\xbc\xbfUS\xa9\xa0\'\x0e\xb9?\xc8\x17\xc5\xc4++\xe3\xbf\xdb\xe5\xdc\xd3(\x8d\xd1\xbf*VN]{\xe9\xb3\xbfX\x0c\x01\xa9}\x02\xd5?Z\xef_}\xee\x10\xe5?\xdd\xf9b\x90$\x87\xcd?{\x02K\x9c\x11\xbf\xd0?\xb8\xd3 -\xd9A\xdf\xbf%c\x9c\x92I\x05\xdc\xbf\xcd\xecN\x92m\x17\xeb?\xc14\xe1\xed\xde\xb2\xcc\xbf\xbc\x98`\\\xa4\xde\xe0\xbfn6s\xd4)\xcb\xc0\xbf\xee\x05\x9e,E(\xb3?H\xb5\xbfs\xc8\x88\xd1\xbf\x0cM\xef\xb3_\\\xe3\xbf\x06\xee\x0b>\xf6\xbb\xce\xbfP7\xc7t\x9e\x83\xc1\xbf&\xf0\xad\xf1 \x1b\xd9?\xb3\xf0N\x94\xbe\x80\xe6\xbf\xfb\xdb\x17\xfeTb\xe0\xbfS\xe9asrJ\xce\xbf7\xd4q\xd3\xb5\xa8\xe5?\xa4>\x8f\xda\xb7\x90\xd3?}\x03:R`U\xec\xbf\xd8\x1c\xef\xe5\x1e=\xe1?#?9&\x9c\xba\xf0\xbf\xb6\xa0\x89 KS\xe4\xbf\xeb\x06k.]\x16\xda\xbfA\xdf\xd8\xb0\x12\xc3\xd2?#\xa9Y#\x04\xc6\xc1\xbf8\x00 \xea\x98\xb5\xd2?\xb3FR\x819\xb0\xd0?\xde\xad\x1b\x03\xe54\xd1?\x17\x1b\x03^\\:\xc7\xbfW\xd6A\xb8\xf9\x0b\xd6\xbf\x0b8\xc4\xaaX\xa6\xe8\xbf\xda\xdclr_\x81\xf2\xbfRwE\xf6\x000\xde\xbf\xa0\xb3&\xee\xf9\xec\xb7\xbf\xb6\xcf\xfeP:\xb5\xb3\xbf\x1e\x8cP\xb7\xac(\xf5?\xa5]-\\Q\xff\xcf?U\x8cH\xd8\xda\x1e\xc0\xbf\x1a3<\x9a\xa0\xaf\xc3\xbf\x16\xd8\xd1\x9es\x81\xd2?\x88\xdc\xab7\xd0d\xe5\xbfa6\x14$v \xc7\xbf\x13c\xbf\xf7?\x93\xd4?\xde\xaa\x9a\xc4kr\xa0\xbf\x91\xa4\xcd0q\xfd\xbc\xbf\xe1_Wj\x12\x00\xf8?_g\xe5A\xc7\xea\xe4\xbfK\xe5h\xb0|\x1c\xf0\xbf\x0c\xc4\x83i/M\xea?W0\xe3\x8f.-\xe3\xbf\xe7\xe8\x95\x9b\xbf*\xf6?\xca\x1b\xee\xd5\x968\xd6\xbfc\xb3j3\xc0:\xe2\xbf\xbb\xbf\xfbcY\xbb\xd4\xbf\x941p]S\x00\x87?\xd32\xf3\x1a}\x8d\xd7\xbf\x8d\x05\xcf\x0c\x15\xb6\xde?\xdc\xc1\x90r\xab\\\xeb\xbf\x82\xb2t\xb4\xd9\xf9\xe4\xbf\xe4\x93>\xf2\x02\x7f\xc9\xbf9\xb6jA\x87\xc4\xa5\xbf\x99s\xa1z,`\xb7\xbf;(OE\xa7\x8f\xd4\xbf\xf9\x9c\xbf7}\x00\xe2\xbf\xaeVM\xf8\xb5\x93\xb7?\x86\x12\xc0\xe4\xbdb\xeb\xbf\xed%\x83Q\xa1d\xd8\xbf\xea\x01u\xa4!9\xe9?\xa0j:\xff?\xa8\xe3\xbf+\xb3j\x86\xd5\x84\xde\xbf\x8e*\xb0\x91\xad\x1a\xdc\xbft\x19\xa8h\xffB\xee\xbf\xf3Cdmk\xf5\xfe?`\xb7\x9bQ\xe3\xc2\xb5\xbf\x04\'\x18\x95\x84\xeb\xd8\xbf\xd5"\xc60\x9dg\xaf?X;\xba\xb7\xad%\xf5?\xf6\x94O8\x87y\xac?\xca\xb8\xf6\xc1\xdd\xf8\xdb?~Ez\x98.\x18\xc2\xbf\x0e\x04\xb2\xaa=\x85\xd5\xbf\xf0\xa4F\xc0h:\xc1?\xca<`\x9e\xfdL\xd3\xbf*q\xe0]\x13\xc2\xd8\xbf\x02L*K\xf1A\xea\xbf\x83\xdc^F\xf4\x8b\xcd\xbf*\x92\xbdD\xc7\x16\x89?\xb2\rA\x8f\xf0\xdf\xe4\xbf\x16\xc8P\xd2\x9a\xda\x9c\xbf\xecd\xc8\xb30>\xe5?\xc7h\xdd\xfd\x92:\xd6?x\x9f]W\xde\x87\xda\xbf\xbf|\xe8\x97\xbe\x1e\xc9?\xc5\x80c\xcd\x14o\xe1\xbf\xe5K\x08\x801$\xe2?\x07eyB\x9e\'\xdc\xbf\x00\x00\x00\x00\x00\x00\xf8\xff\x8d\xdf\xbe\xcbk\xbc\xbc?5\x0eu\x90\xf9\x1f\xc9?.T\x8fQ@\x91\xbe\xbf\x83\xcfb\xb7\xa50\xe5\xbfs\xa3\xca\xca\x0fM\x93\xbf\xd5\x0f\xe0\xf6\x937\xd9?l\x0cpv\xe6\x9a\xaa\xbfyAX\xf3?\xb5\xe5\xbf\xf7\t\xc4/\xb2V\xba\xbfV4\x16\x98:\xe8\xea\xbf\x92}\xe9\xf0X\xa0\xf0?\xc2\x15\xe1D\x8cv\xcc\xbf\x97\x07\xd4 \xf6\xf6\xe4?\xc7\xa0\x0f\xcc\xce.\xef?\x87\xbcB\xb2\xce\xf6\xc2?\xe6\xb3\xb5vD5\xc6?\xaaf\x1d\xaa)k\xaf?\x05e\x05\xeeu \xda\xbfqn\xb5\xba\x9d\xa1\xe2\xbfij\x89a\xcd\x97\xda\xbf\x1f^\xfd\xbb\x95I\xe6\xbf\xfeB\x8e\nW\xdb\xc0\xbf\xc6\xe5\x03.\x9d\xd0\xd0\xbf\xedL<i\x0c\xac\xd2?\x12<rT\xa3\xcd\xc3?\xad\xca^#\xad\x82\xb9?\xdb\r\x81r \xb1\xd3\xbfI\x07(9\x98\xb2\xe4\xbf\xb55\x9b\xaf\x91\x10\xeb?\x1d\xe7@l\xbaR\xd1\xbf02\x1b9\x06\x16\xe2\xbf\x00\\=\xc1\x12%\xc4?Kl OyZ\xfe?pr\xdf \xe7*\xef?\xb4\xef\x90\x9fy\x14\xda?\x87\xde\xea,\xd7\xe1\xda\xbf\x02\x14\xd7\x94\xb0S\xd2?\x1c\xa7\xcd\x04\xfa\x90\xd8\xbfN\x085\xbc\xc8y\xe4\xbf\xe9I\xc90;\x87\xdc\xbf\x18~L\xd4".\xc0?\'\xba\xebL\xb0\x1a\xe6\xbf9\r}\xfc\x12\x15\xe6?\x1eo\xef\x0c\x86\x10\xc9\xbf\x19\xca/\xe5jP\xe2?\xff\xa6X\n\xfa\xd0\xd6\xbfp\xe0\x8bl\x0ct\xe4?\xb3\xf3\xf24e\xb3\xd1\xbfgp\xe5\xb4\xc4\xd2\xf1?\xca\xd9\x19\x98\xd2\xf0\xb3?rgTC>\xfe\xe5\xbf\x85;\xf4u>\xcb\xe1\xbfq\xe3\xdc\xed\xf5\x1c\xed\xbfu\x18w\xcd\x9e$\xae?\x08\xad\x9bz\\\n\xf9?\x10\xc1\x13\x1e\xc5\xc1\xe2?\x8b\x96\xd9tL\x86\xe8\xbf\x0f\xde\x19?\xa3g\xf3?\xf4\'p\xaa \xc0\xda\xbf\x08\x8f\x04T\xd1\xa8\xe0?\x03\x02\xd6\xac;\x97\xd4\xbfk\xca\xd0#\x15G\xe3\xbf\x99(y\x03\x98b\xe0\xbfd\xab\xad\xb1Iu\xe9\xbfgo\x94\x85\xef\xc8\xe2\xbf`$\x16\xb1\x9f\xe1\xd2\xbf\xb9\x1a\xab\'*\x95\xd3?3U9w\xcbl\xd0\xbf9\xd9\x92\x85i\xe6\x8d\xbfA\xb7\xbb\xac\xfd%\xc0?}\xd2\x9a\x84jV\xe8?\xf3\xd3\x1d\xc3\xd3\x05\xd3\xbf\xb9\xd60\x8e,\x83\xea\xbf\xf5\xca\xf7n\xb6\xb5\xe7?\xf9\xc8\x1f\xb8[\xd9\xd5?@F\xaa\xe2c\xda\xe2\xbf\x83\xee\x8c\x06\x9e\x90\xd0\xbf\x7f\x15\x85\xbd\xef\x9b\xb2?! \xb6/2\x17\xc8?\x90M\xf3\xfb_s\xf0\xbfR\xfb\x8d\x85`H\x9e\xbf\xbe.m\xc7\xcd0\xe6?\xf54\xb7\x8e&\x86\xcd?\xe8\x8f\xccJ\x85r\xc0\xbfSB\x10\xb0Cr\xd3?\xcc\x13\x17\xba\xe3\xb1\xd7\xbf\xa6\xb2\x9e\x8bm\xf1\xd7?nHc5\x91\x88\xa3\xbf\x12\xc3\xdc\xceO\x18\xd7?d\xcb\xfb\t\xba\xcb\xe4\xbfL\x99\x02\xdc\x9b\xfd\xdb\xbf\xf4\xb9\x0b\x89\xe1(\xdb\xbf\xb4\x07\x0eS\xfcF\xef\xbfk\xf5\xe6\xa3\xf7\xa1\xe2\xbf\xd4M\xb0K\xa4\x1f\xb7\xbf\xb4\x1aV\xc78\xc2\xf2?\x08o\xbfV\xab\x13\xe2\xbf\x9d\x0b\r\xc8+\xce\xe5?\x02\\f\xbf\xdcA\xe0\xbf*\x1a\xa2$x\x8c\xde?\xaa\rc\x03Iw\xf5?\x7f\xfeU\x1d?S\xe3?\xee\xd6\xa74\x91#\xb7?\x08\xbf\x16\x8e\xc80\xc5\xbf\xc6\xcc&\x07\xf3\xe8|\xbfXK\x1f\xd0\xc7k\xc4?\xbf[\n]\x84q\xe2?\x90R\x8f\xbf\x89\xa4\xda\xbf\x9e?\xac\x9c\xac\x84\xe4?\x98\x12\x16\xd5O\x7f\xc6?\xc9\xe6\xb4\xff\xa2\x8e\xd0\xbf\x88l\xbd\x04J\xf1\xc2\xbf\xbd\xce\xde\xe9\x19p\xca?CW\xad>\xbb\x07\xde?Z\x81o\xa0CU\xe1\xbf\x05r\xd7\xf88\xe7\xee\xbf_\x03\xef\xbd\xf2\n\xe6?\x98\xa5\xc1\x00\x13Y\xe8\xbf\xce\xc3:C\xf9\x08\xd6\xbf\xe1\x15\xd6&\xdd\xae\xc5?\xe7\xdeP\x1c\x99\x96I?\xeed\xb5b\\\x86\xdf\xbf"\x8a\xfe\xd1i\xc5\xcc?\x9e\x05\xc13\xac\x92\xd2?g\x18\x85\xde)\xbd\xd2\xbf\xa3\xf7VZZ\xe3\xc0?1\x99\x1c6\xd3\xa8\x02@\xf5\xa0\r\xd8\x06\x85\xe8\xbf9N\x84Z\xe0_\xd3?\xf9\xb4,\x15X\x9a\xc4?\xe5\xf27\xb7{\xef\xe6\xbf/)0\x1e@C\xd8?\xb5\x93\xe2<\x85\xb8\xd6?\xea\xbd\xa6qa\xfd\xd1\xbfY\xe8\x9c\x9b\xa6\xcf\xd5?\n\x05\xb6\xd7\x04\r\xaa\xbf\xad?]\x18y\x97\xe8\xbf\x0c/\xbf\x00[\x99\xe0\xbf\xa5q\xe9nS\xb8\xdb\xbf~\xa5=\'\x19\x06\xc1\xbf\x92\x88\xbf\xde\xf6\x1e\xc0?y.\xa2\xcc\xb0\\\xa8\xbf)&\x94Cw\x99\xdb\xbf\xdf!O\x8a\xe6\x86\xdd\xbf\x1f\xd5:\xc4O\xd3\xd2\xbf\x838\xe0\x7f0\xad\xe3\xbf\xadv\x98J\xdd?\xe1\xbfU\xaa\xc9\xd4\xf5\xde\xd2?uI\xb74\xed"\xa6\xbf\xd6\xc1Si\xa4\x91\xc3\xbf\xd5-K\xd2{p\xb8\xbf\xd3\xb8\xd2}\\\x93\xd4\xbf\xa6r\xd7\xe4\xdd\x84\xe6\xbf\xdf\x9bu i\xf2\xea\xbfQS\xd7\xc2H\x0f\x92?{\xdd\xbf\xd9\xa1w\xf1?\x9b\xdd\x04b\x04 \xe1\xbfM43\x0c\x7f\xbd\xc4\xbf>\xd8\x86\xf6`\xa8\xd6\xbf%\xdc\xa3o\xd8:\xd9?\xdc\x9b\xc9\x9dX\xab\xdc\xbf)z\xb7R\x02\x0b\xda?\xcc\x84\xec\x90|\xa1\xca\xbf\x11\xb0l\xcfD\t\xed\xbfm\xe4\x06\xd5\x87?\xef?`41\x0fK4\xd4?\xe2\xd6\xbb\x891\x1e\xf4?m\xcc\xd3\xcbs\xb8\xde\xbf\xf7\xde\x14$\x80&\xb9\xbf_\xeeQ\x03.\x91\xe2?\xa3\x03\x8a\xcf\xfa\x80\xdf\xbf\xe2H\xd8\x87\x8d\xf3\xe9?l\x0b;I\x9a\xfe\xcd?\xe5Y\xa9\xfa(\xa5\xe1\xbf\xb0c\xb3)\xab\xd8\xee?\xec\x81\x90Ca\x1d\xe0?\xcf.\x03\xcc~4\xde\xbf\xc2\xed\xc2\x87\xca\xc2\xe4\xbf\xb7\xf0c\x9b\xee_\xe1\xbf\x18\xceK\x83\xe9L\xce\xbfY\x8bH!Y\xc5\x9c?\xf2\xe9yh\xd0\xa1\xe8\xbf\xc3\x15\xfa\r\xa2\xff\xd6\xbf\xb3/\xb4\xf0Rj\xde\xbf\x08f8*\x0b\x84\xdc\xbf\xa6!*{\xd4\xc0\xc5\xbf\x96F~Hy\x9f\xea\xbf[\xab^G\x91k\xd5\xbf\x8d\xa05\x8cE\xe3\xe0\xbf\x16f\xa6\xc9\xe0z\xda\xbf\xd5\x97ZH]\xea\xec\xbfM=\xcb\xc32k\x96?\xb5Phu\x9f\x91\xea\xbf\x91\xb2\xa7\xaf\x81\x9e\xf2\xbf\x9d\x99\xe0\xa6\x02\x85\x9e?^\xe6\x87\x8b\x1a\xa6\xe6\xbf\xaf\x86\x0e\x07\xf8\xcd\xd4\xbf4q\x86\x02\xc0\xcb\xe1?\x01\xcbP\xf0\x91d\xe8?\x08:\xeah\xd1/\xf1\xbf\xc9\xb6\xc5\x89\x10\\\xc6\xbf2A#o\x9e\x0c\xd2\xbf\x89\xf8\x19\x0c\xdd\x07\xeb\xbf\xa4\x0f\xa6\x95{\xf8\xd3\xbfp\xd9);\x10\t\xf0?\xeb\xce\x00\xa2\xc7\x04\xb5?\xcc\x93\nF\x11K\xf5?\x1dx\x0cC\xf8\x8b\xf1?9\xdd>\x0f\x9a\xe8\xdc\xbf\xabU\x04\xe4\xbbt\xe8\xbf(Zr\xa4\xff\xb4\xe5\xbf\xc7\xfa\xd5\x12\xb6\x7f\xd5\xbf\x11Z\xe2\x93\x97Q\xa6?\x8c\x18&\x83k\xd9\xef\xbf\xf5\xebP\xa1D!u?\xcc}\xc5k\xd4\xe2\xf6?\xd0\xa6\x9e\xce\x08\xc7\xc7\xbf\\\xc9[x\x95\x94\xb7?\xb4\xc8\xae\x17\xd8\x0f\xa8?\xecnY\x14z\x1b\xee\xbfl\xf42IW{\xe6\xbf\'\x05\xca\x13C\x13\xcb\xbf\x82\x07\xc8=\x12\xda\xd6\xbf\n\xf6X\x1d*\xa5\xe0\xbf\xfc\xba>\x81L\x05\xfa?&\xe4\xac\xb2\x9c8\x9c?\xb0\x06\x17\x12\x82<\xa4?Q\xb0t\xa01\xb0\x9c\xbfwq\xdc\x8cc\xbe\xca?QR\xd3\xe2\x92\xd7\xe2\xbf\x9c\xa4\xa6.}c\xb4?L\x92\x07\xd9,X\xdd\xbf\xc2\xec3\xcd\xf4j\xd7?\xd5].\xd9\xddp\xe5?8\x05\xb7\xae8\xf1\xa5\xbf\xf3\xa50\xf5\xd2\xd2\xd0\xbf\x16\xea9\xfau\xb6\xca\xbfb\xfc\xa4\xc7\xda.\xf2?P\\\xcc\xe1\x06r\x9b?\xa5lpj\xb8\xb7\xf9?=>\x00\xe3$\x7f\xd0\xbf\xd0\xdc\xbaX\x1c2\xb7\xbf\x97\xf6U1-N\xe3\xbf\xd7_\x90\xf6#E\xef\xbf\xc6\x9f\xca\xd2\xdeR\xd8\xbf#j\x8d\xa0Q\x9a\xd6?\x16\xabL\xe9\r \xd5\xbf3\xfd>\xbc\xb6\xfa\xe1\xbf\xea}\\A\xc1\xa8\xdc\xbf({`\tt\x0e\xe8\xbf\xdc\xf7\x81\xe9j\x14\xbc?\xdfz\xe2\xa0\x87\xd7\xe1?\xa0\xe4+\xb3\x17\xad\xf1?\x9f\xdb\xa6\xe1\x82:\x84?\x00\xb2\xea\xcd\xd3 \xe9\xbf@\xebN\x1c\xde\xda\xe9\xbf\xcc\x92\x1d\x8b]9\xce\xbf\xdc\x1c\xdb\xc0(\xed\xd4\xbf\xca\xf79\x1f\xe3\xe8\xe1\xbf\x08\x0b\xd1f/\xd4\xd6\xbfA\'\xcdp\xb0}\xe7\xbf\xc3\x12\x13-\x83\t\xe5\xbf\xda\xe8\xde3 \x98\xd0\xbf\x0c \xfc+\xf7\x90\xd2\xbfxF\x8ei8X\xe5\xbfg\x96\x02-B\x98\xe1\xbf>\x98\xe4\xe3\xc1l\xc6\xbf2\xbd\xee\xa5\xed\xa7\xdc\xbf\xd2\x16\x94\x028\xa9\xa1\xbf\xe0\x06\xa1\x9e\x8f(\xe3\xbf\x83\x98\xd1\x93o\xc2\xd3\xbf=\xe7\x1e\xaf\xac`\xca\xbf;_\xf2z)\x07\xc9?a\xea \xdf\xf6\x17g\xbf\x17\xe3\x0fA\'\x03\xc5\xbf\x81,~\xae\xb6\x11\xc3\xbfQ\xfb\xdb\xfe\xc35\xeb\xbf\x8f~\xad\x04\xb4_\xd1\xbf\x05\xde\x1dy\xa6]\xec?\xf9\x01\xd9=\xb4x\xdc\xbfe\xban\xc2\x14\xa2\xe7\xbfC\x03\xd0\x1aF\x11\xd7?\x8dC\xc1\x82\x80u\xea?\n\xe7\xe3\xd4\xd3\x10\xcd?\xb7C\x1f\xb7b\x1e\xcf\xbf,\x16k\xf8\xea\xf6\xe1\xbf\xe8+f\x00\x9b/\xc4\xbfn\xbc\xearWw\xcd\xbf\x1e\xadG\xc0\xc4d\xc3\xbff\xbb\x89\xe8\xaf\xc3k\xbf\xb4\xb1\xde\xeb\xe6#\xe0\xbf\x9dS\x1e\xee \x91\xe0\xbf$\xf2\x0e\x81I\xb3\xbb\xbfk\xd1=\x88\x19\x92\xe4\xbf\xf8d\xec\xc0\x952\xe4\xbf\xca\xbc{\xf9q\xd1\xec\xbf3B\xfa\xe0\x92*\xd3?R\x16\xc6G\xcd\x05\xe6?\x91z\x9f\xb5|a\xd2\xbf\xcb\x97b\x0b\xa3q\xc7?\xf8\x8c\xde;\x8c\xff\x97\xbf\xf5\xac\x02\xc6\xf9\x0f\xee\xbf\x8f\xac\xb3L\xee\x81\xf3?|fW*E\xa2\xdf\xbf\xb1\xcb\xe4`\x1f4\xe2?\x15\x8a8\t\x94g\xac\xbfH\xd0Pi\xd0\x93\xca?\x00\x00\x00\x00\x00\x00\xf8\xffT\xa2\xb8\x1b\xf9\xc5\xe7\xbf\xfa>1R\xe9\xc6\xe0\xbf\xb4\xa7\x01@2\xb1\xec\xbfI!\x8e6\xcc\x8b\xe8\xbf\x99HG\xadYp\xed\xbf\xd0\xe6?\x17\xd3=\xea\xbf\xe4a|@\x9bo\xb9\xbf\xc5\xccK\xeb\x03\xc0\xb2\xbf\xd2\xf0\xc5\x18\x17\x9c\xd9?\x1d\x98\xdc\x8ao\xd8\xdc?\x03\xb0\x1f\x83P<\xca\xbf5g\xc8\x1d\x0b\xb4\xb1\xbf\xc6\xeb\x90\x02J\xac\xe9\xbfs\xae0#.\xdc\xd9\xbf\xcd\x05X@\xff\x9a\xe1\xbf\x1b\xd7\'\xf0\xe6\x83\xe9\xbf\xf47\xa1\x86\xafu\xe3\xbfr\x87\\\x05k\x9c\xd5?h\x0f\x0c\xe8\x140\xe7\xbf$\xc9Ag\xb9\xa1\xe9?i\x9e;\xcf\xec\xc5\xda\xbf\rY\xf3\x1f\x10\xb4\xdd\xbf\xd2\xc1?}]\x9d\xe2\xbf\x02\xb9\xa5t\x8a\x00\xcd\xbf\xe4H.#\xd9$\xec\xbfT\xea\xff/n\xe7\x00@\xf0\xe3\x97V]k\xe4\xbf\xf6,a\xfd\x95,\xd8?\xb6g\xdbC=\xcc\xd0\xbf2A\xb4CR-\xe2\xbf-\xe4C(\xa4-\xd5\xbfovy\x11\xa7\xa5\xcb\xbfPS\xa1N\x11u\xc1?0\xf2o|\x8d\x84\xcb?\xb8\xd8\x1c\x9b\xcf\xea\xd0\xbf\x15\x1d%\xfaX[\xad?\xf2\x0bb\xb7\x95\x0f\xcc\xbf.VL@e\xab\xdb?\x8as9r\xf7\xbe\xd3?\x17\xd8\x07\xc2~&\xe6?W\xd4\xfd_\xc0d\xc4?]W{\xe0\xf6\xa2\xe1\xbf\xa6\x0brw{\x16\xd3?z!Q\x01U2\xe8\xbf\xe8\xc7\xf2\xc729\xda?\x84x\xf9\xb3K\xa4\xdd\xbfd\xa7\xd9\xcd\xf0\xc0\xe3\xbfcJ\x1ew|\xc5\xcb\xbf\xd6\n\xd0\xc1\x94i\xe4?\xdfu8\x8e\xf0\xd5\xd2\xbfT\xbe\xec\xe2\xf8\xac\xea\xbfg\xfd\xd0N4E\xe4\xbf=\x1bAM1\x05\xcd\xbf\xecj\x10\xfa;\xbb\xe2?Hf\x12M\xa6\xe9\xd0\xbf\x12m\xbe\xe3_\xb1\xce?\x02|\xc4\xb18\xff\xb3\xbf\xec\xdd\xd9\xf3\x94?\xd8\xbf[no\xeb\x9fA\xcc\xbf\x1b\xec\x97\x0c\xe2\x14\xde?\xb4\x1f\x06wWF\xa4?\x0c\x1f\x8e\xc8\xe2\x18\xcc\xbf\xfe\xad\x0c?\xa2s\xe0\xbf`\xfc\xe5FV\xaf\xb4\xbf\xc4\x1b_\xf98M\xe3\xbf\xa9o\x04\x08\xfc\xeb\xe7?\xdf\x88<\xf8\xc3\xea\xe4\xbf\xc0\xe4\x0b\xea\xdaW\xef\xbf \xba$]C\xeb\xda\xbf\xf7\nY\x86\x05\x9d\xd6?\xc0\x8ek\xb6\xb4\xaf\xf0?\x9dJ\xef\xcc=\xaf\xe8\xbf_\x91\xbe#q0\xe5\xbf!\xf2zm\xcev\xd7?]\x86\xa2^\xa1\xfb\xe4\xbf0&]\\\xe1R\xf1?\xb31\xf2\xc9\x044\xc3\xbfIl\x02\xaeBk\xe6?\xf7YL\x8b\xba\xb4\xc7\xbf\x9fU\xa0\x93Vn\xdc\xbf\xeb\n\x16\xd5\xa9\x14\xb8\xbf>\xd8\x8ez>-\xdf?\xabS\x89:\x170\xe7\xbf\xb0\xd9\x8f\xf8\xdd\xff\xe7\xbfr\x0f\x04\xcc\x94\xb0\xc1?\xb8\xf7\r\x96\xeb\x99\xe3\xbf\xd1\xf5I\x0f.,\x88?)\x1av\x8d\x94)\xe2\xbf\xbdh\x04\xb3I\xd7\xe7\xbf\xc9\xde\xc1;w\xac\xe6?\x05*\xea\x82\x084\xdd?\xb0.kN\xc54\x8d\xbfCB\x04+U\xe7\xbb?.D\xc8K"u\xeb\xbfIf\xc8k\x1f\x9b\xc0\xbf\x9d\x83>\xa9\\h\xeb?\r\xab\x1f\x19s\xe5\xe3\xbf\xf5\x08\r_\xc4\xa9\xd0\xbf\xfe\x12\xd6\x18~\x07\xd3\xbf\xa2I\x95\xc2Q\xf4\x89?O\x1d\xcf\xf3\x7f\xda\x8a?KZI/Kq\xe1\xbf|\xc9\x8b:>{\xb8\xbf\xef\xa7\xb4k\xa5g\xe4?|?\xcb=\xf6\x93\xe0\xbf\xefRu\xd6\xefM\xfb?\xdfDF[\xaf\x1e\xd3?\n?_\xcbX\xad\xd5\xbfJ\x14|*\x0eS\xf9?\x17\xdd\xf0\xcfGq\xda\xbf\x10\x88\xdb\x83\x9e\xc5\xf8?\x955\xf2S{\xf9\xab?\xb7g\x9fhY\x0e\xe1\xbf\xdc\xbdp\xe4\x8aS\xb0?\xf1^C\xbc\xdd[\xce\xbf\xca\xbd\xaaN!C\xc0?\xdd\xfa\xbc\xb7Q\xef\xc2?\x99\x985\x1b\x87\x0b\xb8\xbf\x7f7\x15\xad\xe7\xd5\xcc?\xff`\xbc\xd1\x1f\x18\xd7?;-~\x18t\xef\xe9?\x9a\x97c\xfeQ&\xbe\xbf D\xa2\xa3\xfeY\xc3\xbf\'\xa0\x80\xa98\t\xf1?\xee\x01\x81`Z\x8f\xda\xbf@vs\x07\x90M\xe0\xbf\xee\xc8\xad\xfa\x8bV\xad?\xe7\x9b\xf7\x85CK\xe3\xbf\xb1\x91\xc4eEC\xe5\xbf\xd6j\xc1W\x7fw\xa8\xbf\x0c\xdf\x0ey\x00\xc4\xda\xbf>\xd8\xc5\xb5\x83=\xe4\xbf<\xab\xb2\xe4\x84\x0f\xd1\xbf\x9b\xa6\x00\xaf\x064\xbe\xbfVn\xf1\xaf\xb3i\xc3?&\xe4.\xdc\xa4\x19\xa8?\xe6\xfc\xd4e\xd3~\xcc\xbf\xd3\xe9\xdd\x92\xa3\xa7\xe7\xbf\xb7\x06\xe8\x81\xcd\xf2\xe1\xbf~\xbd\xef\t}\x1b\xe3?j\xa43\xa5\xf6\x9f\xc2?\xea\xf4Vh\x0f\xdc\xea?\xd9J\xf6\xfcn\x0f\xe1?\x07n\x11o\xd2\xcb\xc7?\xc4\x90\xe47y\xbe\xd4\xbf\xc8\x7f\\\'\x91P\xd3\xbf\x90\xa4\x17`\xa0\x1b\xbf?\xa6\xab\x9c\x9d%\xa1\xd3\xbf\xdb^R\xe0\xa4\x85\xe1\xbf\x90ROe\x90\x83\xe9?I\xc4\x92\xc7=\xb5\xd1\xbf\x95\x9f$\x10\xef\xb1\xc5\xbf}$\x99\x88\xe9\xf7\xe1?\xc0\x19[%kE\xe4\xbf\xb6\xebh\xb2B\xc8\xd3\xbfP1D\xcf+\x17\xa5\xbf\xce\xe4\xd5\x13\x11\x1d\xb9?q\x1c\xbe\xc4\xb6\xa4\xd4\xbf\x9b\x8e$\x9c\x1aa\xd9\xbfW\t\x19\xb4\x1a\xb1\xd0\xbf\xba.cv\xc7\xfd\xe4\xbf+wb!\xd8\x88\xff?\xd5\x7f\xd6\xf3\xc1\x97\xc3\xbf\xe6\x83k\xb2%\x1d\xd0?\xd5\x05\xbc\x0c\x99T\xe9\xbf\xa2\x9cS\xe7\x94\xcd\xd8\xbfv\x7f\x04\xaasQ\xc5\xbf\xf6\x9d\x93\xfd\xe78\xbb?\x8d\xcd}n\x08\x01\xb0?\x16VEm\xd4)\xc4\xbf7\xd6\no\xec\xd4\xe1\xbf\x81\x90k\xd8\x13\xa9\x7f\xbf\xd1\xe1Z*\xc5\x94\xe7\xbf\xd3\xcec\xe3\x91\x9f\xd6\xbfxB\xdf\\\x8d%\xcb\xbfm\x064\xf7\x9eM\xb8?\xa8\xd3\xca\xb7\xa8|\x9b\xbfx\xf0P\x18\x813\xe4\xbf\x10\x96\xb4\x03\x8b\xfd\xce\xbf\x8b\x10!\x089\xcd\xea?\x197\xae\xbf\x9e\xd5\xe7?\']\x80[\x80\x9f\xde\xbf\x10\xeb\xfa`\xe6M\xe3?\x1di0\x8f\x9f\x96\xd3?\x9c\\\xb0\xa3\n\xc9\xc1?\x0f\xfd8p\x9d\x9d\xe1\xbf?\x97;\xa3\xc5$\xd5\xbf\xd4\xc0\x1c\xfc\xd1\x0b\xdc?t\x1d\x8c\x87i\x10\xd5\xbf\x11\x1e\x98\xc4\xd4\xdc\xc5?c\x99s9>4\xcf\xbf\xdf\x17\x0cc\xa5\x81\xf0\xbf|\x8b\x8c\xfdA\xa4\xd5?\xc2J\x81\x8c-w\xe9?6\xb6\xc2\x8d\x92\x83\xda\xbfM\xa7\xc4\x80g\x15\xe1?%w\x11\xf1Tm\xe5?\xe4\xe8\xa8\xc8\xea\x12\xce?\xce/\xd9\x8a\x81\x95\xe3?\x97\t\x14B0\xfc\xaa?02n\xda\r\x11\xe1\xbf\x15\xd7_(\xd3{\xcc?R\xd6\x1b\xe8\x1b\xaf\xd8\xbf\x00\x00\x00\x00\x00\x00\xf8\xff\r$[,\xe4\x97\xc5\xbf\xe2C\x88\xc4\x1c}\xba\xbf1\xcb_\xbd\x14\xb1\x92\xbf\xccY\x86\xed9\x9b\xdd\xbf_,\x03TE\xac\xe4?\xf6\x8aV\x1b\x96\x1d\xc6?\xf3\x98G\xa0\x1d\xb3\xca\xbf\xb5\x05\xb8\xb3w]\xd2\xbfh\xa2\x8eE\xe7j\xd7\xbfJ\x85\xab\xa1\x8c\x03\xe4\xbf\xe6\x9a\xff\x83C\x95\xe3\xbf\x15\x10\xb1lh\x84\xc1\xbfs]{\xc2do\xf3?\x92P\x97\xcd\x01Q\xc9\xbf\x10E$\\\xe1\xc0\xd2?\xffM\x9bc\x1f\x83\xd7?\x16g\xf2\x15\xf6\xb8\xc8?w\xfa\x087f\xcd\xb7?\xb5\xb2\xf3\xa1\xd3"\xe3\xbf\x90\x19t#\\X\xab\xbf`\x82\x88U\xbf\xc8\xe5\xbf\x96\xd95\xc7\x91\x8e\xc8\xbfIK\xd0\x8d\xfbx\xc5\xbf2H\x90\n_\xf0\xc6\xbf\xcf+*]\xdd\xfa\xe6?\xbe\xa9\xe2~6\xe8\x90?x@\xeeN%B\xc4?\x11P\x10c\xd7\xd2\xd1\xbfB\xe9\xea\x0c\x9f\xd0\xa7\xbf\xf5\x1e\x1c%6\xe4\xd4\xbf0\n\xa3\xb6Ur\xdc\xbfkT~)\xfb?\xe1?)\xaa\xf7\xb4\'\xa5\xf3?\xa0\x1d\xa2W\xdb\x8a\xdb?$\t\xbc\xb2\x90\x96\xc2?\xe0\x8fG\xd8<\xcb\xe1?Og\x12%\xf1\xbb\xd9\xbf#\x108\xac\xe4`\xeb?hxP\x81\x07\xad\xd1\xbf\xf0\xdf\x01\xea\x87&\xb2\xbf\xb1\x85\x89k\x88\x08\xdc\xbf4\x0b\xff"]\xa4\xe4\xbf\xff\xea0FEq\xcd?^\xca\xc4\x9bC\x90\xfd?\xbb\x98\x10\xd9o\x1b\xe7?x\\r\x90\x89\x99\xdc?\xc0>\xef\xd0\xd5}\xe4?z\xa4~=(\xcd\xe0\xbf\xfd>+8\xb6\t\xb9?\x80C\xde\xfe|\xc8\xc4?qk\xd7[\xb14\xe0\xbfv\x8f5\x14\x9b\xcb\xe3\xbfq\x05\x06$)\x1b\xdc\xbfM\xfd \xf0\x9b\r\xe6\xbf\x84\xd2L]\xd8\xbb\xcd\xbf\x1c\xc6\xc5Cx\x9b\xcd\xbf=\xc9)\xbb\xba*\xb0\xbf\x13\xd3\xf0A\x85\x1c\xea?\x93\x18R\x17O\xc4\xc5\xbfn:\x91X\xec\xd9\xe7?{\x8c\xdb\x84\xc5y\xdb\xbf+]*CW\xde\xe1\xbf\xe7\xb1Oo\xb5Z\xdc\xbf\x86\xa2\x05!EU\xd1\xbf\xdfd\xe6\x1c\xb2\x01\xc8\xbf9\xdcY\x0b\xfd\xf9\xc9\xbf(\xcex\xbd-K\xcb\xbf\xfa\xc8\xde\xeeF\xe1\xac\xbf\xf2\xc0\x9d/\xc7\x9c\x92?\xc2\xf3\xeaB\x1bE\xb9?d\x17\xb5ue\xb6\xd1?^4\xdf\xf3E\xb3\xd4\xbf\x85h\xc2*\xf9\xf1\xd2?\xb46\xf9\xdb\xd6\x0f\xe0?\xae\r\xbbL\r\xf2\xf7?Xe]\x17v\xb1\xe3\xbf\x88\x16qqt\xd8\xbc\xbf\xe8\r\xeaa\xf3Bq\xbfm\xa7\x1e\x98\xeaX\xcc\xbf\x1c\xdf\x1cg`M\xe1\xbf\x94:\x0f\x1bdU\xbb?\x1e3\xb1\x1d\xff\xce\xd9?#+\xda\x1c\x1b\xfa\xc1\xbf\xf1Ex\xb5\xb9\xd8w?\xfe"\x1f\xbf\xcd\x96\xc0?\x82\xb8n\x8b\x04K\xd8\xbf\xe5\x8a\x80a\x18\xf8\xe3?s%\xc1\xdf\x92b\xf0?\xf1\xcb\x1d"\xc4f\x9e\xbf\'\xe0(\xc1ZC\xe5\xbf~\xa5\xb0A\xfd\x18\xe2?H5yKi\xb7\xe6\xbf\x7f\xbc\xd6\xab\xe5\xd0\xe6\xbf=\xc3Fu\x0b\x14\xc9\xbf\xffj\xaf\xb52u\xa7\xbf\xd3\xf1\xa5n\xe3\x06\xeb?\r\xe5\xcd\x8a?\xbb\xe1\xbf\xca\xfd\x84\xda\x96\xd0\xaf?\xe3#+\xfc\xa5\x98\xd4\xbf\x9a\x82\'A\xeaW\xd9?u\x03\xff1\xf5\xdc\xe1?\x1bfBQ\xdd\xb8\xb7?Z^Swq\x06\x93\xbf\xeb)\x90<\xf3\xf4\xc7\xbfBw\x1bq\xe4a\xe6?\n\xb2\xae\x05f\xbc\xa5?\xbc\x0c\x94&\xb7\xe7\x96?*4\x97\x90\xefx\xde\xbf8|\xac\xf3\x14l\xdd?\x14\xa5\x1b\x9dk!\xa4?w5\xd5U0r\xcb\xbfdEj)8\x0b\xbf\xbf\xfc\xb4B\xfbnN\xf2?\x05N>\x96\x8c\xde\xfa?\xc6\xe8y\xbfT\xab\xea?\xcc\xa9\xc3\xdc\x8dQ\xba?9\xc2\xbb$\xf5\x0c\xdf\xbfH\xbe\x12n\x00\xdc\xce\xbfLl\xd8\xe9h|\xb7\xbfn\x7f\xfdk:c\xc1?#!|\xe0K4\xc5\xbf\xa5;\x98v5\x08\xdf?\x91q\\\x9a-\xdb\xd0\xbf\x0f]50\xbe}\xd6?95\xb3\xa0\x99:\xb7?u*\x0e\x98+\xcc\xcf?\x11\xf6\x14(\x93\xc0\xb0\xbf\xf5\x0b\xdc\xde\xa7q\xd2\xbf\x87\xd0\xc4\xaf\xcf\x85\xd5\xbf1\x84\xa3-Y\xa6\xd8?\xfe\x1b\x8e\xd5;~\xd6\xbf\x19 #:a/\xd6\xbf\x9fTx\x19\x12\xf2\xd6?\xea\xbd\xa6qa\xfd\xd1\xbfy\x9c\xf0\x9d\xa0\xfb\xf6?8\xb7\xa0e\x18\x01\xbe\xbf+\x02pE\xae\xd6\xd9\xbf\x99<\xbahe,\xb6?\x1bya\x06\xa7j\xbb\xbf\xf7yY\x81\xe4.\xd5?\x9c\x89\x8c\x03s\xd9\xe6\xbf\xbf!\xaa\xc51\xb8\xc2?,\xa5\xc0UD\x97\xe0\xbf\xd2\xd81\x13D@\xdb\xbf\x83\x85]m\x95\xc2\xdd\xbf\xdb0\x1cVe\x82\x87\xbf\xf6\x9e\xb2\xadc\x81\xd2?\xce\x01\xe9s\x9f\xc2\xd4\xbf\xd3\x81\x1f\xbf\x96\xd7\xc3?\xd0\xdf3T\xcb\xe2\xd2?\xb2/D0;-\xcb?C\x84\xd7\x83=8\xad?\x8ad\x10\xdb\xf2{\xe3\xbf\x82\x16\xa4\x08\xcd\x90\xc8?-\x9f=\xa6\x12\xf4\xd5\xbf\xc5>+\x08\xaa\xd1\xf0?\xad\xb4\x80\xf1\xaa\x93\xee?[\xabP\x10\xc1\xb6\xe4?Y\xf5\xe8\x97\x7f\xde\xe1??}\xaa-\xaaY\xae\xbf(\x8aM$$\n\x8c\xbf\xee\x96\x86\x10\xee\x0c\xe1?\x9dP\xab\xe9)\xf4\xd8?\xff3\x81\xb5\xc2r\xa5\xbf\x89\x16/\xbb\xb8\x9c\xe1\xbf\xfffg\x183\x0f\xcb\xbf\xbdN6\\\xc2\xe3\xef\xbf\xac\'u?9\x1d\xd8\xbfIV\x1a\xab\x00\xad\xb1?\xaf,\x9f\xf0e\x08\xd3\xbf|tG>\x83\x13\xb5\xbf[\x99\x19\xeay\x80\x9e\xbf\xa5\x9f\xf0$~V\xca?\xc6\x84Q\xa2\x18&\xe4\xbfv~`\xa1\xd3K\xf1?d\xe9\xd6\xfd\xdb3\xcb?v\xd1\xc7\xe5\xc9\xfc\xa4\xbf\xa6\x87\xf5\xbb\xc7\x17\xd3\xbf\xacQ\xe6\x1b\xa4\xb8\xc2\xbf\xc0\x1f\xc3\xec\xb7\x1e\xa4\xbf\xcf\xd0B\x1f\x1b\xe7\xdc\xbf\xbbu:\x10\x94V\xd9?%\xb1_\xc5PC\xe1\xbf\xb7\x1c\xf4\x14\xda\x02\xd5\xbf\x00\xd8\x01?\x9e\x99\xdc\xbf\x04\x8b\xcf}\xf0.\xcc\xbf\xadj\xb9\xa8\xaf3\xe3\xbf\xab\x96\xb3\xfd\xdc\x8f\xe8?I\x81\xef#\x14\xa8\x80?1|[T69\xbf?l\xbadc\xe4\x12\xe6\xbf2,\xe8f`\xe2\xf2?\\\xd8Z1\xe6\x98\xcc\xbf\xbe\x8a$o/y\xe5\xbfuj\\M\xc4A\xd1?\r\r\x1f\xc1\ts\xe7?\x0e)\x93d\xb5\x1c\xd8\xbfL#"\xd5\xb75\xb0?\xca\xdc\xf7\x8d!\xbf\xe7?\xa2\x8c[$E\x86\xe3\xbf\xc5\xcc\xb2\x02M,\xa0?\xf6\xfa\x970\xb7\x0f\xc0\xbft\n\x8a\xa2\x9f\xf3\xe0\xbfgN\xc7P\x8c\xbc\xb6?\xd5\xce\xc8\xa1\x99"\xd6\xbf\\\xa0\xc5%\xe3#\xe8\xbf\x80\x83\x10\x92\xa6w\xc6\xbf)\xc0\xcb\xa1 \x0f\xde\xbf\xddEX\xf8rg\xd6\xbfJ;\xcdy\x94\xb1\xc5?\xe9\xd7\x9b\xcdI\x98\xd7?\xa6\xd75\xb7\xe3I\xd4\xbf\xf2\xb1|\x1a\x13\xa3\xca?\xd9-\xf1\r\x87r\xb4\xbf\xb3\x0b\xc6B:\x89\xdb?\xc2\xd7\x99\xcbG\x9f\xe3\xbf-\x1e\x07\xdc\x05H\xaa\xbf\x13e\x9b\t\xab\xd1\xbf?mu-\x9d;\x14\x95\xbf\xb9I\x8d\x00\x84e\xd1\xbf.uv&\xedB\xe3\xbf\x92\x7f\xe8\xf6\xc9\x89\xbb\xbf6\xffG\xb0\x8dy\xc9?\xb9\x114\xf7$w\xd0?\xe0\xb8\xc9\xcch>\xf0?\x93\xa2>!j\x1b\xe1?\xe2s\x92\xaa\xc4\x14\xa8?\xb9\x95*-JJ\xa4\xbf\xf3&\'([\xfb\xd3?H\xfd\xdcIA\xbc\xcb\xbf\x07\xd2\x03\xb0\xc9\x1e\x93\xbfS\x0c9v\x8d\x85\xe6\xbf\x98%\x1d\xf7\xcfz\xc2?Ww\xac\x08D\x98\xbd?\xe6\x8a\xcf\xe7\x02\xe5\x89\xbf\xcc\xd1\x9e!/?\xb8\xbfGC\xb60gH\xd2\xbf\x13\x1c_7F\xd7\xe3\xbf\xffS\x96p\xcfD\xc8?\xbb\xbfB\xc6nc\xf2?2_\x99\xd1\x07\x86\xee?tB\x89\xea\x93`\xab?{\xd2t5\xba\x83\xe6\xbf\xc27\xbc\xf7l\xf7\xd5\xbfH\xb2FN\xe4\xf5\xca\xbfC\x07\x9f\xd3z\xbf\xe0?\xb47\x0c\xe5a\x83\xd4\xbfg\n\x0f\xe6\x90U\xe1\xbf+\xf8\x94dd\xeb\xc5\xbft1.o\xdc\x15\xe4\xbf\x97?=\x1c\xab\'\xcc\xbf\xa8\x88\xdfS\x0e\xcd\xda?\xb1J}\xeb\xe2\xd1\xbd?\r \xd5\x84\x87\xa0\x87\xbf#\x16\x8c\xb2\x14\xf8\xe3\xbf\x89\x9d\xda\xee\xfbT\xd7\xbf\xfd~\x1ct\xder\xc8\xbfcw\xd0\xa1\x11\x8a\xd8\xbf\x83\x93\xa5\x88\xb2$\xda?\xa3\x84\x7fJ\xe6\xa1\xb2?%,\xfb\x98*\xb0\xc6?\x05\xbd`(\xce\xc8\xa5\xbf\xeb2:)\x9c\xf7\xce\xbf\xc4\xc0#Z\xba\xcc\xcd\xbf\x8a\xf7]?\x1aC\xe1\xbf\x13\xee\xce\xaf\xa4\xb0\xaa?\x86\xee\xaf^\xfc\xb8\xc6\xbfn\x94\x8cw\x92$\xd3\xbf\x12\x02G\xc7r\xb4\xe0\xbf\x82\xb8DX\x0fO\xb4\xbf\xd5\x18v\x1fg\xbb\xfd?nr\xfe\xde\x7f\xe8\xe8\xbf\xa0z\xf8\xc1]J\xa3?\xc6@n\xca\xb9\xf4\xc5\xbfc\xeb\xd0%Y]\xad\xbff\x10\x94uq\xf1\xe1?.\x1a\xcd\x08\xdc\x02\xe8\xbf\xdf>%\x95\xcc\x8b\xd3\xbfq&\xc1\xe82\xb2\xd7?\x9f\xa3u\x16.\xe4\xb6?q\xe4\xaf;{\xbf\xe1\xbf\xe1\xb0\xba\x08\xcdt\xe0\xbfB\x02M\xea\xb9\xd6\xc6\xbf\xf7{2$\x01\xa9\xb4?\x13\x01\xdb\xa2U\x94\xe0\xbf\x06b\x92\xbcy\x9f\xbd\xbf\r\x11V\xe9\x9f\x11\xcf\xbf\x10J\xc3f\x0ec\xb6\xbf\xe8\xe0\x08\x1do\xe2\xcc?\x14\x82Y\x88\xed\xa9\xdc?\xb6\xa0\xbcI\xf7F\xcf?\x9c\x11\x00z1\x81\xdf\xbf\xa2\xd5%4#\xe1\xc6\xbf"HyU\xdd\xae\xbc?\xf3V[@\x07\xfb\xc3\xbf\x8c%\xf7j\xb0$\xea\xbf>y/\xb6\x96_\xc3\xbf\xc2j)\xd2t[\xc5?\xa7\x10\x19\x06\x92\xa2\x01@\x04\xbd\xb8\xb4\xb6,\xd2?\x83e\xfa&q\xe8\xe2?\x97\x87\xa0r \xe3\xda\xbf\xf1\xdb\r&\x7f\xc8\xd8\xbf\x88\x8f\xf0\xbcF\x02\xdf\xbf\xf8\x87\xf8/\xf2\x99f?0\xeb^\xbbZ\xdc\xc9\xbf\xe1\xb9\xc04\xee\xf4\xdb\xbf\x00\x00\x00\x00\x00\x00\xf8\xff]\x0e@\xa9\xe0f\xb9?\xc8H\xb5\xcf\x02\xee\xa5\xbf\x98@\xd4p3\x03\xda\xbf\xc2c\x12E)r\xe2?\xf2\xf04\xd1\xe8@\xe2\xbf3\xf1\x02PfR\xe4\xbfN\xee;\x1e\x7f\xe7\x82\xbf\xfc\xb8\x19M\xf0\xd1\xc6?\x83P\xe2\xf1 \xbb\xe1?z\x17\x7f%9y\x8b?^%\x9cz\x7fb\xbb\xbf!u\x86!\xe8X\xd7?+*k\x8f\xbe\xae\xc4?\xb11\x01\xde\xac\xb5\xf8?\r\t\xaa\x8b.\xa2\xc5\xbfj\xca\x0e\xc0Q\x12\xe1\xbf\x15\xe7WR/J\xd3\xbf\xbd\xcb\x7f9\ta\xc3?^\xb6\\\xfe\x98\xa4\xe9\xbf\xbe\xe2:\xfd`\x0f\xe5?B;H\xb5\xb5\x9a\xc0?"\xc0\xacw/\r\xd9?7V#2\xb6\xfb\xd3\xbf\x01\xbc\x88\x10\xee\t\xc1?\xf8`FT\xff\xd5\xe6\xbf}\xeeVGt\xf7\xd8?j\x11\x9a\xfc\x8f\x99\xc1\xbf\xb2\x1b|g\x02L\x9e?\x96W\xc43\xf3\x1a\xec?_,;\x82\xcf\xcc\xe0\xbfSQ\x99\xc7\x17+\xdd\xbf<\xd6\xd0h\xed\x02\xc8?\xfdo\xea\x1ag\xc9\xb6?zr\xde\xcdh\xba\xd2?0\x05\xe2D\xdb\x89\xce\xbfD\xffC\x8e@\xc4\xcb?\xb3\xed\xa5\xd3\x85\xc2\xb8?\xaa\x1d\xcd"\xa9\x1c\xf1?X\x1fg\xe3\x07,\xfd?D\xbd\x8b*\x91\xc9\xc2?\xa6\xe0\x0b\xef1\x16\xe9?\xe3P\xca\x98\x97\xed\xe3\xbfd0\xd3\x80\xa2\x91\xd3\xbf\xc4T\x96\x9a\x97\xe4\xde?\x1d\x9e\xe4\xa0\xf6\xd0\xd7?ja;.Rp\xe2?x\x94\xde\xdd\x9a\xf2\xde?L\xe5$1\x03h\xd1\xbf\x19\xa1\xaf\xaaT\xe5\xf2?\x08\xec\xbc,\xe0\xc9\xd2?\xcfE\xf2\xb3\x1b\xd2\xde\xbf?llr)\xd3\xce\xbf\xddh;\xac\xad\x1b\xe0?\xd7\xd8\xd16=\x0f\xf1?$b)\xdb\xe6\xd5\xd0?\x80\xfb\xb5\x96\x16f\xd2\xbf\xb7l\x1fM)\xb1\xd4?D\xbe\xf9d\x0cR\xd1\xbf\x05\xf6YI\xa0S\xe2?=~n\xf9\x91\x02\xe0?Ye\x92q\xea\xf3\x99\xbf\xa9\xd2,q\xd0\xaa\xe3\xbf\xa0k\x06_\xa4\x8a\xe6?\x85\xa3\xec\x16\x1d<\xe9\xbf6%\t\xb7\xec\x01\xe3\xbf]\xe3\t\xc6\x86\xfd\xf4?i\xc2\xac\xc4\x03U\xb8\xbf\xe9[\xa9\x7fT\x16\xee\xbf\x03\xb4\xf8GG,\xbb?\x7fo\xdfw\xf3\xd6\xd2?\xd9\xd6\'v\x06\xda\xe1?y|m\xce\xe0\x83\xdd\xbf\xe5&N\xc0\x9dj\xe1\xbf\xbaICz\x01c\xa2?]{\xc4`\xb4\r\xd4\xbf\xe5\xefS\x9f\xbdN\xd9\xbfvGhA\x88\x90\xae\xbfA=\xfa-\xf9\xfd\xdf?o\xf6K\x92\x1e\xeb\x9f\xbfg\xf7\xa8\xb5\xa1~\xca\xbf\x9e\xfc\x94\xcdC\xf4\xd9\xbfbD\x0fH\xb3i\xed?\xf2\xb3J\xdc<\xe8\xc1?\xc3\xbe\xc2gB\xe9\xe9\xbf\x1c\'o\x8f\xd9M\xb5?\x90\x90\xa0\x11@\xc0\xd8\xbfV\xed\x8aVdh\xc7?\xa1\xad\x1a\xf2|\xd8\xd8\xbf\x8e\xf0\xd28Tn\xed\xbf\xd6UE{*\x9f\xc4\xbf\x9a\x08U\xc7\xb2\xbf\xc0?\xb6\xf9S\xf2g\xe8\xf7?\xdb]W\xc6\xfcM\xe4?\xaf9g\xb1X?\xd2\xbf\xfcY6\xa1\xd0|\xa0\xbf@\xcf\xed\xaeT\xce\xe2\xbf\x94G\xd5\xcew\xf7\xb3\xbf\x96\xc4\xf5X\xf0R\xd6\xbf3[\xde9R\xae\xe5\xbf\xead\x9b\xce\xc9\xc0\xc8?~u\xd6\xa1g$\xc9?\x15\xcb\xa1\x84\xfa\xbe\xdb\xbf/uR\x15\xb3\x08\xbd\xbf\x97\xf5`\xa2\x04@\xf0?\xaahb\x82D:\xe2\xbf\xf18\x01a\xb9\x83\xd3\xbfY\xc5\xb2\xbcV\xd4\xd3\xbf\xb0\x189\xf0e,\xd3\xbf\xb2\xa8\x90\xf5\xc3\xbe\xf2?\x9a:.c\x82\x12\xd2\xbf\x83z\x8e\xd6/\xf0\xf0?r\x0en\x1f`8\xd4?K\xa8R\xad\xae\xa3\xe0\xbf<4q"8\x9d\xa2?>\x93\x16\xc2U7\xd5?\xeak\xda\xe2\x01!\xd6?p0]\xcdt\xd7\xac\xbfP\xa5f2\xe9|\xe2?:S\x85c\x18\xab\xc9?\xd3u\xba\x87=\x85\xa0?\x1fcYq\xf7\x98\xfc?EVm\x1b\xb6\x9e\x02@\xf6s\t\xba]\xdd\xd3\xbf\xf7\x1cz\xd8\xc4\x17\xef?M\xe0Q\xc9\x81\xb6\xce\xbf&X\xf4\xdc\xbf\xc5\xdd?\x90\xb7\x87?\x02N\xe3\xbftt[\xc4\x13\xf3\xbf\xbf\x97\xa3#q=l\xe3\xbf>\\e]\xd1\x04\xd3?b\x9c6\xc3~;\xd0\xbf7>\xa5\xf6Q\xd5\xb2\xbf\xc2\xf6\xcd\x19R\xf0\xe4\xbf\x83g\x96\xf2\x9cR\xd1\xbfP\xbb;\xea\t\xa7\xac\xbf\x04K\nI\x14%\xbc?\xfbt\x83\x1c\xb3\xc4\xdb?\xc1\n@C\xb6.\xe9\xbf\xae{\xbc=\x90j\xd0\xbf\xab.J;3\x84\xeb?\xa8\xe8m"\xfd\x1d\x8b\xbf\xd2\xb9\x8cS3P\xd2?Du\xf0m\xeaU\x94?|\x0f\n\xaf\xa3\xe9\xe2?j m\x8fC\xec\xd2?K\x06\x8d\x86\'\x9b\xba?\'\xfa\x88\x96B\xfd\xb4?\x1c\xbf2\n\xdc\xd7\xb7\xbfv\xdf]\x87\x93\x93\xe2\xbf#\xb8E"\x0ch\xdc?.\xe9\xe5\x87K\xf1\xb3\xbf\xf07Er\xae\xf3\xd2?\xcb;\x12\x13H\xaa\xe2\xbf%\xc2p\xe1\x9ba\xe1\xbf\x1d\xb3\xa2\x86/\xc2\xda?H\xaa\x88\x96\xf6\xe0\xdc\xbf\x11$\xe5C\xe2\x83\xa2\xbfu\xf0\x8a`\x82\x01\xe5\xbf\xe74-1i\xda\xb2\xbf\xdf\xd6ee\r6\xbd?\xfba\xe60\xdf\xcc\xe2\xbf\xfa\xc8>\xa0\xf3$\xf0?<0\x85\xfe\x12=\xa7?\xfc\xf9\x08w\x98\xbd\xd4?k\xfe\x91pQ\x06\xea\xbf\xeb\xc9`\x13U\x82\xcd\xbf\xd0\x17\xef\xa1\x80\xbdA\xbfx\x12F\x81\xf5.\x96\xbf\x1ab^G\xaf\xf9\xbd?\xeb\x01S\x90g\x92\xbb\xbfu\x07\xd6|\xcaA\xe2\xbf\xb6\x8b\xde\x8c\xe8\x89\xc7\xbf2Im\xa9\x84\x1c\xce?\x86\x18D\x1an\x90\xb4?a\xf38\xc5\x0f|\xc8\xbf ~\xb8q\xf4\xd2\xe7?\xb9\x0b\xc7}\xc1h\x92?\xe0\xa7qX~t\xe4\xbfW\xe9\xdb\x04\xadj\xee?^\x11\x87\xb4\x06\xc5\xda\xbf\xc0_\x9372\xc7\xf0?\x0ev?\xdc|\xd3\xe0\xbf\x03k\x0c;\x0c\n\xab?=\xd711s\x10\xdd\xbf\xd4\xeep\xce\x903\xe1?W\xeck\x17\xb0\x9b\xdf\xbflSz\xfd\x82y\xaf?\xb1\xf5\xf5N\xa4P\xda?\xbd\x02(\xa6\xab\x94\xe5\xbf\xa5\x0f\xef\x0e\x05-\xce?\xae\xc0~\xd7/5\xef?\x1a{\xb5\xee;\xb9\xea\xbfr<\x04\x8b\x9e\xf4\x90?\xd7\xdf\x98\xe51%\xc4?\xf2^\x8c\xc4\x83r\xe5\xbf\x1d\x8b\xd8\x8d\x05]\xd4?\xe3\xb4\xb0\xa1\xd1n\xa7?o\x19\xfcd\xf4K\xa2\xbfuY\x12\xcc\x10\xd8\x00@\xbe3-\x88y\xe6\xd6\xbfx\xc9\xa8k\xa2w\xe0\xbf\'\x126\x86\xf5\xfc\xd9\xbfs\xb1GG\xb5\x9d\xbd\xbf\x00\x00\x00\x00\x00\x00\xf8\xff\xc8\xf93\x94\xca~\xbe\xbfB\'<h&a\xa0?\xc1m\xca\xc6\xaa\x9f\xe0?@\x936p[H\xa9\xbf\x0bVt\xdb\x0f"\xc1?\x13M\xd4\x0f\xef!\xe6?+\xdf\xcb\xb9\xce\xd7\xcd?[m\x12\xc4\xa1\xcb\xc4?\xd1\xc2\xfa\x1d\xba\xd0\xd2?\x9c\xb6\xb1d\xc3\x87\xdb\xbf\xebj\xfeEm\xf4\xe7\xbf\ro\xcf\t\x84\x84\xa3\xbf\xbb$5\xd28g\xe5?U,\xaet&\xb0\xe4\xbf|\xc4\xa9`:0\xc1\xbf\x8e[\x90sa\xef\xd9?\x84\x02\x85\xec\x10R\xa9?\xcaC\x9f\x16\xe1\xcf\xe4?b\'\xca\x9eL\xcf\xe3\xbf\x86_\xf0I\r\xbc\xd3?\x91\xf0M\xf3g\xcc\xe4\xbf\x98Q\xf9>\xa0\n\xcc\xbf\x05(\x86\xd1\x00|\xcc?\xb6\x9b\xbe\x9c\xd4\xdd\xd3?\x02S\xf9\xd0?\x9e\xf6?0\xb9&\xcc\xe1K\xbc\xbf\xa7F\x8fA=h\x8f\xbf\x83#b\x81(\xeb\xf7?4\xa1M(k-\xed\xbf\x7f\xe4\x94!?:\xd3\xbf\xf4\xea\x04\x87]\x03\xef?\x8c\xdei\xc6\x93\x0b\xbb?\xa4D{\xcb\xe6I\xb0\xbfR\x0f\xe5K\xfa\\\xc7\xbf\xd3 \x9c4qk\xc3\xbf\x8a\xfb\xe7\xde\x0e\xfa\xf4?\xa0:\xfe\x9dd\x0c\xdd\xbf\x86\xcc\x1f\xc8\xd0\x08\xf8?\x9b\xef\x80\xbd/\r\xf3?\xcb;\x84\xec\x8a,\xb4\xbf\xdb\xe6~d_\x95\xe2\xbf\xe6\xc5H\x0b\xd6M\xe3\xbf\x9a\xc9\xe7\xb3\x08\\\xd2\xbf\xb9\xf6\x95\xd0\'\n\xf2?,\xf3i\x92\x9c\xb7\xcd?d\xc6KKD\xc4\xed?a\xaeg*\xfa\xea\xd8\xbf\xdcN\x19#[q\xe7\xbfC|\x1f\x81 k\xbe\xbf\x9ak\xbcXBb\xca\xbfU\xceE\xbbC\xe3\x9c\xbf\xba\xa7\x1e\xe6\xb5$\xb9?\xd1\x7fL4@m\xb7\xbfs\xbd\x8c\x0b\x97\x87\xeb\xbf\xb0qc\xe9\xab\xbd\xd8\xbf\xcc\x00i\xf6\x89\x1e\xd2\xbf\x06r\xb4B\xfc\xf4\xb5?\xaa+\xb9\xa3MO\xb2\xbfb\x8d\xb0\xd4\x17\xde\xea\xbf\x97n9\x16\xb0\x98\xe8?\x03\xe1^\x16q\x19\xe7?\x95\x87\x86  \xc7\xdf\xbf\xf0\x15;\x8c*\xbe\xdc\xbf\x99\x19\x8b}\xdao\xd1?\x98&\x14\x04\xd5)\xab\xbf\x96\x85\xcbYt\xa3\xb7\xbf\x12\xa3y\x7fX\xb1\xc4\xbf\xc5\x9bk\t\x93u\xdb?\x16\xed\\\xf0H\xbf\xad\xbf\xa7[\xcd\xe6\x16\xfc\xc1?\x12!U\x9a:G\xd6\xbf&\xca4\'.+\xcf\xbf\xecpz\x92\x080\xef?\x06A\xd3\xef\xa52\xb3?T\xab\xf9\x11\xb9\xfe\xf1?\x8a\x82\xf2\xc44\xa6\xe3\xbf\x18;-\x08_ \xb0\xbfm\xff\xa8\xe8\xf4\xc8\xdc\xbf>n\x14\xaf\xd7\xcb\xc8?\xc4\xf0\x13\xbc\x86\xd4\xd3?\x0b\x01Ei\x04\'\xc3?\x1a_7P\xb4\x06\xc4?\x19n\xad\n\xd8M\xc0\xbf\xbf\x80\xa3\xd7\xe4\xb9\xdb?\xf1\xa0\'\x96\x7f\x10\xa1\xbf\xaf\xe8"{\xad\x0c\xde\xbf\xcb\xd9p\xd4\xc3G\xca\xbf\xd6\x8f\xf2HF\x8d\xde?\xa1\x9d_T\xdb\x9a\xb0\xbf\xb48-.D\xba\xe5\xbf\x8b\x99\x8f\xa27\xe1\xee?\x8f\x0e\xe7JF\x19\xdf\xbf8L\xe7"*\xc8\xd7\xbfJ\x10X\x18E\t\xc8\xbf\xb5R\xac\xfas8\xca\xbf\x17\xc3\xf2\x05\xbf%\xd7?\x97\xc5&\x98\x7f*\xe0\xbf*\xd1x{\x12\x13\xd9\xbfIM\x01\xad\xb8\xbc\x91\xbf)\x11\x1dRd[\xc5?\xf9\x96\xf6\x87\x13#\xd0\xbf\x92qK\xfbd\xc2\xd1\xbf bx\x16|\xc9\xce\xbfK\xbf\x0e\x00\x10\xb7\xcc?=:\x12G\xe2.\xd9\xbf\n\xeb\x9a%\xa5y\xd8\xbf\x05\x10\x89"T\xa9\xca\xbf\x8ex5?Pq\x8e?\x91\xeb\\.\x9e\xc0\xe1\xbf\x9d\xaf\x0er\xb8\x87\x9b\xbf\x00v\x04\xfcc\t\xd0?\x01\xf0\x18\x85\x01\x97\xbe\xbf\xba\'#\xe7tE\xb4\xbf}\xd0\t\xd1\xcb>\xf3?\xee\xe0\xae\xe4\xe6G\xf8?\x0e\x1d\xd3\xe0\xf41\xf0?\x8f6\xea\xc5\xcc@\xe3\xbf\x196c\x80\x13\x8a\xd7?\xf6\xccL\x01\x12<\xcc?\xcd\xc9\xb1\x88\x96\x15\xc3?6\xefLe\xa0\xa0\xc1\xbf%\\\xa4vA\xdb\xee?\x7f\xac\xe1z\xc4\x90\xcc\xbf0\x01\xd4\xb0|x\xe0?\x04\x88d\x93Y\x7f\x8b\xbf\x94\xeb\xba\xf0\xf5\xb8\xb8?0\x1c>\\-\xd8\xe2\xbfZ\xc1\xae6\xa39\xba?\n\xf3\x9f\x18\xc9\x12\xc3\xbf\xa4\x11\xa9\xb7\xcd1\xdb?\xfa\x90\xb6\xc9\xe5S\xbe?\x011\xc6\xbb\x87\xef\xd9\xbfeG\x0b\xad>\xb8\xbf?\xea\xbd\xa6qa\xfd\xd1\xbfp\x1a\x1cP\xb3s\xd8\xbf\xedb\xfe\x90\xacO\xaf?V\x8437\xa1\xa6L\xbfOfn\xbc\r\x90\xed?\xb6\xe2\xd8@\xb0[\xbd?\x03\xe8?\xc6\xc2m\xce?\x7f8\x85PxA\xe9\xbff~\x12\xa1*\x01\xb3?\x9d\x18\xc1\x85\rR\xd2\xbf\xe2\x85\xbe2|e\xec?l\x0c\xa3 \x12\x10\xc7\xbf\x0b\x97H\x19`\x82\xa2?r\x1b\xb2~fF\xfe?\xa8\x16i^\xa0\xf7\xcc\xbf\xd6\xea\xc7n\xf1S\xb4\xbf\x86K\x85\x9b+\xf9\xbe?\xad\xf8s\xc0\xeb\xec\x95?\x8d\x10\xde\xab\x15)\xc6?[\x99\xdd\xfb\xbe9\xb2?\x9d*\x19E\xb2\x15\xe9?\xc6z\xd2v\x01\xc7\xd1\xbf9&\x19\'F\xd2\xf1?O\xa0\x1c\rC\xd5\xde\xbf\x8a\xa0\\\xd9l\x8b\xd4?\xafy\xc1c@L\xe5?\xc3oKm\xa5=\xc7\xbf\x94\xedw\rT^\xbd?\xcc\xdaYr\xf4\xe0\x95?}\xb8\xdat"j\xb6?9aA?Q\xbb\xee?\xf2\xb5\xc2\xf5\x90o\xe3\xbf\xdb\x85\x9d\x80<~\xdb\xbf\x08.o[;\xe6\xe6\xbf*f\xaa\xaa\xb7\xc8\xd0\xbf\xf3eI\'J\xce\xae?\r\x81\xa8\xb1\xc9\xd0\xd4\xbf\xea\x13Z(\xbfr\xdb?\x8d`]F\x12\x04\xc9\xbf\xdc-H\\c\xb4\xd6\xbf\xf2\xcd \xf7\x93X\xe2\xbf\x96\x19B\x07J\xa9\xf3?\x94p\xbd5/\xbf\xaf\xbf\xe4\x0c/\xb7I\xb8\xc0?\xbc\xdc\xb8\xe5\xcf\'\xdb?\xef\x16\xa9\xdb\x0bz\xcc?\xf9\x9b\x13\x10oe\x97\xbf\xca\x1d\x92;s(\xc4\xbf\x9ep4<(\xc7\xfd?\xb5\xe1\x9e\xd3\xa0\xde\xc3\xbf\x14\x1dp\xfd_5\xc6\xbfd\r.A\xb1\xee\xd9?z\xf8\x84\xbf\x7f\xe5\xd8?\xda<\xec\xbd\xd5\xa0\xc4\xbfZa\xdan\xbbX\xff?\x0f\xca\x88y\x9d\x1c\xd8?=\x98\x13\xdb\xd3\xb6\xe0?\xac\xf7\xfcr;\x84\xe0\xbf\xbdB\xc4\x84\xd0\xb3\xad?\xa3]\t\x10\xad\xea\xc4?IO\x93\x04\xe6z\xda\xbf\xf3i\xb7\xa7\x93\xd5\xe1?\x8c\xab\xd0\xc3\xe9\xe3\xe8?\x8a\x8e\xa6\xf61\xa4\xcc?T\xd0K%\xb0+\xd1\xbf\x99\x84-\x8cj]\xb4?\xecq\xf6\x11\xceB\xda?K\xd9\xebyY(\xcb?\xcd\x12\r\x8e\xd8\x97\xd4?K\xa9\xae\x839.\xd9?l\xa8T\xb3Q\xd2\xd0\xbf\x9d\x85\x83{\xd0\xf9\xdf\xbf\x8fBA\xc4\xfeX\xd2\xbf\xab\x00D\xf2\xfc,\xb7?%2\xd0\xde\xdf\x02\xda\xbf\xbb+\xca\xbc\xd0:\xd5?\xc3\xce\x06\x8d\xc6-\xef?\x98\xb5-B\xa4\xf0\xd7?ih\x8e\xa7\xeb\x0f\xd7\xbf\xc5\xdbq;1\x97\xe3?\x1d\xf5}\xf3\x1a@\xe3?D\xf3\x0fH\x88p\xd5?\xca\xec\x1c1\xf2\x8c\xe2\xbfN\x01\xb4<`\xec\xce\xbf\x11\xbe\xdc\xbc#\x08\xe2?y\xc31`\xff\xbb\x9a?B\x05?>\x98\xfa\xe6?\x98\x0fq\xb6\xd5\xa9\xd2\xbf~\ti\x18\xc4H\xb4?\xac2\xb0\x98\xdf\xc0\xe6?\xd1\x11\\[R\x1e\xe7?\n\xaf\x7f\xae{M\xde\xbf_\x8dI`\xfdH\xac\xbf|\xcb\xeejS\x02\xdc\xbf\x07\x0fL\xf4\t\xd7\xb0\xbf\xce\xe9f$\xeb\xa1\xf2?\x8d4\x18\xe5\xadh\xbb\xbf\x92\xbc\x1d\x0e\\\x1a\xa3?\xcd\xbd\xecg\xc3]\xd9\xbf\xd9\xcd\t\xcb\xfd\xa5\x96\xbfL1\'\x13\xf0\x9f\xd6\xbf3\x8a\x90;\x80n\xce\xbfS!\xd7|4\x1cm?3\xa0\xee\xcf \xc3\xce\xbf\xa1\xa3\xe8\x00|\x02\xd4\xbf\x12\xf5\x1d\xbc\x1c\x04\xb7?\x98\xd3\xd3\x1bLN\xaa?\xa4`(R\xce\xd9\xf2? \x8d\xb1\xef\x10\xdf\xc3?q\xfb\x1b4\xbfs\xe7\xbfz\xb6\xd8\x08\xa2\xf3\xdc?A\x88\xa5\x85V\x84\xd8\xbf\xe0\x82\xd8${\xbb\xb1\xbfw\xc5\xaeQ\x01\x06\xe8?\xff:\xf0\xd9\xa5\xf5\xd8\xbf\xf3\x81\xfc\\\xa1\n\xc7?l\xc3<\x95@\'\xdc\xbf\xbe\x06$.\xc1#\xca\xbf\x05\xcf\xd4Z\xd7\x03\xd3\xbf\xed\xac\xee\x96\xf0\x93\xdd\xbf\x1bkr\x93J%\xc1\xbf\xbe\xb6icA\xb0\xe1?R\x1bNK\xae\xeb\xc3?\xd7\x0f%\xce\x13\x16\xa5\xbf\x86\xeb\x1e\x83M\xa3\x83\xbfUY\x84\x18\xfbe\xb7?\xc4\x7f\x84F&\xfc\xc4\xbfo\xd5\xa9h\xabI\xe4?<qV\x18\x93;\xd7?\xc7\xeb\xdfE\xbd|\xdc\xbf\xb7C\xe8;?\xdd\xe1\xbf\xe4\xbdW\x96O\xdf\xce?\xcf\x99\xba\xa94\x17\xe1?\xc71\xe7\xa3t%\xd7\xbf\xa8\x1b\xd3E\xd68\xb7\xbfG+\x9e\xe5\xaf\xdc\xe1\xbf\xb2\xfd\xde@3C\xe5?\xadG\x9c\xb5\xfa\x13\xf1?R\xa5YP\x05\x9d\xeb\xbf\xb2N\xac\n\xaf;\xd2\xbf\rI\xec\x94\xae*\xc9?<\x1dM^|\x13\xcd\xbf\xa9\xeb\xc9\xdd\x82\x9a\xe9?\xec\xf3\xf64\x7f|\xca\xbf|\xc8: \xb3\xed\xe0\xbf\xe3\xa2\x12\x95^V\xe5?h\x89\xa8\xe8j\xd9\xe6?\x8d\xb7d\xeaA]\xd3?m\xf2\x89\xf9v\x82\xbb\xbf?\xc5\x1c\x1d\x0b\xc9\xa5\xbf\xa9\xbf\x93Z;}\xe4?\xde\xc5k\x97\x98G\xde?4j\xa1\x1e\x01\xcd\x02@\xd9\x8d\x01%\xb4\xc9\xc3\xbf\x84\xd3\x06\x9e\xd8C\xa2?[\x91?\xfa\x17\xa8\xe4?!K\xbb\x07i\x95\xcb?\xdc\xd2\xf3\xe1Q\xc3\xe3?e}\xa5i"\xc0\xe0\xbf\xdf\xb3\x12\xda\x11`\xc9\xbf.\x97\'O\xca+\xe9?\x8eO\xf0\xe1\xcd\xb5\xf6?\x17\xfd\n\x0e\x89\xc0\xb1?\'i\x8e\xc7\xe37\xb6\xbfA\x11d\nR"\x99?m\xde\x12\xb7\xfc\x07\x92?T\x8e\x0bcN(\xce?a\xb5\xcb\xb2\x19\xd7\xed?\x8a&\x9e\x06w\x93\xc6?\xa6\x1f \xf4\xad,\xc4\xbf\rJ_[\xaa\xf3\xdf\xbf\xb0</.\xff\x7f\xe7\xbf=\n\xce\xf8m-\xb9?\xbeZ0\xd6s\xe1\xc7\xbf\x00\x00\x00\x00\x00\x00\xf8\xff7h\xe7X\x11\xcf\xe0?%\x9c:u\x06\xd4\xe9?\x97\xa5\xb5^\x89\x84\xe1?\xdf\x98\x98+\xa1\xfb\xe0?\x86S\x0e(\xa3\xe4~\xbf,D\tF7\x00\xd8\xbf\x85\x11:\x9bfM\xa5?6\xf4rq\x7f1\xc3?D\x14\x80\x82\x13\xc9\xe2?\x19\x1e(\x86\xc4>\xab\xbf7\x06?\xce\x90[\xd4\xbf\xd3\xf35A\xf4"\xb1?k\xfc\xcd[\xfd\x9e\xeb?U\xb0{p\x17\xf3\xe4?\xb3\xfd\xac4z\xa6\xda\xbft\xb8F\x08HE\xd3?-W\x04p\x9b\xaf\xce?\xb3\x1e\x96\xe7\xa8\xab\xdb?\xe9\x12\xf4\xc4\x0b\x8e\xe8\xbf\x81\xc4uG|\xdc\xd4?\xd01<\xe0\x8a,\xd5?E2\x94m#\xfc\xd6?>\xa2\x9d\xf9\xd6\x9e\xda?b\x98(\\\x97=\xd8?\xd7|\x12\x812p\xec?6\xa0O\xad\xaf\xee\xdd\xbf\x99O\xf4\x9b\'\x9e\xf0?\xb1\x98\x9c@W\xed\x9f?F\x10+i\xa1\xc6\xf4?8\xda\xb7X]\x1a\xe0\xbf\x86\xe0\xddg\xc2n\xe0\xbf\xb2\xf7\x92W\x86N\xcb?\x01W\xcf\x00f*\xbc\xbfv\xb0{\xe0\xe8\xb0\xac\xbfP\xf8\x07g\xca\x91\xbf\xbf\x9c\x9cZ\x89g{\xc8\xbf\x05\xb6.\x8a}\xea\xdd?Z\x1cR\xe6\xcd\x18\xc3?@^E\xfc\x89E\xef?sP.\x84gR\xba\xbf\xfc\x11X\xd9\x1e\xfa\xe9?[\xf4\xa4XV$\xbf\xbf\x99$\xe8\xf4\xfb\xf6\xd3\xbf(b\xb4\xd0\x9f\xc3\xed?\xa2\xbdxx\xd32\xcb\xbf7_i\xd3j\x0f\xf1?\x1fA&\x01\x11:\xfd?\xad\xbc@\x16\x90j\xd4\xbfOn\xcb\xb1\xa6\xa5\xc6?J\xc8\x14-\xa44\xd4?&#0\xaa\xf3\x06\xd6?\xf1\x8f\x1e\x96DW\xcb\xbf\x8f\xb8\x86_\'\xad\xe0?^E0y\xe5\xb0\xf2?\x85 \x17\xca\xc1\xf5\xca?e\xa9\x98\xcbXW\xc3\xbfH\xe3\x1a\xa8d\xf5\xe1?4\x8e\x06=\xc5\xc7\xac\xbf\x01\xed\xc9\xe4\xb5\xb6\xd2?\x17\xf5r]-\x9e\xca?&\xc4W\xe6\xd0\x1a\xc5?6i\xc6\x08\xd2\xc2\xe2\xbf\x80{\xe16\x11\x8c\x00@\xf0\xc5\xe3\xffR(\xd6\xbf\xf1\xae\xcap\x0c\xe6\xe2\xbf\xf5\x03\xc2\x12\x1f*\xa3\xbf\xee\xb6t\xe8\x06P\xe3?Q^\xbf\x13\x19\xb2\xea\xbf\xae\xaag\xd5\x19\xf1\xd9?-;\xb8\x9b\x9c\xb1\xda\xbf\t\x17\xf5\xc2"up?\x7f\xe7\xee\xcd(\xdf\x96?\xe1\xd3R\xd8mV\xe1\xbf\xf6\xd5\x01\xe5\xb7?\xce\xbf\xcbU\xec\x10C\xd0\xdb?\xd1\xd8-\x9c\x99\x0e\xdc\xbf}\xee\x17\x1e\xbd\x96\xc6?d\xbanB\xfa\xab\xd9\xbfz\x1dv\x1b\xef@\xcc\xbf\xe7!Qb\xdc\xac\xd7?at\xba~\x17X\xe4\xbf\x84!p\xf4\xa4*\xf0?\x8c\xf8\x1c\xed\xb4\xd3\xe2?\xb3\x9a\x1d\xc5\xb4\xdd\xe0\xbf\x94U\x02\xa8(\x1b\xdb\xbf\xe9\xe2\xc6\x1a8\xdf\xc4\xbf#\x98n\xf1Ni\x9d\xbf\x93Q\x95\xe1(P\xcb\xbf\x15\xd1$\xb5K\x17\xed\xbf\xcf\xc88\x82J\xc3\xd2?=7tR\xa2\xe4\xbf?\xe0>\xc9(+\x03\xf2?6\xdb\xbedq\xaf\xe1?\x8f\xea\x88\xe5\xe0\xf7\xe9?\xaa\x1b#\xd7\x1csi?\xba\xc8H\xb1m`\xee\xbf7\x10\'\xc5\xa9\x04d?V\x9a\xfb\x18\x94L\xd6\xbf\xac\xa1r^\x9a\x05\xe5\xbf\x07)9W\t\x9a\xc0\xbf\x9a\xa5,\xbd\xc6;\xc8?Y\x18\xb9\xa7P\xed\xcd?Y\xfb\xce\xc7\xca\x12\xb4?\xff\x8bz\x8d\x96\xa2\xf6?\xb04\xd6\xe5 \xf7\xe1\xbf;\xfa\xc9\x04K\xb1\xa8\xbf\xa6\xf3fMf\xe0\xc5\xbfTOR\x82\xc2\x9c\xcc\xbfL\xcfi9w\xfa\xe2?{_^\x10\x03\xfb\xb2?\xb7l\xc2JS\'\xd8\xbf\x0e\xbd\xf7\xef\xa2:\xcf?\xba\x88j\xf6)\x12\xc1\xbf-e\xae\xd2e\x9c\x90?\x96\x84$?\xf9\xbf\xc5?!\x90\xdb\xce\xc2\xa9\xc2\xbf\xcd\xd1\\\xc3\xd27\xe1\xbfW\x99B\xc9\xd5\x11\xd7?<I\r\x8a\x89\x1d\xc3\xbf\xc7\xd0\x84\xa3\x816\xd5\xbf\x1f\xdf\x1bi\x12\x8c\xe4?\x8c\xf1\xc4\x0e\x81\x90\xe3?\x86\xba\xb4\xb9y\xb6\xdd\xbf\xd0\xf3\x98s\xc5o\xaa?B\xd9\xce\x05\xf3$\xe0\xbfon:\x08\x7f\x8c\xf7?\xe4\xb8\x86\xa3\x88\xfb\xeb\xbfY\\\x83"\x1e#\xe2?]\x84 \xe7\x12h\xdf\xbf\x0cQh\xf4\xe5m\xd1\xbf\x9f\xf0A2\x1a\x94\xd2\xbfb\xfaD\xa0\xb1n\xce?\x19DI\x18p\xc0\xd2\xbfC6\'\xca\xfe\n\xd7\xbf\xa2\r!JD\xb5\xcb\xbfw\x1e;\xeaqC\xe3\xbf}\xacHm\xfeI\xc9?lhV:\xd8\xdd\xe8\xbf\xe7!\x8a\xa4\x8a*\xba?\xb3\xb9}\xd0\x15\xb0\xdf?G\xa6\x90\xa1A\xcd\xc0?\xbc\xb5\xec\xb3\xb0\x14\xdc\xbfM\x9f%M\x9c7\xd9\xbf\x9c\x1b\xfb\x8a\xedI\xa4?\xd3\xab<\x8ax\xcd\xca?\xb9w\xf9!r\xc9\xce\xbf=\xac\x1c\x86l\x00\xc0\xbfrH\xb1\xb4\x8bf\xe2?X\xca":Pl\xbe\xbf\xbd\xf9\x05\xad\xc3\xd5\xc5\xbf\xd9\xaeng\xe8\xc6\xcf\xbf\xecb\xb9e54\xa5?8N\xd3Q,\x18\xe9\xbf4\x11\x99\x95(%\xe3\xbf\x9d\xe0R:E\x9b\xd7?\xc0"$\xe7\xb1\x0f\xe0\xbf:\xc8\x06r\x0bz\xd4\xbf|\x94H;\xbd\xe2\x92\xbff\xd4\x83Y\x13\xbb\xc5?R\xbc\x06F\x05\x86\xcc?\xdb2|89\x07\xd6\xbf9\x16\x8f\x83?m\xcb\xbf\xd1d\xce?t2\xe5?>\x06\xbc\xcc\xd5\xcd\x84\xbfl5\x1d\x99\x19h\xe6\xbf\x86\xc8e\xb2\xef\x0e\xe2\xbf\xc4p&\xd6\xb9\xd2\xda?\x10!^>\xba\x05\x81\xbf4\xed\x17\xcef\x98\xa6\xbf/^\x92bO\'\xa2\xbf\n/)\x16\x02\x06\xe2\xbf\xfb\x1c\x89\xd9\xa7d\xba?\xc8\xebC?\x1d\xa7\xff?\xca\xaa\x1cd\xb2\xf4\xdb?\xdd\xf8\x8dx\x8f{\xcc?\xed-\xb14t6\xd9?\x7f\xf48]\x17\xf1\xdb?\xa7<\x99\n9?\xe4\xbf=K\xa6*\x1f\xa9\xe6?\xd4\xa4?\x15\x7f\xc5\xe0\xbfz\xfe4\xceL\xbd\xcd?c~\xa4\x95:\xa5\xea?2Na\x863\xfd\xcf\xbf\xce\x0c\x05\x1d\xba\xa3\xe2\xbfE\x89\x99\x13\x84,\xdc?a\xc4\x1f\xde\xa7\xaf\xd6\xbf\xf5\xd7.f\xe0\x95\xdd?\x80\xdc\xb0\x95\x1b~\xd2\xbf\xd0\xb3V\xecP;\xed\xbf\xe5\x18\x19d`\r\xd3\xbf\x9c\x0b\x1a\xc4\xe0\x0c\xf5?\x13z=\xff\x85\xa0\xca\xbf\xd8\xd5T\xec\x0cQ\xb6?\x9a\x9a\x1c-\xad\x1e\xe5\xbf8+m\xc0H@\xd7\xbfm\xc2)0\xabY\xc6\xbfd\x16[n\x8c\xc8\xe6\xbf\xdaI\x9fI\'t\xd2\xbf\\\xec\xa8 \x86\xaf\xe5?0\xba\x9f5W\xfa\xe6\xbf^\xfe(\x0e*\xcc\xdf\xbf\x0elYT*\xed\xe4\xbf\xfd\xde\xb0\x11\xc4\xa7\xde?\x00\x00\x00\x00\x00\x00\xf8\xffMKS\xce\xa1Q\xad?)\x18\xd3\xd3\xa3\x80\xc0\xbfp\x0fX\xf1\x90\xff\xc8?I\xc3cq\xc4z\xe7?\xdf\x0c\x1eG\x13\x8dt?5\x81\x81\xa4C\xc2\xd1?\xc1\xb5\xfc\xbe\xa0\xdb\xcb\xbf\x10\x7f\x13\xa6\xc4\xbb\xaf\xbf\xcf\x81\xa3(Av\xdb\xbf(\x18V\x8c\xdf\xc8\xd6?\xd0g\xb6e\xb4Z\xe6\xbf\xc6\x13\x8a\xbc\xd7\xc0\xd2?|O\x80S\x906\xd0\xbfba1r\xfb\xa7\xf0\xbf0Ls\xfbl\x03\xb1\xbf>\xa0,\xd6\xbe\xda\xca?C\xa7\x93\xf5\x12\x9b\xca\xbf\x0e}\xae\xac\x9e]\xdc?\xcc\xd5X\xd9\xff\x7f\xe3\xbfb\xd0q\xfaz\xc3\xb1?,\xdc\xe1N\x07\xd5\xde\xbf\xe2\x87\xa6\x94=\xd3\xc3\xbfI\x7f\xbdC\x07\xba\xcf?\xc2\xf4Hw0\x9c\xb2?\x15\xfb_\xa0\x8b8\xd7?\xa1\xa4\xa0\x0f\xf1\xc3\xa3?-\xf1\xbd\x8fQO\xa6?$\xe3\xf93\xe3P\xe2?\xbe\x8e\xb1\x02\x94Y\xe9\xbf\'\xf3@k\xd0 \xc2?\x98*YzH\xcb\xfe?\xdb\xde\x91\xda\x13K\xd2\xbf\x8f\xaf\xfd\xb5\xfet\xc0\xbf\xc3\x04C\xba\xd7\xd0\xed\xbf\x03\x00\xbf\x86\xea\x95\xd9\xbf\xdfB#2\xc8\x02\xf4?x2g4\x0b\xf2\xdc\xbf\x9c\x15\xe8\x1b\xc9\x83\xf1?@\xb2\x7f\xa9\xd8\xef\xf9?\xa7v\xd4^\t0\xe1\xbf\xee:\xcajuh\xdb\xbf-Z\xa45\xcd\xdb\xda\xbf\xbb\x03\'\xe7\x9e\x7f\xe0\xbf\xe4R\x94\xeeu\xff\xe1\xbf\xa6\xb5\x86\x89F\xa2\xe8\xbf-\xb1k\'v\xb0\xe4?\xe6\xf1\x80\xc5\x11(\xe8\xbf\x1d\x8a\x9ds\xbf\x90\xe4\xbf\xb7J_\x85\x8b\x92\xcd\xbf\xa2\x80\x1c?!y\xab?!\xc2\x88\x0e\x1f\xa1\xda?\xfa\x18?\x98\xe4\x08\xe7?\xb8\xe7\xc6\xcc\x9d(\xe8?\xb4\xe9L\xc6x\x83\xe8\xbf\x82S\xf79\xce\xf5\xdf\xbf\xf6\xcd\xca\x07\x9e\xd8\xdf\xbf\xd5\xd0\xb8D?\xec\xc7?\xa8\xa6\x06\xcc\xe0\xf2\xea\xbf\xb5u\\\x85L\xd0\xe1\xbf\xd7\x8dz\xddo8\xb0\xbf\t\xe37\xd7\x0f]\xb7\xbf\xf4\xdc\xb4\xa0\x9fD\xd1\xbf#\x04{Vy\xd3\xf2?\x82\x8f\xd9\x03,2\xe9?\xa4\xd6\xf6\xf8P\x12\xc1\xbf\xbf\x1d\x17y\xcf\x82\xae?@#\xa7\xaeN\x0e\xd7\xbf7\xd3\xb2\x9c=\xee\xeb?\xc9\xad{\x89\xfa/\xd9\xbfTH<)\\\x89\xb6?\xac\xb3}\x9dg\xf4\xd4\xbf\x16\xc98<5M\xc3\xbff\xc4Y\x9f\xe6\xd5\x92\xbf[\x86\xfc\x83\xc6/\xee\xbfA\xa0\x81=4c\xba?^\xbd\xd0\x0f\xffq\xe4\xbf9\xc6\x1e!\xa7Y\xb1\xbf\xe7-\x96\xf8\xa3)\xed\xbf\xe1M\x00z\x95\xe5\xc8\xbf`\xa8\x91\xb07]\xe2?\xd4\x11\xaa\x89\x06\xb2\xa9\xbf\xa5[\x89\xeb\xb4}\xea\xbf|\x86\xe56\xba\xc2\xa5?aB\xd5;e{\xa7\xbf\xb6\xd6\x85\xb2\xecm\xd9\xbf\xb8\xc3\xe3\x1d6\x9c\xd1\xbf\xcd\xf5v\'t\xfe\xef\xbf\x0b%!\x91\xc5<\xd2\xbf\xc3\xa6\xae+A\xce\xc2\xbfK|m\t\xeb!\xc1\xbf0\xdc\xa8\x13^`\xdd?a\xc8\tL\xfd\xc7\xe1\xbf"7\x00=r^\xd4\xbf\xa4E\xc6\x8f\xaew\xdf\xbf%\x86_\xda\n\xfb\xca\xbf\xcc\xda:\x017\x06\xe1\xbf\xe9\xdb9\xb7\xd4\xd7\xe0\xbfB\xfd\x1b\xdd\x9bb\xe4\xbf\x0f\xe7\x8e\xb4\xefv\xe2?\xd7\xadw2\x81\x1a\xeb\xbf2u\xf9K\x9ao\xeb\xbf\x97J\xd0#\xeeD\xc8\xbf\xc6\x13\x98\xb9NR\xdd\xbf\xfb\x80\x14\x04\xa0=\xd7?\x17\xf2\xde\x08\x06\xd6\xeb\xbf\xaeV}\xf1*\x03\xd3\xbf\x90\xdf!\xb7\xeb\x80\xd2\xbf7\x99\x1ea\xd0\x7f\xd0?\xb1#\xc2\xa7\xea\xed\xe1\xbfZ1\t\x8a\xcc4\xc1\xbfH\x9e\x15O]\x17\xc9\xbf\xc1\xa7Q\xad\xd7\xcb\xc5\xbf\xbf\xc2\xbe3\\\xdb\xd0\xbf\xb9\x08\xbaQq\xc0\xd0\xbf\x176\xd6\xc0oC\xbb?\xc3\xc7\x8e\xe3\x12\x92\xc7?\xd8XI\xe9\xfa\x1e\xde\xbf\xba\xe0\xef\xbd\xb0\xda\xca?_\xbc\xe9\x10Z\xee\xcb\xbfg\xf1#\xcf\x15\x9a\xb5\xbf\xfbk\xda\x1a)3\xd4\xbf\xbd~\xe7M\xe4\xf2\xea?\x14\x0c\x93\x10\xf9\x1d\x9d?!\xc6\xe8%\x0f\x86\xd0\xbf\x84\x8c\xf4\x1a\xef6\xb0?\x11/{k\xa4"\xcb?\x15\x94^\xfd\x11%\xe0\xbf\x90\x05\x9c\x03@\xe2\xd1\xbf\nY\xe0\xcf\x99\xe2\xd5\xbf(\xb4\x18\xdcce\x87\xbfm\x9a\xb2\xbd\xfco\xd3?0\xcf\xf2\x15\xd2y\xd4\xbf\xf4\xd6p\x95\x1d6\xcf\xbf\xea\xbd\xa6qa\xfd\xd1\xbfR\xb7"\xb1Sh\xe8\xbf6B9:\xd8\xcf\xcd?\xab\xad\x9f\xff[\xc8\xe3?\xee"C\xba9_\xea?\x0c\xa6\xc5W\xba\xfd\xae\xbf\x8e\xe2\x9e\x13\x0e\xa0\xb2?G\xa82\x85\x1a\xa6\xc1?#$\x8fW)\x05\xd0\xbf\xed\xf0\xb8\xaf\n\x1f\x03@\x0f\xe9i\'\xe5\xea\xff?K\xc6R\xc1[\xbd\xa7?\x95\x06RD/\xff\xce\xbf\xa5\x8cNR\x16\x81\xf0?\x9f\x94\x85y\xe6\r\xd2\xbfpa\x19\x01\xd0b\xb1\xbf\x04\x11\xe3?wE\xb7?\x88\xc8\xeb\x7f\xda\xe8\xb5?\x13\x0e-\xa4rs\xc3\xbfc\xdf\x8bv\xc5\n\xc2?C\xf6\\\xf5\xdf\xcd\xe6?\xc7@\xd2[\xa8@\xd3\xbf~N\xf1\x05\x8eK\xd8\xbf)\nf\x12\x90\xc9\xe5\xbf\x0f\x80\n\x94\x8d\xc0\xda\xbfL-\x7f0)\xc5\xd1?\x04\xb0$\xf2\xda\xde\xee\xbfc?w\xe3#\xc5\xd6\xbf\x1e\x87K\xf3\xa2\x12\xda\xbfg\xec\xc6:\x8b\xb9\xa8?\x06;!p\xb0\x07\xe4?\x17q\xb551\x12\xdb\xbf\xbei\t7`O\xcb\xbf\xe8w\xee\xb4\x020\xa1?\x88\x07\xc7\x18\xbf\x81\xbe?U\x03\x11.m\x90\xd1\xbf\x8c\xd5#\xec\x94\x03\xd5\xbfQ6\xdb\xb7\x99\x08\xe2?\xb3\xab6\xe4\x8aH\xda\xbfQ\xe1\x10\x83=\xa6\xd1\xbf\xf1N\xfb\xf2\xfa\x0e\xd2\xbf\xbc\xd8\x97\xf5!\xa0\xbf?\xad\xb1\xe4Z+\xf6\xee\xbf\x1bg\xf3W\x04w\xe6?\x99\x02\xc3K,e\xdb?\xe6W\xf6Q\n\x04\xb7\xbf\x973\'v=\xc9\xc1\xbf\xcb\xa1\xbaU\xfb\xfb\xab?\x8a+\xa5\x00w{\xe6?]\x13\x18\x17\x00<\x02@(\x9e\xbb\xd1\xd3|\xca\xbfJ\x1e\xc0y\x80\xa6\xf9?\xa1\xf4\xcf\xac\x08\xa0\xd2\xbf\xed\xc0g\xa3-j\xe7?\x86B\x07\x14\xd8\x03\xe5?\xe9\x9ct\xa2\xe7\x1f\xd0\xbf4}8\xb5\xa2\x97\xc0\xbfC\x9e\xddc\xe1o\xa5\xbf=1mQ\xa4\xe3\xdd\xbfb\x0e\xd2\x159\x9e\xf2?~\t\x83\t\x83\x81\xcd\xbf\xab5?\xba\xf2\xf9\xcc\xbfs\xad\xc8]\xb5\xfd\xd1\xbfY\xe7\xa8(F^\xe3?\x05_\x02\x08\x91\xa0\xd4\xbf\xd5\xb4\xc7\xd5\xd1!\xd7\xbfOG\xbb\xacs\xc9\xe3?D`\xa3\xa1\xb5^i\xbf\xc5\xf0\xa4\x13\x81(\xcf\xbf\x17\x98\xe3\xfd\x8as\xe2?\x0e_\xfa\x86\x9e\xae\xc7\xbfJ&HE;\xd8\xe1\xbfy`T\x8a\xf7\x1c\xc3?Z\xabQ\xce_\xf2\xc7\xbf\x1eI\xf8w\xc7\xff\xe0\xbf\x0eL\x19\xfb\x00%\xde?f\x90\x9d\x99\xc4\x03\xc3?\xee\x1a\xf9O\x02\x0c}?&HO\xf7\x08\xac\xc3\xbf\xce:\x19\xcc6\x18\xe2?.h\xb8\x94\xe7P\xe7?Y_\x1c\xce\xf2g\xd4\xbf\x953v\xec-\x1e\xd9\xbfm\xc9\xe5m$\xac\xda?\xa8\x99\x1a\t\\\xd1\xe0\xbfx+\x175\x10\x8d\xa2?\x19\xb7(K\r\x01\xe6?\x87\x00\xe4.\x15\xd7\xbd\xbf)\x80\x90A\xbb\x7f\xc6\xbf`\xf6jh\xd3\xd0\xb0?jO\xff0\x03\x97\xe8?l\xf1t\x86\x1c\xb8\xe3\xbf\xbb\x8bt\xf5g\xa8\xe7\xbf\x01\xf6\x7f\xdbv\xa0\xdb\xbfd<\xb8\x0fC\xf7\xb9\xbf\x8c\xcaT\x0c+\xbe\xe4?\xa6z\x1a\xf7e*u?\x99\xa5\xb1\x89\x02\xb8\xba?\x98\xb0\xd2\xaa\xa4\xd6\xb3?*\xa1\x9c\xd9\x9a\x9d\xd2\xbfnz\xf0\x8b\xc2\n\xdc\xbf\xe6}[\xcb\xf9$\xb1?3!\xfed.\xb1\xd0?^\xe3\xdb:\x8d:\xc9\xbf6F\x03\xc8\x82\x1a\xcd\xbf\xfdB\x08]bQ\xe6\xbf\xd8\xb5\x94\xe2\xda\xd3\xd9\xbf+}&|%\xbe\xea?<Pn;?\xe7\xb0\xbfA\x8bAh\xd8\x8d\xe9\xbf\xf0\xde\x91S\xd9\xfa\xdd?\\j\x16B\x99\x96\xc3\xbf;\xdd\xba\x8c\xf0r\xe6\xbf\x1f[\xe9\xbb\xe1\xb2\xe7?\x15\x14\xfdT\xf9\x89\xe8\xbf{93\x9b\xbb\xba\xc1\xbf@E%9\xb4F\xe2\xbfZ\x1fBm\x81\xd2\xb2?\xf1\x84\xcd\xf9\x10\xa9\xe6\xbf#\xa1\x06H0\xd8\xe9\xbf1\xc20 \xb8\xcf\xbd?\x1e\x96\xd9\x19\x7fl\xf1?\xc6e\xfcA\xcbi\xe8?\xa8\x8c\xbc\xc7n\x93\xb1?\x8cRz_\xd9\xd7\xc7\xbf\x01\x05\xce\xe9\xca\xf8\x8b?\xf5m\xa7\xa9\x0c\xcd\xe4\xbfu\\\x9b]\x98\xa9\xc4?J\r79\x04\x03\xcd?\xe3F\x0e\x83\xae\xec\xe6\xbfvB\x18\x14g\xb8\xe6\xbf\x88Z\x89Q\xaa\xba\xde?|8\xe3\xfe\xdd\n\x85\xbf6\x0e\xb8\xe8\xcc\xda\xc5\xbf\x0c\xc1\x89\x05g\\\xe0?N`d}.D\xdc\xbfwz\xc5\x97\xe9\xc9\x8b\xbfd1\xc2\xa6#\xdf\xd3\xbf\x869\x16\x99\x11\x85\xe6\xbf\xb7\x82\xcd\xe7\x8b\x96\xee\xbf%]\xd3\x06\x18\'\xb8\xbf\xec\x90\x1do\x95\xf1\x9e?%\xb0\x91]\x12\xb5\xc5\xbf"S\xcdQM\xb0\xf0?\xb8Uj\xf2\xae\xd9\xc5\xbf\x11\x93\xc8\xed \xe6\xd5?\x81\x08@\xbfU\xac\xe4?\xb8_\xf9\xf3\xbd\xa3\xe2?+-\xc1ov.\xe0?\xf1`B %V\xae?\x96\xd8f\xc4\xe0\xe2\xc9?\x02\xbfJ\x1bW\x10\xed?j\xaeM\xe3\x87\xa7\xde?\n+=\xed\xa5\xf8\xc9\xbf\xf5\x11\x92\xf1\xdaD\xca\xbf\x89\r\xab\x98\xb5\x03\xd4?/\x1f\x1f\xe84\xeb\xe0\xbf\x0b\x19\xa9\x02\x9e2Z\xbf\xd1K\x97\x07"\x81\xe0\xbf\x8e\xd3\x9cp%\x89\xbe?\x8b\xadnh\xe6\x8c\xd7?txt\x97\xaf\xd1\xe2\xbf\'3\x88$\x9f\xfa\xea?\xcbPAY\xddL\xcf\xbf!{\xe0\xcaMG\xd6\xbf\xe2-\x0f;\xa4\xdf\xe0\xbfE\x02"\xbbaZ\xcf\xbfr\xd7\xdbCF\x1a\xe6?\x96{\xe2]\x9ff\xe1?\xe7\xca\xfb\x8af|\xc2\xbf\xd1\x9c\xa0?U\x0c\xe0\xbf\x8f_\xb0XB\x95\xe7\xbf\x961\x0b\x03\xebV\xc2?`\x86\xba\x08Du\xcc?\x00\x00\x00\x00\x00\x00\xf8\xff\xbd\xb0cv\xc0i\xe9?\x8c\xcd\t\x8bHi\xf1?D\xcc\xcd\xe3*\x1a\xe9?\xda\x0e\x06\xc6\xba4\xe9\xbfM\\\xab\x0e\x9e\x96\xd7?\xc9{c\nVT\x8a\xbfz\xbe\x87\xa6\'\x15\xc7\xbfX\xf1\xa7\x17\xf9\xa9\xcf\xbf\xb1\x18"U\xf0\xfc\xdc\xbf\x9d\xc1.\xd9\x00\xcd\xd0?\xae#{\xad5\x02\xdd\xbf\xad\x16\x1b\x0c)`\xcb\xbf\xb7\xb7\xc4BX\'\xd5?\x00\xb2\x84$\xa5U\xd3\xbf\xe1?pc\x851\xe4\xbf\x1c \xa5X#\xdd\xdf?\xa1\xa9\xfb\xf9i&\xba\xbf\x11\x86$K<N\xe0?\xbf~[\x94\x9c\x1b\xe9\xbf\xe4\x89\xf7\x9c\xc1\x15\xae?\xa8\xb3{w2\xec\xad\xbfL\xcb\xc4yZ\xdd\xd4\xbf\xd5\xa5\xd6\xaeFz\xe0?\x8e\xb8\x02\xe6\xa2\xca\xdd?\xd1x\xb4s\xe2\xdb\xed?K\x85\xa8\x93\xd3L\xe0\xbf-\xce\xdcTFD\xda?\xd4=\x15jd\x92\xc8\xbf\xda\x9c&\xf4\xd2\x10\xdb?\xca*`,+b\xd0\xbfP\xf1>\x90\xac\xc3\xe1\xbfk\x19\xc5\x02\xe9l\xc5\xbf\xa0\x87\xf8\xd3\xb6\x92\xd0\xbf\xbaP\x16\xda\'#\xe4\xbf\xb6c-\xfb\xa8\xdd\xdd\xbf\xa3\xed\x8a\xfa\xee\x7f\xb2?\x98\xdf\x94\xc0d\xca\xc2\xbf\xb7\x03\xd1r\xeeb\xe8\xbf\x10\'\x8aU\\S\xe0\xbf\x14X\x87u\x9bq\xdc\xbf\xa9\xe1_\x98\xb2\x0b\xd6\xbfv\xb9\xea\xa7"\xe3\xe3?\xe9.\xc2\x8c\'\xa7\xc3\xbf\xaf<\xf6\xde\xe1@\xda\xbf\xf3\xf9\xe1W\xd0\xaa\xec\xbf`h\xbeR\xe7>\xe7?\xff\xca\x93n\x1b\xf0\xee?\xb88xJ\xb5~\x9f\xbf*\xb4#\x81\xf2\xd5\xdd\xbf0\xe3\xd5\x8f2d\xa2?V8\x9e\\\xfeB\xef?\x1bs\xd1e2\x91\xc5\xbf\xf8\xdc-\x97\xb5\xc0\xcf?\xd2\xb4\r\xaa\xcf\xc8\xc4?<\xa4@\x04\xe5\xf7\xe0?\x8fb\x83\x99!l\xb1\xbf\xa0z\xe7\xc6j2e?\xddKG\xd3|h\xdc?s5\xde\x82\x92U\xe0\xbfk\x86N\xbc\xf7\n\xe0\xbf\x8c\xb7\'\xab\x0f1\xce\xbf\xbb\xac\x8c\xaa\t\xd6\xdc\xbf\xd0Q\x01\xaak?\xdc?\x91~`0c\x03\xf2?\x12MG\x8by\'\xe7?\xf2\x1aO\xcd\xa3j\xeb\xbf\xd1M\x8d\x96\r\x04\xe4?\x10!N14\xae\xc7\xbf\x8b\xbe\x0b\x12\xb1\xfe\xc4?\xdd\xdd\xc0@\x01\xee\xe9\xbf\x0cF)tzS\xcf\xbfy\x97\xf3\xc4!\xdd\xa8\xbf8l\xafR\x8d\x13\xe4\xbf\x9e.g\xcd8?\xe2\xbf\xb0\xeb[\x8e\xa4\x87\xea?\x14\x19\x19\xedH\x02\xde\xbf\xcf\xd6\x99\x81\x84\x8a\xca\xbfw/\xd9\x87ss\xe5\xbfM\x85\x1bv\xecL\xd2?~\xcaM\x833\xc8\xd0?\xb3\x8e\x01\xb0\x0cF\xde\xbf\x014\xe1\xbe\xb2\xc9\xda\xbfO\xd8\x8aF\xb3\x98\xcb\xbfjX>"HJ\xea?\x92}\xcd\xebN\xd5\xe5\xbf\xe0\xc9\x91e(*\xc6?Kz@\xb6G\x19\xe0\xbf\x16\xf1\x99\x88\xf6\r\xc6?\x9d\xcd\x8c\x8a\xb9\x8a\xeb\xbf\x89\xacp\'\xa8\x86\xea\xbfg0\xf4T\xb5\x92\xcd\xbf\xf6\xeb\x96\xef\x8a\x93\xb2\xbf\xf4Y\x89\xc5\xb5\xb4\xc8\xbf\xbe\x9d|UYH\xe6?FN\x93\x05b*\xb4\xbf\xd6\tb\xf8\x951\xeb\xbf\x04\x01\x83 \xbe}\xca\xbfQ\xc1R\x01F\x81\xc2?j\xfe\x9e2P/\xde\xbf\xb1\xc0\xf9L*\xf1\x9d?\x04\xdcI \xab\x81\xe3\xbfV\x86"\'^\xb8\xe0?\x0ct\xdd}\x96\xba\xa9?\xaf\xb8\xe8\xf7X\n\xc9\xbf\xa3+\xe5f\xcb,\xe6\xbf\xd3\xa2j\x9fGi\xa5\xbf\x81\xe3\x19|X\xd0\xd0\xbf\xaf<\xd2M`\x81\xae?\xef,\xeb\xe5\xa6\xda\xc5\xbf'
p57
tp58
bag2
(g3
(I0
tp59
g5
tp60
Rp61
(I1
(I9
I512
tp62
g12
I00
[truncated: 2,512,097 more chars]
