# Supplementary figures and images for: How biological attention mechanisms improve task performance in a large-scale visual system model
Source: eLife journal article supplement (doi:10.7554/elife.38105), 2018-10-01

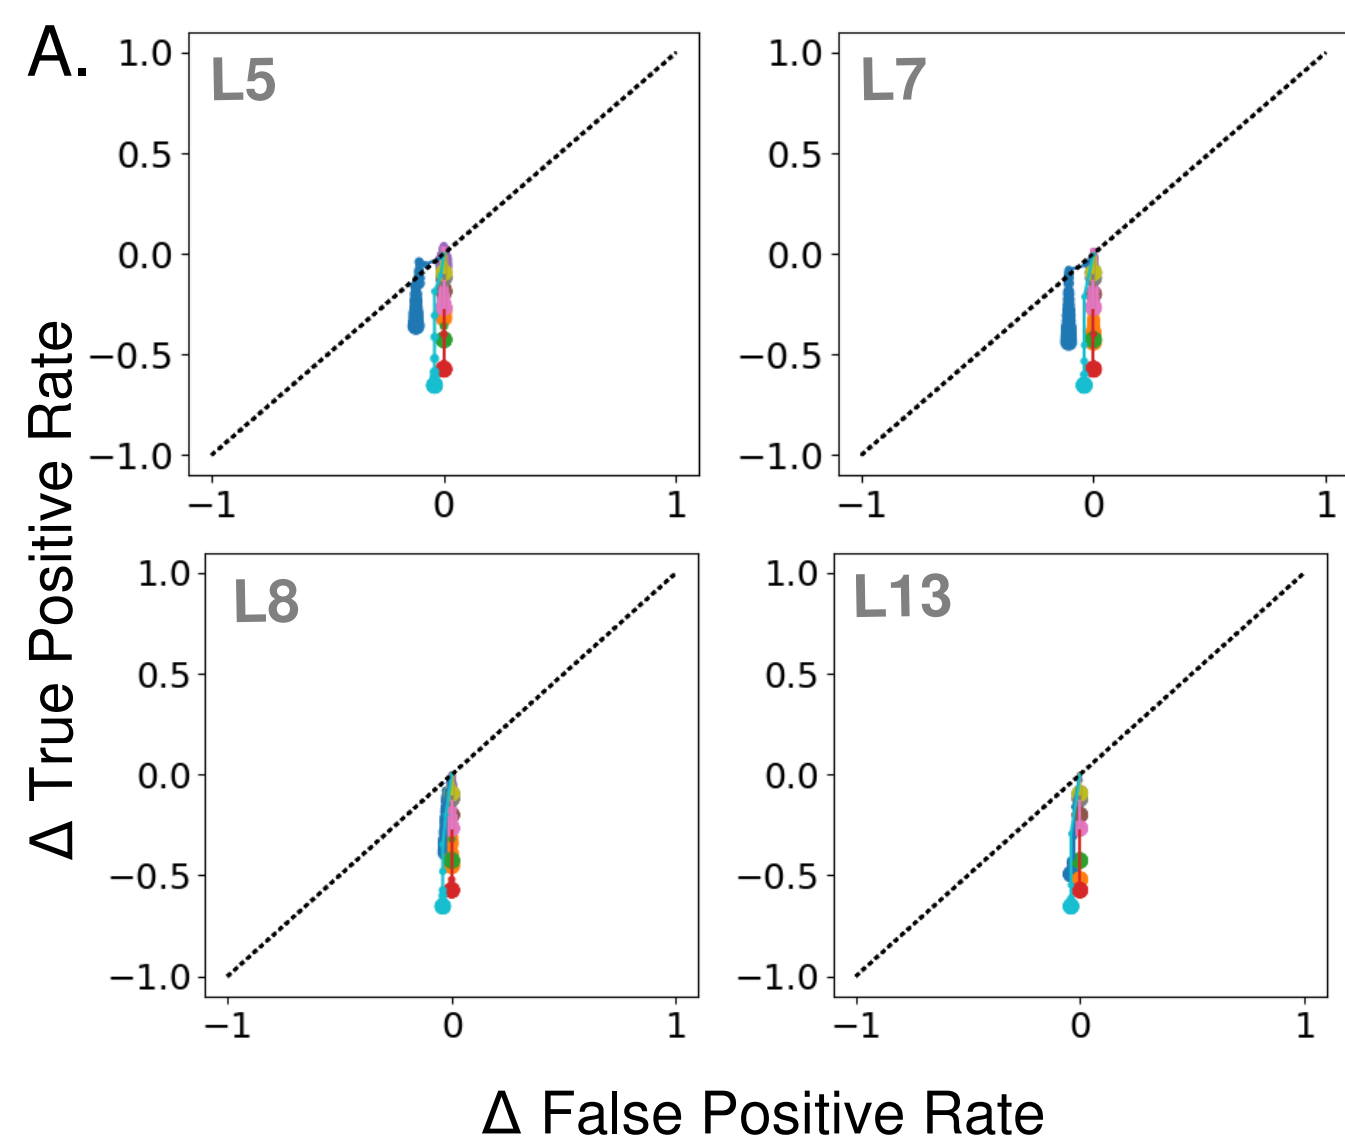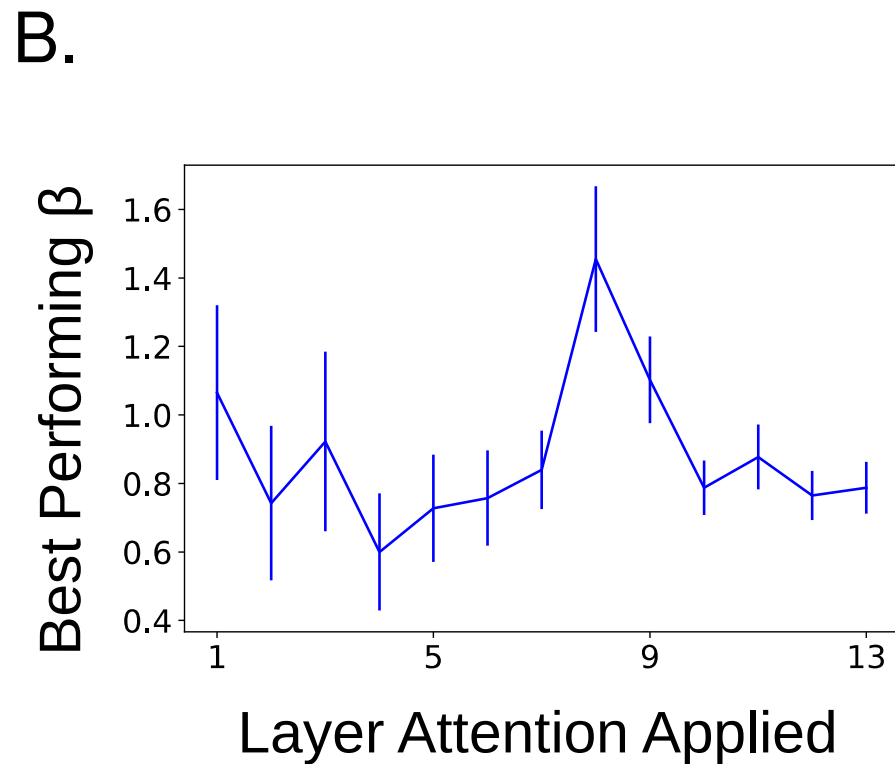

Supplement: supp [file elife-38105-supp-v1.zip]

**A.**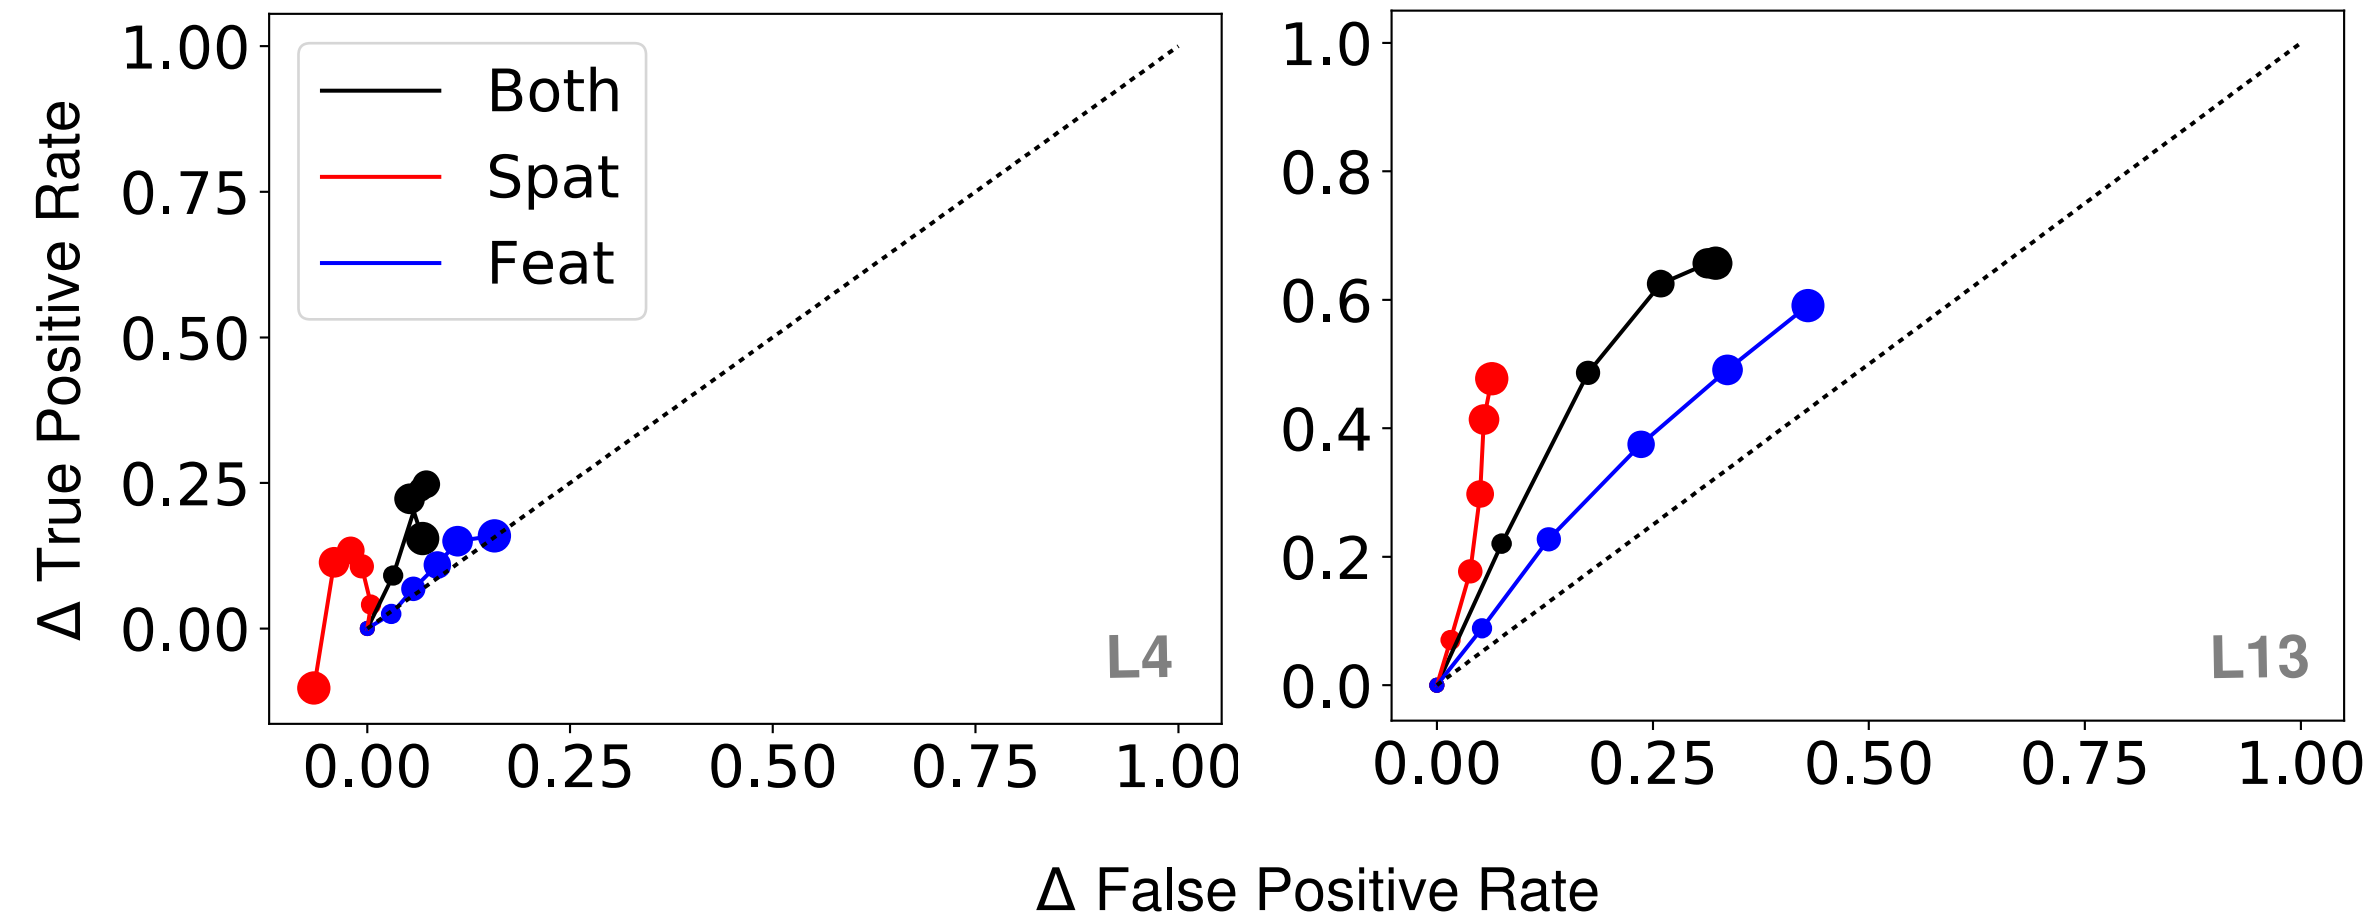

Supplement: supp [file elife-38105-supp-v1.zip]

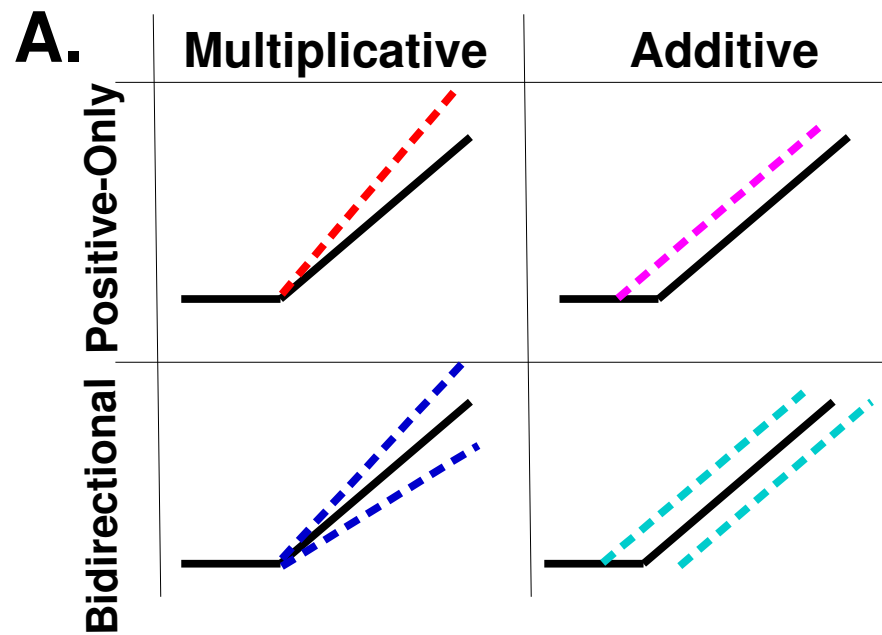

**B.**

Count (Best Performer)

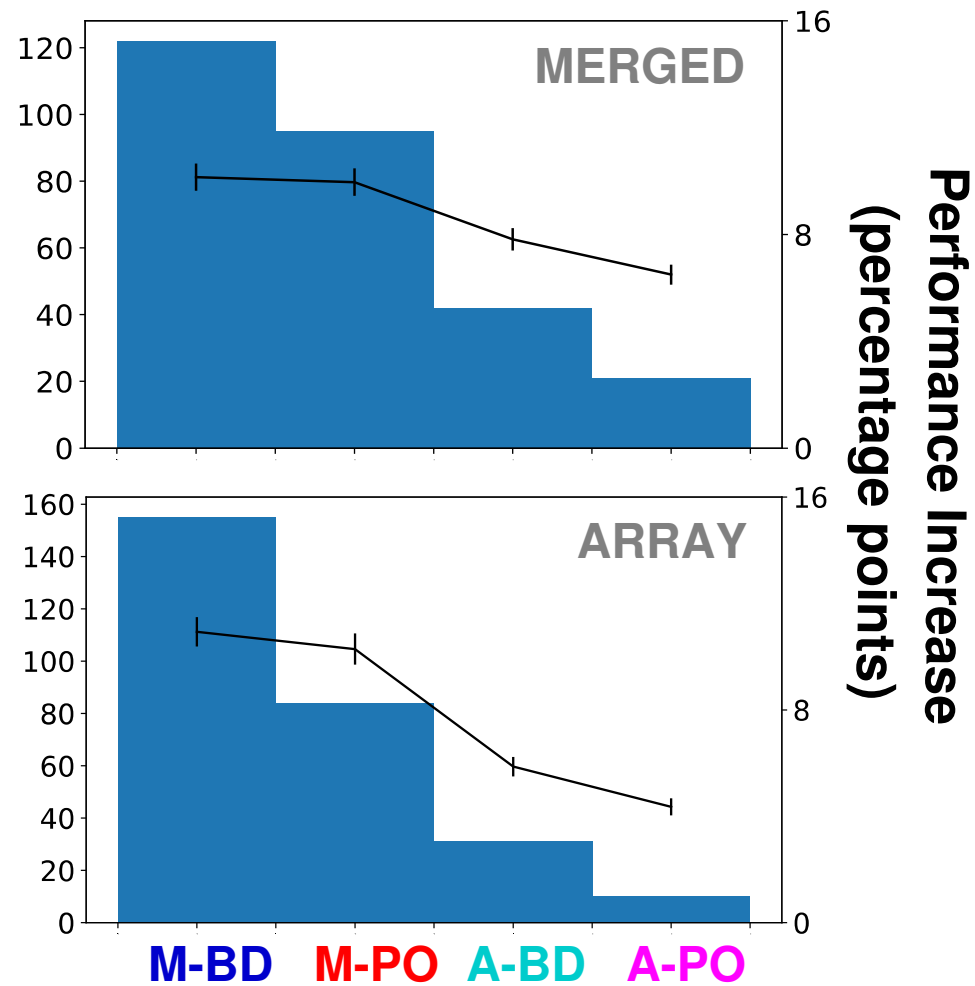

Supplement: supp [file elife-38105-supp-v1.zip]

**A.**

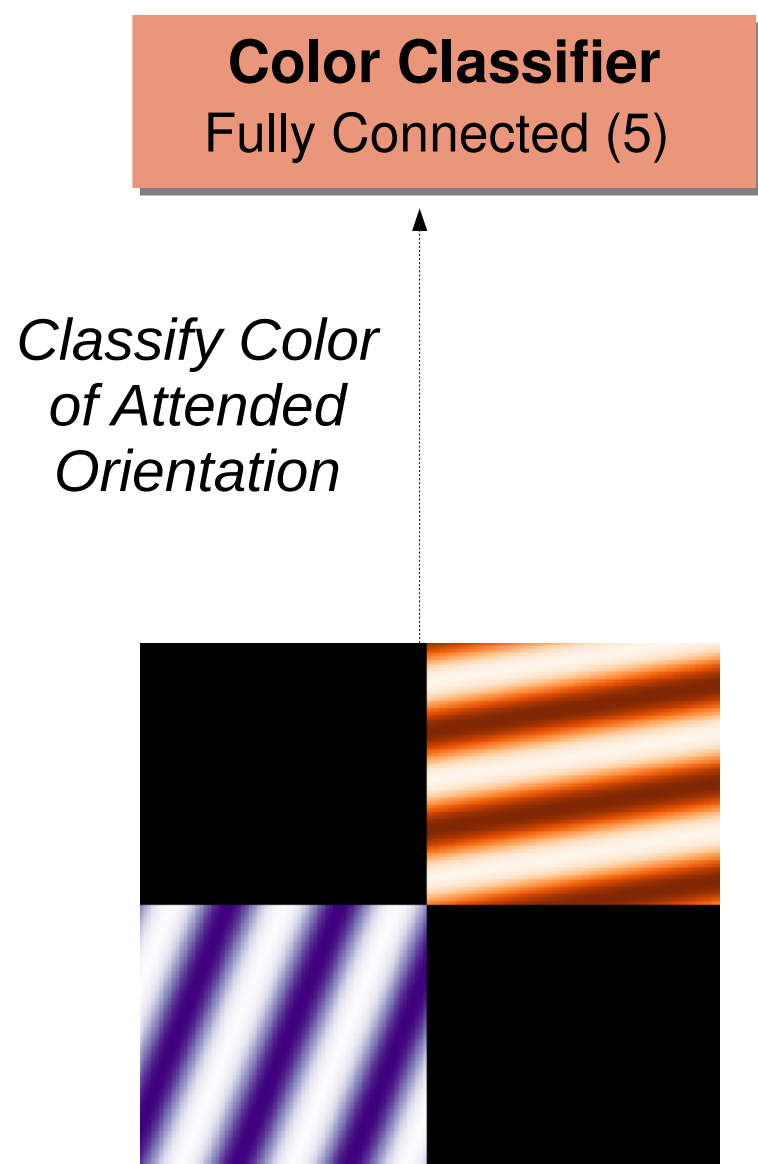

**B.**

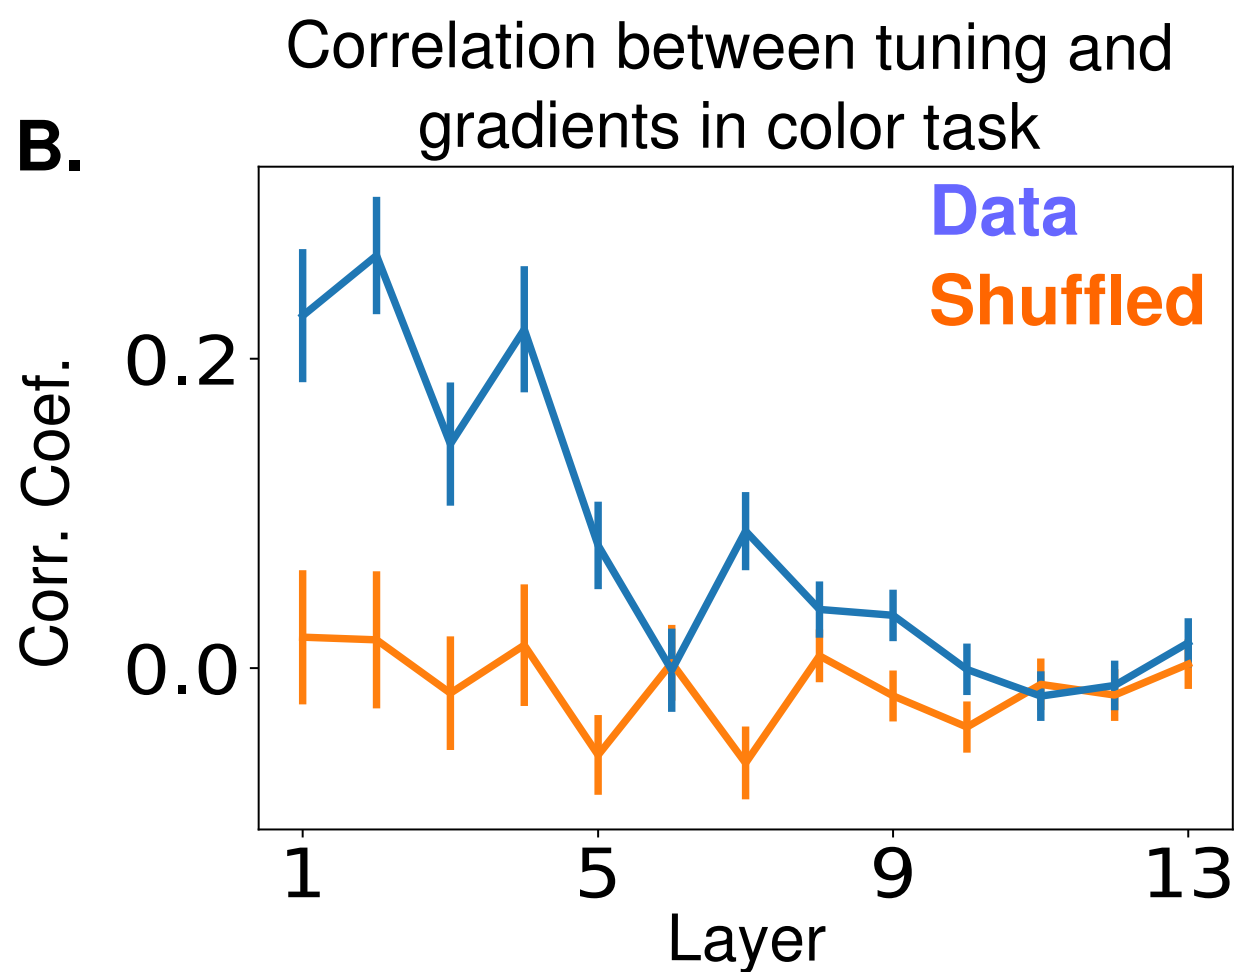

**C.**

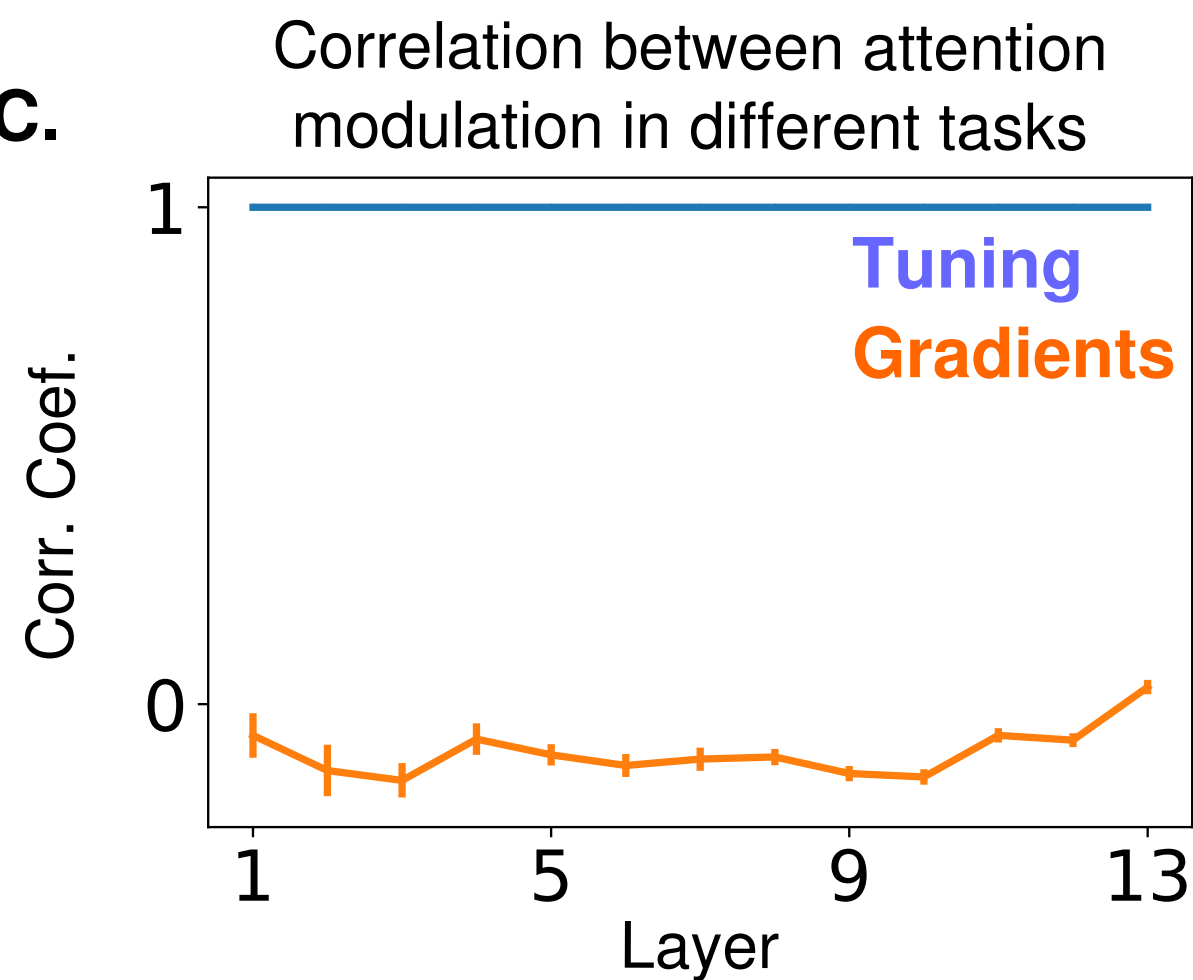

Supplement: supp [file elife-38105-supp-v1.zip]

**A.**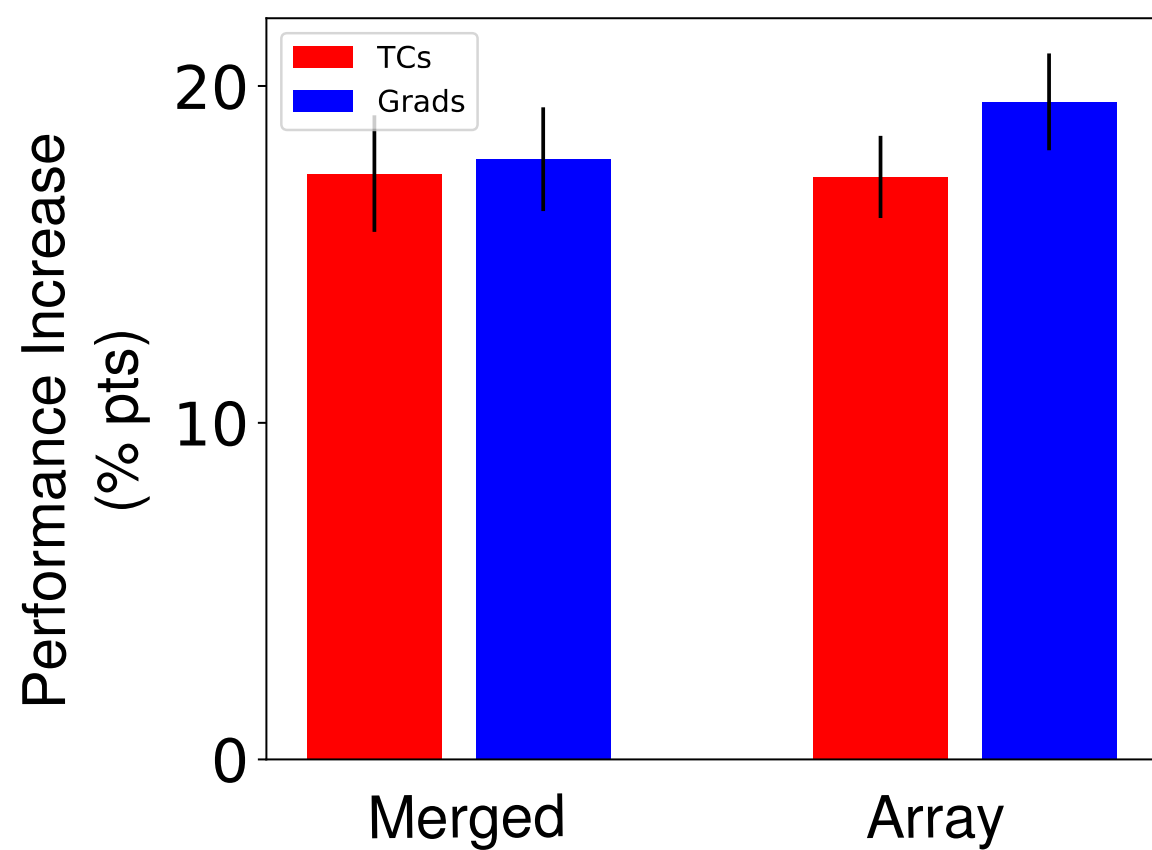**B.**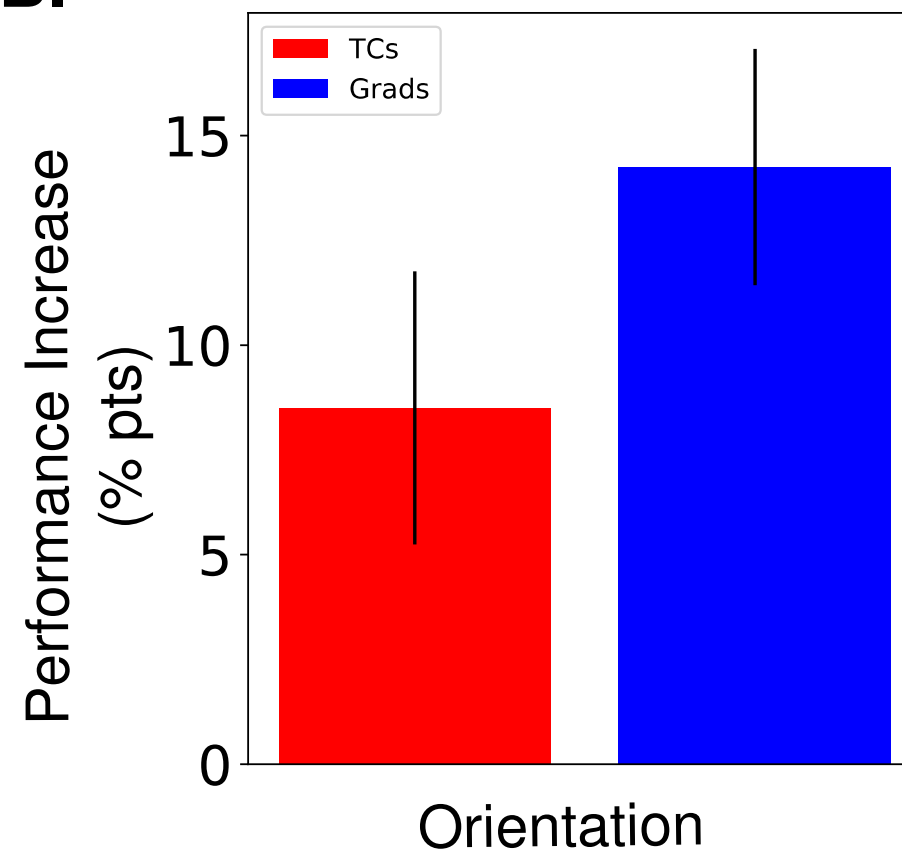**C.**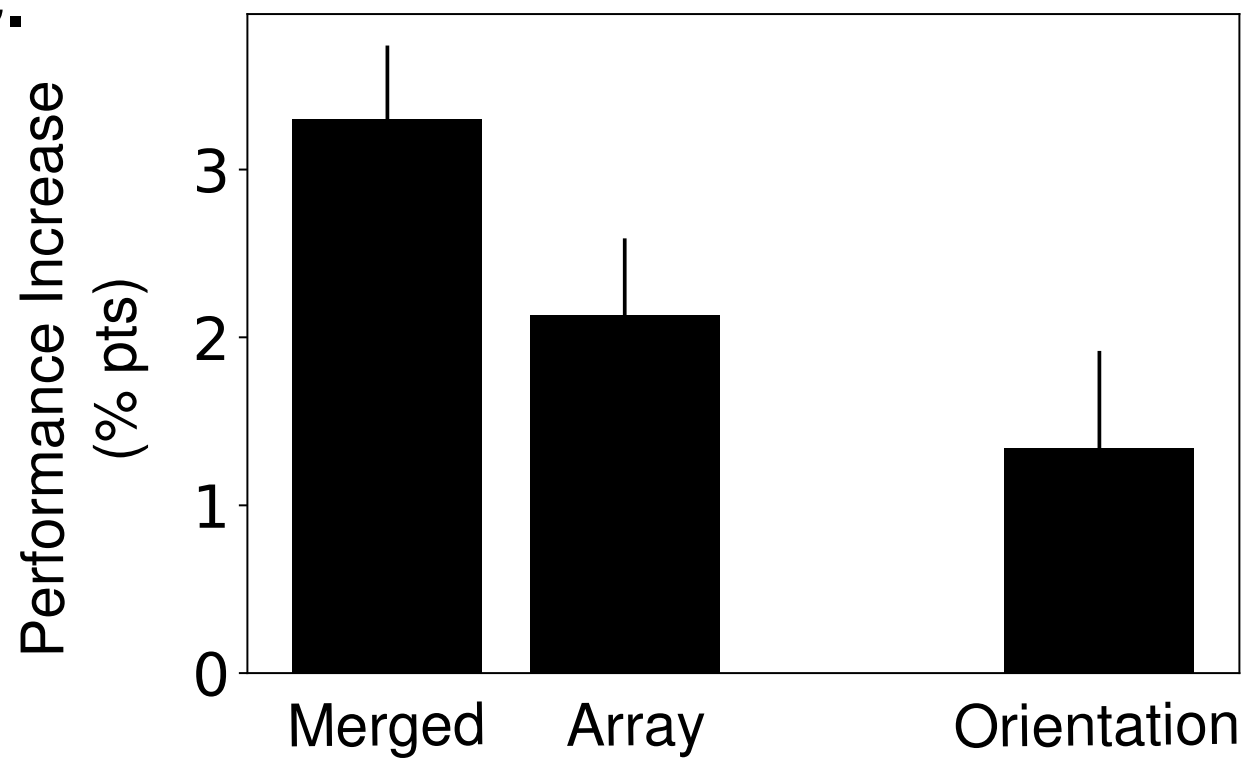

Supplement: supp [file elife-38105-supp-v1.zip › elife_poa_e38105_Figure_3_figure_supplement_1.pdf]
